# Supplementary material for: Every which way? On predicting tumor evolution using cancer progression models
Source: PubMed Central journal article supplement (PMC6693785; doi:10.1371/journal.pcbi.1007246), 2019-08-02

# Supporting Information for “Every which way? On predicting tumor evolution using cancer progression models”

Ramon Diaz-Uriarte<sup>1,2\*</sup>, Claudia Vasallo<sup>1,2</sup>

1 Dept. Biochemistry, Universidad Autónoma de Madrid, Madrid, Spain

2 Instituto de Investigaciones Biomédicas “Alberto Sols” (UAM-CSIC), Madrid, Spain

\* ramon.diaz@iib.uam.es

## S1 Figure. Plots of simulated fitness landscapes and fitness graphs.

---

### Contents

|   |                                                          |     |
|---|----------------------------------------------------------|-----|
| 1 | <a href="#">Fitness landscapes: explanation of plots</a> | 1   |
| 2 | <a href="#">Seven genes</a>                              | 3   |
| 3 | <a href="#">Ten genes</a>                                | 634 |

---

### 1. Fitness landscapes: explanation of plots

Here we show the 1260 fitness landscapes used. The first section, “Seven genes”, section 2, shows those for 7 genes, the second section, “Ten genes”, section 3, those for 10 genes. In each section, the first 210 fitness landscapes are fully representable fitness landscapes, the next 210 are the “Local maxima” fitness landscapes. The next 210 correspond to Rough Mount Fuji (RMF) fitness landscapes. Landscapes are not ordered according to any criterion within type of fitness landscape.

In each page, the following figures are shown:

**DAG of restrictions (top left)** The true DAG of restrictions. This only applies properly to the representable fitness landscapes. In the local maxima fitness landscapes, not all paths between genotypes are available. (See below). For the RMF landscapes this, of course, is not available, since there is no underlying DAG of restrictions.

The true DAG of restrictions could be a tree. Among the representable fitness landscapes, 30% and 2%, of the landscapes with 7 and 10 genes, respectively, were trees (i.e., can be represented by OT and CAPRESE).

**Fitness landscape (bottom left)** As it says, the fitness landscape. Boxes surround the fitness maxima in the 7-genes landscapes. To minimize clutter, genotype labels are not shown in the 10-genes landscapes.

**ID and landscape characteristics (center)** The ID of the fitness landscape (a random string that matches the value of ID in the data tables), the number of accessible genotypes, the number of fitness maxima or peaks. Values for “removed edges” and “prop rem edges” denote, respectively, the number and proportion of edges in the fitness graph that were removed; this only applies to the “Local maxima” landscapes; thus, these values are 0 for “Representable” fitness landscapes, and NA for RMF fitness landscapes.

**Fitness graph from DAG of restrictions (top right)** The fitness graph implied by the DAG of restrictions. Not available for RMF (since there is no DAG of restrictions).

**True fitness graph (bottom right)** The actual fitness graph that corresponds to the fitness landscape. For “Representable” fitness landscapes this would be the same as the Fitness graph from DAG of restrictions, so we do not show it (to make the size of the files smaller).

Thus, a simple way to tell what kind of landscape you are looking at in any random page is this:

- If there is a fitness graph on the top right and no fitness graph in the bottom right corner: a representable fitness landscape.
- If there is a fitness graph on the top right and another fitness graph in the bottom right corner (with, necessarily, fewer paths than the graph in the upper right corner and at least two local maxima): a local maxima fitness landscape.
- If there is only a fitness graph on the bottom right: a RMF fitness landscape.

## 2. Seven genes

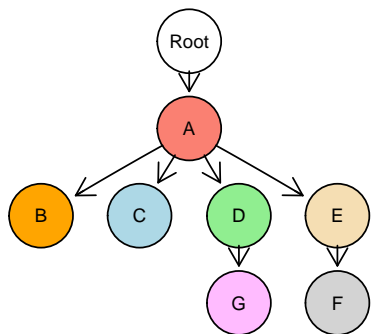

ID 1010kGD9gL10Sq9tJsP  
 acc genotypes 37  
 peaks no back 1  
 removed edges 0  
 prop rem edges 0

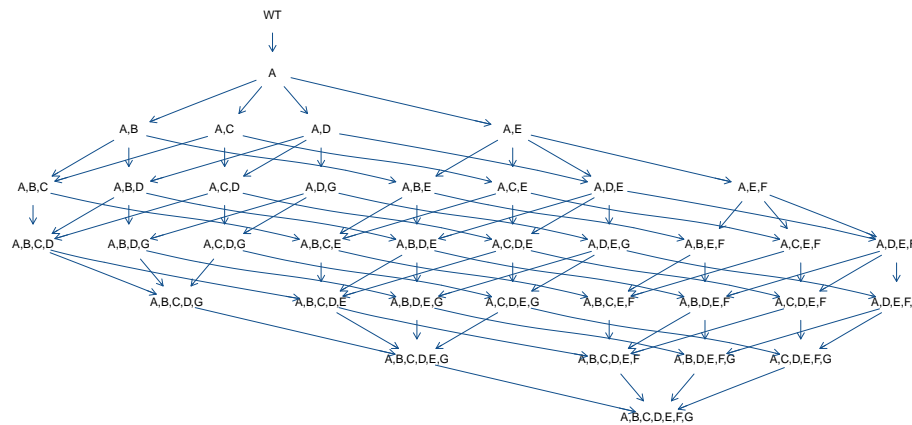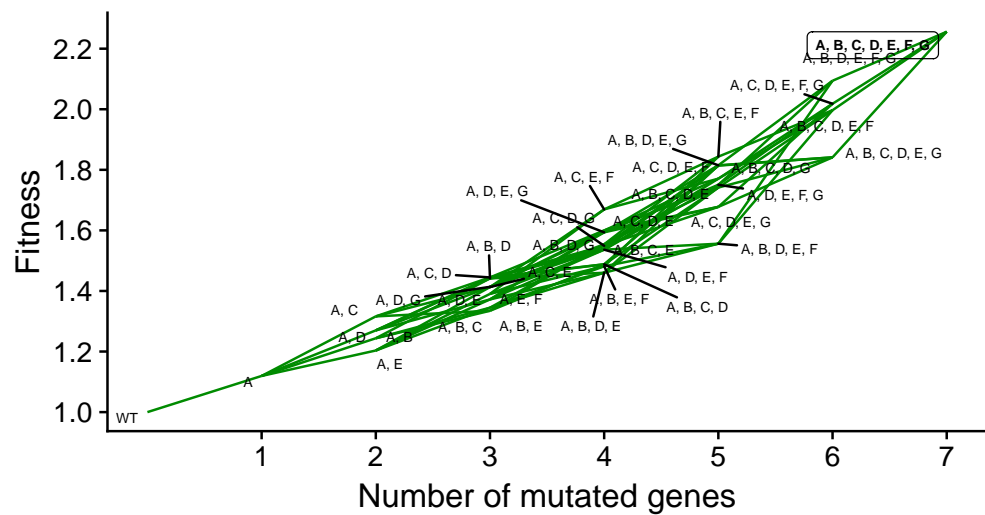

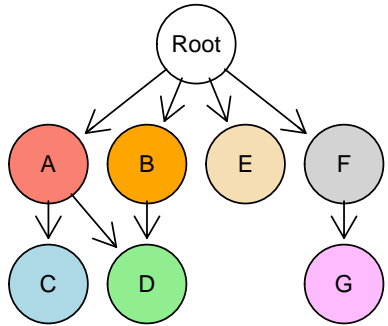

ID 10Dgx114YRhmToSuW  
 acc genotypes 48  
 peaks no back 1  
 removed edges 0  
 prop rem edges 0

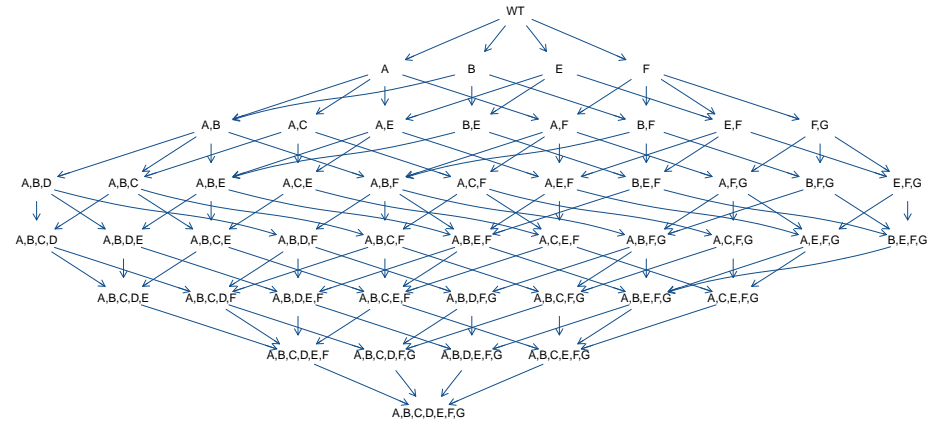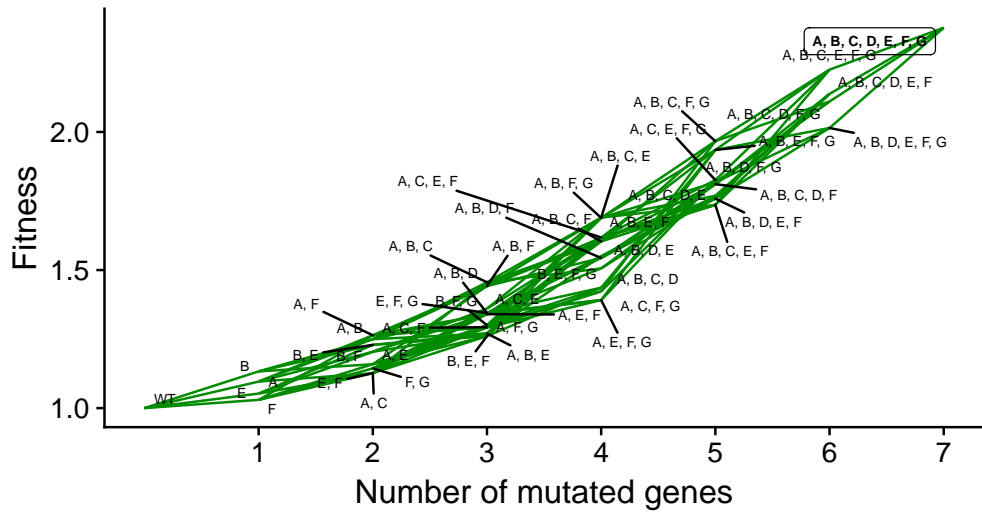

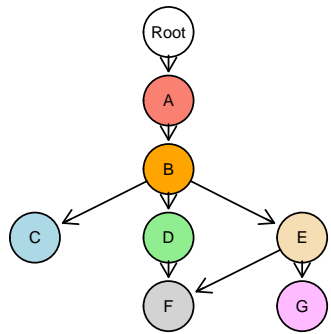

ID 1g3AE5zjGYmnuTbC  
 acc genotypes 18  
 peaks no back 1  
 removed edges 0  
 prop rem edges 0

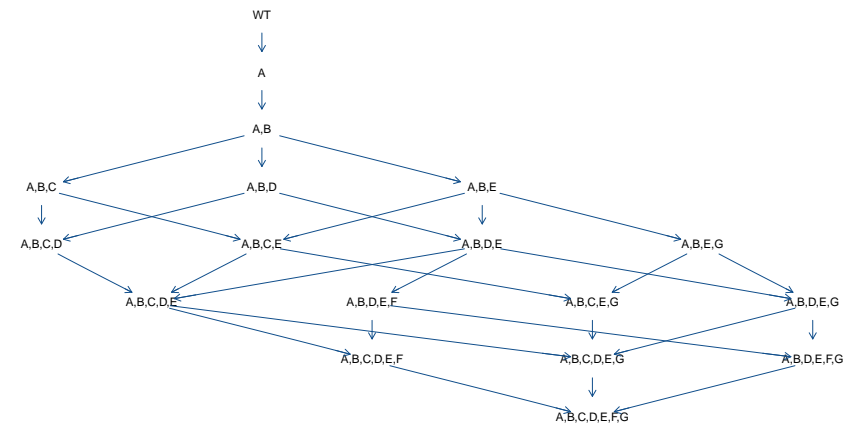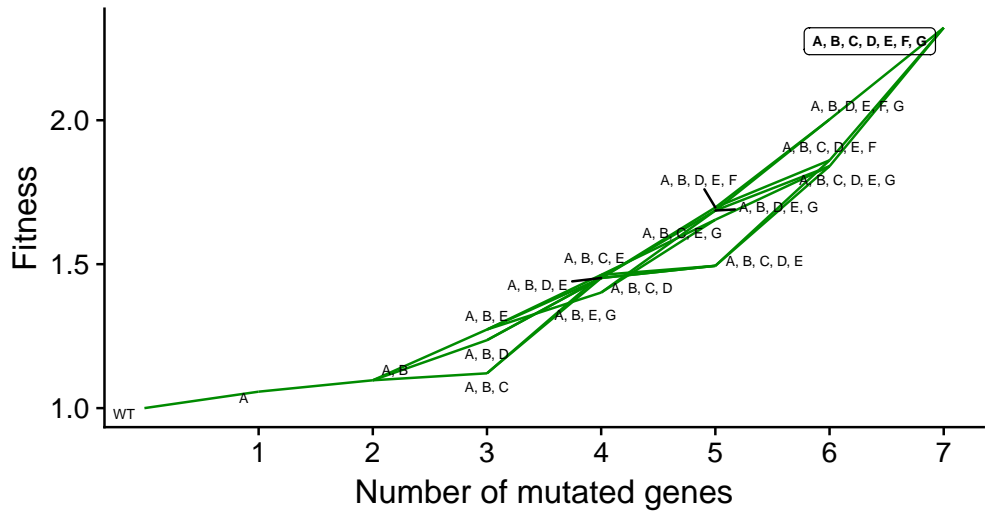

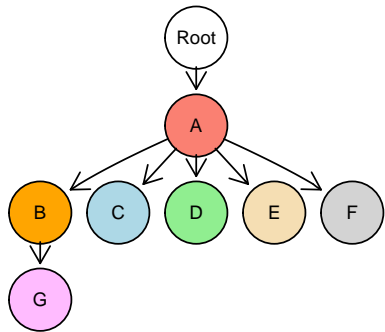

ID 1HutaalyIPzhYID  
 acc genotypes 49  
 peaks no back 1  
 removed edges 0  
 prop rem edges 0

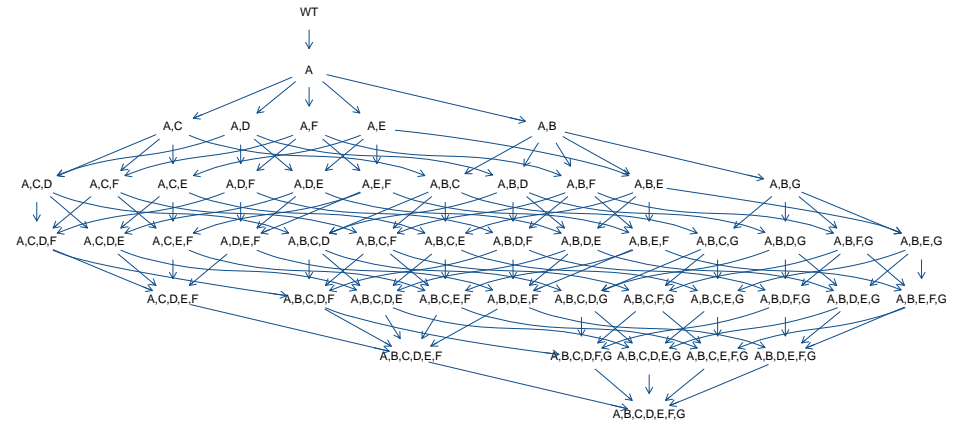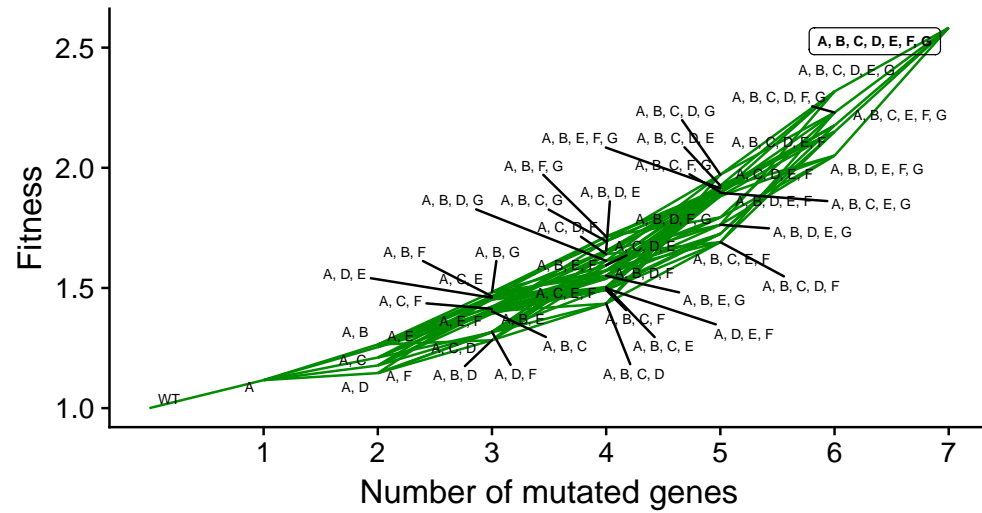

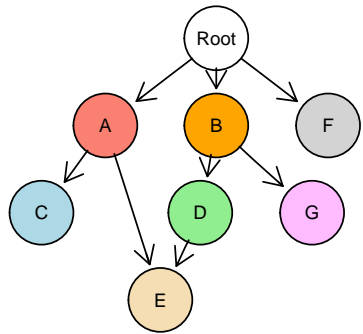

ID 1Mj1yzbmqyN510otm  
 acc genotypes 38  
 peaks no back 1  
 removed edges 0  
 prop rem edges 0

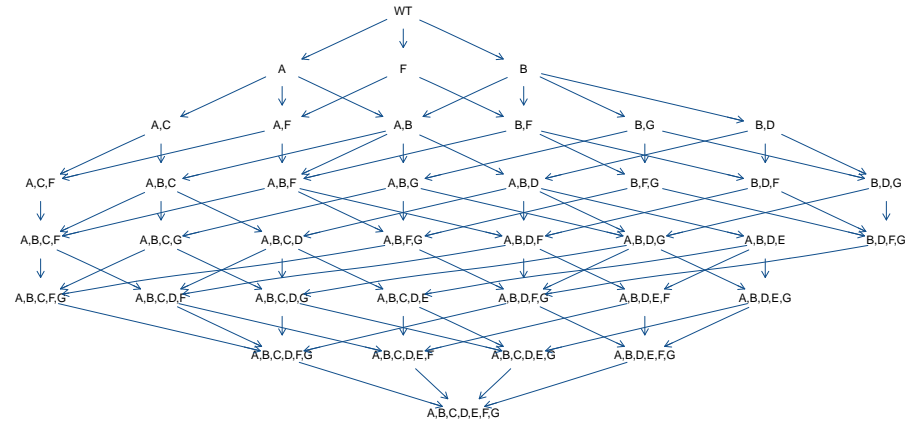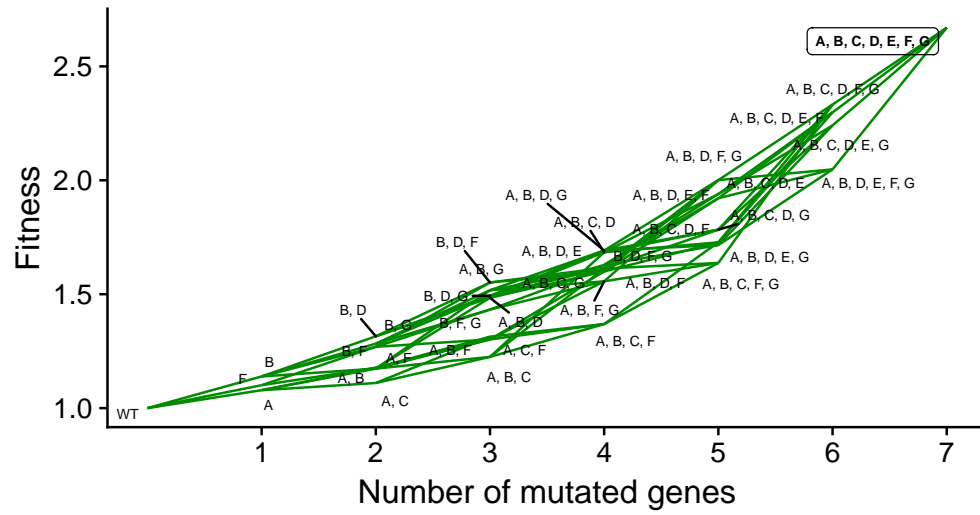



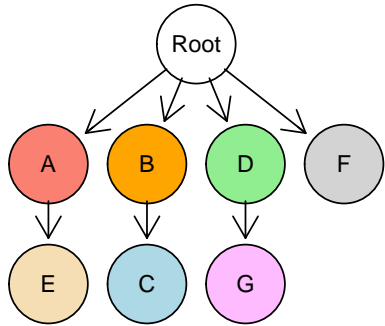

ID 1OIh71InKRui4v2e  
 acc genotypes 54  
 peaks no back 1  
 removed edges 0  
 prop rem edges 0

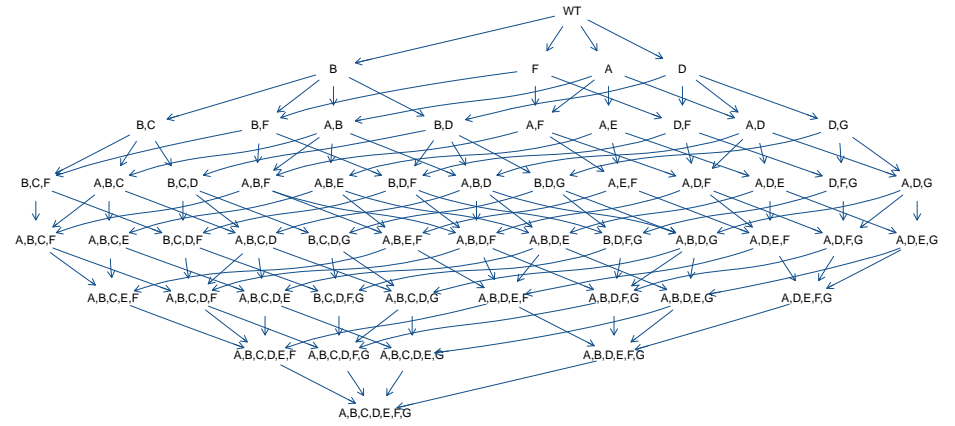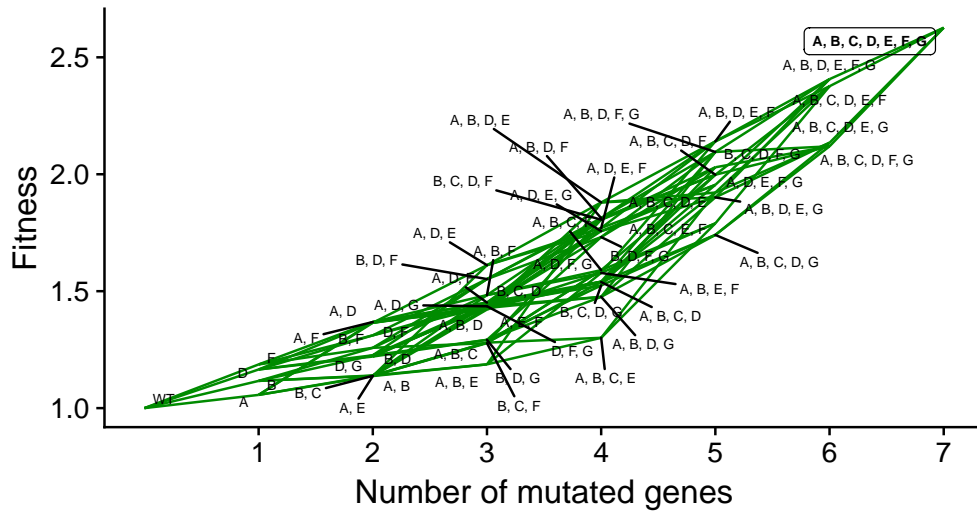

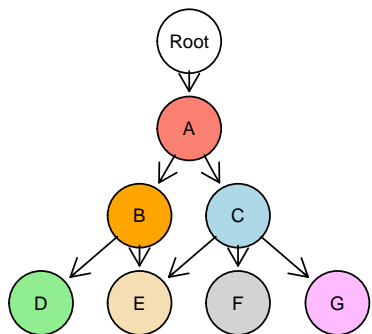

ID 1uosnPLLoevoyoqh  
 acc genotypes 24  
 peaks no back 1  
 removed edges 0  
 prop rem edges 0

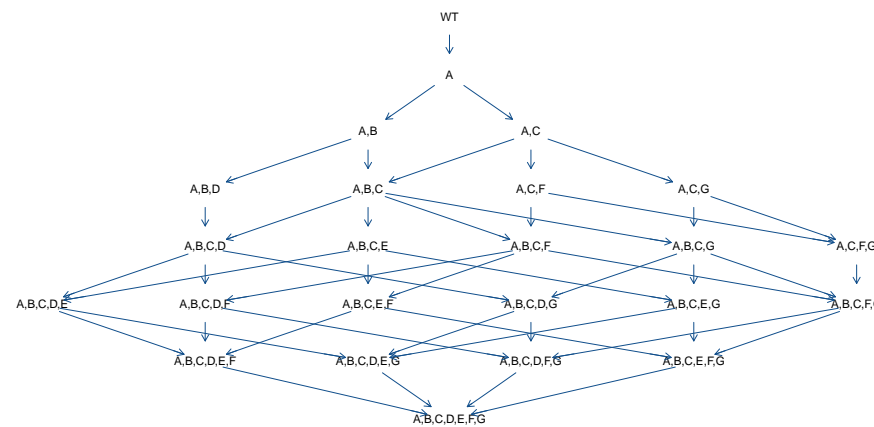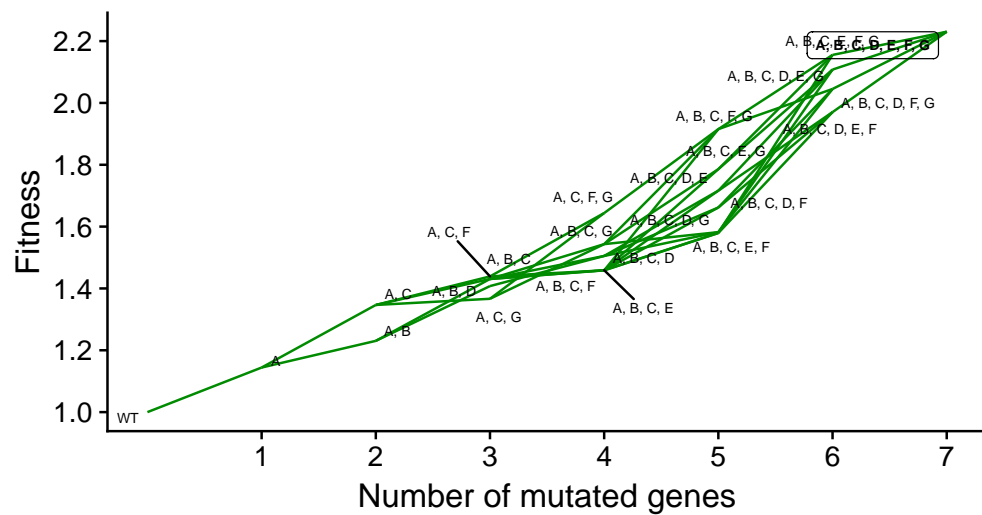

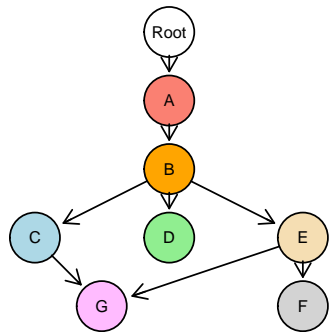

ID 29IH82hKYXw3zuT10  
 acc genotypes 18  
 peaks no back 1  
 removed edges 0  
 prop rem edges 0

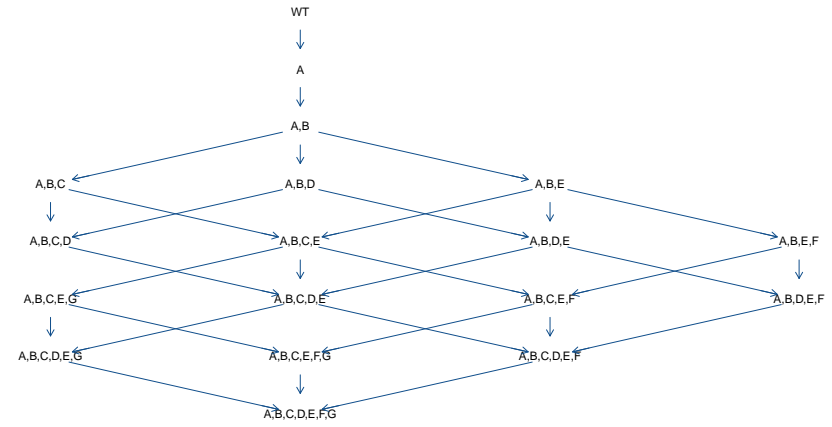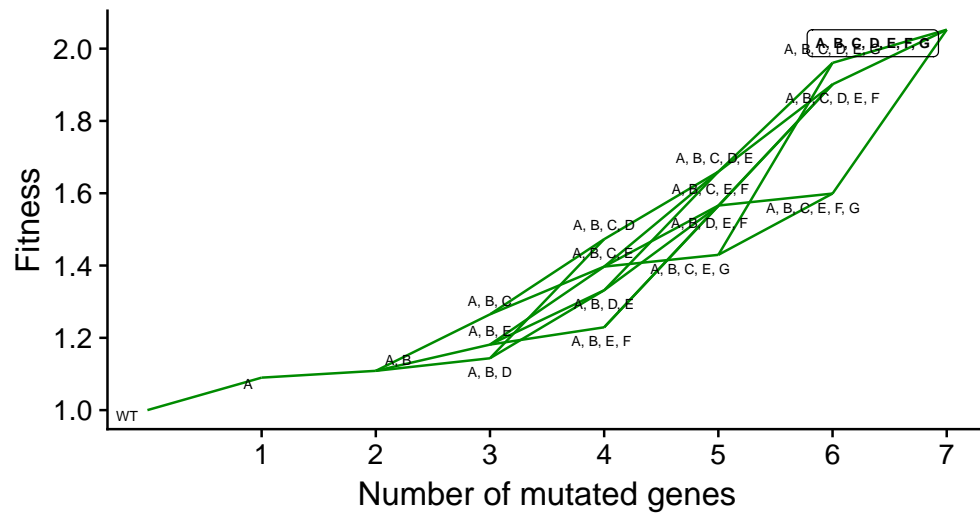

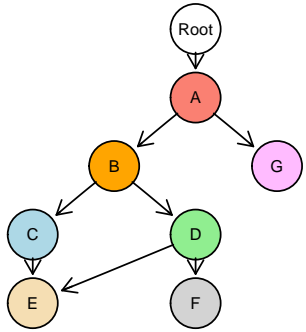

ID 2FyhSdCFo4Nq5dT10  
 acc genotypes 19  
 peaks no back 1  
 removed edges 0  
 prop rem edges 0

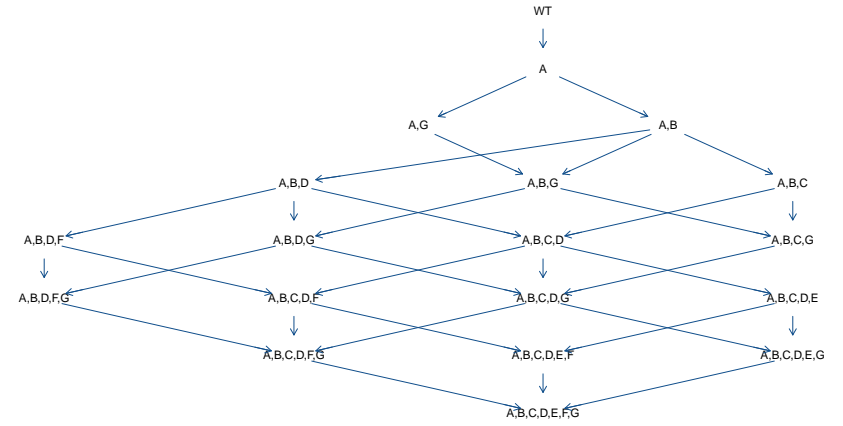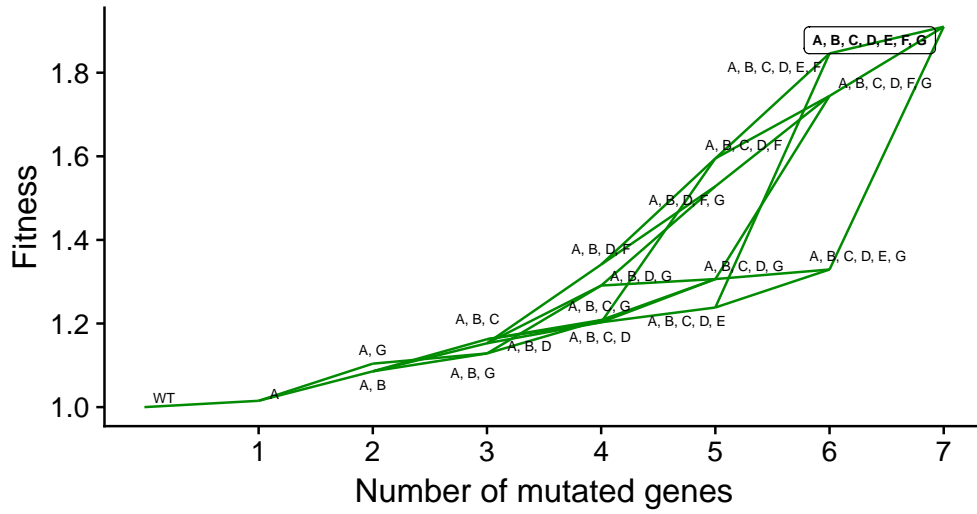

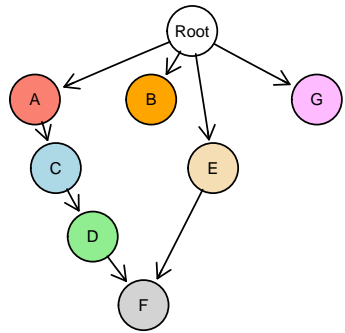

ID 2qPuA9kEjZvpHzWR  
 acc genotypes 36  
 peaks no back 1  
 removed edges 0  
 prop rem edges 0

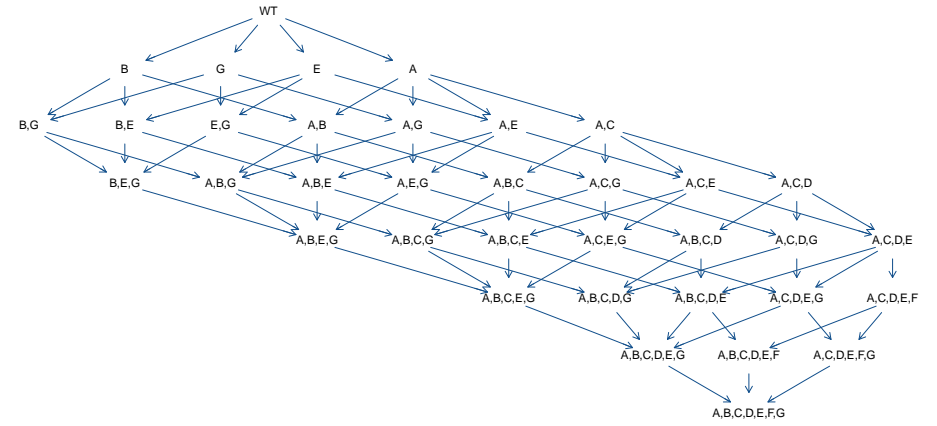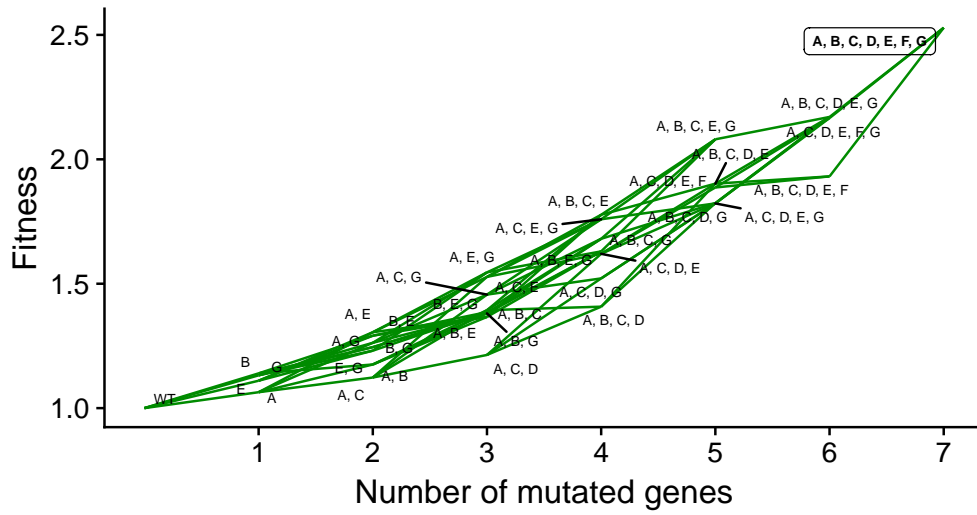

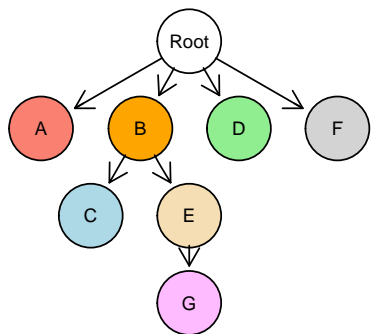

ID **2yfABs8hSv10jftX2**  
 acc genotypes **56**  
 peaks no back 1  
 removed edges 0  
 prop rem edges 0

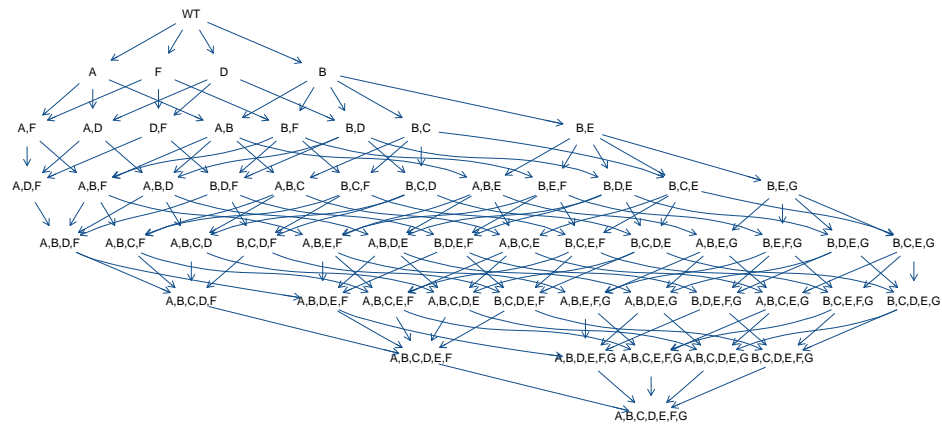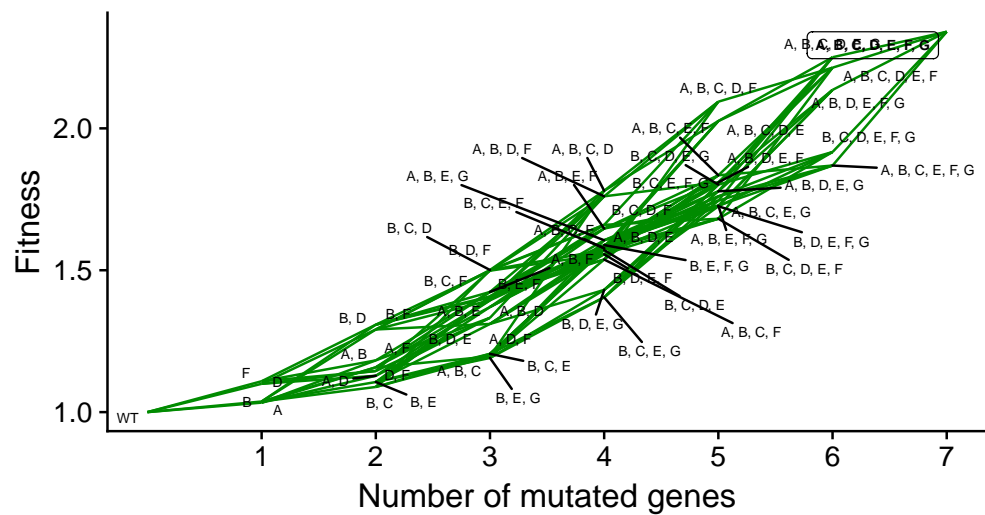



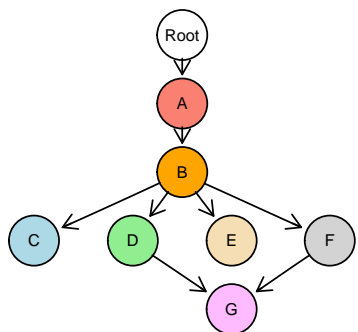

ID [3qyRJOswye1eG84H](#)  
 acc genotypes 22  
 peaks no back 1  
 removed edges 0  
 prop rem edges 0

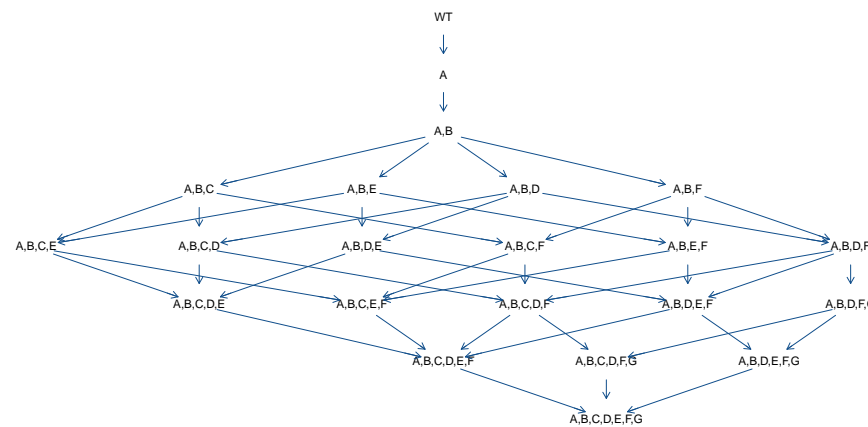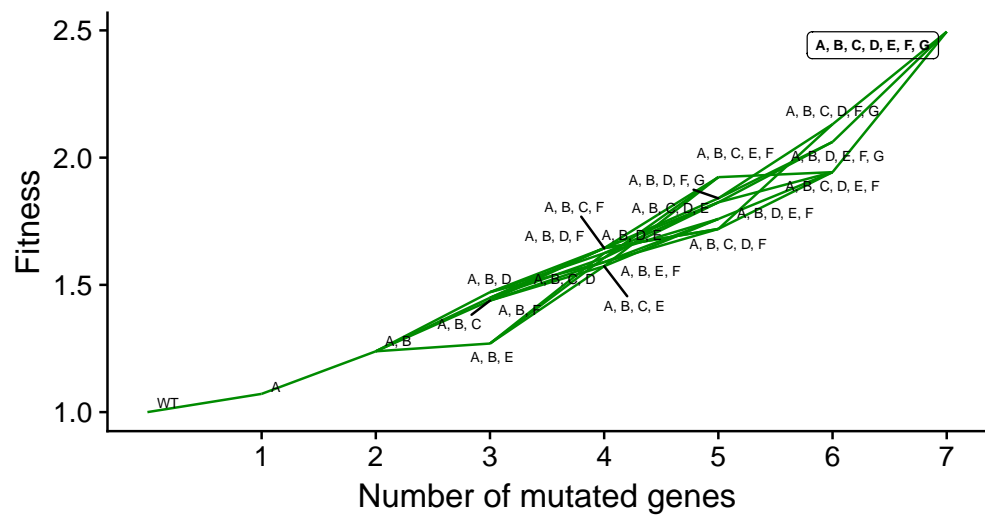



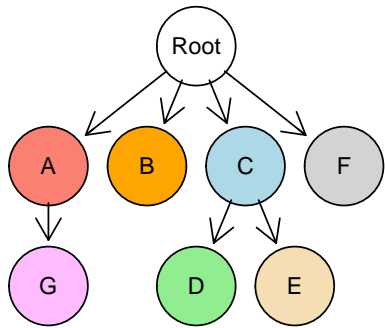

ID 3YPBDYDpA3ERbdMp  
 acc genotypes 60  
 peaks no back 1  
 removed edges 0  
 prop rem edges 0

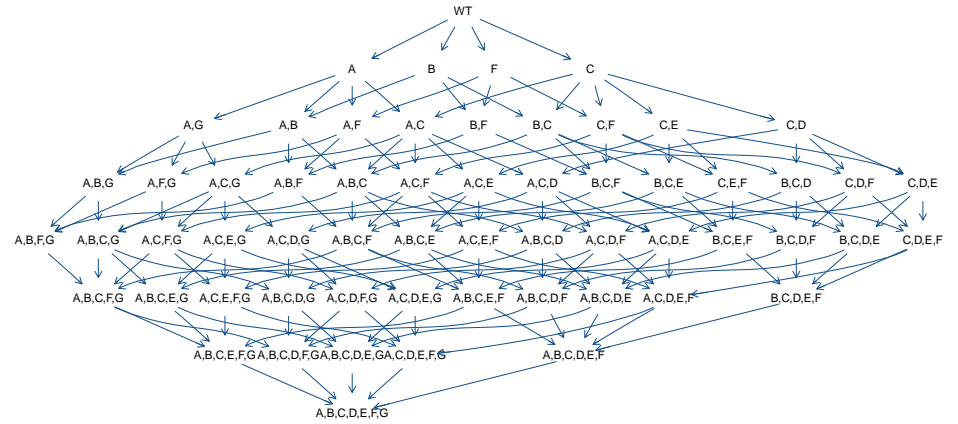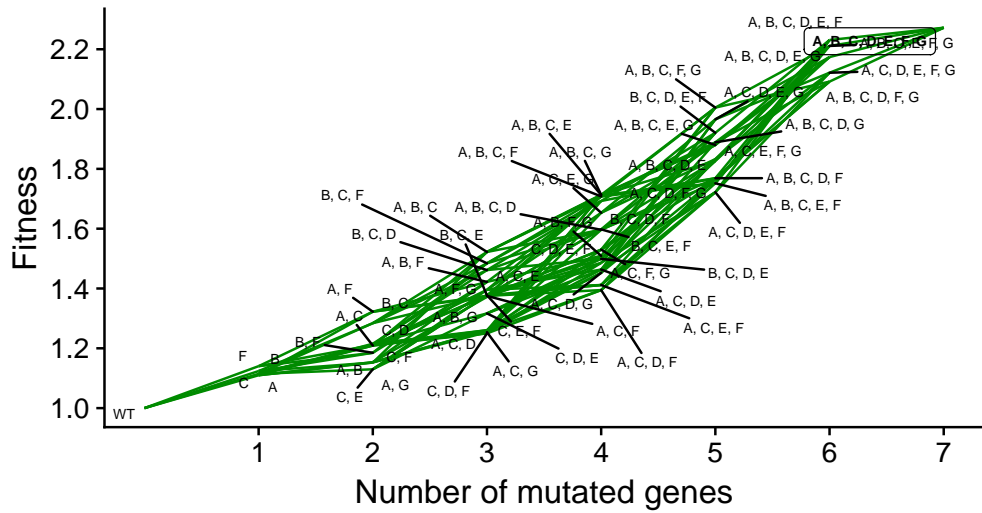

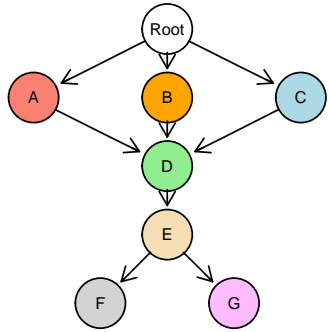

ID 417teASz4uBqj4qQ  
 acc genotypes 13  
 peaks no back 1  
 removed edges 0  
 prop rem edges 0

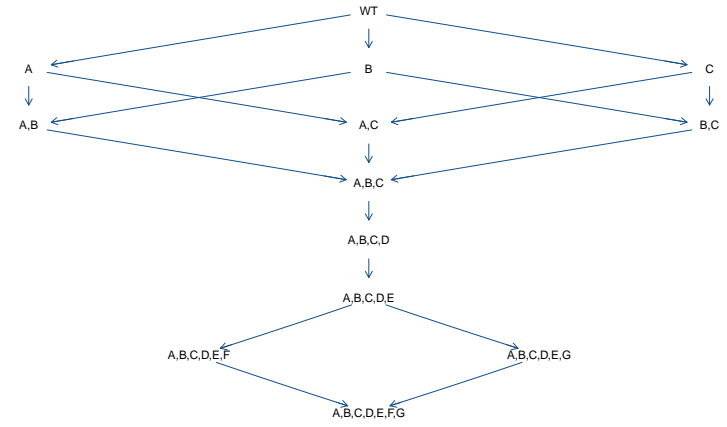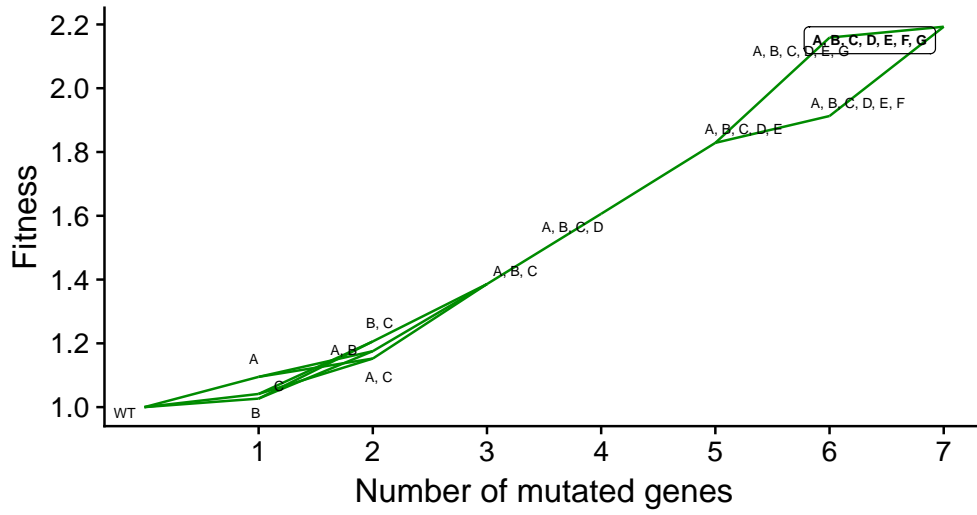

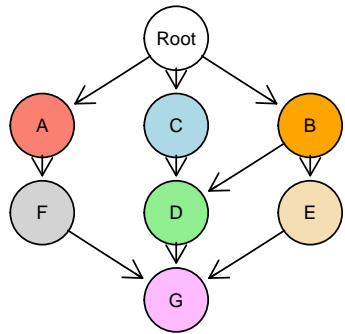

ID 46rFIBbA10BhomWGN  
 acc genotypes 25  
 peaks no back 1  
 removed edges 0  
 prop rem edges 0

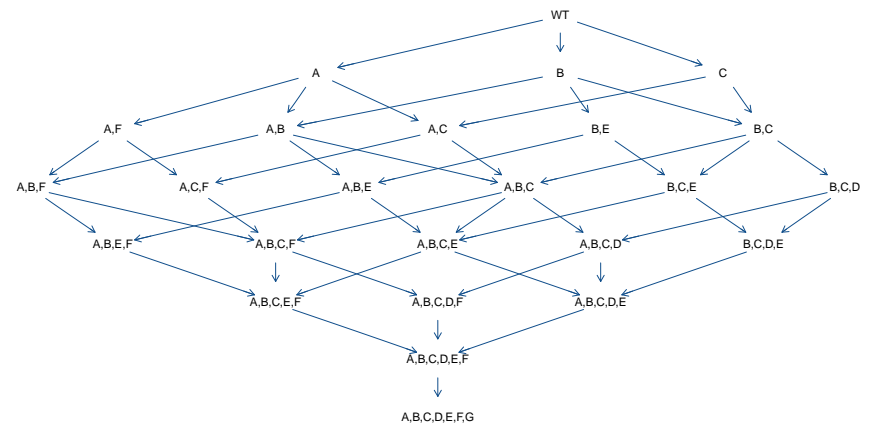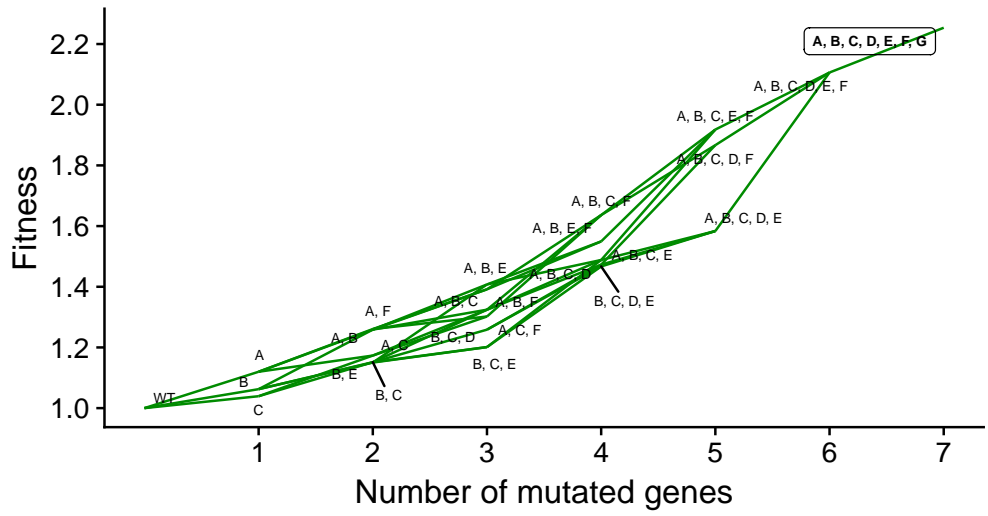

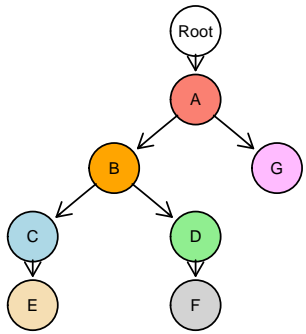

ID 4mouIGQselPBUfsX  
 acc genotypes 21  
 peaks no back 1  
 removed edges 0  
 prop rem edges 0

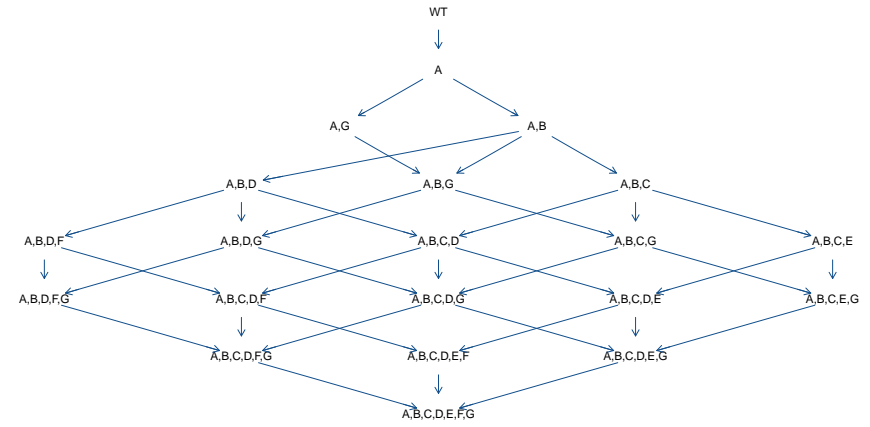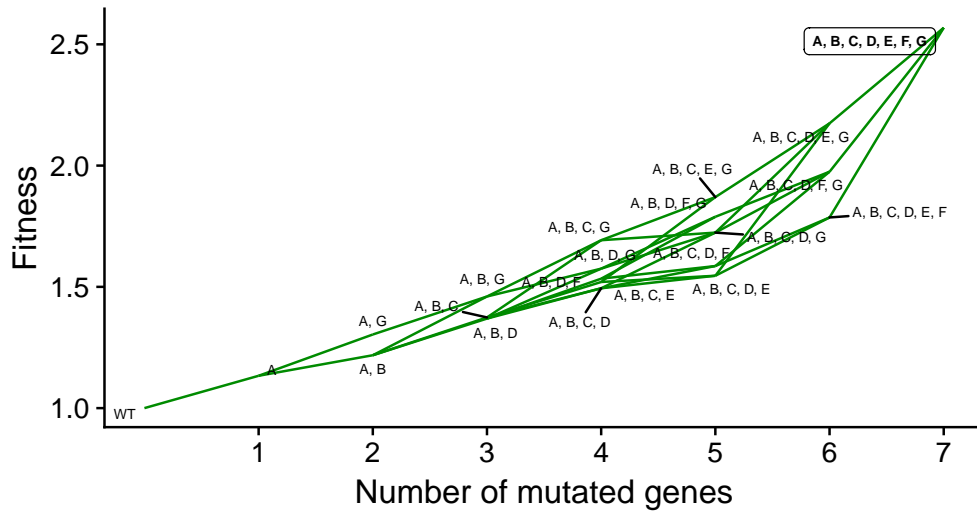

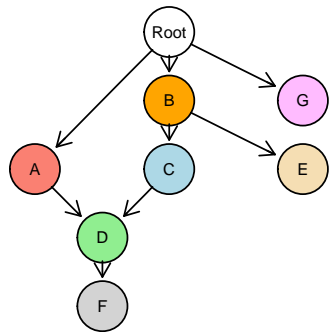

ID 4RoAEsprOB10Yv3U6  
 acc genotypes 28  
 peaks no back 1  
 removed edges 0  
 prop rem edges 0

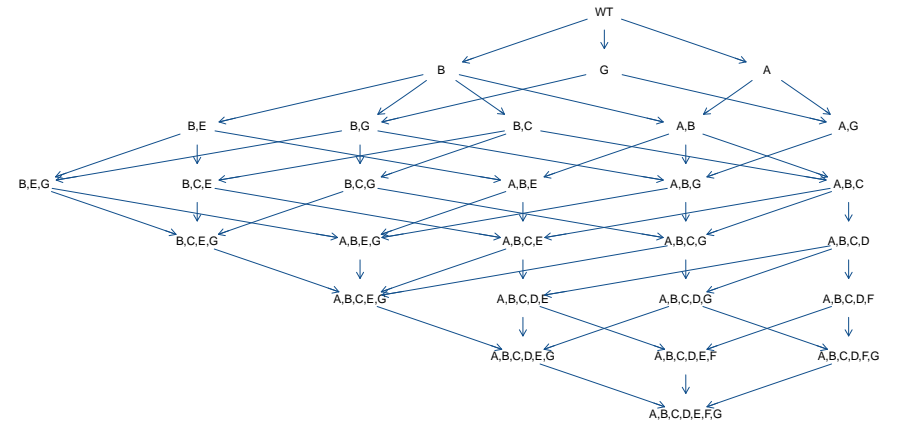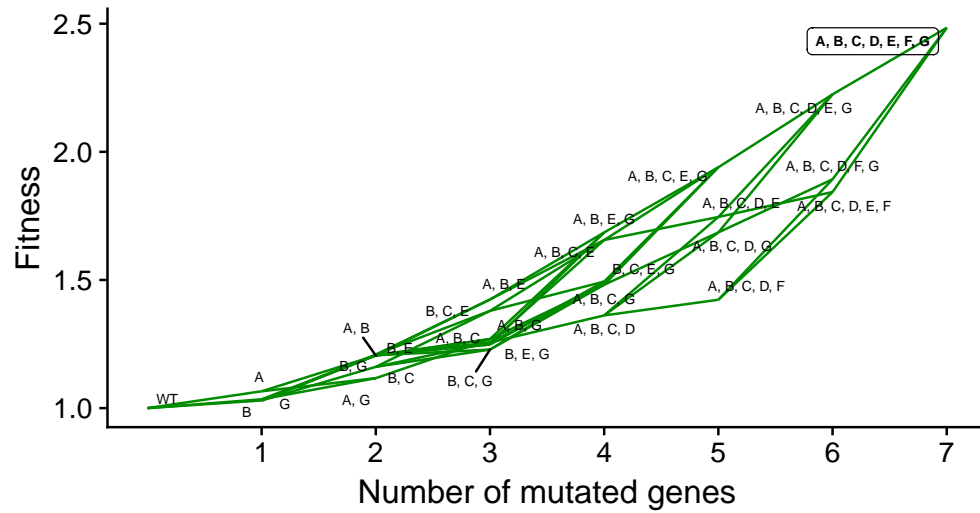

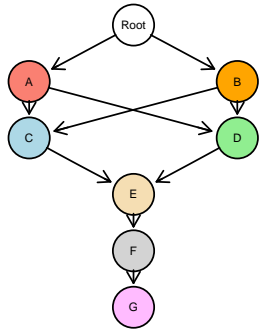

ID 4yUgivyZl1UgonSqo  
 acc genotypes 10  
 peaks no back 1  
 removed edges 0  
 prop rem edges 0

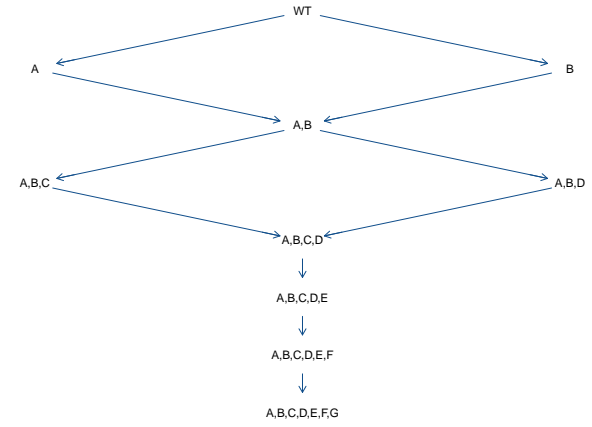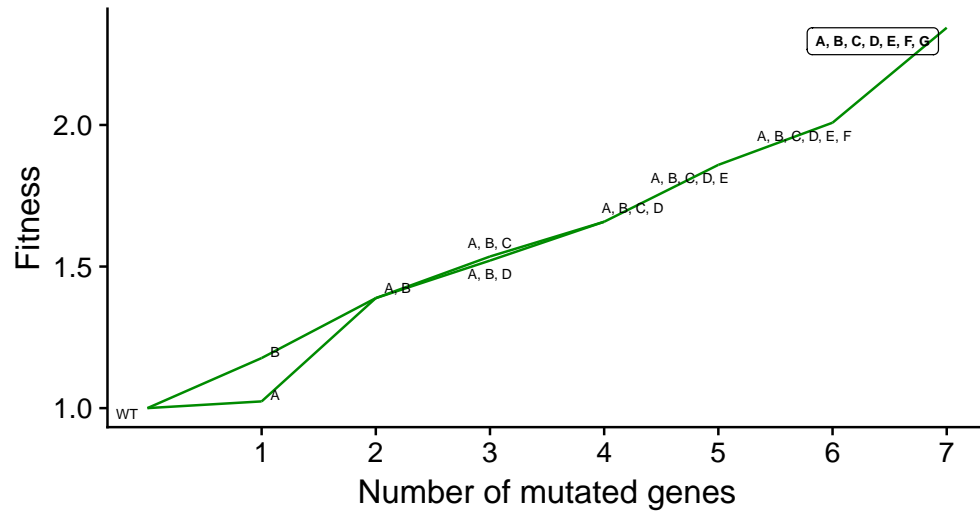

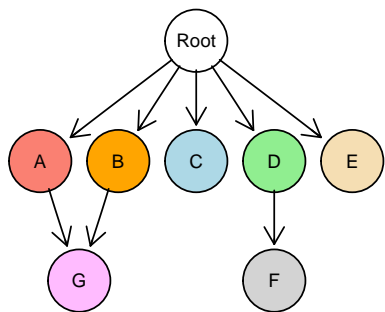

ID 5fz101Z59qlyO10Rxn  
 acc genotypes 60  
 peaks no back 1  
 removed edges 0  
 prop rem edges 0

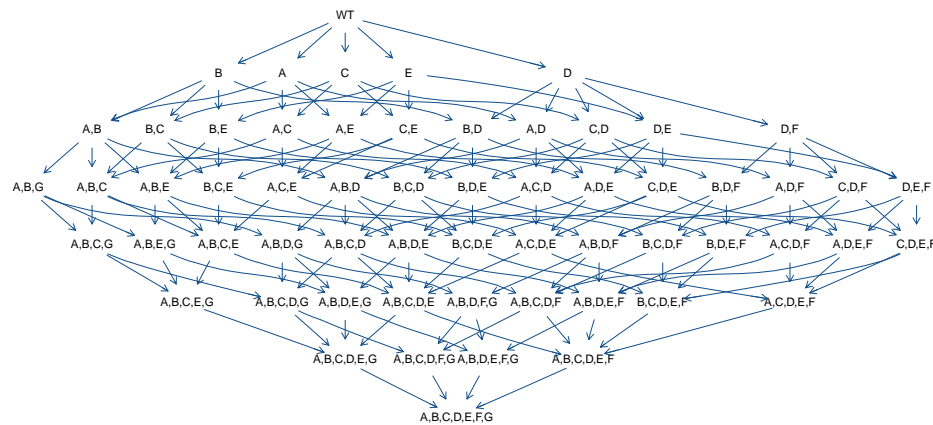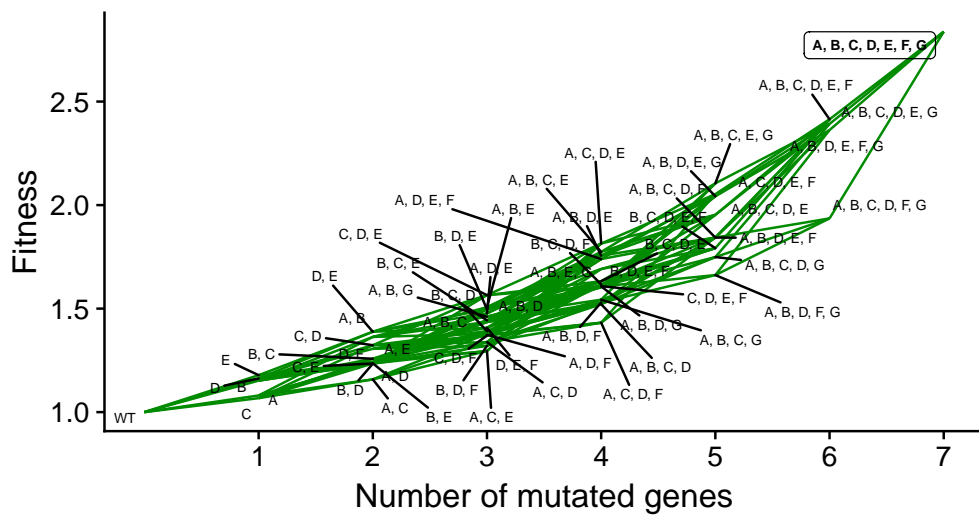

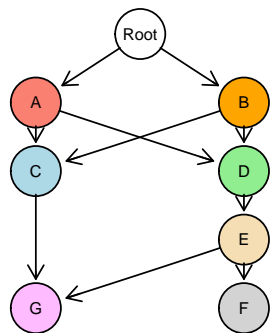

ID 6pjAHfBKJ10Ocigjg  
 acc genotypes 13  
 peaks no back 1  
 removed edges 0  
 prop rem edges 0

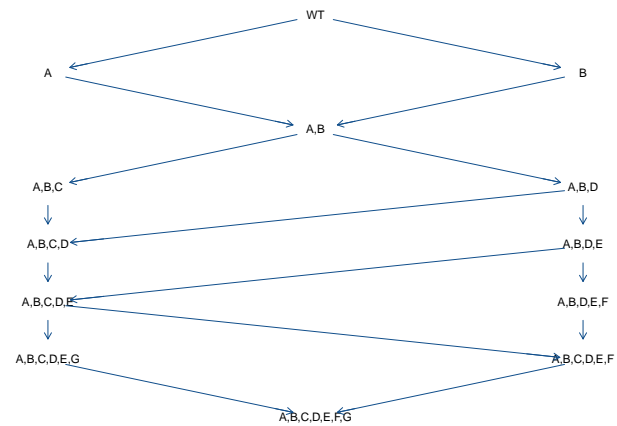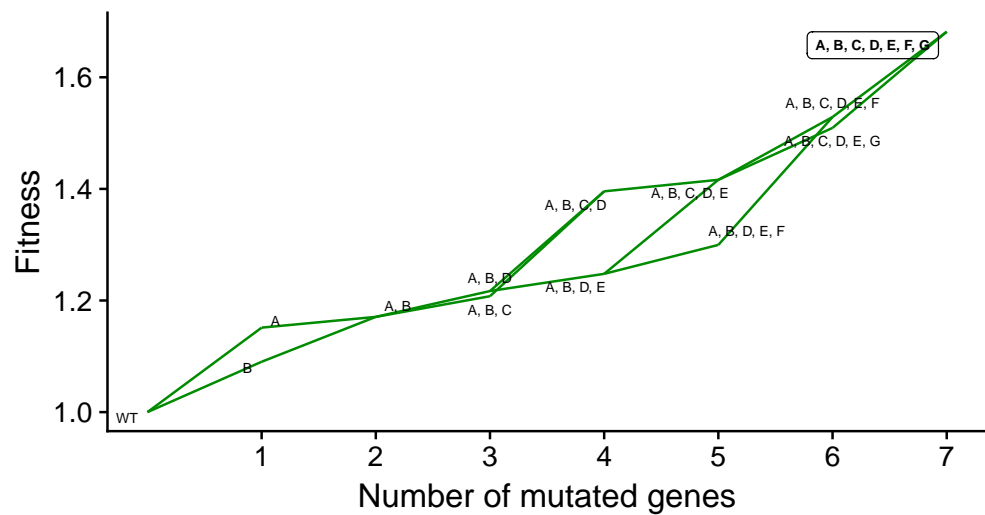



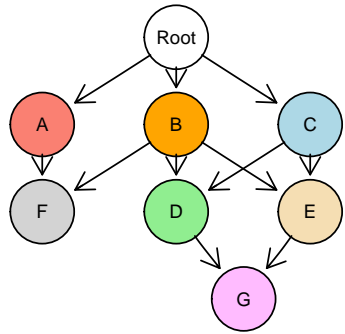

ID 718HviJL2vTZgZyJ  
 acc genotypes 22  
 peaks no back 1  
 removed edges 0  
 prop rem edges 0

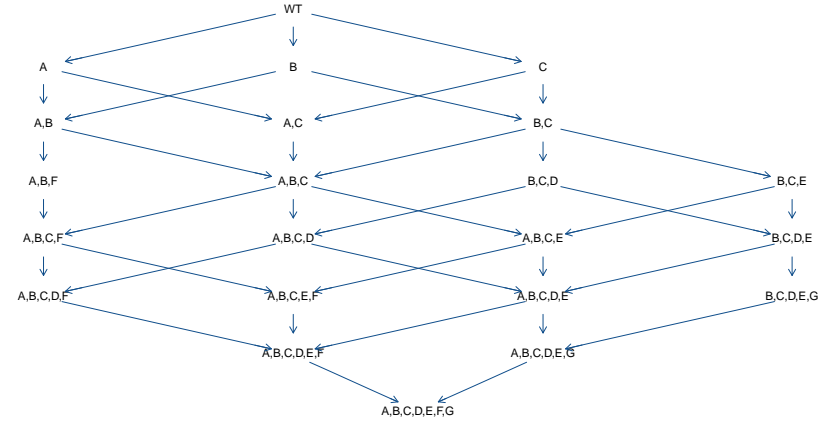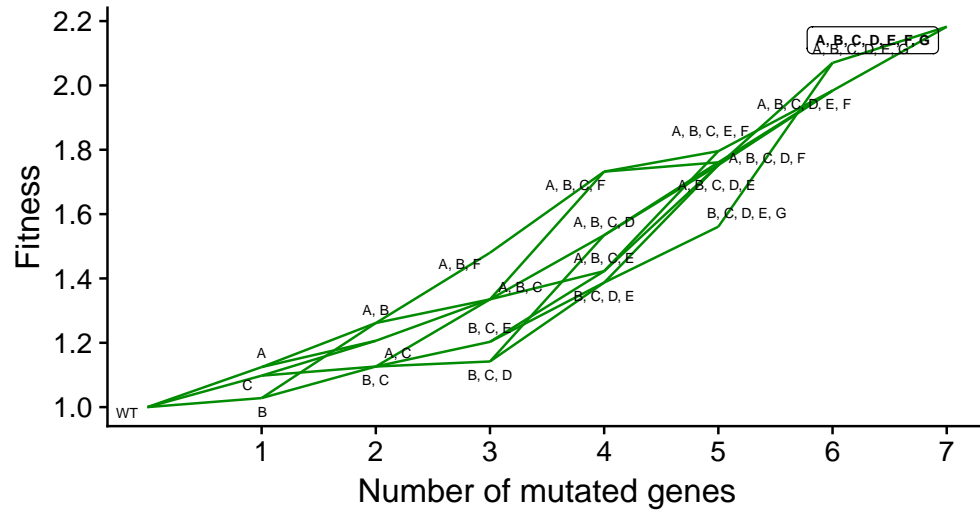

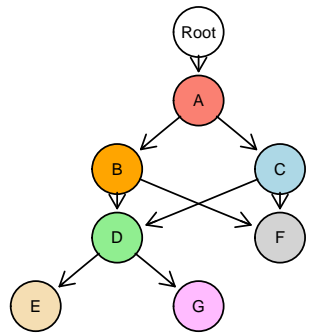

ID 7GFrRtiQ5Cyt3w8k  
 acc genotypes 14  
 peaks no back 1  
 removed edges 0  
 prop rem edges 0

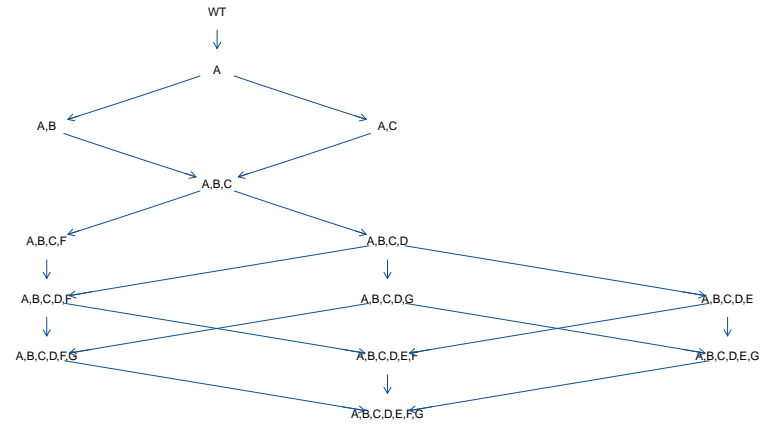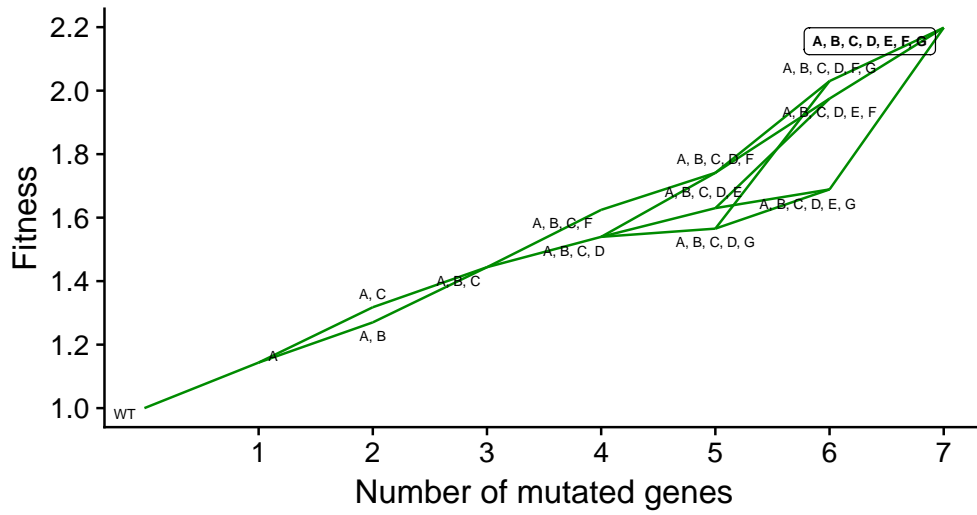

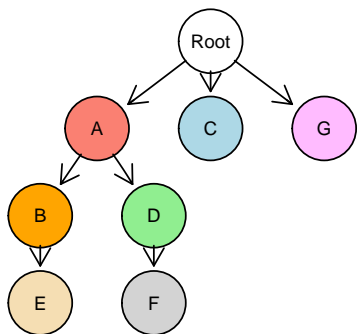

ID 7O6M3PSFd6vylCJi  
 acc genotypes 40  
 peaks no back 1  
 removed edges 0  
 prop rem edges 0

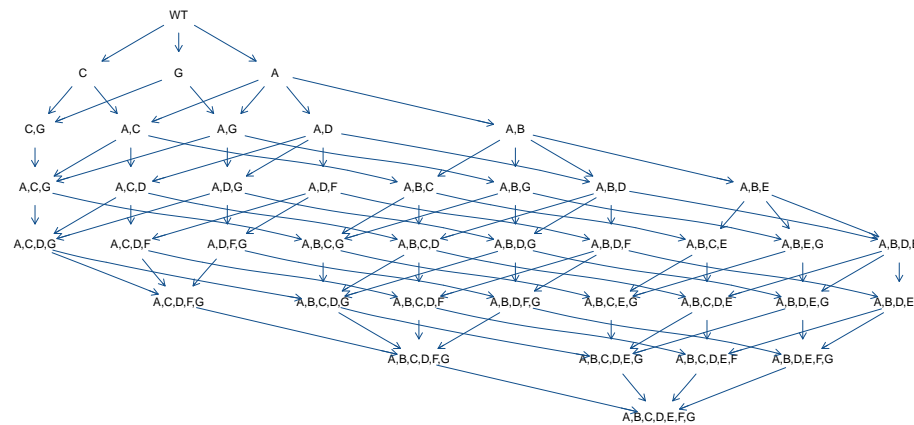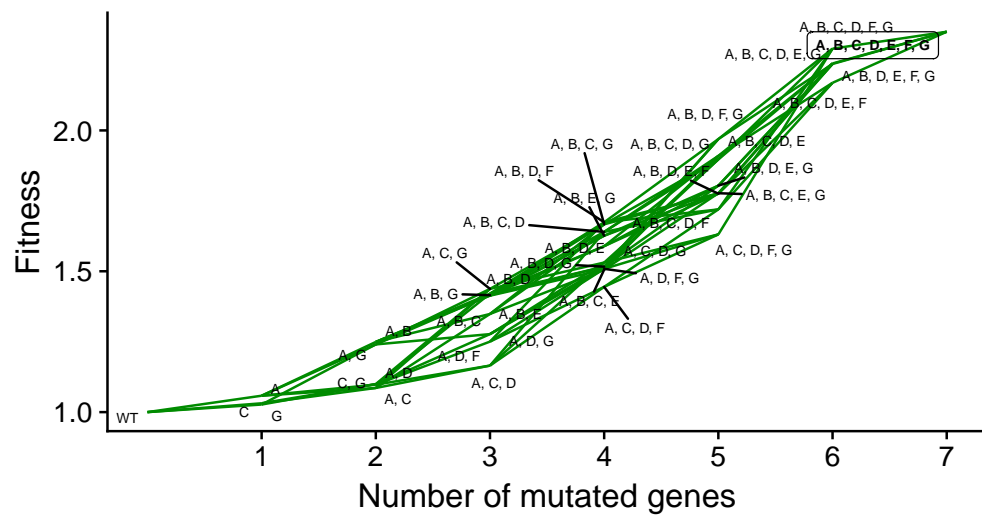

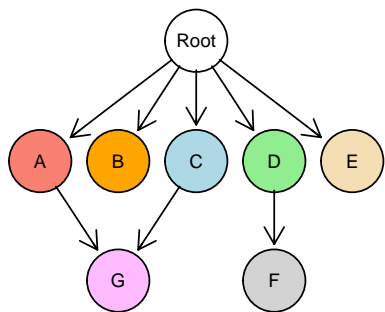

ID 8GEzhn1FLKorAfUm  
 acc genotypes 60  
 peaks no back 1  
 removed edges 0  
 prop rem edges 0

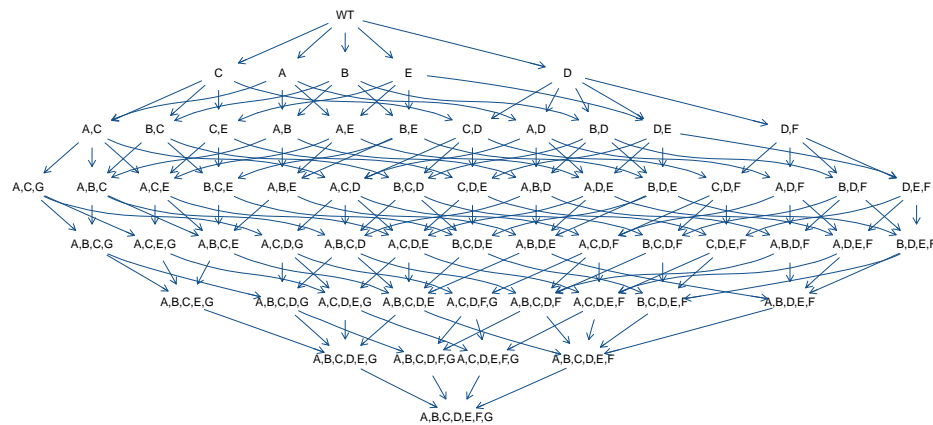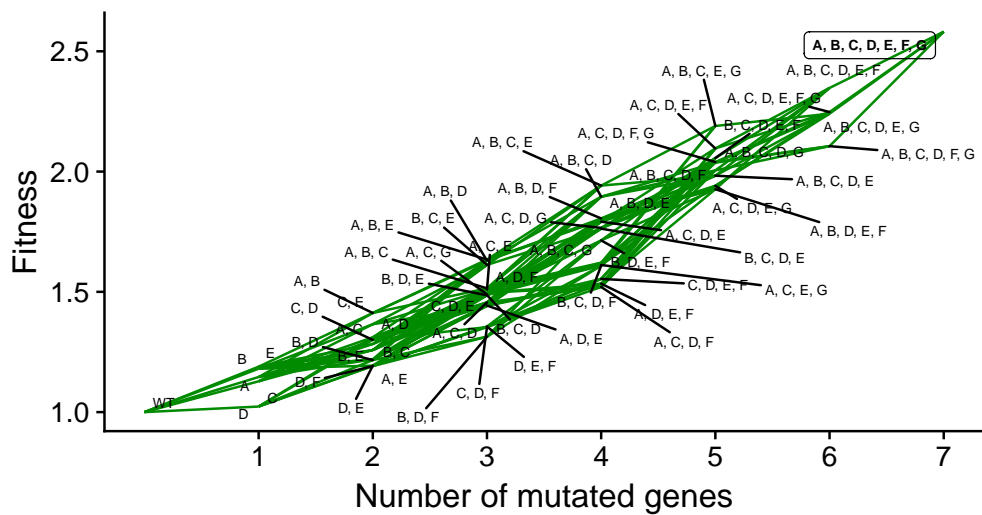



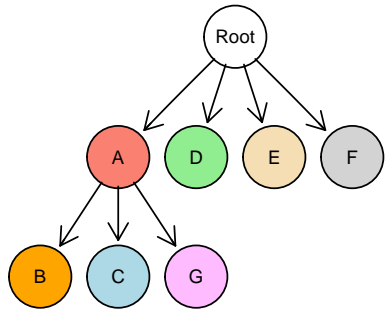

ID 8Zr6qLC9yn9cyhAY  
 acc genotypes 72  
 peaks no back 1  
 removed edges 0  
 prop rem edges 0

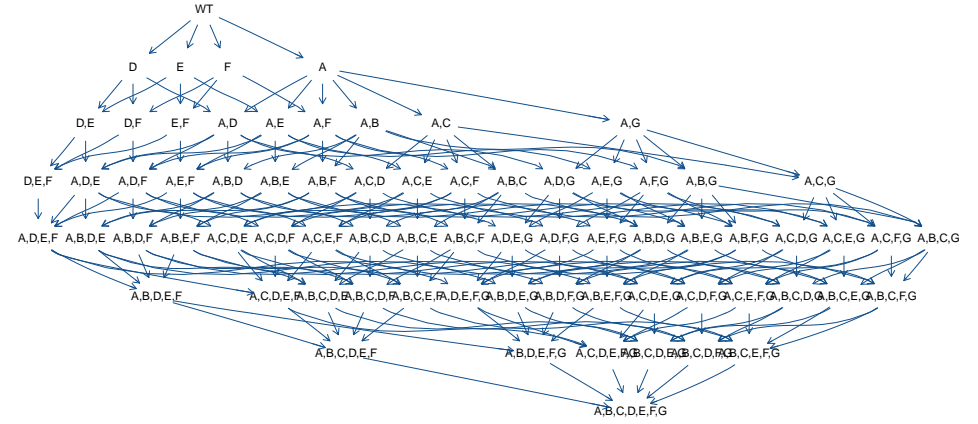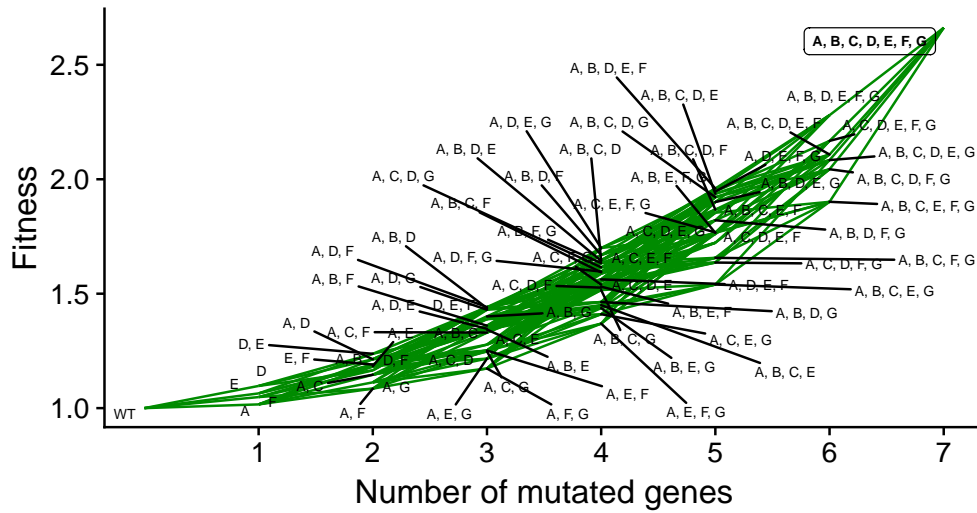

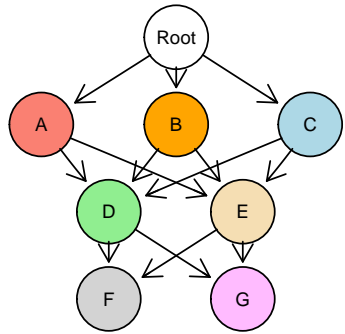

ID 9o10QUimqcWrPHbGH  
 acc genotypes 14  
 peaks no back 1  
 removed edges 0  
 prop rem edges 0

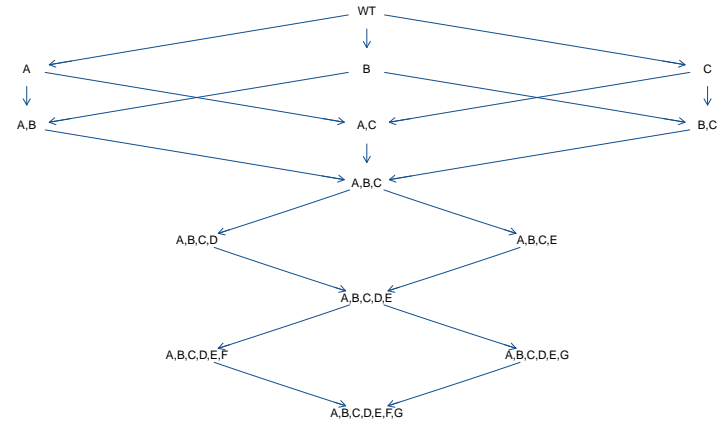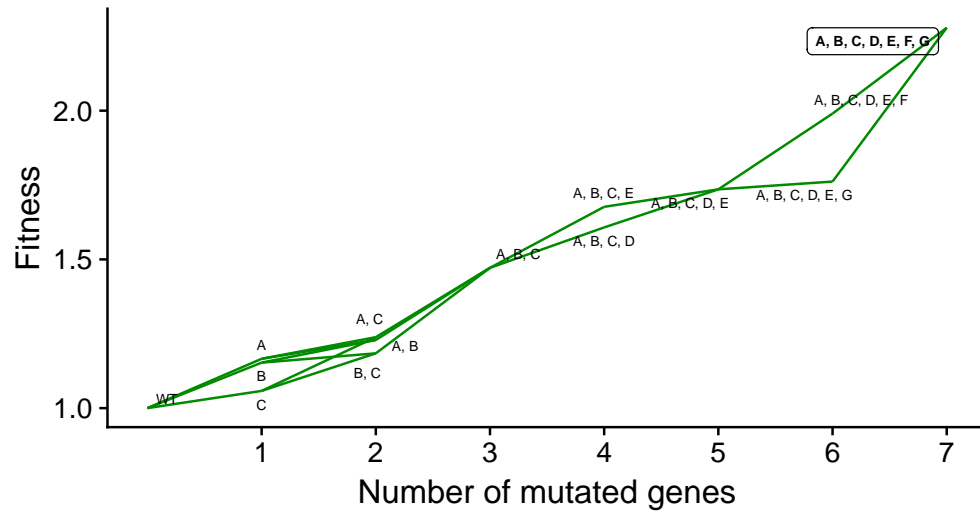

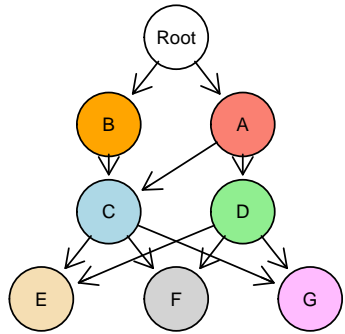

ID a2tStlNqtyWzD10eQ  
 acc genotypes 15  
 peaks no back 1  
 removed edges 0  
 prop rem edges 0

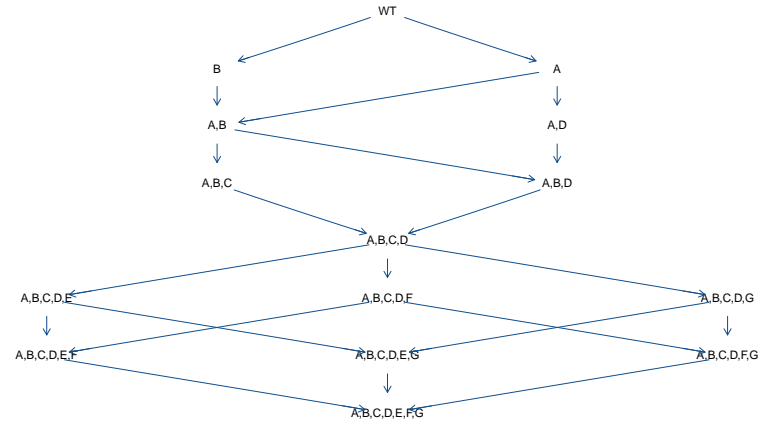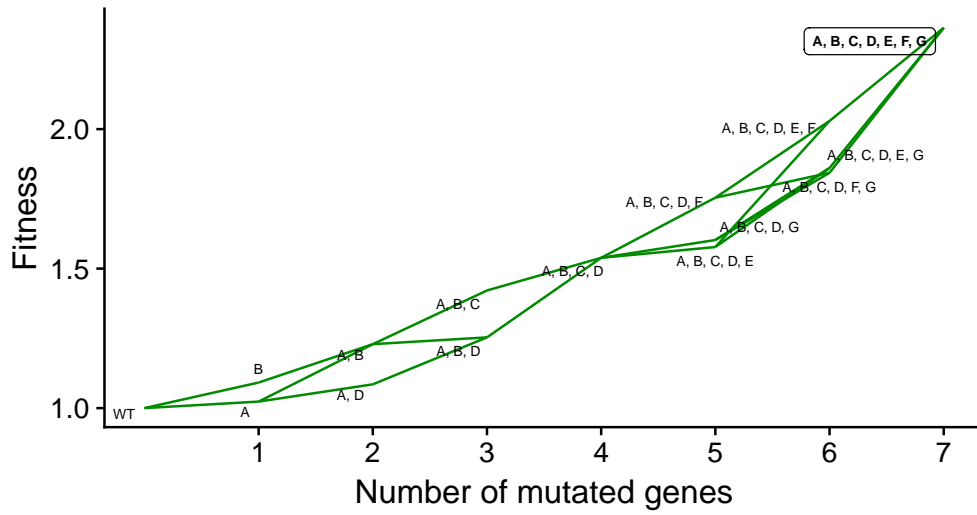



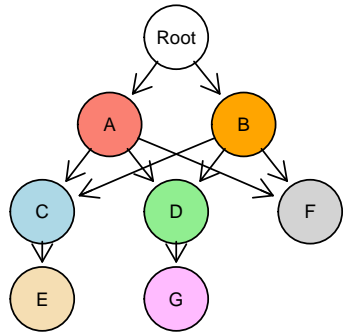

ID [a7XZXptDjjWuSFhl](#)  
 acc genotypes 21  
 peaks no back 1  
 removed edges 0  
 prop rem edges 0

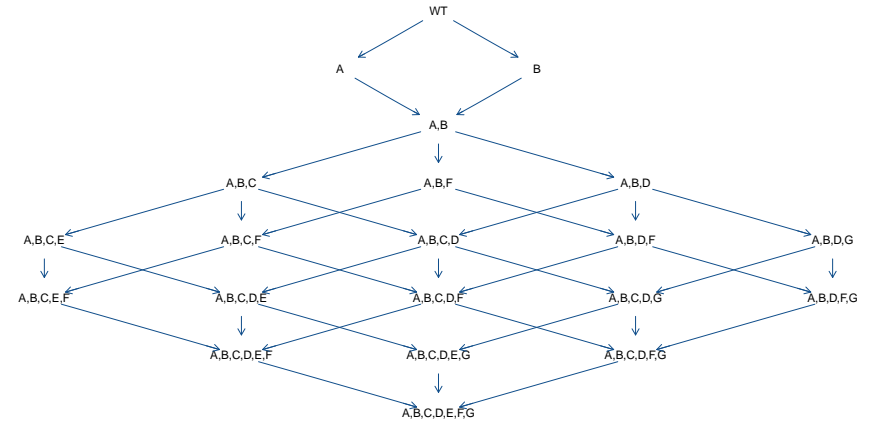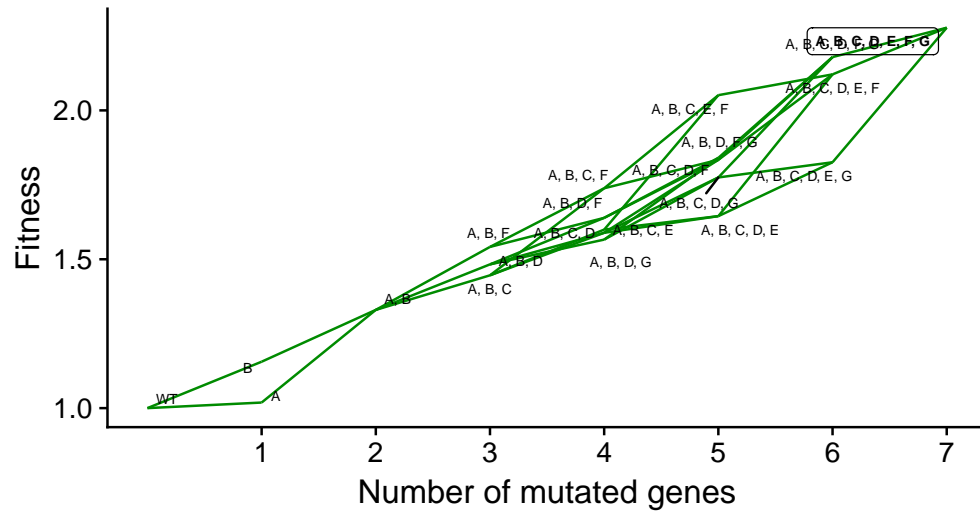

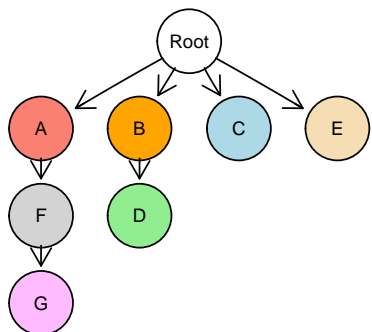

ID aGBVZkIQ4oOGxWTb  
 acc genotypes 48  
 peaks no back 1  
 removed edges 0  
 prop rem edges 0

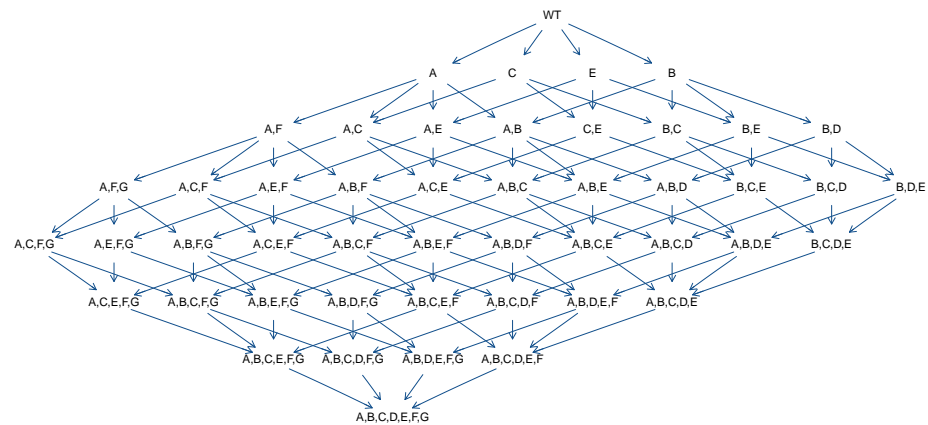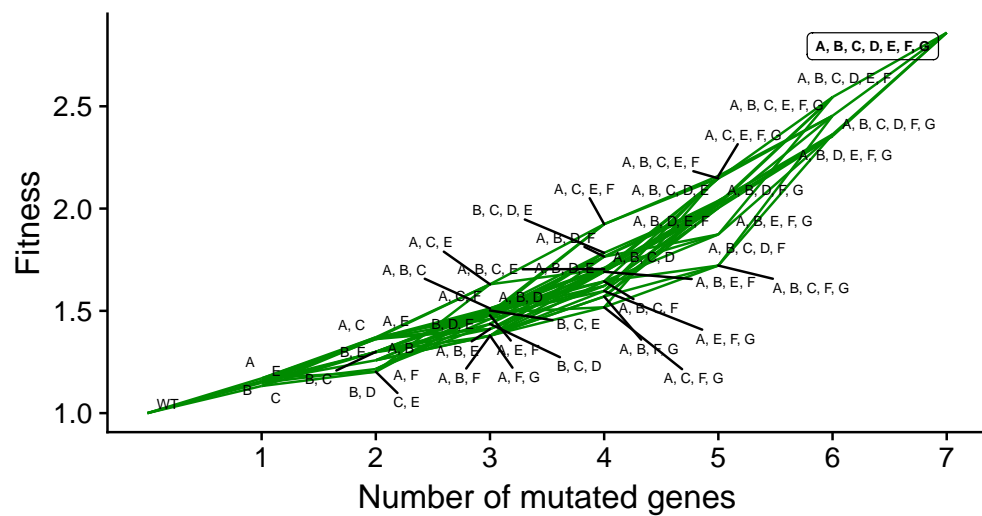

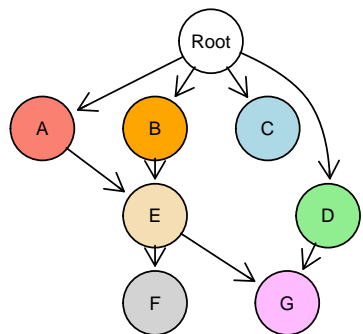

ID AIBDGRuJ29dXk10wK  
 acc genotypes 28  
 peaks no back 1  
 removed edges 0  
 prop rem edges 0

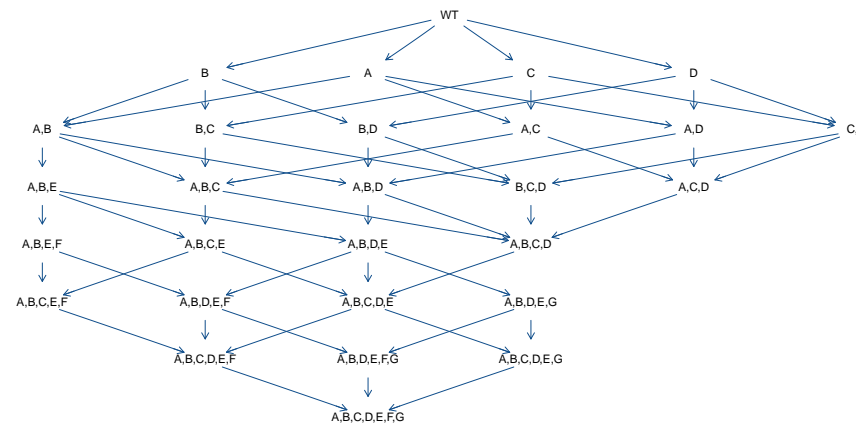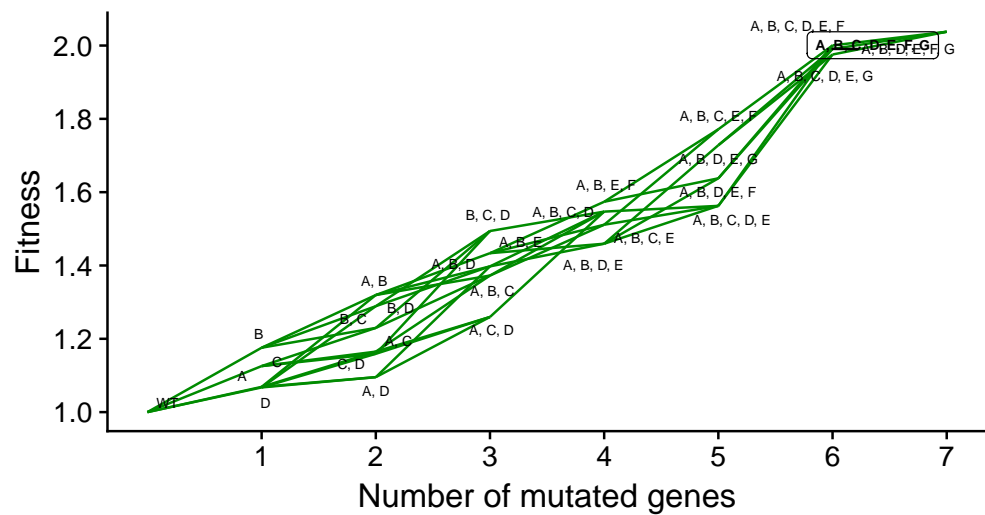

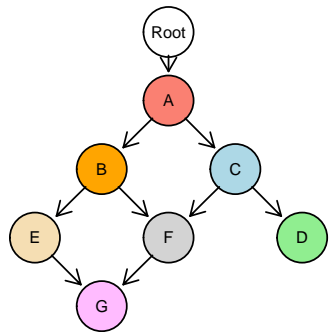

ID [ALtLgLoV6JFZgc9s](#)  
 acc genotypes 16  
 peaks no back 1  
 removed edges 0  
 prop rem edges 0

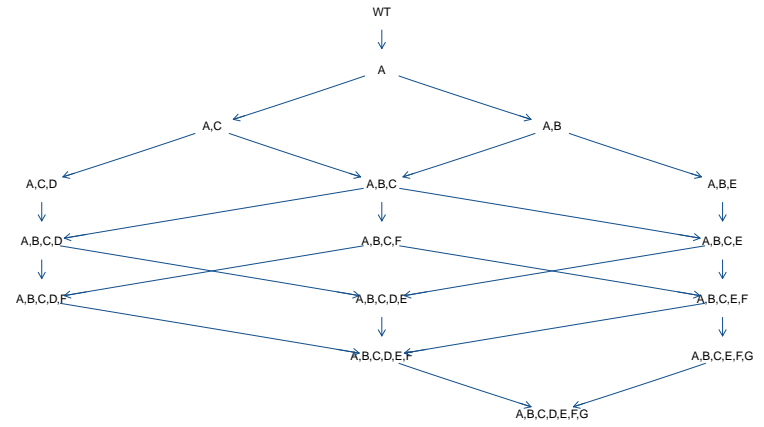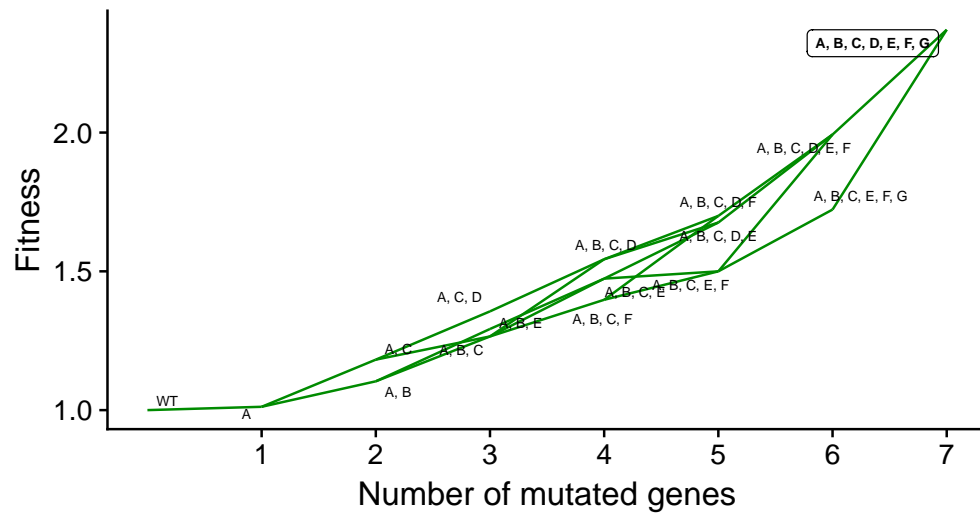

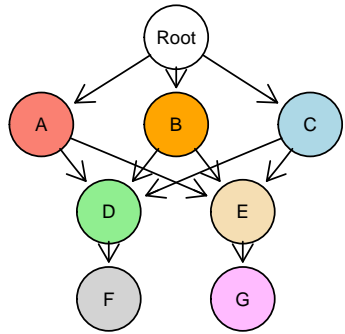

ID **AomkJD2bjXifY6bL**  
 acc genotypes **16**  
 peaks no back 1  
 removed edges 0  
 prop rem edges 0

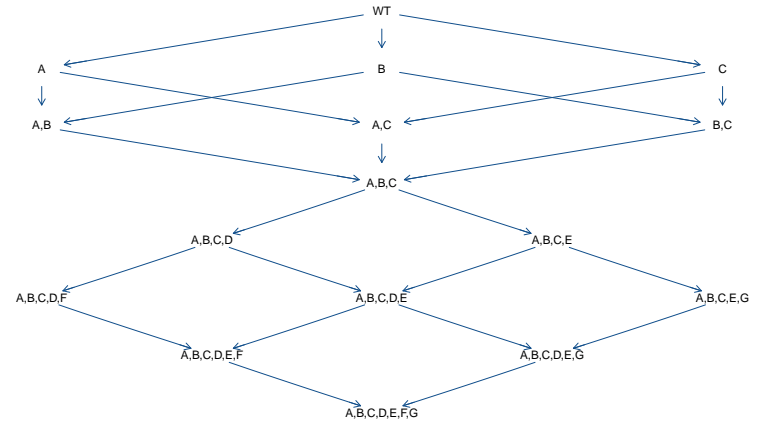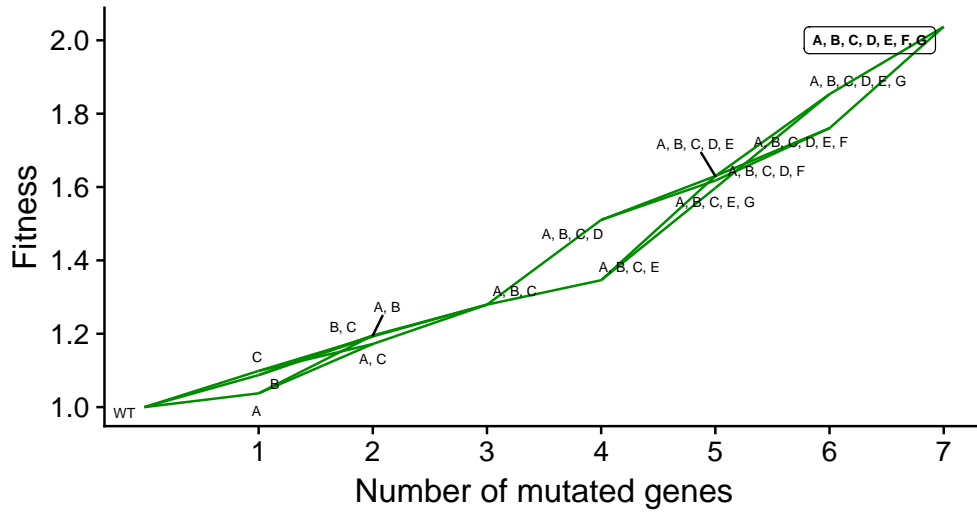

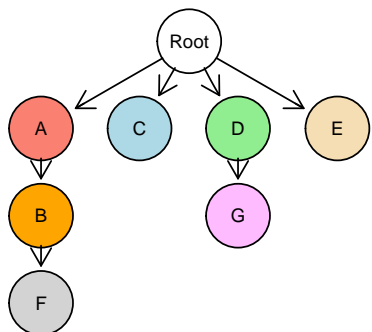

ID **AQcGRsclzSVWoU7Z**  
 acc genotypes **48**  
 peaks no back 1  
 removed edges 0  
 prop rem edges 0

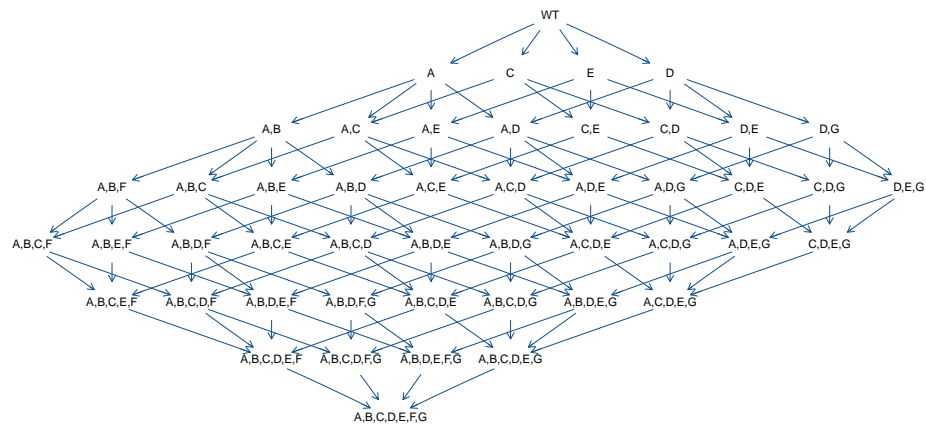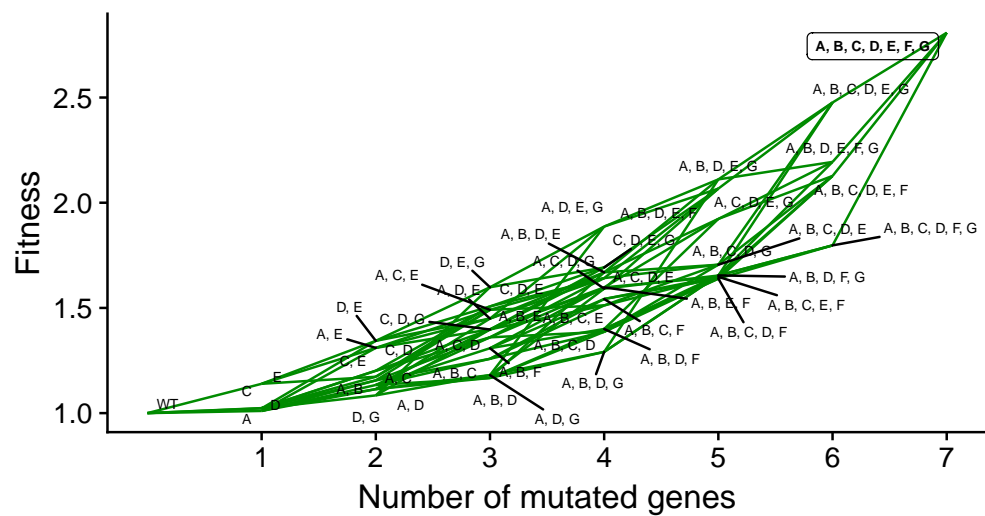

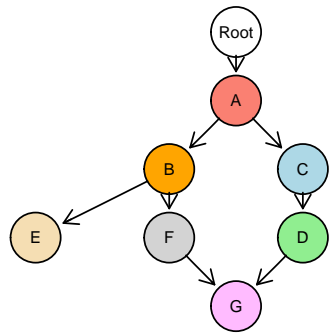

ID Azj8j6q13euWbW53  
 acc genotypes 18  
 peaks no back 1  
 removed edges 0  
 prop rem edges 0

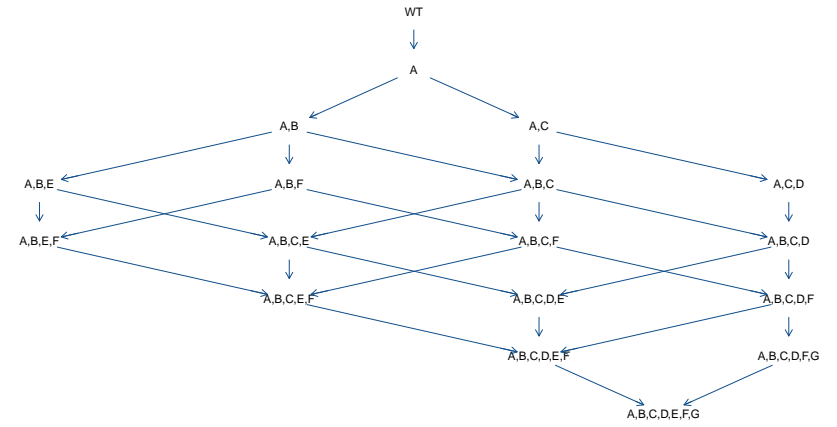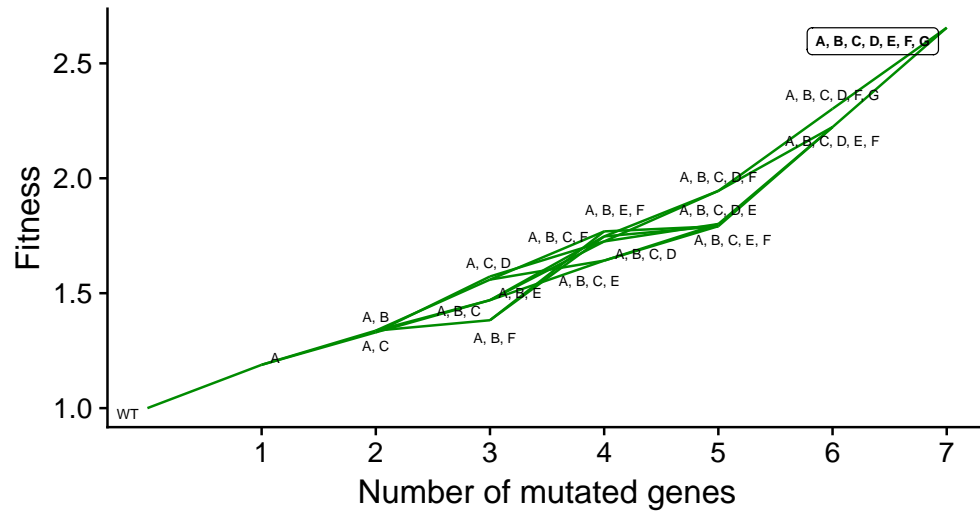

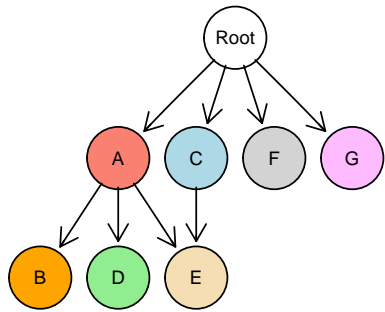

ID **B3I8D10NQwXKC9sLs**  
 acc genotypes **56**  
 peaks no back **1**  
 removed edges **0**  
 prop rem edges **0**

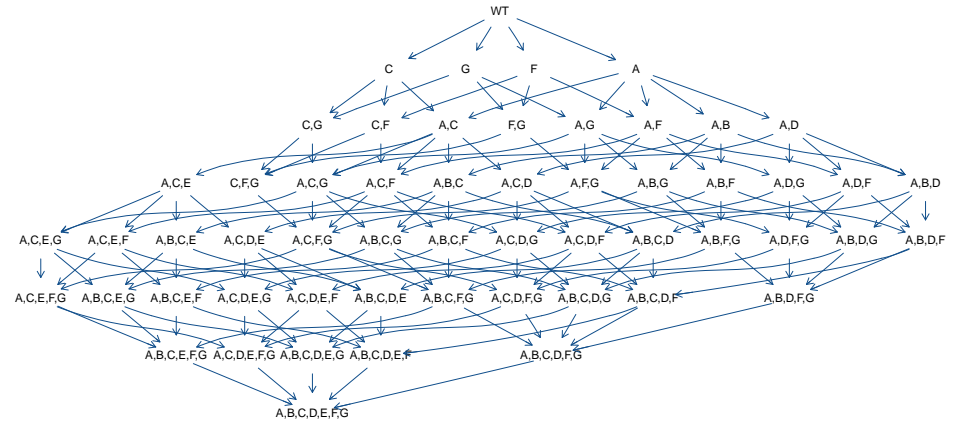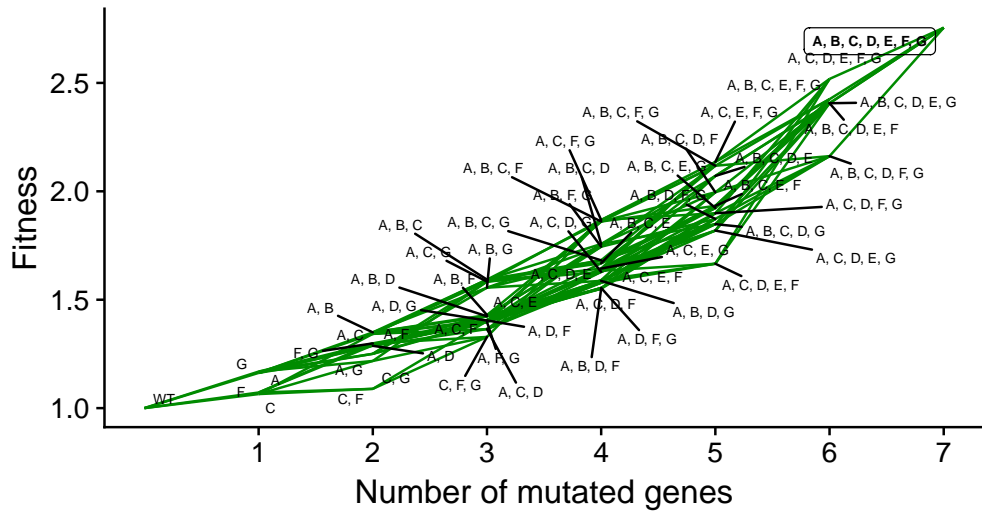



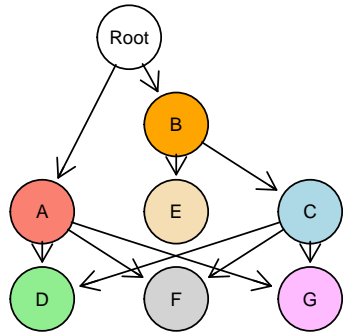

ID **BawvXOS7sG8kOijC**  
*acc genotypes* **24**  
*peaks no back* 1  
*removed edges* 0  
*prop rem edges* 0

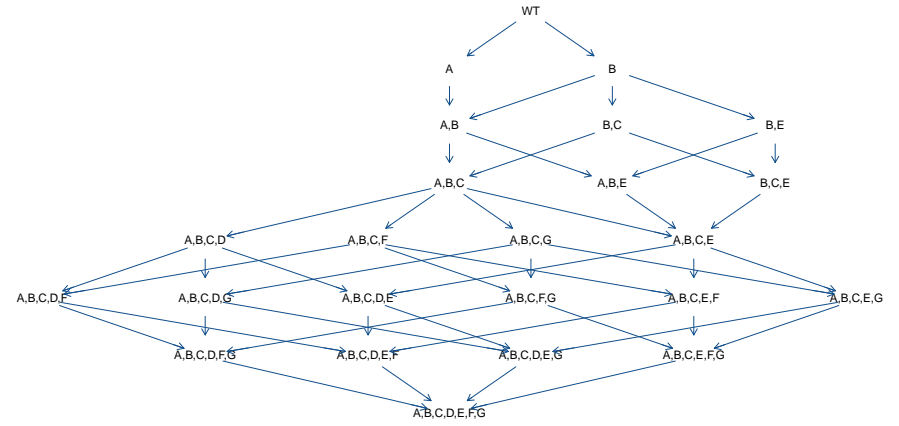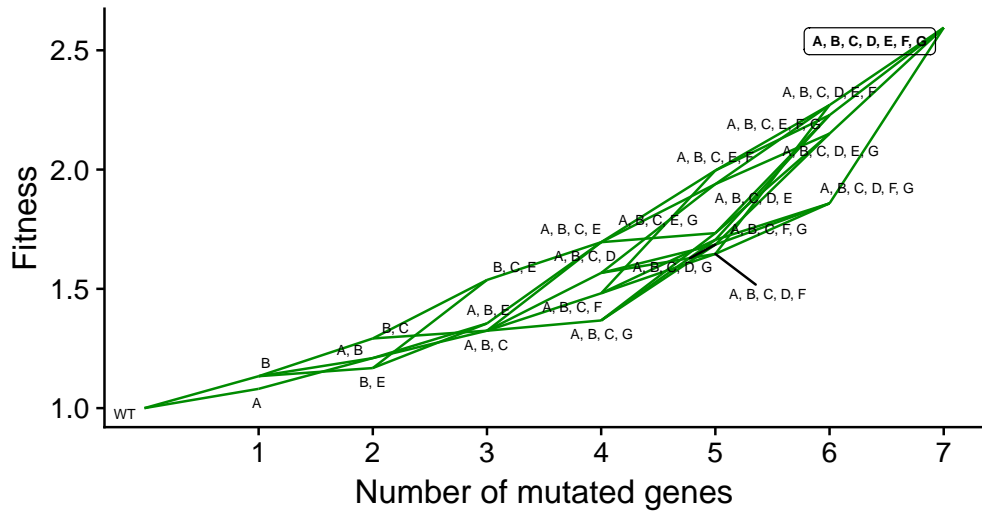

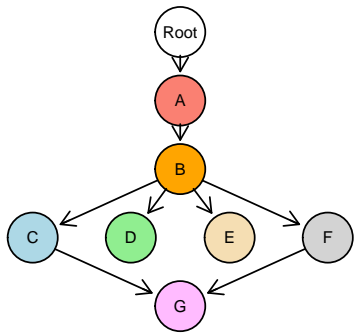

ID BFEIrfle1os3fm18  
 acc genotypes 22  
 peaks no back 1  
 removed edges 0  
 prop rem edges 0

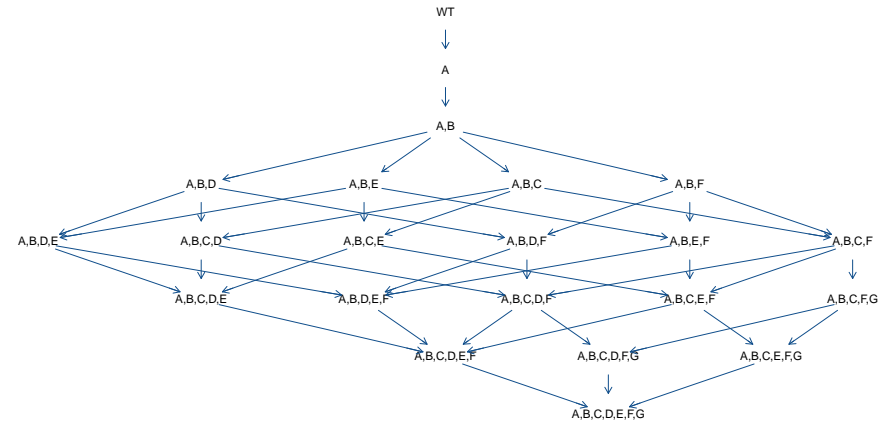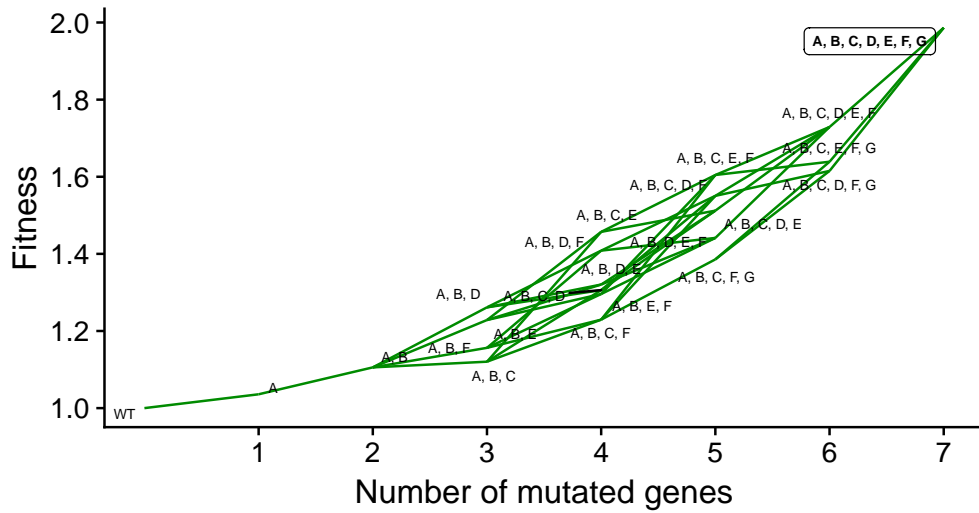

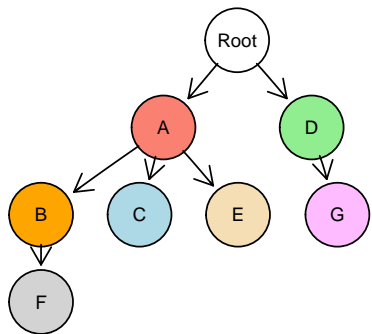

ID **bFmYC2KrBktypLw3**  
 acc genotypes **39**  
 peaks no back 1  
 removed edges 0  
 prop rem edges 0

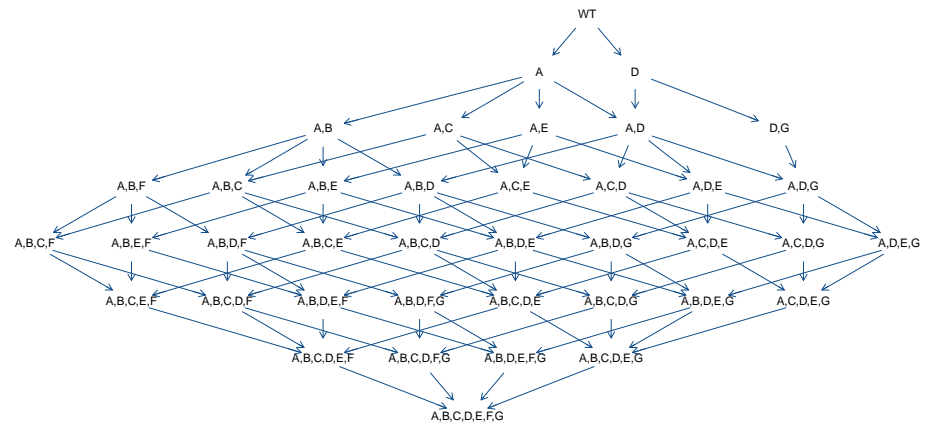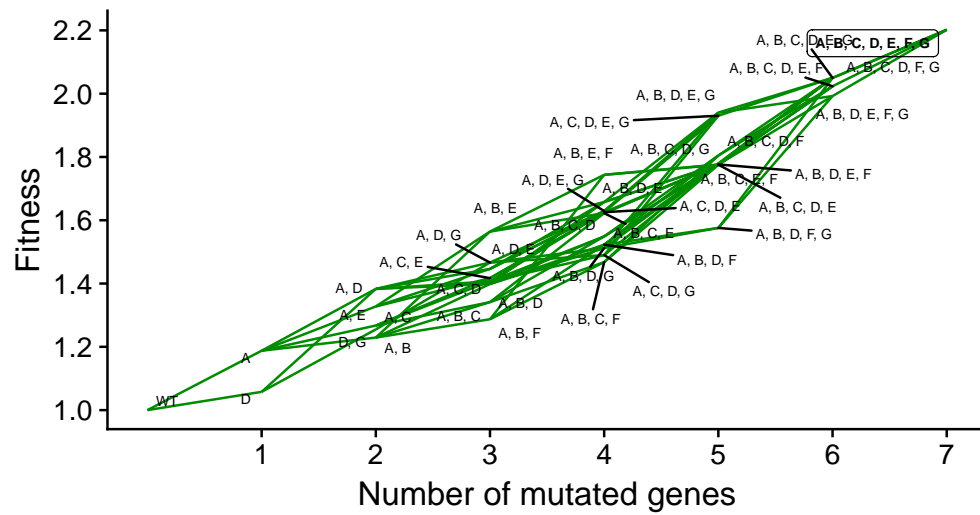

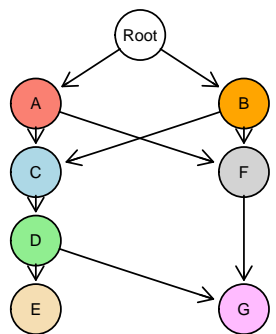

ID BfsxwvogFr6VDw4S  
 acc genotypes 13  
 peaks no back 1  
 removed edges 0  
 prop rem edges 0

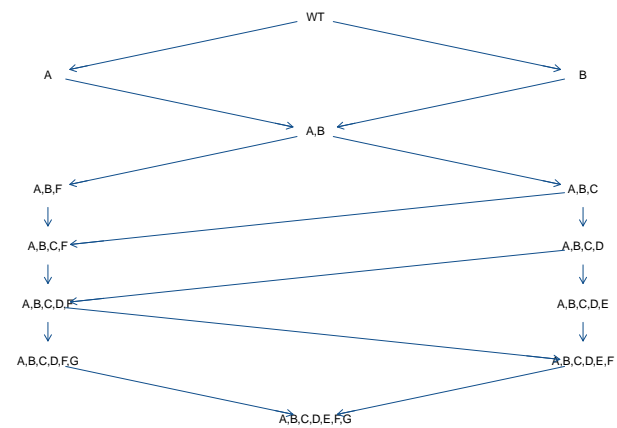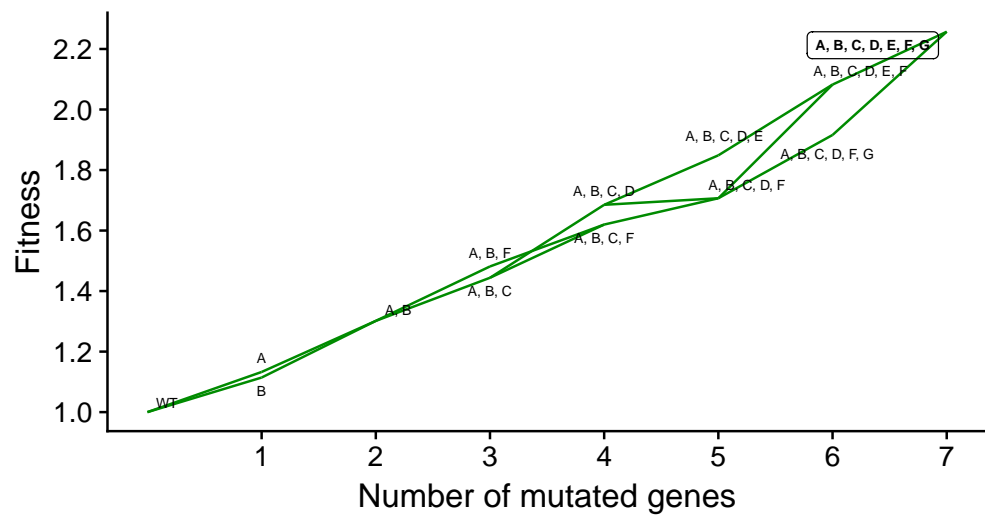

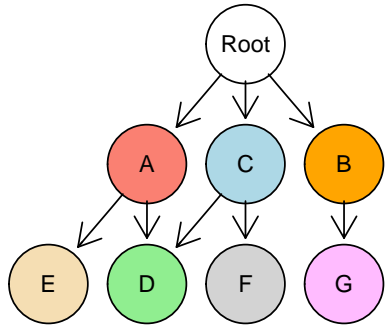

ID **bJlgffVcPbF6GUJI**  
 acc genotypes **39**  
 peaks no back **1**  
 removed edges **0**  
 prop rem edges **0**

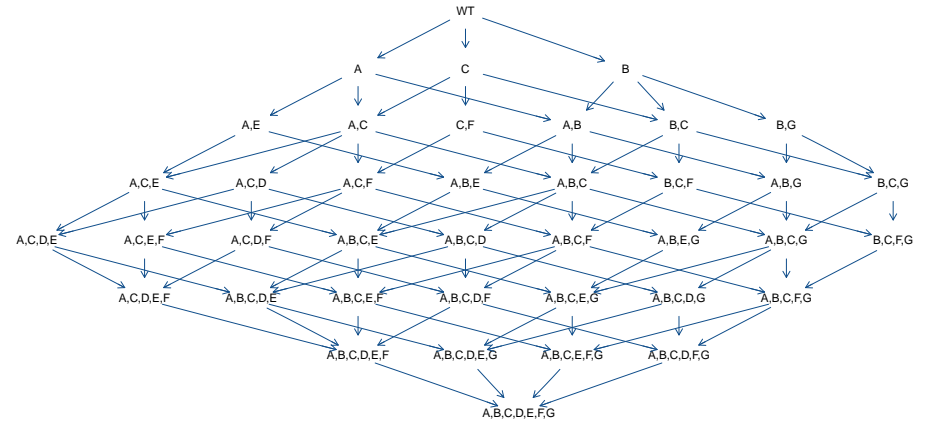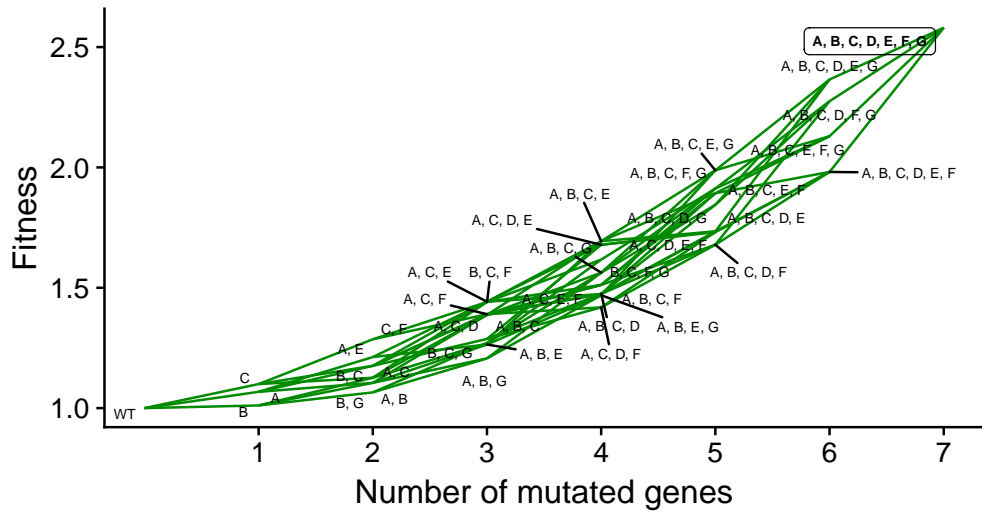

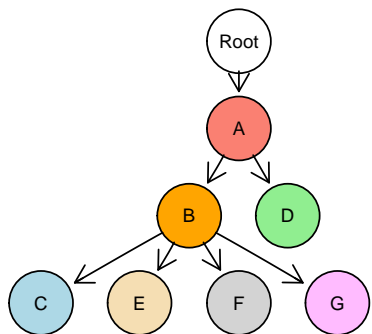

ID **bqjCnNng38uQA1OY**  
 acc genotypes **35**  
 peaks no back 1  
 removed edges 0  
 prop rem edges 0

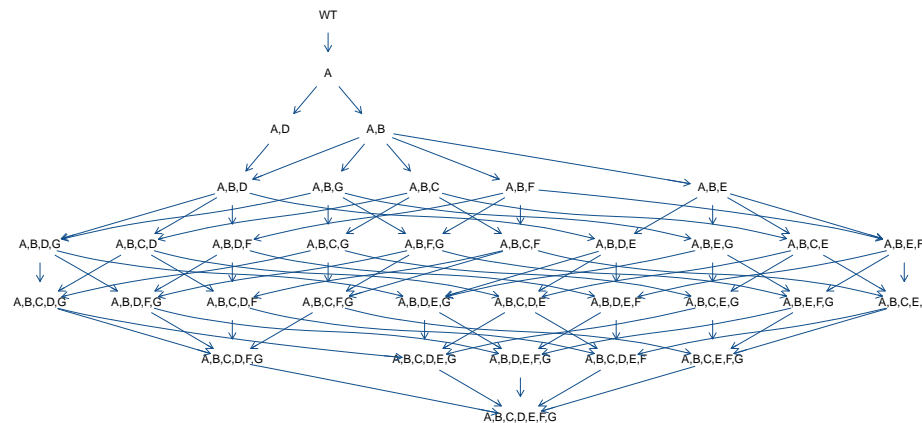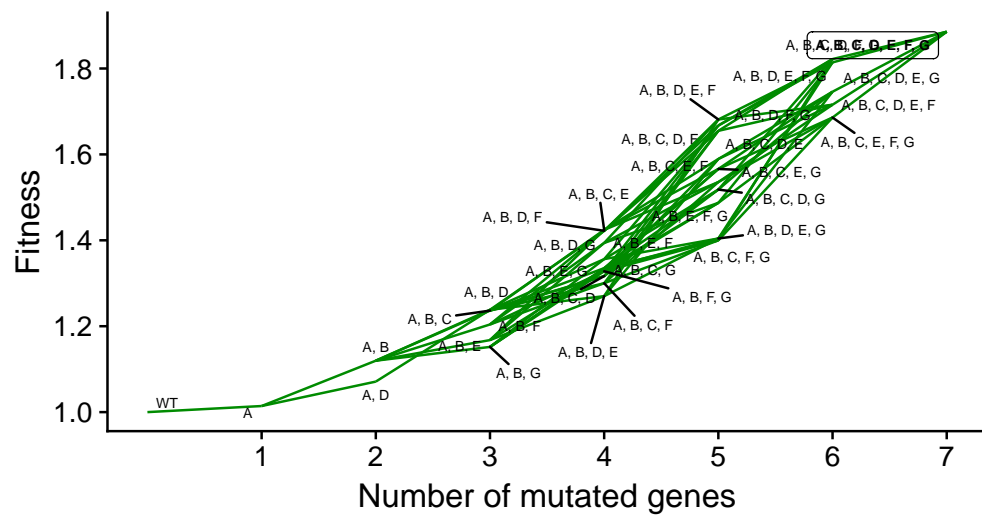

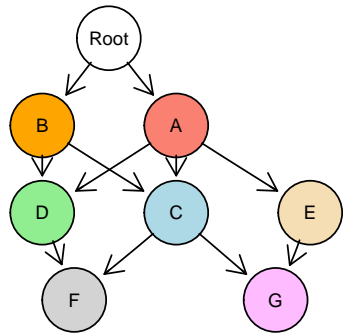

ID **btsq9bPlvHef8E4b**  
 acc genotypes **17**  
 peaks no back 1  
 removed edges 0  
 prop rem edges 0

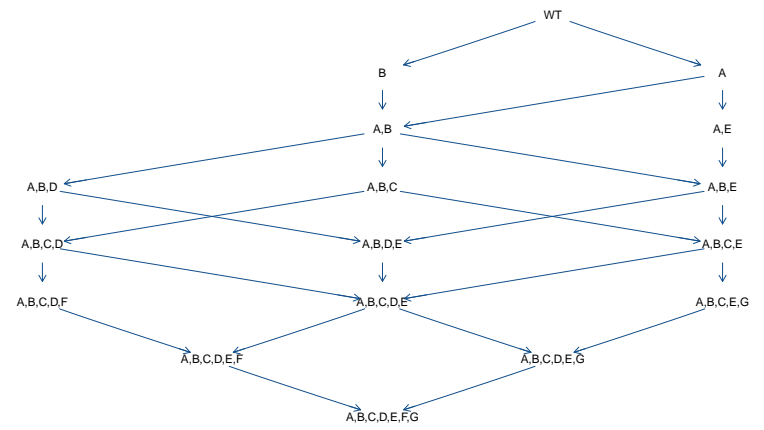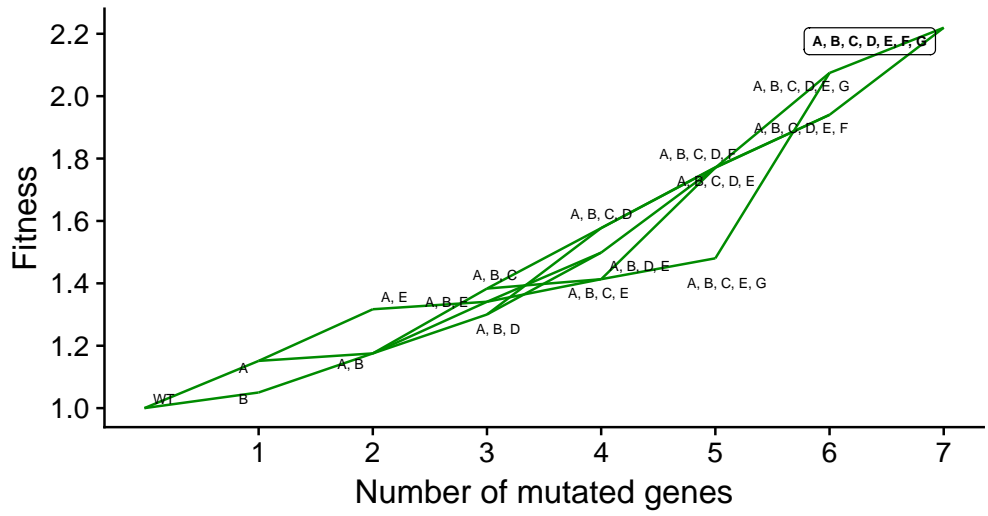

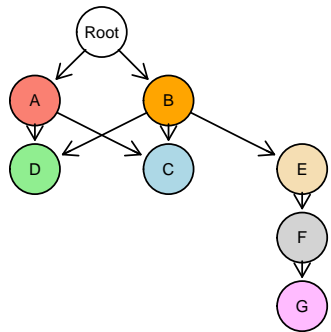

ID BuXQkIRx18pe1ec  
 acc genotypes 22  
 peaks no back 1  
 removed edges 0  
 prop rem edges 0

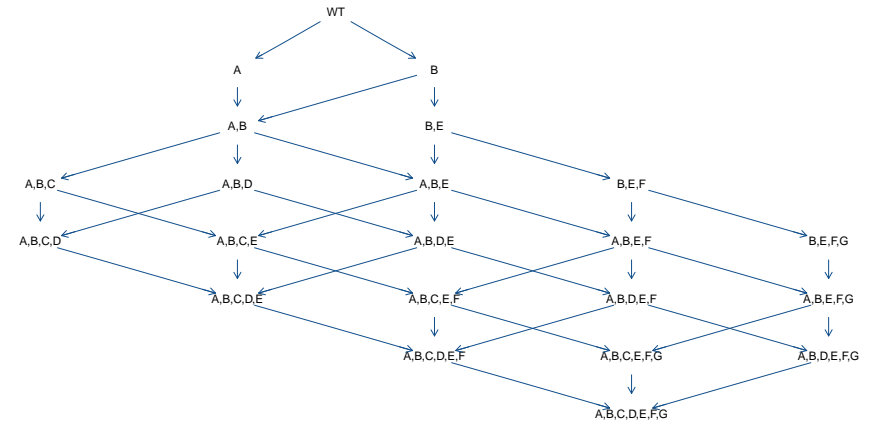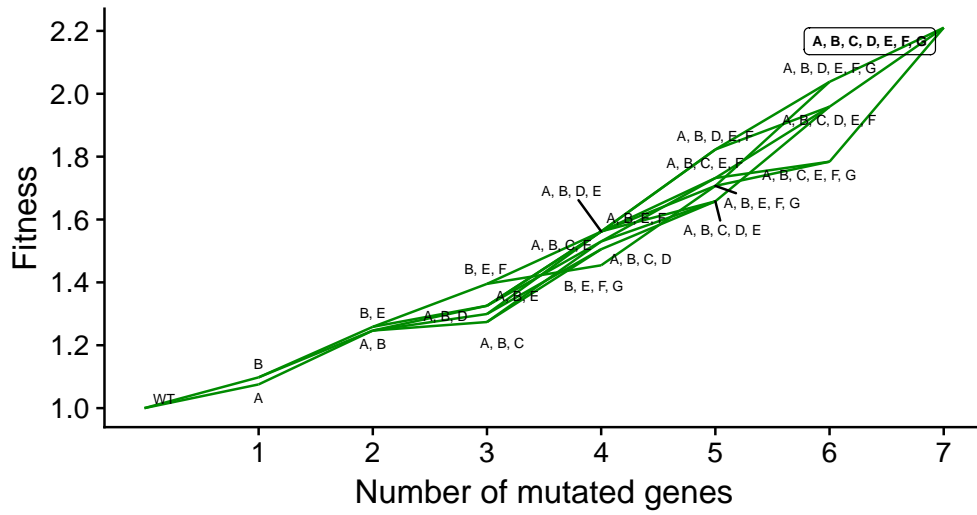



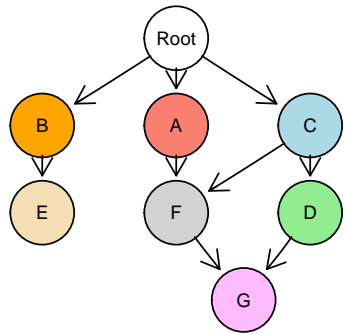

ID cPY2aEYEnXRtcOVx  
 acc genotypes 27  
 peaks no back 1  
 removed edges 0  
 prop rem edges 0

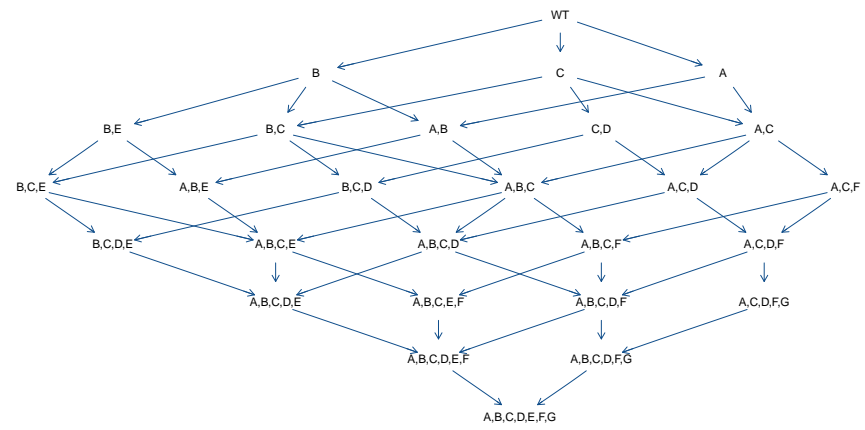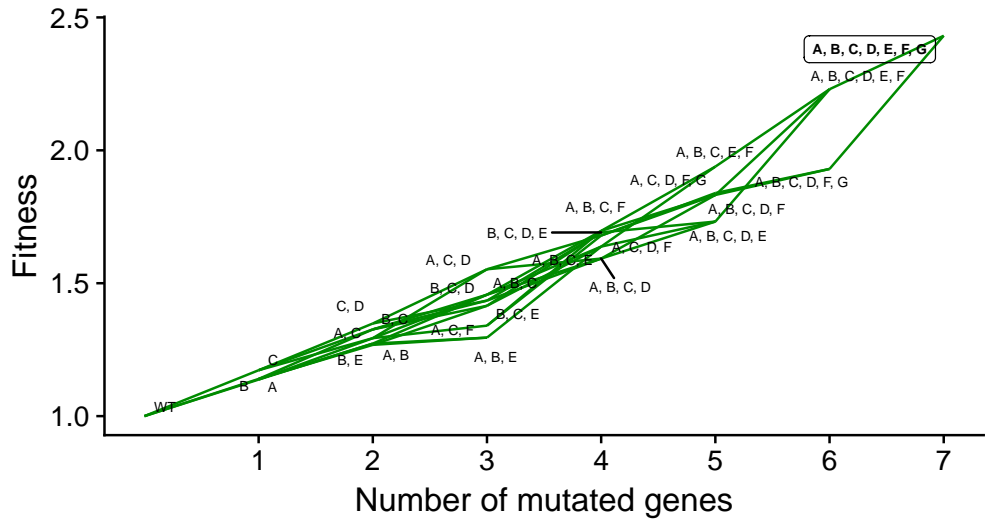

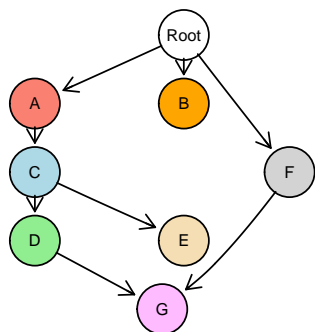

ID cTShsHTaSM2pFU3Z  
 acc genotypes 28  
 peaks no back 1  
 removed edges 0  
 prop rem edges 0

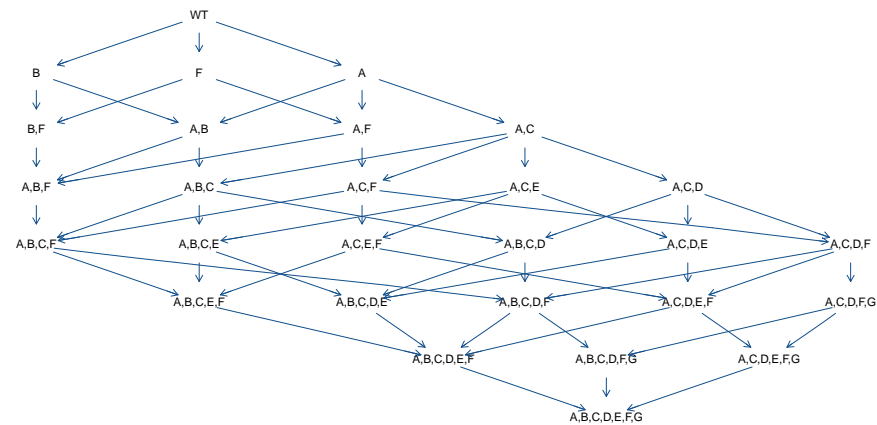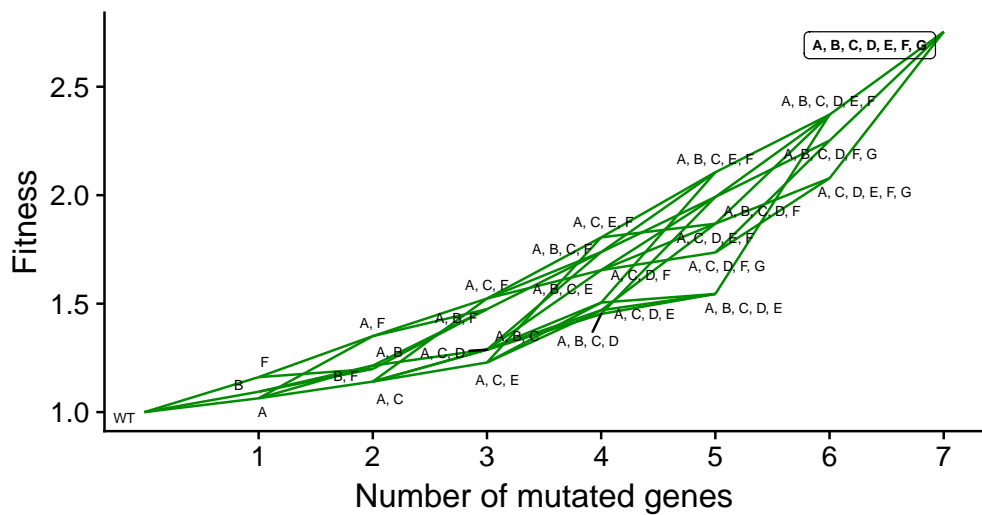

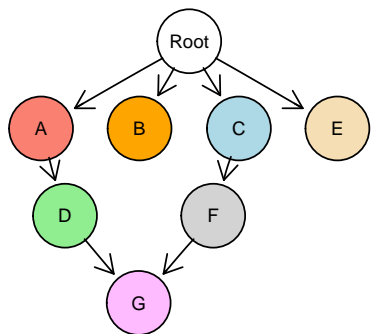

ID **cZ5tgt8lsWr9218O**  
 acc genotypes **40**  
 peaks no back 1  
 removed edges 0  
 prop rem edges 0

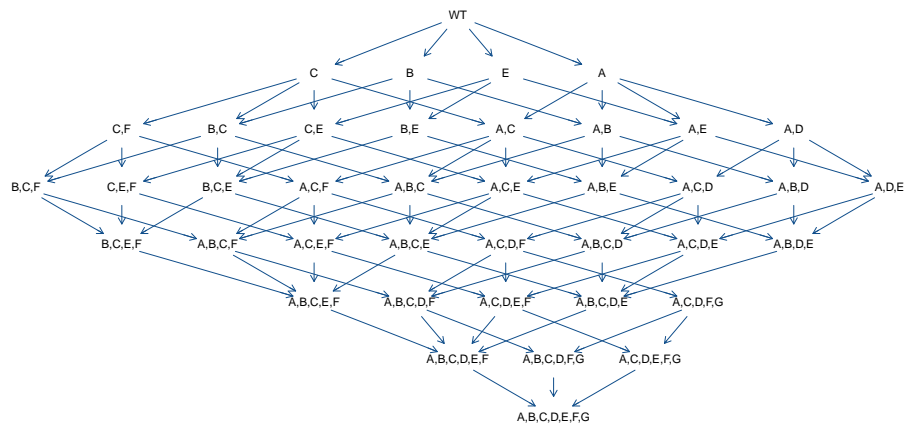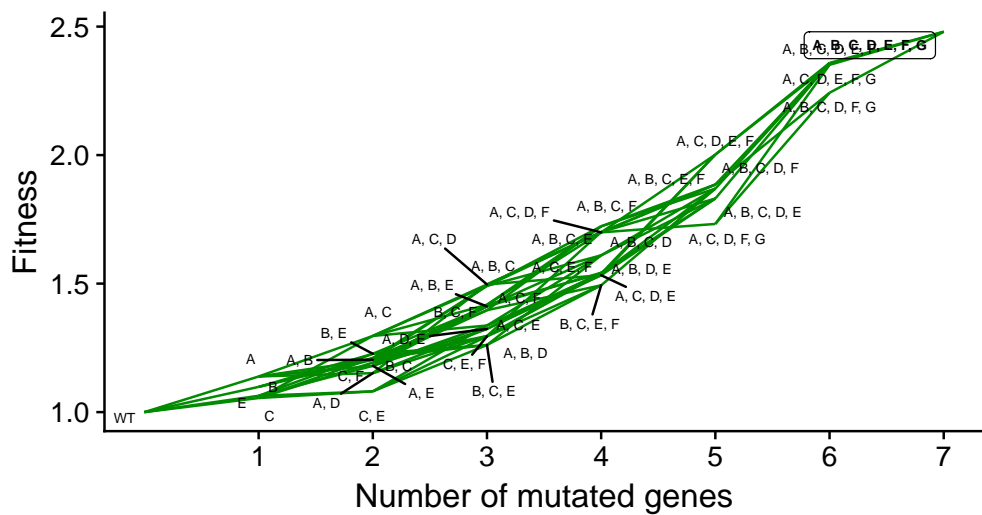

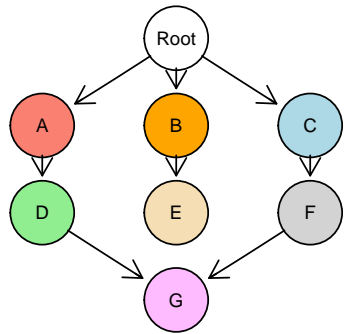

ID D10upTTNDLyeed8b9  
 acc genotypes 30  
 peaks no back 1  
 removed edges 0  
 prop rem edges 0

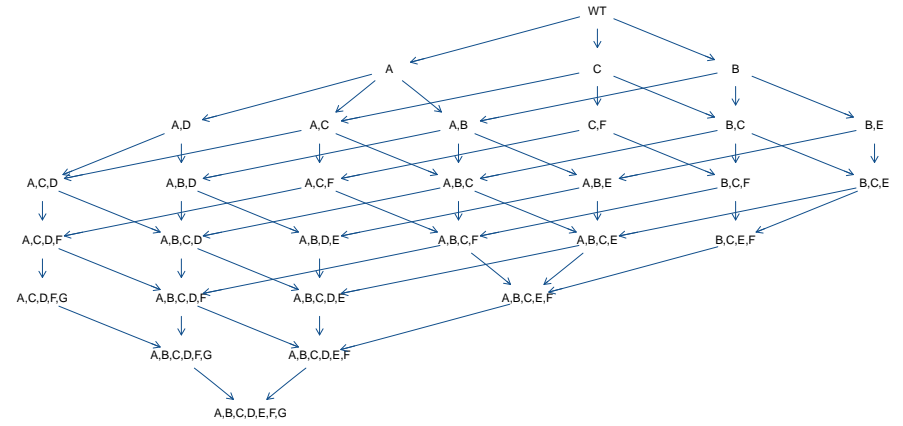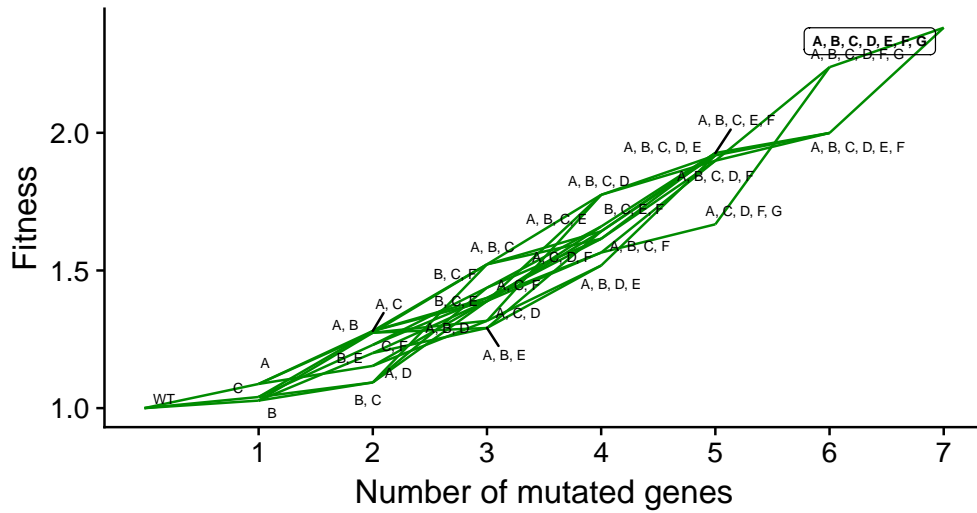

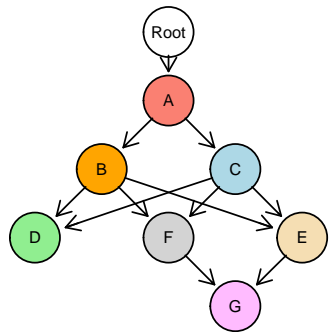

ID DaQ1IMqJ1ktP10uHB  
 acc genotypes 14  
 peaks no back 1  
 removed edges 0  
 prop rem edges 0

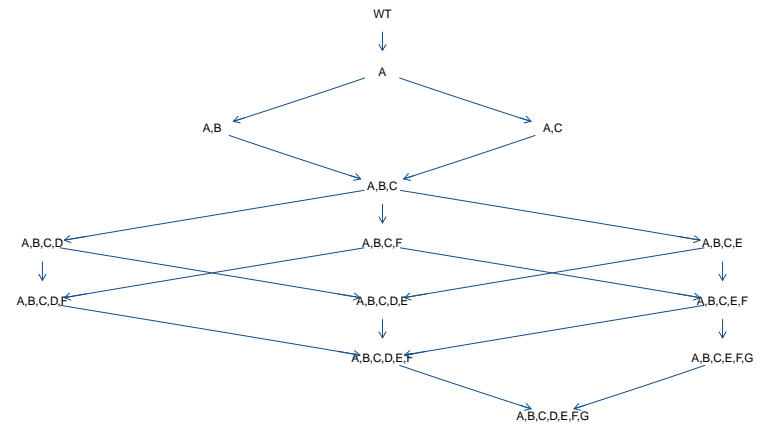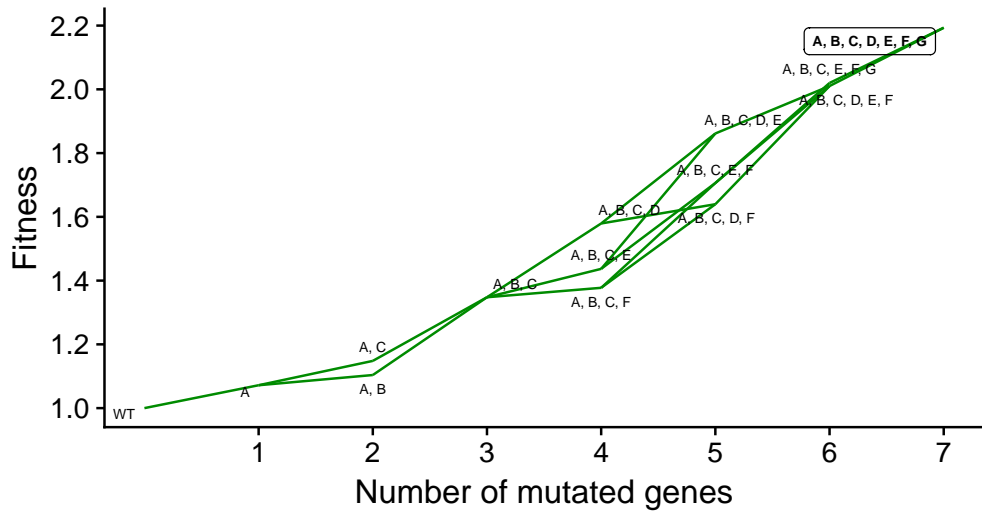

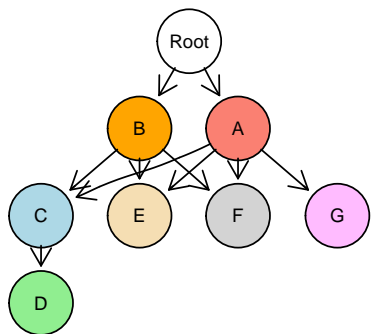

ID dG5EKqdkRReFI4LP  
 acc genotypes 28  
 peaks no back 1  
 removed edges 0  
 prop rem edges 0

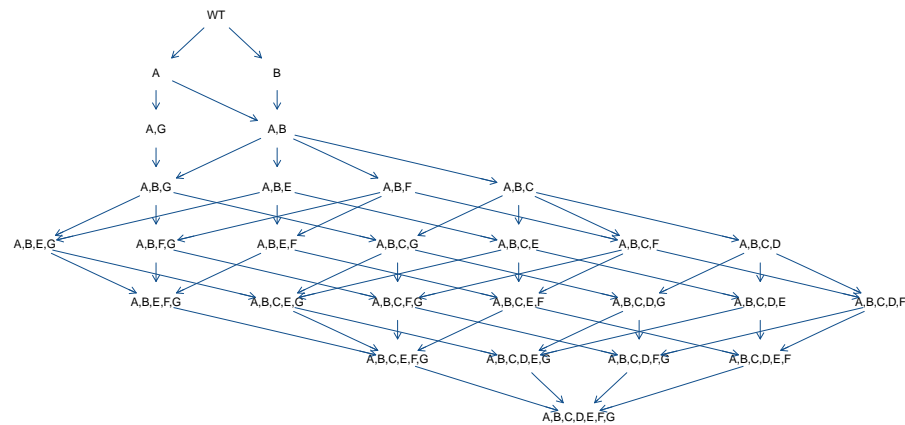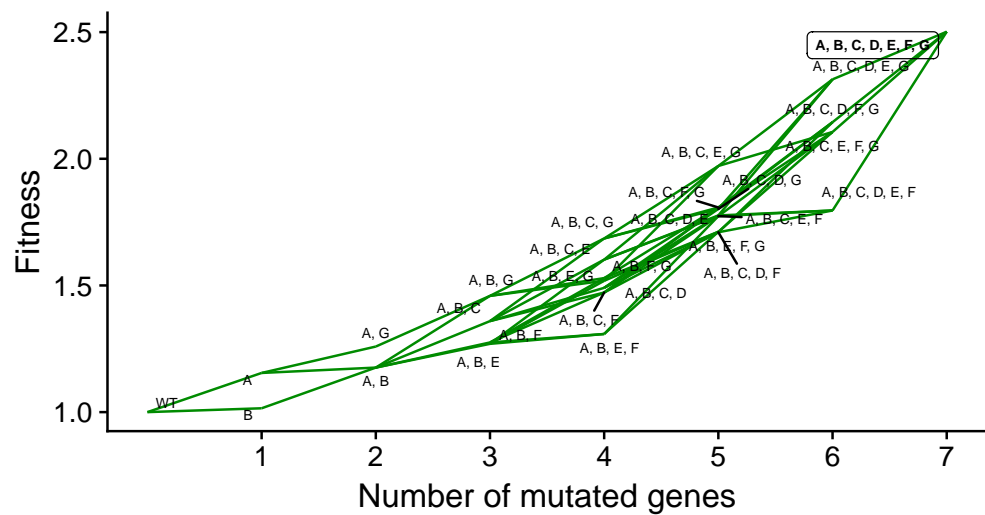

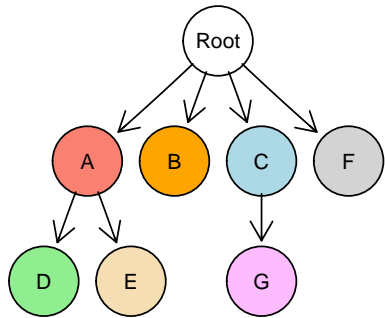

ID **DMEr7pbZBacNnQg**  
 acc genotypes **60**  
 peaks no back **1**  
 removed edges **0**  
 prop rem edges **0**

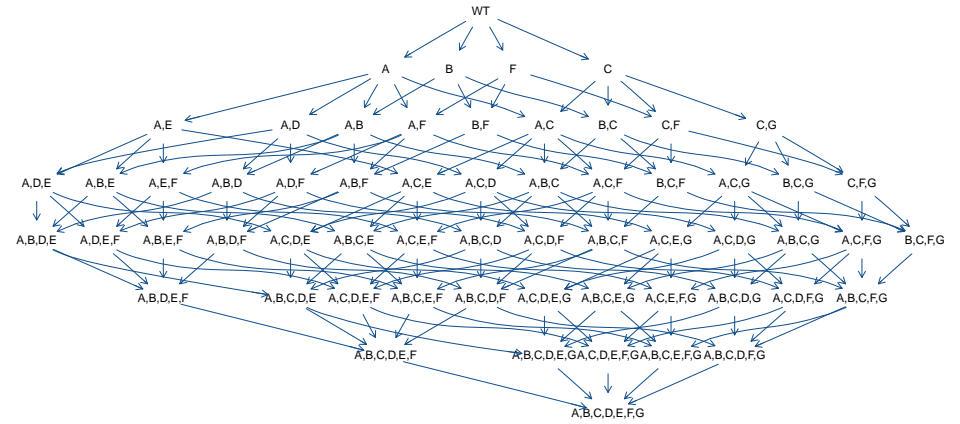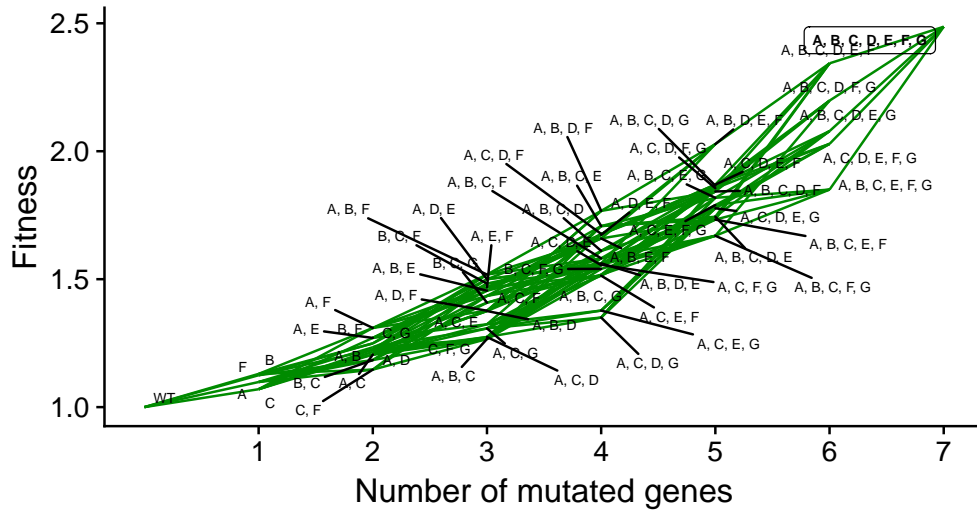

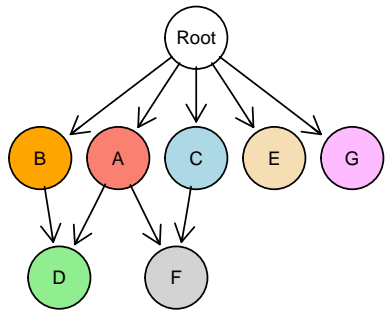

ID **dmZHV2wAZ3zFIHOq**  
 acc genotypes **52**  
 peaks no back 1  
 removed edges 0  
 prop rem edges 0

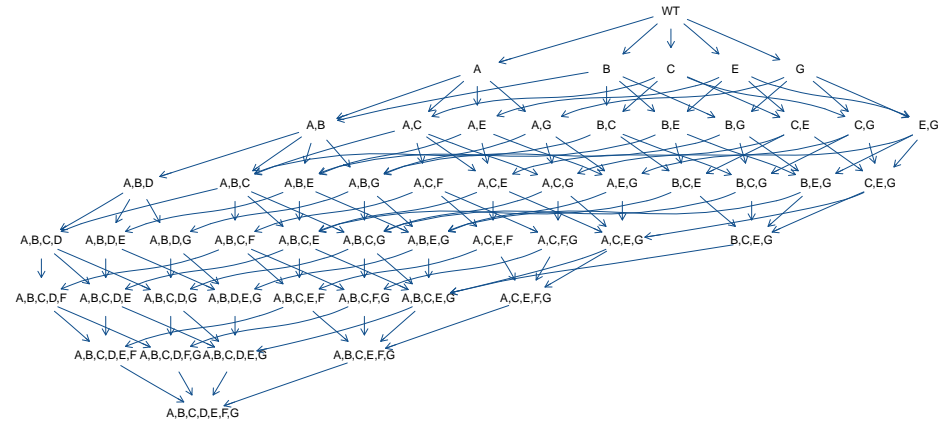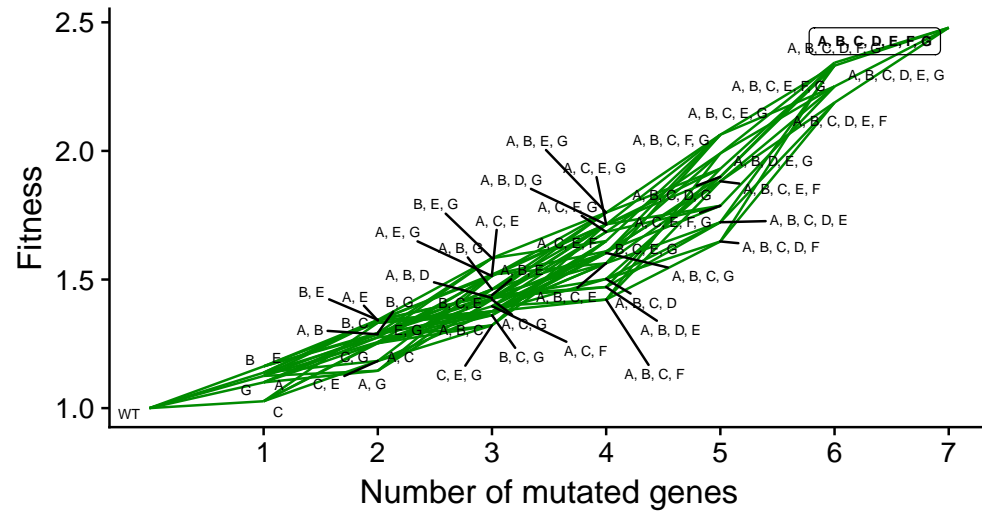



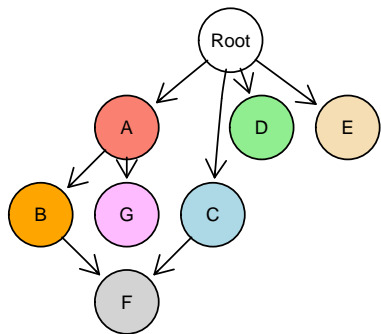

ID DNdxF6nsuNX9Tqlx  
 acc genotypes 48  
 peaks no back 1  
 removed edges 0  
 prop rem edges 0

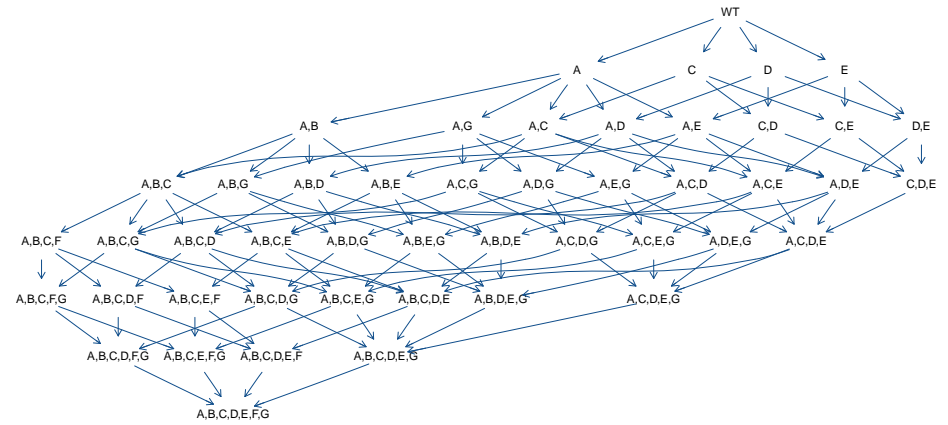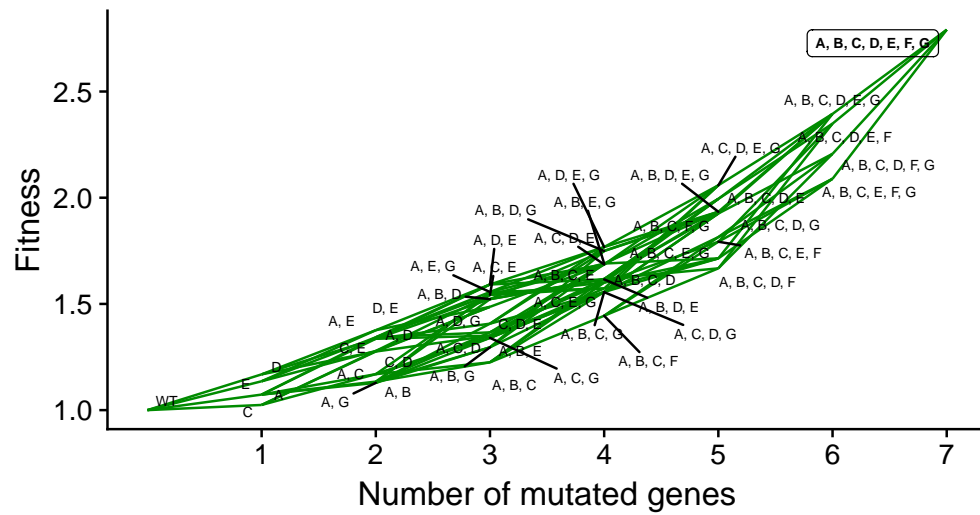

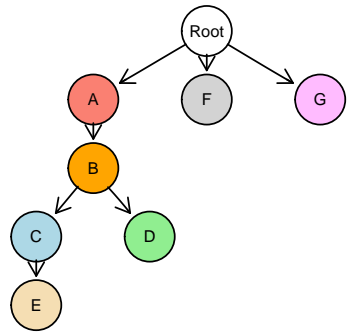

ID **Dv8B7RHWdguRzH1W**  
 acc genotypes **32**  
 peaks no back 1  
 removed edges 0  
 prop rem edges 0

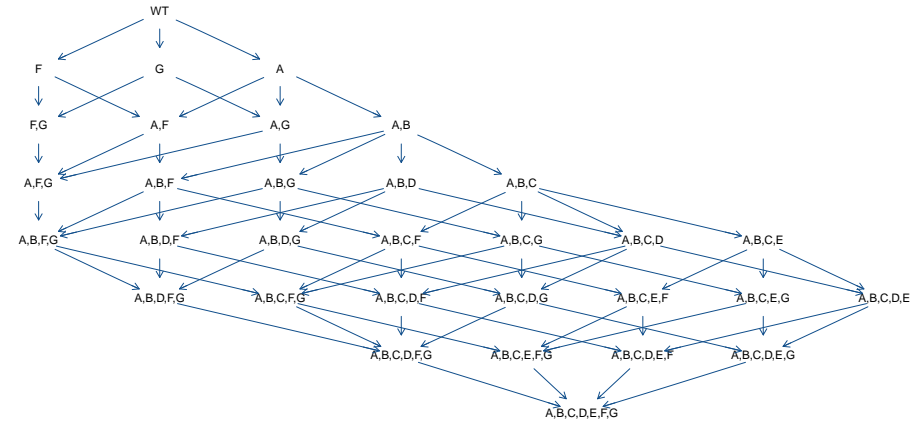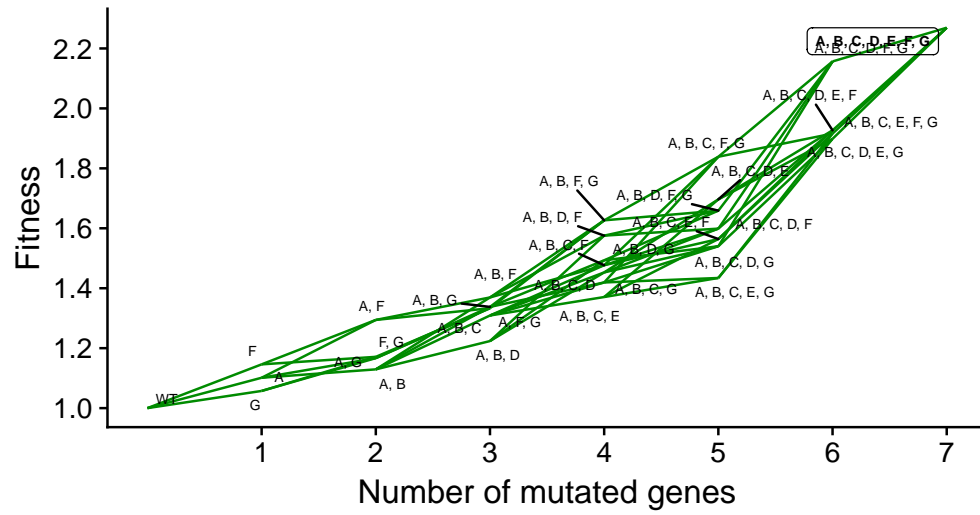

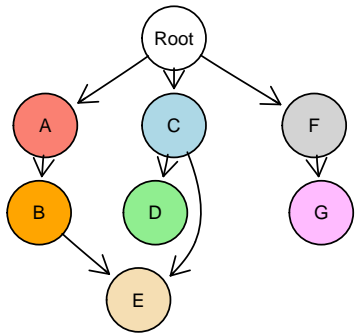

ID e6d6sLGIhLVqnRO4  
 acc genotypes 33  
 peaks no back 1  
 removed edges 0  
 prop rem edges 0

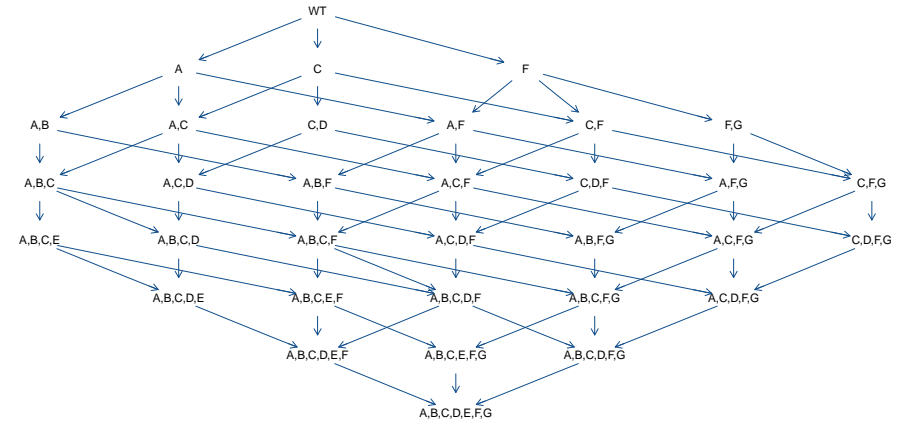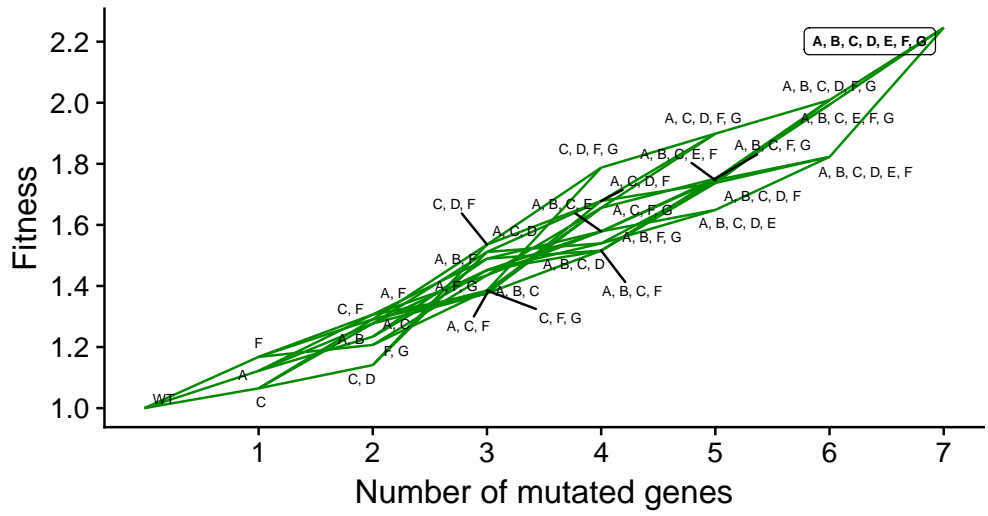

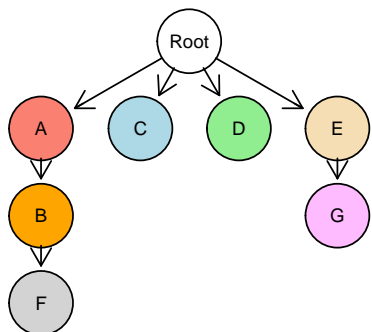

ID **E7PUOGD47fKBfgGx**  
*acc genotypes* **48**  
*peaks no back* 1  
*removed edges* 0  
*prop rem edges* 0

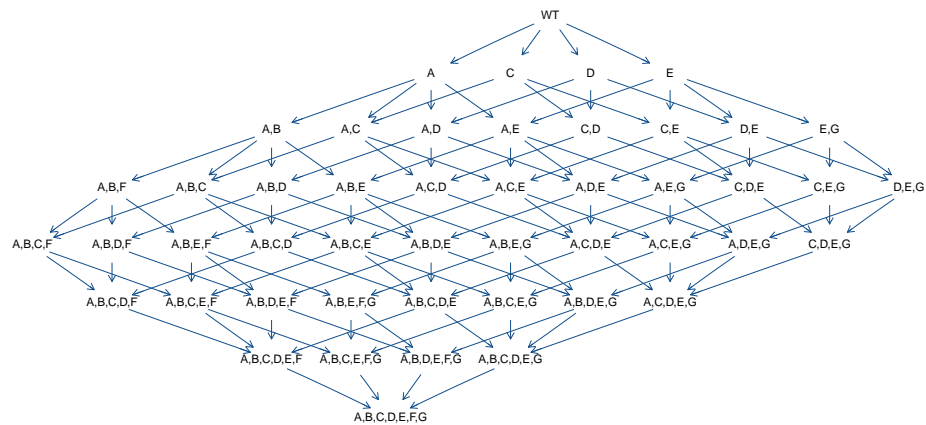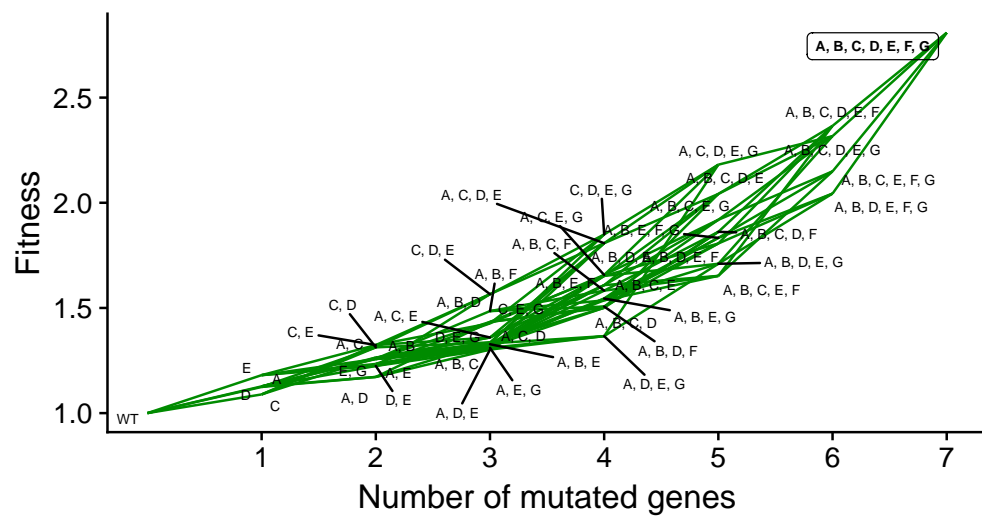

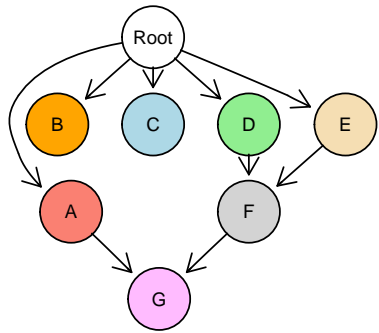

ID eEiiU6lXTAitvbXD  
 acc genotypes 44  
 peaks no back 1  
 removed edges 0  
 prop rem edges 0

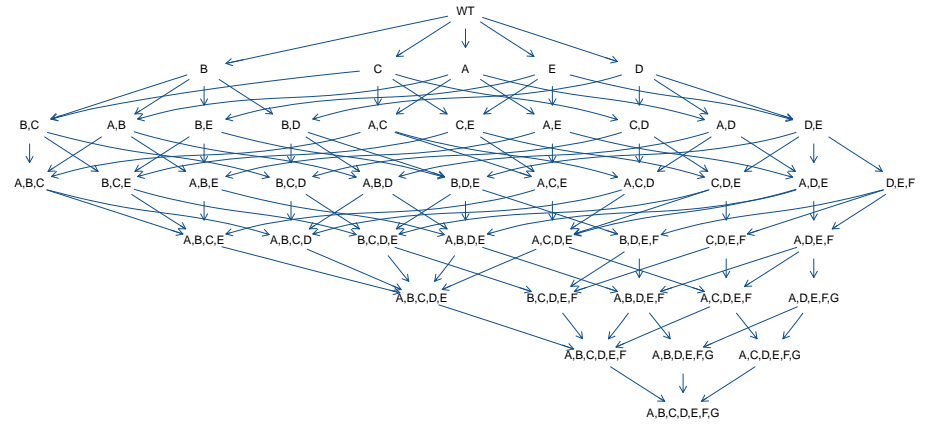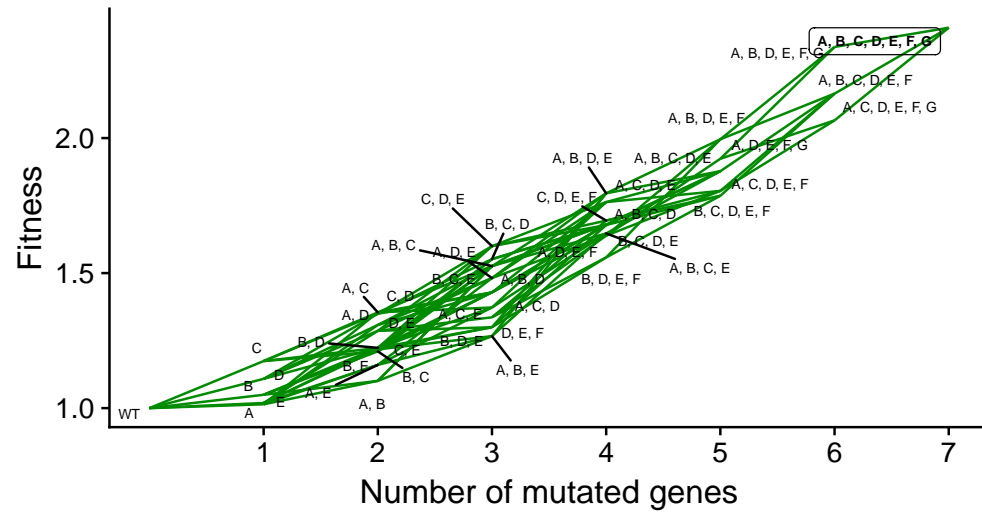

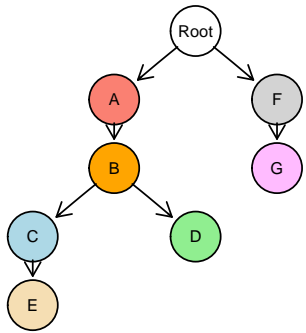

ID EF3dPOLYSD4SFyjp  
 acc genotypes 24  
 peaks no back 1  
 removed edges 0  
 prop rem edges 0

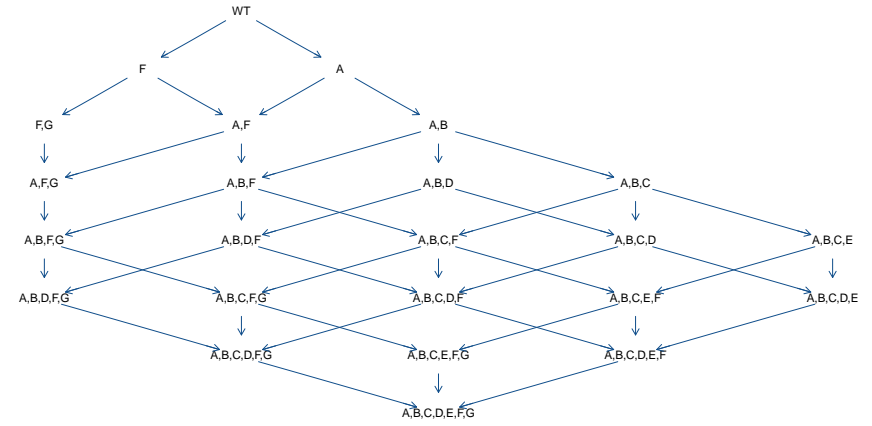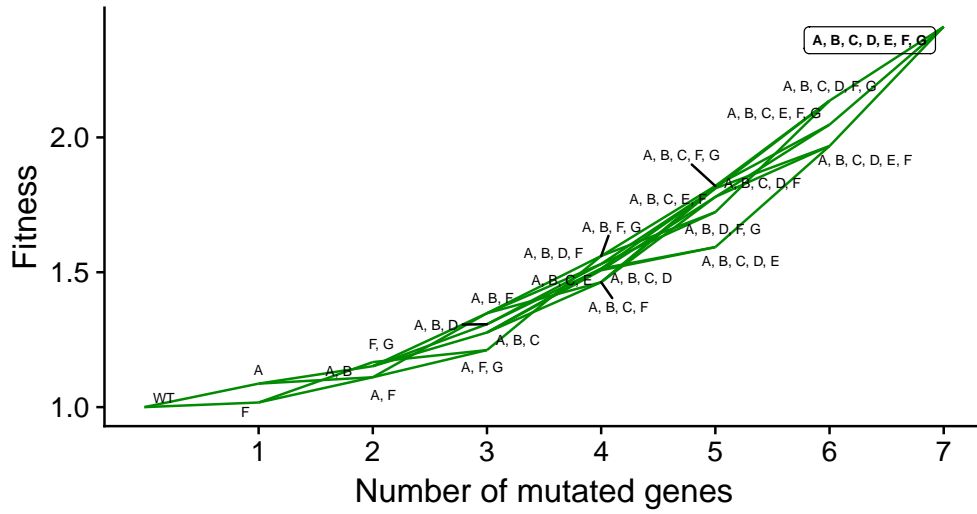

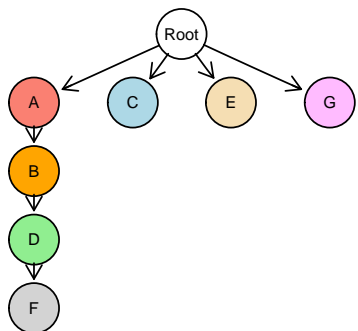

ID EikpyAkVdLnWHzZF  
 acc genotypes 40  
 peaks no back 1  
 removed edges 0  
 prop rem edges 0

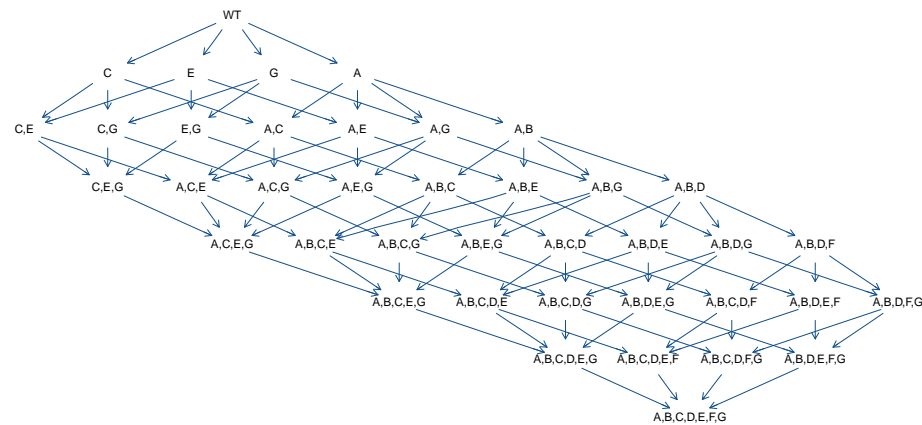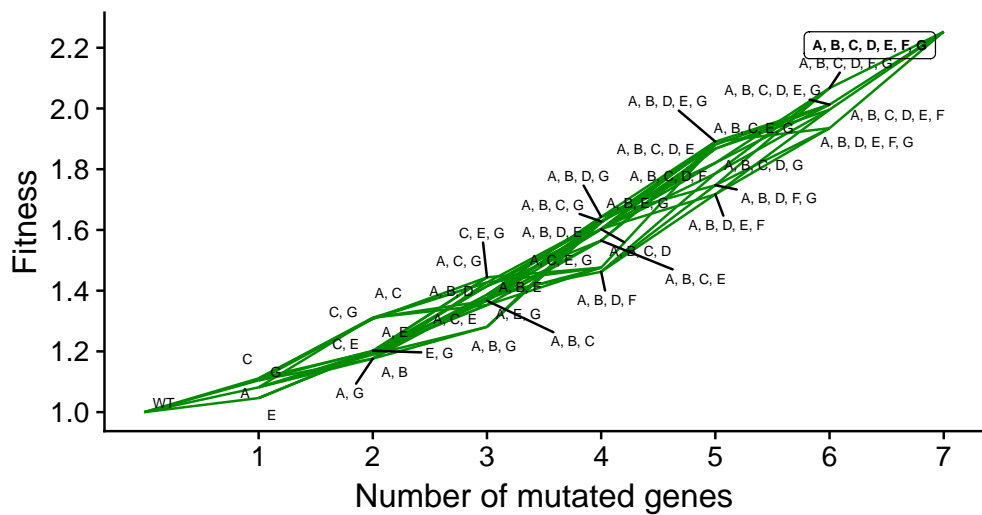

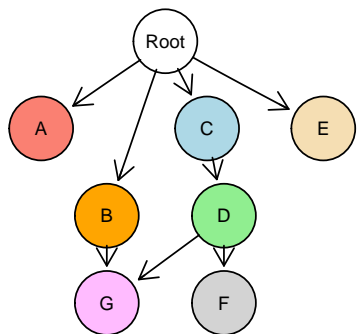

ID **EL1Qu5ixDsidHlqT**  
 acc genotypes **40**  
 peaks no back **1**  
 removed edges **0**  
 prop rem edges **0**

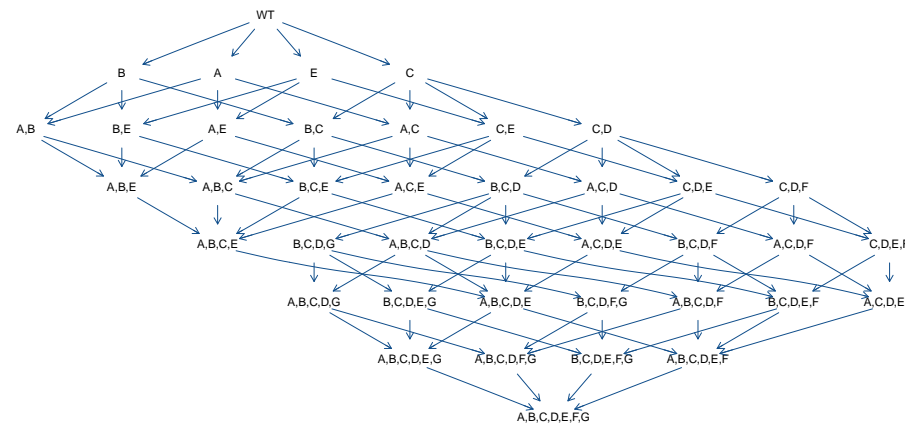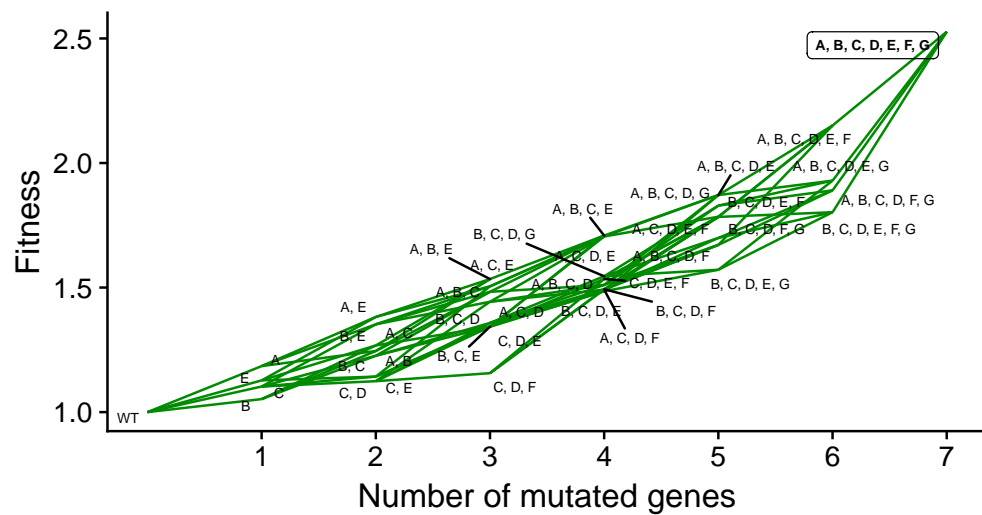



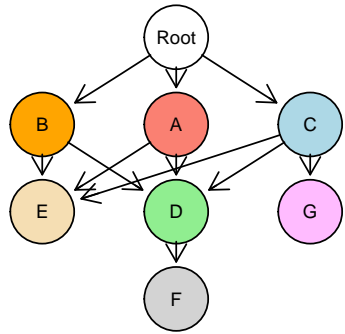

ID eyXg2MFYIT9dyly  
 acc genotypes 22  
 peaks no back 1  
 removed edges 0  
 prop rem edges 0

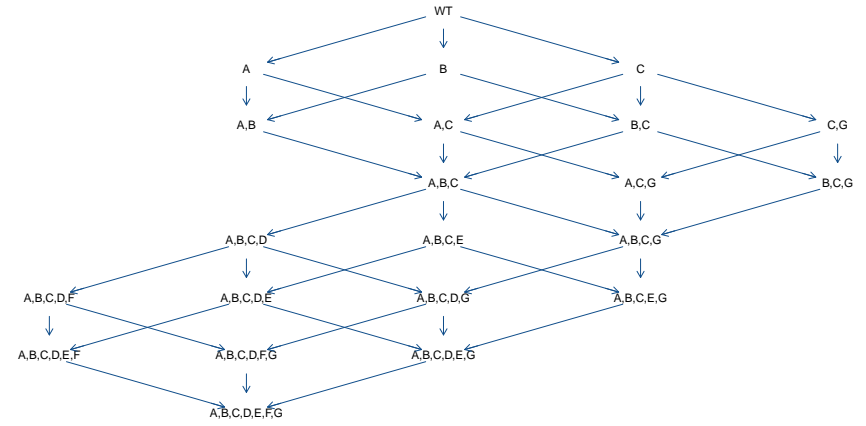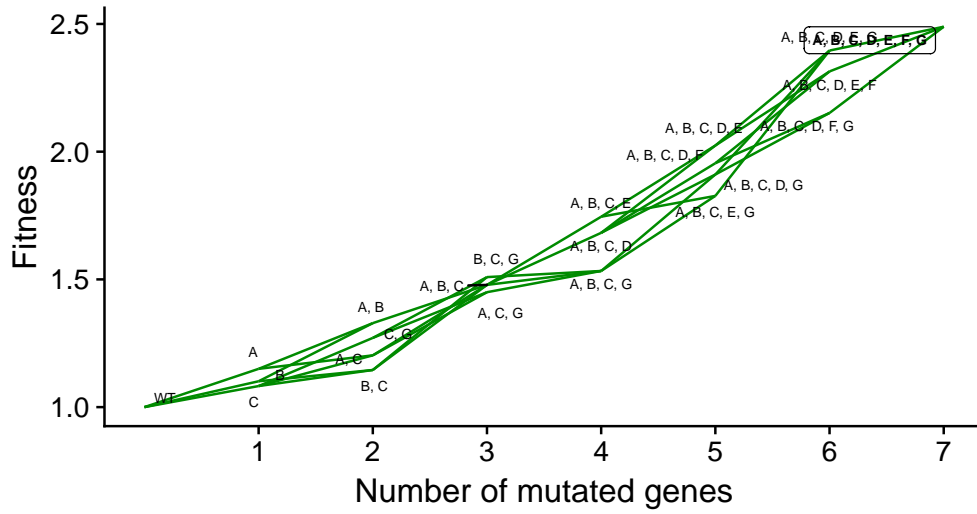

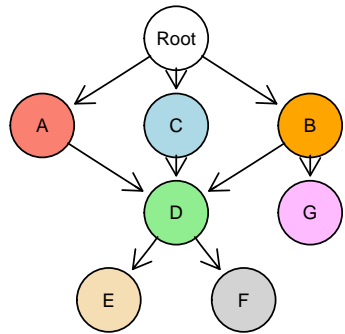

ID FcKyPNlguFUaV10  
 acc genotypes 20  
 peaks no back 1  
 removed edges 0  
 prop rem edges 0

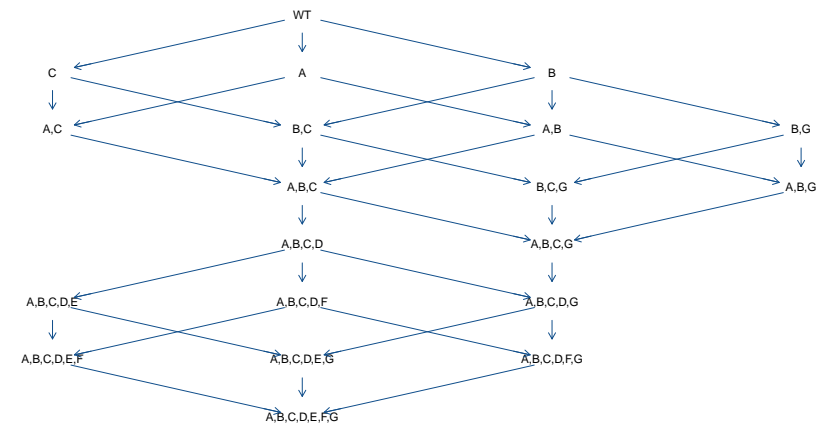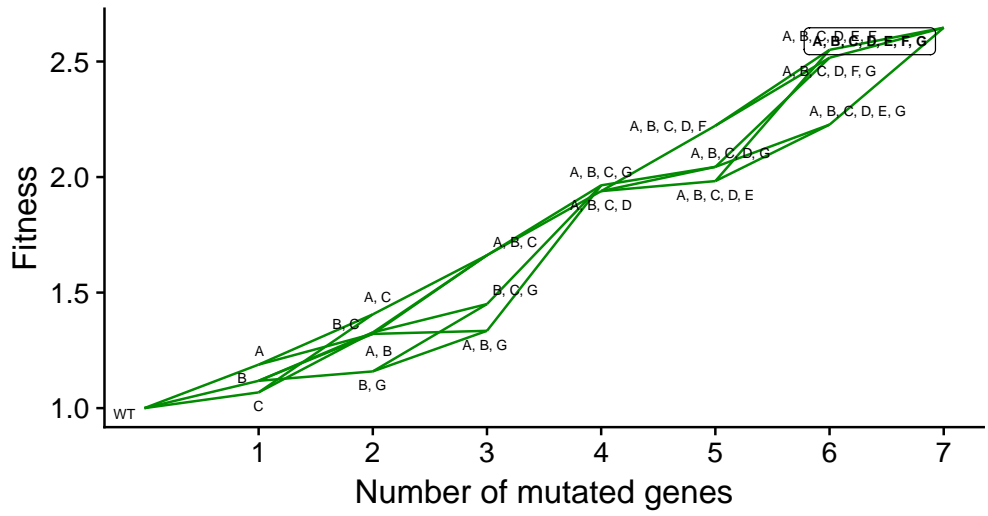

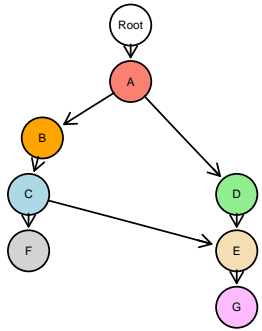

ID FL34ukOM10yOTdr2W  
 acc genotypes 13  
 peaks no back 1  
 removed edges 0  
 prop rem edges 0

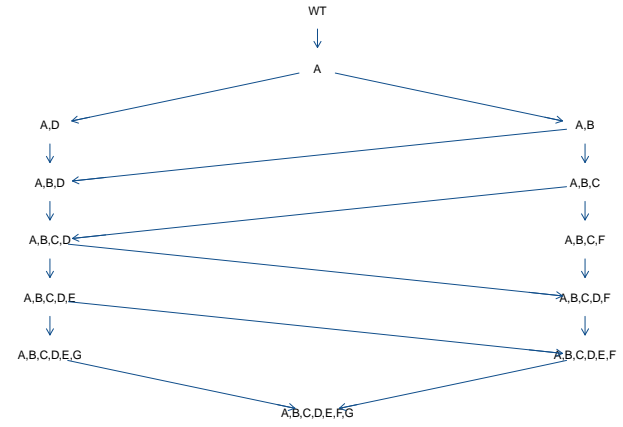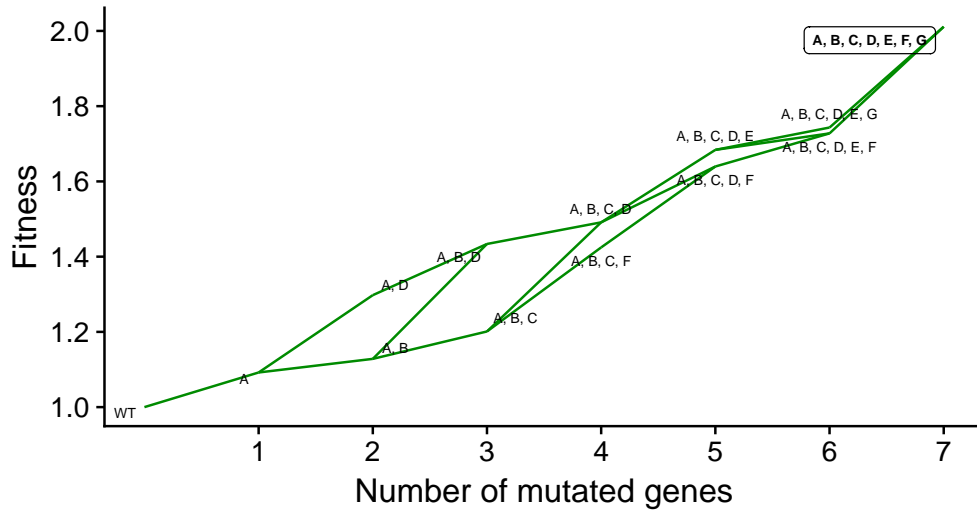

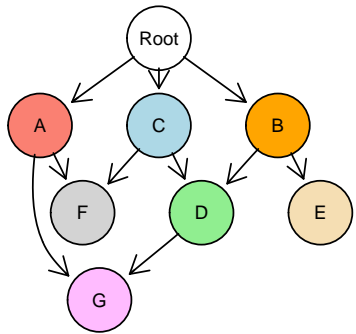

ID fMD9ePnbEbDWW2mR  
 acc genotypes 25  
 peaks no back 1  
 removed edges 0  
 prop rem edges 0

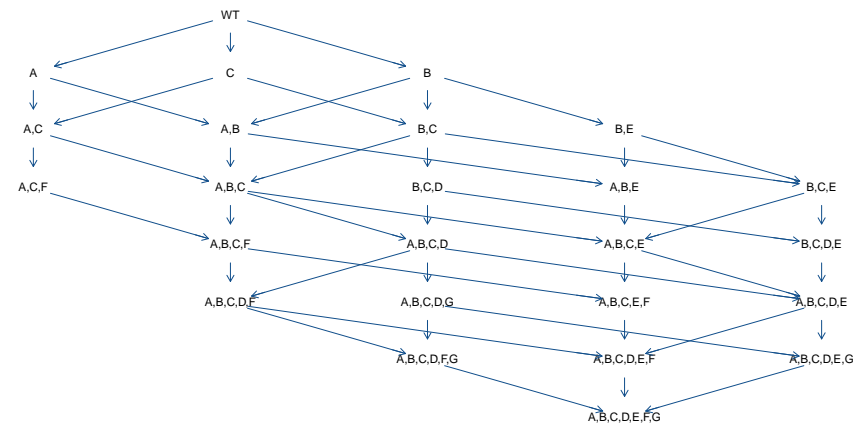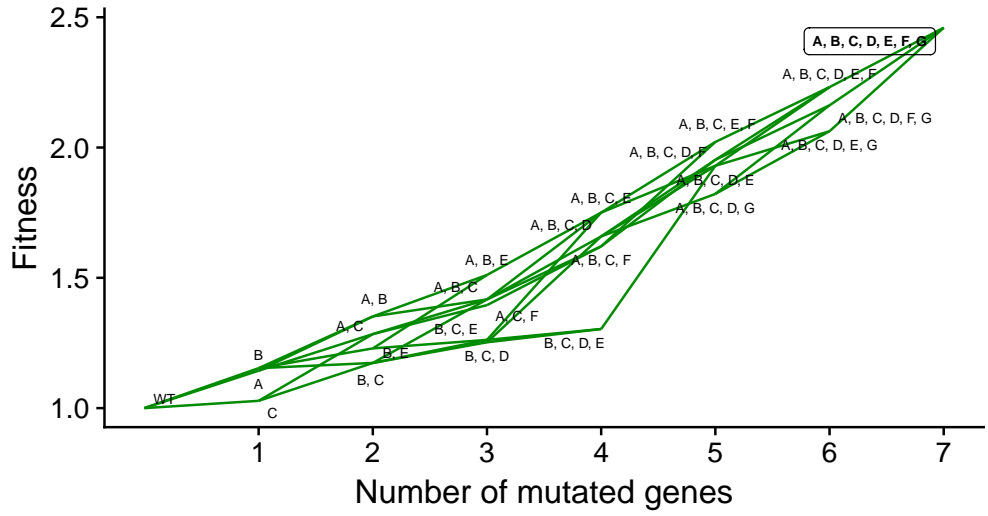

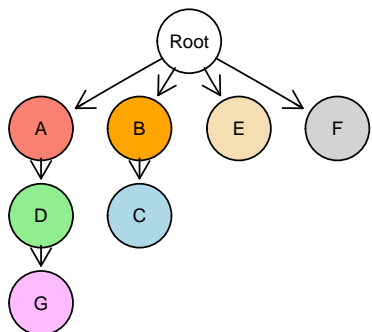

ID f03JEzhobZEAWxH  
 acc genotypes 48  
 peaks no back 1  
 removed edges 0  
 prop rem edges 0

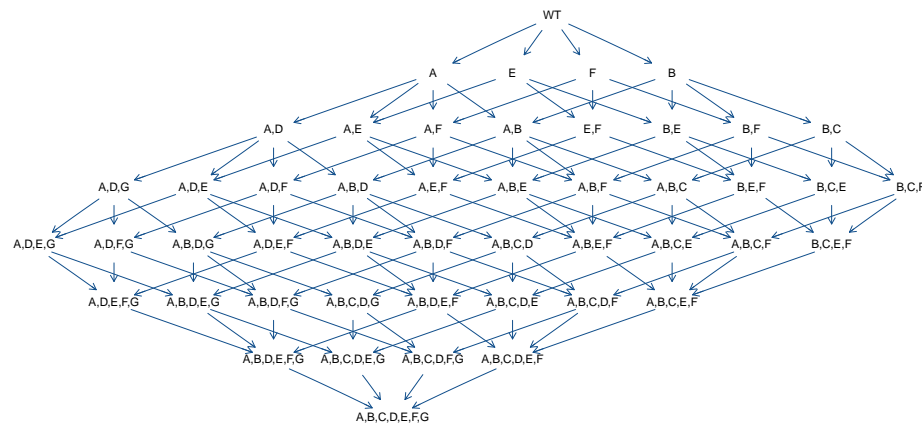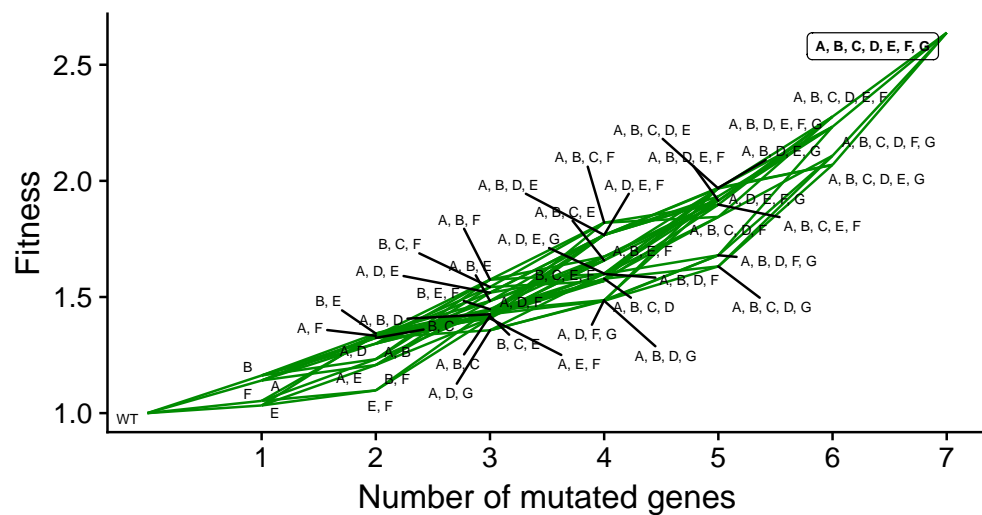

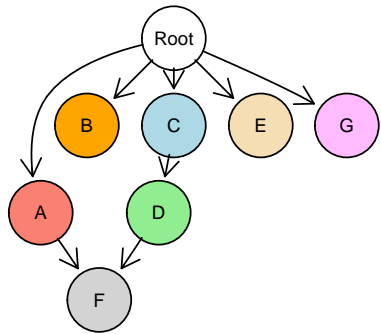

ID FoHYHTCWCEdt7JW8  
 acc genotypes 56  
 peaks no back 1  
 removed edges 0  
 prop rem edges 0

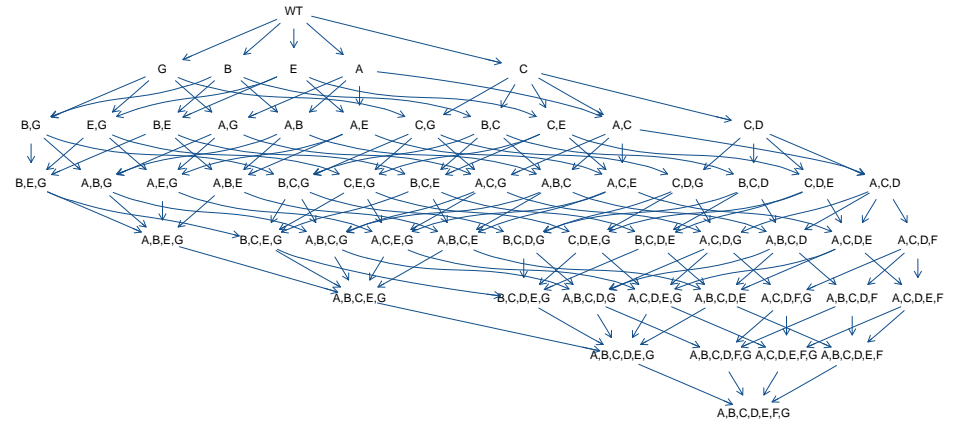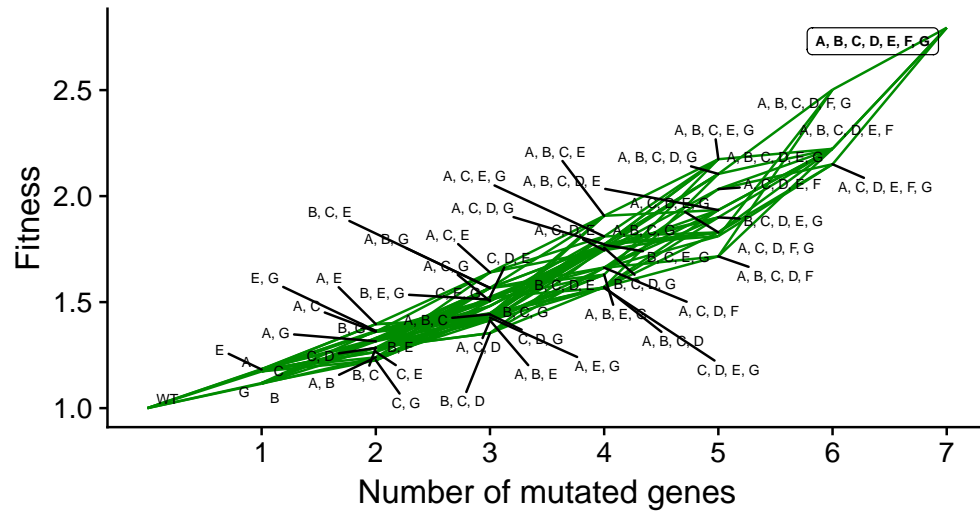

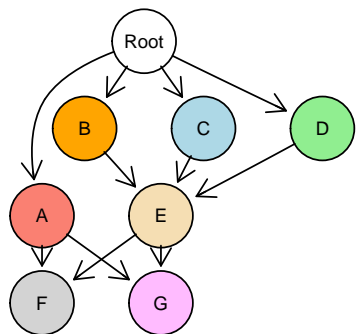

ID **FooCHDFetllLSqj**  
 acc genotypes **21**  
 peaks no back 1  
 removed edges 0  
 prop rem edges 0

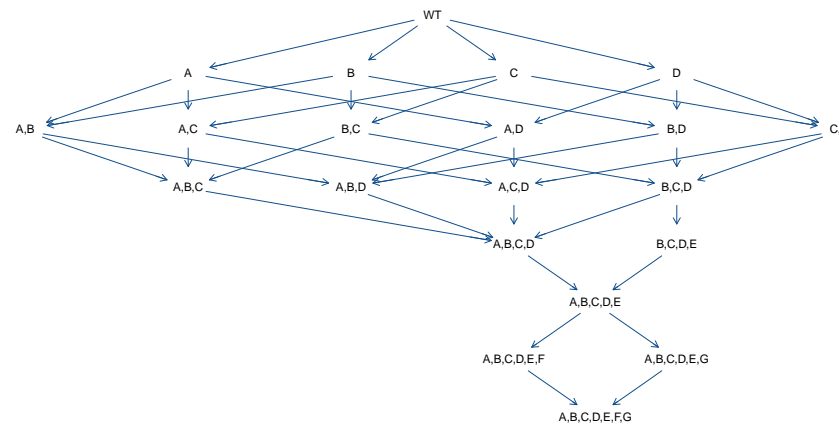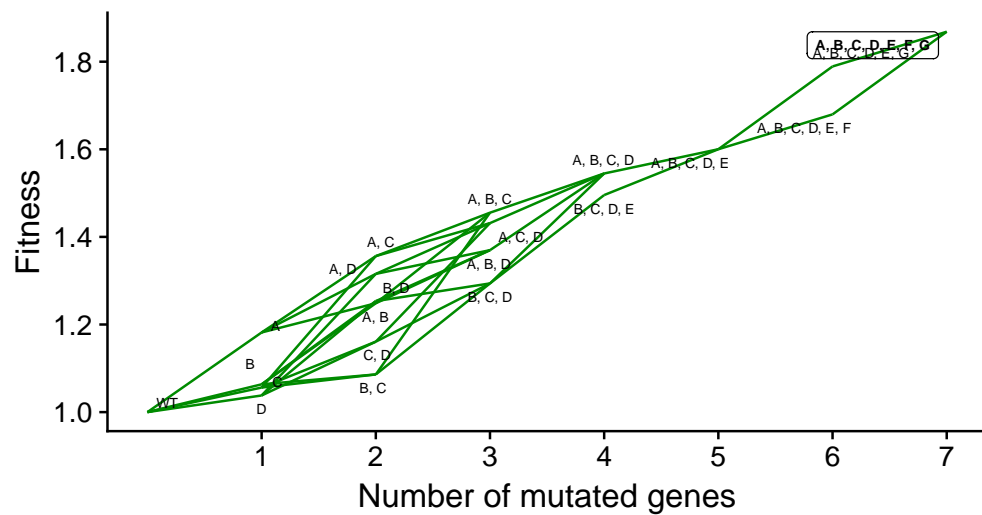

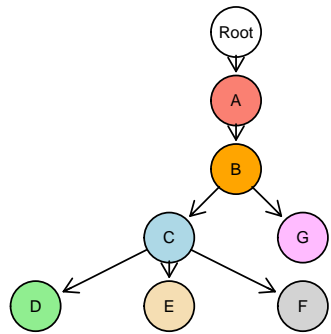

ID **Gb23niBOgn9YAzw**  
 acc genotypes **20**  
 peaks no back **1**  
 removed edges **0**  
 prop rem edges **0**

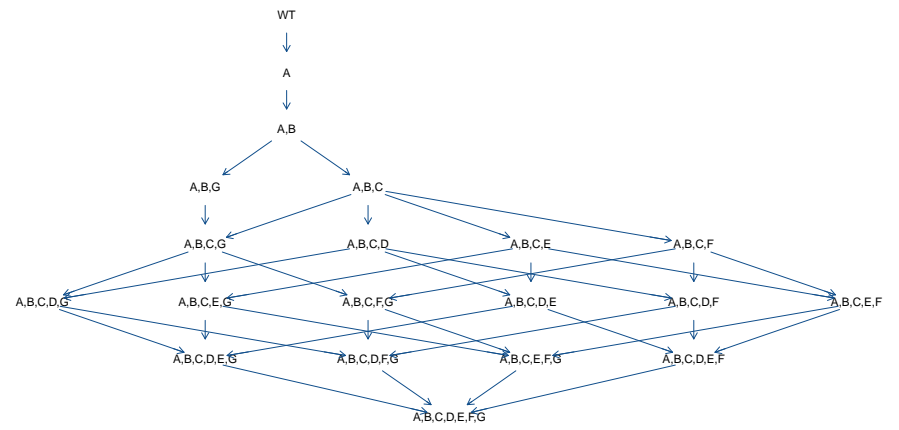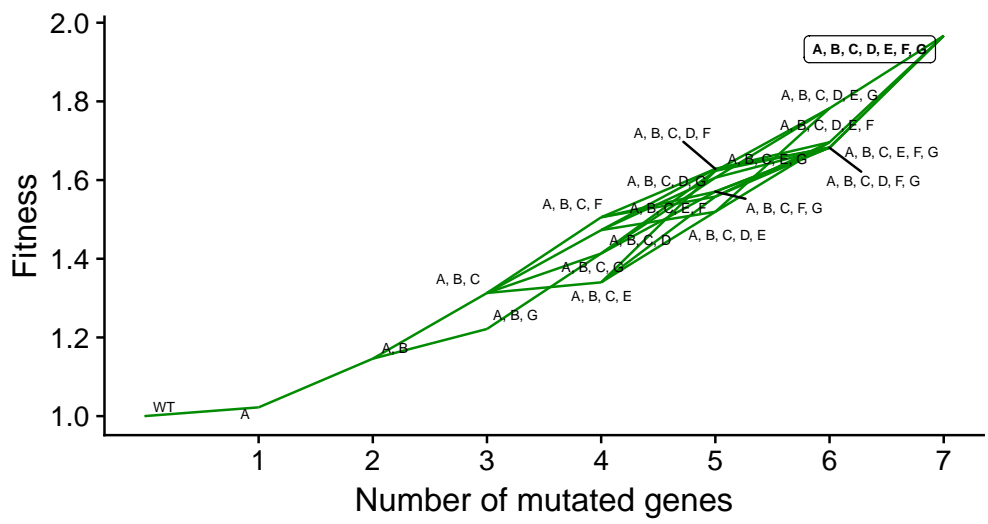



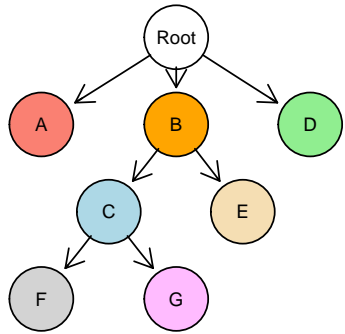

ID **GIWxSFRzKt1hZIMN**  
 acc genotypes **44**  
 peaks no back 1  
 removed edges 0  
 prop rem edges 0

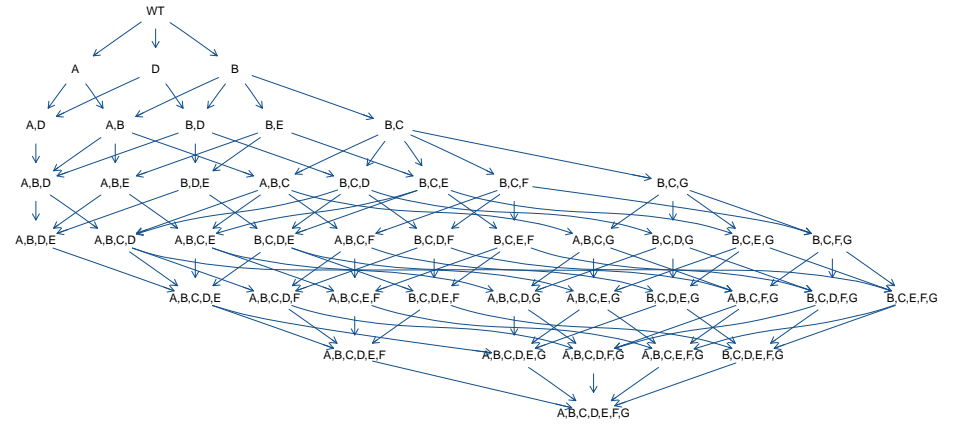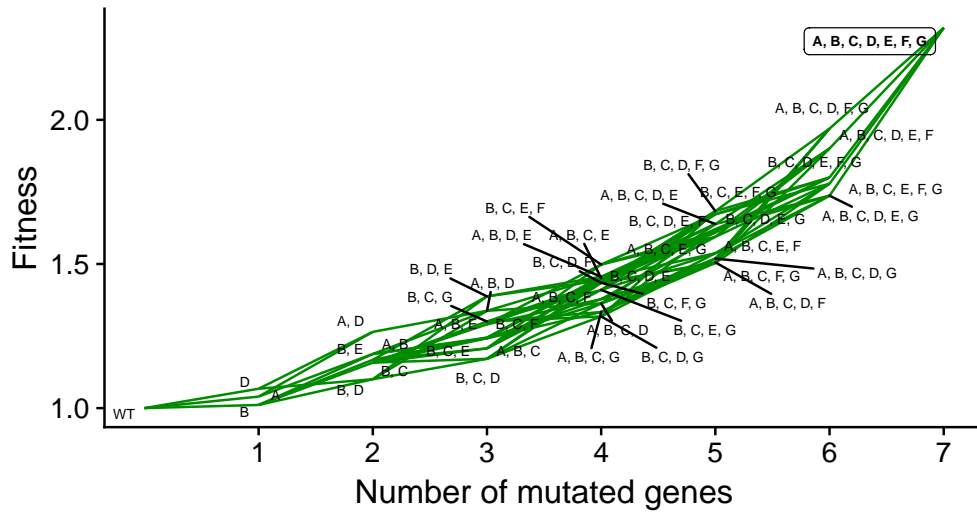

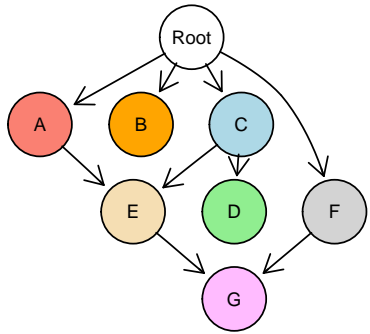

ID **gLwa1VINXzVMwea**  
 acc genotypes **36**  
 peaks no back **1**  
 removed edges **0**  
 prop rem edges **0**

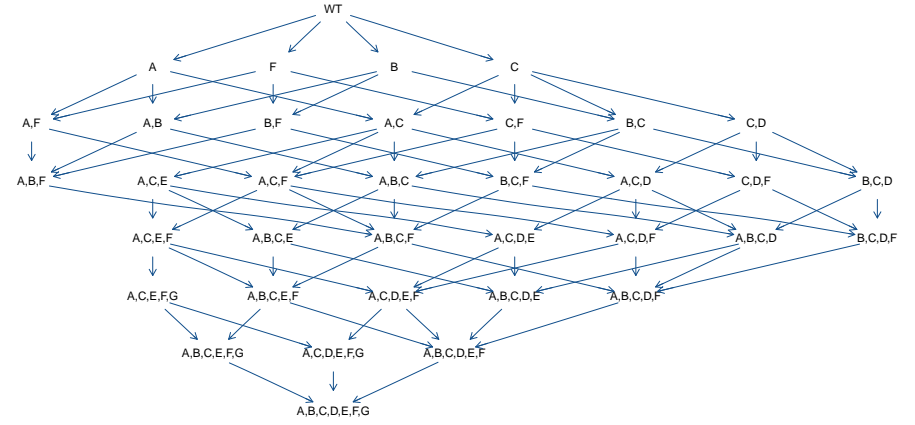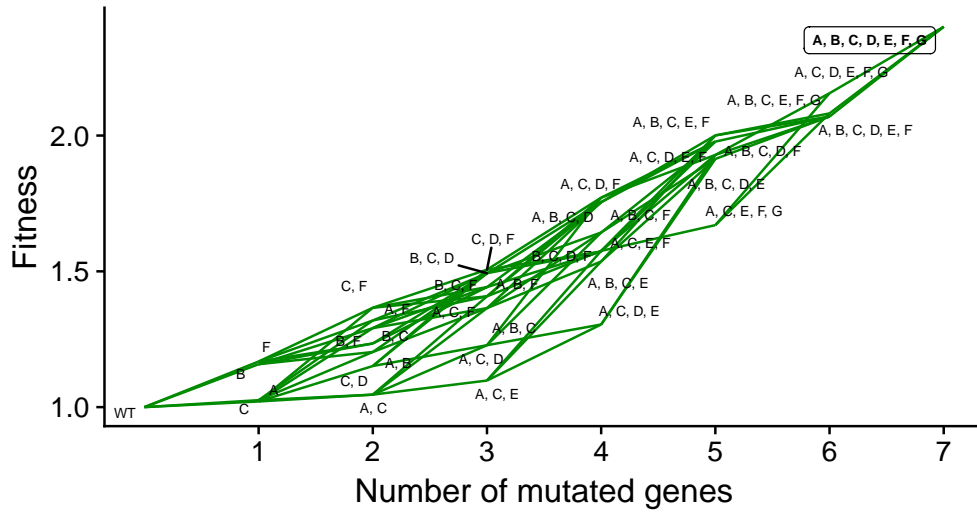

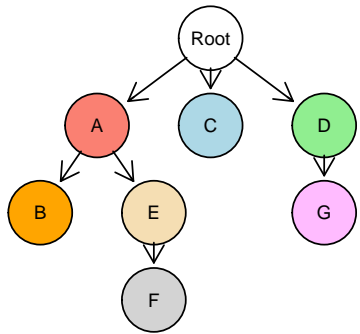

ID Gn2HkZc73V1xJWfm  
 acc genotypes 42  
 peaks no back 1  
 removed edges 0  
 prop rem edges 0

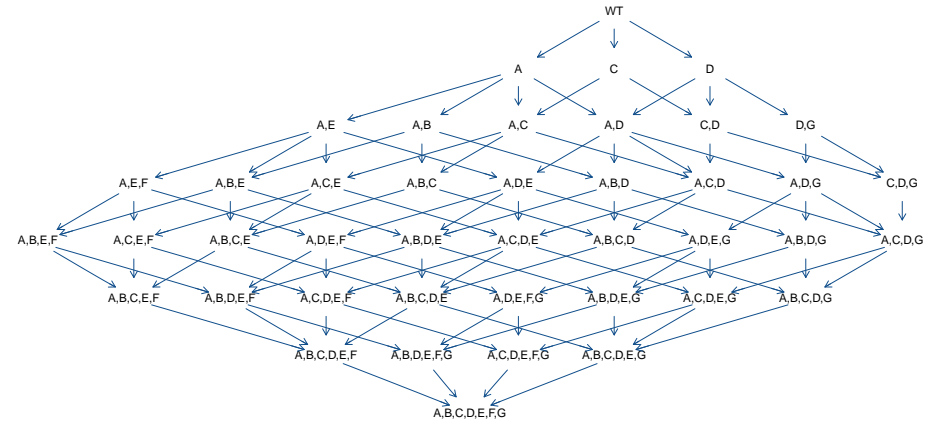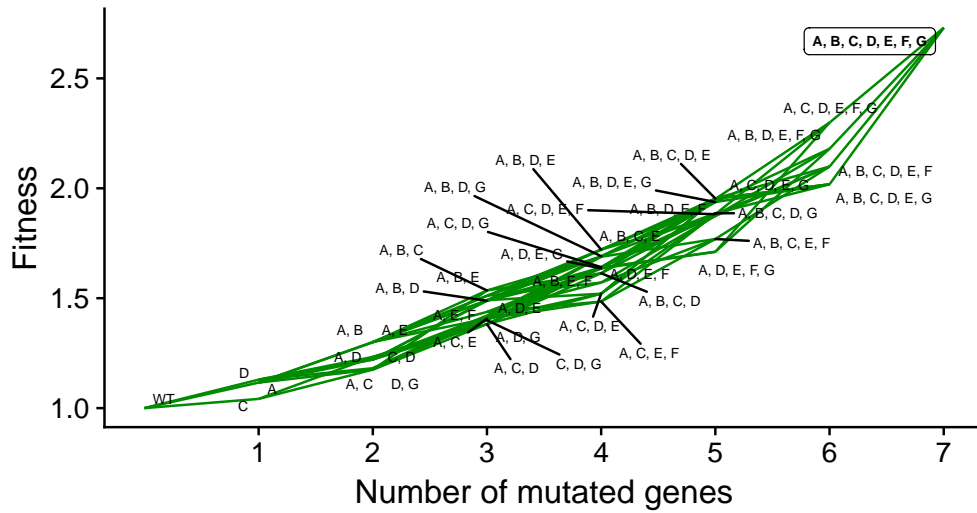

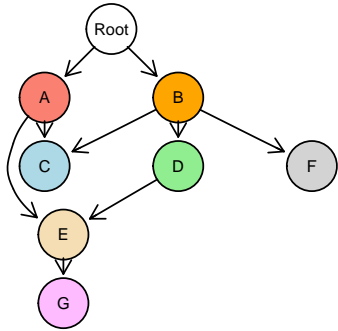

ID GNq25Sjl71oPTH7O  
 acc genotypes 22  
 peaks no back 1  
 removed edges 0  
 prop rem edges 0

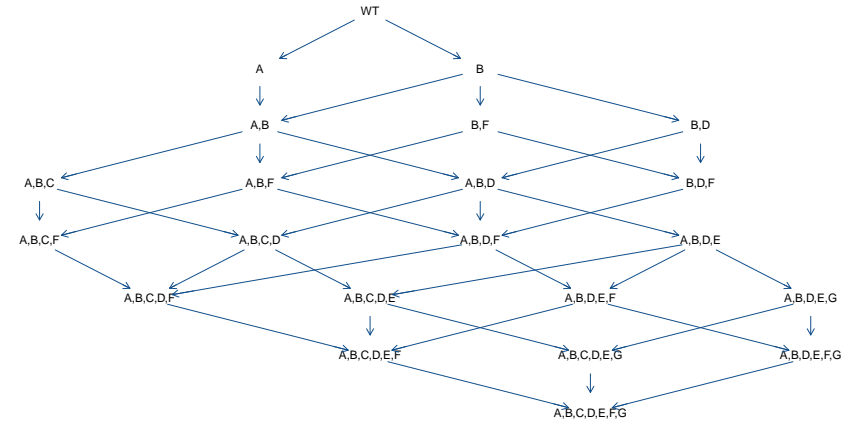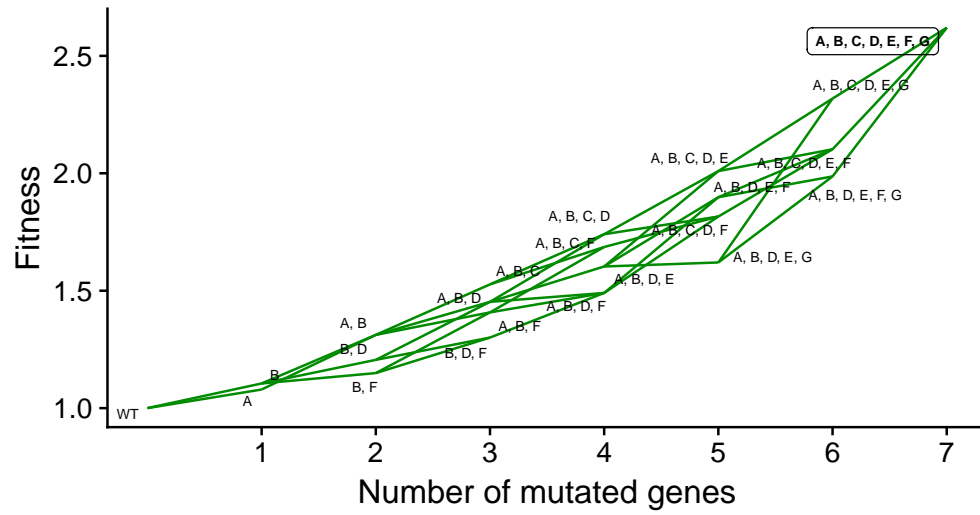

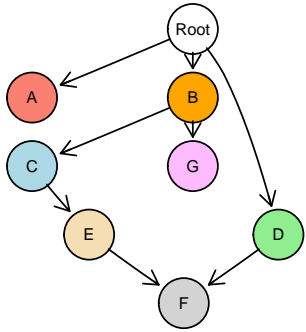

ID [gNsBkqVxNevMiAxL](#)  
 acc genotypes 32  
 peaks no back 1  
 removed edges 0  
 prop rem edges 0

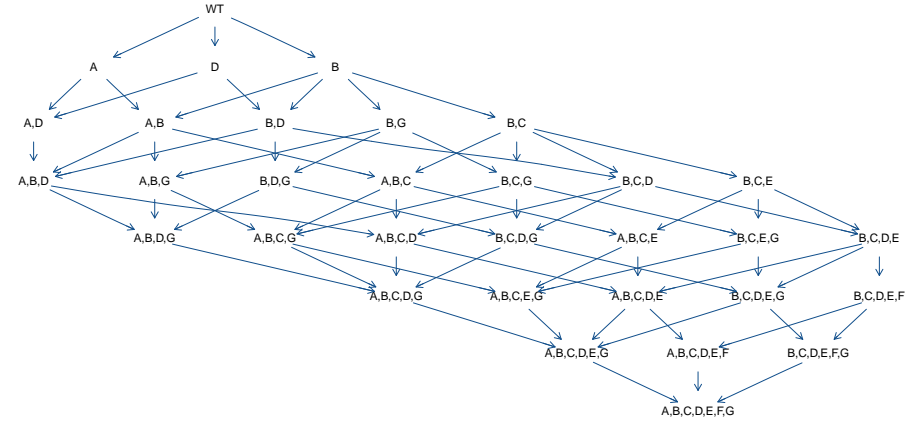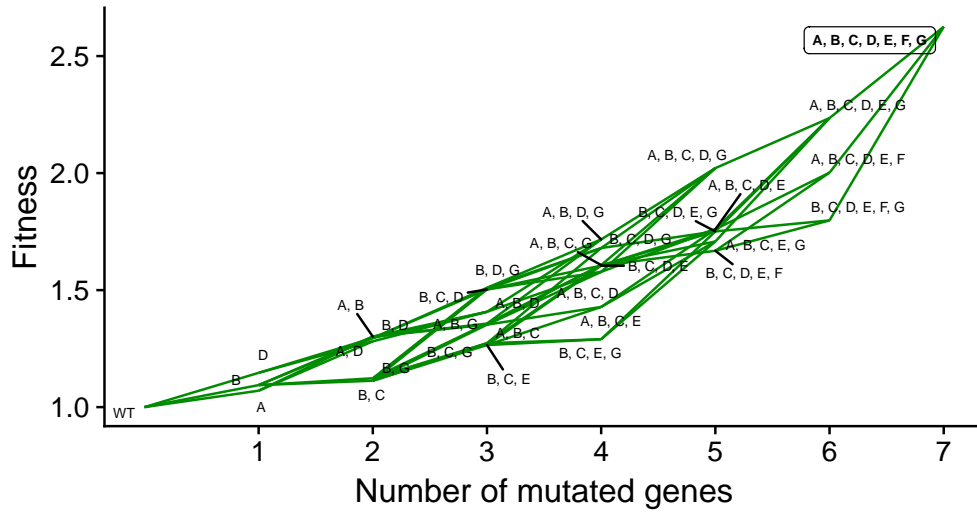

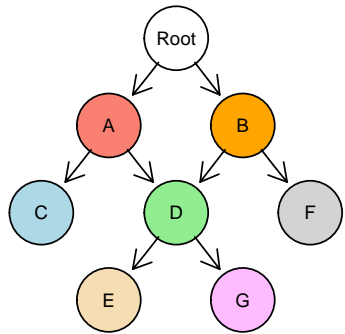

ID **Gp543eGHWygA1P8H**  
 acc genotypes **25**  
 peaks no back **1**  
 removed edges **0**  
 prop rem edges **0**

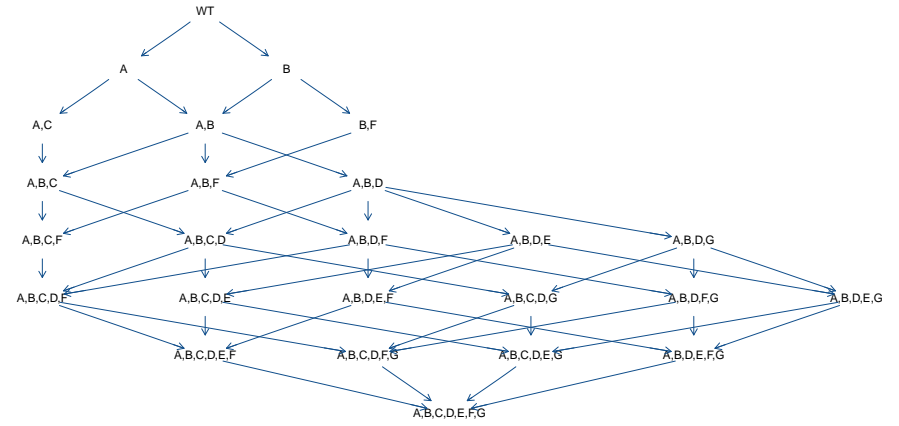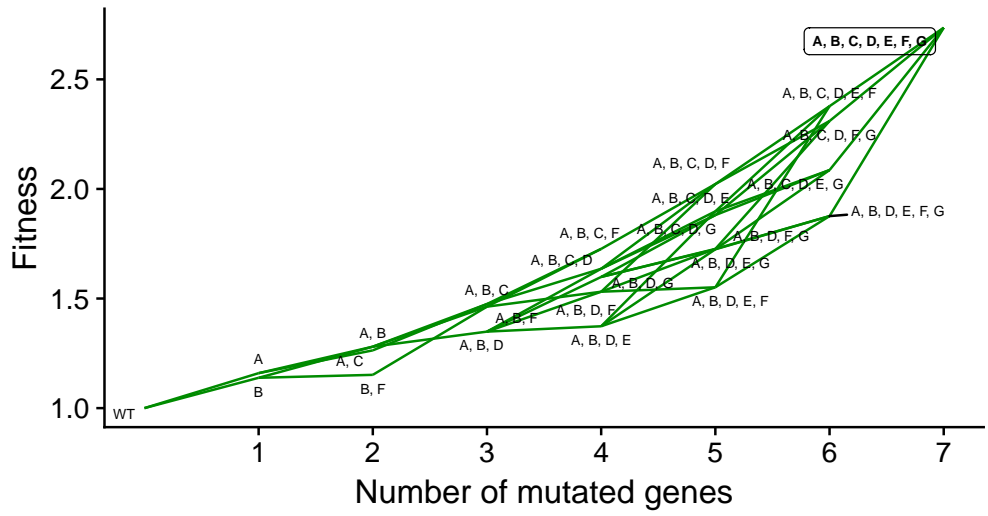

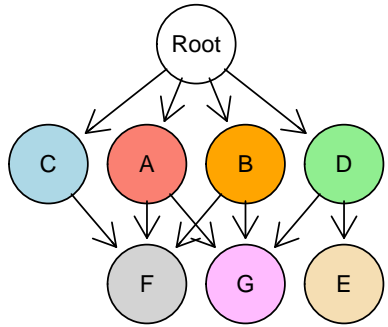

ID [gtuJ3IZP3MzeoW31](#)  
 acc genotypes 33  
 peaks no back 1  
 removed edges 0  
 prop rem edges 0

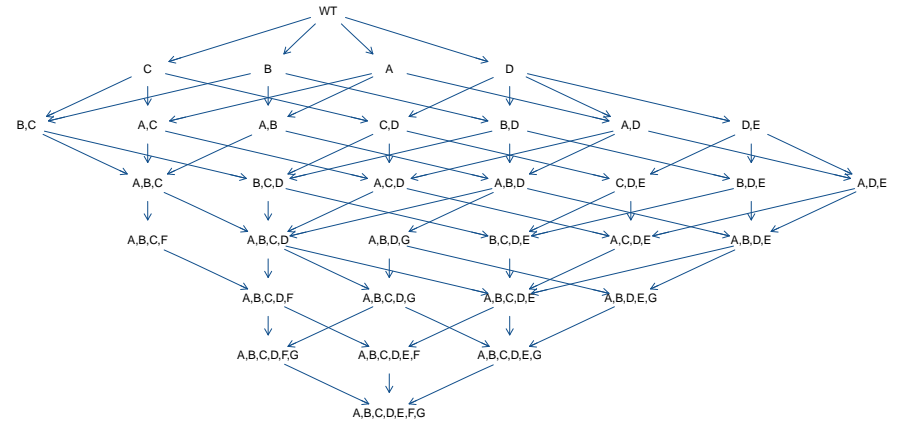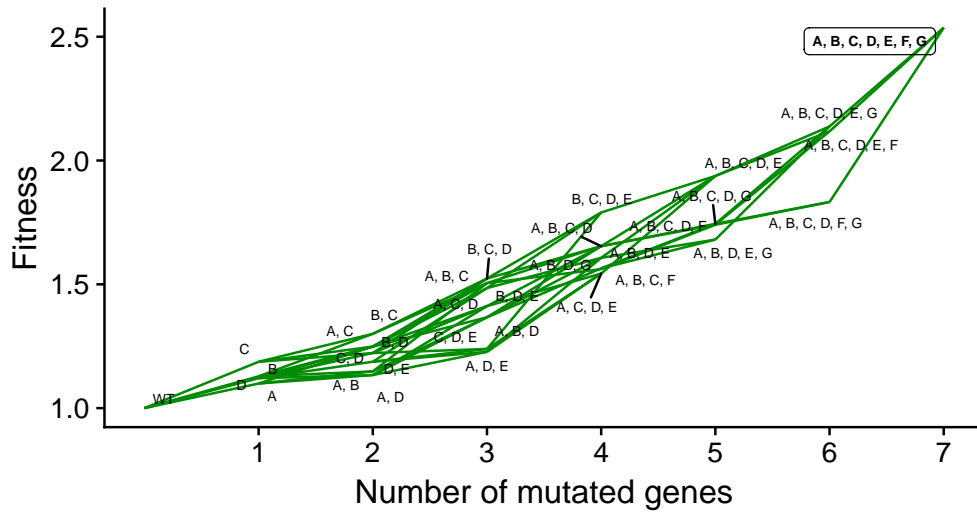

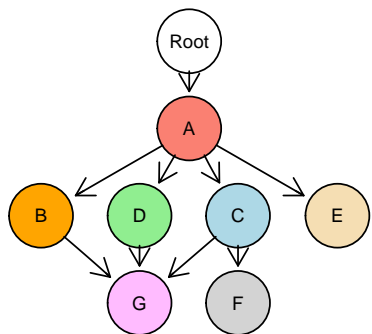

ID [GyBZiyDvewoQU6ri](#)  
 acc genotypes 29  
 peaks no back 1  
 removed edges 0  
 prop rem edges 0

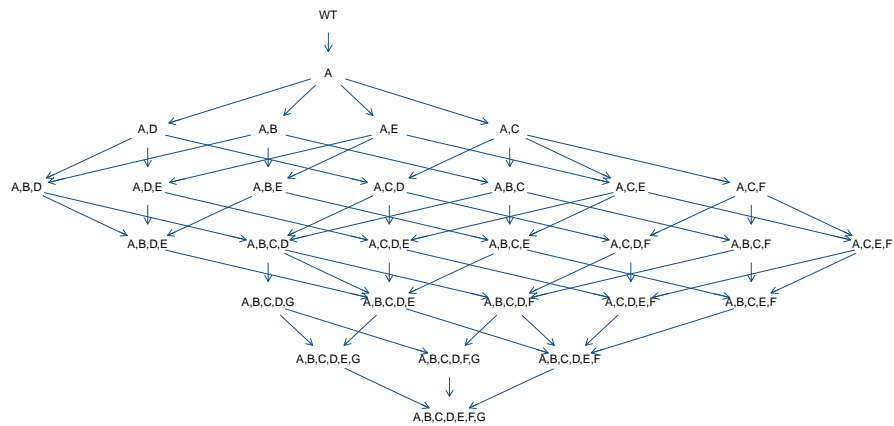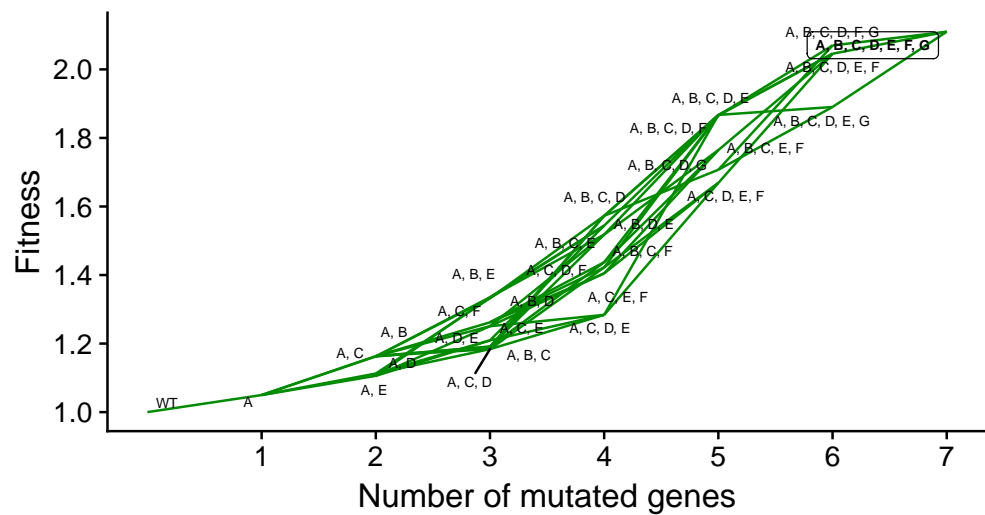



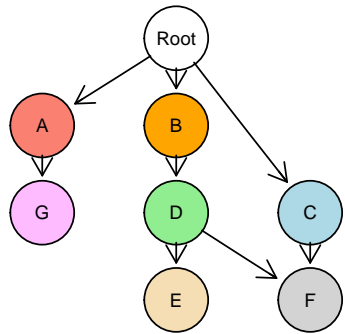

ID h5XuDSnadWt672QY  
 acc genotypes 30  
 peaks no back 1  
 removed edges 0  
 prop rem edges 0

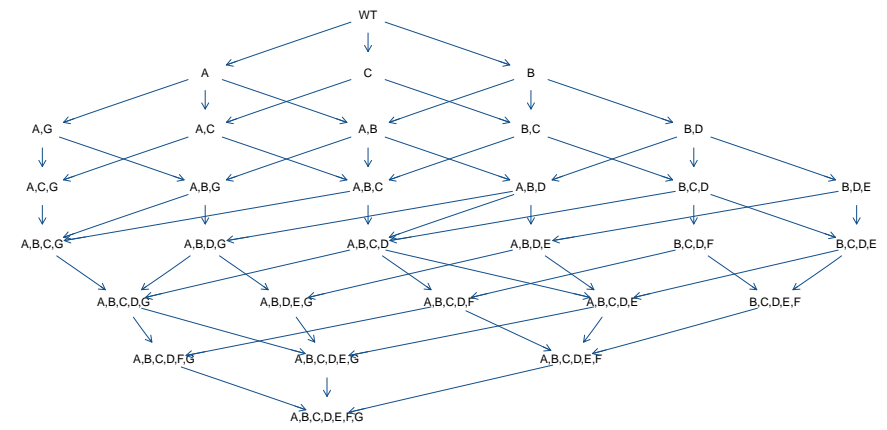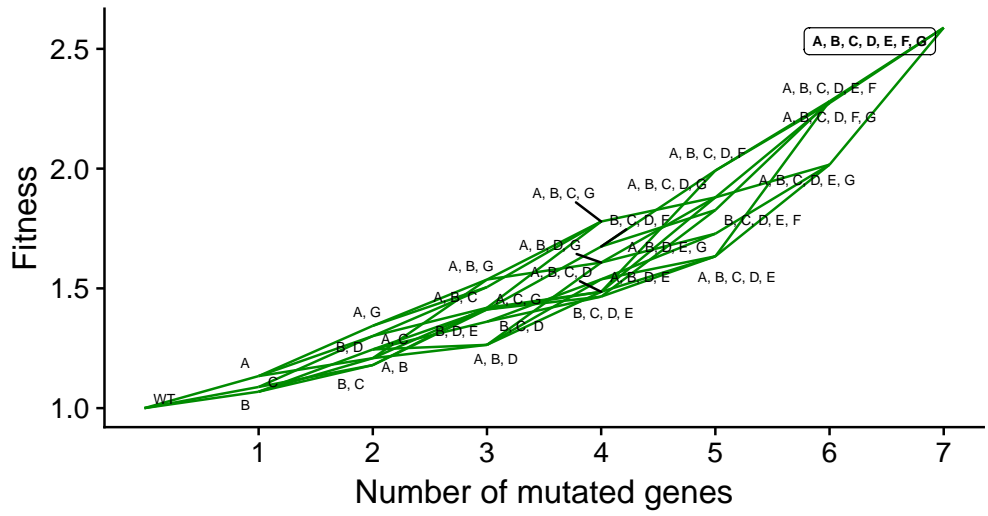

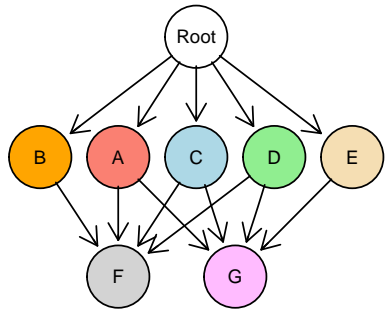

ID **h88O5DNbc34DtJRM**  
 acc genotypes **37**  
 peaks no back 1  
 removed edges 0  
 prop rem edges 0

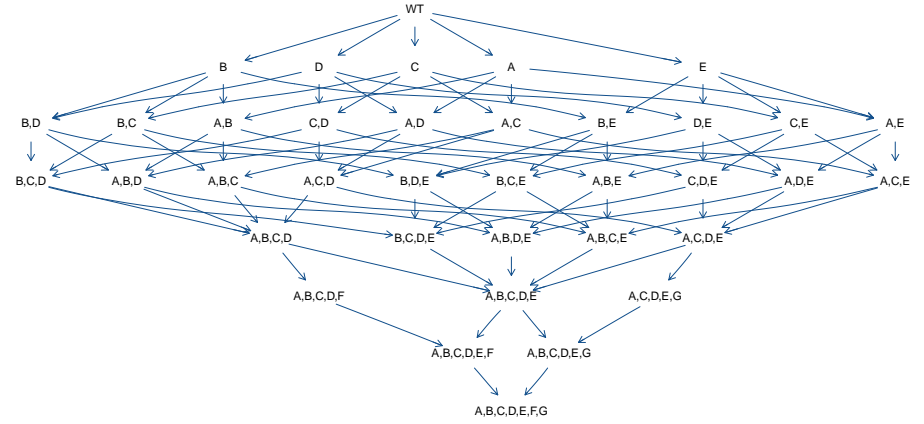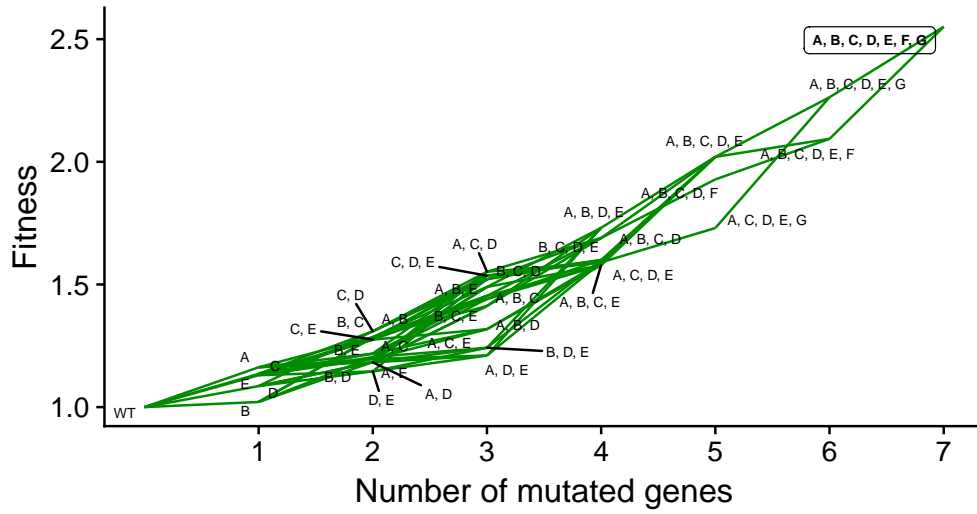

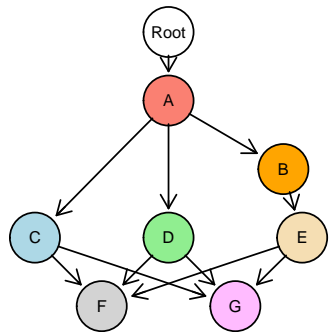

ID **Hbk7A4ZWDH110S**  
 acc genotypes **16**  
 peaks no back **1**  
 removed edges **0**  
 prop rem edges **0**

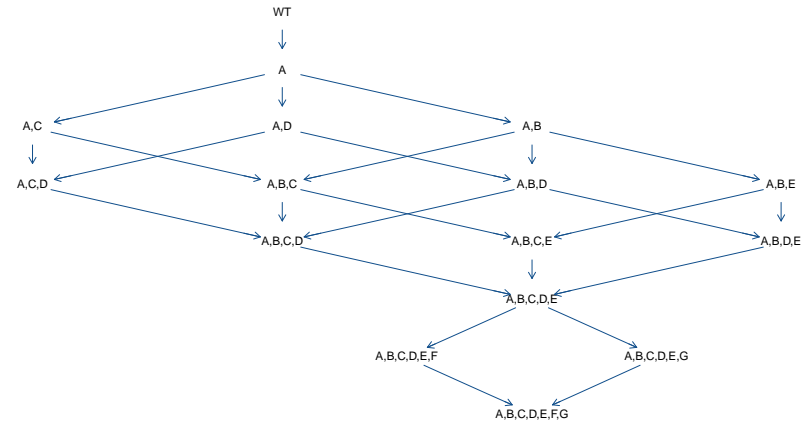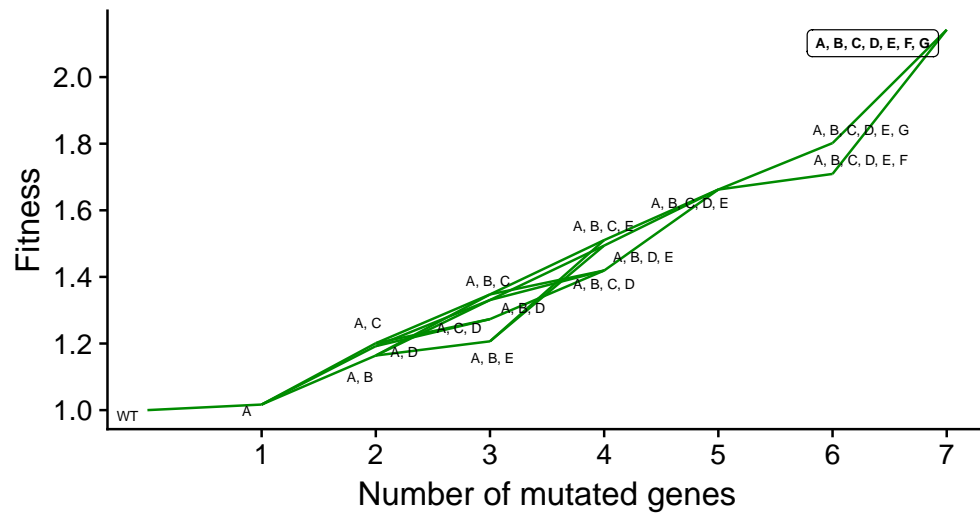

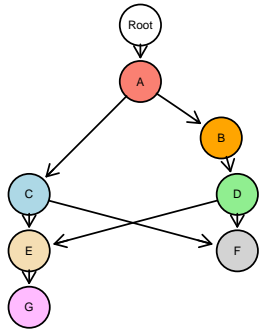

ID **HCfuosyRn2Mnwy2Y**  
 acc genotypes **12**  
 peaks no back 1  
 removed edges 0  
 prop rem edges 0

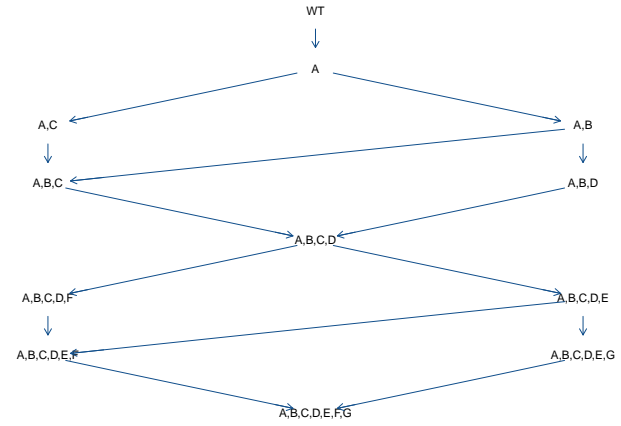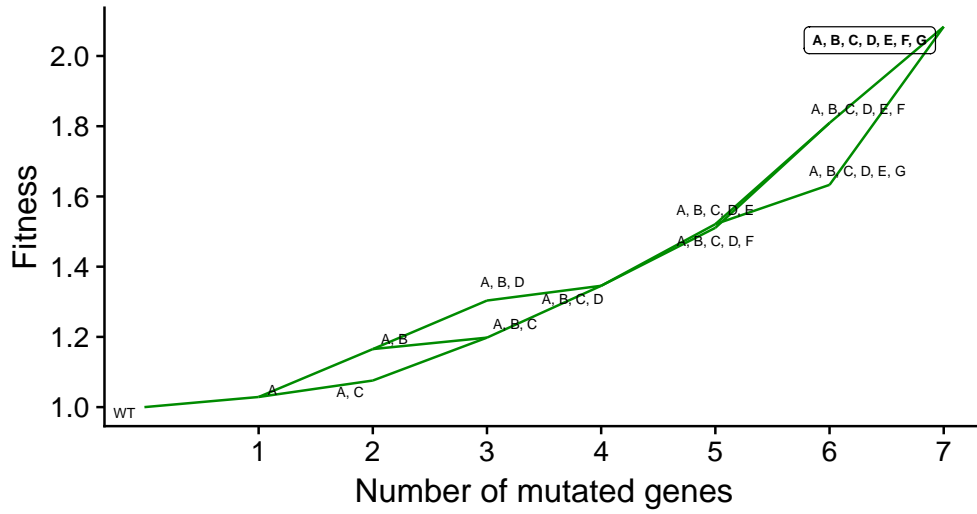

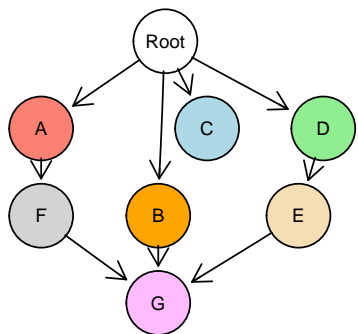

ID **hEFL8MoVyBIRoMA**  
 acc genotypes **38**  
 peaks no back 1  
 removed edges 0  
 prop rem edges 0

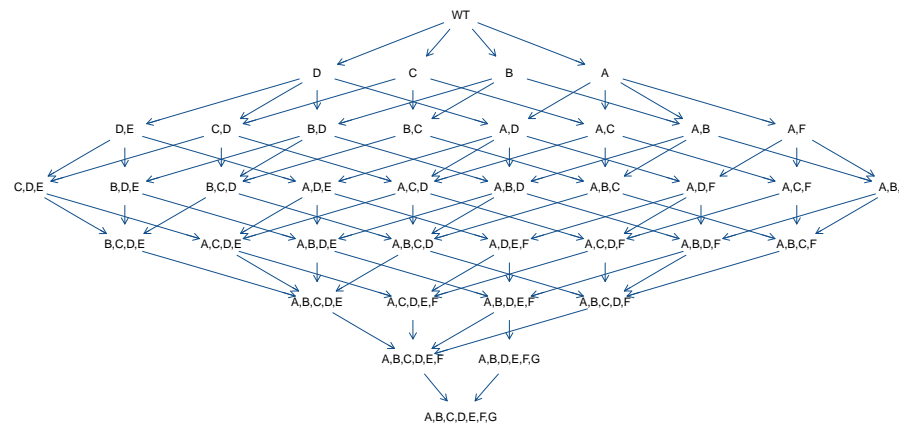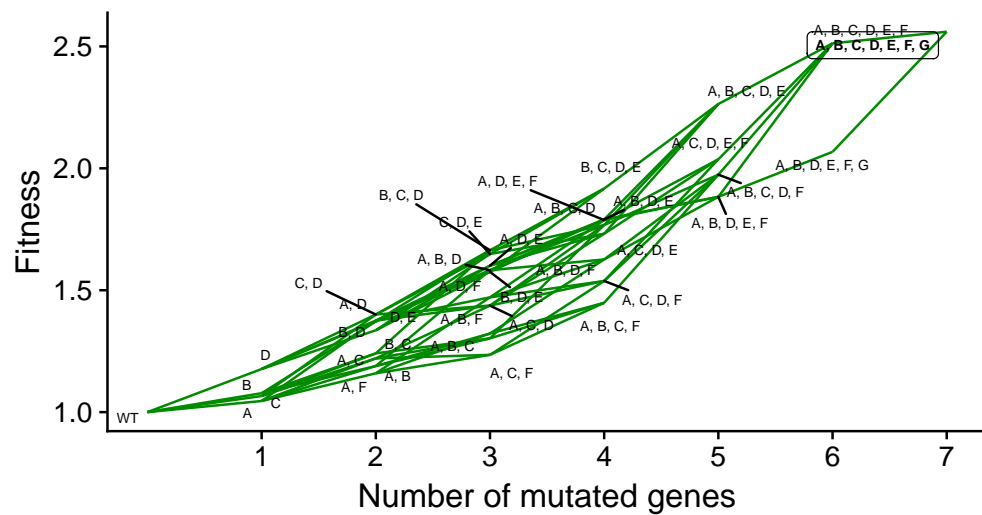

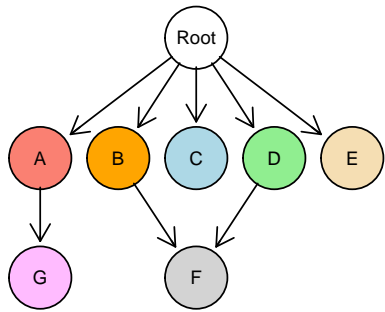

ID HF510IGzHhUvaK1Wc  
 acc genotypes 60  
 peaks no back 1  
 removed edges 0  
 prop rem edges 0

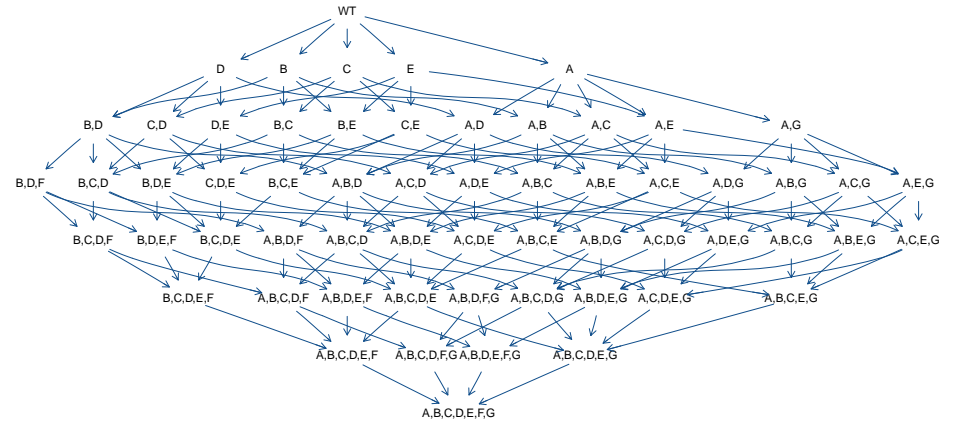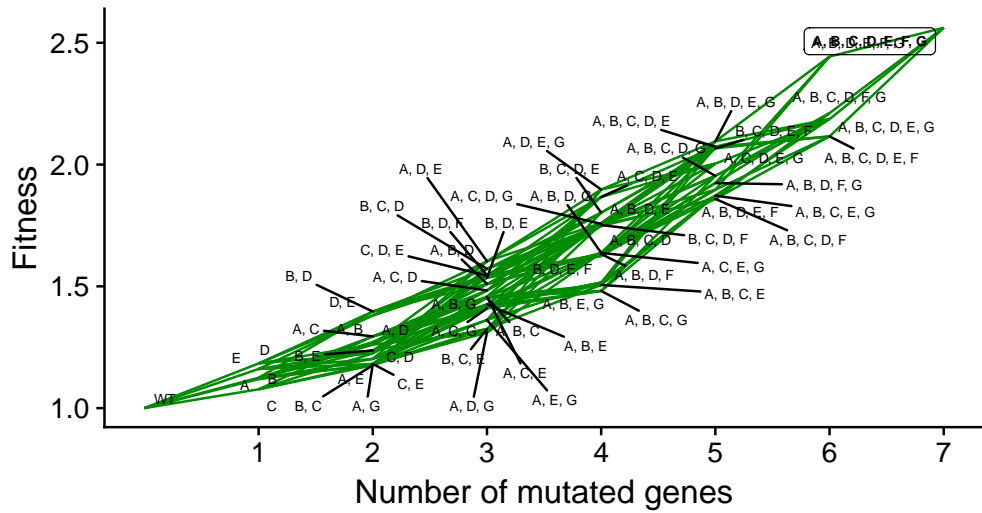

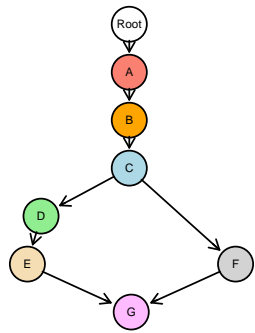

ID **HfNvtnFRbnBZJbsa**  
 acc genotypes **10**  
 peaks no back 1  
 removed edges 0  
 prop rem edges 0

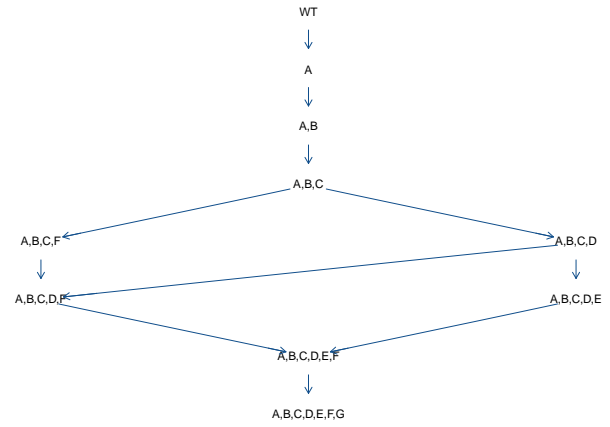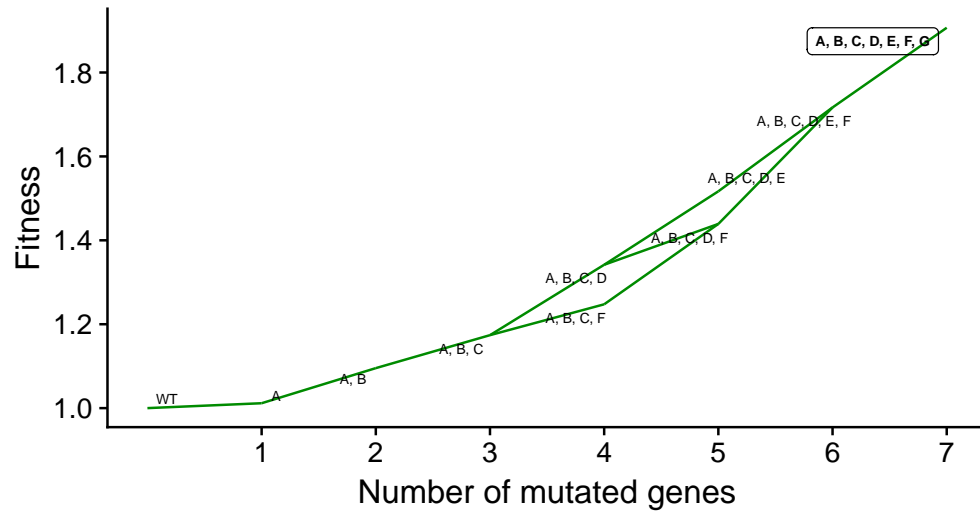

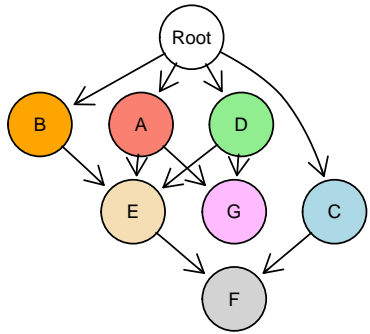

ID **HGZXE3cU1tol8NwB**  
 acc genotypes **26**  
 peaks no back **1**  
 removed edges **0**  
 prop rem edges **0**

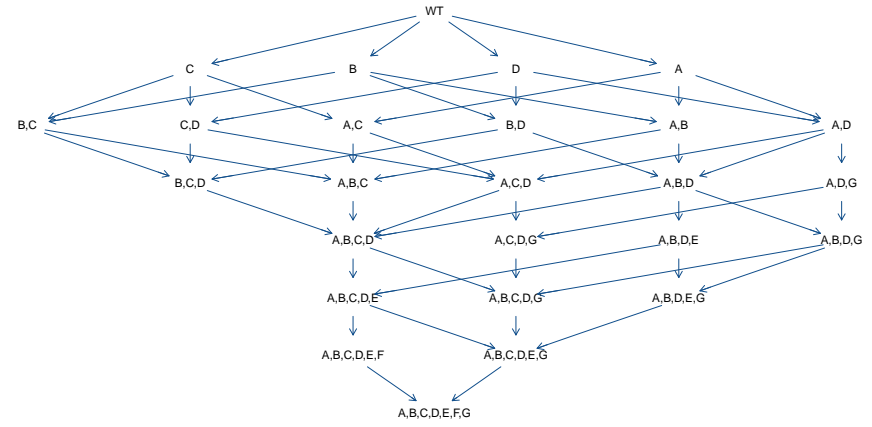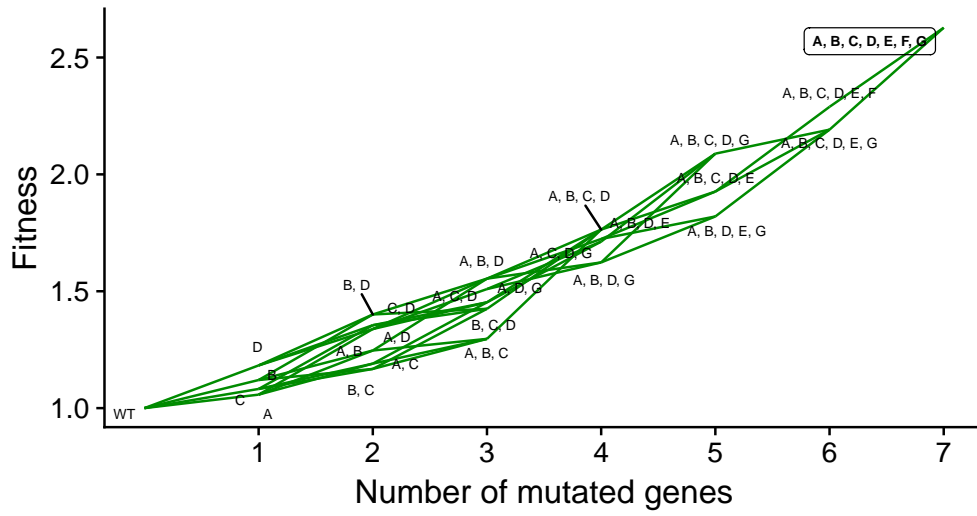



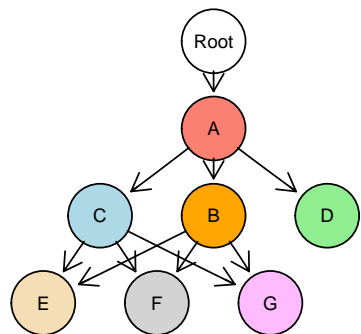

ID **HhTnaJyFFi4y9PtX**  
 acc genotypes **23**  
 peaks no back 1  
 removed edges 0  
 prop rem edges 0

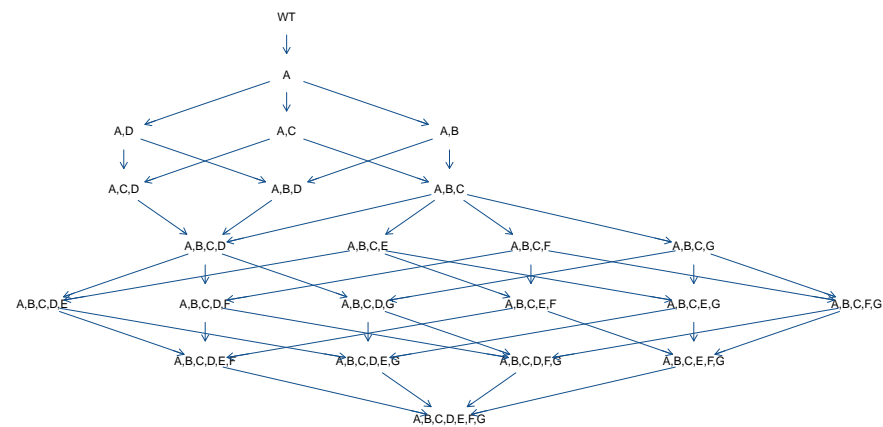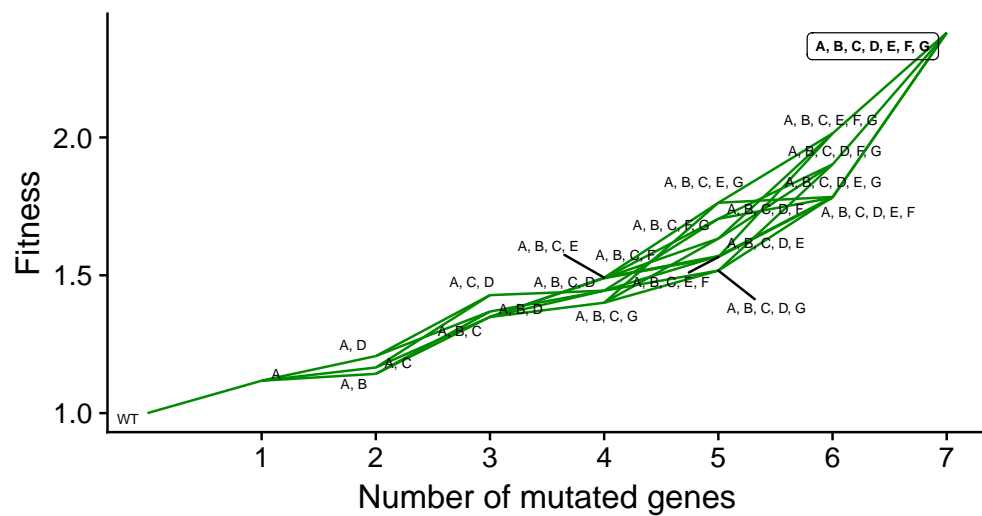

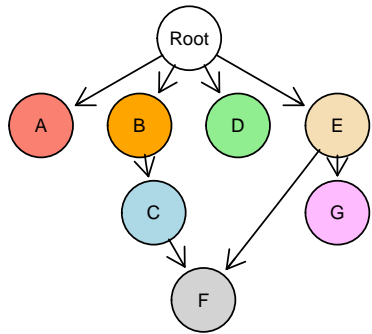

ID [hiqO72oQ9p210Vxcp](#)  
 acc genotypes 44  
 peaks no back 1  
 removed edges 0  
 prop rem edges 0

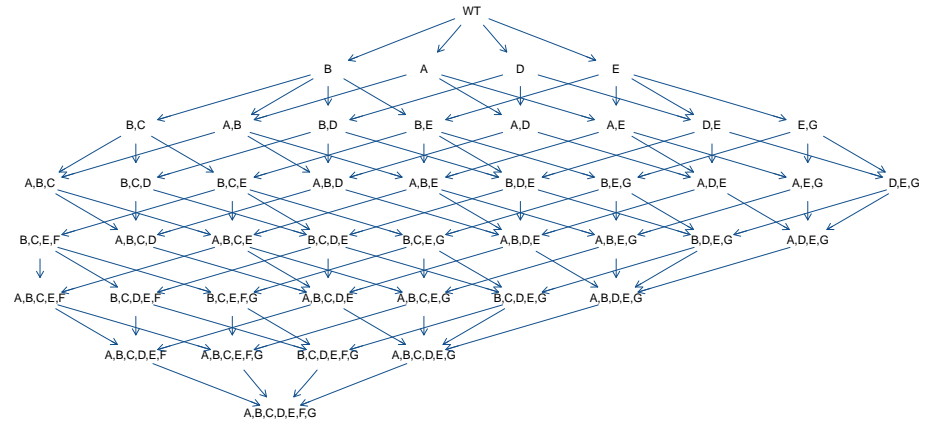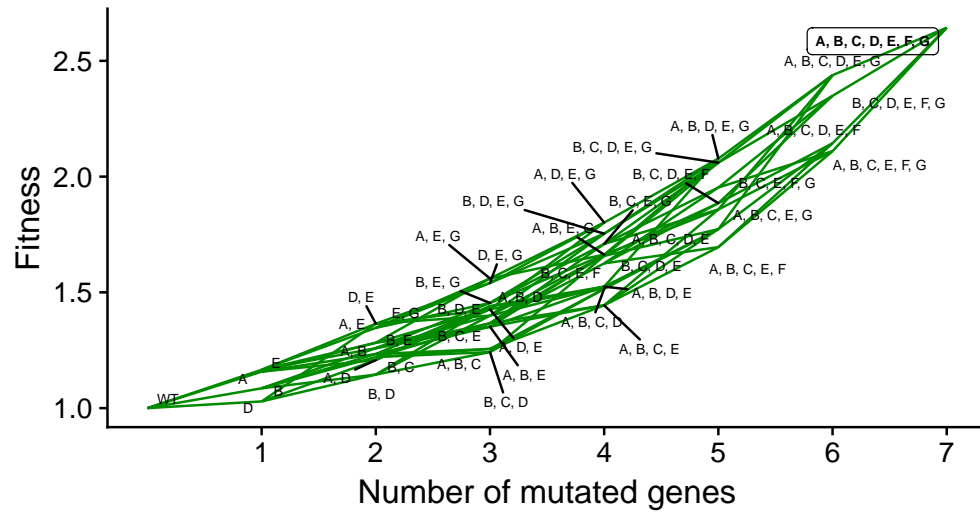



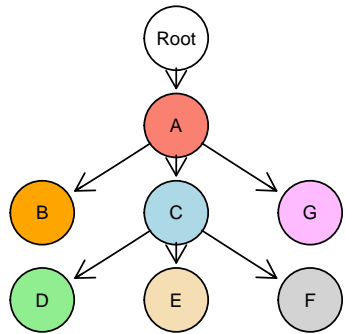

ID **hyGvt7bXxXmlBy4c**  
 acc genotypes **37**  
 peaks no back 1  
 removed edges 0  
 prop rem edges 0

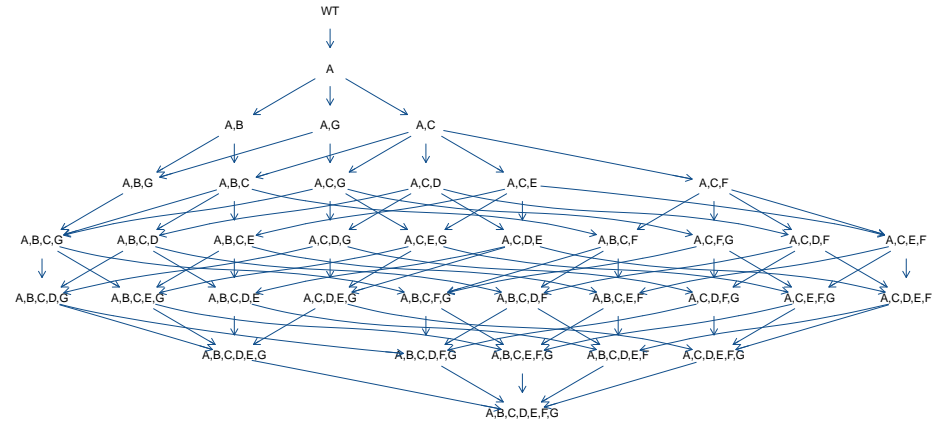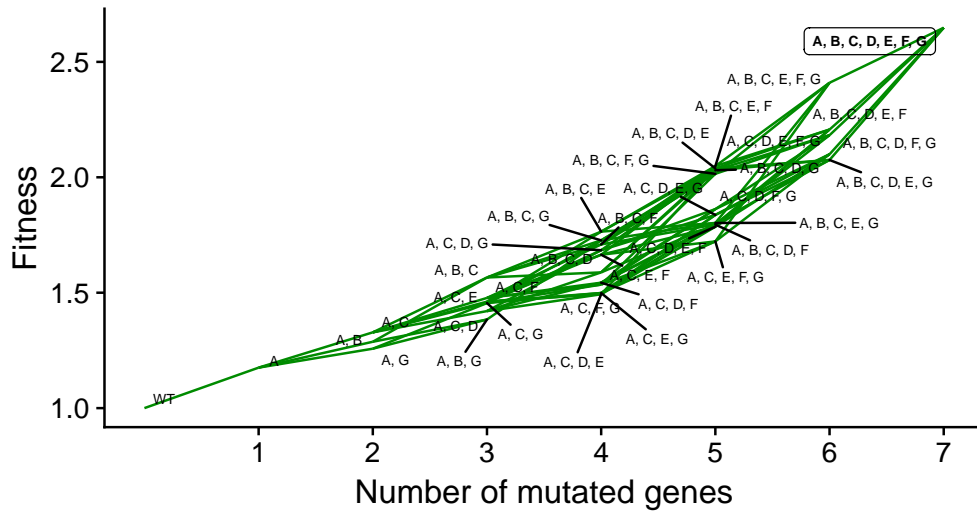

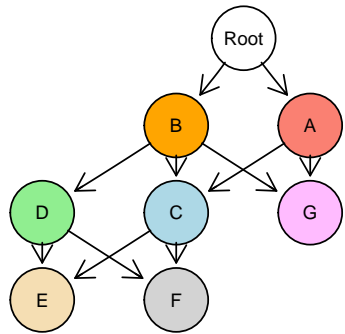

ID HyyO10PwiQqDuWK2r  
 acc genotypes 18  
 peaks no back 1  
 removed edges 0  
 prop rem edges 0

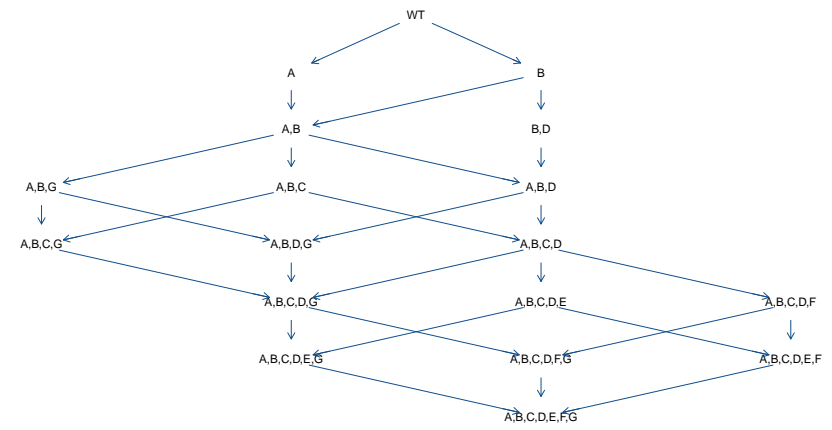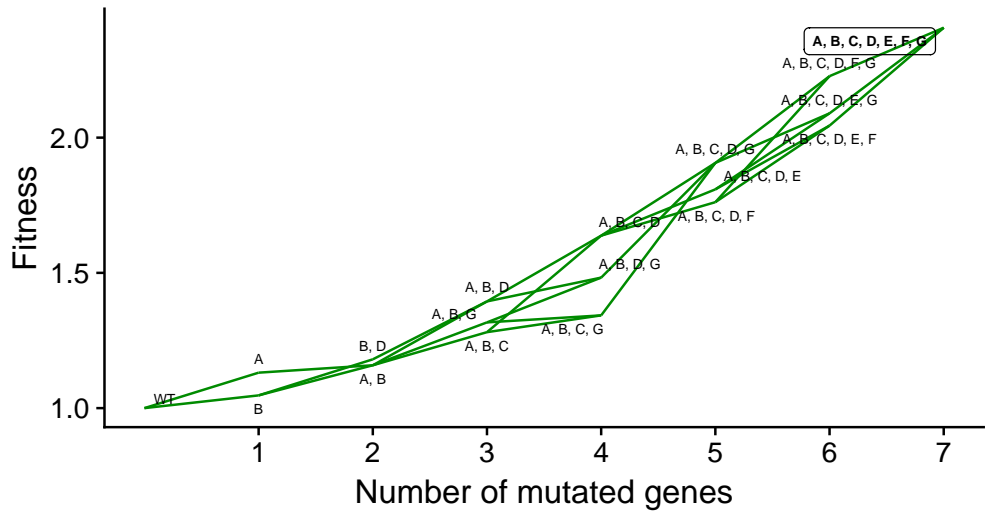

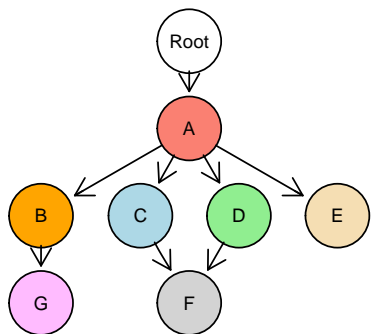

ID IFOFBmVbzrLBfqR1  
 acc genotypes 31  
 peaks no back 1  
 removed edges 0  
 prop rem edges 0

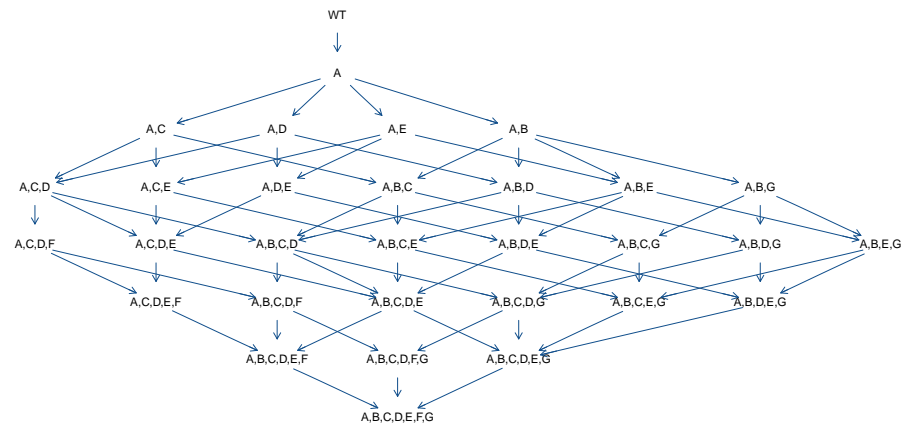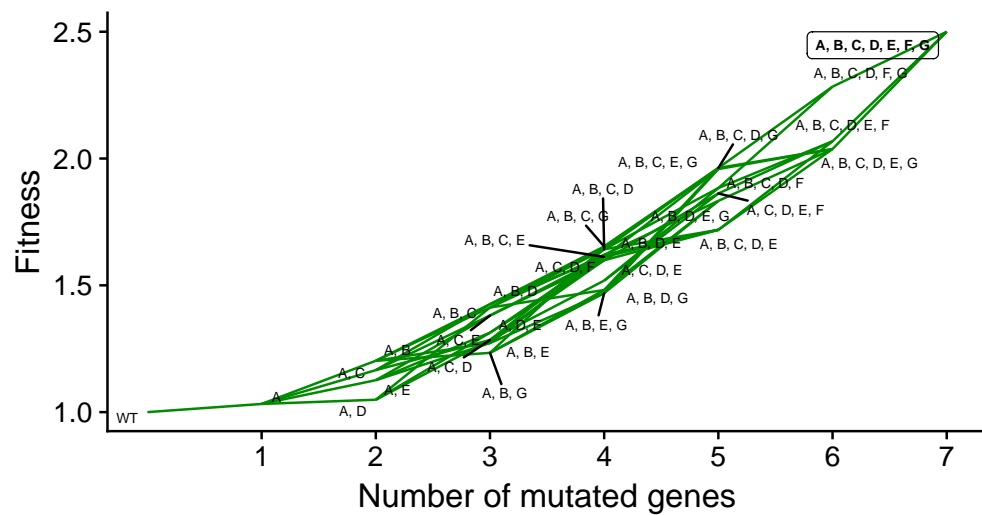

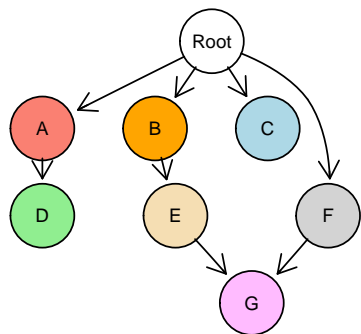

ID **J15PYr1XTbhonDL**  
 acc genotypes **42**  
 peaks no back **1**  
 removed edges **0**  
 prop rem edges **0**

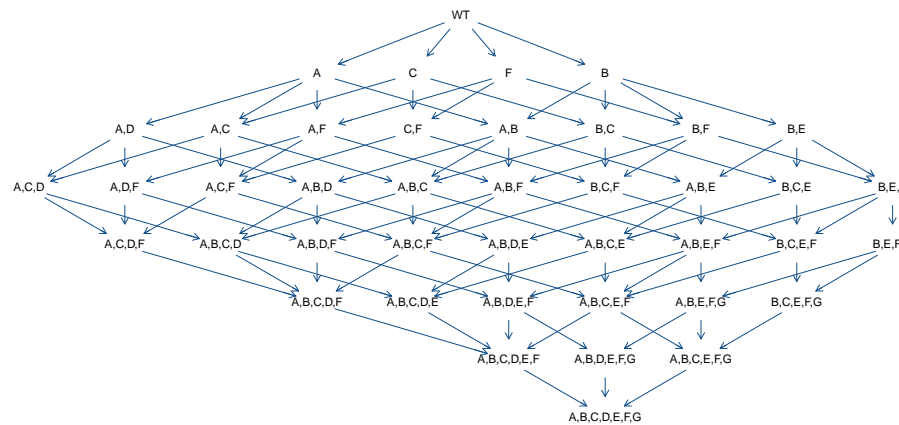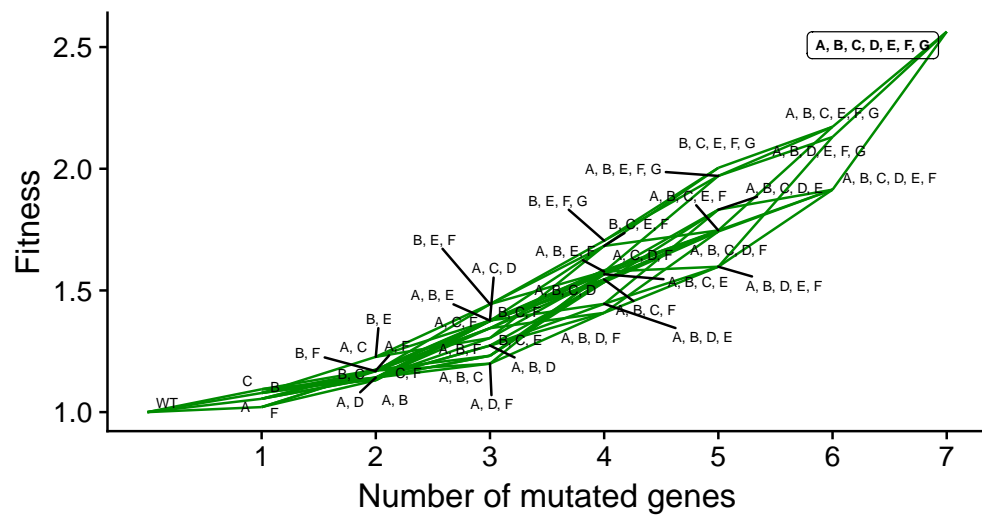

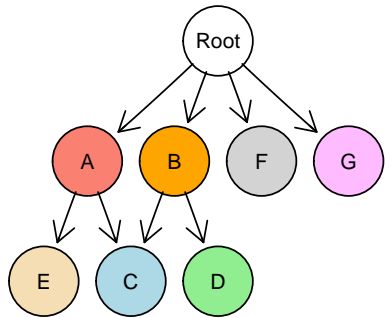

ID **iKHz2mPyuFYjaiPo**  
 acc genotypes **52**  
 peaks no back **1**  
 removed edges **0**  
 prop rem edges **0**

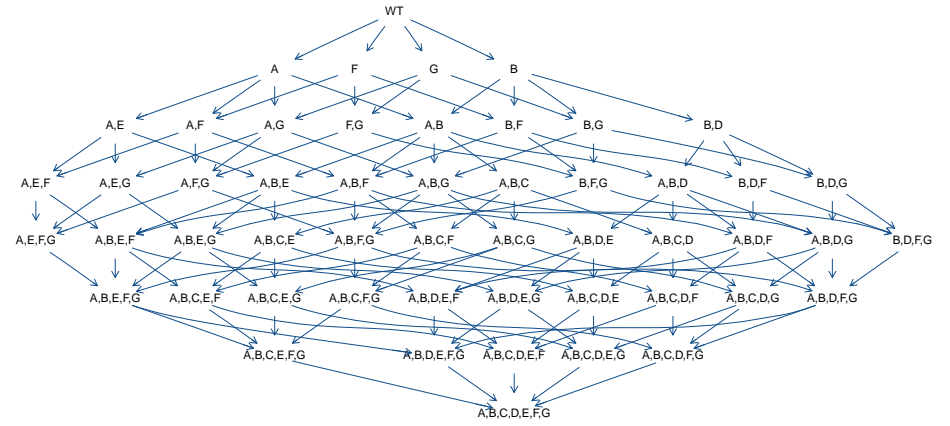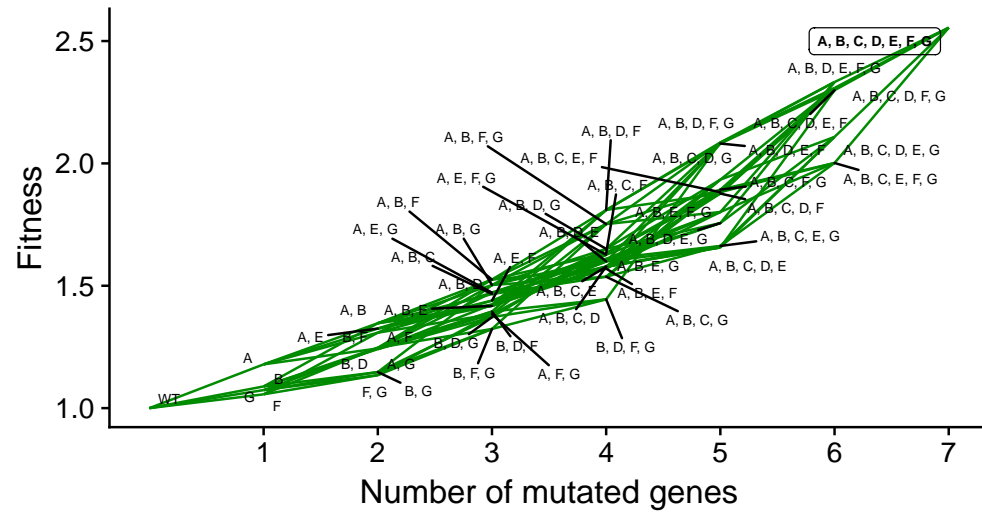



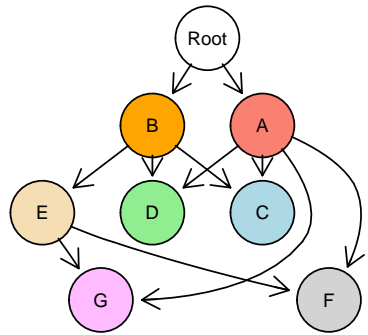

ID **imGyloiov7jJGQPM**  
 acc genotypes **24**  
 peaks no back **1**  
 removed edges **0**  
 prop rem edges **0**

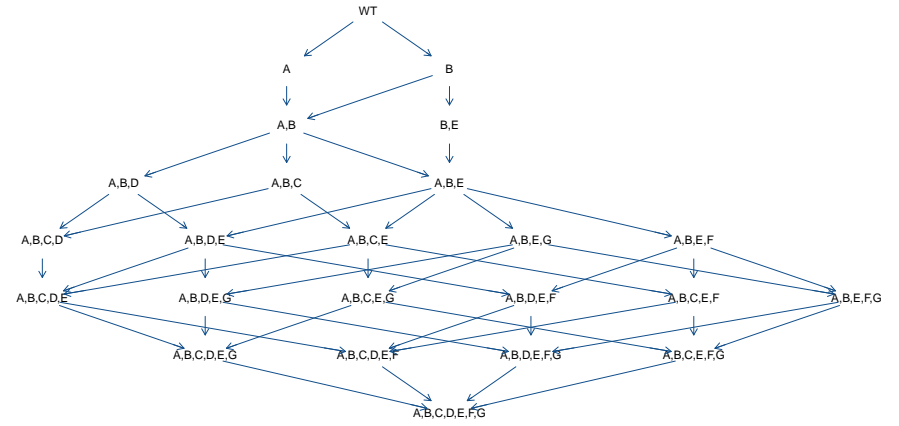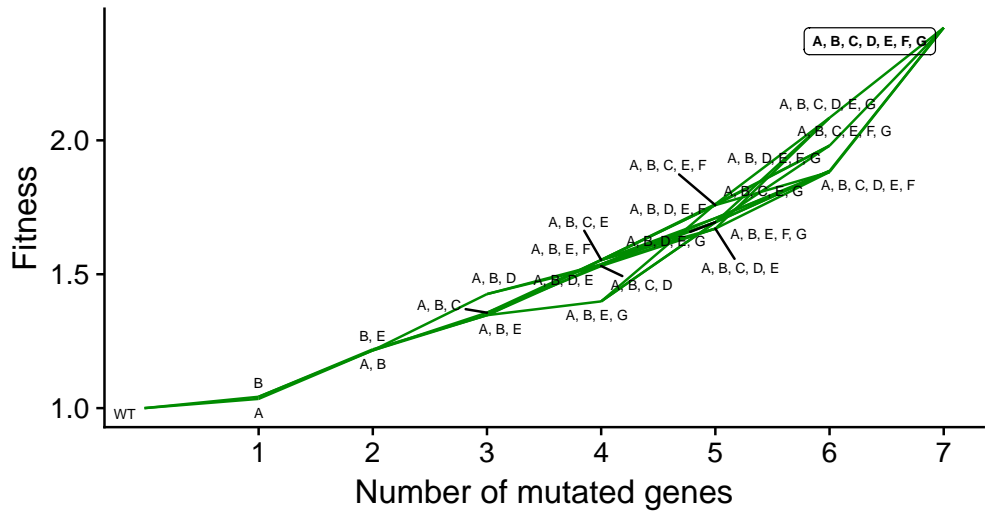

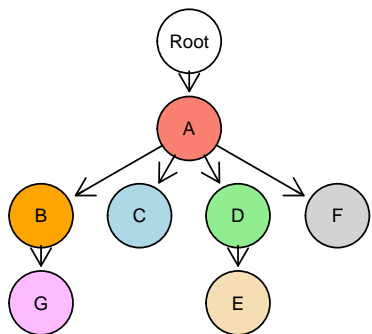

ID **lq2ILDZ3MG3ndder**  
 acc genotypes **37**  
 peaks no back 1  
 removed edges 0  
 prop rem edges 0

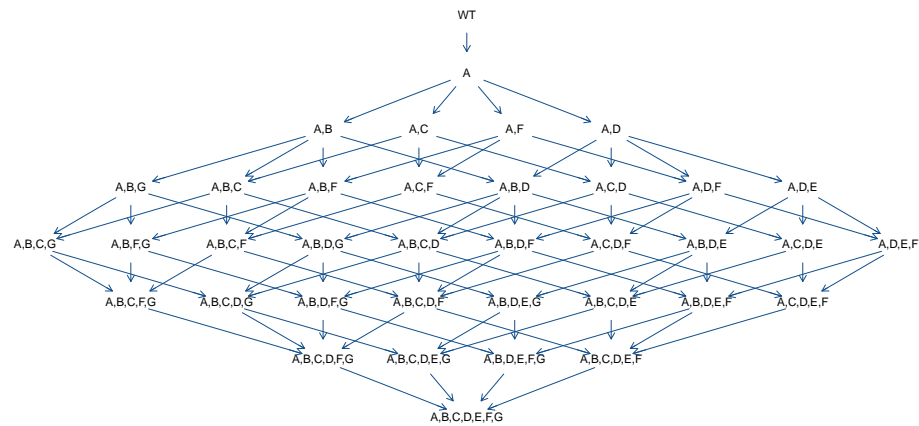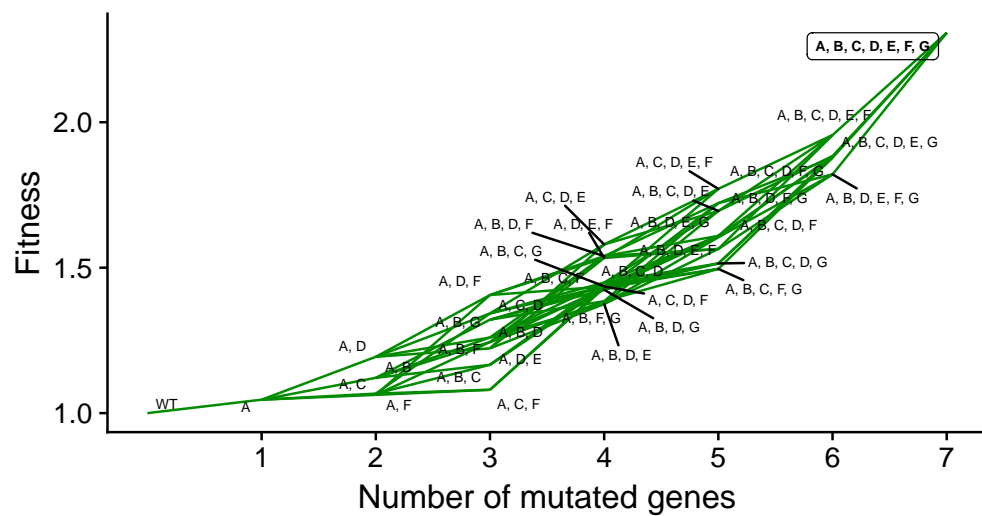

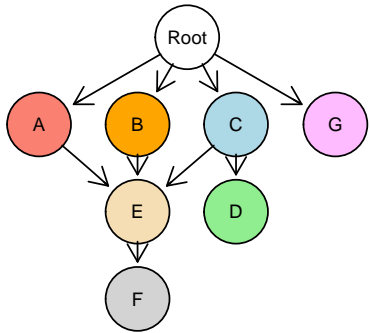

ID IRpnRnTLcDvmGnyE  
 acc genotypes 32  
 peaks no back 1  
 removed edges 0  
 prop rem edges 0

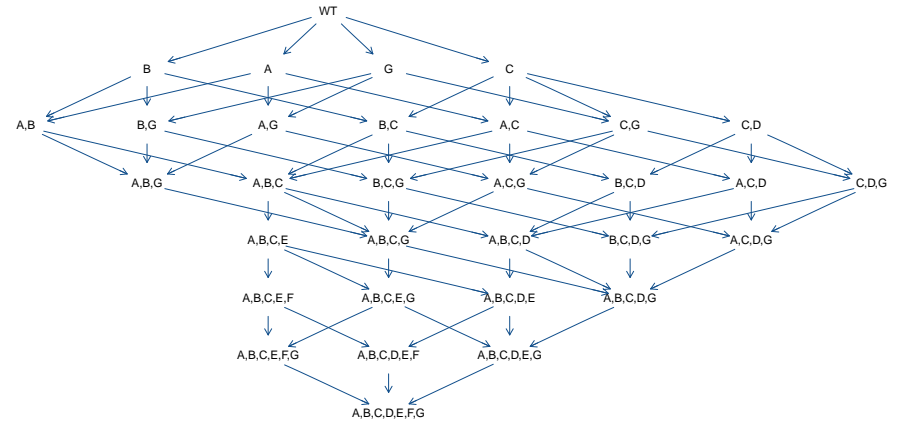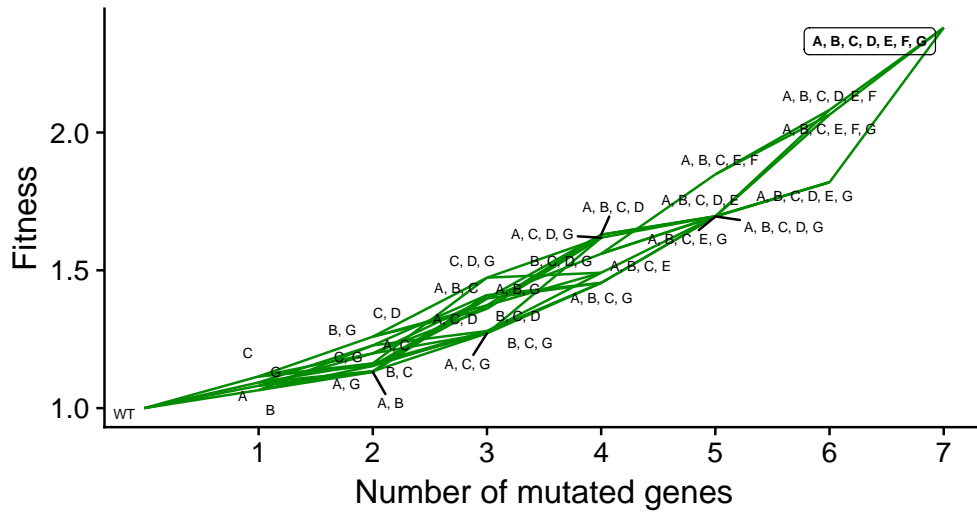

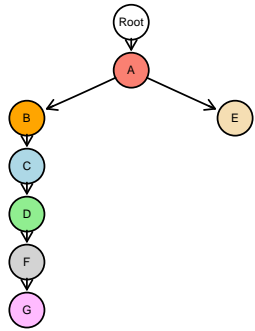

ID **iU2gBfqvhEyguOWr**  
 acc genotypes **13**  
 peaks no back 1  
 removed edges 0  
 prop rem edges 0

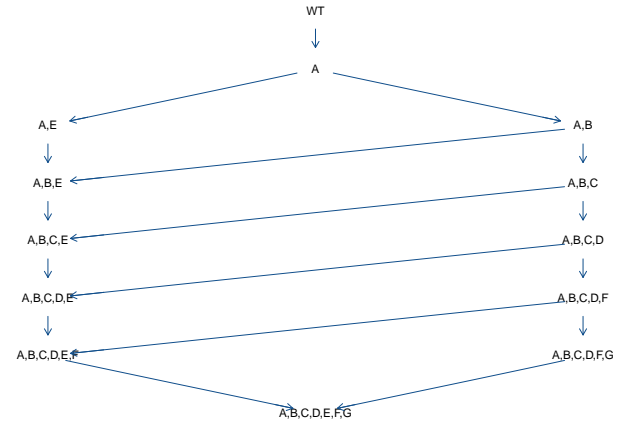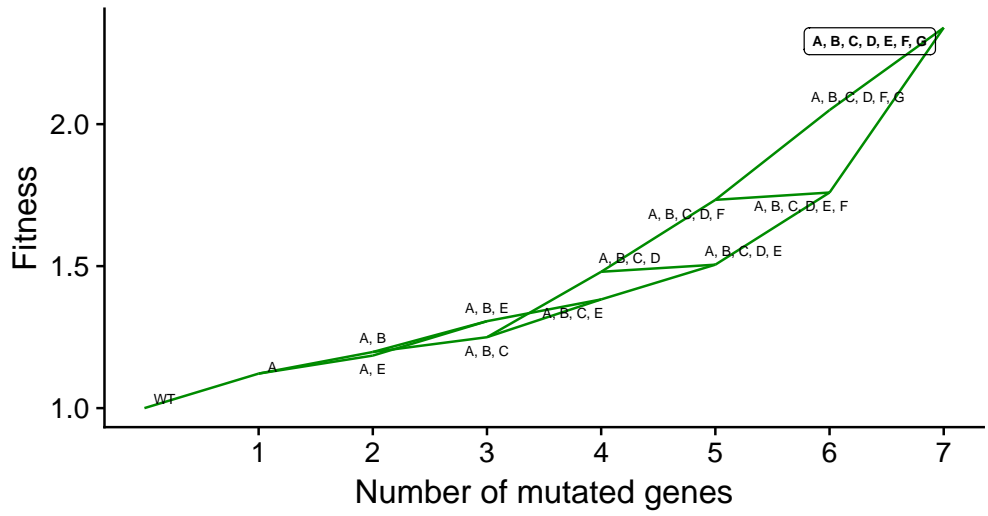

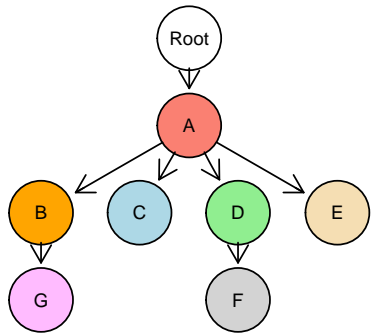

ID [lySPgbGJgYzQfV5k](#)  
 acc genotypes 37  
 peaks no back 1  
 removed edges 0  
 prop rem edges 0

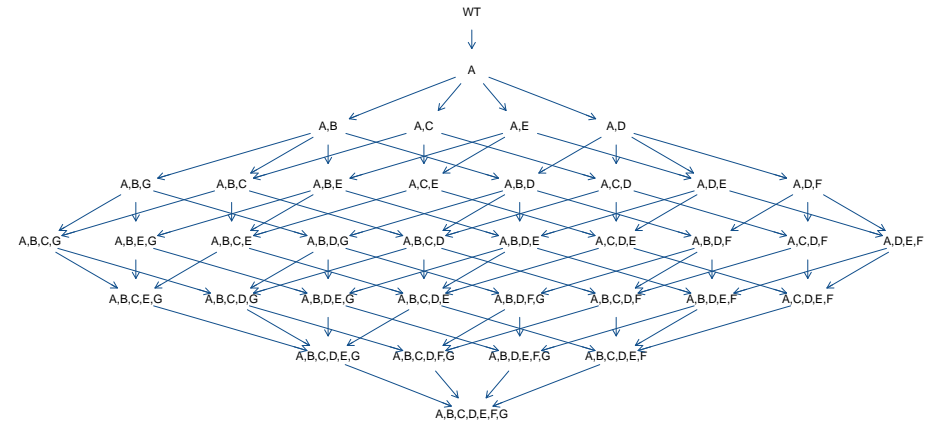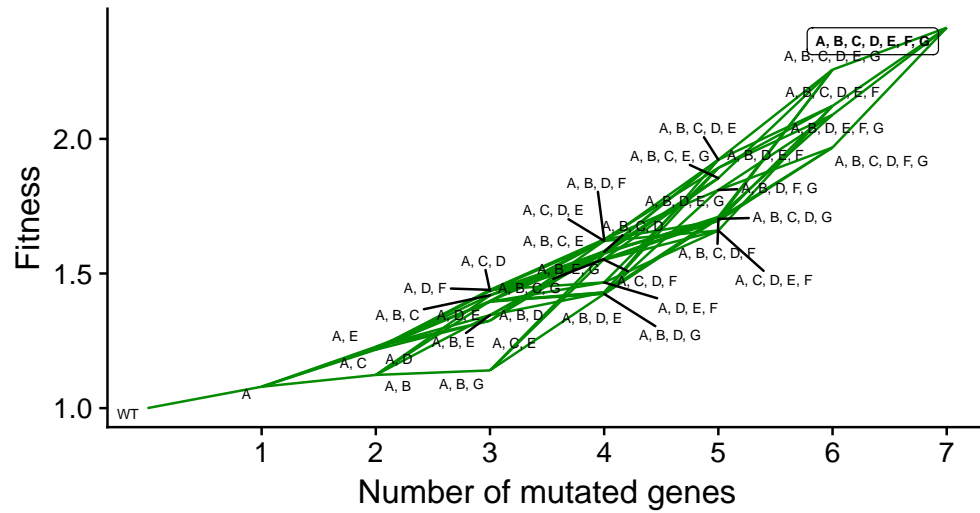

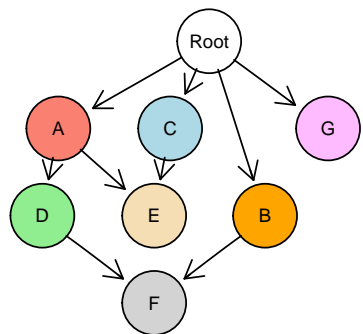

ID J5q7C41n6m4aEUp10  
 acc genotypes 38  
 peaks no back 1  
 removed edges 0  
 prop rem edges 0

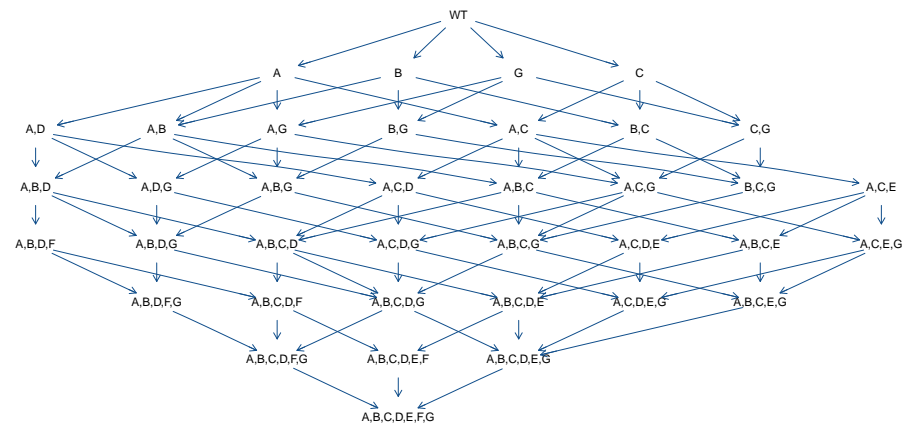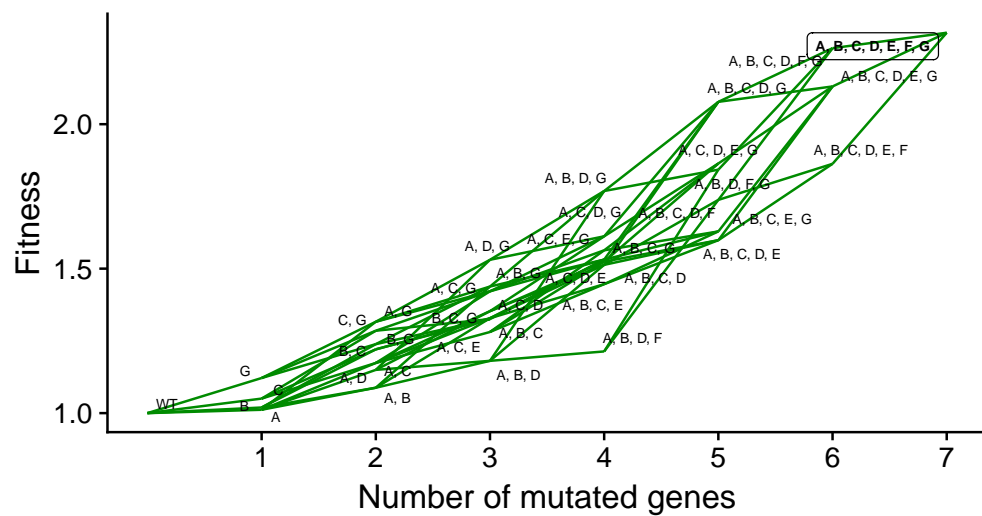

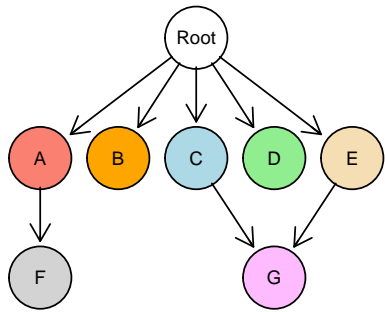

ID **j5YLGuLuDa6cvNb2**  
 acc genotypes **60**  
 peaks no back **1**  
 removed edges **0**  
 prop rem edges **0**

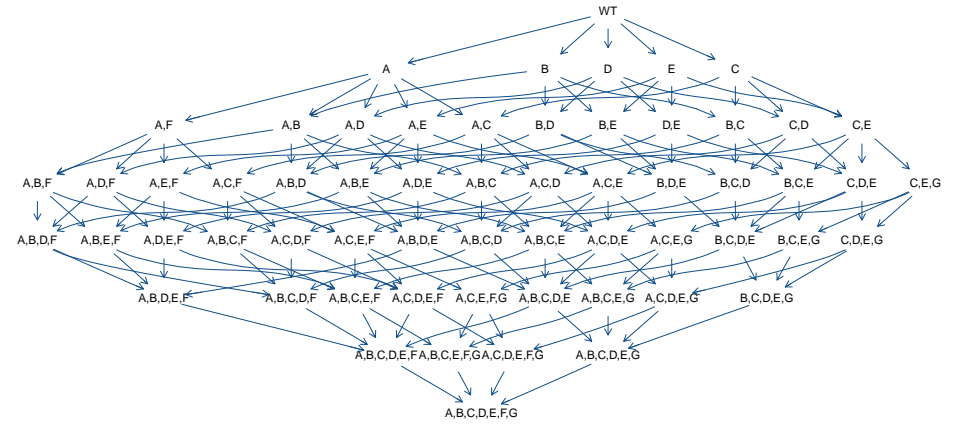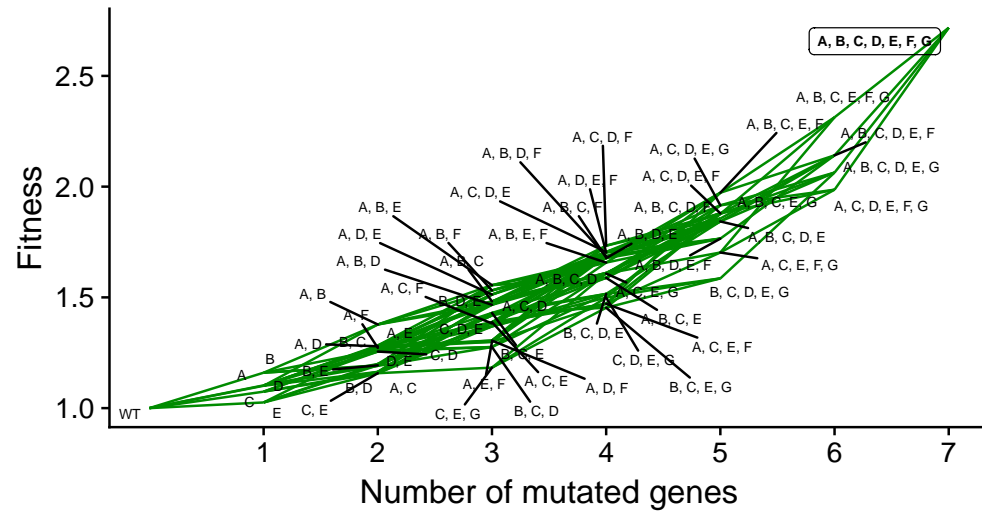

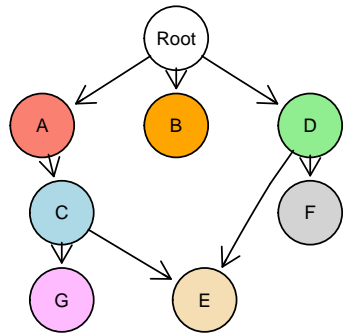

ID **J6ltoaqms6HIPc7B**  
 acc genotypes **32**  
 peaks no back 1  
 removed edges 0  
 prop rem edges 0

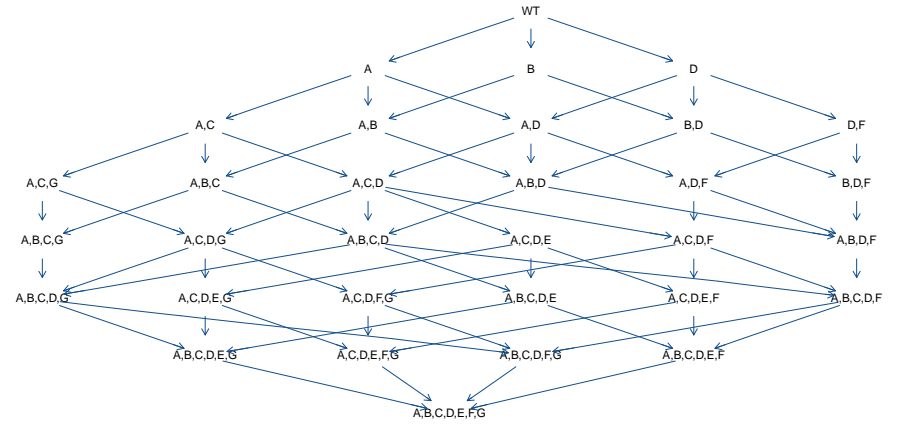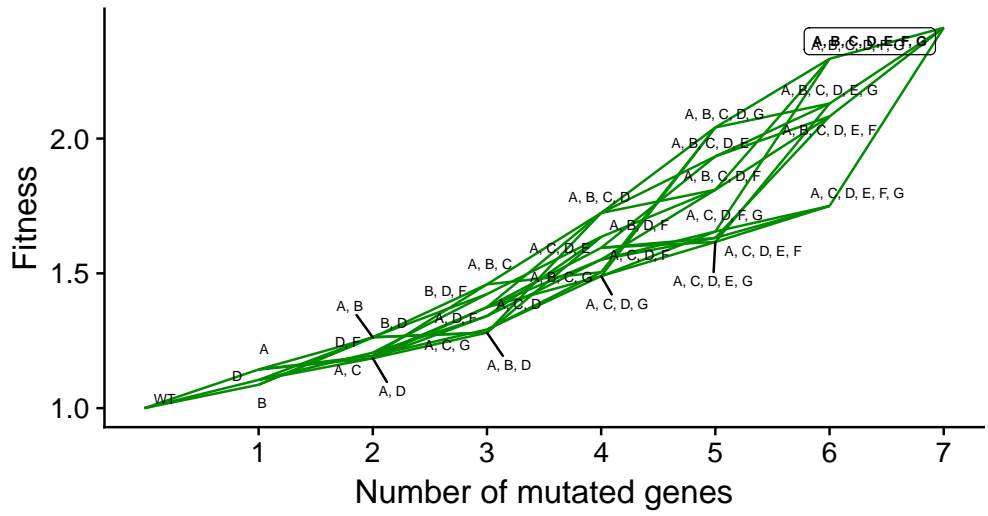



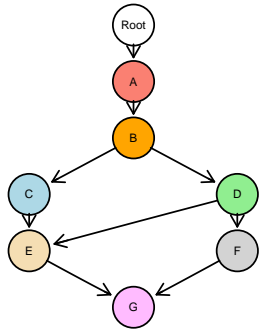

ID **j71sbZK1fQ6ihd8O**  
 acc genotypes **11**  
 peaks no back 1  
 removed edges 0  
 prop rem edges 0

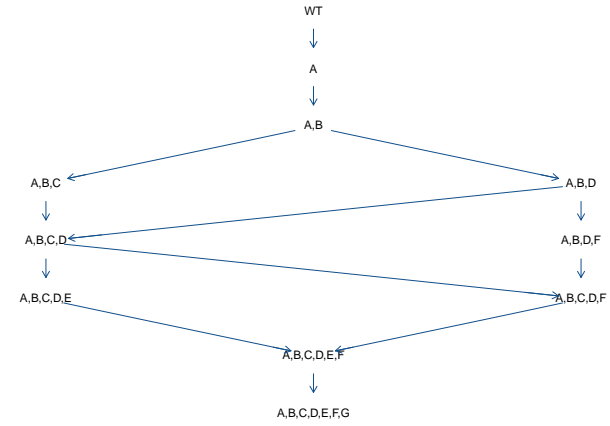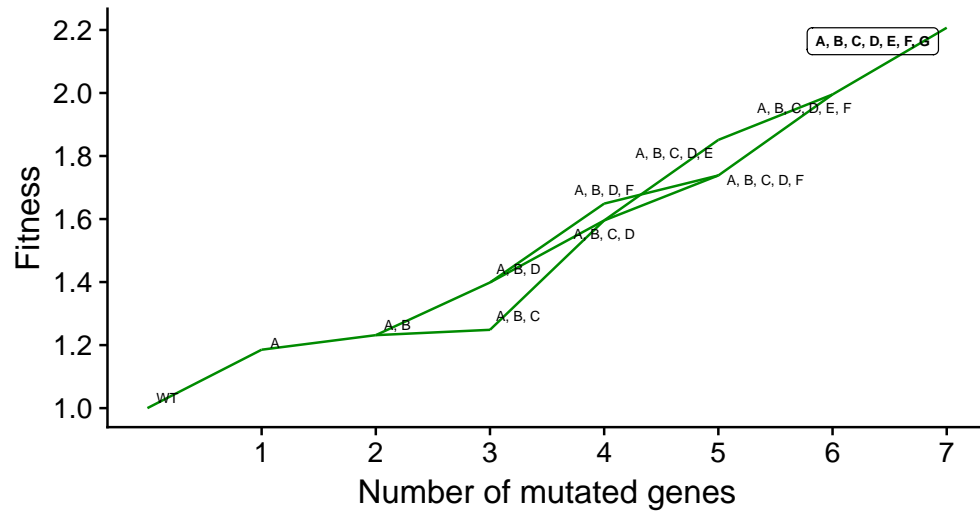



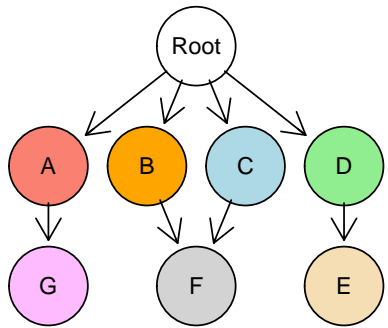

ID JoTSpt4LngDDMASj  
 acc genotypes 45  
 peaks no back 1  
 removed edges 0  
 prop rem edges 0

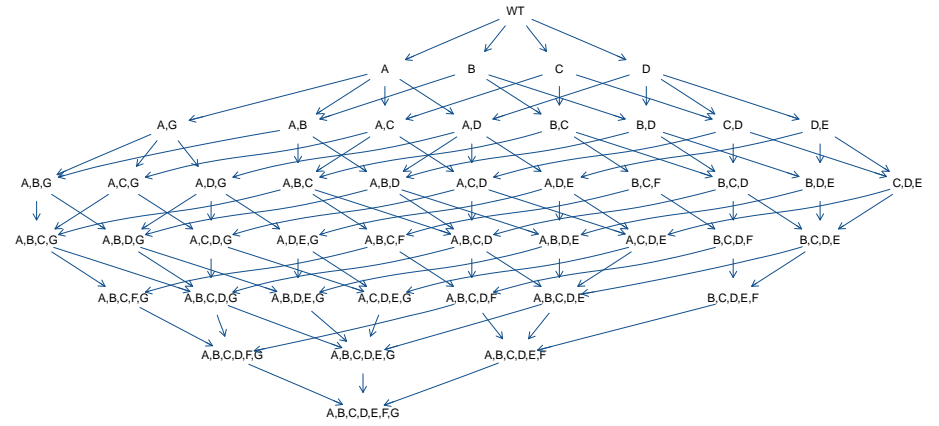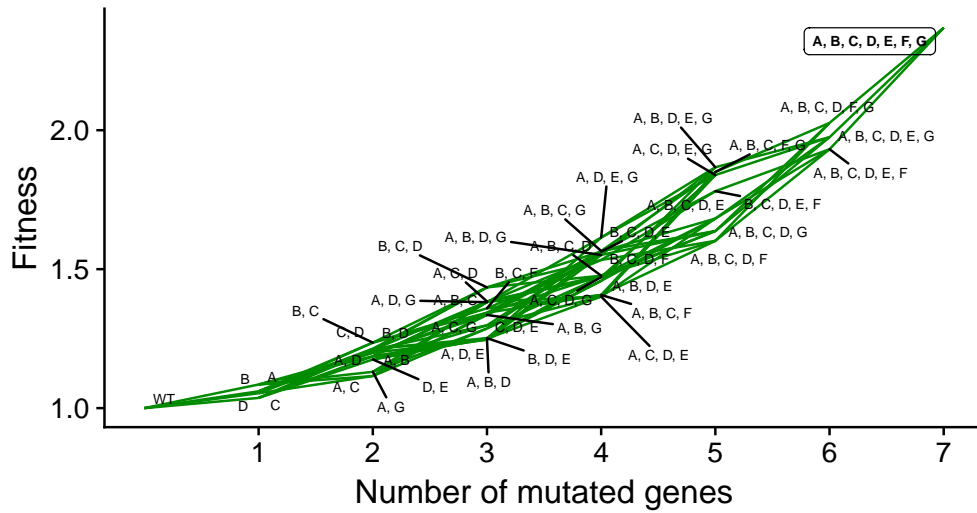

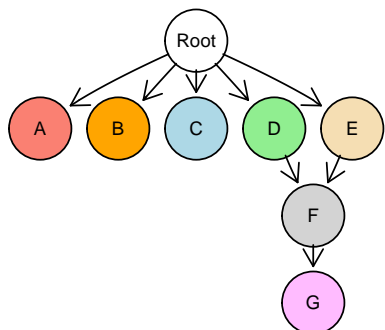

ID [jq7mqYXKFpls2uXm](#)  
 acc genotypes 48  
 peaks no back 1  
 removed edges 0  
 prop rem edges 0

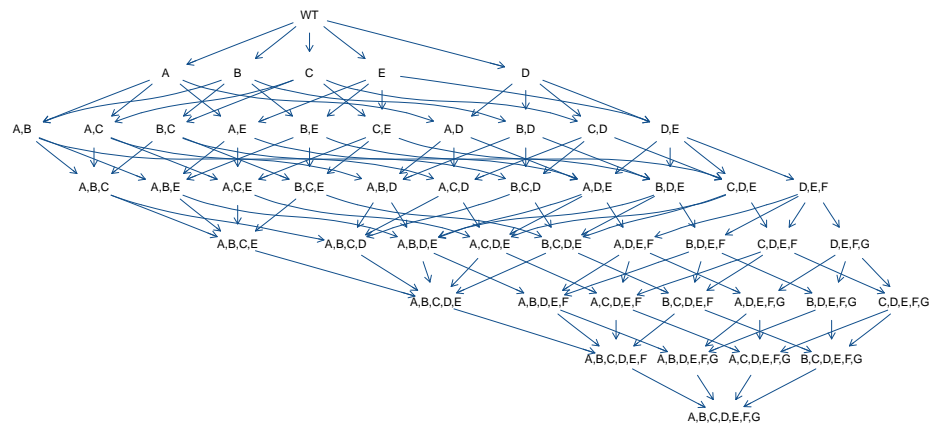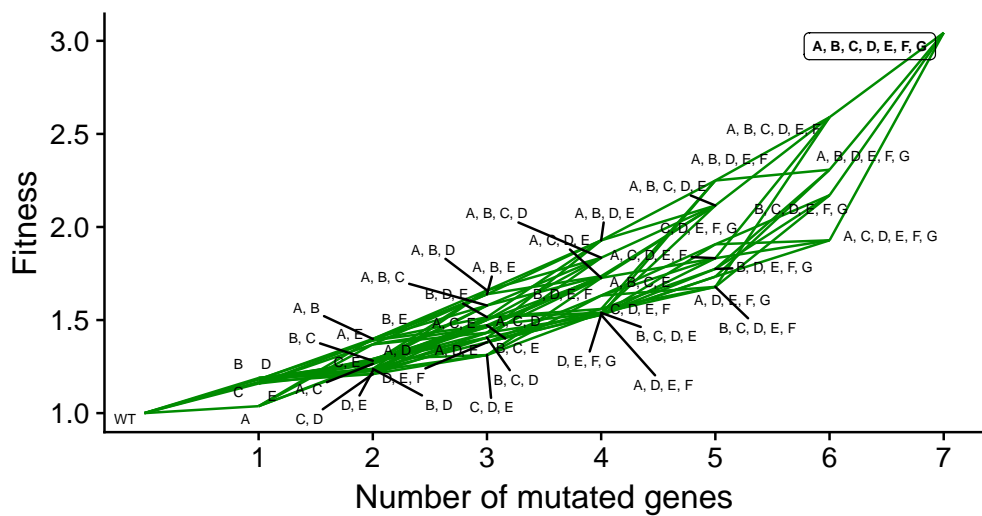

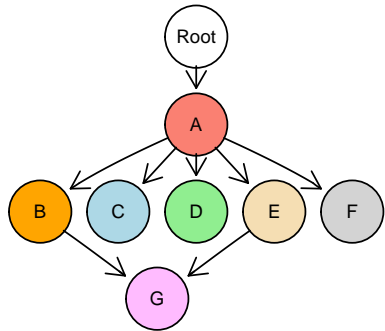

ID **JVEFSk5ORIOz9YE7**  
 acc genotypes **41**  
 peaks no back 1  
 removed edges 0  
 prop rem edges 0

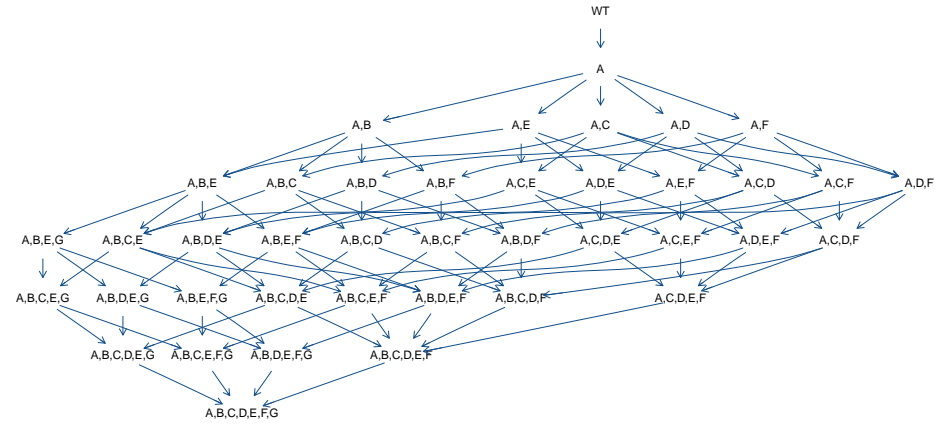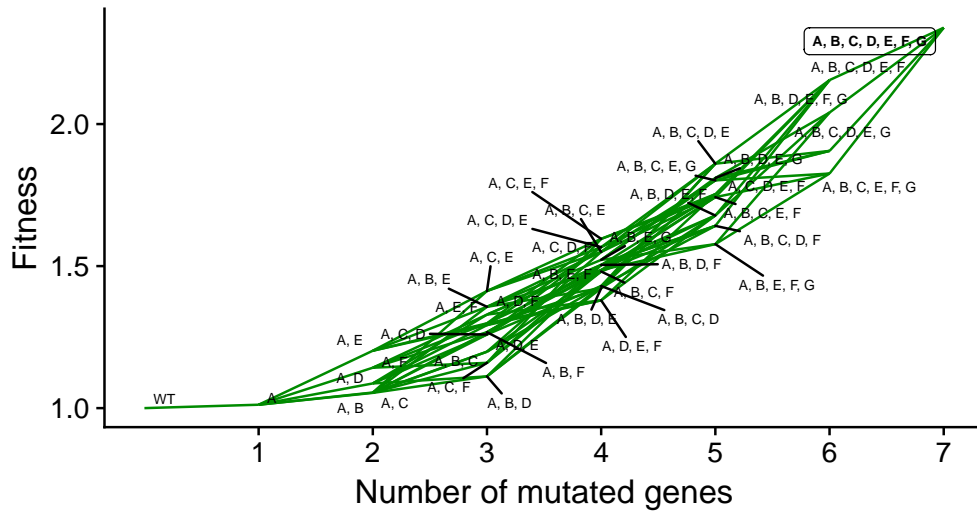

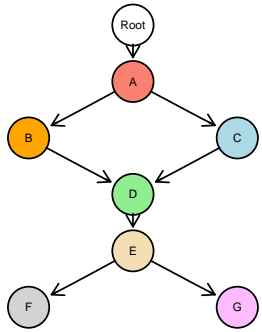

ID [K9x9g2eq1VT8flCv](#)  
 acc genotypes 10  
 peaks no back 1  
 removed edges 0  
 prop rem edges 0

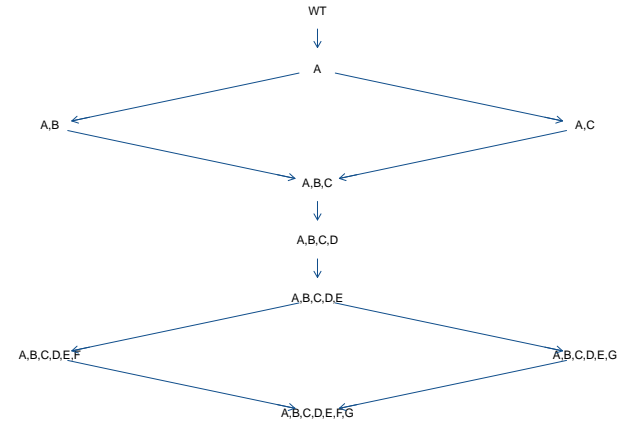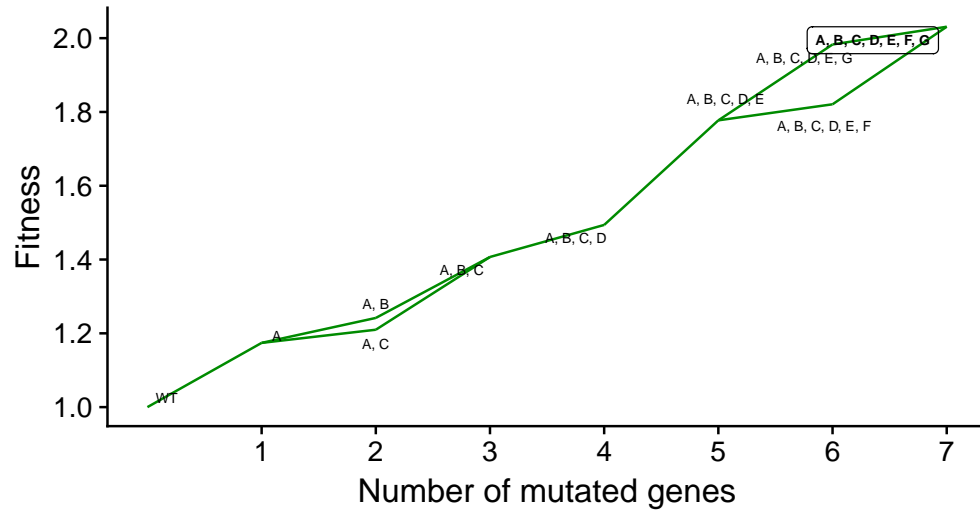

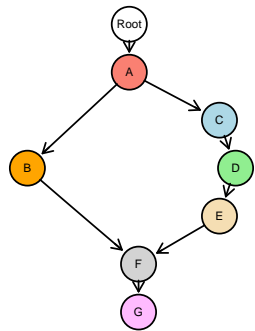

ID **kBK5zr8juD8Etoo**  
 acc genotypes **11**  
 peaks no back 1  
 removed edges 0  
 prop rem edges 0

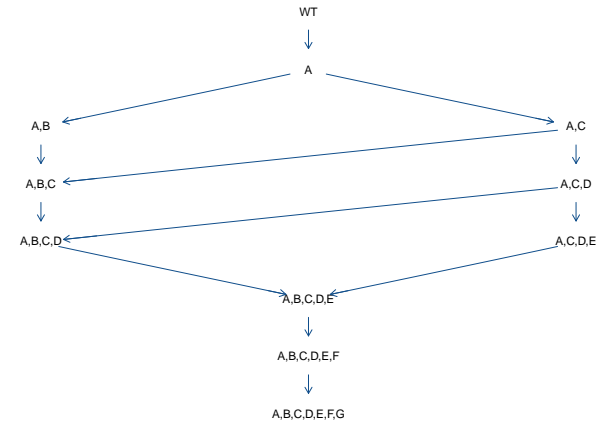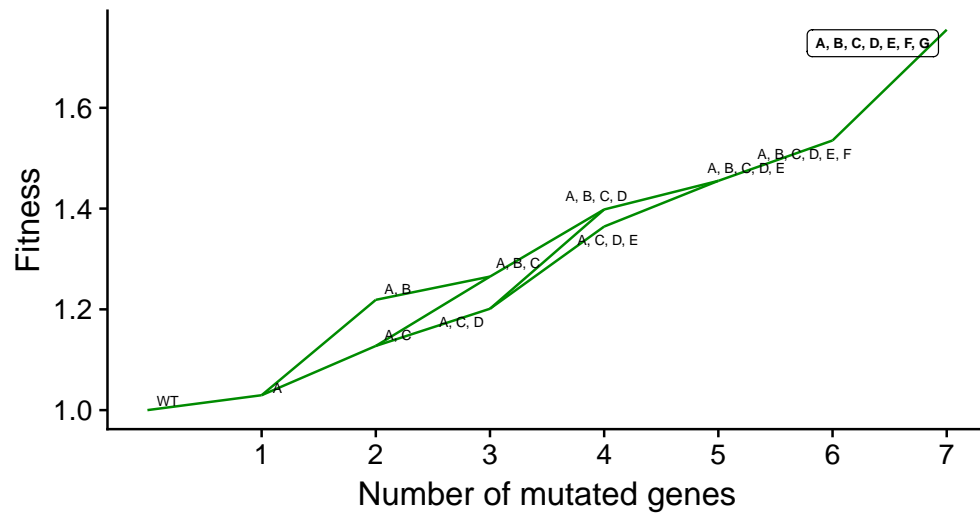

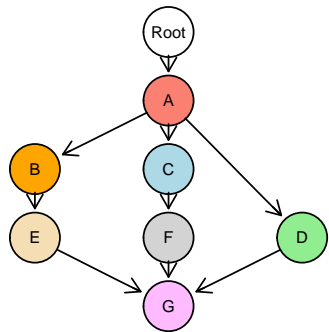

ID **KctNTtEFQr1oMvyT**  
 acc genotypes **20**  
 peaks no back 1  
 removed edges 0  
 prop rem edges 0

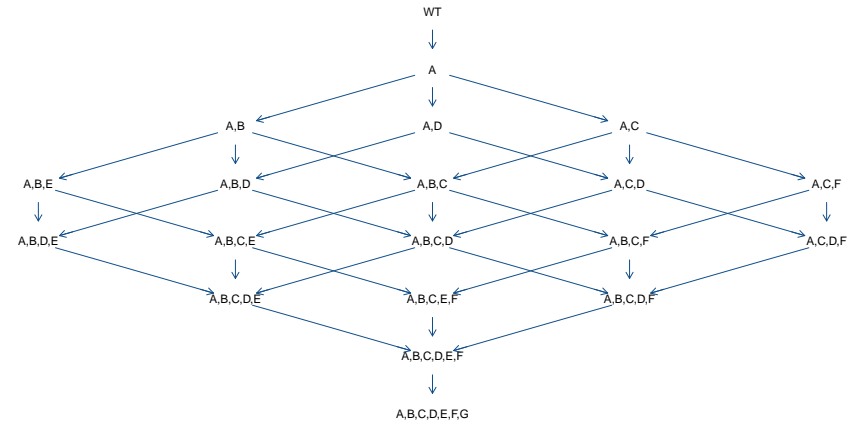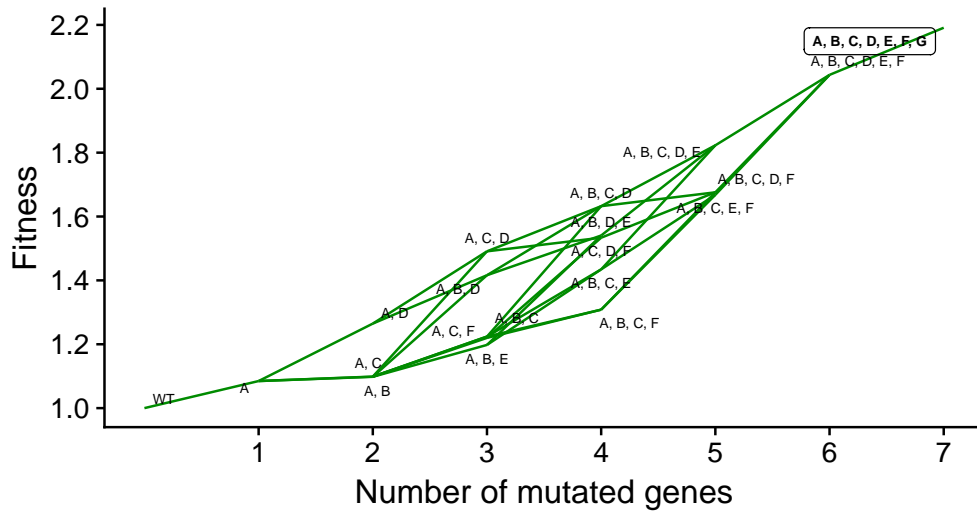



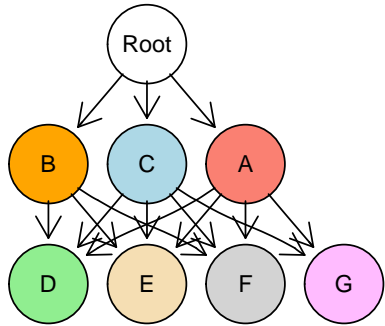

ID [kf9mgLp5ZKwjcVhz](#)  
 acc genotypes 24  
 peaks no back 1  
 removed edges 0  
 prop rem edges 0

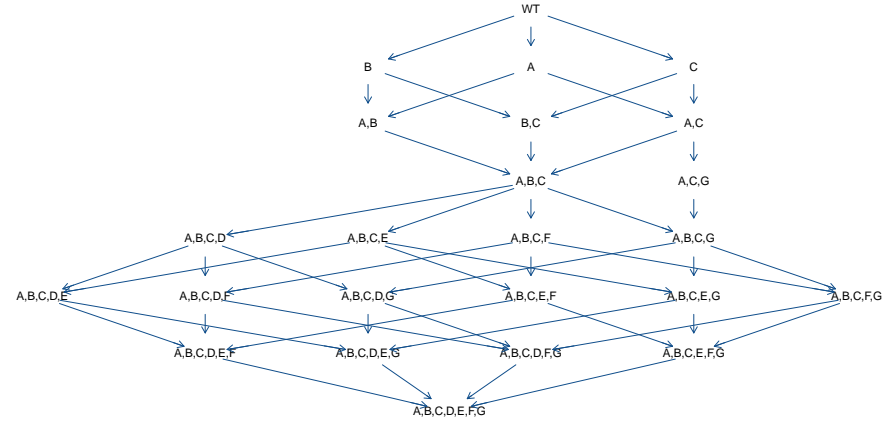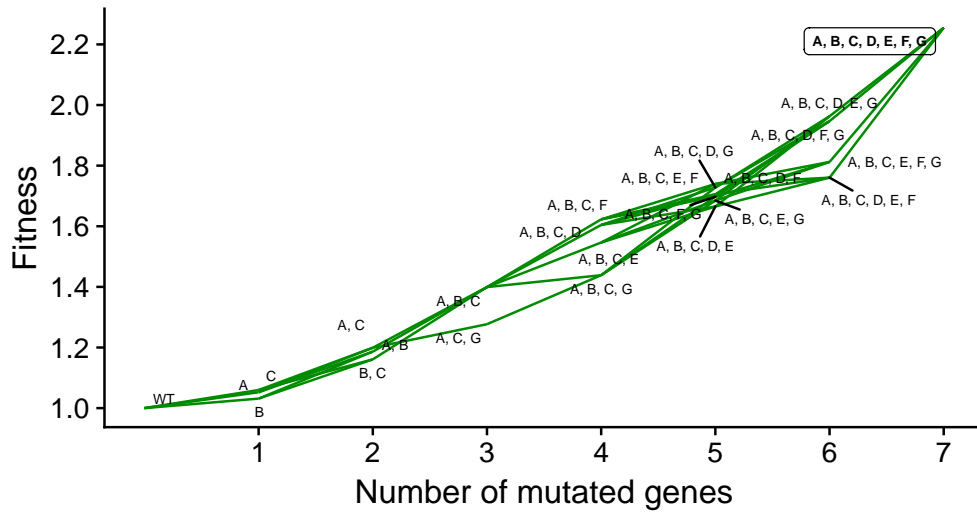

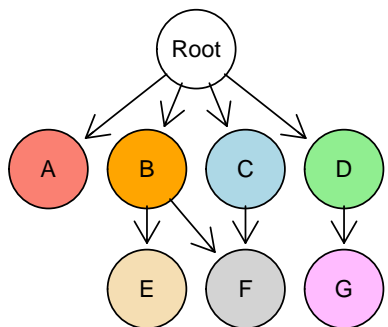

ID KtmVflOzxH44NUrR  
 acc genotypes 48  
 peaks no back 1  
 removed edges 0  
 prop rem edges 0

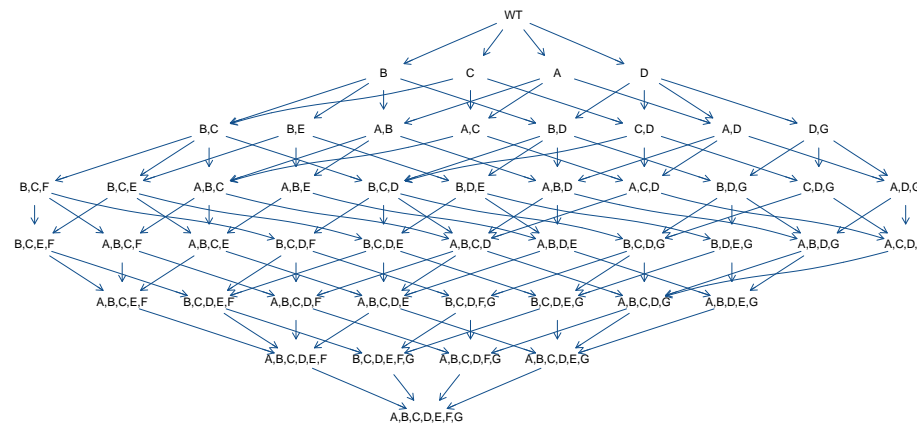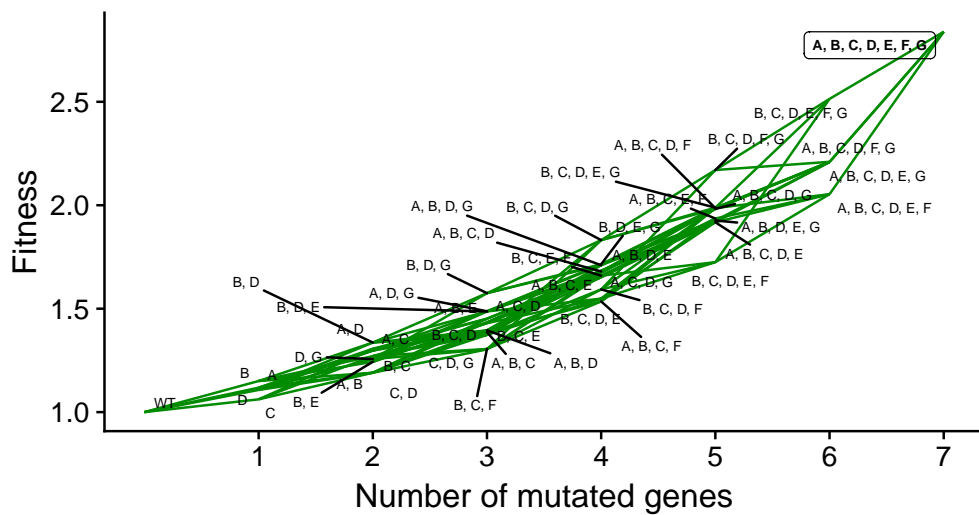

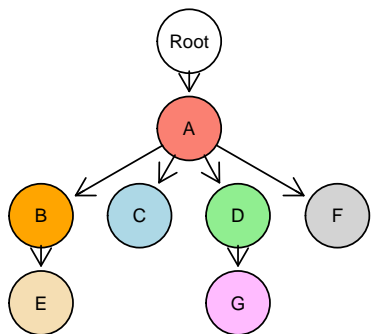

ID **KZkcV1r2fzi9JPSr**  
 acc genotypes **37**  
 peaks no back 1  
 removed edges 0  
 prop rem edges 0

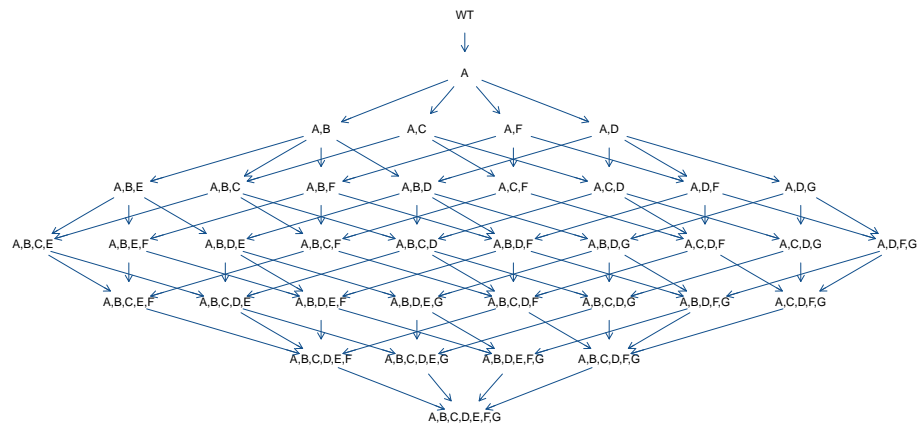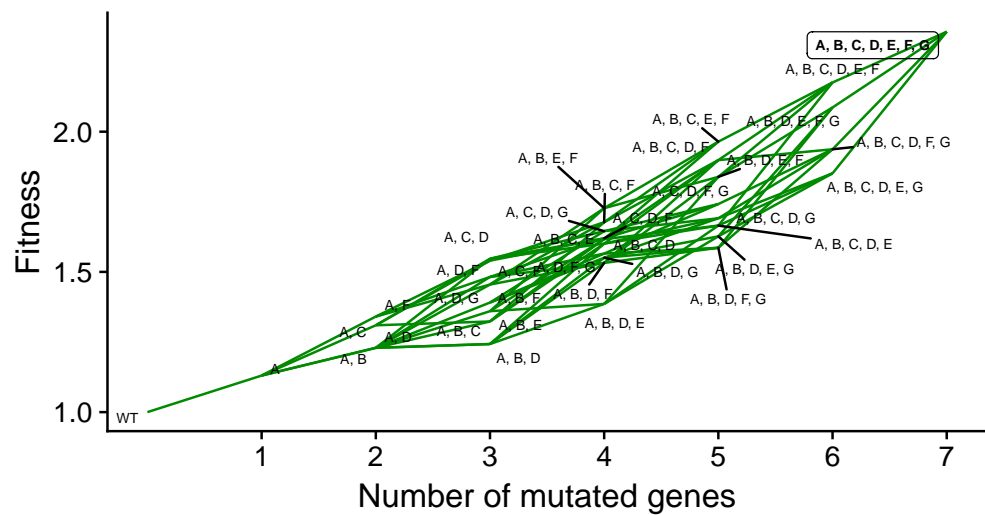

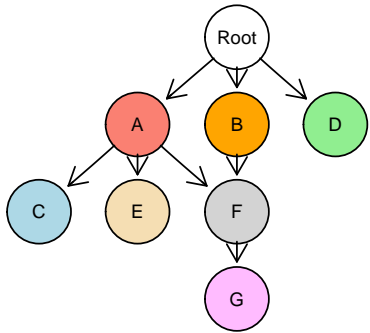

ID **Lke10loDf84oef4BC**  
 acc genotypes **36**  
 peaks no back 1  
 removed edges 0  
 prop rem edges 0

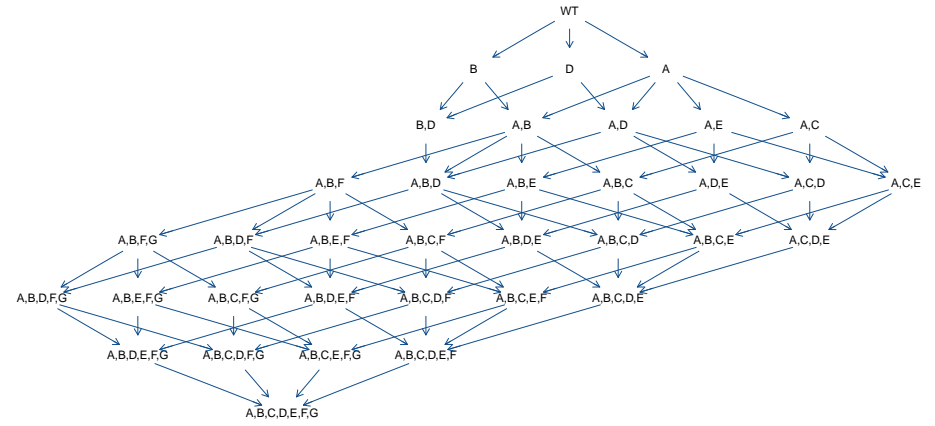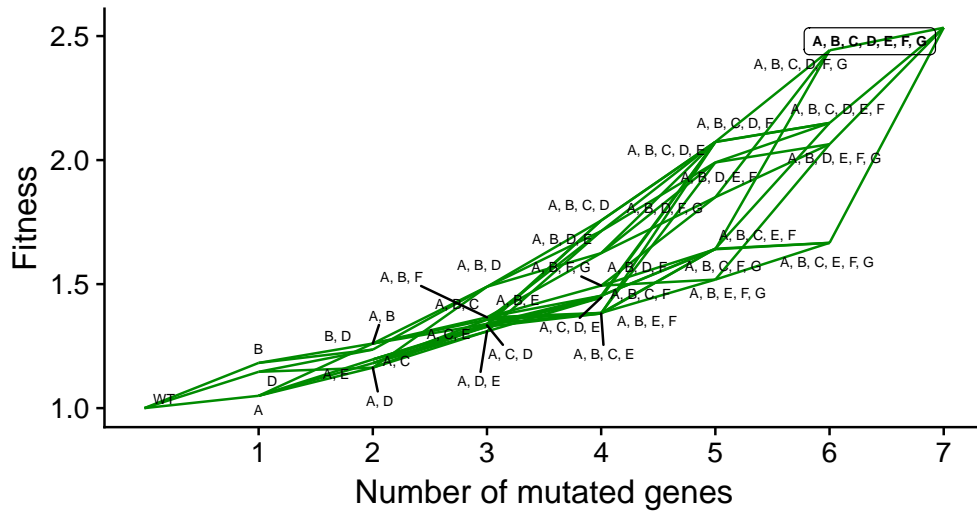

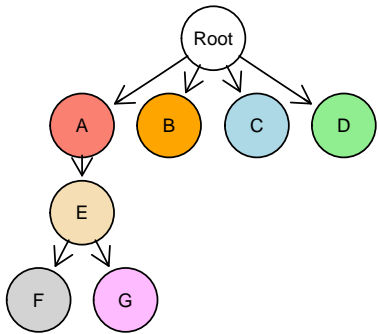

ID **LIVHZ106EHMqYUsuF**  
 acc genotypes **48**  
 peaks no back **1**  
 removed edges **0**  
 prop rem edges **0**

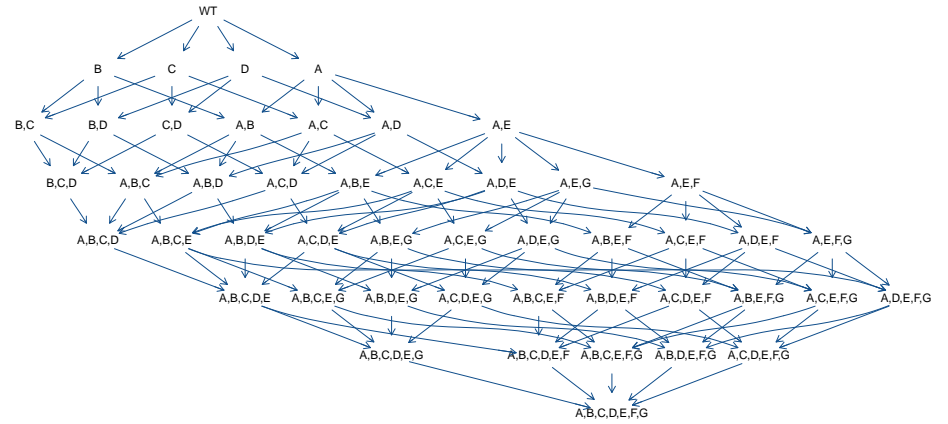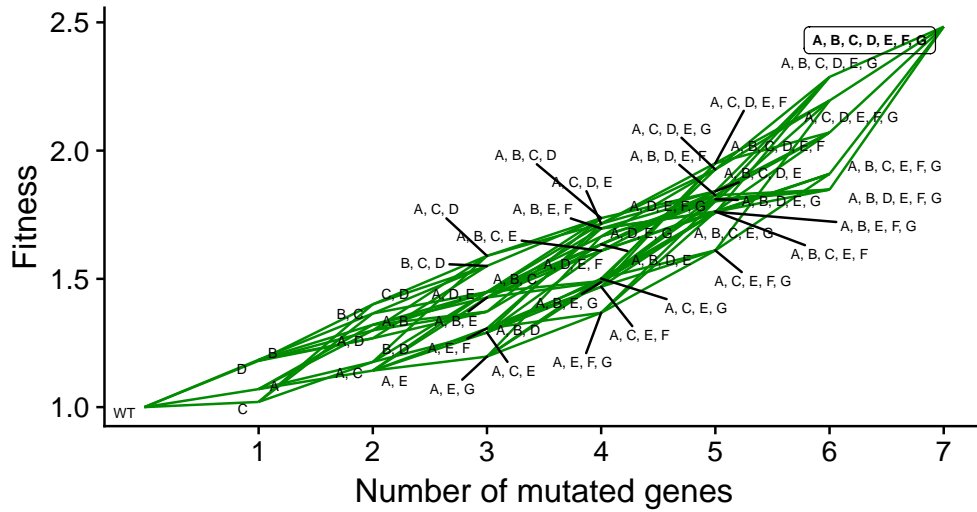

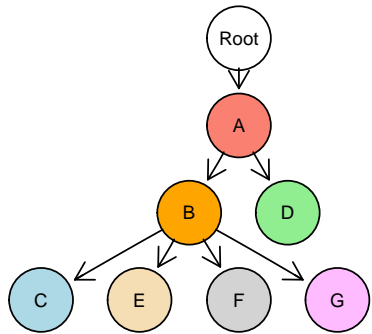

ID LpANxOHMhj1cYLtN  
 acc genotypes 35  
 peaks no back 1  
 removed edges 0  
 prop rem edges 0

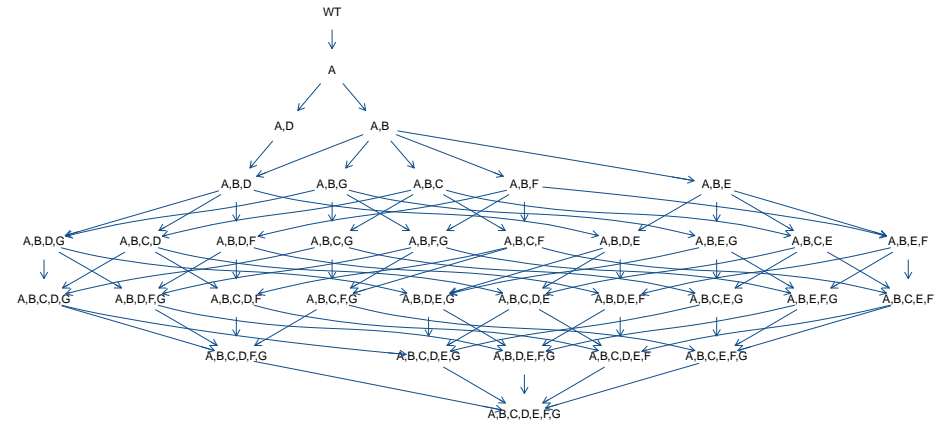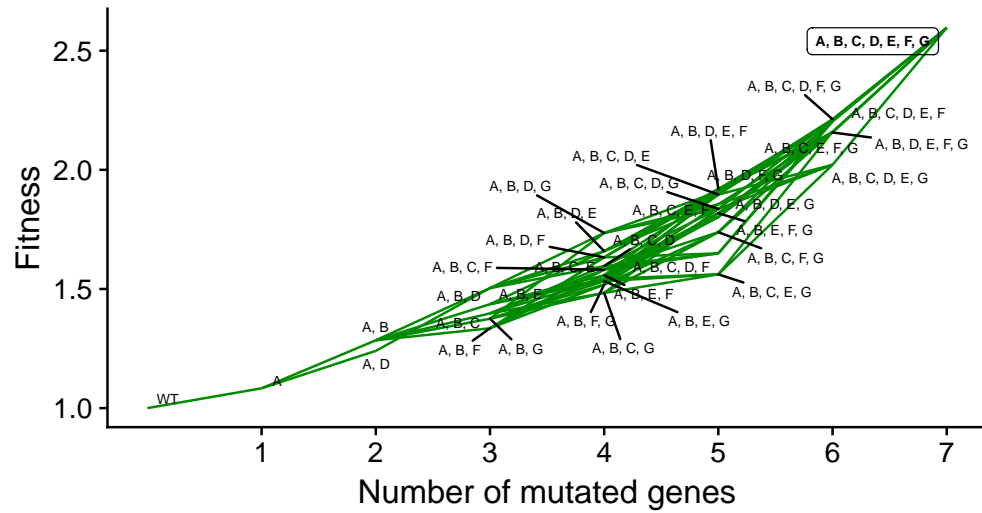

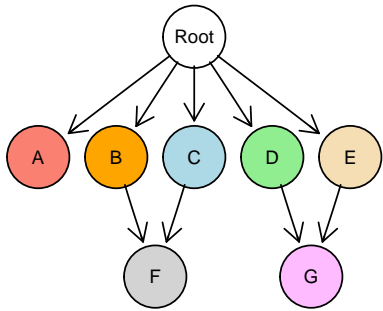

ID **LTgRqknZ6BY1cfLB**  
 acc genotypes **50**  
 peaks no back 1  
 removed edges 0  
 prop rem edges 0

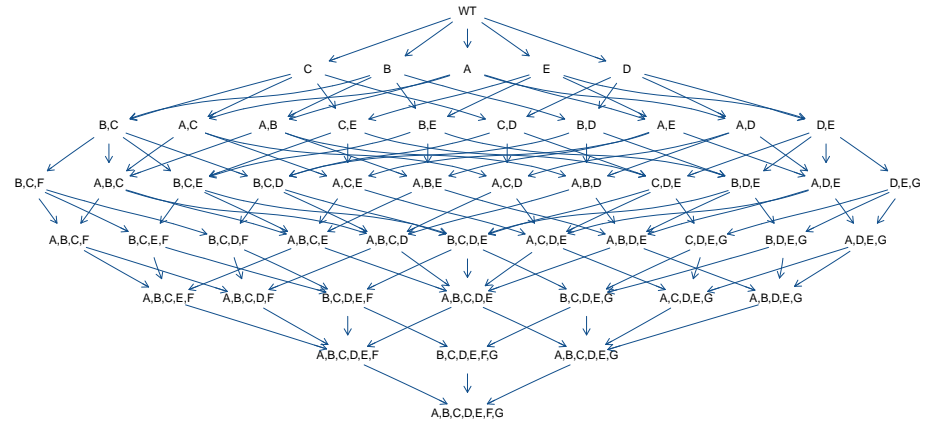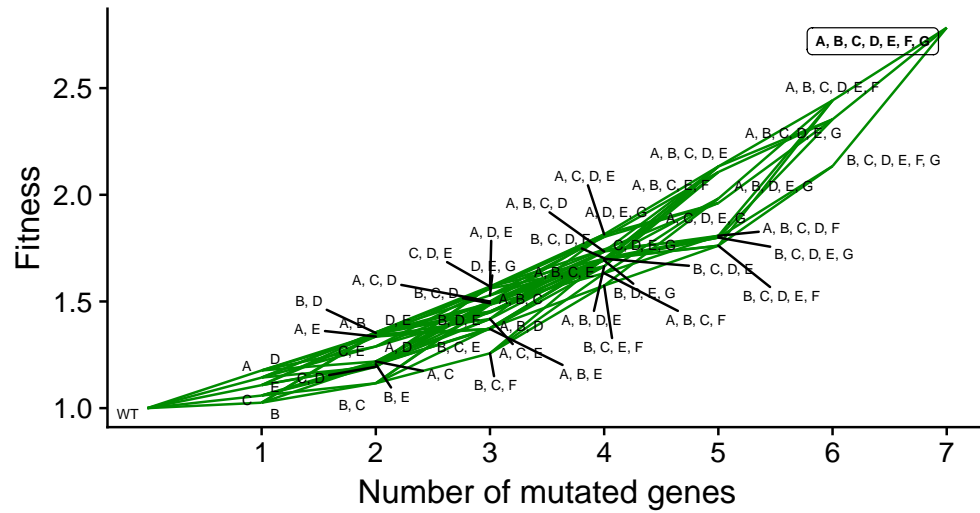

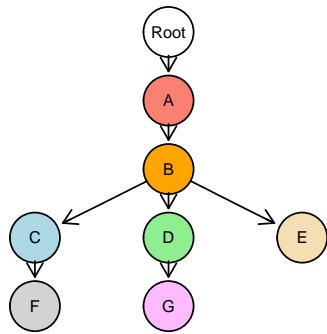

ID Mdi5kYcCCepKSprh  
 acc genotypes 20  
 peaks no back 1  
 removed edges 0  
 prop rem edges 0

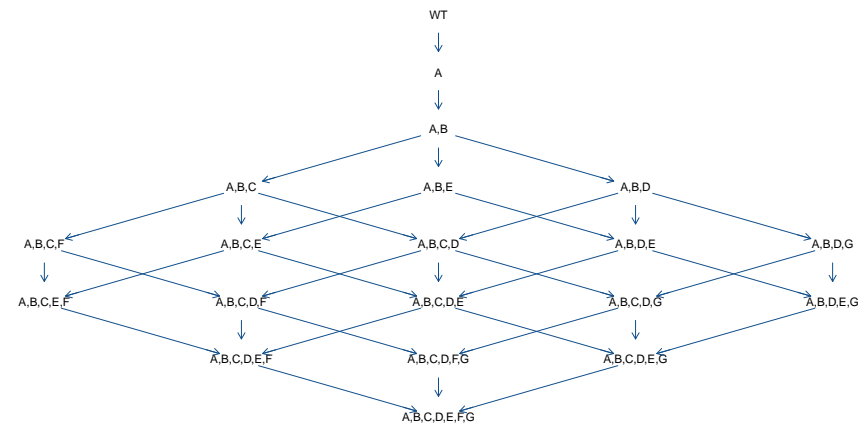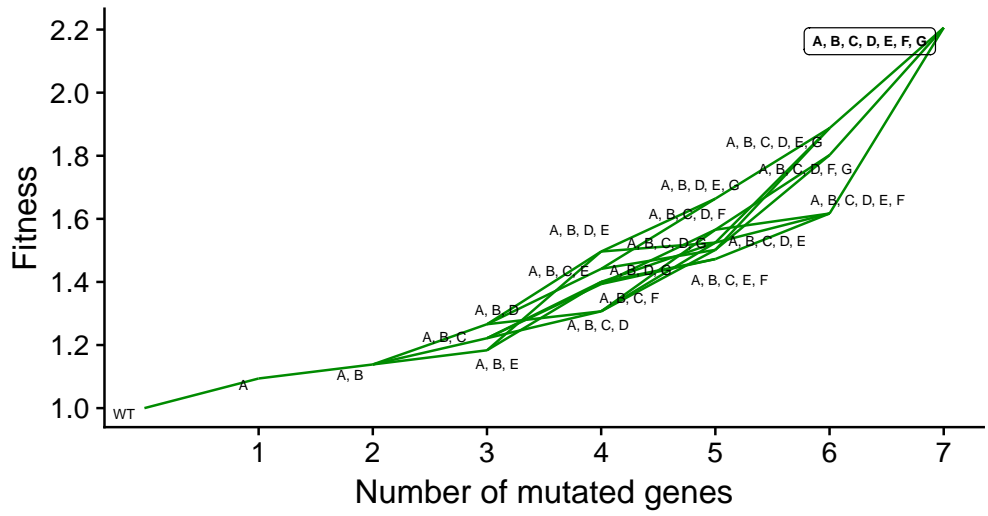



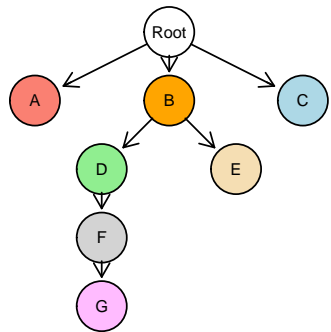

ID **mEX5RjVtCmtkvl6C**  
 acc genotypes **36**  
 peaks no back **1**  
 removed edges **0**  
 prop rem edges **0**

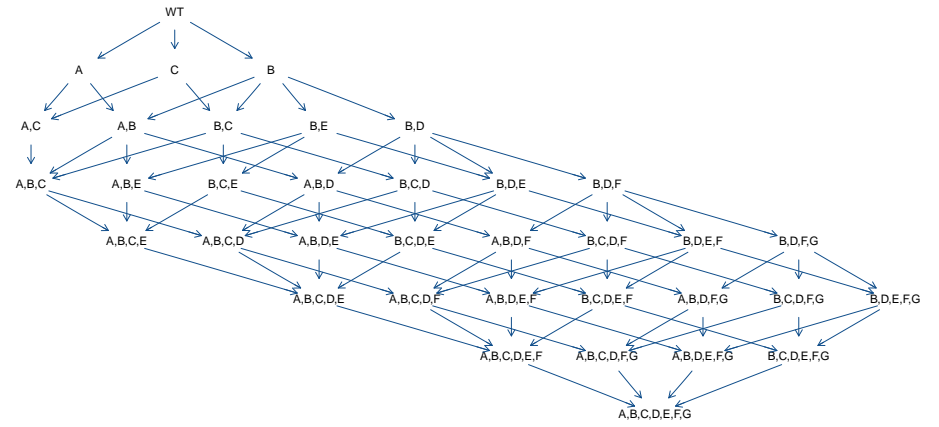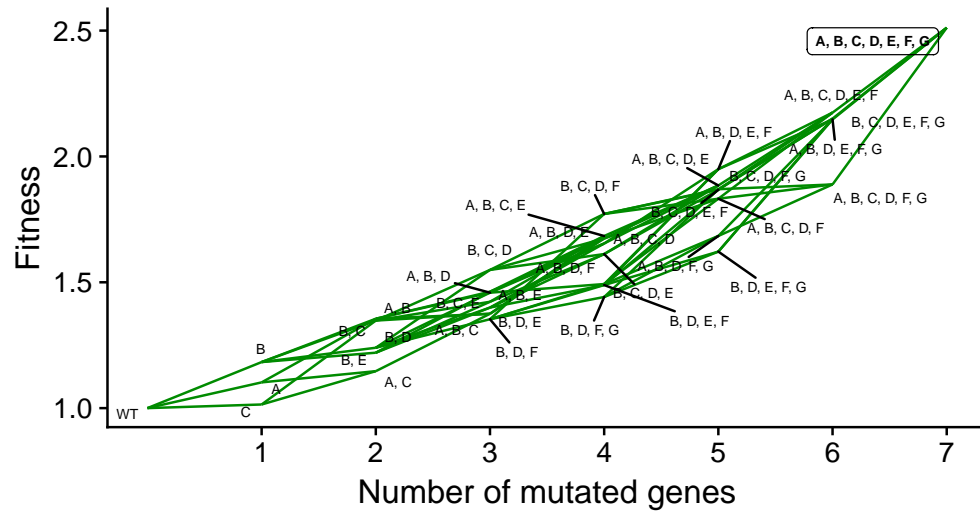

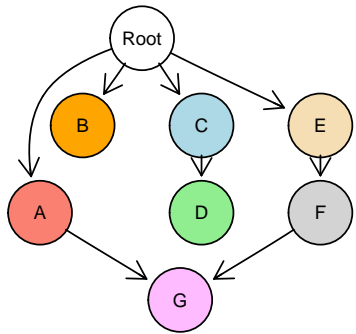

ID **MHHdzPsMBi26wD8j**  
 acc genotypes **42**  
 peaks no back 1  
 removed edges 0  
 prop rem edges 0

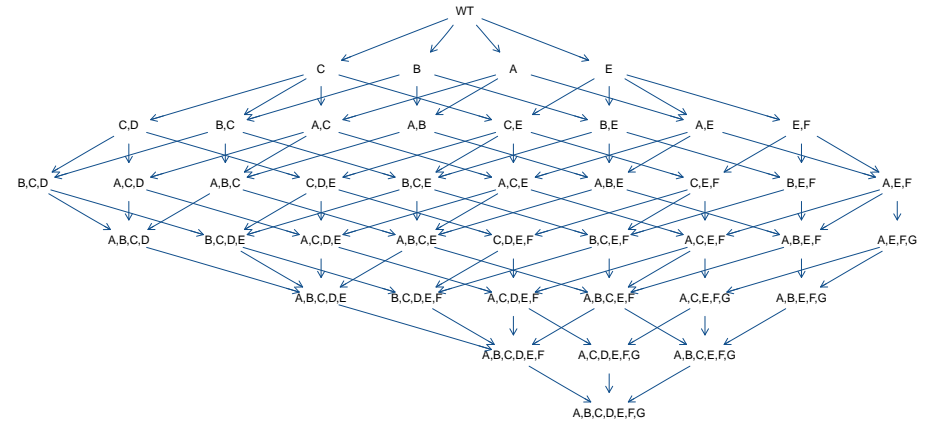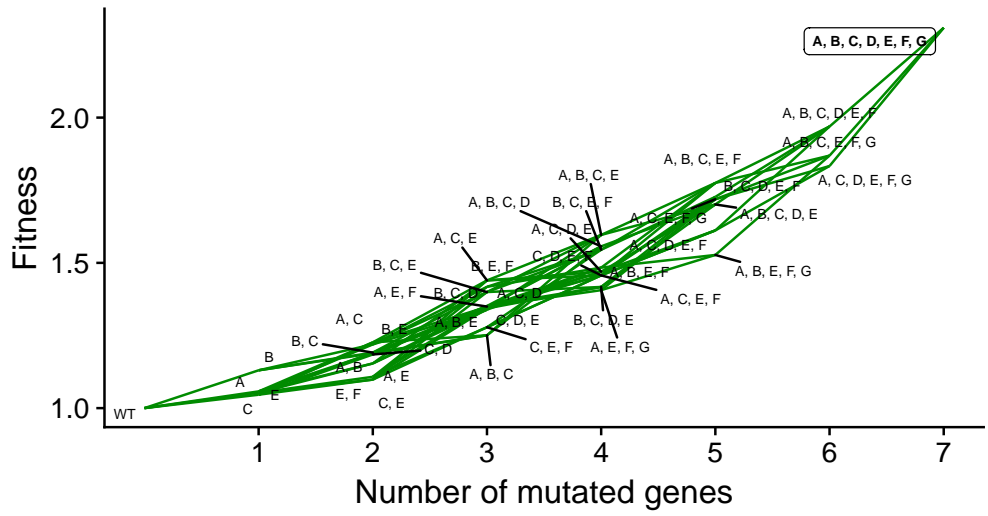

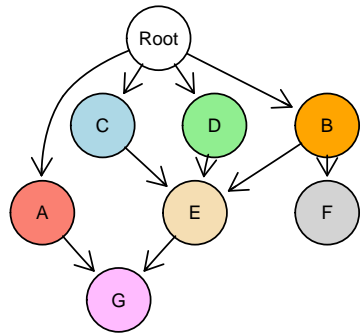

ID **MiiXBqQH10YjcXVMI**  
 acc genotypes **30**  
 peaks no back 1  
 removed edges 0  
 prop rem edges 0

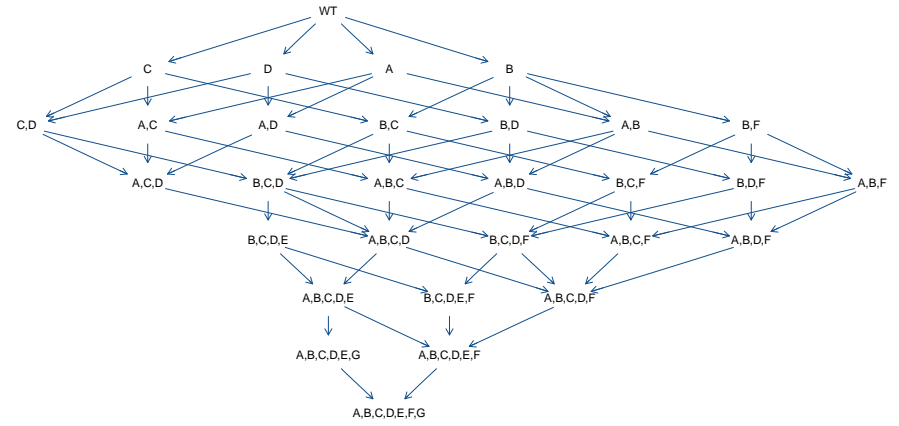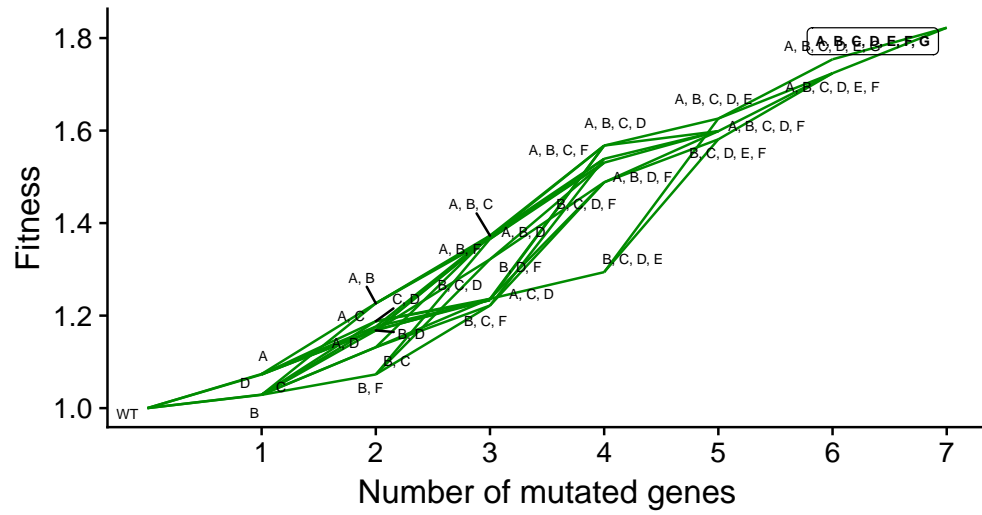

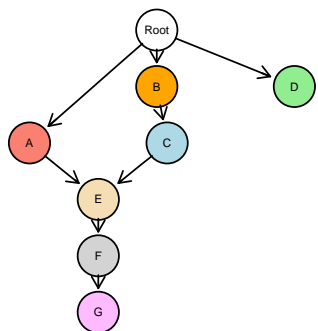

ID MJEstF1cdVazElfA  
 acc genotypes 18  
 peaks no back 1  
 removed edges 0  
 prop rem edges 0

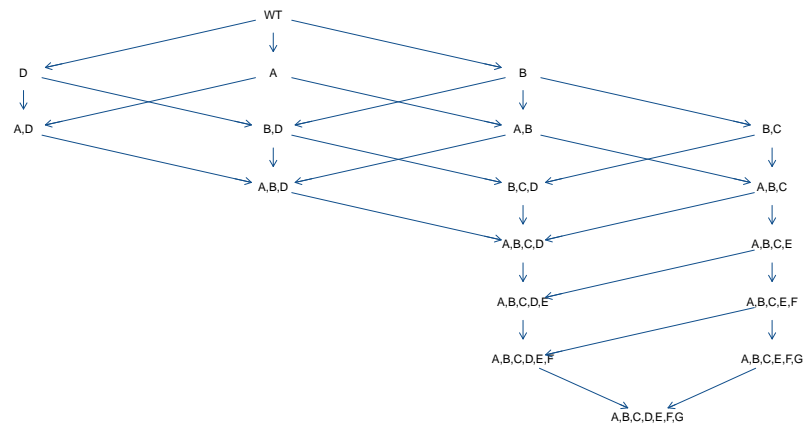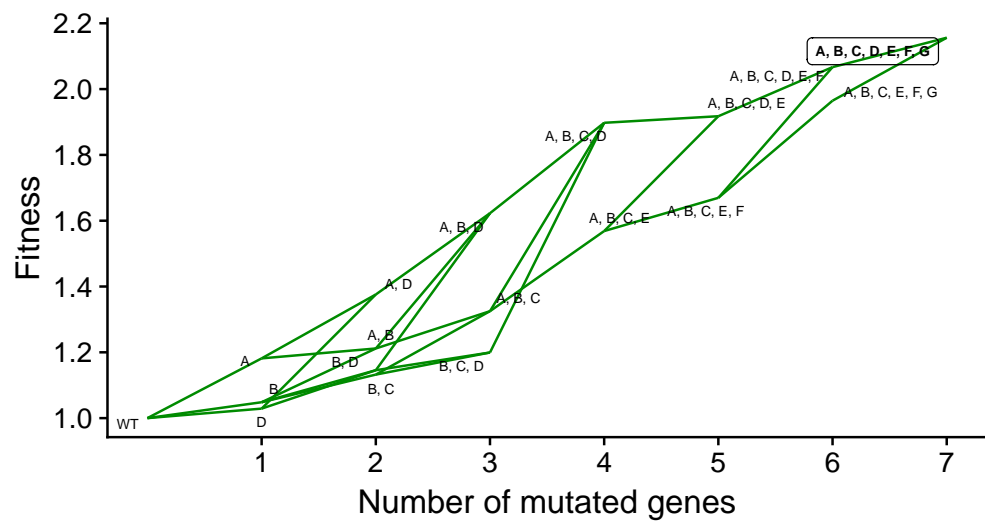

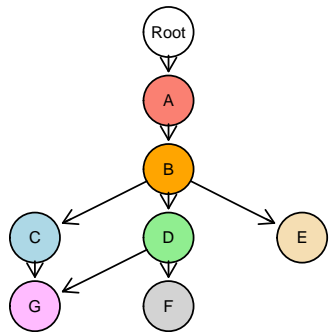

ID MJMydL6WRmXU5Lio  
 acc genotypes 18  
 peaks no back 1  
 removed edges 0  
 prop rem edges 0

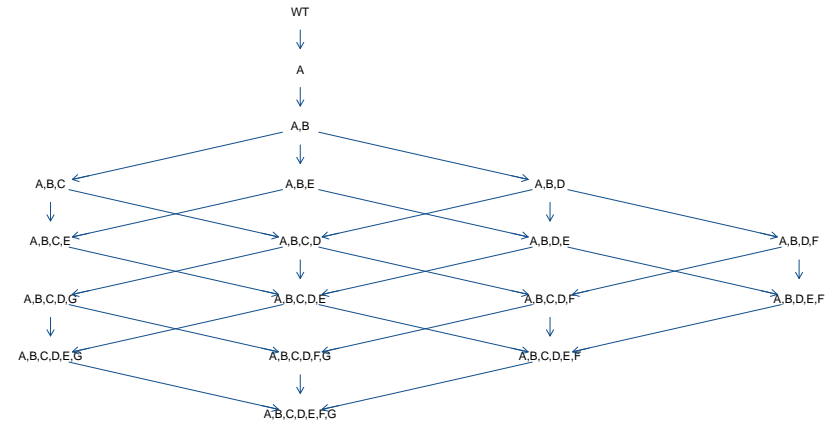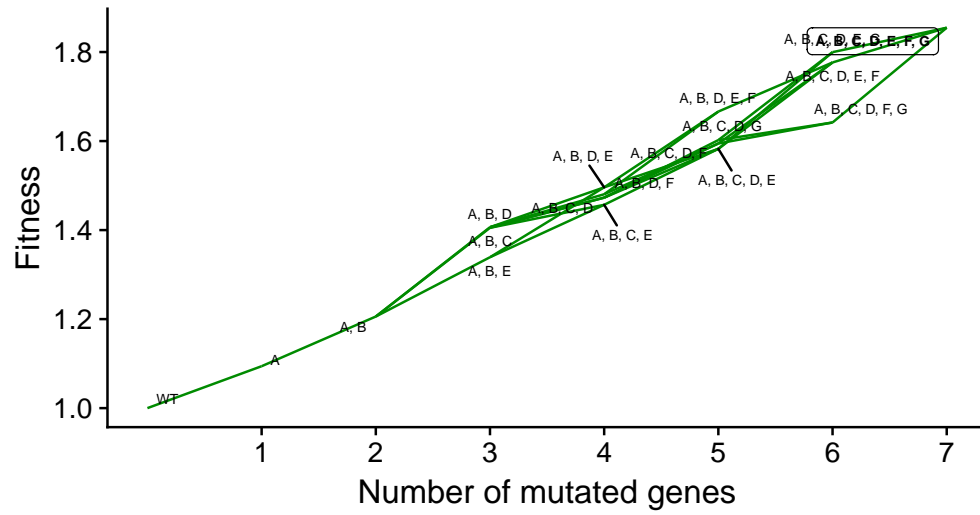



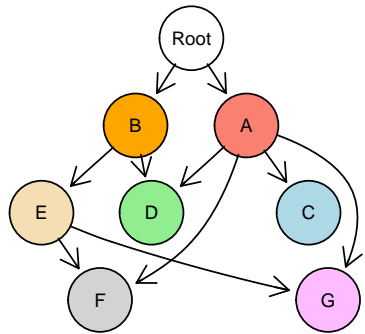

ID MmQTibreqvylDuMK  
 acc genotypes 25  
 peaks no back 1  
 removed edges 0  
 prop rem edges 0

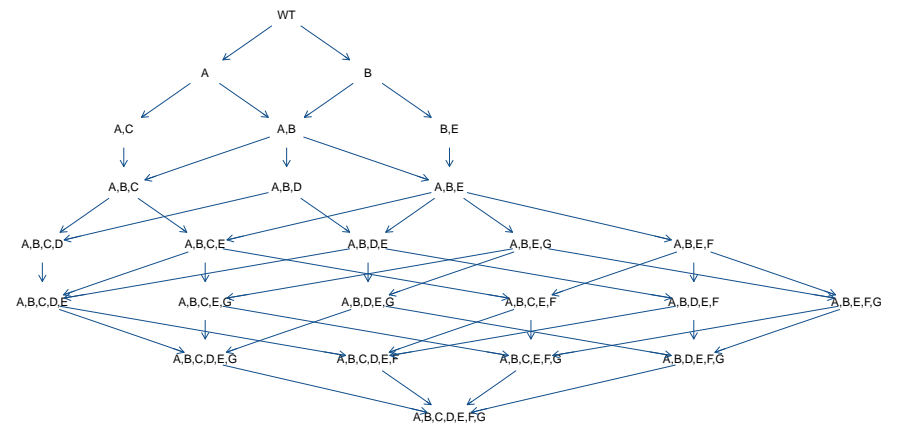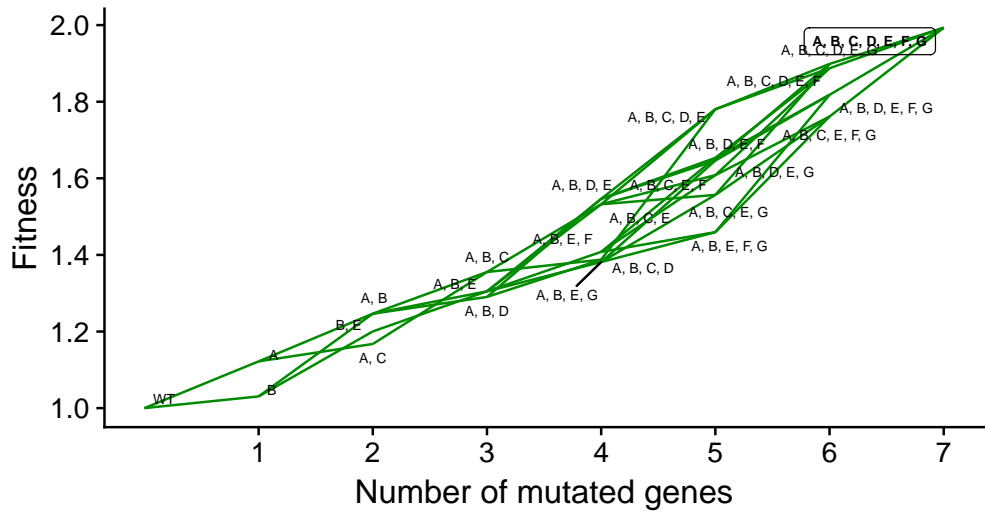

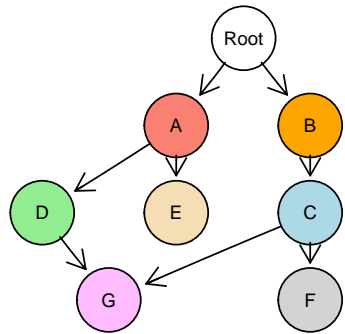

ID **msMlq14eo3nmvydj**  
 acc genotypes **24**  
 peaks no back 1  
 removed edges 0  
 prop rem edges 0

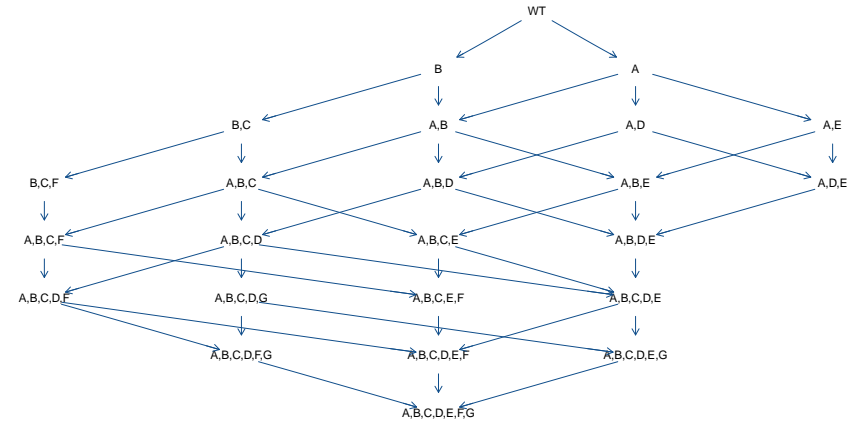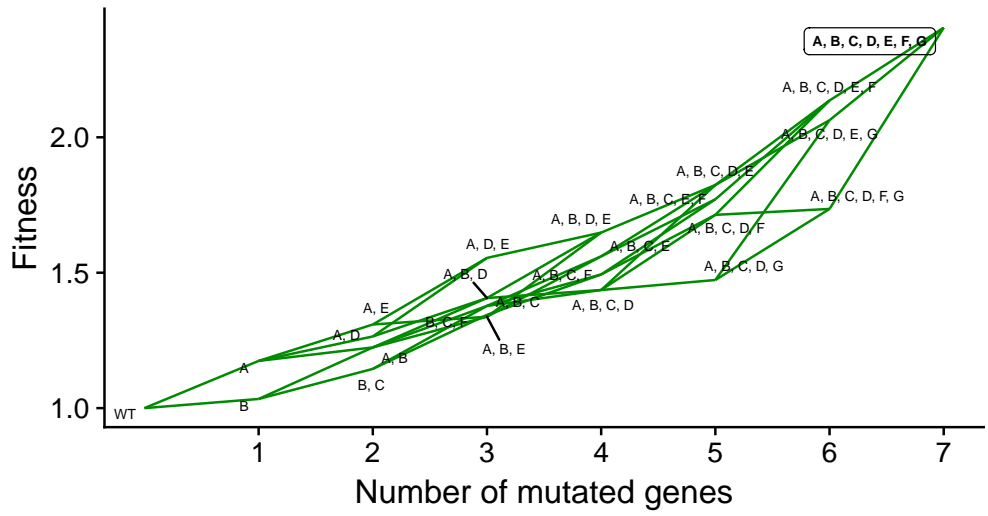



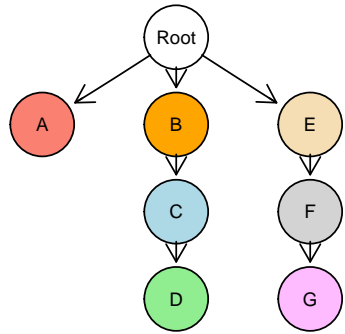

ID **mzgsSEJyu3Unz2A**  
 acc genotypes **32**  
 peaks no back 1  
 removed edges 0  
 prop rem edges 0

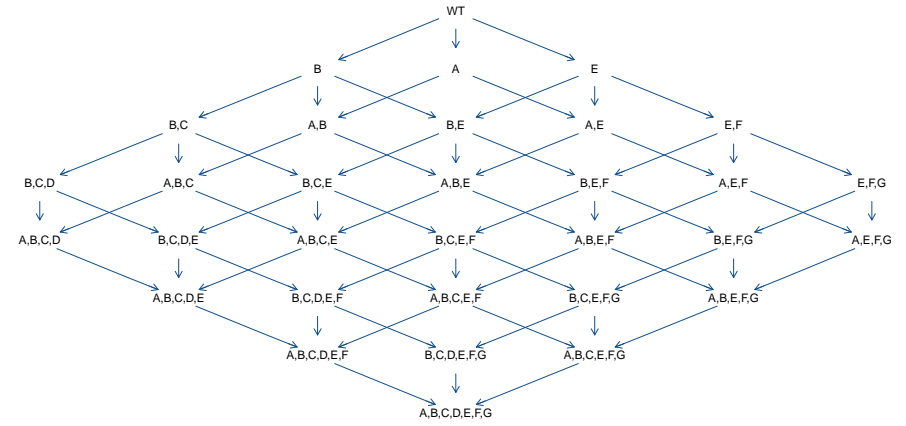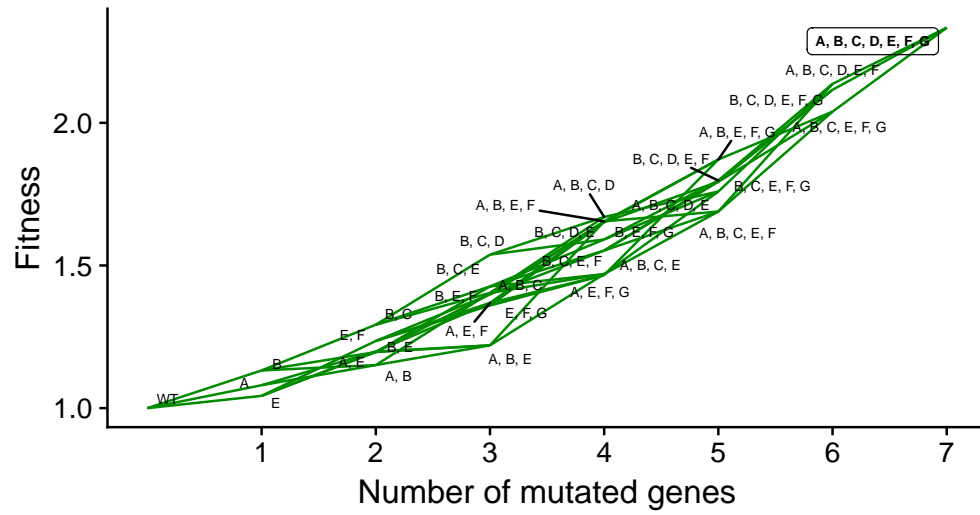

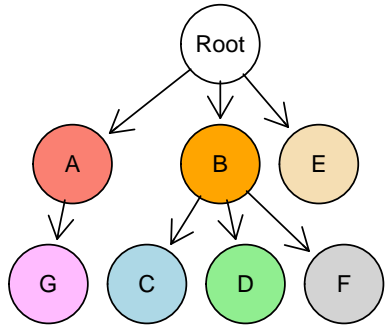

ID N4iitsjj5WGvCNiO  
 acc genotypes 54  
 peaks no back 1  
 removed edges 0  
 prop rem edges 0

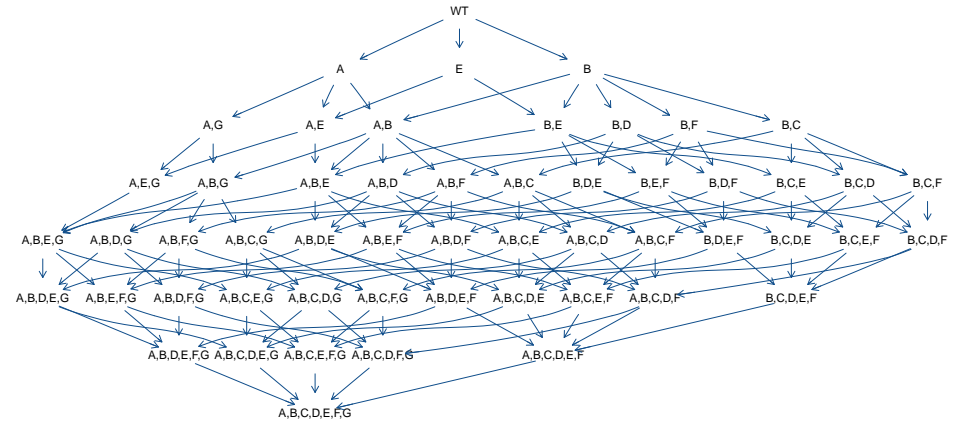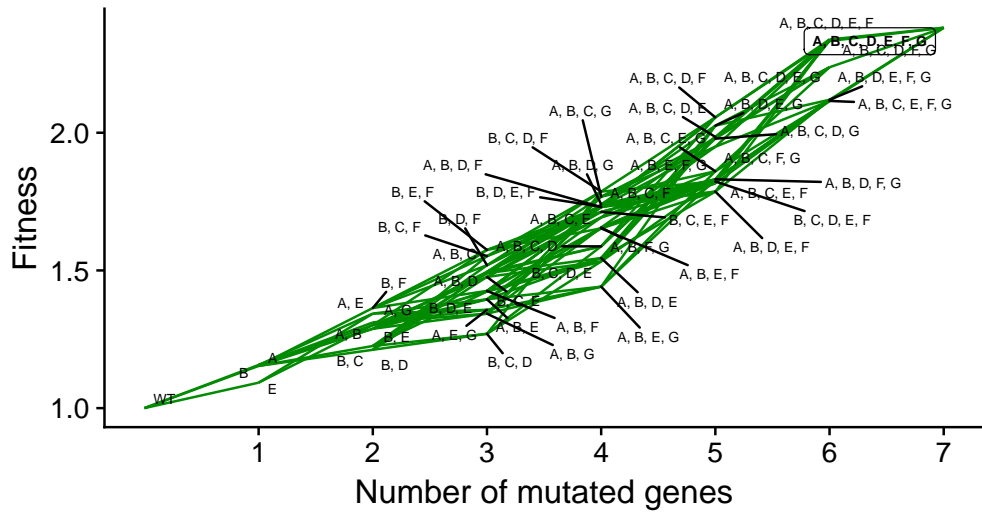

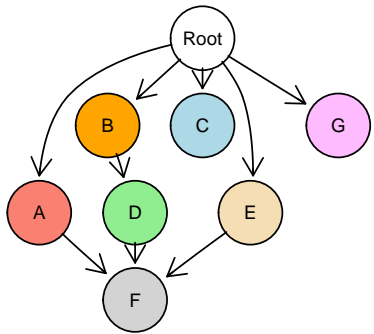

ID **N9wjEenhGOIChUML**  
 acc genotypes **52**  
 peaks no back 1  
 removed edges 0  
 prop rem edges 0

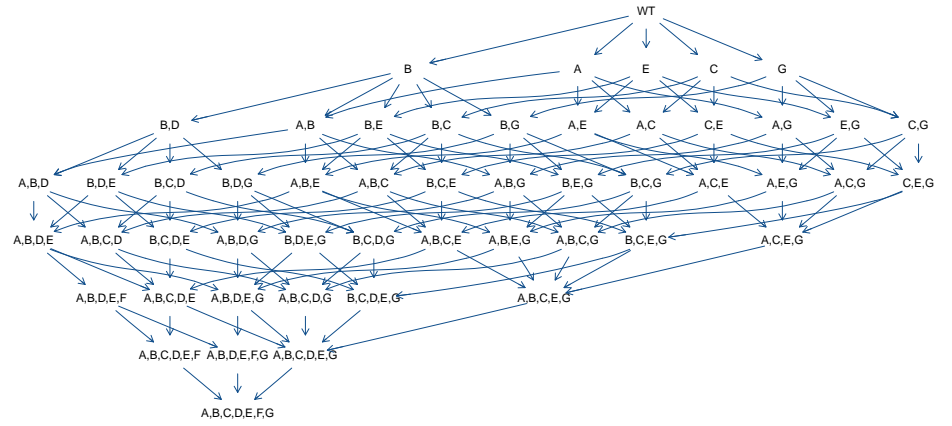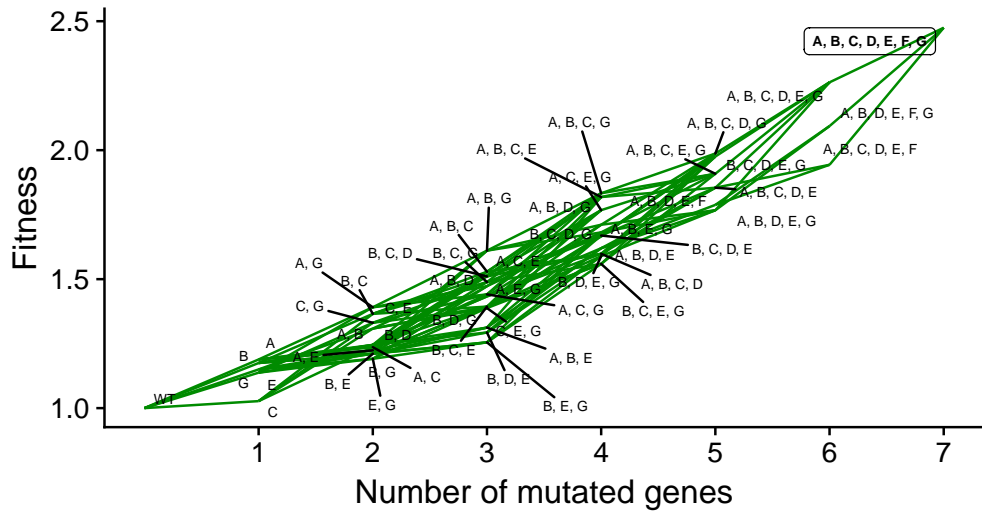

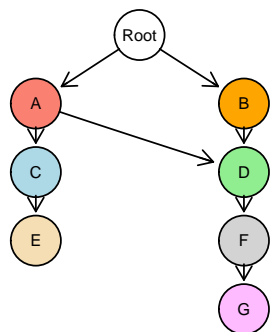

ID [nbY47YBy9tCkfebb](#)  
 acc genotypes 17  
 peaks no back 1  
 removed edges 0  
 prop rem edges 0

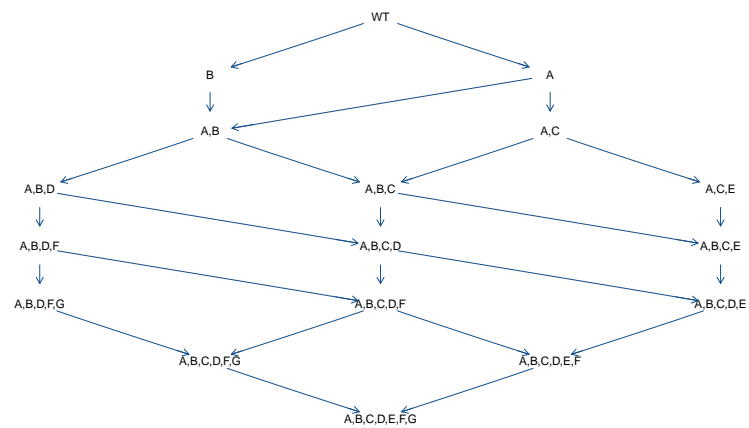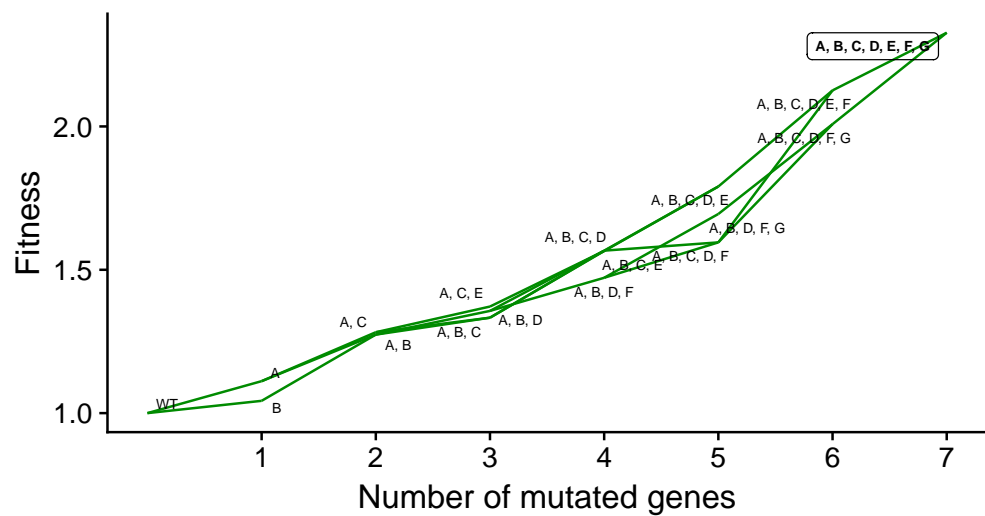



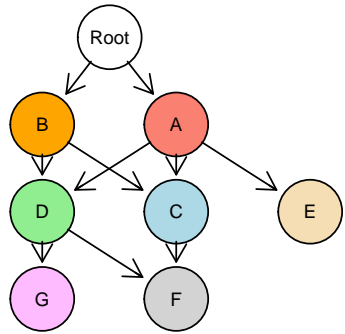

ID NL2plam10LkyAR93o  
 acc genotypes 20  
 peaks no back 1  
 removed edges 0  
 prop rem edges 0

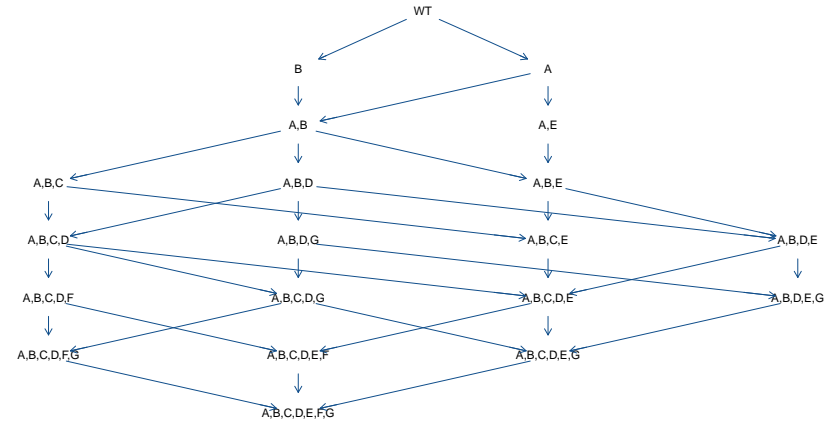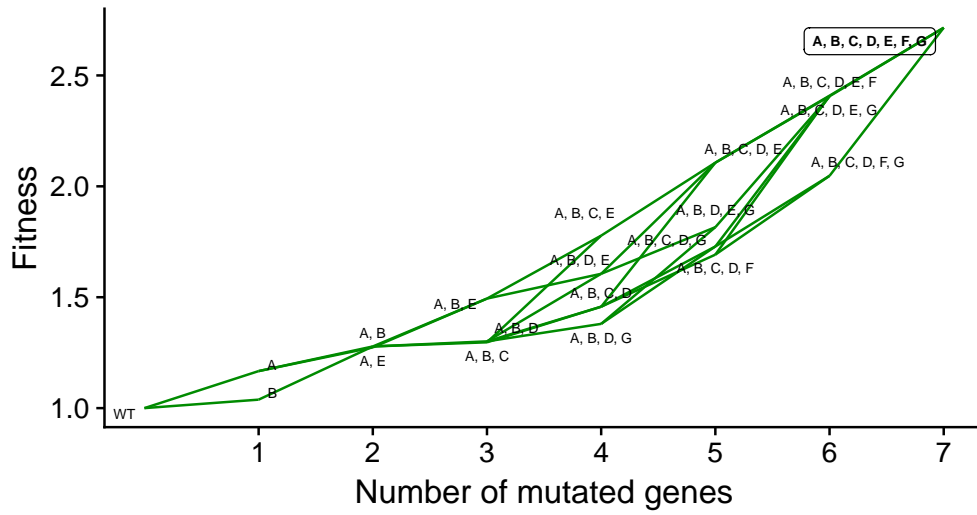

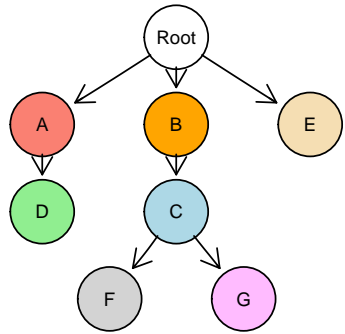

ID **nNXWsbAmrror4S1el**  
 acc genotypes **36**  
 peaks no back **1**  
 removed edges **0**  
 prop rem edges **0**

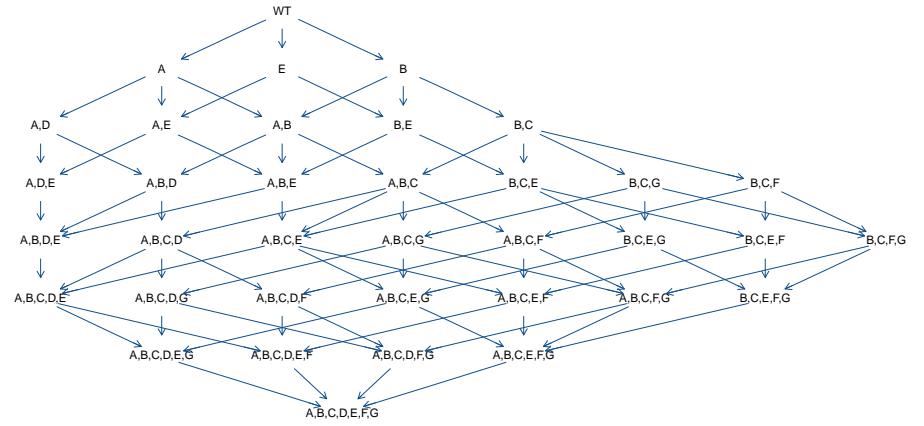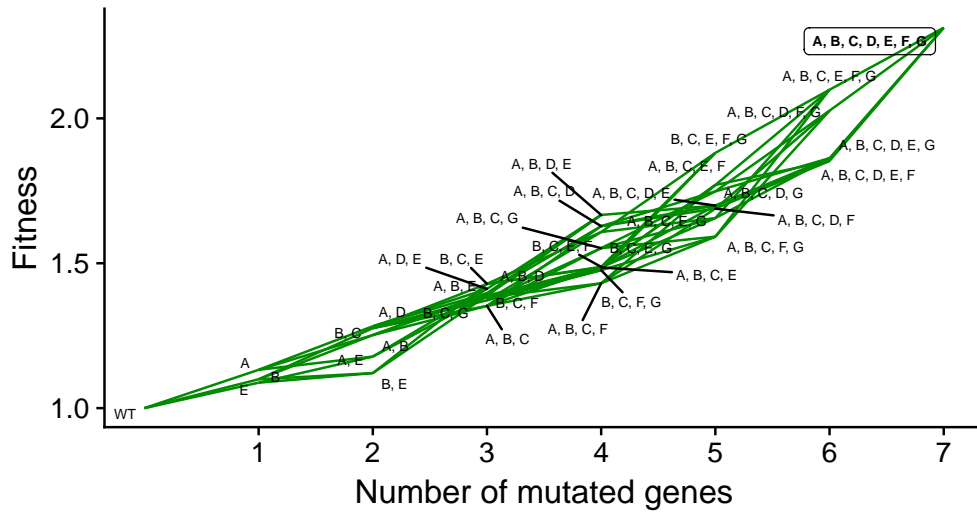

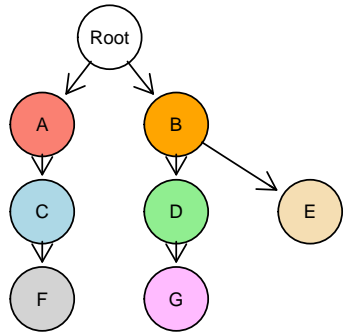

ID NP6G6AnYJEoAMZc  
 acc genotypes 28  
 peaks no back 1  
 removed edges 0  
 prop rem edges 0

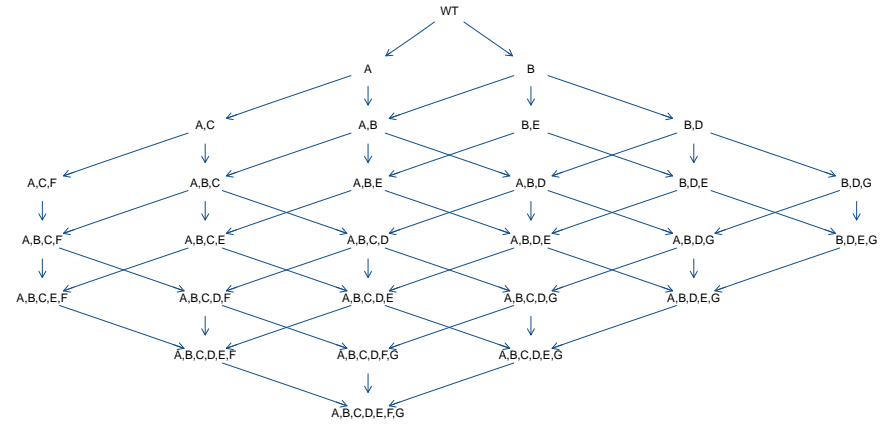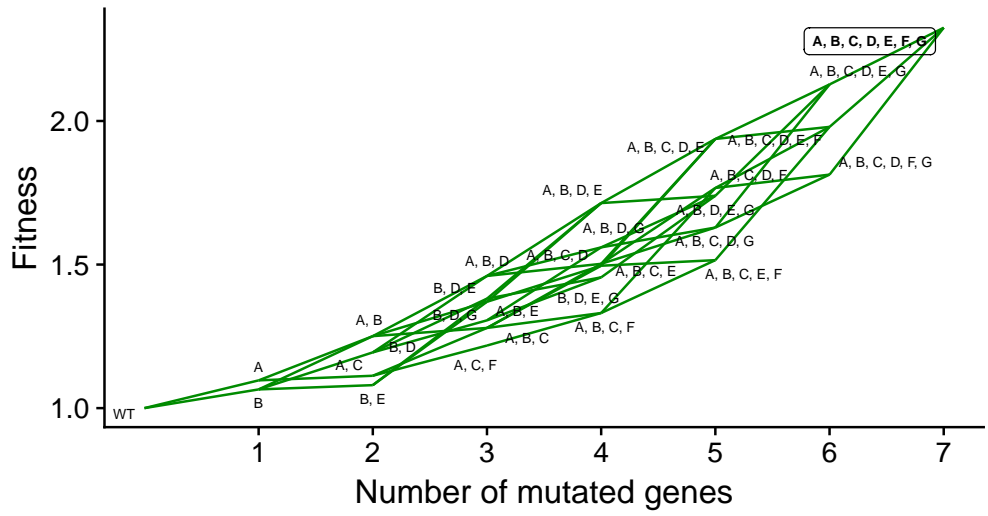



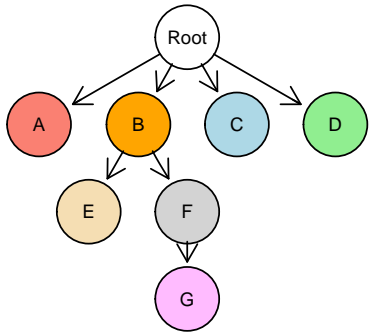

ID **NQkZsXiFwR5kJZQb**  
 acc genotypes **56**  
 peaks no back 1  
 removed edges 0  
 prop rem edges 0

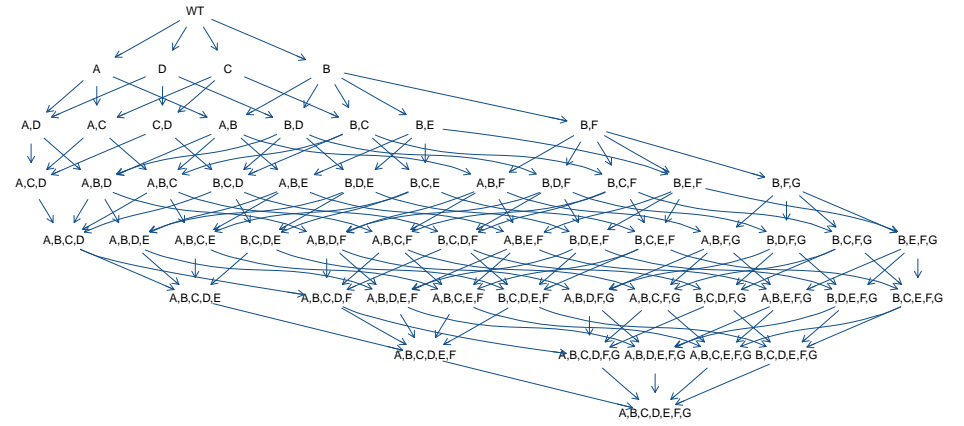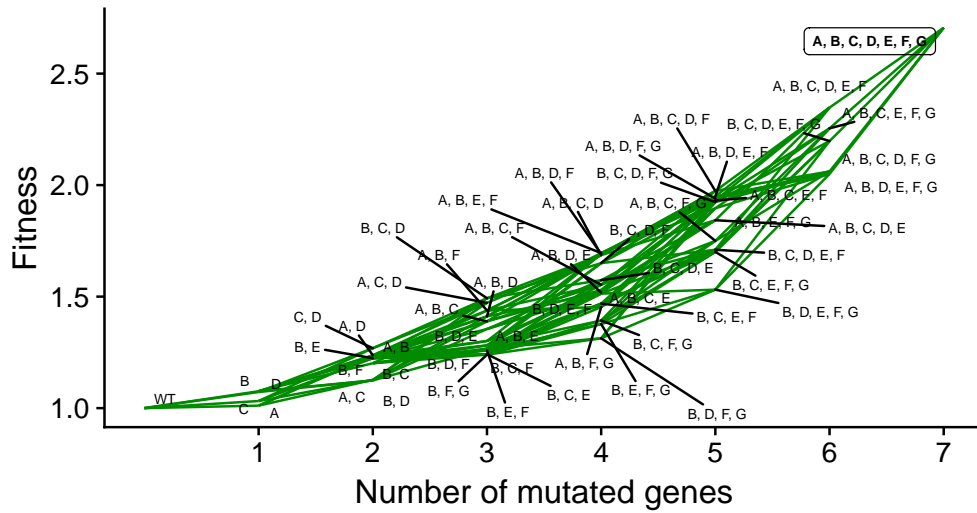

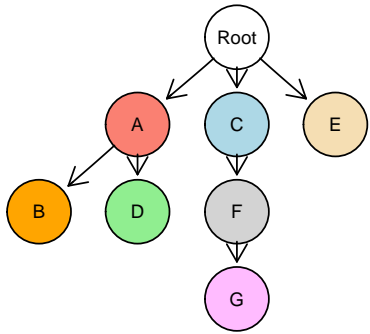

ID O9dkG7dXRCSpbF7s  
 acc genotypes 40  
 peaks no back 1  
 removed edges 0  
 prop rem edges 0

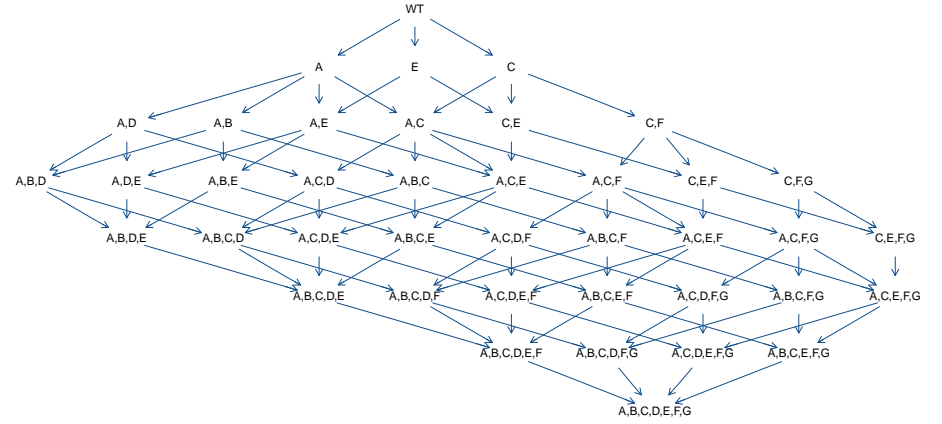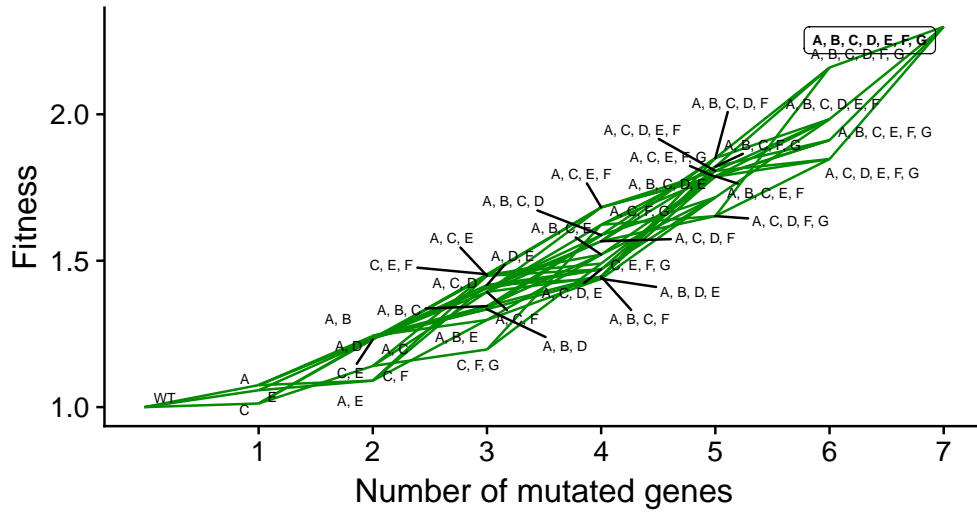

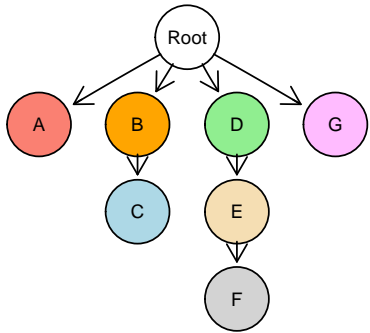

ID o9zATJwfW4X1dLDs  
 acc genotypes 48  
 peaks no back 1  
 removed edges 0  
 prop rem edges 0

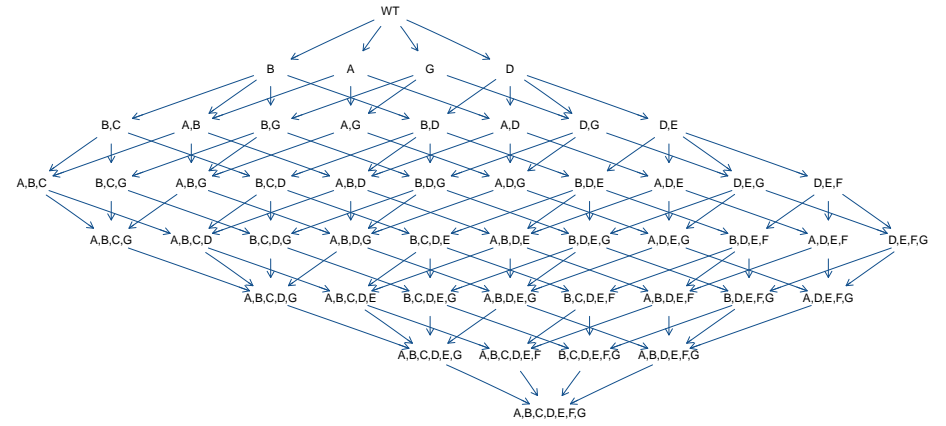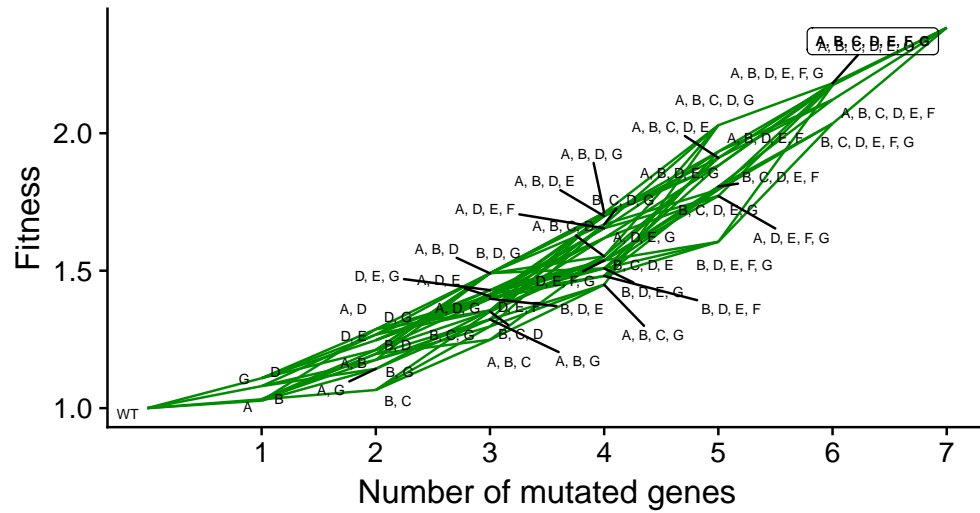

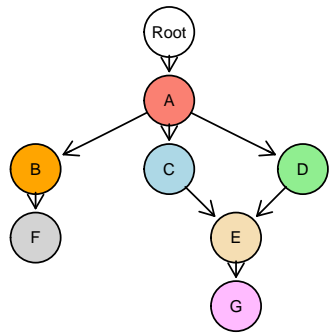

ID oZm9q2fpYypg1gEQ  
 acc genotypes 19  
 peaks no back 1  
 removed edges 0  
 prop rem edges 0

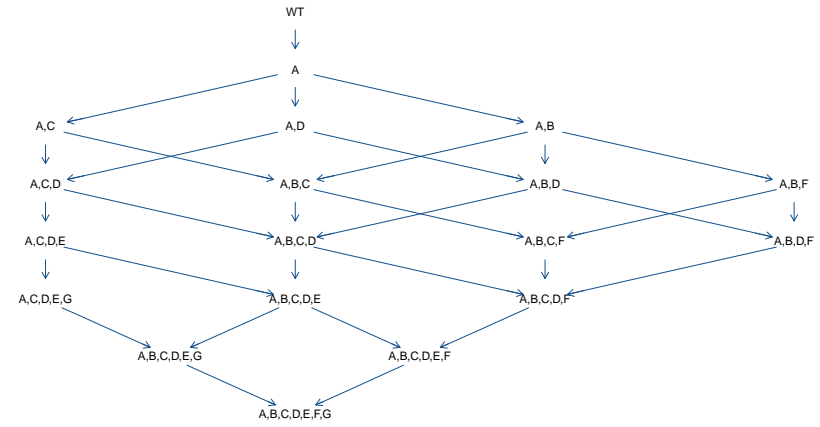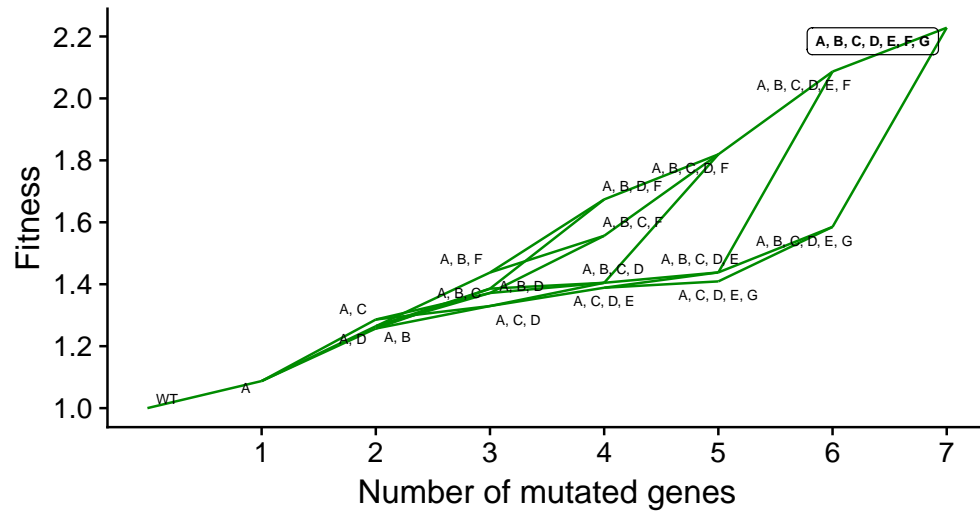

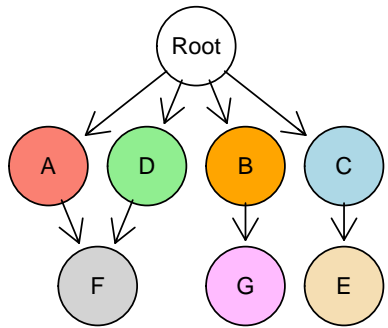

ID P6fkPLOb9jfitZiv  
 acc genotypes 45  
 peaks no back 1  
 removed edges 0  
 prop rem edges 0

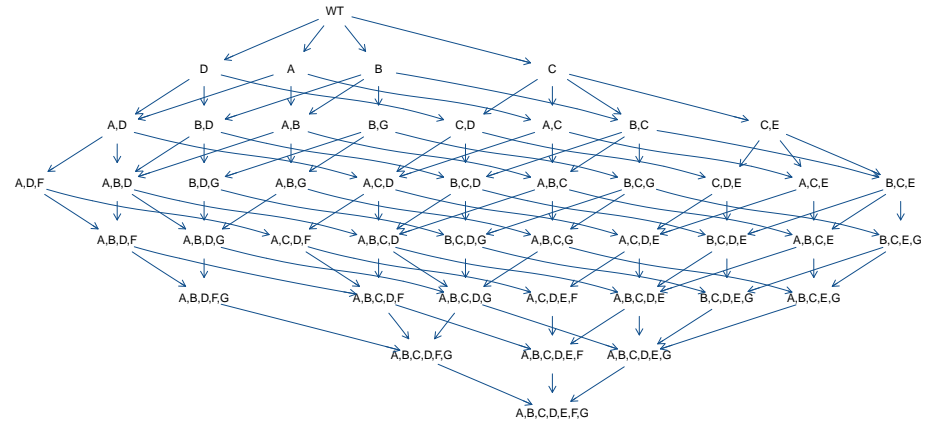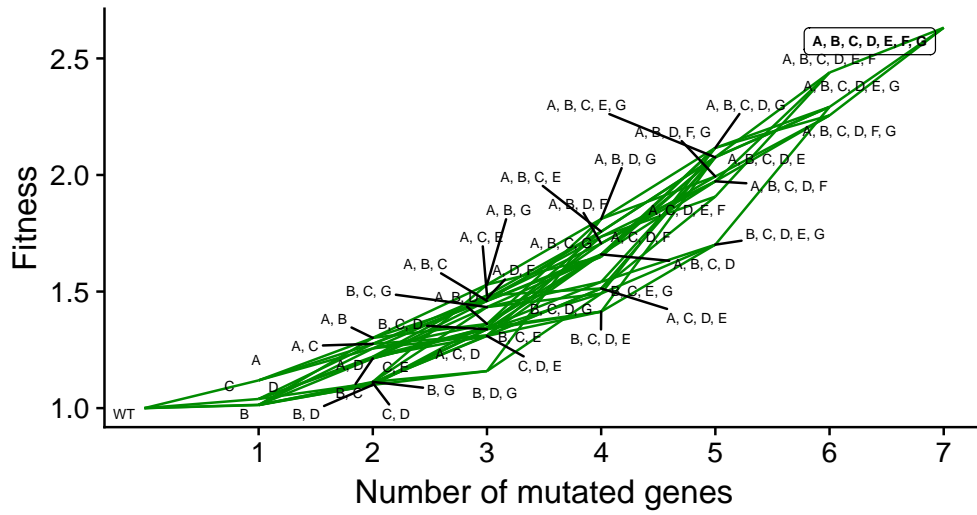



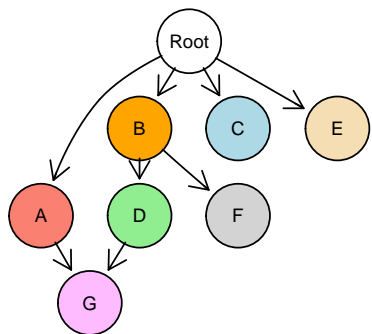

ID [pJAvDquRk5XGCjrp](#)  
 acc genotypes 48  
 peaks no back 1  
 removed edges 0  
 prop rem edges 0

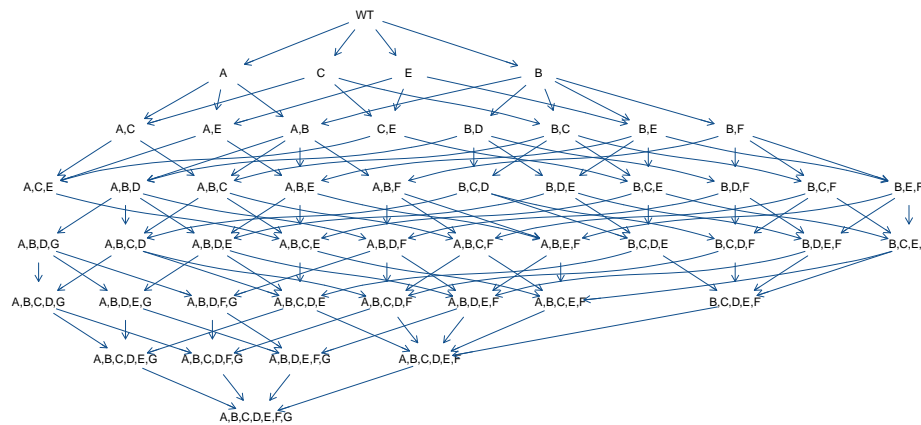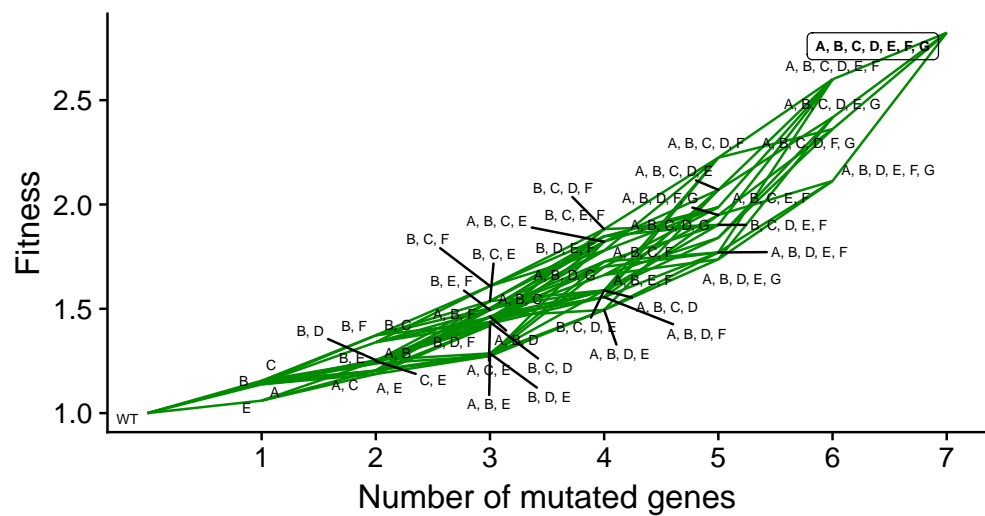

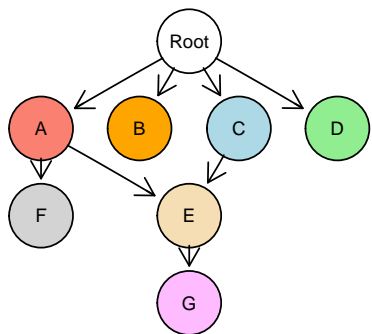

ID **PQUizfzfbmdE7gFY**  
 acc genotypes **40**  
 peaks no back **1**  
 removed edges **0**  
 prop rem edges **0**

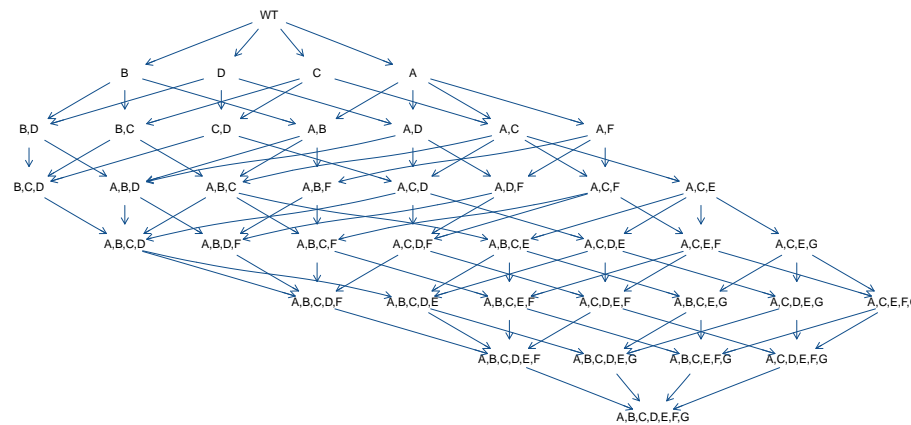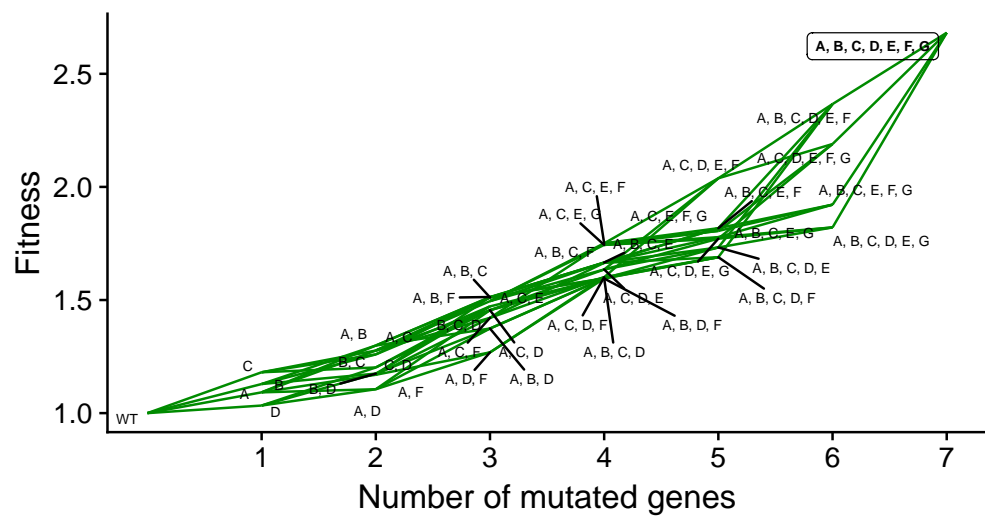



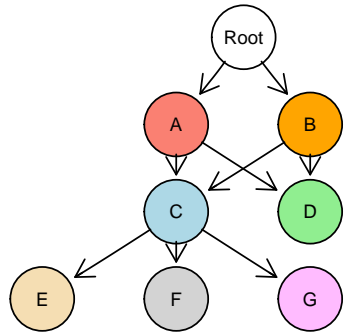

ID **q10sOtkvPmaBzPDOV**  
 acc genotypes **21**  
 peaks no back **1**  
 removed edges **0**  
 prop rem edges **0**

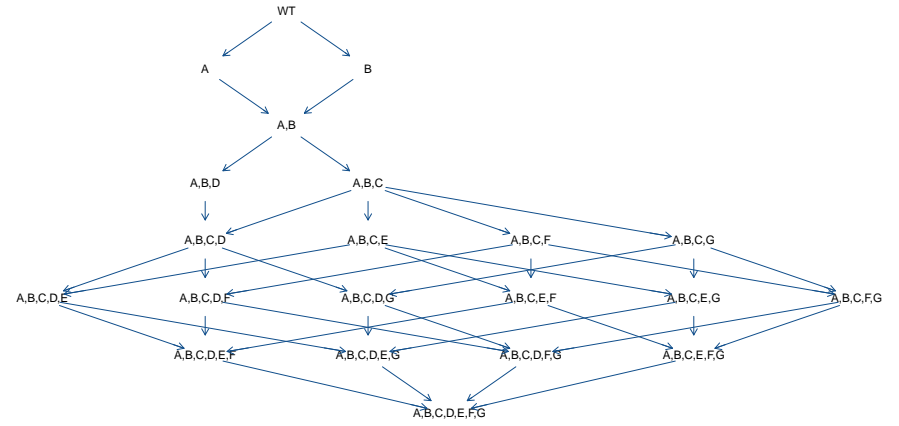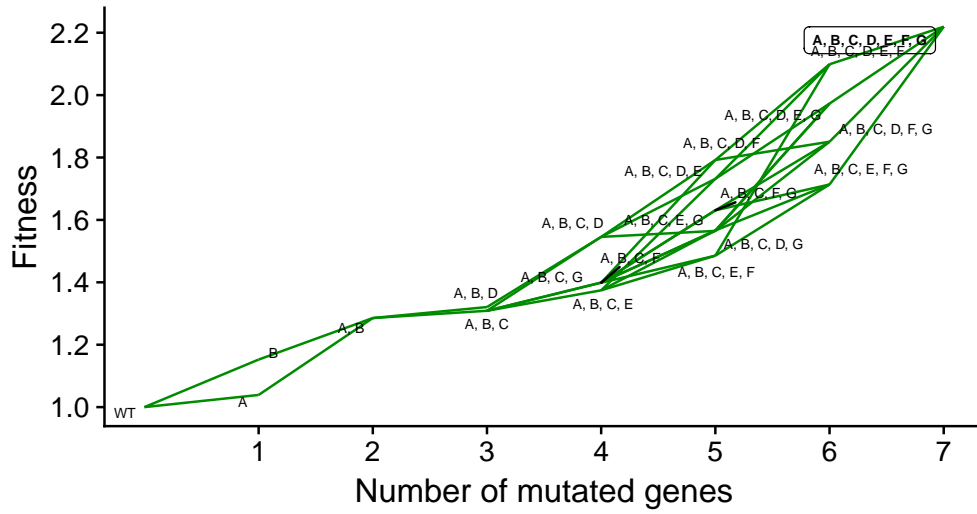

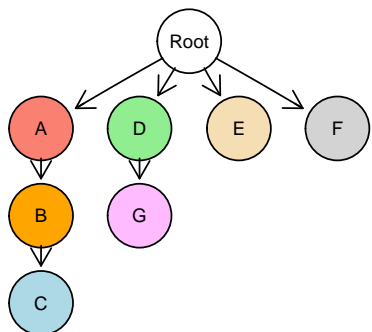

ID **q10upXvME3iKLaWcZ**  
 acc genotypes **48**  
 peaks no back 1  
 removed edges 0  
 prop rem edges 0

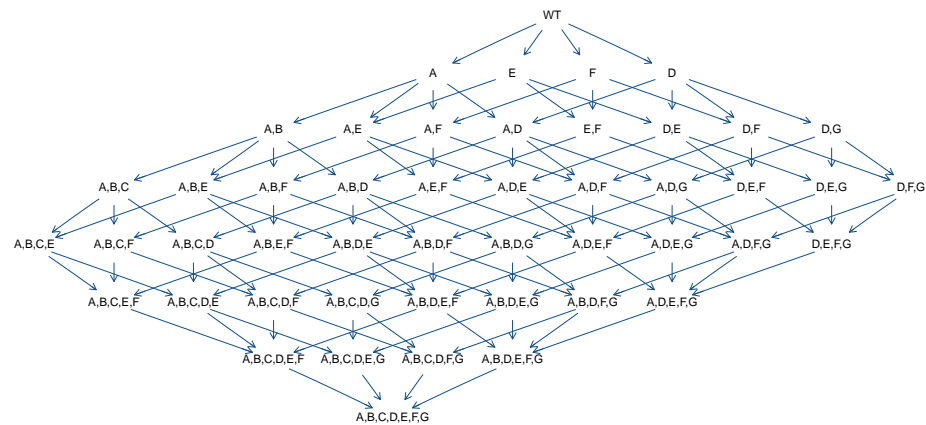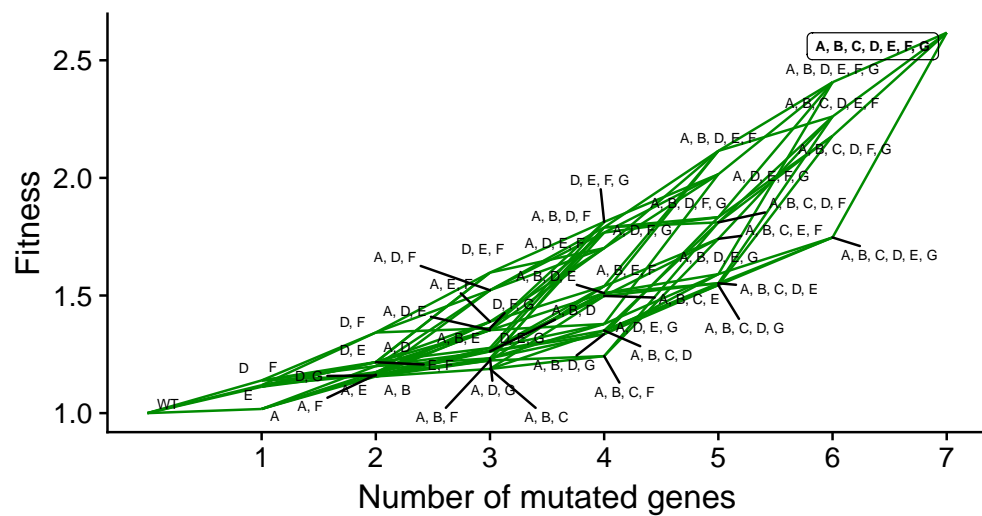

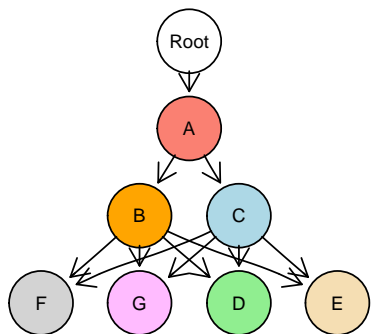

ID **q3bB6O4aHcWy2GNL**  
 acc genotypes **20**  
 peaks no back 1  
 removed edges 0  
 prop rem edges 0

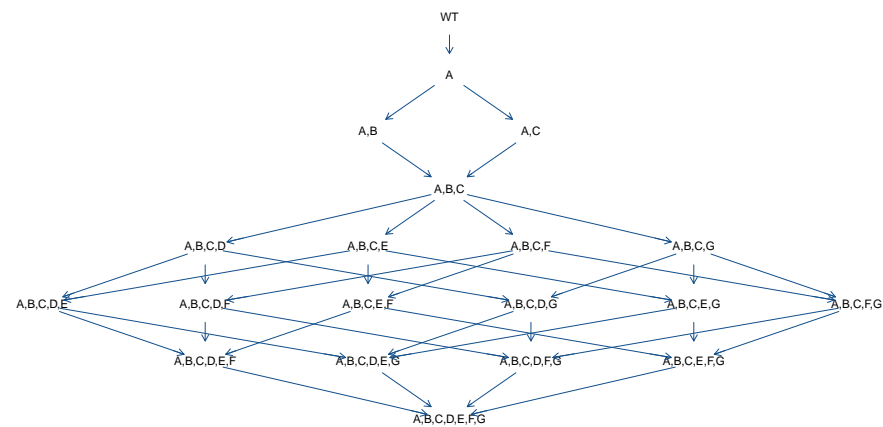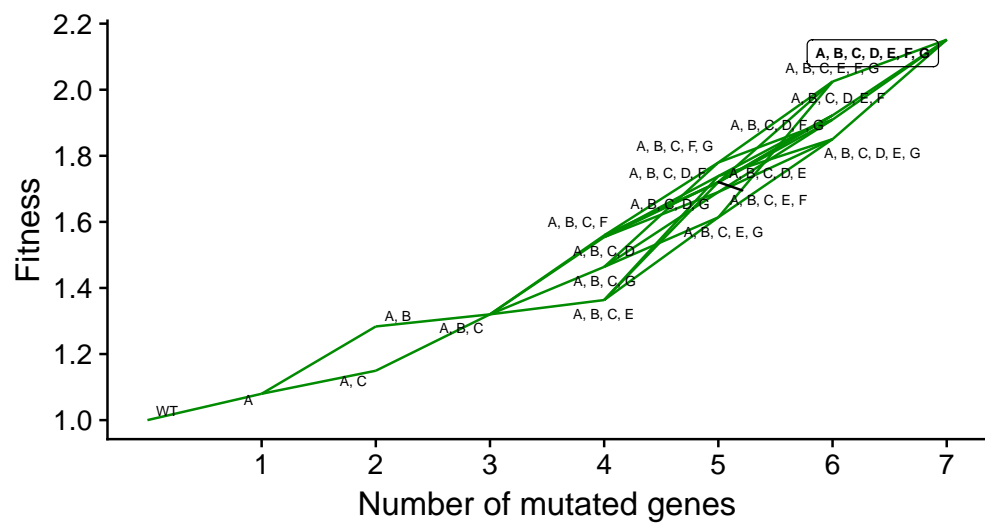

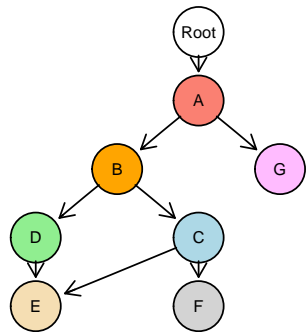

ID **qDTXWJ10Vx4dad6eV**  
 acc genotypes **19**  
 peaks no back **1**  
 removed edges **0**  
 prop rem edges **0**

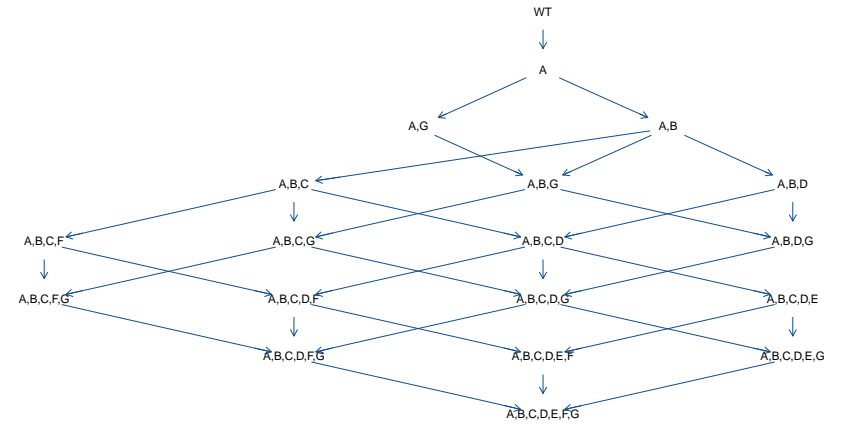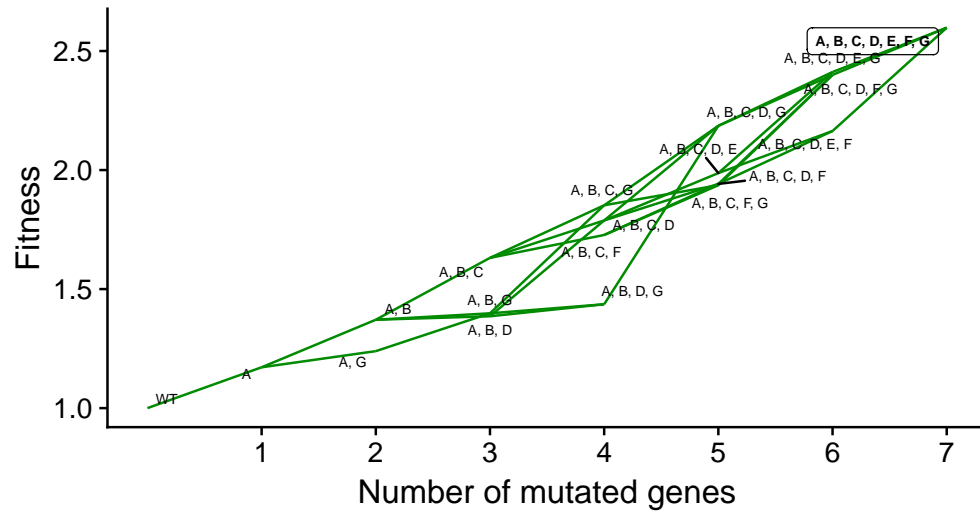

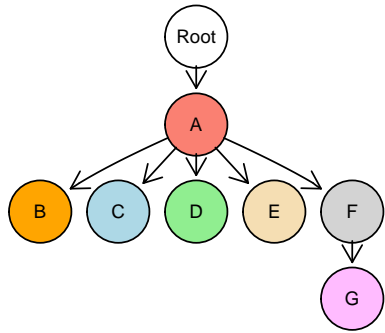

ID **qdVBLPcBGWHlqm6a**  
 acc genotypes **49**  
 peaks no back **1**  
 removed edges **0**  
 prop rem edges **0**

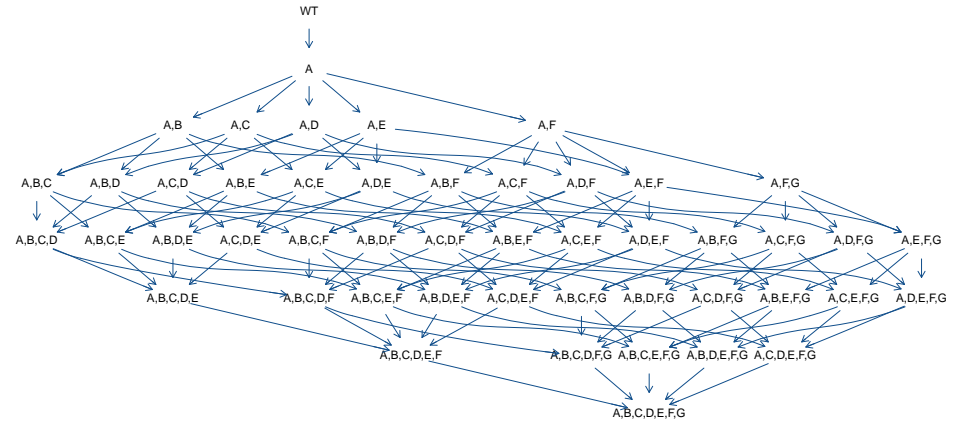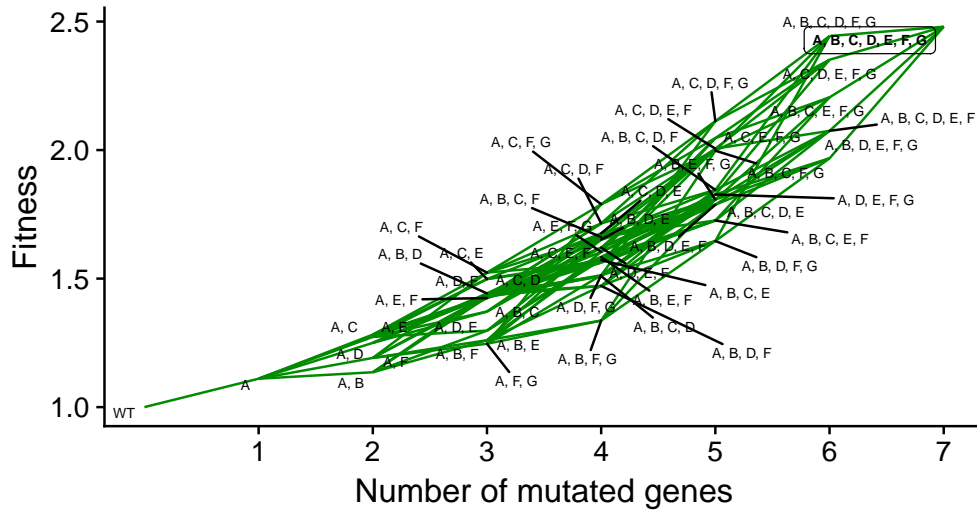

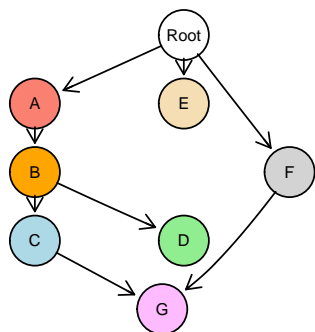

ID **QfKhJqFLfL10D8u110**  
 acc genotypes **28**  
 peaks no back 1  
 removed edges 0  
 prop rem edges 0

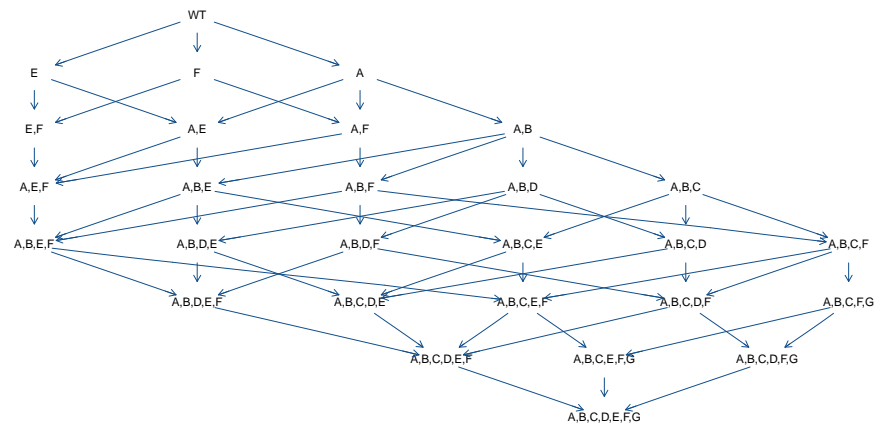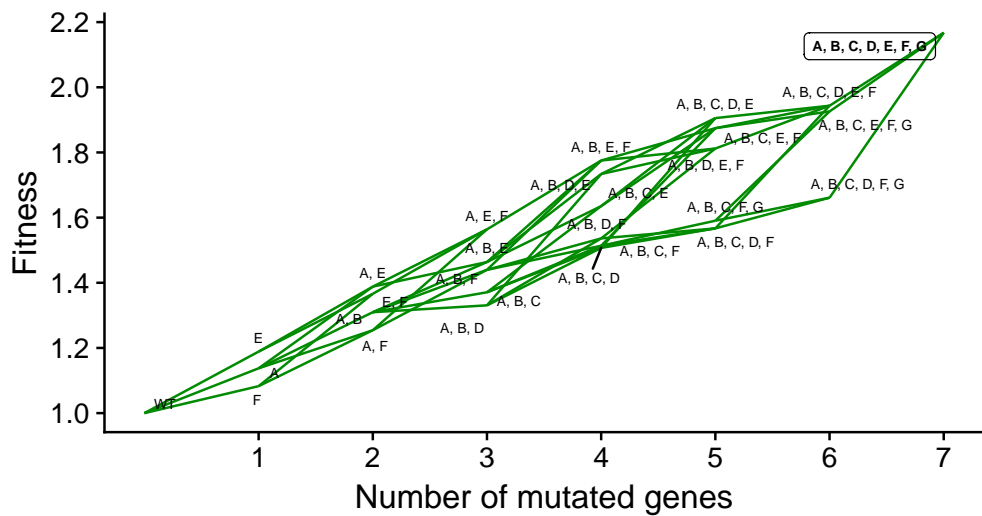

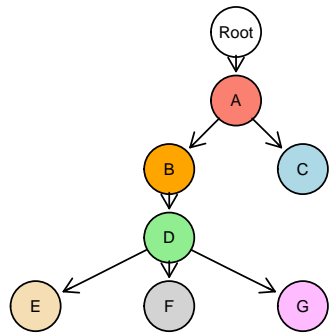

ID [qhzHLgirL8adNfAJ](#)  
 acc genotypes 21  
 peaks no back 1  
 removed edges 0  
 prop rem edges 0

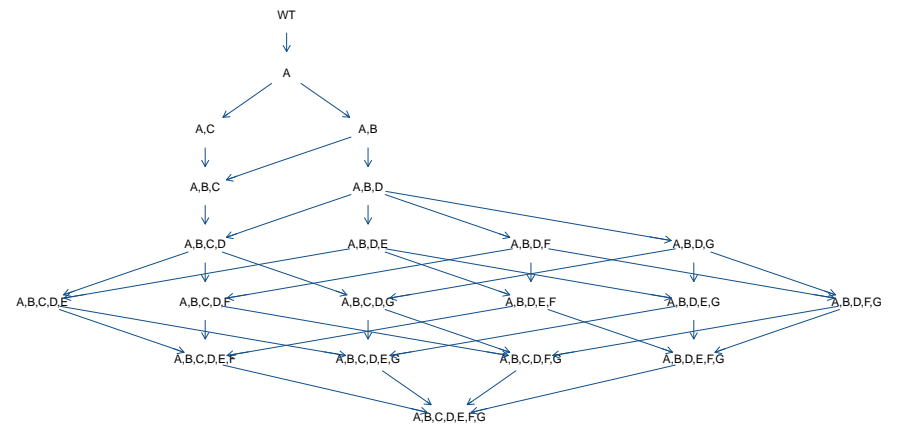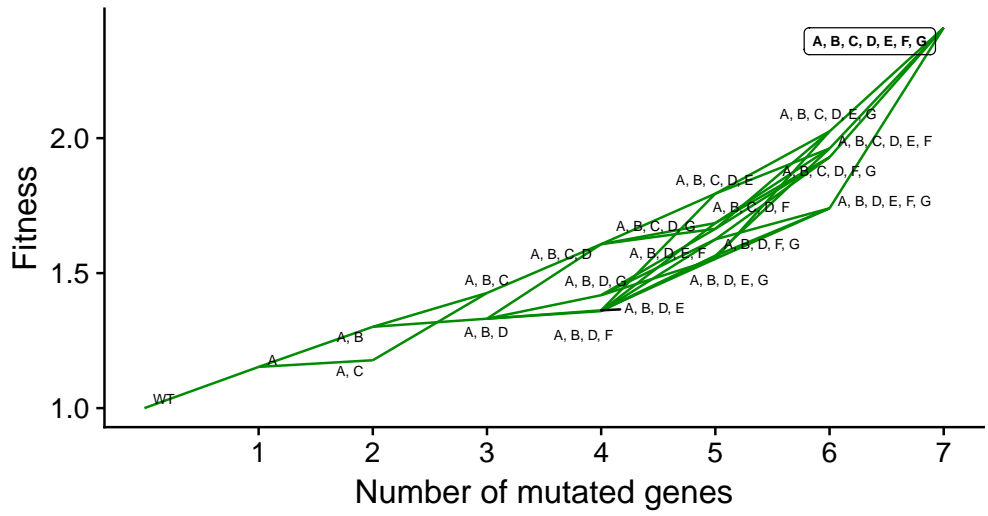

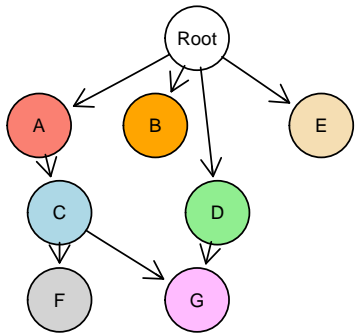

ID **qIEabZH111rt10AQ2**  
 acc genotypes **40**  
 peaks no back **1**  
 removed edges **0**  
 prop rem edges **0**

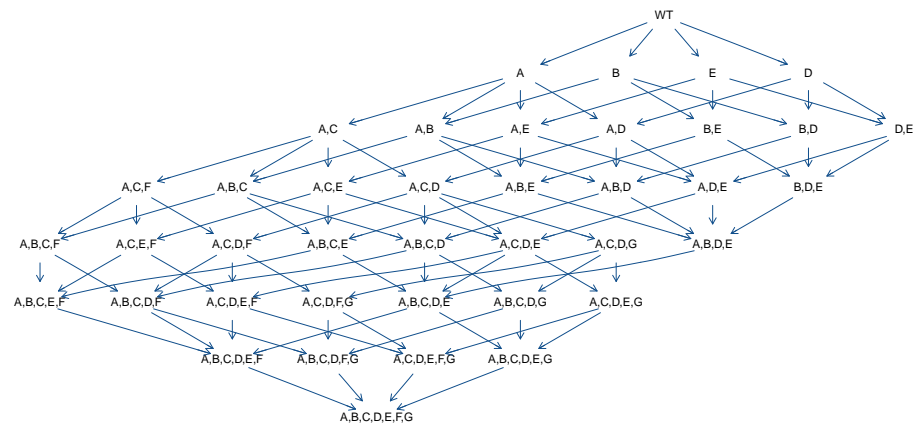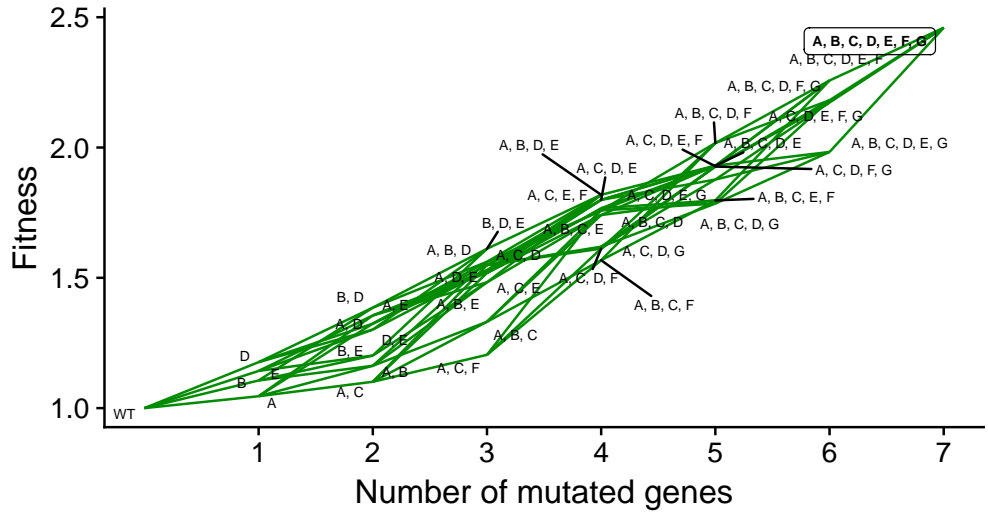



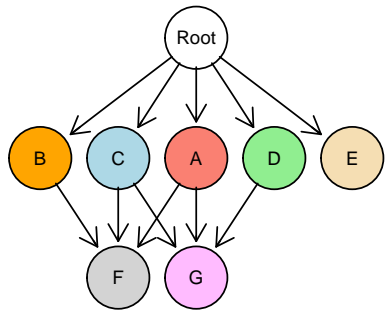

ID **qsBbMjGmsMVjLZVW**  
 acc genotypes **42**  
 peaks no back 1  
 removed edges 0  
 prop rem edges 0

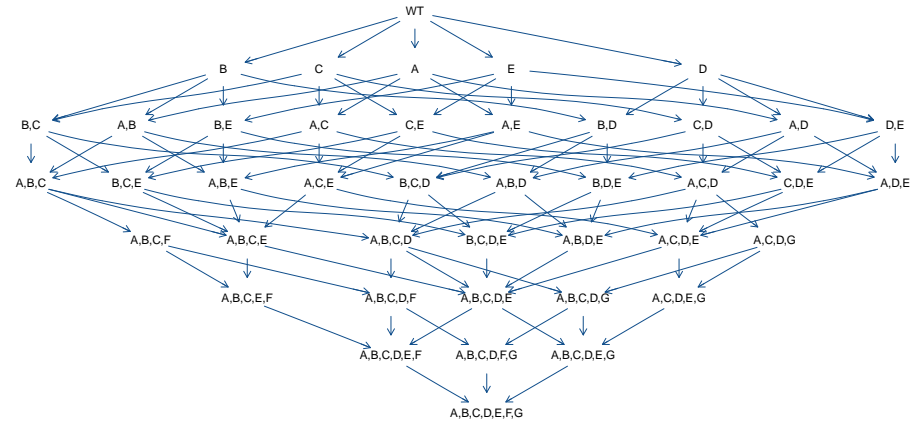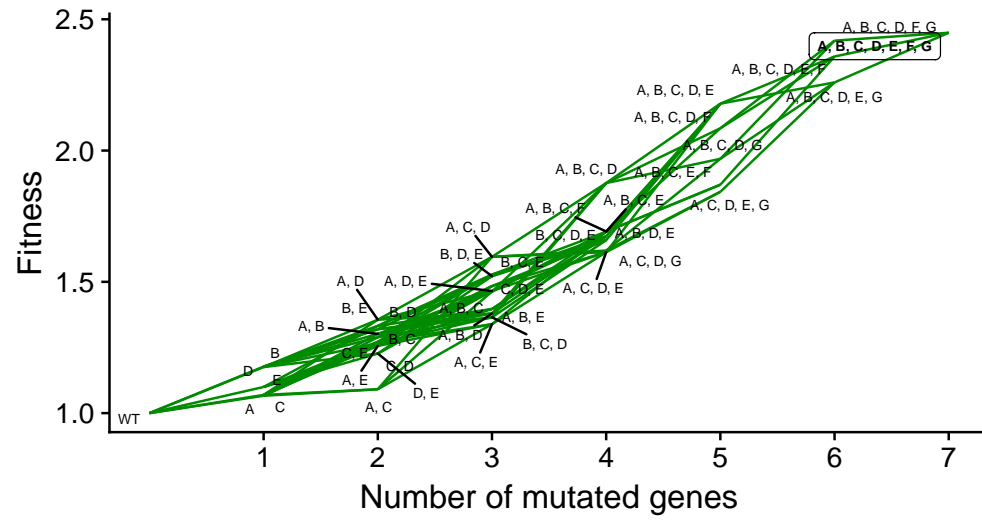

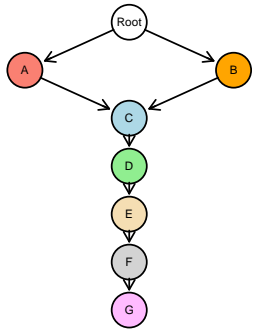

ID [QTVh104soQUgOBfKi](#)  
 acc genotypes 9  
 peaks no back 1  
 removed edges 0  
 prop rem edges 0

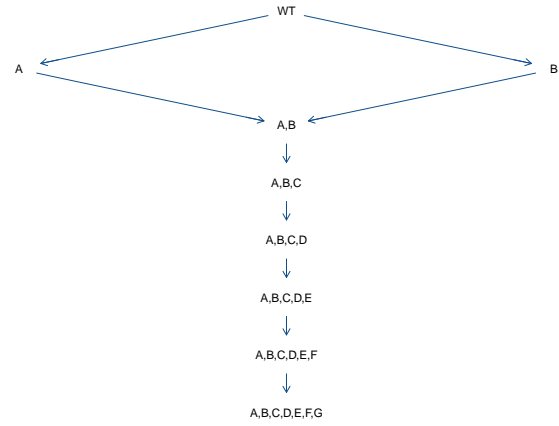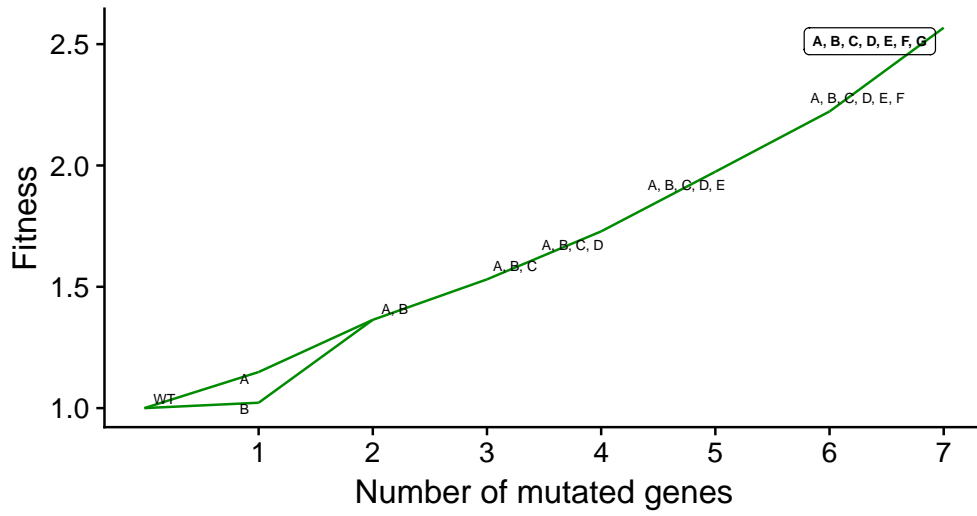

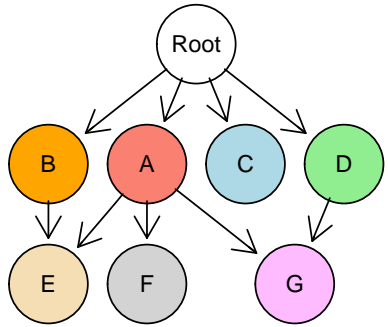

ID [qYgVxb5ntdQ1oibs](#)  
 acc genotypes 44  
 peaks no back 1  
 removed edges 0  
 prop rem edges 0

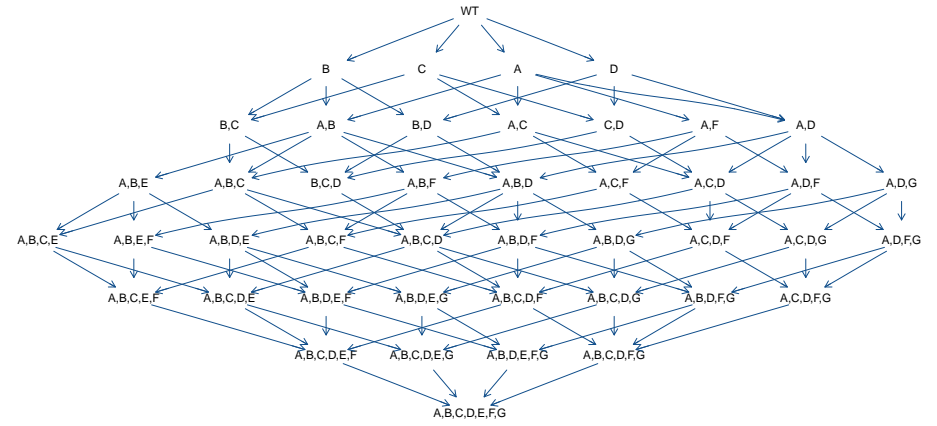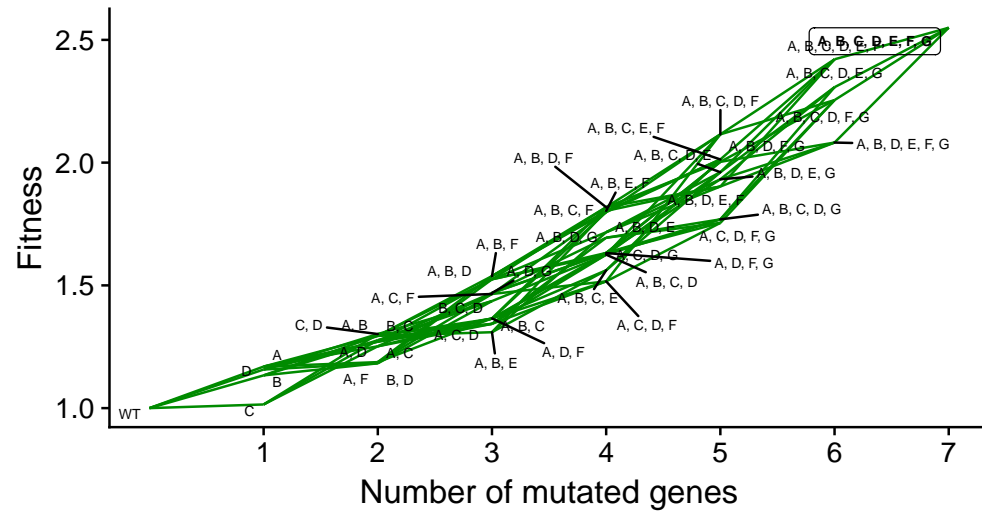

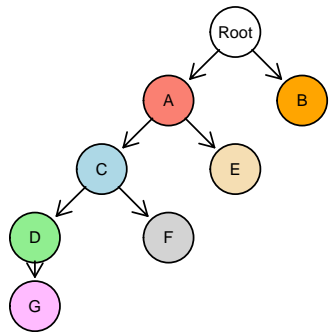

ID **r6gSASnFWWRSp10wF**  
 acc genotypes **30**  
 peaks no back **1**  
 removed edges **0**  
 prop rem edges **0**

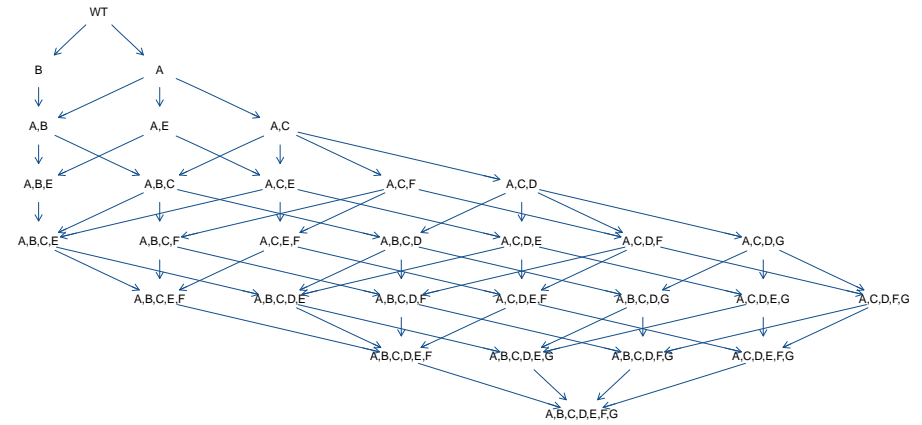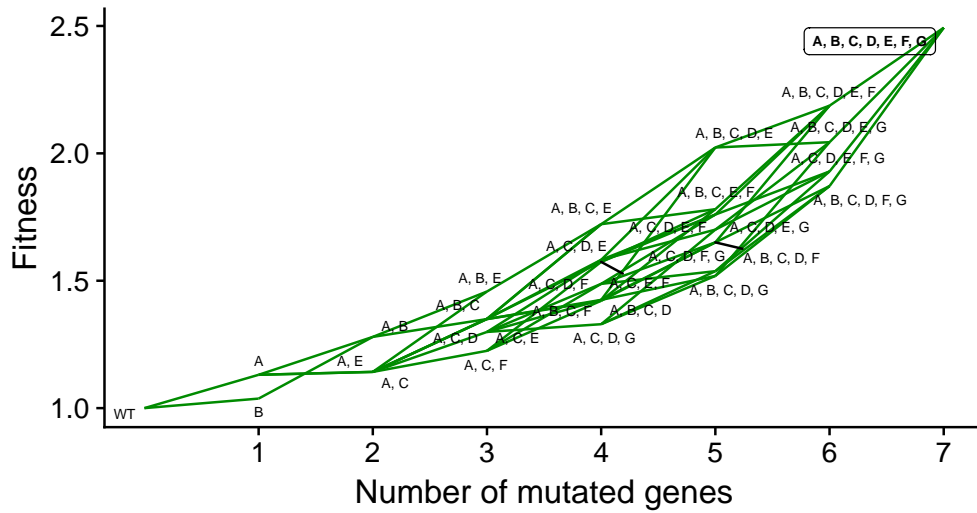

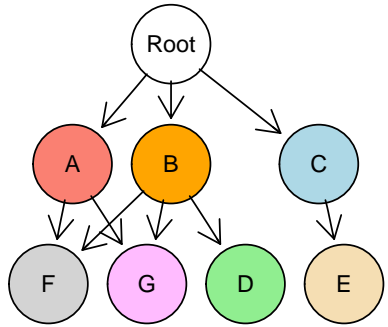

ID [rcySfhqbP6f5Ys45](#)  
 acc genotypes 36  
 peaks no back 1  
 removed edges 0  
 prop rem edges 0

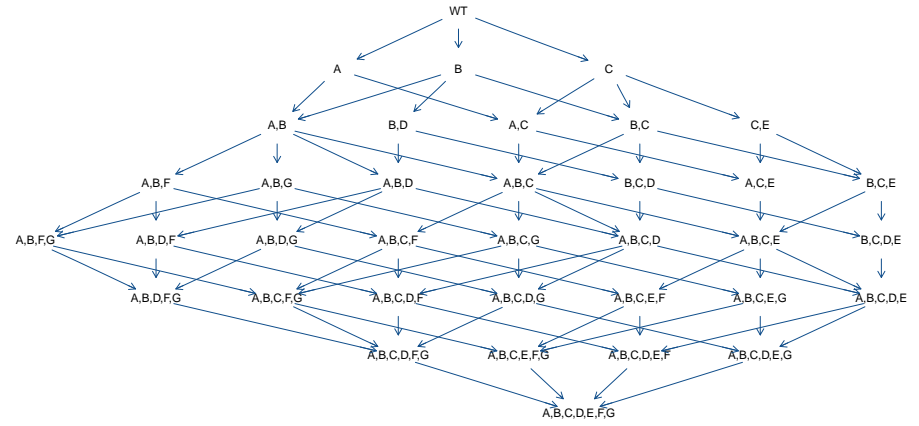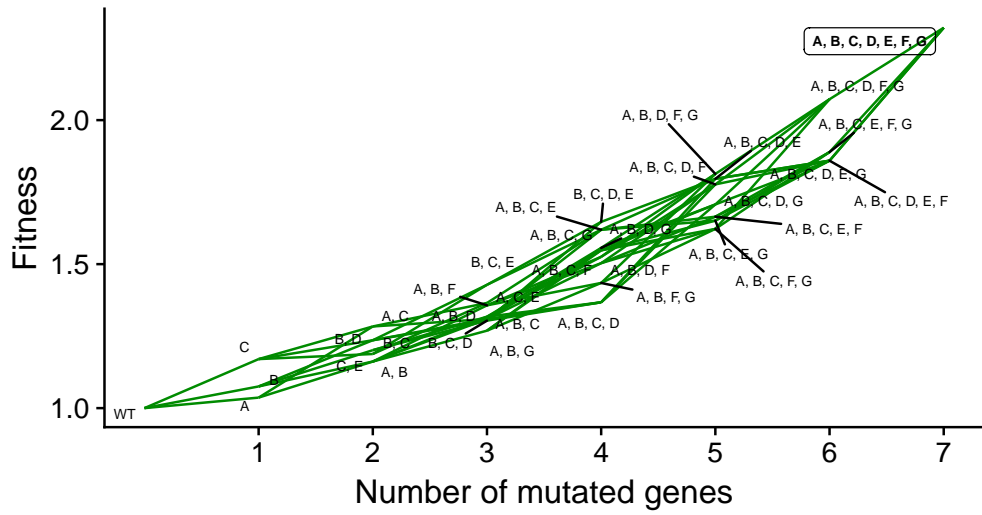

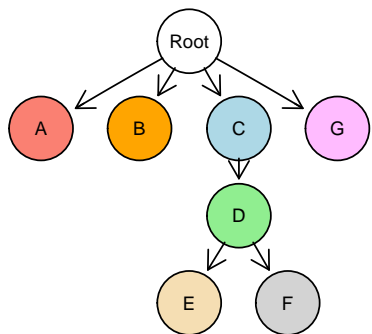

ID **RgRwHICY10NBQ5ya4**  
 acc genotypes **48**  
 peaks no back **1**  
 removed edges **0**  
 prop rem edges **0**

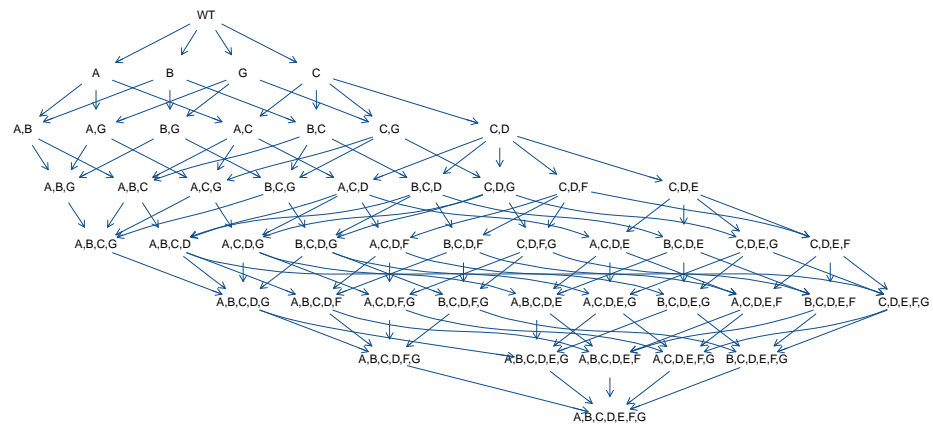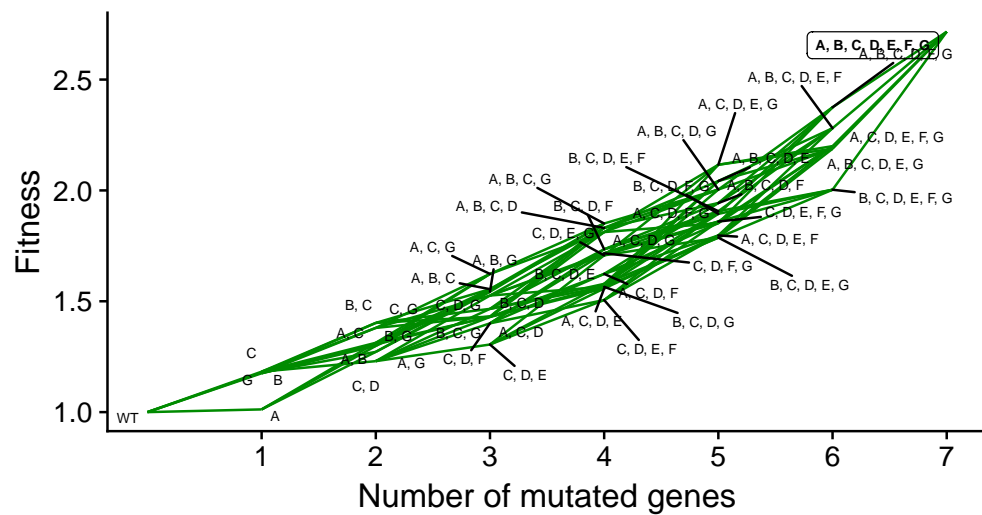

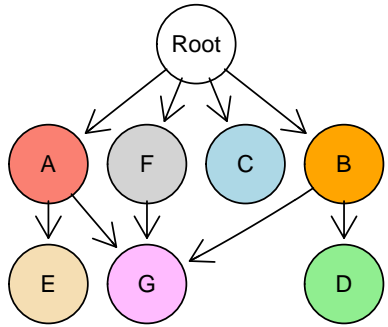

ID **RKaZWcftpCPVxJUF**  
 acc genotypes **44**  
 peaks no back 1  
 removed edges 0  
 prop rem edges 0

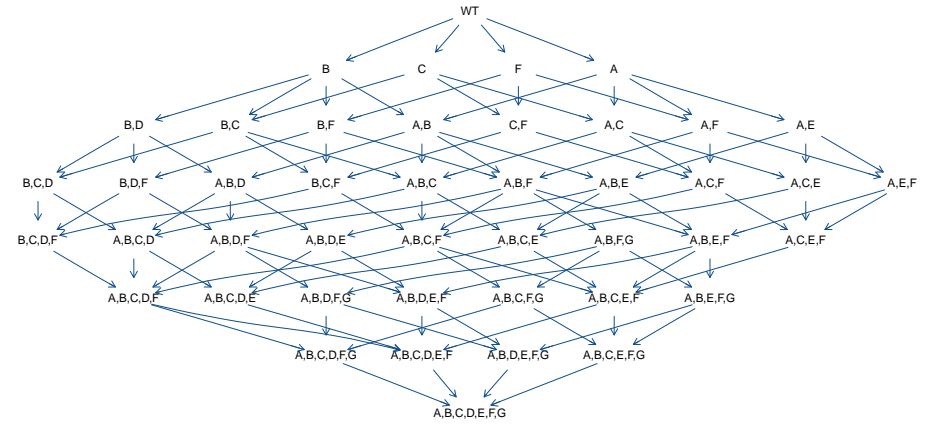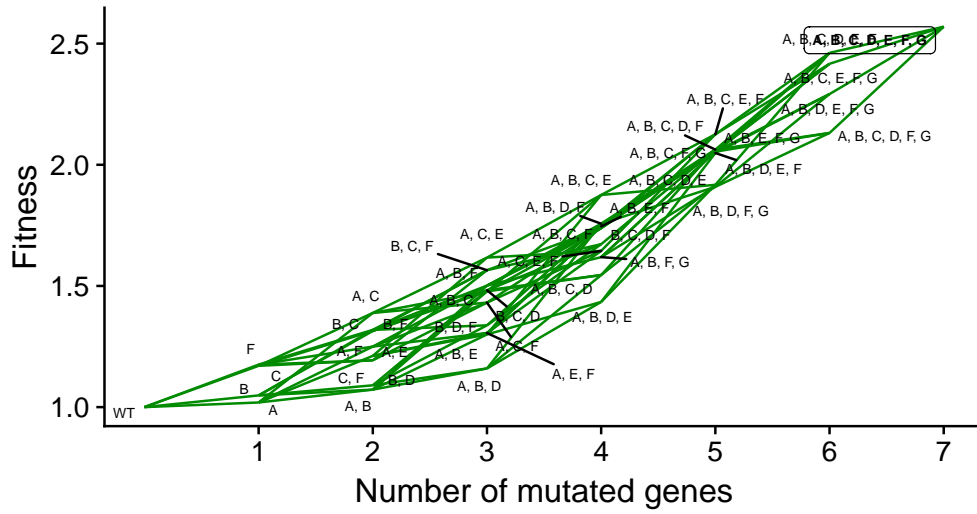

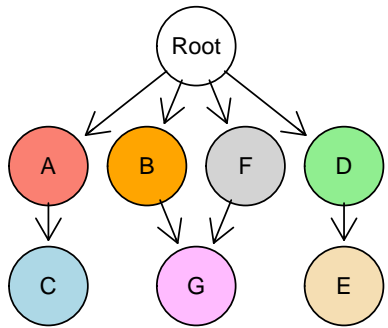

ID rokOvrDugL5VXneF  
 acc genotypes 45  
 peaks no back 1  
 removed edges 0  
 prop rem edges 0

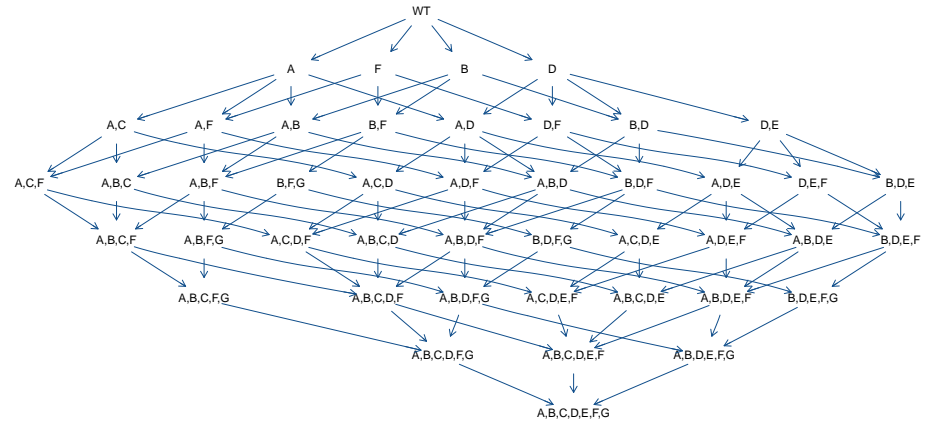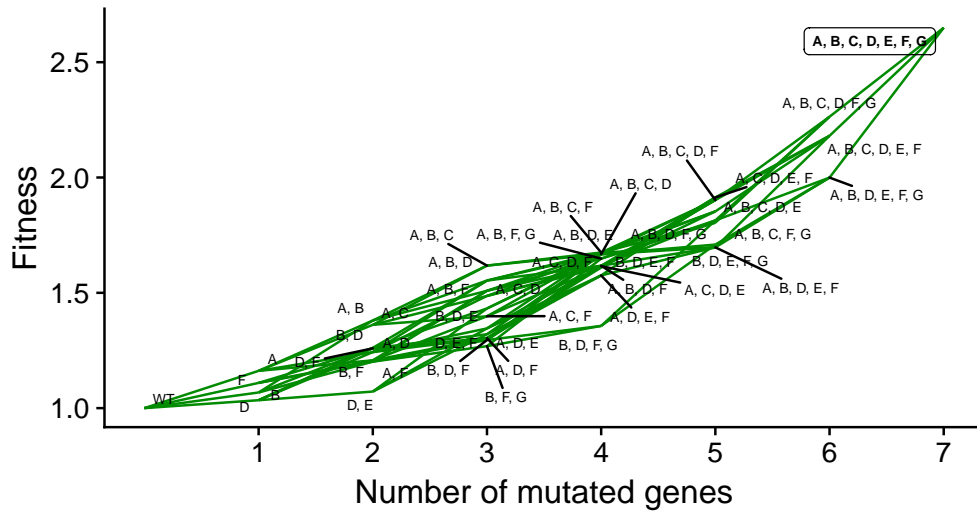



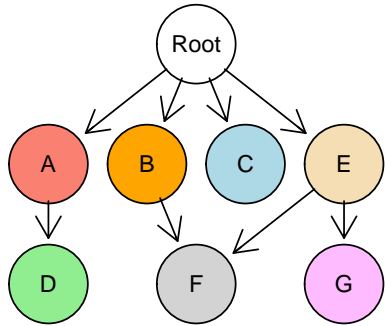

ID ryICF10Z10RhI71ONm  
 acc genotypes 48  
 peaks no back 1  
 removed edges 0  
 prop rem edges 0

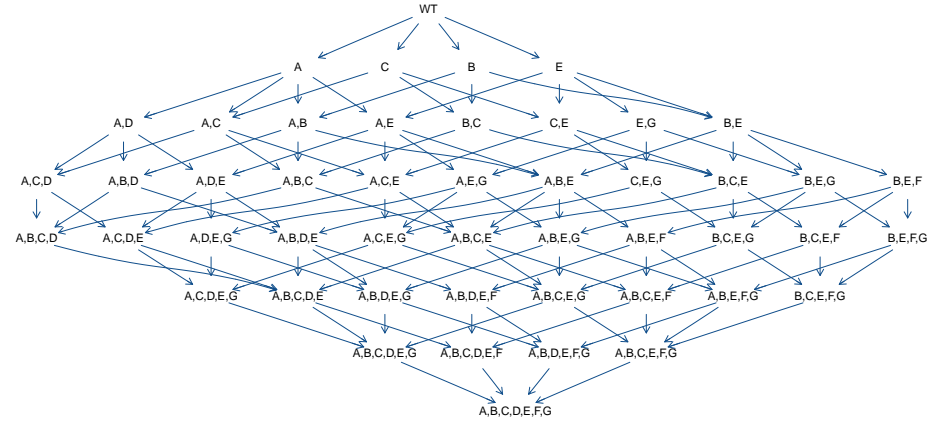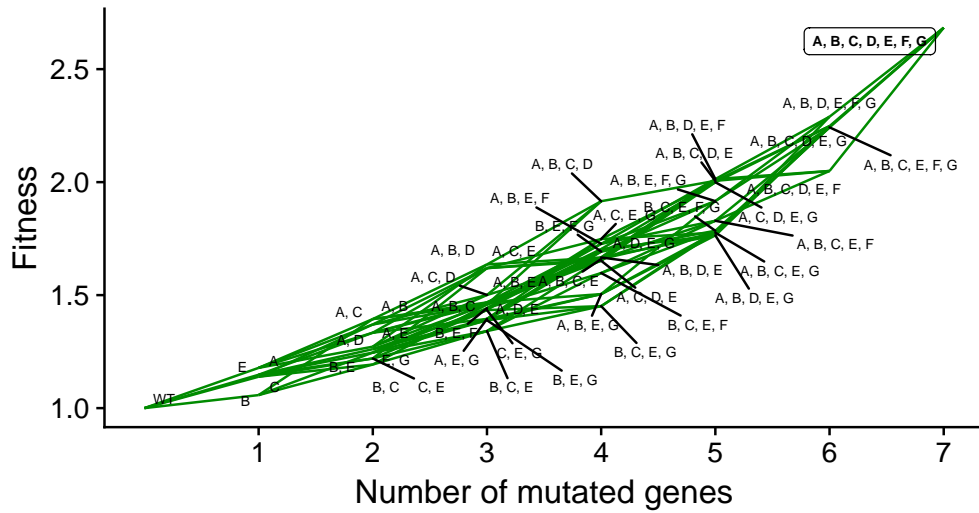

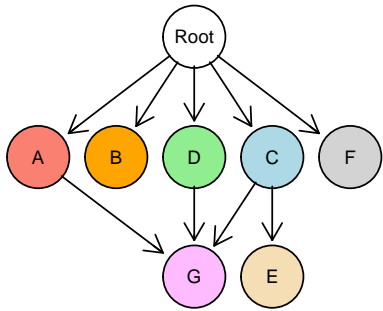

ID [s6QENCe4O6bJtquJ](#)  
 acc genotypes 56  
 peaks no back 1  
 removed edges 0  
 prop rem edges 0

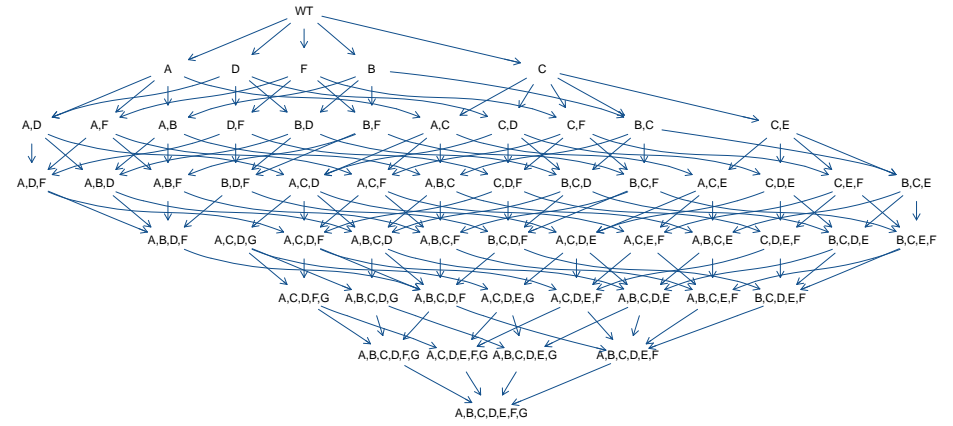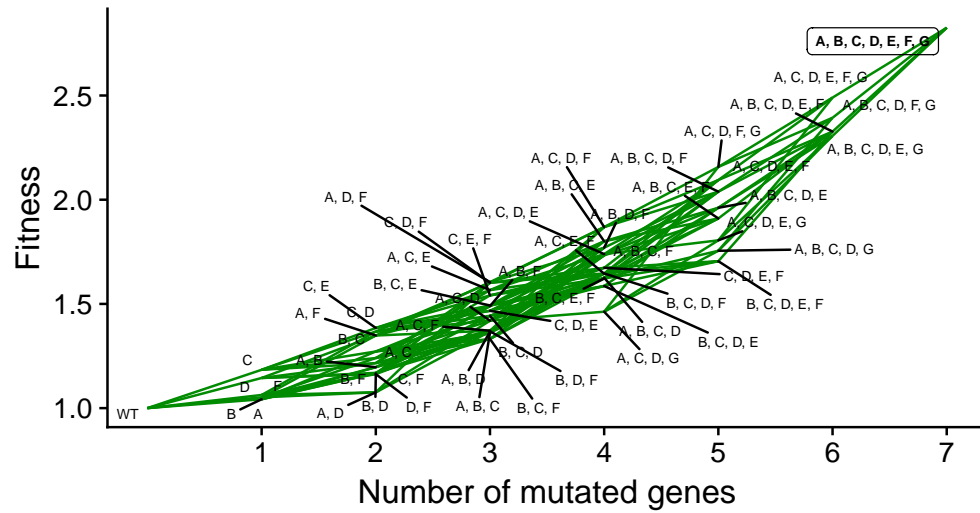

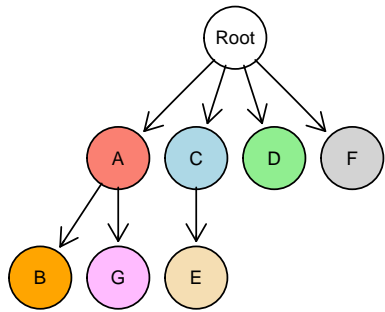

ID [SeULzsEELispb2JY](#)  
 acc genotypes 60  
 peaks no back 1  
 removed edges 0  
 prop rem edges 0

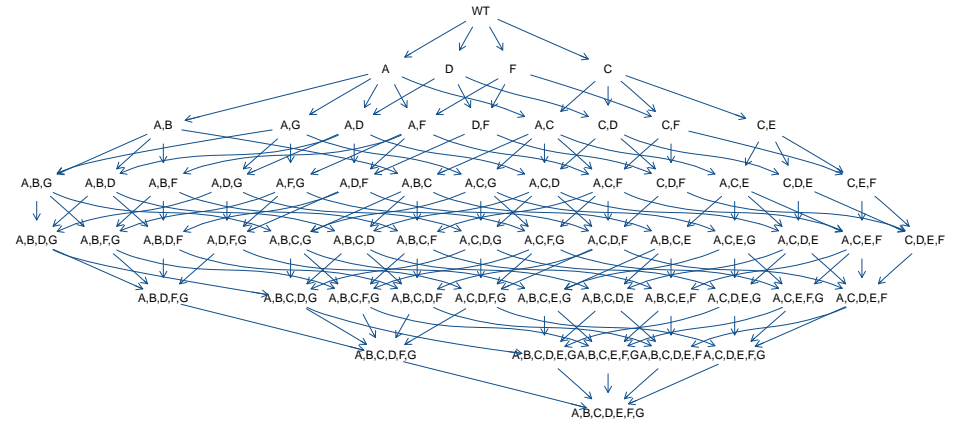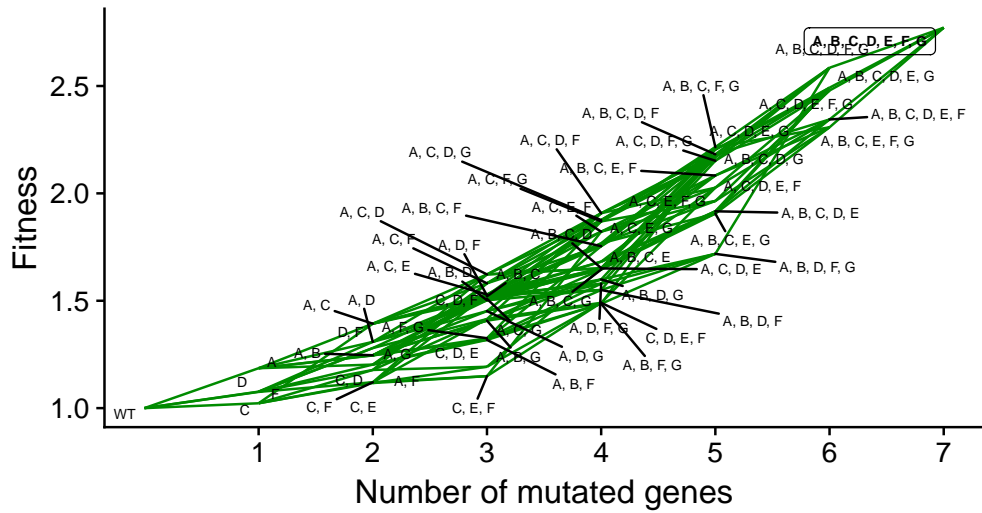

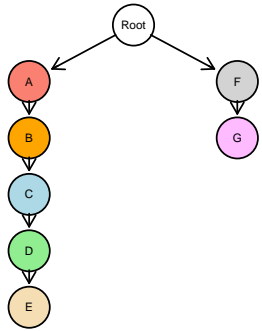

ID **sJxeTmNhXKbZaZnQ**  
 acc genotypes **18**  
 peaks no back 1  
 removed edges 0  
 prop rem edges 0

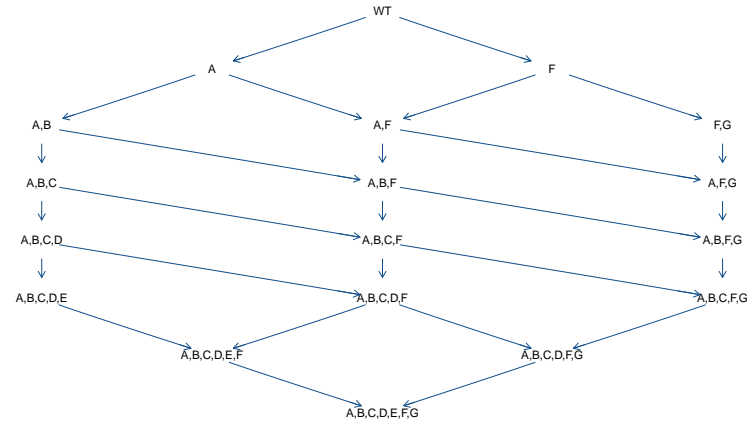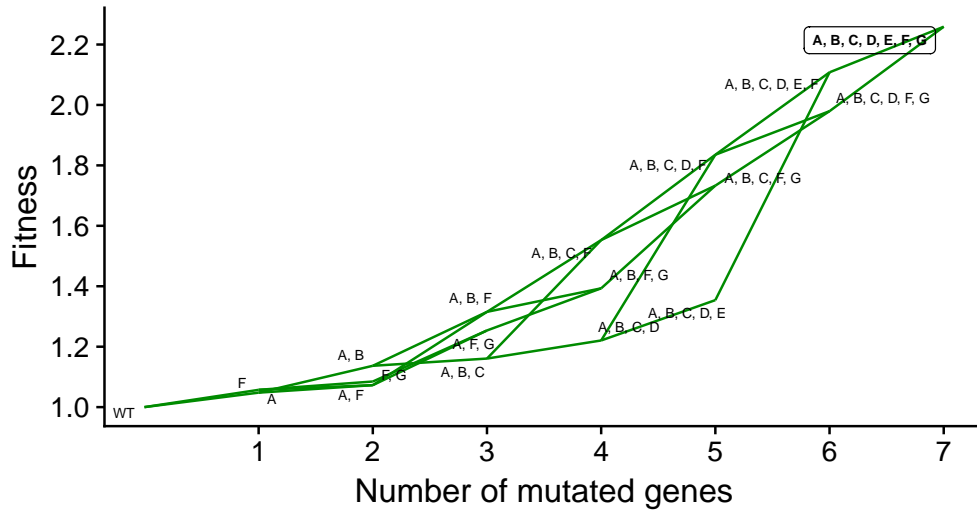

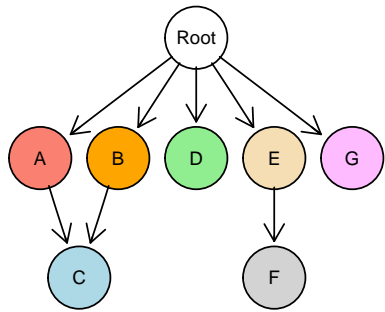

ID SUTWyy1ERdbEqE8j  
 acc genotypes 60  
 peaks no back 1  
 removed edges 0  
 prop rem edges 0

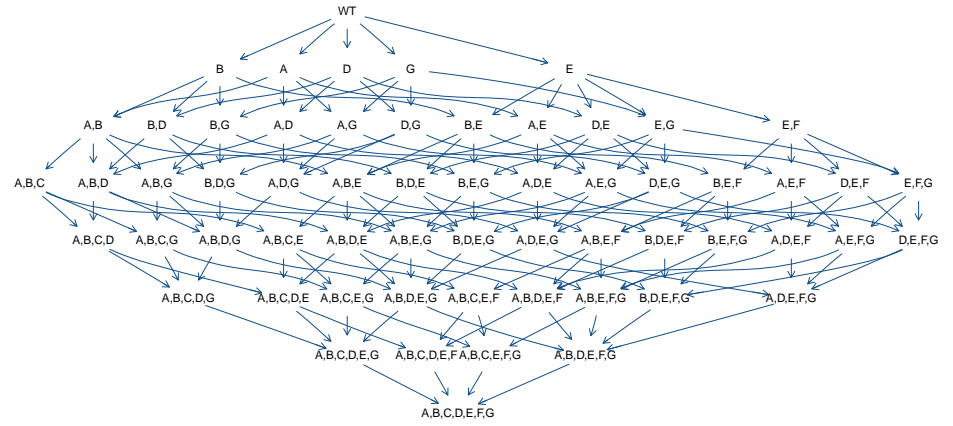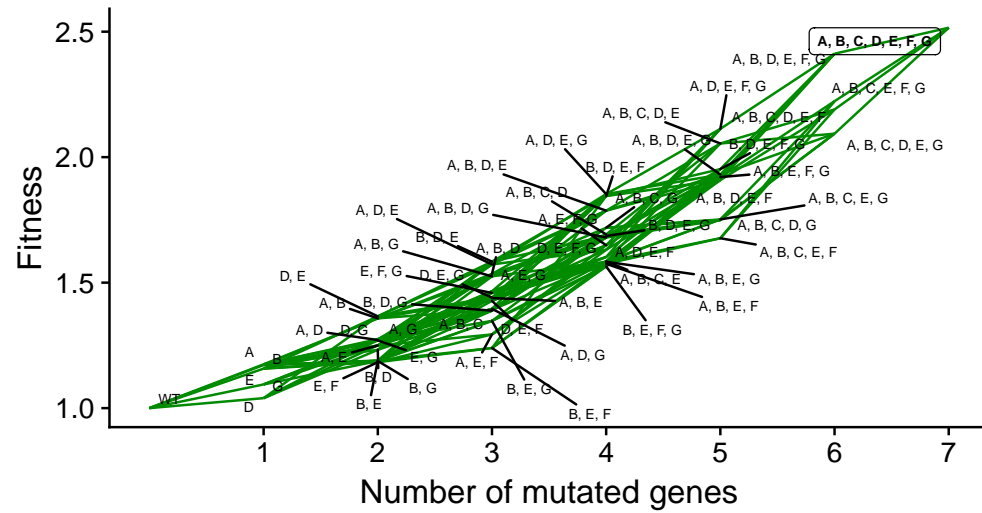

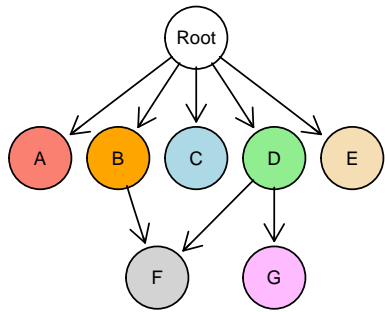

ID **TEOeR5kKW73StsGe**  
 acc genotypes **64**  
 peaks no back 1  
 removed edges 0  
 prop rem edges 0

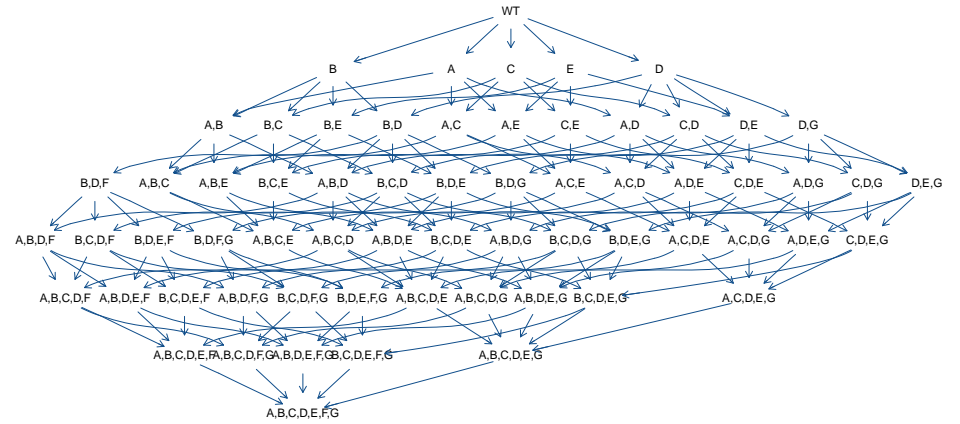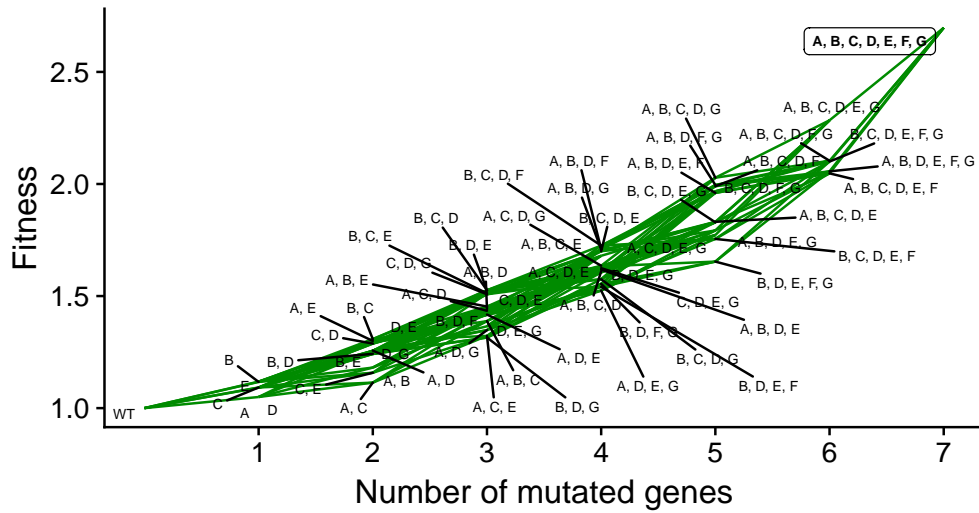



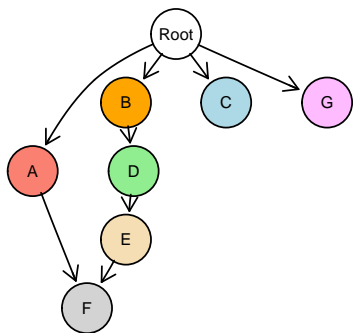

ID tRehYFGQC1cbWhJZ  
 acc genotypes 36  
 peaks no back 1  
 removed edges 0  
 prop rem edges 0

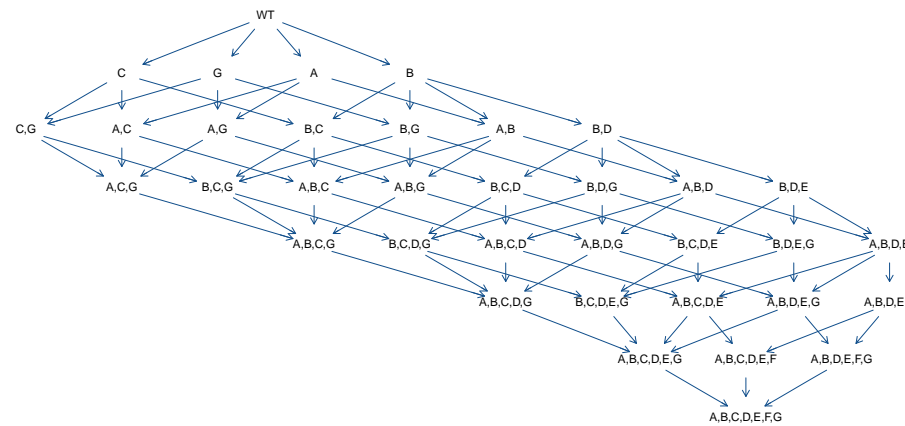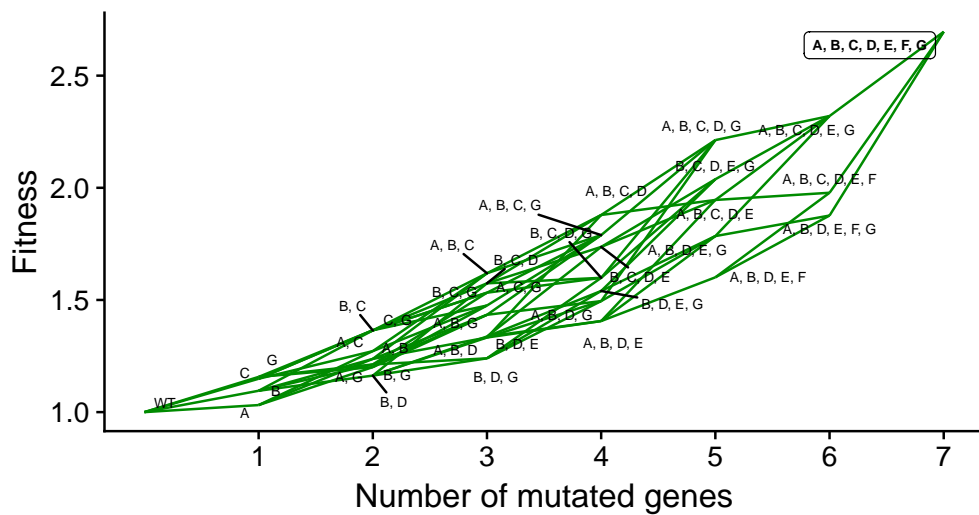



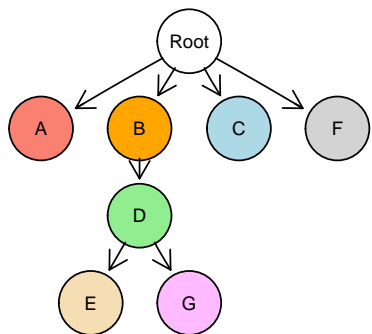

ID TX10VAp1TpO185dpx  
 acc genotypes 48  
 peaks no back 1  
 removed edges 0  
 prop rem edges 0

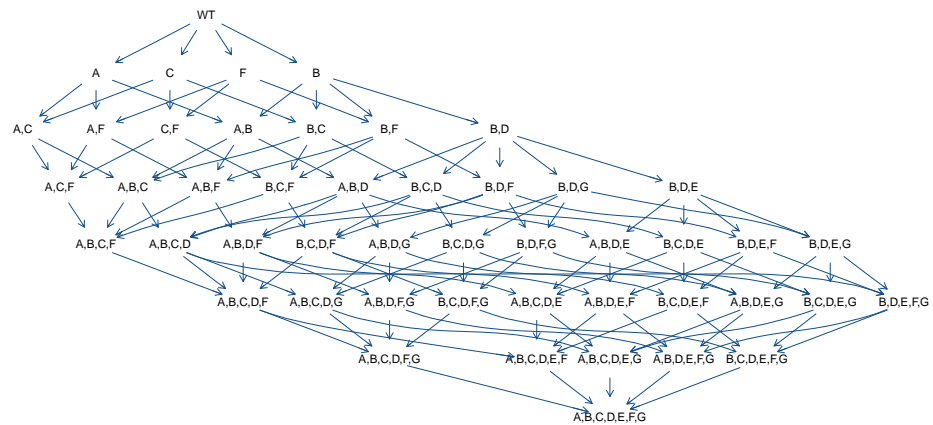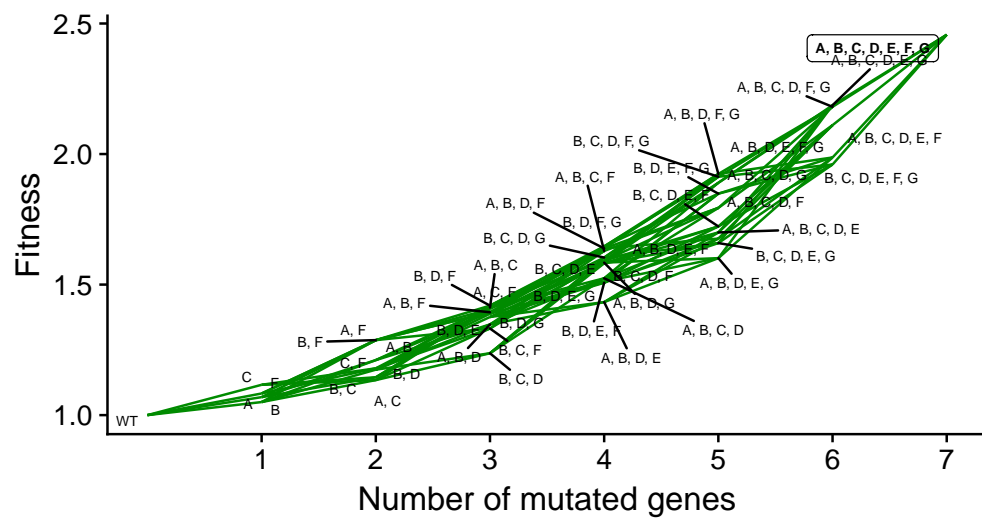

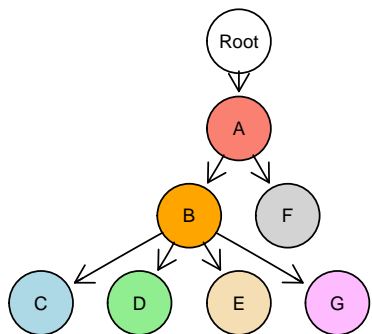

ID [tZE7JJadDSWCdZhf](#)  
 acc genotypes 35  
 peaks no back 1  
 removed edges 0  
 prop rem edges 0

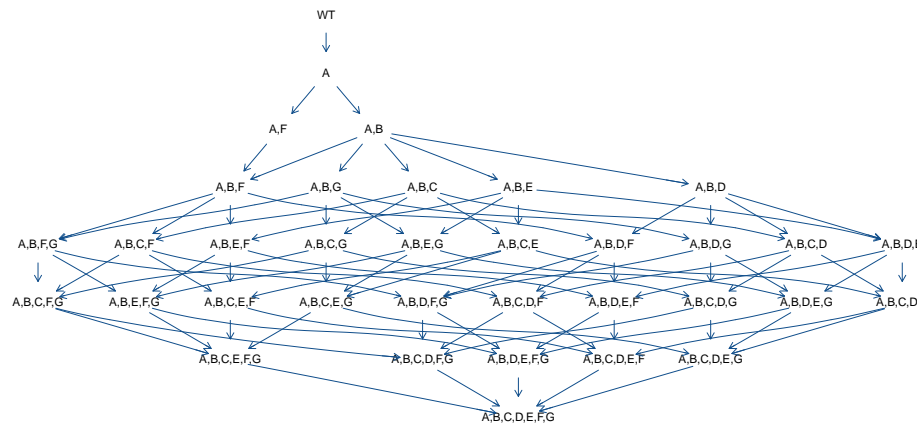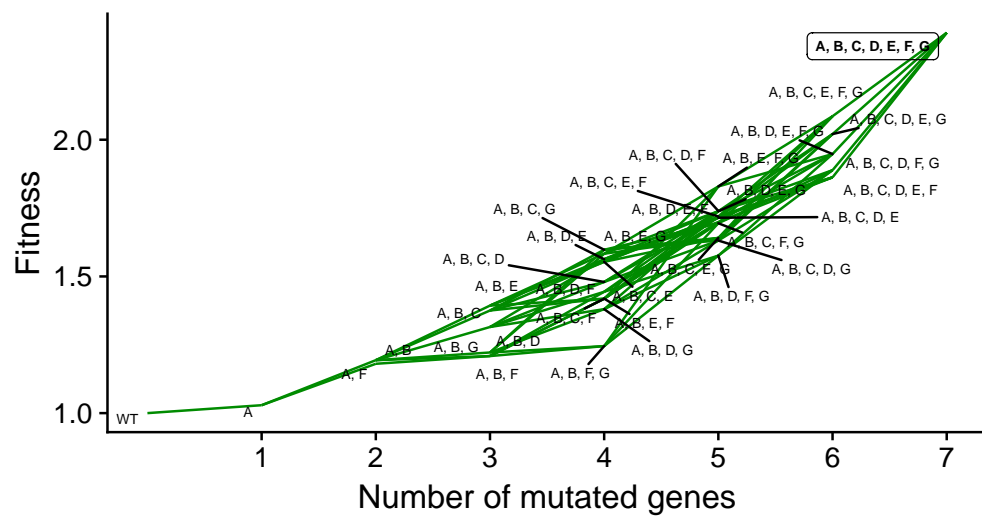

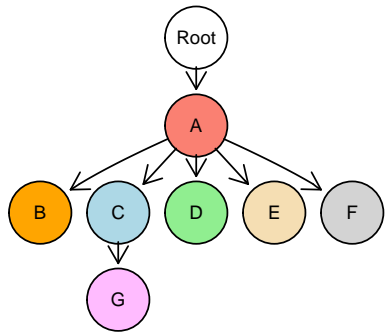

ID **TZvpRpDnbfQvlt4G**  
 acc genotypes **49**  
 peaks no back 1  
 removed edges 0  
 prop rem edges 0

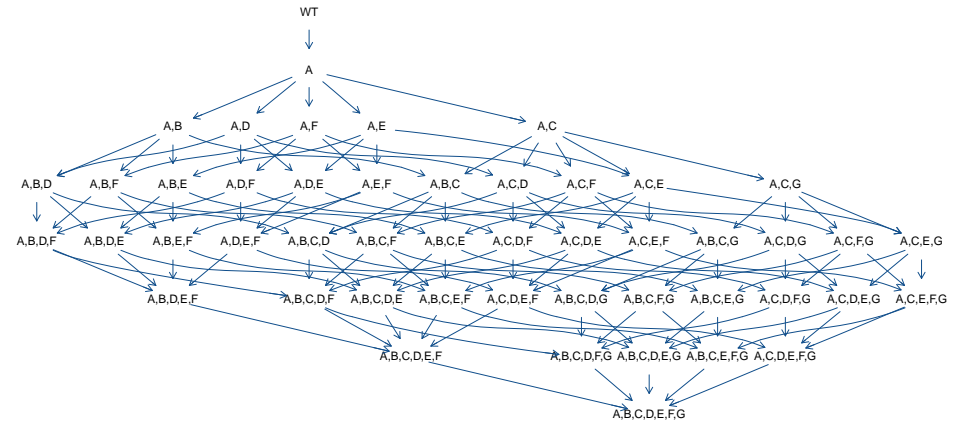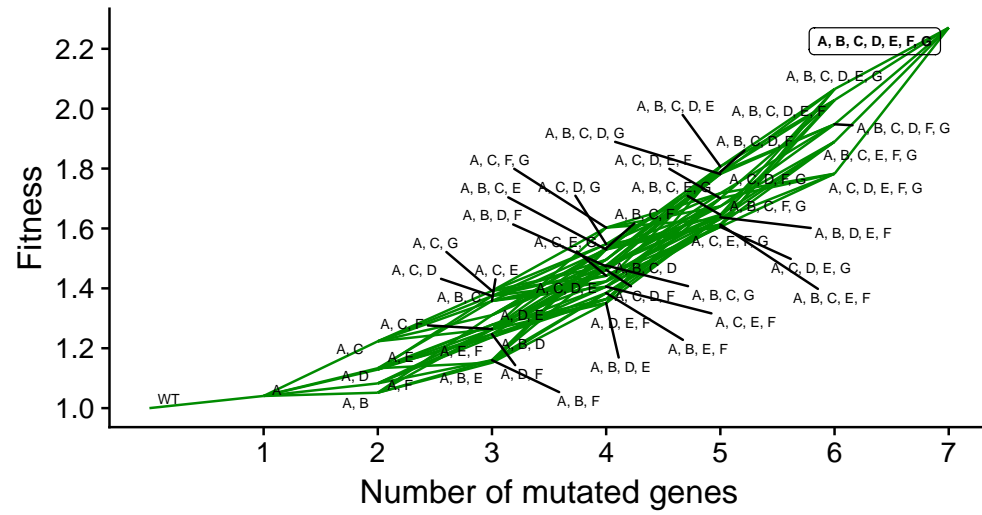

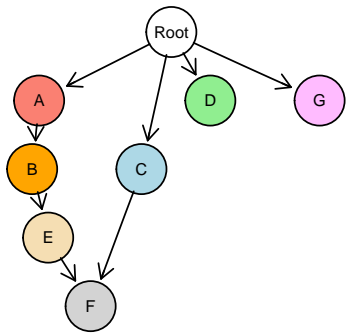

ID **U9FVYqSn82tFhAtI**  
acc genotypes **36**  
peaks no back **1**  
removed edges **0**  
prop rem edges **0**

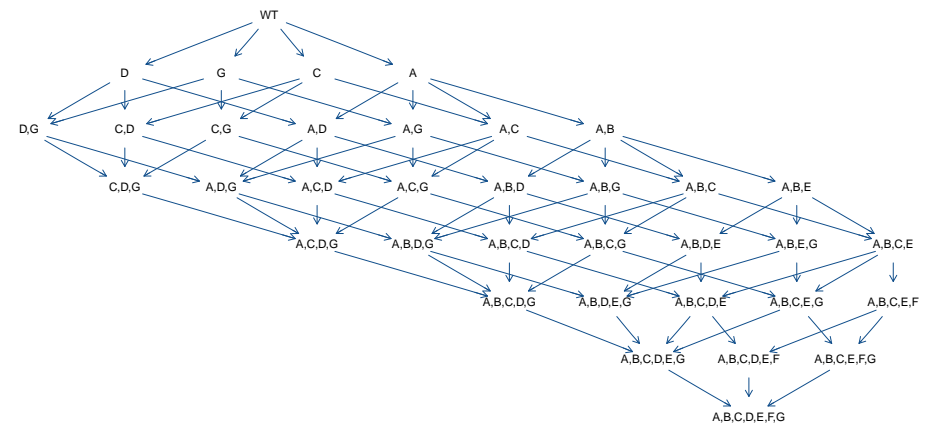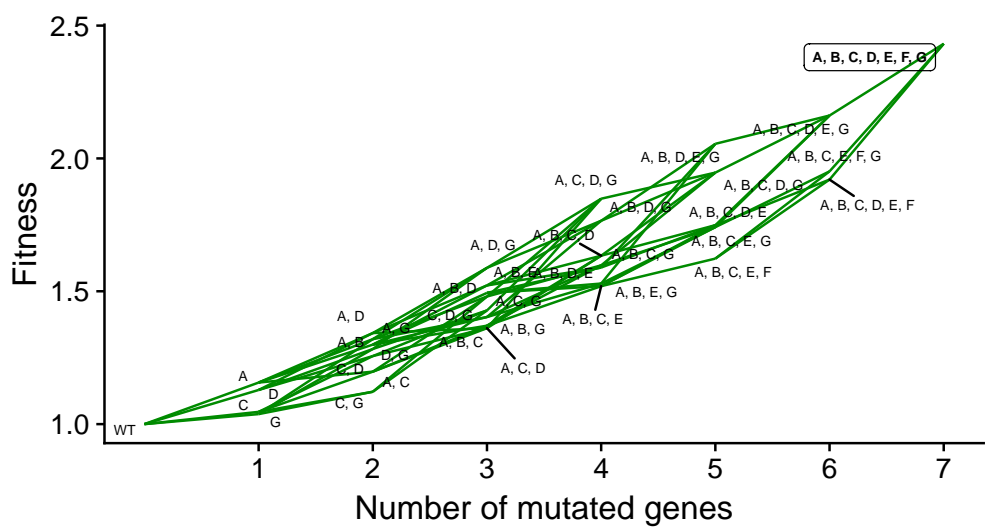

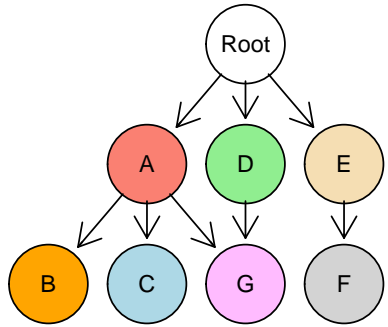

ID **U9tqKXHh1LkO5mF**  
 acc genotypes **42**  
 peaks no back 1  
 removed edges 0  
 prop rem edges 0

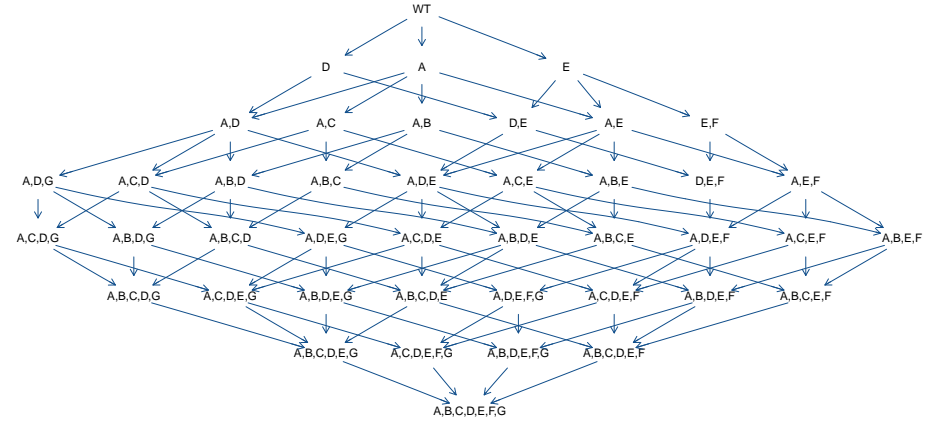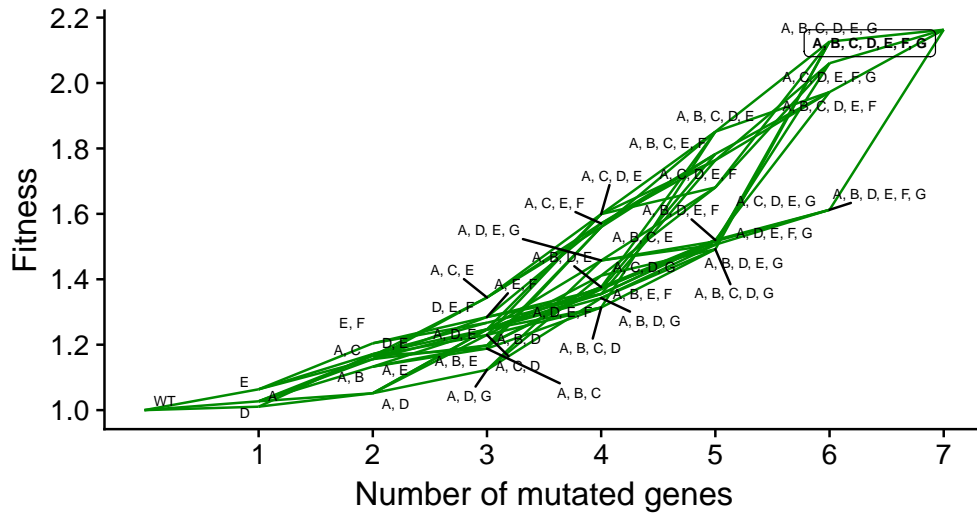



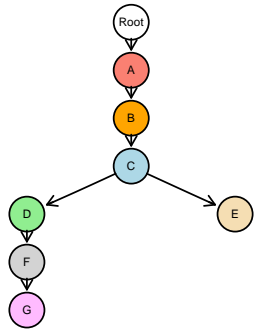

ID **UDkNV5Dxa4w10h6h**  
 acc genotypes **11**  
 peaks no back **1**  
 removed edges **0**  
 prop rem edges **0**

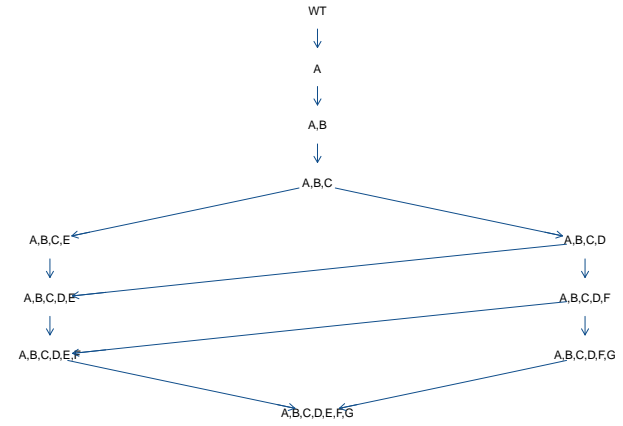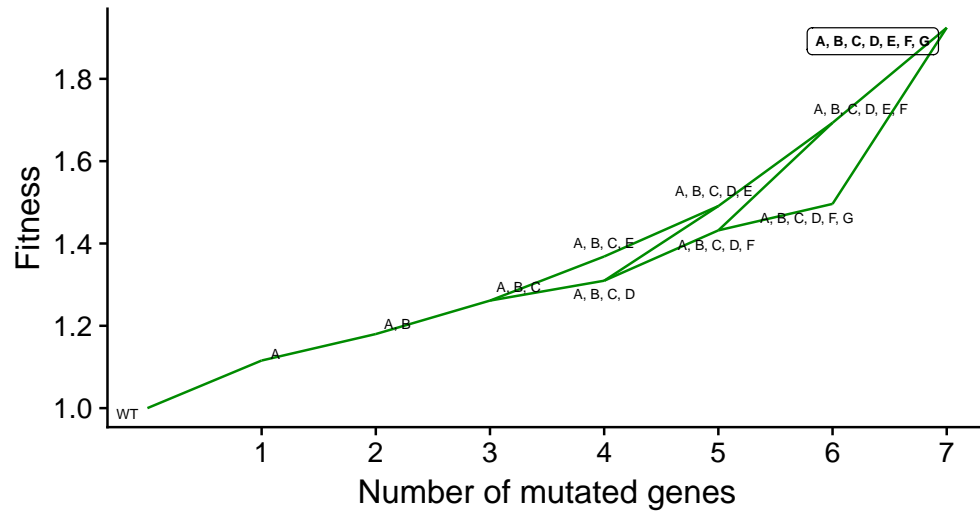

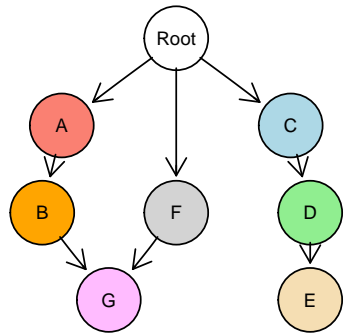

ID **uggvrwXSawaMkYSi**  
 acc genotypes **28**  
 peaks no back 1  
 removed edges 0  
 prop rem edges 0

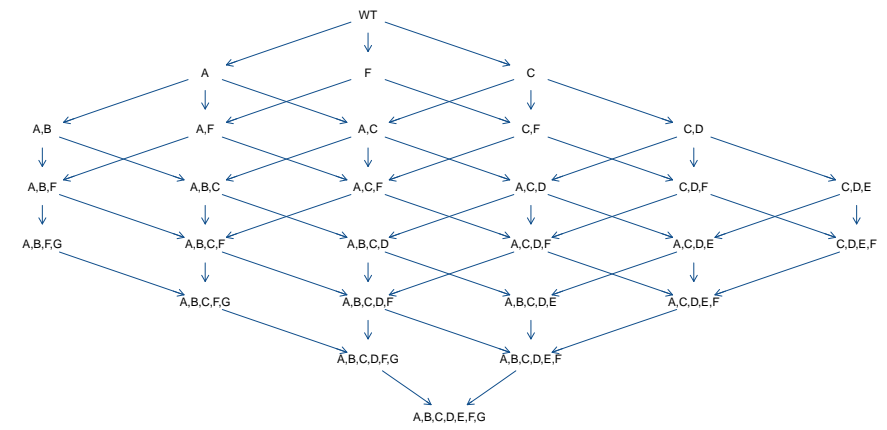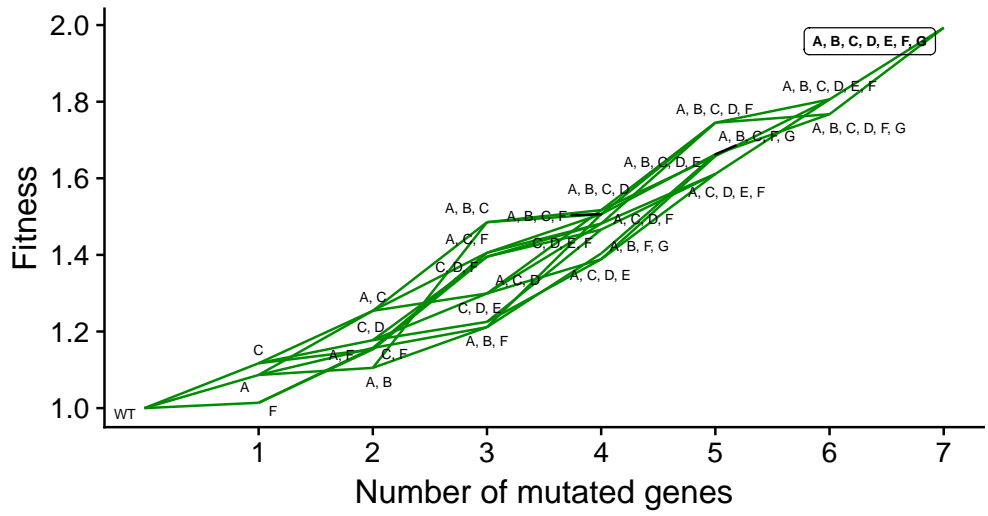



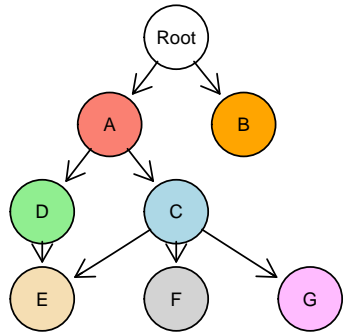

ID [UqGRanXLIQe1z2o](#)  
 acc genotypes 30  
 peaks no back 1  
 removed edges 0  
 prop rem edges 0

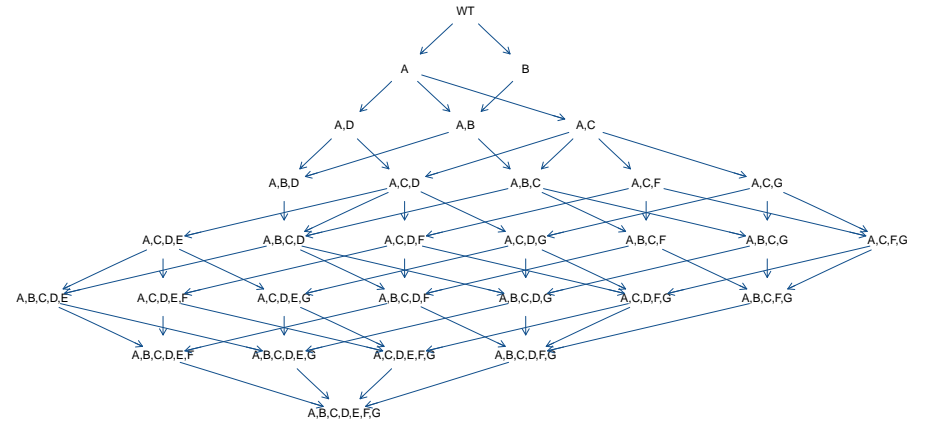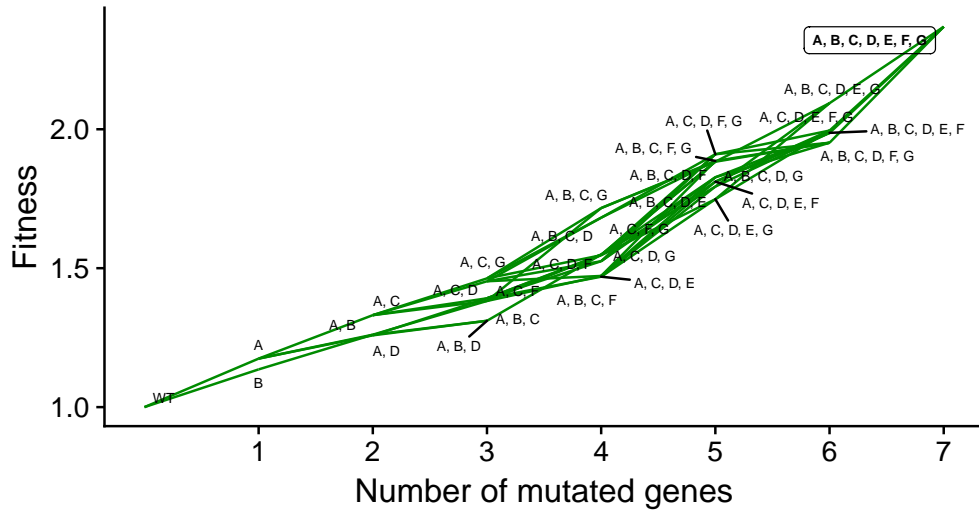

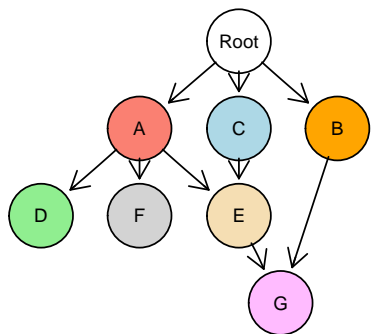

ID uvOx4rGT8Tr6iHvm  
 acc genotypes 32  
 peaks no back 1  
 removed edges 0  
 prop rem edges 0

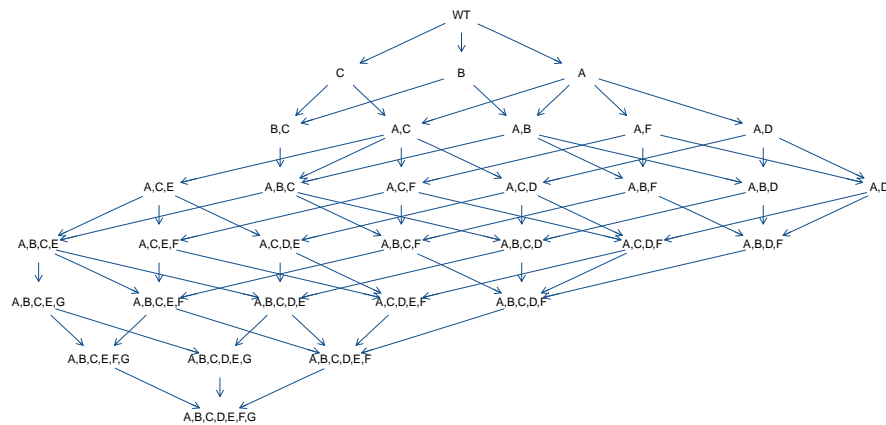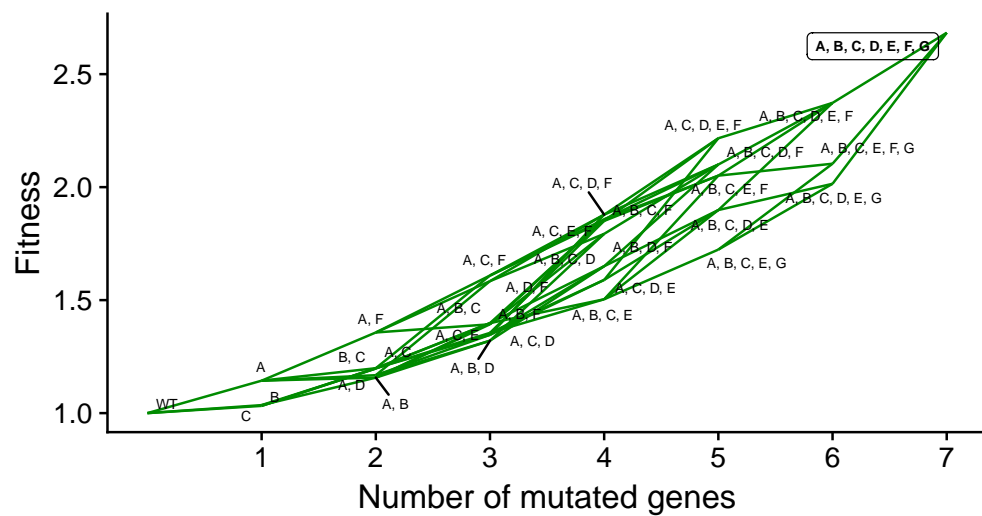

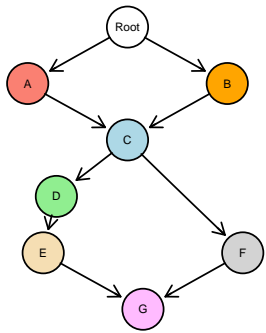

ID **uW1bRozHBgg4IHvp**  
 acc genotypes **11**  
 peaks no back 1  
 removed edges 0  
 prop rem edges 0

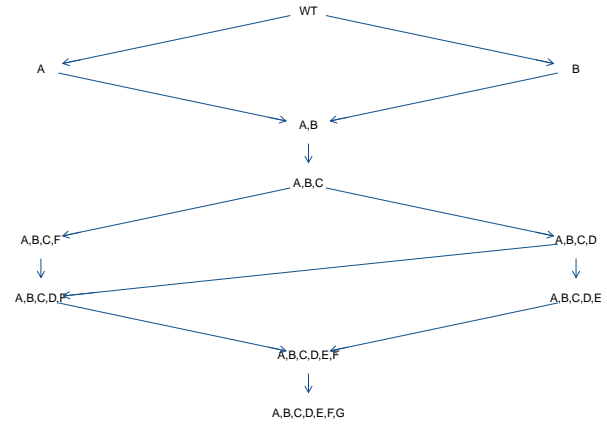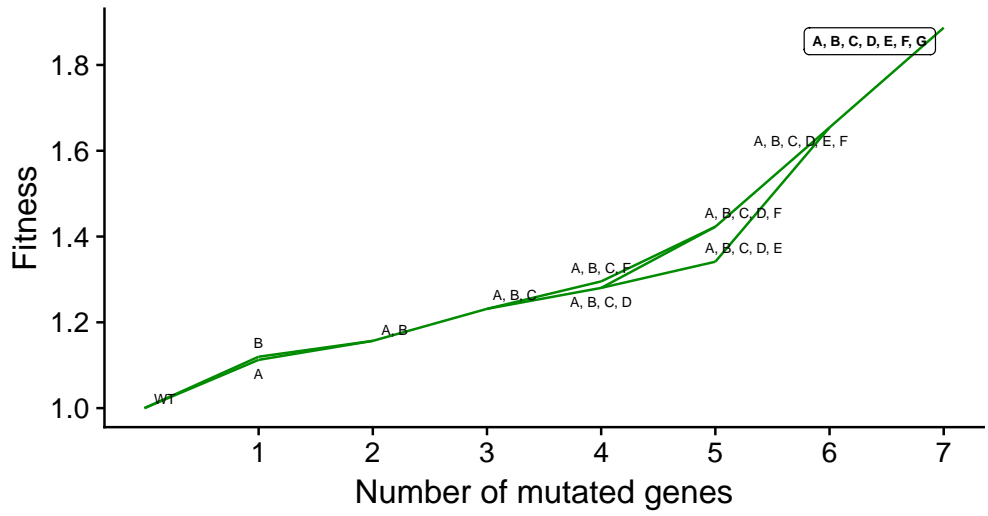

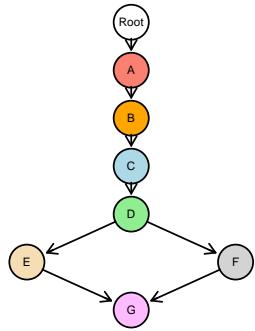

ID [uXxo7pBZAoc10w5w3](#)  
 acc genotypes 9  
 peaks no back 1  
 removed edges 0  
 prop rem edges 0

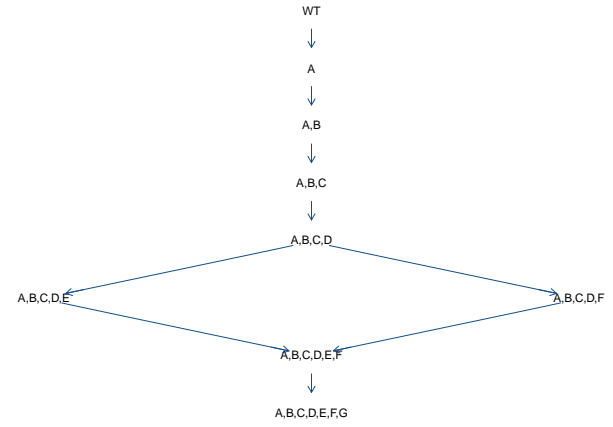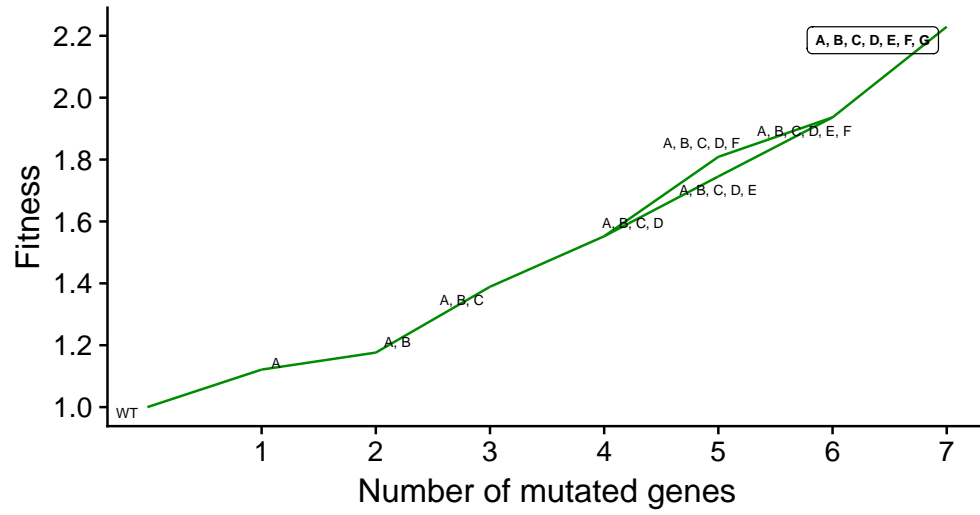

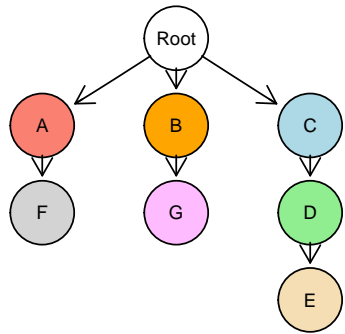

ID **vG10cQRZVOxdasUPn**  
 acc genotypes **36**  
 peaks no back **1**  
 removed edges **0**  
 prop rem edges **0**

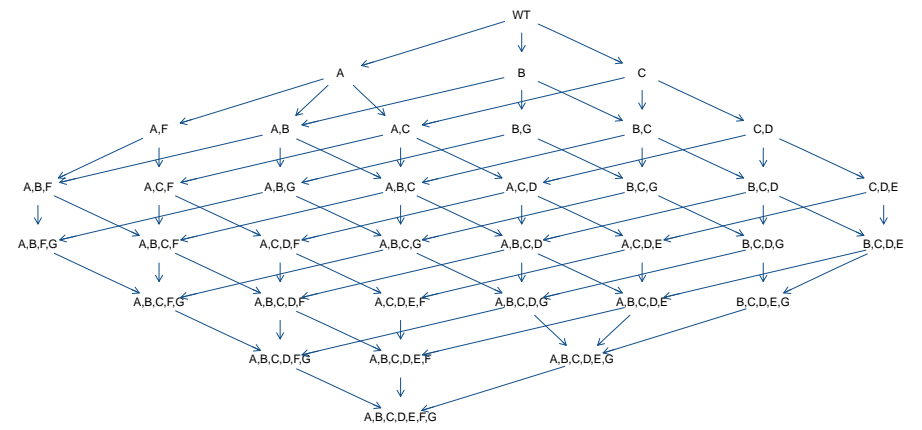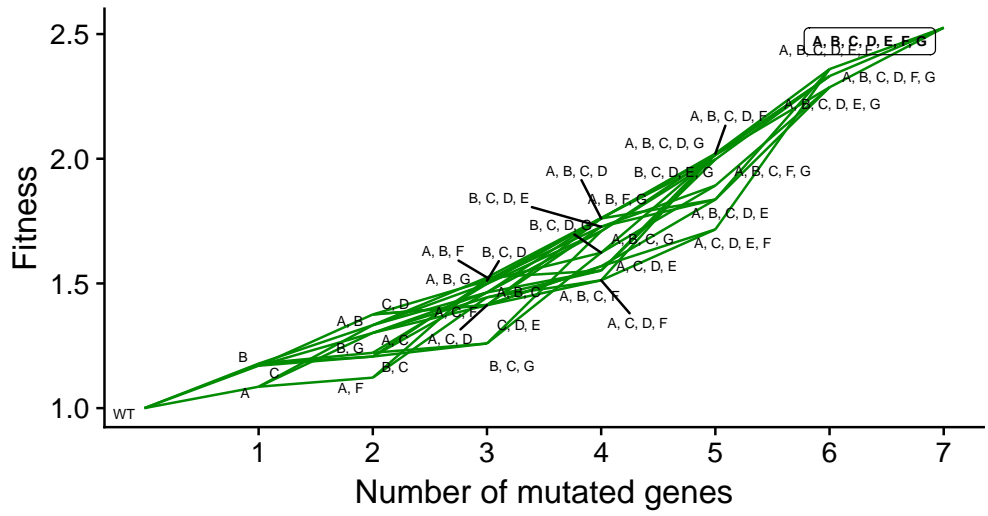

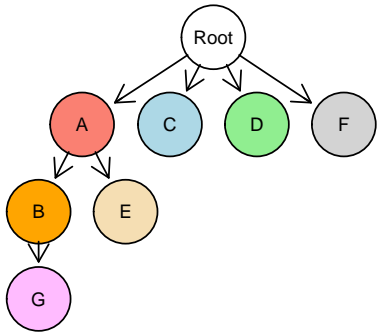

ID **vpP1t7lvrEU3dpj1**  
 acc genotypes **56**  
 peaks no back 1  
 removed edges 0  
 prop rem edges 0

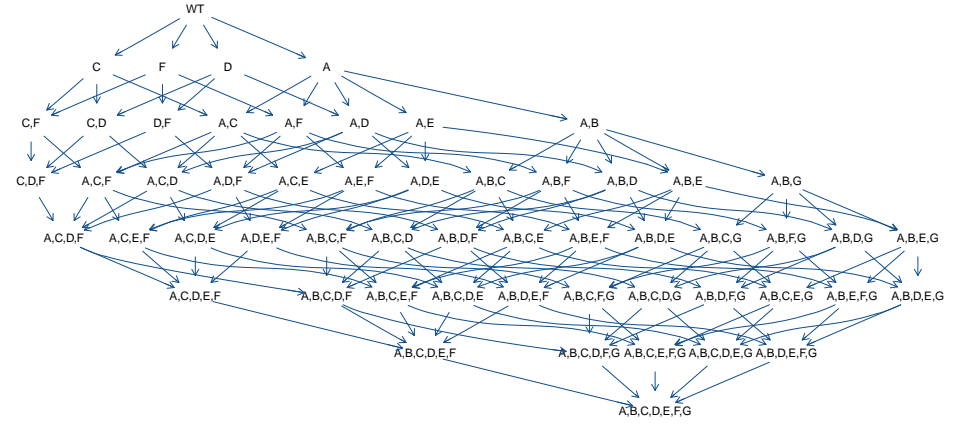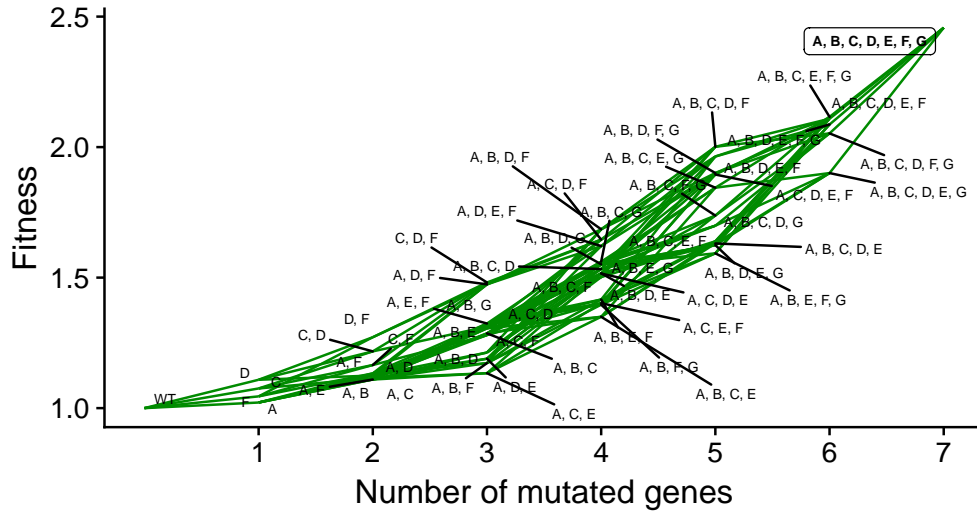

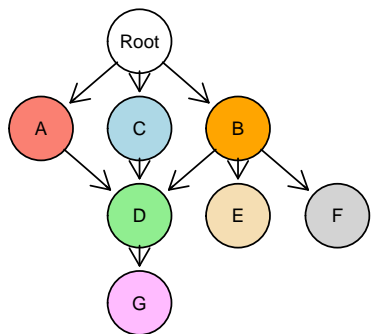

ID **vq10rX5oSabdGhDLE**  
 acc genotypes **28**  
 peaks no back 1  
 removed edges 0  
 prop rem edges 0

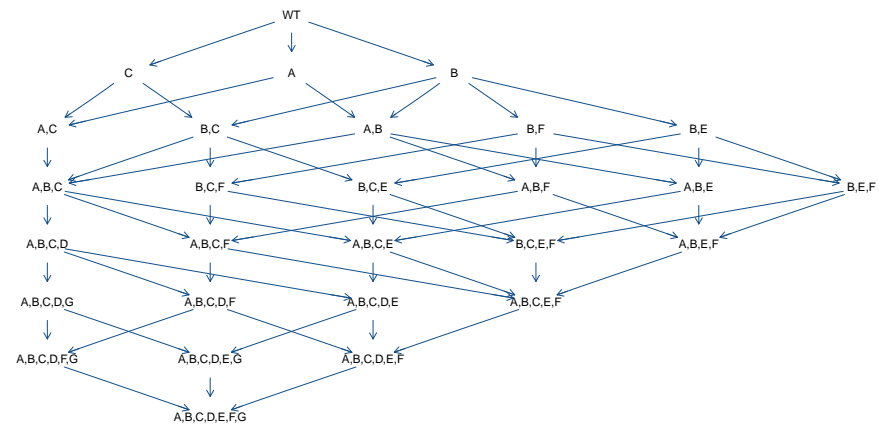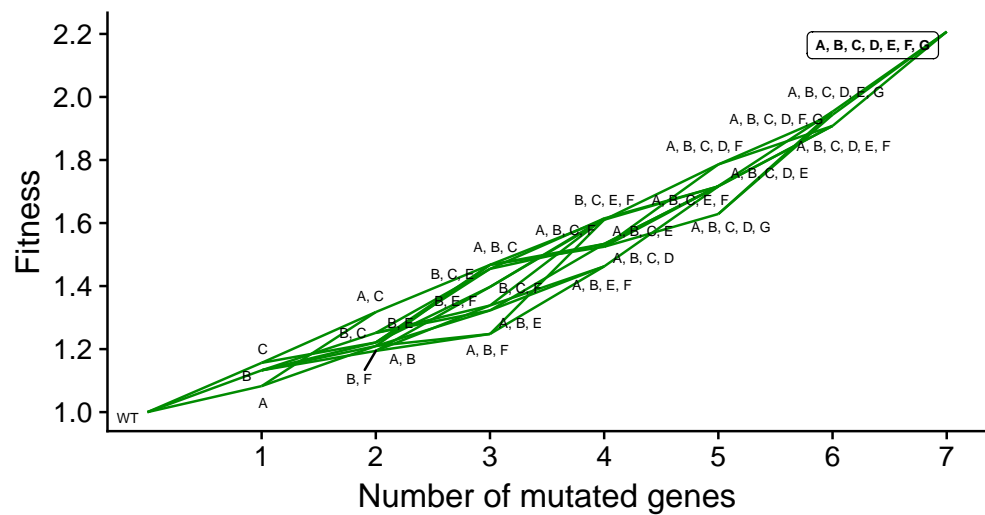

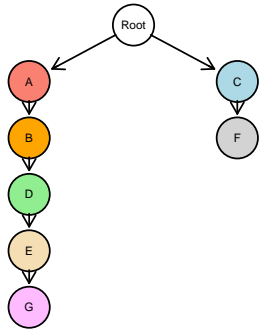

ID [vrlakeKZSaVC1Lzx](#)  
 acc genotypes 18  
 peaks no back 1  
 removed edges 0  
 prop rem edges 0

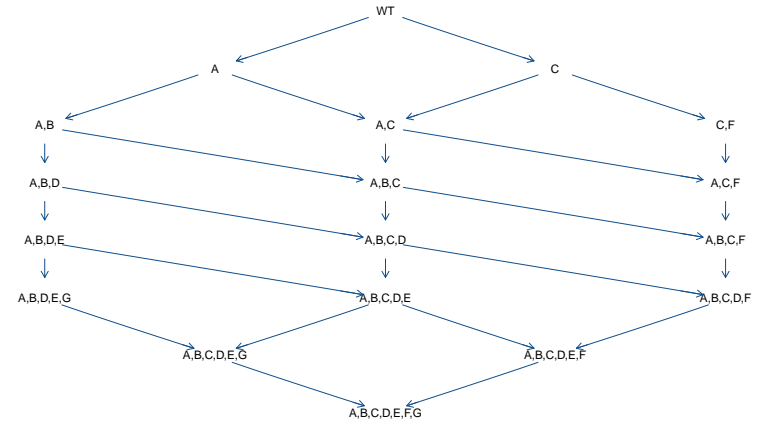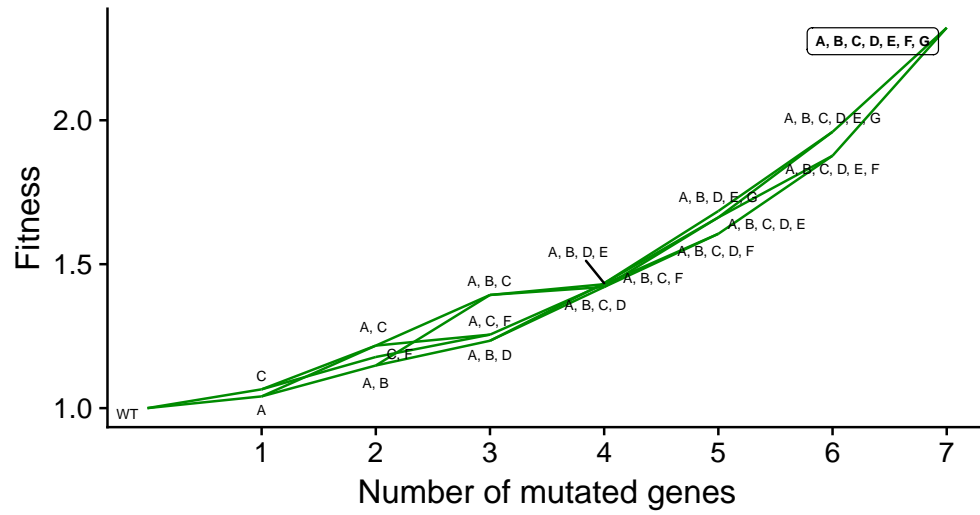



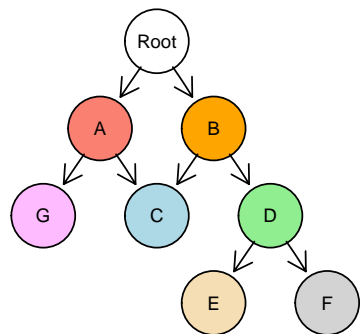

ID **VYbhtDvalyAvnLsQ**  
 acc genotypes **28**  
 peaks no back 1  
 removed edges 0  
 prop rem edges 0

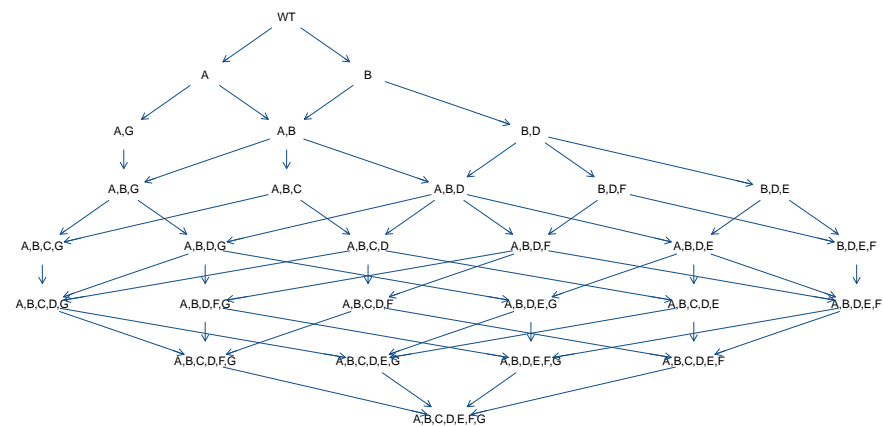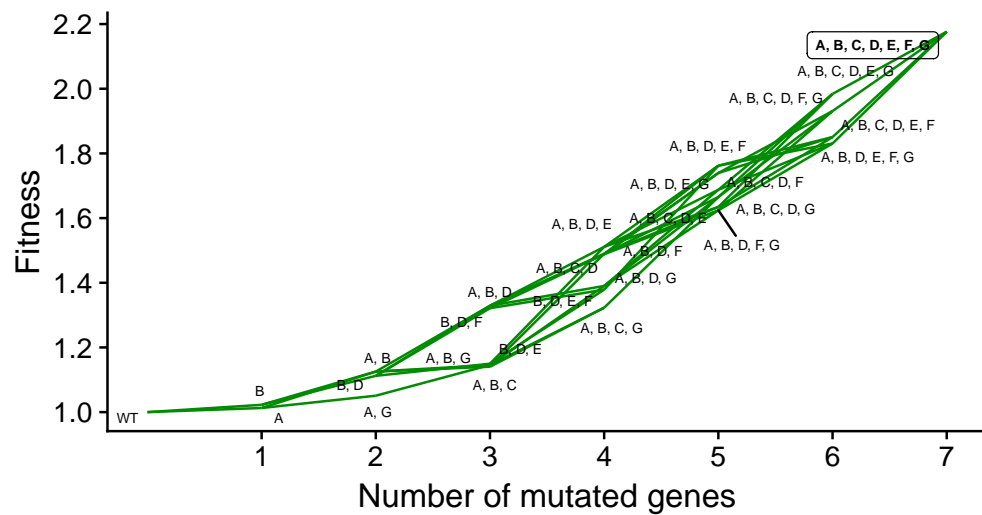

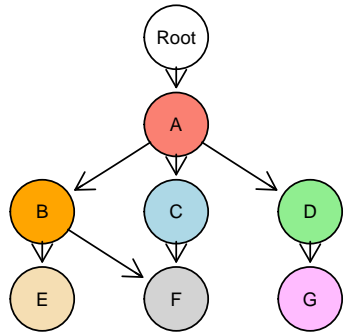

ID **Wc5FDMqc5Bb6oeDH**  
 acc genotypes **25**  
 peaks no back 1  
 removed edges 0  
 prop rem edges 0

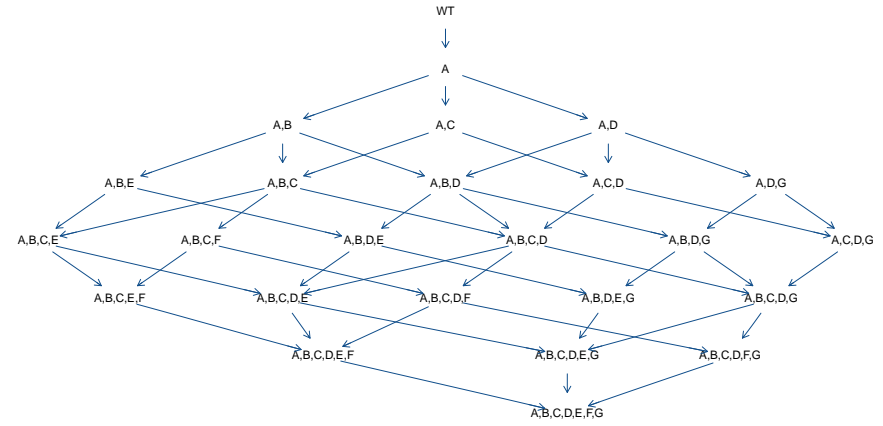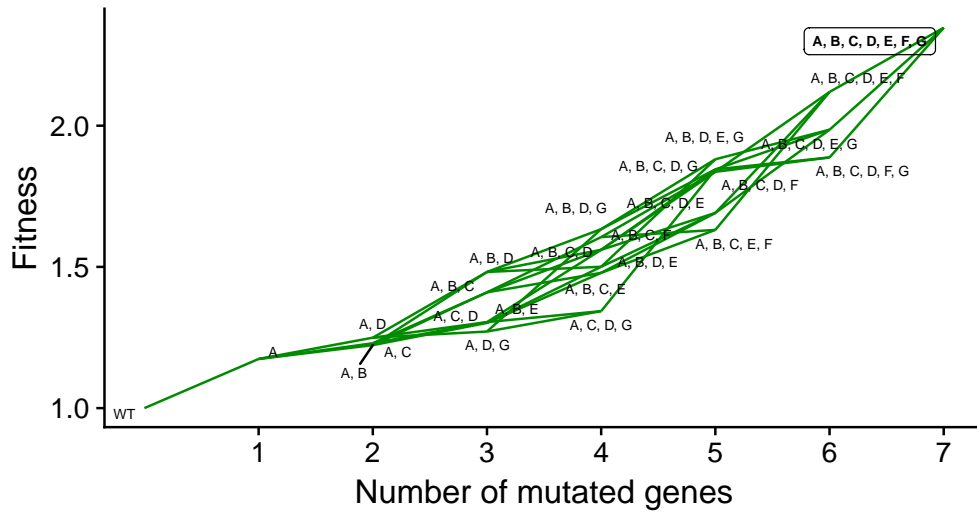

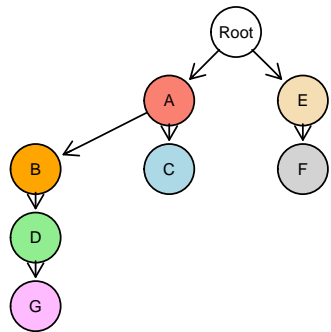

ID **Wh8iukl5tW3rKboV**  
 acc genotypes **27**  
 peaks no back 1  
 removed edges 0  
 prop rem edges 0

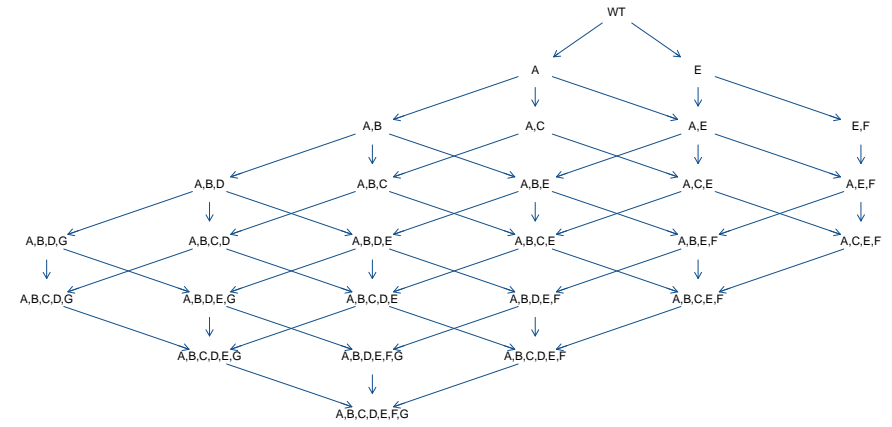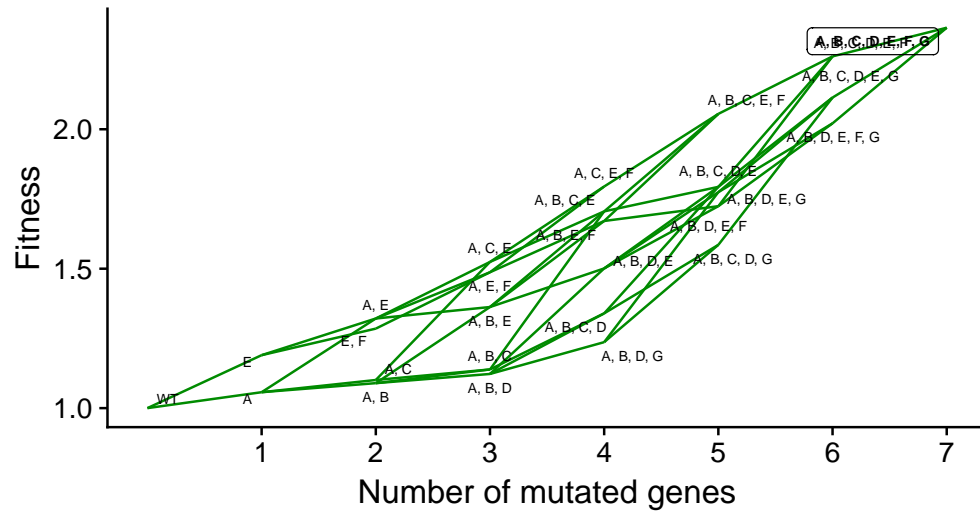

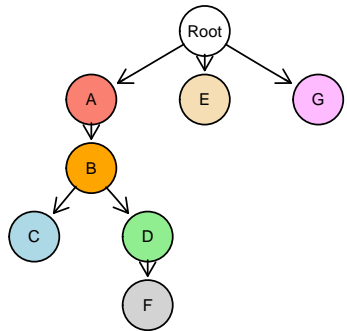

ID **wKEITkPsWorldlcX**  
 acc genotypes **32**  
 peaks no back **1**  
 removed edges **0**  
 prop rem edges **0**

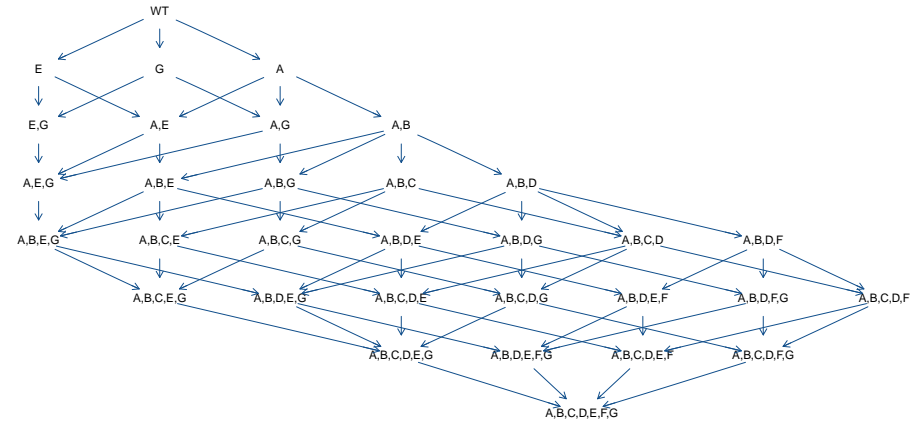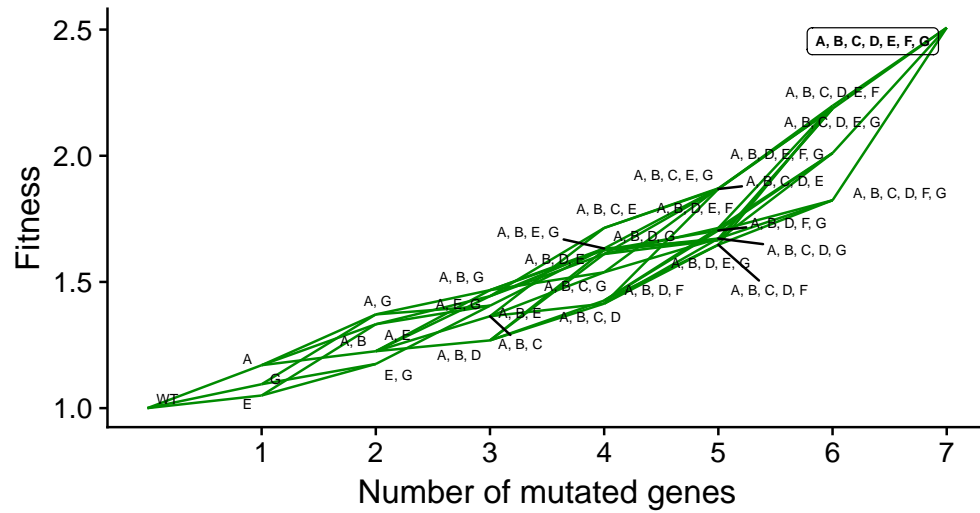

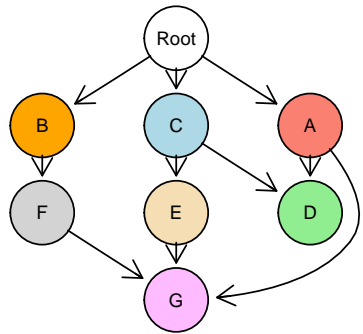

ID **wLlgb17DLATLHcdE**  
 acc genotypes **26**  
 peaks no back 1  
 removed edges 0  
 prop rem edges 0

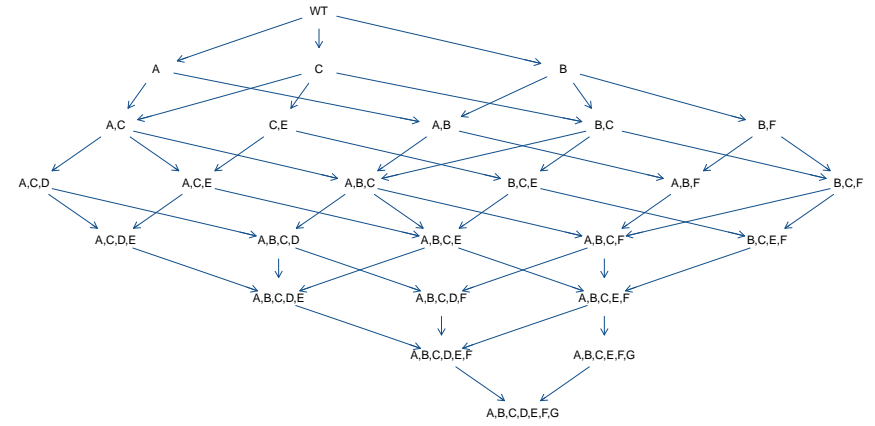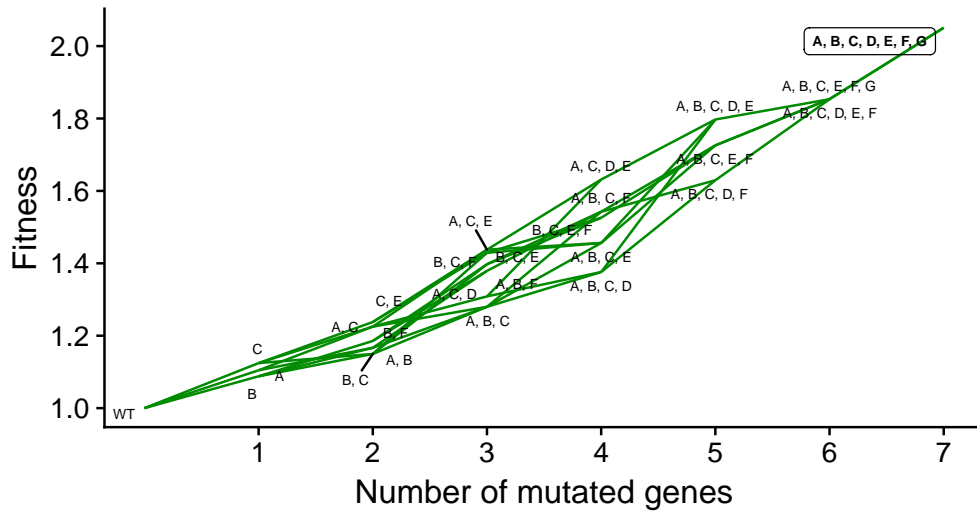

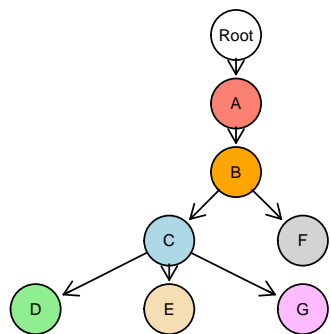

ID **wNAatqIHqMbivMb**  
 acc genotypes **20**  
 peaks no back **1**  
 removed edges **0**  
 prop rem edges **0**

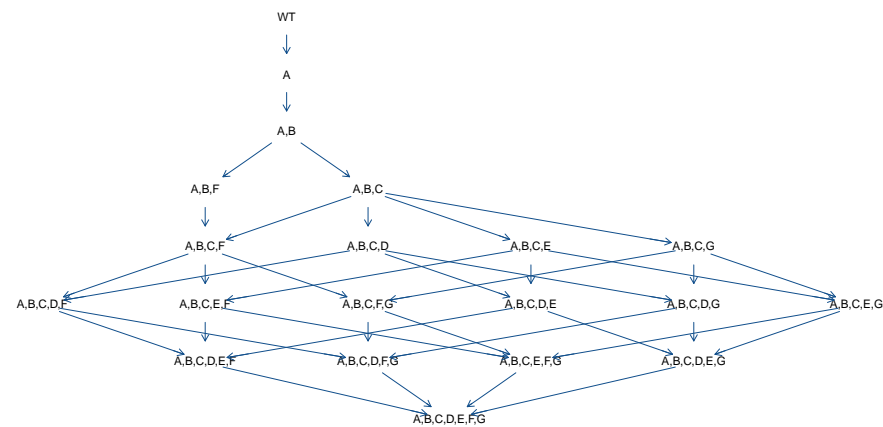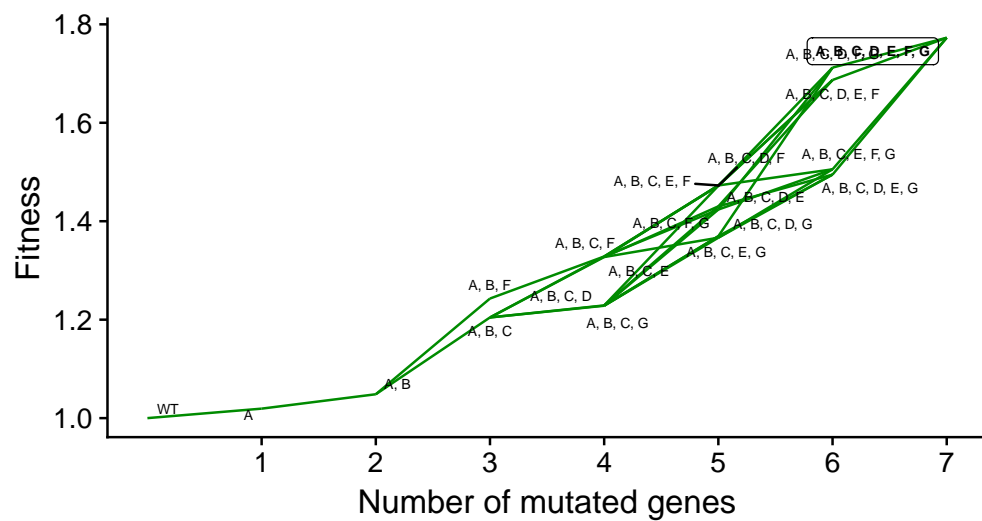

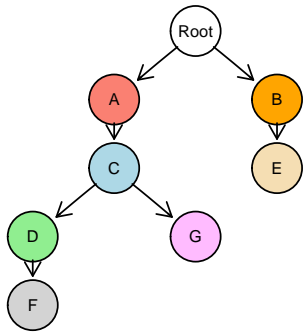

ID **Wo7CkQUAYwflkx4**  
 acc genotypes **24**  
 peaks no back 1  
 removed edges 0  
 prop rem edges 0

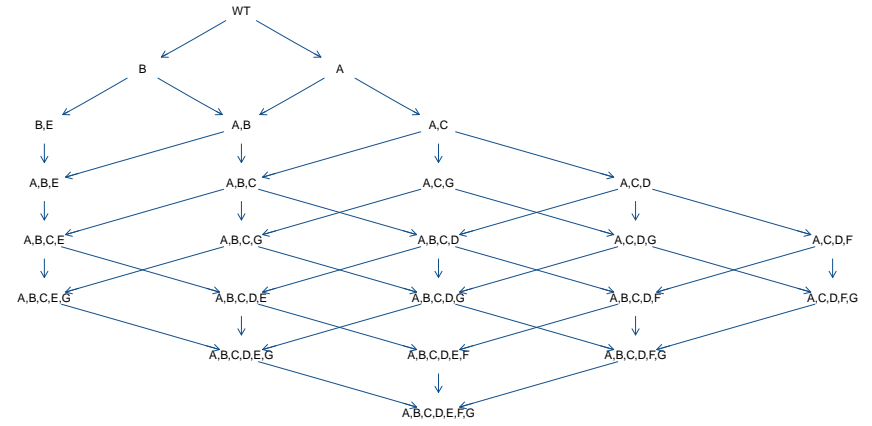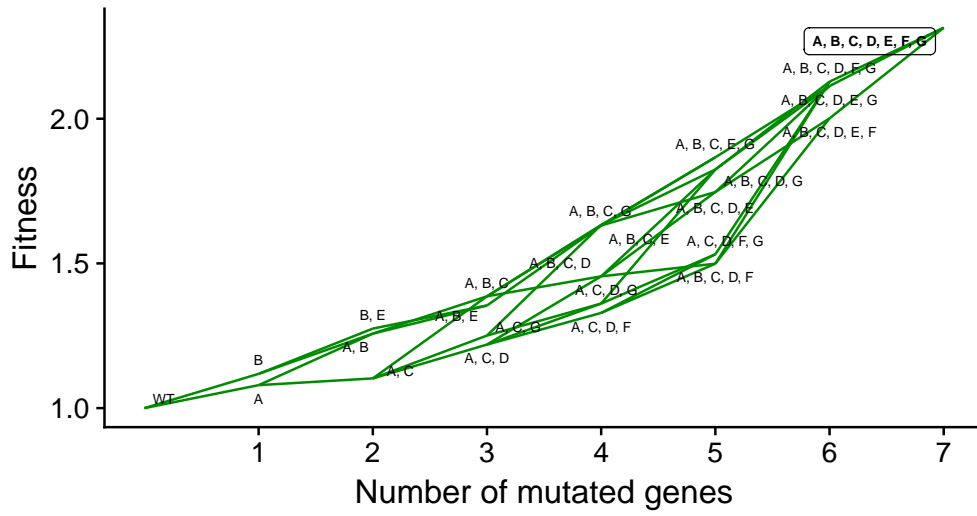

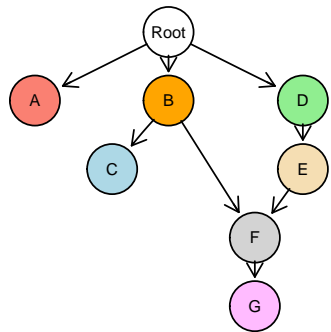

ID [WoqyN8oF47jbnoBK](#)  
 acc genotypes 26  
 peaks no back 1  
 removed edges 0  
 prop rem edges 0

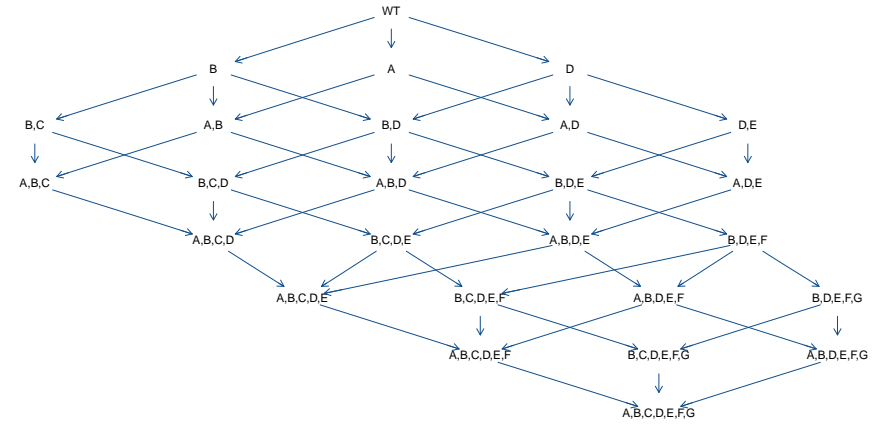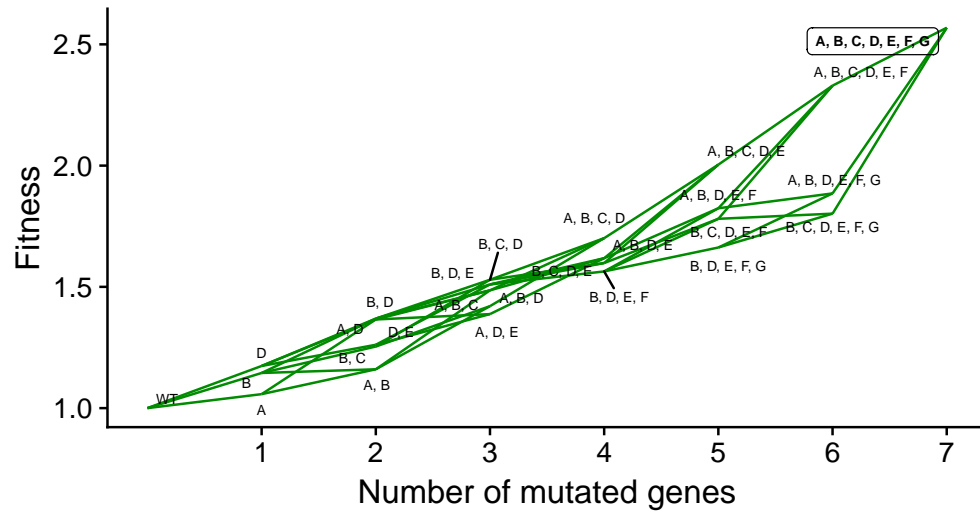



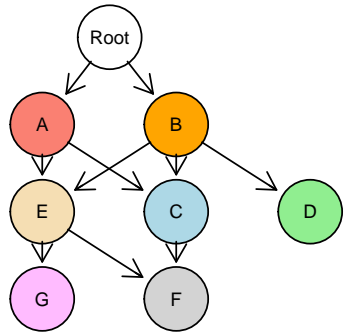

ID WQ5ixaPdtGNgofTu  
 acc genotypes 20  
 peaks no back 1  
 removed edges 0  
 prop rem edges 0

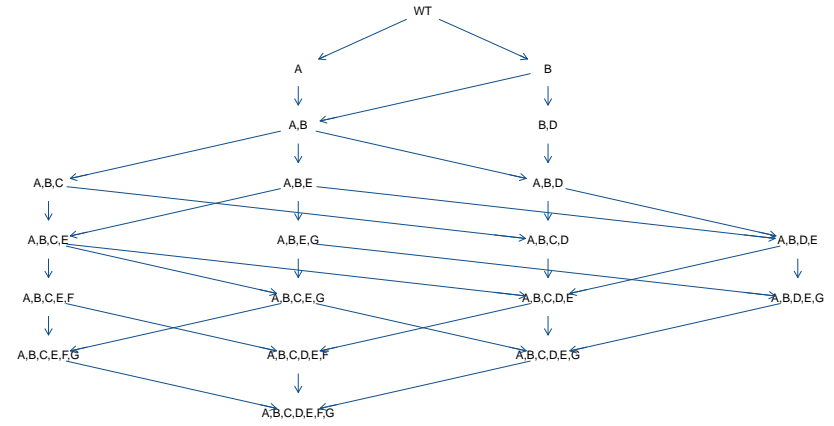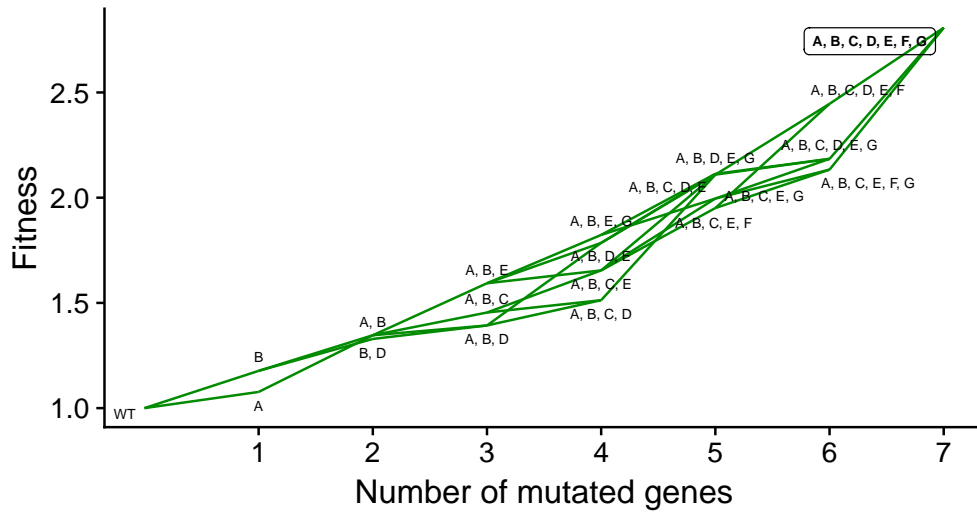

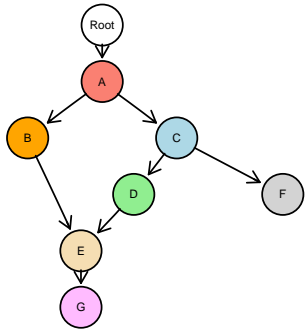

ID **wrcr1dFF7SQNSwts**  
 acc genotypes **15**  
 peaks no back 1  
 removed edges 0  
 prop rem edges 0

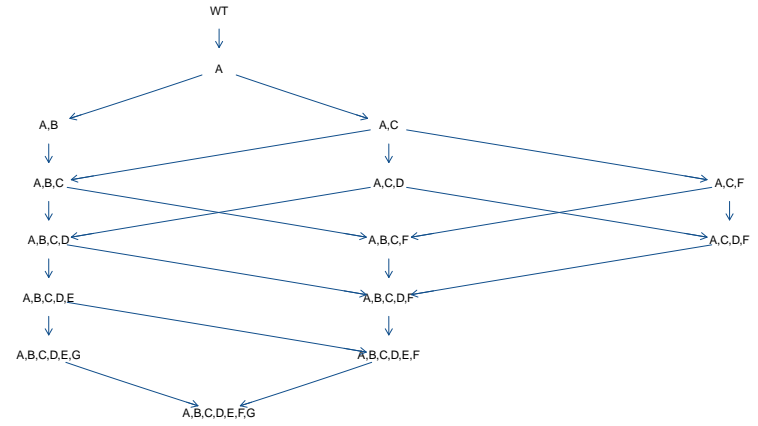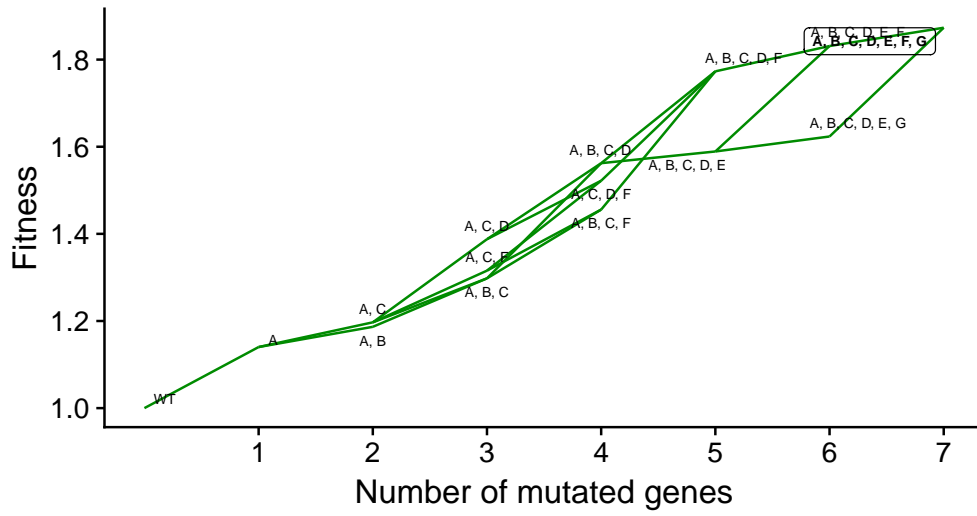

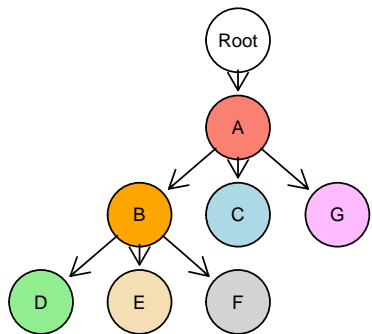

ID **wrRTzMwK5mQOC85K**  
 acc genotypes **37**  
 peaks no back **1**  
 removed edges **0**  
 prop rem edges **0**

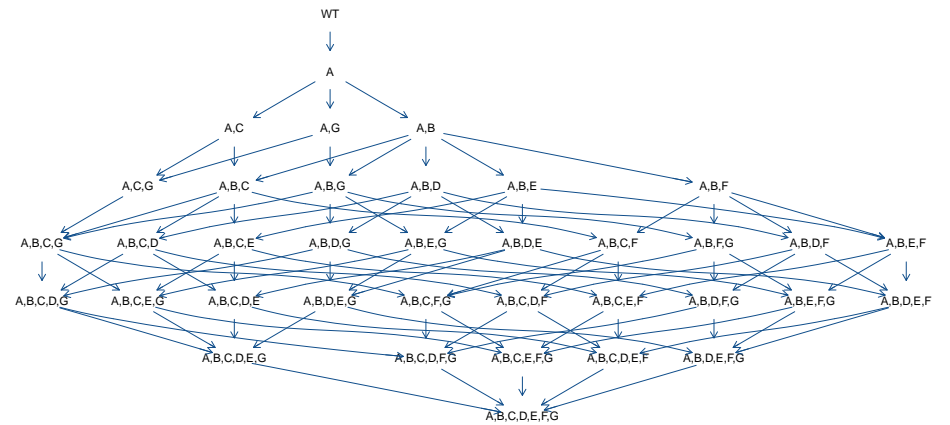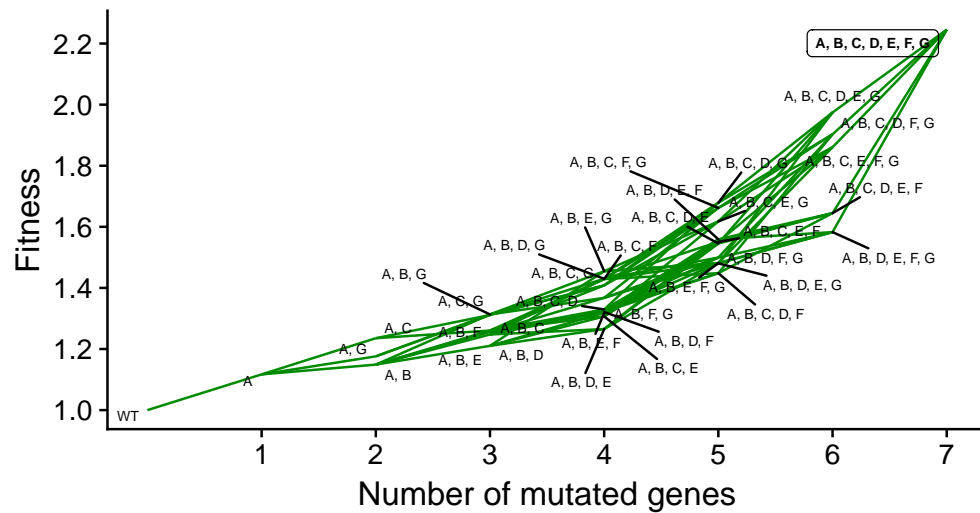

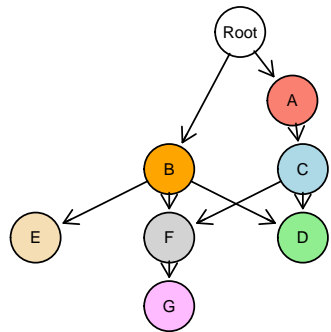

ID WTWhv3VrTVwsxPNF  
 acc genotypes 19  
 peaks no back 1  
 removed edges 0  
 prop rem edges 0

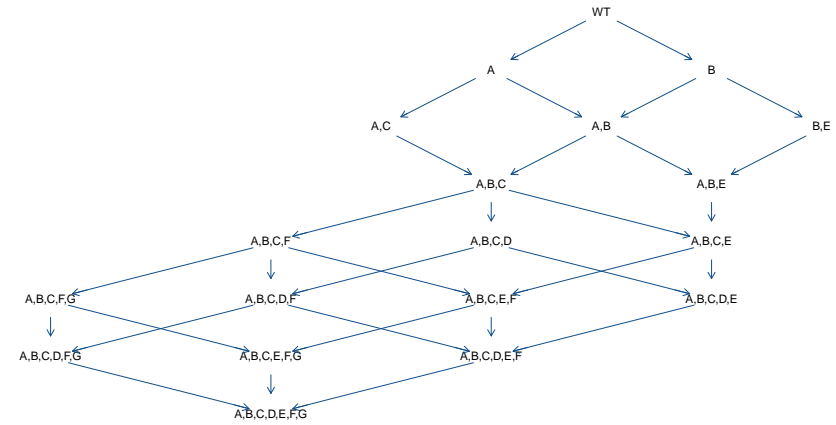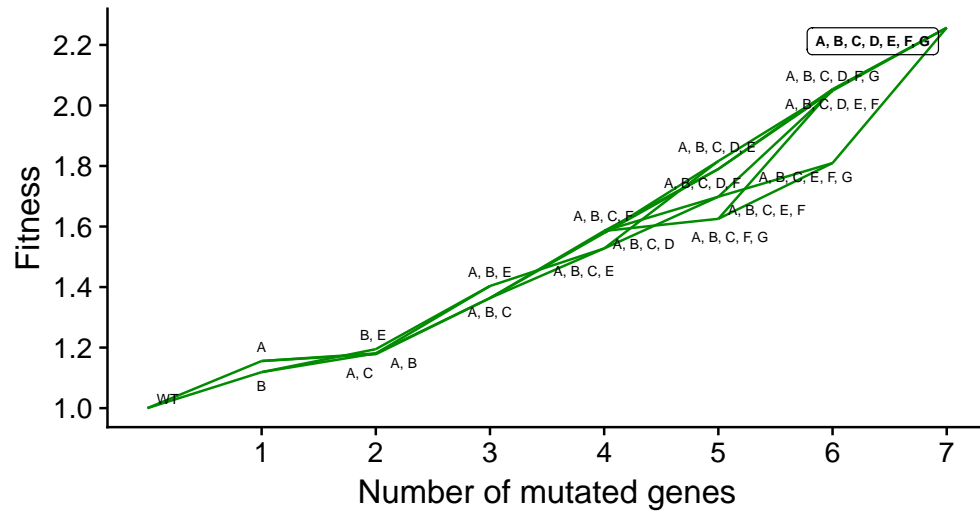

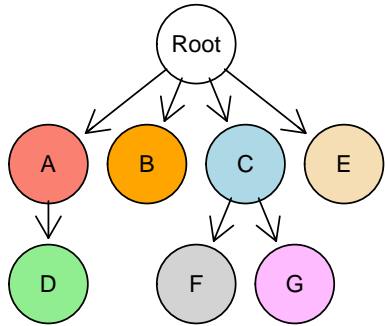

ID **wu54FEWu694xA1Ko**  
 acc genotypes **60**  
 peaks no back 1  
 removed edges 0  
 prop rem edges 0

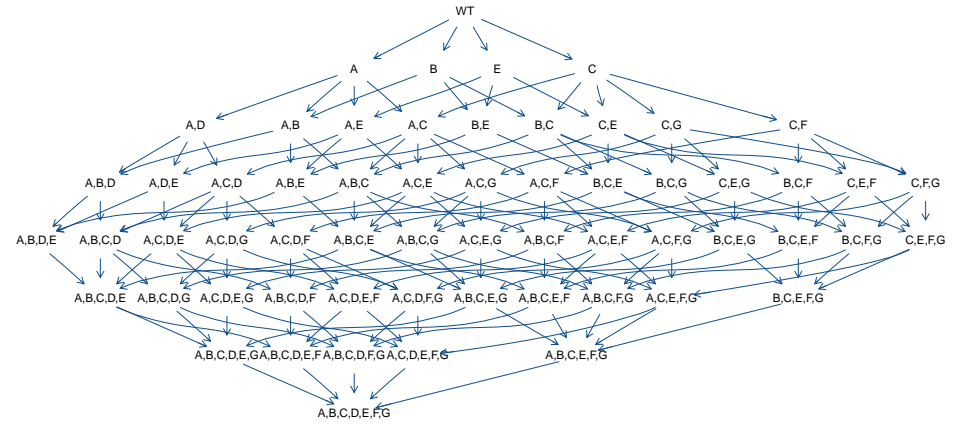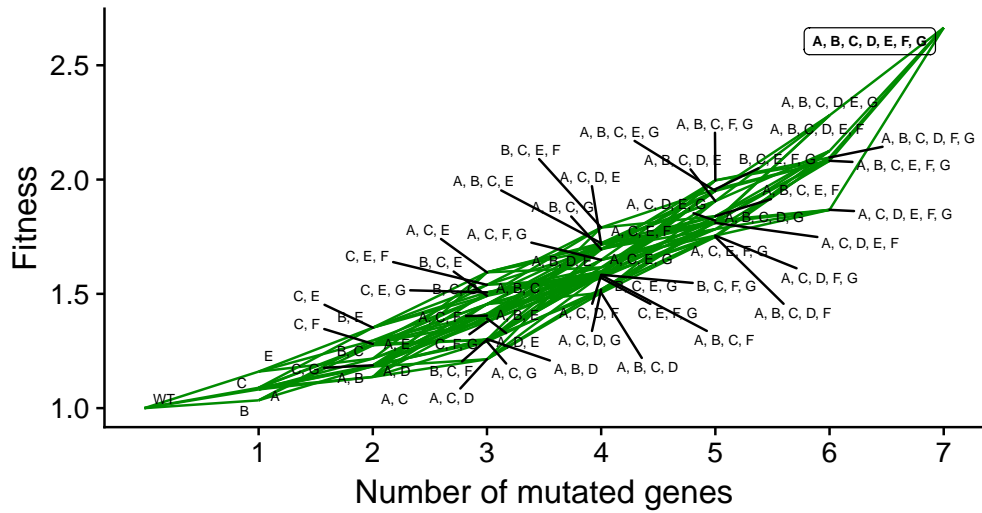

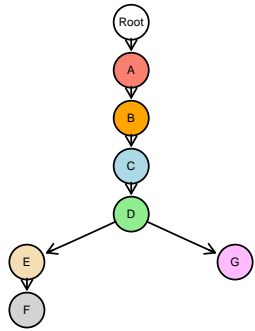

ID wXqQ210QBkvlJzh1K  
 acc genotypes 10  
 peaks no back 1  
 removed edges 0  
 prop rem edges 0

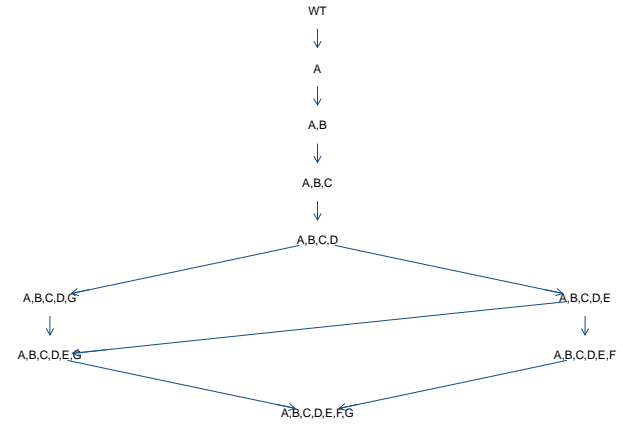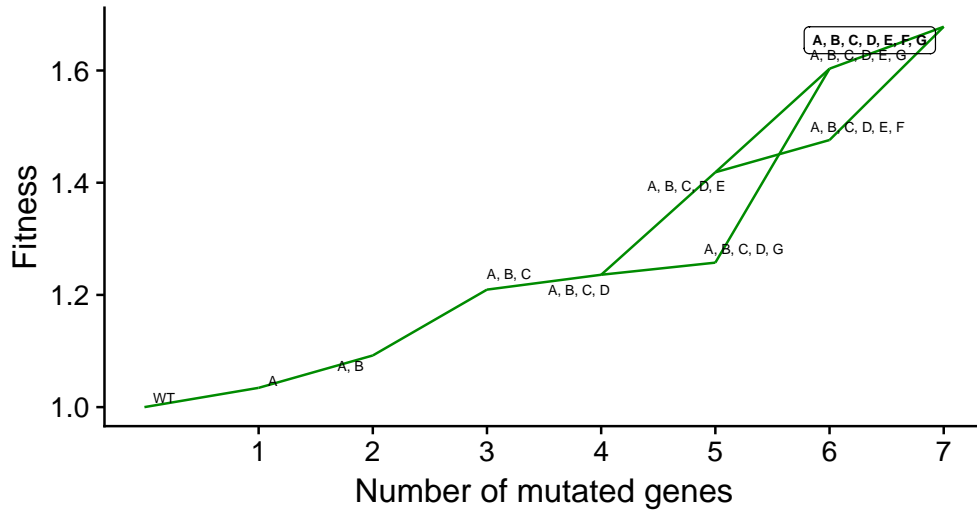

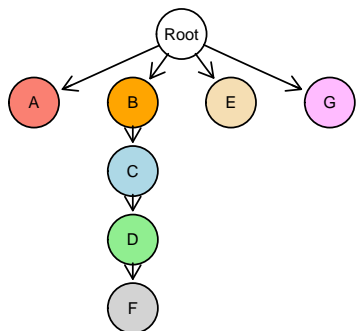

ID **WzFbSKNFewLZM2Lc**  
 acc genotypes **40**  
 peaks no back 1  
 removed edges 0  
 prop rem edges 0

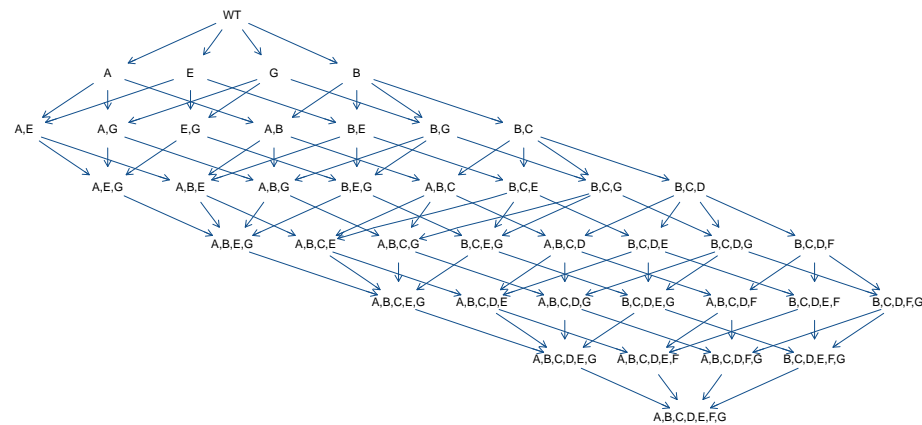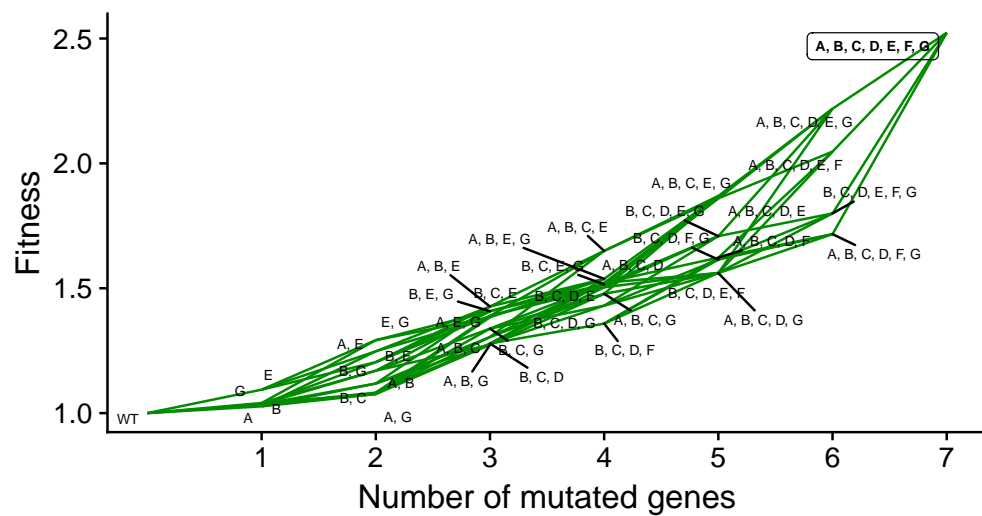

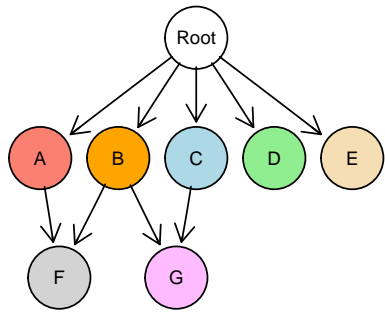

ID **wZHRIWE1jjVBM1mQ**  
 acc genotypes **52**  
 peaks no back 1  
 removed edges 0  
 prop rem edges 0

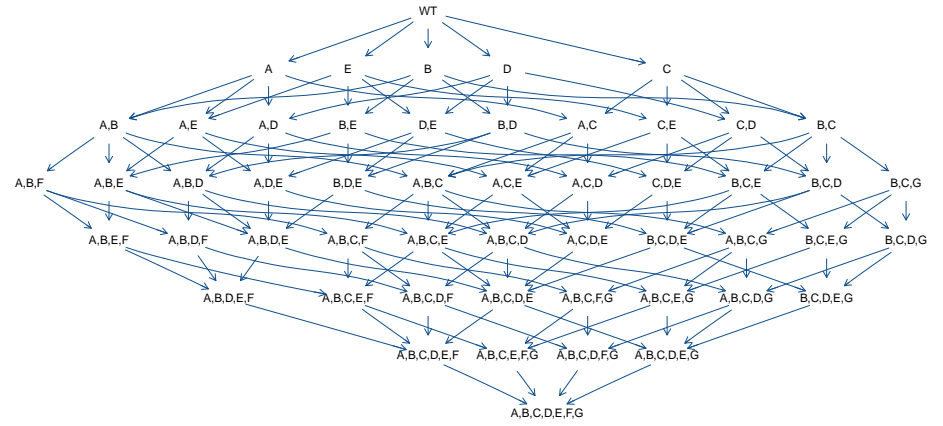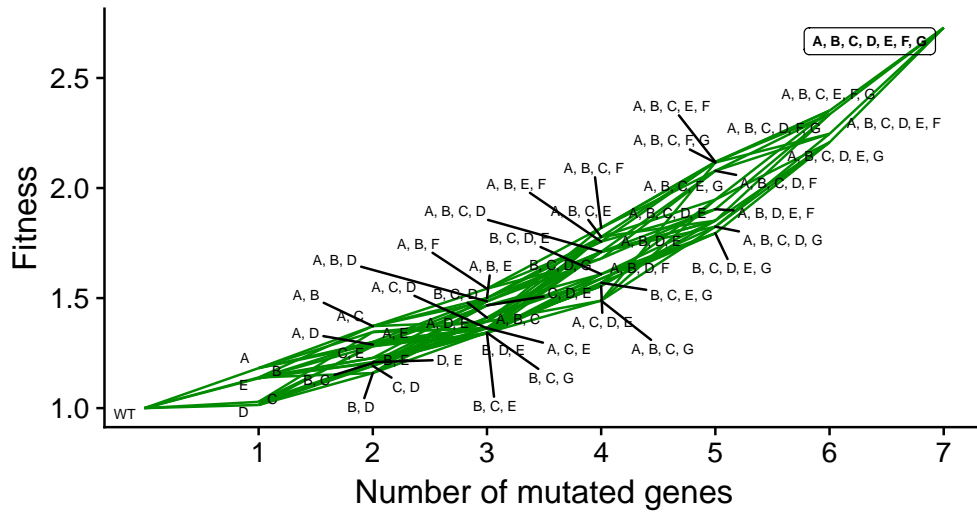



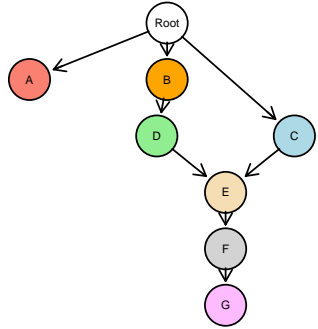

ID **xBMT9dOS3zBvChSy**  
 acc genotypes **18**  
 peaks no back 1  
 removed edges 0  
 prop rem edges 0

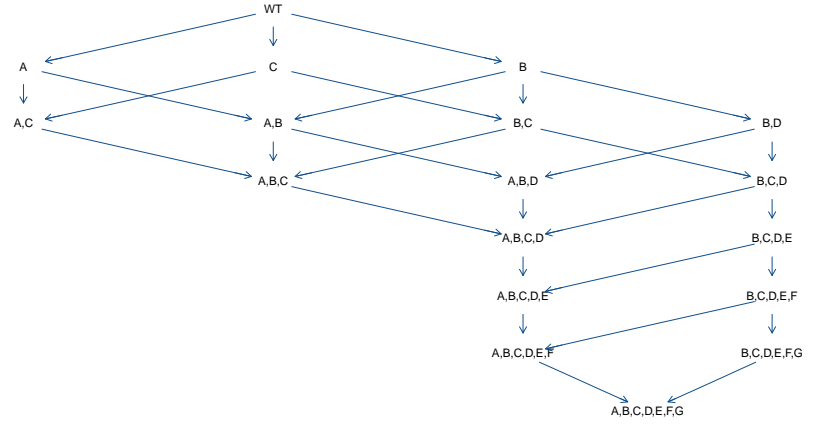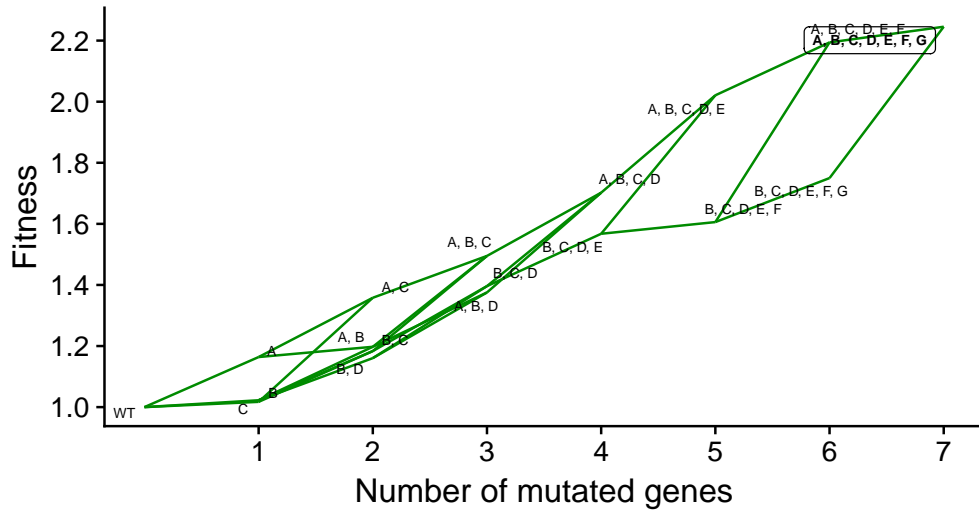

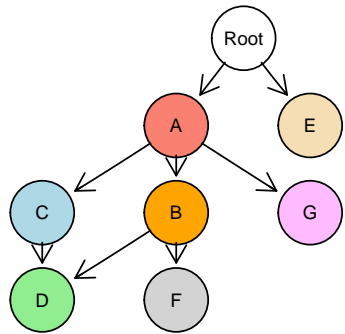

ID [xkgudeGhJGOIP7X7](#)  
 acc genotypes 34  
 peaks no back 1  
 removed edges 0  
 prop rem edges 0

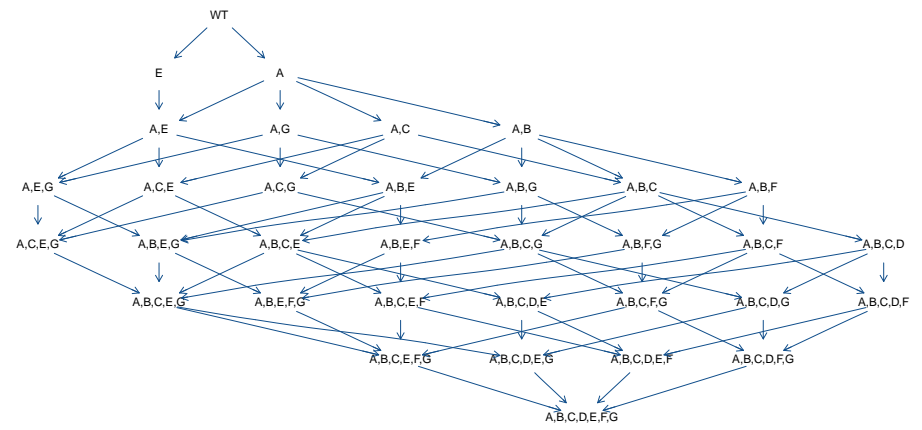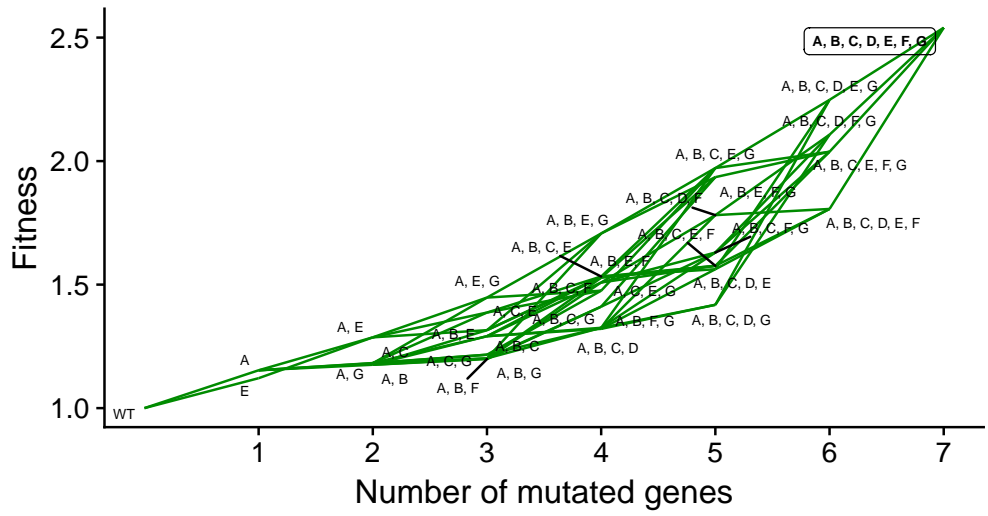

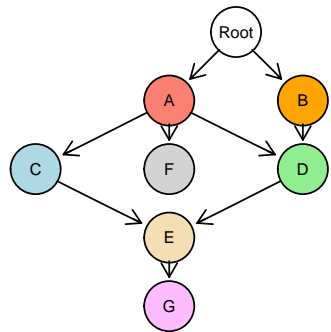

ID XoIBQBDPpWH3DwDQ  
 acc genotypes 18  
 peaks no back 1  
 removed edges 0  
 prop rem edges 0

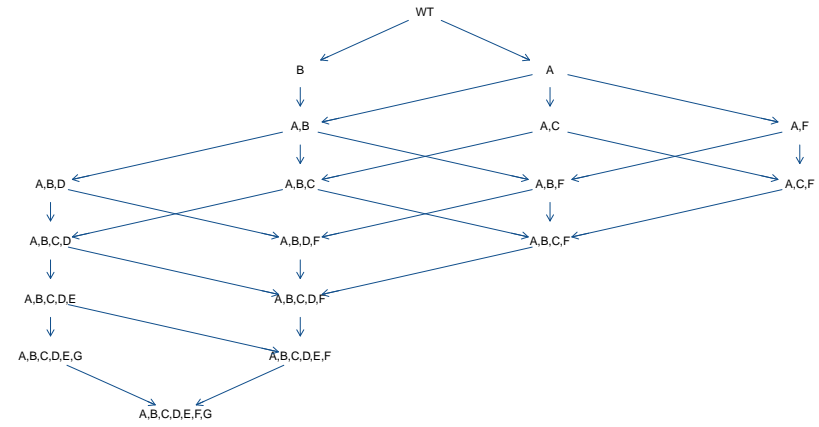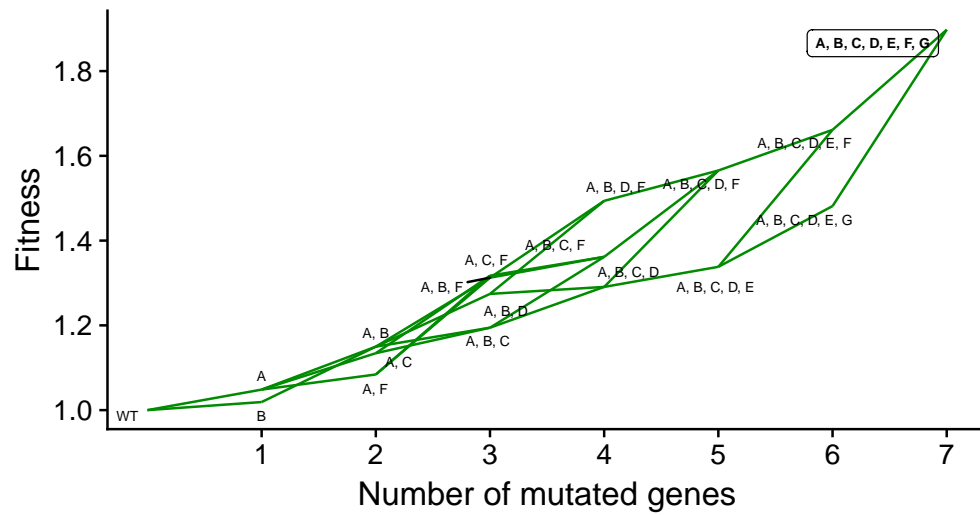

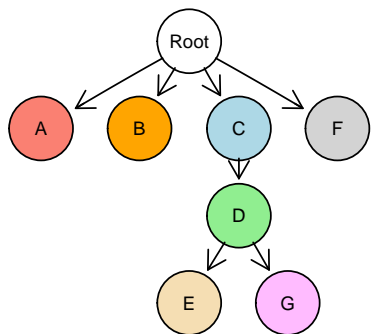

ID **XRovuAJWINYIVJHn**  
 acc genotypes **48**  
 peaks no back 1  
 removed edges 0  
 prop rem edges 0

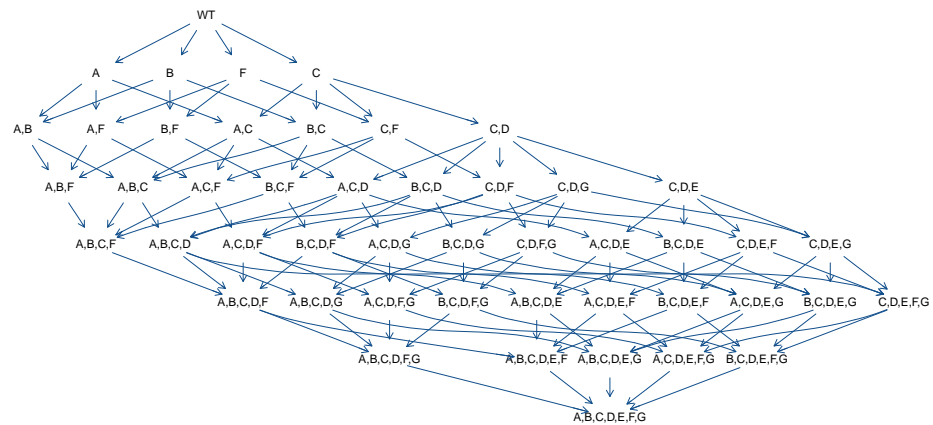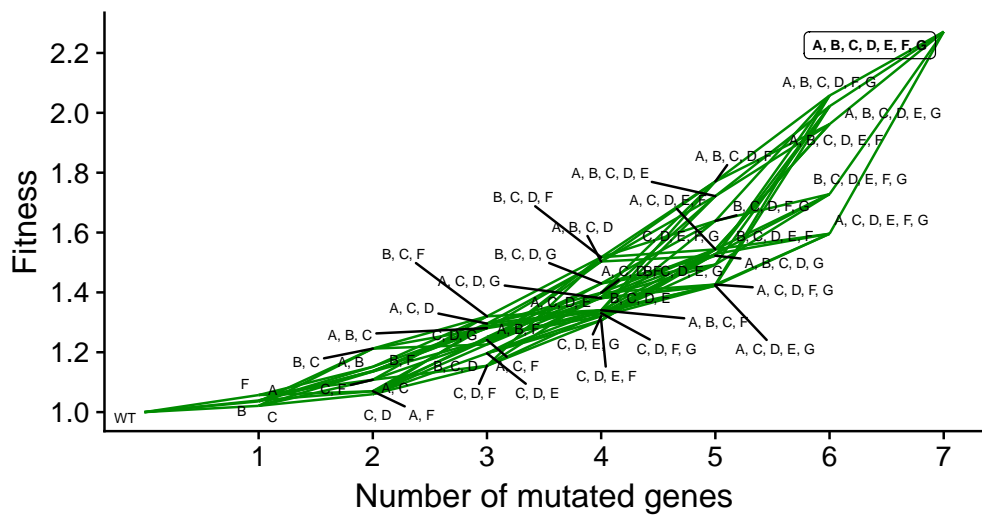

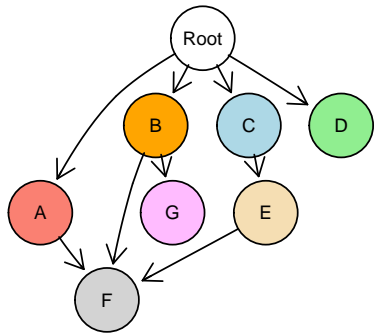

ID xVDfqEWHyqTK7PeA  
 acc genotypes 40  
 peaks no back 1  
 removed edges 0  
 prop rem edges 0

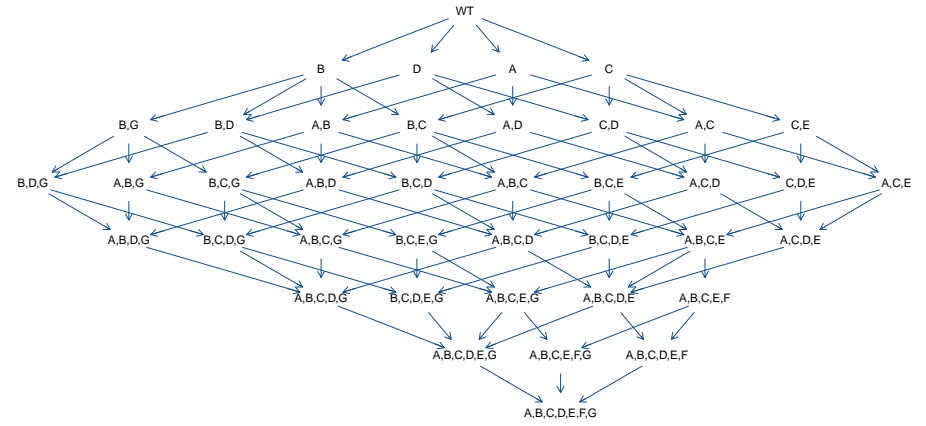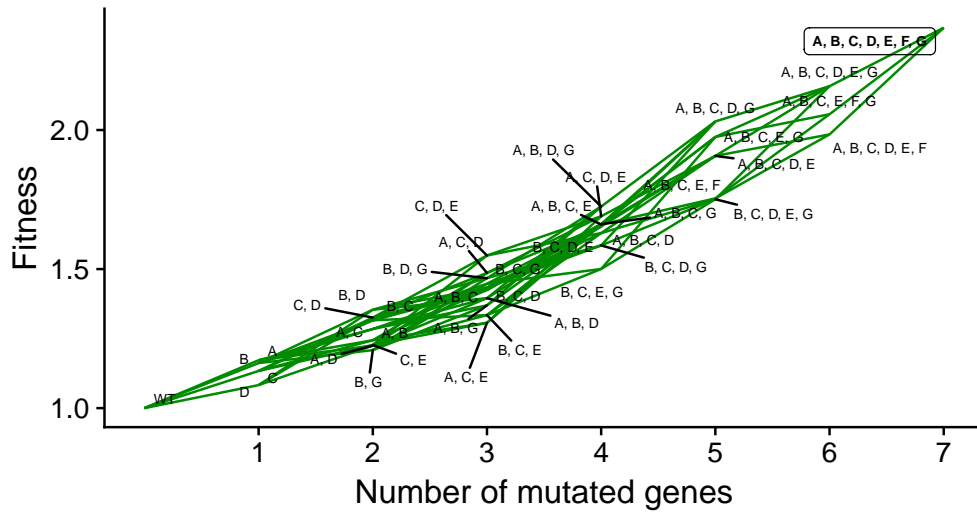

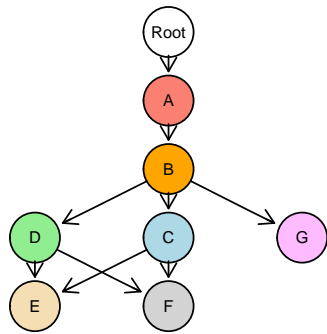

ID **y46oBk106Lnsh10yaQ**  
 acc genotypes **16**  
 peaks no back **1**  
 removed edges **0**  
 prop rem edges **0**

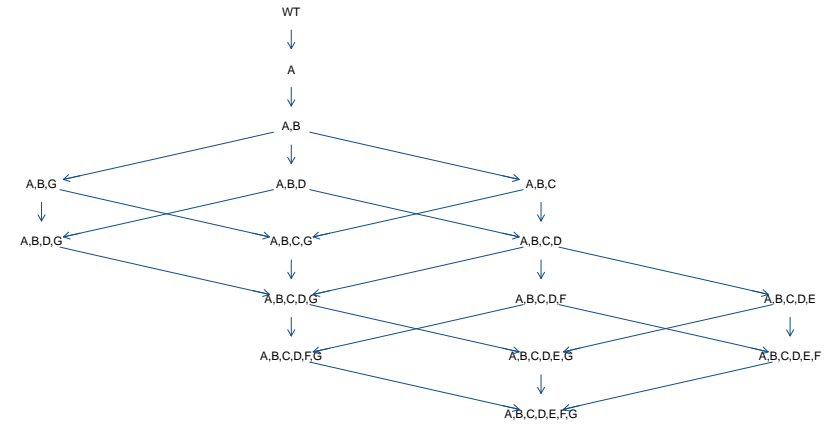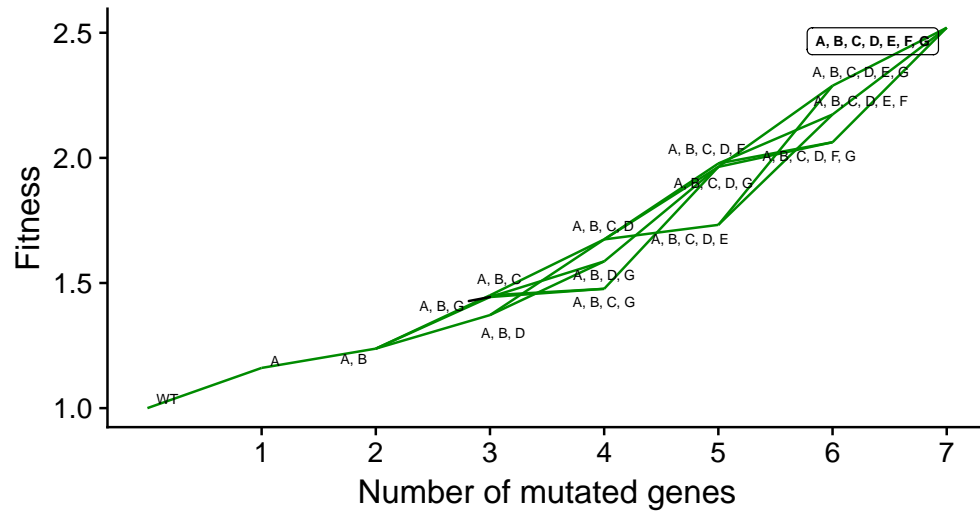

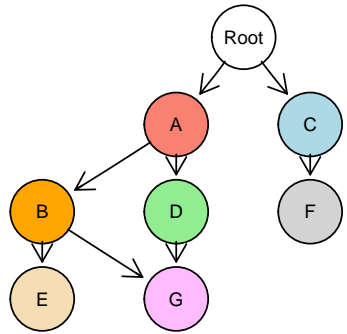

ID YbCf9soBzZRhuw10  
 acc genotypes 27  
 peaks no back 1  
 removed edges 0  
 prop rem edges 0

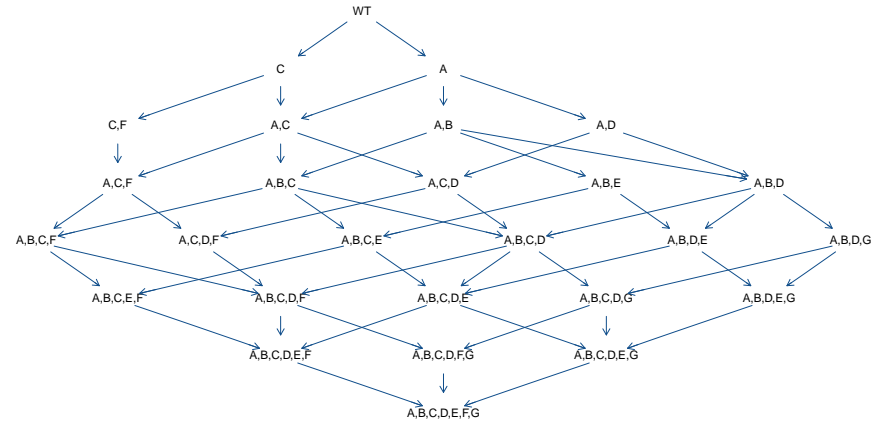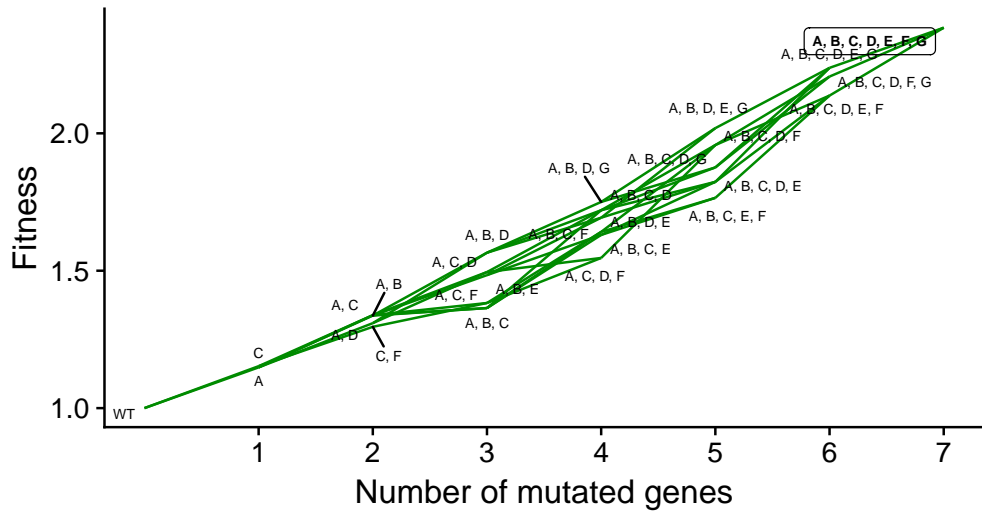

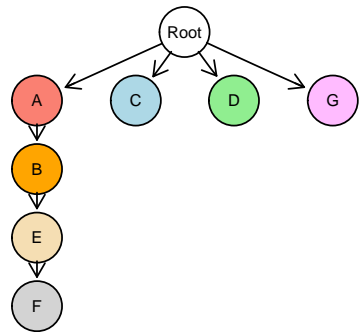

ID YFmY1csTgroJgPCG  
 acc genotypes 40  
 peaks no back 1  
 removed edges 0  
 prop rem edges 0

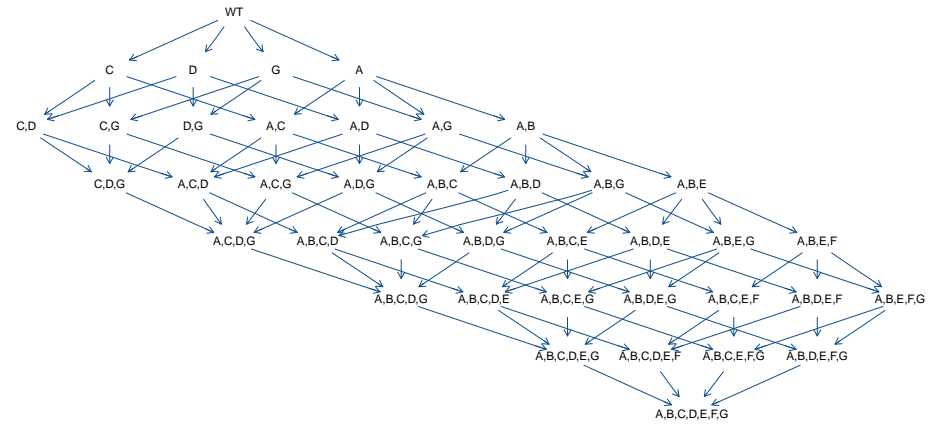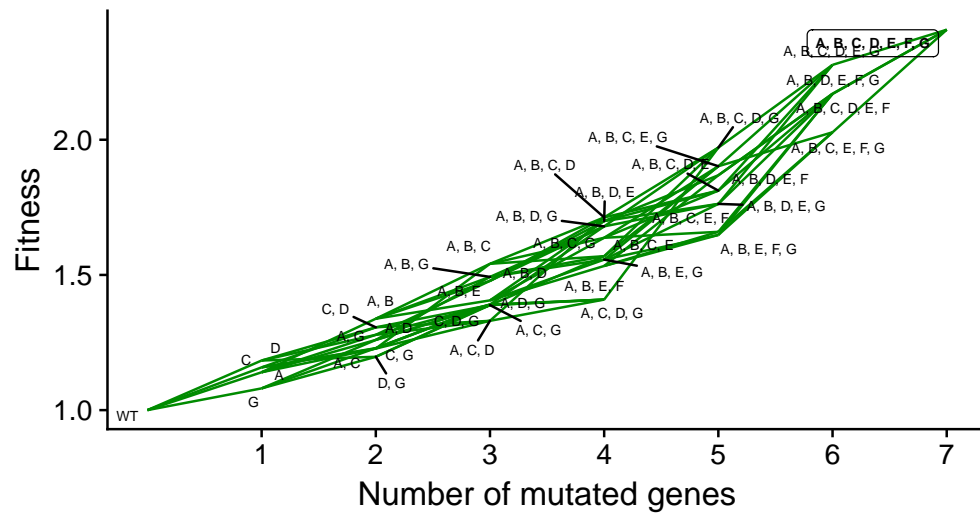



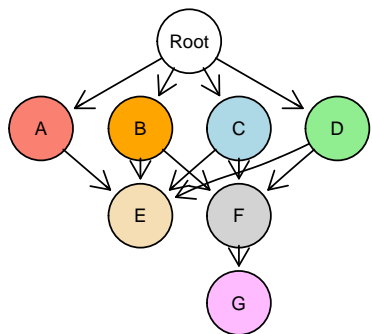

ID **yjwFeMSZVW68gVPI**  
 acc genotypes **23**  
 peaks no back 1  
 removed edges 0  
 prop rem edges 0

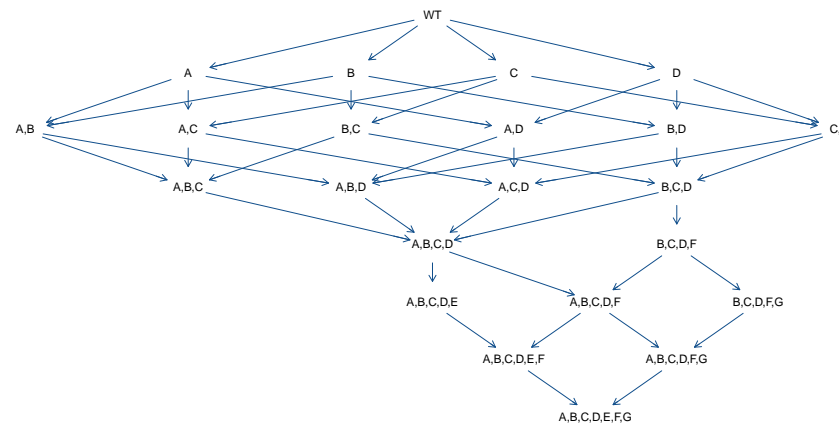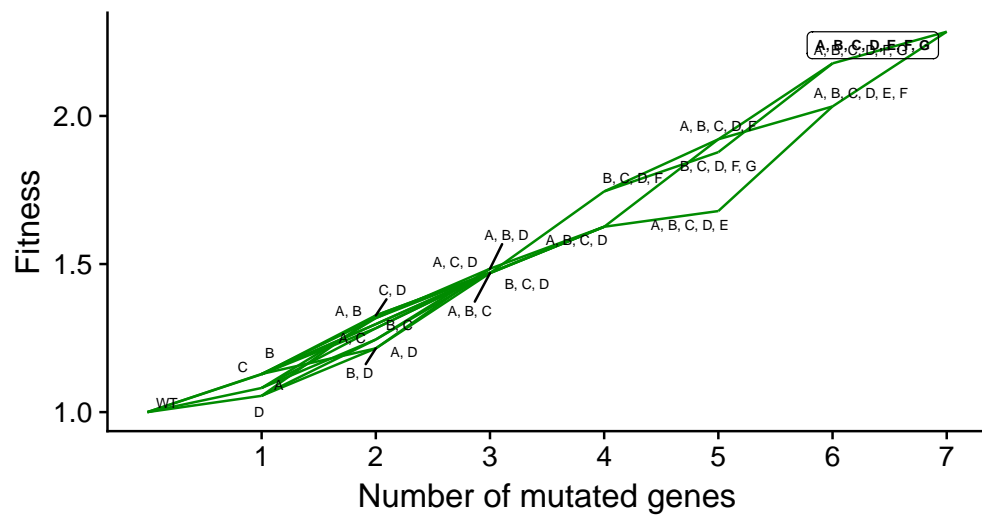

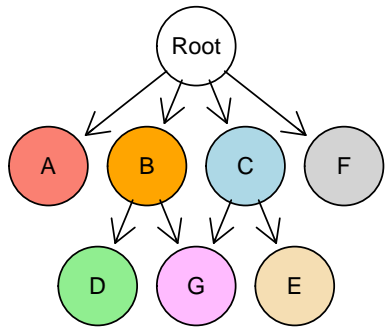

ID yVIAr6nny7plzy1a  
 acc genotypes 52  
 peaks no back 1  
 removed edges 0  
 prop rem edges 0

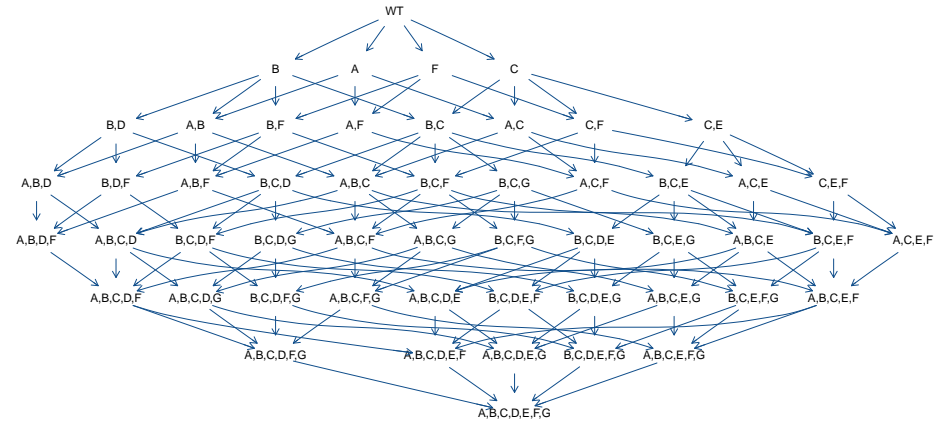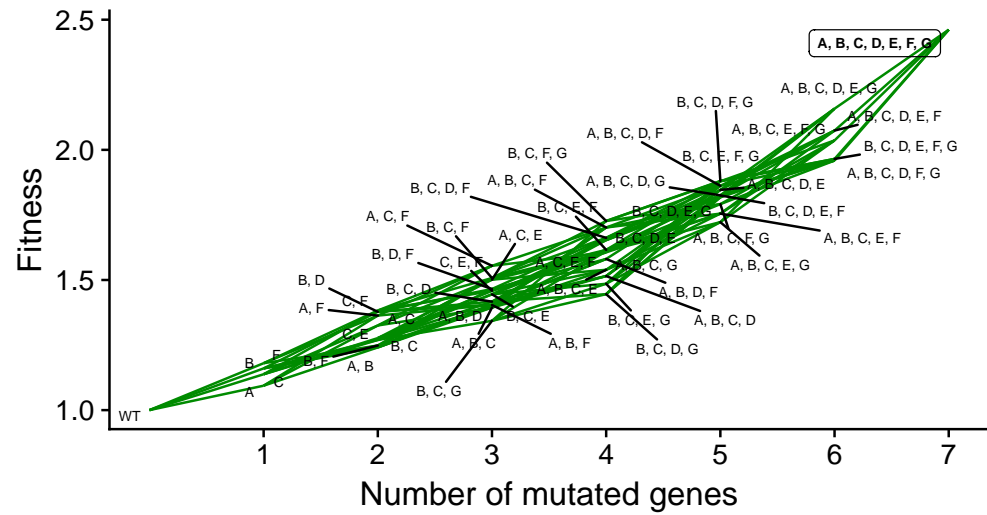

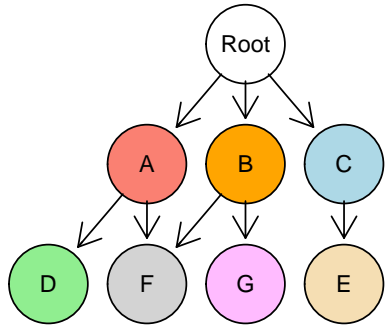

ID YZtw9jhxSkZdMuV2  
 acc genotypes 39  
 peaks no back 1  
 removed edges 0  
 prop rem edges 0

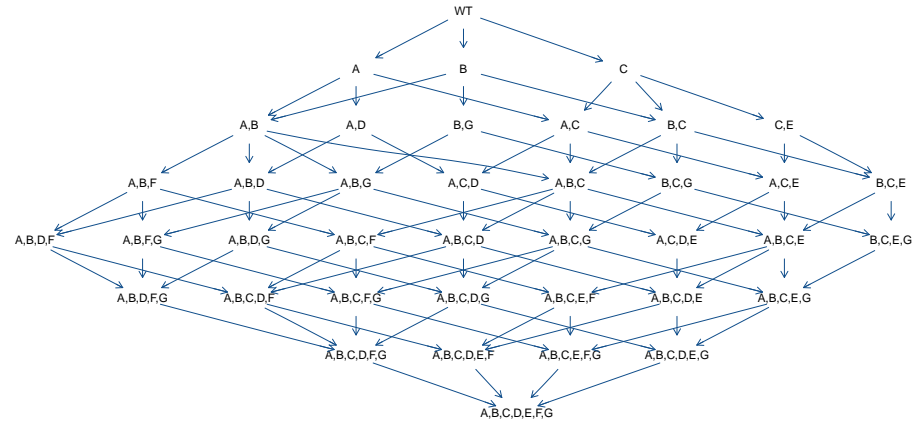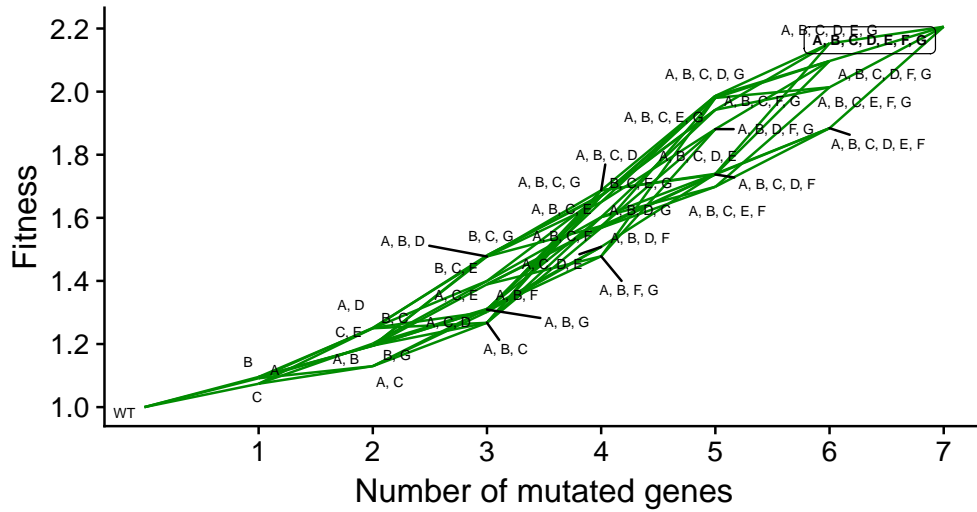

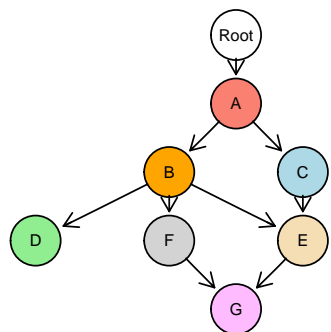

ID **Z5HeEO7UheuYVWra**  
 acc genotypes **17**  
 peaks no back 1  
 removed edges 0  
 prop rem edges 0

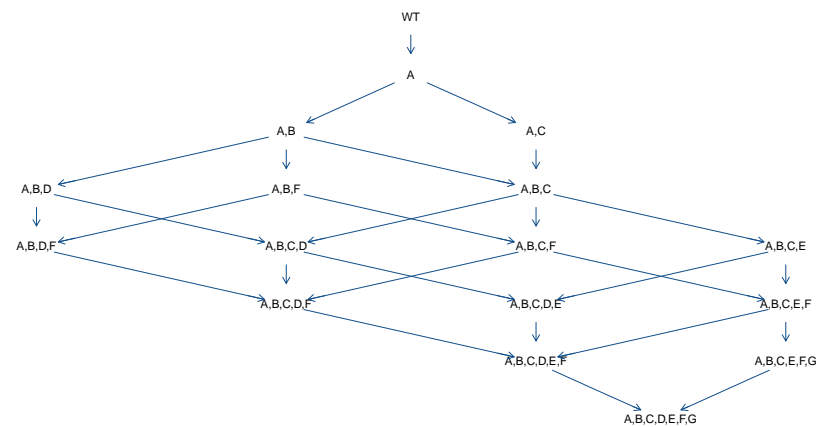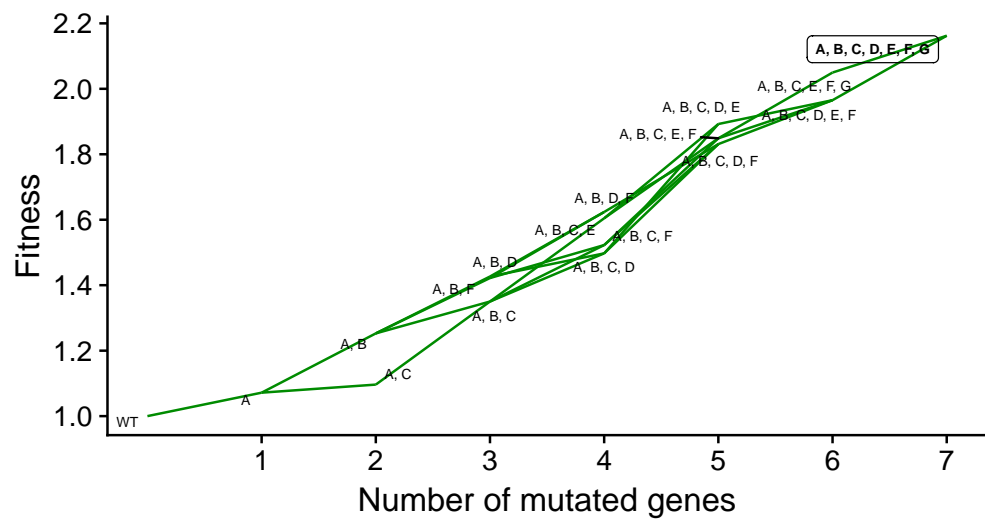

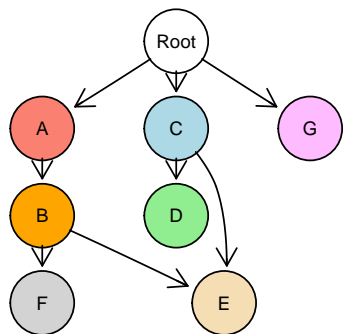

ID **zy1cmG2lWriY25OZ**  
 acc genotypes **32**  
 peaks no back 1  
 removed edges 0  
 prop rem edges 0

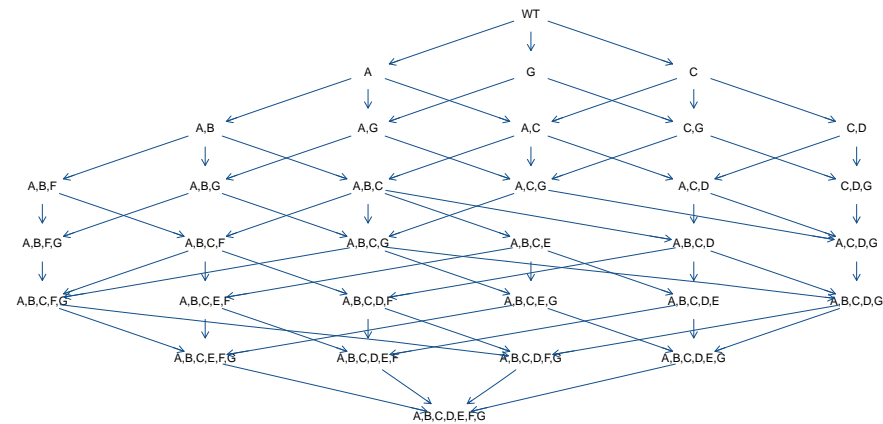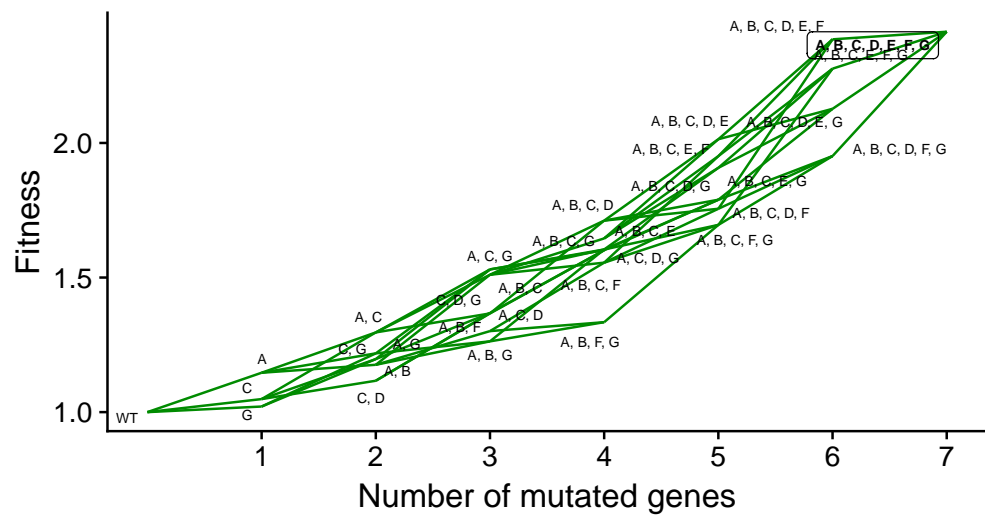

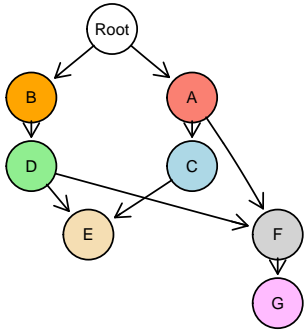

ID [10cxjmXXiW5qEyv73](#)  
 acc genotypes 16  
 peaks no back 3  
 removed edges 2  
 prop rem edges 0.087

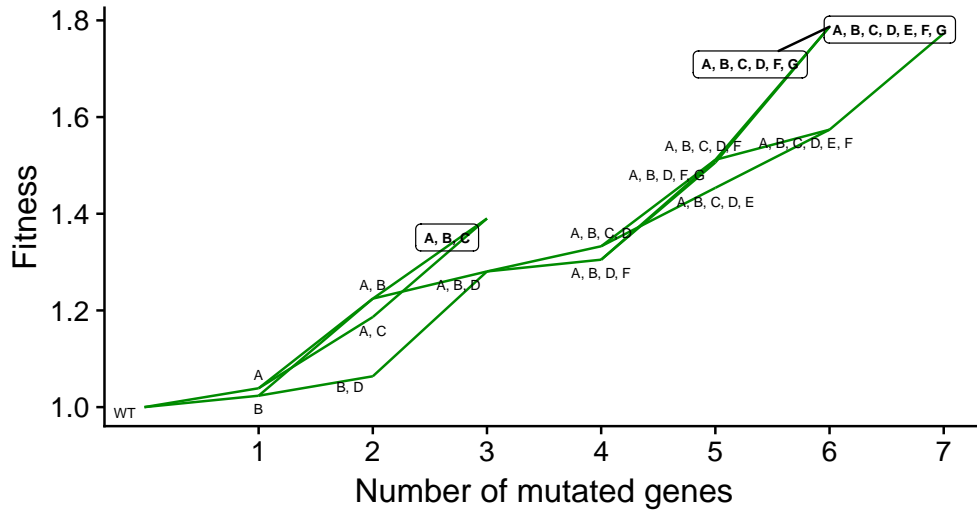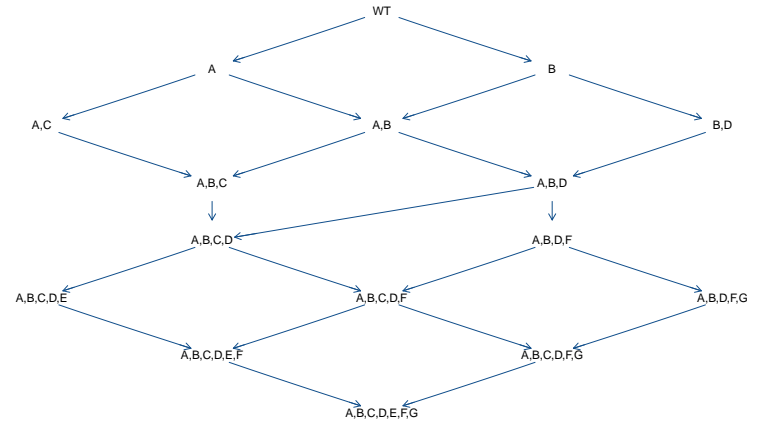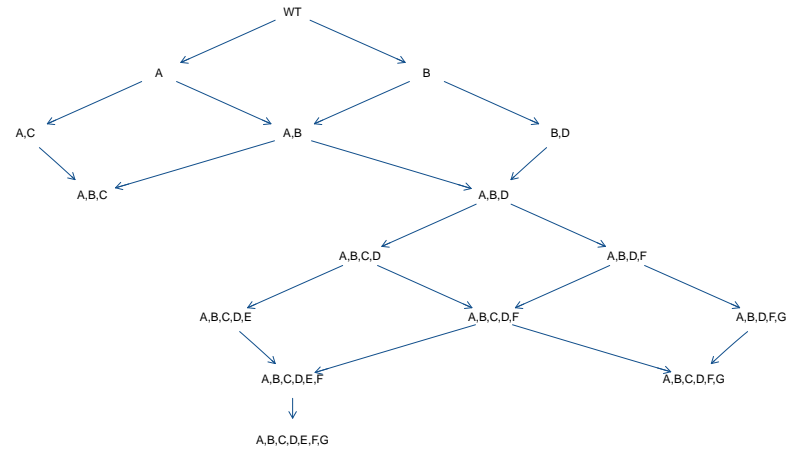

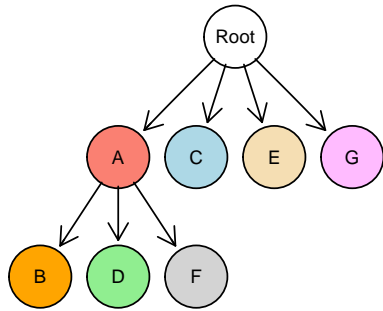

ID 1QsHDEe4ASsHeCxX  
 acc genotypes 72  
 peaks no back 9  
 removed edges 27  
 prop rem edges 0.127

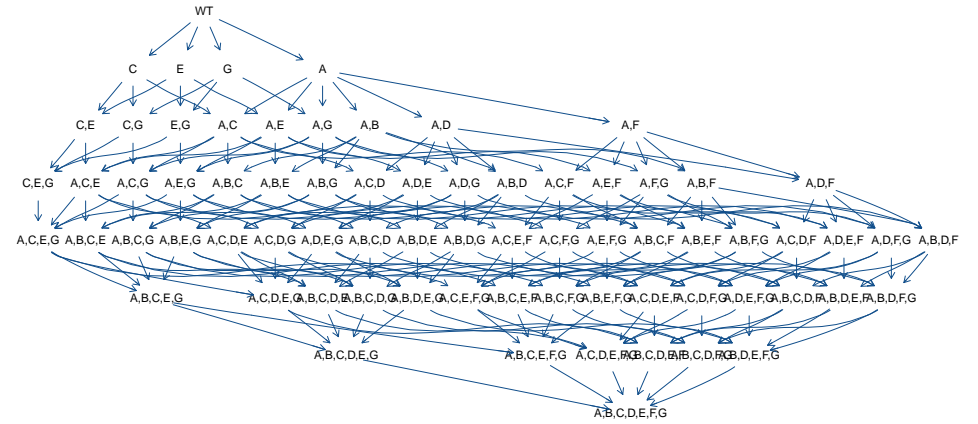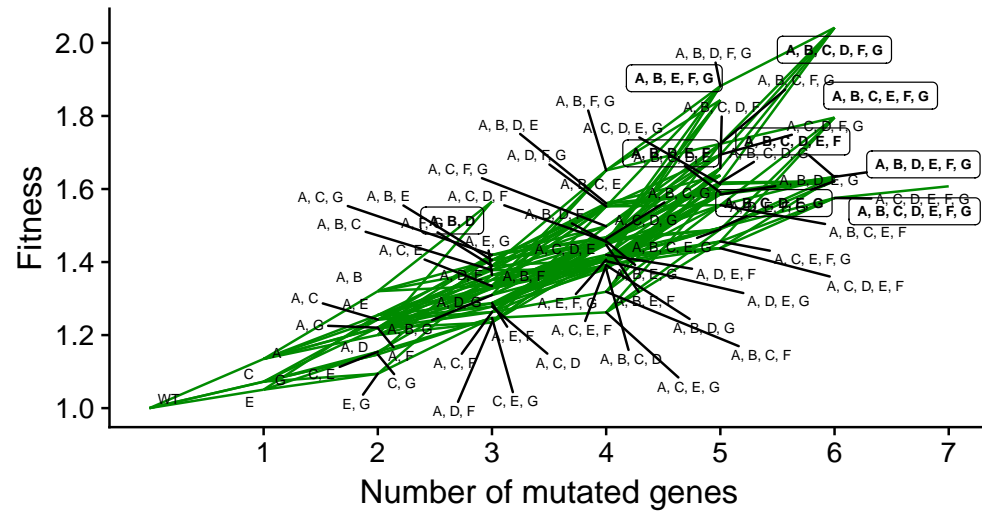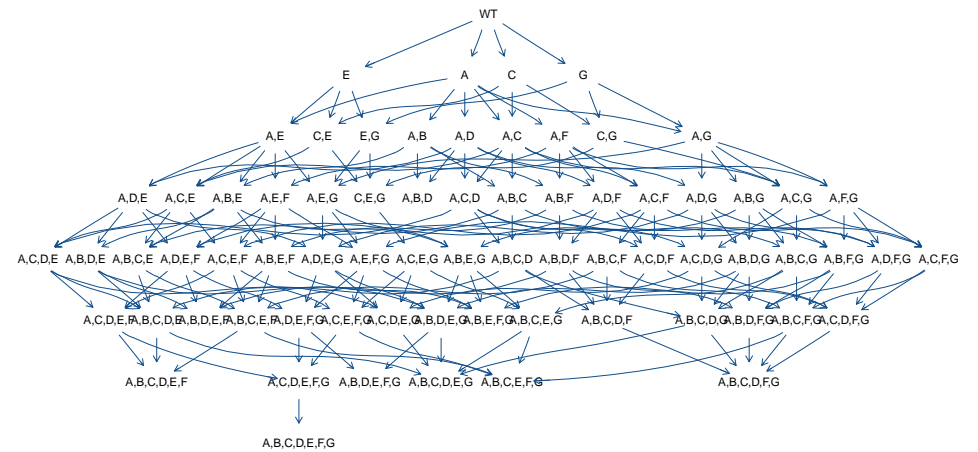

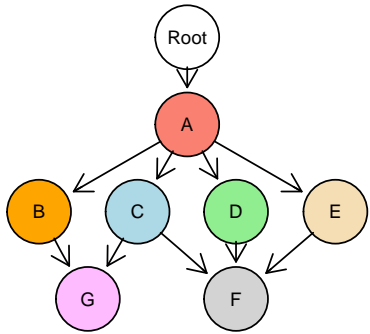

ID **2hKTyI9dwrqbrkDP**  
 acc genotypes **24**  
 peaks no back **4**  
 removed edges **8**  
 prop rem edges **0.174**

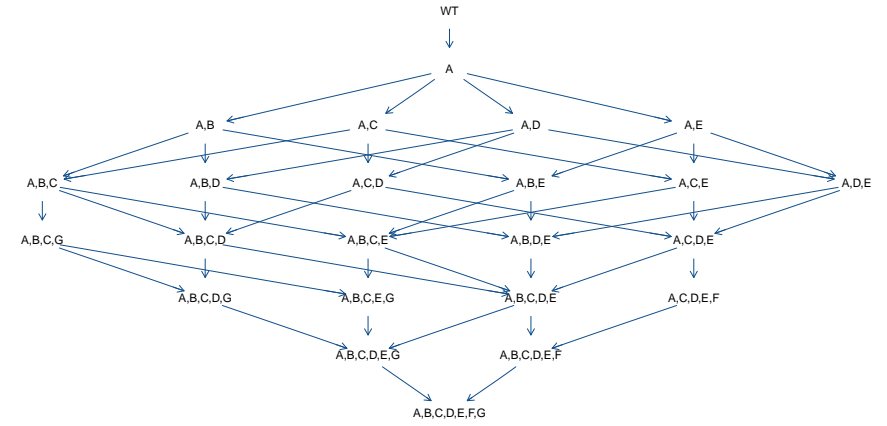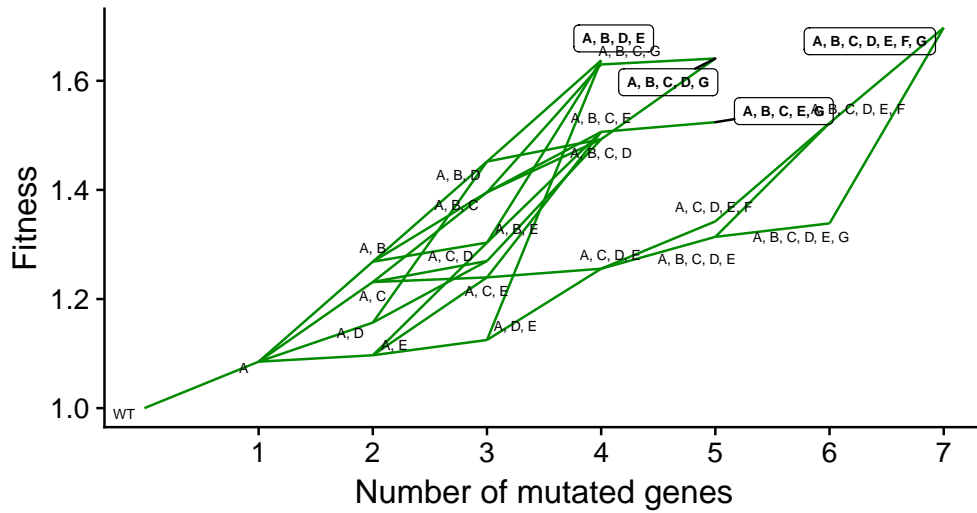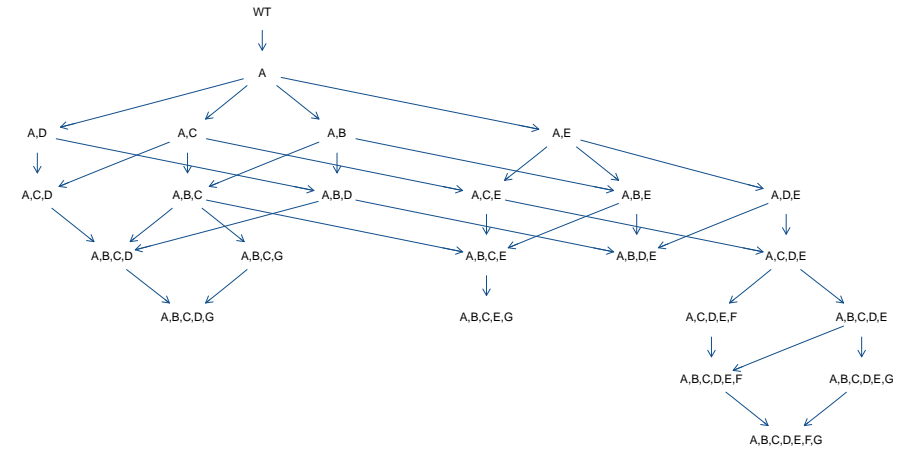



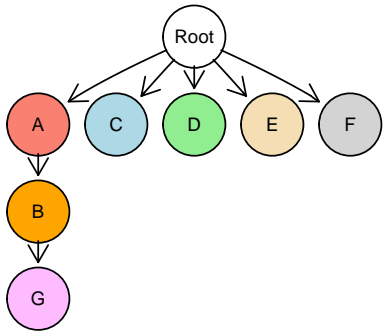

ID 3F1PDe5foEoGbGug  
 acc genotypes 64  
 peaks no back 9  
 removed edges 31  
 prop rem edges 0.176

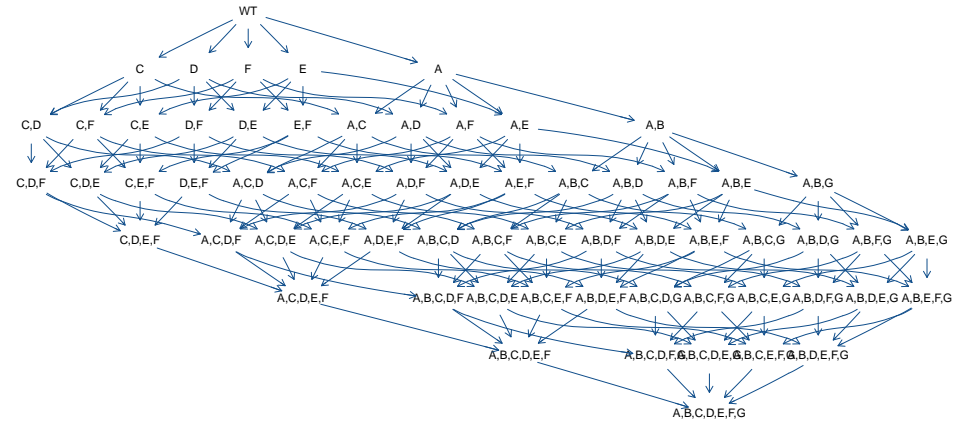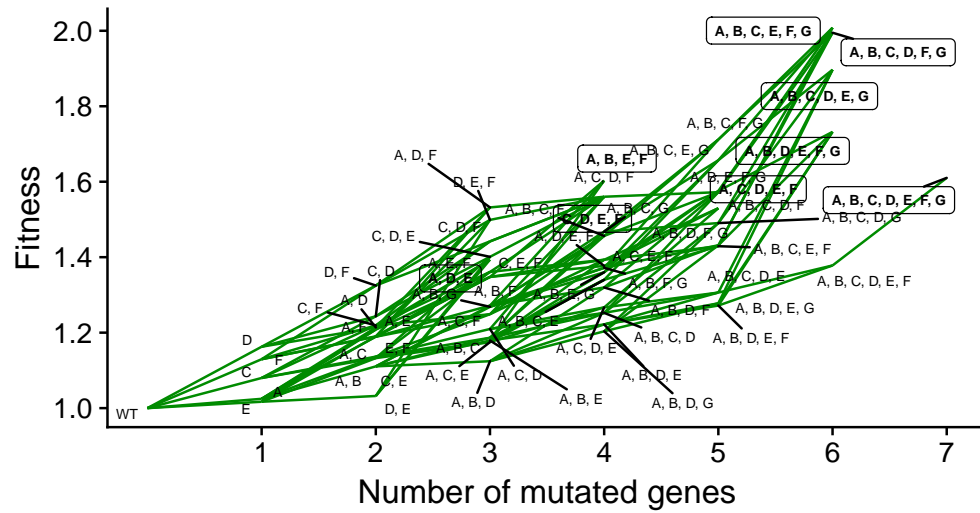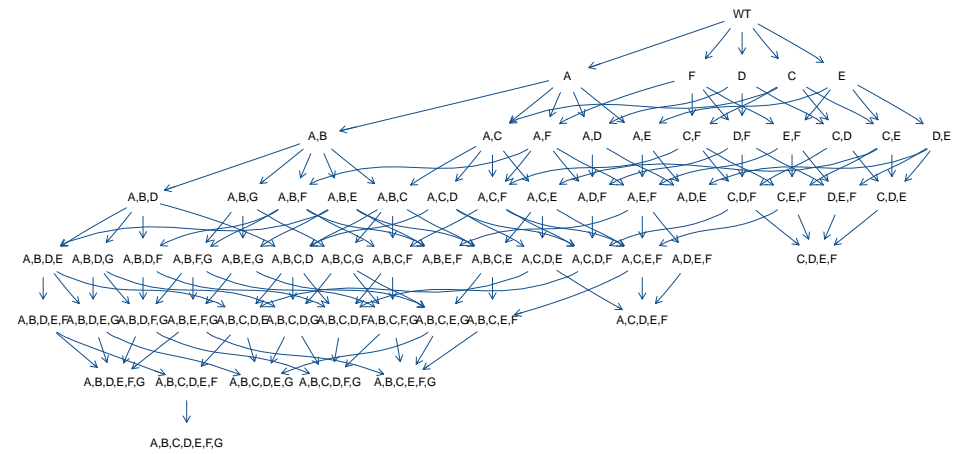

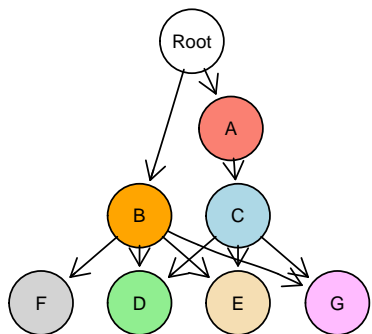

ID 3HeBeujvSFoM1FDd  
 acc genotypes 23  
 peaks no back 5  
 removed edges 7  
 prop rem edges 0.163

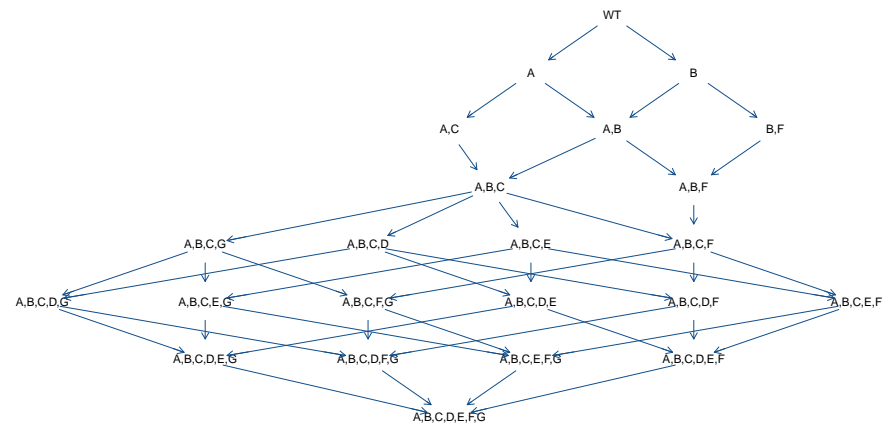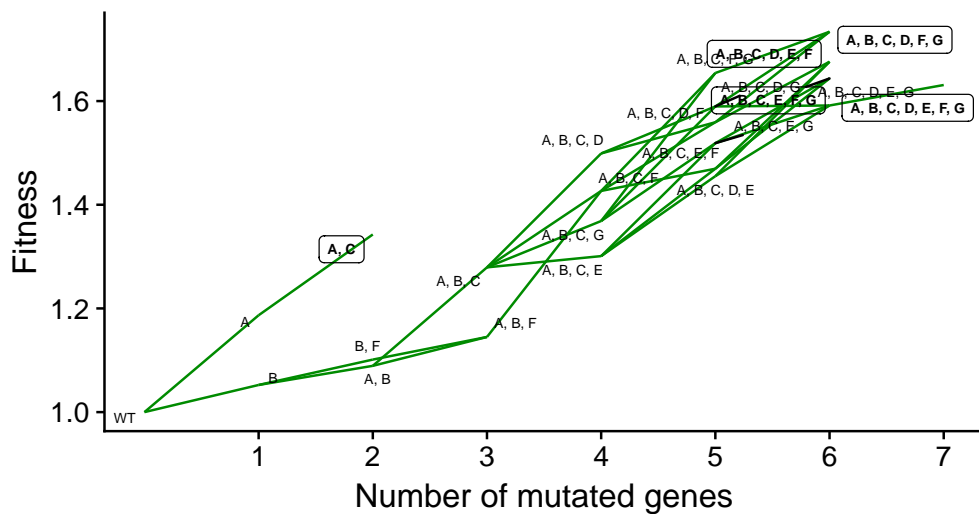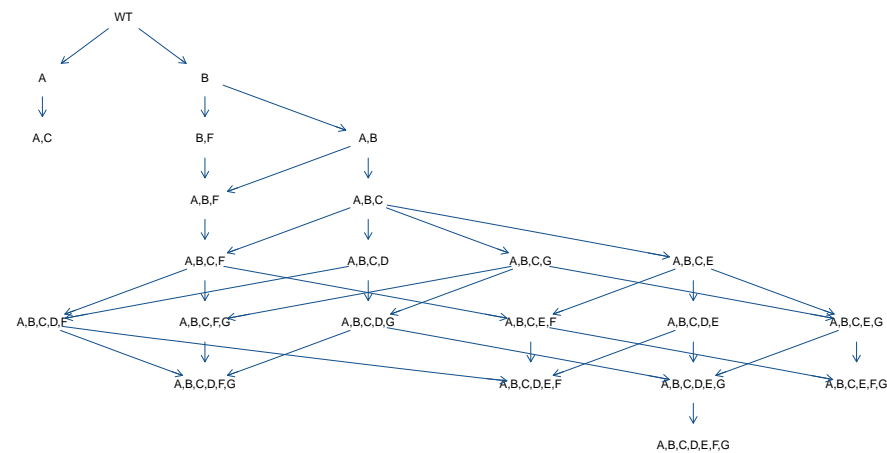

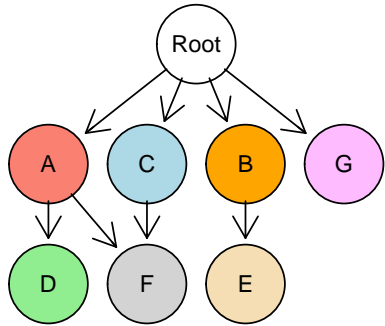

ID 3zLLGRM6bZ1renKV  
 acc genotypes 48  
 peaks no back 7  
 removed edges 25  
 prop rem edges 0.216

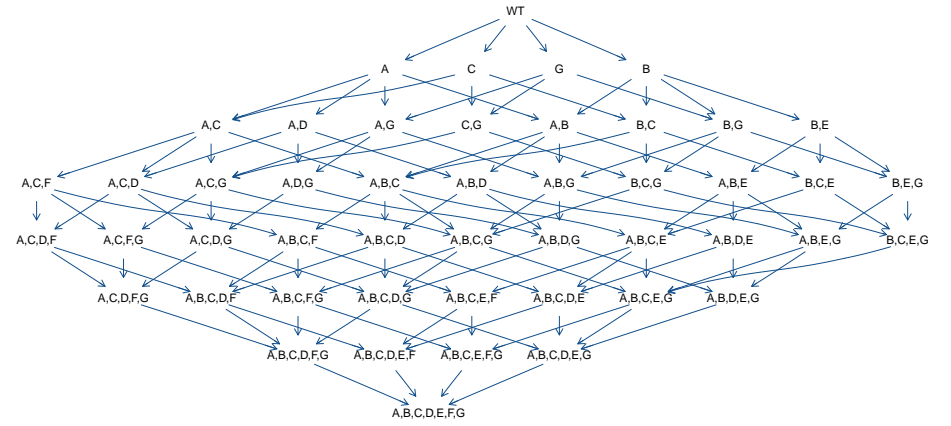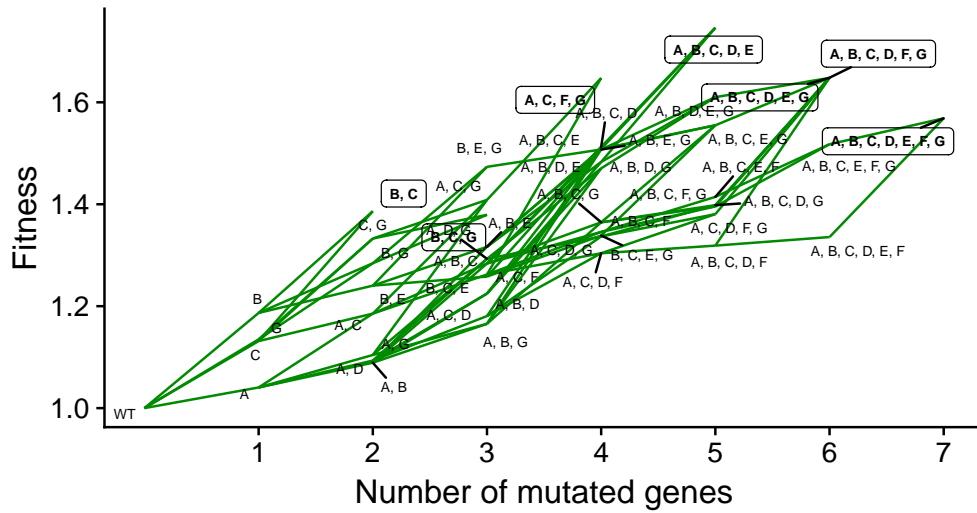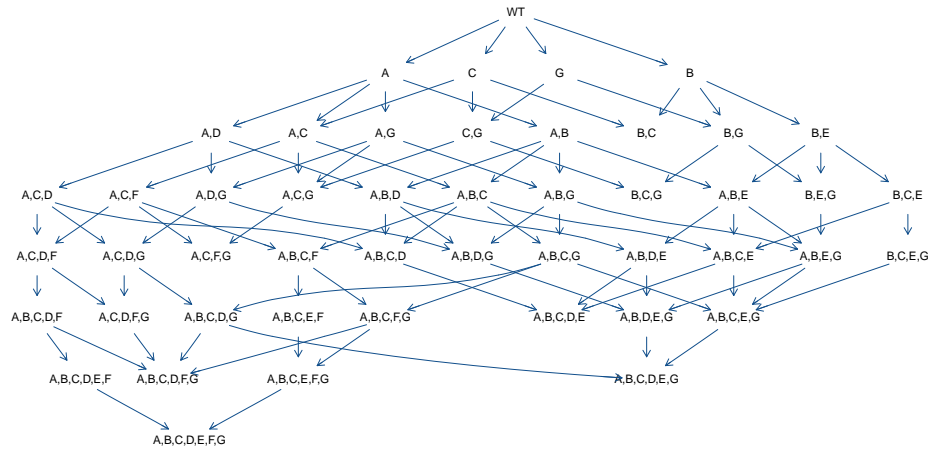

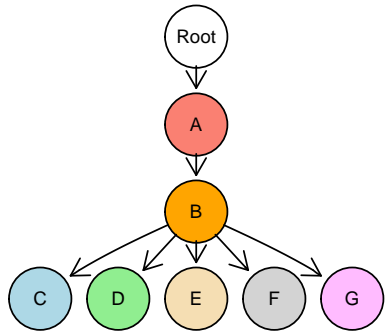

ID 410cr63nve1pNTOmC  
 acc genotypes 34  
 peaks no back 5  
 removed edges 5  
 prop rem edges 0.061

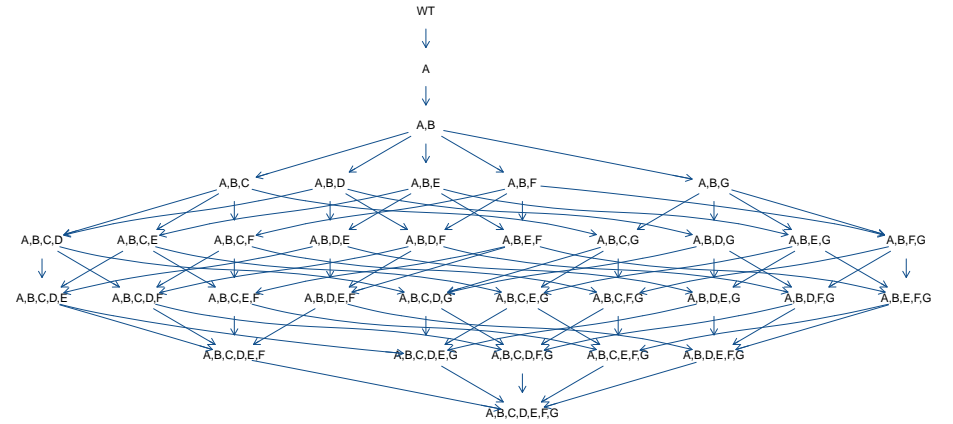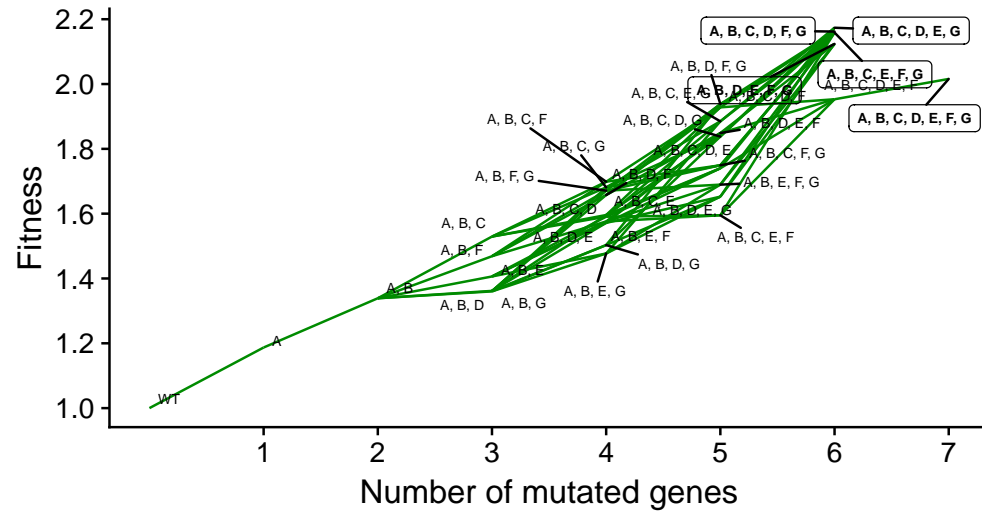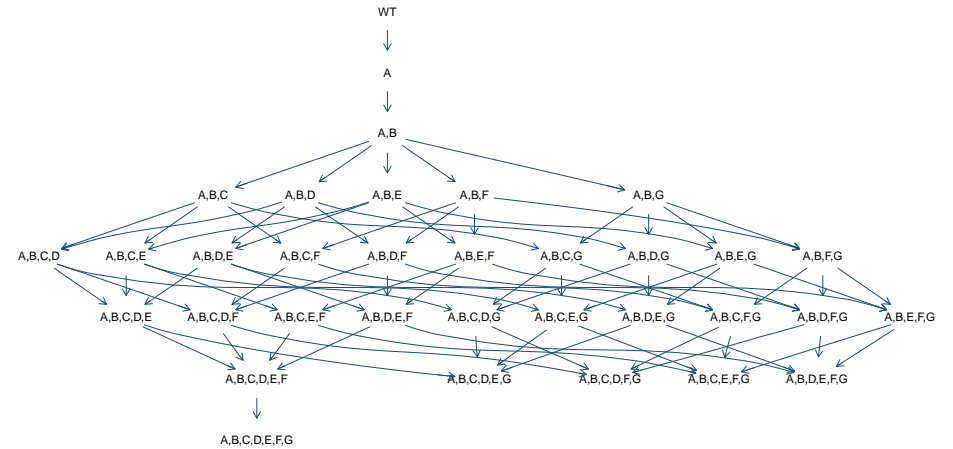

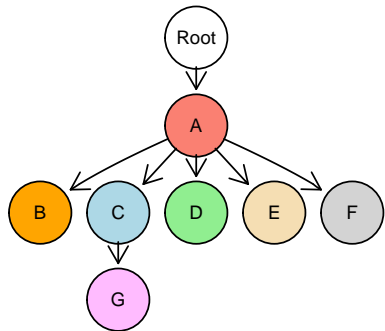

ID 4K18VIZE2xqKOhRH  
 acc genotypes 49  
 peaks no back 8  
 removed edges 22  
 prop rem edges 0.171

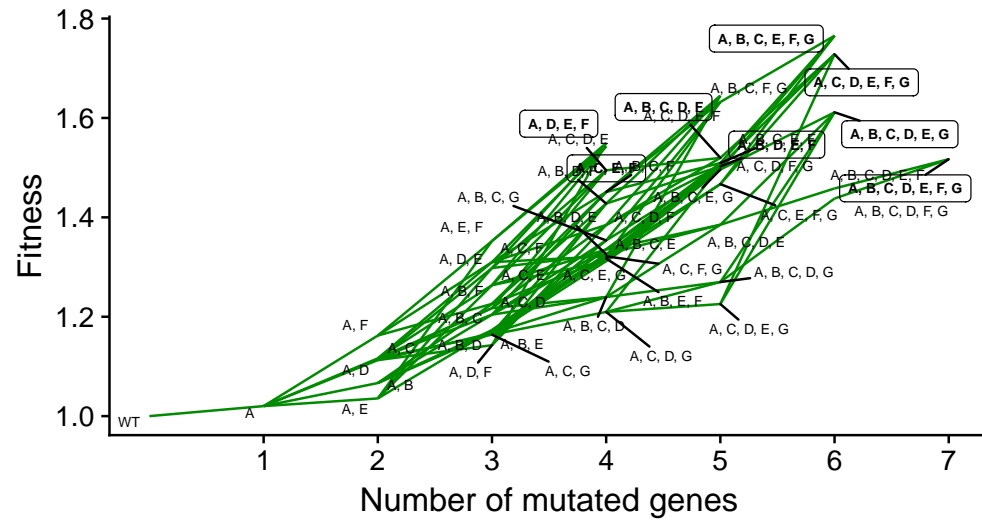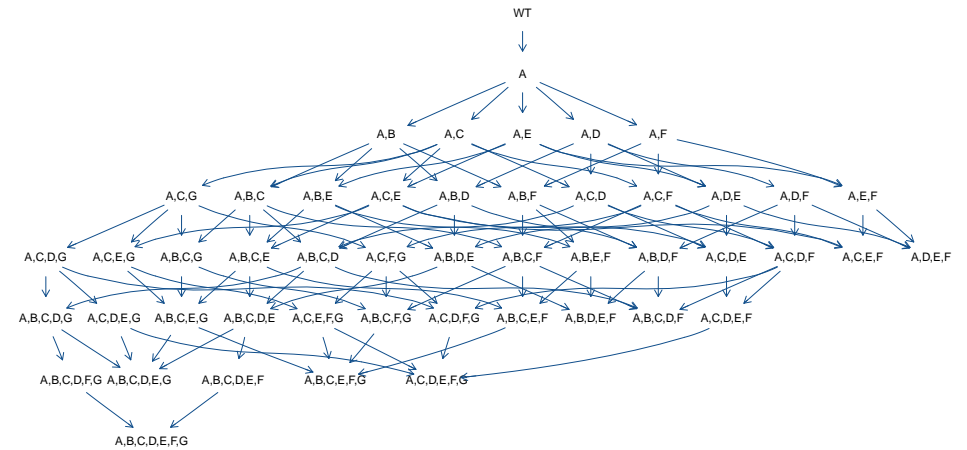

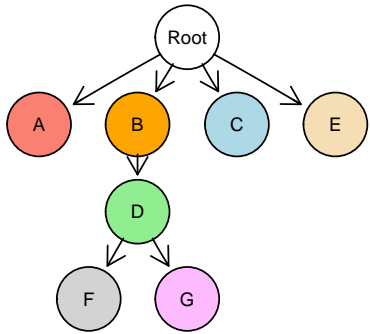

ID 4KzuP1MMEwOUSym1  
 acc genotypes 48  
 peaks no back 10  
 removed edges 26  
 prop rem edges 0.217

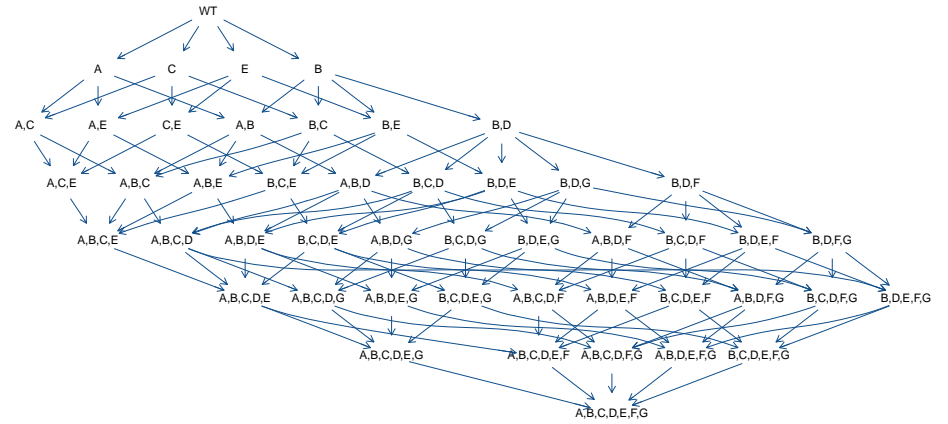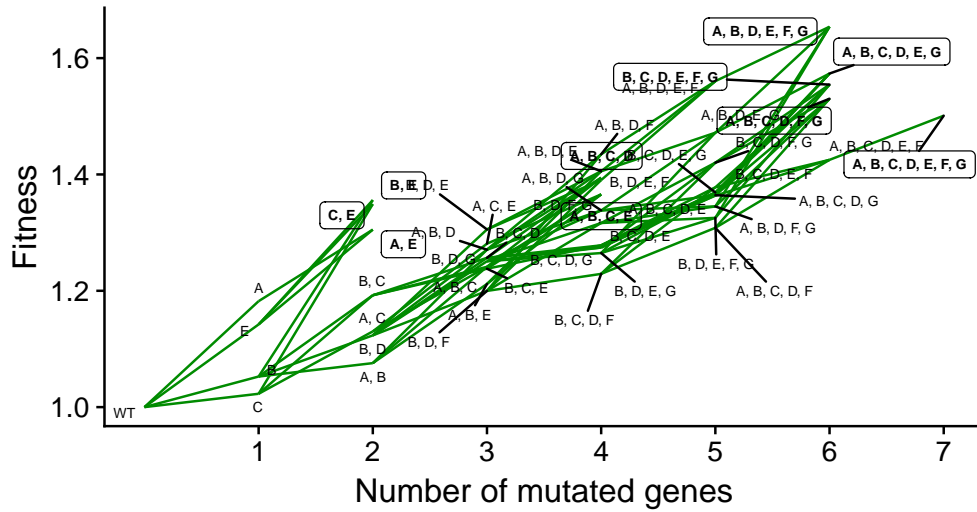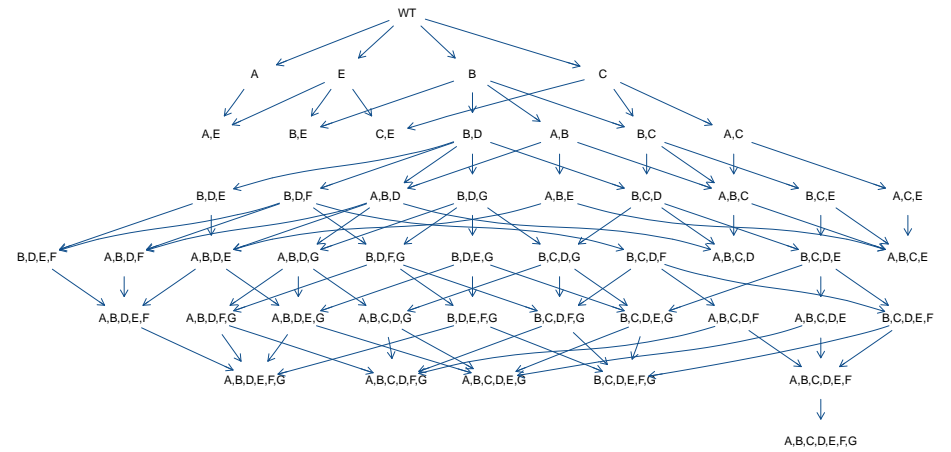

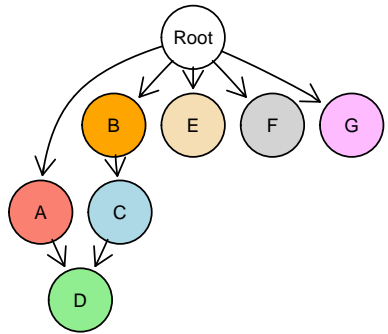

ID **4uRd77KBIQ1QZeh9**  
 acc genotypes **56**  
 peaks no back **9**  
 removed edges **36**  
 prop rem edges **0.243**

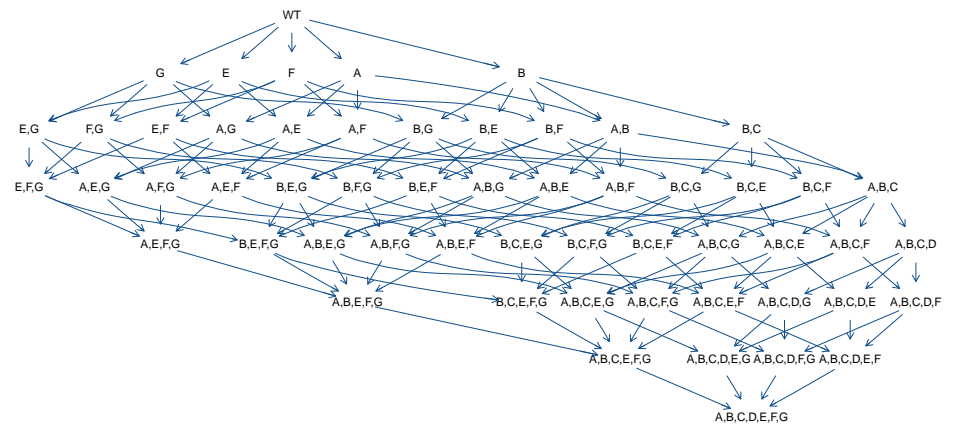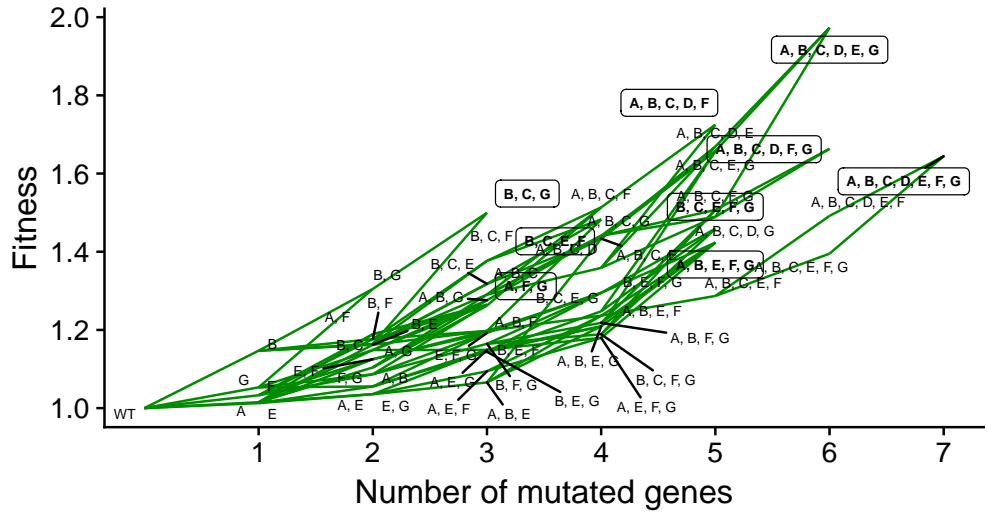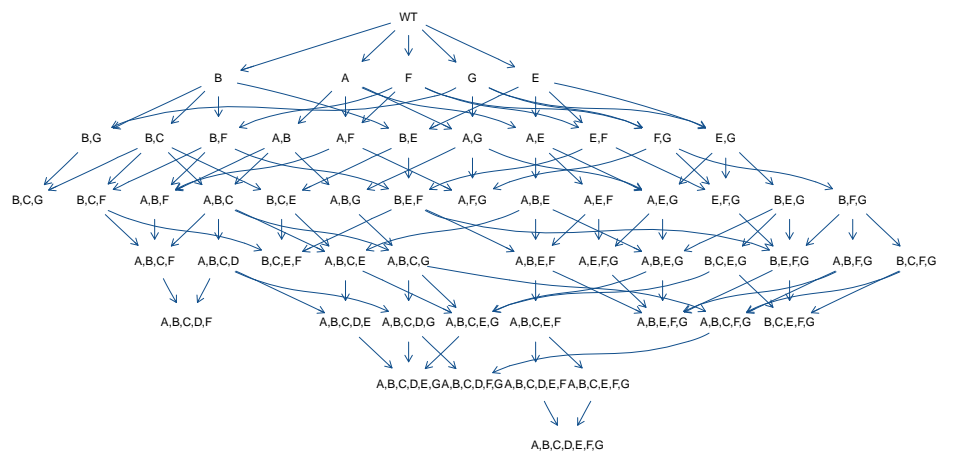





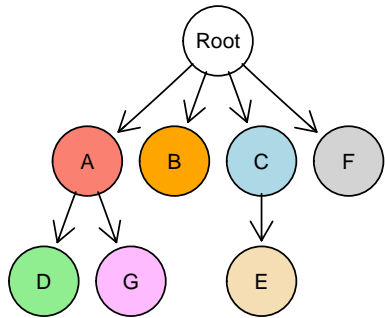

ID 4YkXkc14paEyTomW  
 acc genotypes 60  
 peaks no back 8  
 removed edges 28  
 prop rem edges 0.175

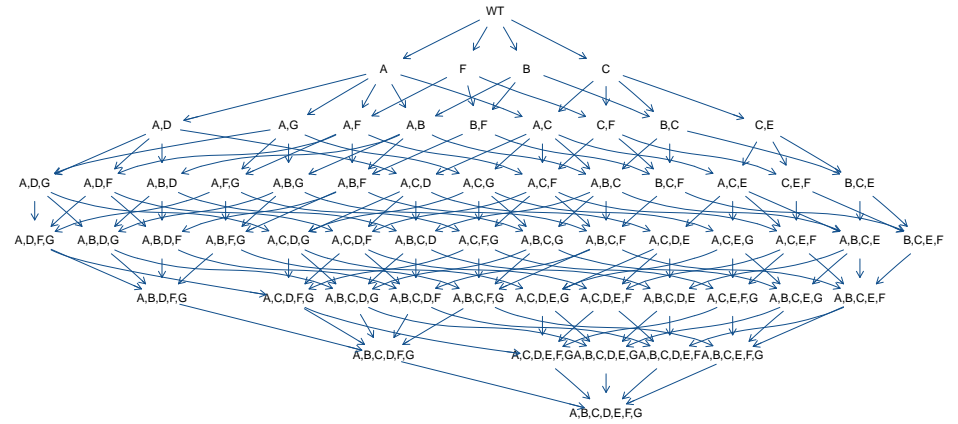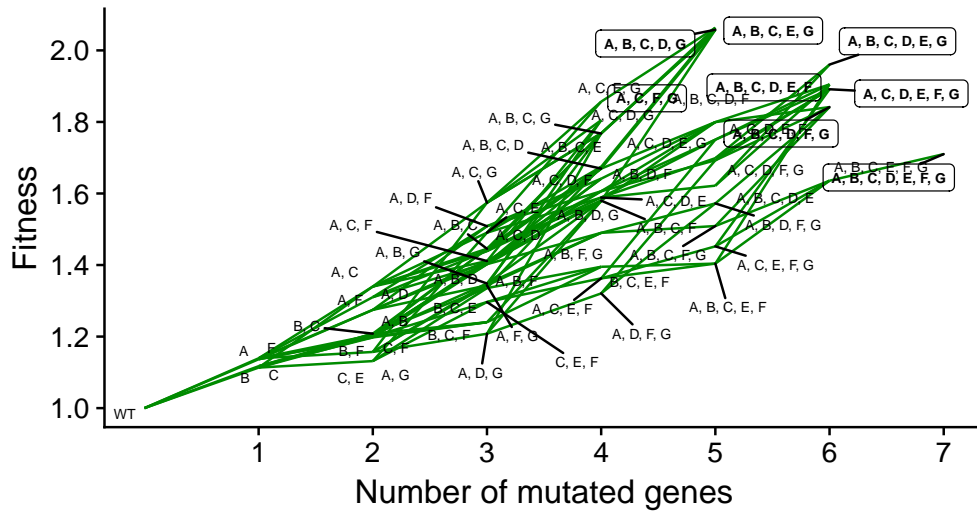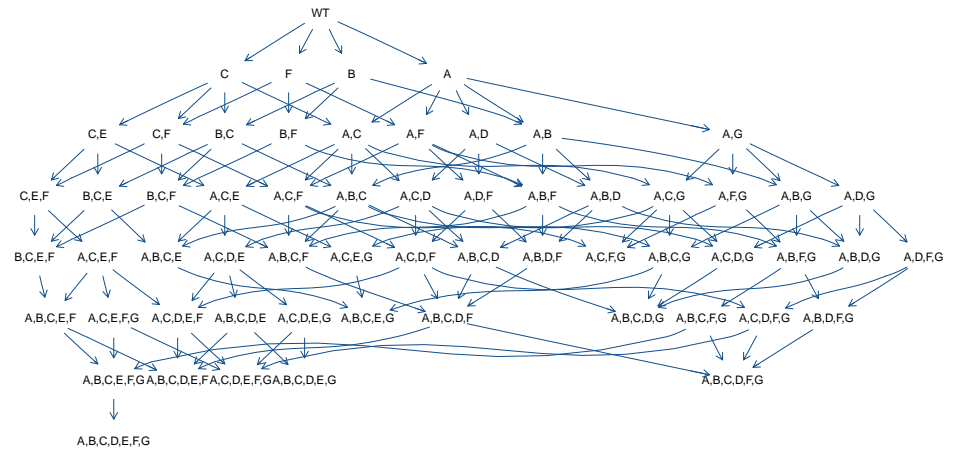

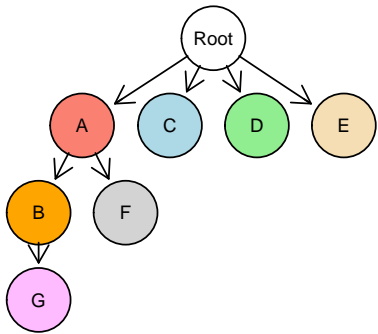

ID 5cLLbdWPensPhaD  
 acc genotypes 56  
 peaks no back 7  
 removed edges 20  
 prop rem edges 0.135

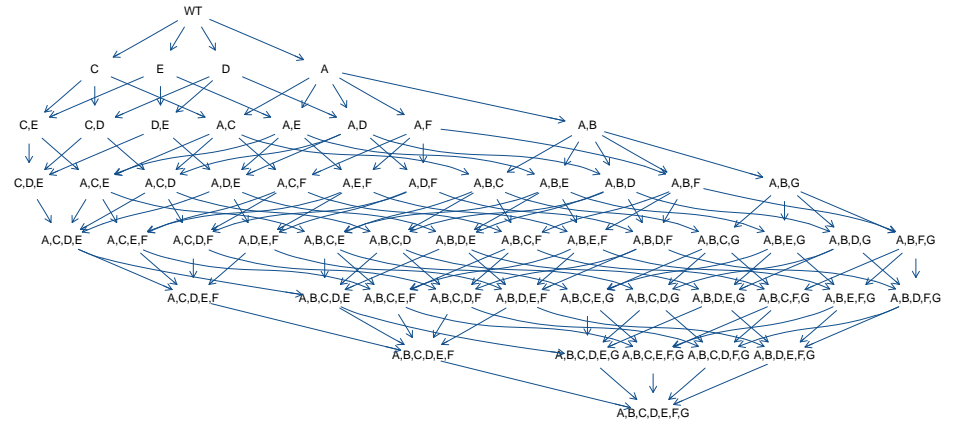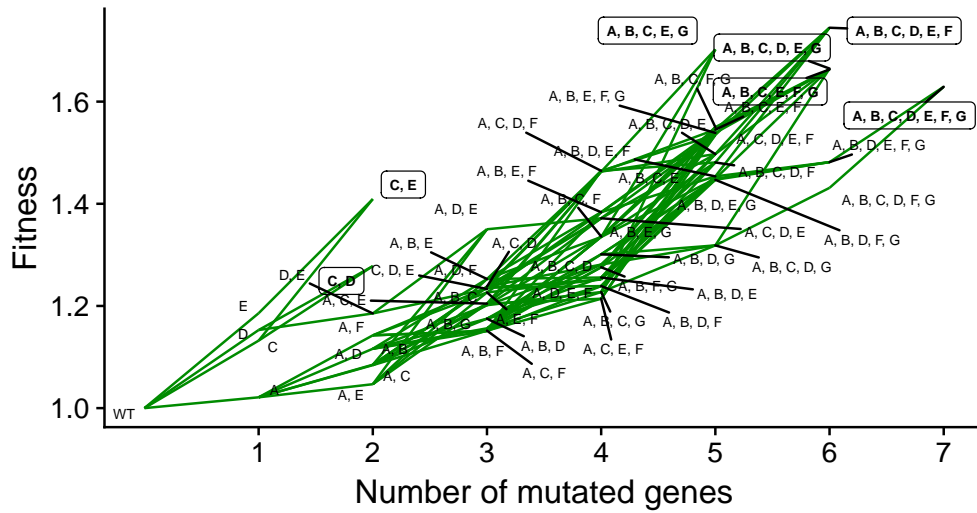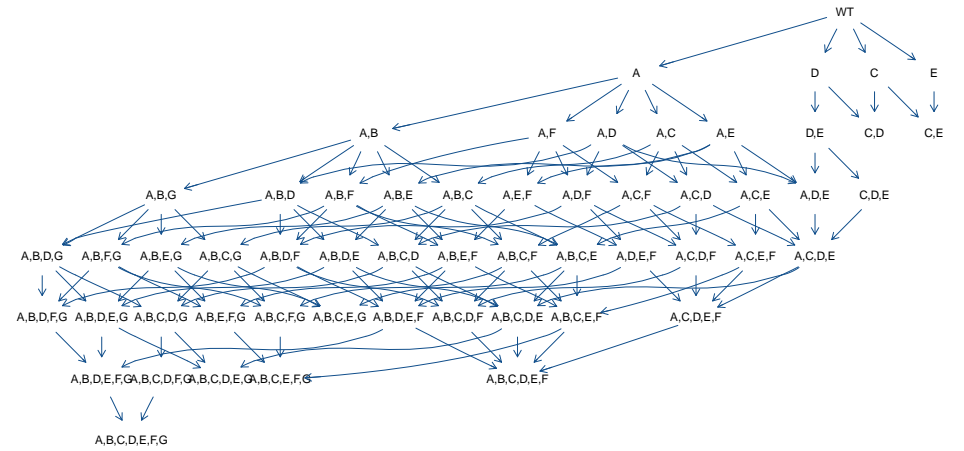

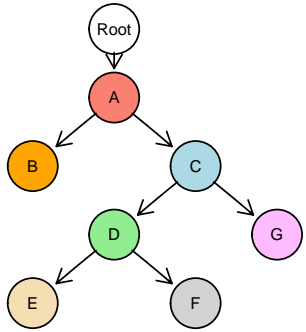

ID 5EI6S7TMXAPy65pq  
 acc genotypes 23  
 peaks no back 2  
 removed edges 3  
 prop rem edges 0.068

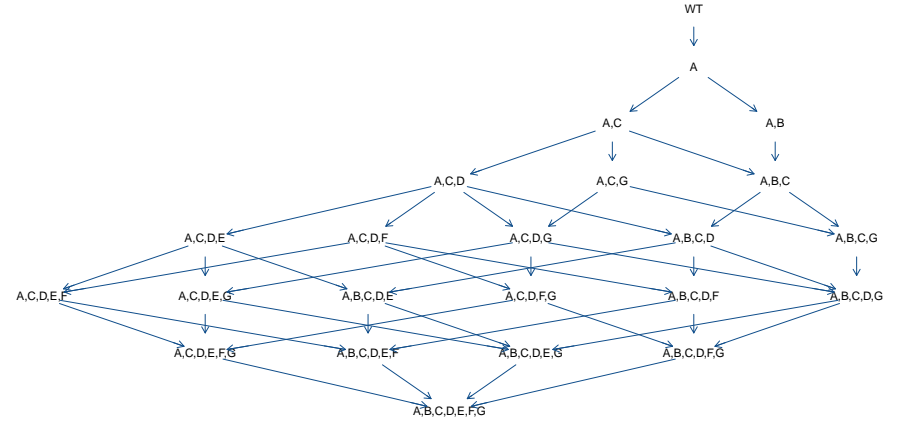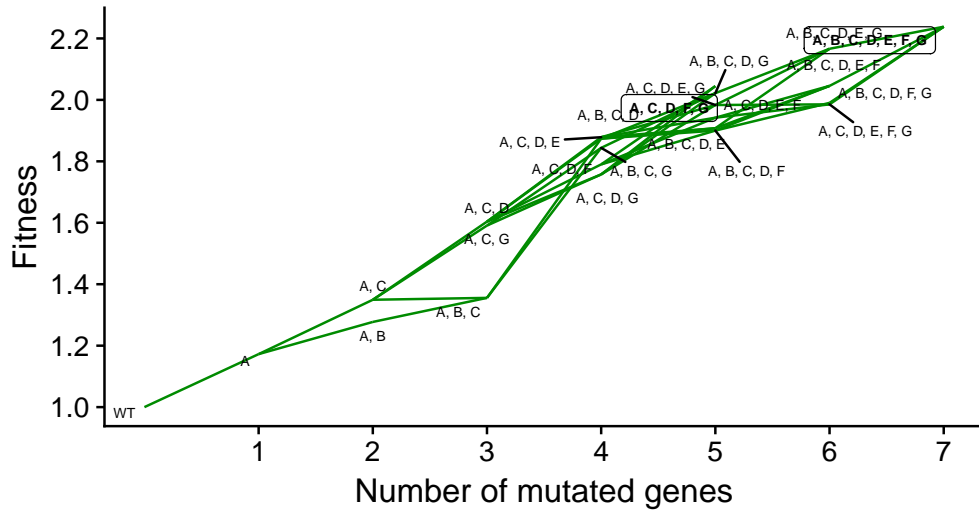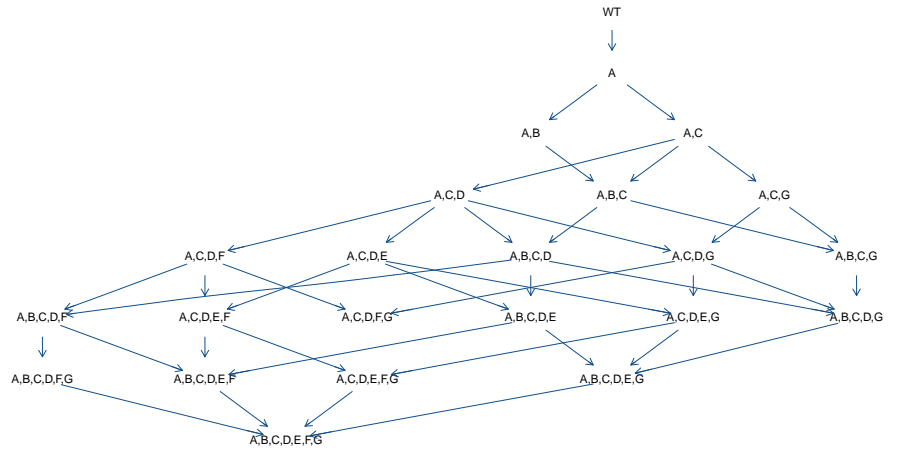

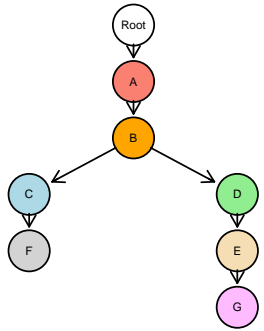

ID 5gEdOQwKmmjGCuW  
 acc genotypes 14  
 peaks no back 3  
 removed edges 4  
 prop rem edges 0.211

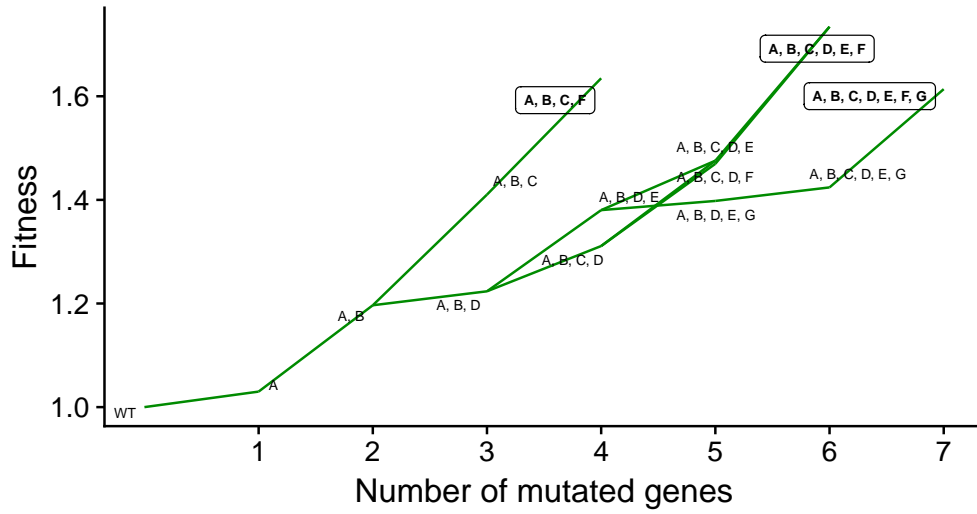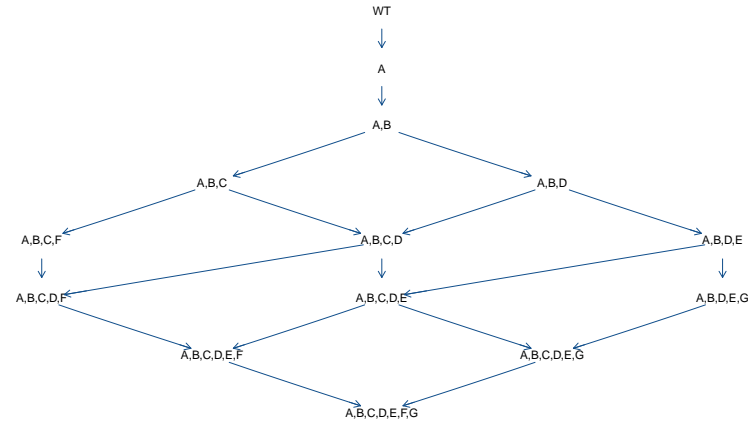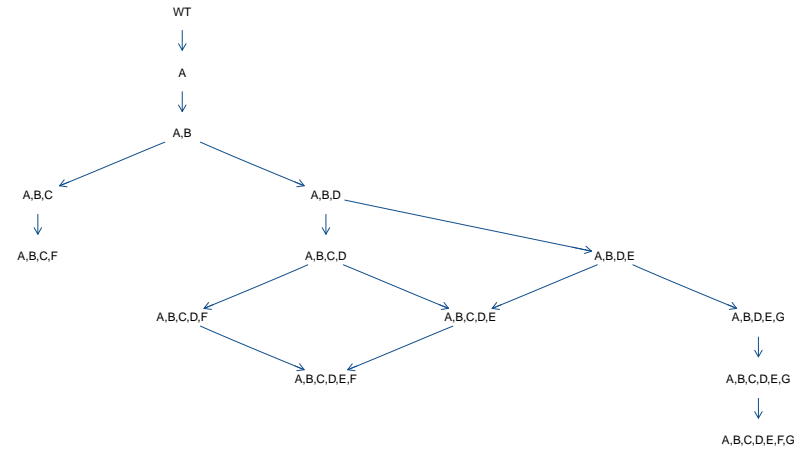

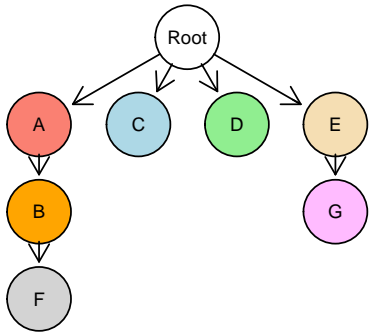

ID **5kZqKEOHzi10BWW78**  
 acc genotypes **48**  
 peaks no back **7**  
 removed edges **16**  
 prop rem edges **0.138**

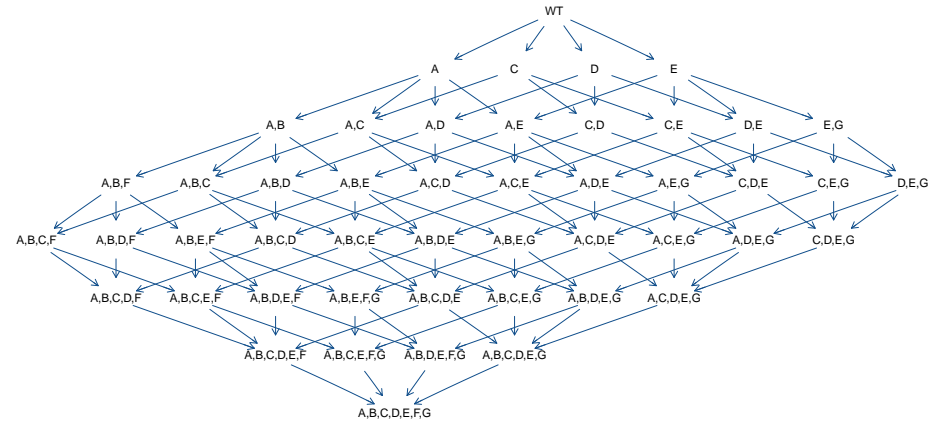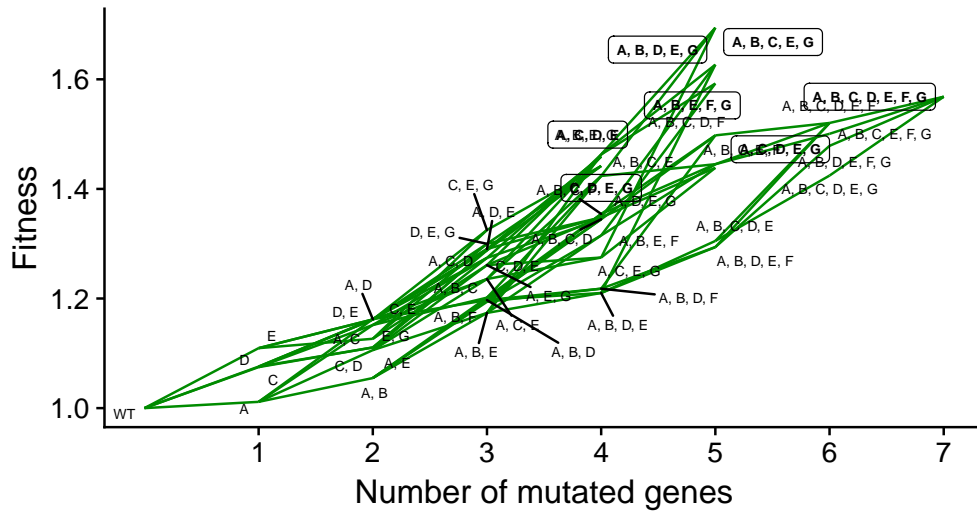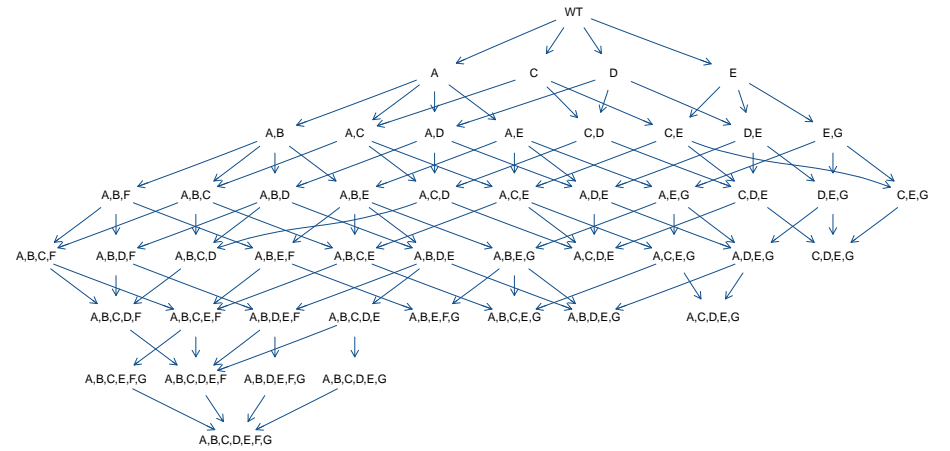



ID 6h4QpMCcKm22zn5f  
 acc genotypes 52  
 peaks no back 9  
 removed edges 31  
 prop rem edges 0.235

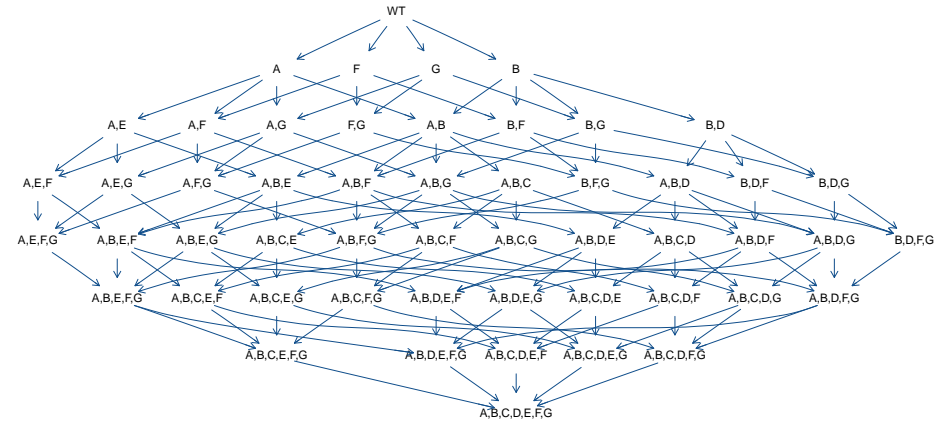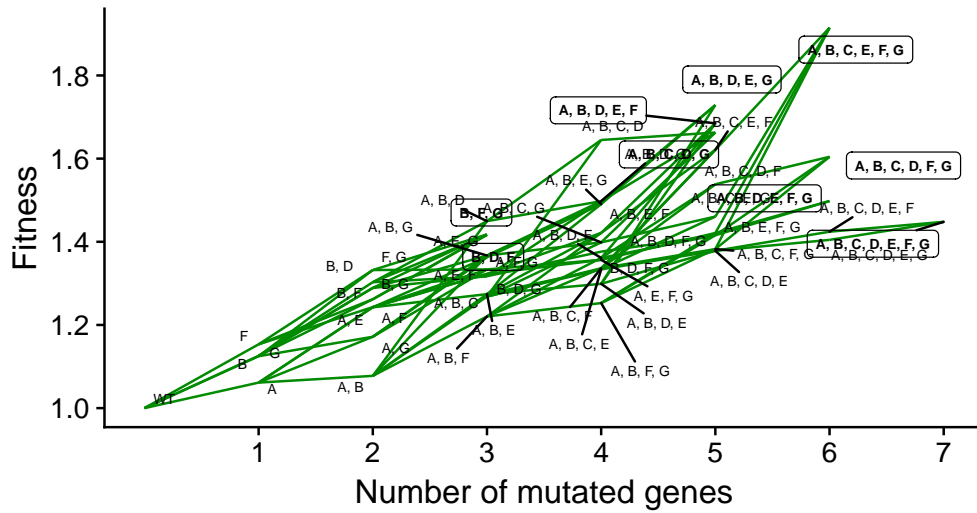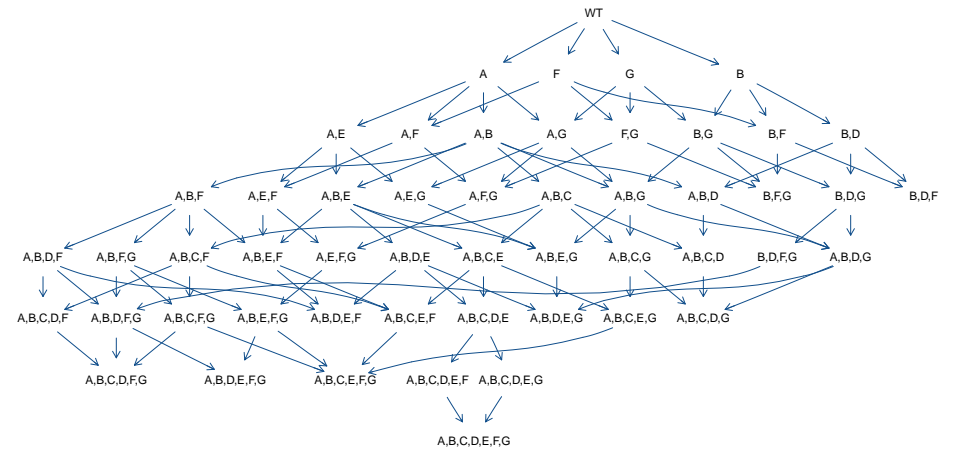

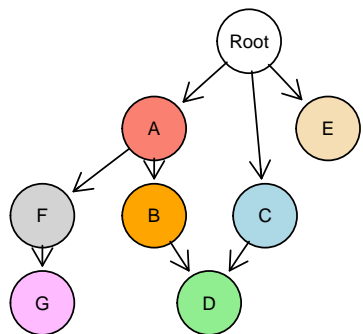

ID 6Hn6i2YqHUFLoALB  
 acc genotypes 34  
 peaks no back 5  
 removed edges 15  
 prop rem edges 0.205

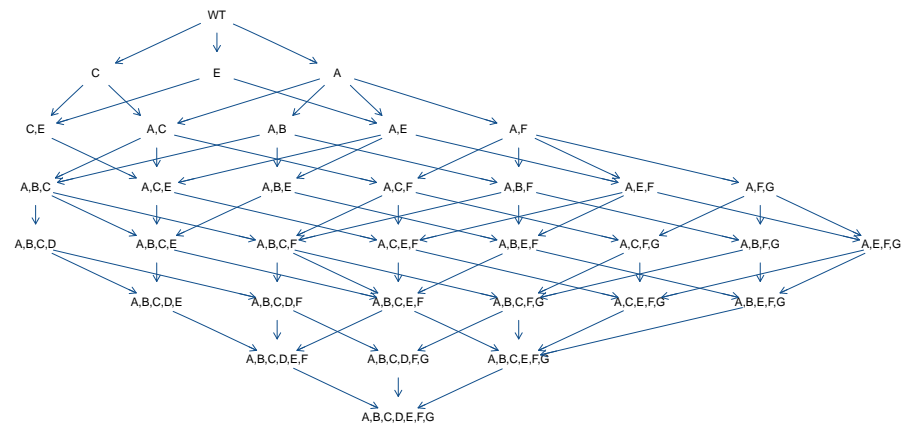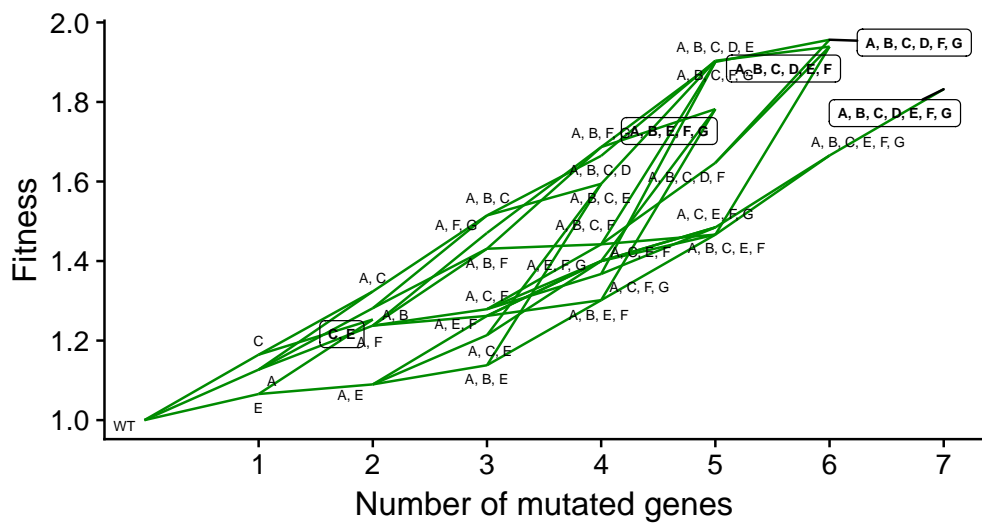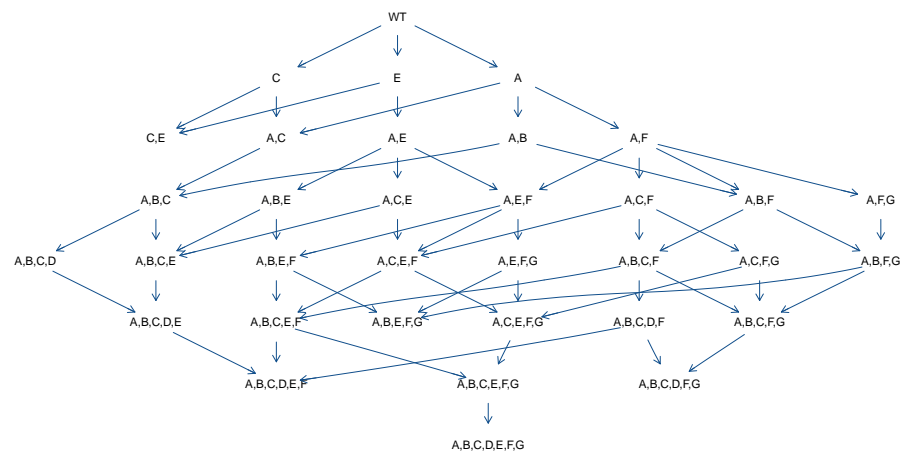

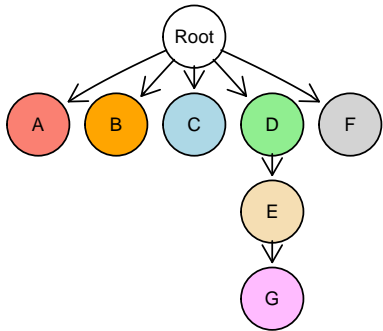

ID **6JONUdvaecCGnS7Y**  
 acc genotypes **64**  
 peaks no back **8**  
 removed edges **34**  
 prop rem edges **0.193**

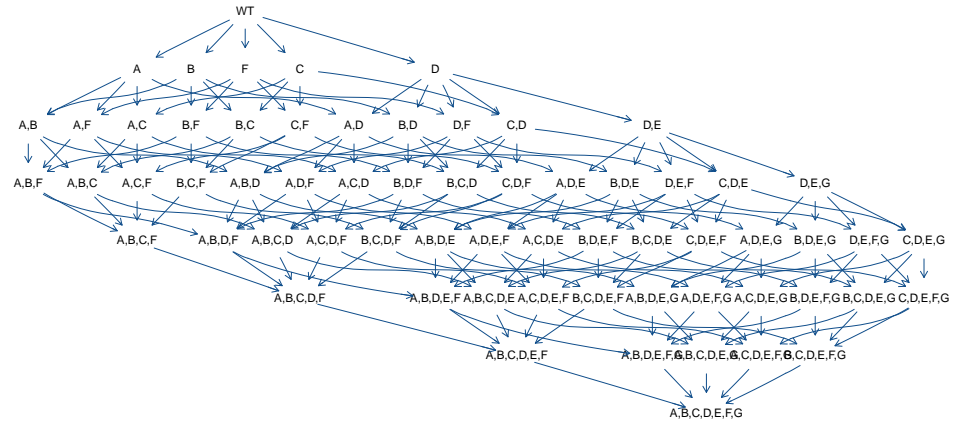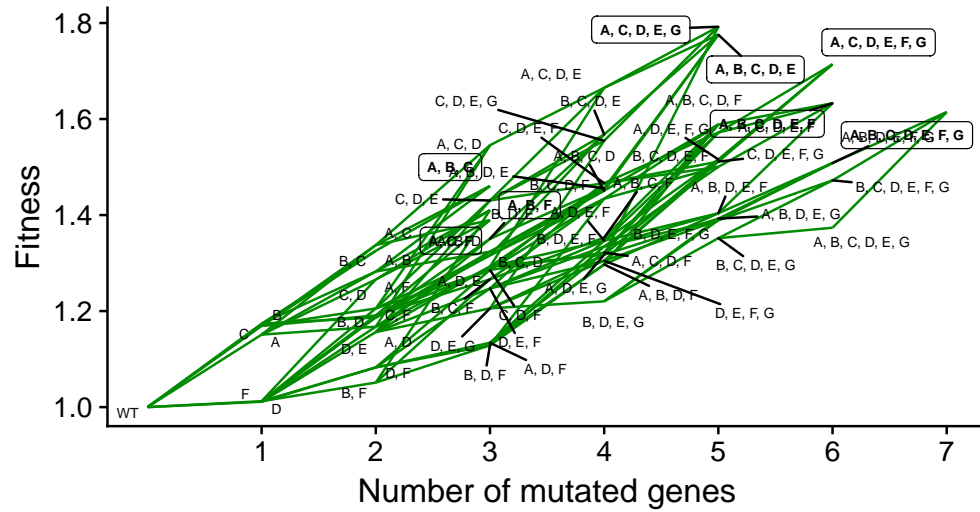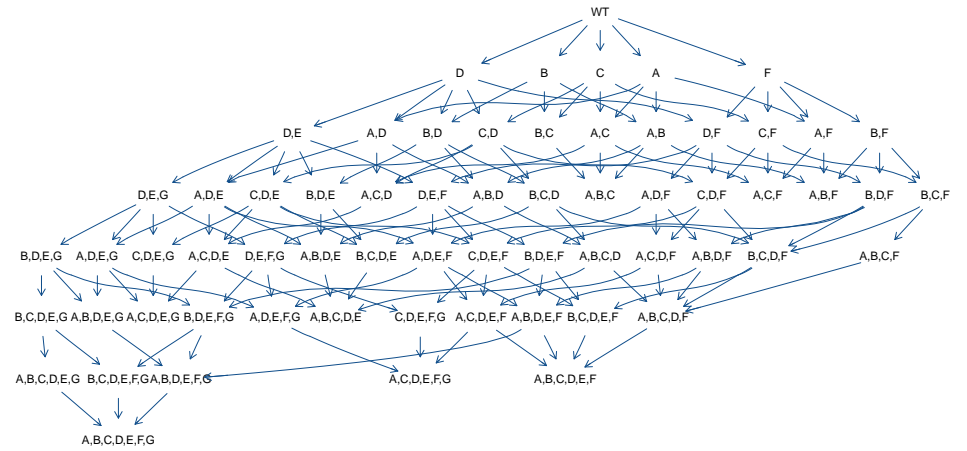



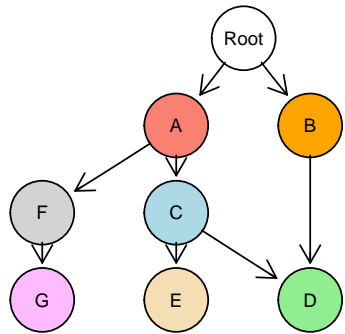

ID 6V3IXXX77zzMpl58  
 acc genotypes 26  
 peaks no back 2  
 removed edges 9  
 prop rem edges 0.184

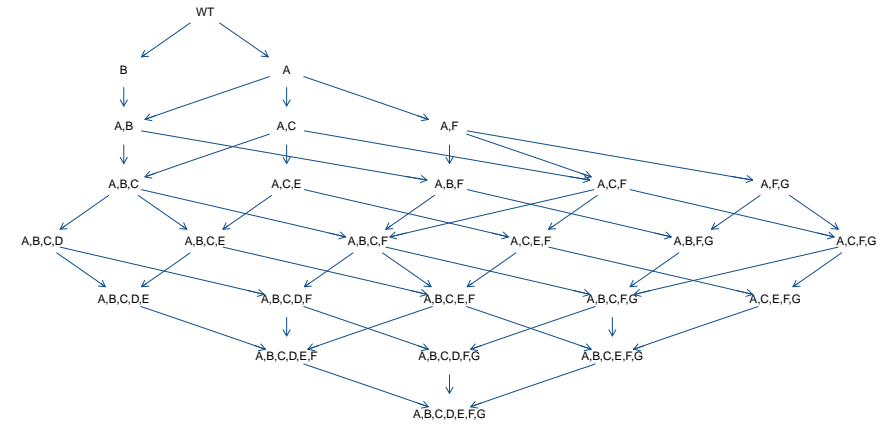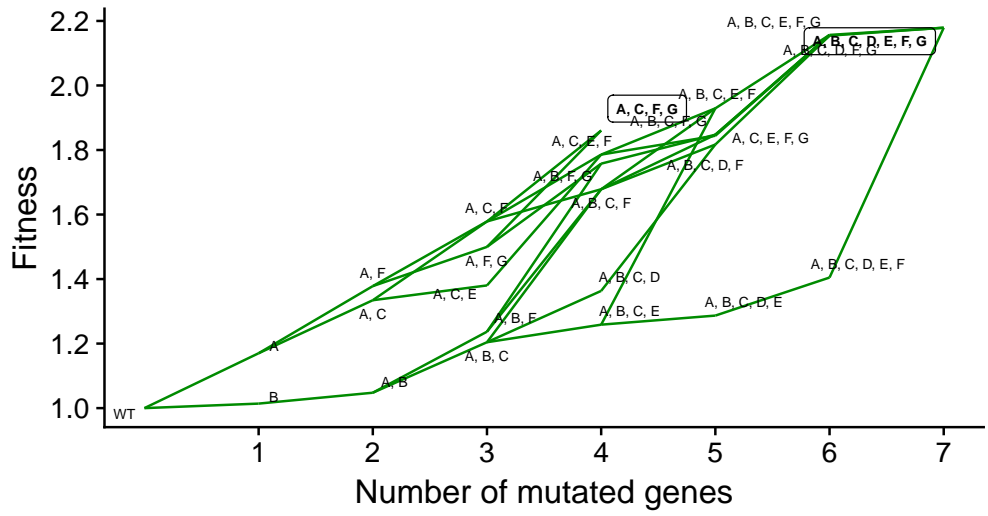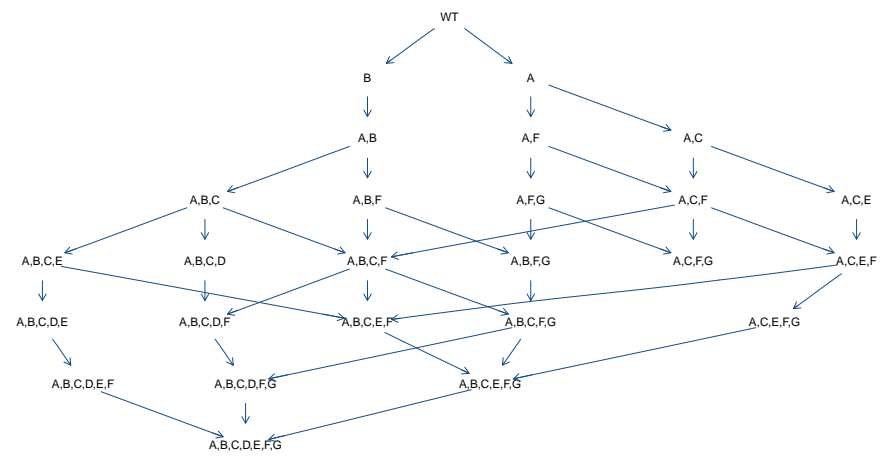

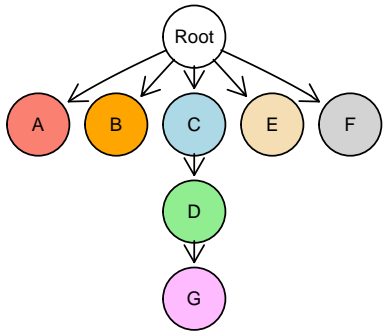

ID 738zqMpeBSiZXfez  
 acc genotypes 64  
 peaks no back 7  
 removed edges 26  
 prop rem edges 0.148

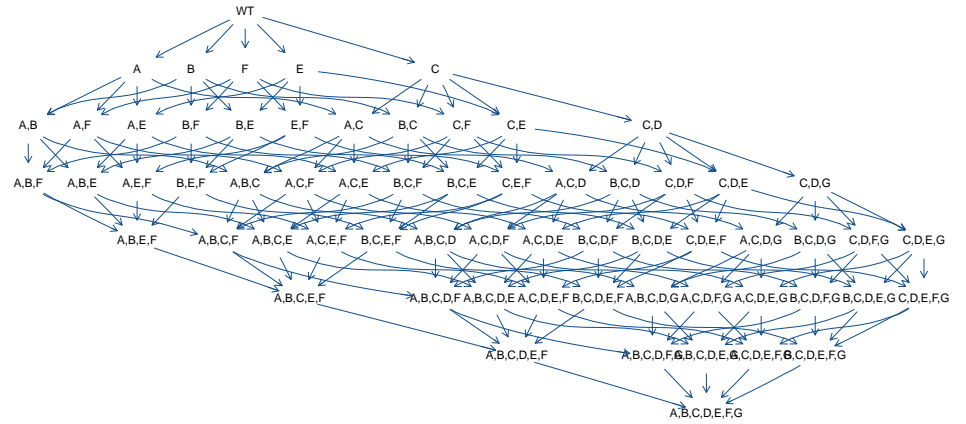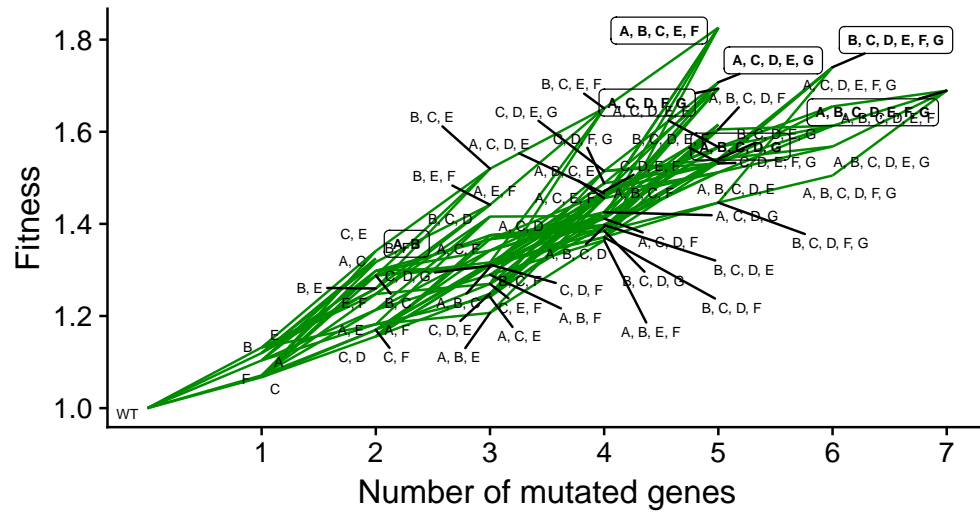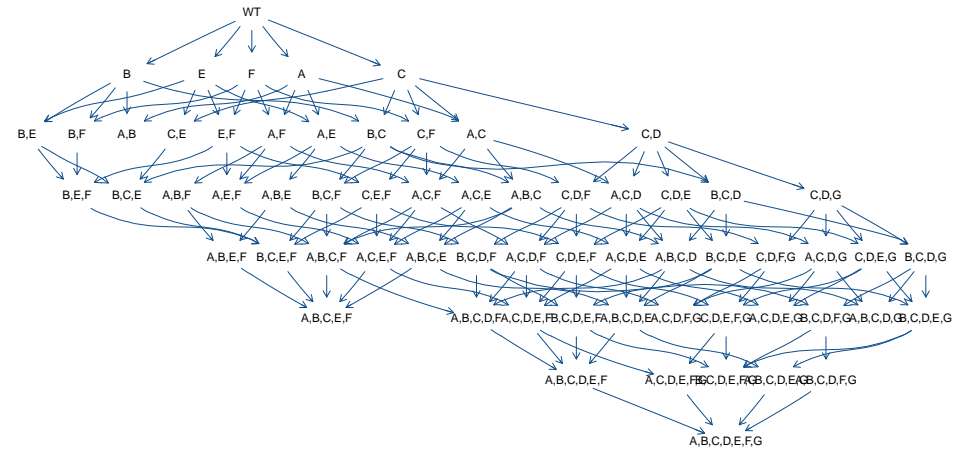

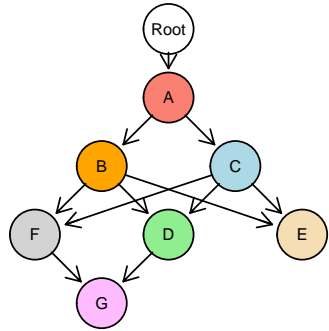

ID 7E10plyu7UguIU8I  
 acc genotypes 14  
 peaks no back 2  
 removed edges 1  
 prop rem edges 0.05

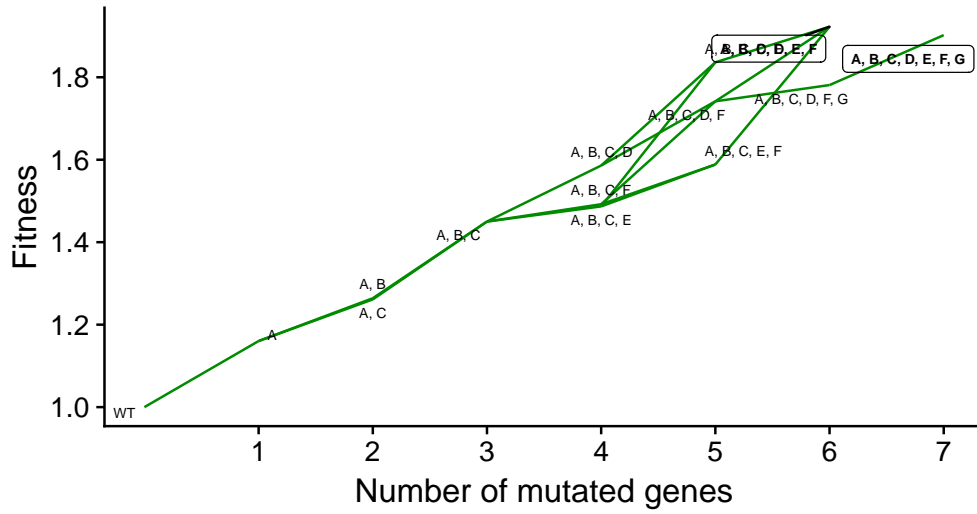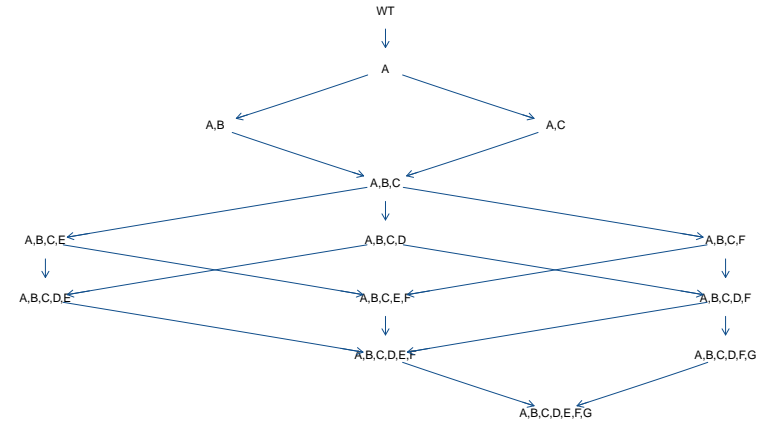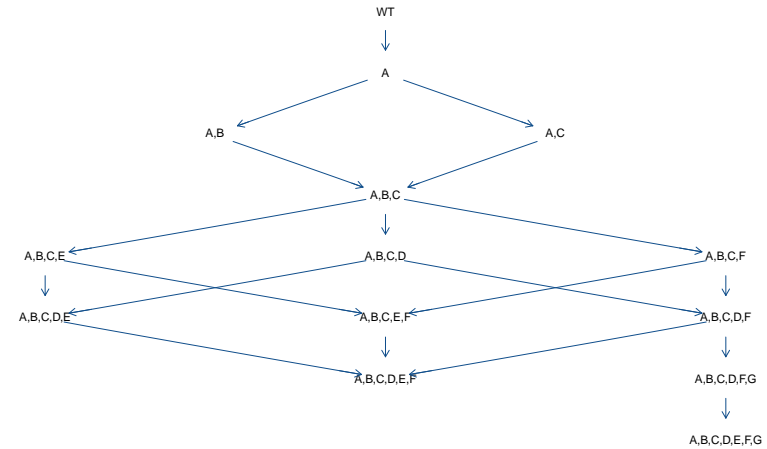

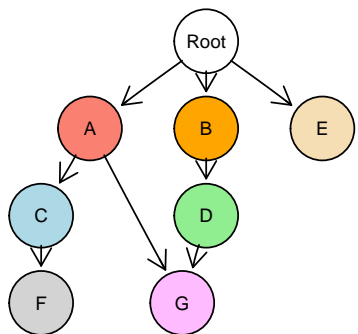

ID 7L5tLW7iVItNxTJ6  
 acc genotypes 30  
 peaks no back 6  
 removed edges 14  
 prop rem edges 0.237

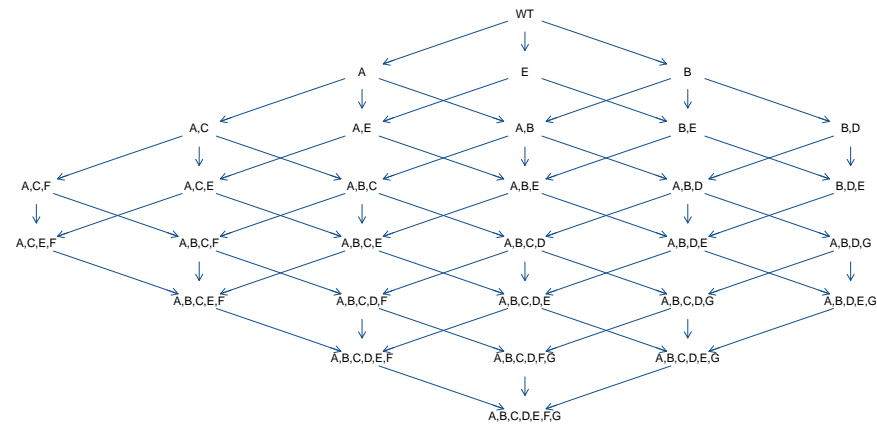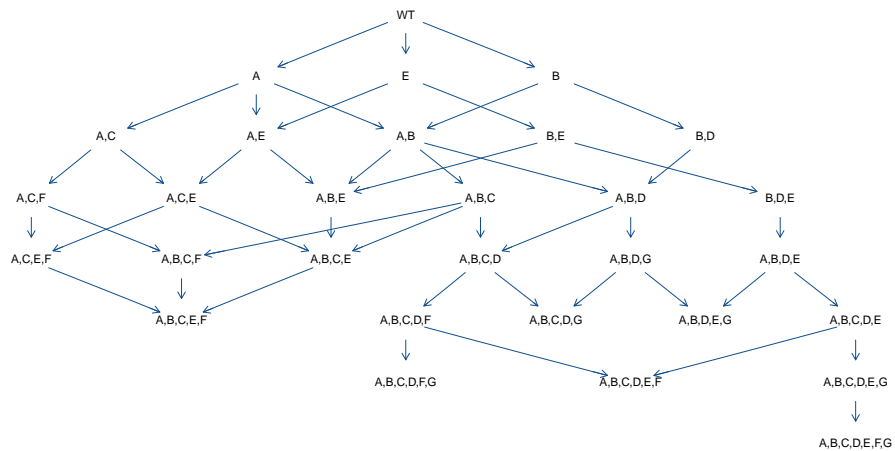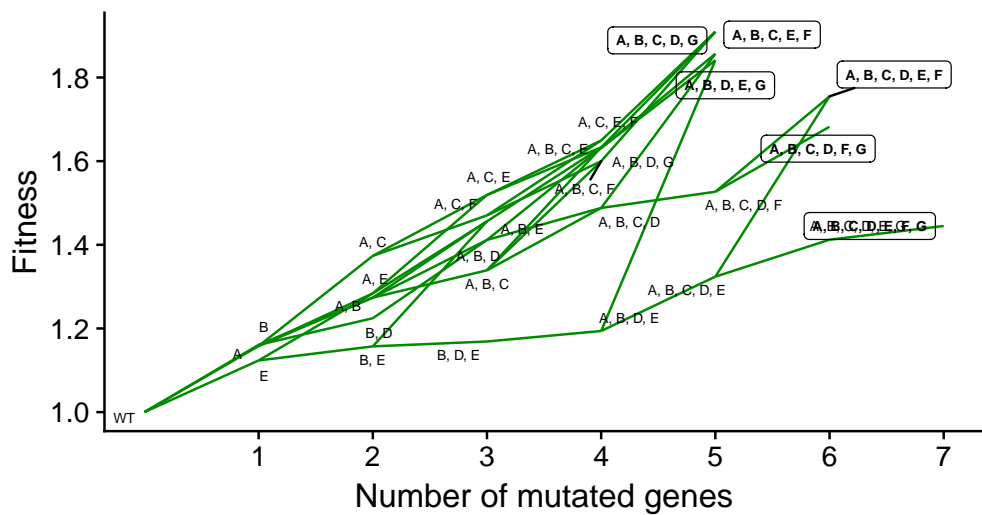



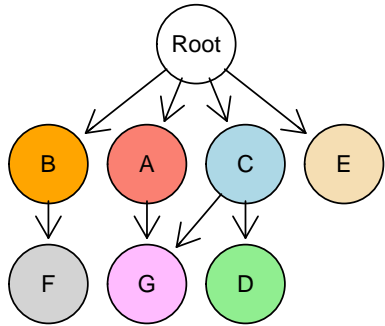

ID 7N9Bf18TzdbZ2zab  
 acc genotypes 48  
 peaks no back 6  
 removed edges 24  
 prop rem edges 0.207

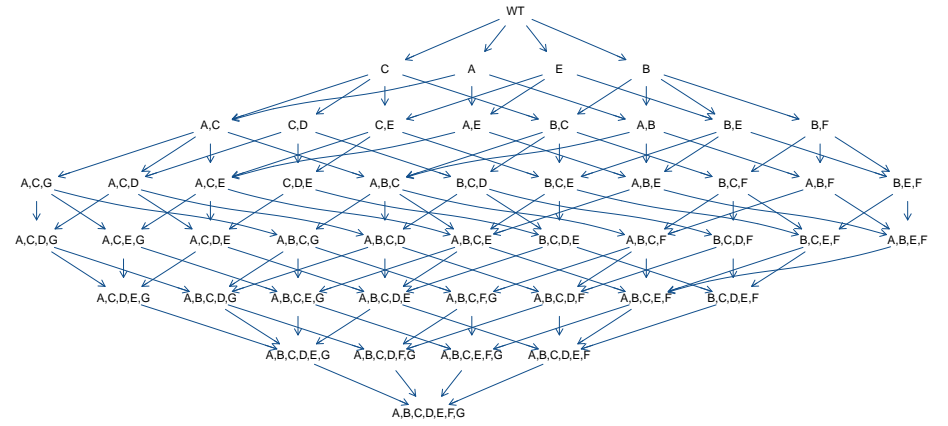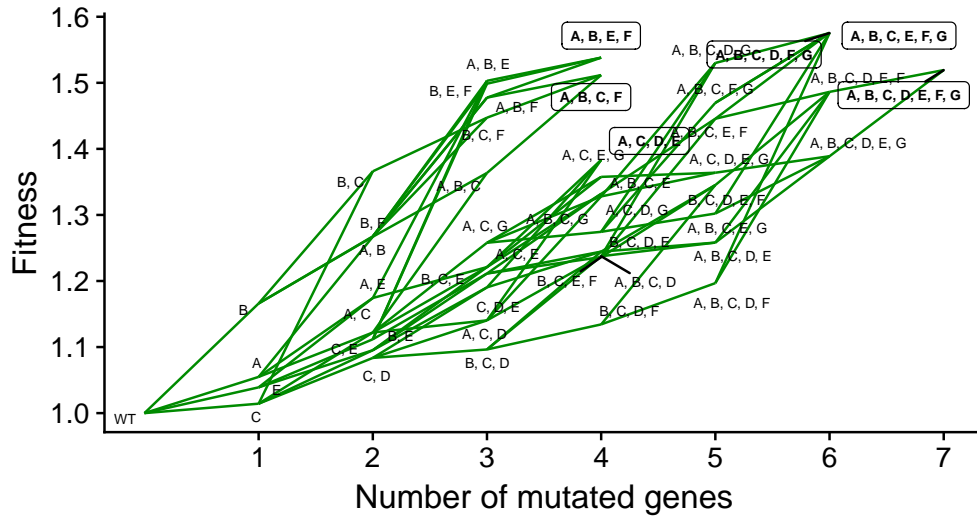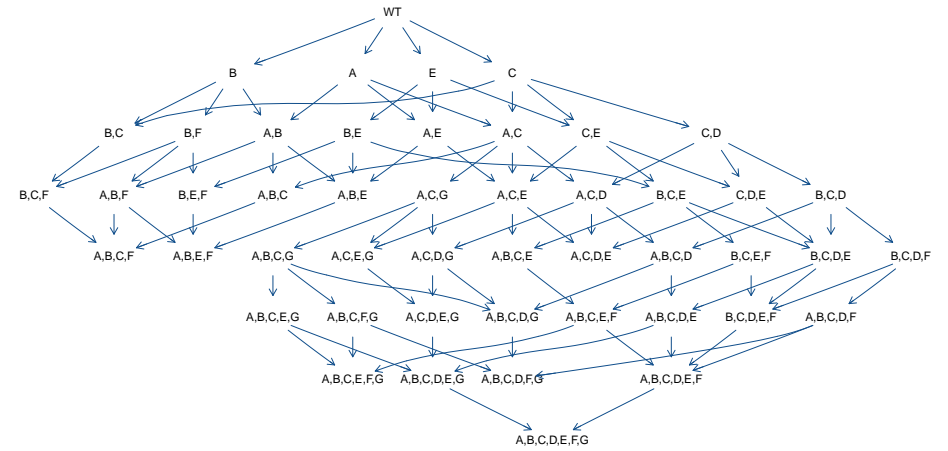

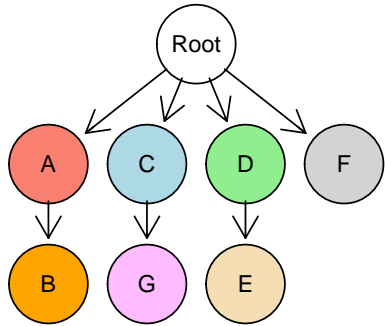

ID 7wKXobmcjD38LD6b  
 acc genotypes 54  
 peaks no back 8  
 removed edges 29  
 prop rem edges 0.215

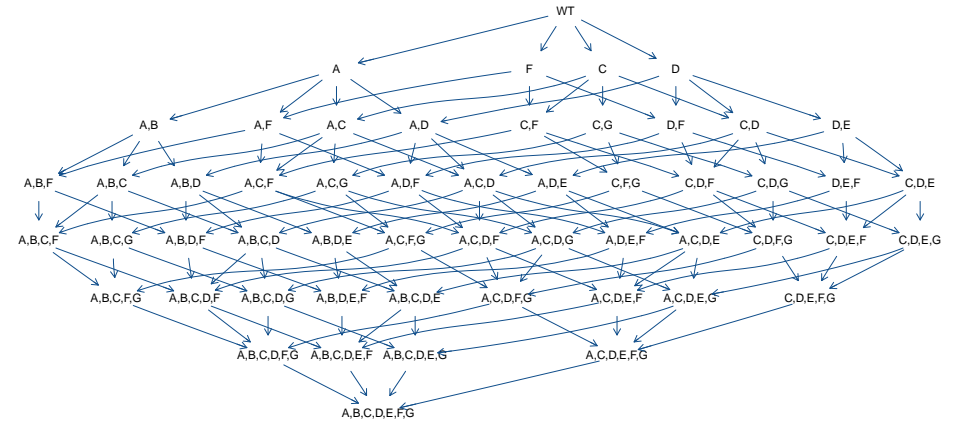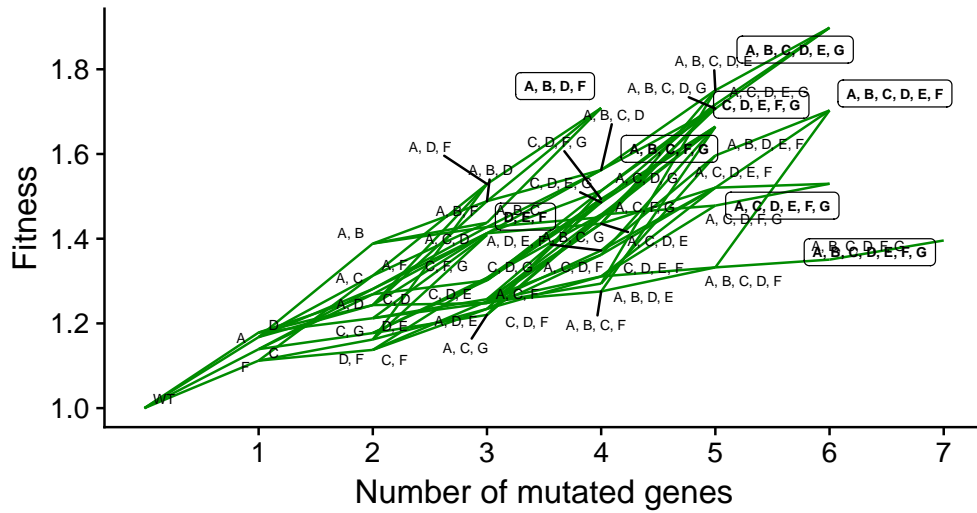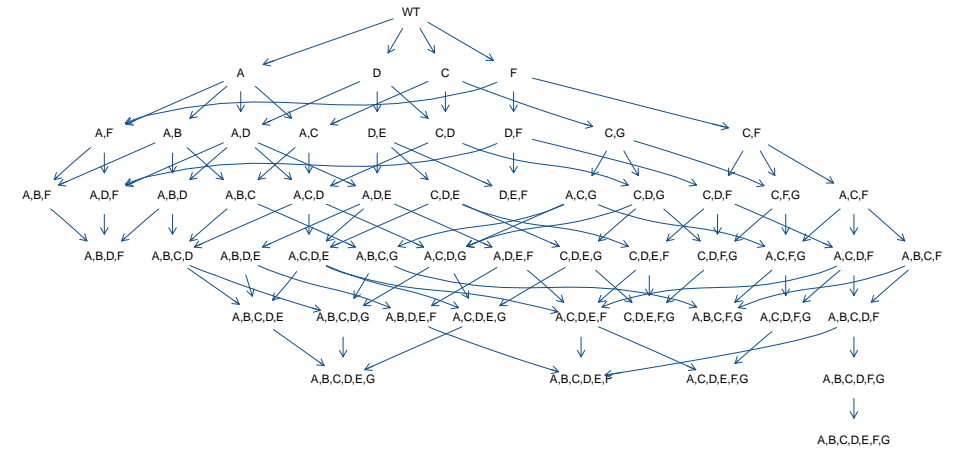

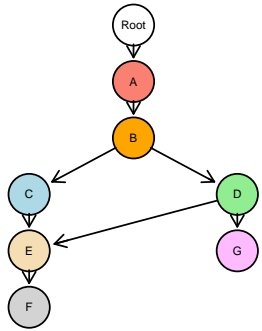

ID 8jUIKcUqRbPGoMif  
 acc genotypes 12  
 peaks no back 3  
 removed edges 2  
 prop rem edges 0.133

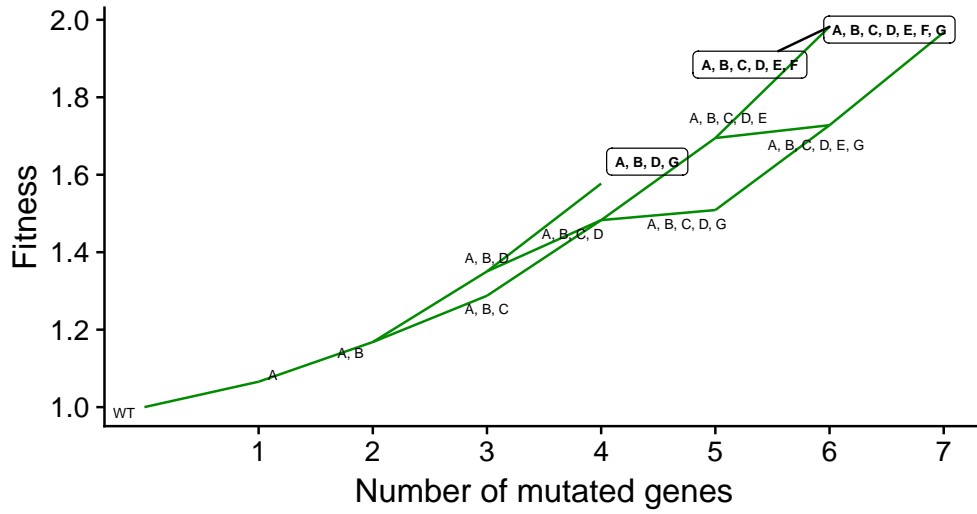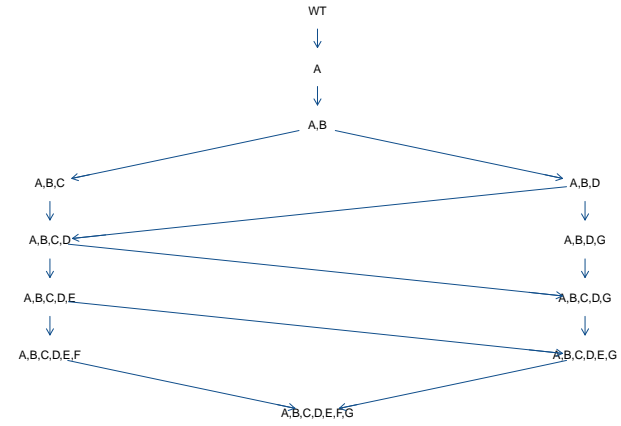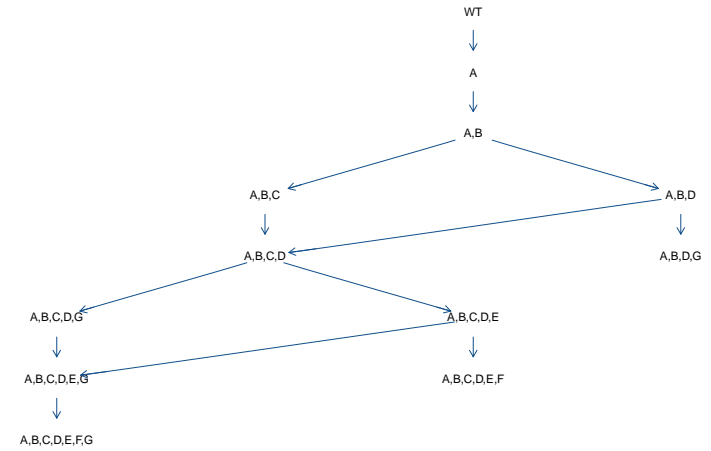



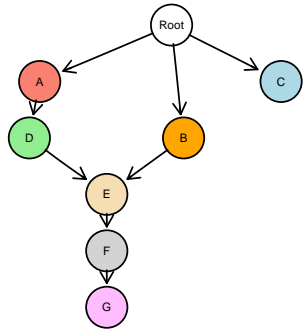

ID **8mSMIsAi8LuLuzZC**  
 acc genotypes **18**  
 peaks no back 4  
 removed edges 4  
 prop rem edges 0.138

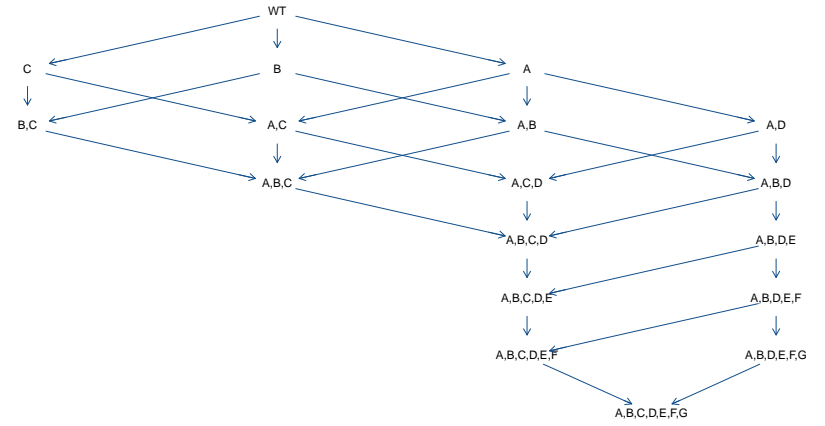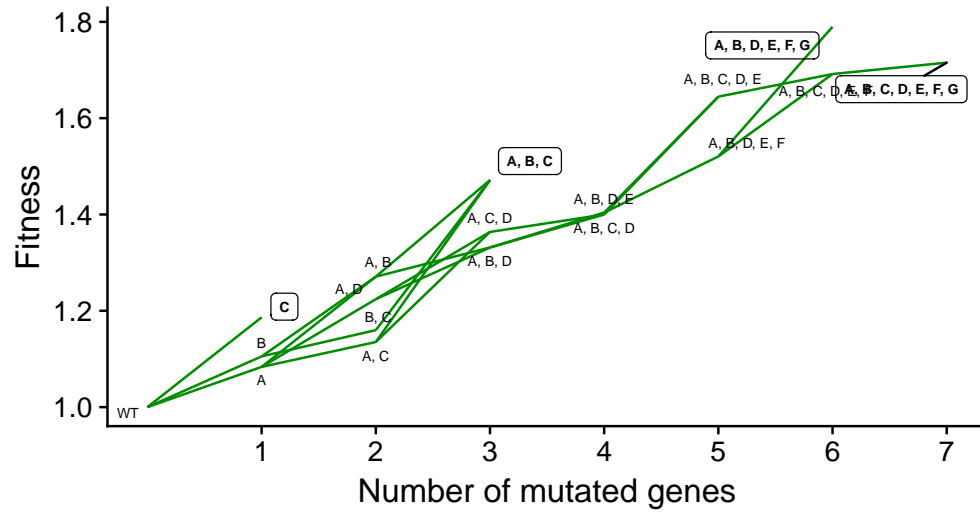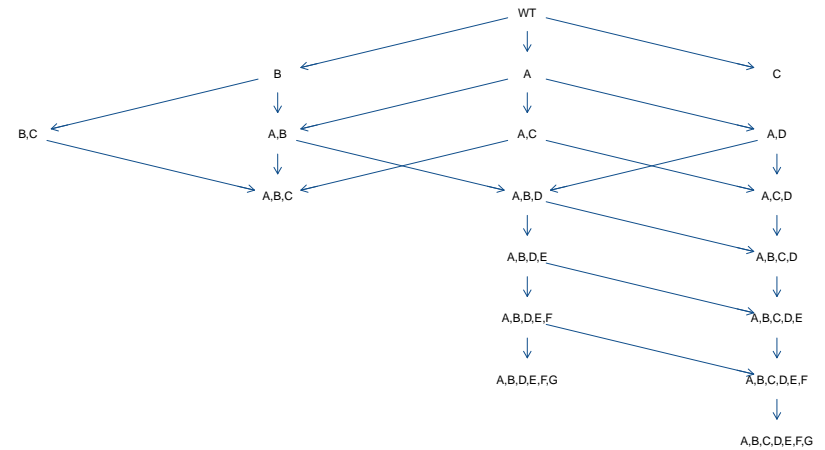

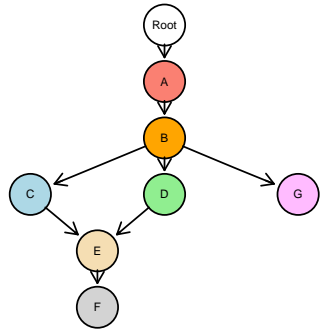

ID 8QIFQCUIUVIC10PZr  
 acc genotypes 14  
 peaks no back 2  
 removed edges 1  
 prop rem edges 0.05

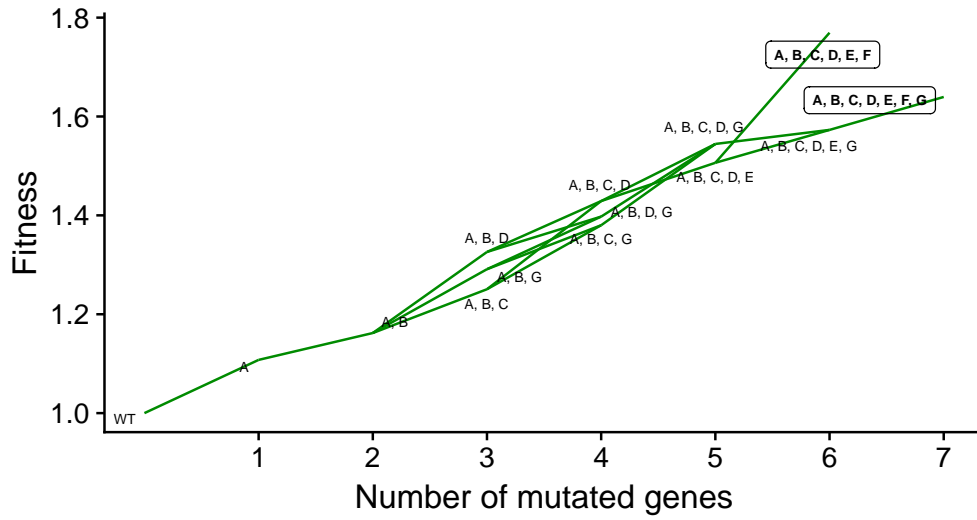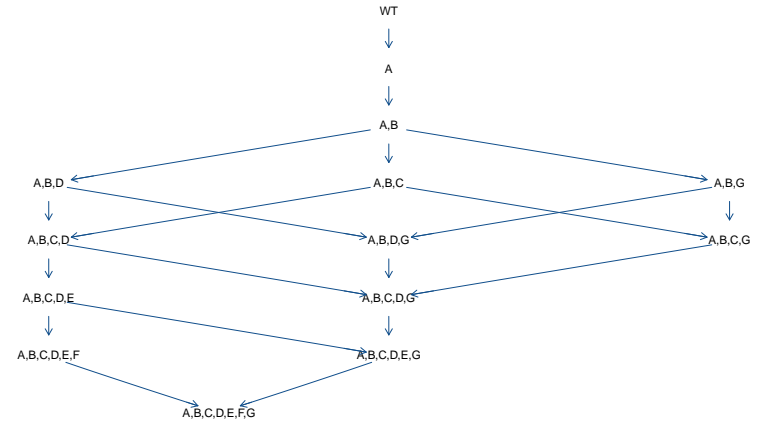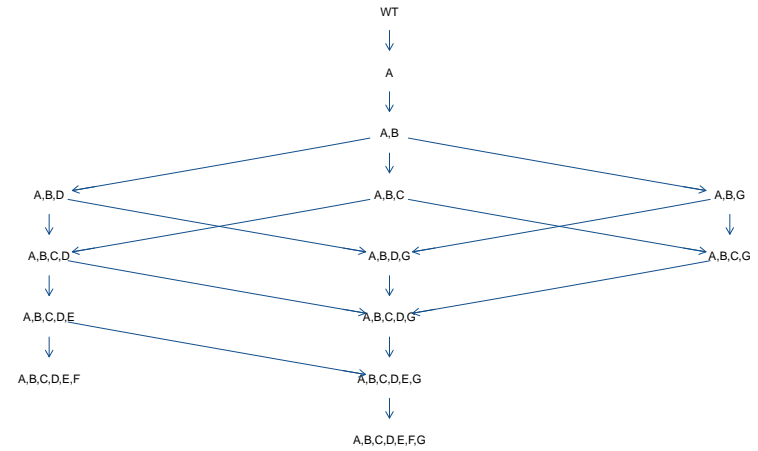

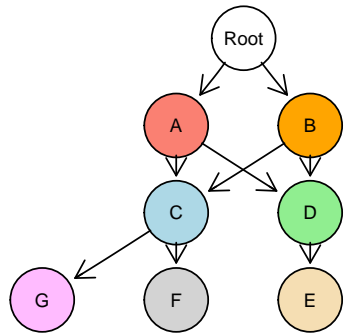

ID 8u1FzrFscU1z8xqB  
 acc genotypes 18  
 peaks no back 4  
 removed edges 3  
 prop rem edges 0.103

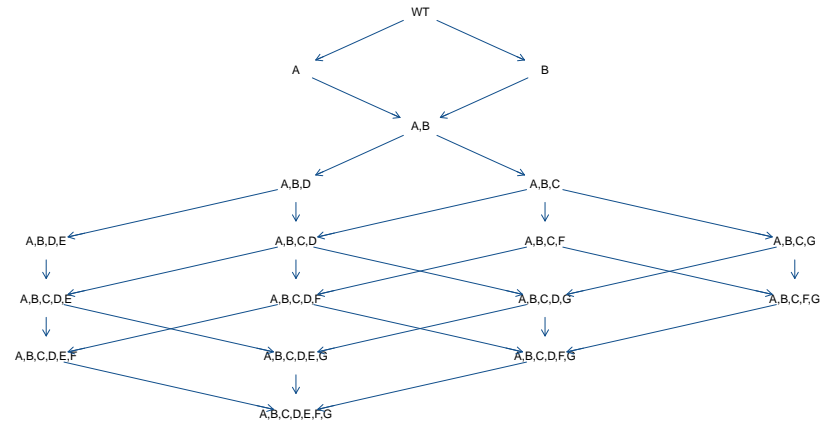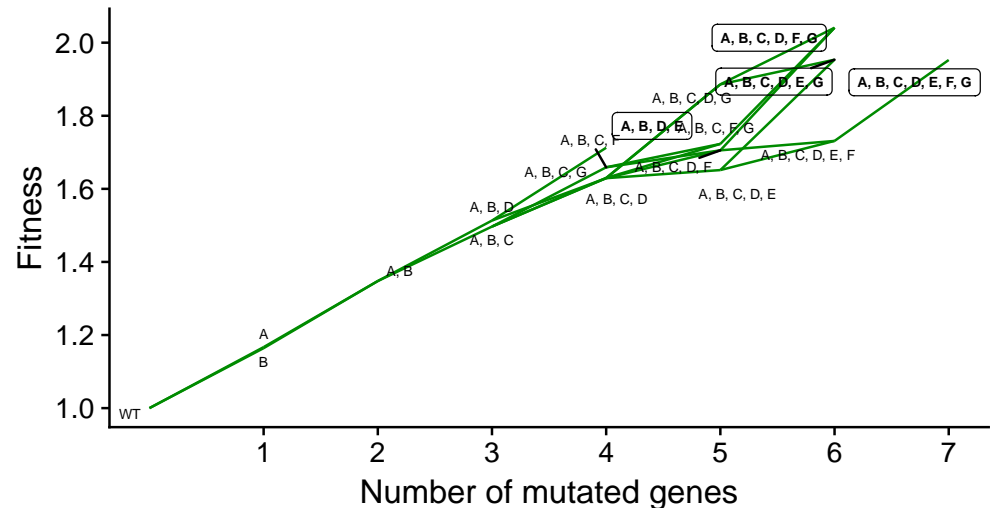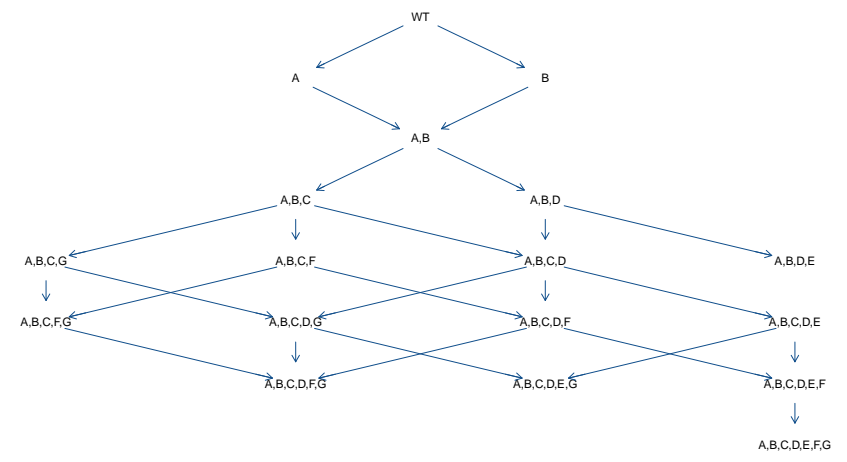

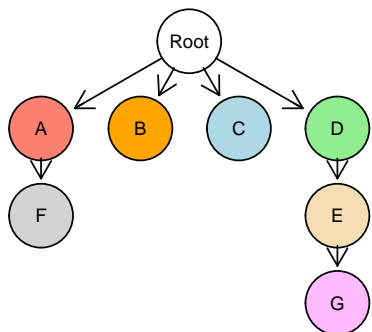

ID 9INXHxuzCY7gqqs  
 acc genotypes 48  
 peaks no back 6  
 removed edges 26  
 prop rem edges 0.224

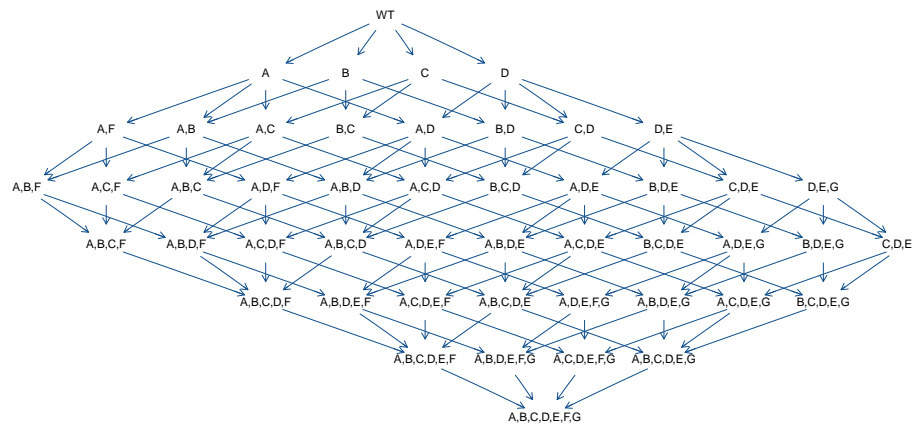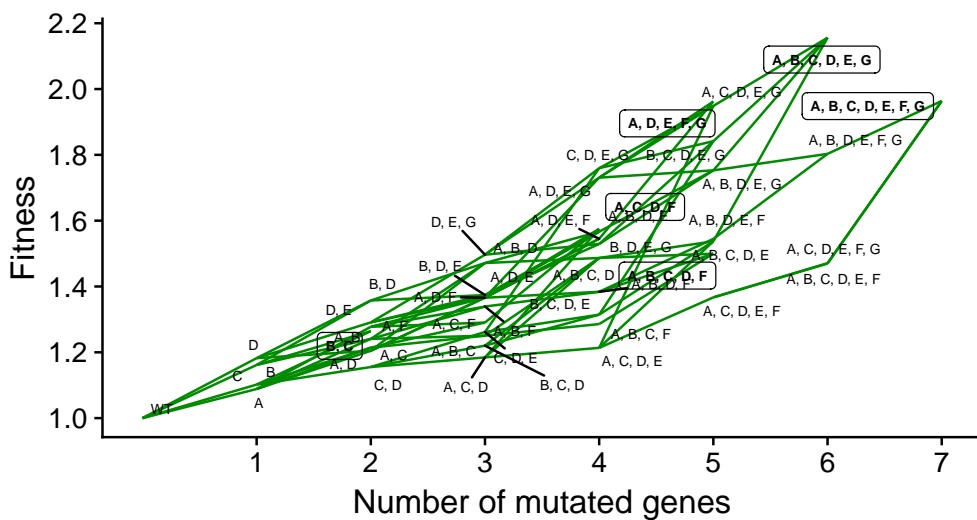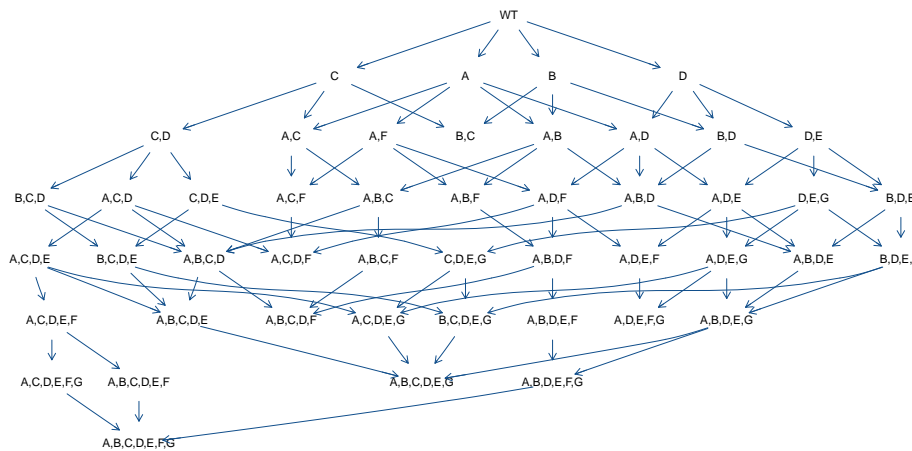

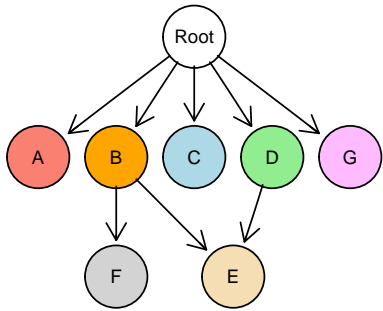

ID [9p9QxtT6PhU5iRpy](#)  
 acc genotypes 64  
 peaks no back 9  
 removed edges 37  
 prop rem edges 0.21

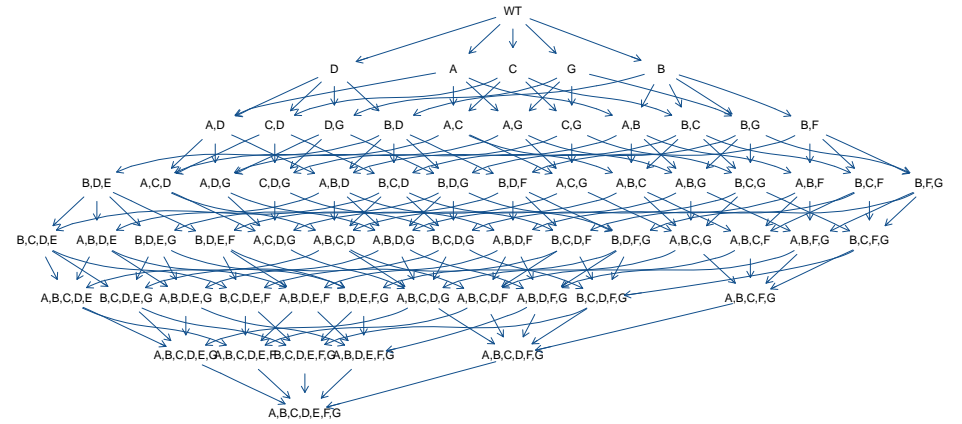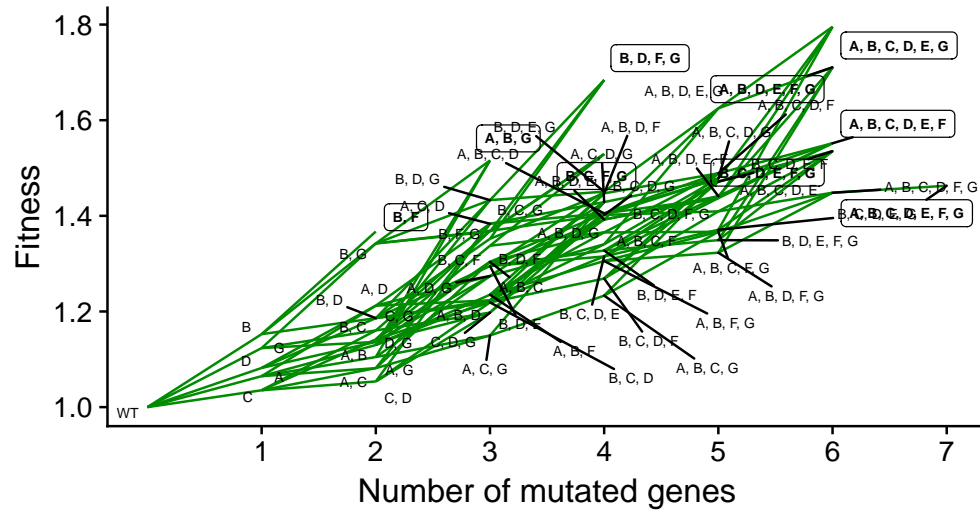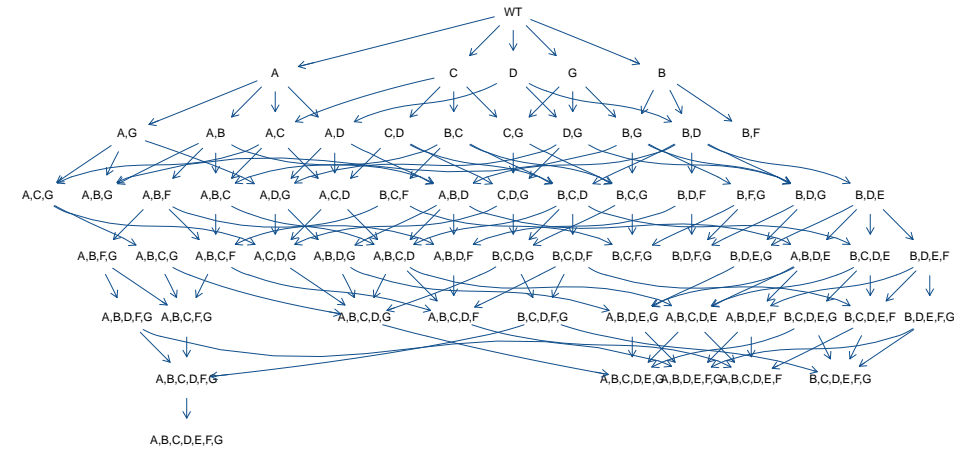

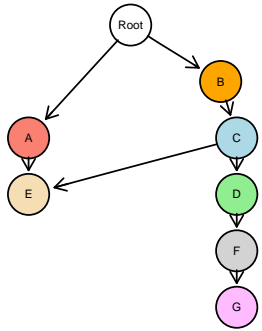

ID 9xXGITgcqHNk6QAO  
 acc genotypes 16  
 peaks no back 4  
 removed edges 4  
 prop rem edges 0.174

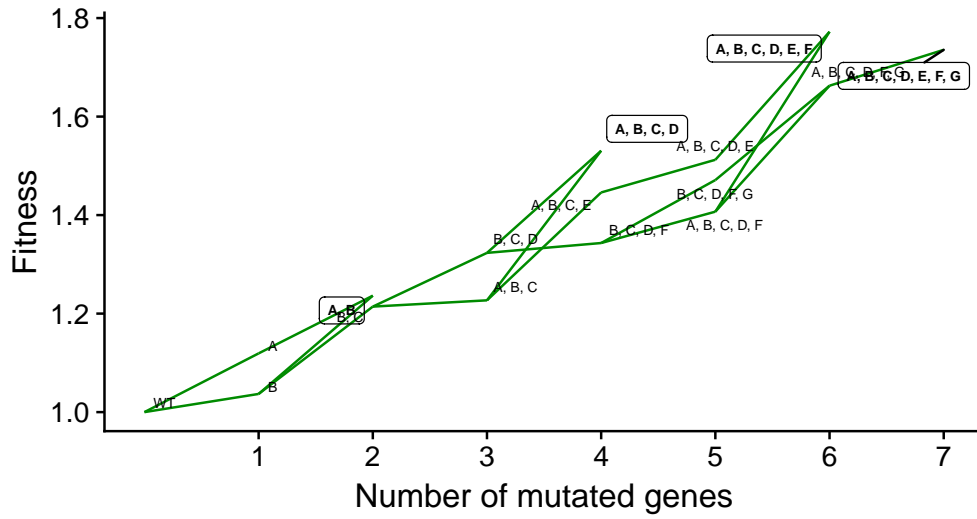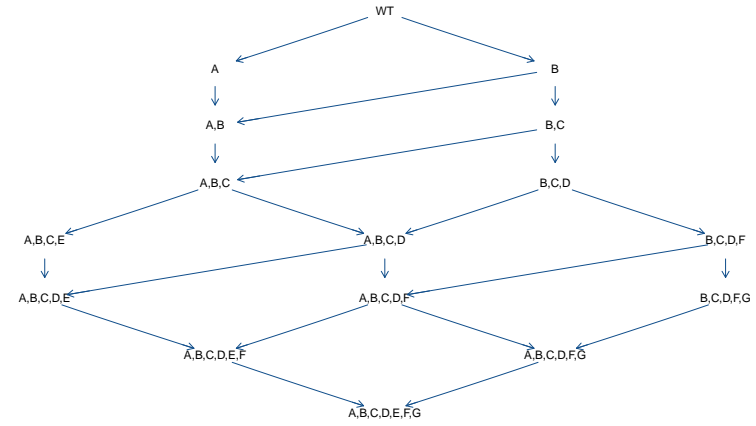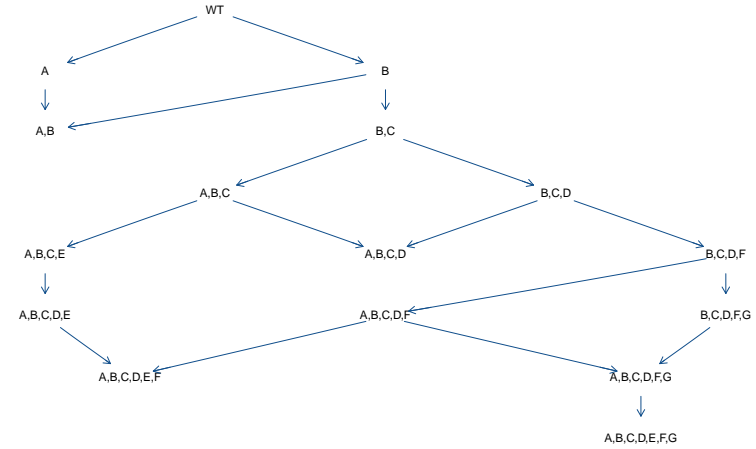

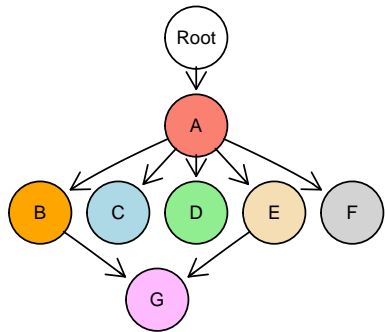

ID [9yJVB9KVObV7syFm](#)  
 acc genotypes 41  
 peaks no back 6  
 removed edges 16  
 prop rem edges 0.158

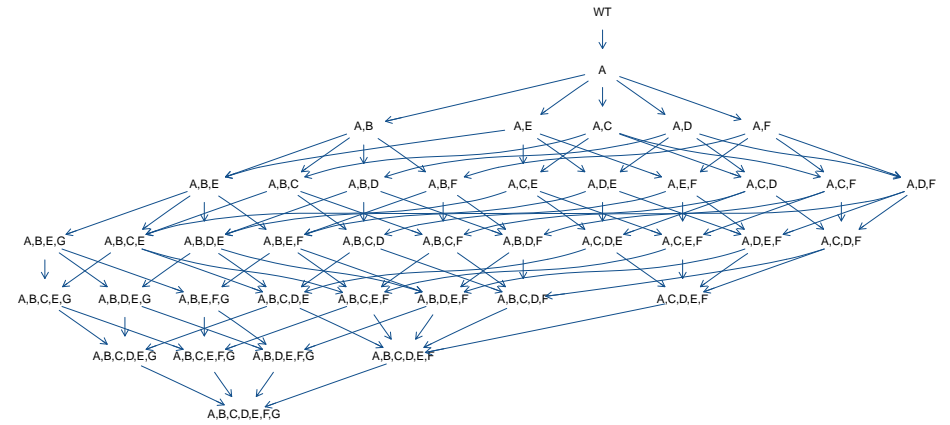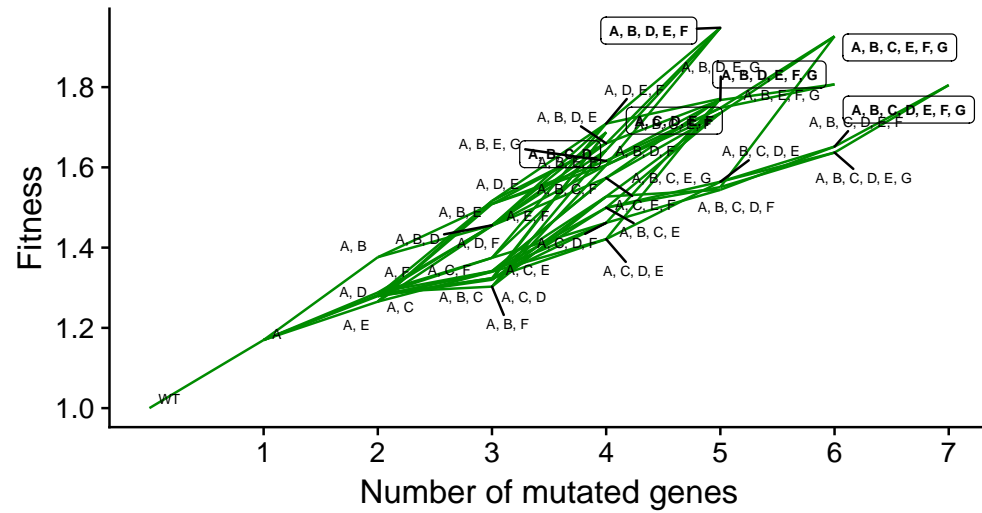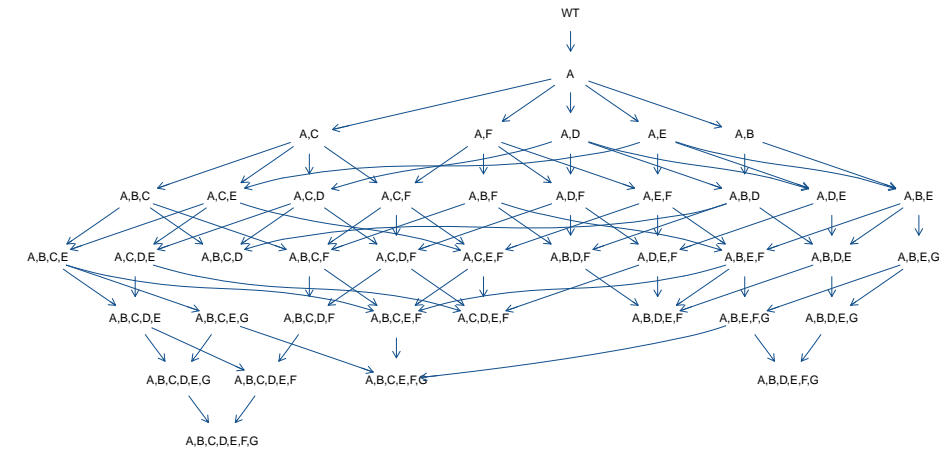

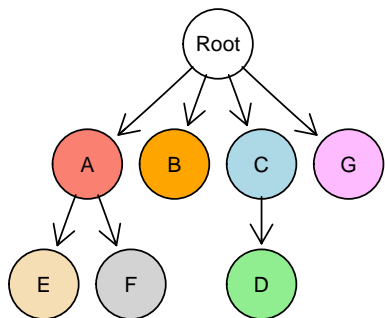

ID a71ZIUjjTtaY98zg  
 acc genotypes 60  
 peaks no back 7  
 removed edges 21  
 prop rem edges 0.131

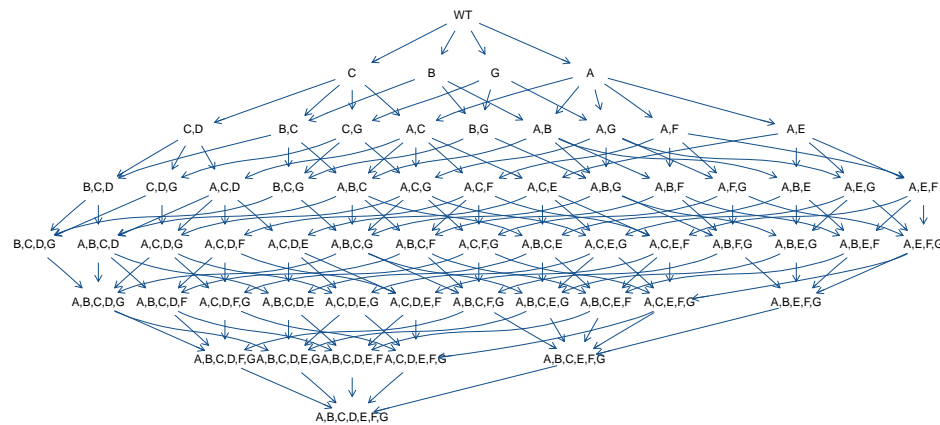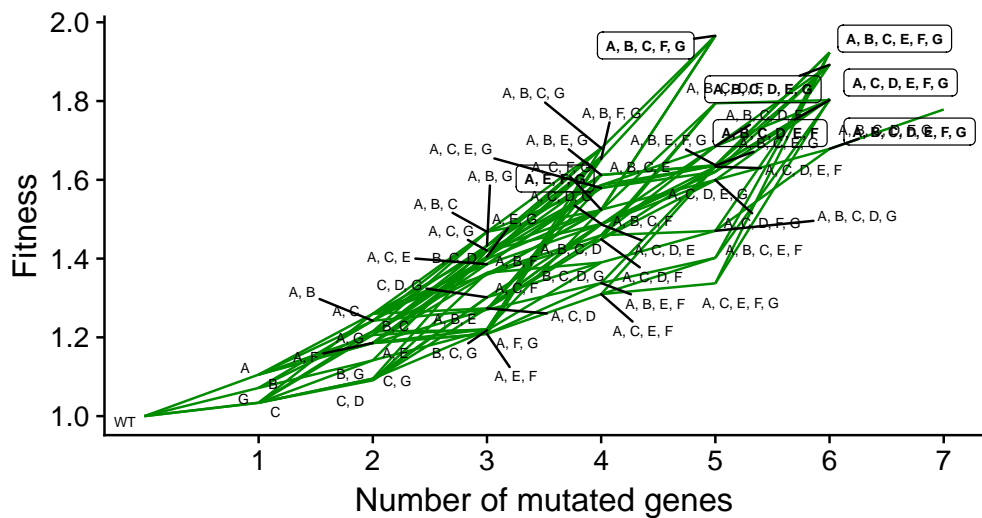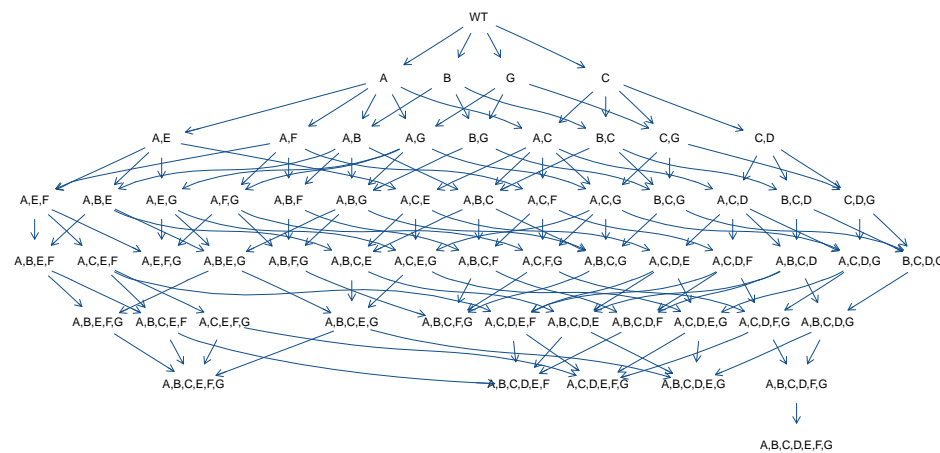



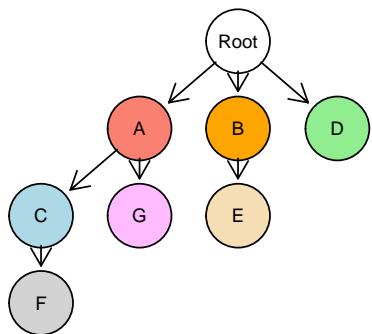

ID **aABp8Hfk3fLTx4co**  
 acc genotypes **42**  
 peaks no back **7**  
 removed edges **17**  
 prop rem edges **0.175**

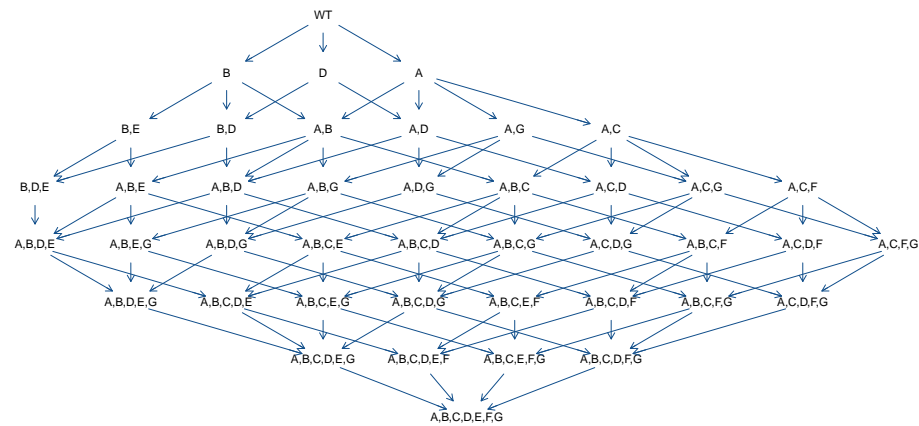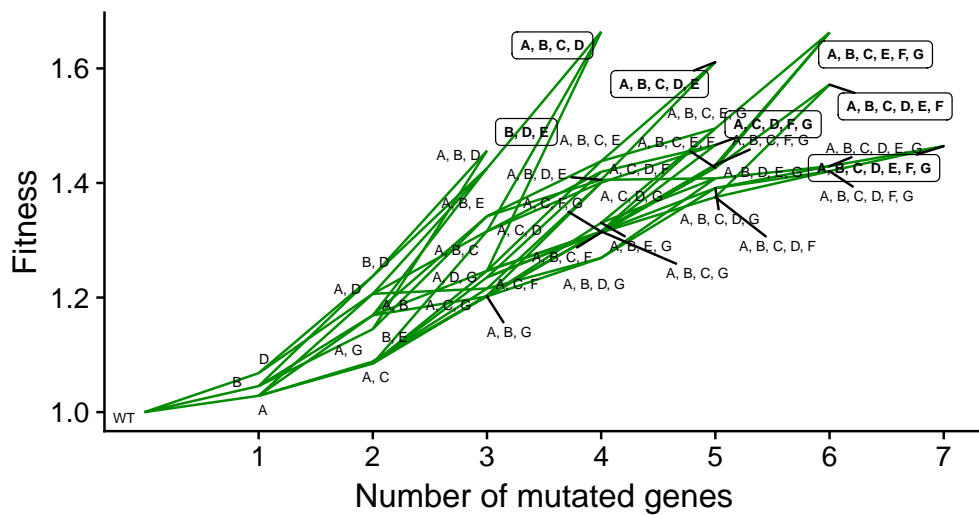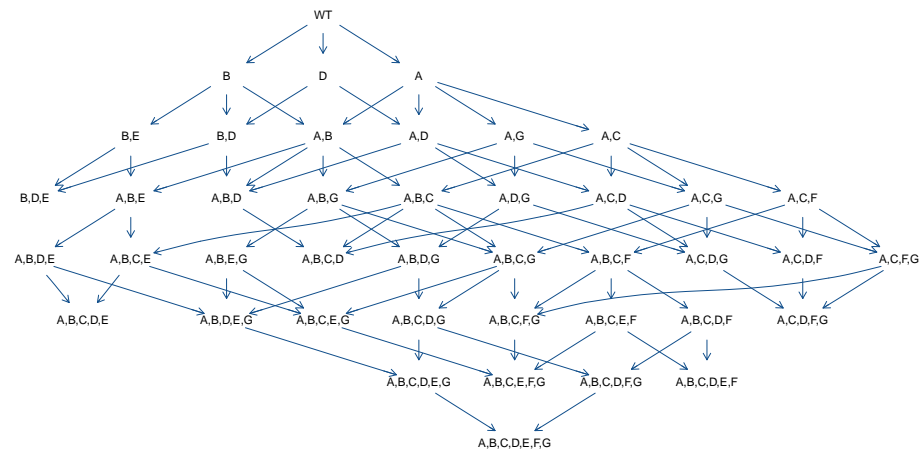

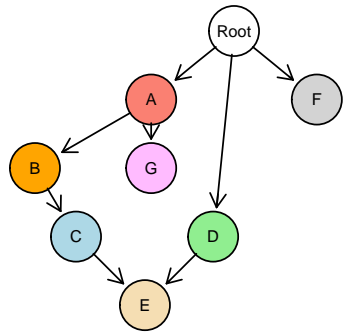

ID AeBhYdSJ32SlaHgW  
 acc genotypes 32  
 peaks no back 3  
 removed edges 8  
 prop rem edges 0.118

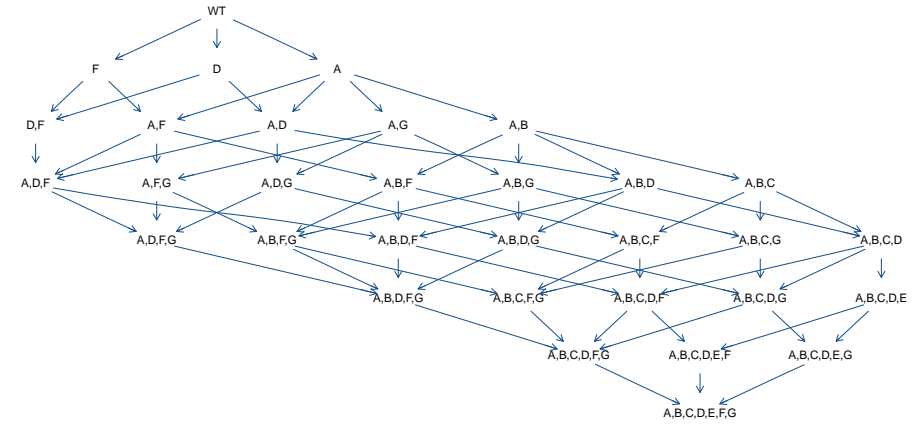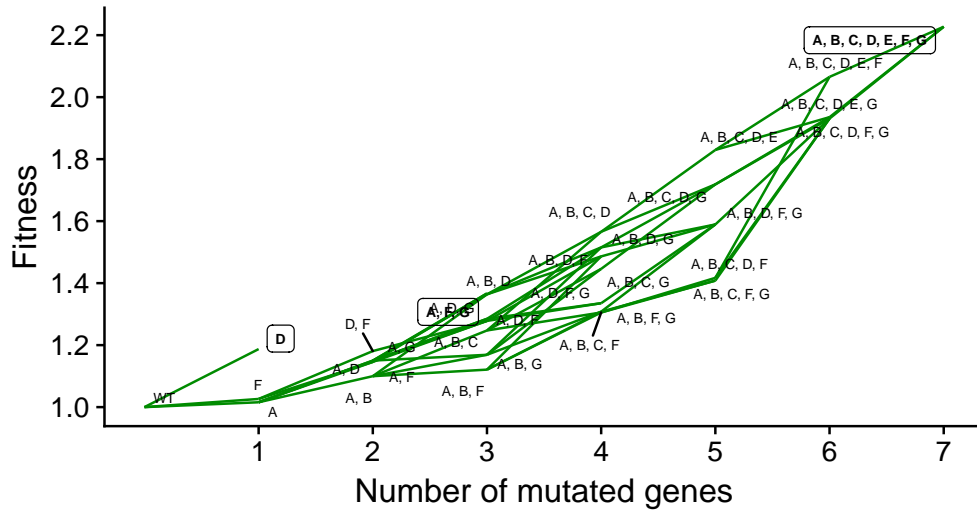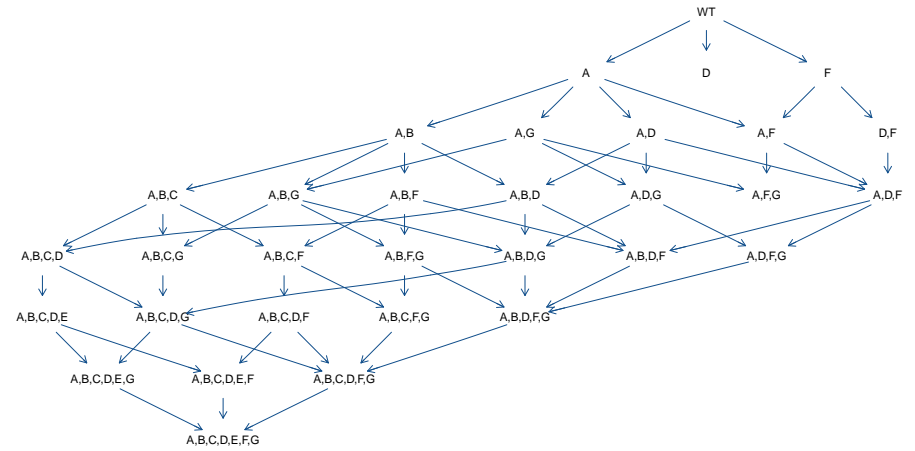



ID **ANTtoA35KKWUX10uQ**  
 acc genotypes **25**  
 peaks no back **3**  
 removed edges **5**  
 prop rem edges **0.106**

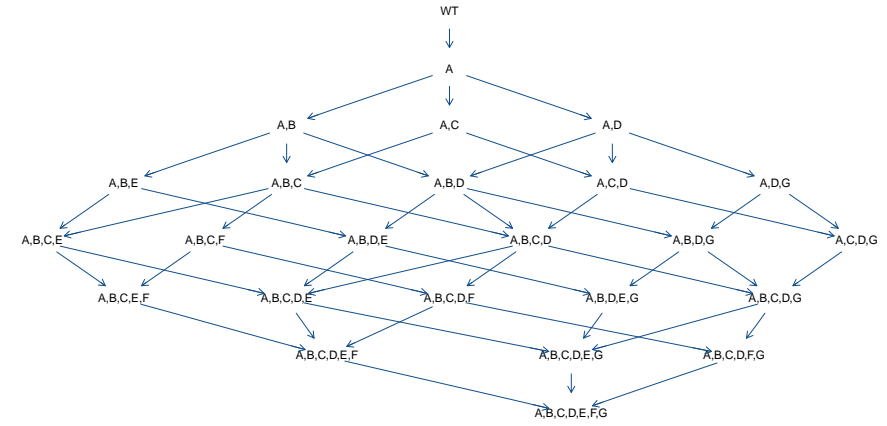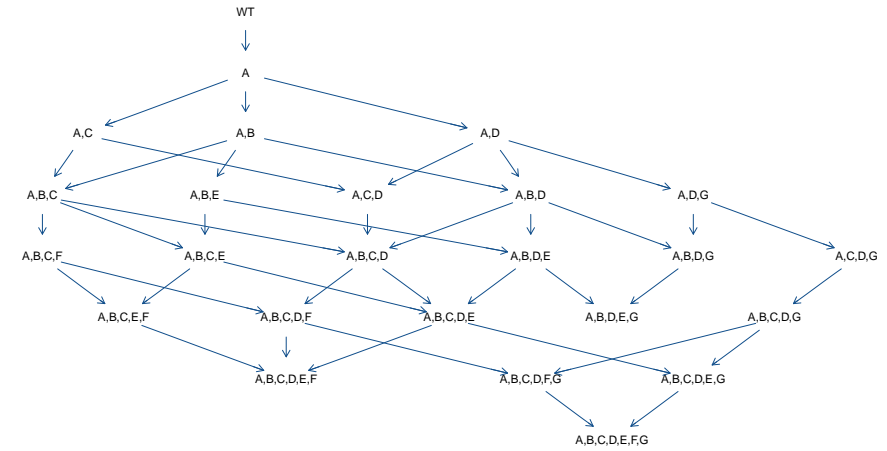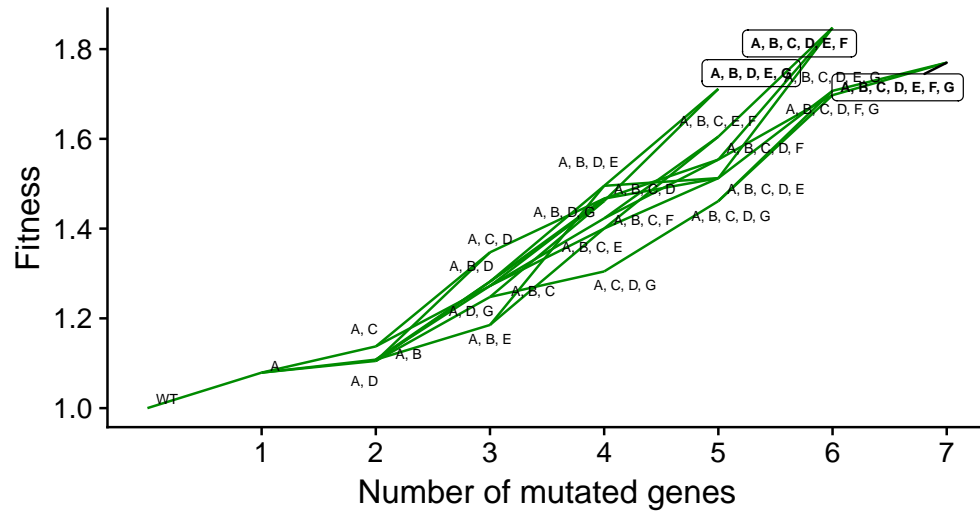

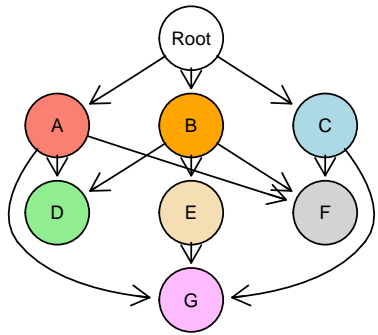

ID Asdds4Nn2MDRrNBH  
 acc genotypes 24  
 peaks no back 5  
 removed edges 6  
 prop rem edges 0.136

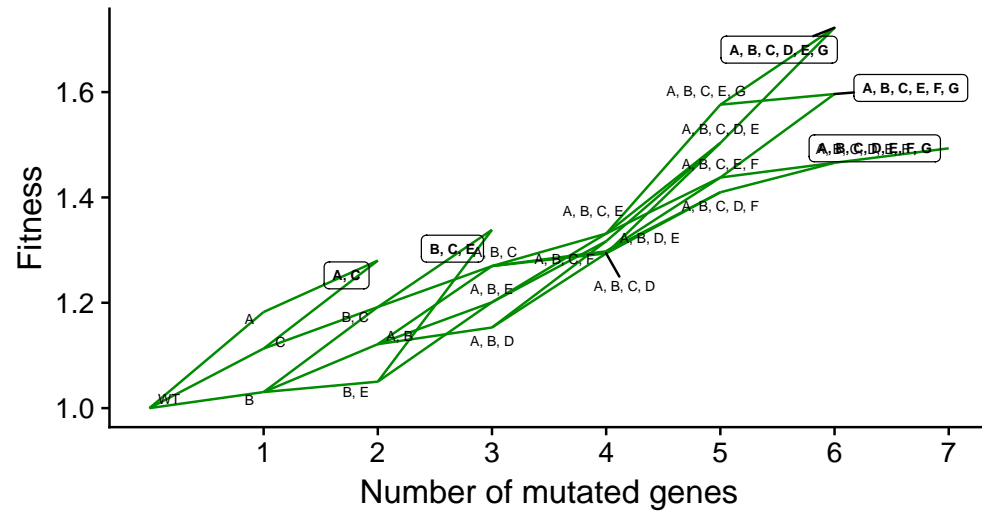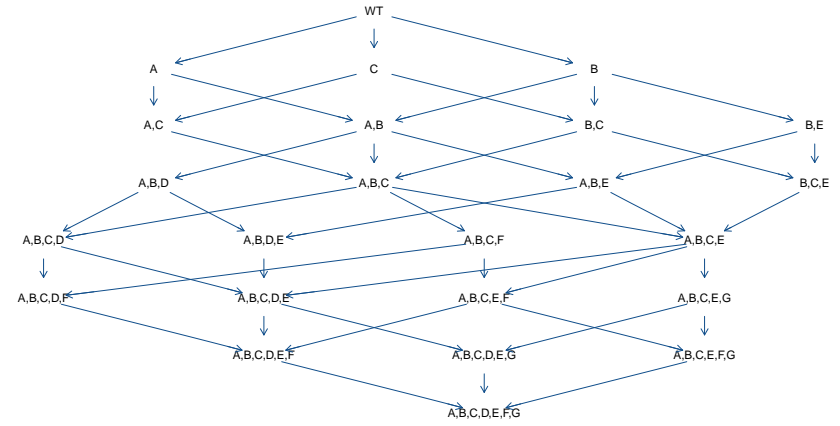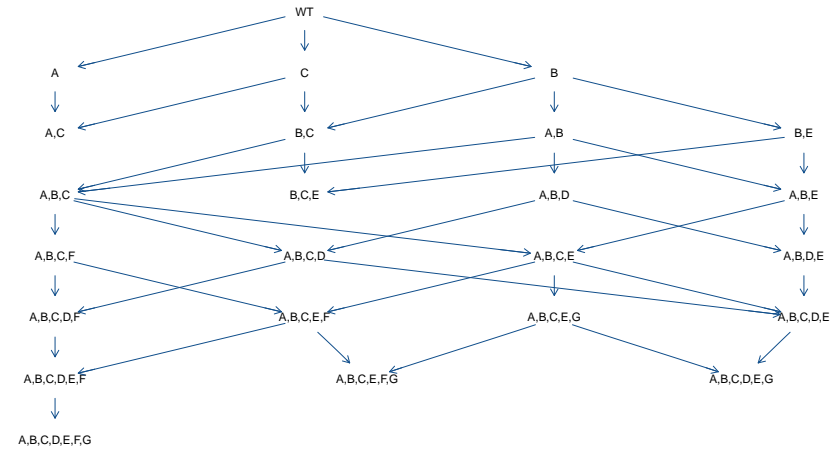

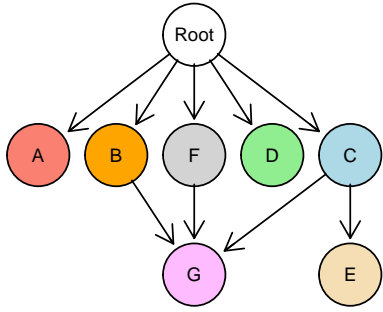

ID aW6TSVzKS8gXsaxO  
 acc genotypes 56  
 peaks no back 7  
 removed edges 28  
 prop rem edges 0.189

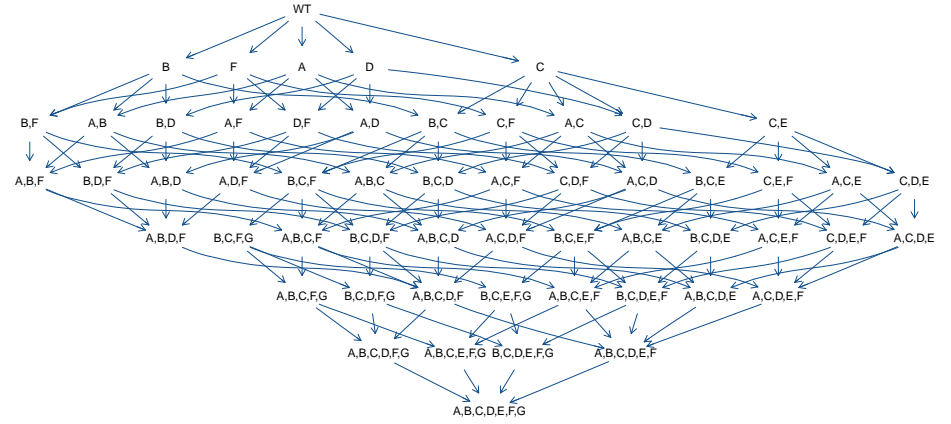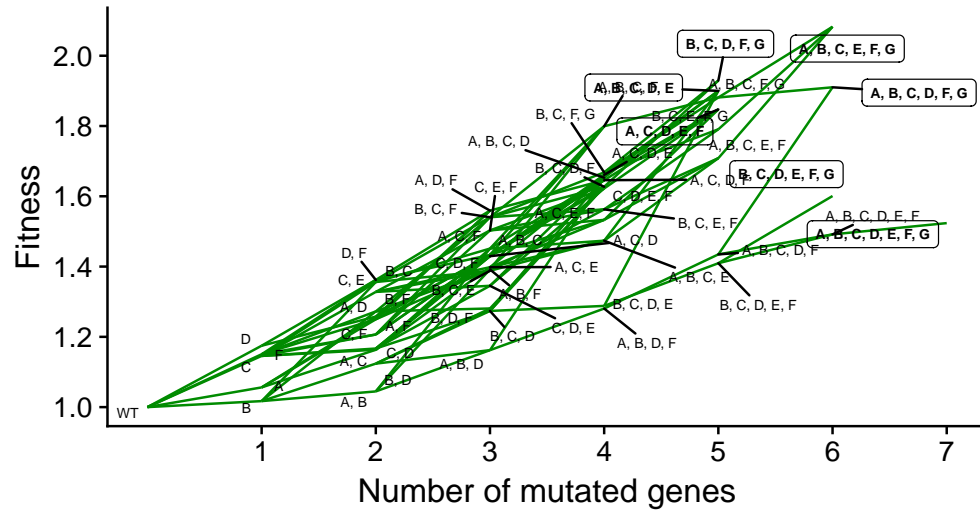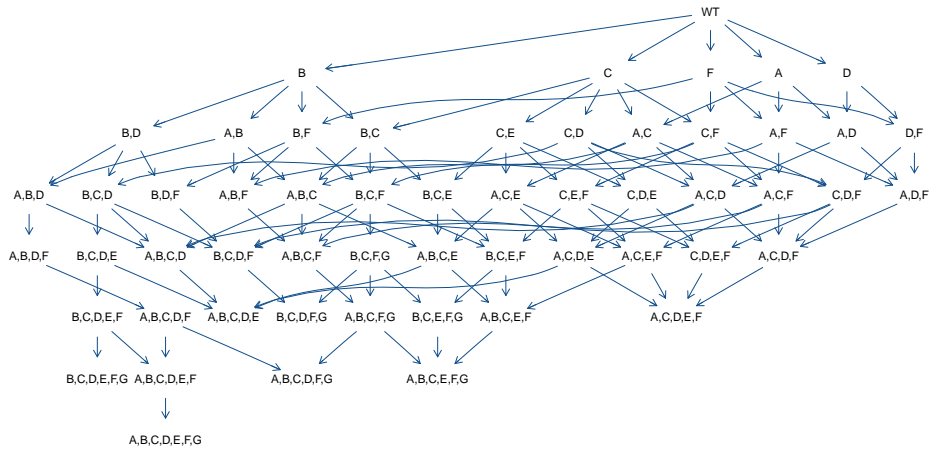

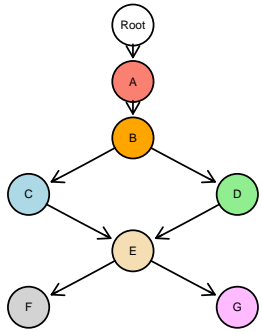

ID [AXnGmWZxzz5kfly4](#)  
 acc genotypes 10  
 peaks no back 2  
 removed edges 1  
 prop rem edges 0.091

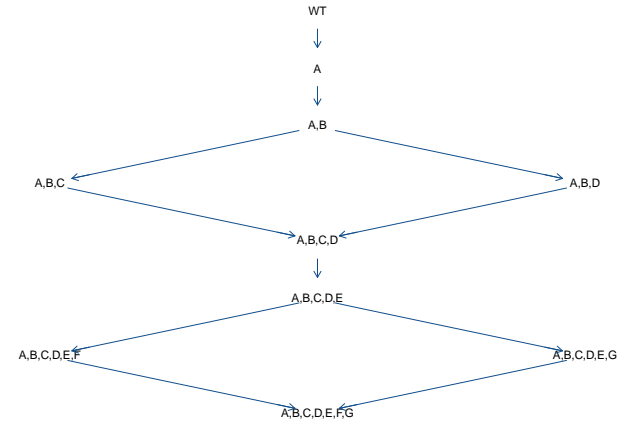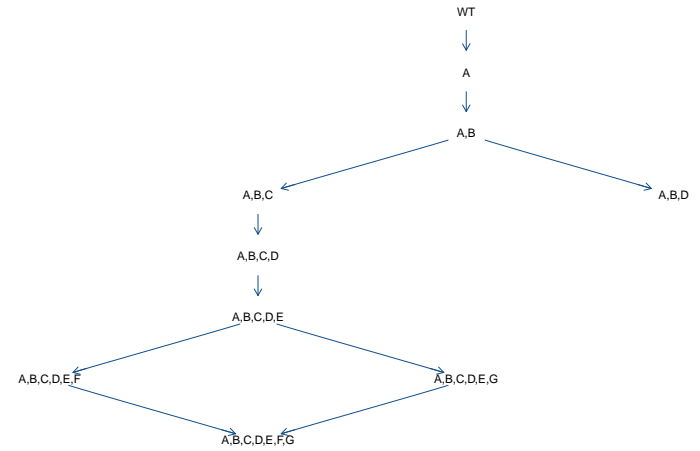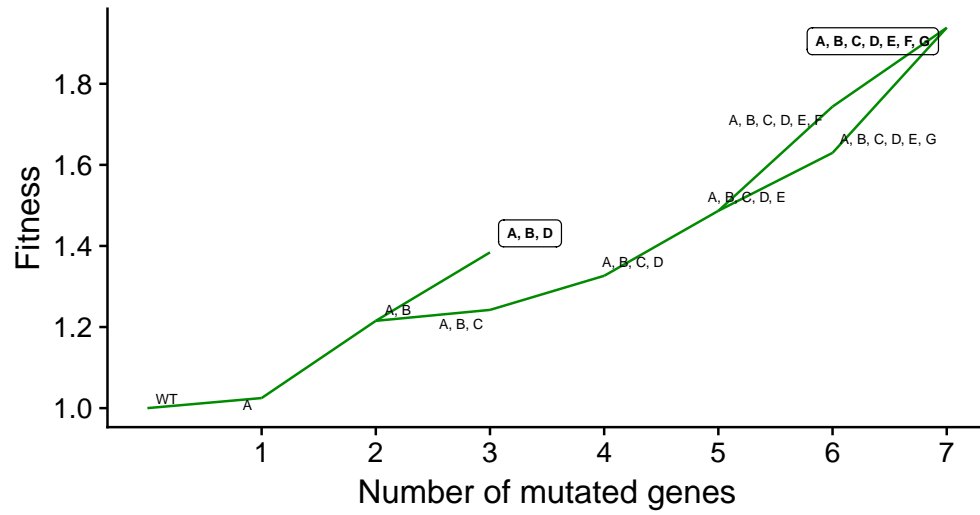

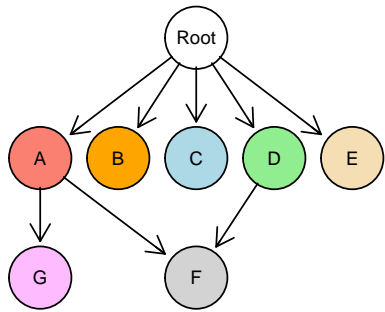

ID AYlKlxUEKLpymWH  
 acc genotypes 64  
 peaks no back 9  
 removed edges 33  
 prop rem edges 0.188

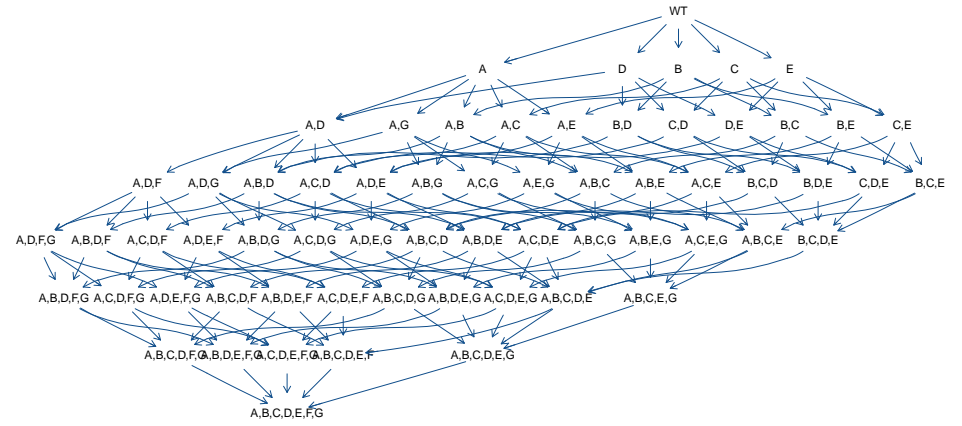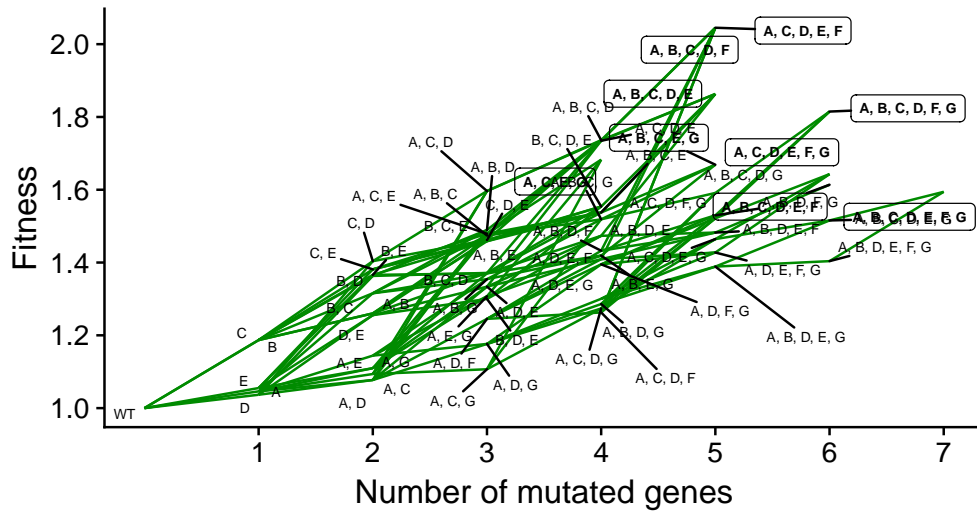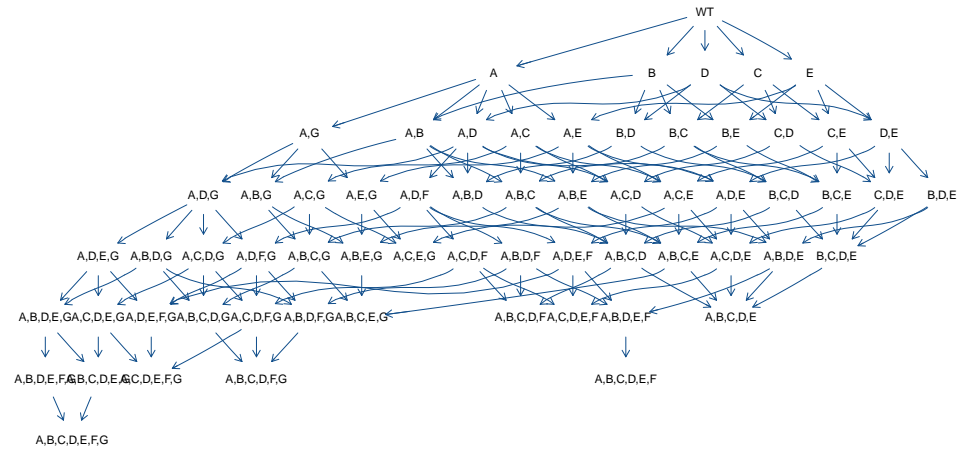

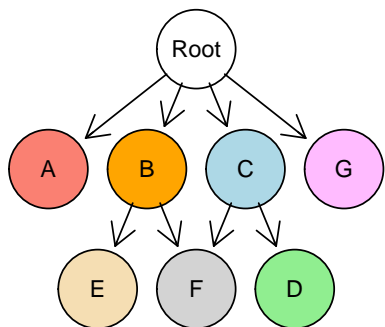

ID **b8dcfCJtzgN6gupz**  
 acc genotypes **52**  
 peaks no back **7**  
 removed edges **20**  
 prop rem edges **0.152**

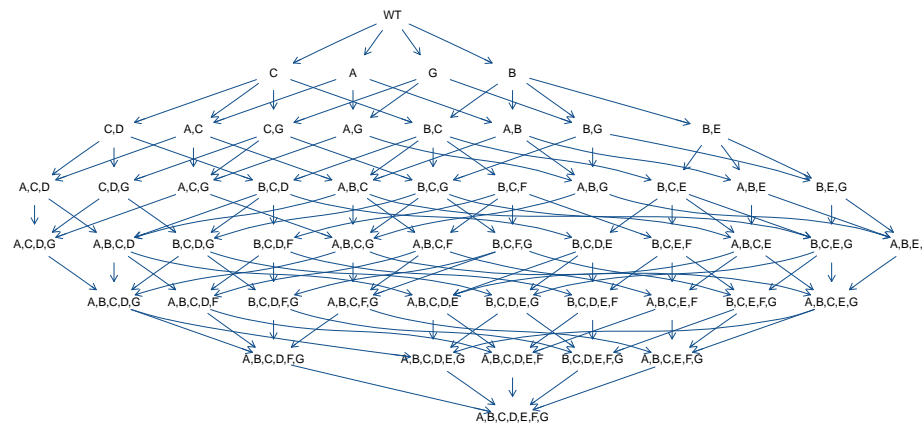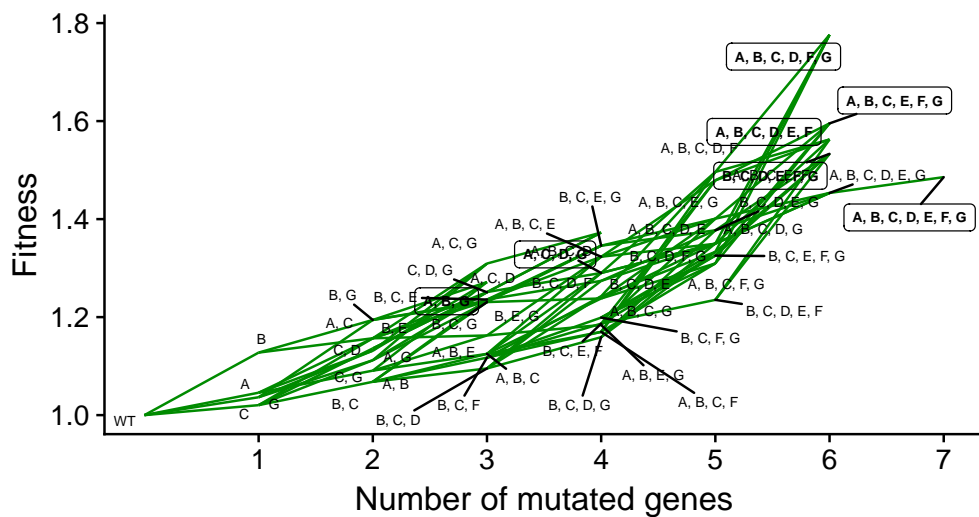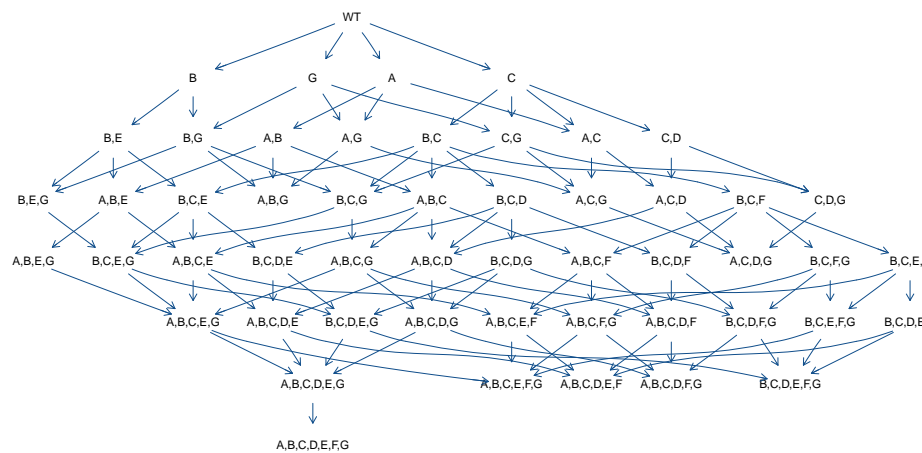



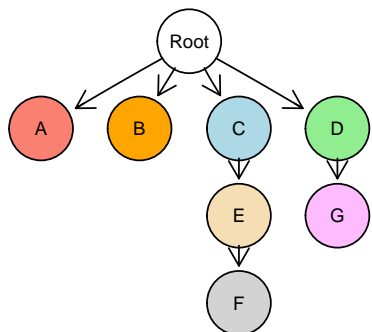

ID **b91s8fHjp10RnRLDw**  
 acc genotypes **48**  
 peaks no back **8**  
 removed edges **25**  
 prop rem edges **0.216**

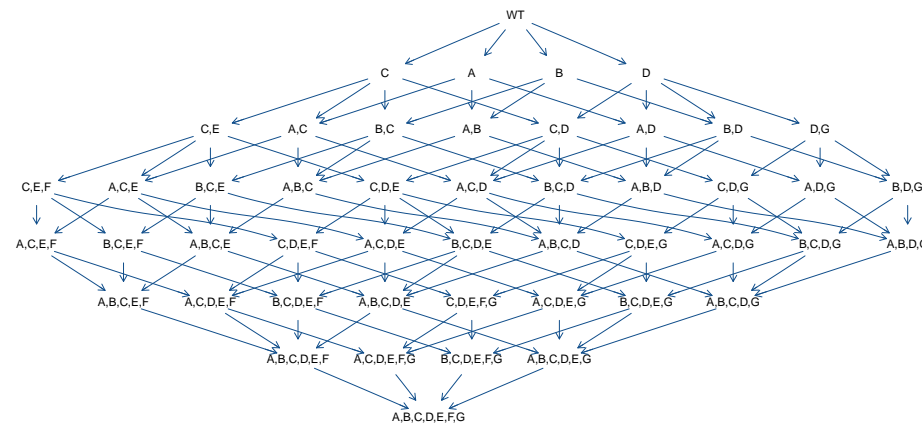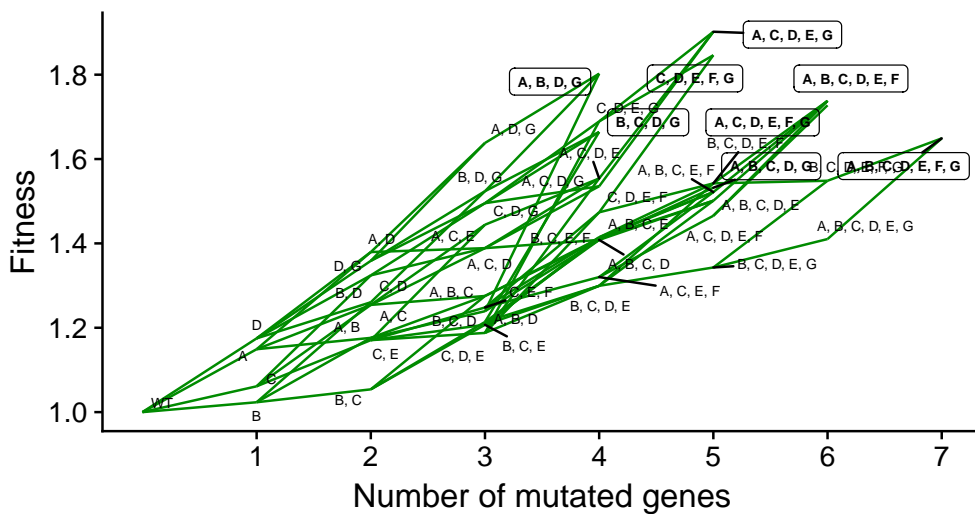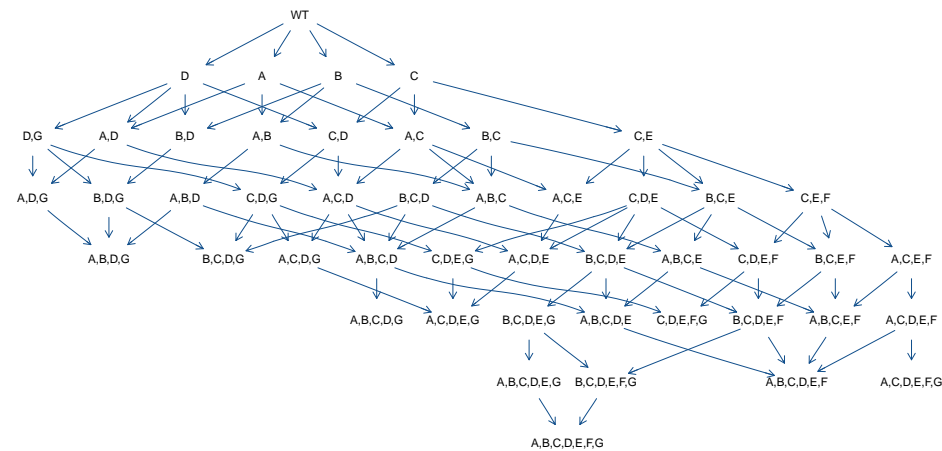

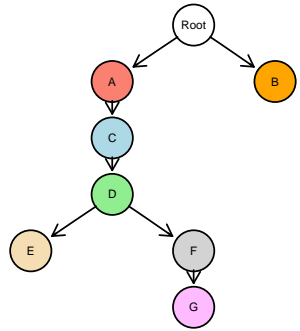

ID **bAM8Odp4yapUk10Fb**  
 acc genotypes **18**  
 peaks no back **4**  
 removed edges **4**  
 prop rem edges **0.138**

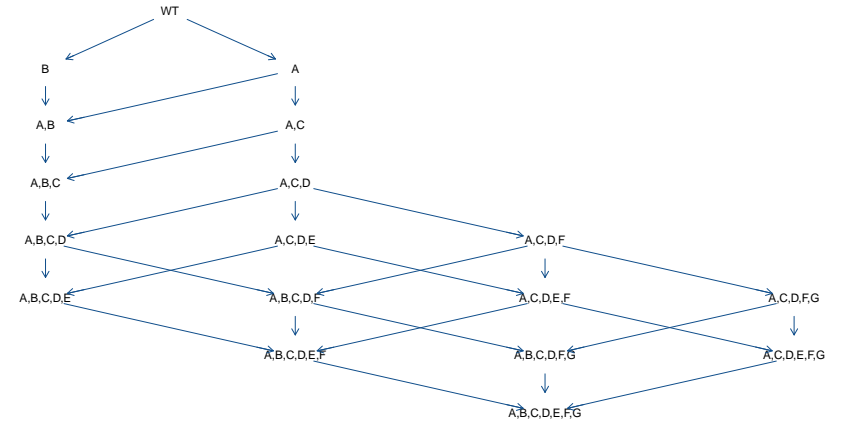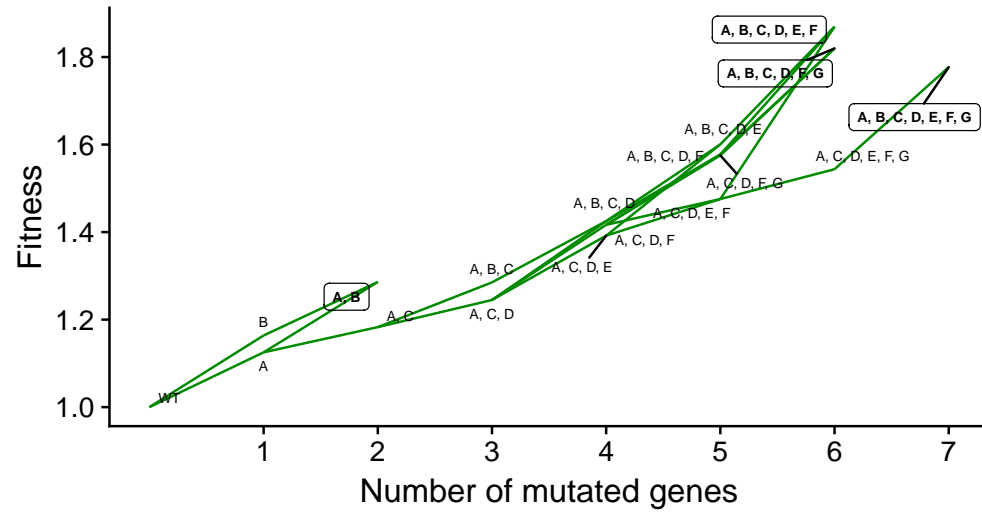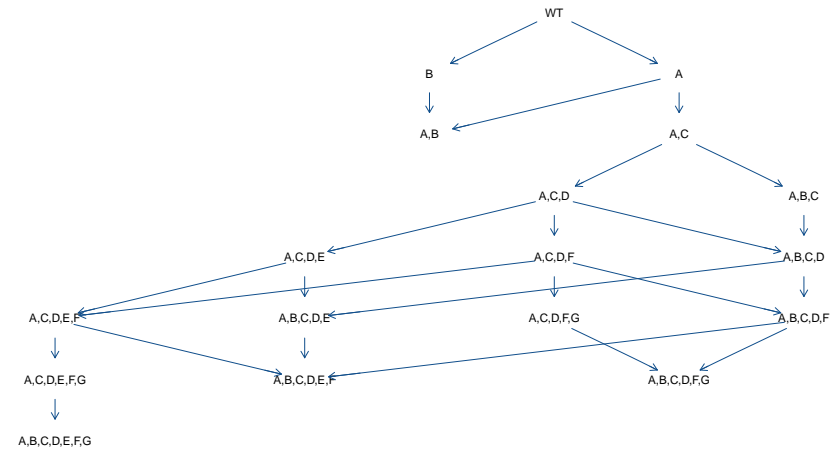

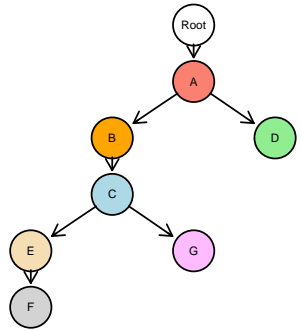

ID **bCsk2Qo5VMVm55fM**  
 acc genotypes **17**  
 peaks no back **2**  
 removed edges **3**  
 prop rem edges **0.111**

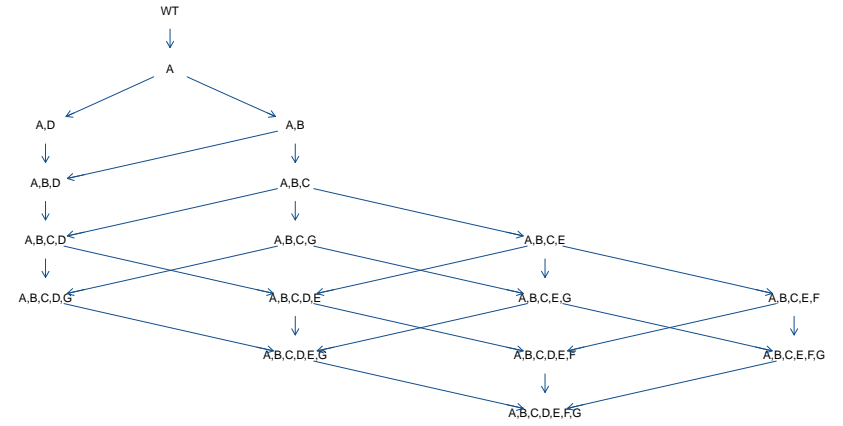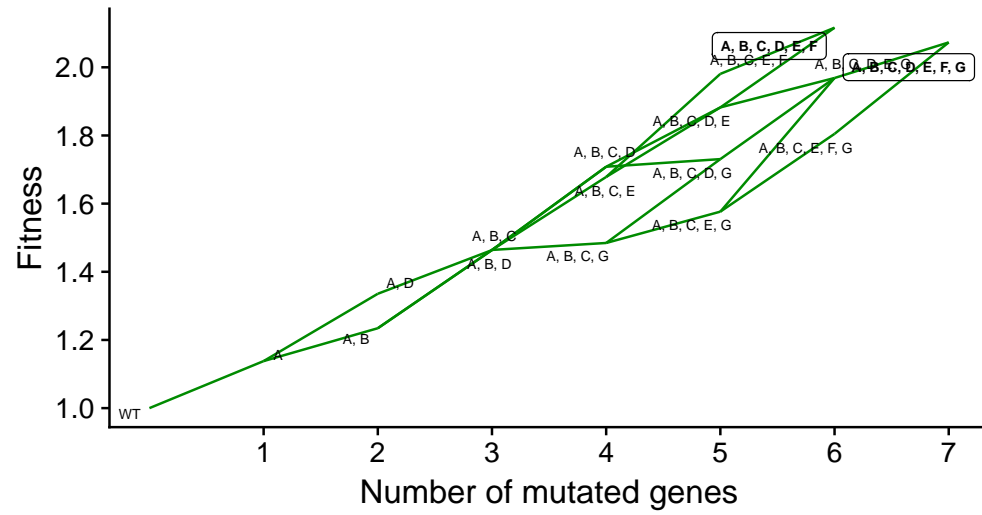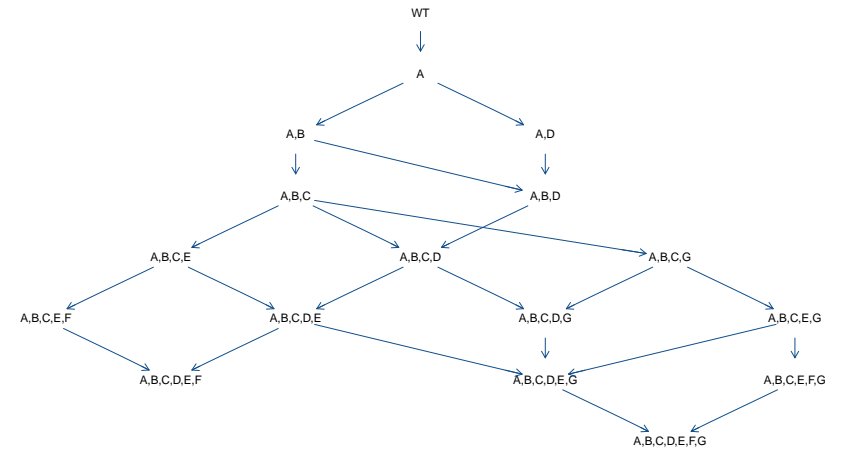

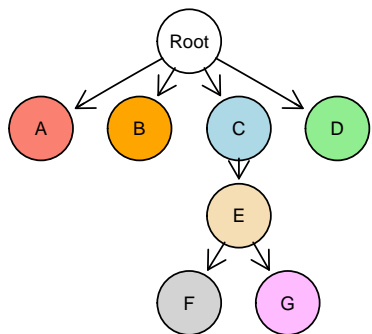

ID BeskIGyEmSHnws9  
 acc genotypes 48  
 peaks no back 7  
 removed edges 26  
 prop rem edges 0.217

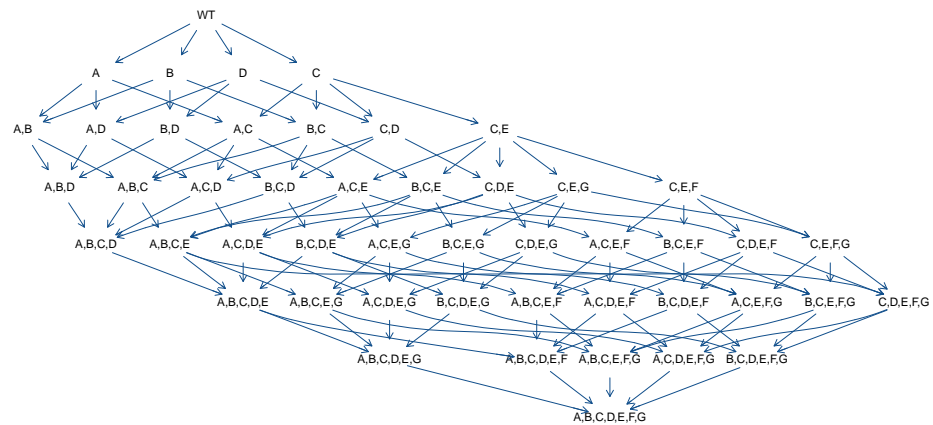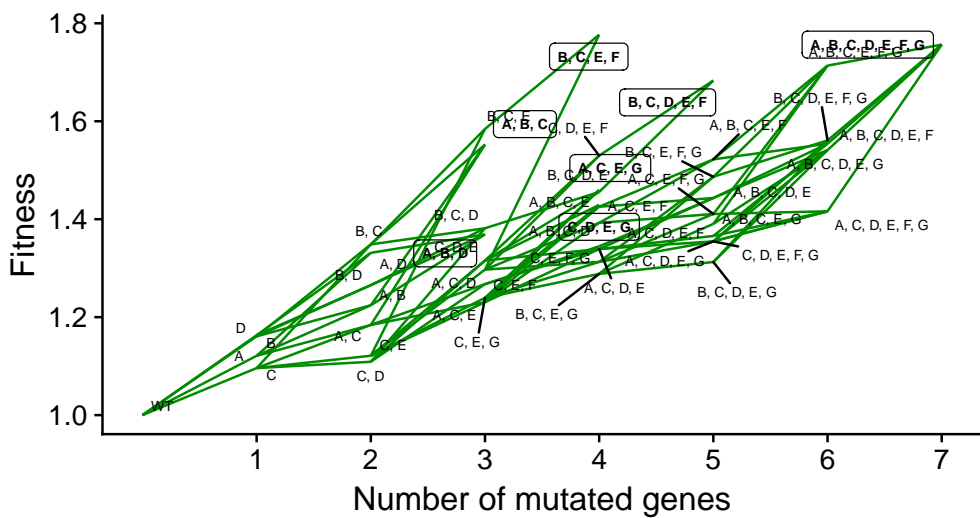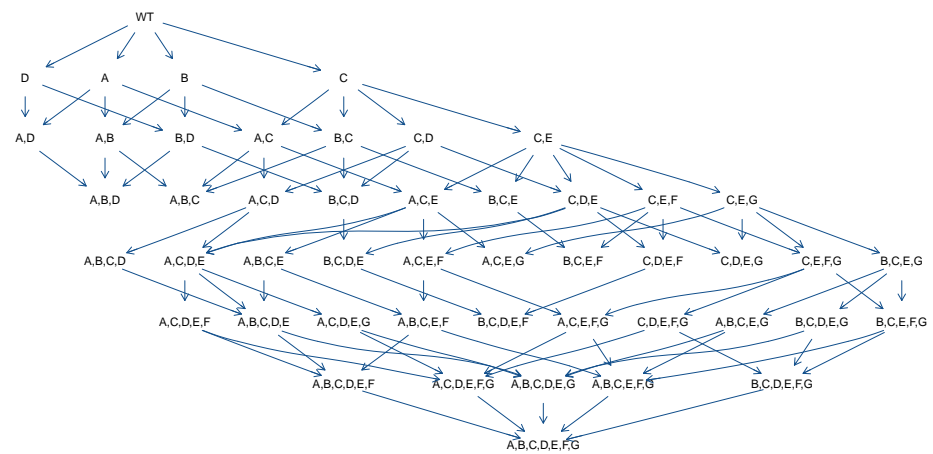

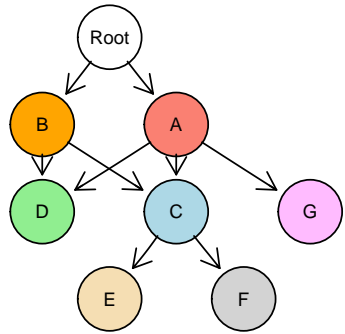

ID Bm107M6KzXSHrdvsu  
 acc genotypes 24  
 peaks no back 2  
 removed edges 3  
 prop rem edges 0.065

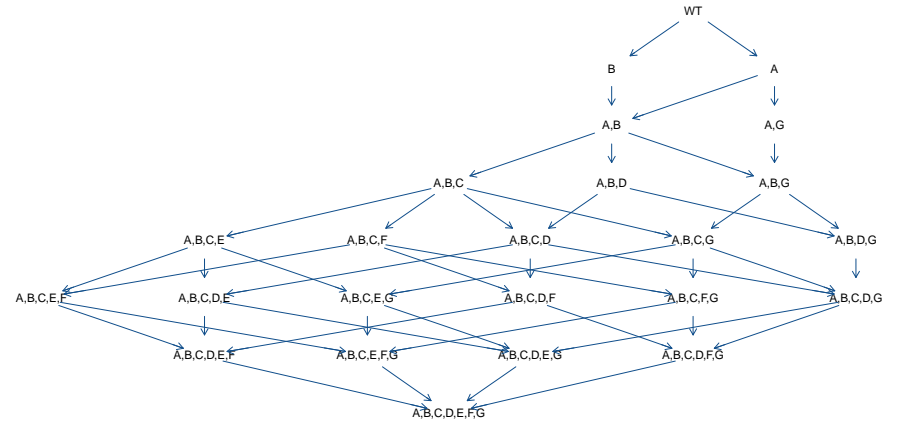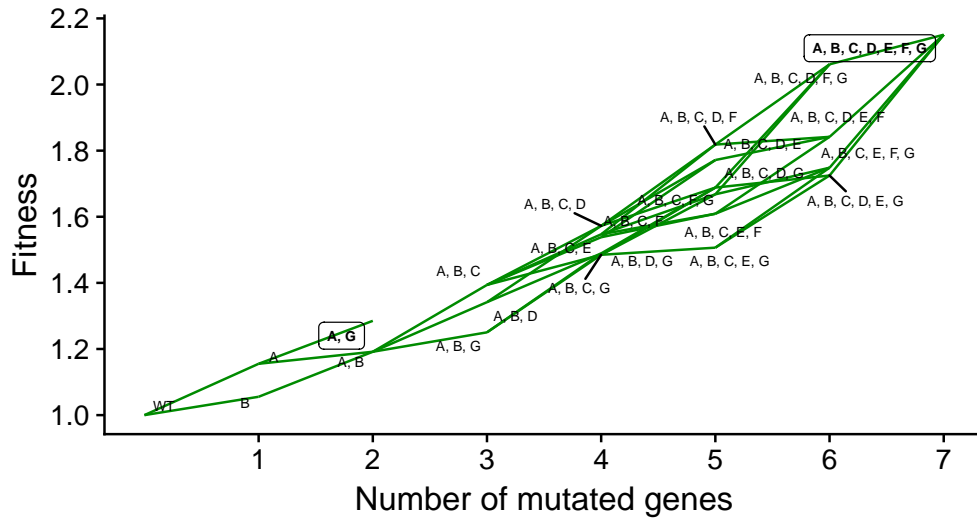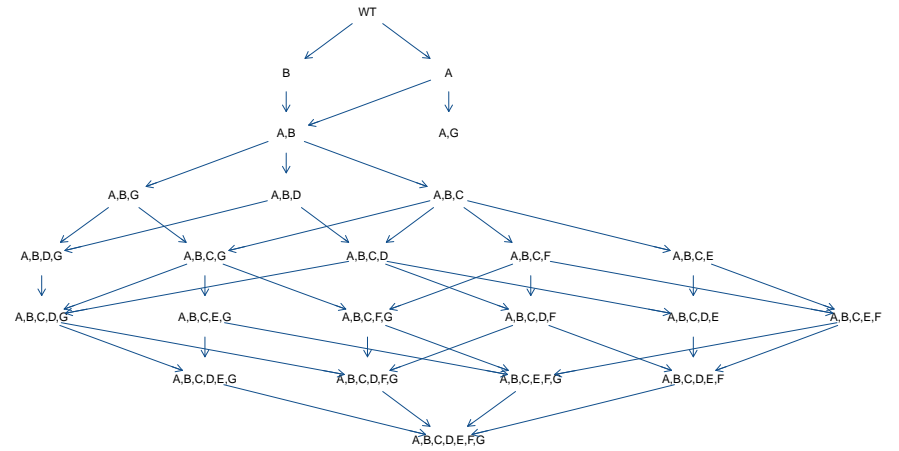

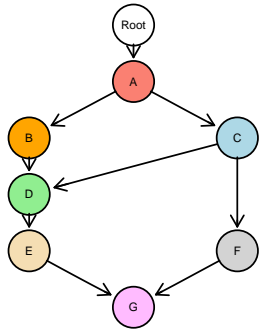

ID **Bm9gSkay114nALeA**  
 acc genotypes **12**  
 peaks no back **2**  
 removed edges **1**  
 prop rem edges **0.067**

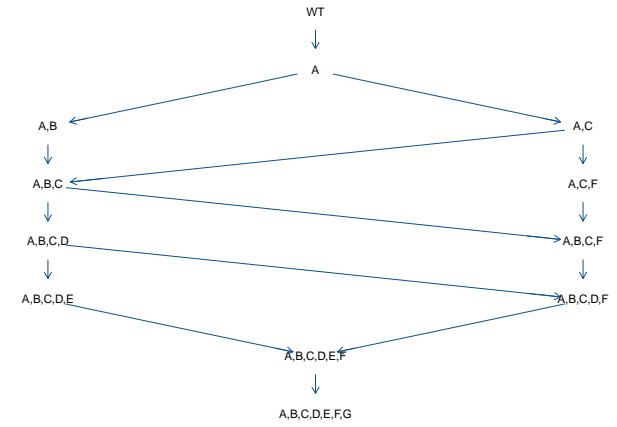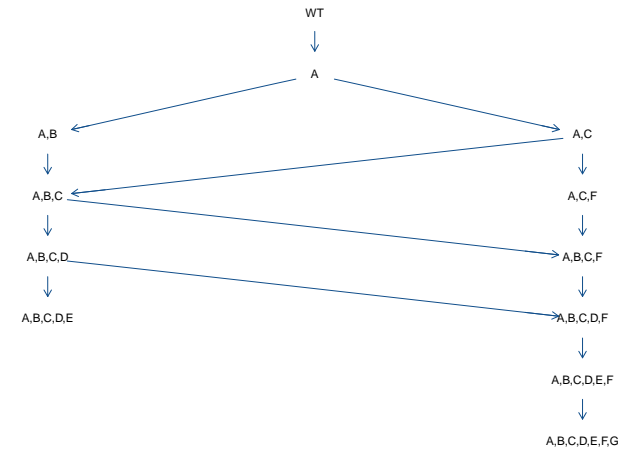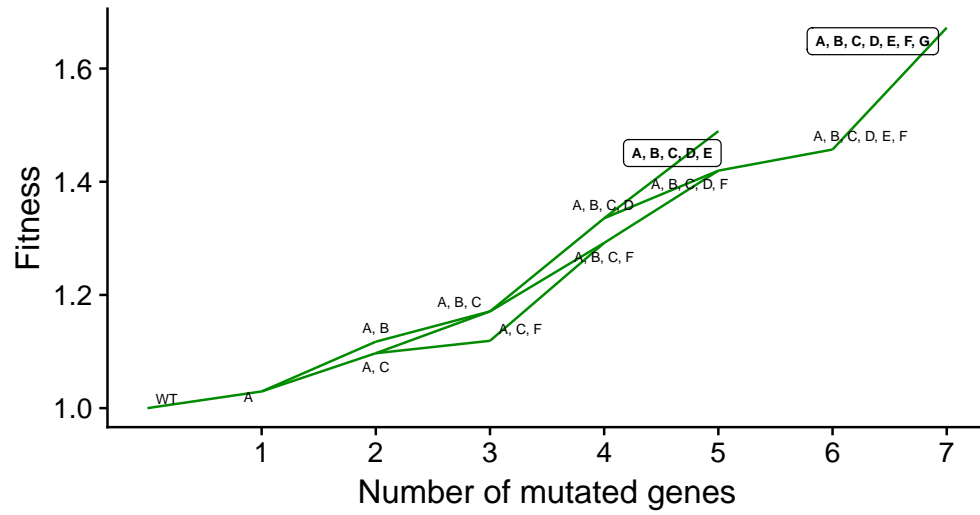

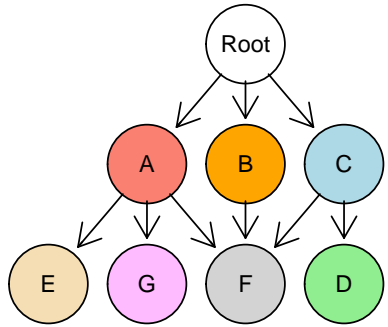

ID bpHispMQCIsXVnvs  
 acc genotypes 38  
 peaks no back 6  
 removed edges 9  
 prop rem edges 0.106

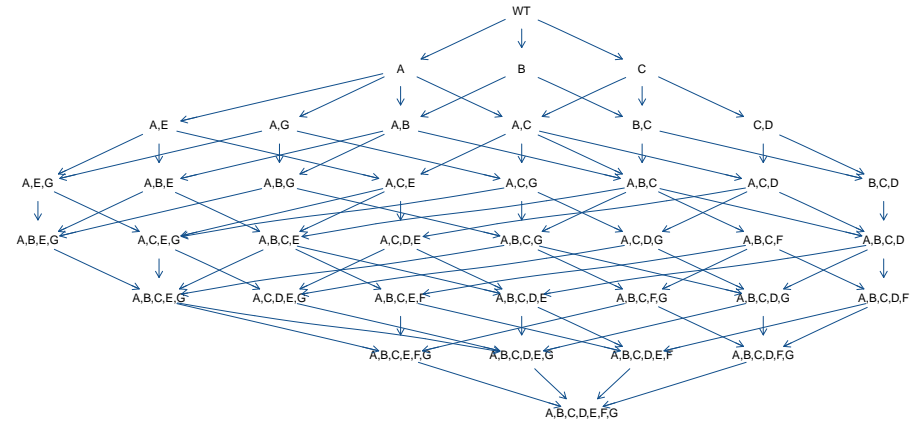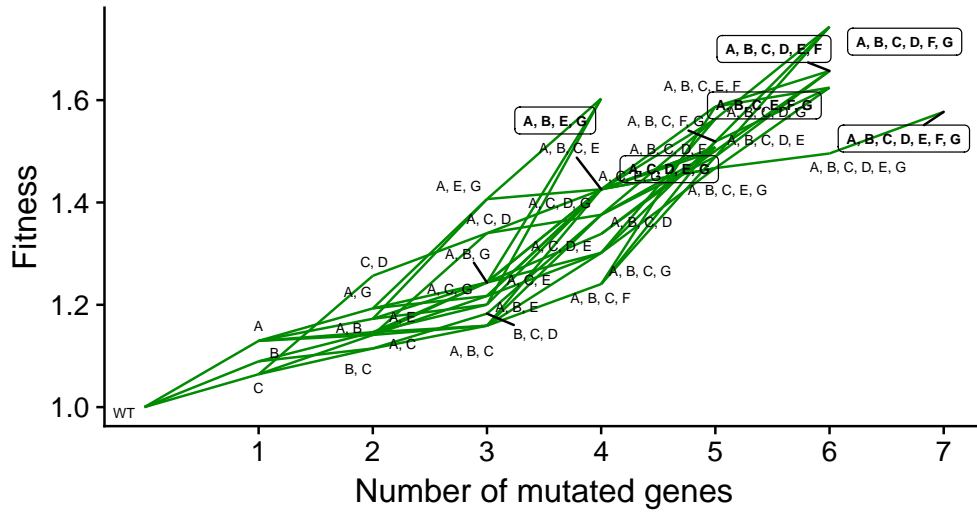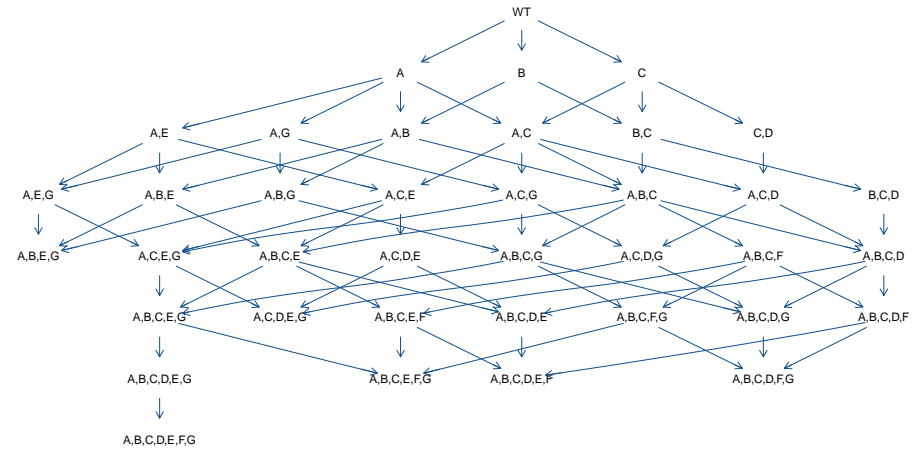

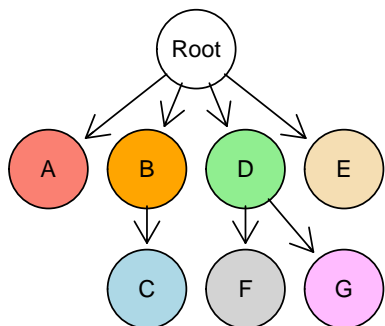

ID **BQW2TKpC1B6DJ7JN**  
 acc genotypes **60**  
 peaks no back **4**  
 removed edges **27**  
 prop rem edges **0.169**

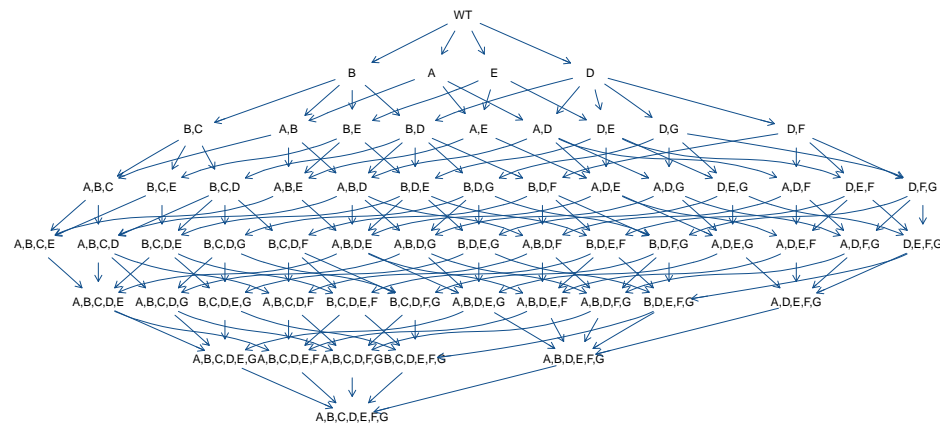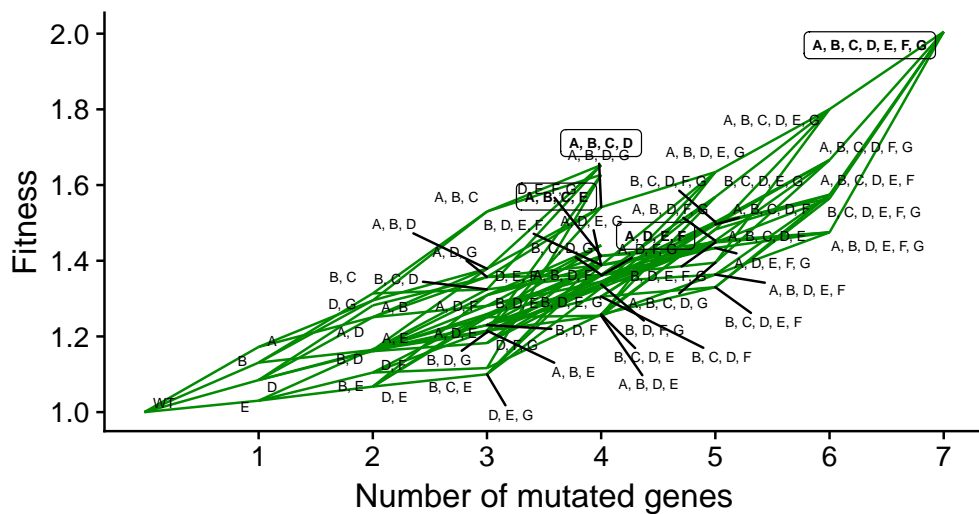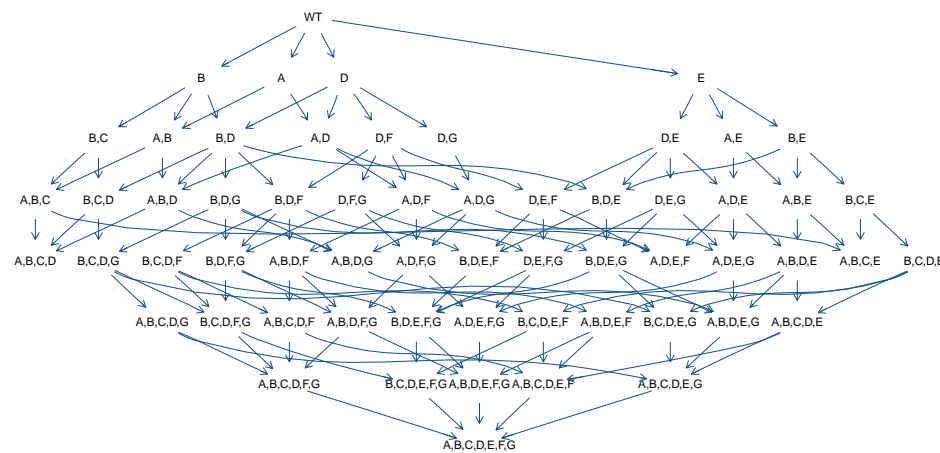



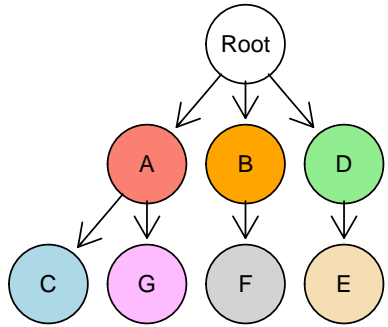

ID **BXIHohn6cCcf6nR**  
 acc genotypes **45**  
 peaks no back **8**  
 removed edges **20**  
 prop rem edges **0.19**

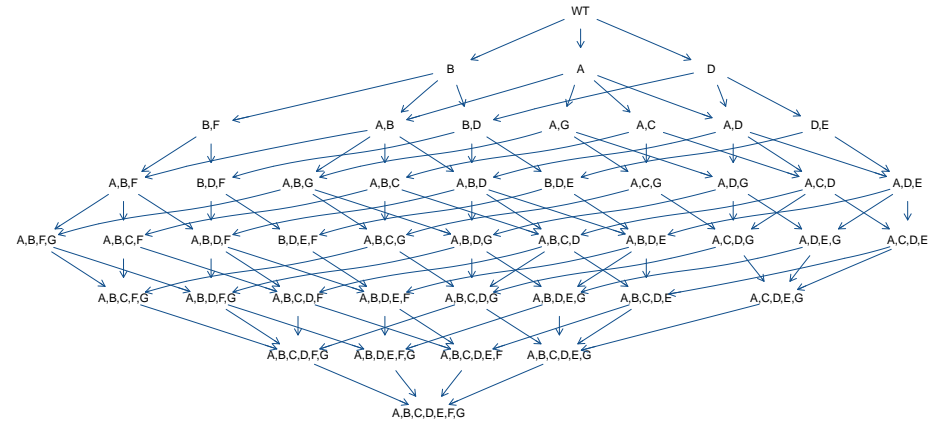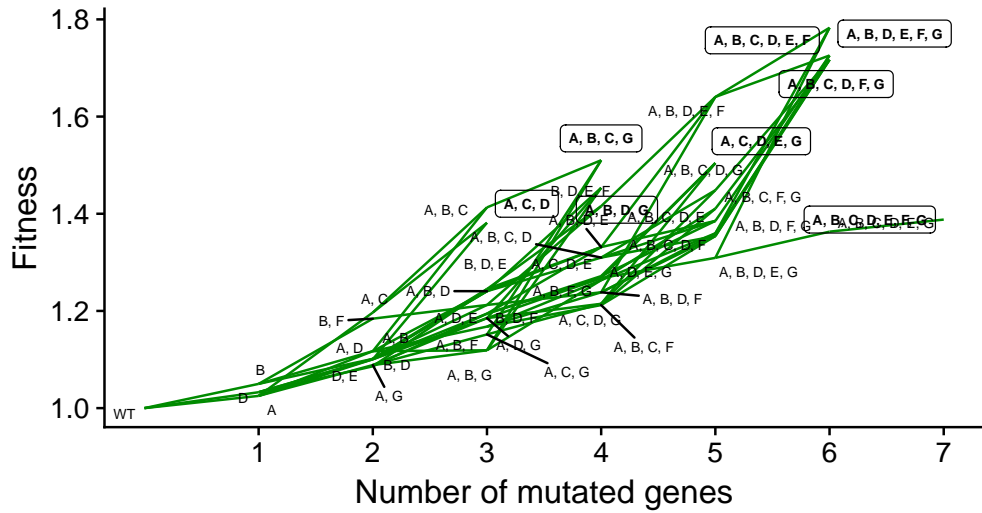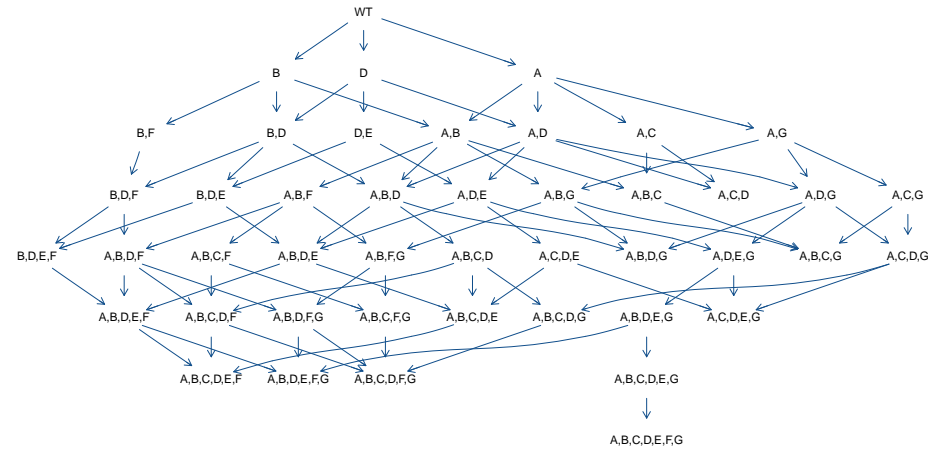

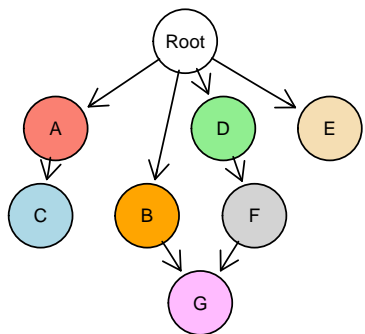

ID BzCzics10JlcdE1020  
 acc genotypes 42  
 peaks no back 6  
 removed edges 16  
 prop rem edges 0.165

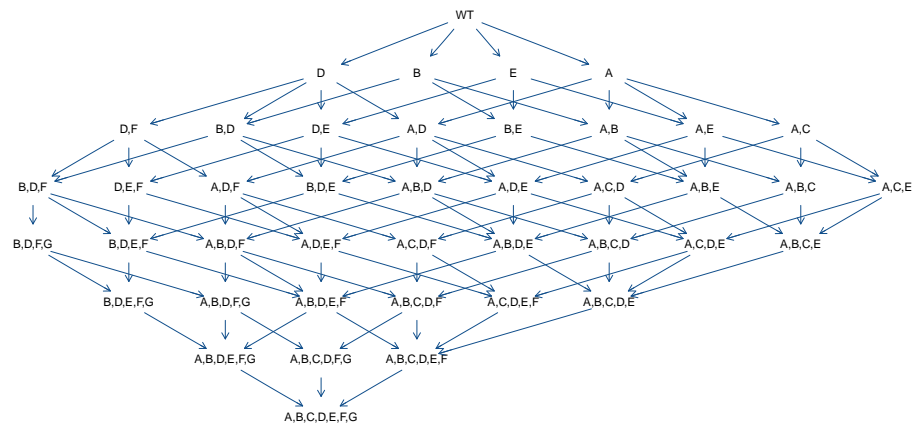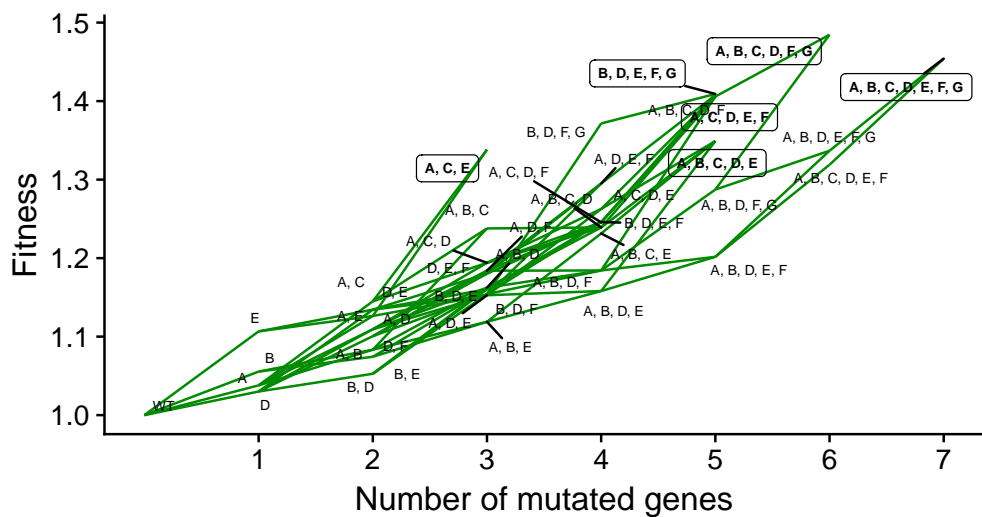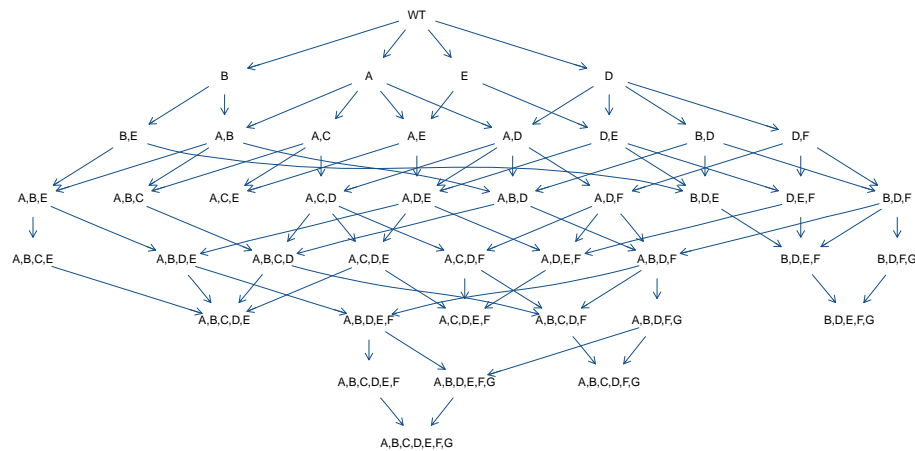

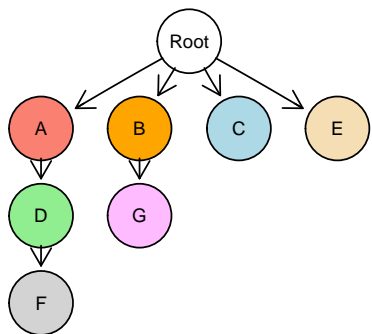

ID **c9GVdRVUtkHv3yR7**  
 acc genotypes **48**  
 peaks no back **4**  
 removed edges **23**  
 prop rem edges **0.198**

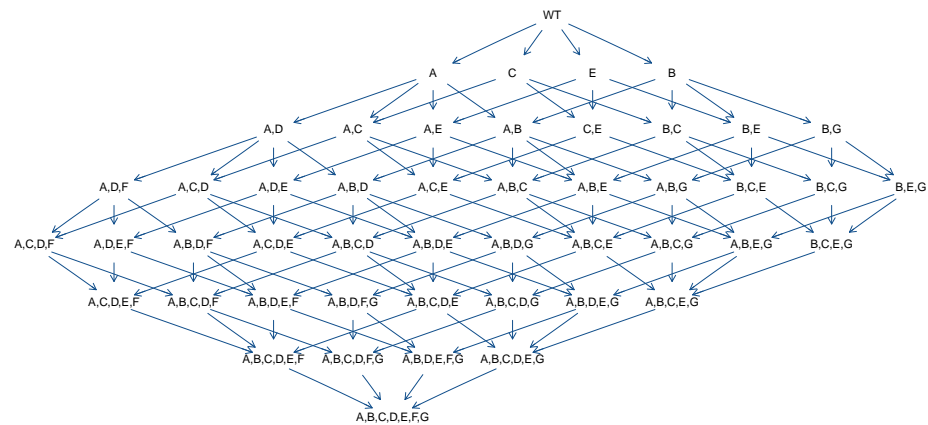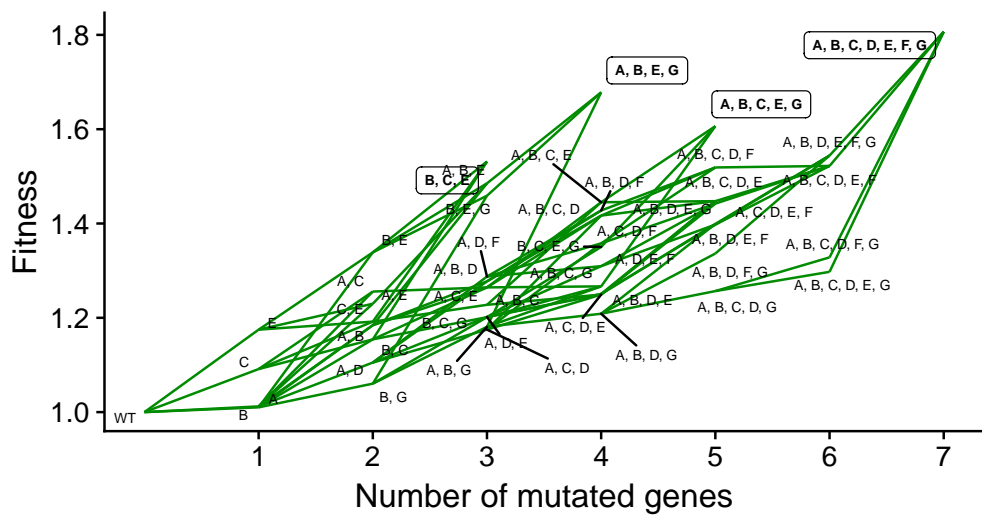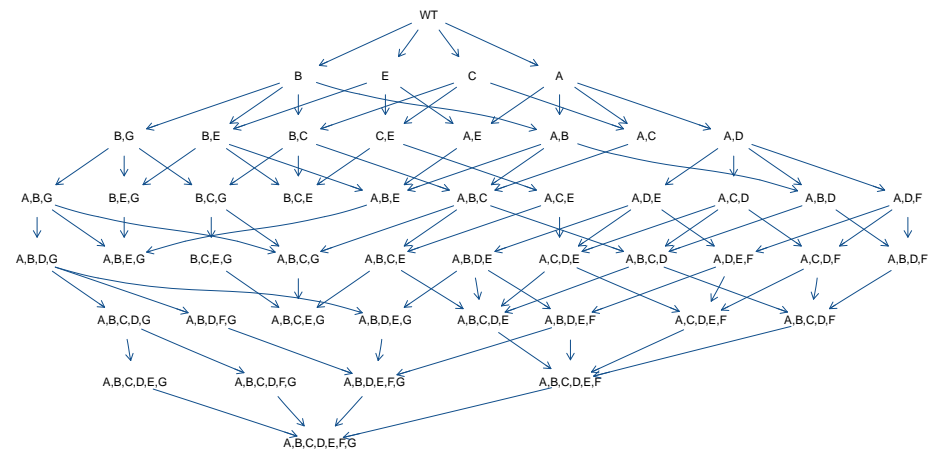

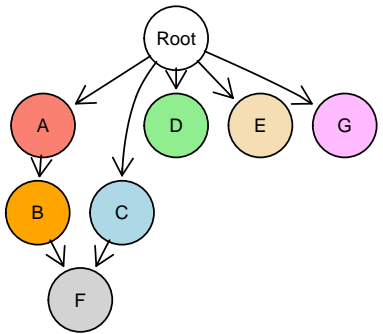

ID C9MQvf10YWmVwuUpW  
 acc genotypes 56  
 peaks no back 9  
 removed edges 32  
 prop rem edges 0.216

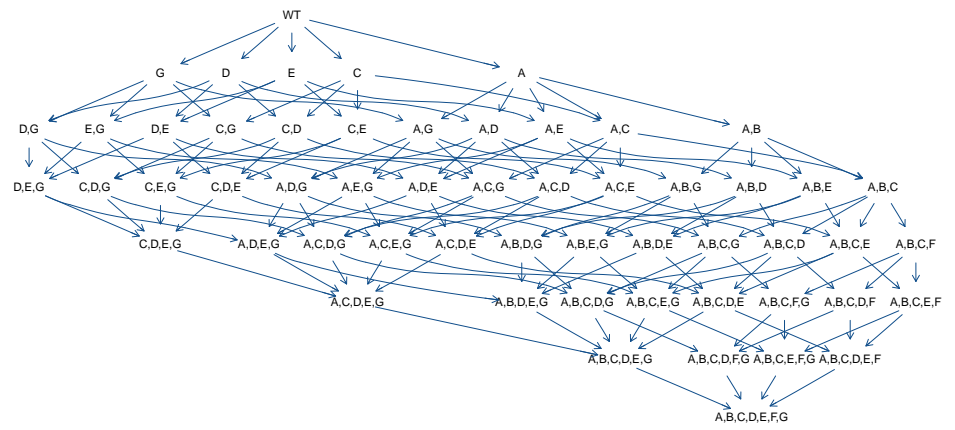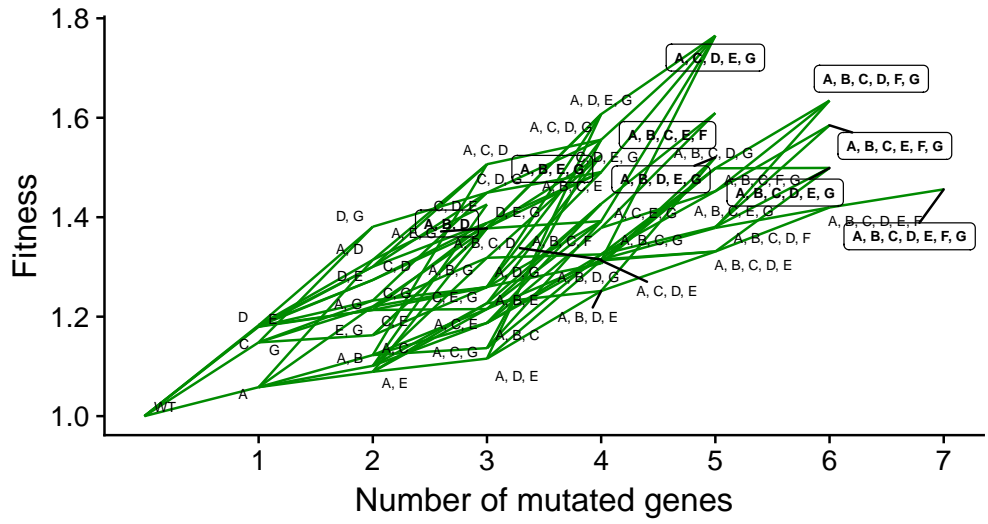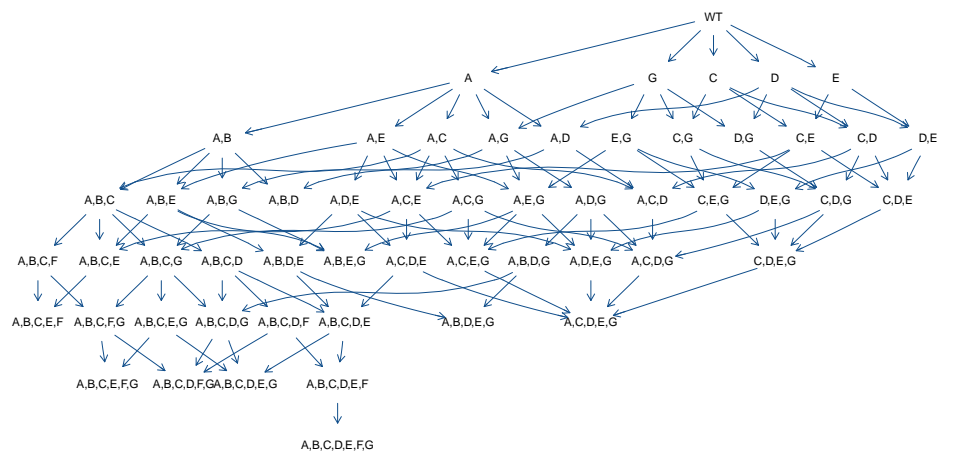

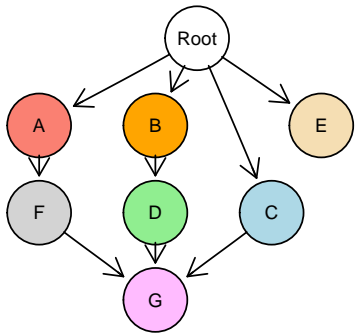

ID [ce4Pp9mhcgxMJhs9](#)  
 acc genotypes 38  
 peaks no back 3  
 removed edges 9  
 prop rem edges 0.103

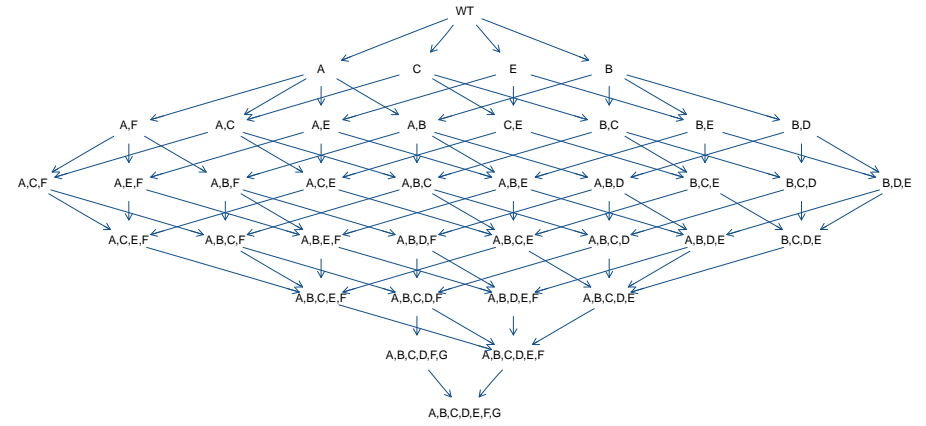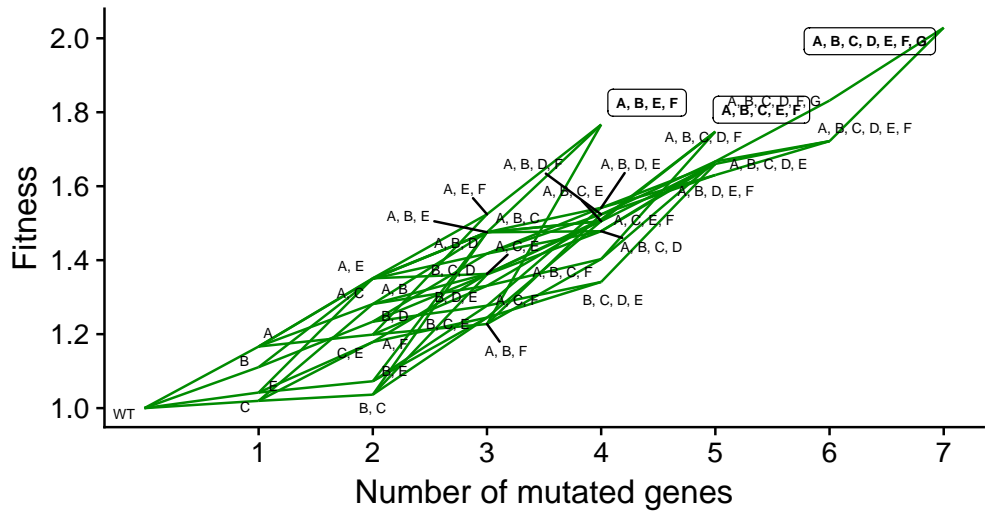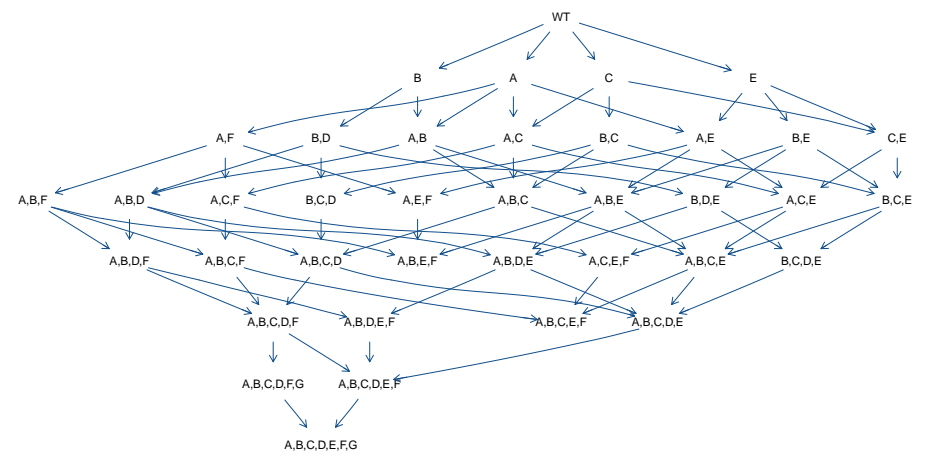

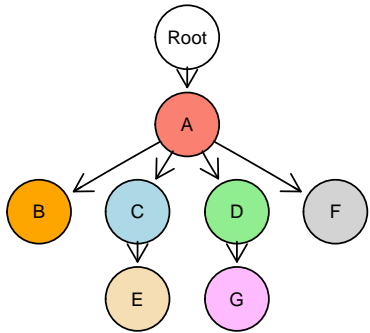

ID **cfODc4wi4uNS9zkM**  
 acc genotypes **37**  
 peaks no back **6**  
 removed edges **16**  
 prop rem edges **0.188**

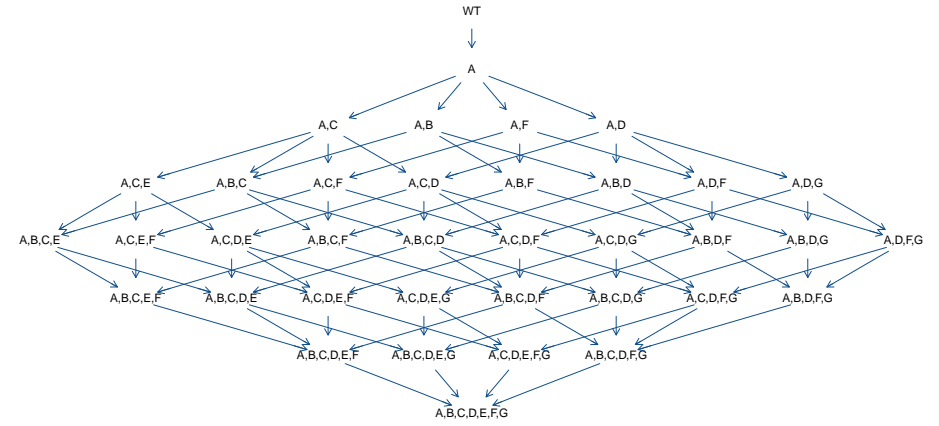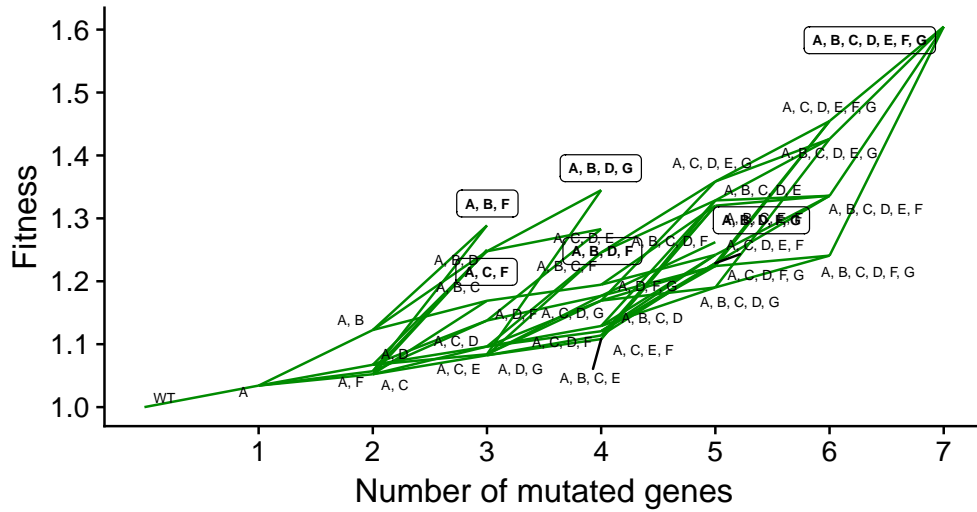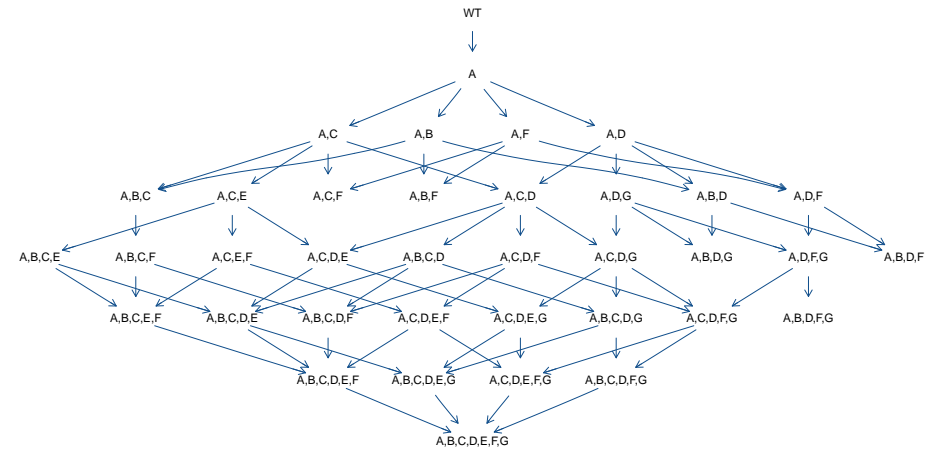

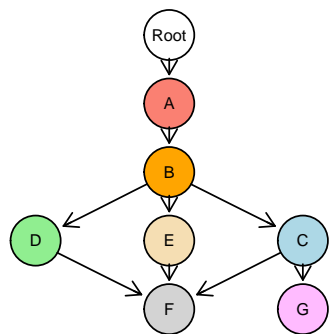

ID [chTnx8SjPrqKECWb](#)  
 acc genotypes 16  
 peaks no back 3  
 removed edges 5  
 prop rem edges 0.2

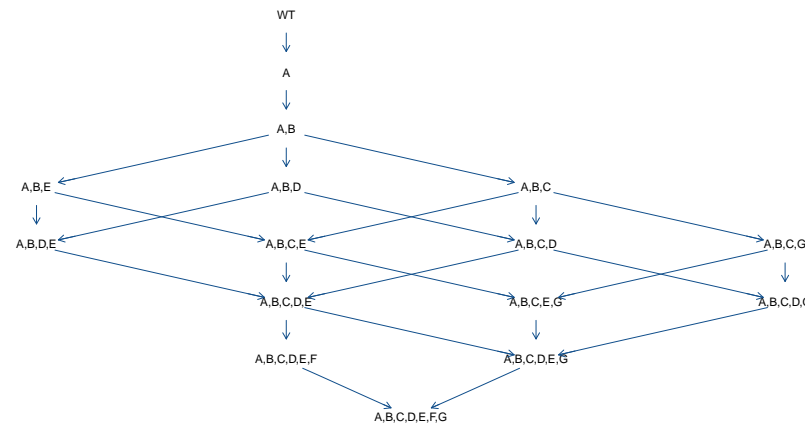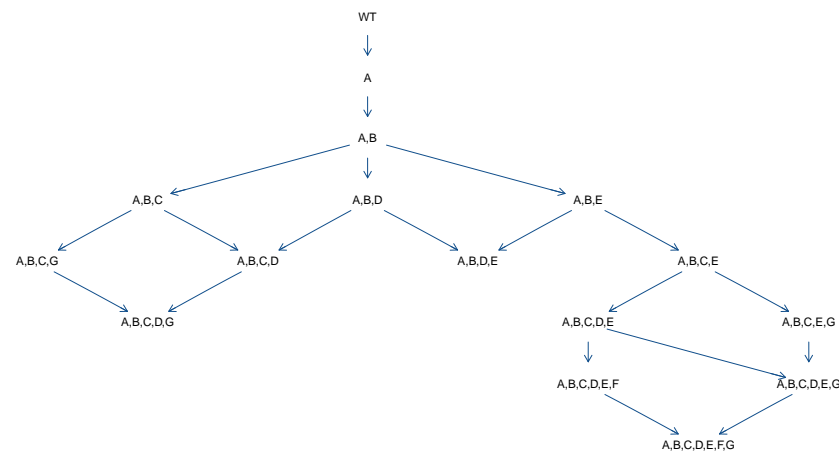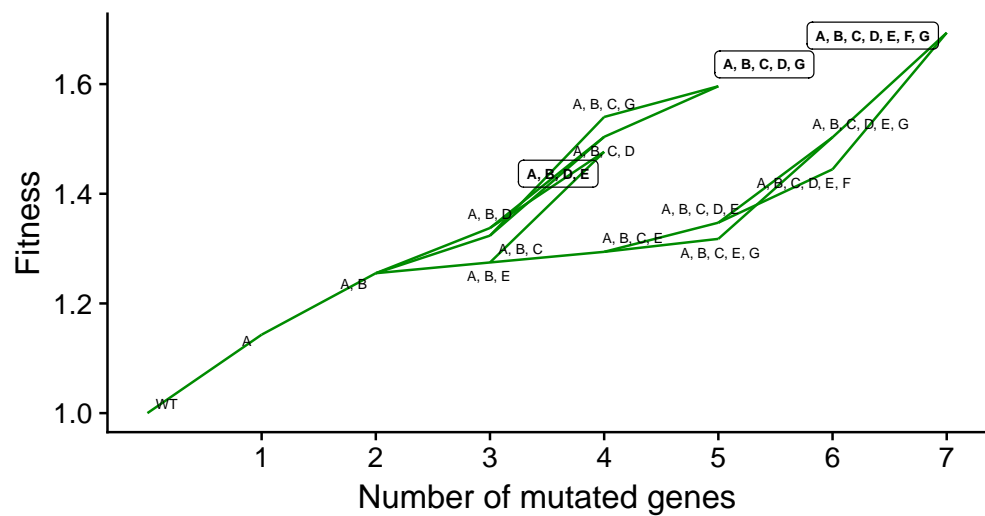

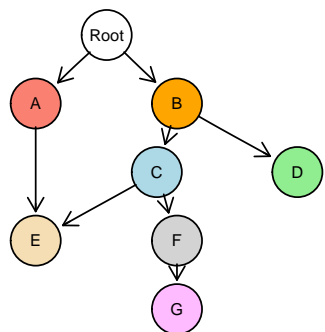

ID ClxqJzXIXIPDwCzC  
 acc genotypes 24  
 peaks no back 5  
 removed edges 7  
 prop rem edges 0.159

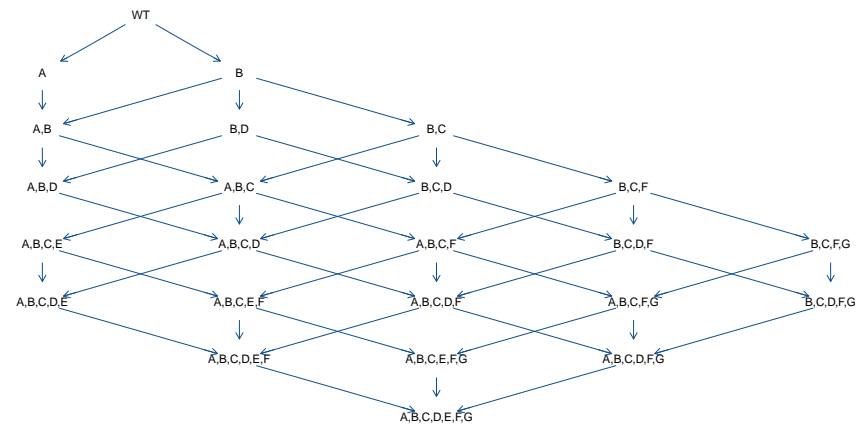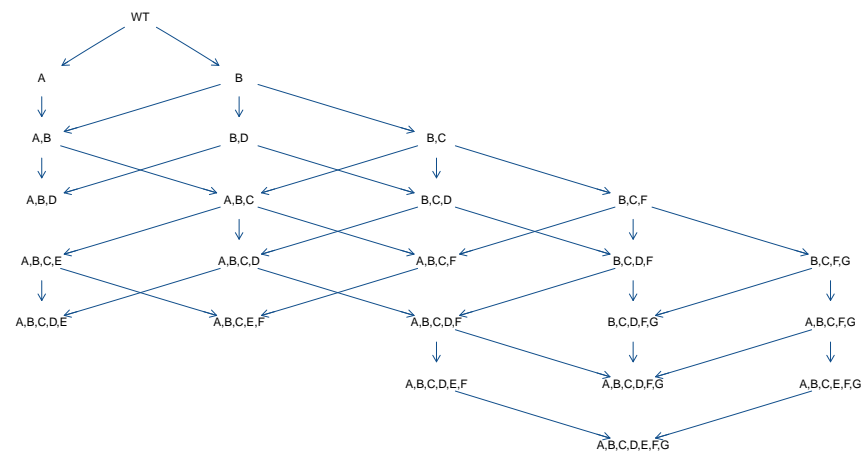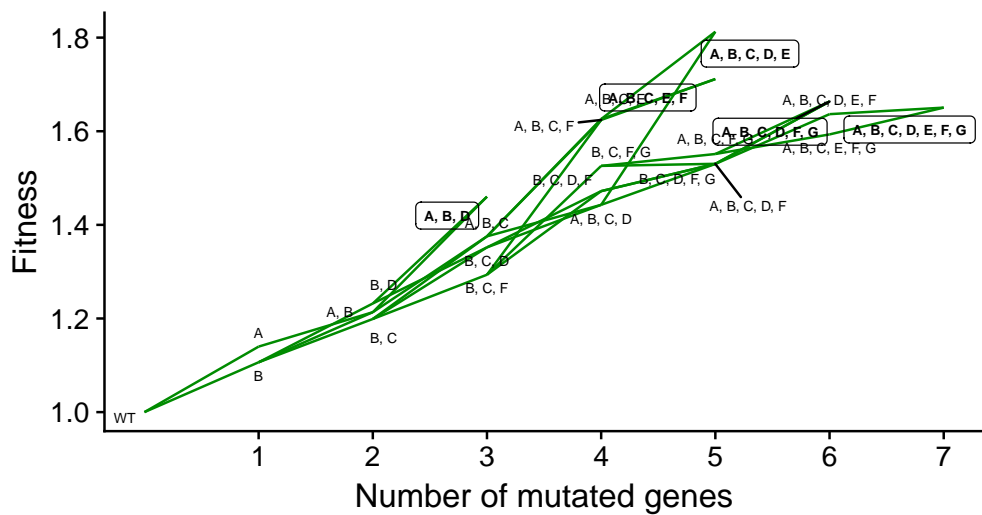



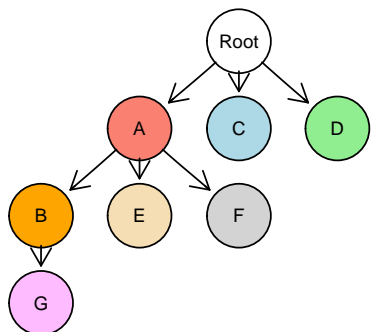

ID cPTyfbkkNctnZY8i  
 acc genotypes 52  
 peaks no back 7  
 removed edges 30  
 prop rem edges 0.221

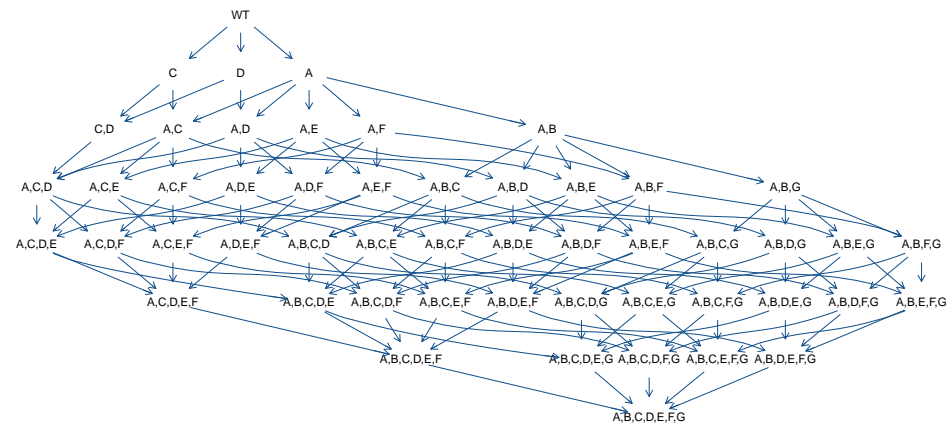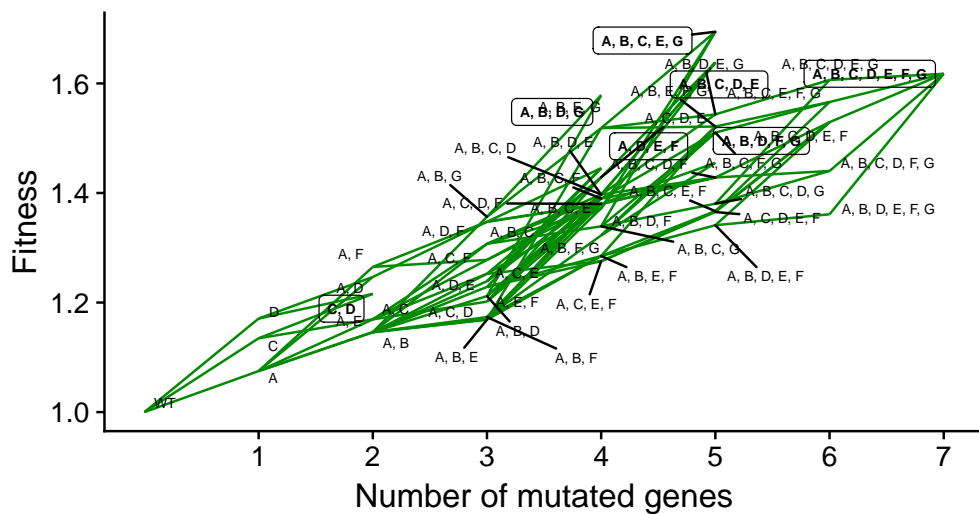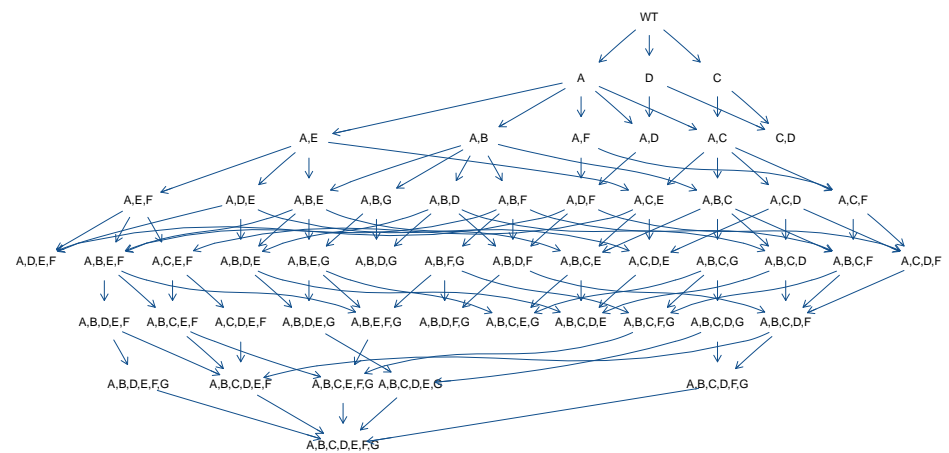

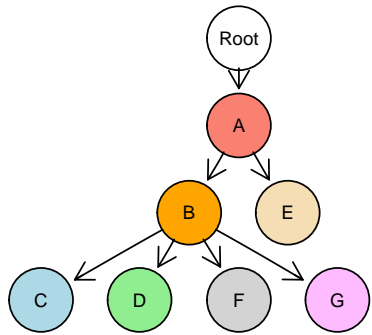

ID **cPvIM3BD3obpDIZu**  
 acc genotypes **35**  
 peaks no back **4**  
 removed edges **6**  
 prop rem edges **0.071**

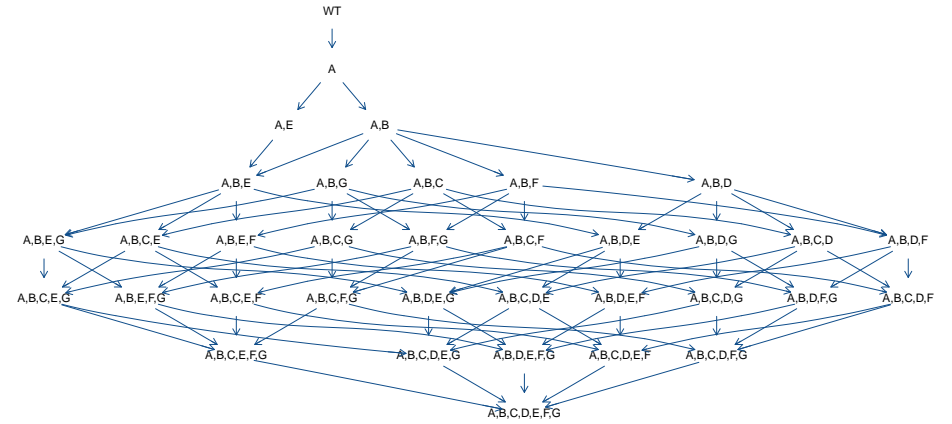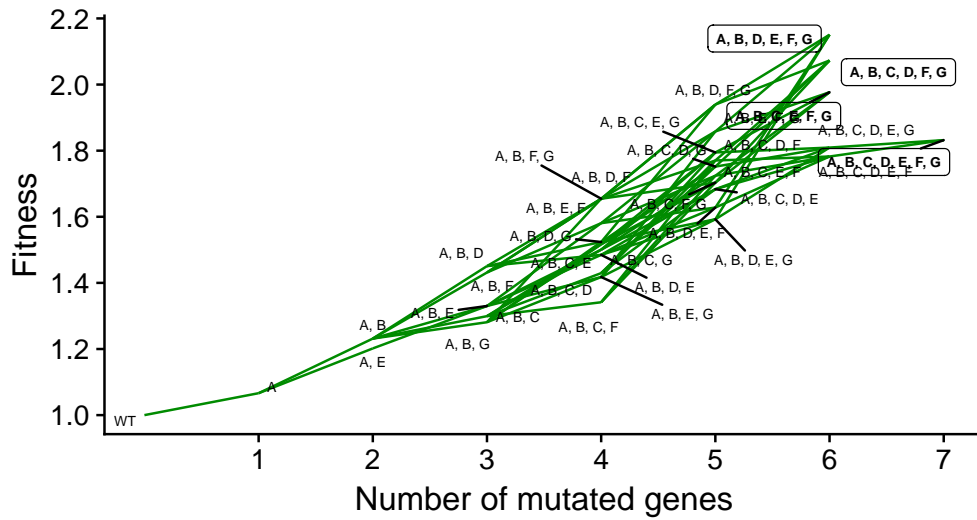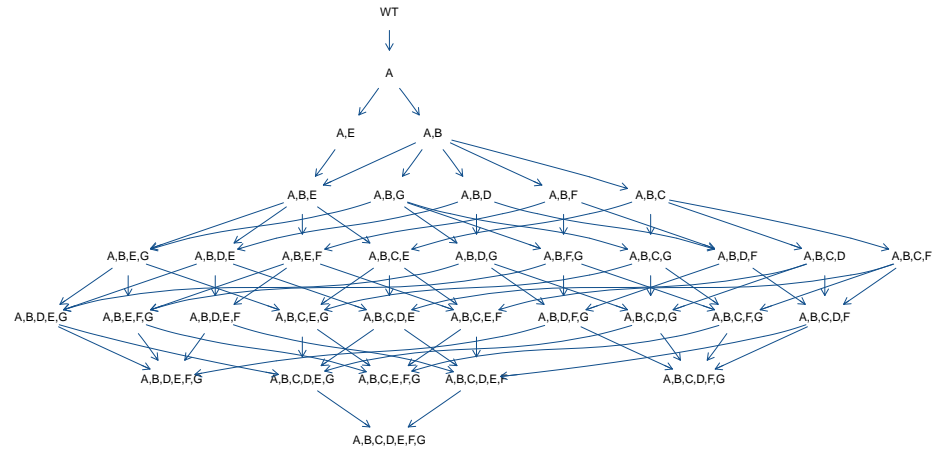

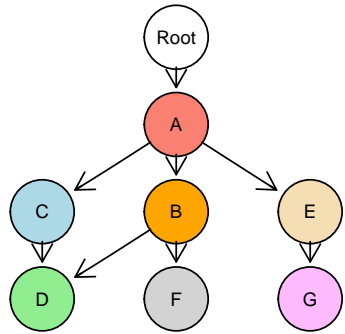

ID CQaJm9ITvQh26obo  
 acc genotypes 25  
 peaks no back 4  
 removed edges 11  
 prop rem edges 0.234

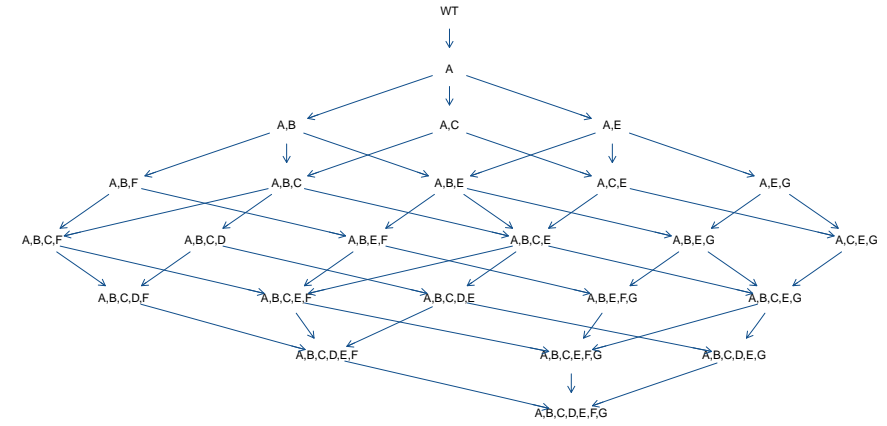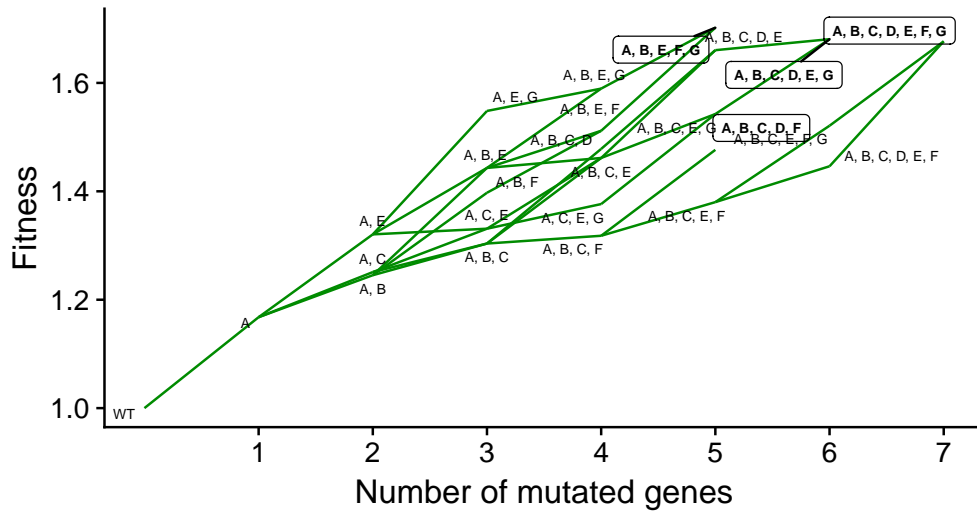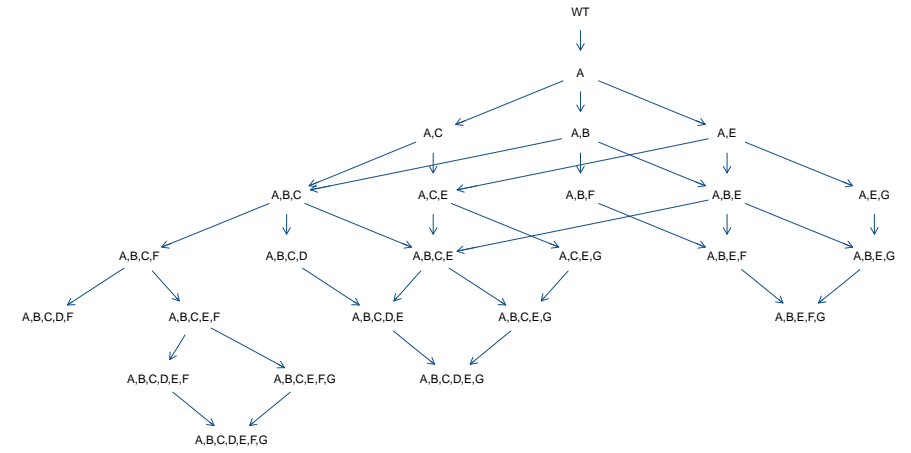

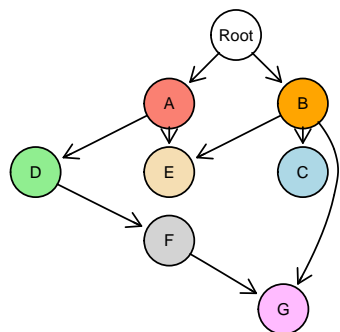

ID **cQdnO9XMvDNKOW39**  
 acc genotypes **22**  
 peaks no back **4**  
 removed edges **5**  
 prop rem edges **0.132**

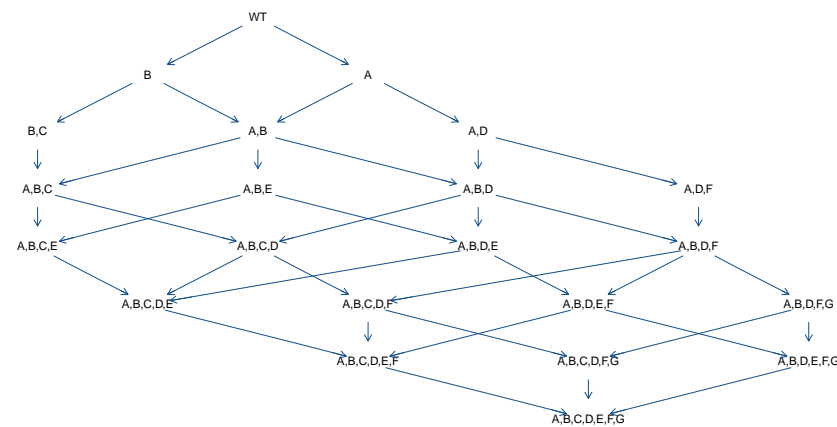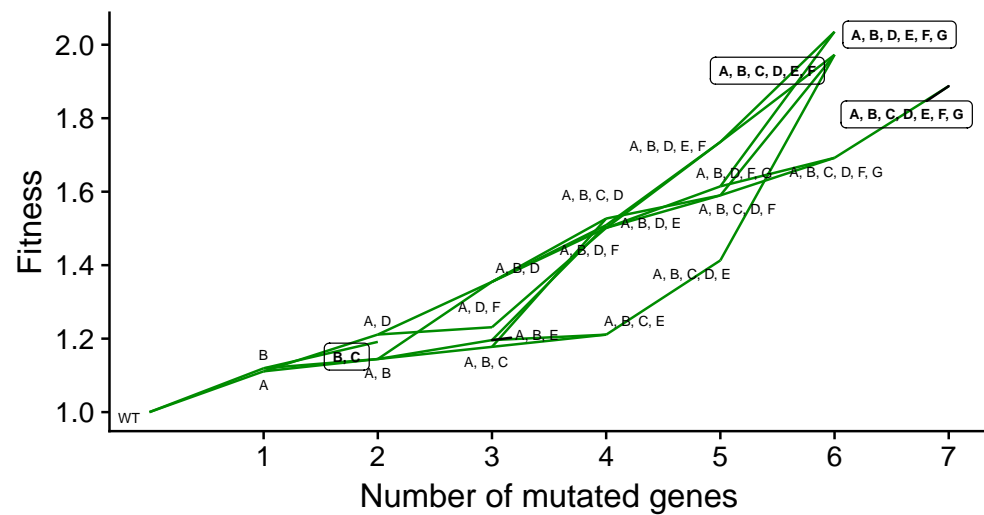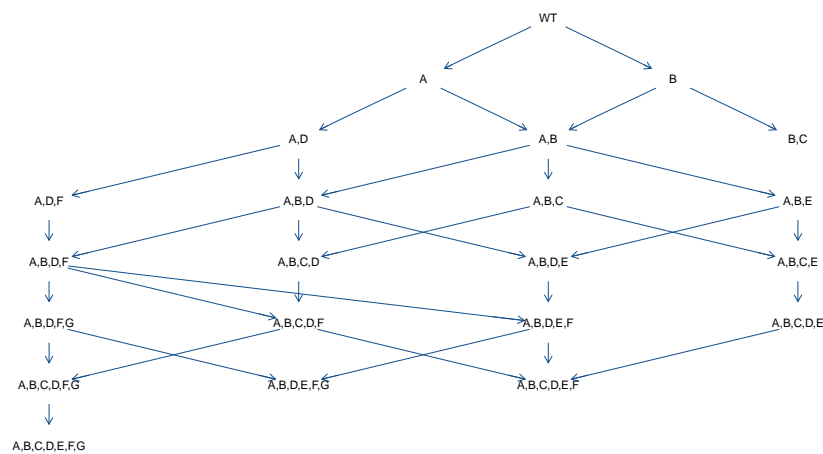

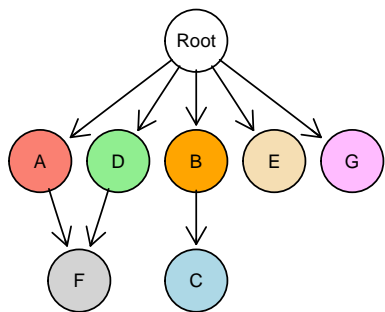

ID cwFWkTsrBGFO2dfv  
 acc genotypes 60  
 peaks no back 7  
 removed edges 29  
 prop rem edges 0.181

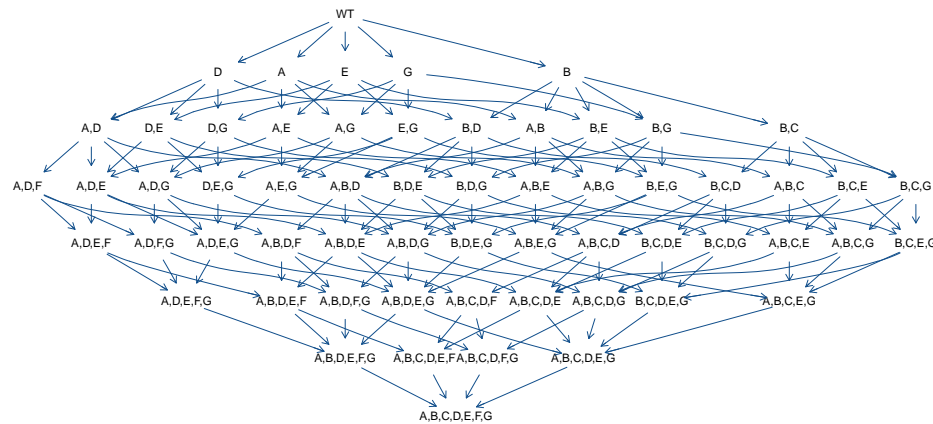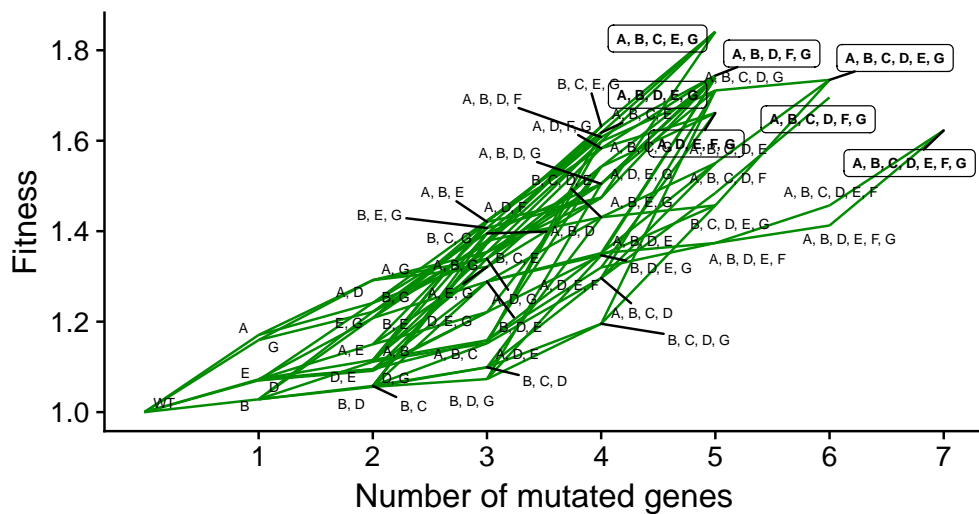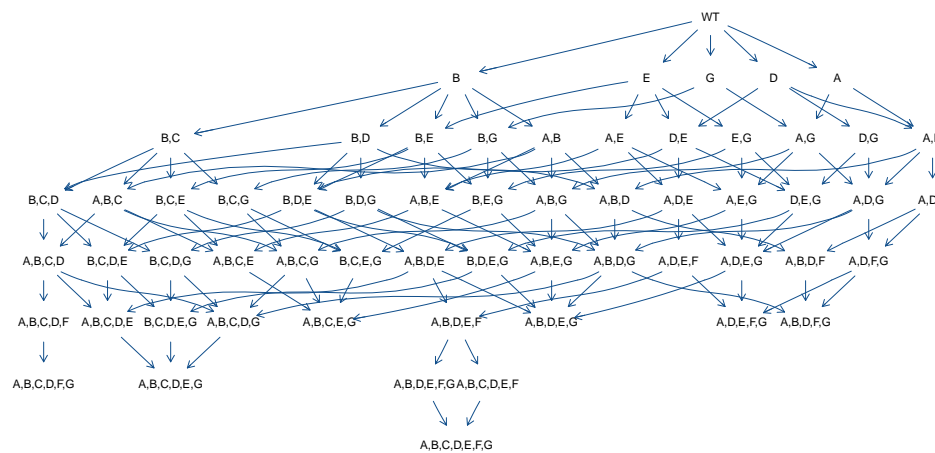

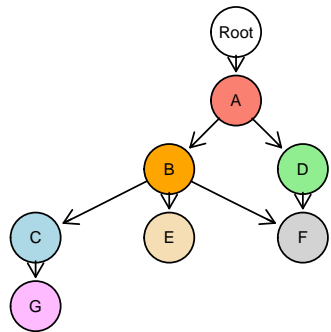

ID **D1wA9X4HhUWYpHR**  
 acc genotypes **21**  
 peaks no back **5**  
 removed edges **8**  
 prop rem edges **0.216**

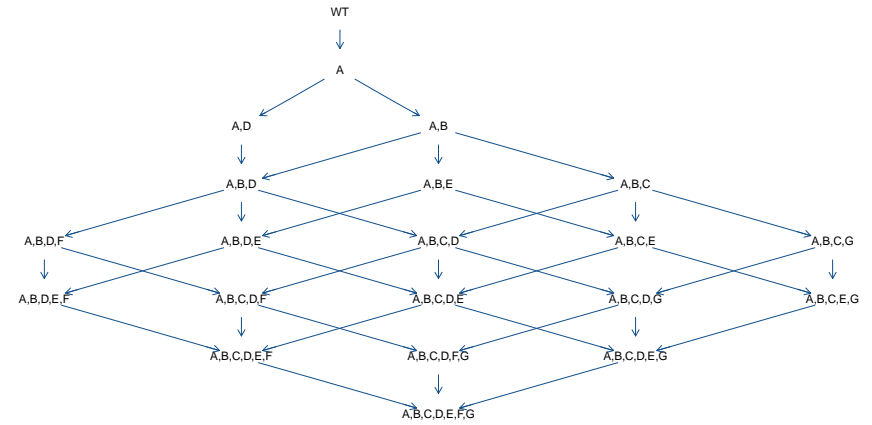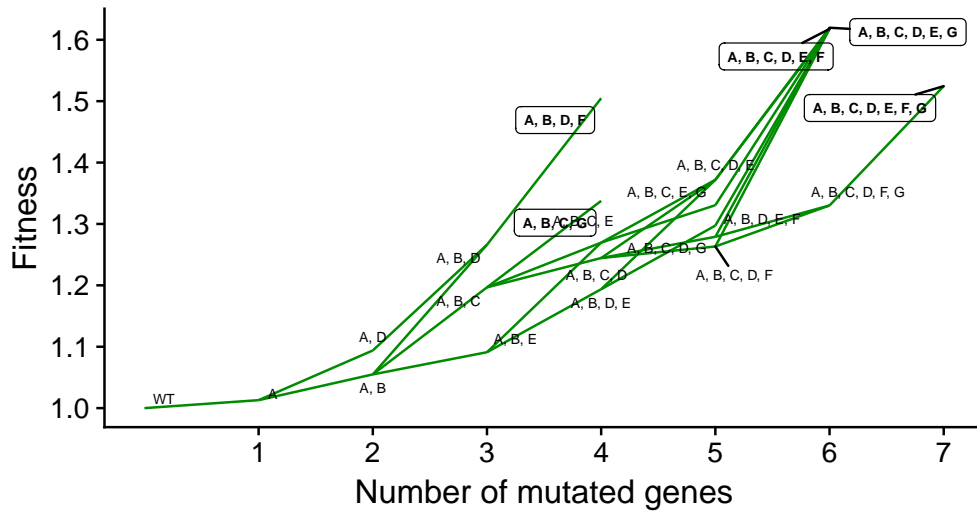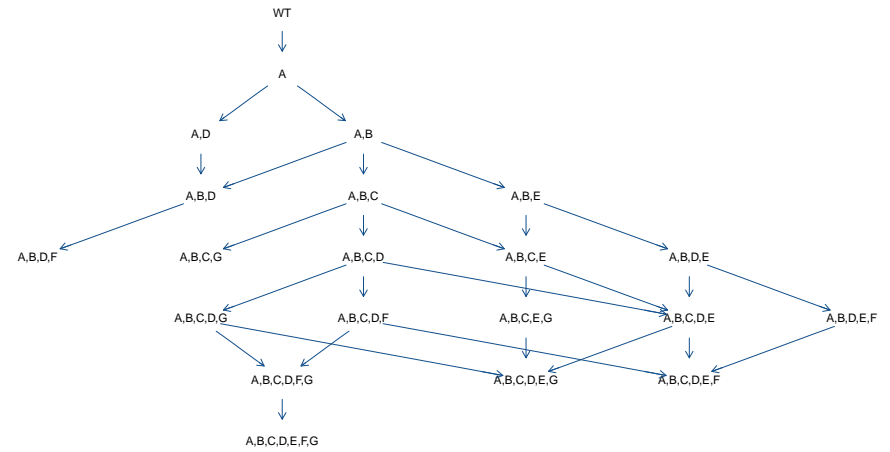

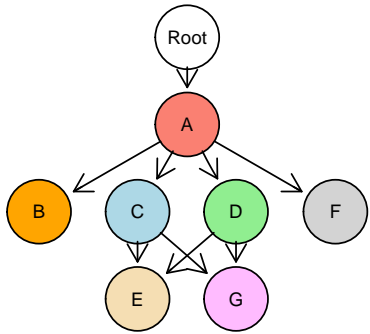

ID **DBuyPIOfmeKuioDc**  
 acc genotypes **29**  
 peaks no back **5**  
 removed edges **9**  
 prop rem edges **0.148**

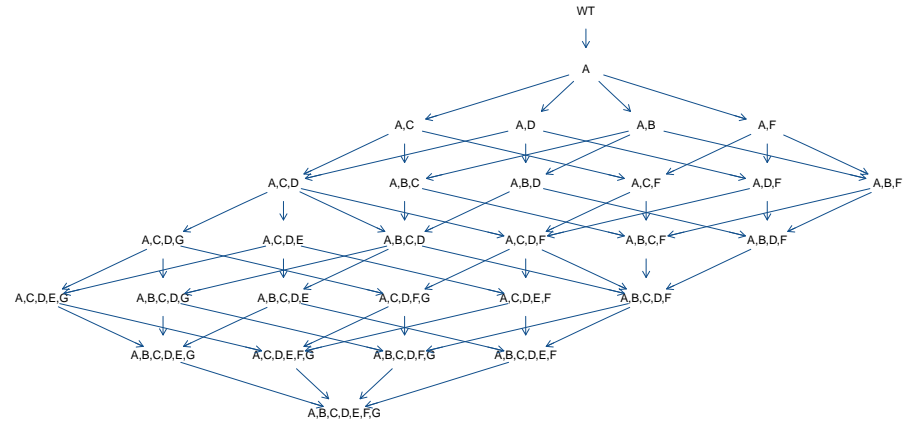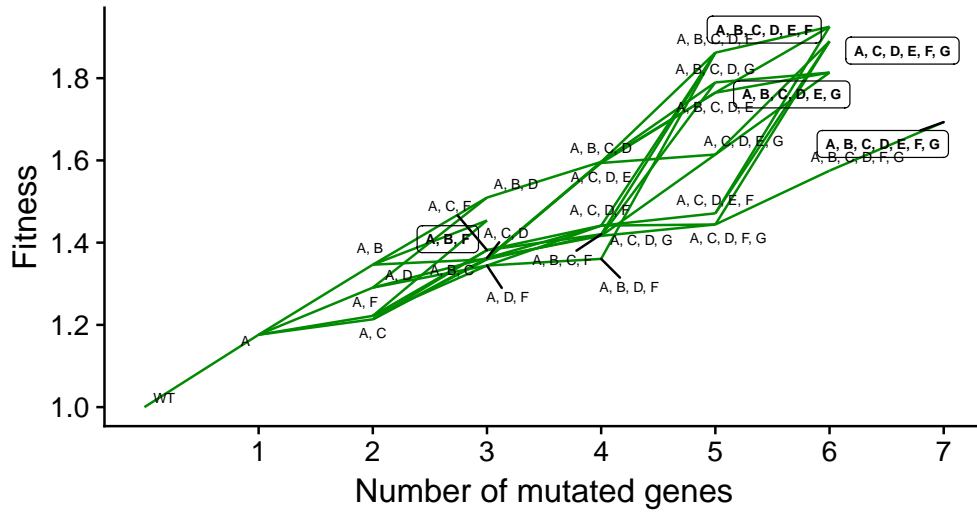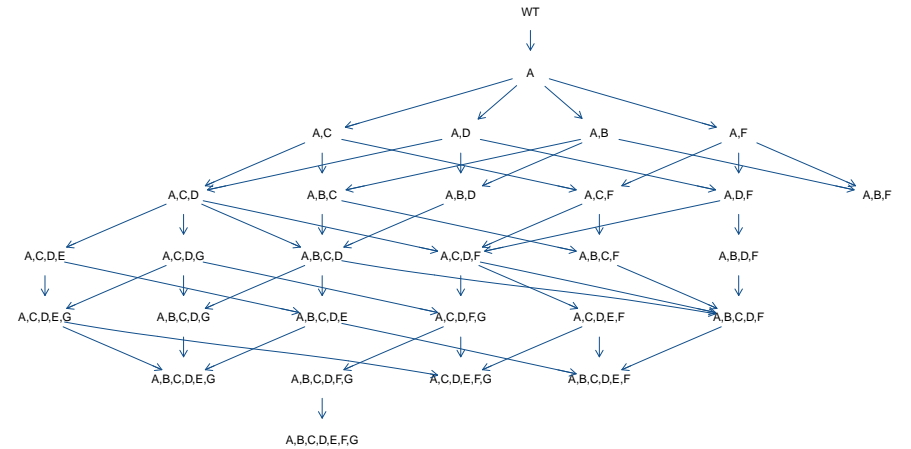

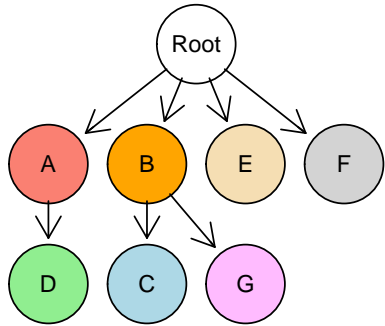

*ID* DDAFd9Y1Da3wcgyX  
*acc genotypes* 60  
*peaks no back* 8  
*removed edges* 32  
*prop rem edges* 0.2

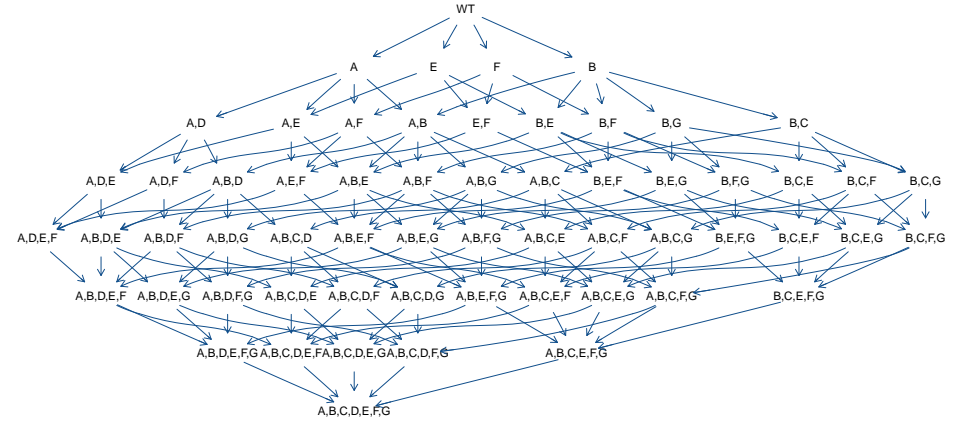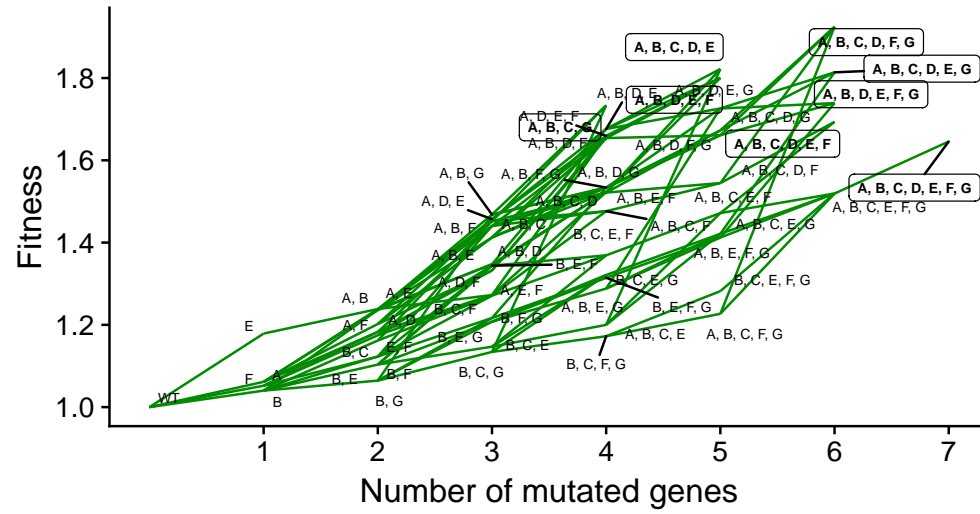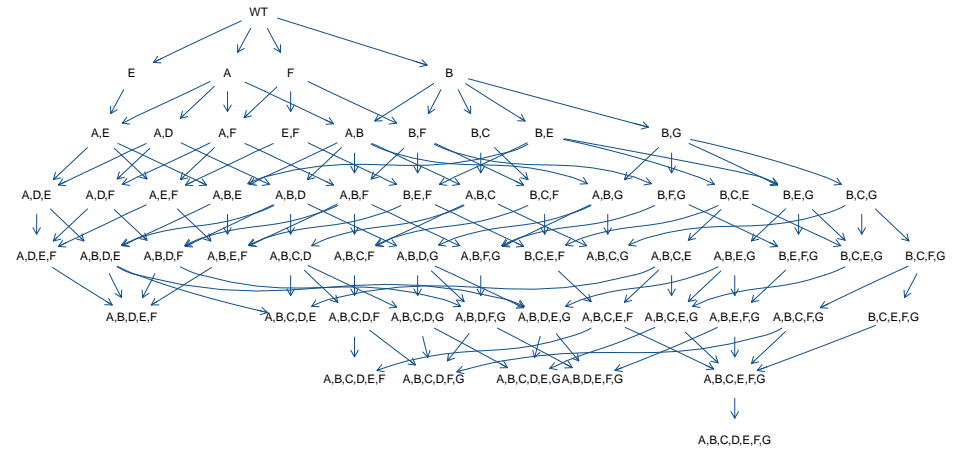



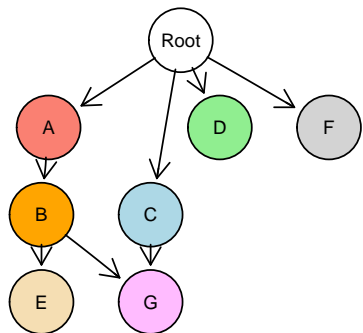

ID DE10Mak4NoN6QJYUY  
 acc genotypes 40  
 peaks no back 4  
 removed edges 13  
 prop rem edges 0.141

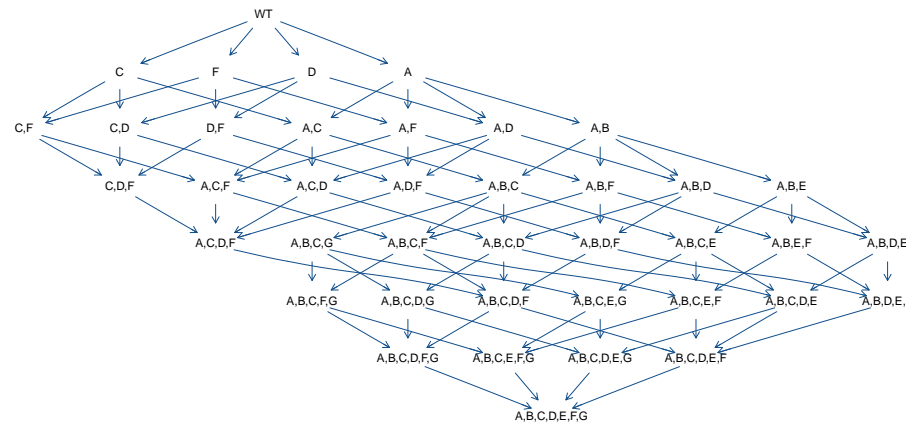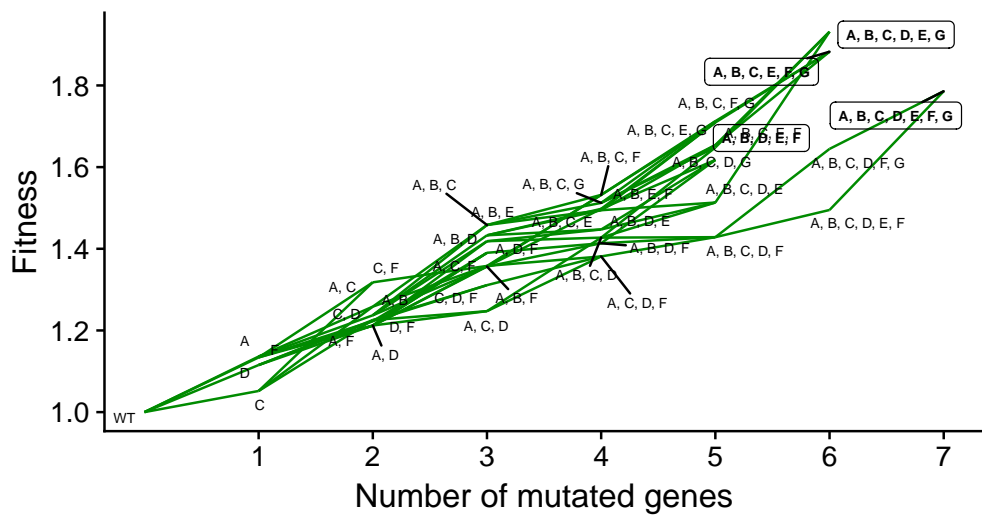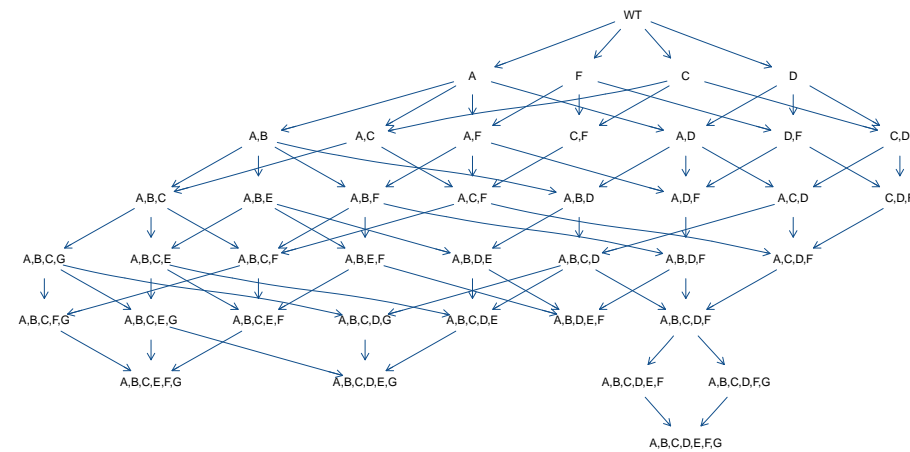

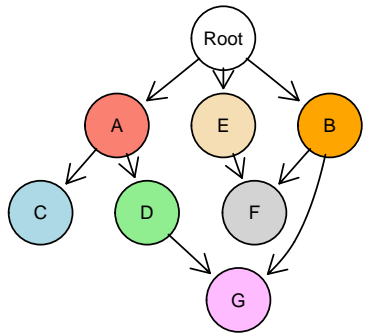

ID [dJOynYb7GGPbx910F](#)  
 acc genotypes 31  
 peaks no back 5  
 removed edges 12  
 prop rem edges 0.19

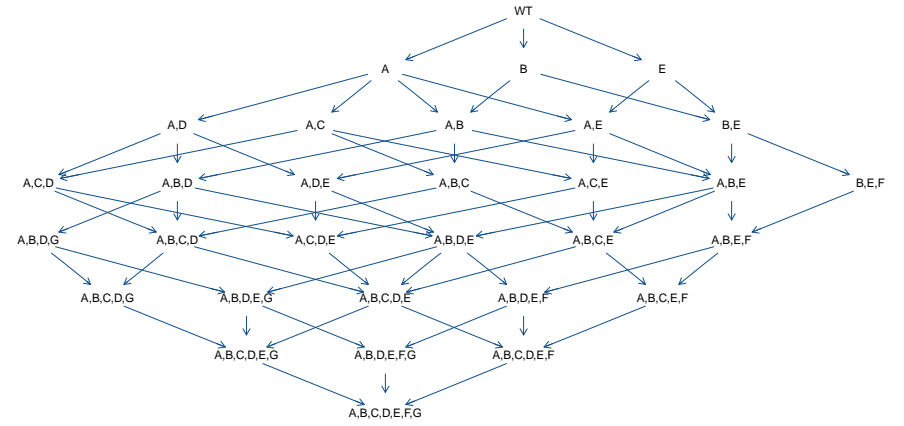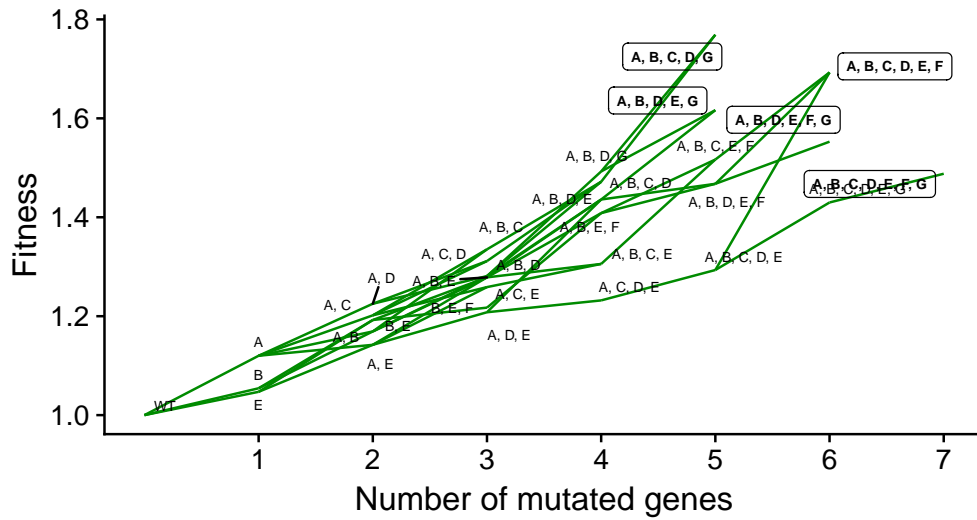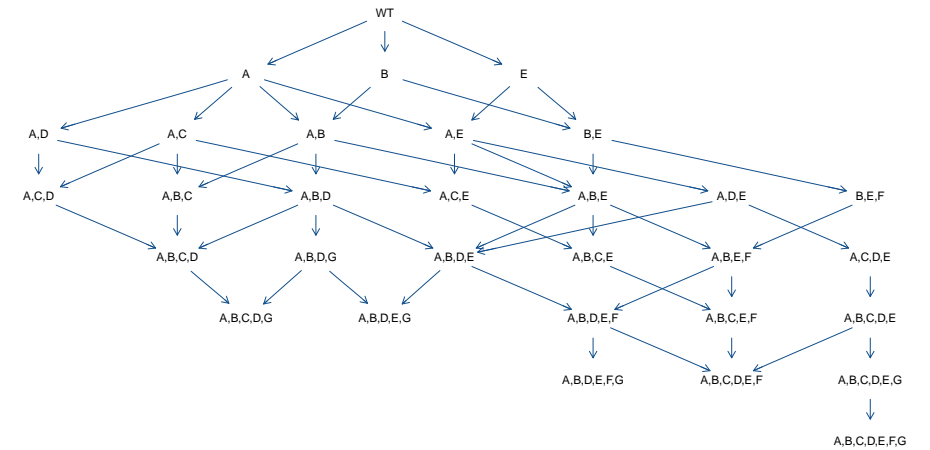

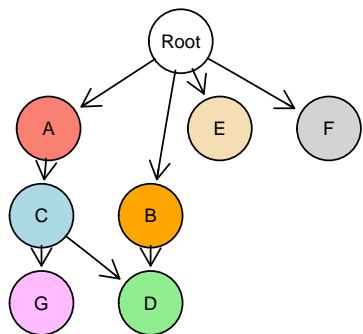

ID **DM6wSFi5wdVWUqjH**  
 acc genotypes **40**  
 peaks no back **6**  
 removed edges **12**  
 prop rem edges **0.13**

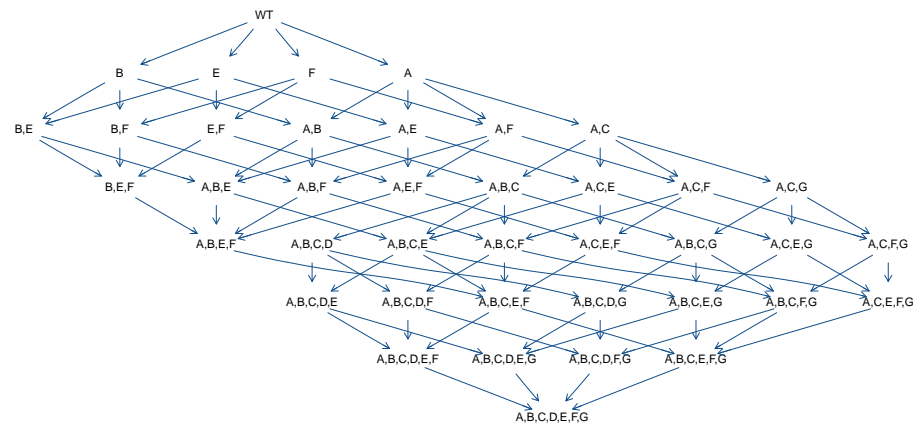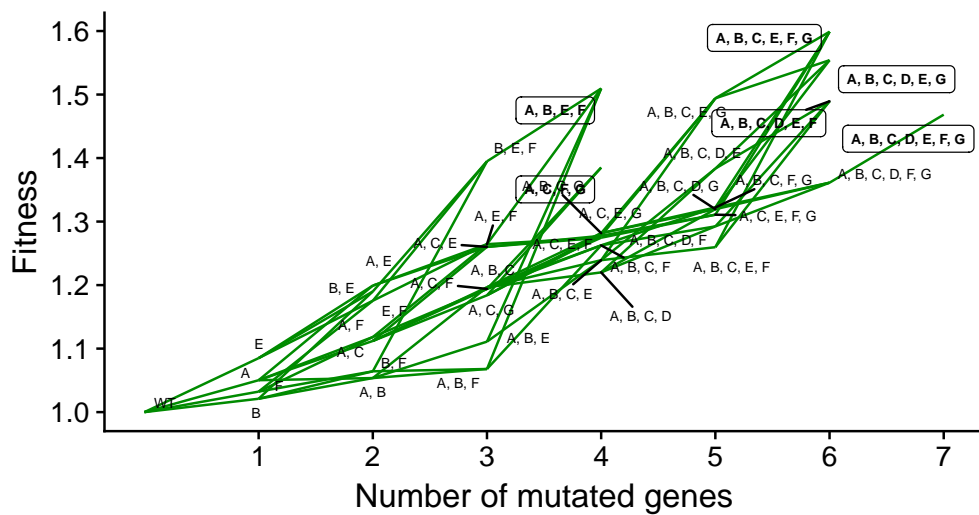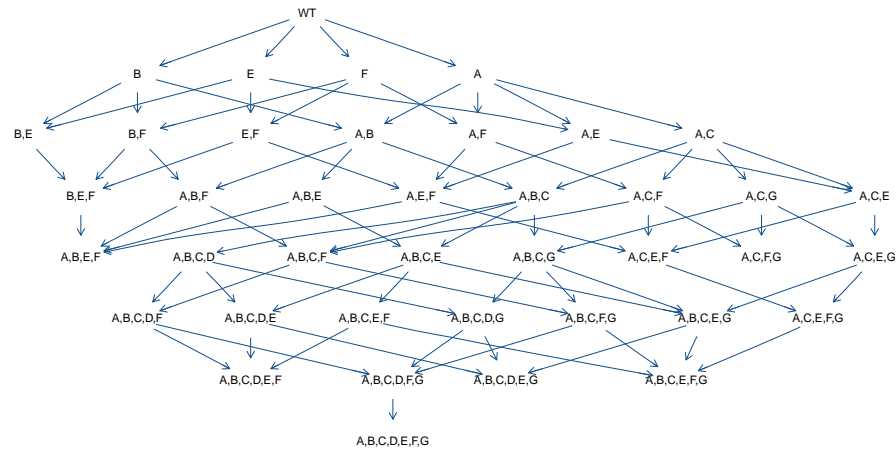

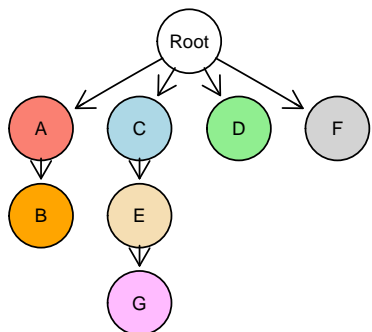

ID **dO8v6amgefufggoE**  
 acc genotypes **48**  
 peaks no back **7**  
 removed edges **24**  
 prop rem edges **0.207**

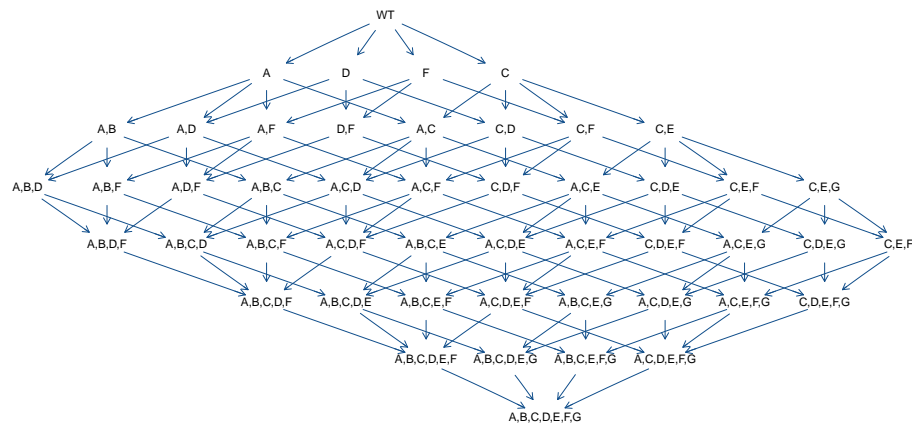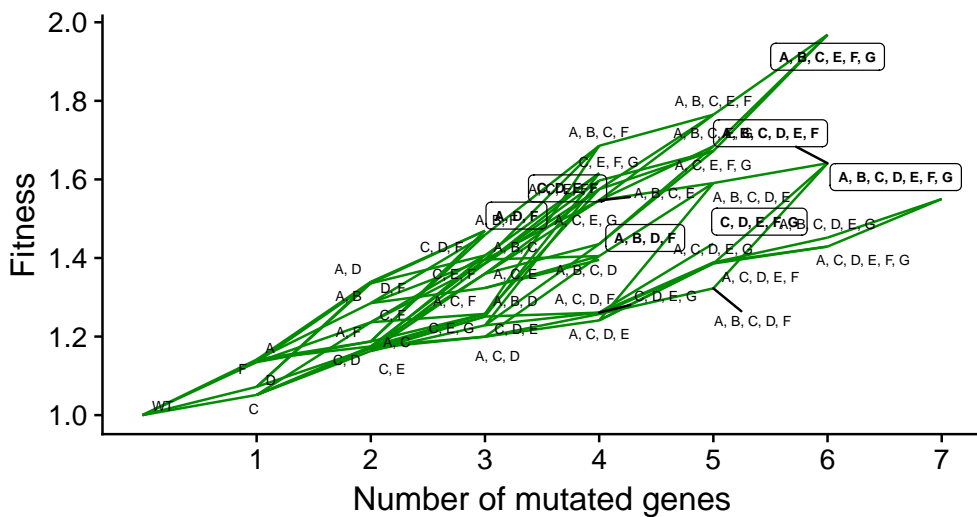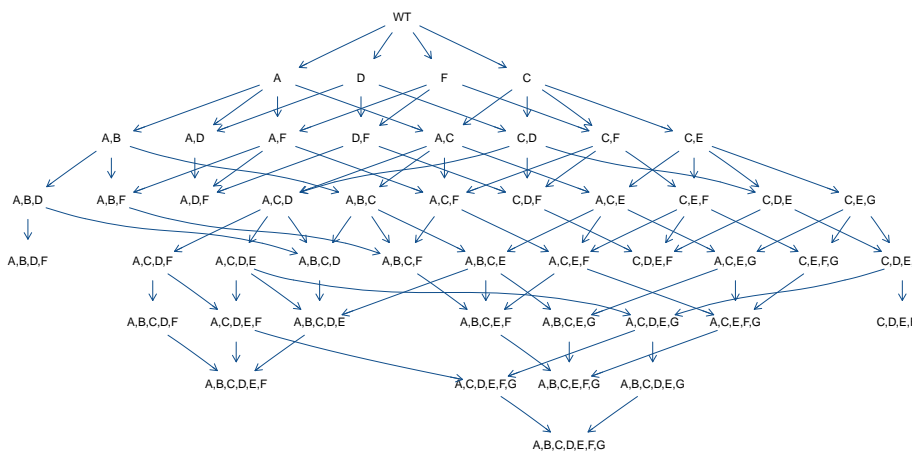

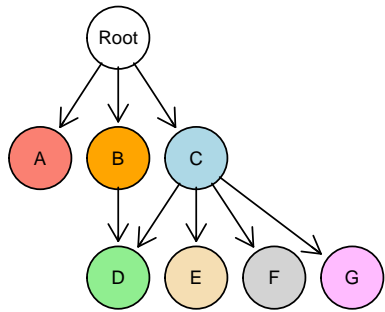

ID dPD0h3Us3MOoJnT  
 acc genotypes 52  
 peaks no back 9  
 removed edges 26  
 prop rem edges 0.191

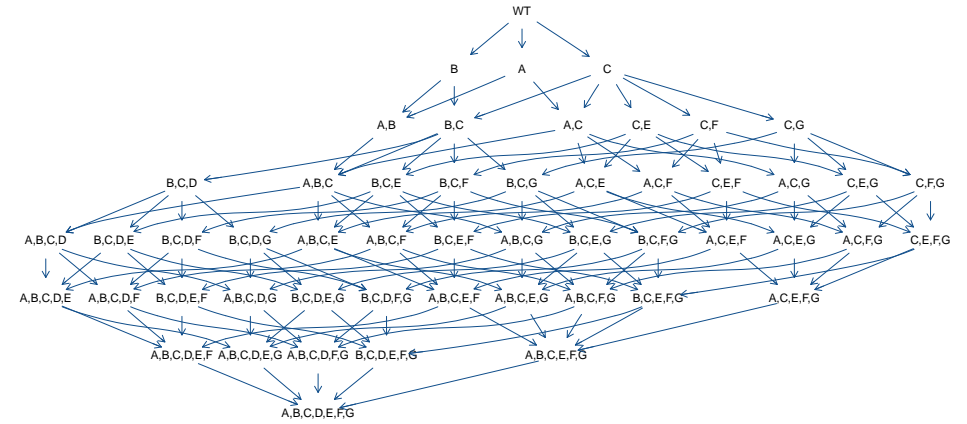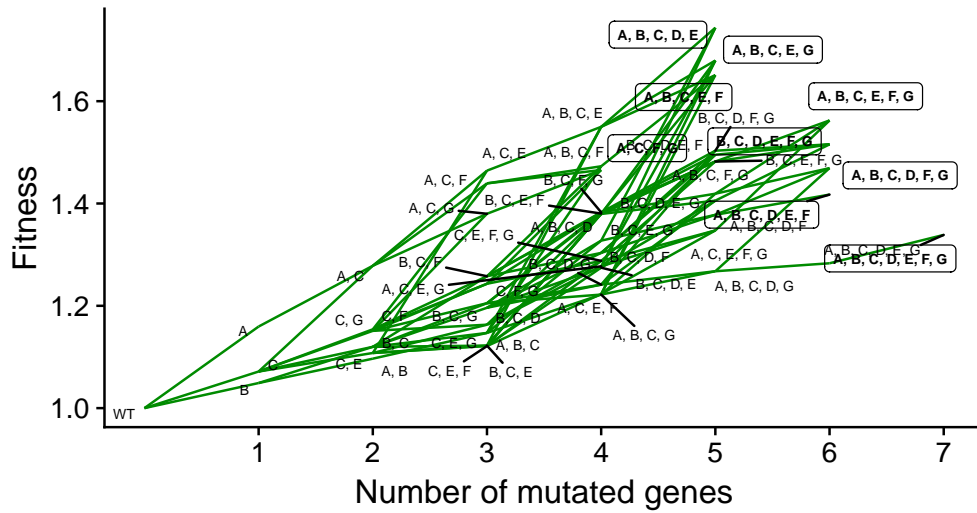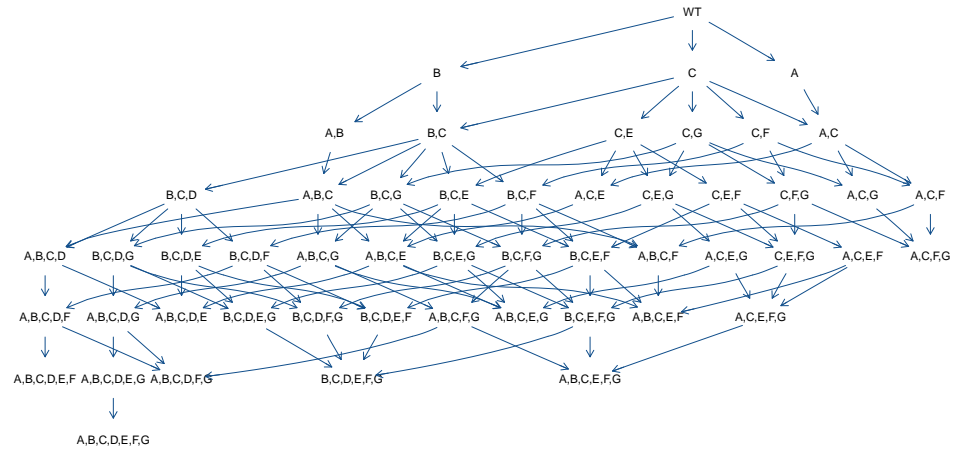

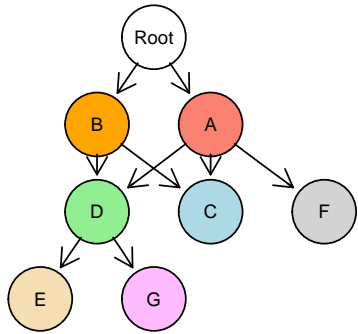

ID E4Ngwmi2x89lda9  
 acc genotypes 24  
 peaks no back 4  
 removed edges 4  
 prop rem edges 0.087

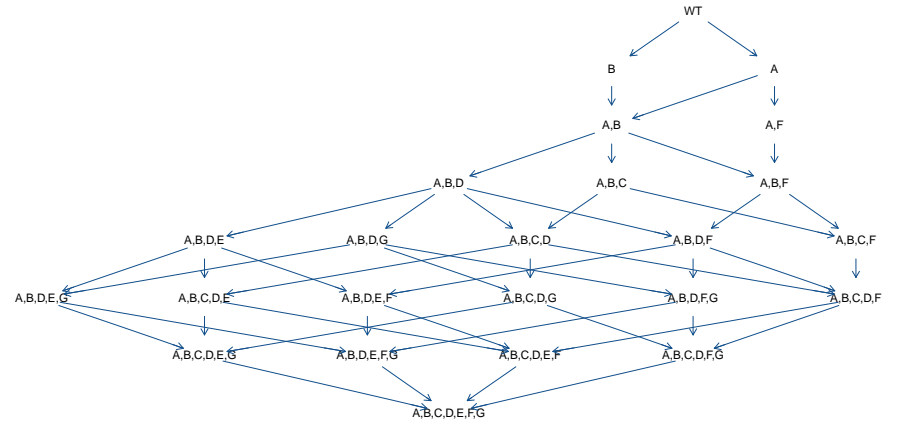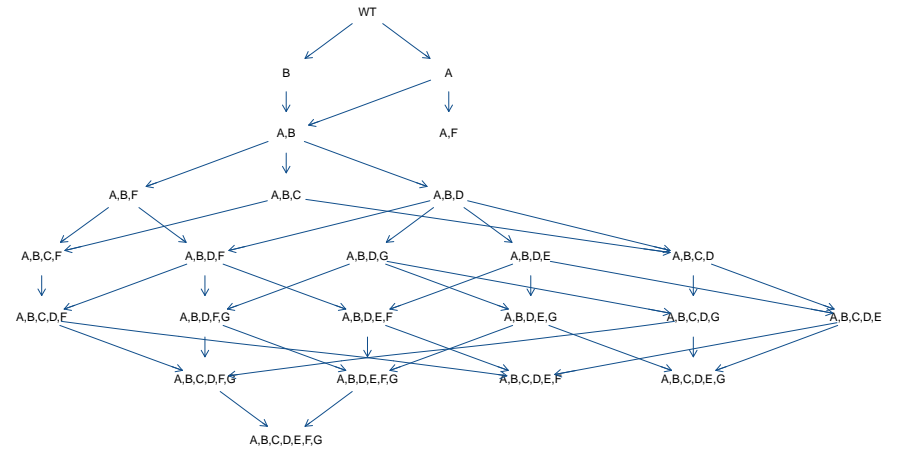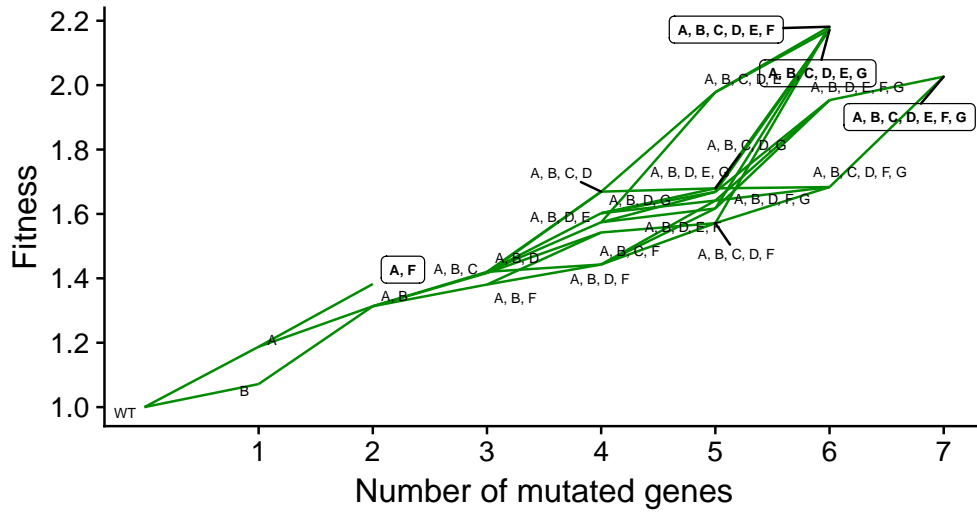

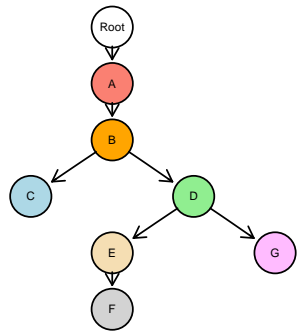

ID ejQdvM3QTzcrMUgC  
 acc genotypes 16  
 peaks no back 4  
 removed edges 4  
 prop rem edges 0.16

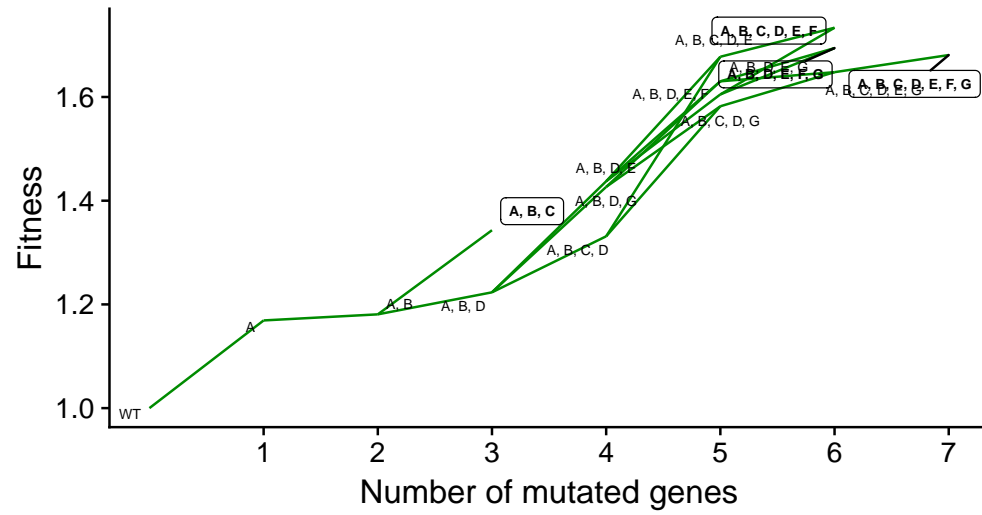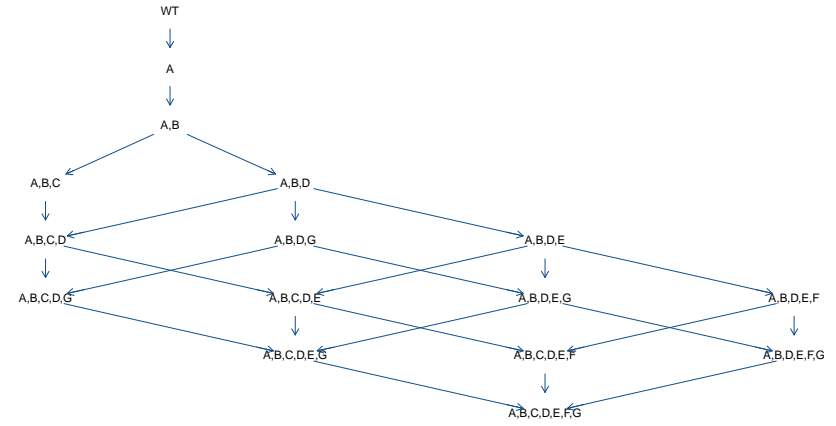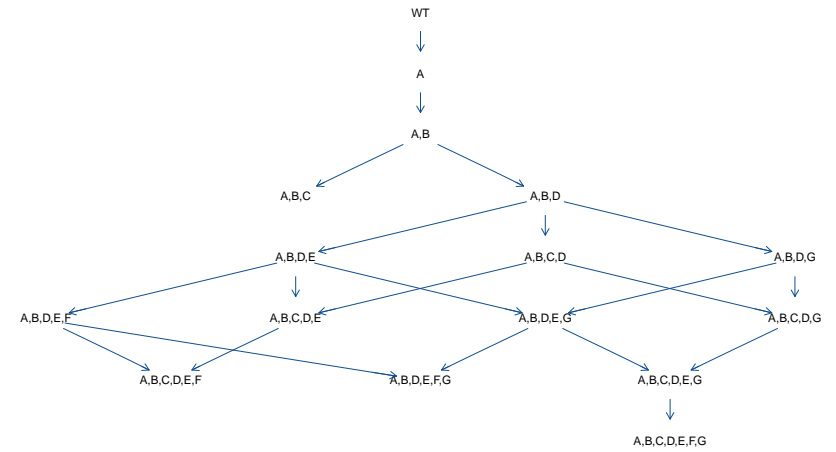

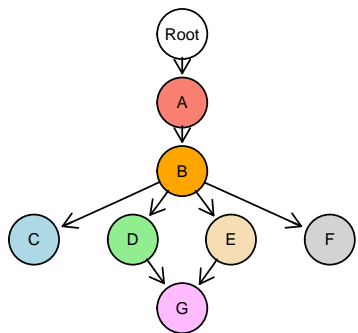

ID eNAunG4FXTpwgDbz  
 acc genotypes 22  
 peaks no back 4  
 removed edges 9  
 prop rem edges 0.214

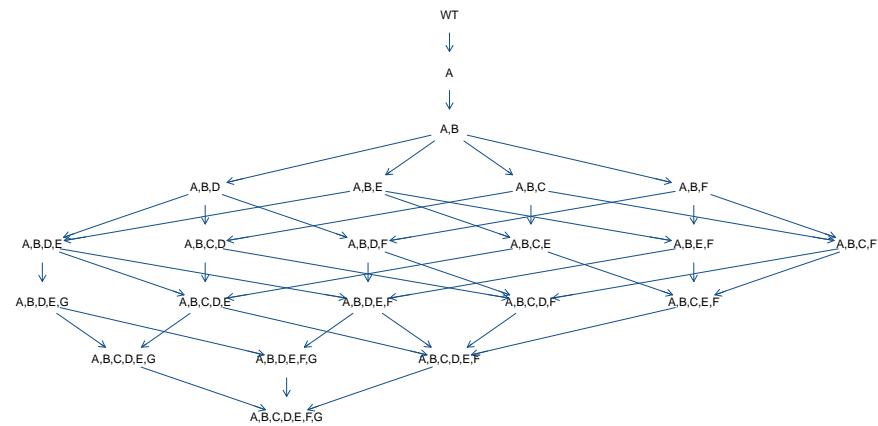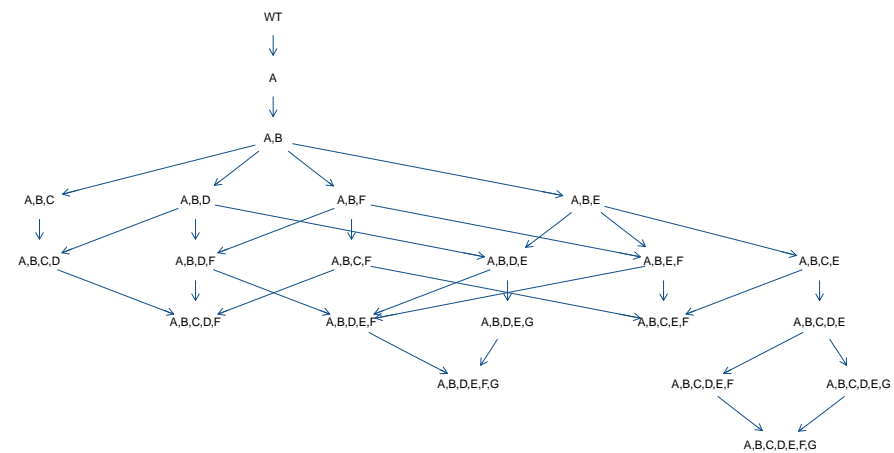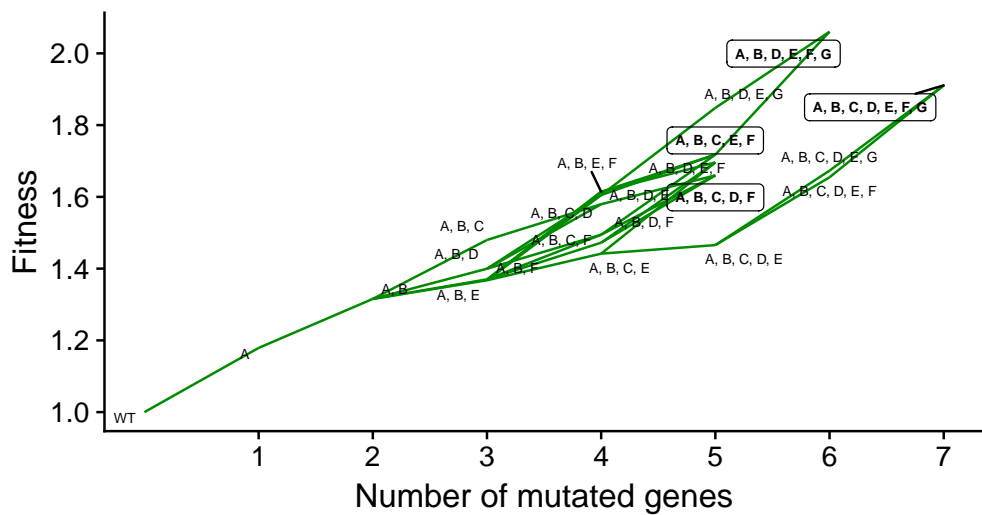



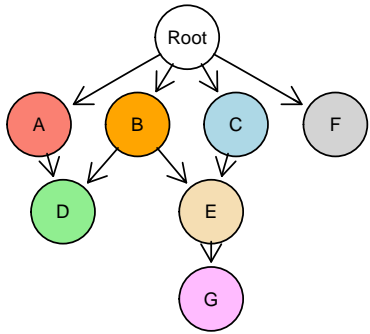

ID eO96nNikZRtCYFxB  
 acc genotypes 32  
 peaks no back 6  
 removed edges 10  
 prop rem edges 0.152

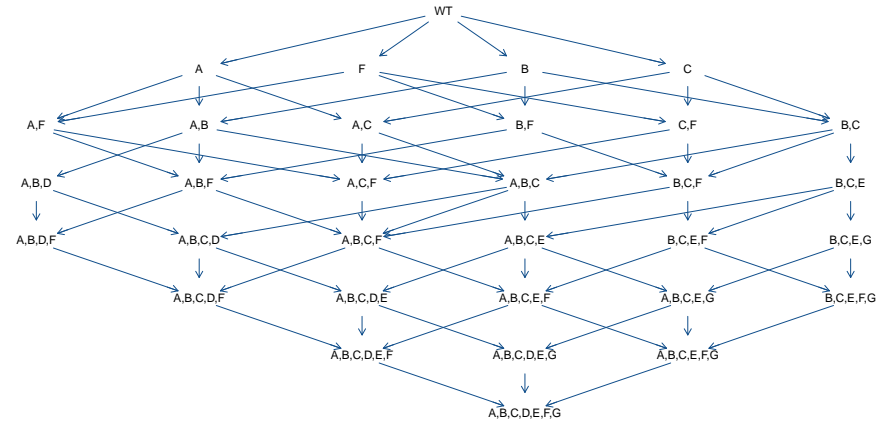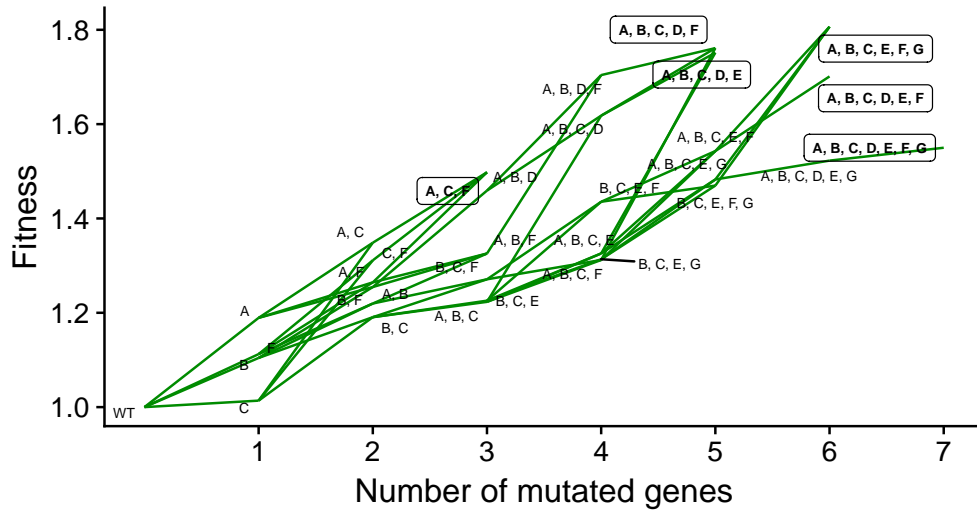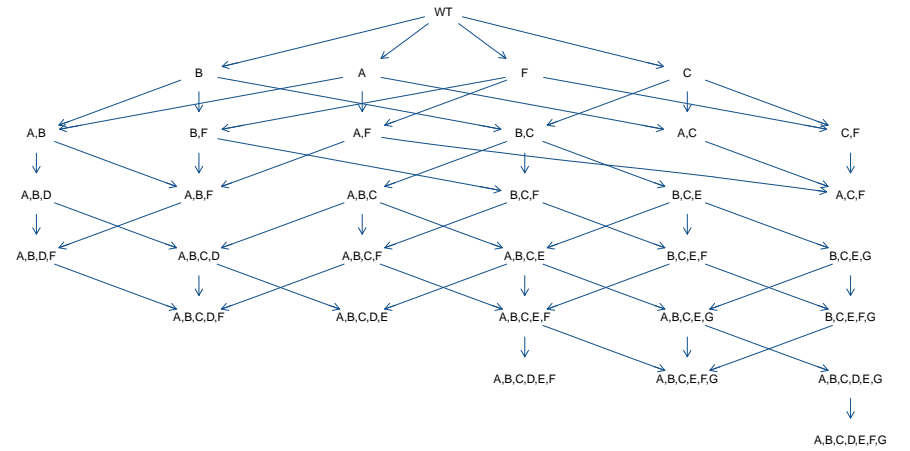

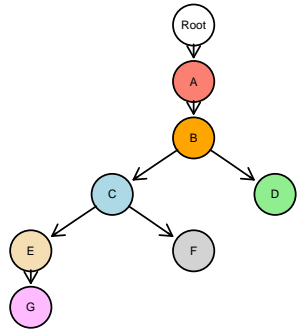

ID **EtcHaQBILbjzQ**  
 acc genotypes **16**  
 peaks no back 2  
 removed edges 2  
 prop rem edges 0.08

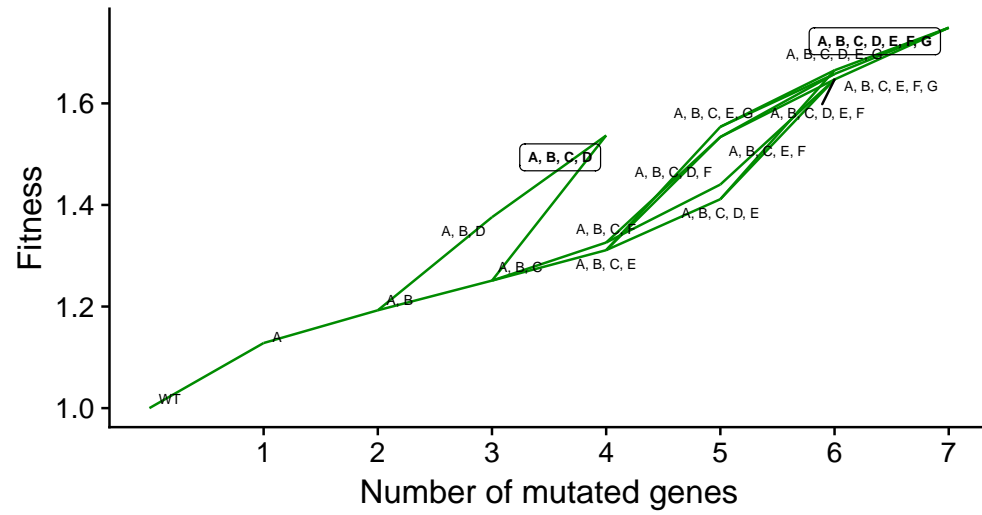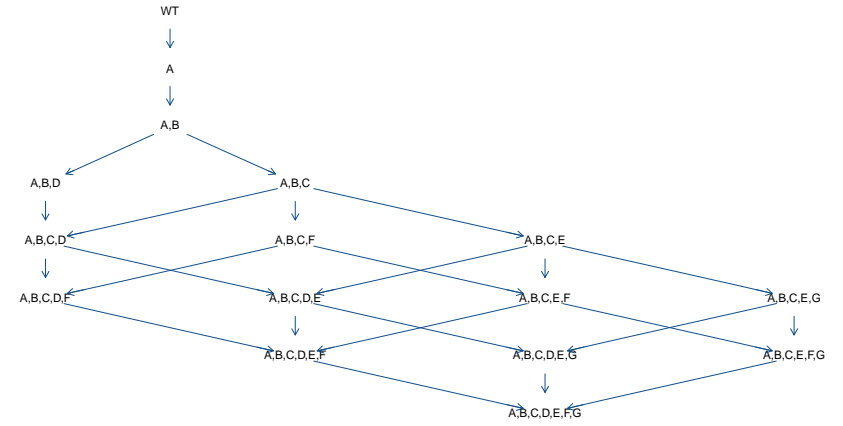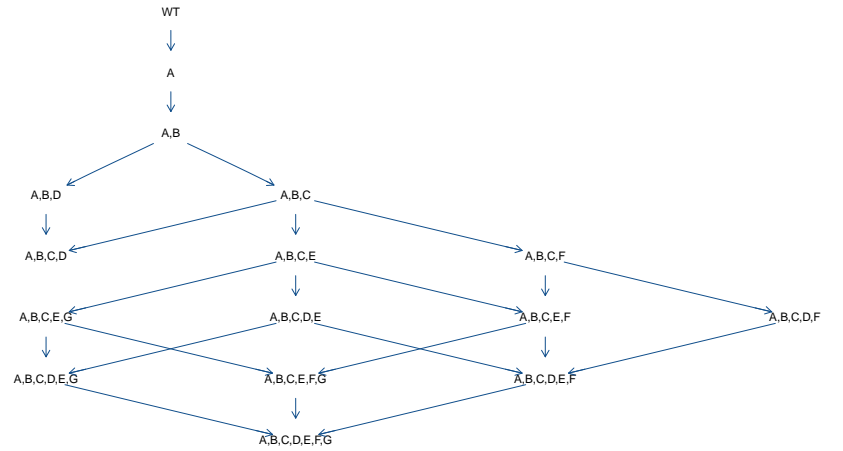

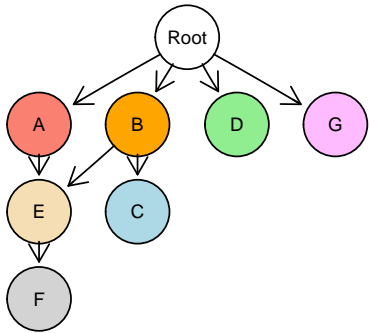

ID f103IT84L6WhInZWQ  
 acc genotypes 40  
 peaks no back 5  
 removed edges 13  
 prop rem edges 0.141

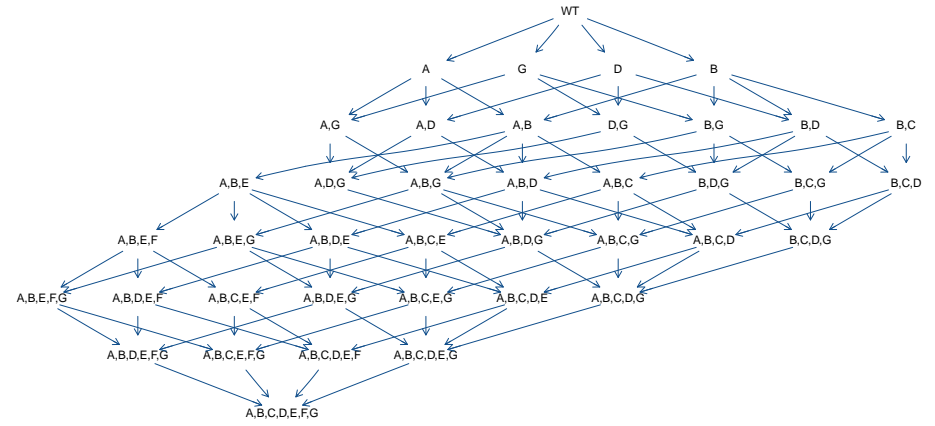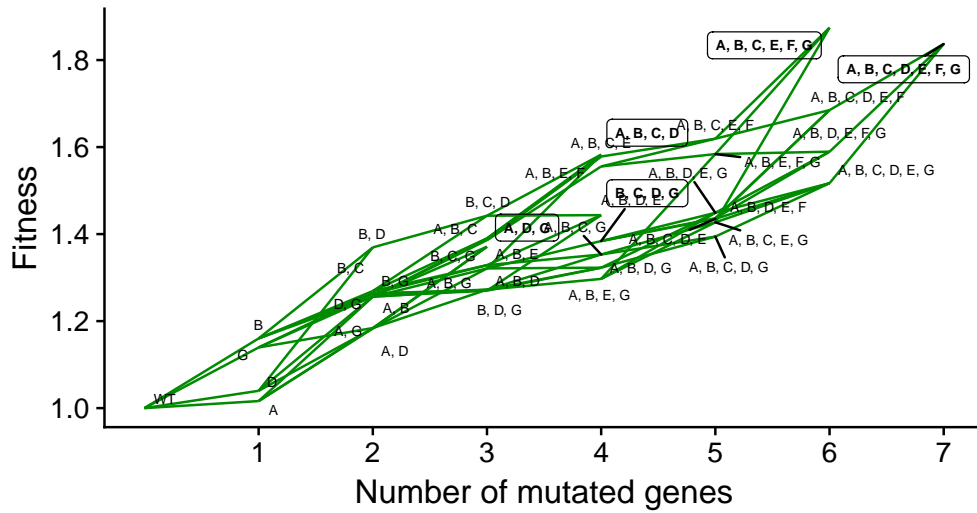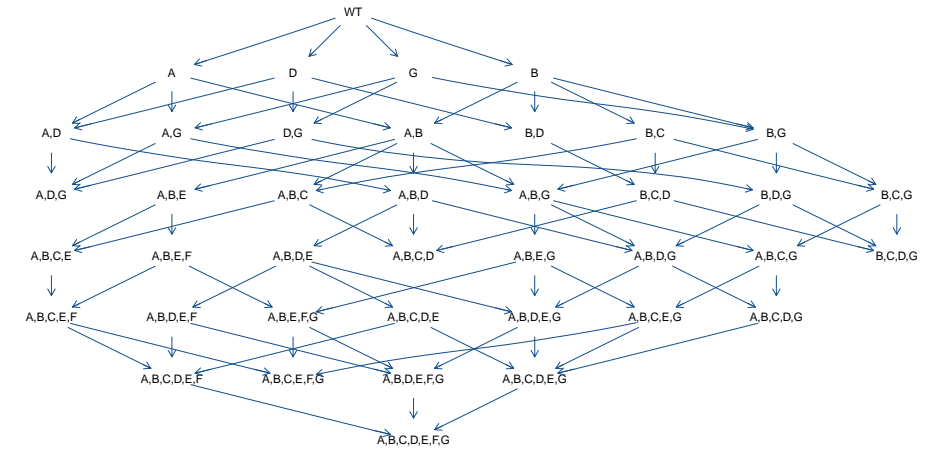

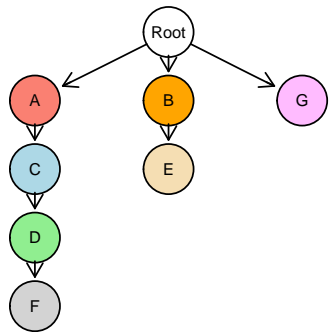

ID **Fhypo3U5P7710LvXb**  
 acc genotypes **30**  
 peaks no back **6**  
 removed edges **8**  
 prop rem edges **0.136**

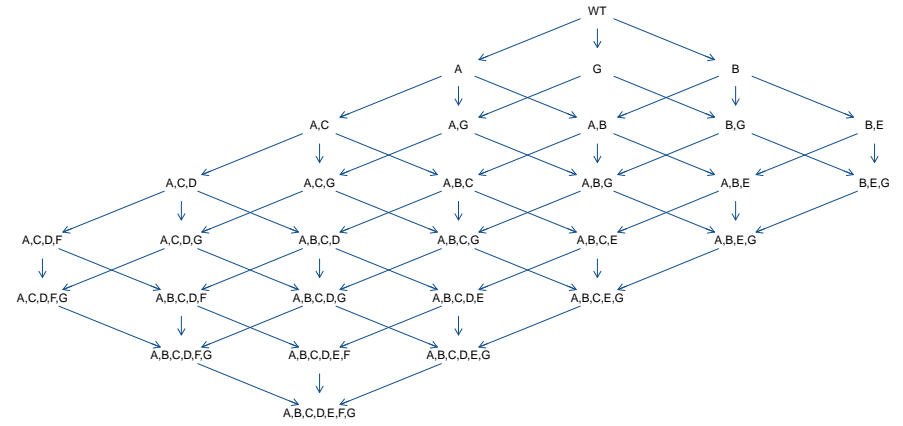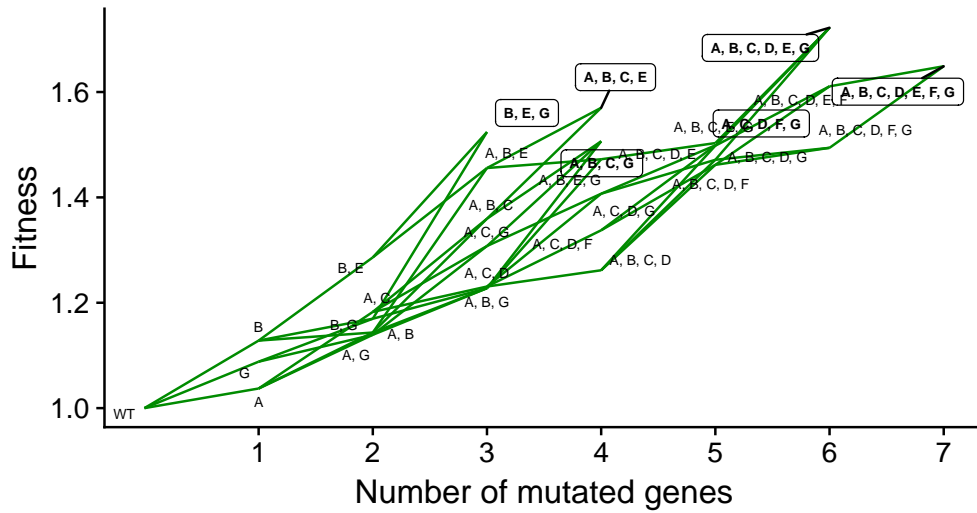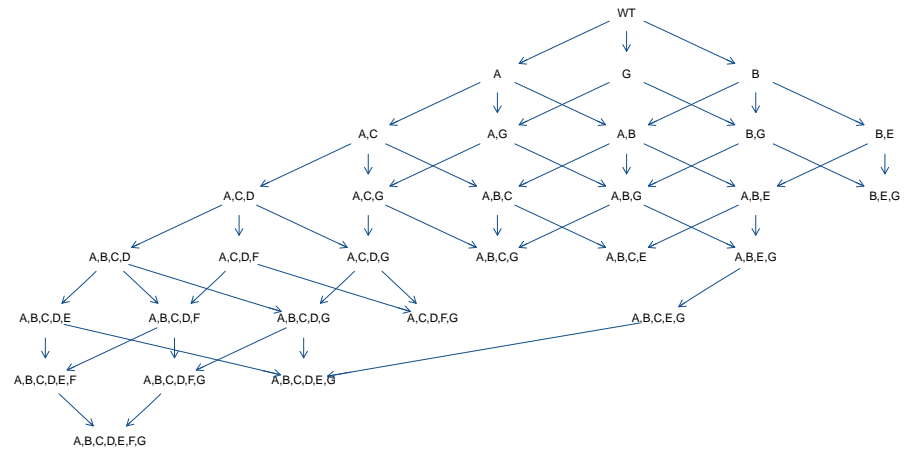

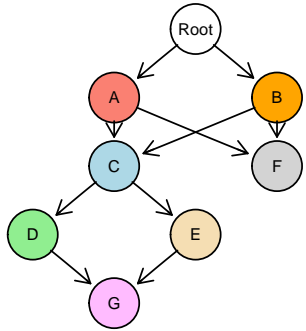

ID **FJcdcp4ZT1UXIBCC**  
 acc genotypes **15**  
 peaks no back **3**  
 removed edges **3**  
 prop rem edges **0.136**

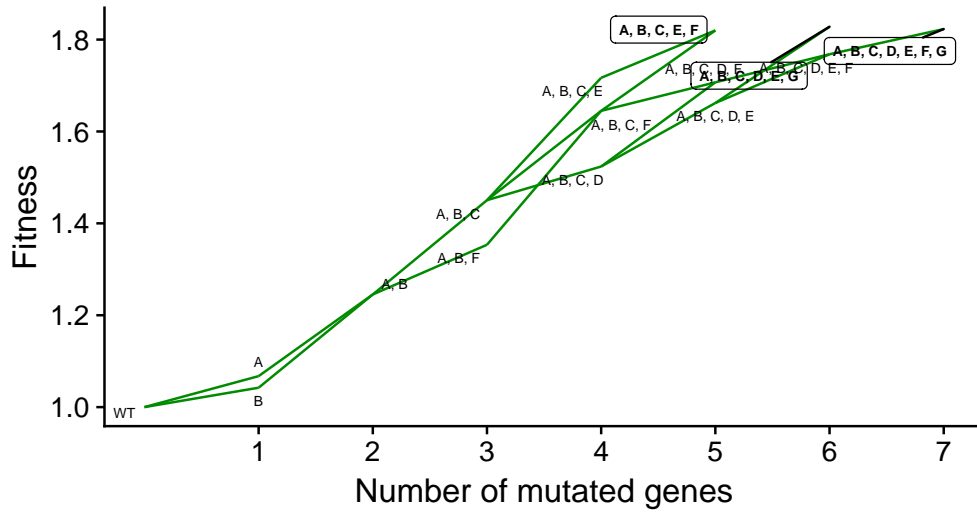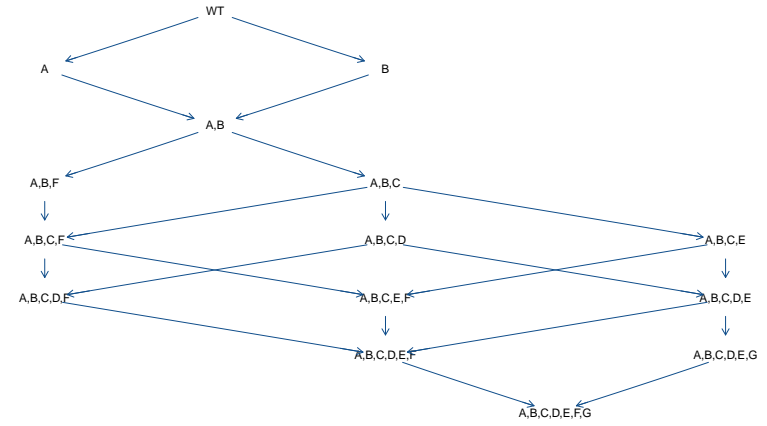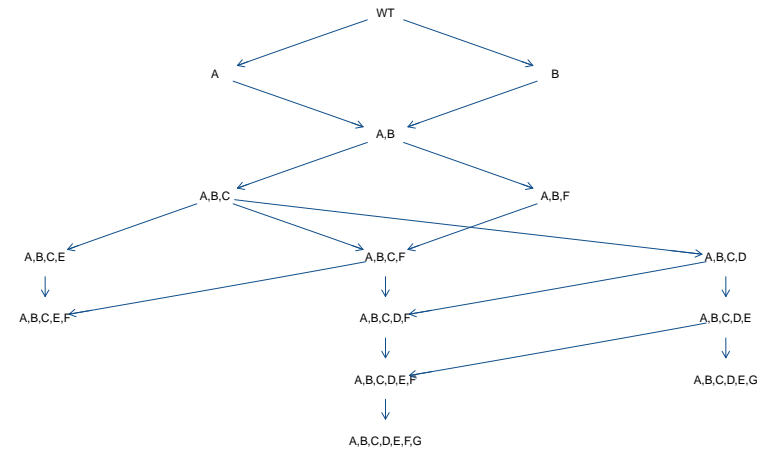

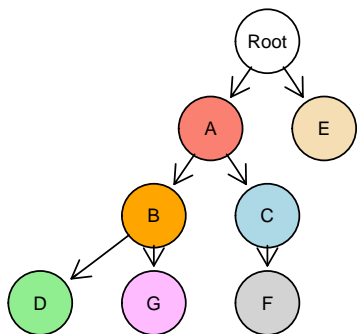

ID **FMNyhmR9SOSPPYf**  
 acc genotypes **32**  
 peaks no back **6**  
 removed edges **15**  
 prop rem edges **0.221**

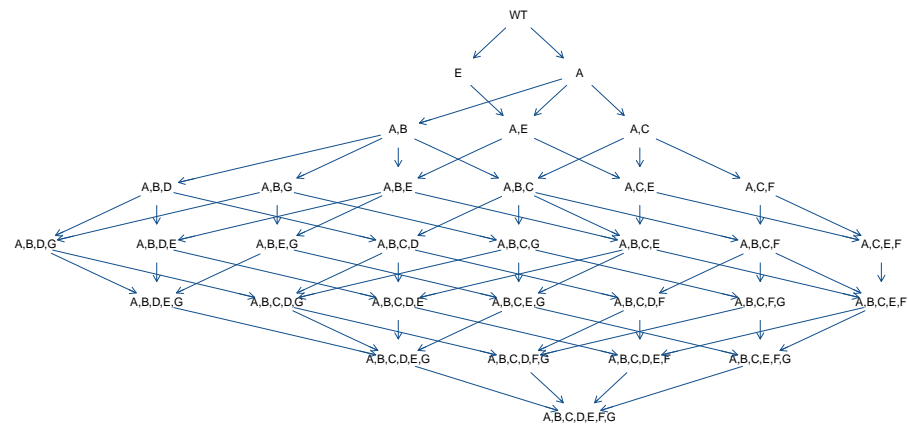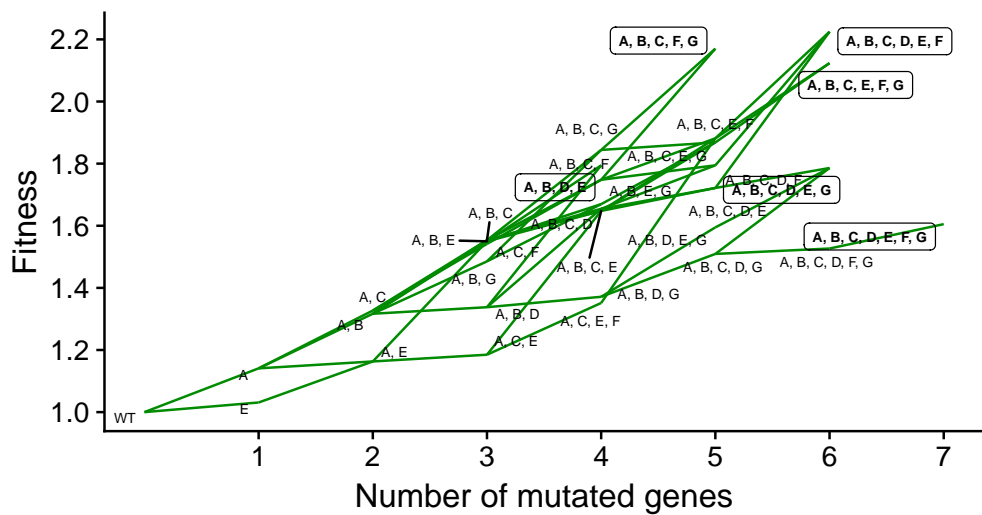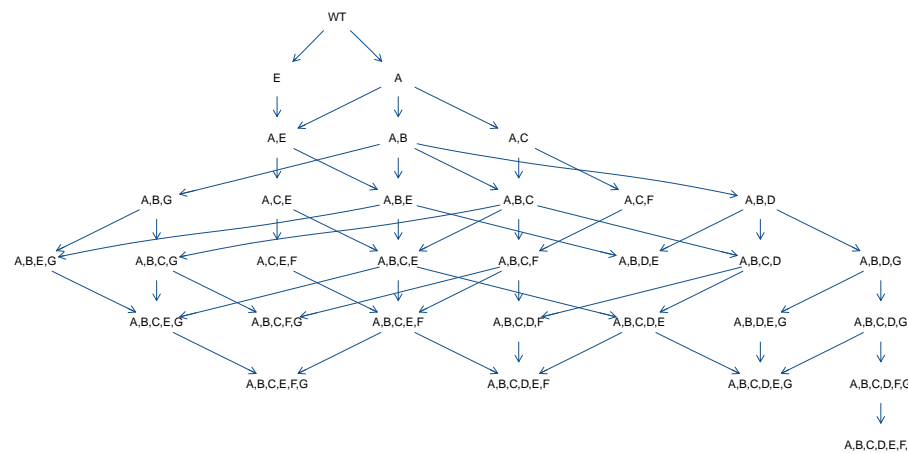

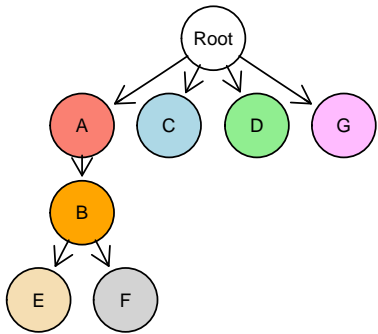

ID **FTNjYxRURUcCxqz9**  
 acc genotypes **48**  
 peaks no back **9**  
 removed edges **27**  
 prop rem edges **0.225**

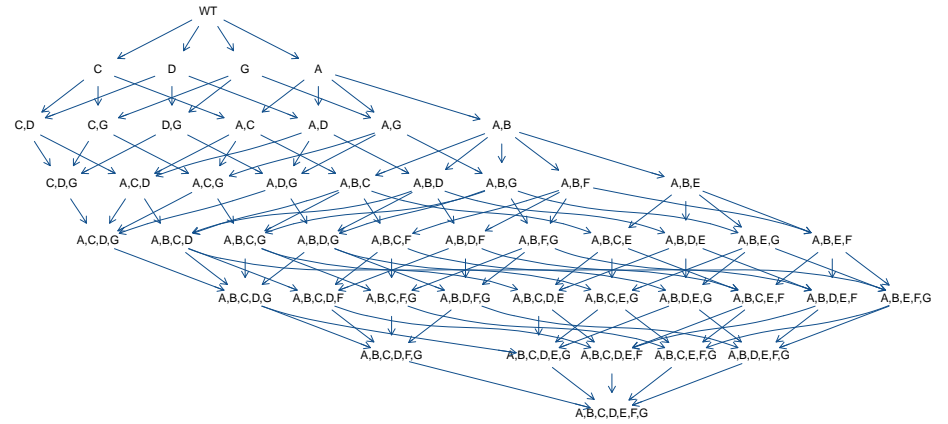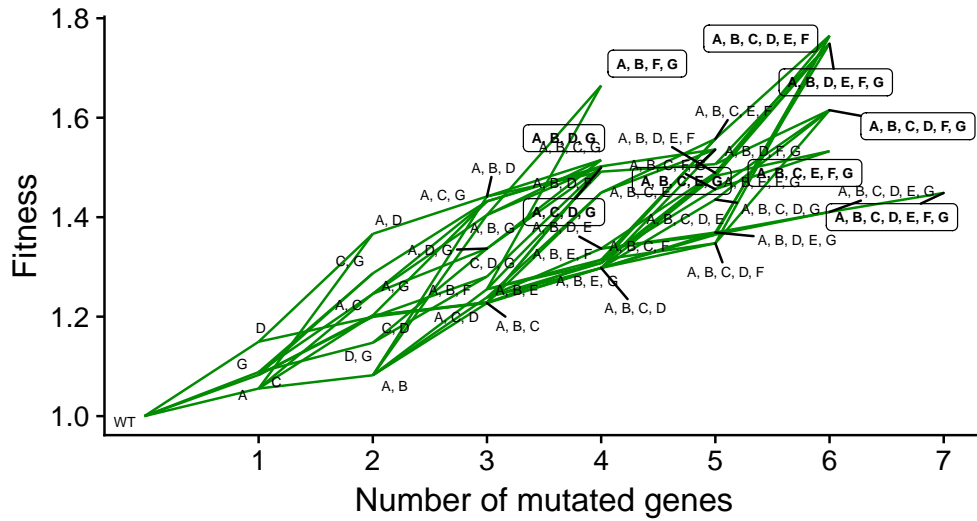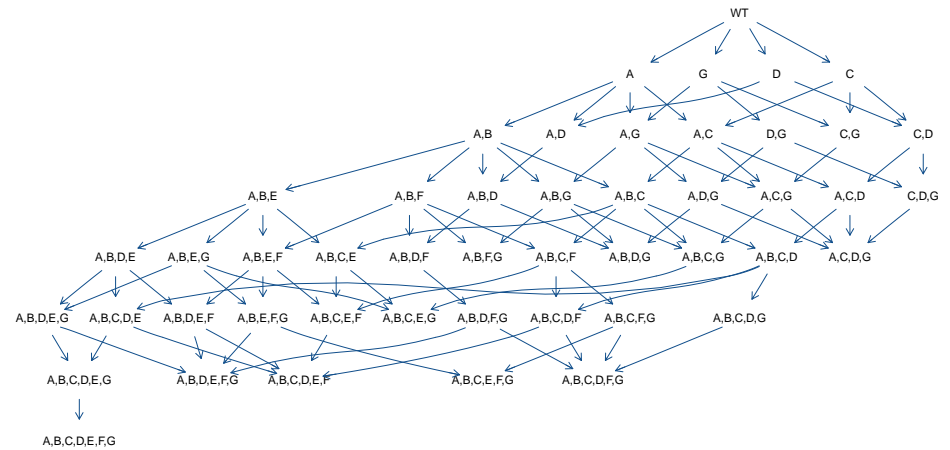

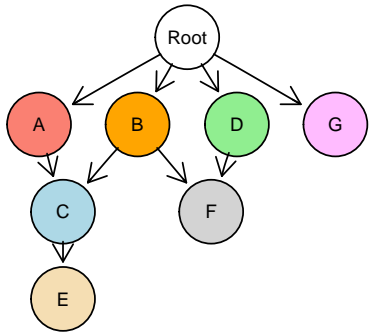

ID **ftXUauhtPgyyoHR**  
 acc genotypes **32**  
 peaks no back **5**  
 removed edges **15**  
 prop rem edges **0.227**

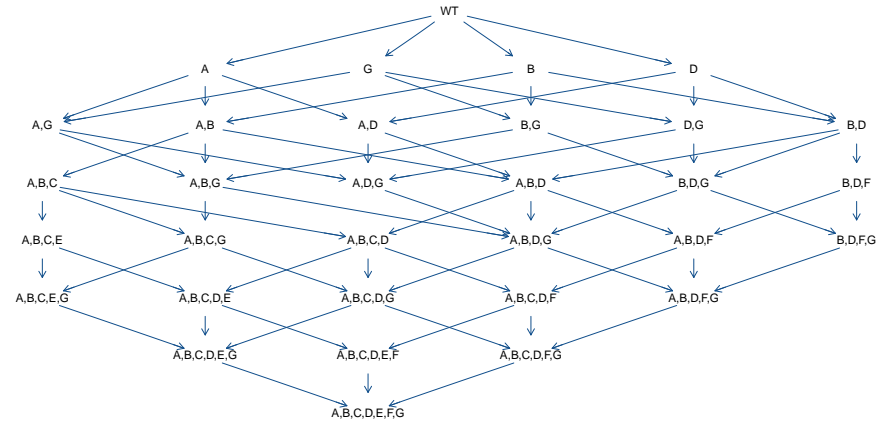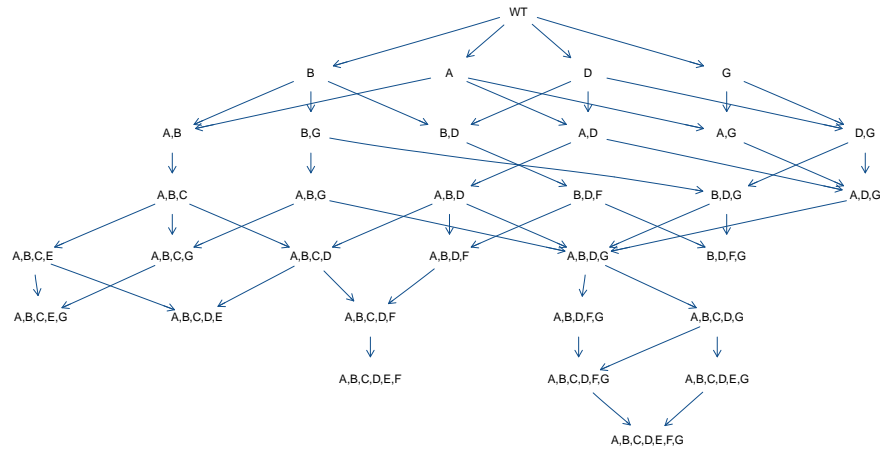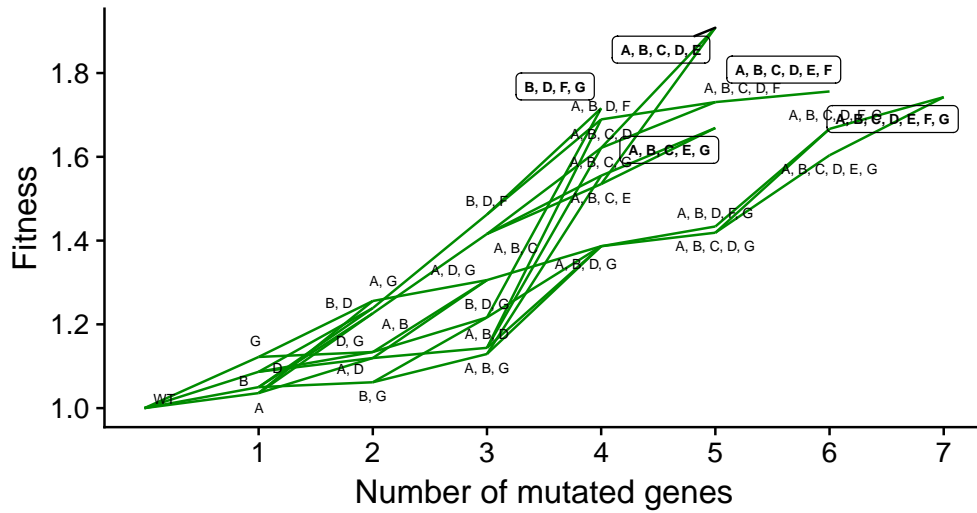



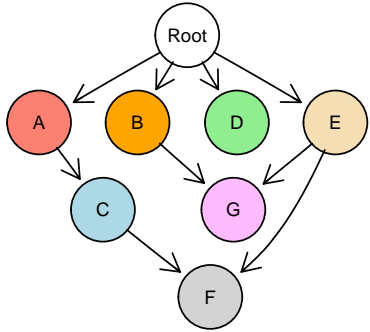

ID **fw757Yty4nJQzn3B**  
 acc genotypes **36**  
 peaks no back **5**  
 removed edges **10**  
 prop rem edges **0.128**

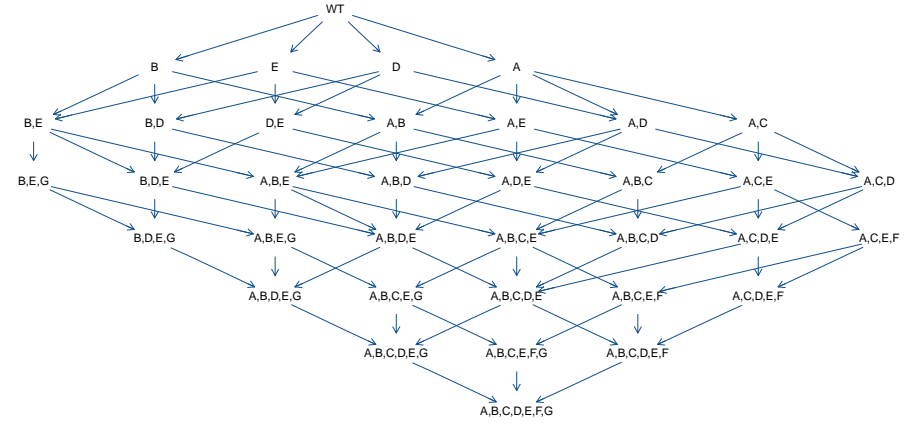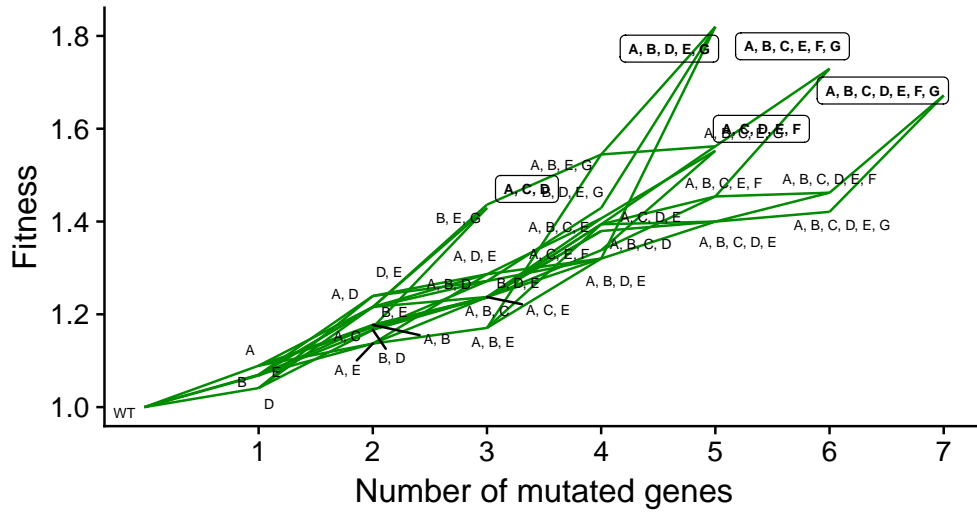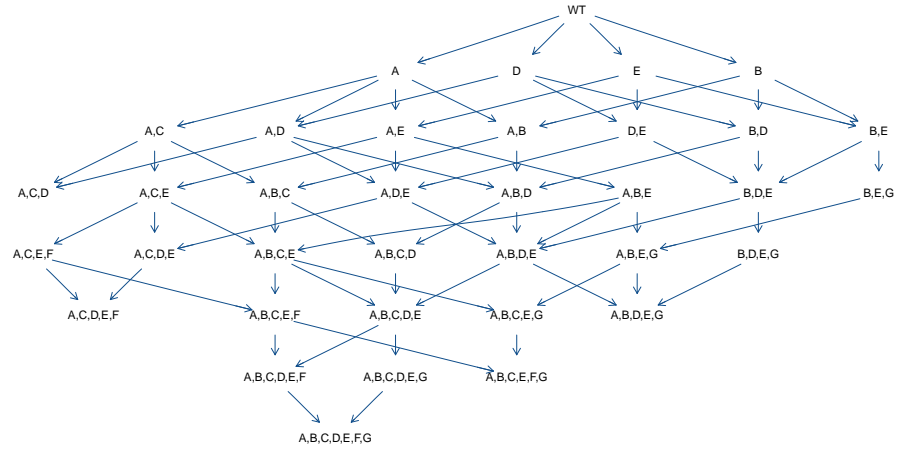

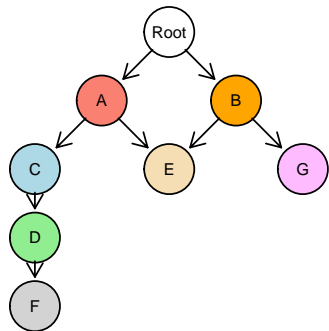

ID **g38nzkCLq72TPfvC**  
 acc genotypes **23**  
 peaks no back **5**  
 removed edges **8**  
 prop rem edges **0.2**

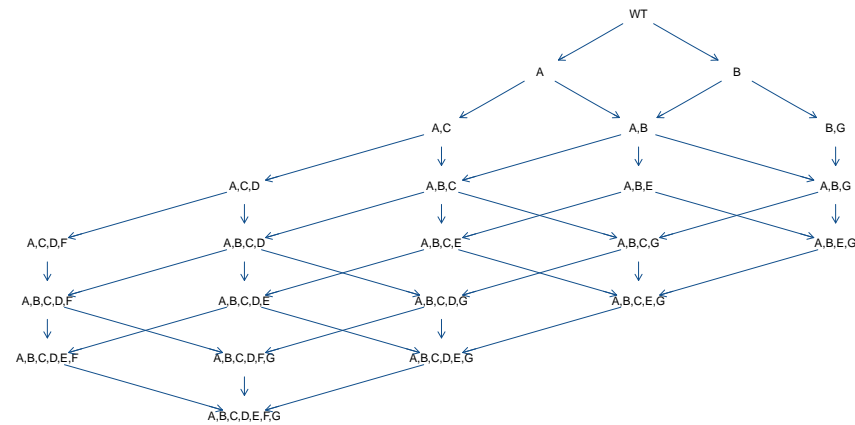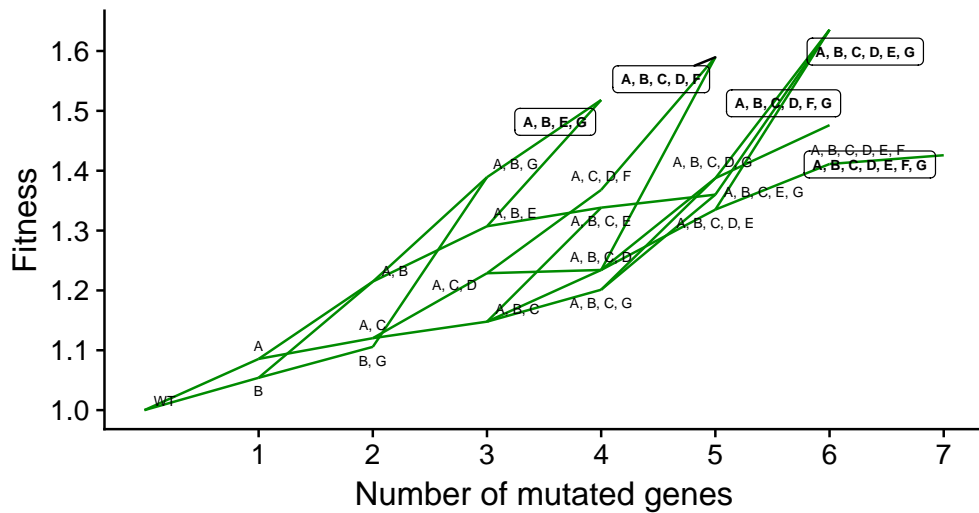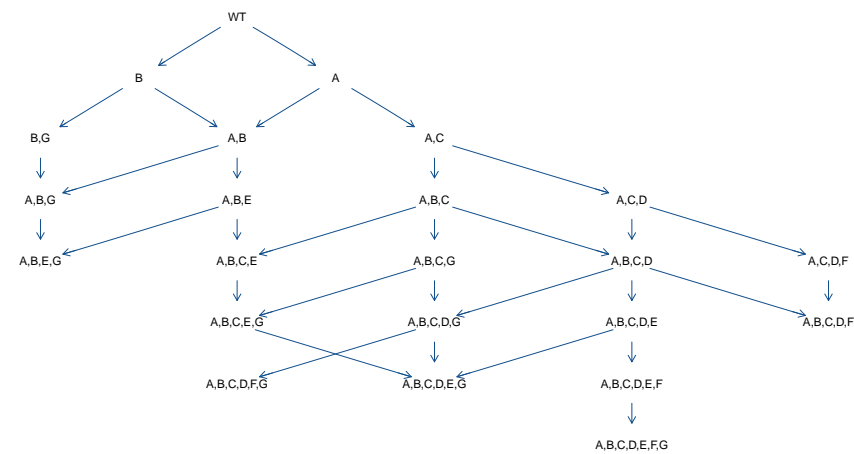



ID GedZaWDeb1029Mf88  
 acc genotypes 11  
 peaks no back 2  
 removed edges 2  
 prop rem edges 0.154

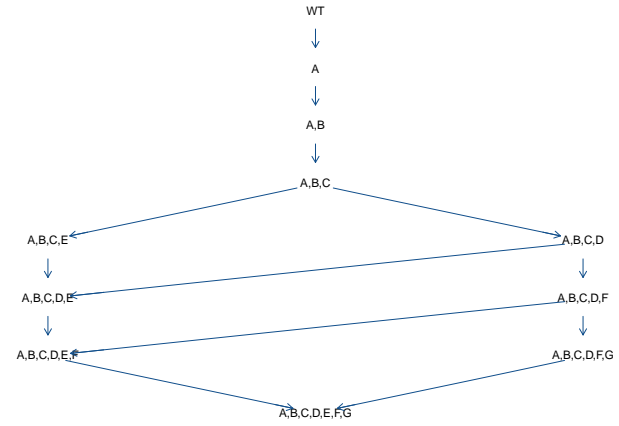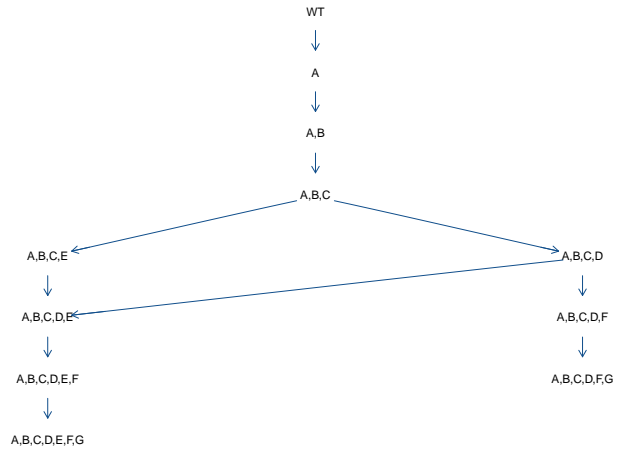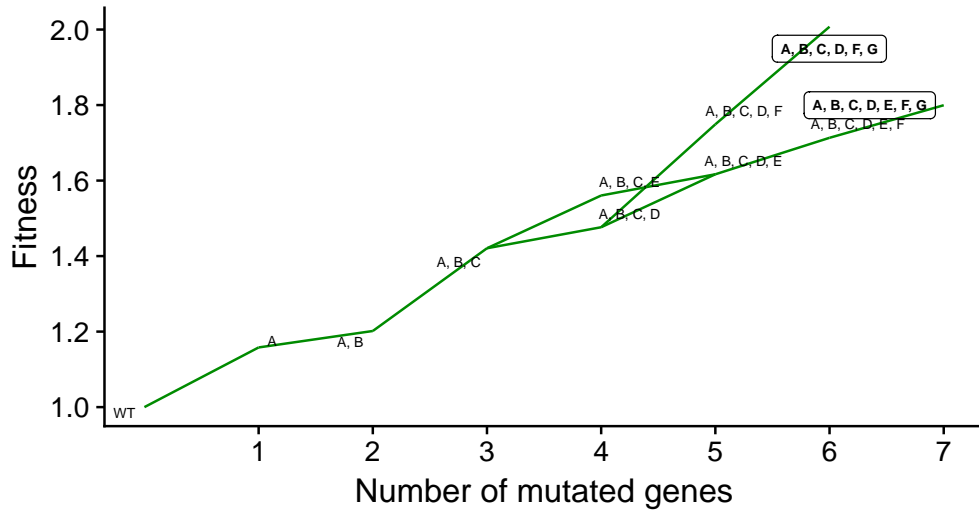

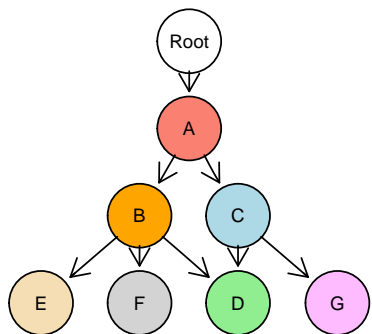

ID [gfkgoLnyr7gjNQkC](#)  
 acc genotypes 24  
 peaks no back 5  
 removed edges 10  
 prop rem edges 0.217

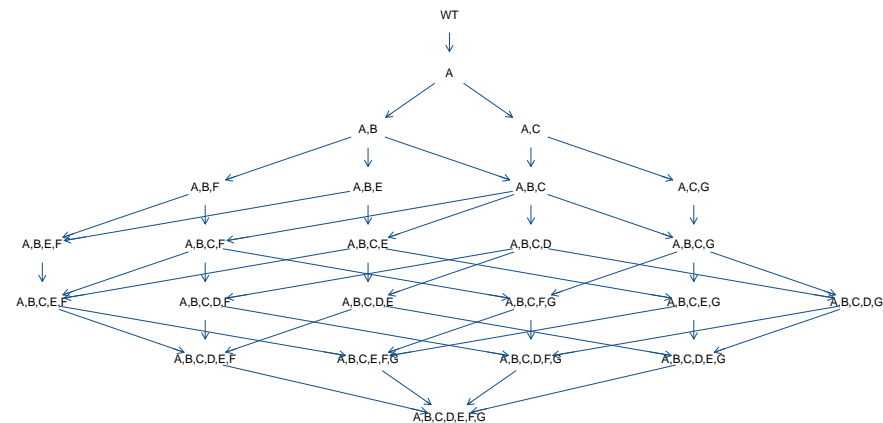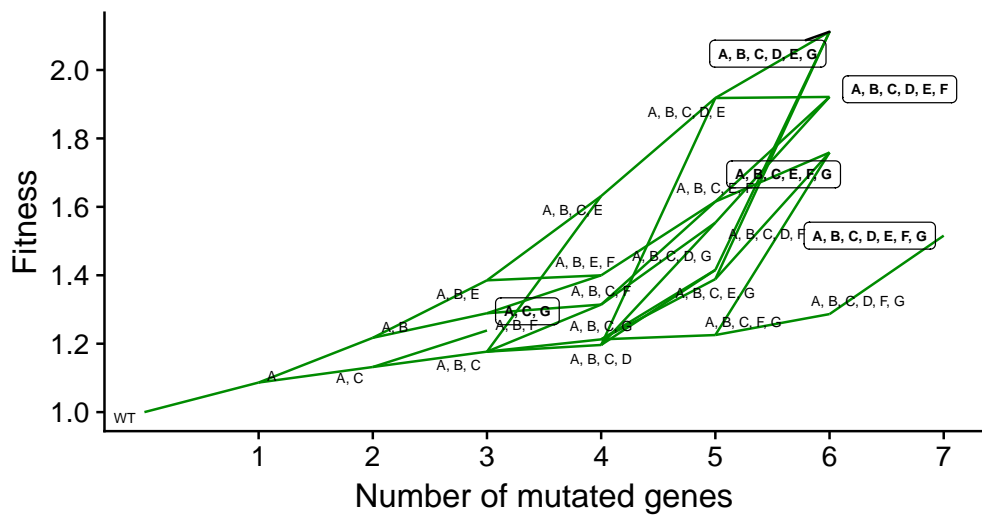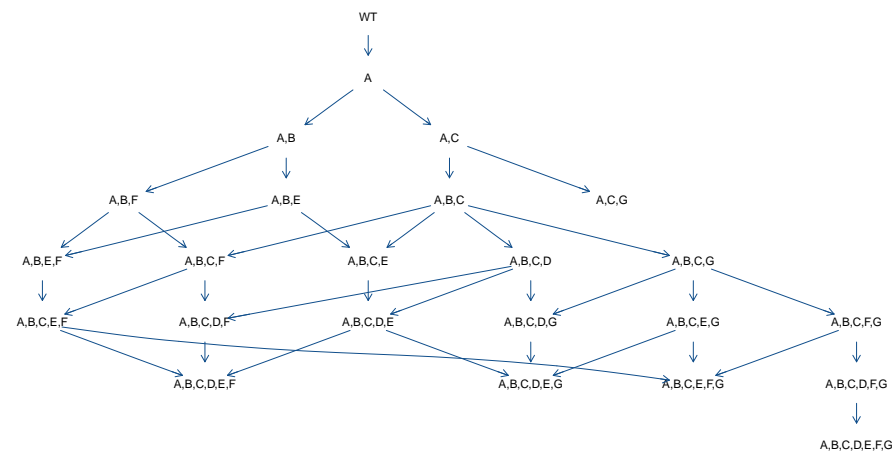

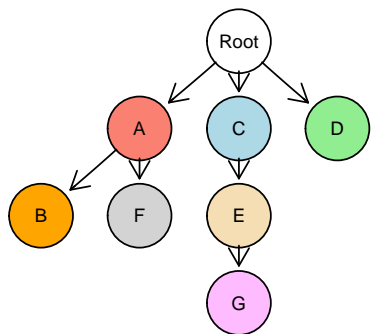

ID **gKfKrRLHCELf6w8t**  
 acc genotypes **40**  
 peaks no back **2**  
 removed edges **8**  
 prop rem edges **0.089**

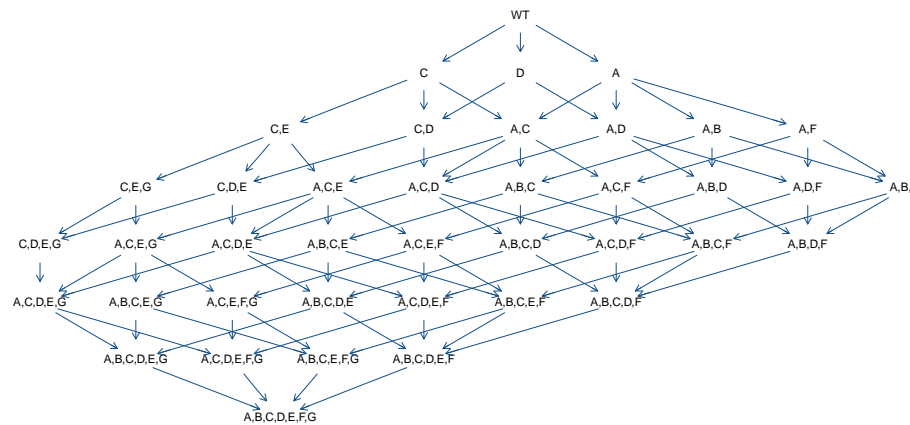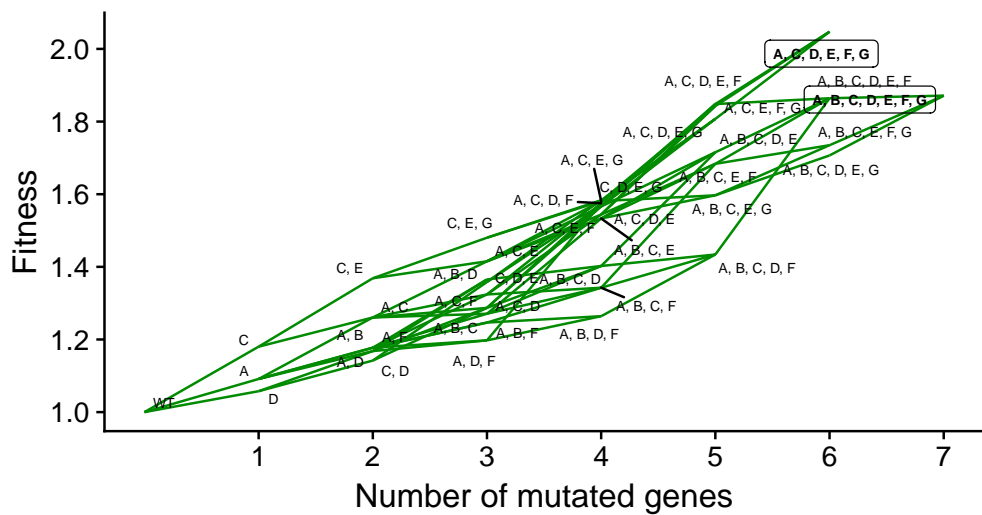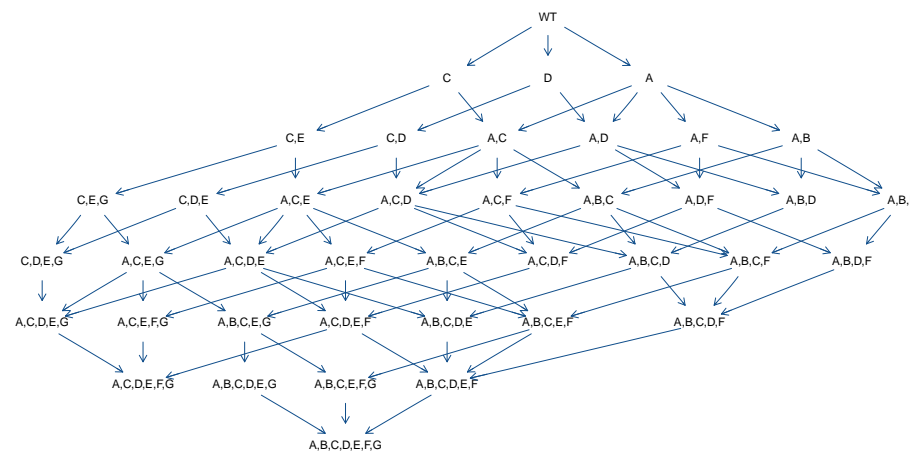

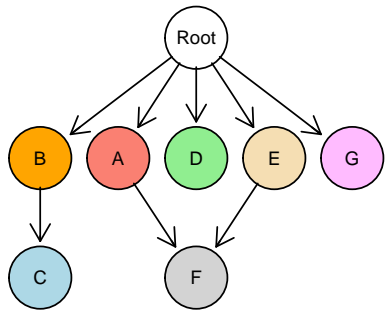

ID GM3TL5lyxTmLPLFB  
 acc genotypes 60  
 peaks no back 9  
 removed edges 25  
 prop rem edges 0.156

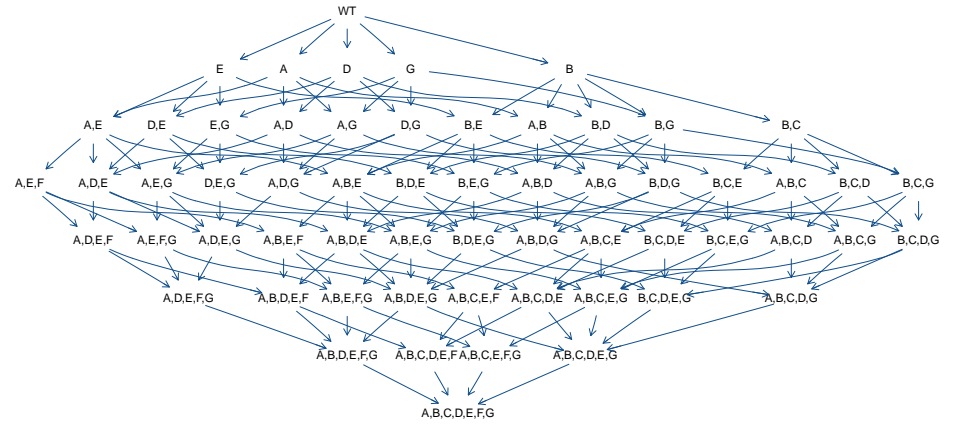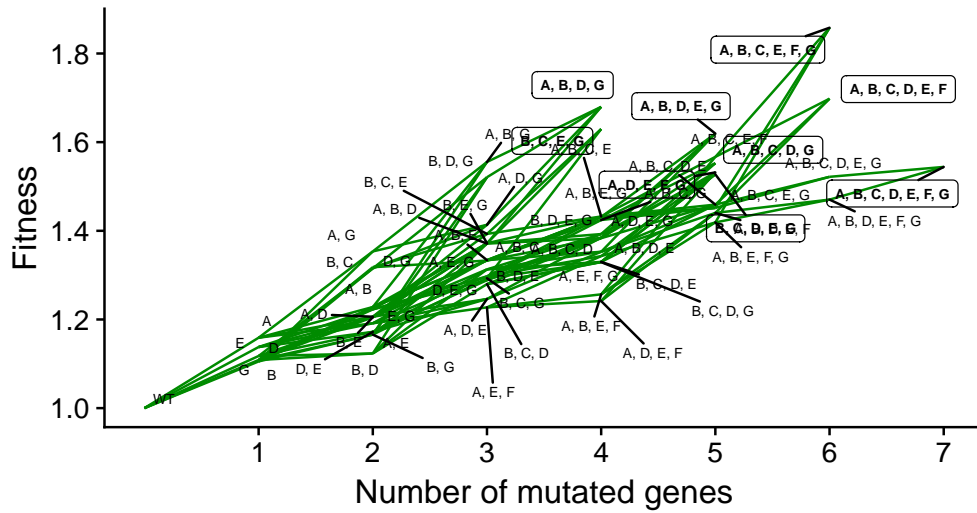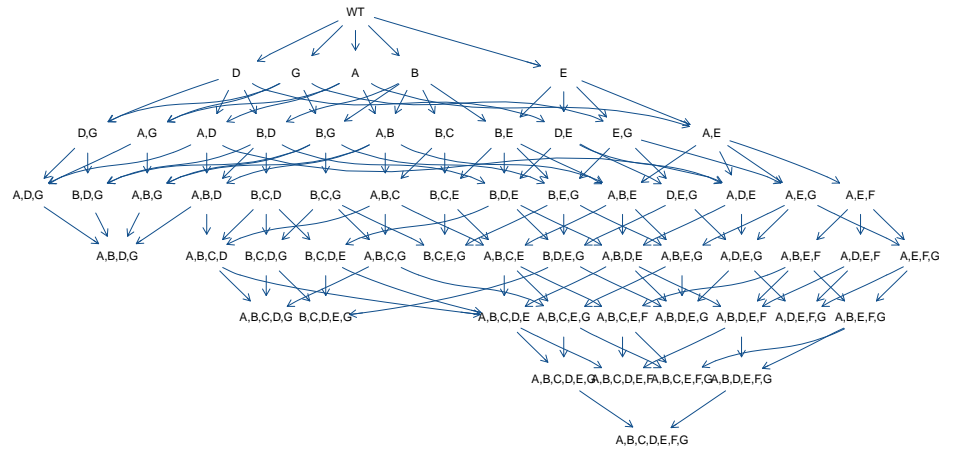

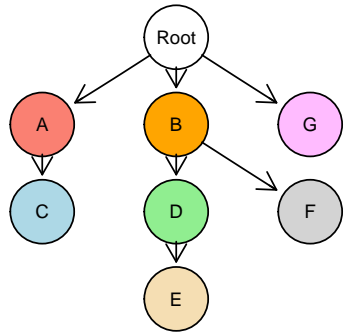

ID [gOGMou3PVNxUeDQ5](#)  
 acc genotypes 42  
 peaks no back 6  
 removed edges 18  
 prop rem edges 0.186

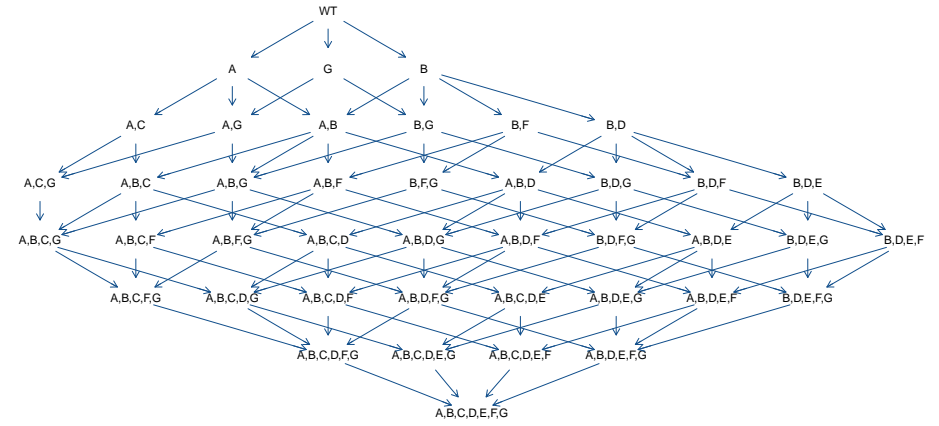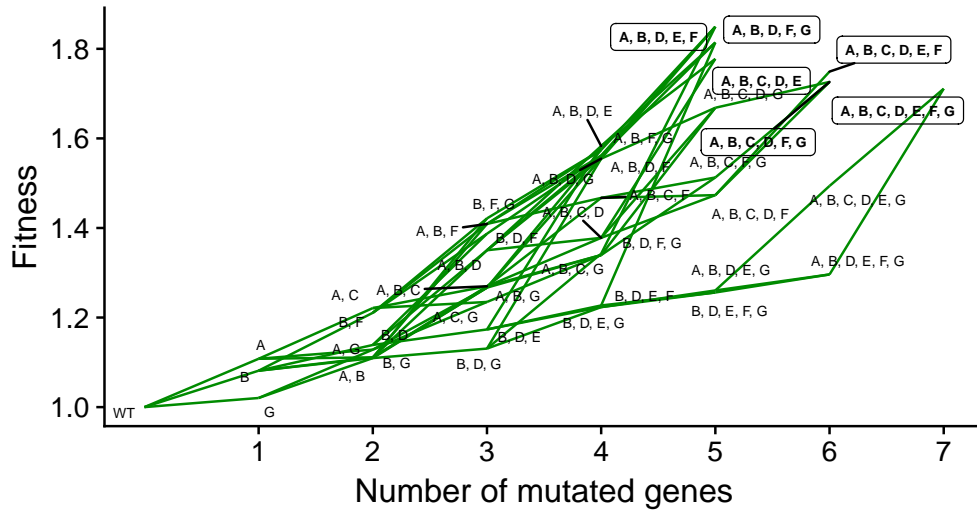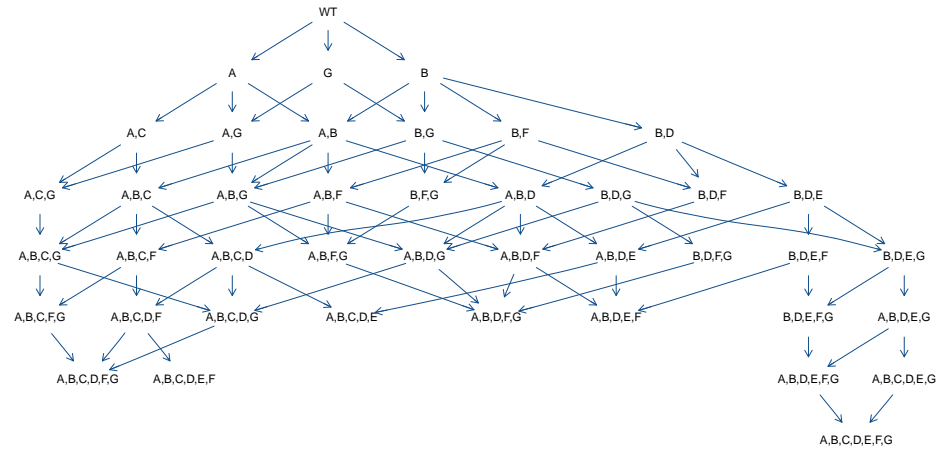

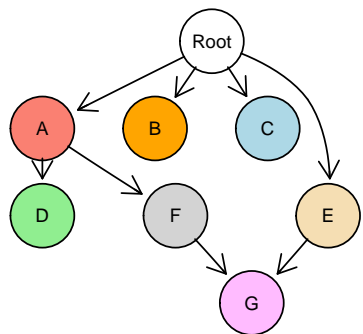

ID **GwFwG10TqvAnPNr82**  
 acc genotypes **48**  
 peaks no back **7**  
 removed edges **33**  
 prop rem edges **0.275**

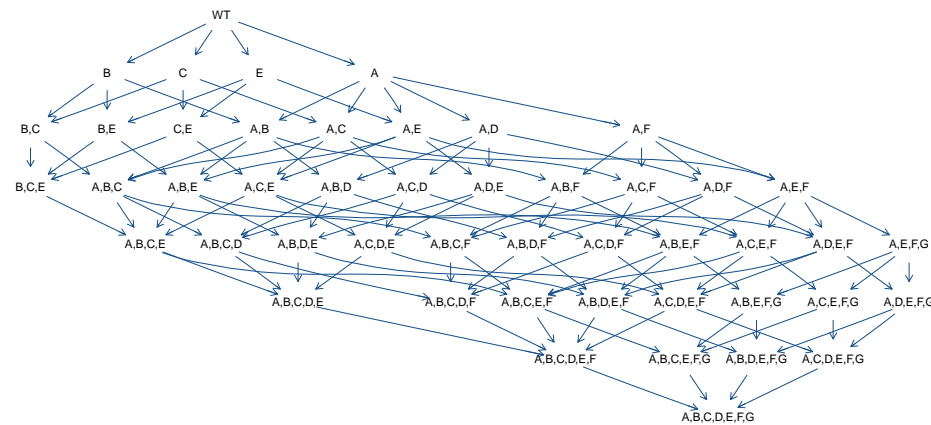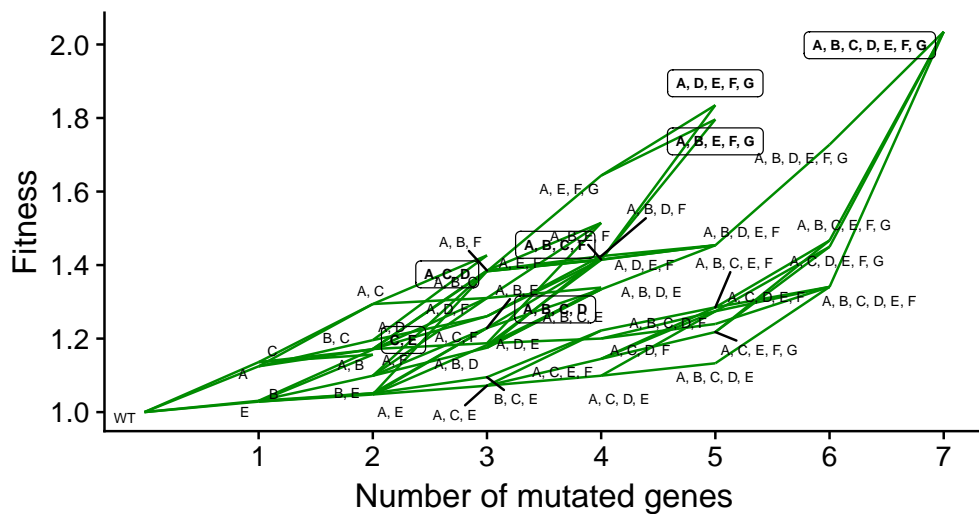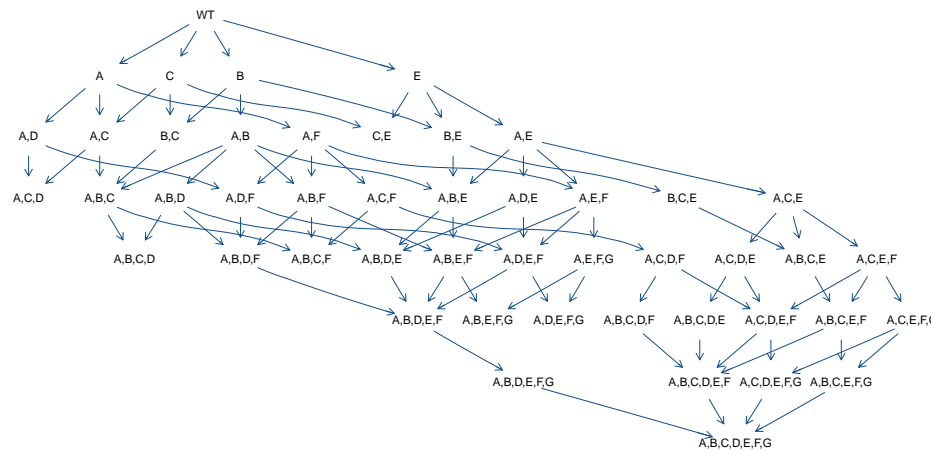



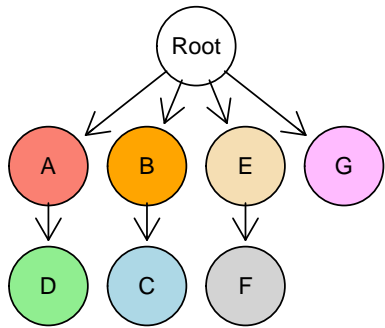

ID **haC6AnZXOHVkoVUX**  
*acc genotypes* **54**  
*peaks no back* **6**  
*removed edges* **21**  
*prop rem edges* **0.156**

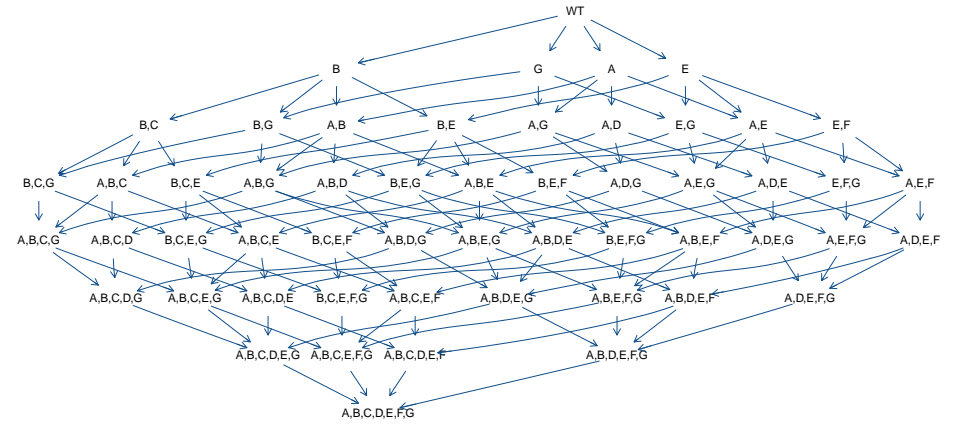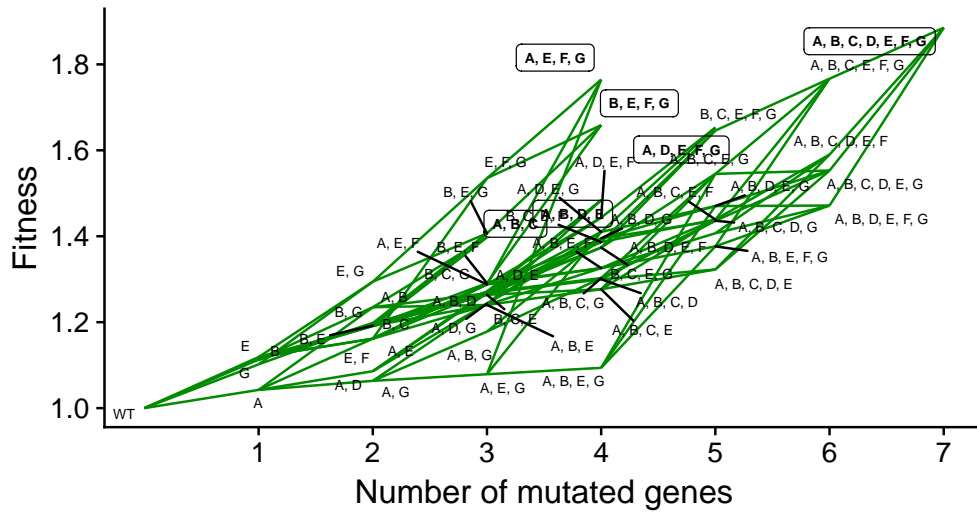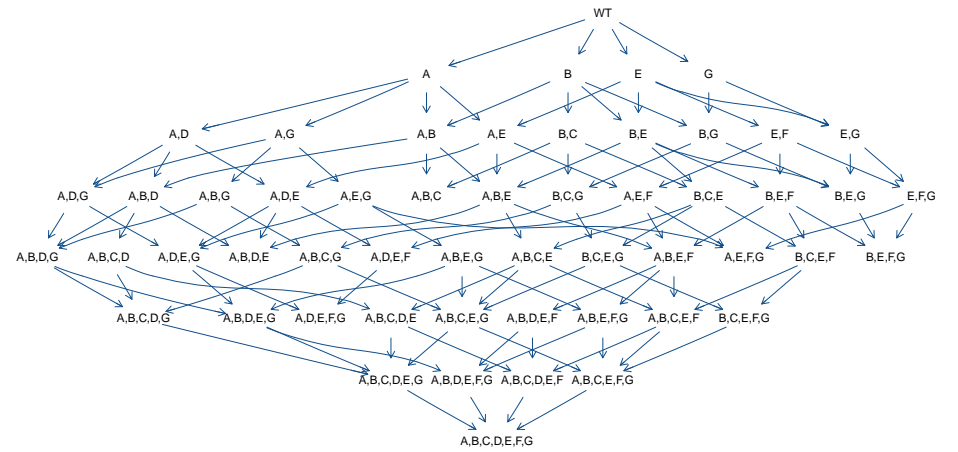

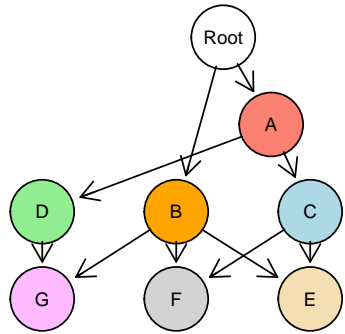

ID Hc4dDscce1OxyhxX  
 acc genotypes 21  
 peaks no back 5  
 removed edges 7  
 prop rem edges 0.194

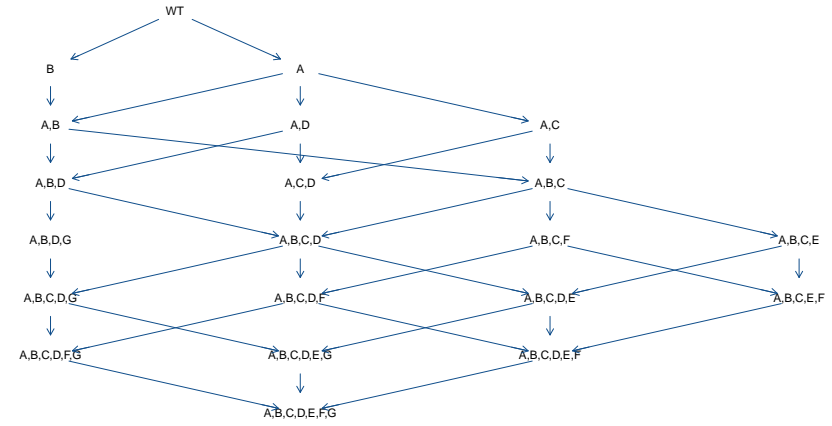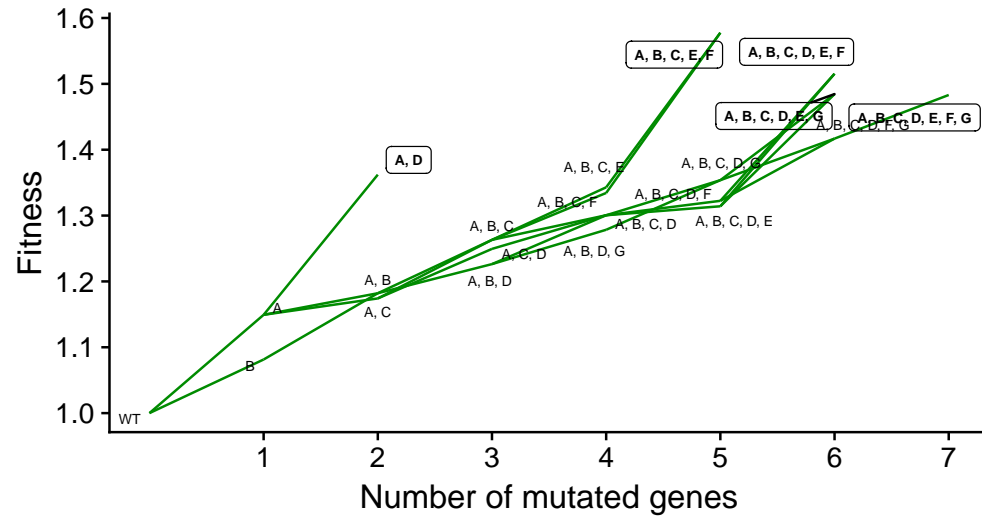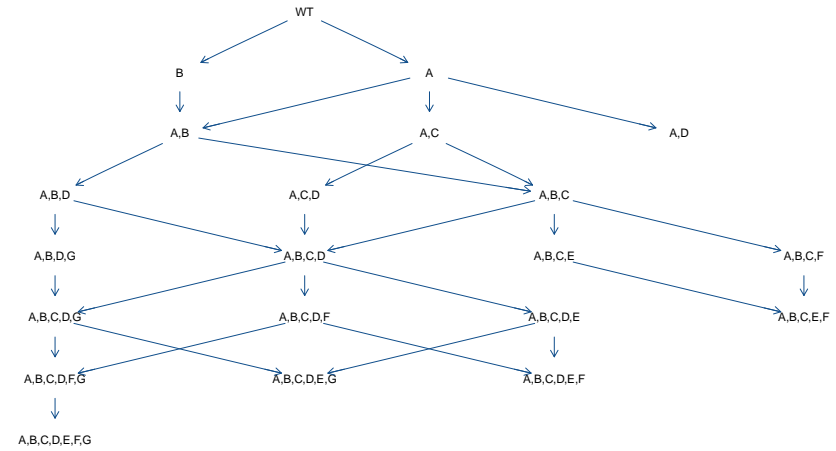

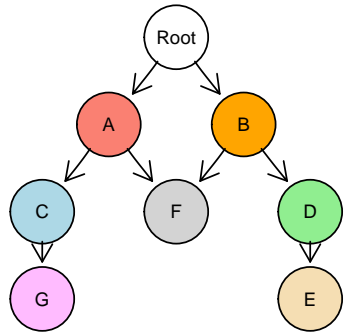

ID HFe7qJ1sPtvaUtG  
 acc genotypes 25  
 peaks no back 4  
 removed edges 5  
 prop rem edges 0.111

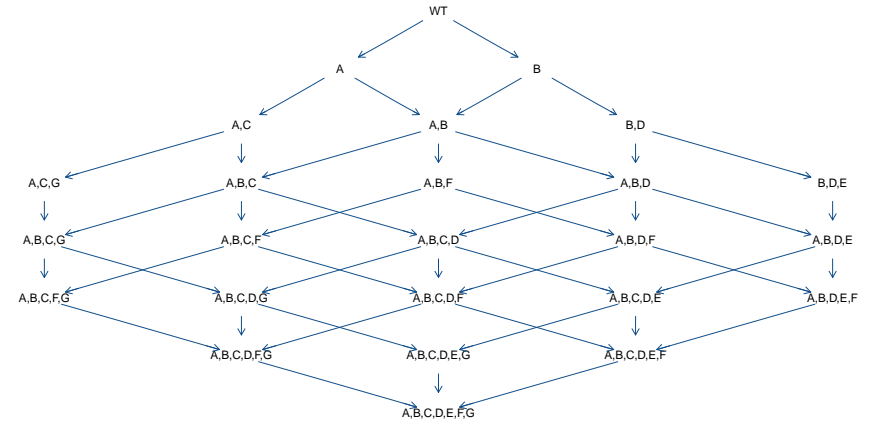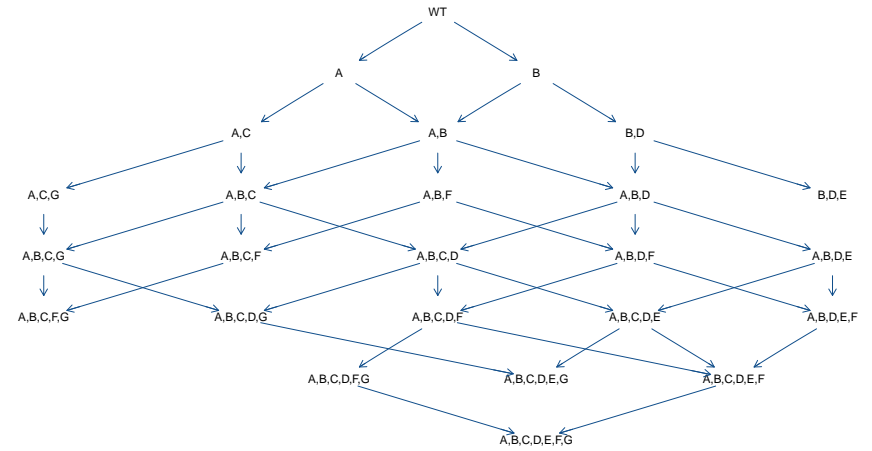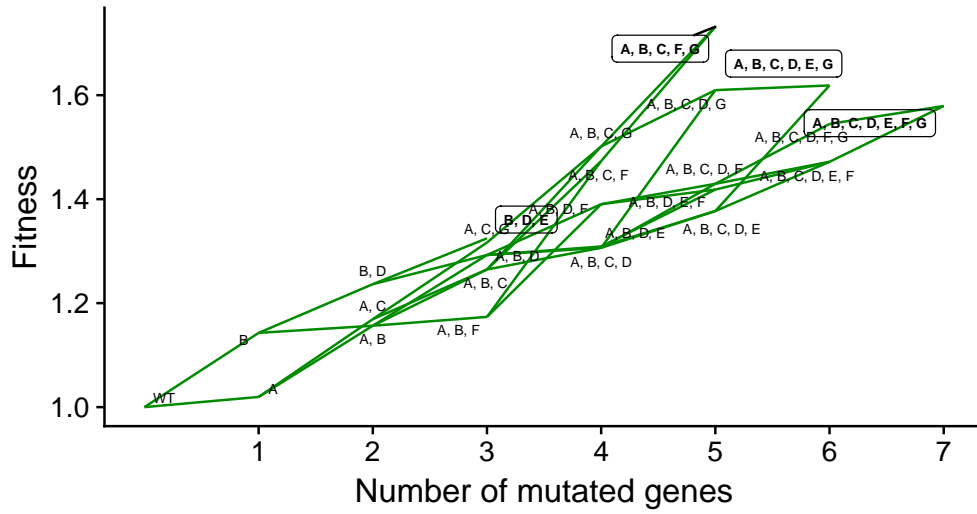

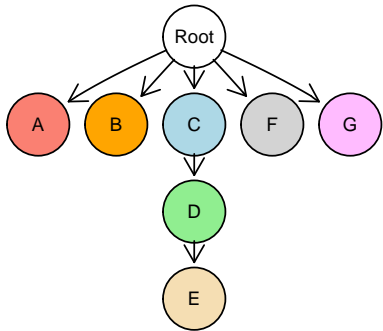

ID **hloXRm4d7aXmN4**  
 acc genotypes **64**  
 peaks no back **2**  
 removed edges **22**  
 prop rem edges **0.125**

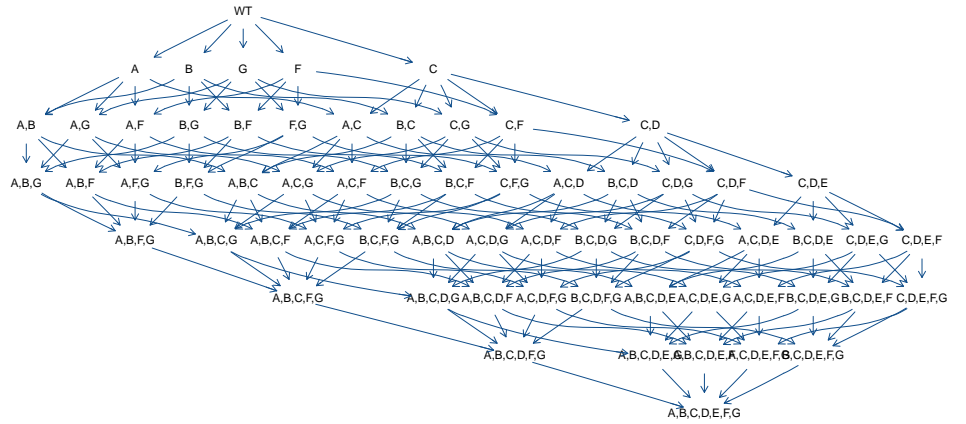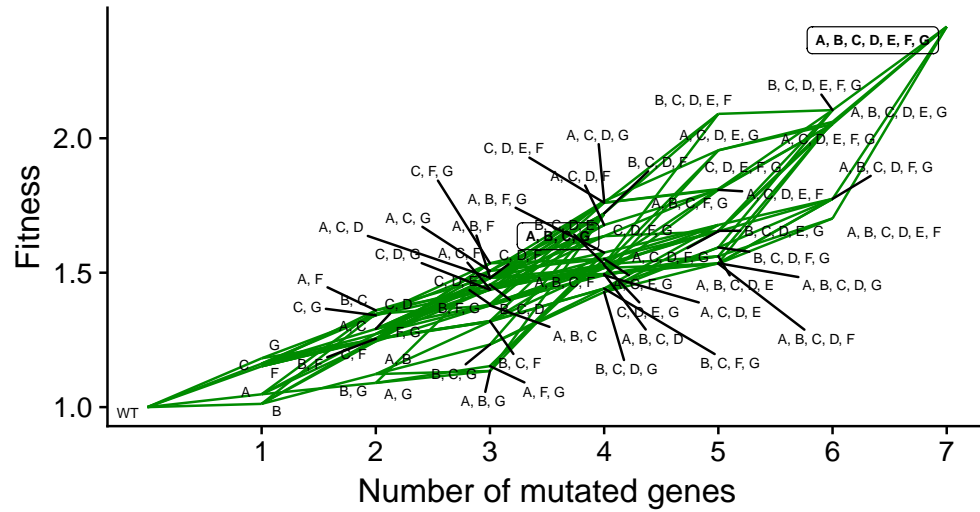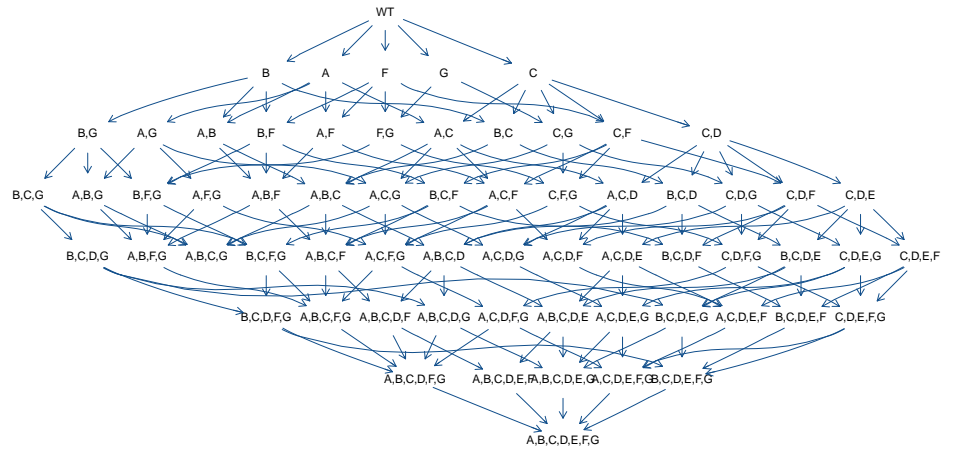

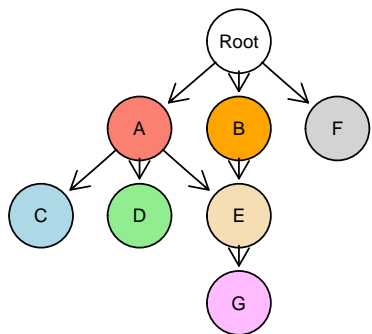

ID HizeMNX910W6f2YLA  
 acc genotypes 36  
 peaks no back 5  
 removed edges 12  
 prop rem edges 0.15

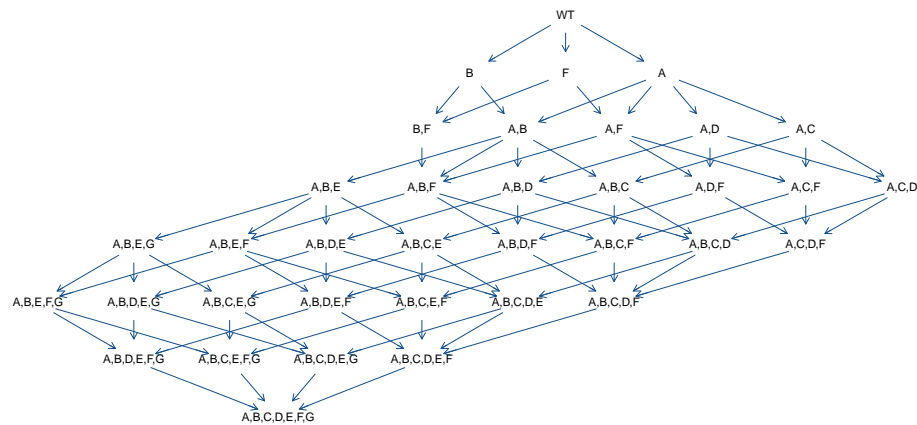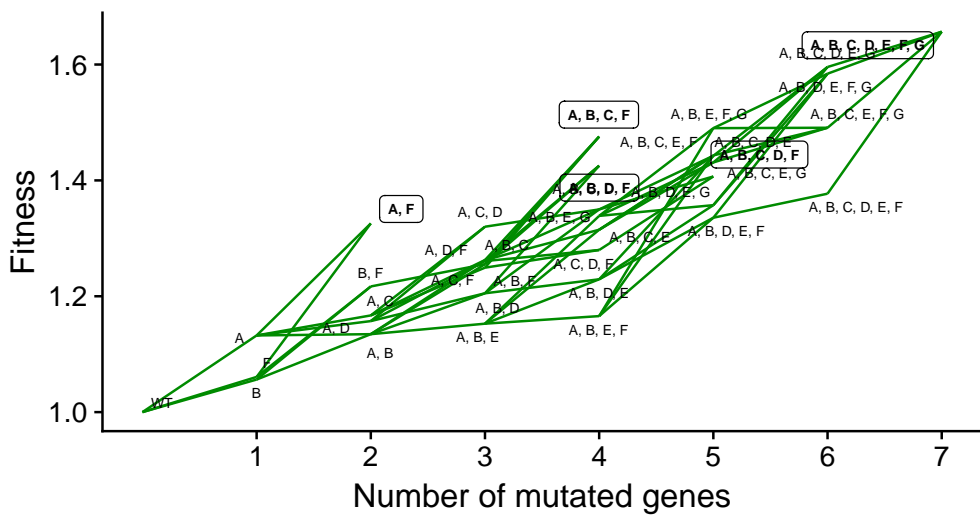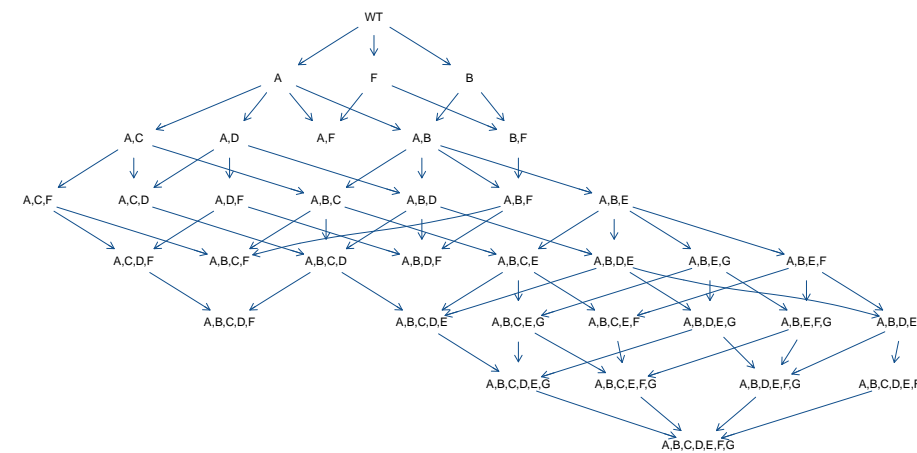

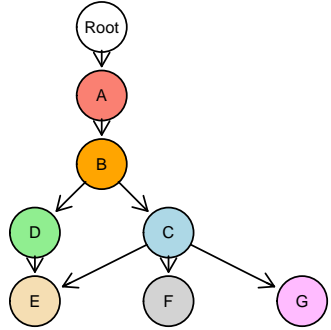

ID **hw8kQ4g44p4XAkDa**  
 acc genotypes **16**  
 peaks no back **2**  
 removed edges **3**  
 prop rem edges **0.12**

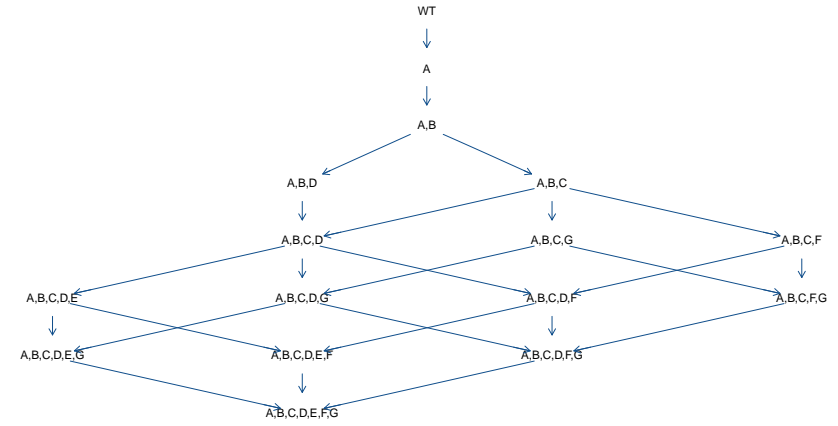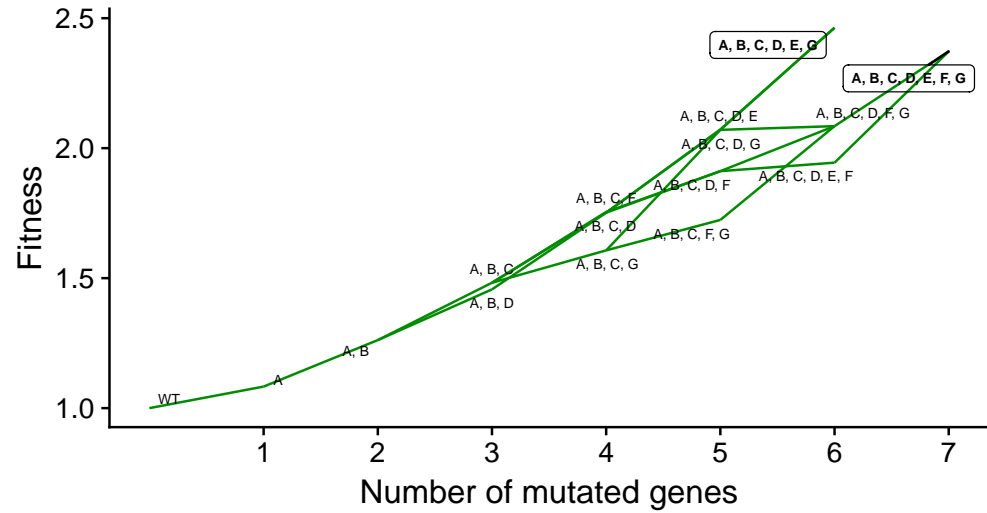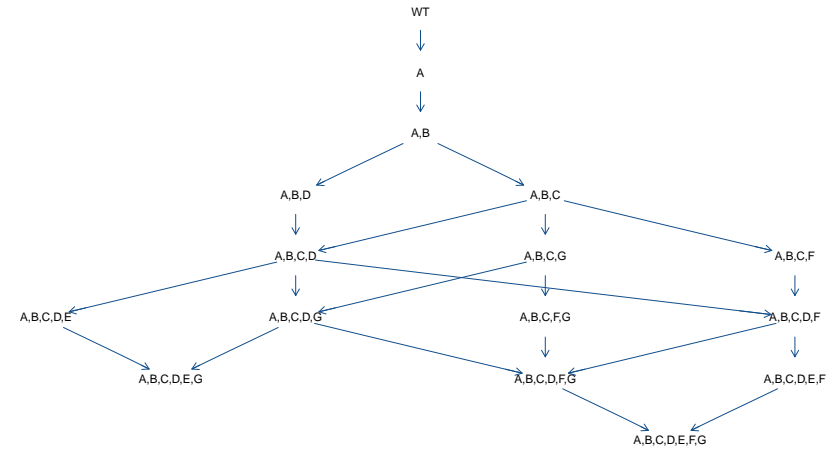



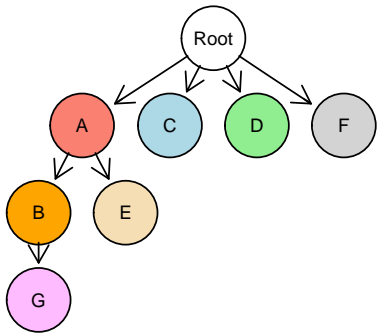

ID **Id85CzgL2g6AV3510**  
 acc genotypes **56**  
 peaks no back **9**  
 removed edges **38**  
 prop rem edges **0.257**

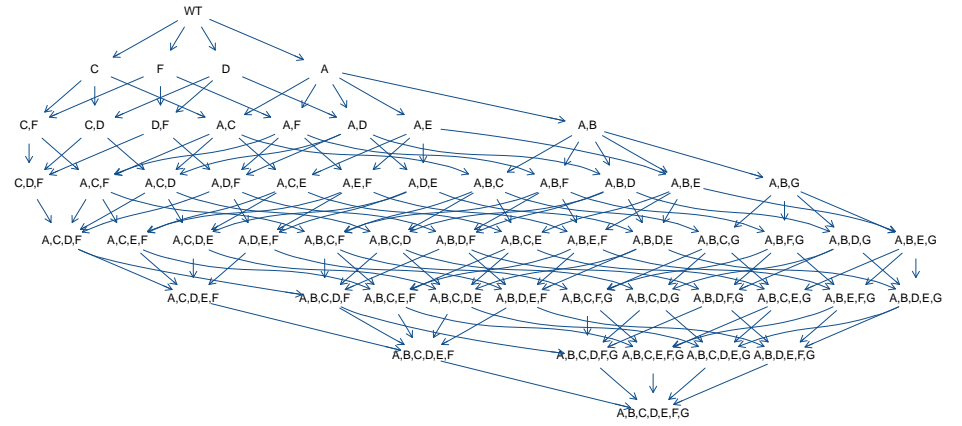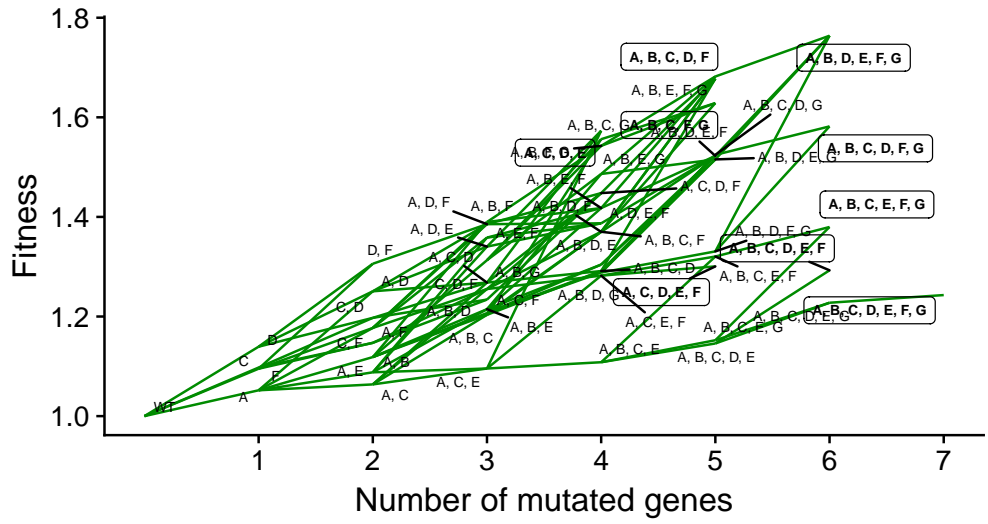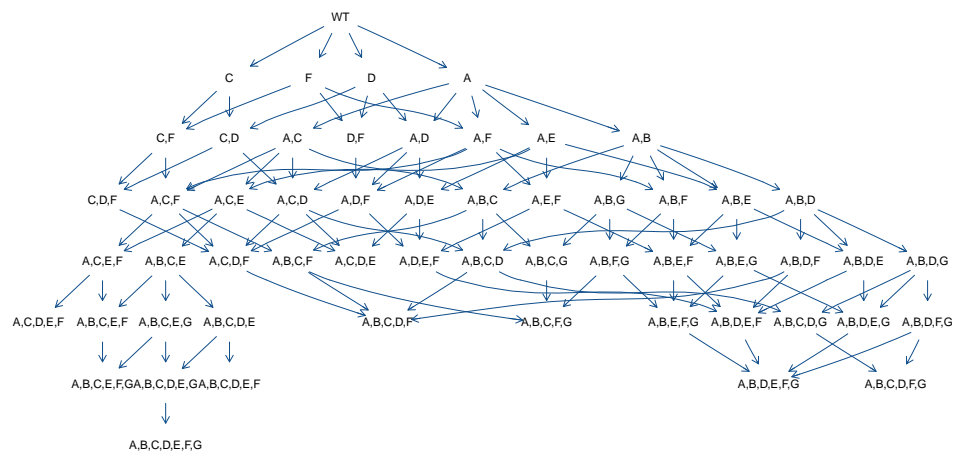



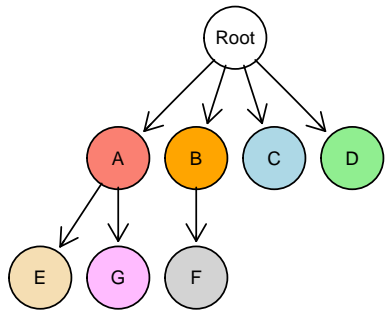

ID ILWtHZyJ9o3F1Qgp  
 acc genotypes 60  
 peaks no back 3  
 removed edges 20  
 prop rem edges 0.125

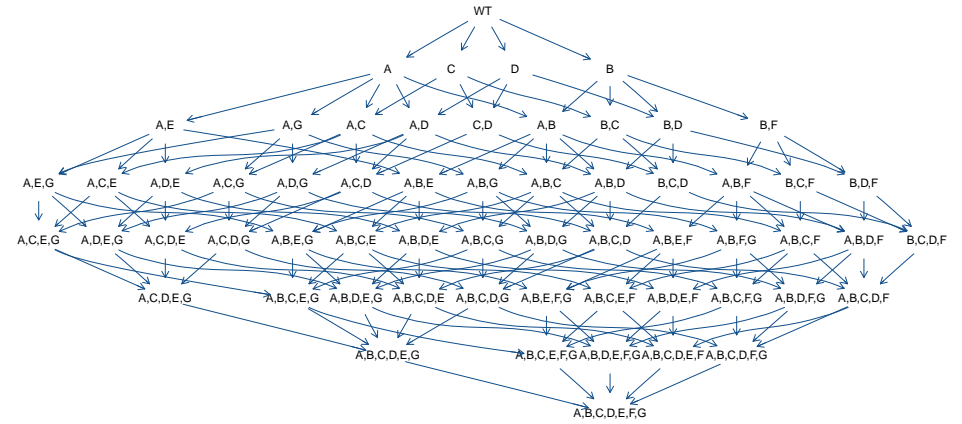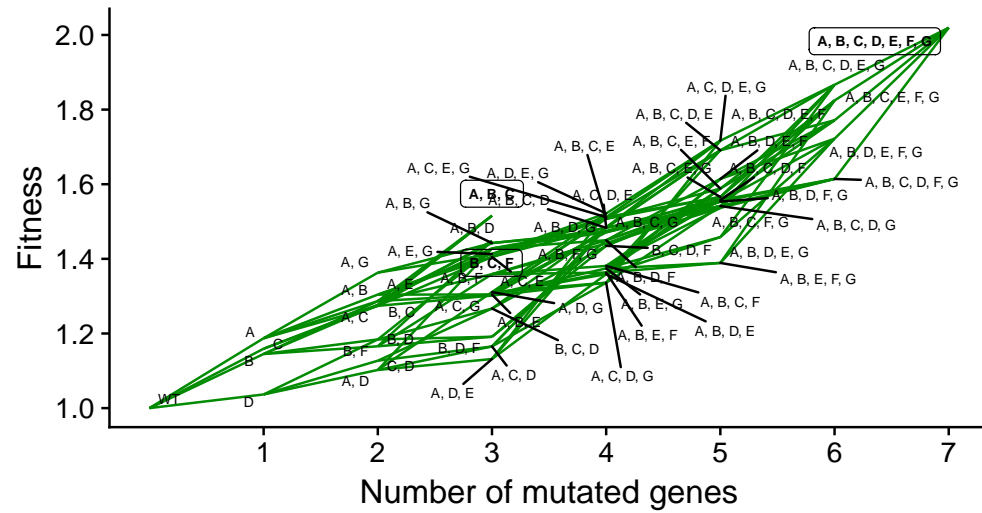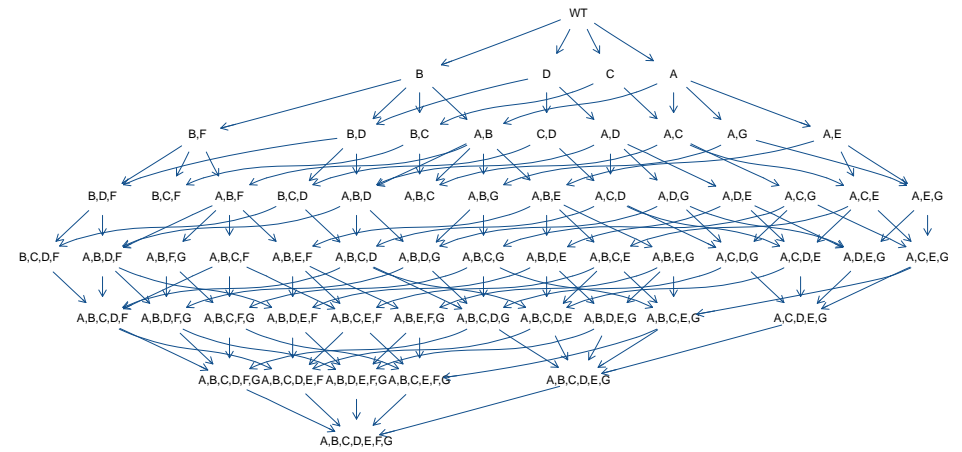

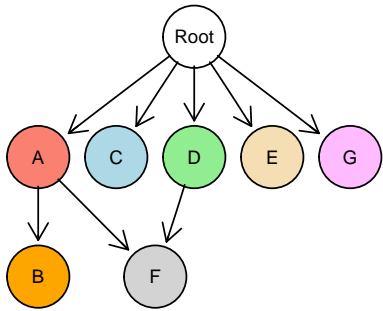

ID JABP9YQJqeNRAKVt  
 acc genotypes 64  
 peaks no back 8  
 removed edges 35  
 prop rem edges 0.199

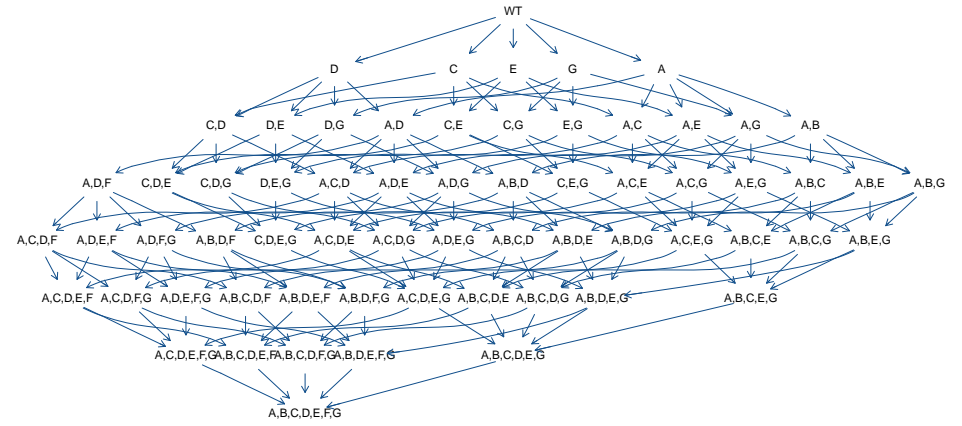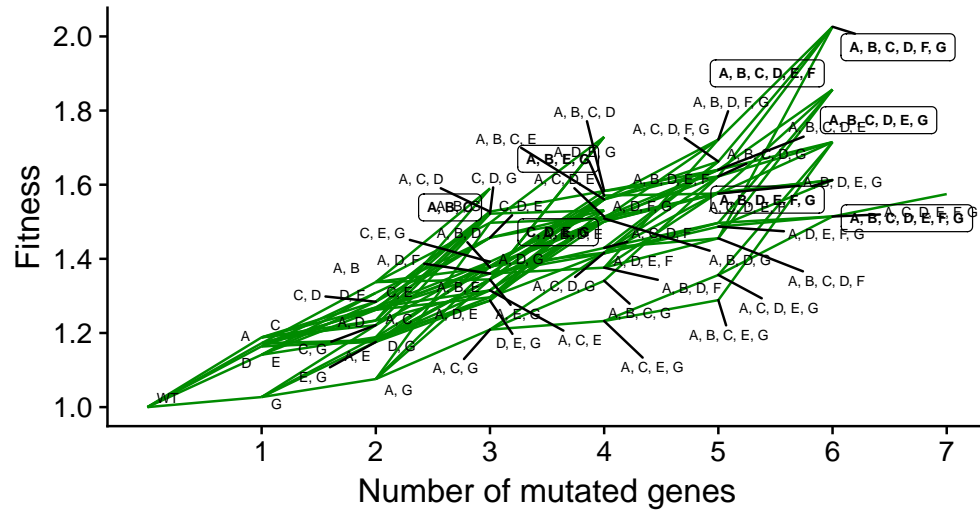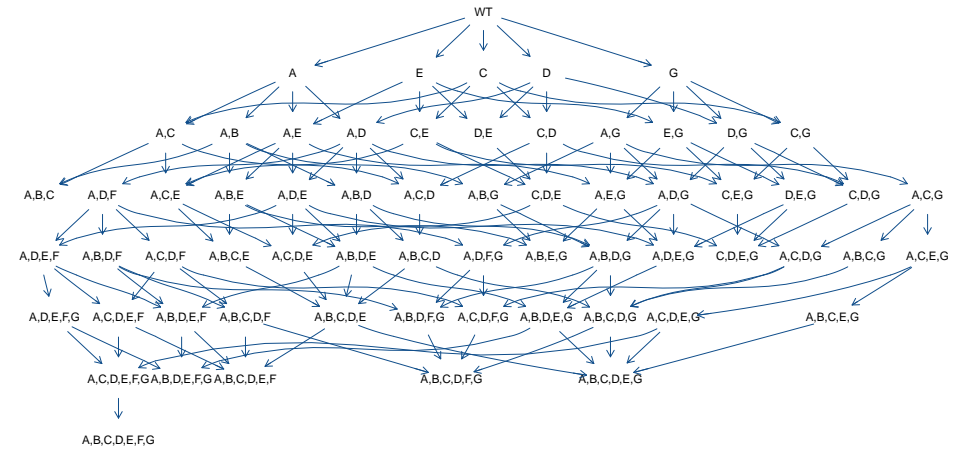

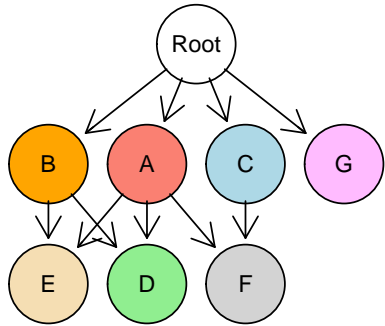

ID **jFHaUyfw10mPN2R1P**  
 acc genotypes **38**  
 peaks no back **4**  
 removed edges **15**  
 prop rem edges **0.176**

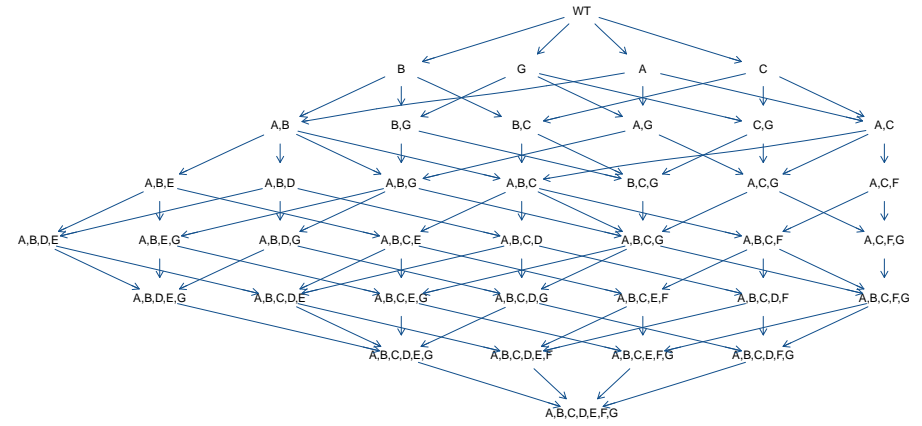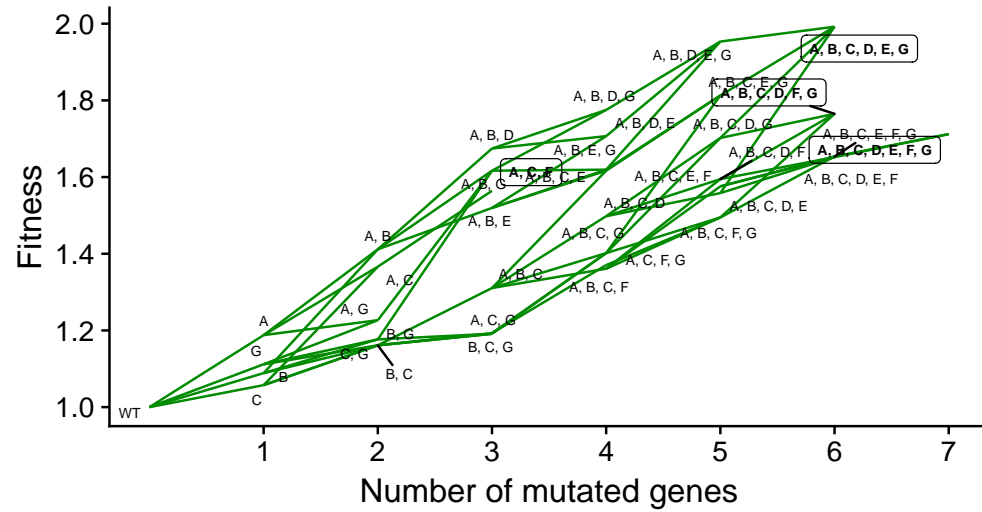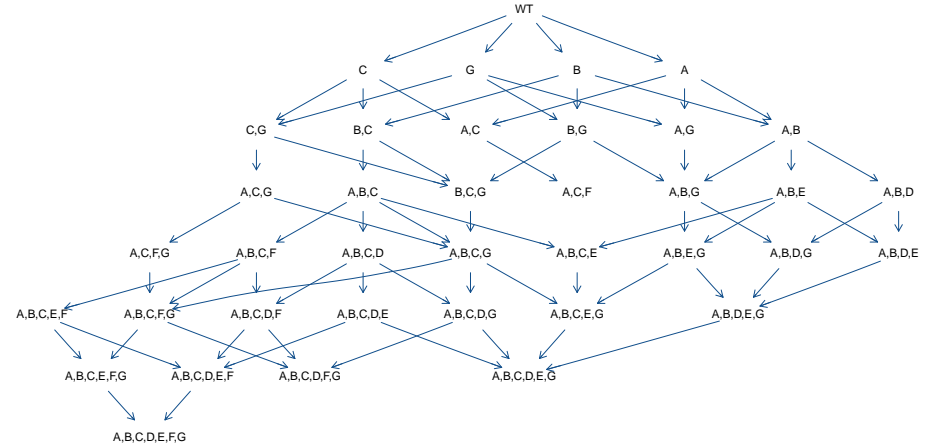

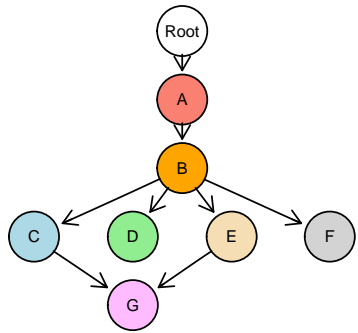

ID [jj397ue810e35pKQe](#)  
 acc genotypes 22  
 peaks no back 3  
 removed edges 5  
 prop rem edges 0.119

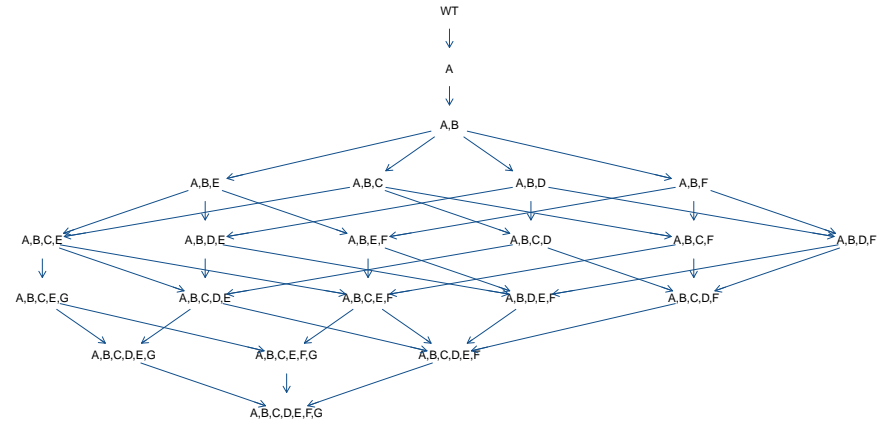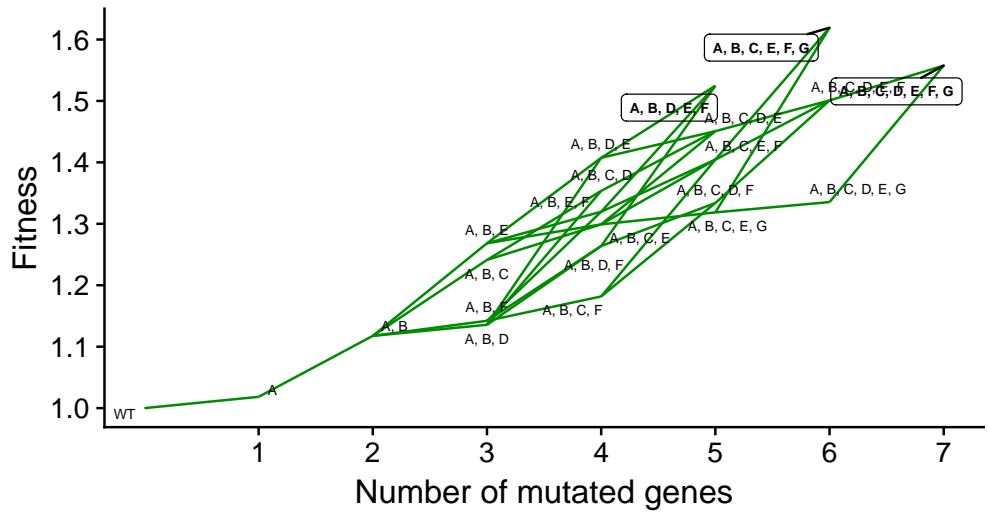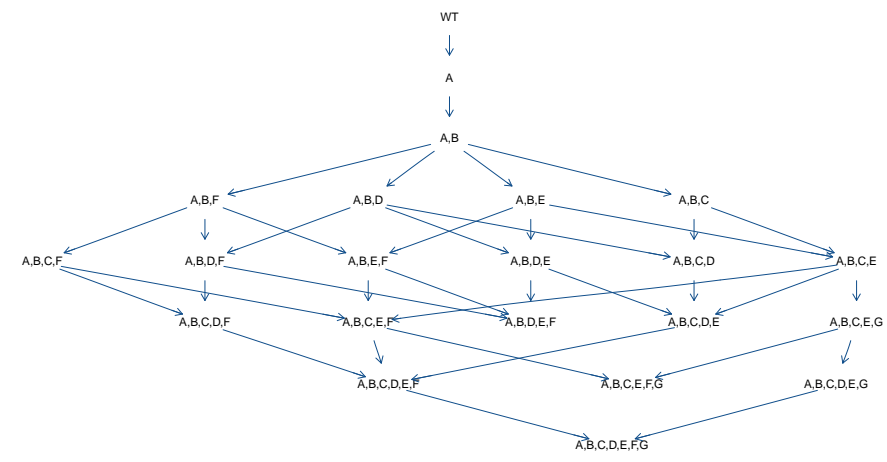

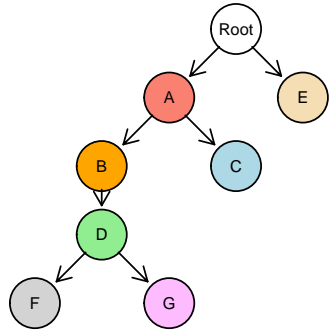

ID [jle1t2551110i164X](#)  
 acc genotypes 26  
 peaks no back 3  
 removed edges 4  
 prop rem edges 0.078

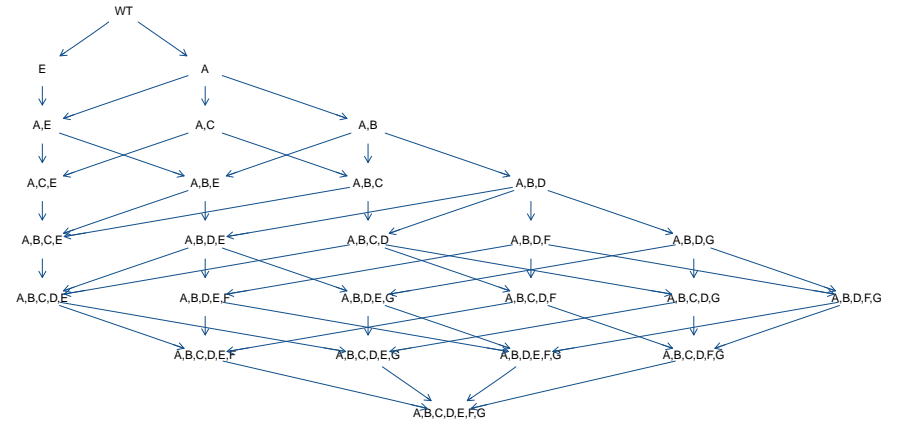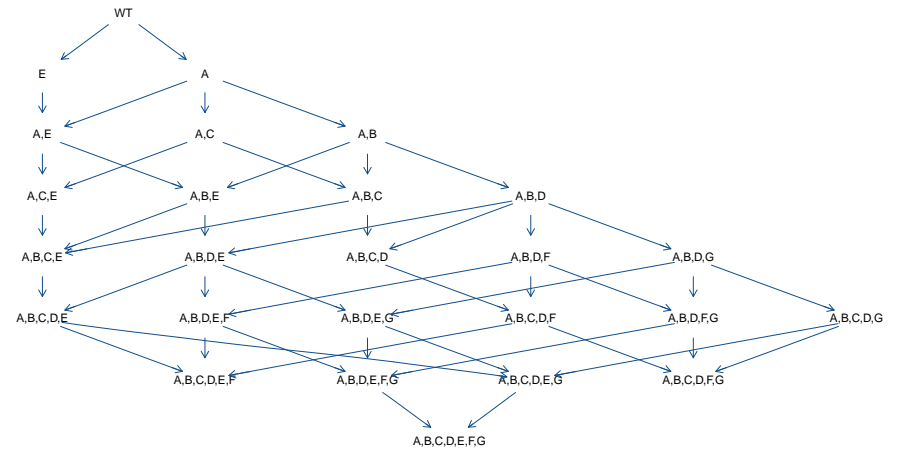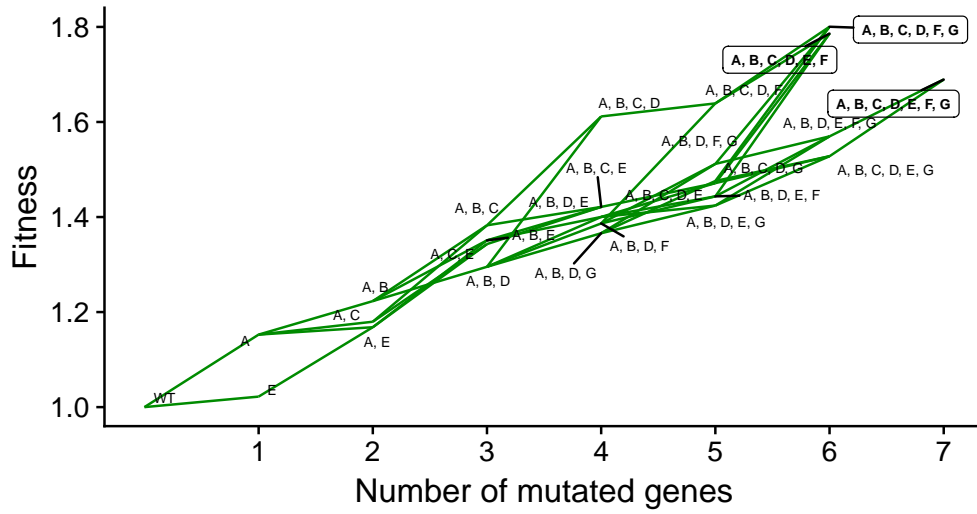

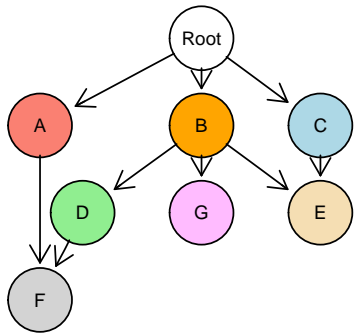

ID jXkcll8ifcrBbL2U  
 acc genotypes 34  
 peaks no back 2  
 removed edges 4  
 prop rem edges 0.055

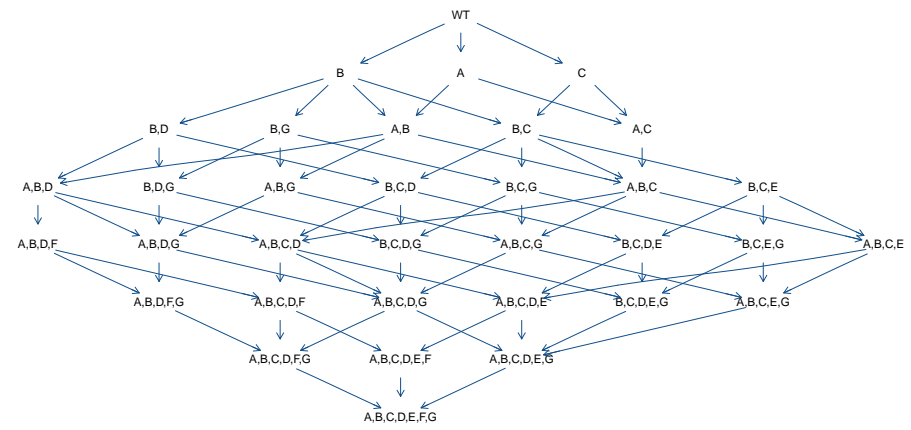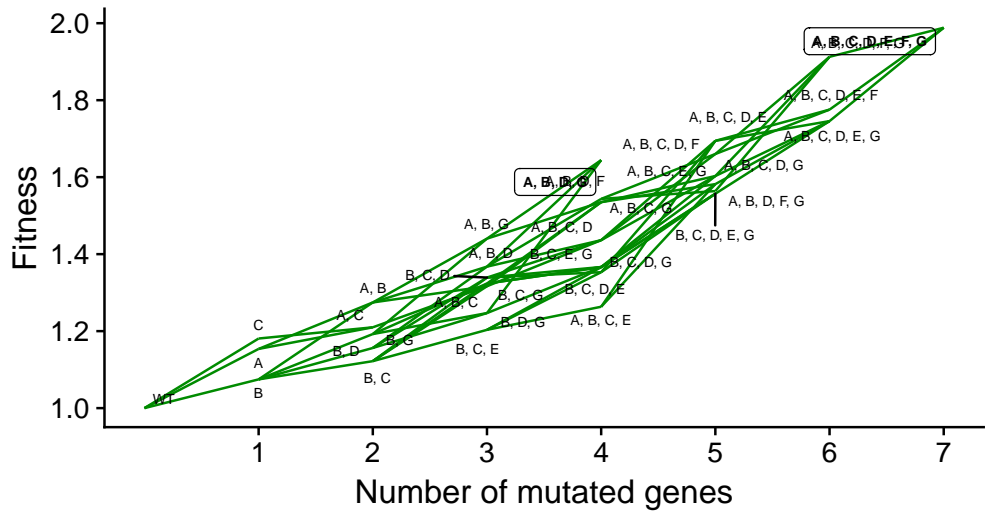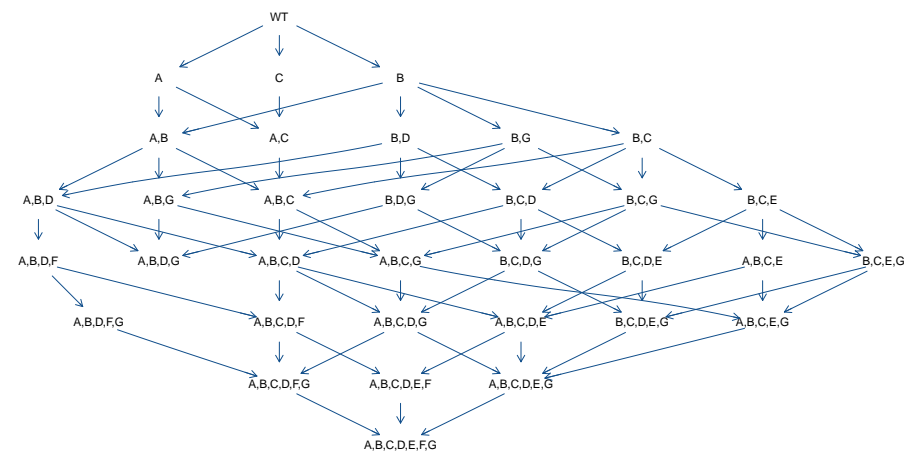

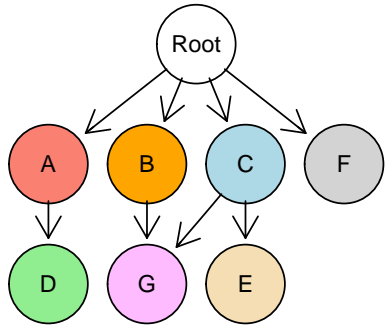

ID **JXRG1xH8vZXQkcqA**  
 acc genotypes **48**  
 peaks no back **11**  
 removed edges **27**  
 prop rem edges **0.233**

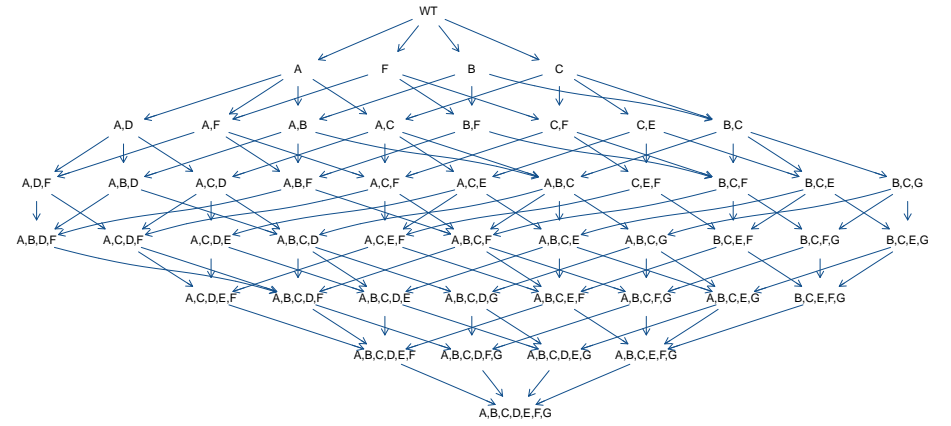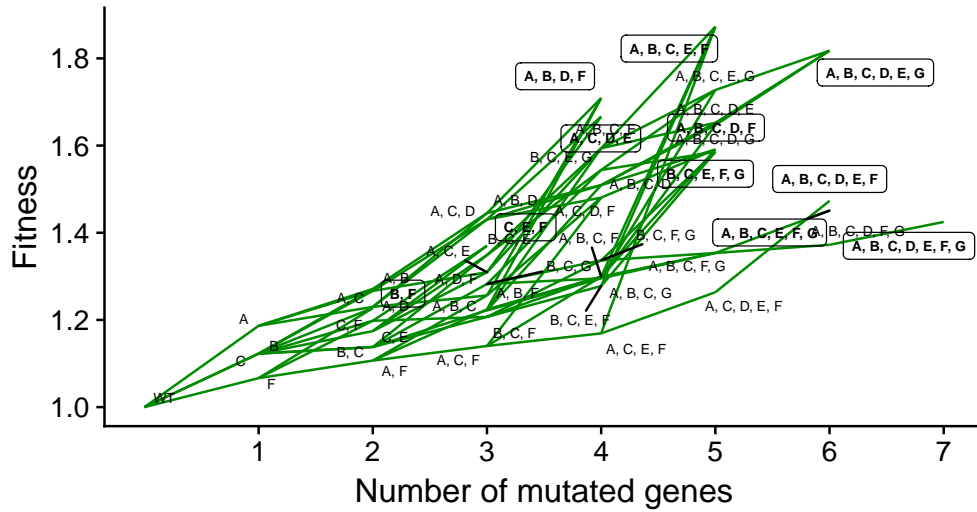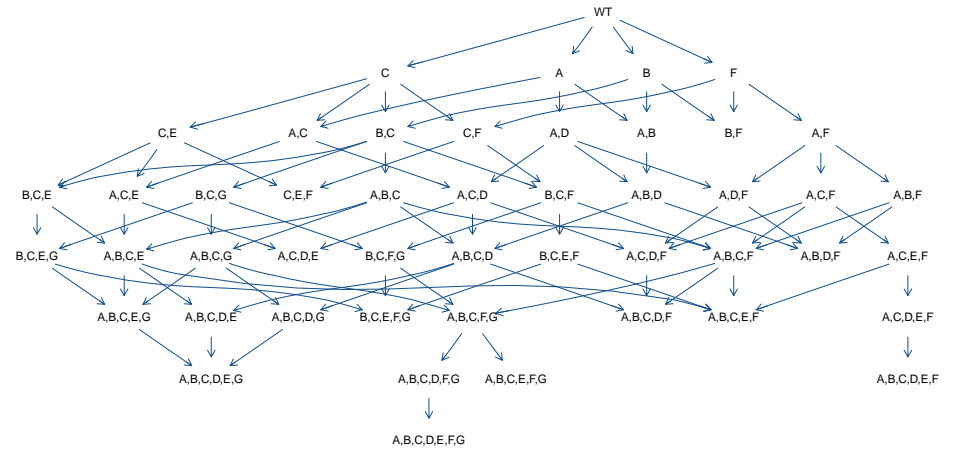

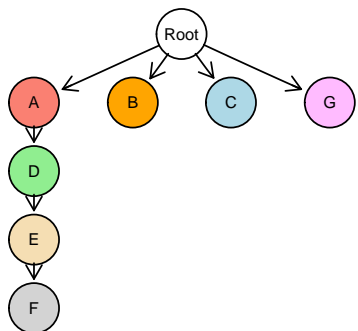

ID **K58HtWC5MFWCpF19**  
 acc genotypes **40**  
 peaks no back **7**  
 removed edges **12**  
 prop rem edges **0.13**

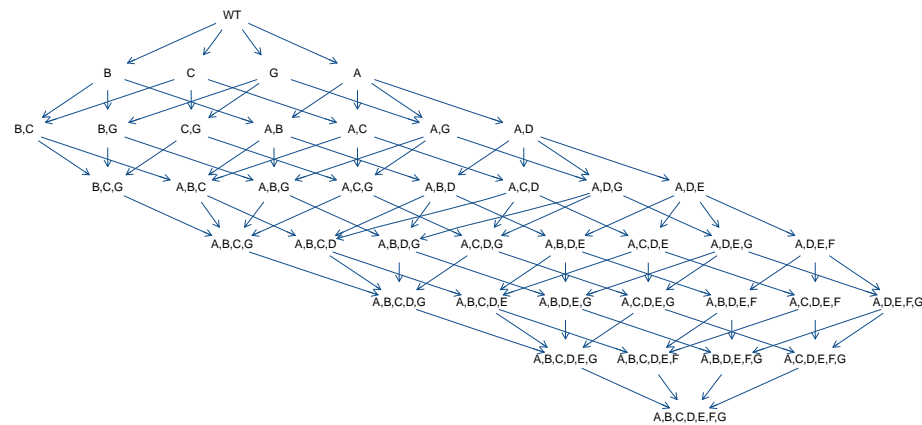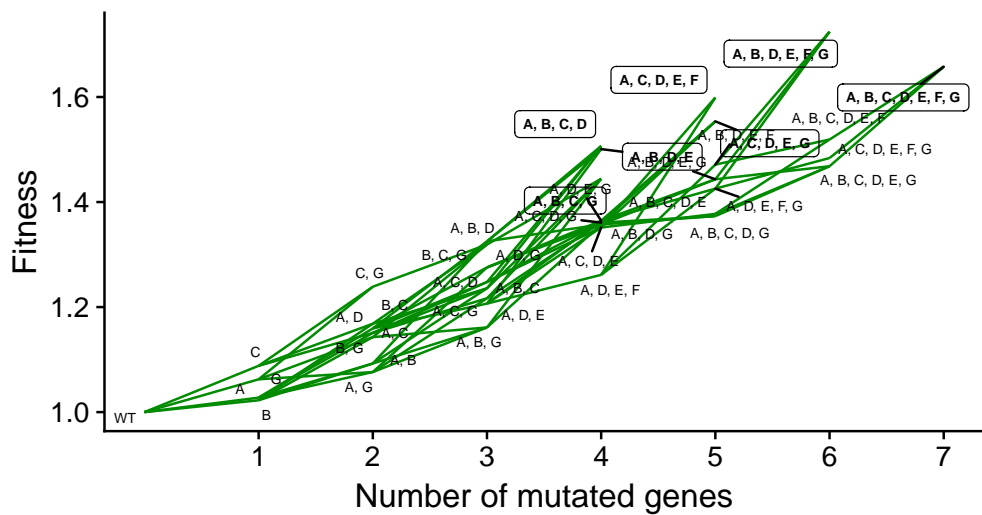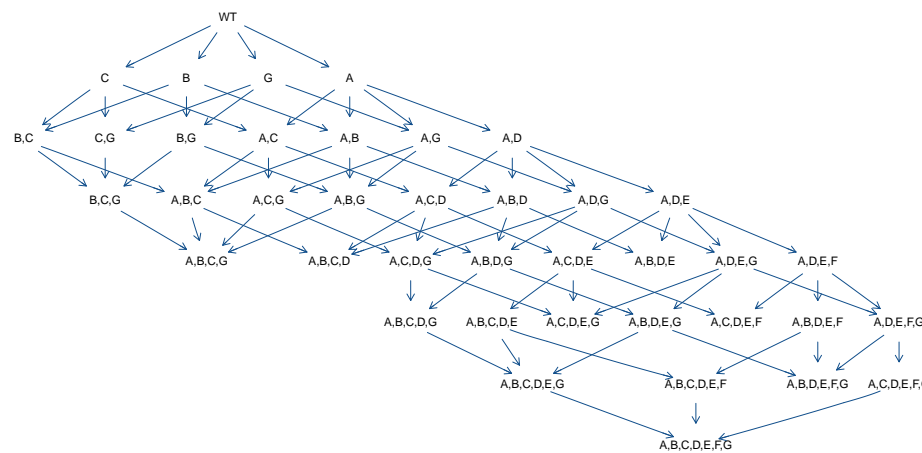



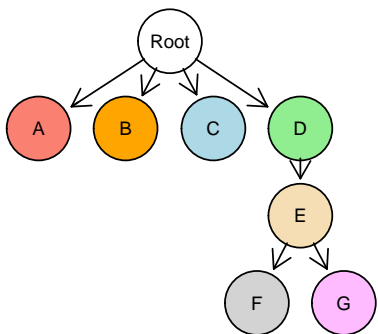

*ID* kHBNd5rumamnFMto  
*acc genotypes* 48  
*peaks no back* 7  
*removed edges* 25  
*prop rem edges* 0.208

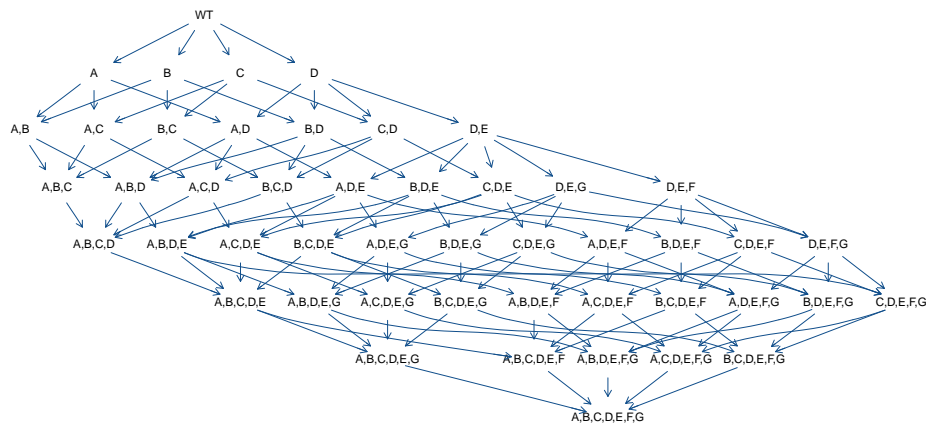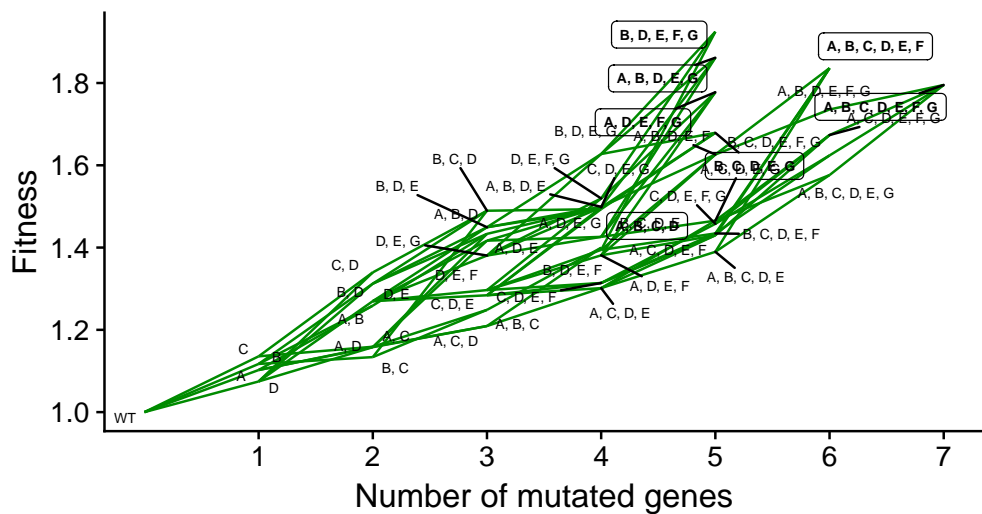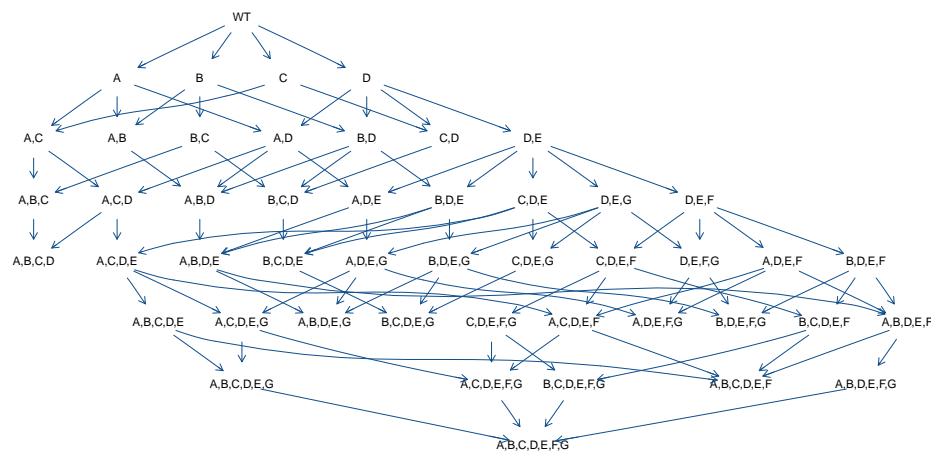

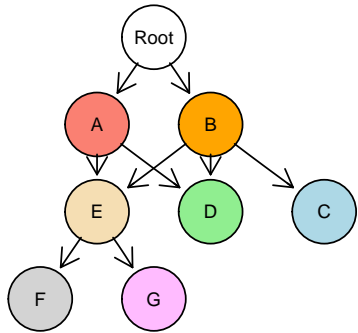

ID [kj6bITZoZL13OYX2](#)  
 acc genotypes 24  
 peaks no back 5  
 removed edges 8  
 prop rem edges 0.174

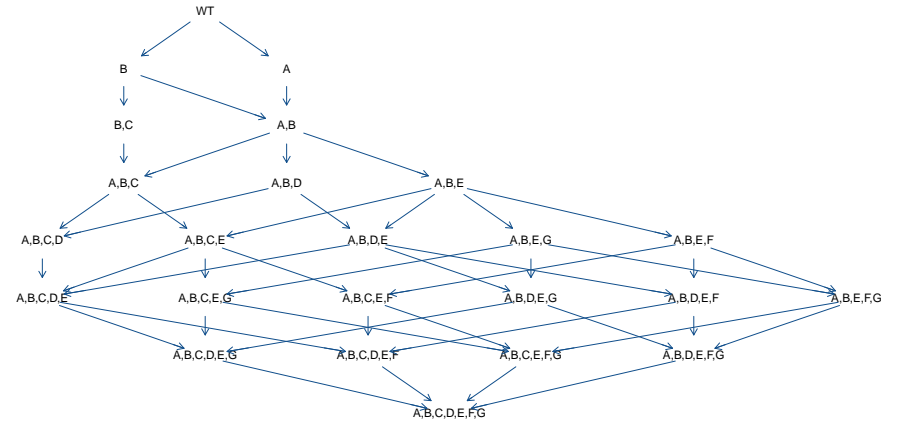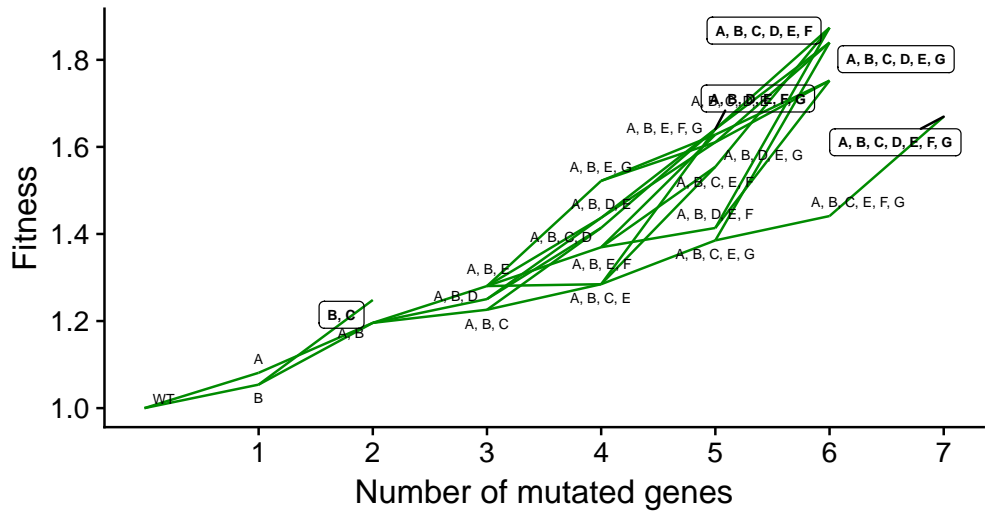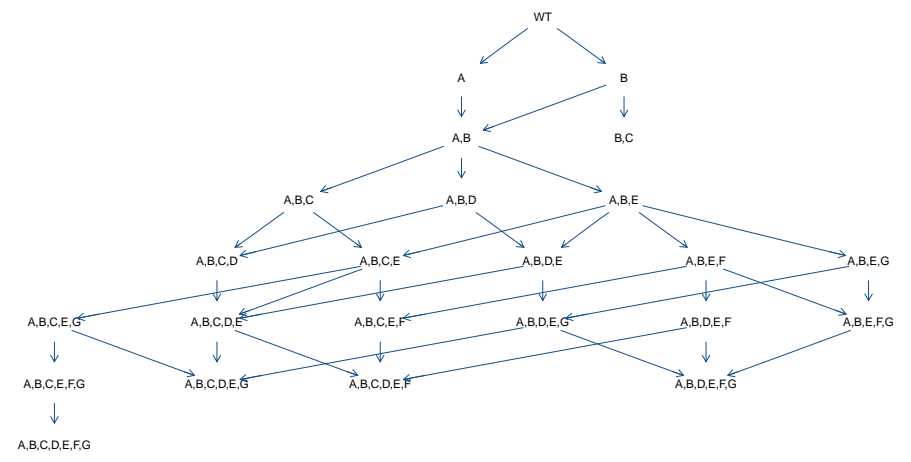

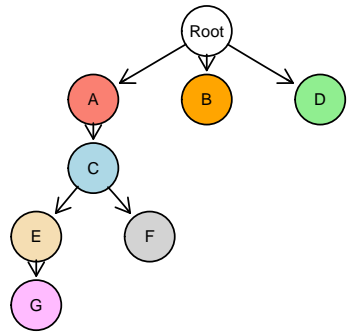

ID [L8C8OoieIFLvU98x](#)  
 acc genotypes 32  
 peaks no back 7  
 removed edges 17  
 prop rem edges 0.25

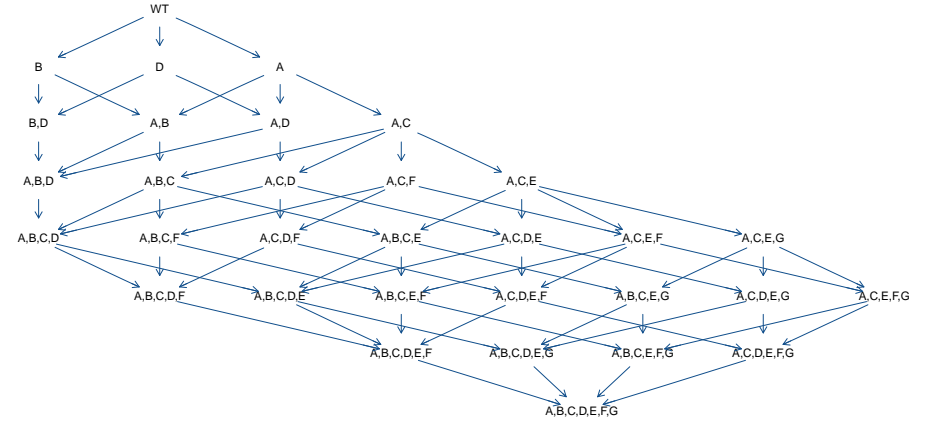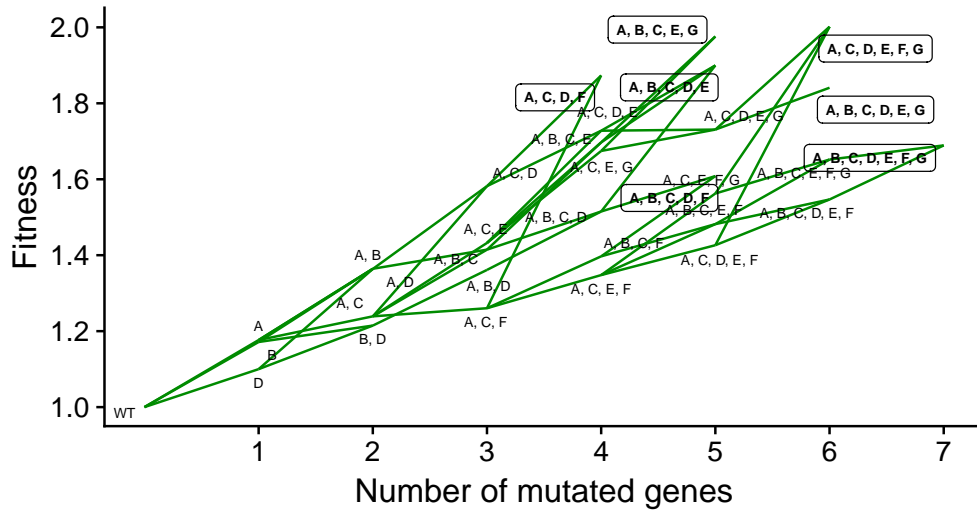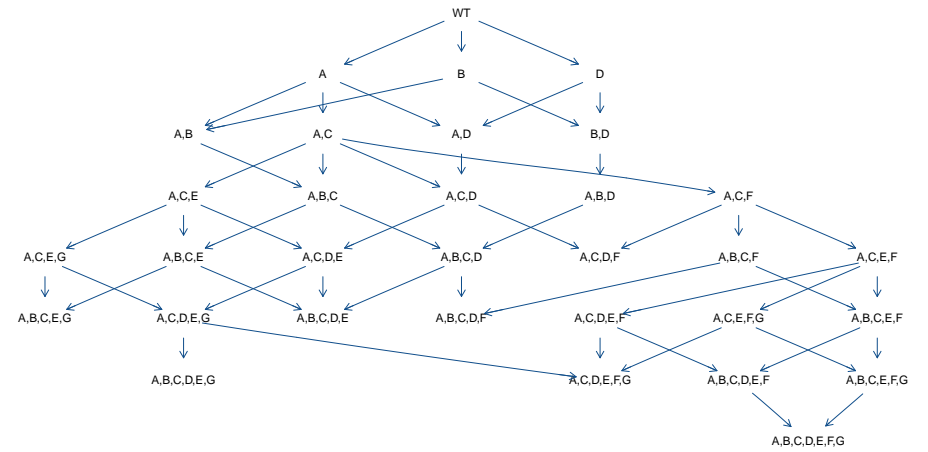

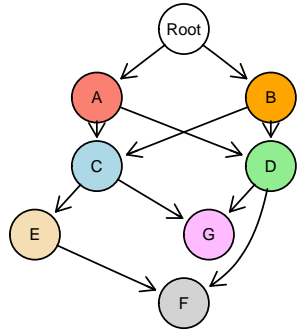

ID L9U6EXaxa4AgbWdQ  
 acc genotypes 13  
 peaks no back 3  
 removed edges 2  
 prop rem edges 0.118

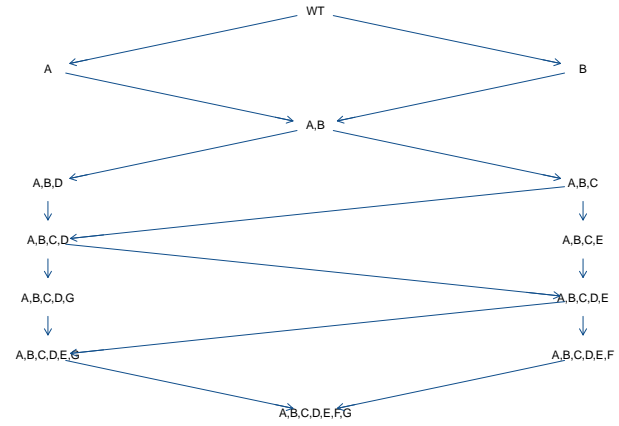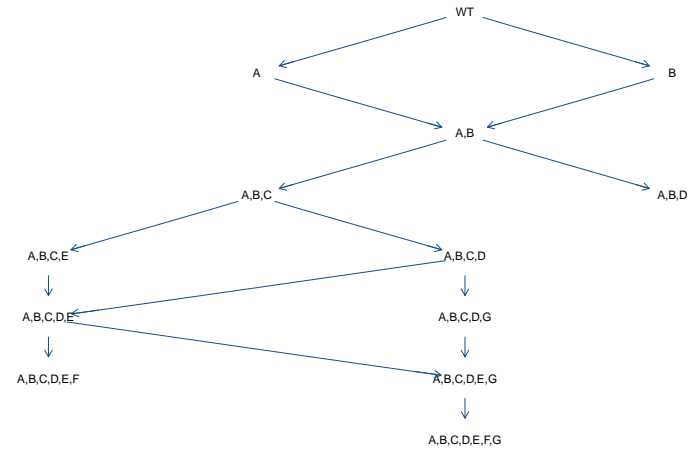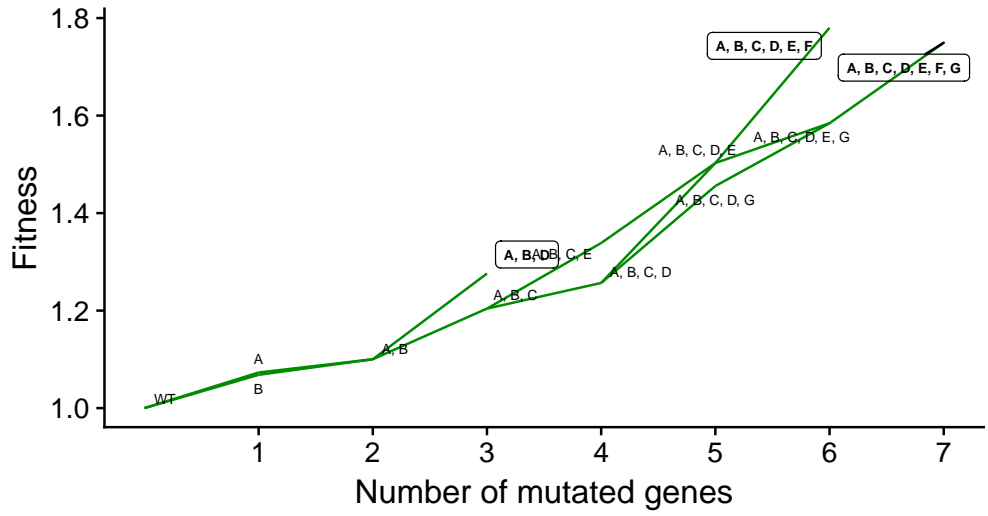

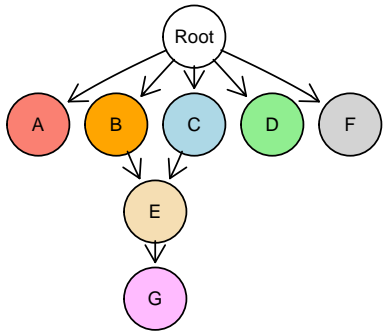

ID [IDsDxkW7aWMDoTYv](#)  
 acc genotypes 48  
 peaks no back 8  
 removed edges 27  
 prop rem edges 0.225

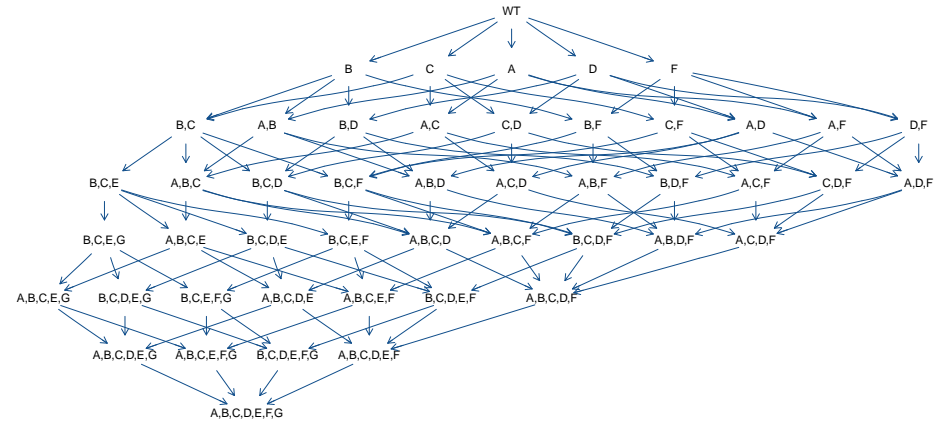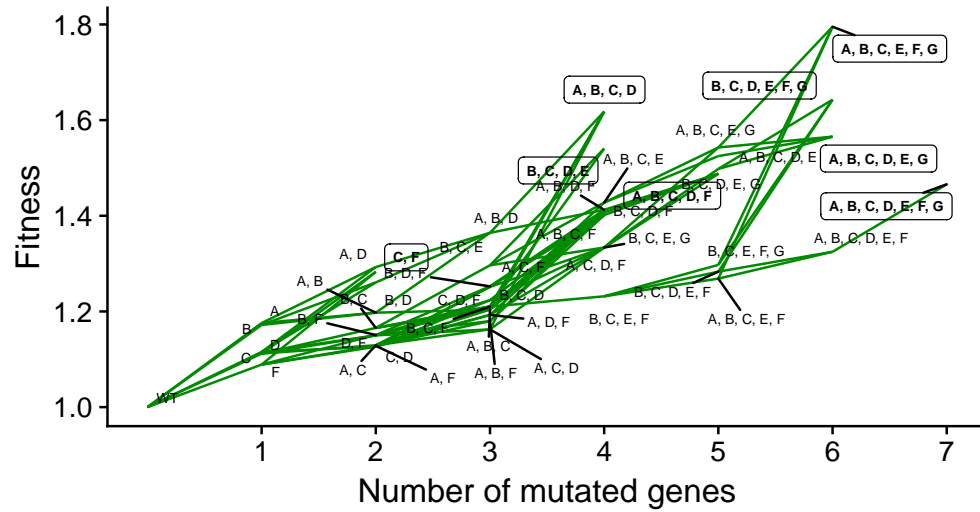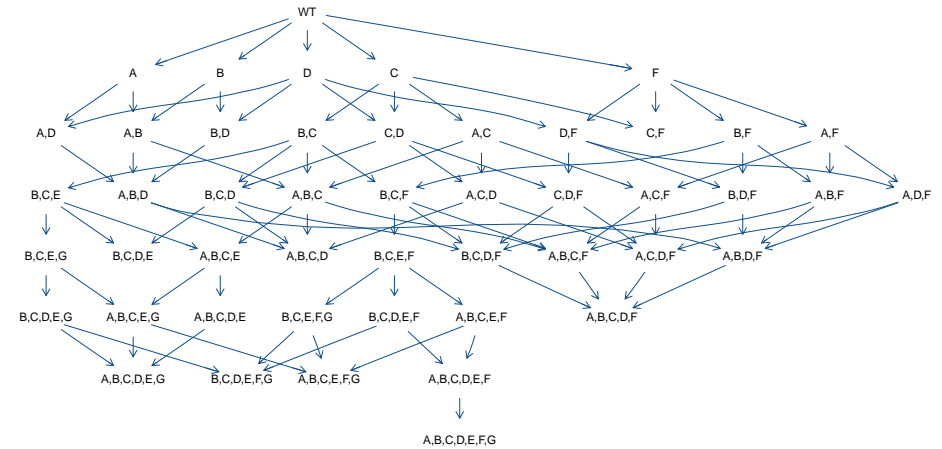

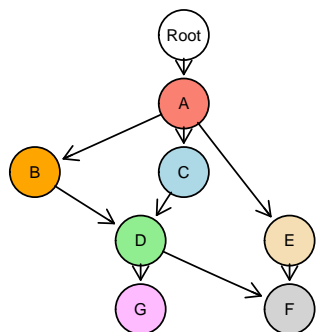

ID **Lh10CtFMPrzzV6ihq**  
 acc genotypes **15**  
 peaks no back **2**  
 removed edges **1**  
 prop rem edges **0.045**

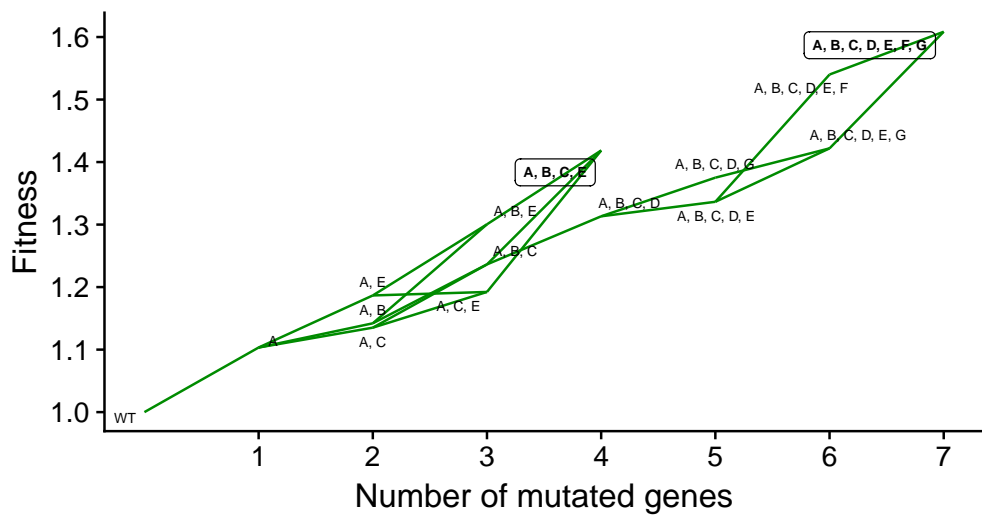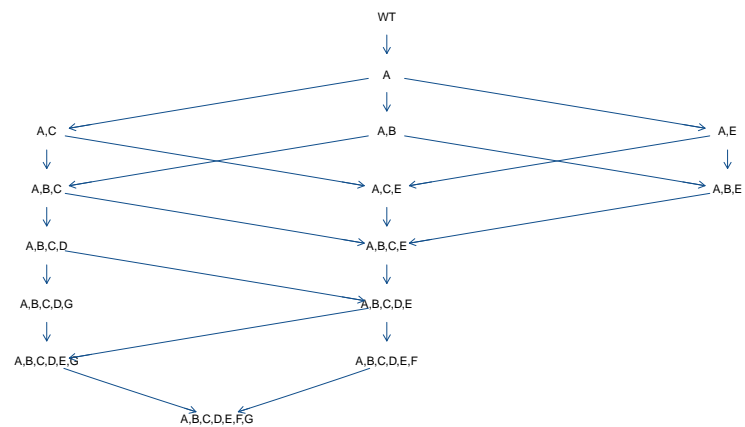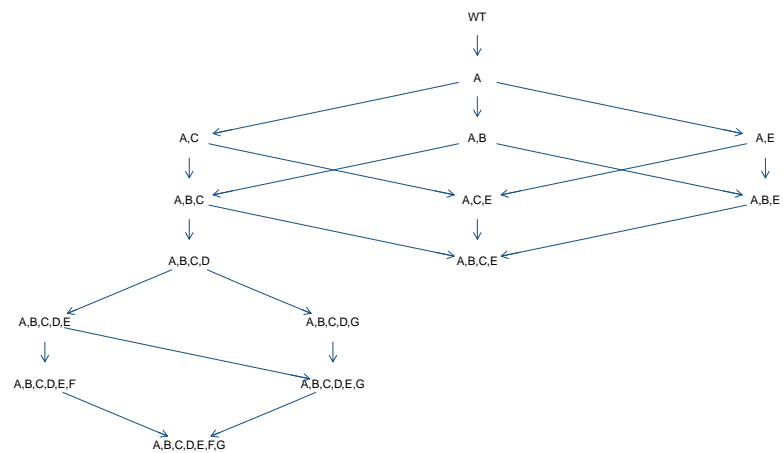

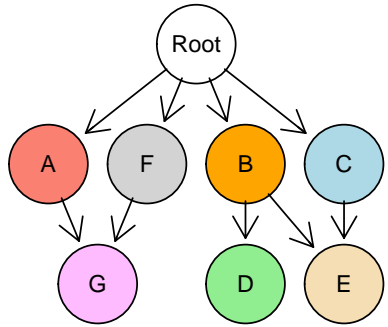

ID **LqgKBG79CNzADijg**  
 acc genotypes **40**  
 peaks no back **6**  
 removed edges **14**  
 prop rem edges **0.156**

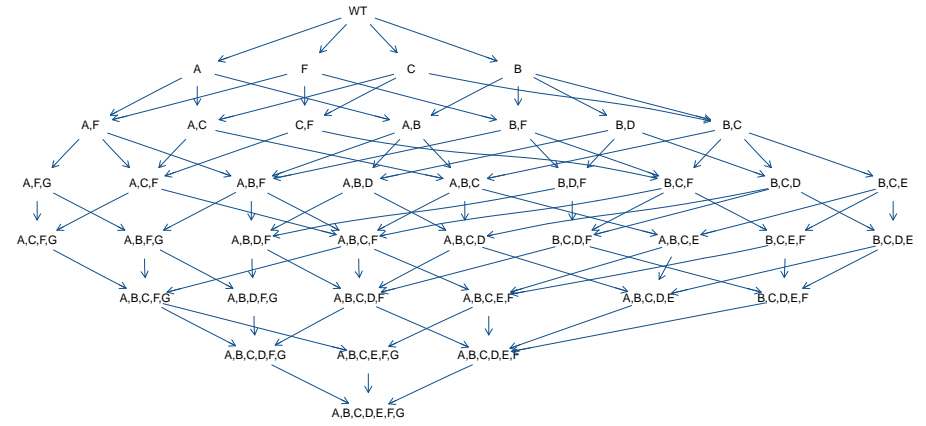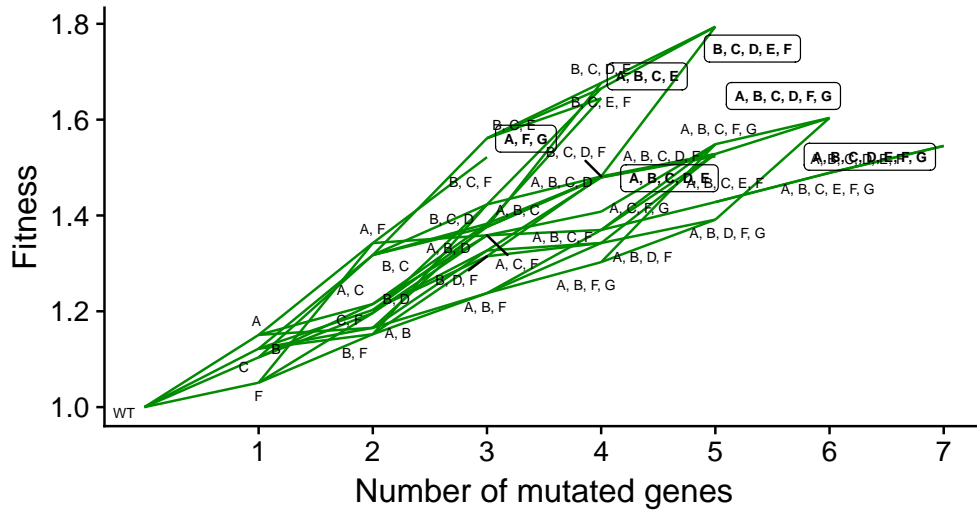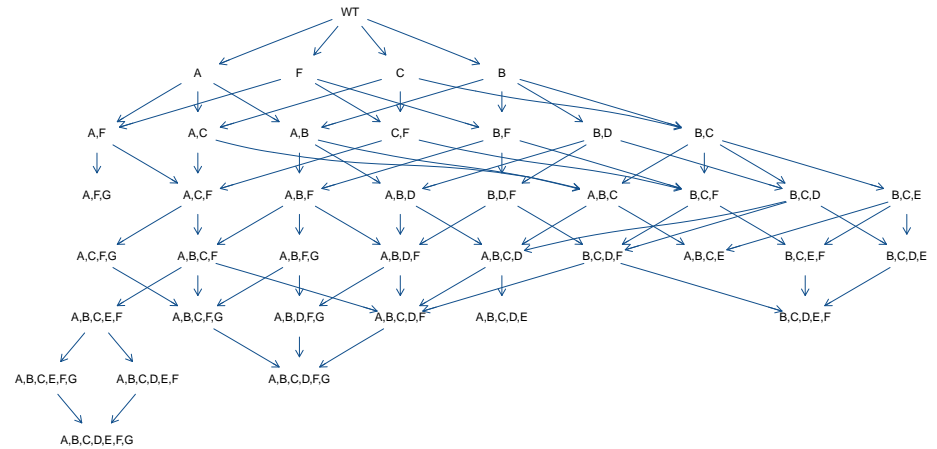

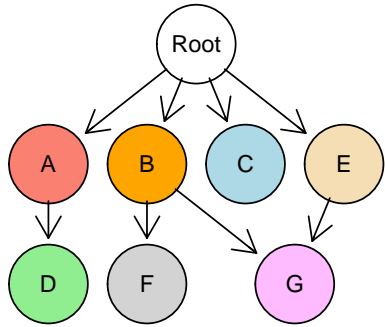

ID **lsG2NZmtk5W2NxDs**  
 acc genotypes **48**  
 peaks no back **7**  
 removed edges **17**  
 prop rem edges **0.147**

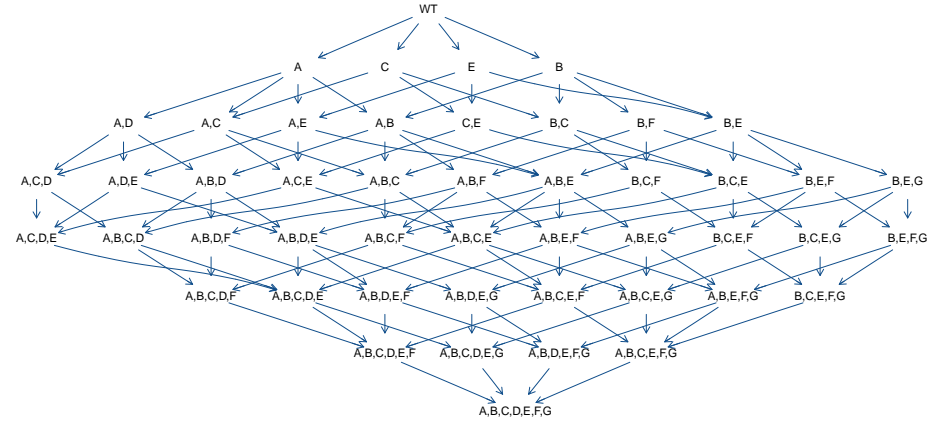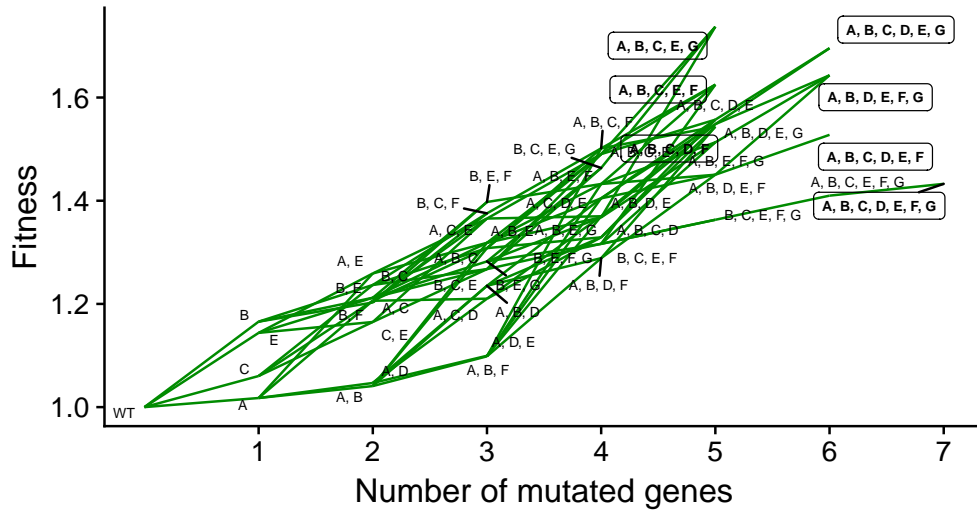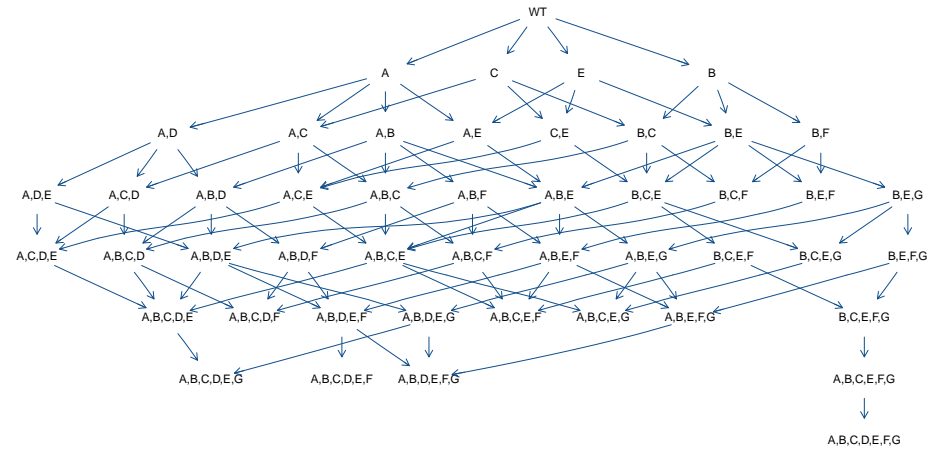



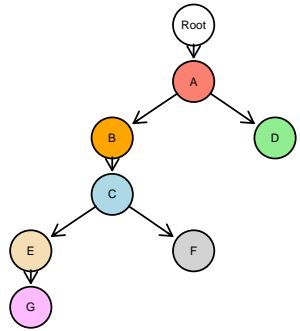

ID **lsjclB1mAC8mHR9Q**  
 acc genotypes **17**  
 peaks no back **3**  
 removed edges **3**  
 prop rem edges **0.111**

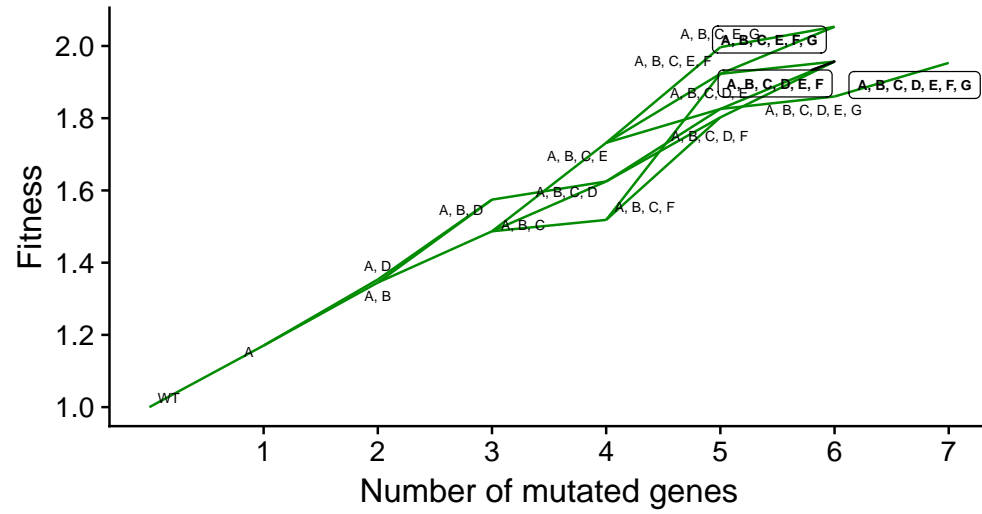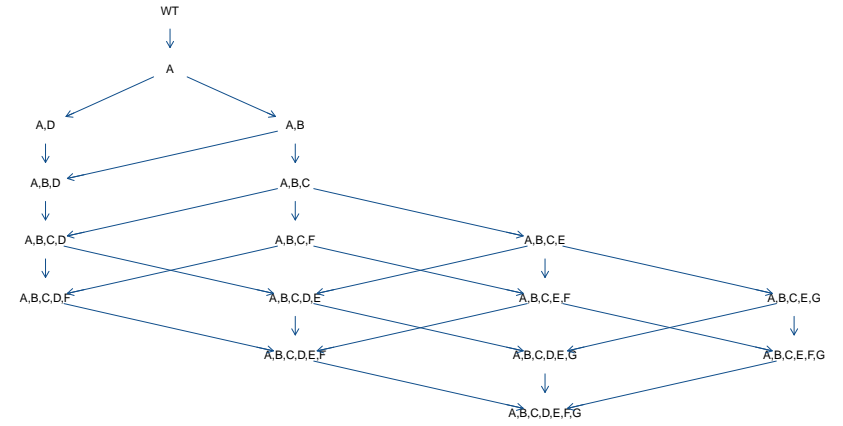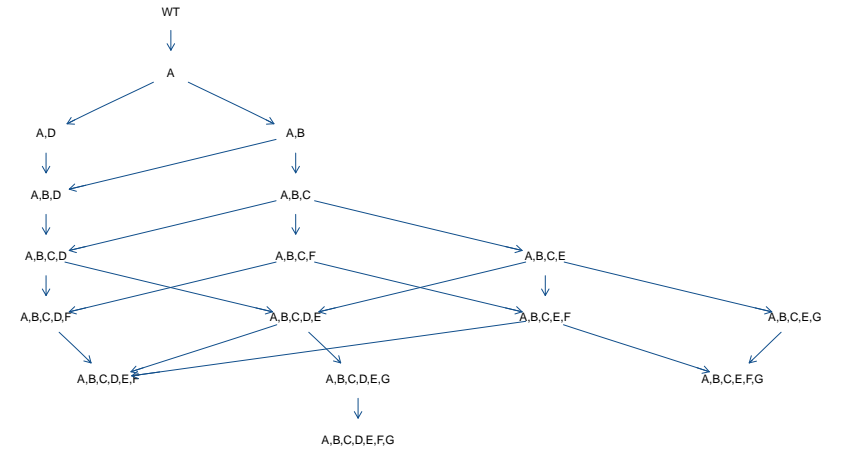

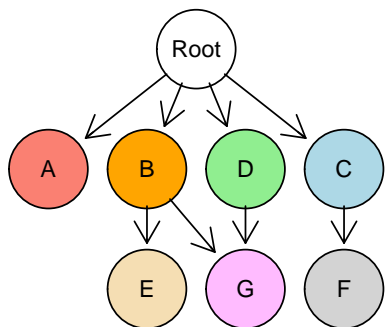

ID **L5nOGiz5m5AoyDGr**  
 acc genotypes **48**  
 peaks no back **7**  
 removed edges **17**  
 prop rem edges **0.147**

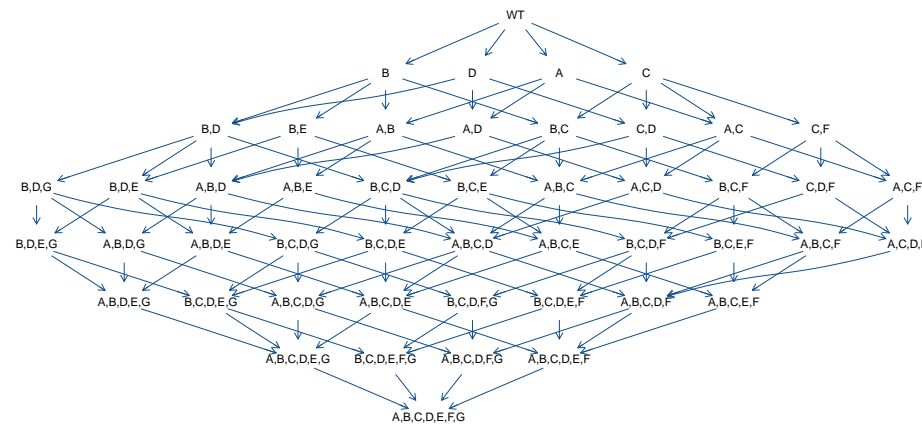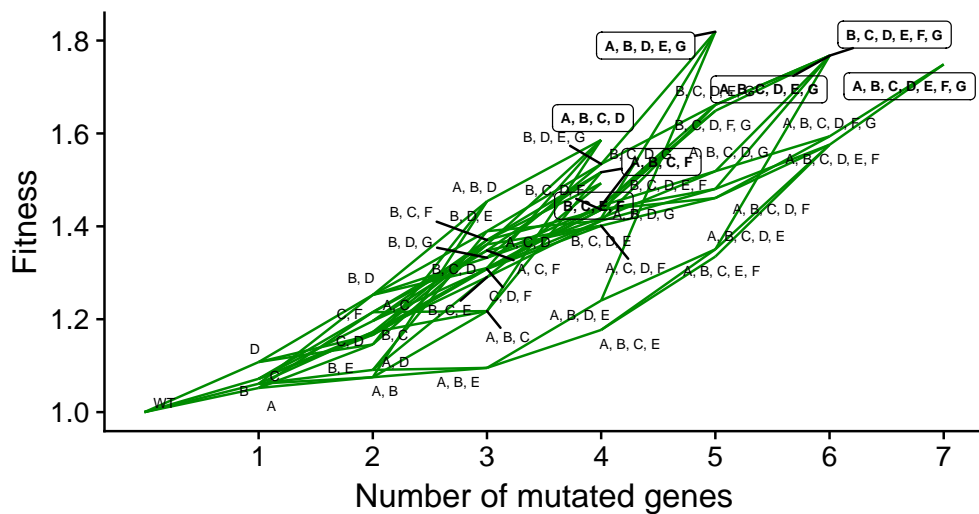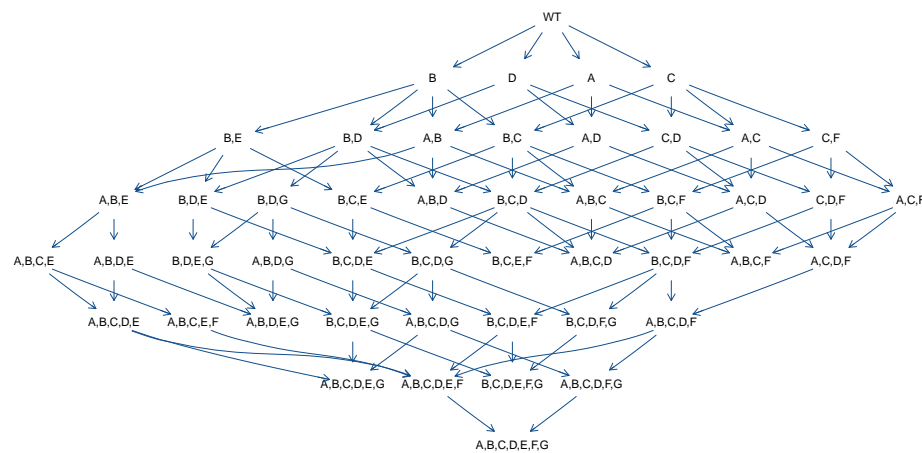

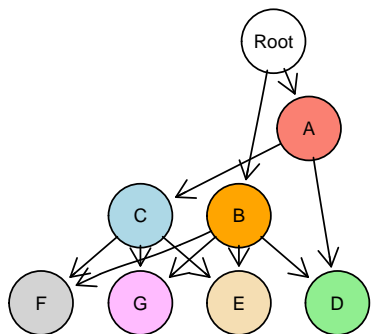

ID **LSXwTnPZnOfXSdzA**  
 acc genotypes **22**  
 peaks no back **2**  
 removed edges **2**  
 prop rem edges **0.049**

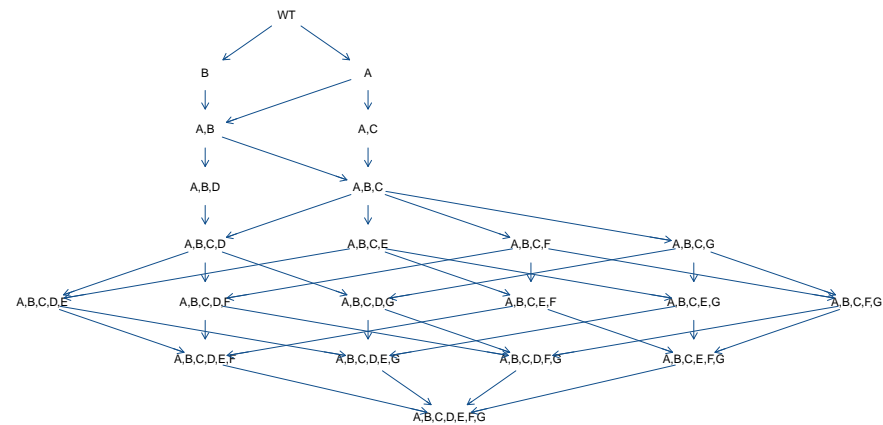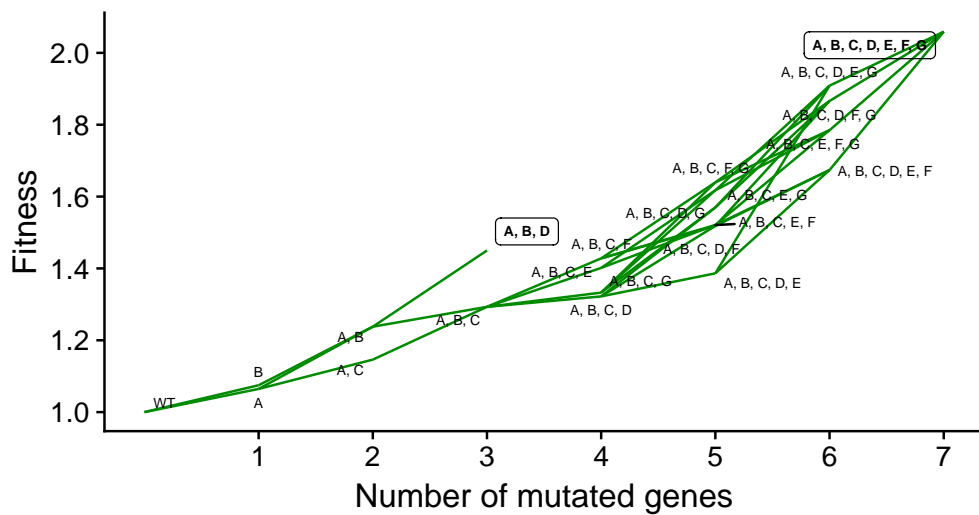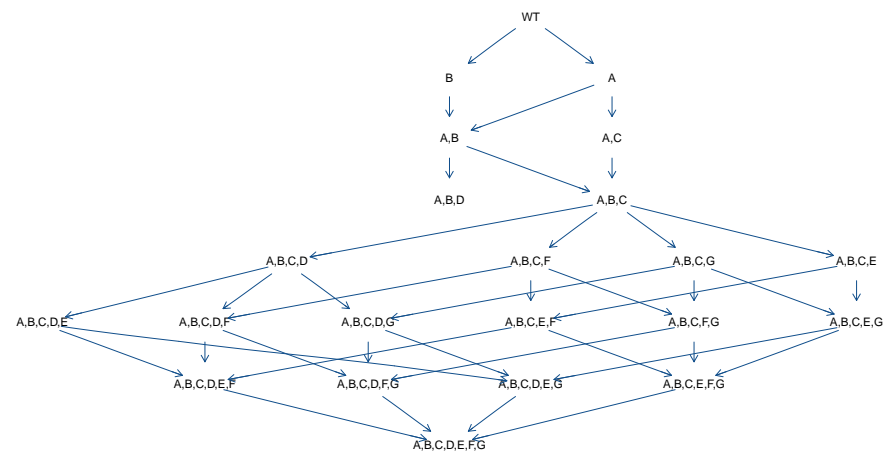

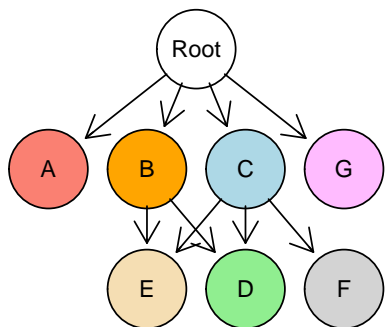

ID **IsZUuCCknMZno10B8**  
 acc genotypes **48**  
 peaks no back **8**  
 removed edges **21**  
 prop rem edges **0.175**

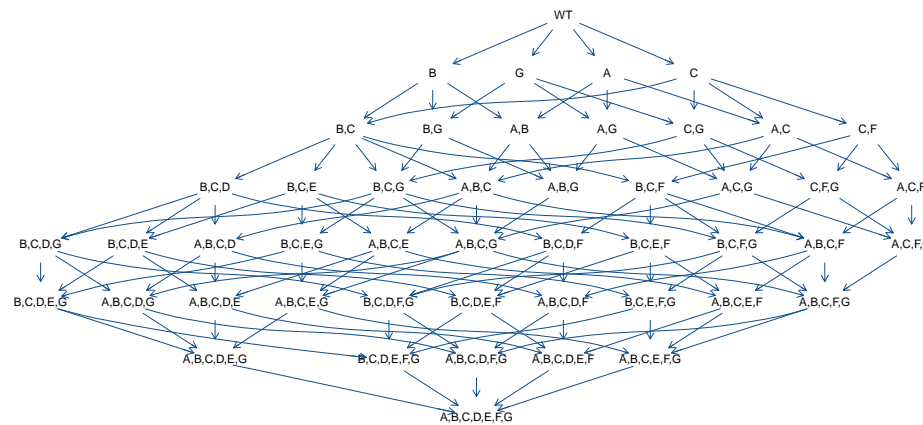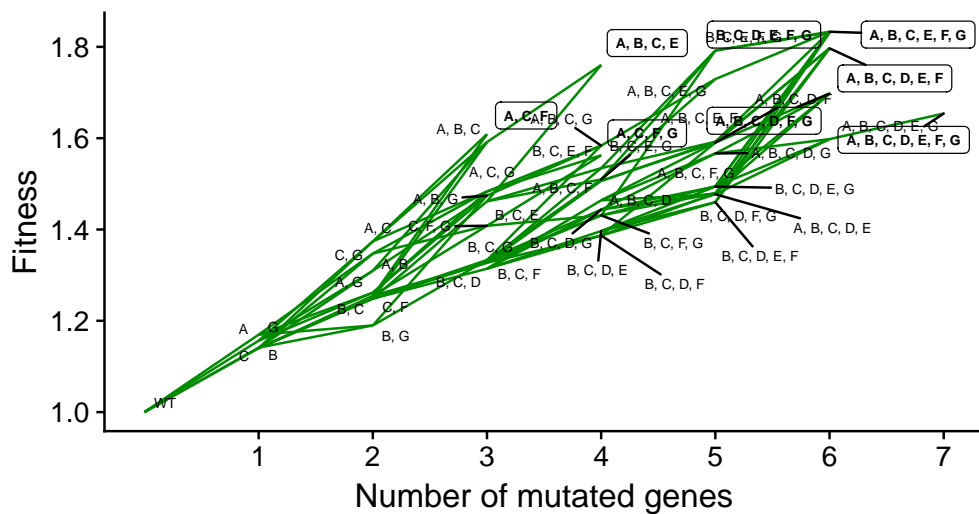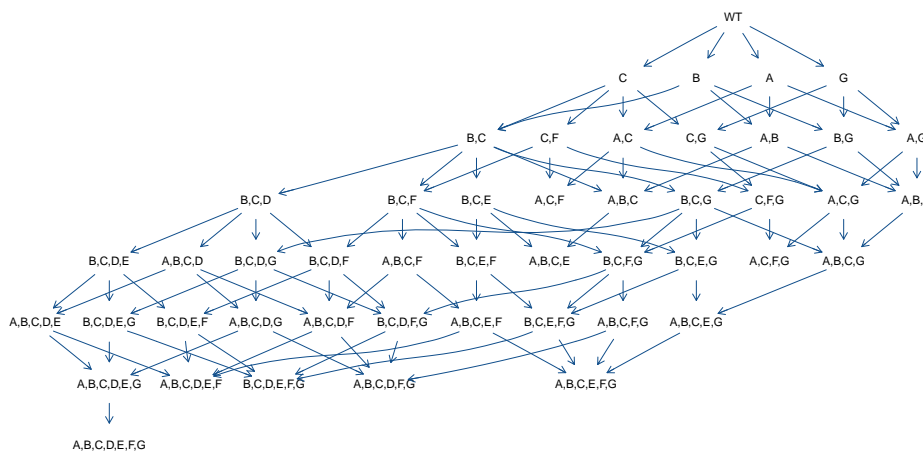

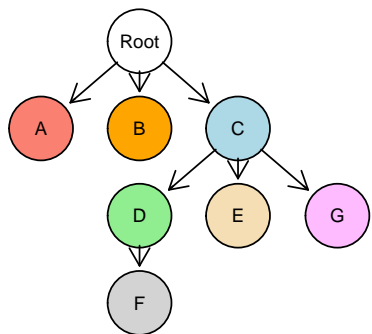

ID **m3T5PDQjmlID9CNk**  
 acc genotypes **52**  
 peaks no back **3**  
 removed edges **17**  
 prop rem edges **0.125**

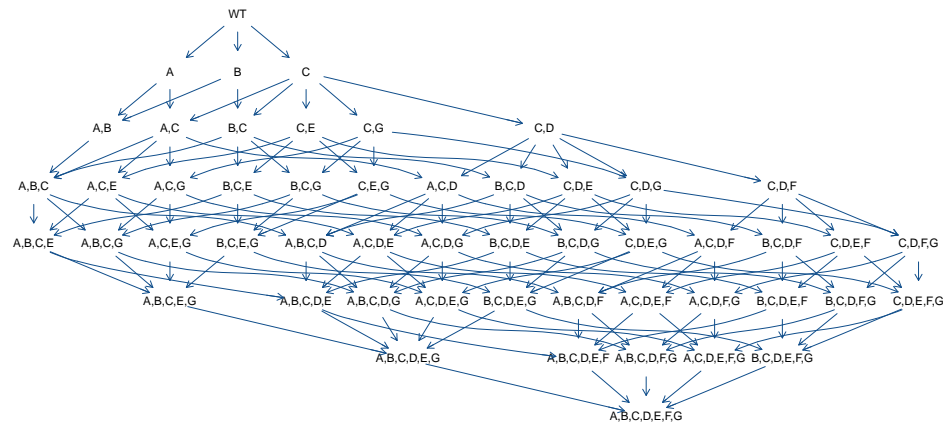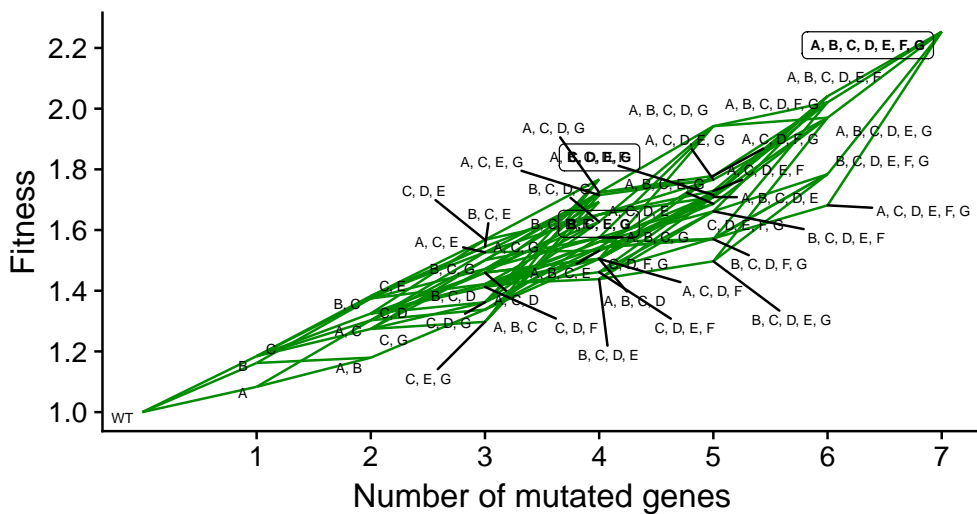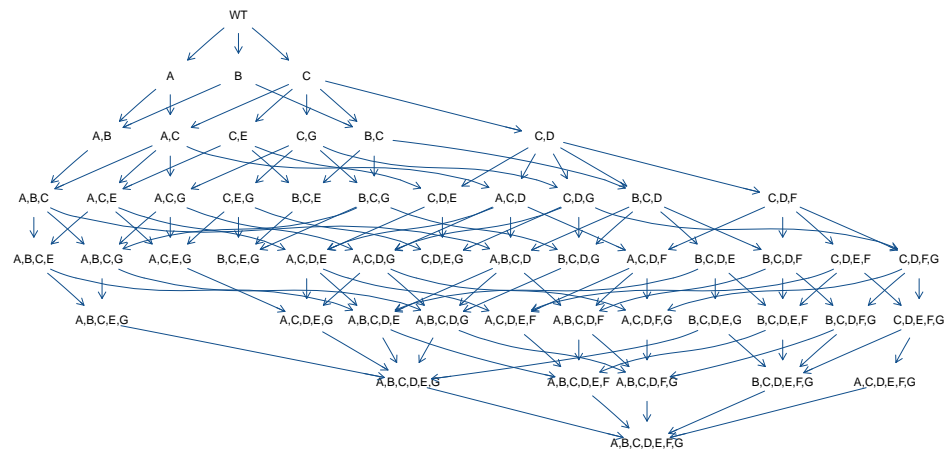

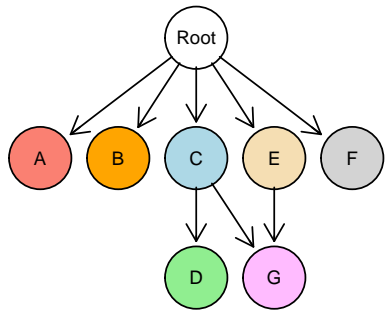

ID **m8kM7ayaSoitwqmo**  
 acc genotypes **64**  
 peaks no back **11**  
 removed edges **36**  
 prop rem edges **0.205**

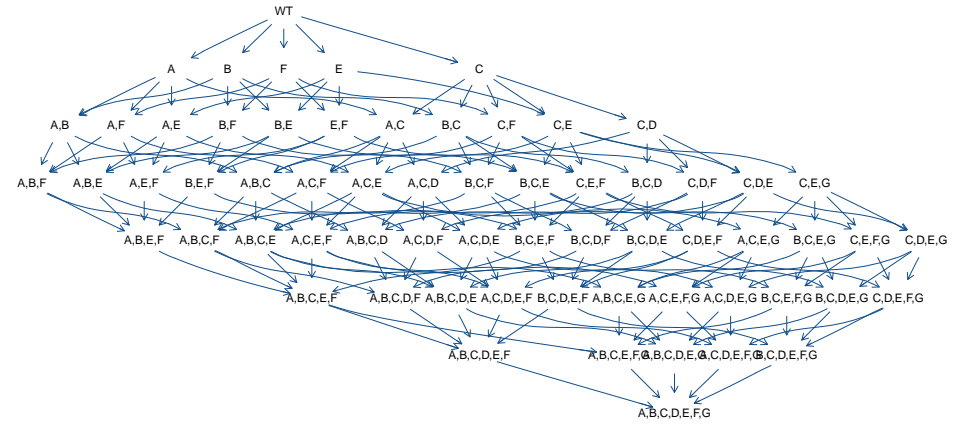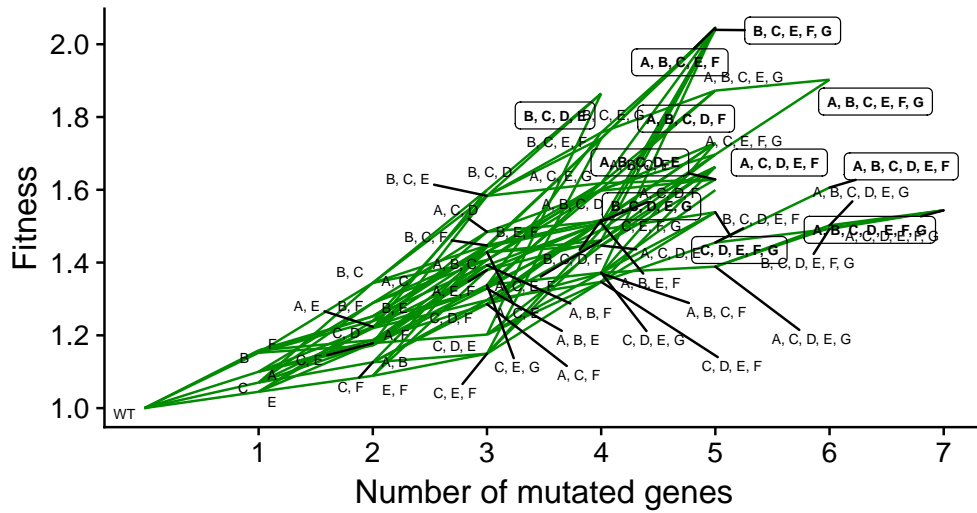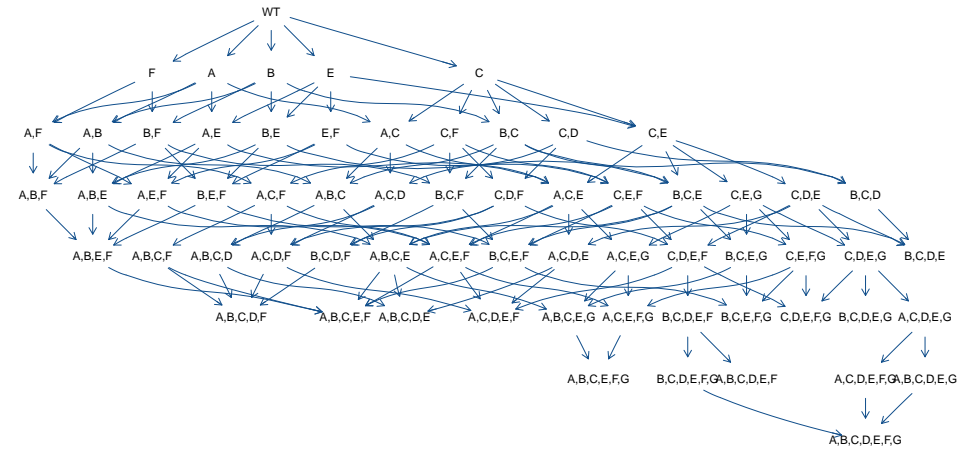

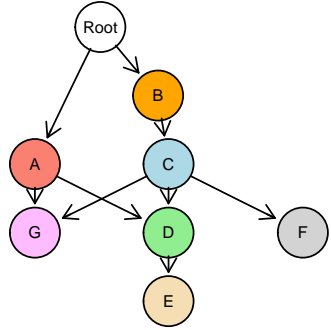

ID **MHkrL757u9iPj10kv**  
 acc genotypes **18**  
 peaks no back **4**  
 removed edges **4**  
 prop rem edges **0.138**

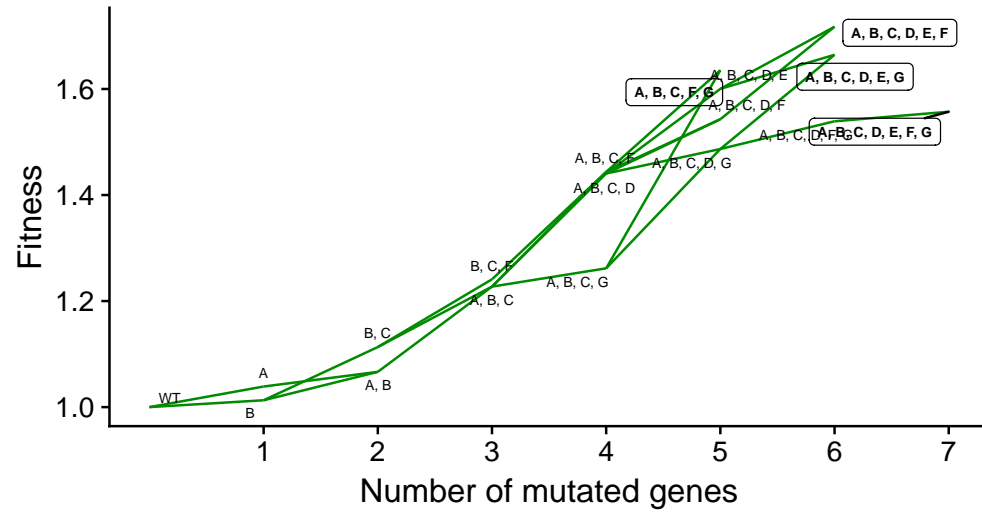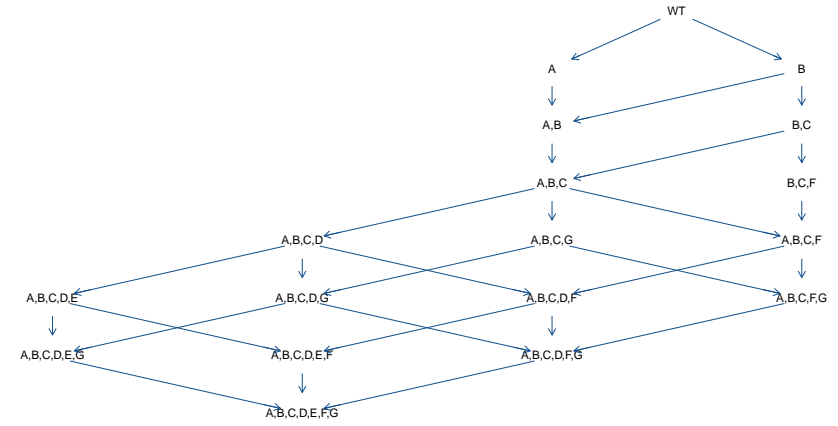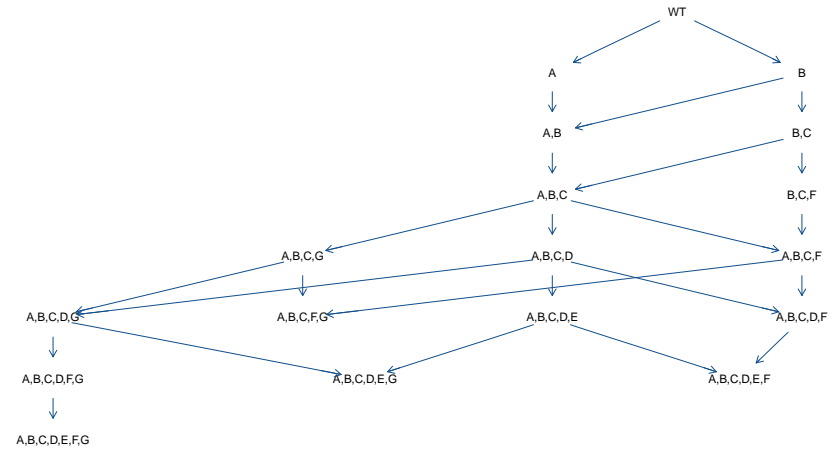

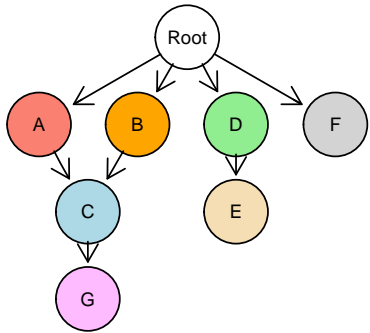

ID **MifrHKJzEqocbcMH**  
 acc genotypes **36**  
 peaks no back **3**  
 removed edges **9**  
 prop rem edges **0.115**

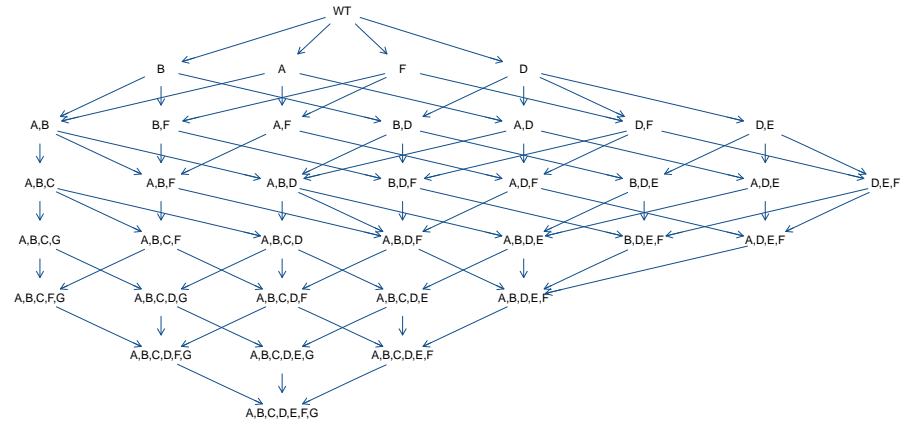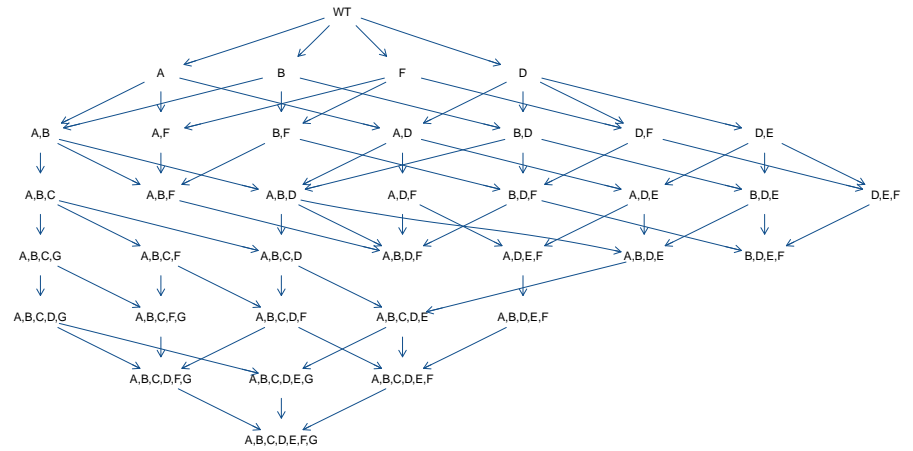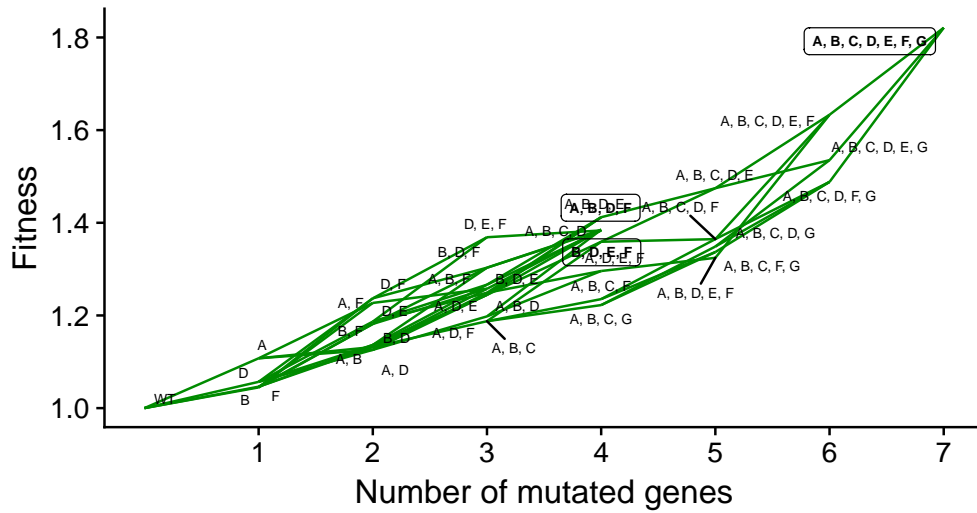



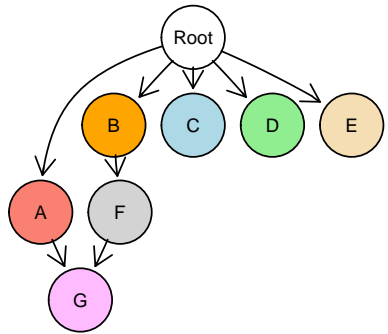

ID **mtZbHQ97Njy8xIsf**  
 acc genotypes **56**  
 peaks no back **10**  
 removed edges **26**  
 prop rem edges **0.176**

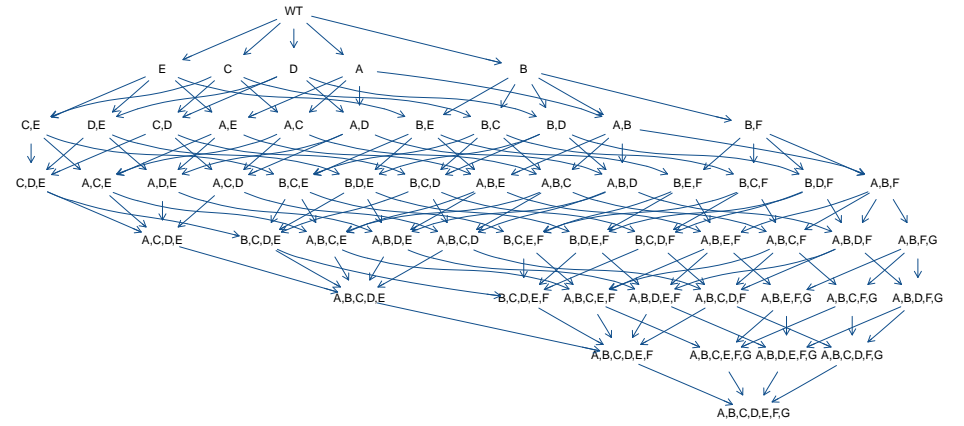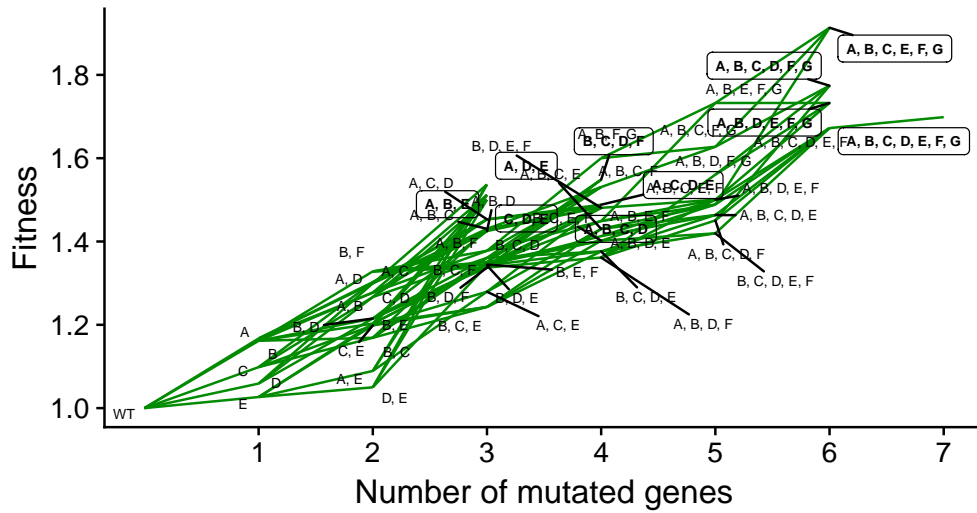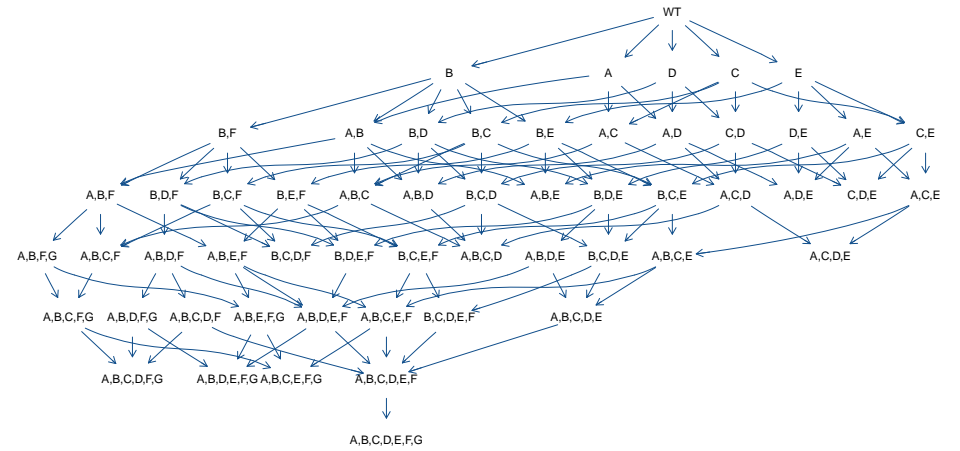

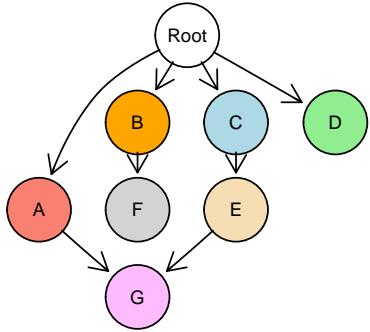

ID **MuAVAUt10hjGNt5AD**  
 acc genotypes **42**  
 peaks no back **7**  
 removed edges **15**  
 prop rem edges **0.155**

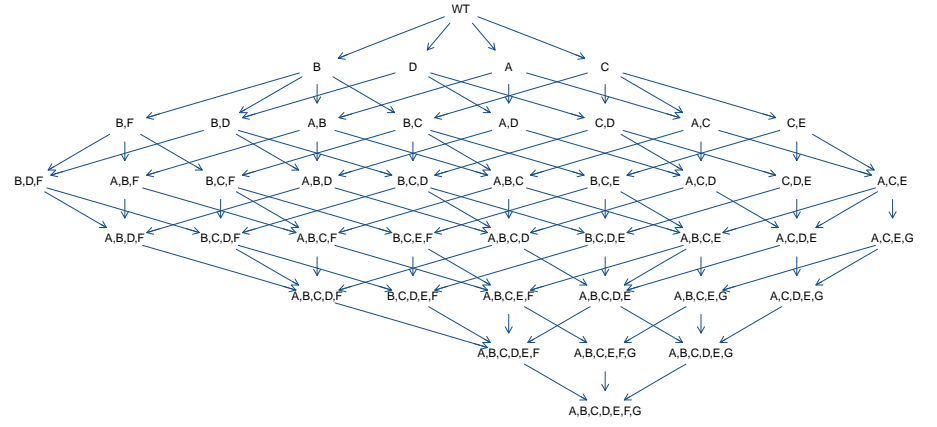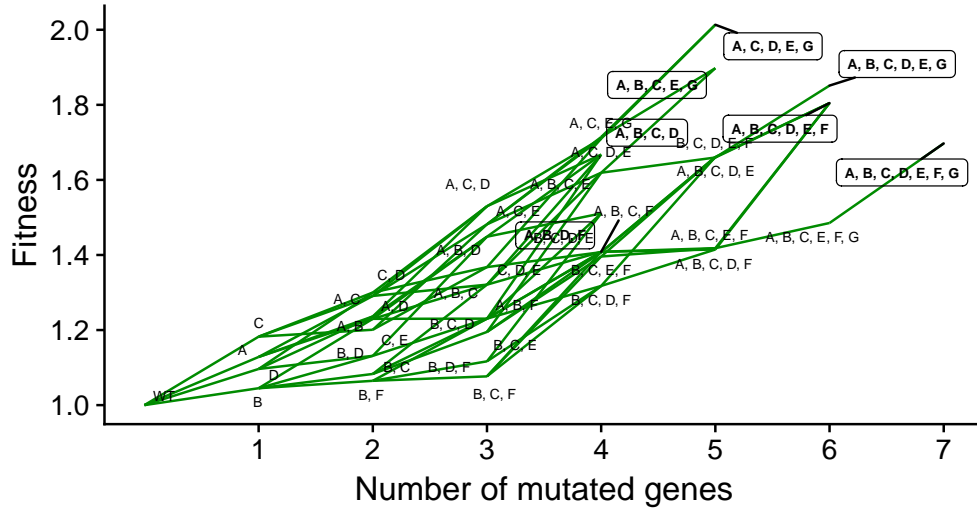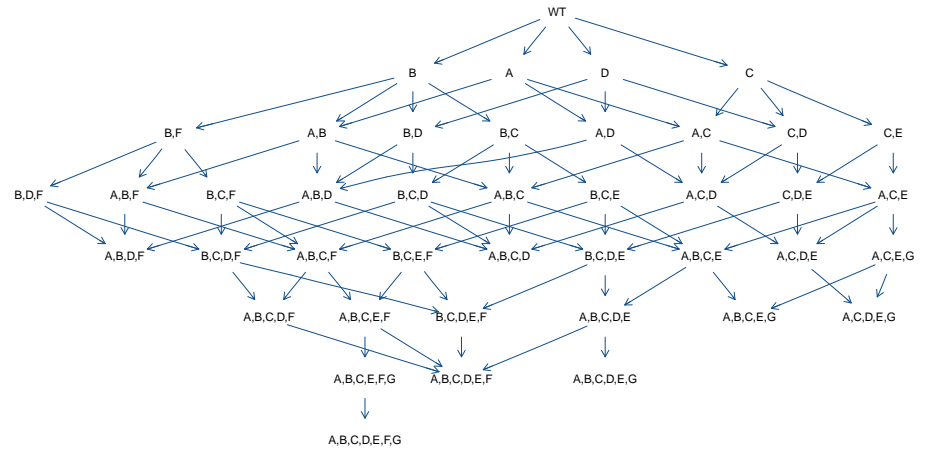

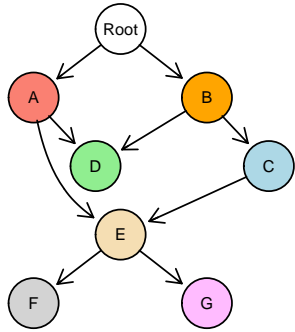

ID [mZBzm7cVIBm3NJil](#)  
 acc genotypes 16  
 peaks no back 2  
 removed edges 2  
 prop rem edges 0.083

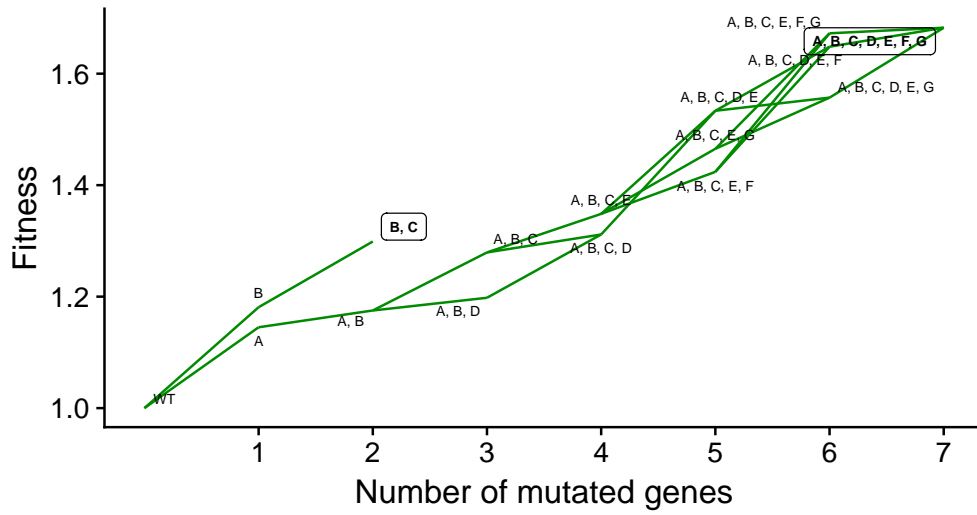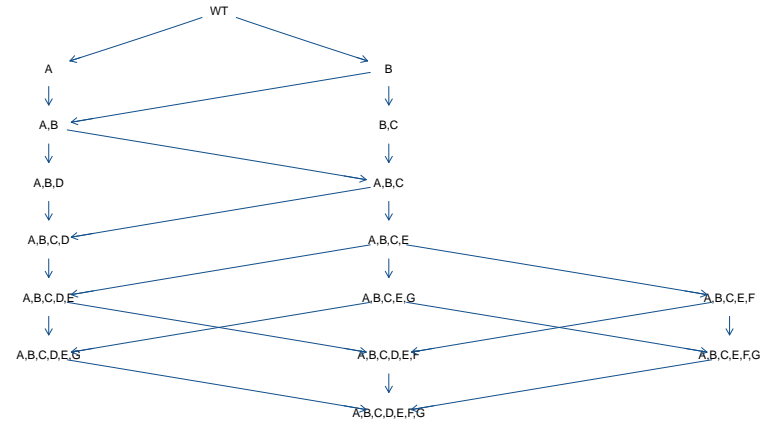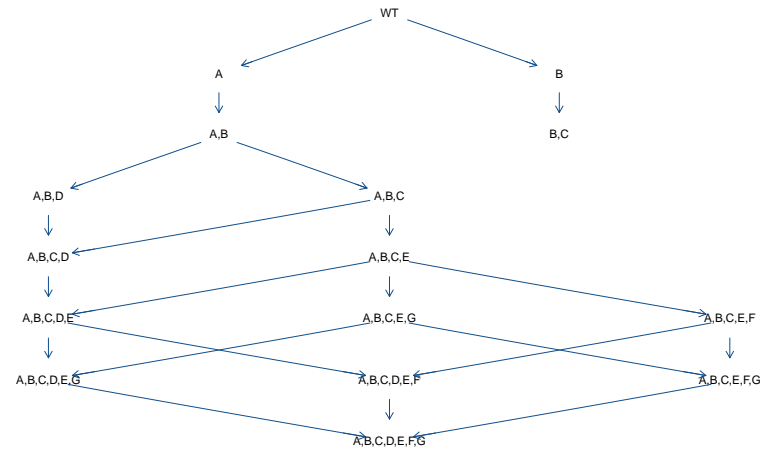

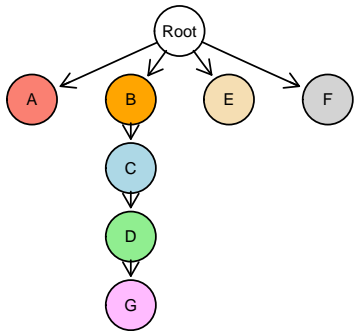

ID **N7LwhGSvS3wDt8P2**  
 acc genotypes **40**  
 peaks no back **7**  
 removed edges **13**  
 prop rem edges **0.141**

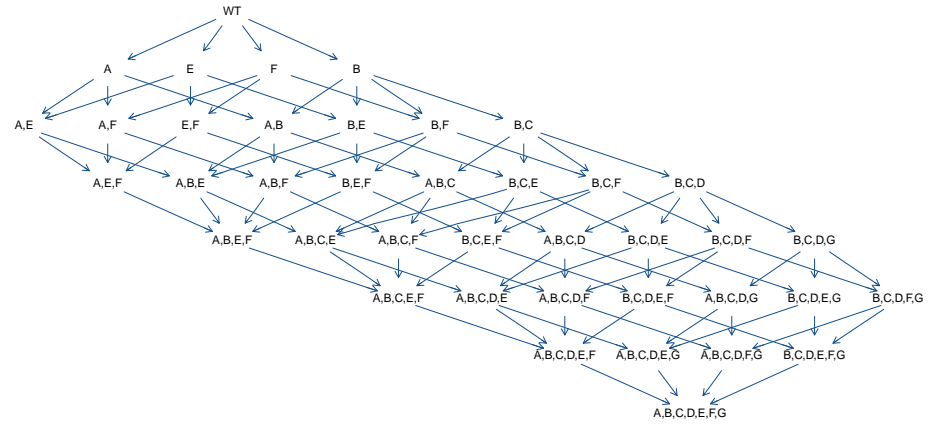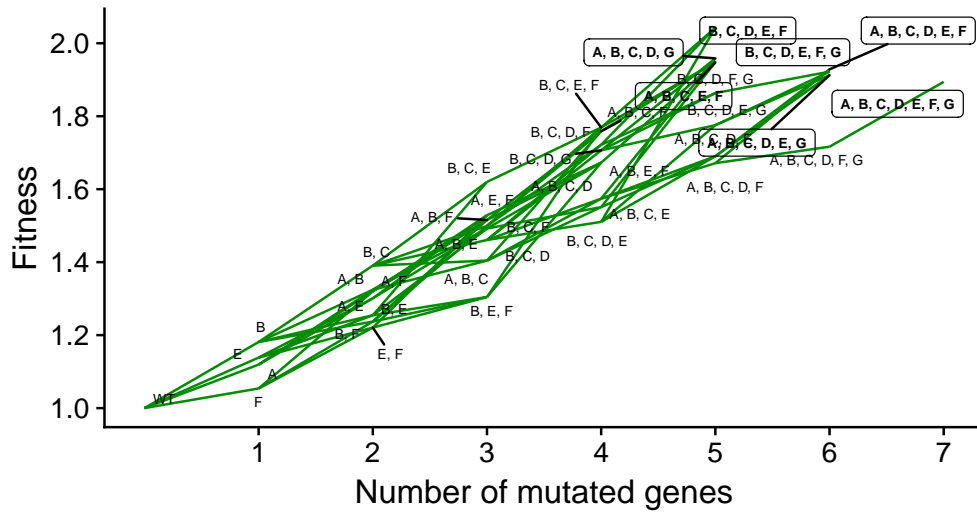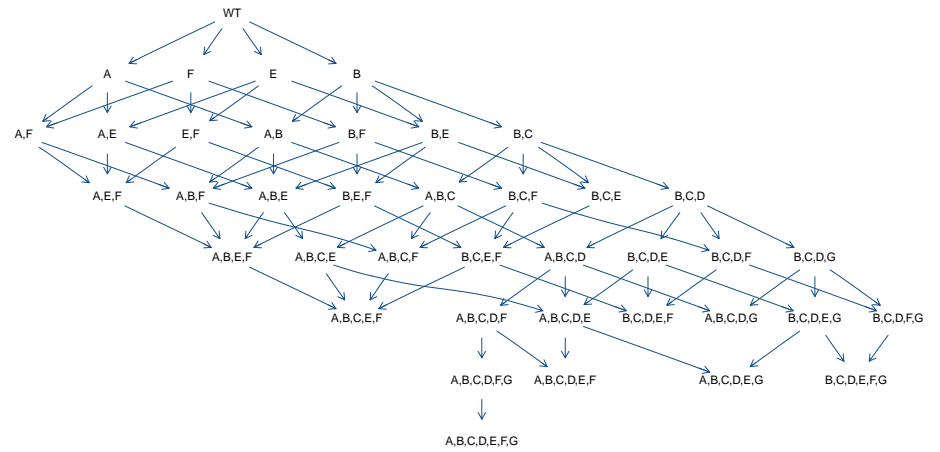

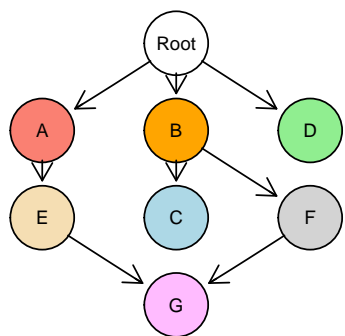

ID **nAB3TW1qrCNzLA92**  
 acc genotypes **34**  
 peaks no back **5**  
 removed edges **10**  
 prop rem edges **0.137**

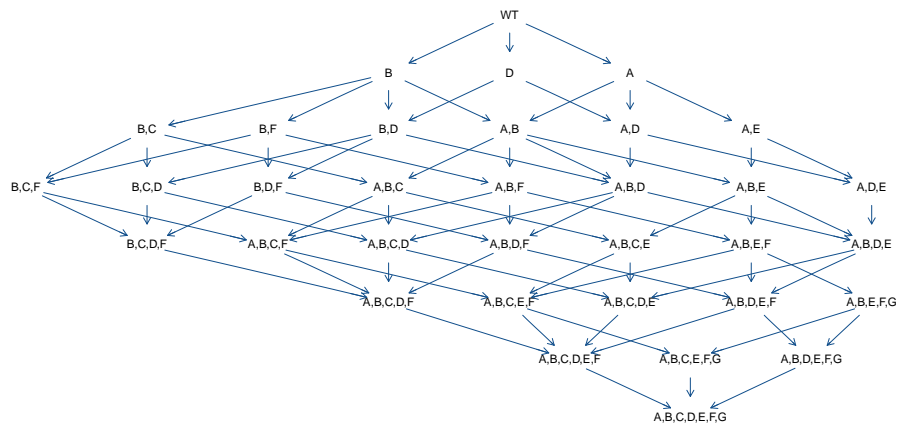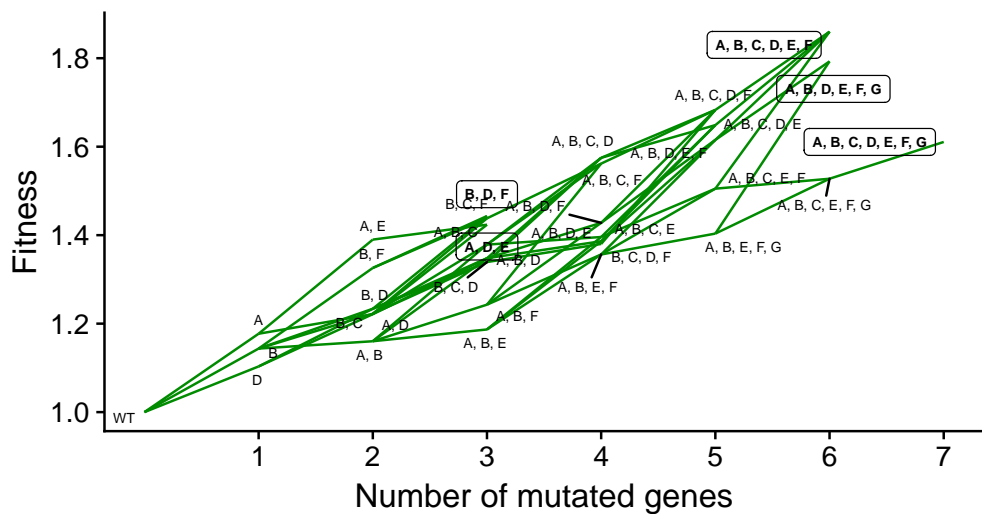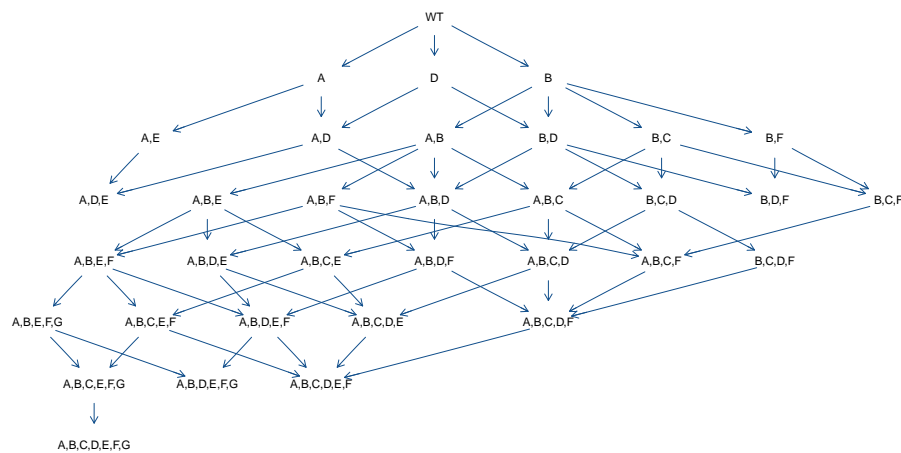

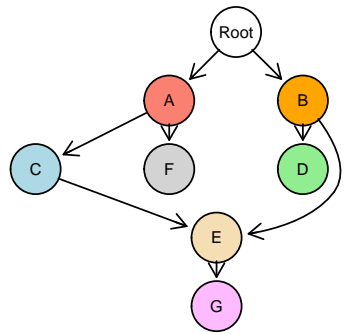

ID **Nc8hEZJTu6Jz10xm**  
 acc genotypes **23**  
 peaks no back **5**  
 removed edges **9**  
 prop rem edges **0.22**

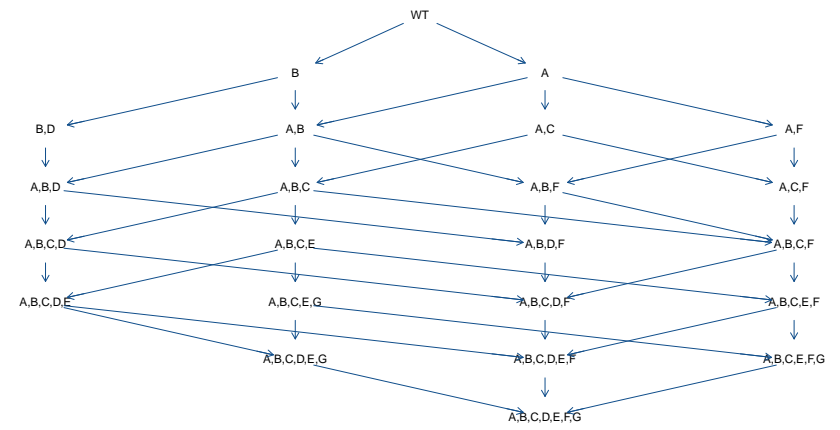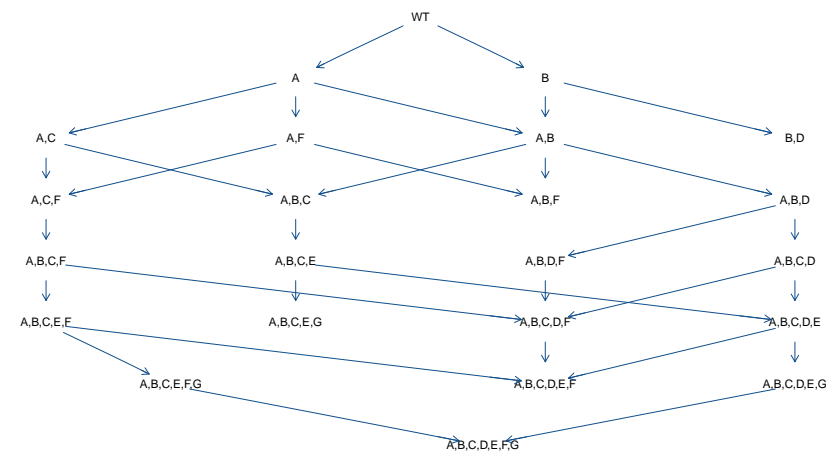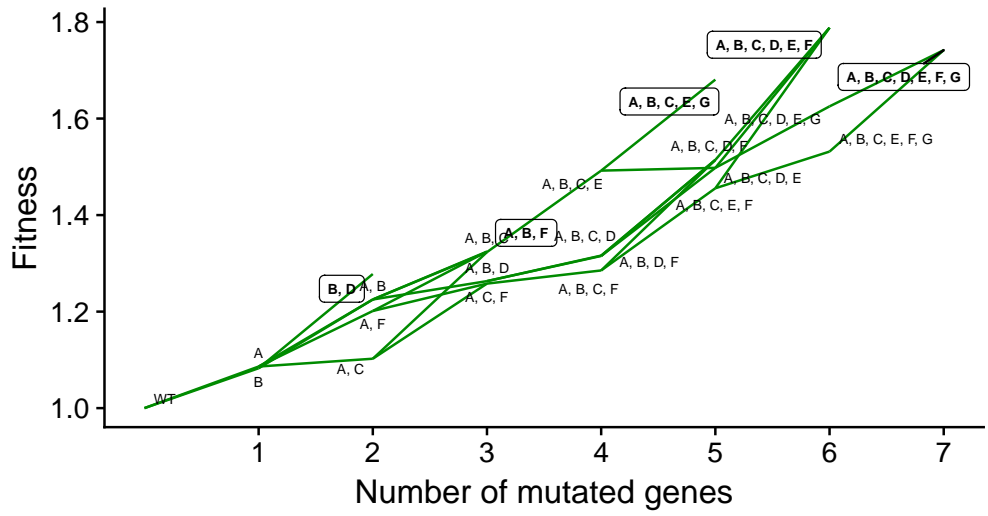

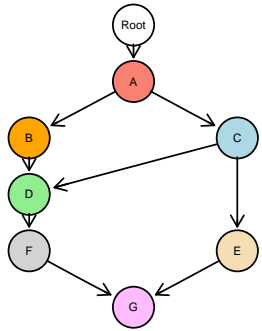

ID [nCl8mAj78ZzZKIBn](#)  
 acc genotypes 12  
 peaks no back 2  
 removed edges 1  
 prop rem edges 0.067

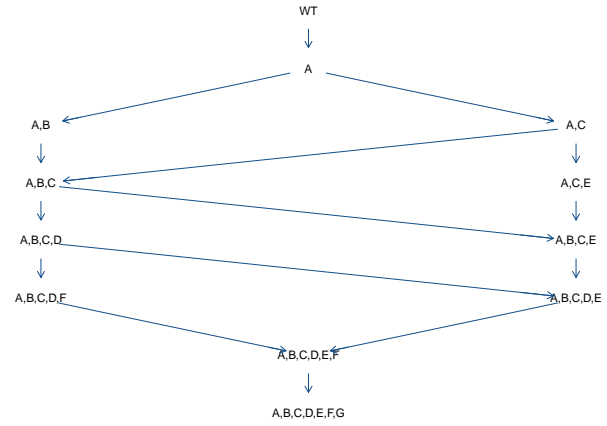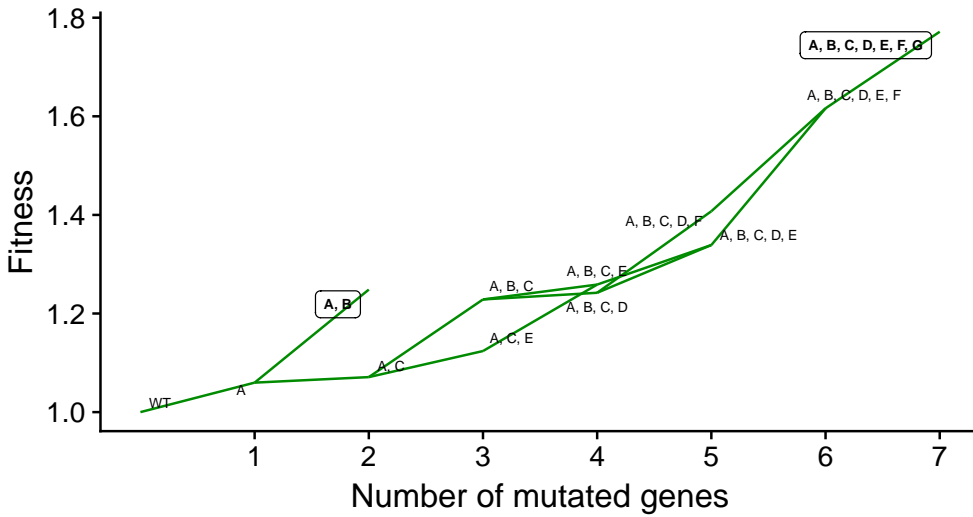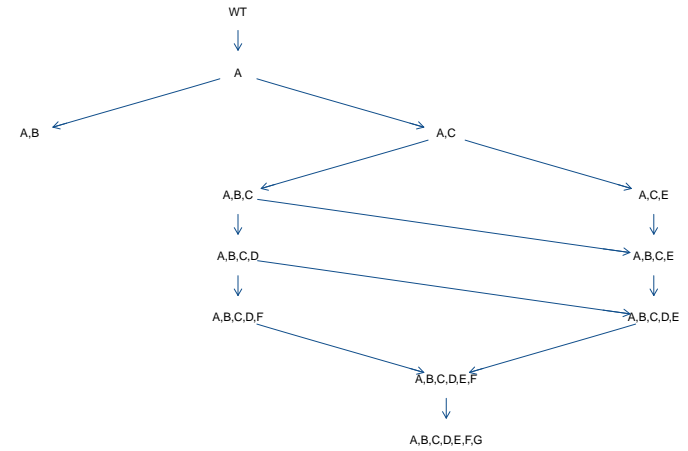



ID nKSE4LBW1z9FriV10  
 acc genotypes 13  
 peaks no back 2  
 removed edges 2  
 prop rem edges 0.111

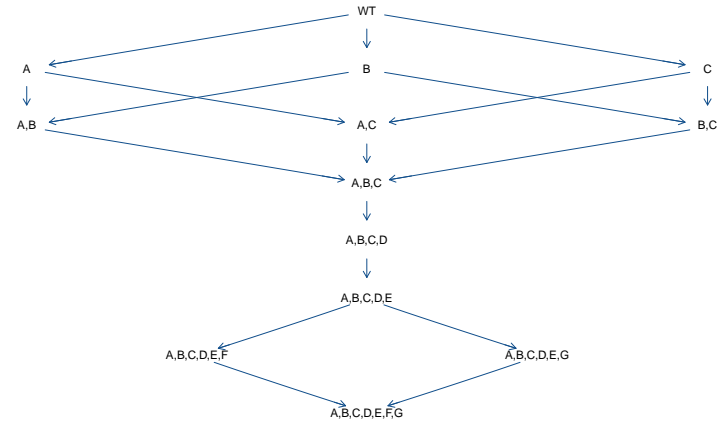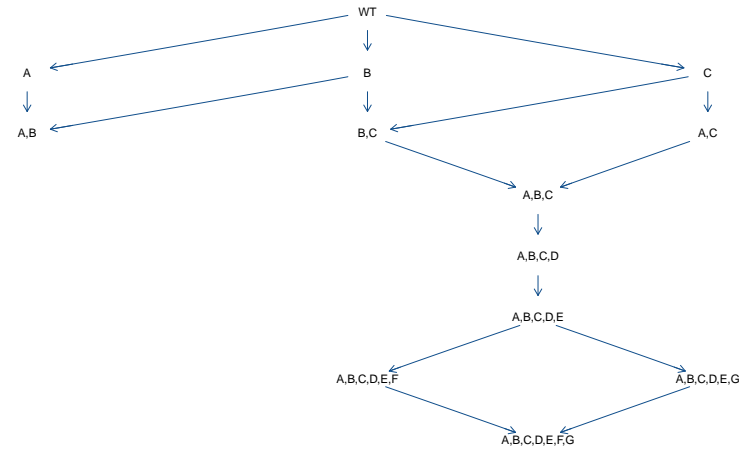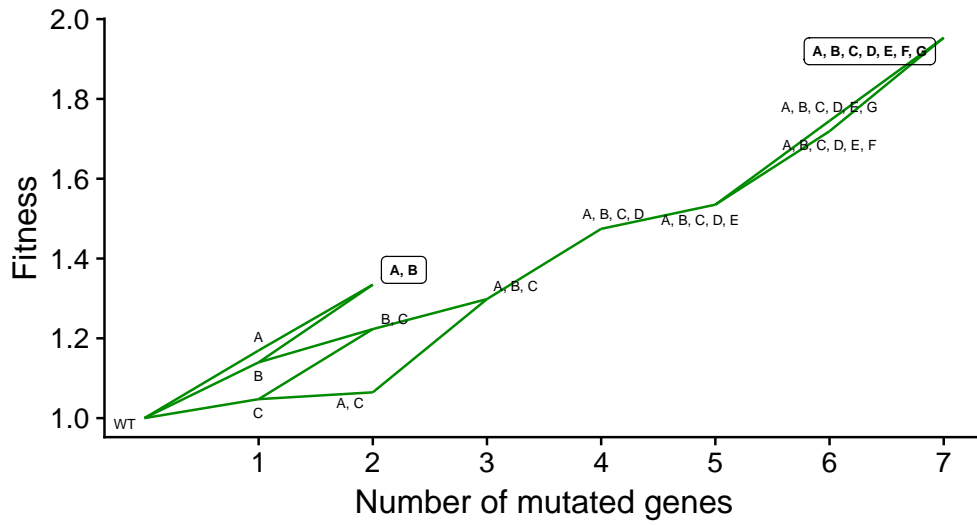



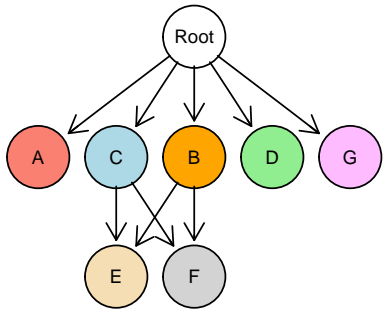

ID [nN4Nwzsq10yrsfjs7](#)  
 acc genotypes 56  
 peaks no back 7  
 removed edges 29  
 prop rem edges 0.196

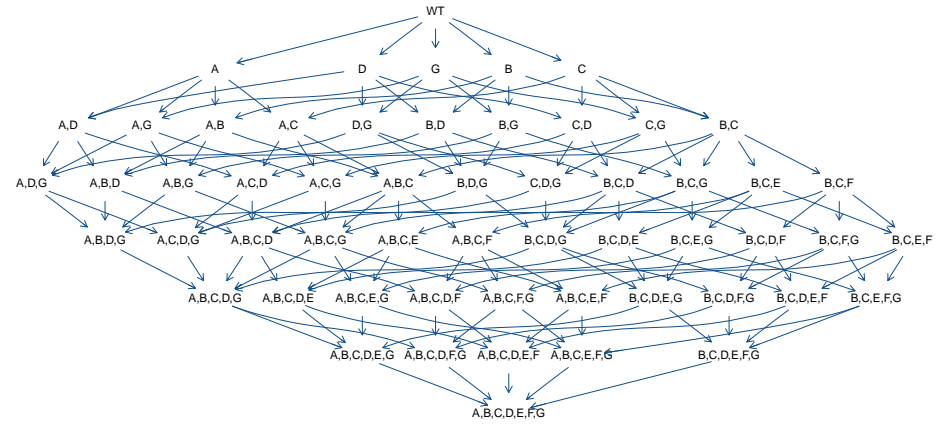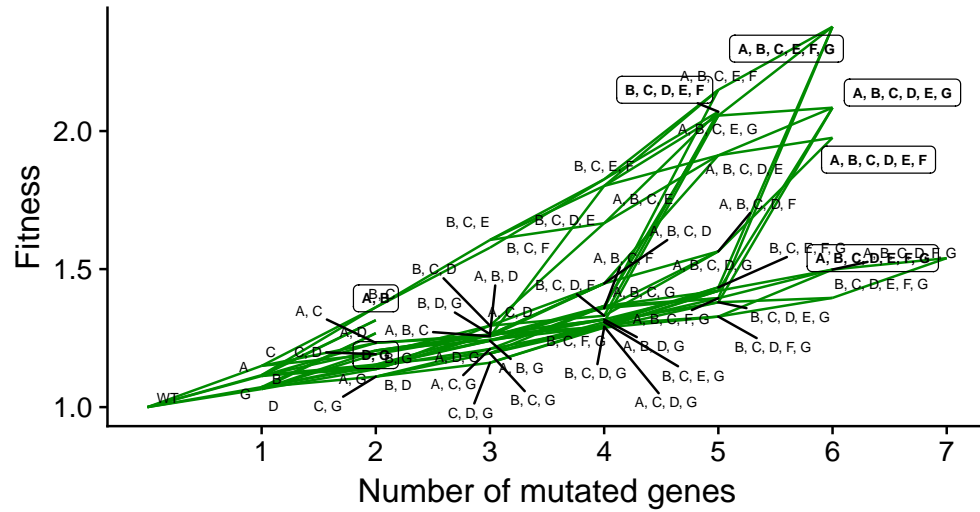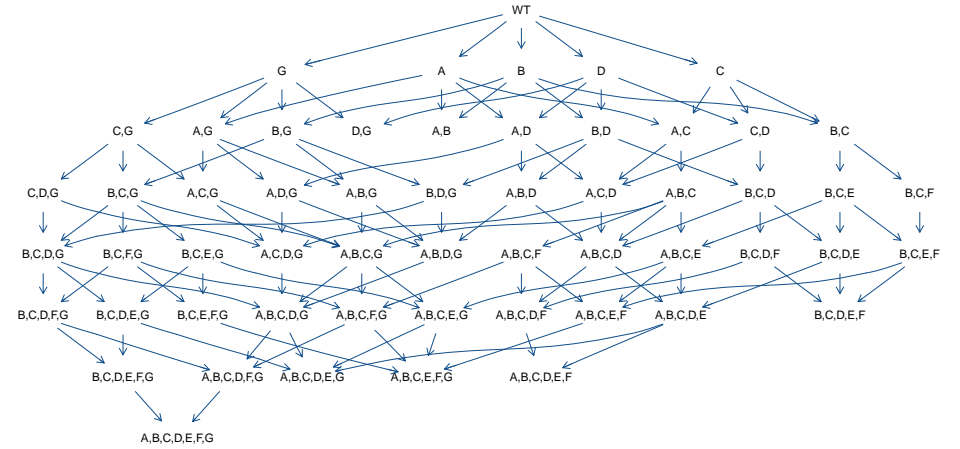

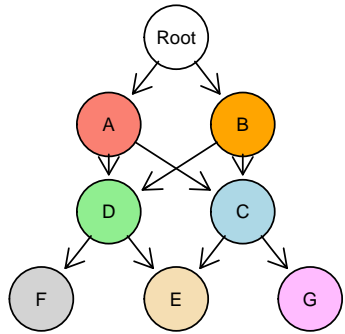

ID [NnQqInZk8XUxrSDx](#)  
 acc genotypes 16  
 peaks no back 5  
 removed edges 5  
 prop rem edges 0.208

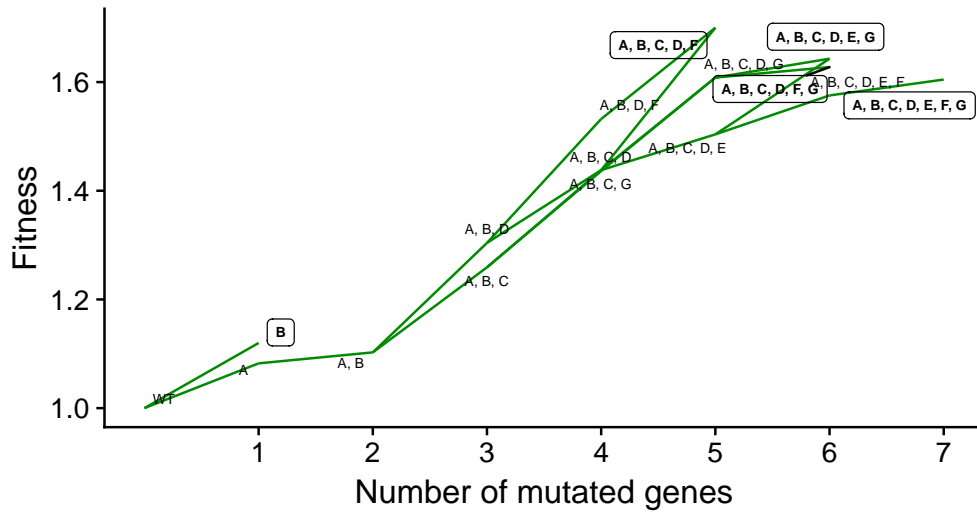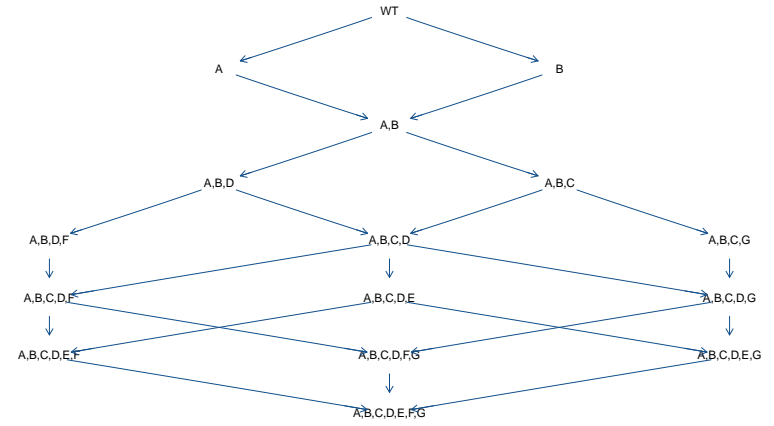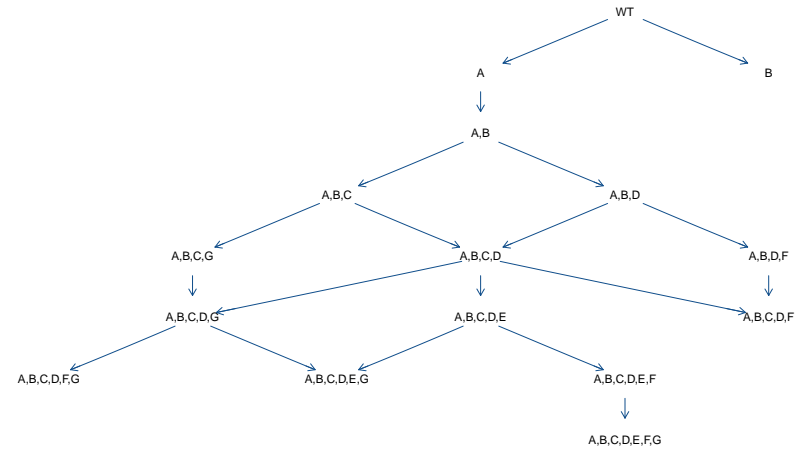

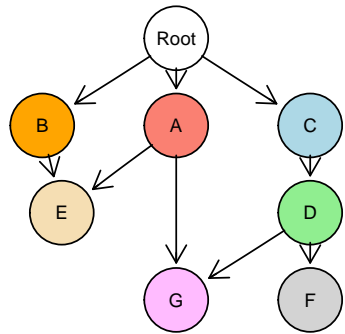

ID nX7dlkO9zvyI4JCM  
 acc genotypes 26  
 peaks no back 2  
 removed edges 5  
 prop rem edges 0.104

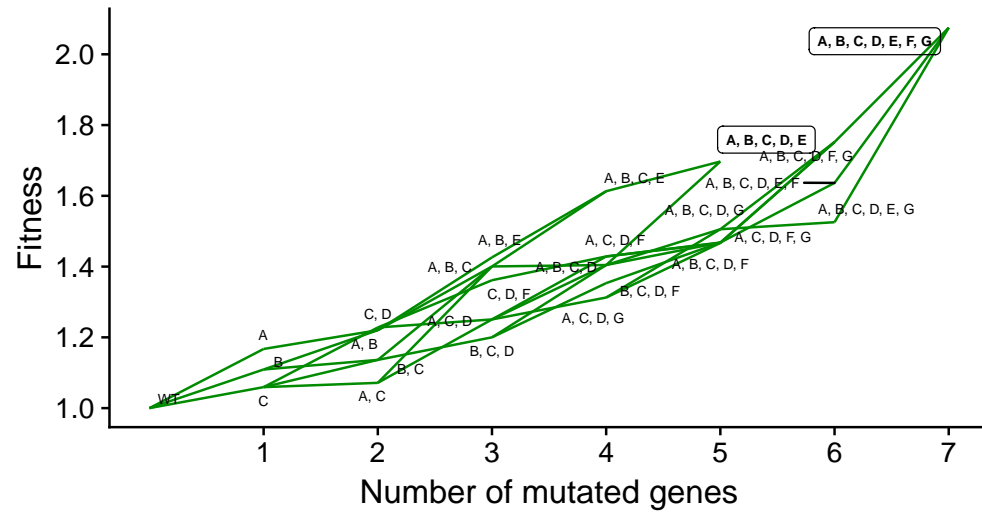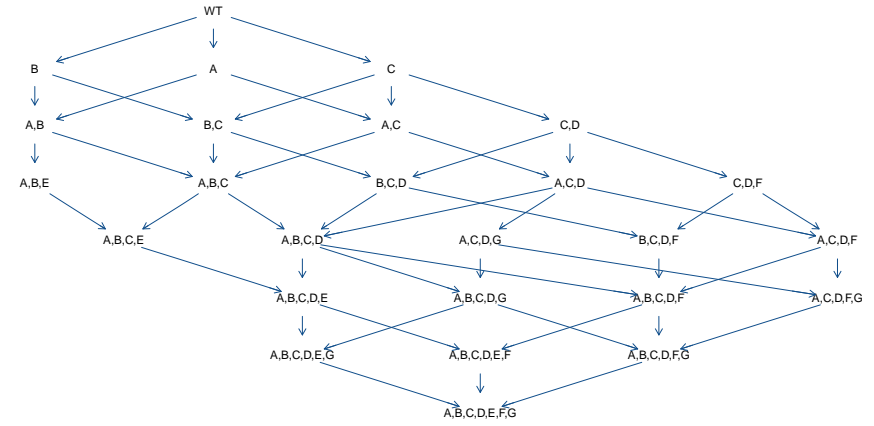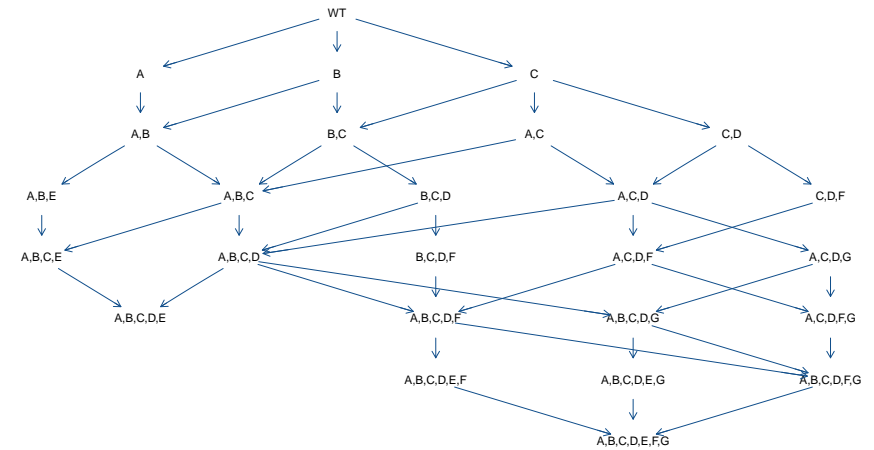

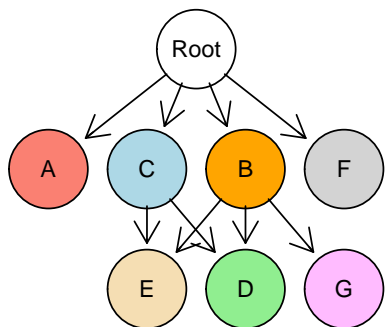

ID nYEr3NE5NcmF25mT  
 acc genotypes 48  
 peaks no back 9  
 removed edges 17  
 prop rem edges 0.142

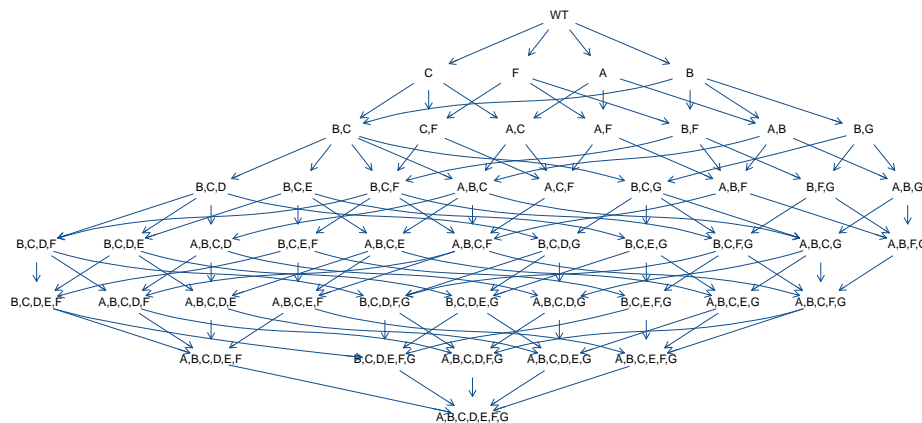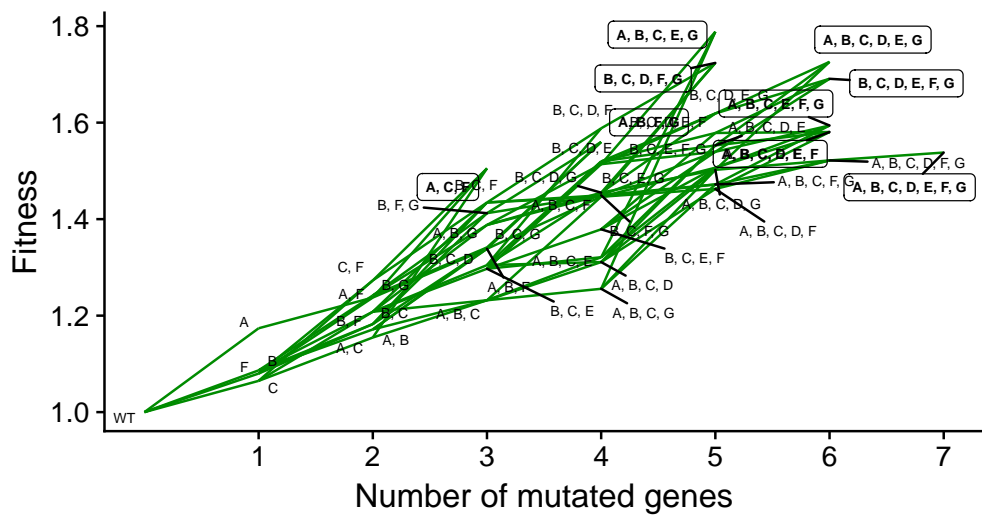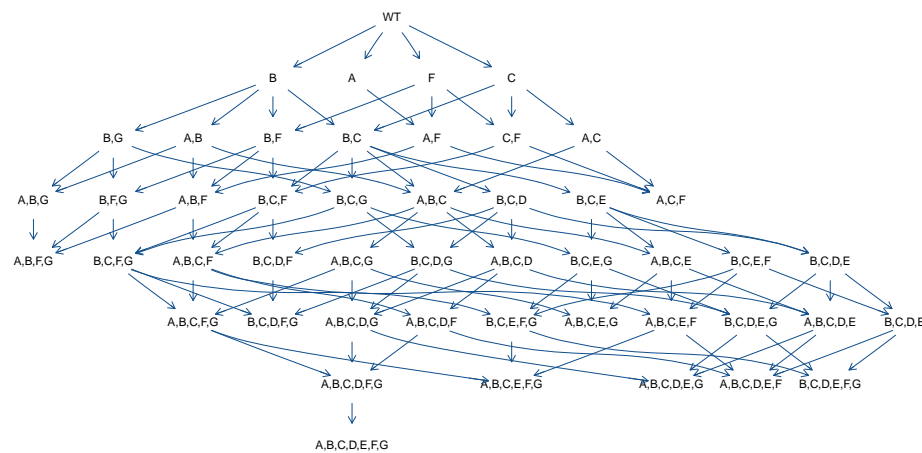

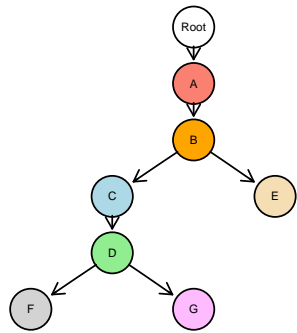

ID o4Y3hPxIjQmaWRx1  
 acc genotypes 14  
 peaks no back 2  
 removed edges 1  
 prop rem edges 0.05

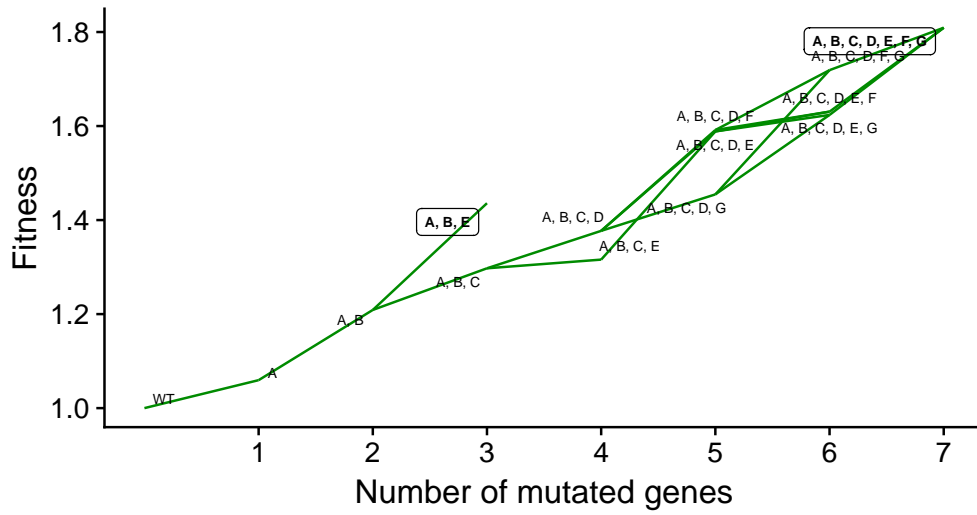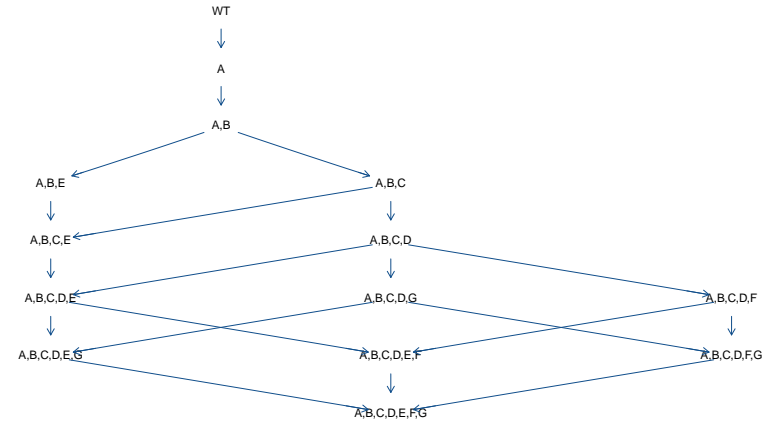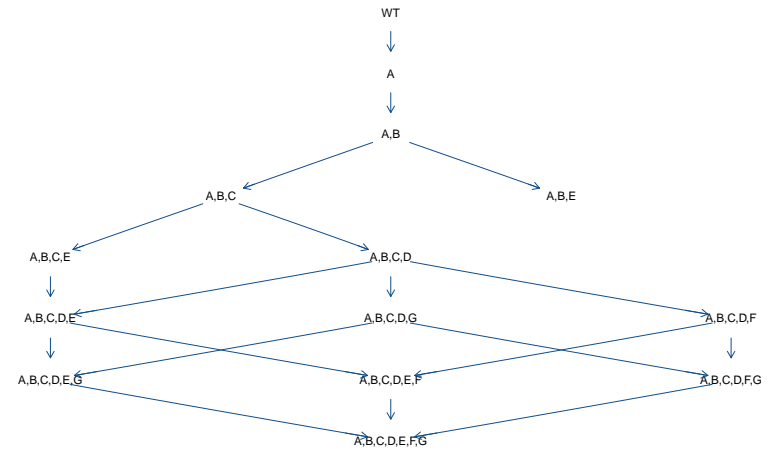

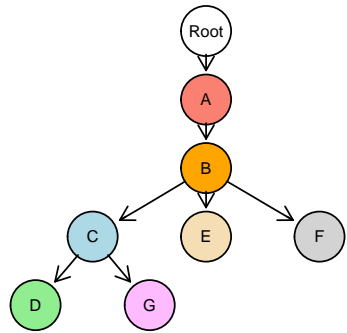

ID **OaMMWW2waVOxtGK3**  
 acc genotypes **22**  
 peaks no back **5**  
 removed edges **5**  
 prop rem edges **0.119**

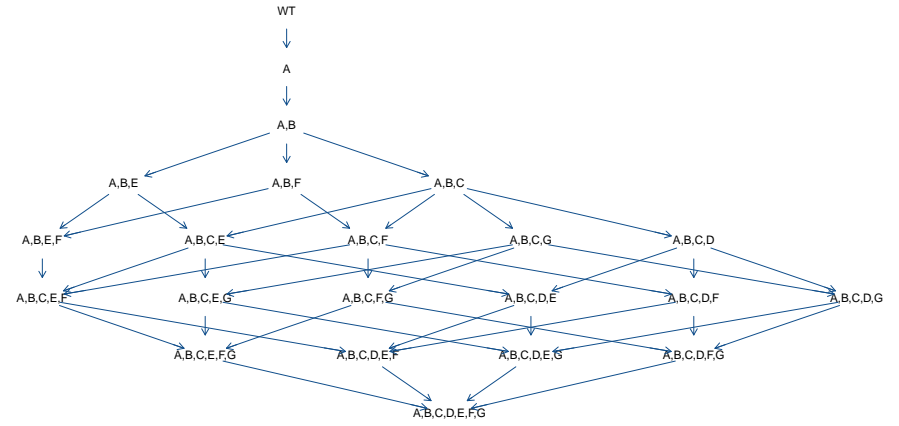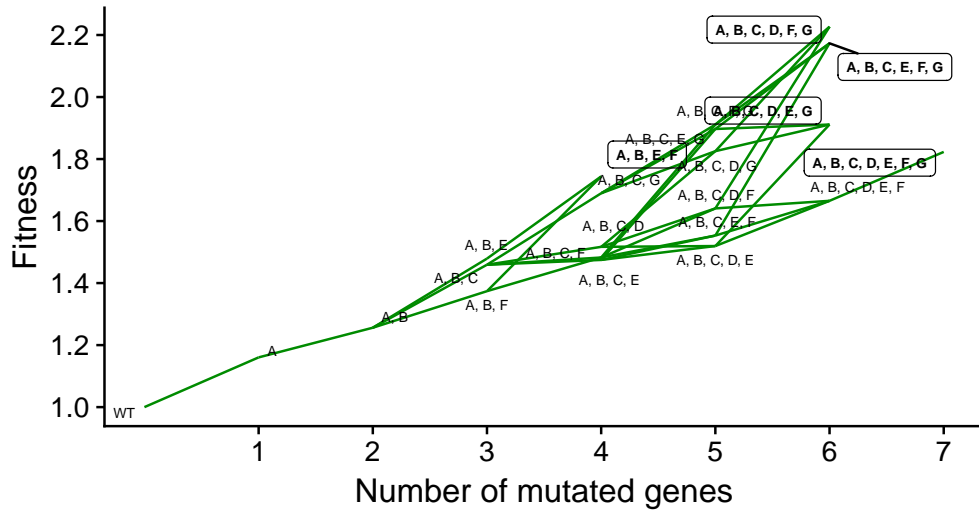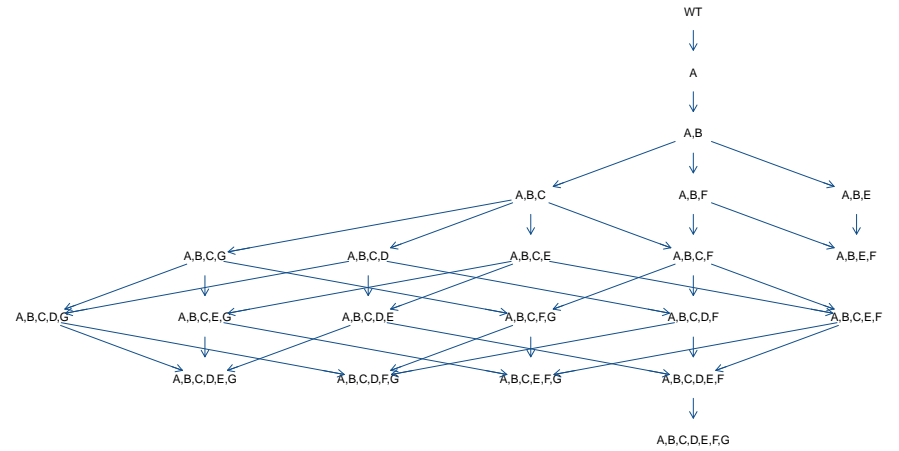

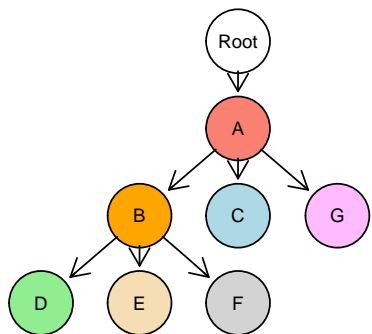

ID ODbE43XDGuHvXueq  
 acc genotypes 37  
 peaks no back 3  
 removed edges 6  
 prop rem edges 0.067

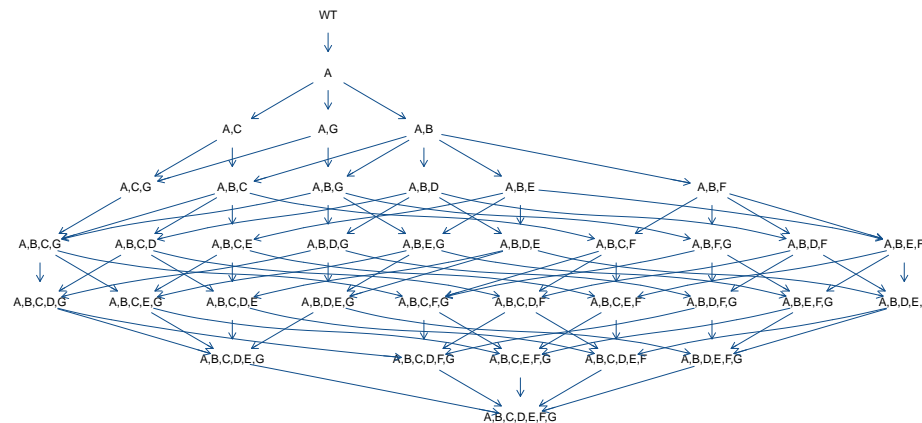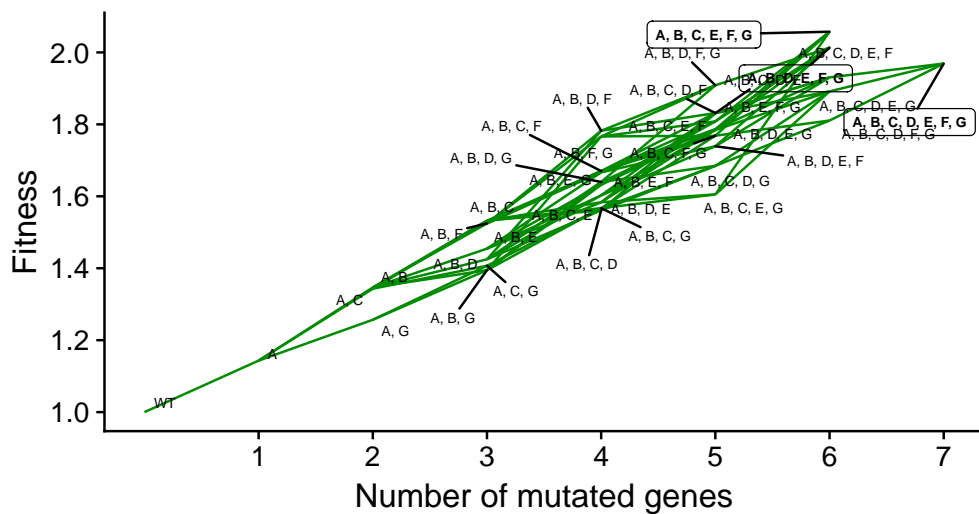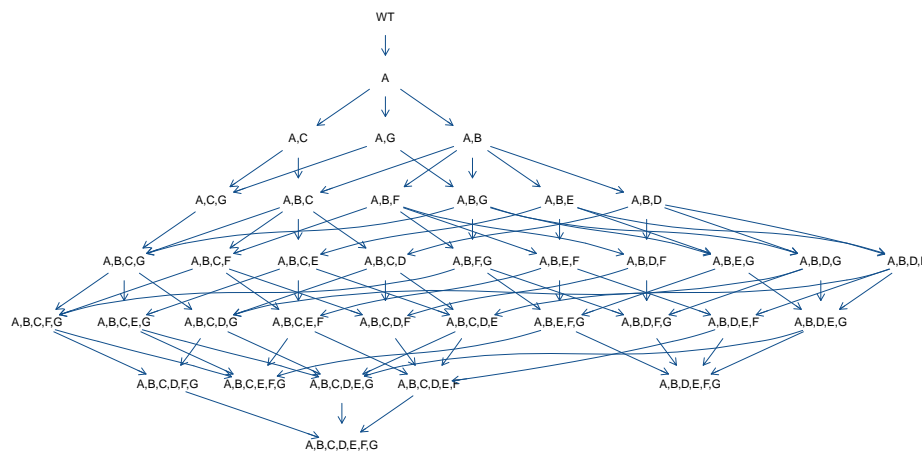





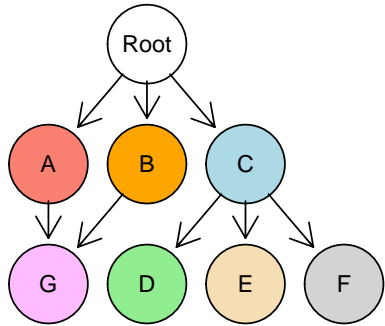

ID **OMDWvgSAoX1WSQy1**  
 acc genotypes **45**  
 peaks no back **3**  
 removed edges **13**  
 prop rem edges **0.118**

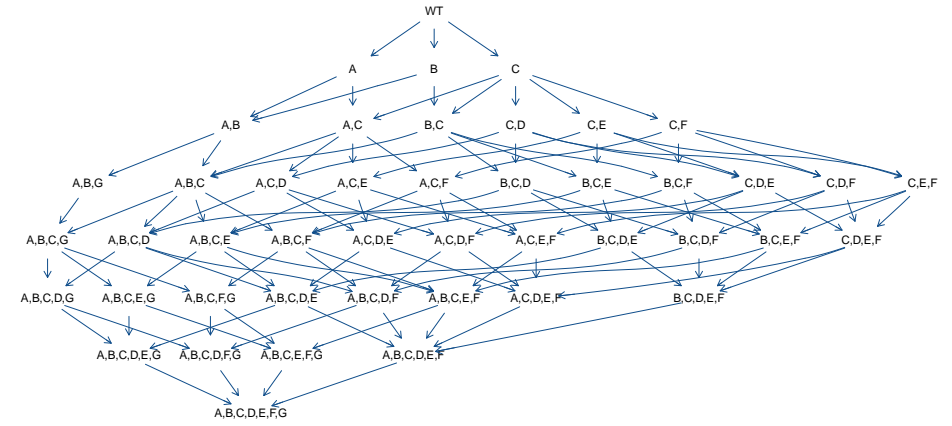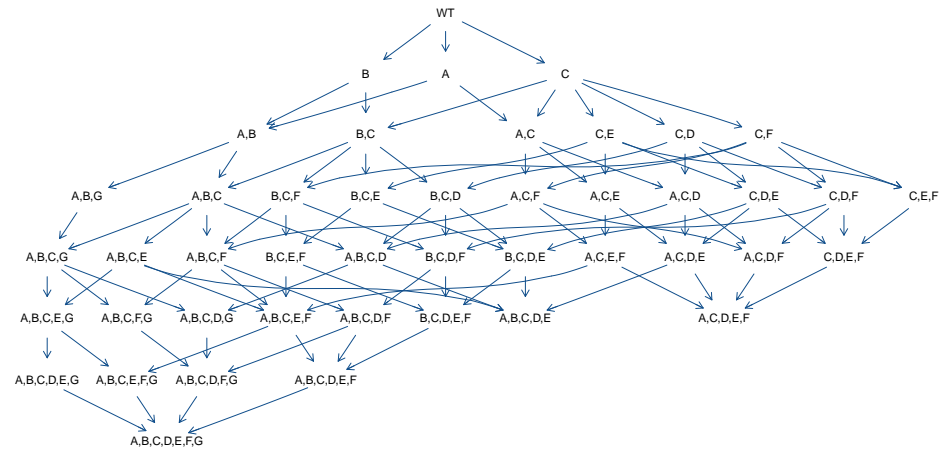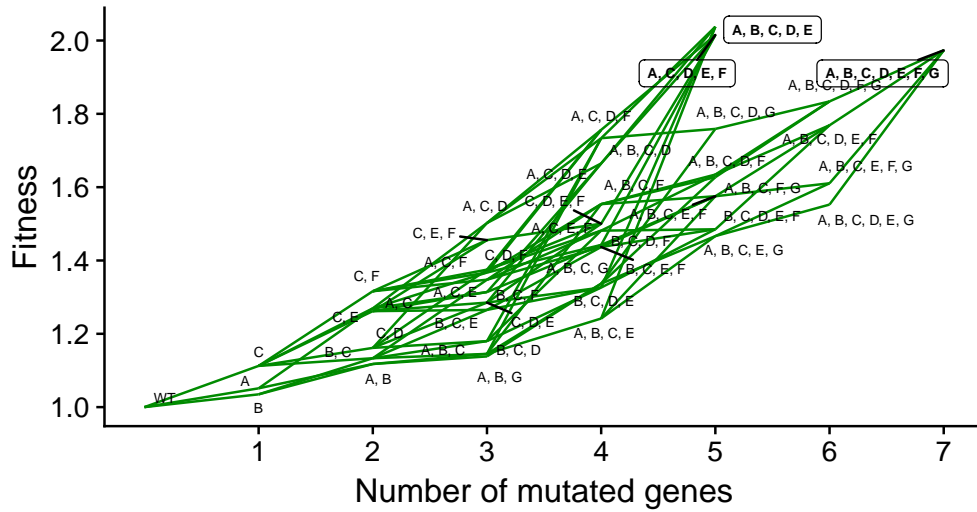

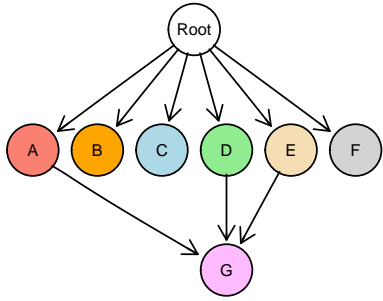

ID **OWPmZOSW53BSDQD7**  
 acc genotypes **72**  
 peaks no back **9**  
 removed edges **44**  
 prop rem edges **0.208**

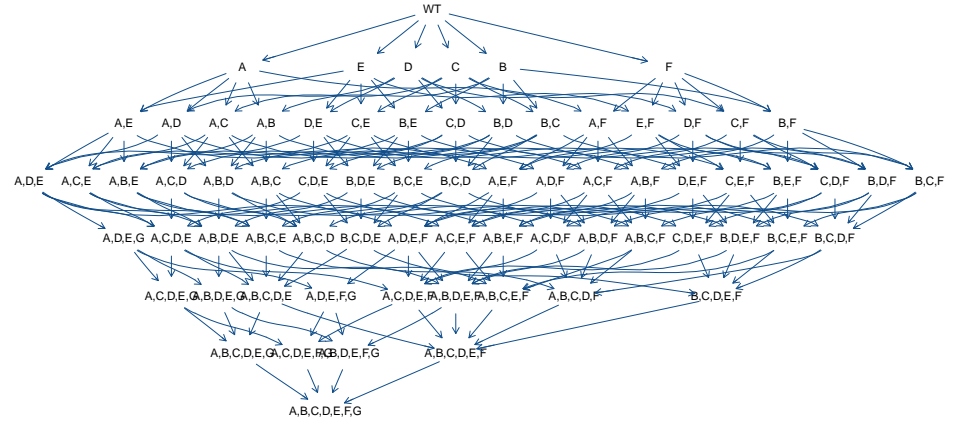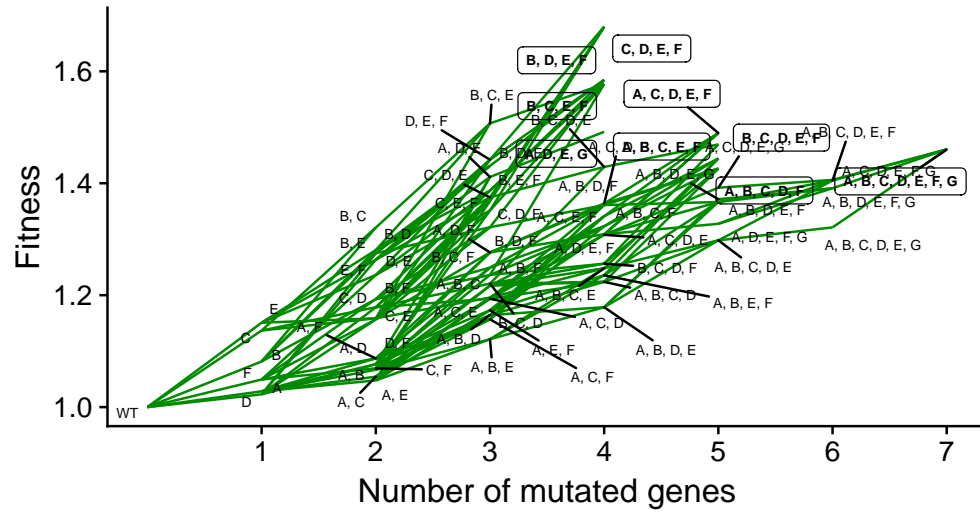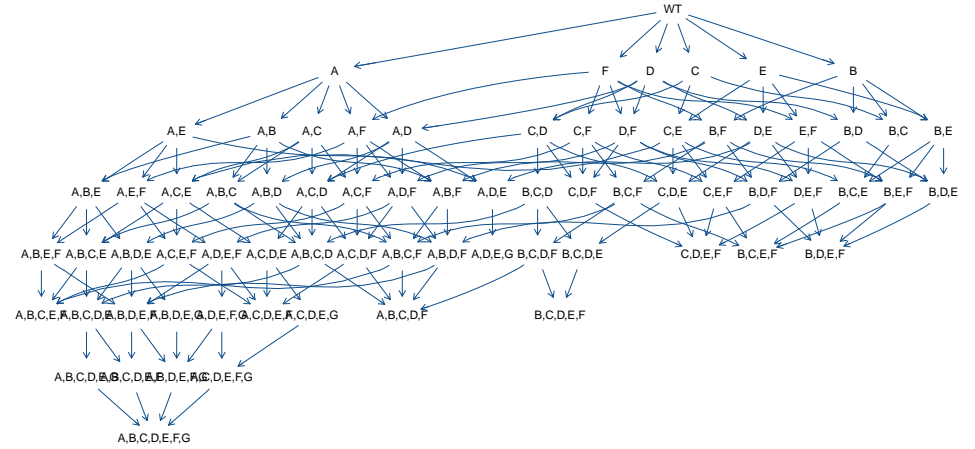

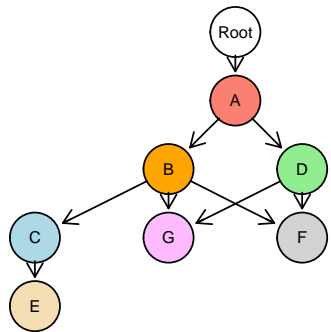

ID **OyMB3UqWrH3e9QQY**  
 acc genotypes **18**  
 peaks no back **4**  
 removed edges **3**  
 prop rem edges **0.103**

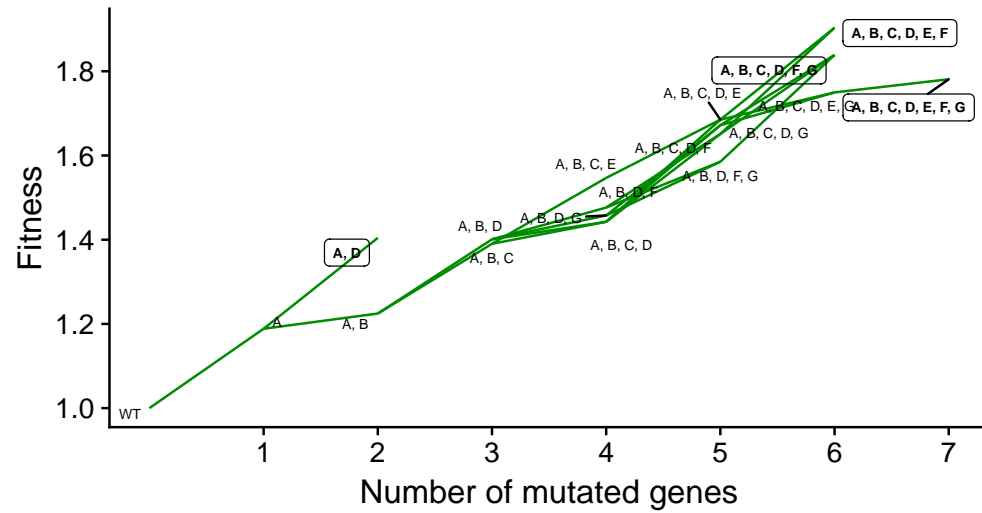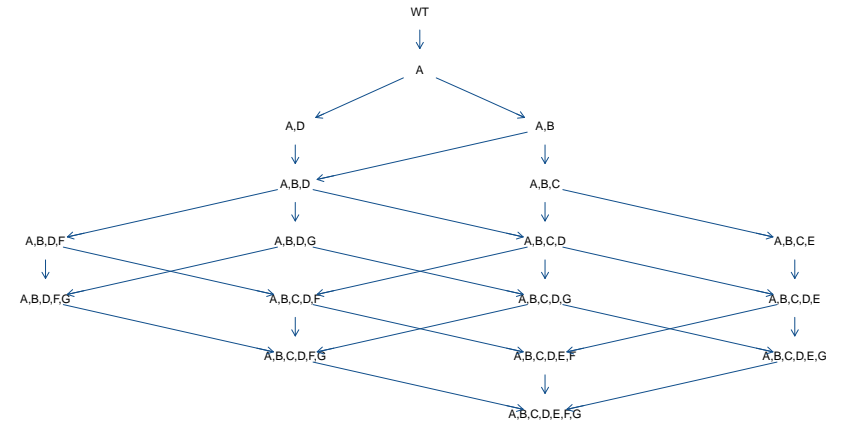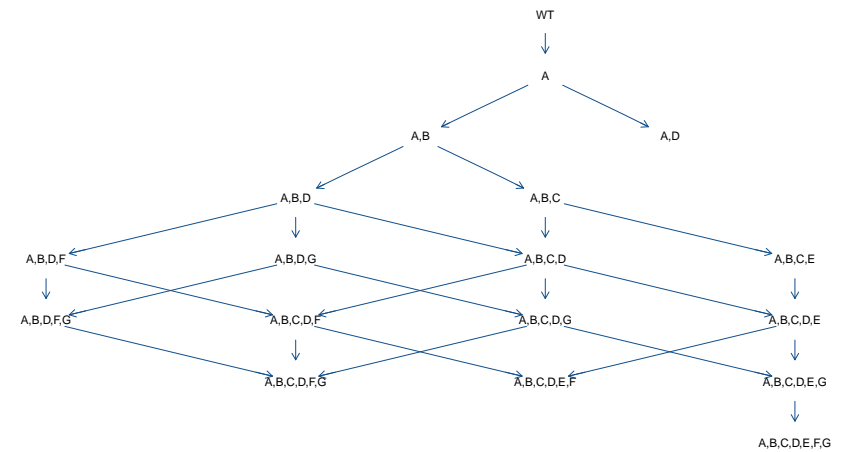

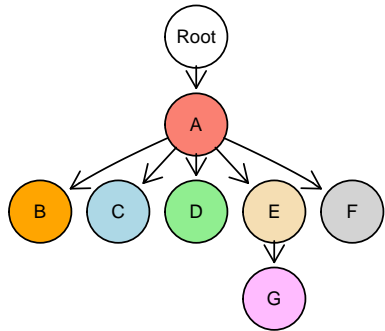

ID PKsB3Byp3SIOQBQf  
 acc genotypes 49  
 peaks no back 7  
 removed edges 20  
 prop rem edges 0.155

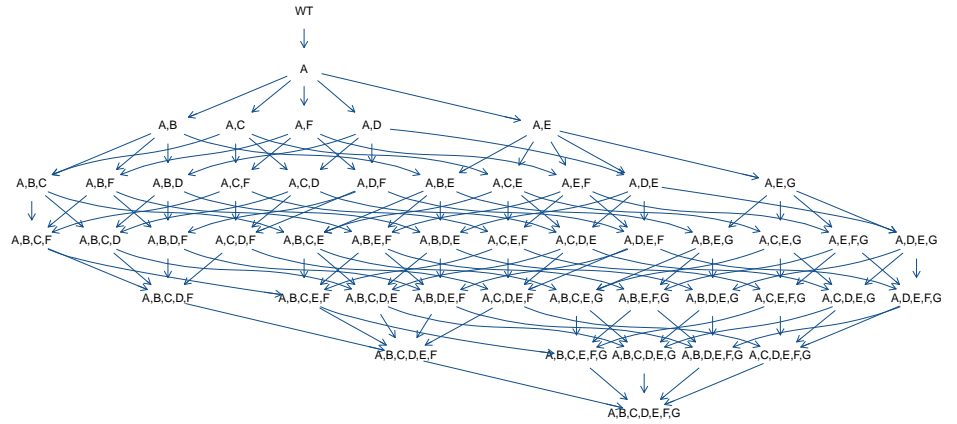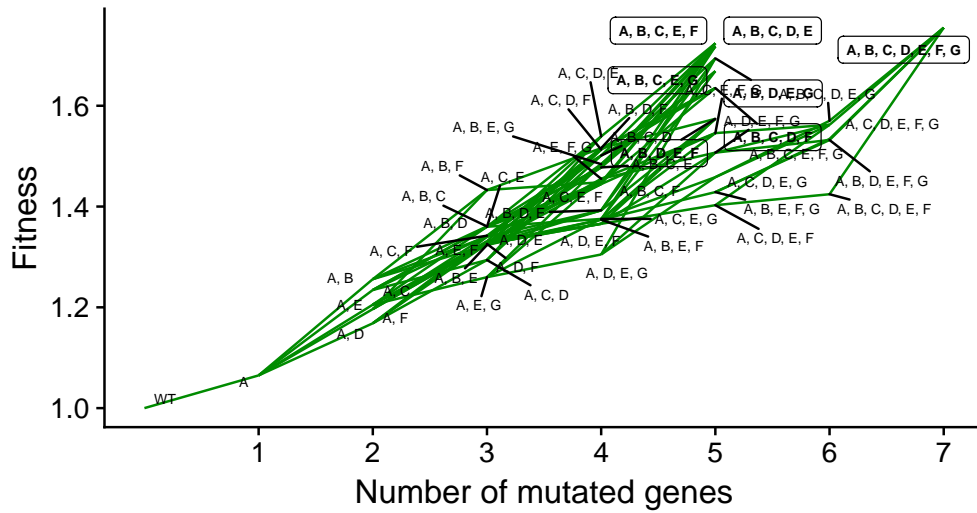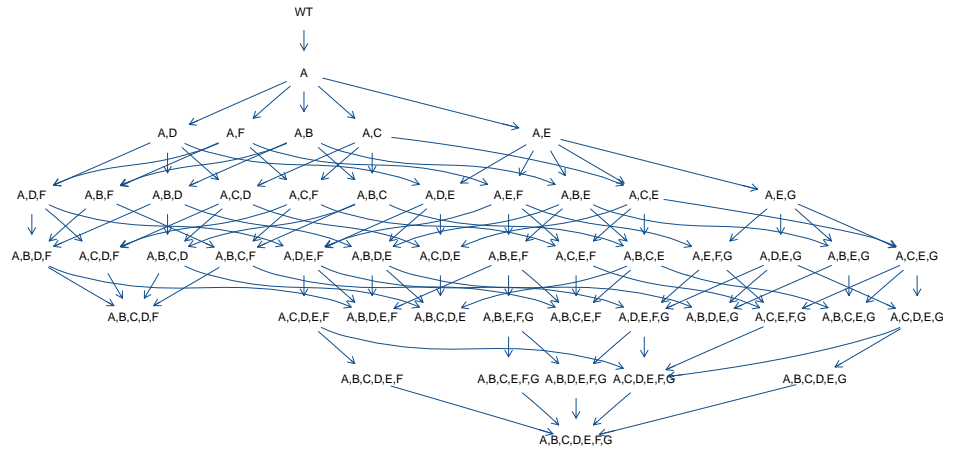

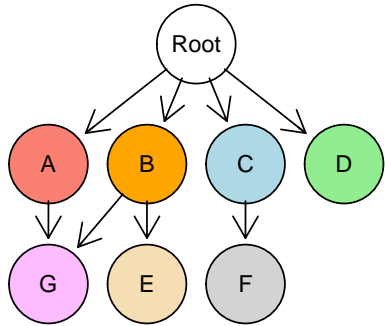

ID pP2pcse7FrkoEWZp  
 acc genotypes 48  
 peaks no back 6  
 removed edges 20  
 prop rem edges 0.172

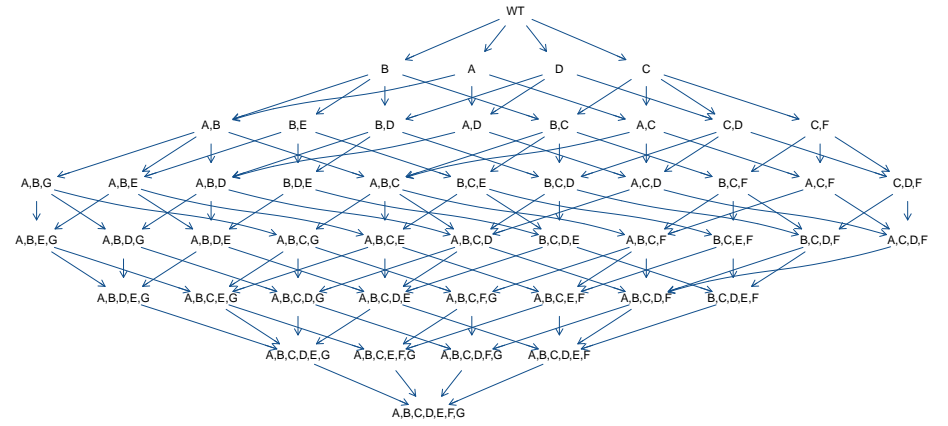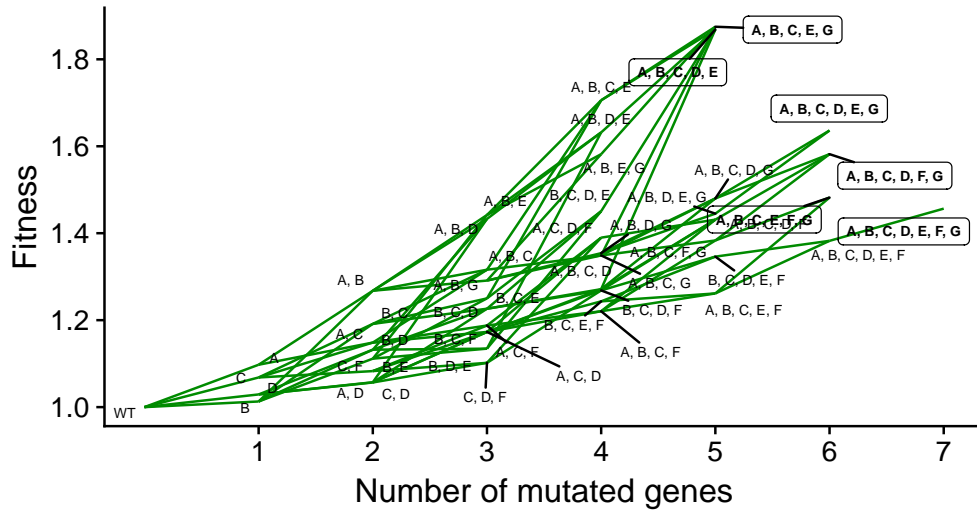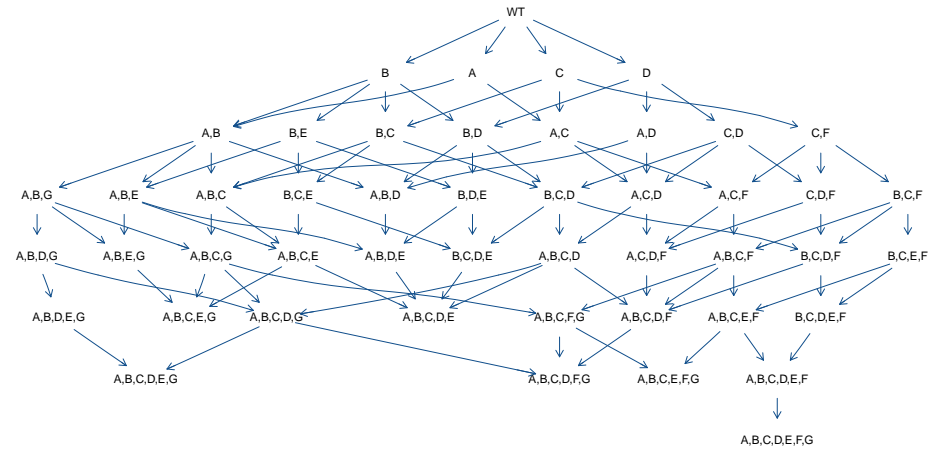

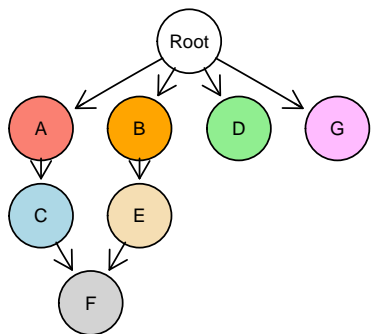

ID PPVpOC9kPI3xygTj  
 acc genotypes 40  
 peaks no back 8  
 removed edges 19  
 prop rem edges 0.207

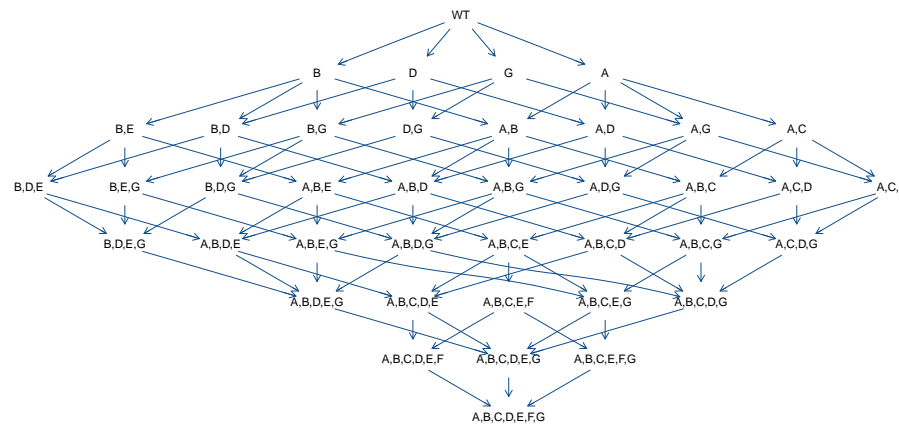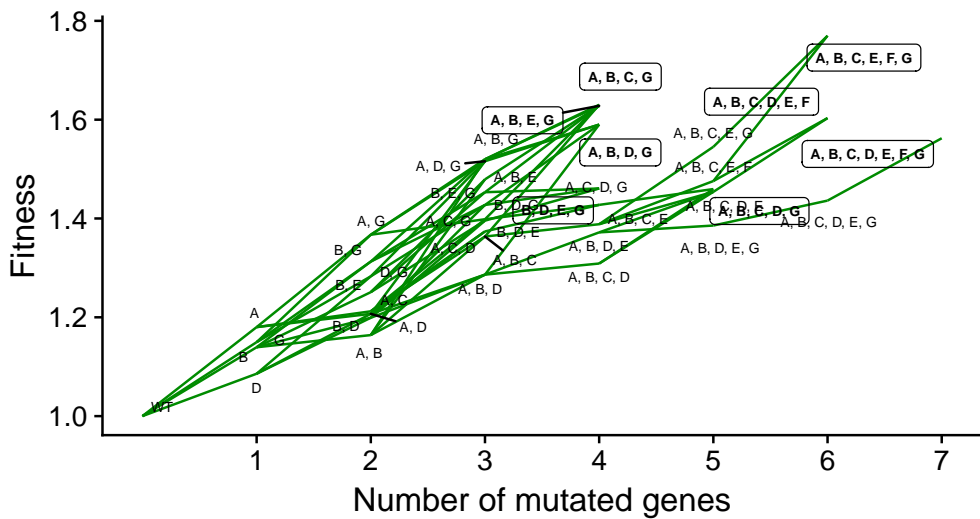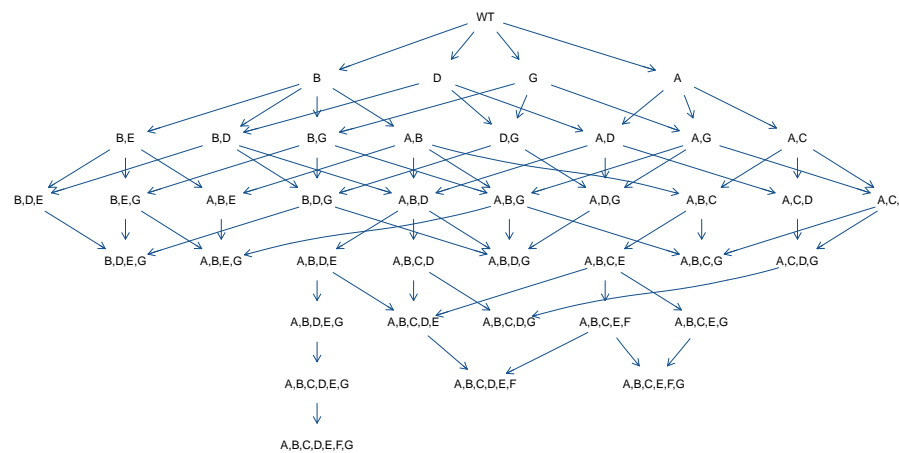

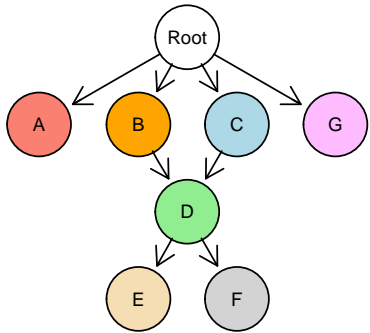

ID pSBATEcePfnX7JWh  
 acc genotypes 32  
 peaks no back 2  
 removed edges 7  
 prop rem edges 0.103

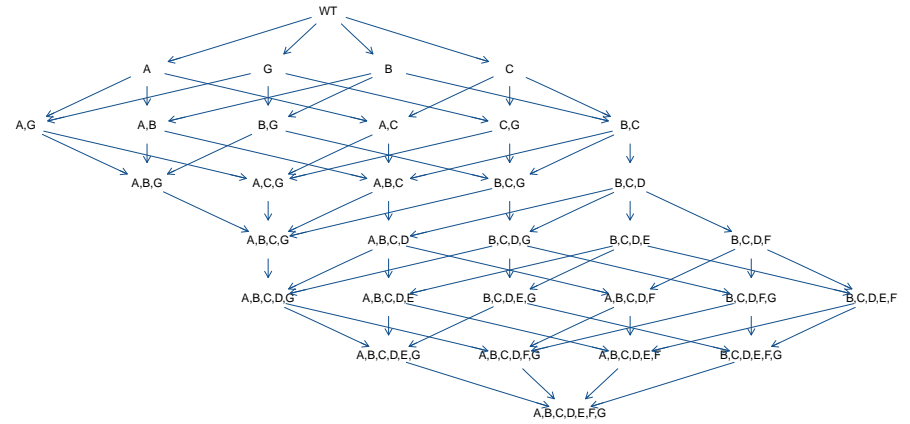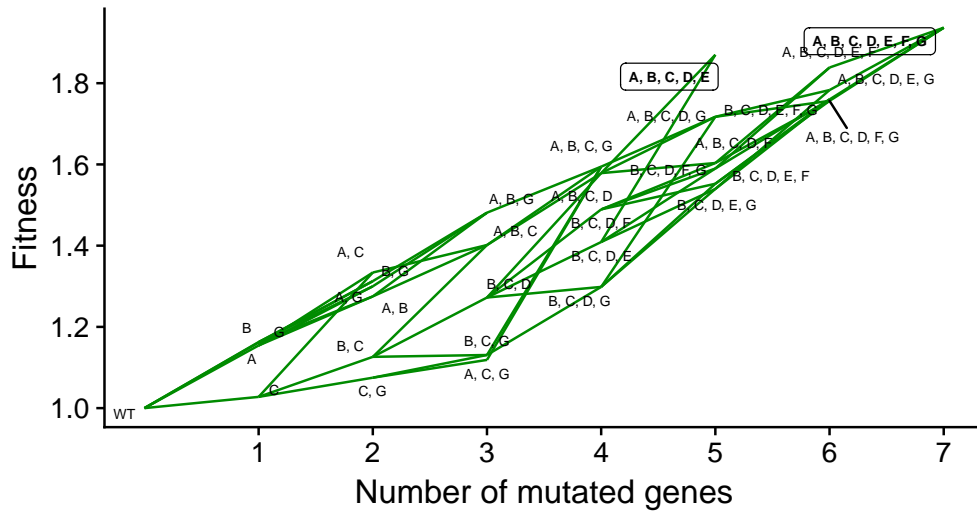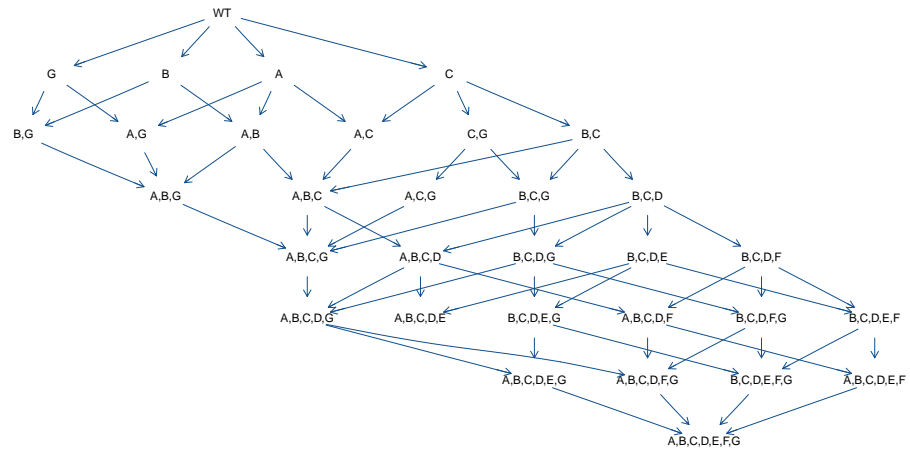

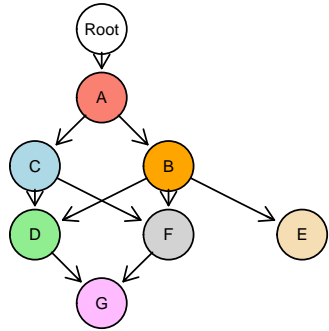

ID **pui6npZKf4iG9VmR**  
 acc genotypes **15**  
 peaks no back **3**  
 removed edges **3**  
 prop rem edges **0.136**

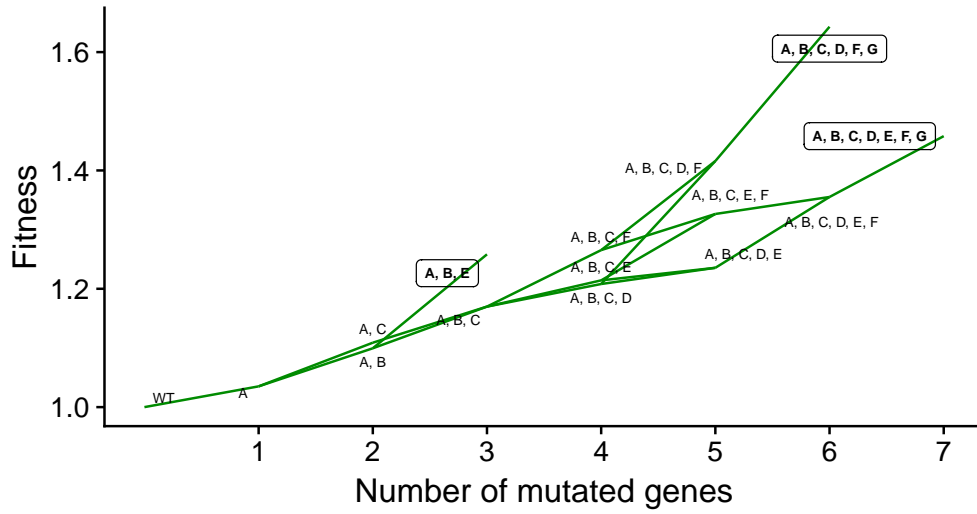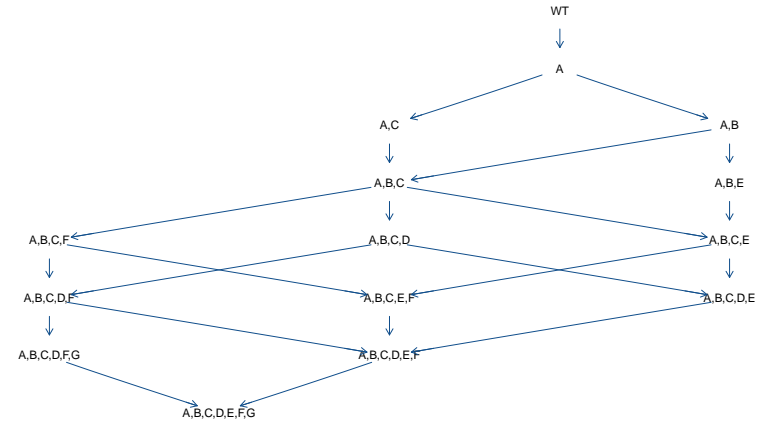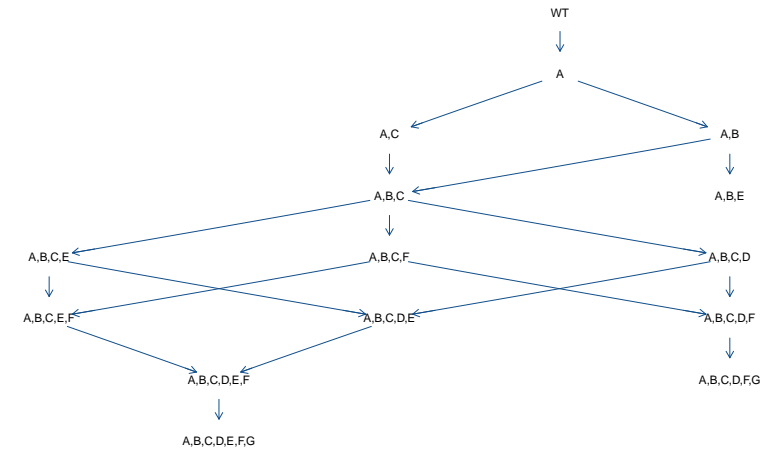



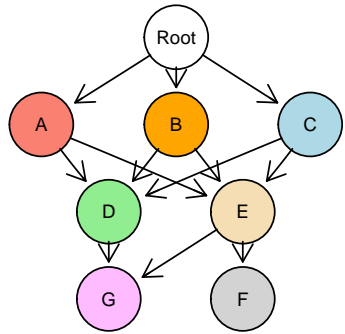

ID **Q7PLBKdNNwZTd7om**  
 acc genotypes **15**  
 peaks no back **2**  
 removed edges **2**  
 prop rem edges **0.091**

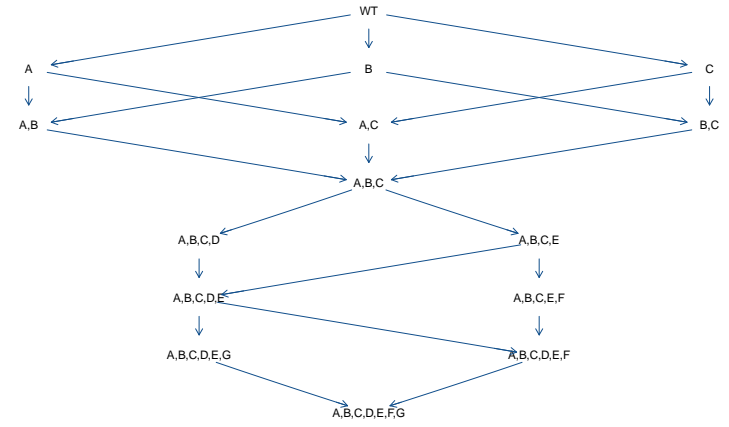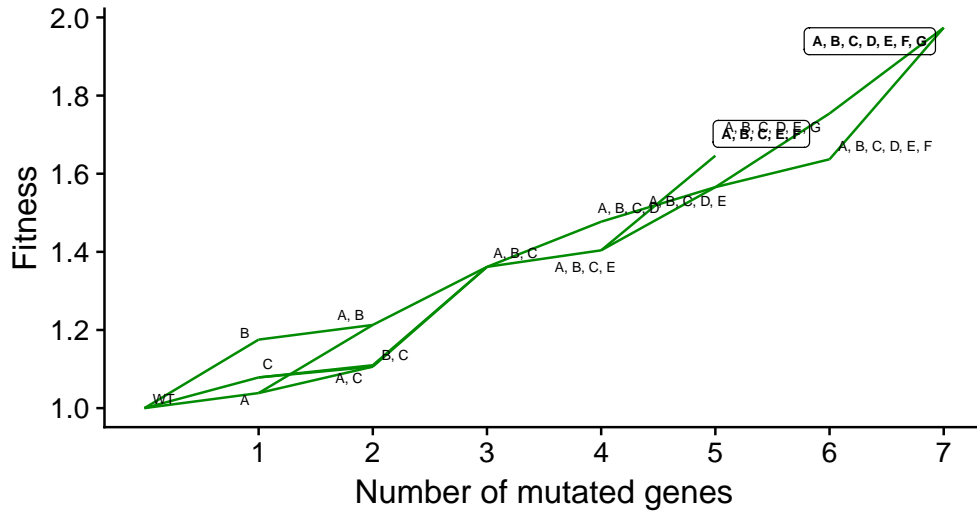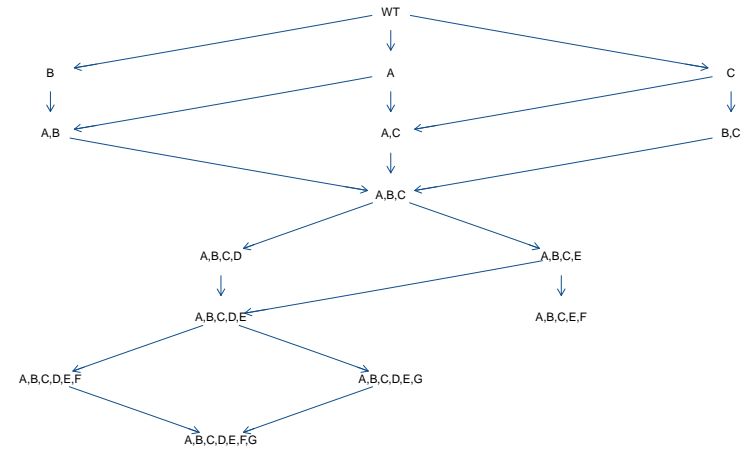

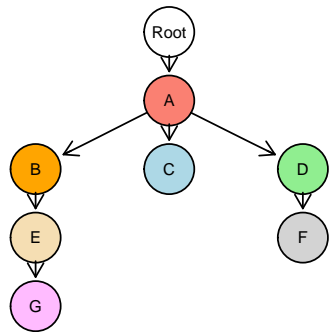

ID qEpRgGAzFDfL2rE5  
 acc genotypes 25  
 peaks no back 3  
 removed edges 10  
 prop rem edges 0.213

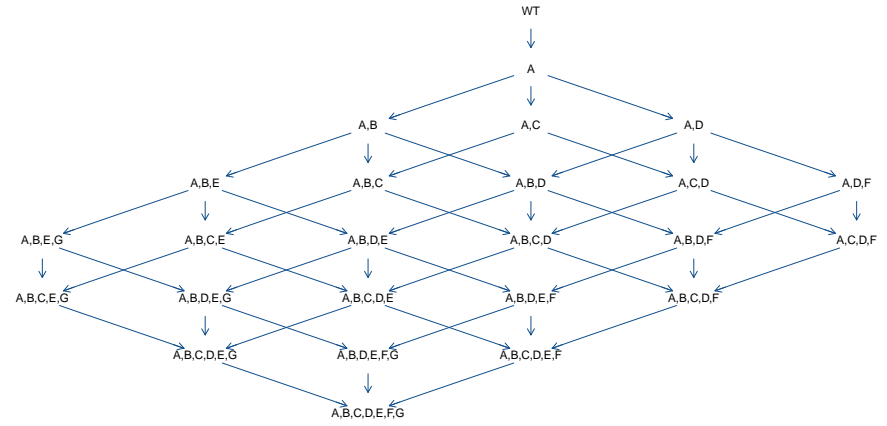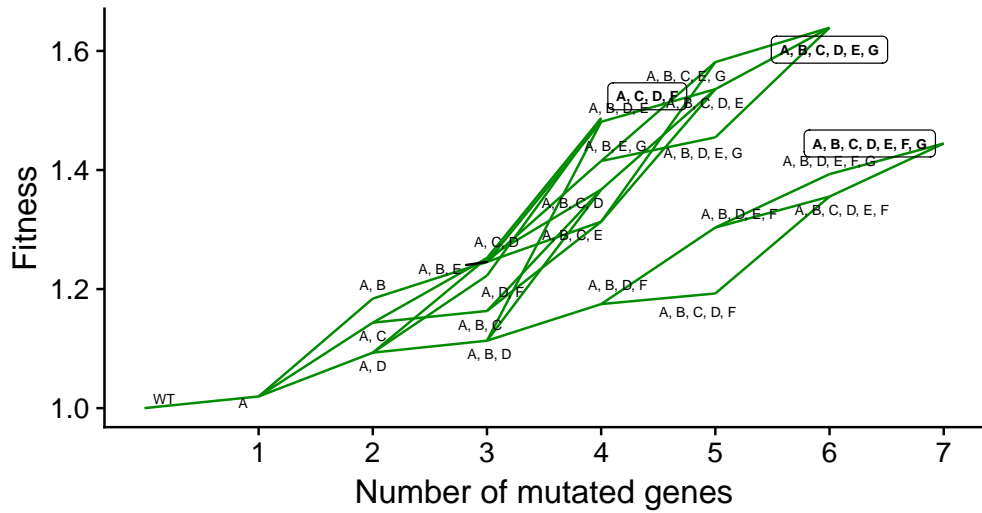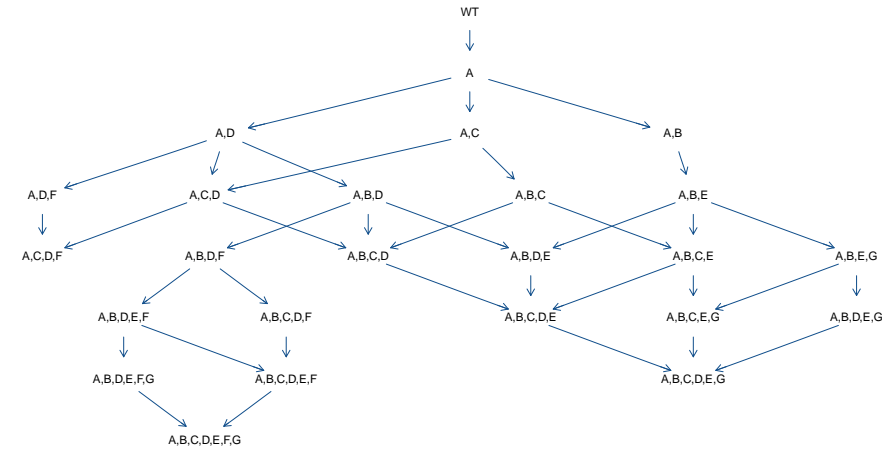

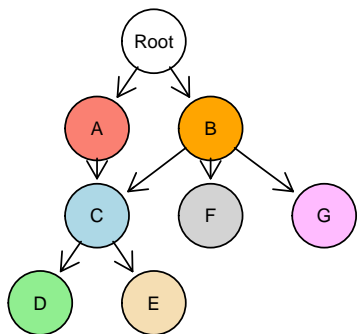

ID **qEvXADpjSKIVHQcX**  
 acc genotypes **26**  
 peaks no back **2**  
 removed edges **4**  
 prop rem edges **0.078**

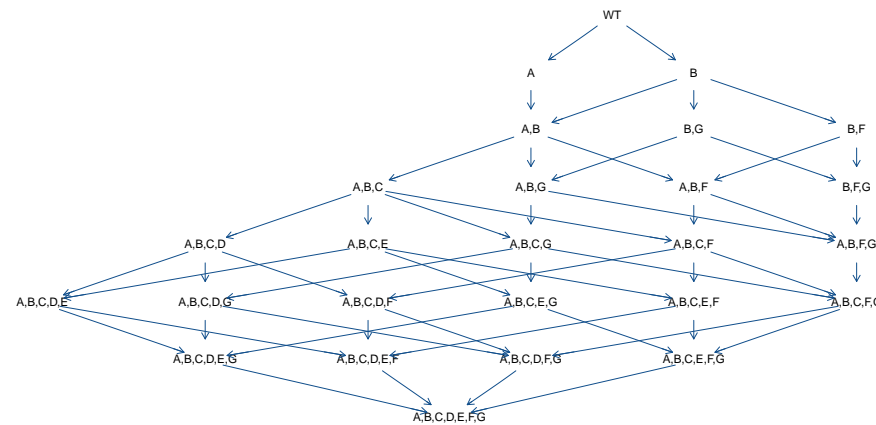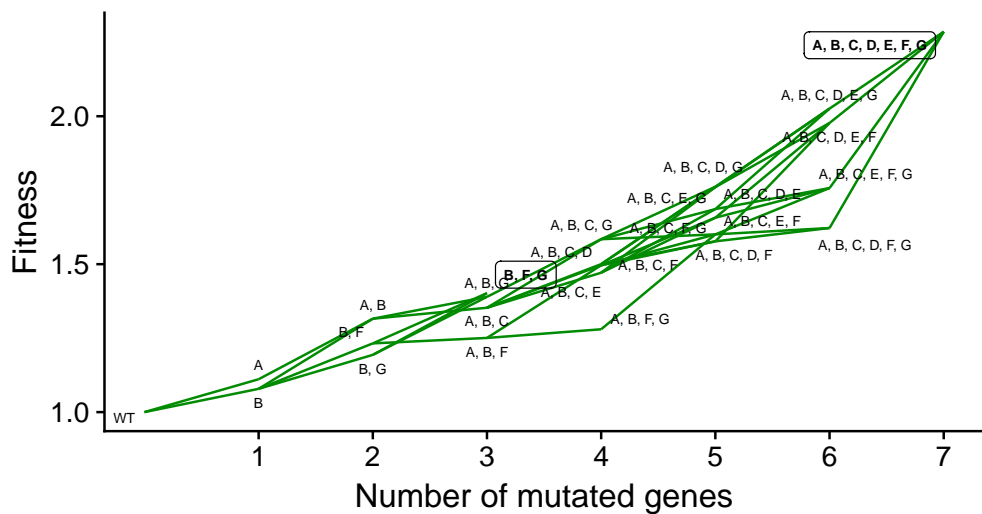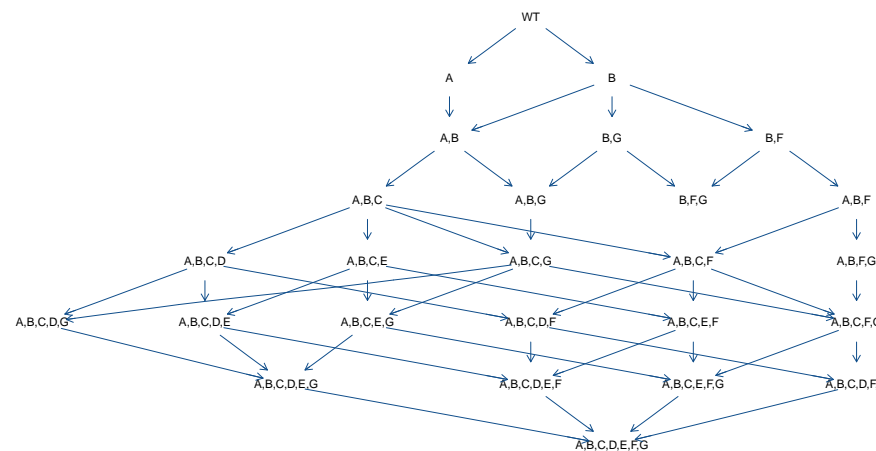

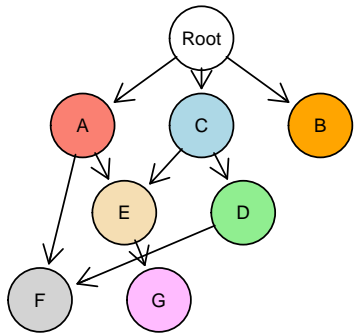

ID [qp7i3jRVfJ15Ghst](#)  
 acc genotypes 26  
 peaks no back 6  
 removed edges 12  
 prop rem edges 0.245

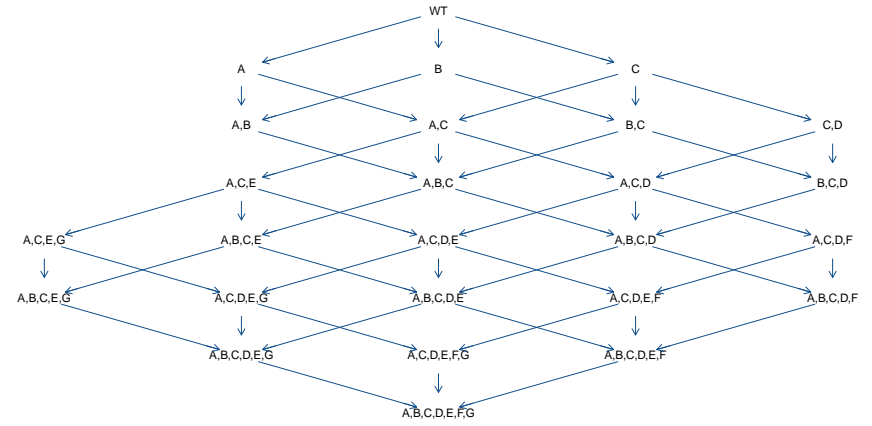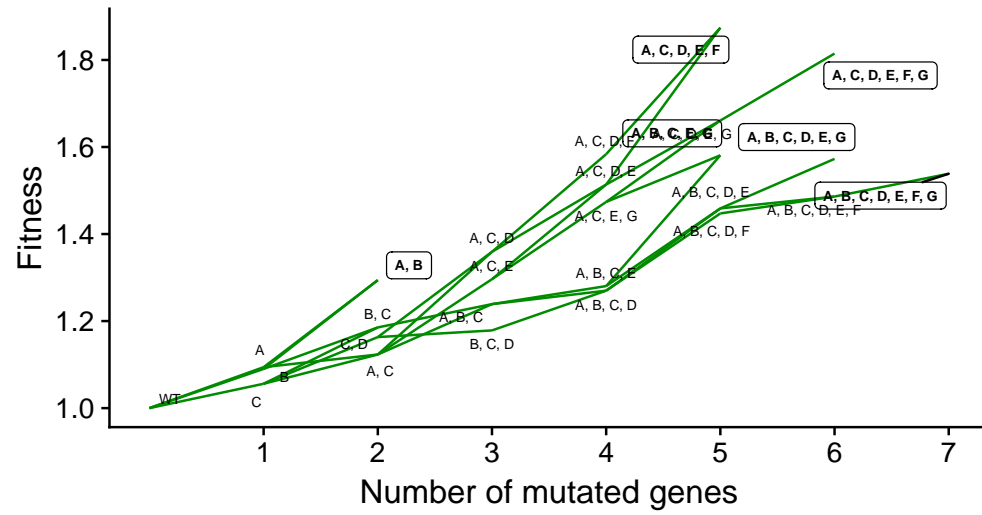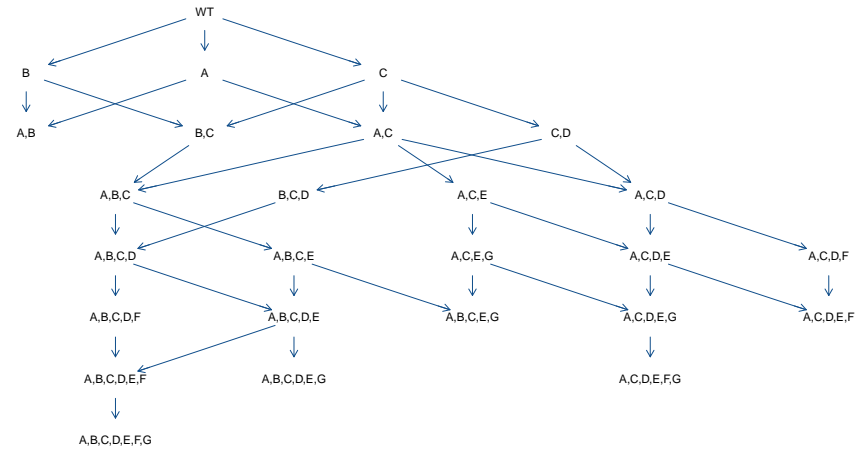

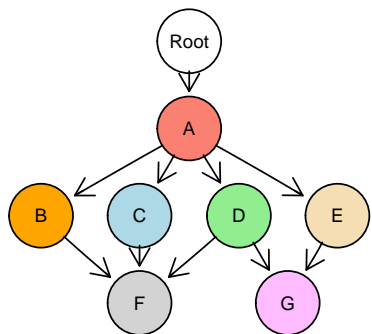

ID [QqSOOn7ihVdtBpuj](#)  
 acc genotypes 24  
 peaks no back 4  
 removed edges 4  
 prop rem edges 0.087

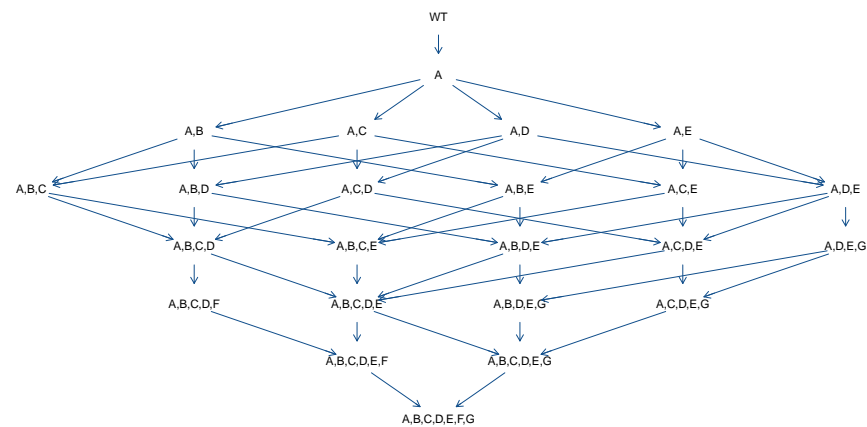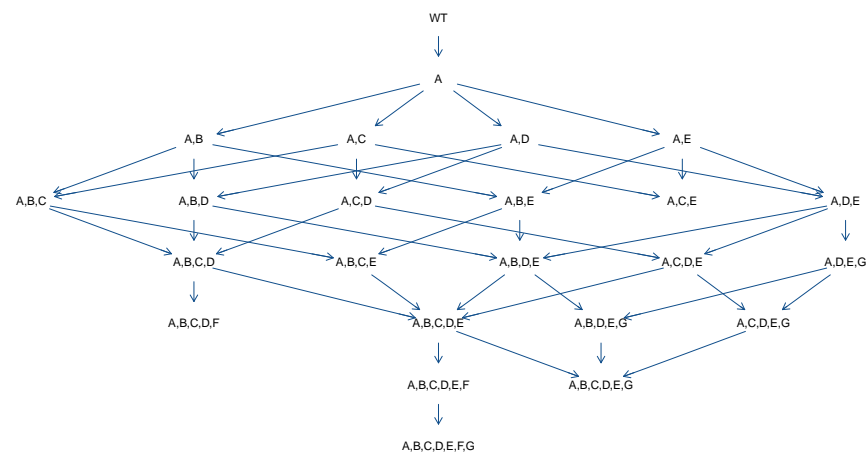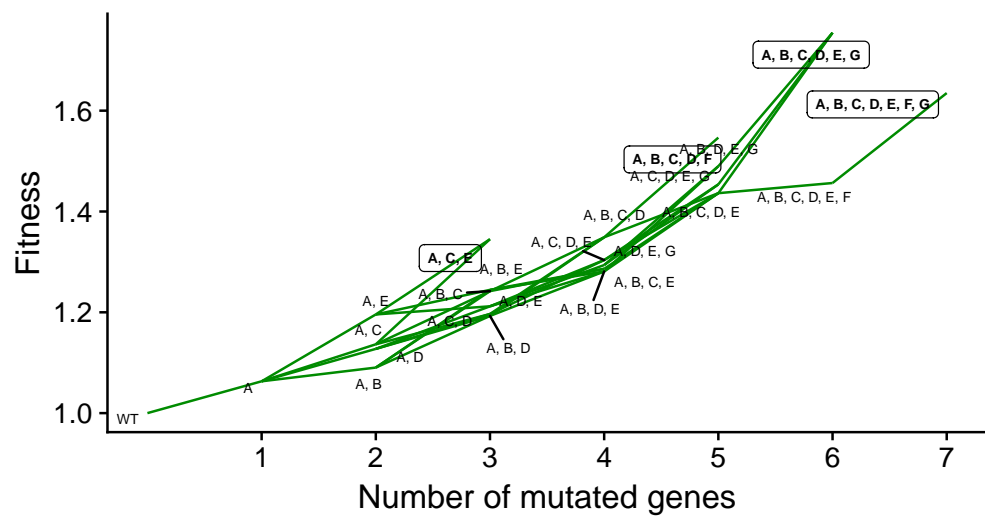

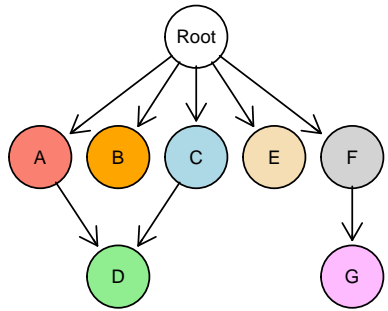

ID **qUS7LZwsUxmyH3in**  
 acc genotypes **60**  
 peaks no back **7**  
 removed edges **32**  
 prop rem edges **0.2**

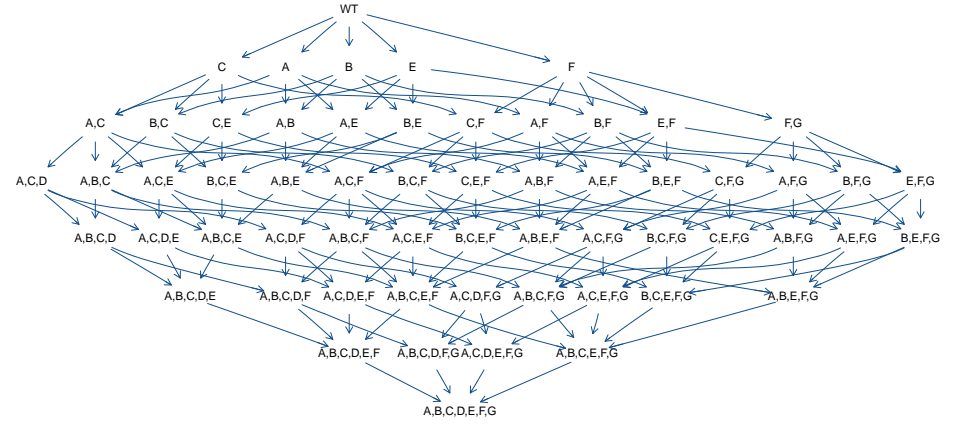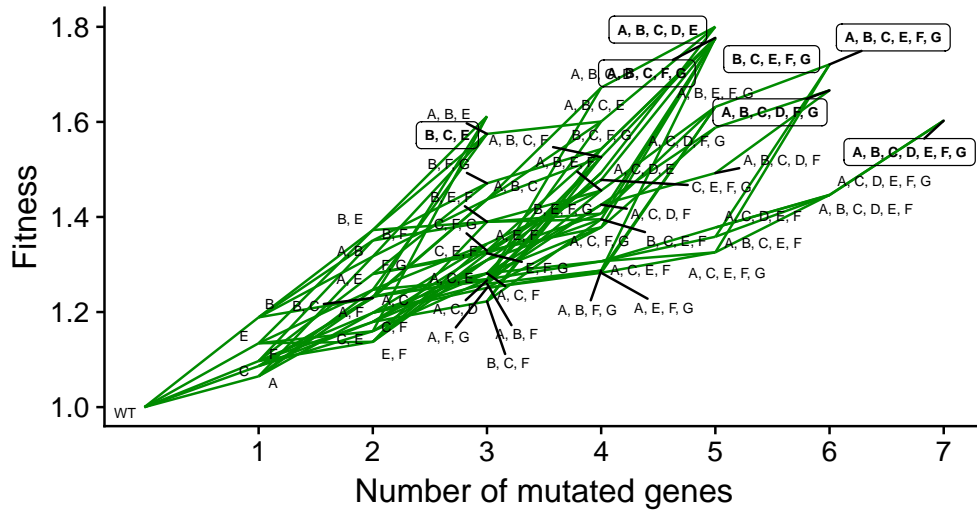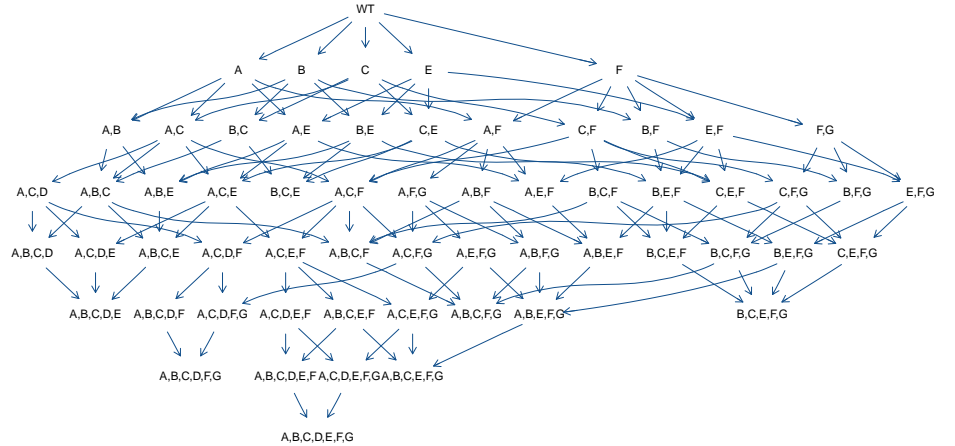

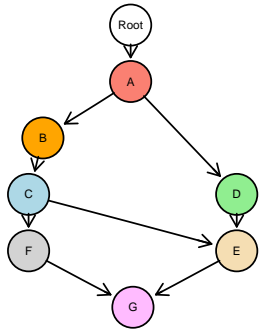

ID **R102qzAOOheDkzBdz**  
 acc genotypes **12**  
 peaks no back **2**  
 removed edges **1**  
 prop rem edges **0.067**

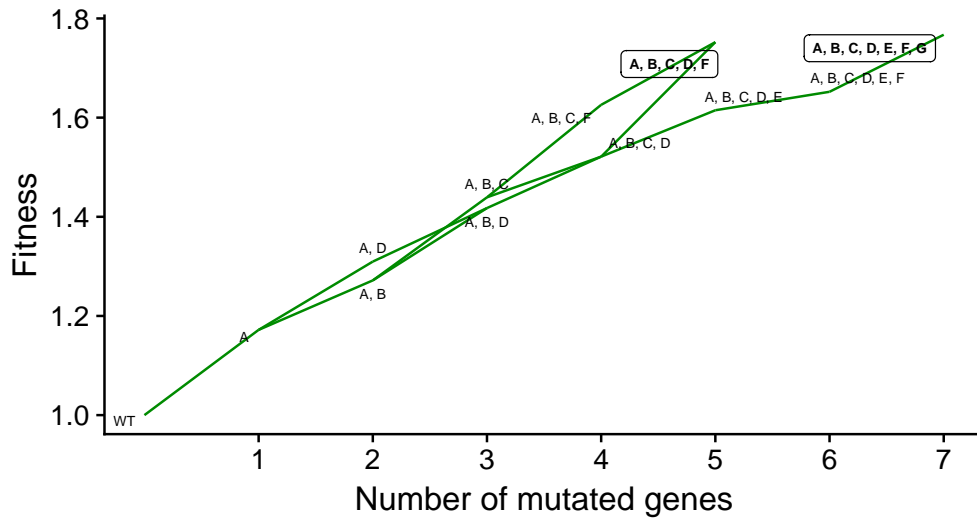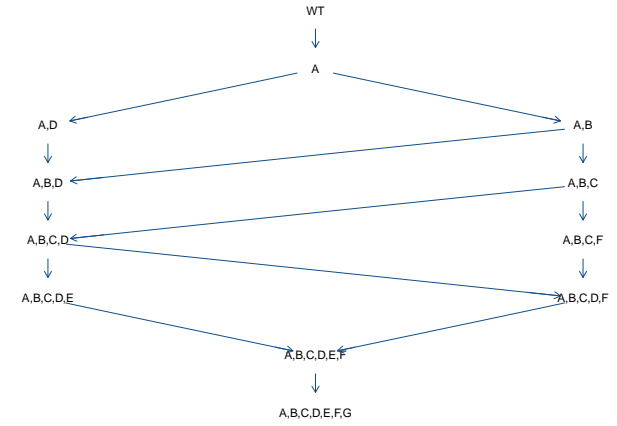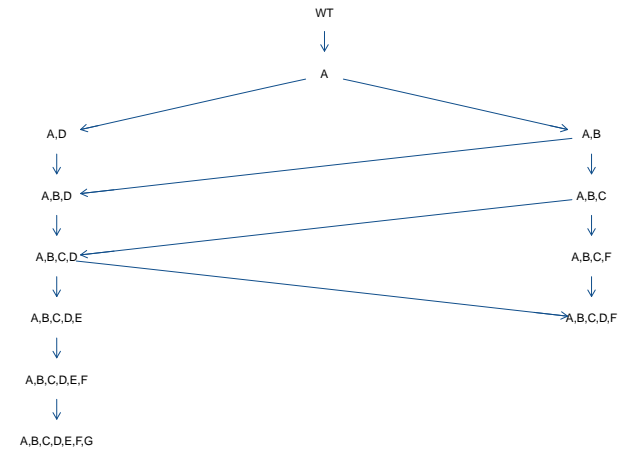

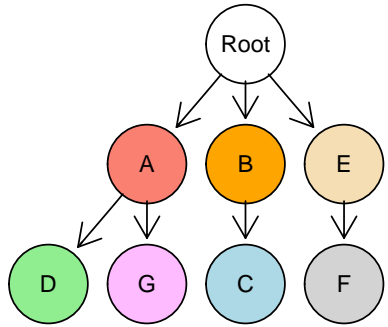

ID **RXEIHdhCdDnzsWrB**  
 acc genotypes **45**  
 peaks no back **6**  
 removed edges **13**  
 prop rem edges **0.124**

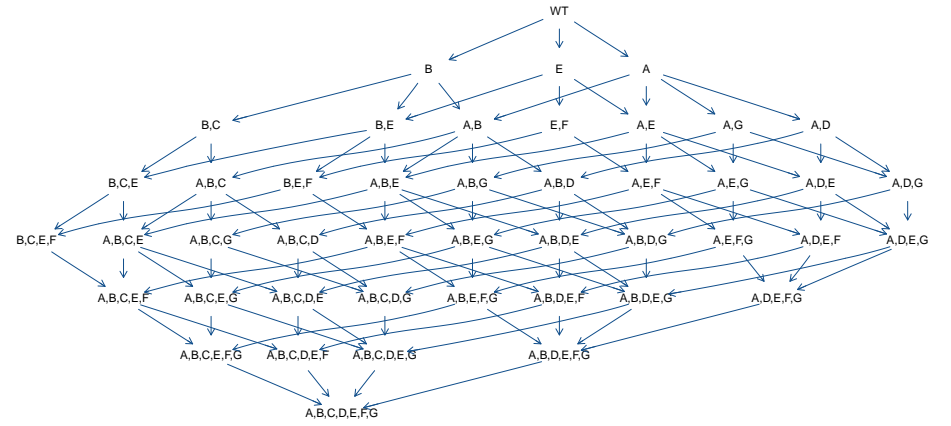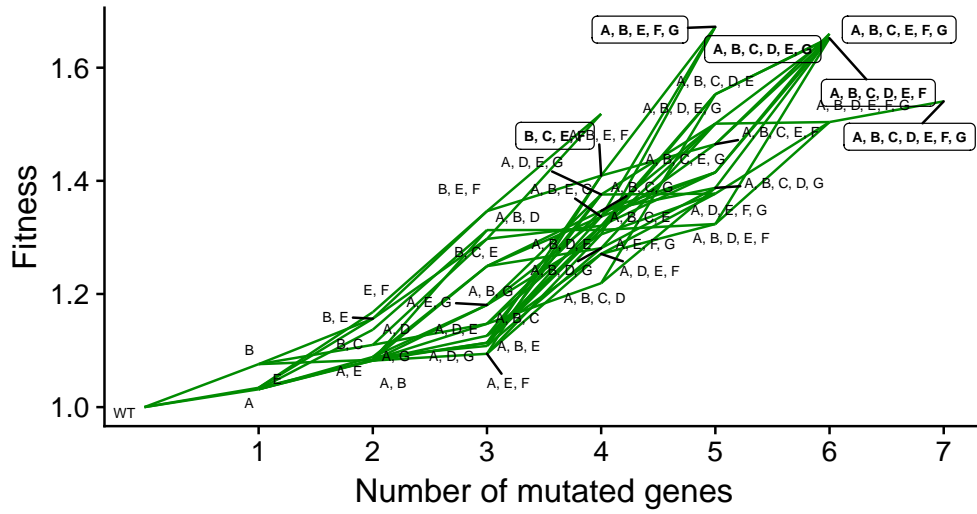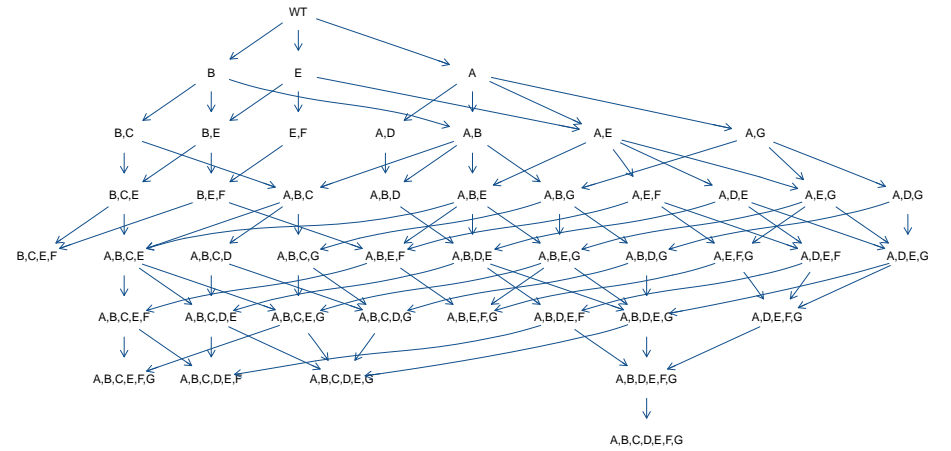



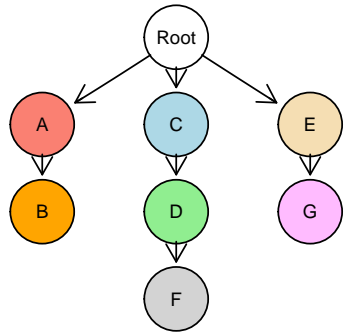

ID ScvT9EQPUJ5Ak10em  
 acc genotypes 36  
 peaks no back 2  
 removed edges 8  
 prop rem edges 0.107

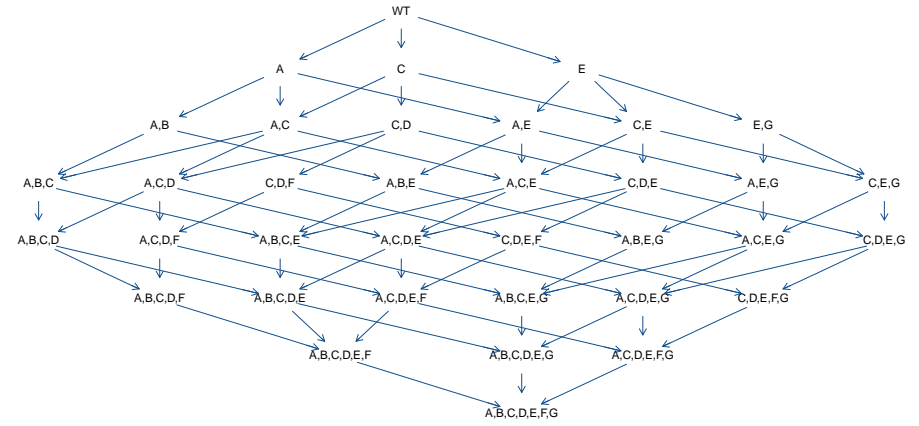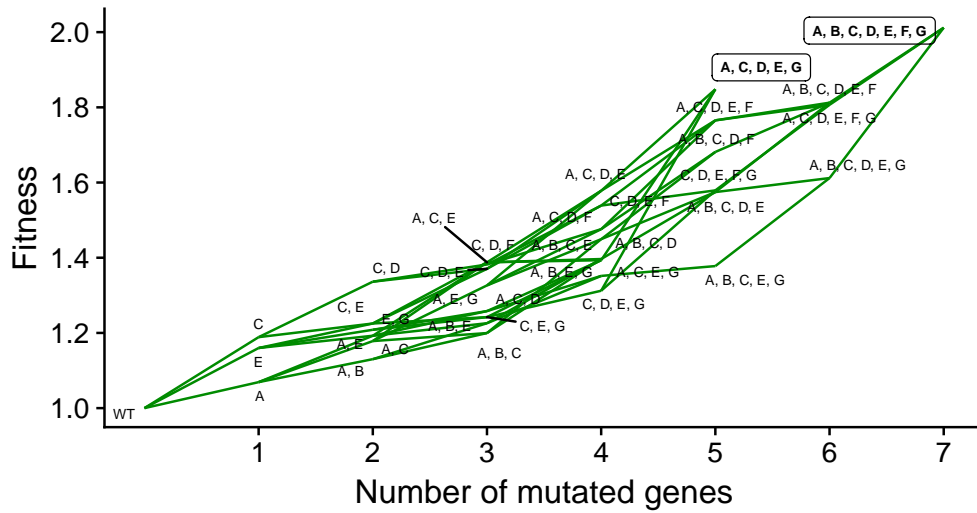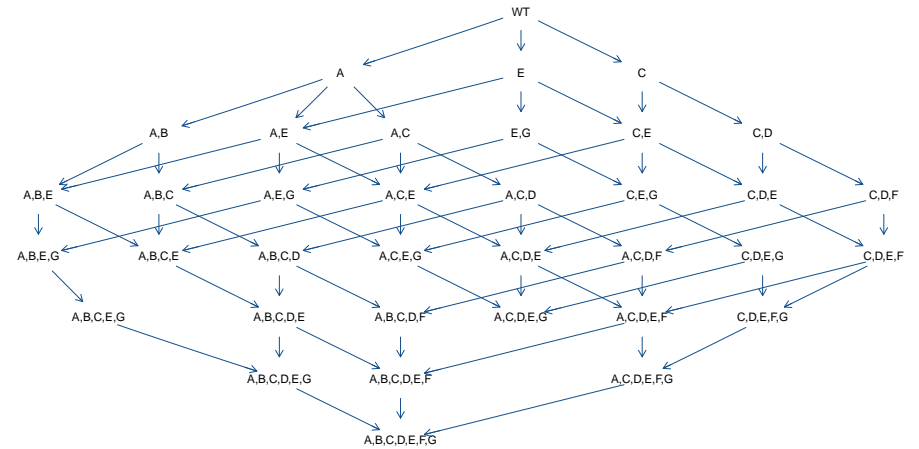

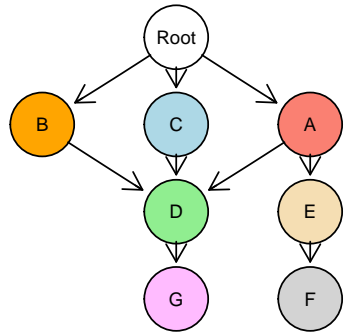

ID [sLsugLzPftgJ7O1e](#)  
 acc genotypes 22  
 peaks no back 2  
 removed edges 3  
 prop rem edges 0.079

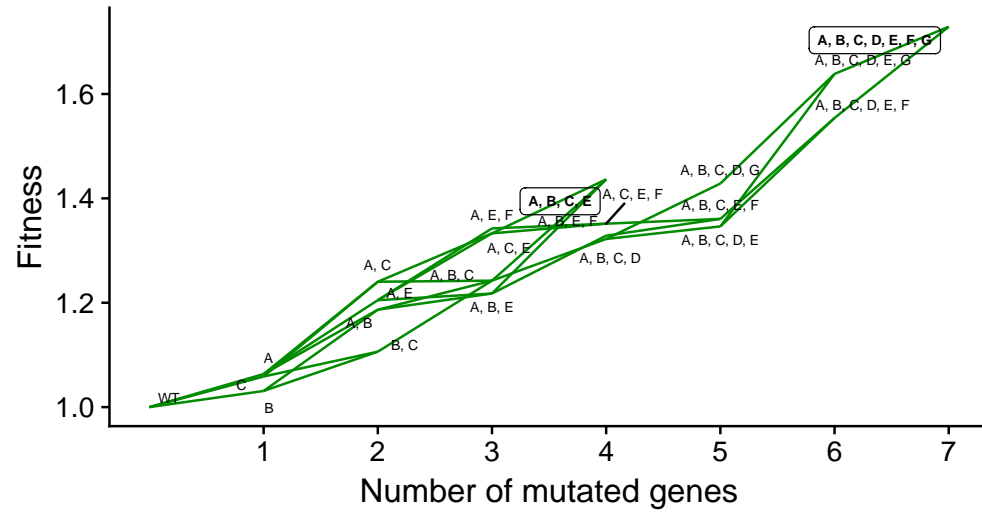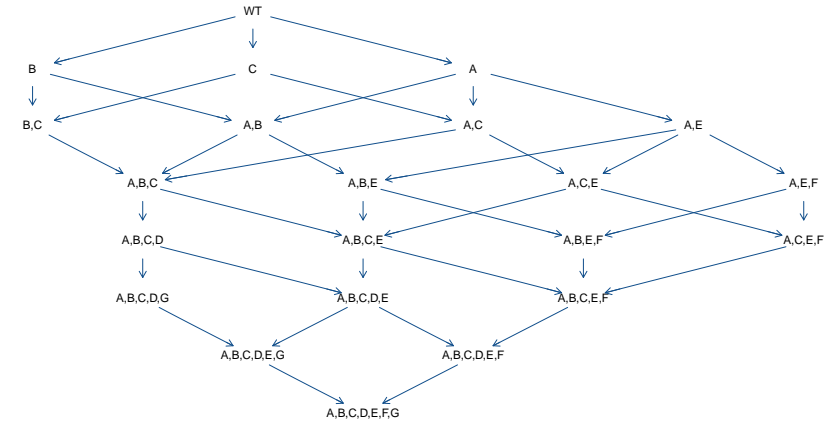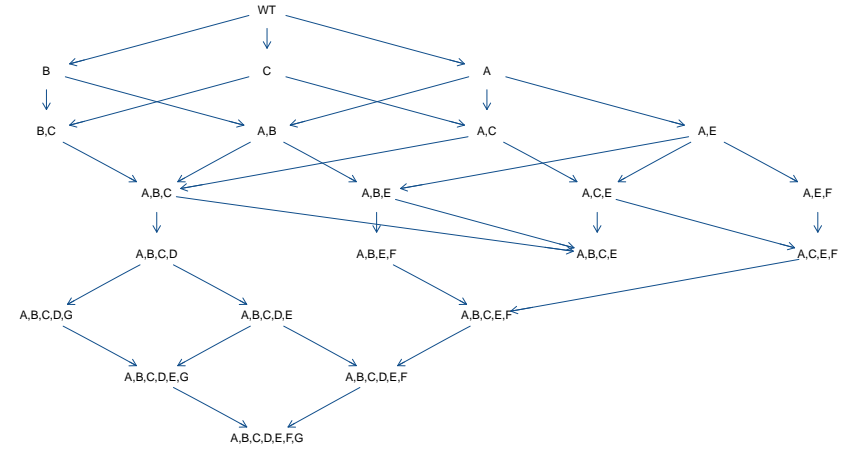

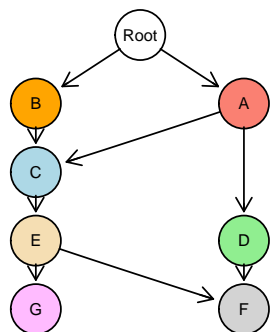

ID SnRRjceljqckEUKX  
 acc genotypes 14  
 peaks no back 3  
 removed edges 2  
 prop rem edges 0.105

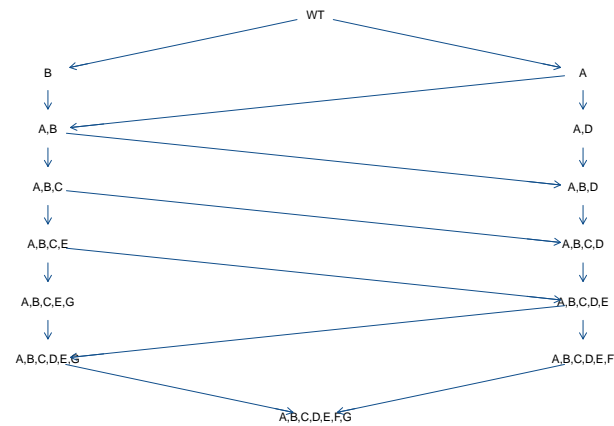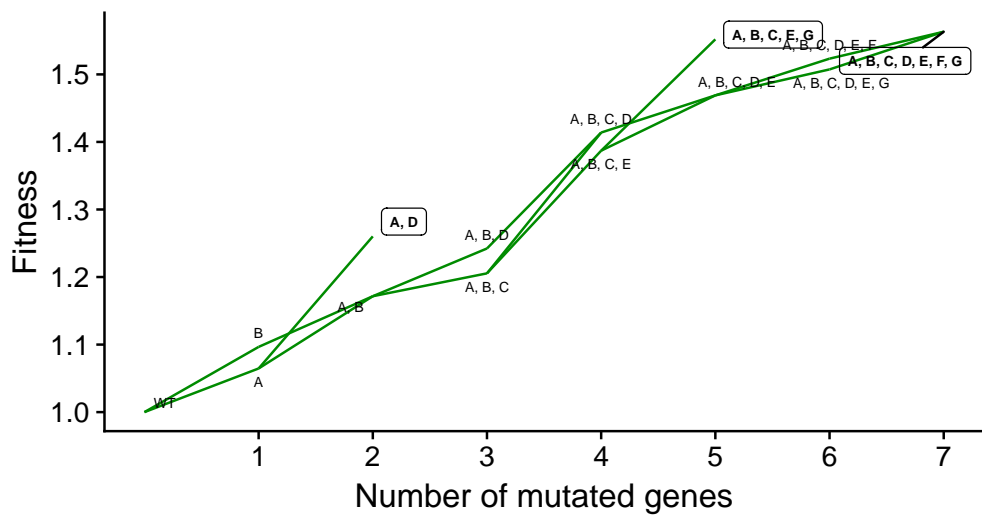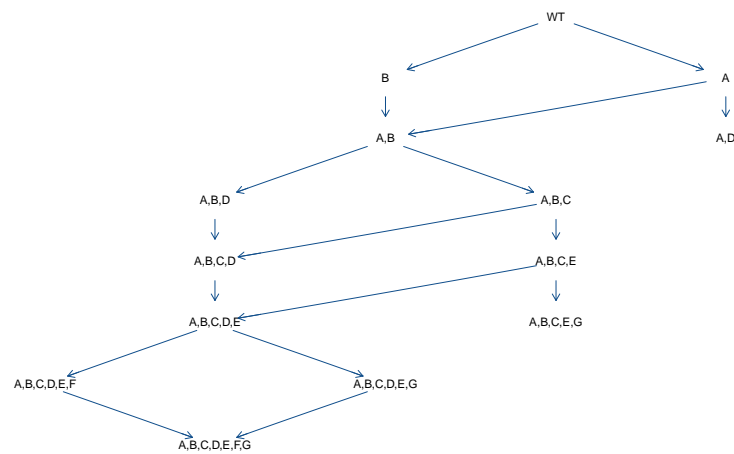

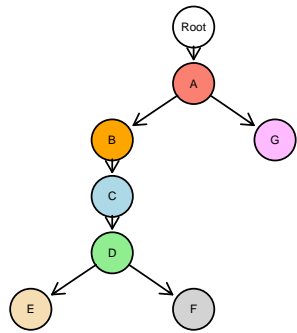

ID [t2kQYfWf61wq10313](#)  
 acc genotypes 15  
 peaks no back 2  
 removed edges 2  
 prop rem edges 0.091

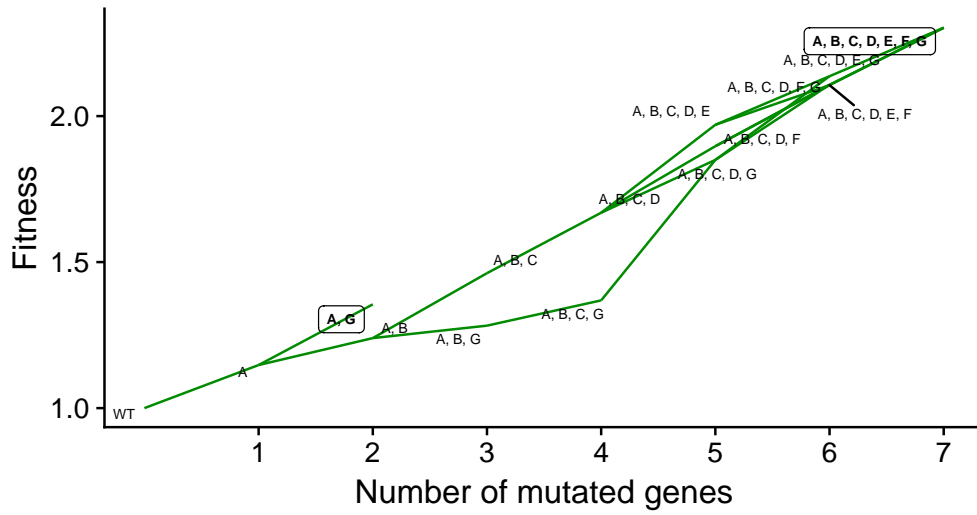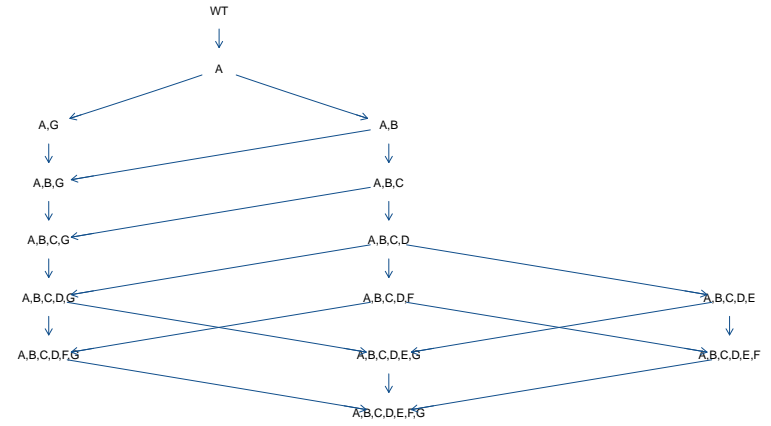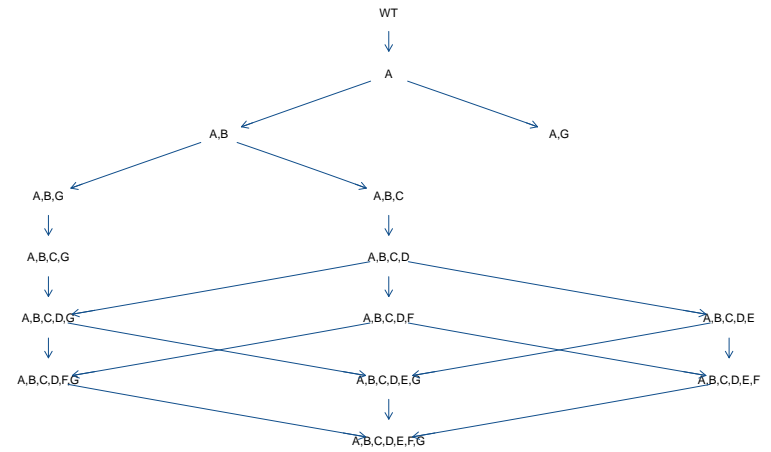

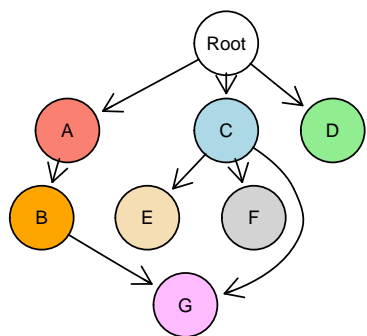

ID **t4BmCLHxEiv103ES6**  
 acc genotypes **38**  
 peaks no back **8**  
 removed edges **17**  
 prop rem edges **0.2**

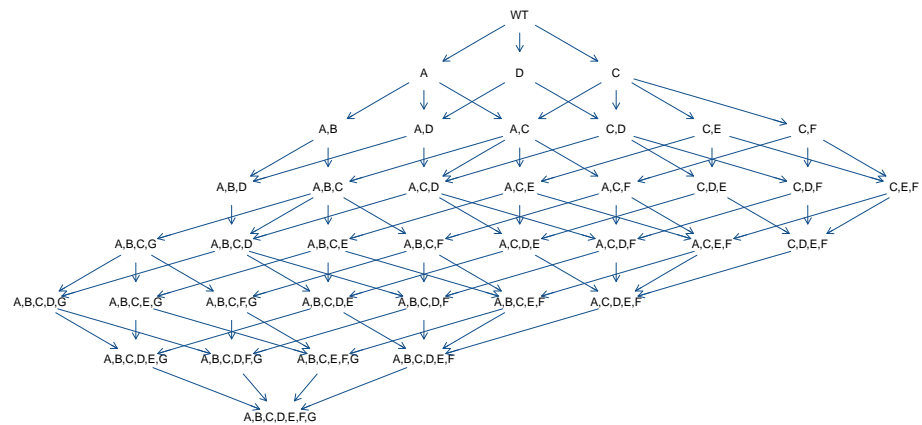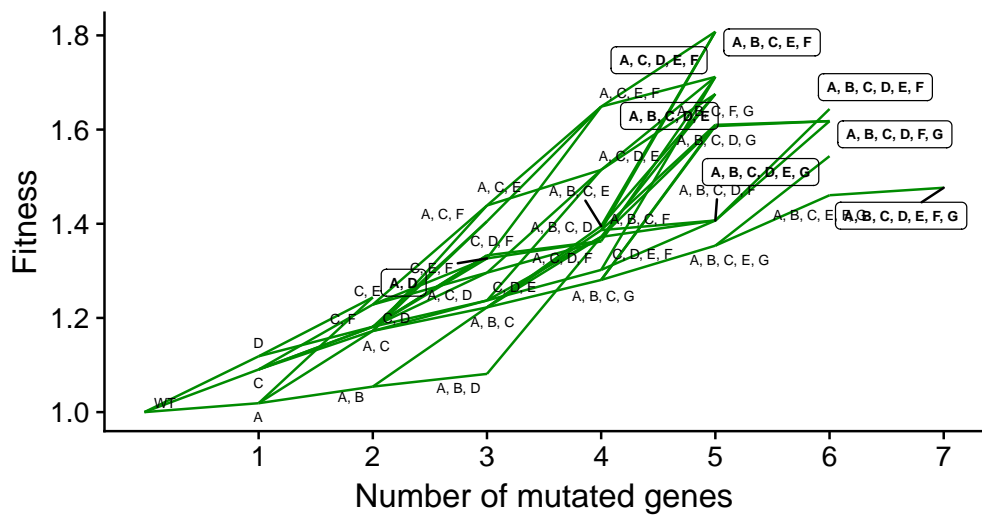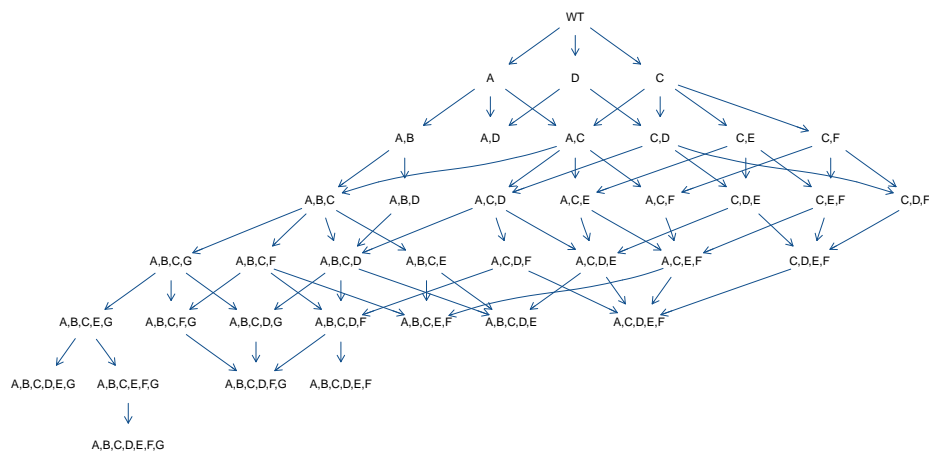

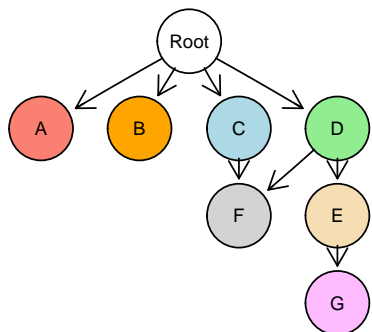

ID **T9n9yW1qk7hj10GjU**  
 acc genotypes **44**  
 peaks no back **7**  
 removed edges **25**  
 prop rem edges **0.24**

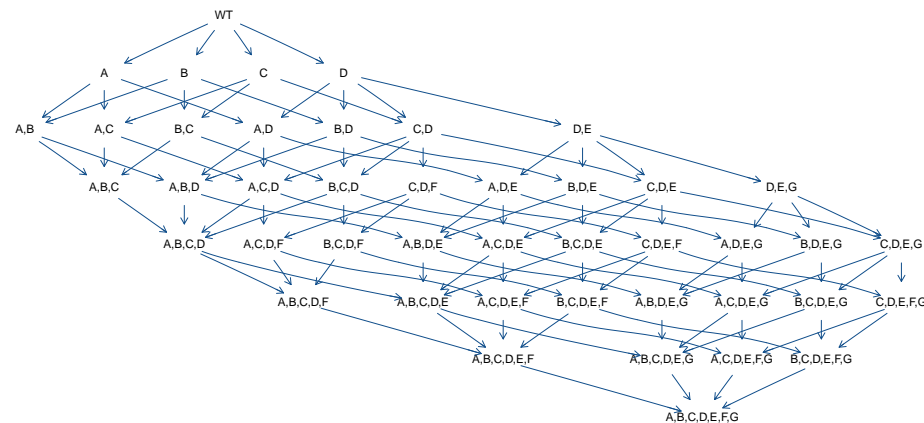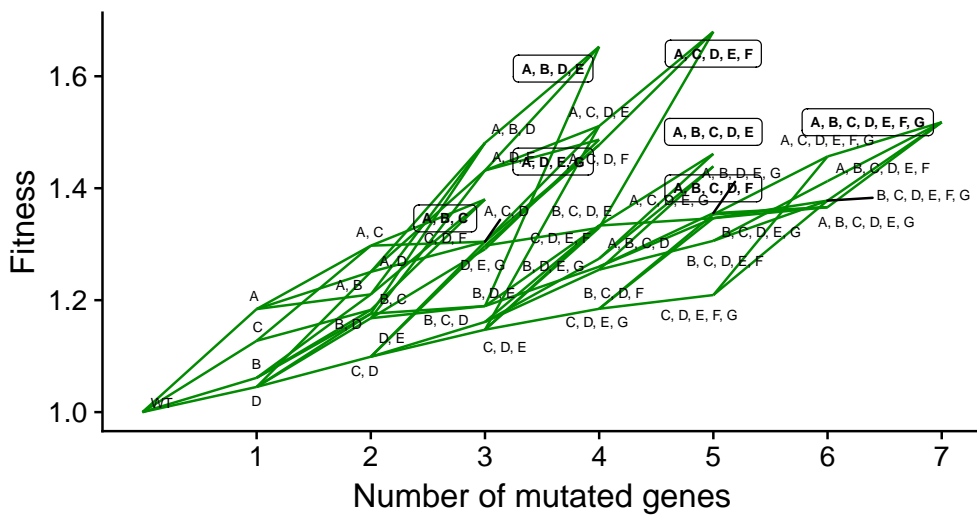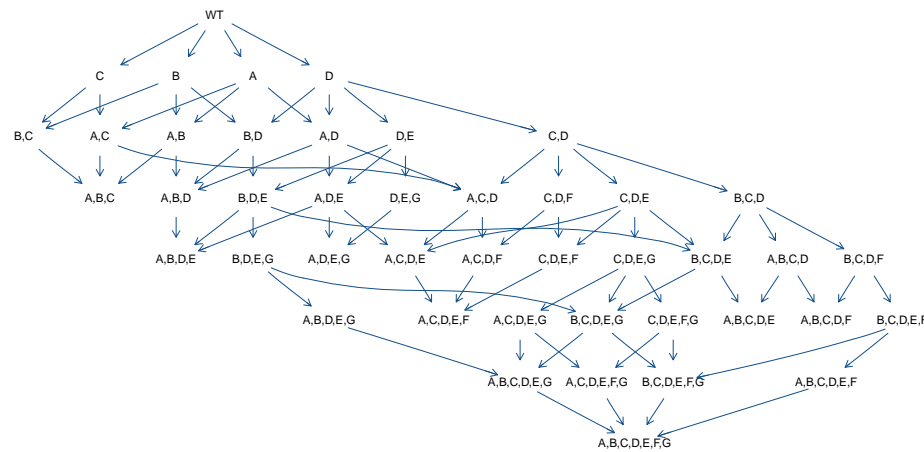

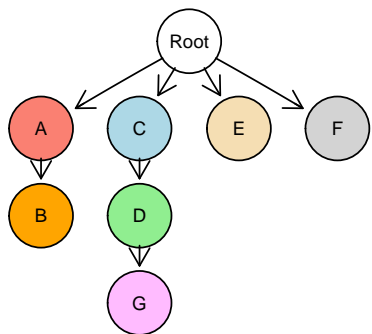

ID TcQu1TxfmYlxeOT4  
 acc genotypes 48  
 peaks no back 6  
 removed edges 19  
 prop rem edges 0.164

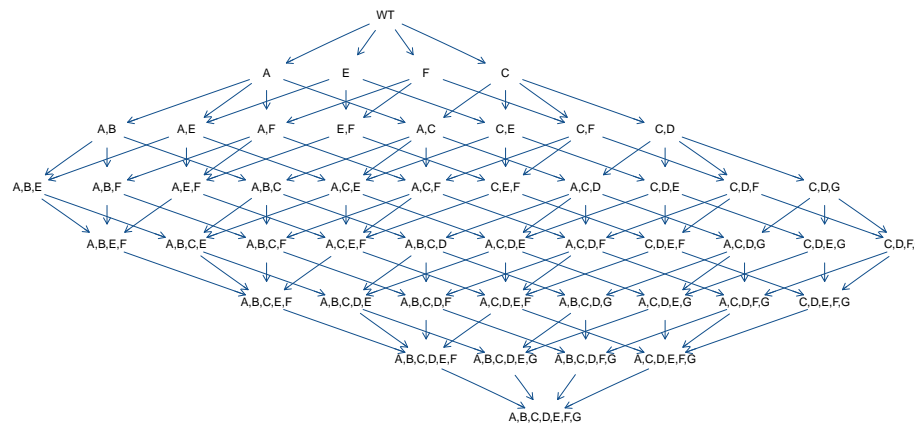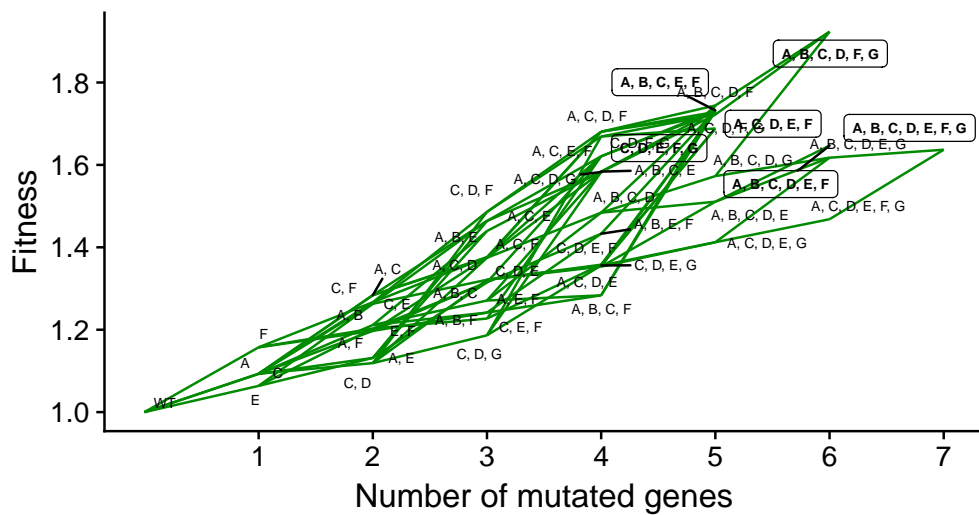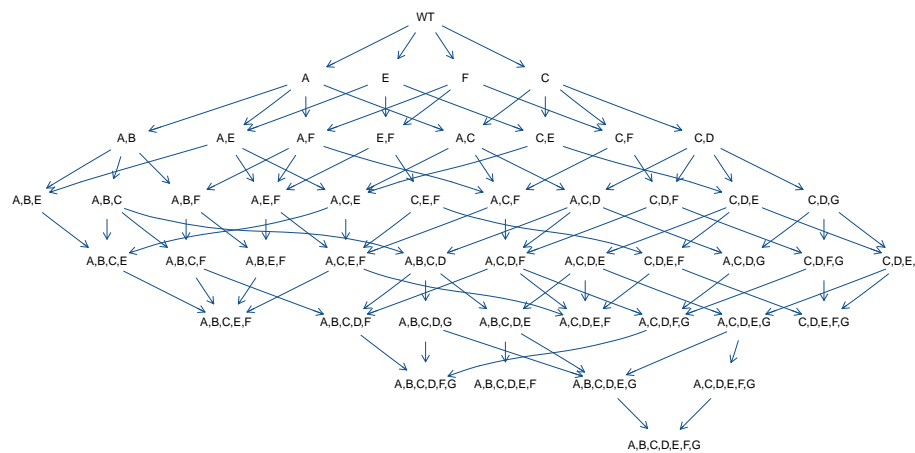

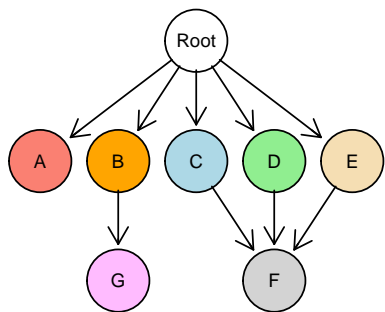

ID [tdjsoypZIFJzIC5O](#)  
 acc genotypes 54  
 peaks no back 7  
 removed edges 23  
 prop rem edges 0.163

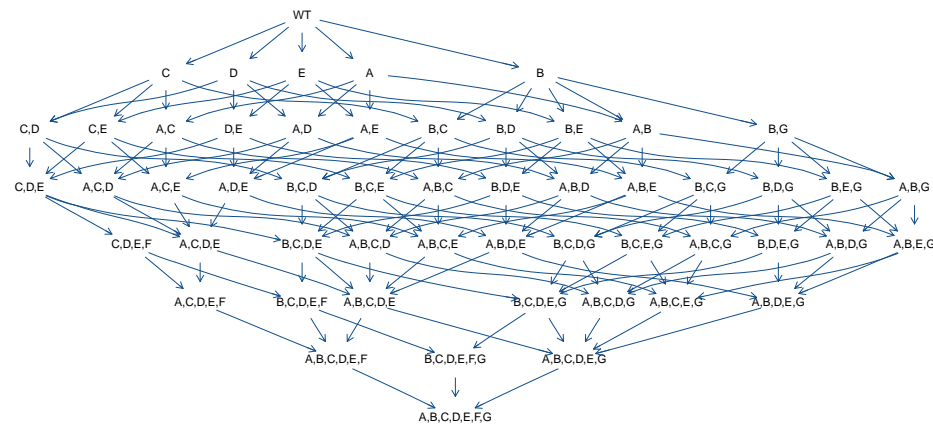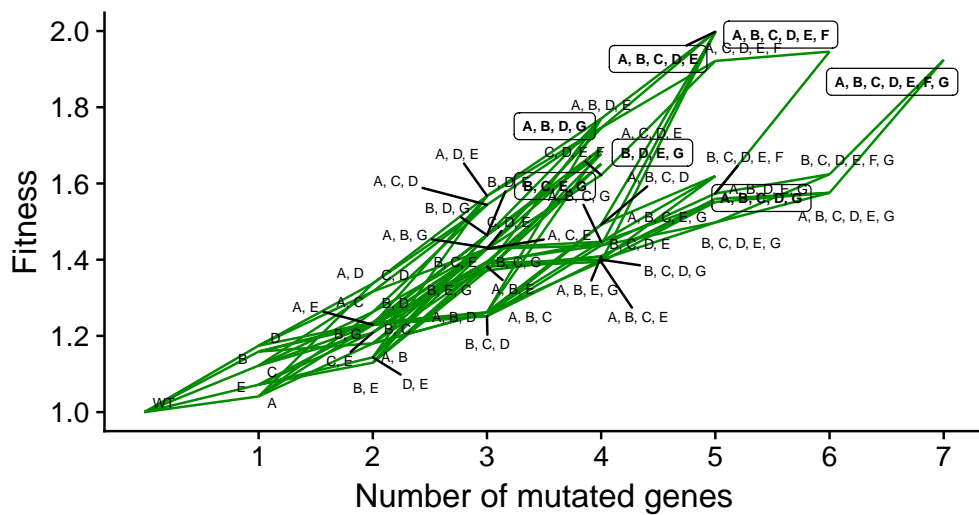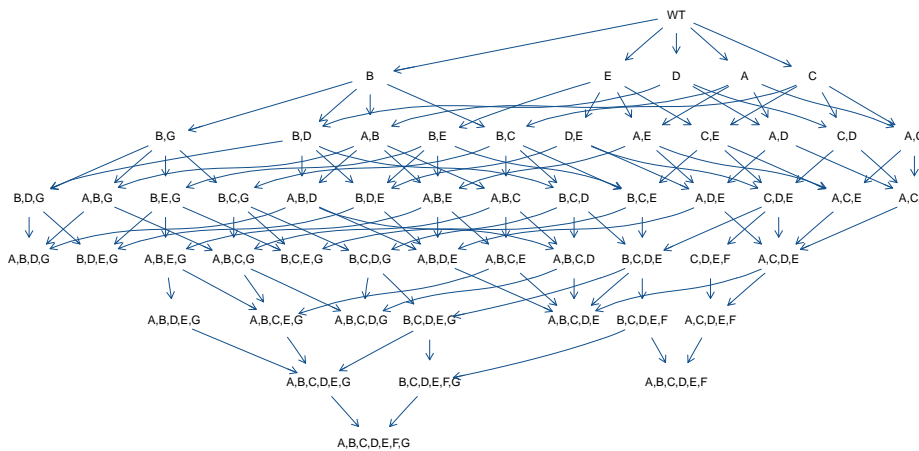



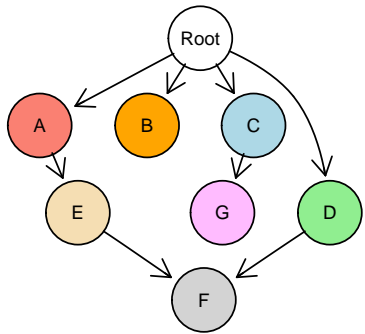

ID **THM3Re8DzitZ9K5X**  
 acc genotypes **42**  
 peaks no back **6**  
 removed edges **12**  
 prop rem edges **0.124**

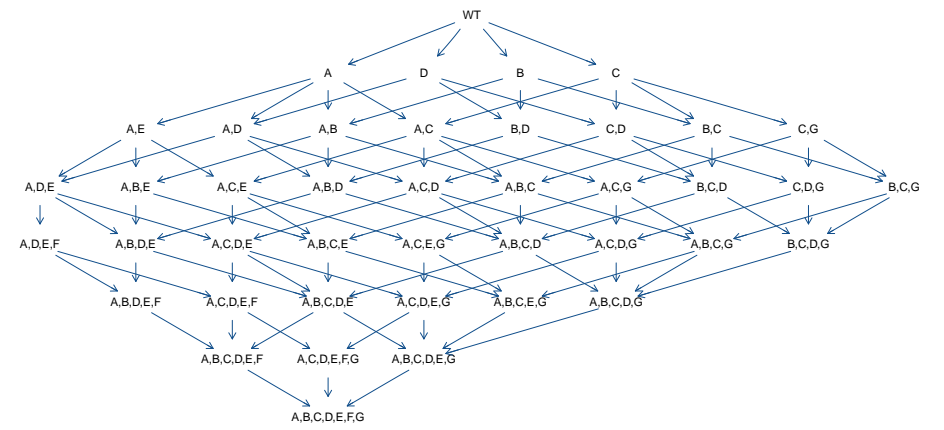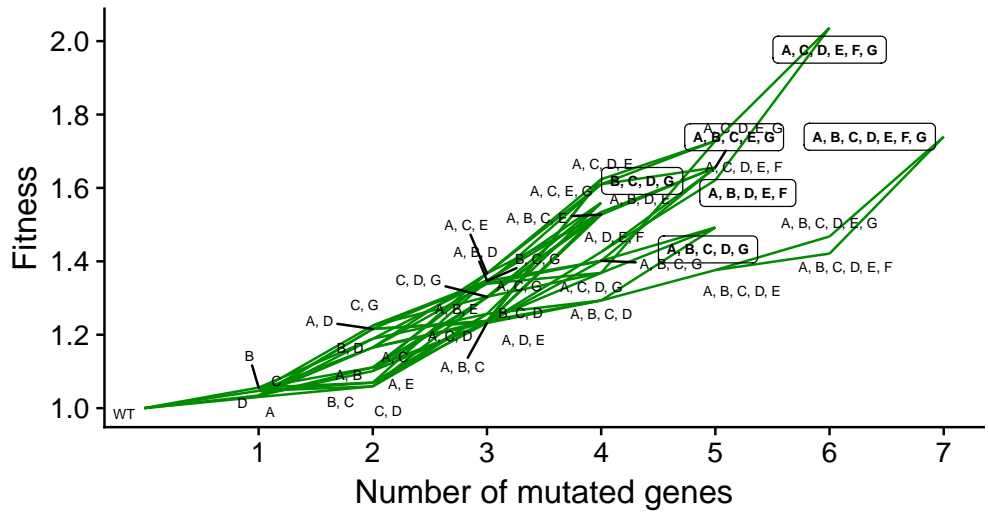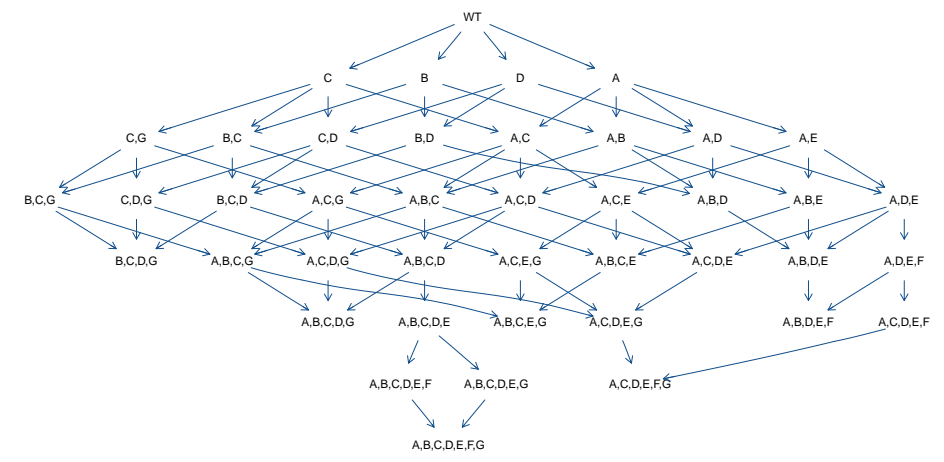

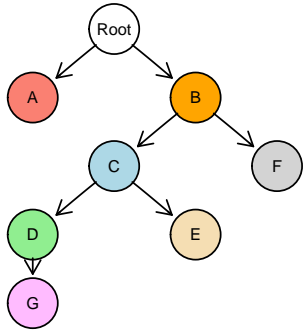

ID **tPr5Vg10103qrkePxM**  
 acc genotypes **30**  
 peaks no back **5**  
 removed edges **10**  
 prop rem edges **0.159**

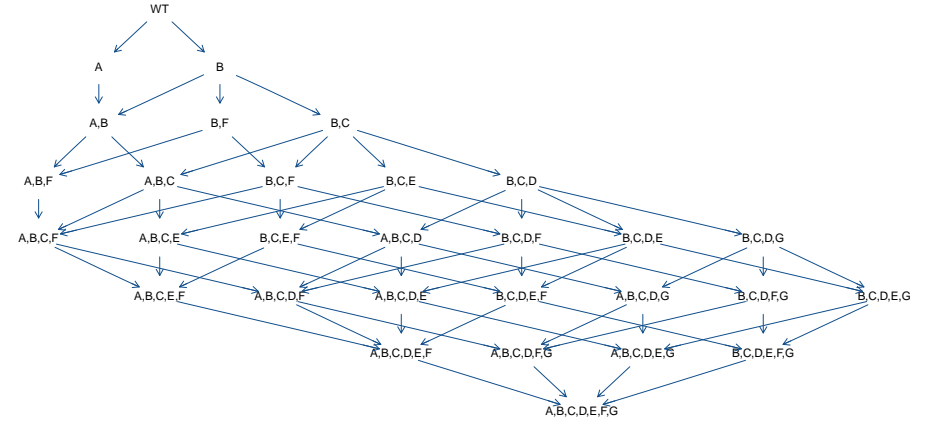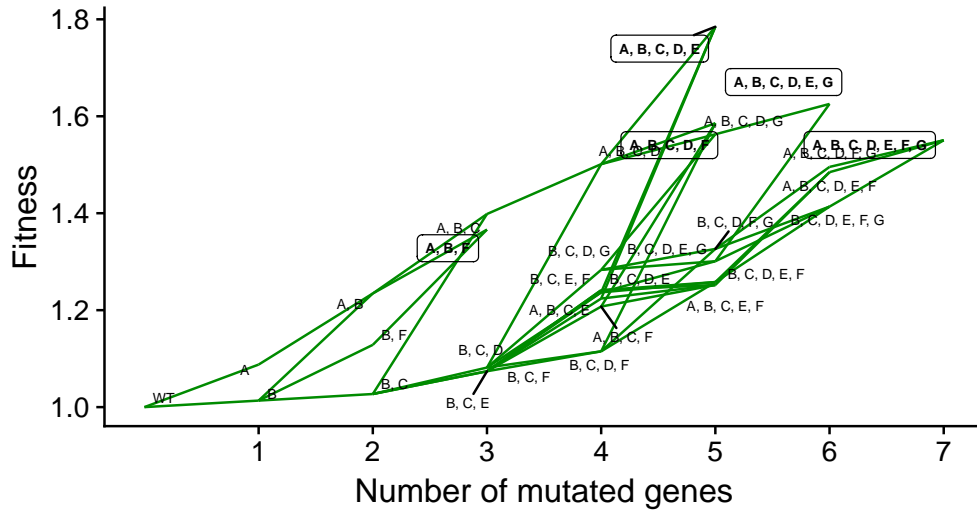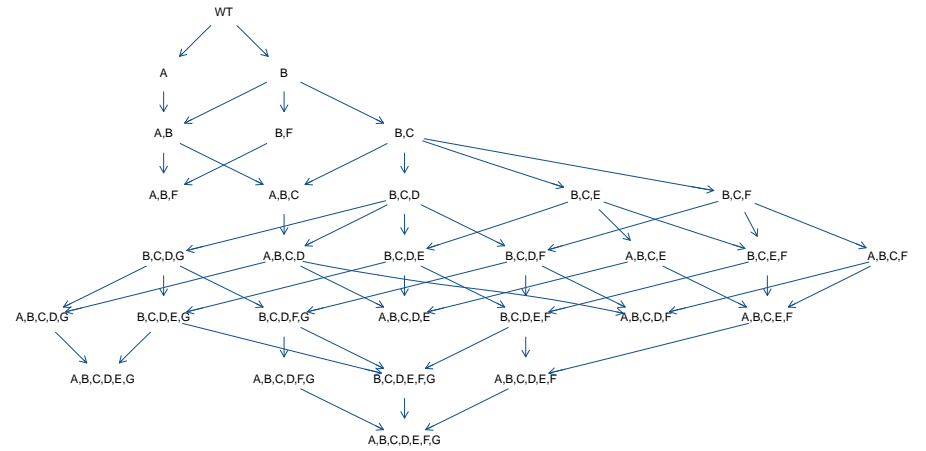

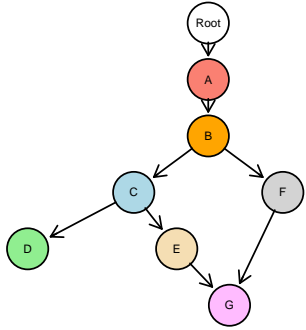

ID **tZ722GsITVDN5PNF**  
 acc genotypes **14**  
 peaks no back **4**  
 removed edges **4**  
 prop rem edges **0.2**

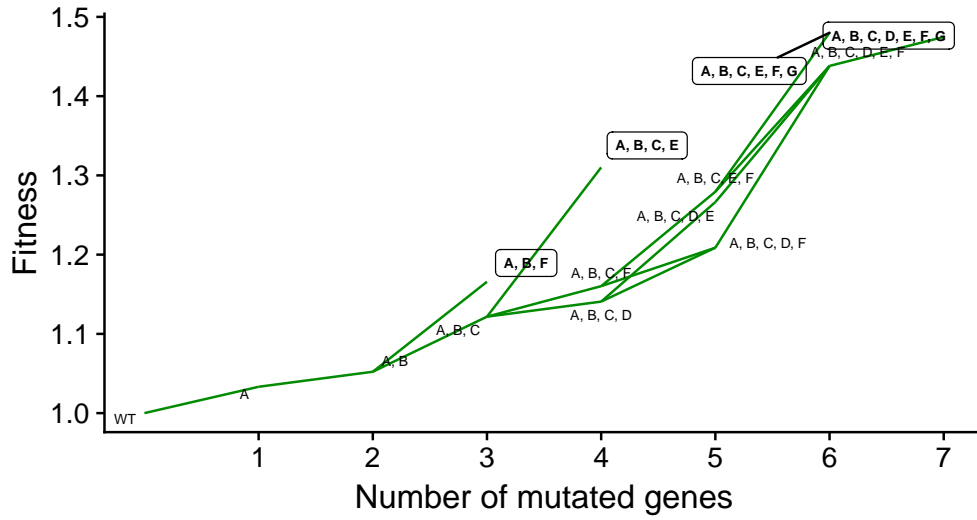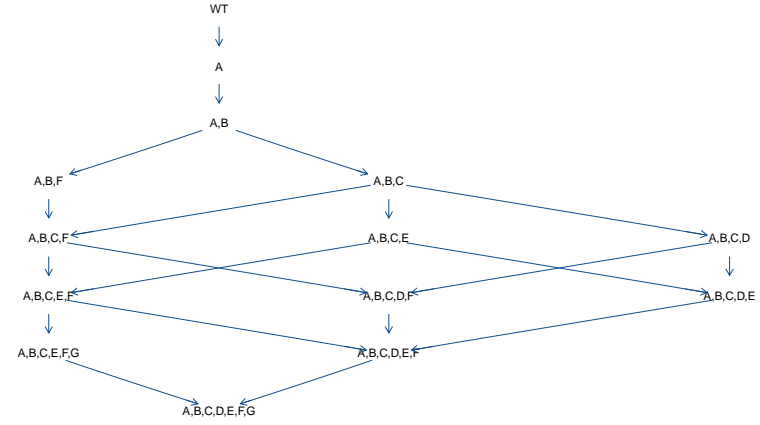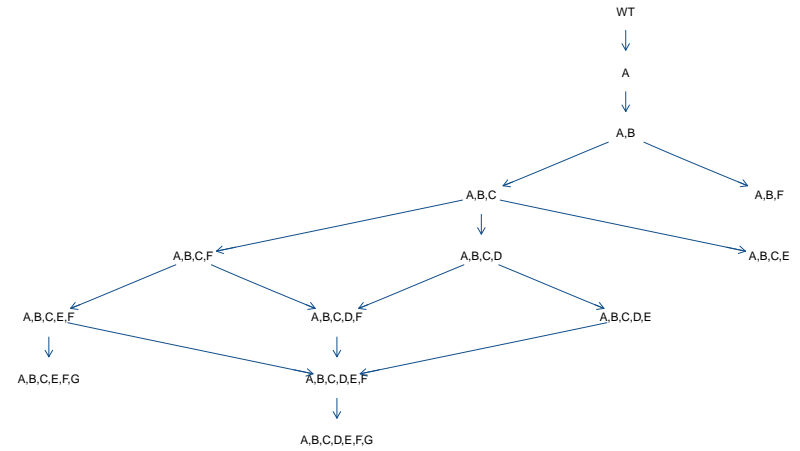

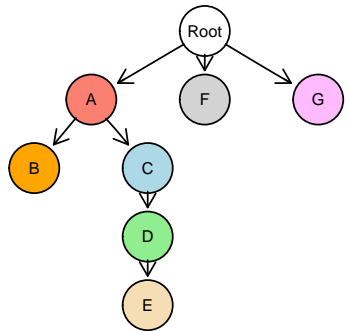

ID U3F9k2e17pCATrZA  
 acc genotypes 36  
 peaks no back 6  
 removed edges 9  
 prop rem edges 0.112

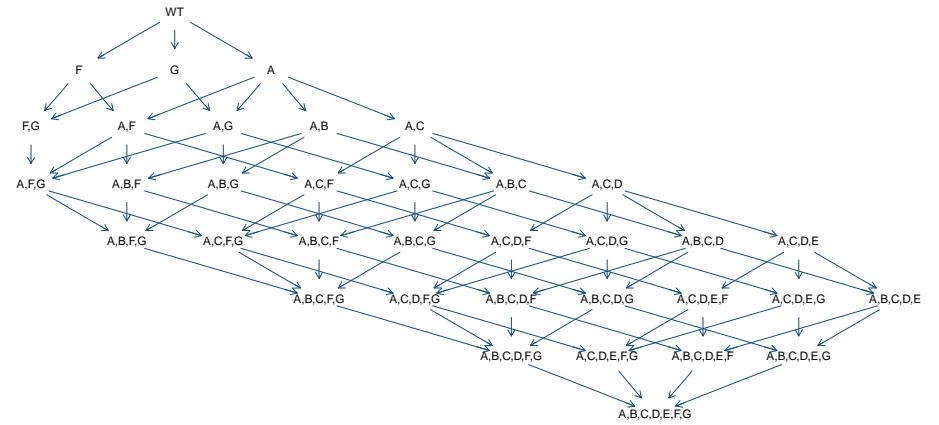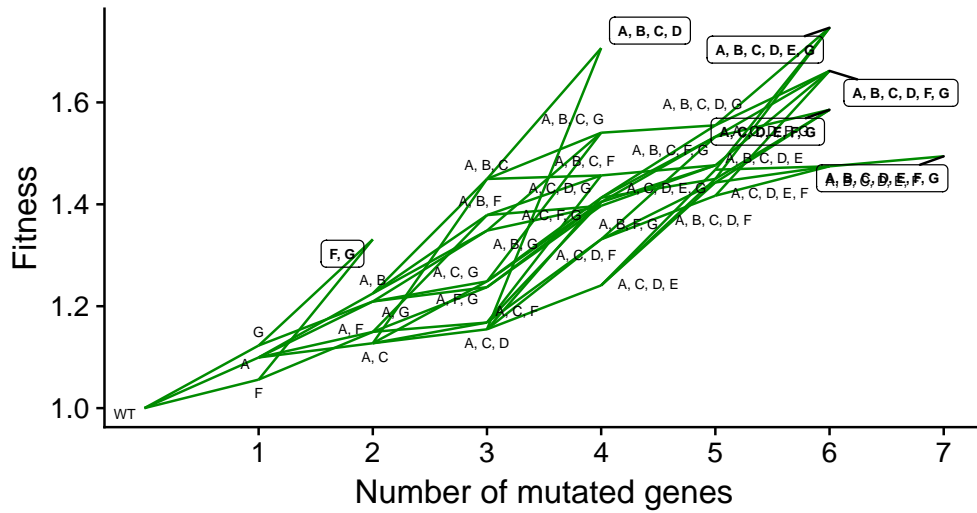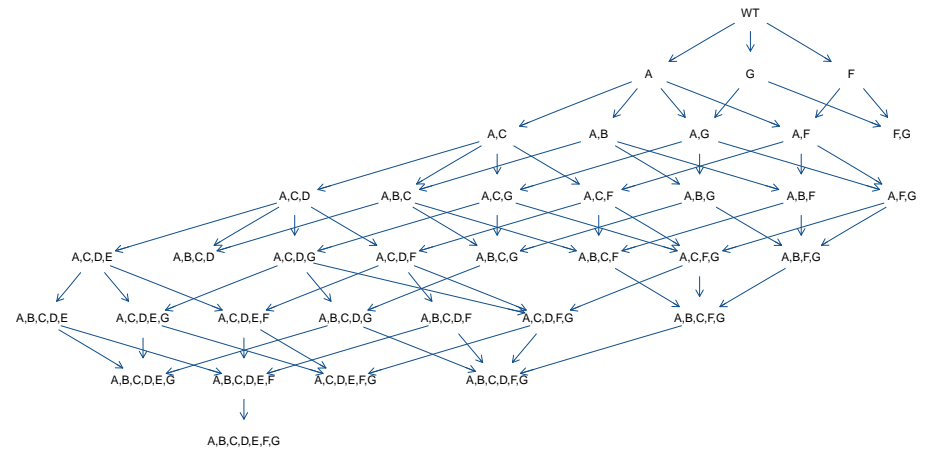

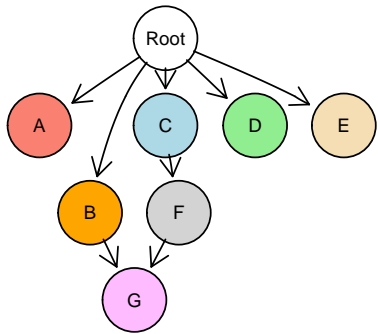

ID **u5c4a1CX10bL5RtgV**  
 acc genotypes **56**  
 peaks no back **7**  
 removed edges **27**  
 prop rem edges **0.182**

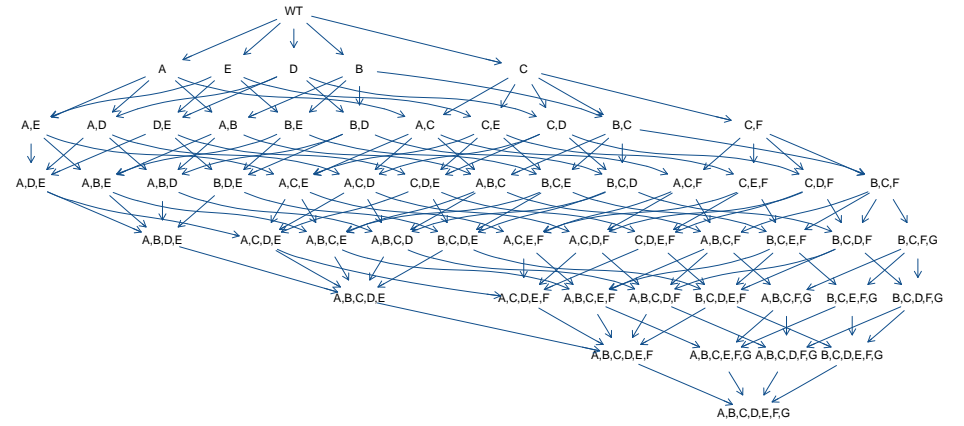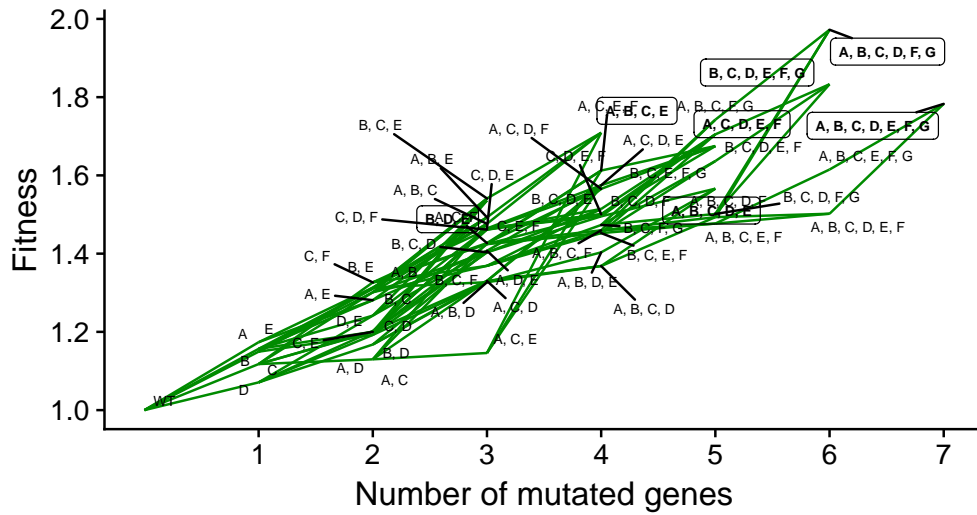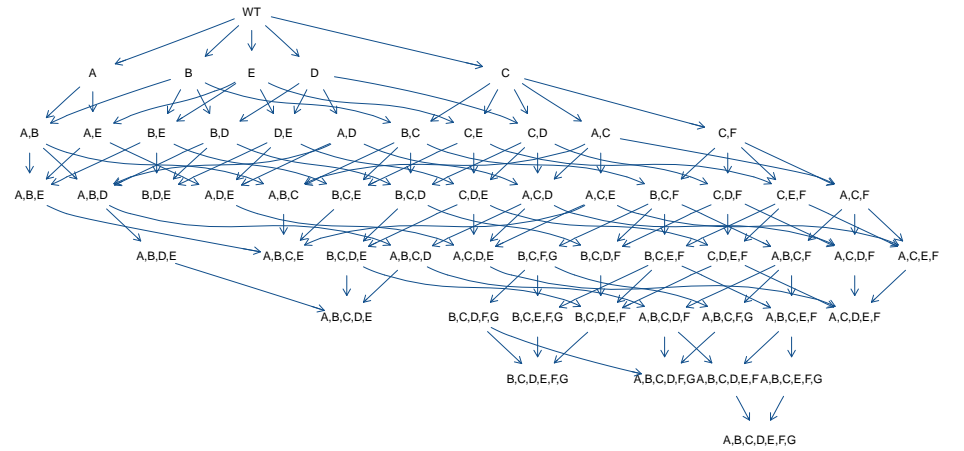

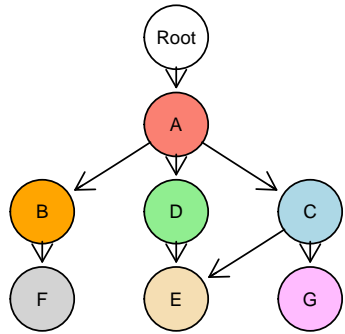

ID **U7zMFhVmpGvNZWah**  
 acc genotypes **25**  
 peaks no back **6**  
 removed edges **9**  
 prop rem edges **0.191**

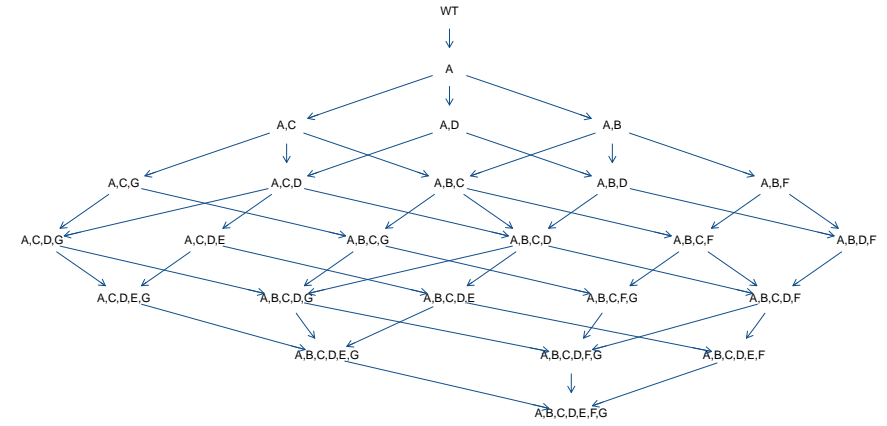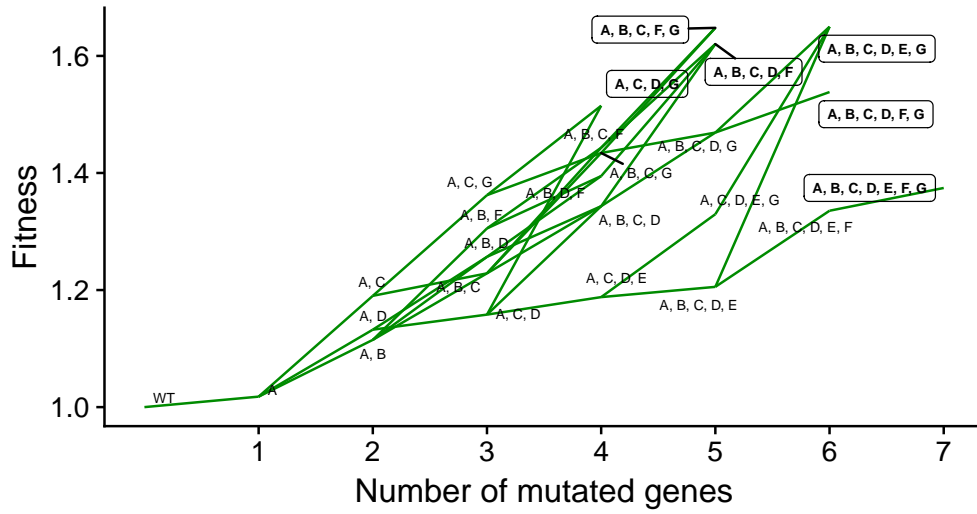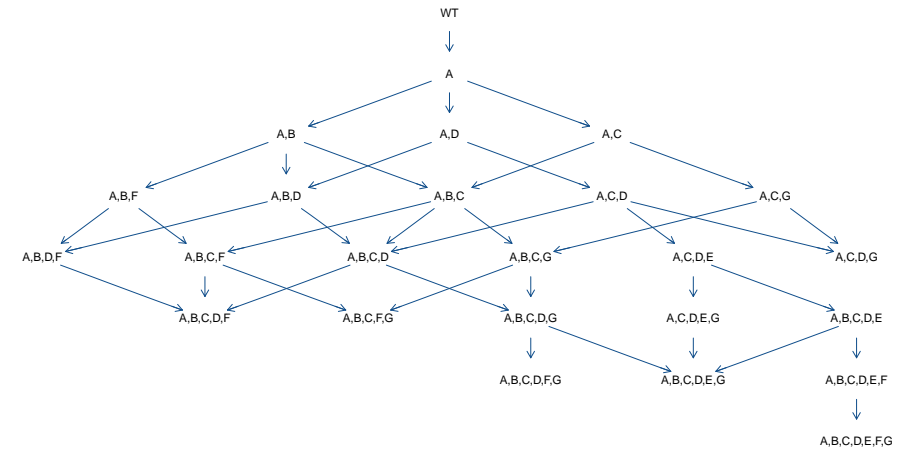

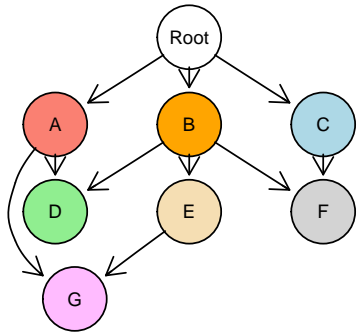

ID **UICZ6OQWroBIY8ER**  
 acc genotypes **28**  
 peaks no back **3**  
 removed edges **4**  
 prop rem edges **0.074**

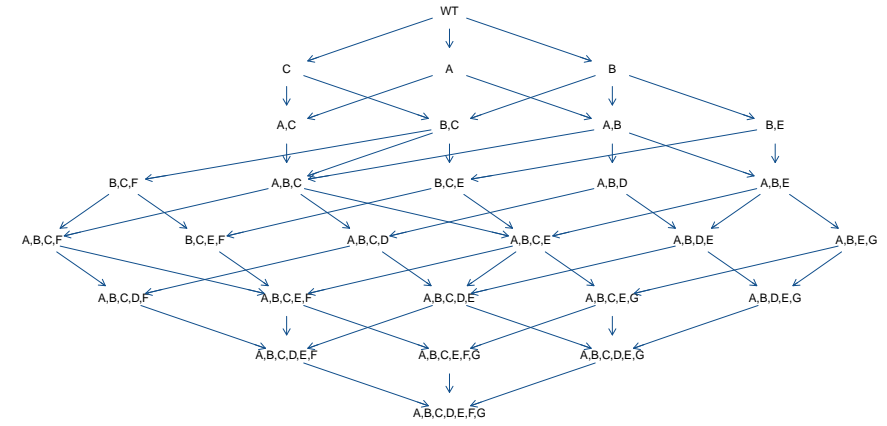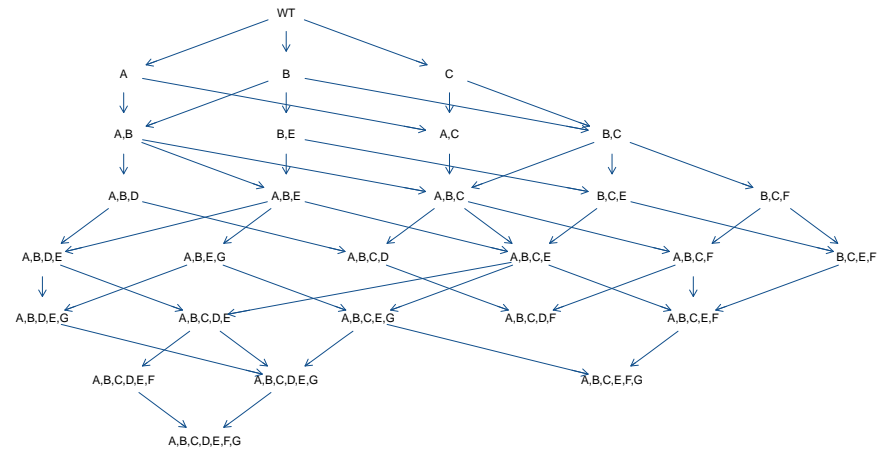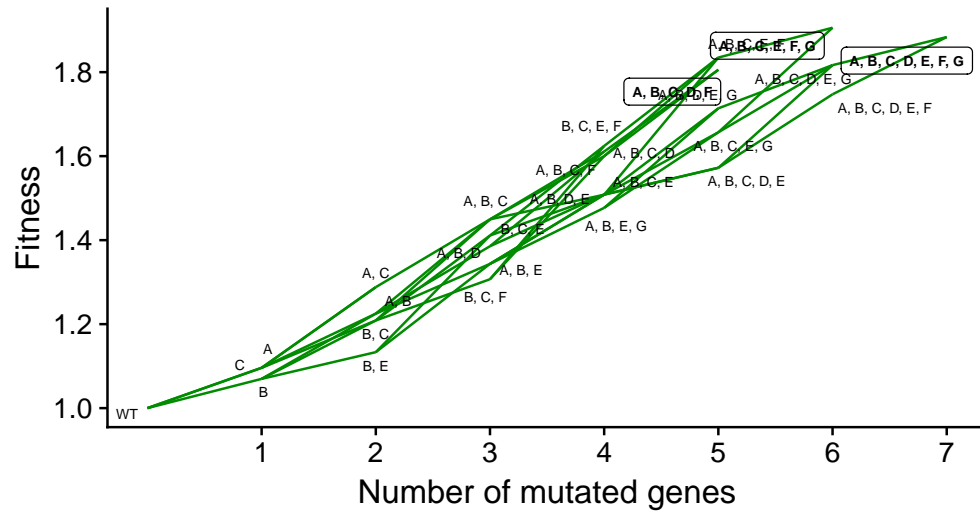

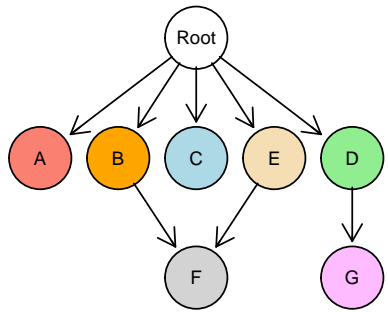

ID **unh1zVBv7V9gaHC5**  
 acc genotypes **60**  
 peaks no back **7**  
 removed edges **29**  
 prop rem edges **0.181**

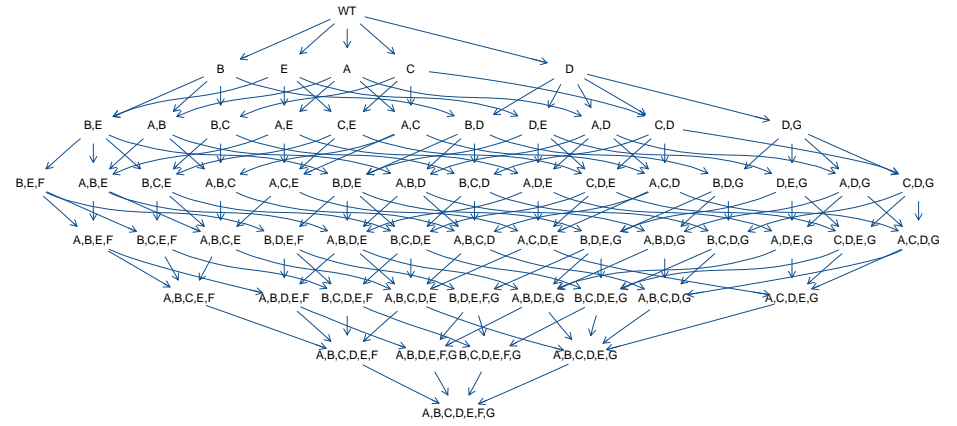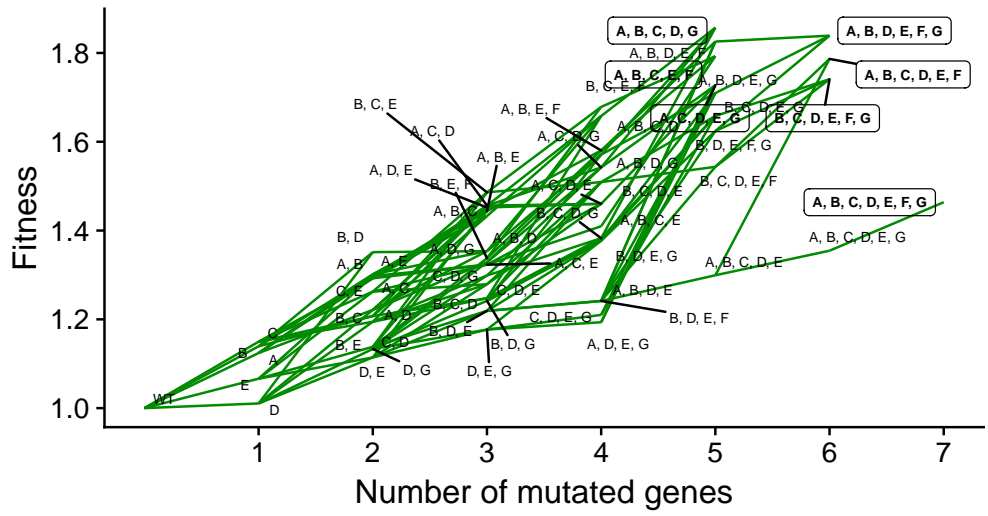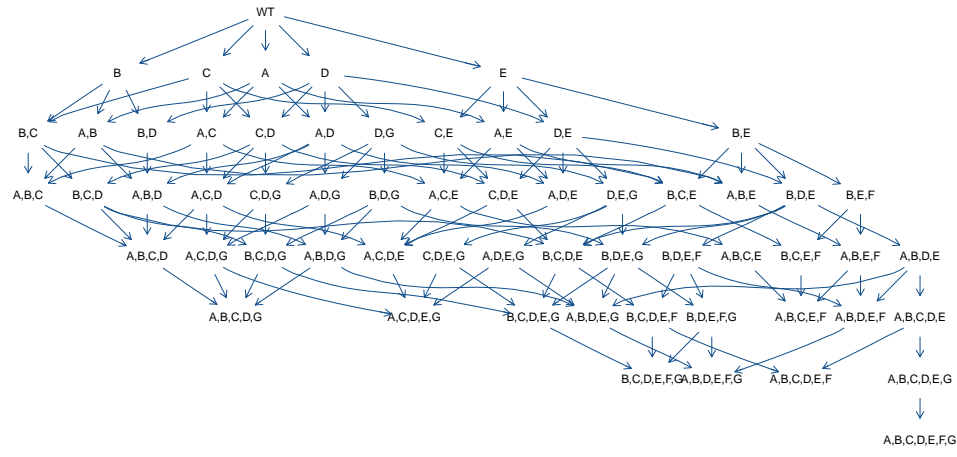



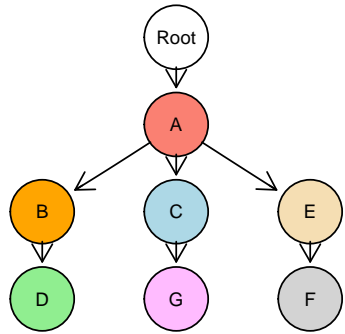

ID **uOqI5ivL2U4HWUKS**  
 acc genotypes **28**  
 peaks no back **4**  
 removed edges **4**  
 prop rem edges **0.073**

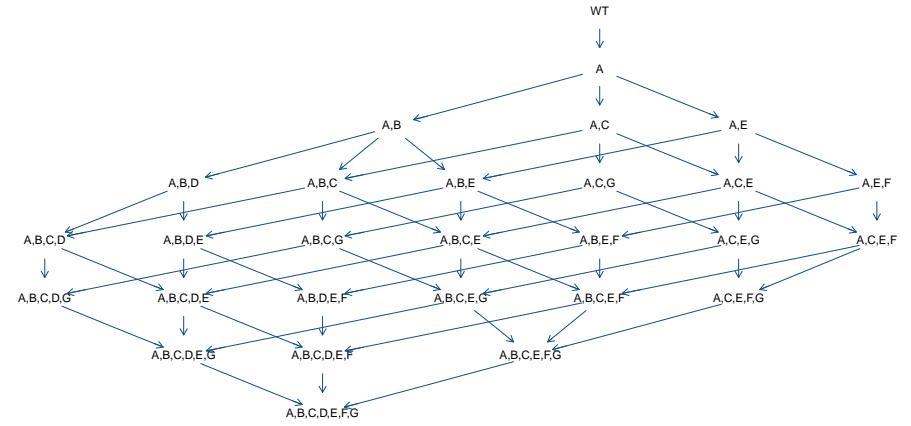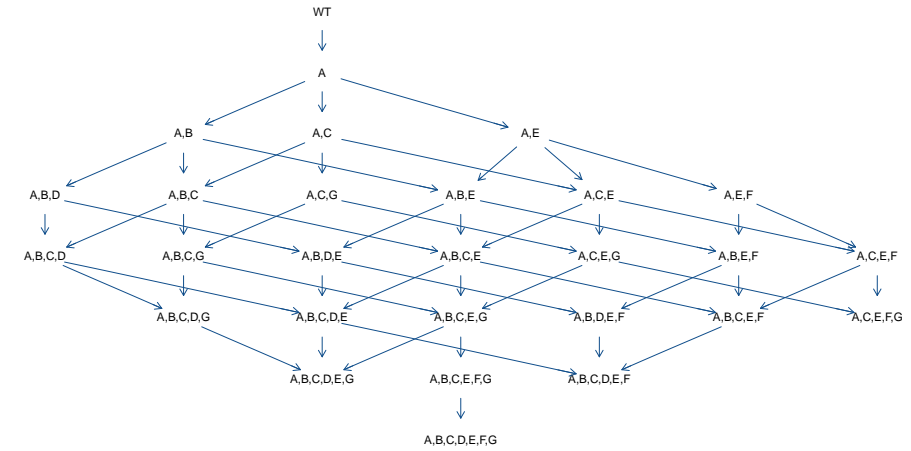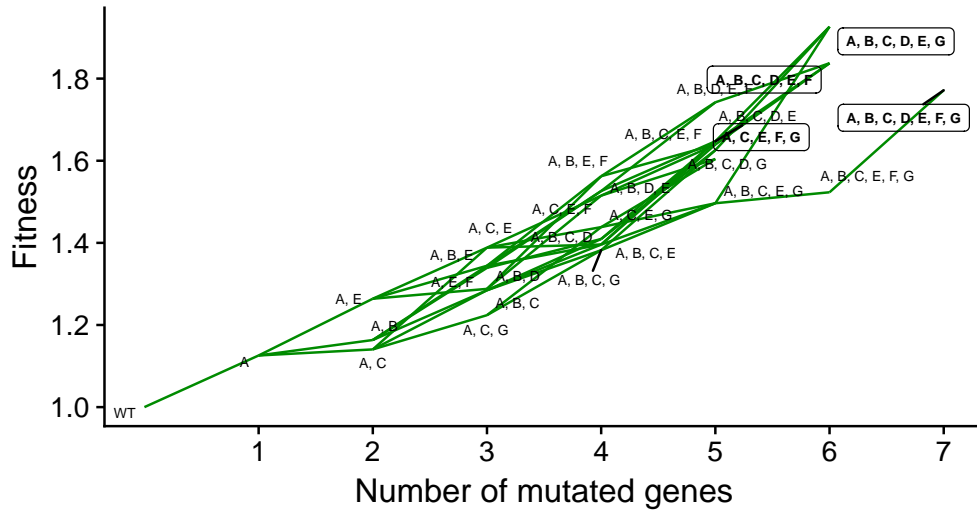

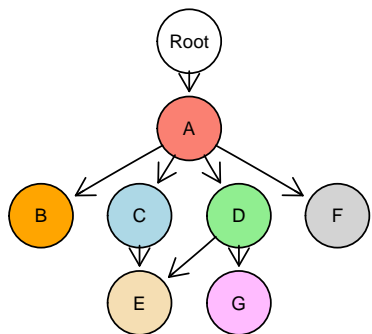

ID **upEZISo6oFVQcSEK**  
 acc genotypes **33**  
 peaks no back **6**  
 removed edges **10**  
 prop rem edges **0.137**

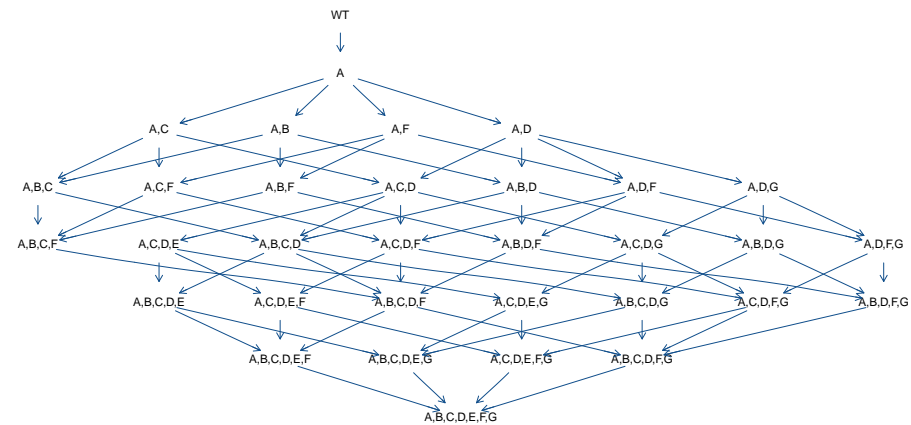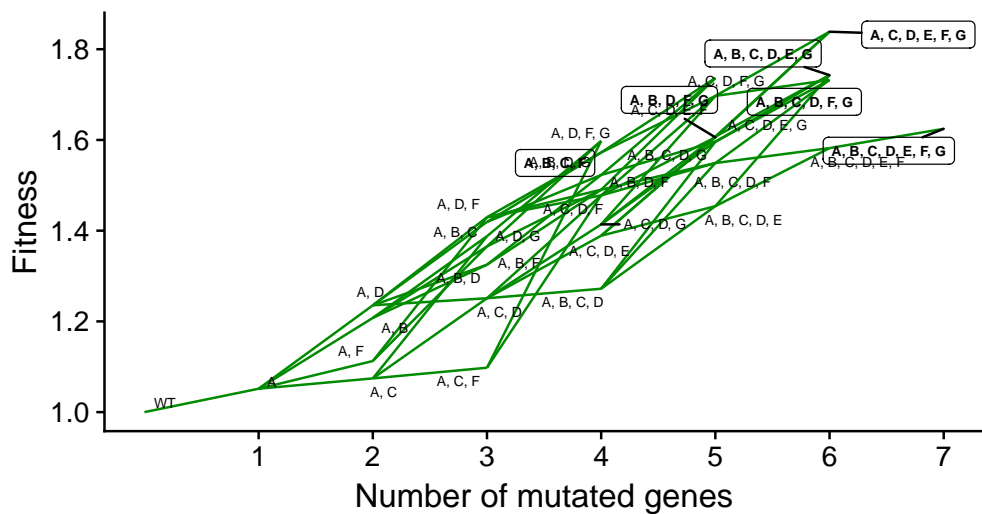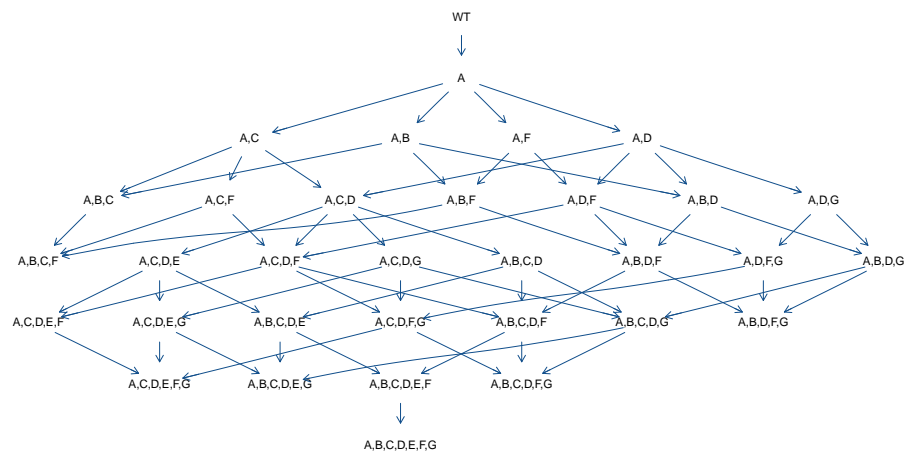

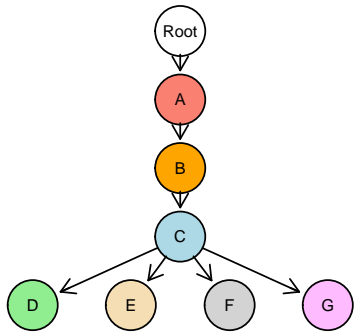

ID **UQu5n10aPzWHnGf59**  
 acc genotypes **19**  
 peaks no back **5**  
 removed edges **6**  
 prop rem edges **0.171**

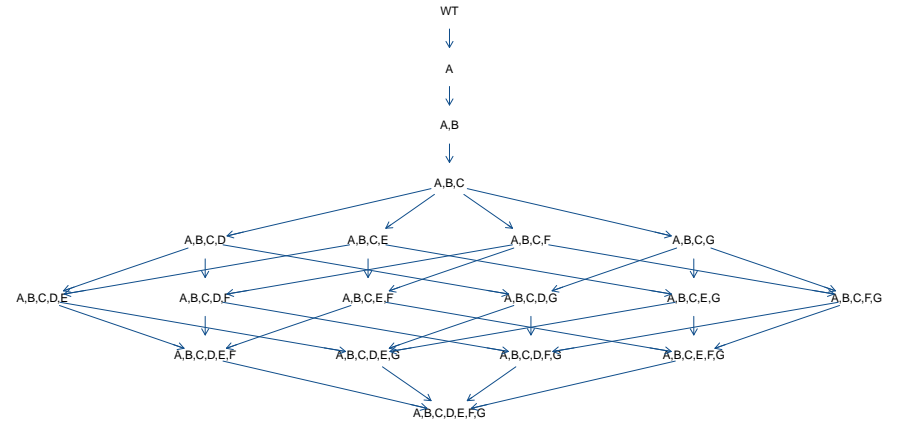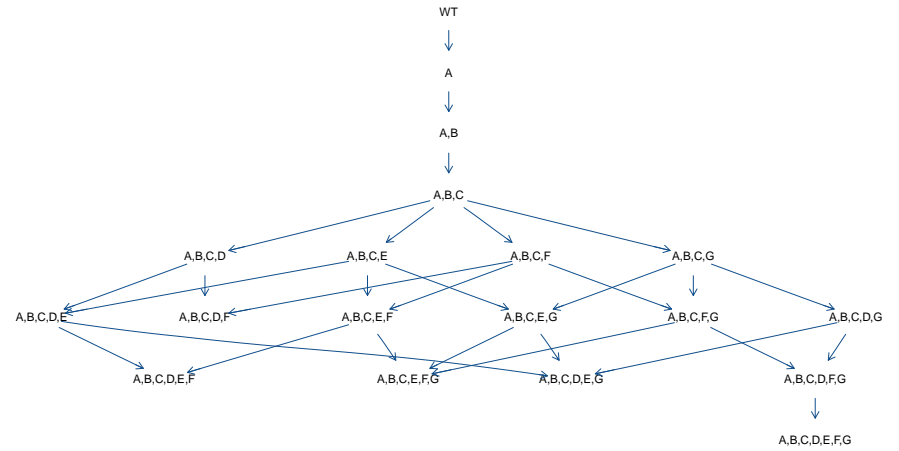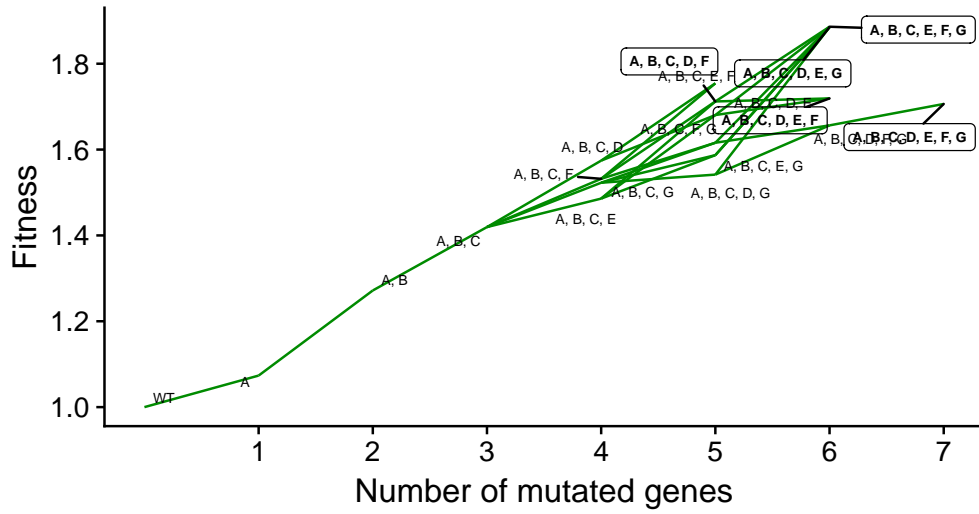

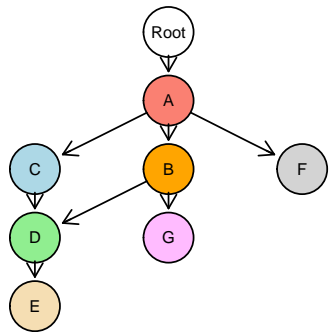

ID **uw7YHXhohAPISHwZ**  
 acc genotypes **21**  
 peaks no back **2**  
 removed edges **8**  
 prop rem edges **0.216**

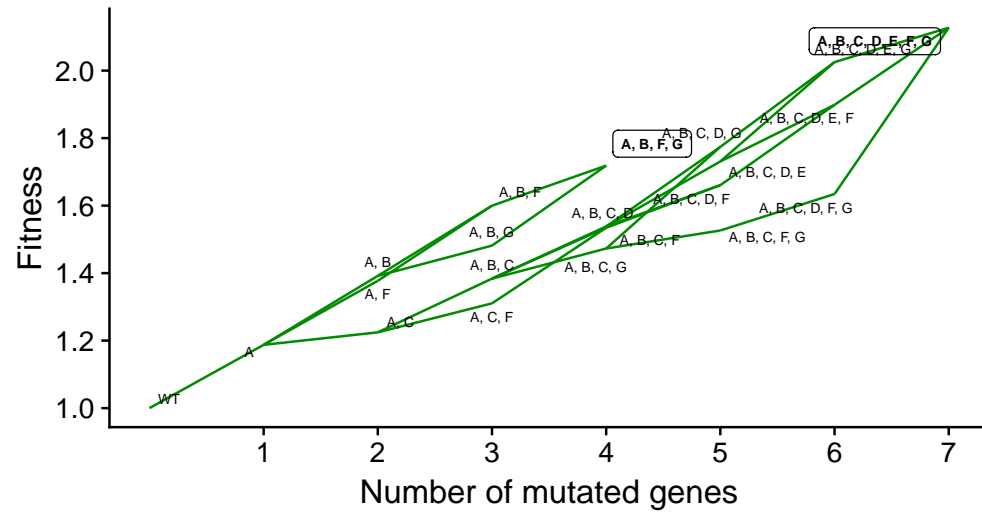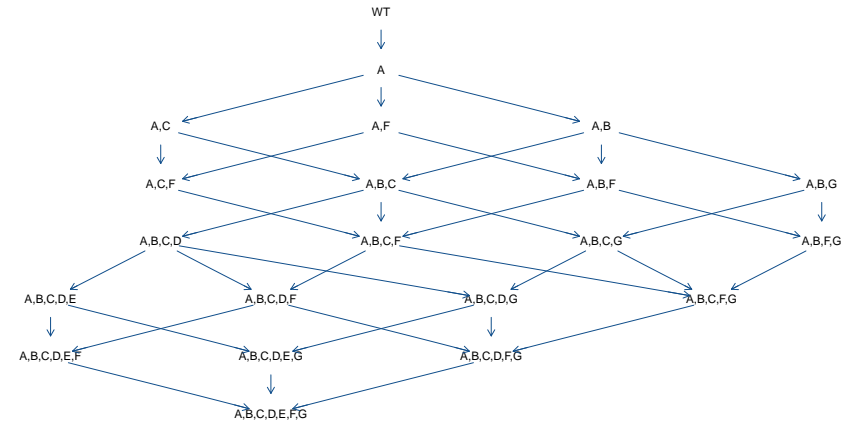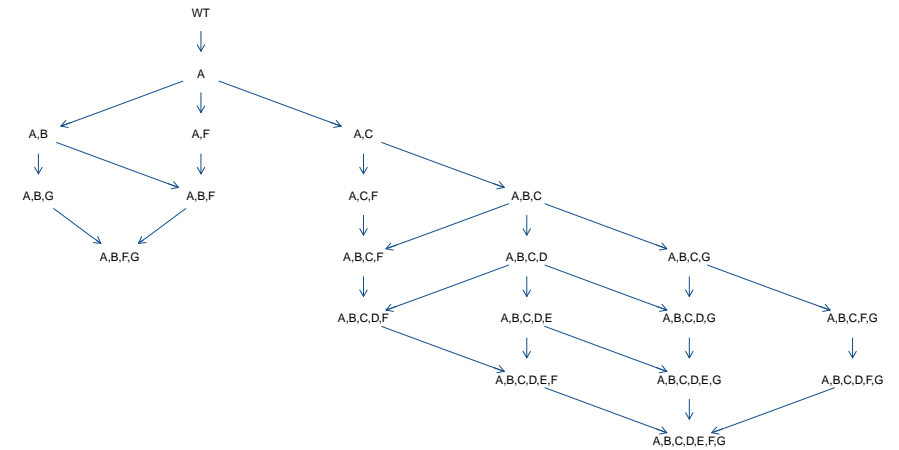

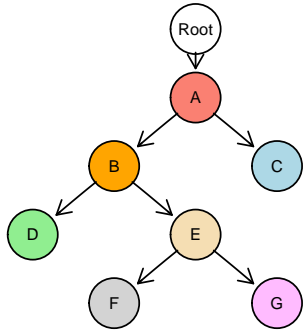

ID V4JKndnKWM310nITX  
 acc genotypes 23  
 peaks no back 4  
 removed edges 5  
 prop rem edges 0.114

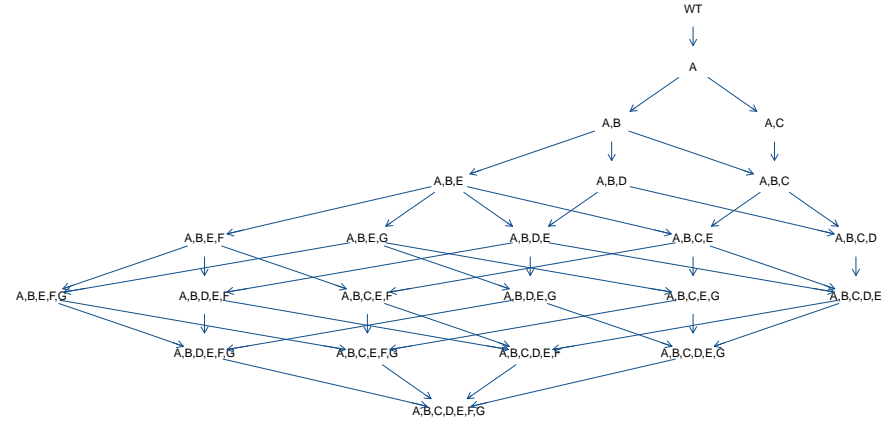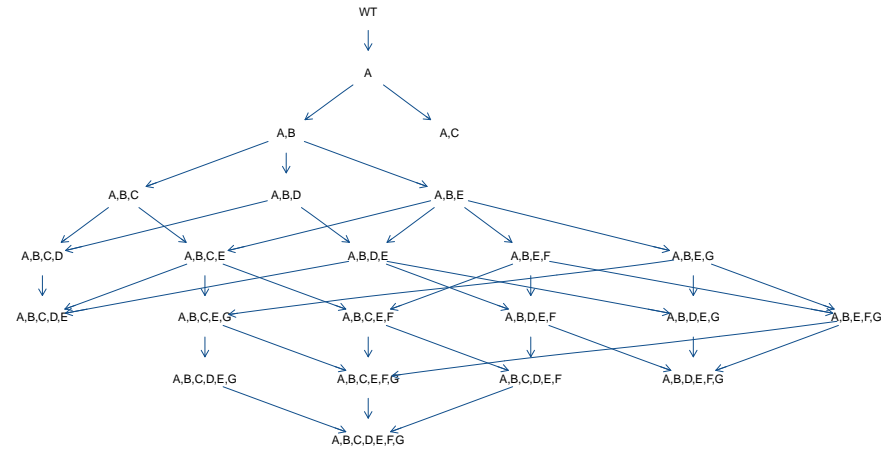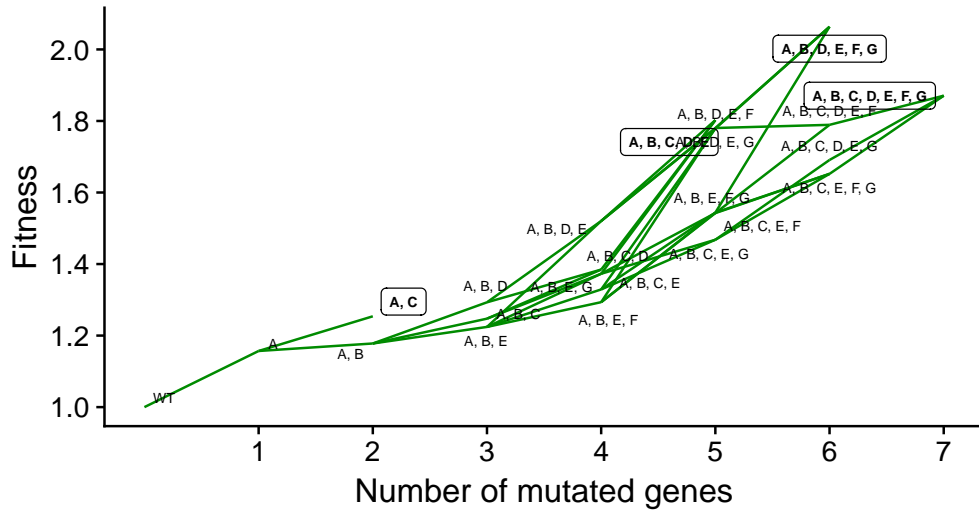

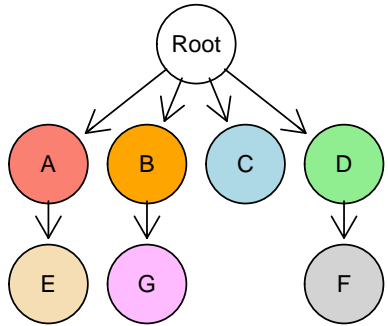

ID V4TR5vUVdRPVwMm  
 acc genotypes 54  
 peaks no back 8  
 removed edges 24  
 prop rem edges 0.178

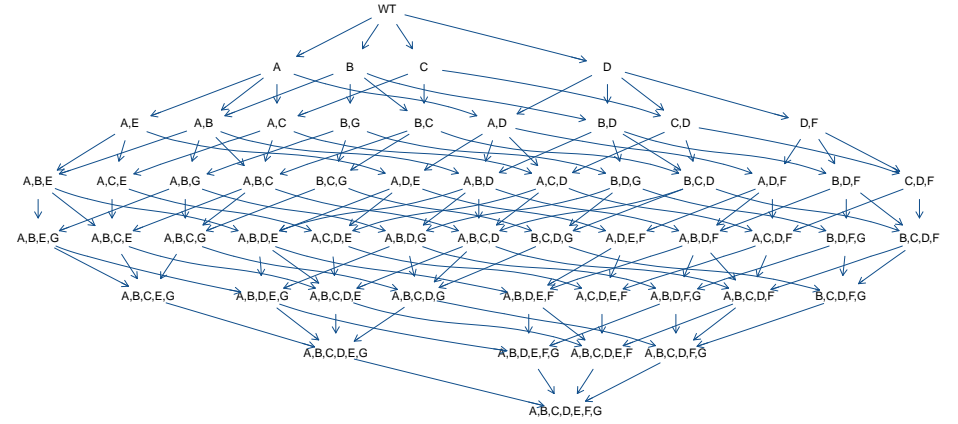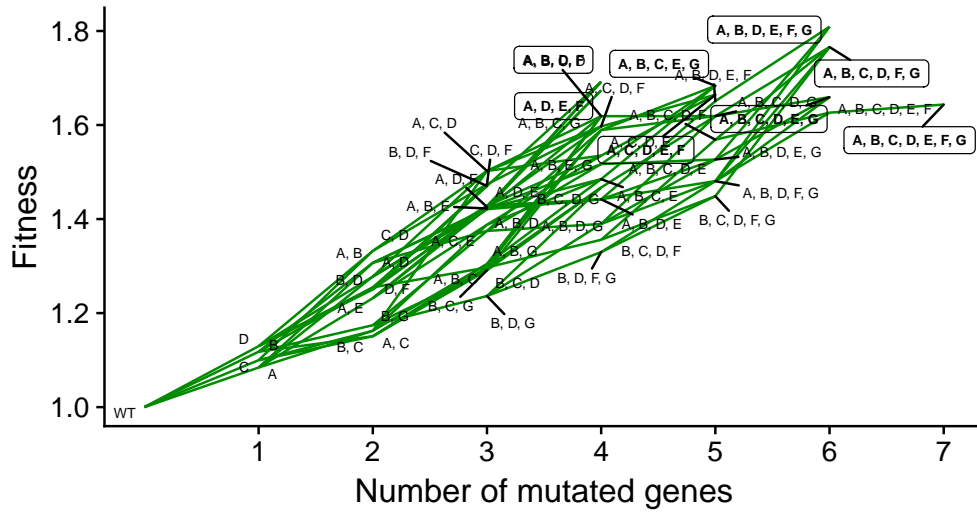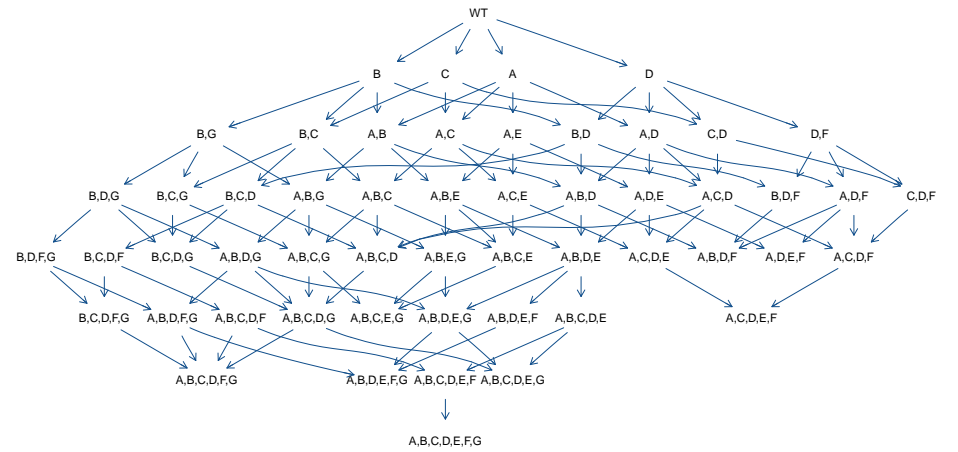

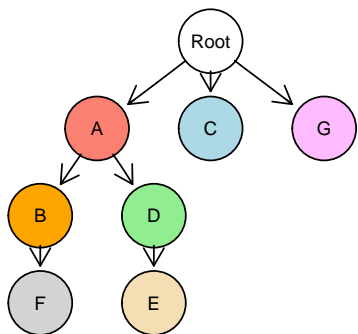

ID vDqUv4dtGloB94NH  
 acc genotypes 40  
 peaks no back 8  
 removed edges 13  
 prop rem edges 0.141

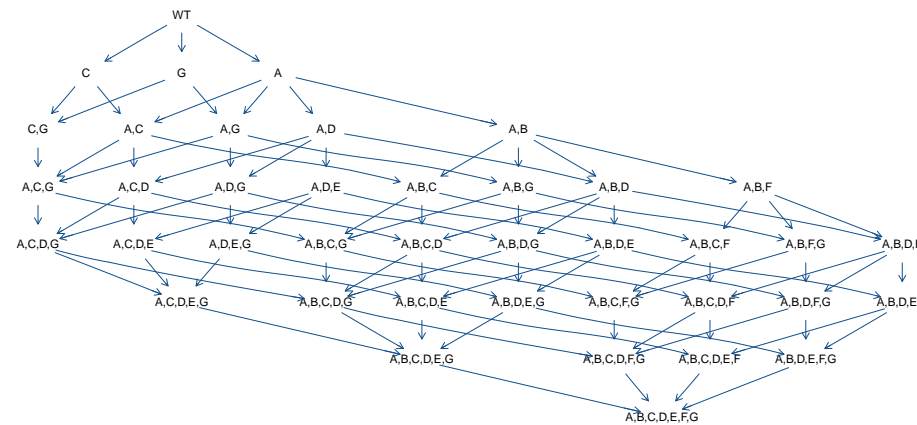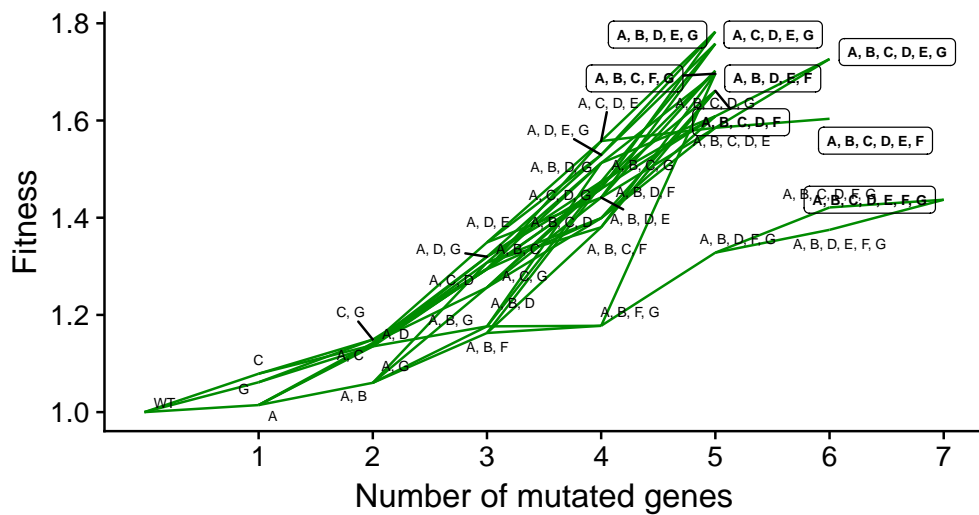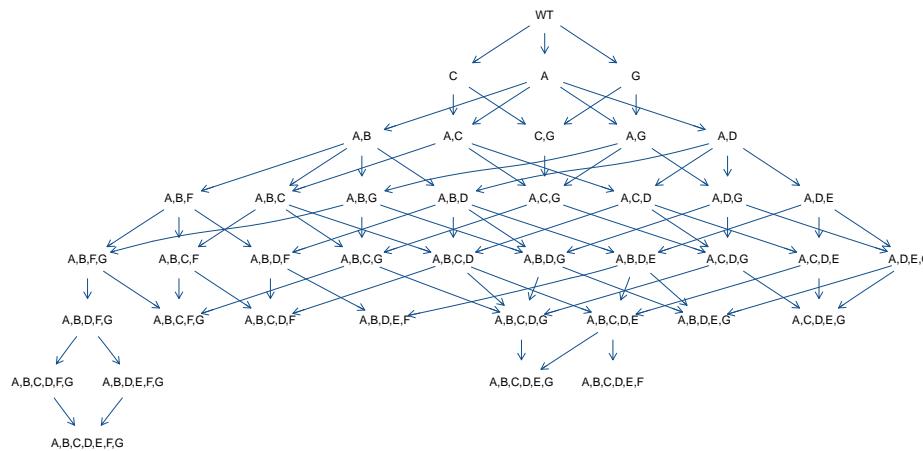

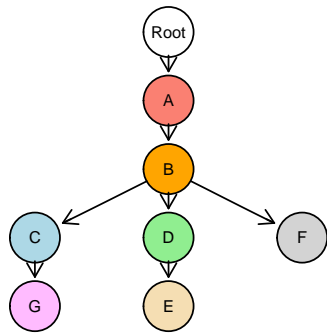

ID [VIFJpVZjq2HKeP6z](#)  
 acc genotypes 20  
 peaks no back 5  
 removed edges 8  
 prop rem edges 0.229

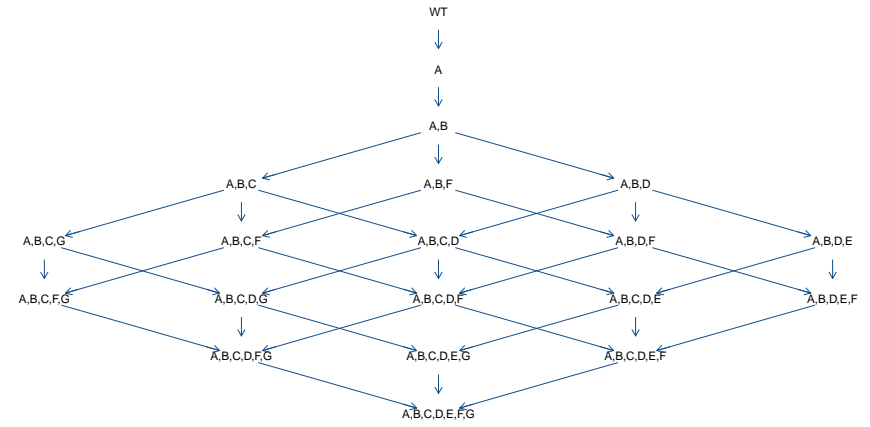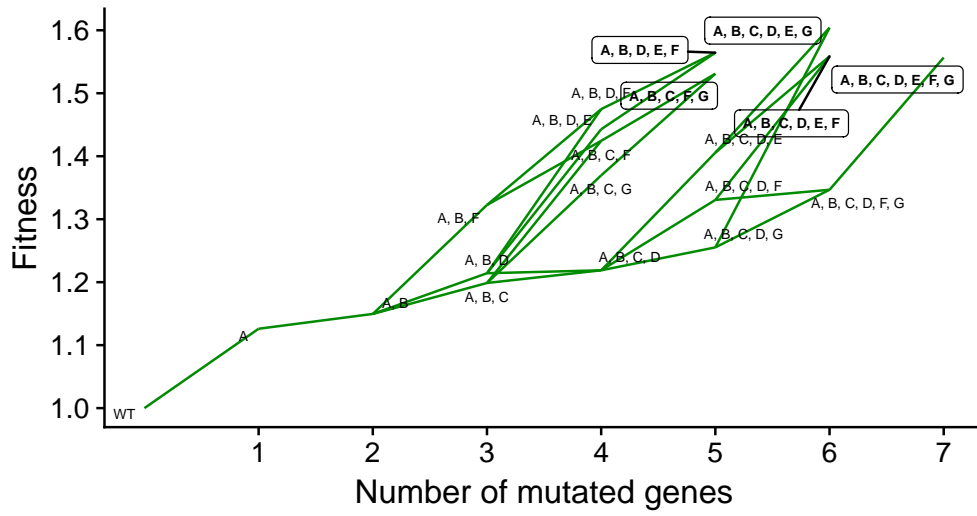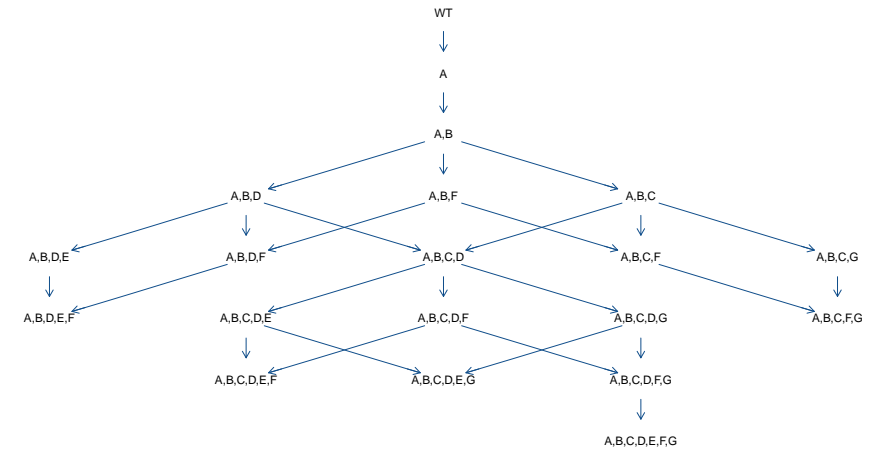



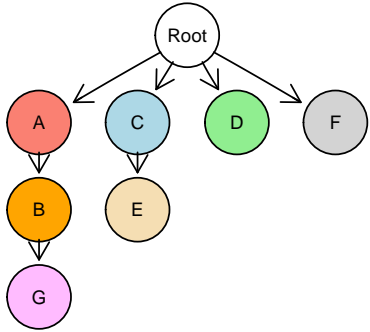

ID vK7dEdwlvdYys5rB  
 acc genotypes 48  
 peaks no back 10  
 removed edges 24  
 prop rem edges 0.207

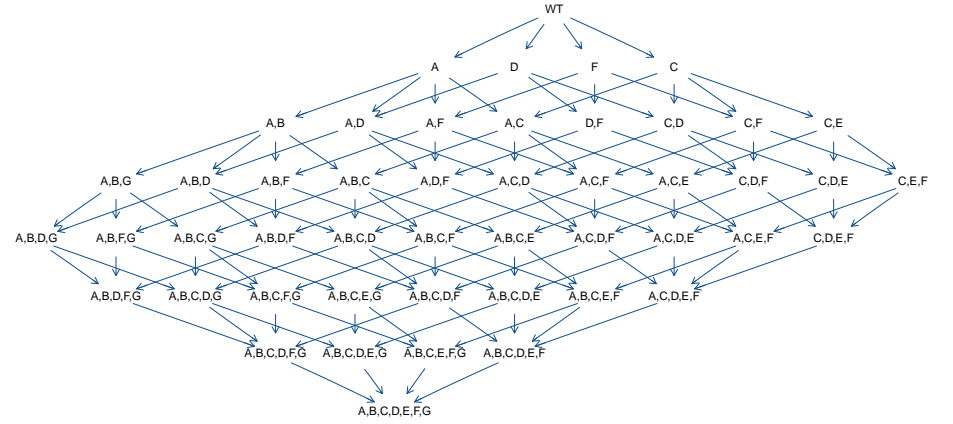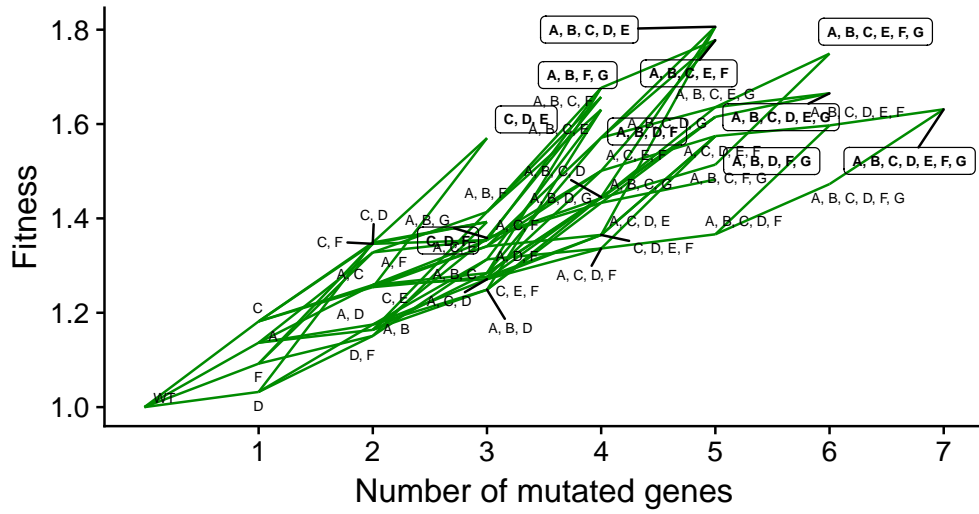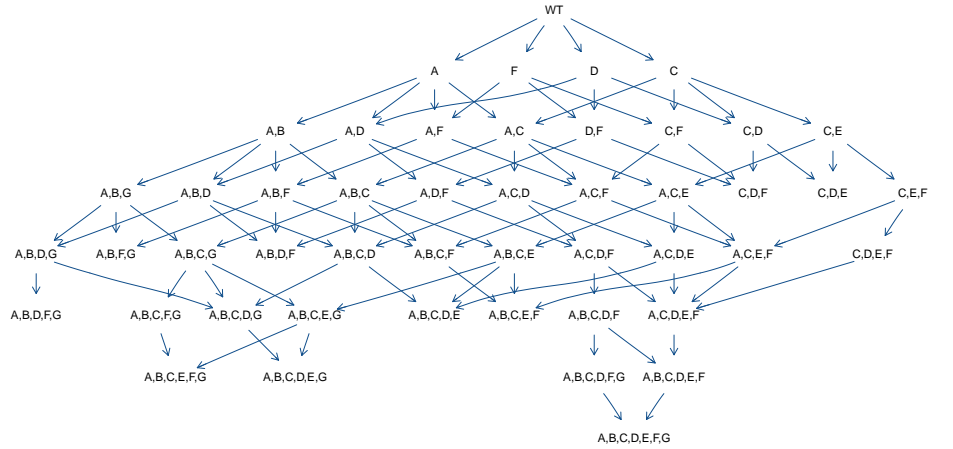

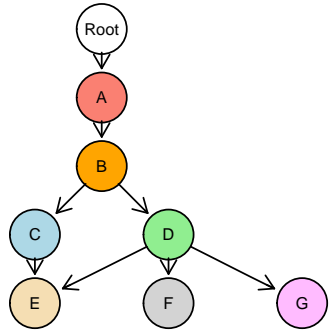

ID VqVZdFELXTXwJzx10  
 acc genotypes 16  
 peaks no back 3  
 removed edges 2  
 prop rem edges 0.08

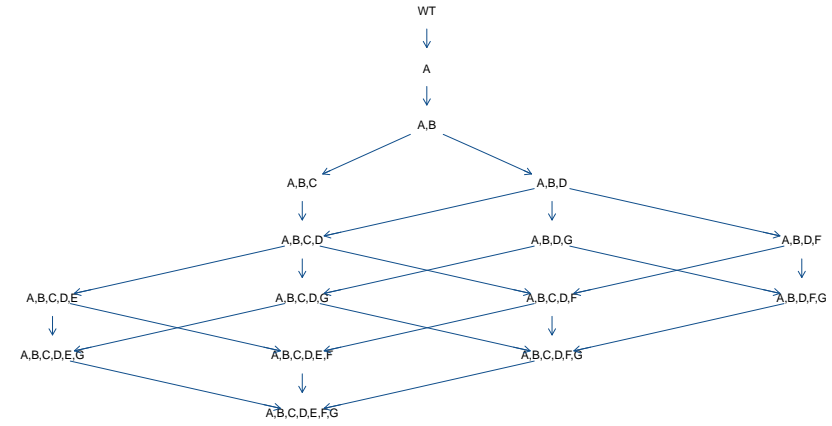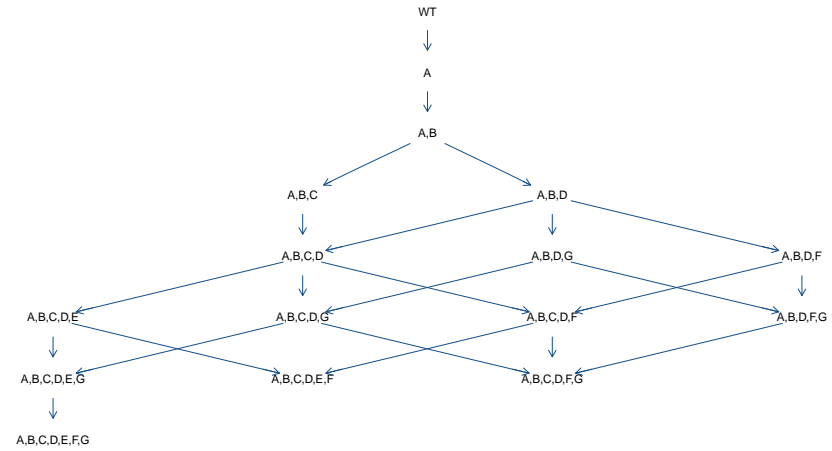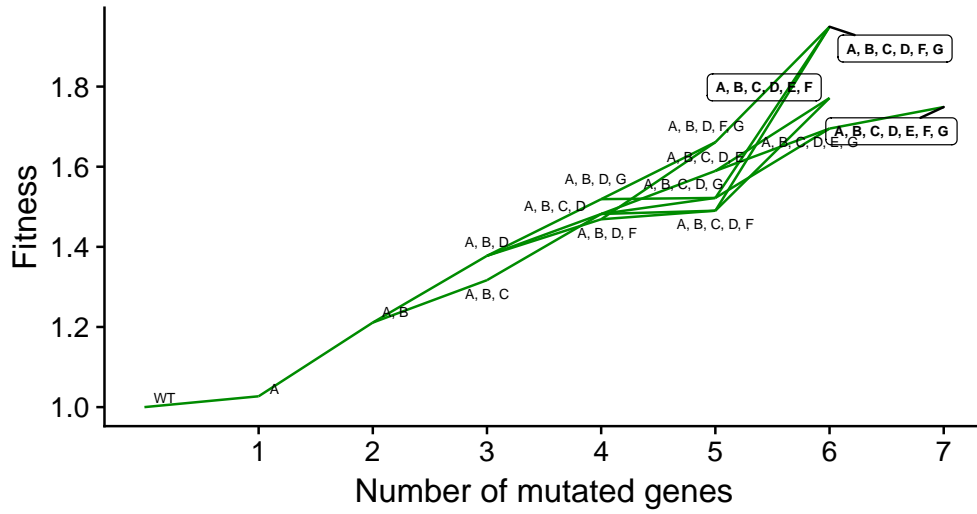



ID [vwiAaqQVbYrKTtxK](#)  
 acc genotypes 28  
 peaks no back 7  
 removed edges 12  
 prop rem edges 0.218

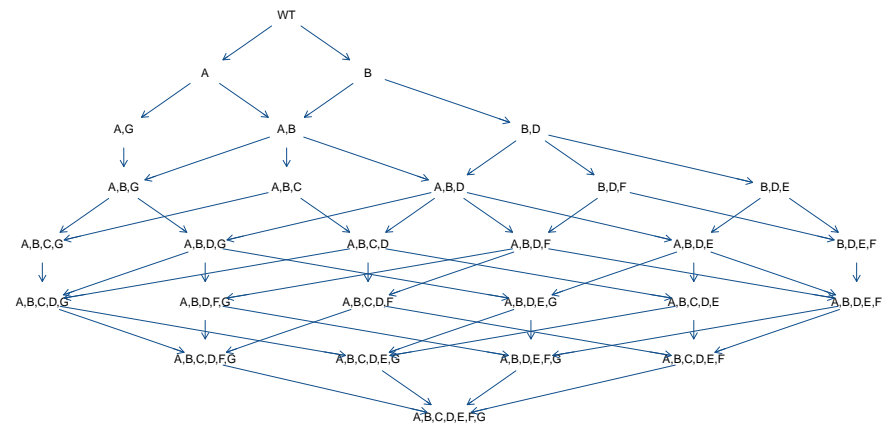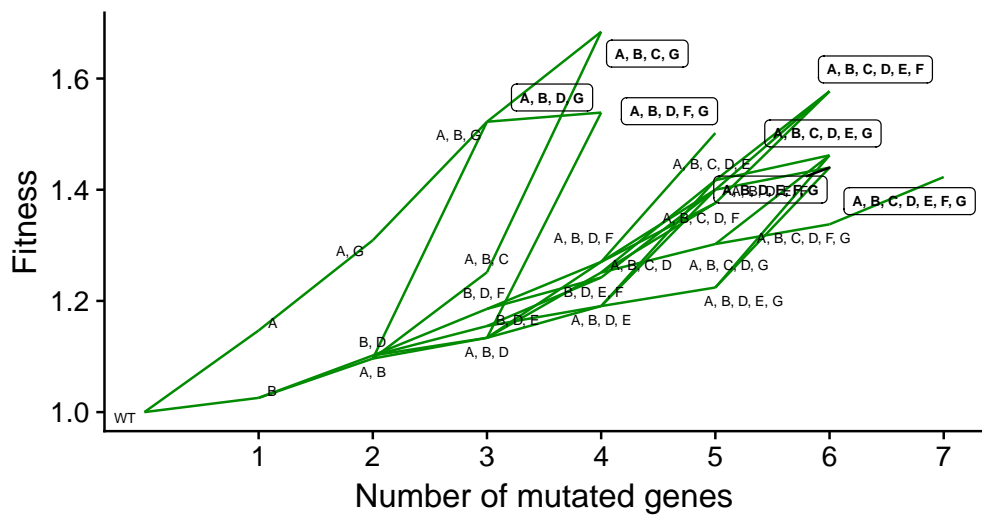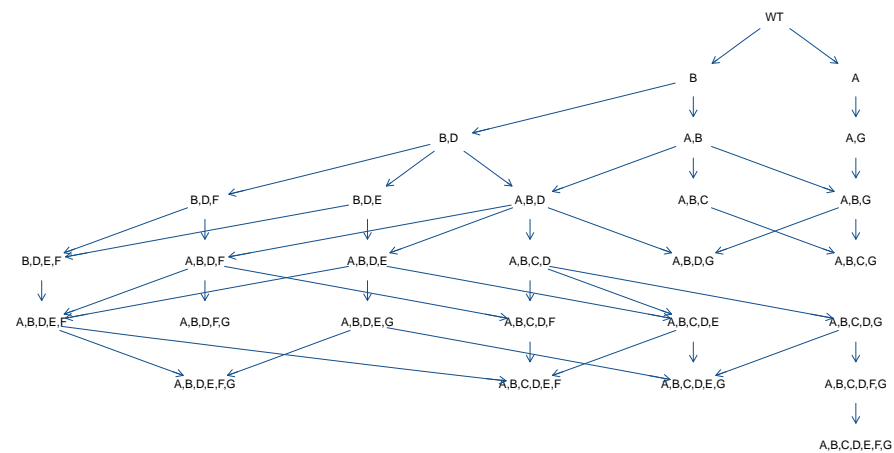

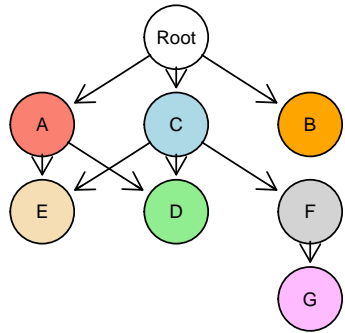

ID VYKTwc6PGOf05RH5  
 acc genotypes 34  
 peaks no back 5  
 removed edges 12  
 prop rem edges 0.164

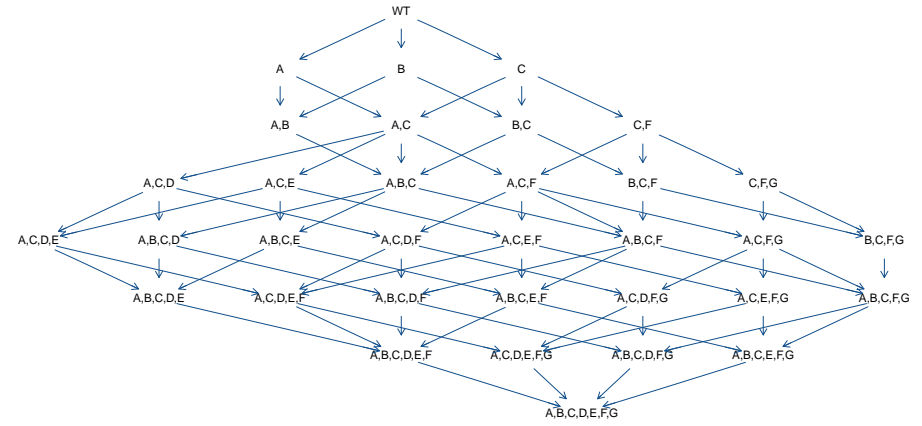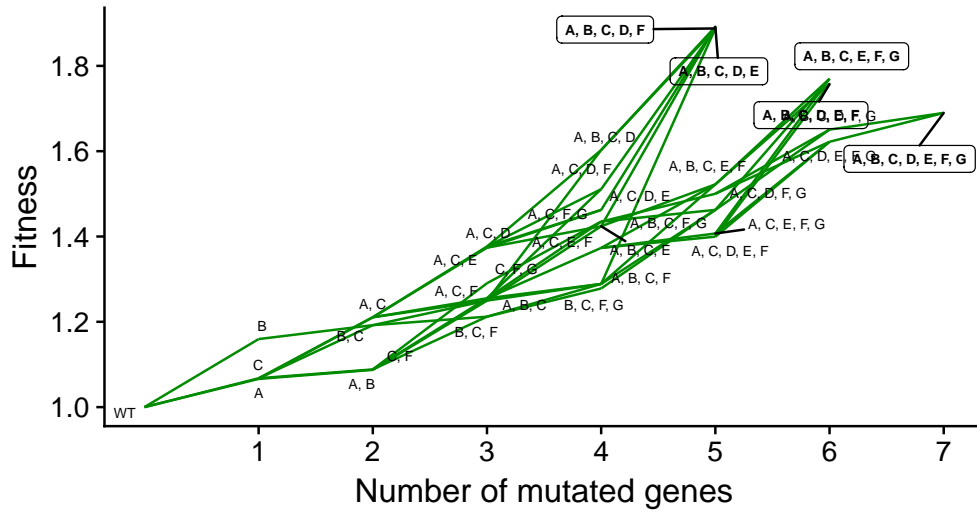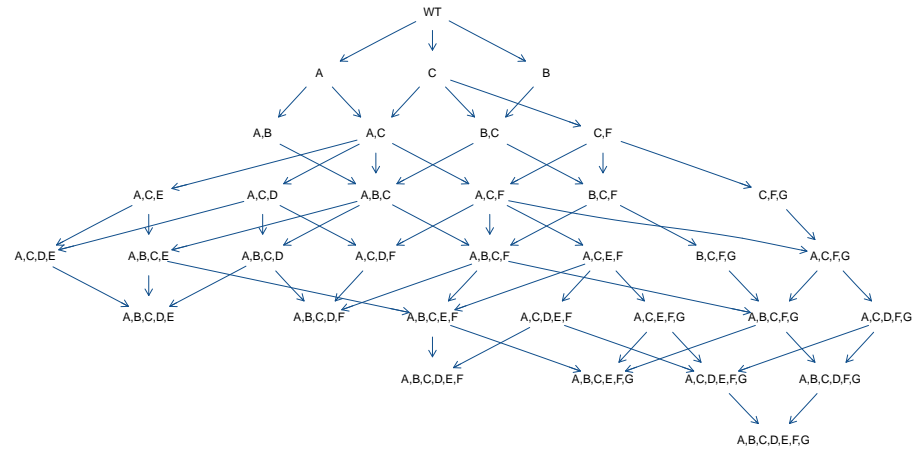

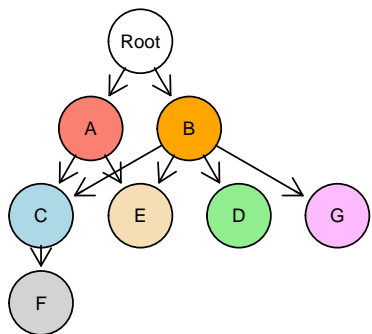

ID **vz7pdw2T4KJ7Ey10T**  
 acc genotypes **30**  
 peaks no back **6**  
 removed edges **14**  
 prop rem edges **0.222**

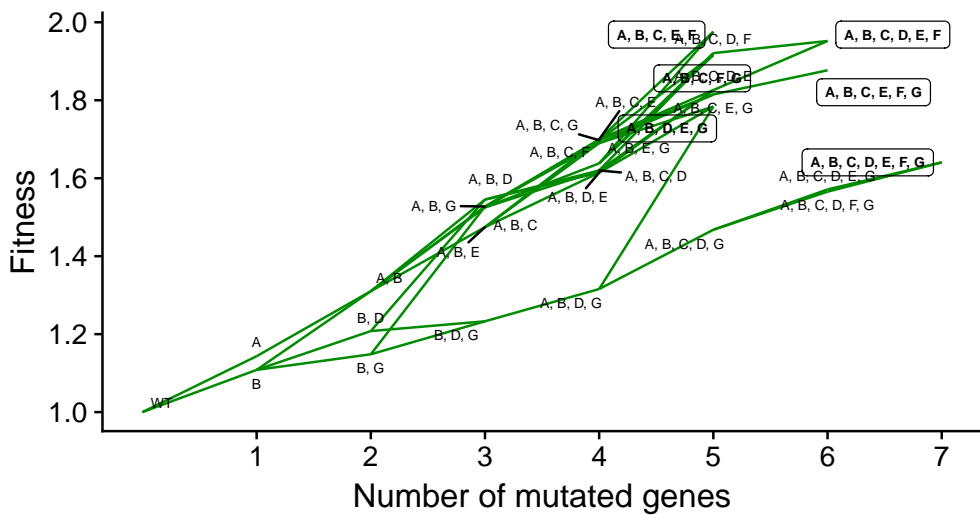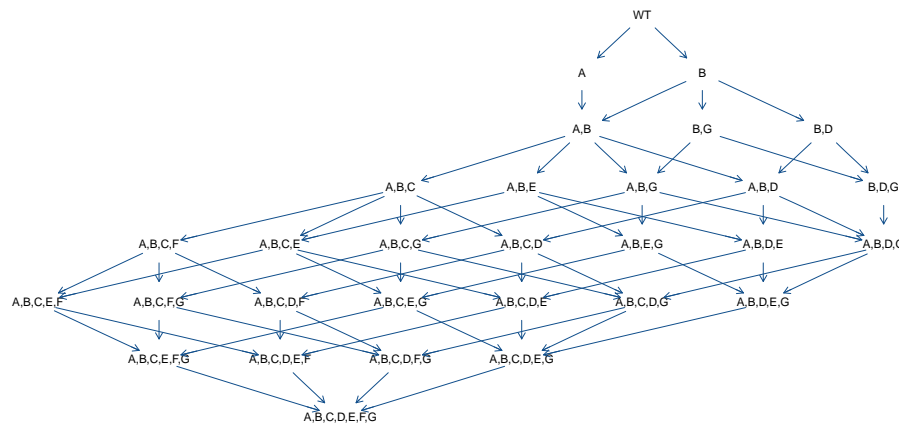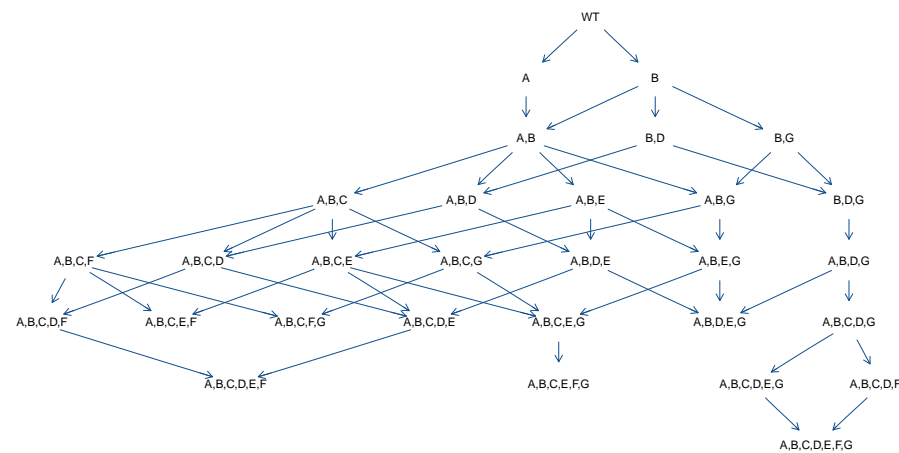



ID **WCthf7pnLrf65210C**  
 acc genotypes **12**  
 peaks no back **2**  
 removed edges **1**  
 prop rem edges **0.067**

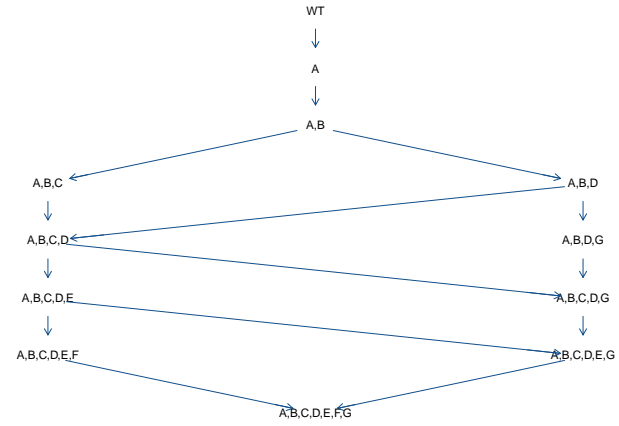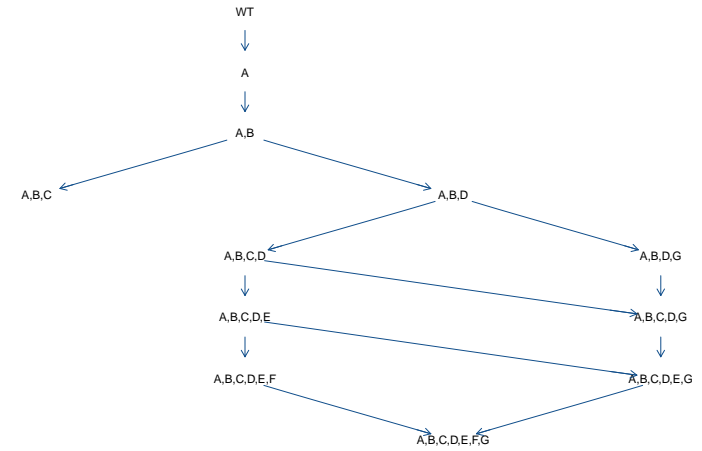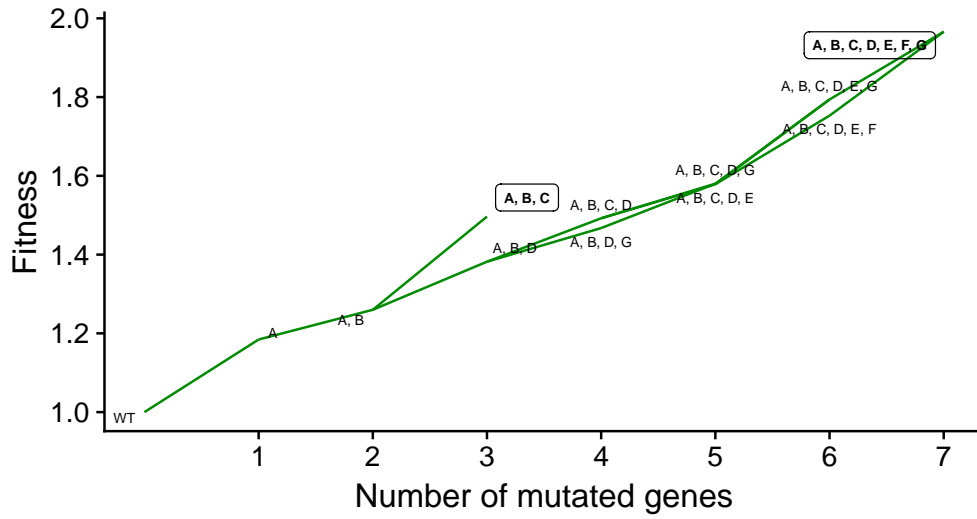

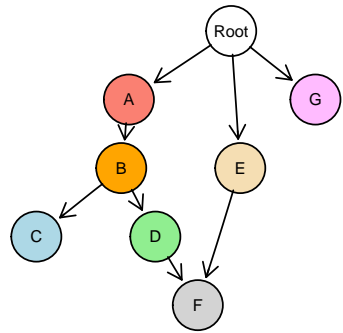

ID **wGM2GvMSYVAE2KwT**  
 acc genotypes **28**  
 peaks no back **6**  
 removed edges **13**  
 prop rem edges **0.232**

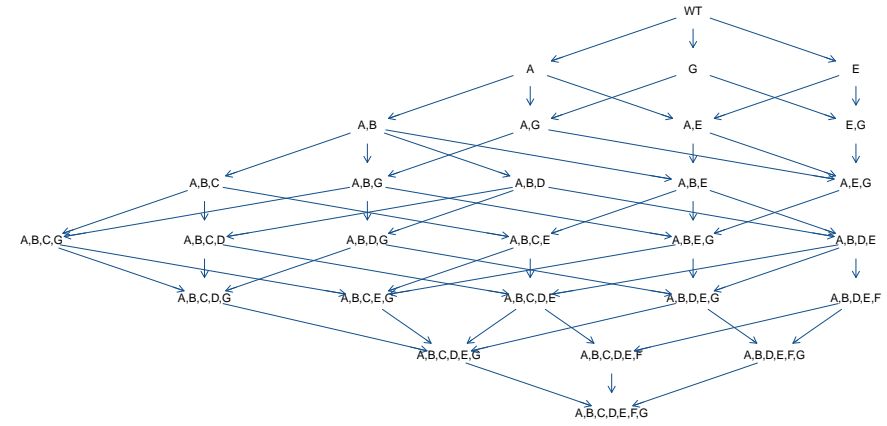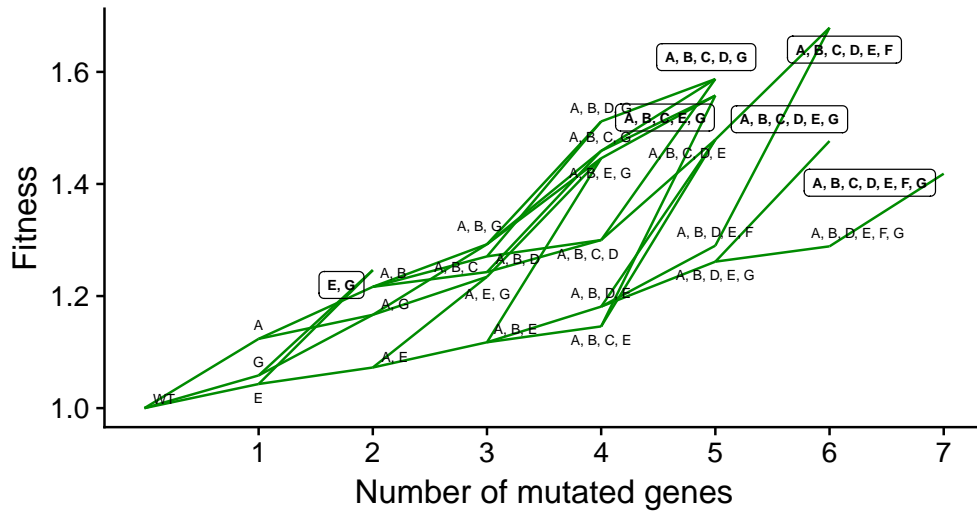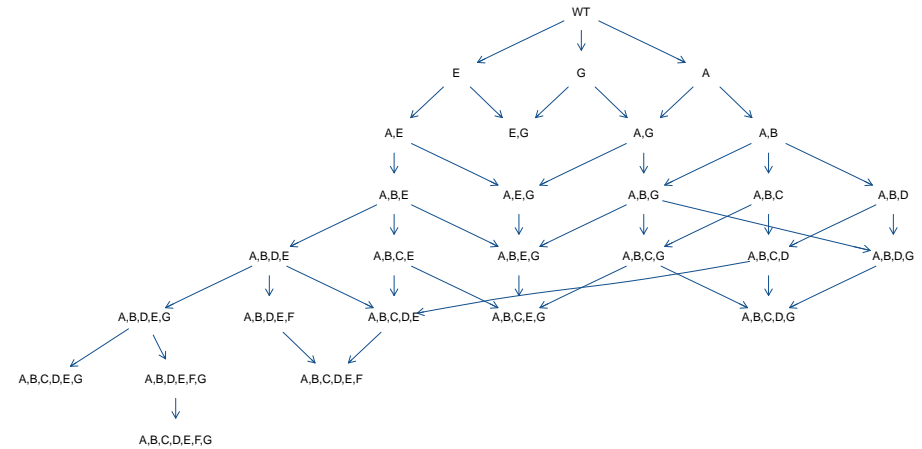

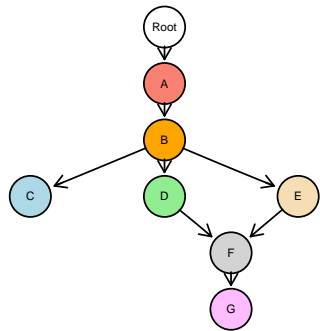

ID WpF105HbEDoECa8vs  
 acc genotypes 14  
 peaks no back 2  
 removed edges 1  
 prop rem edges 0.05

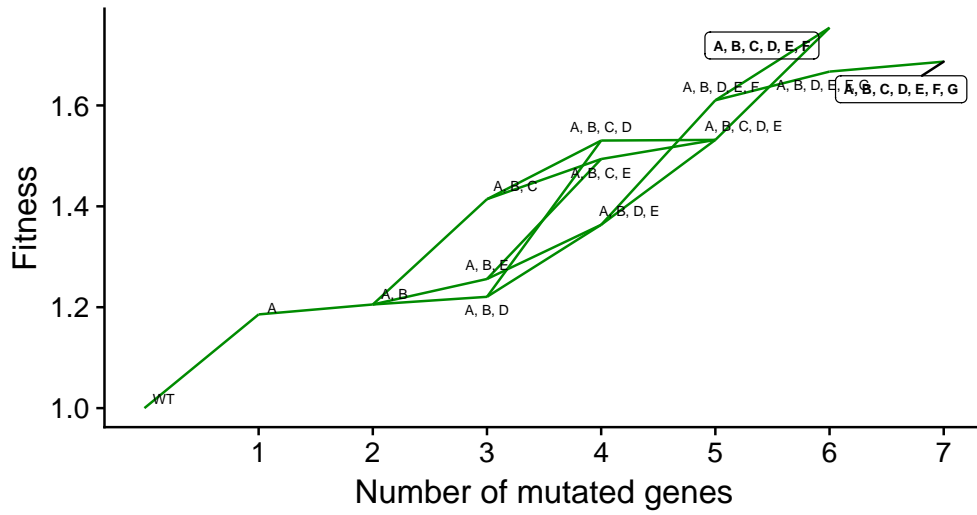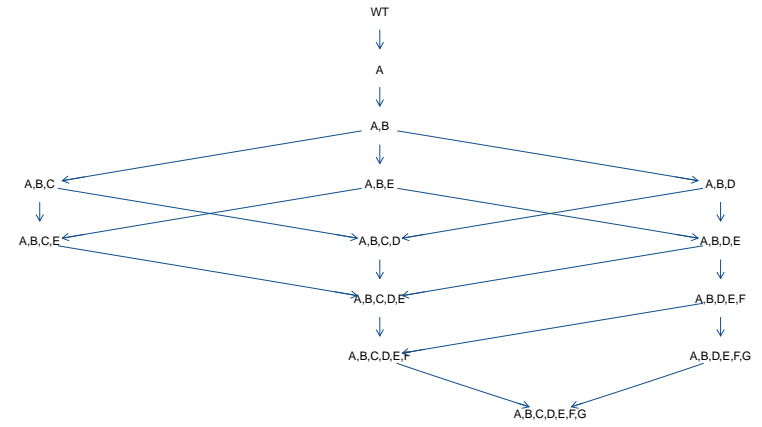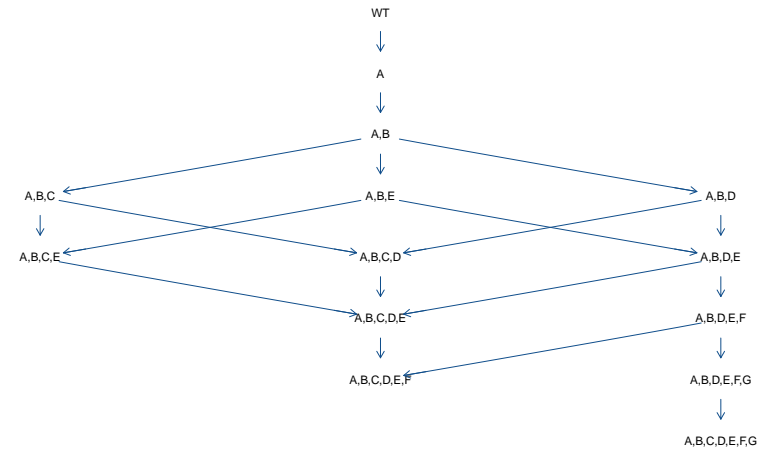



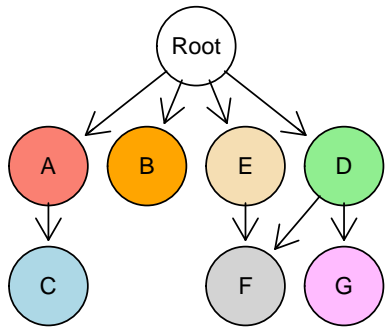

ID Wv6VdQ7KvmRODig4  
 acc genotypes 48  
 peaks no back 7  
 removed edges 17  
 prop rem edges 0.147

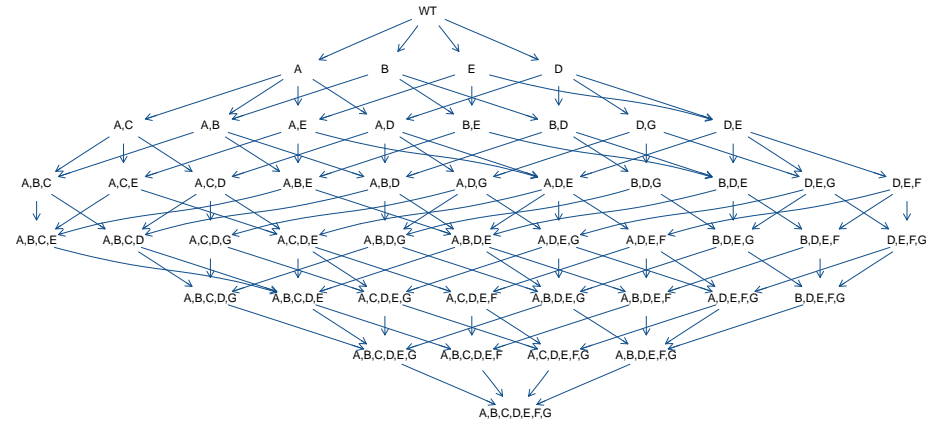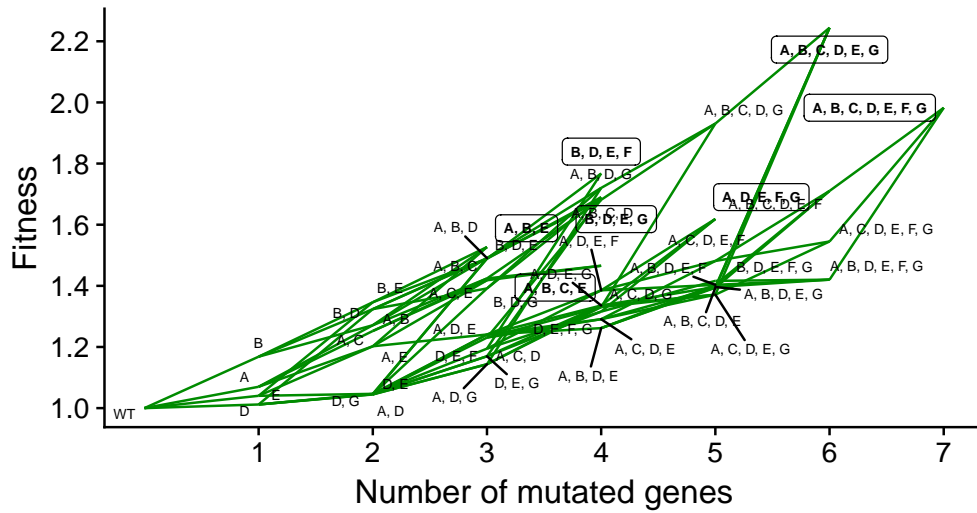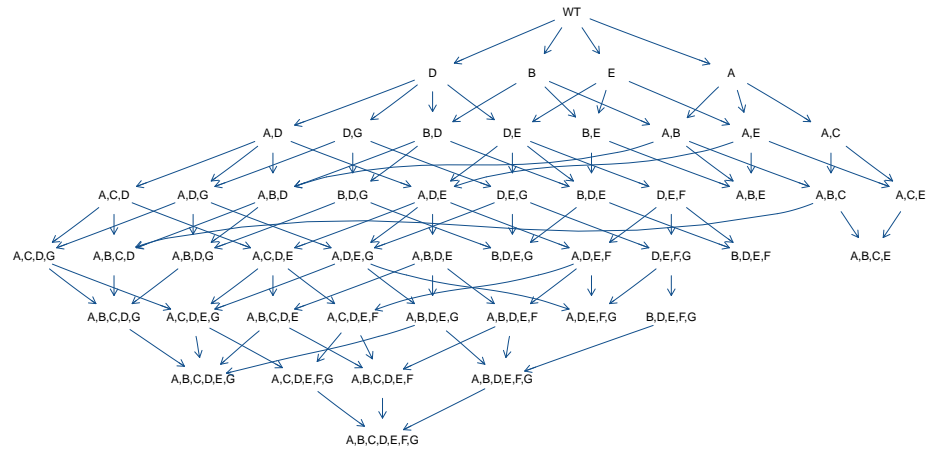

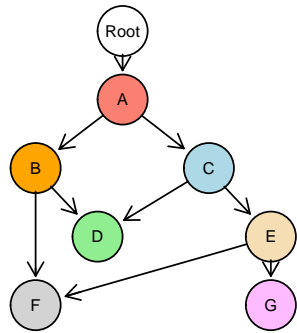

ID **wXZP1BcX68smcT7W**  
 acc genotypes **16**  
 peaks no back **4**  
 removed edges **4**  
 prop rem edges **0.167**

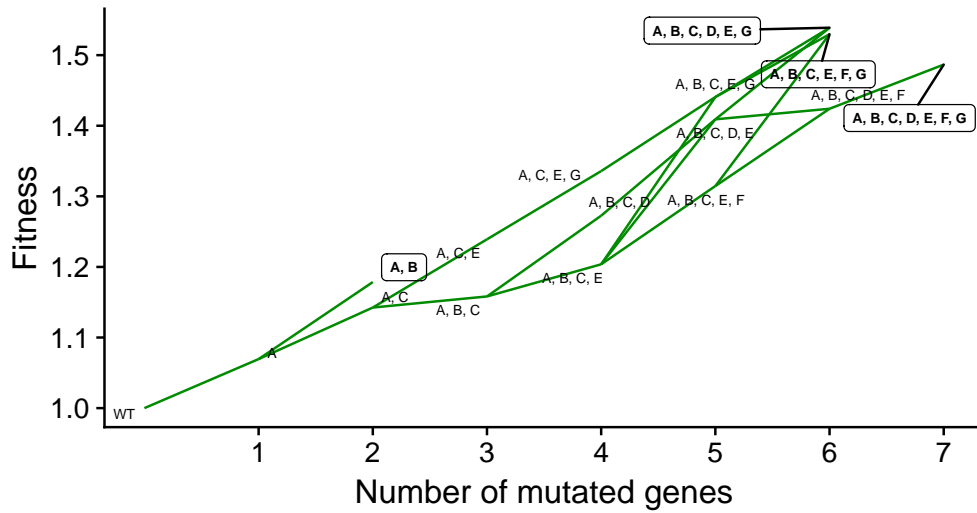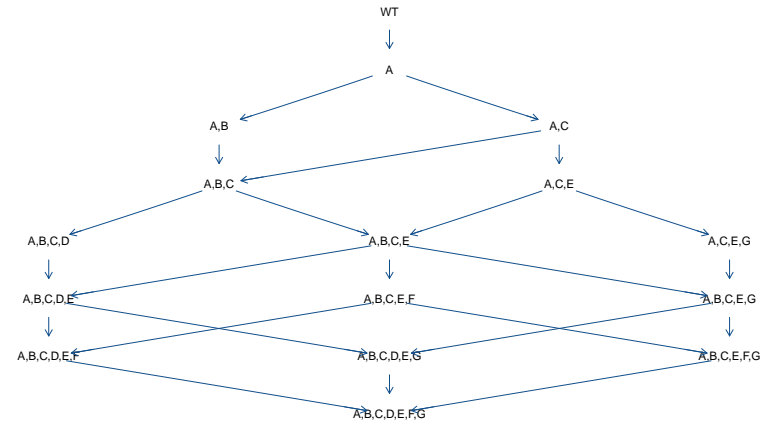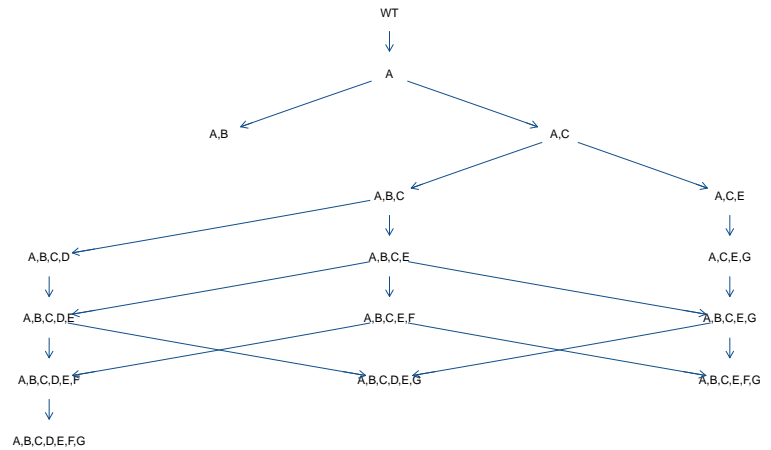

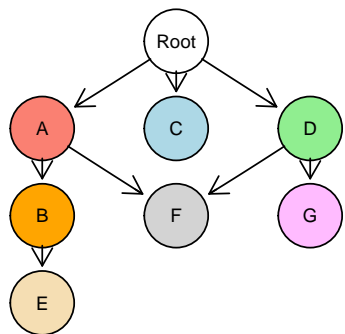

ID WzbE1eRFpacNCxU  
 acc genotypes 36  
 peaks no back 6  
 removed edges 14  
 prop rem edges 0.179

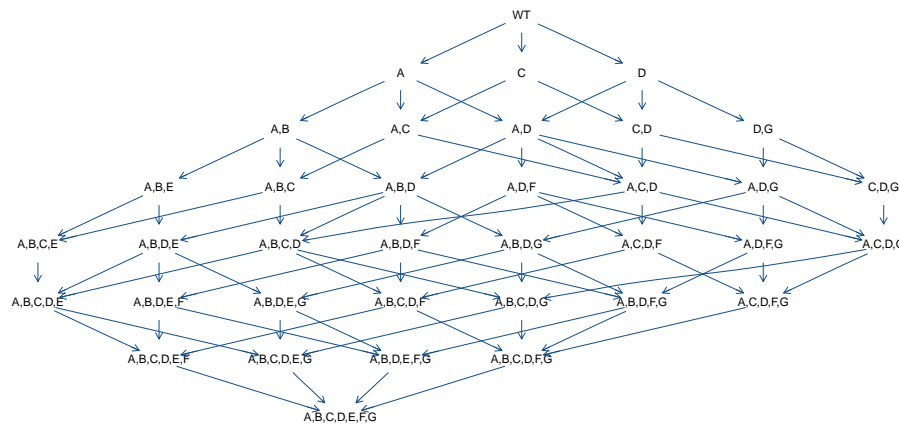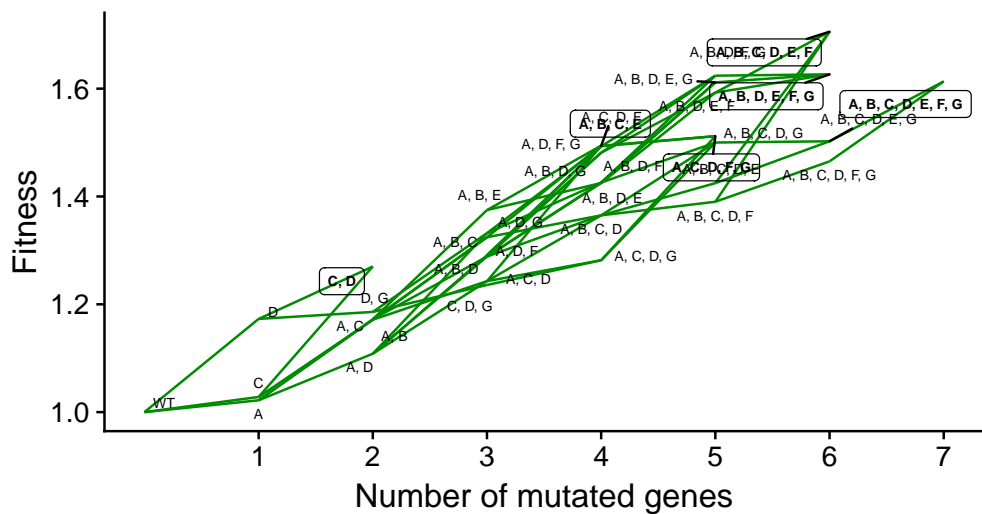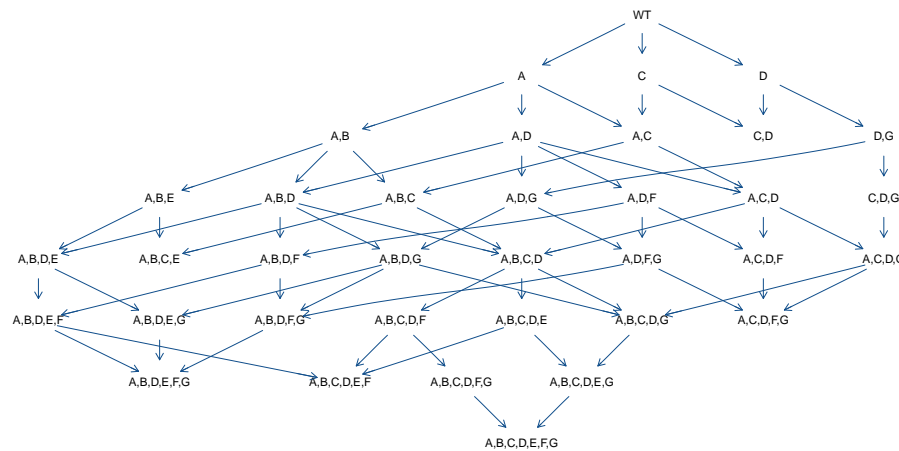

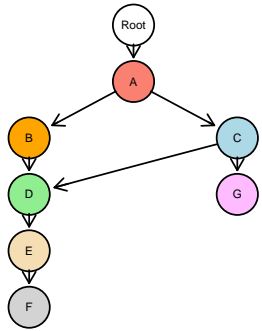

ID wzBFbd7oN5KHrdR  
 acc genotypes 13  
 peaks no back 2  
 removed edges 1  
 prop rem edges 0.059

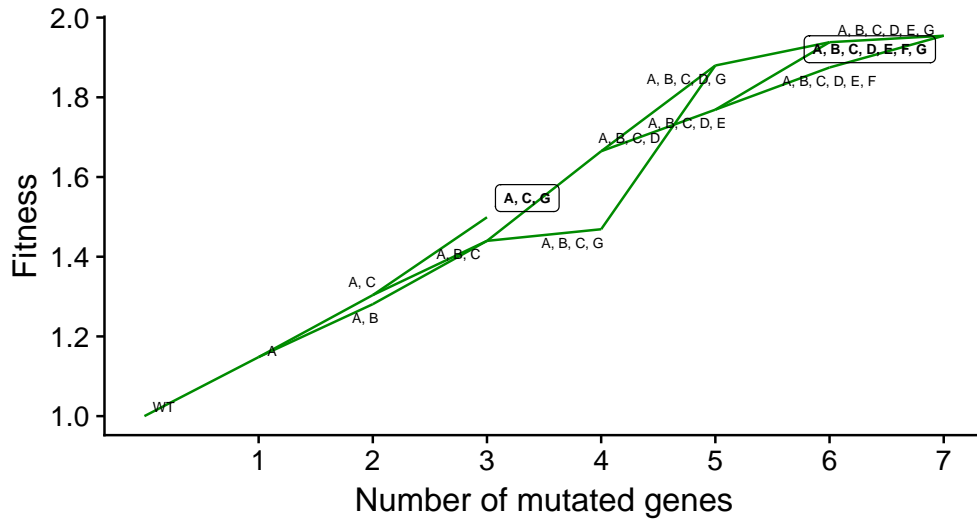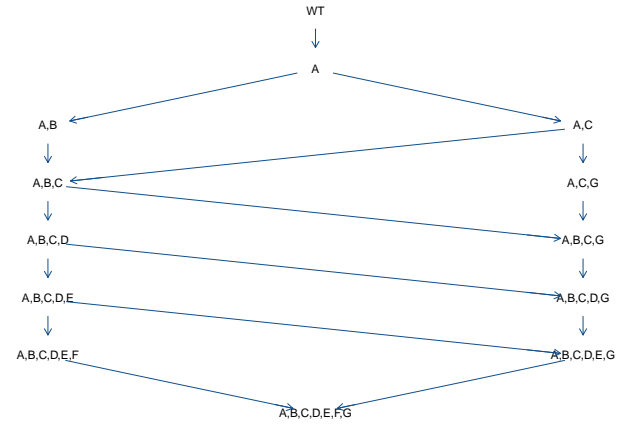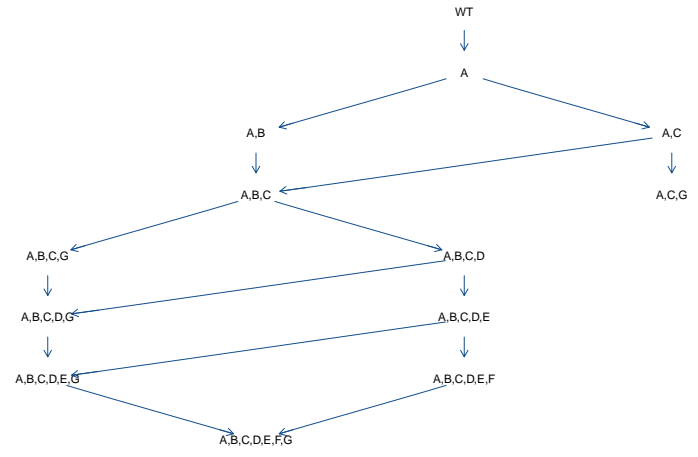

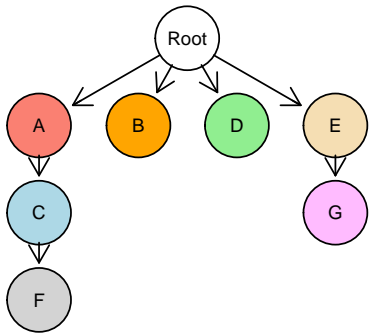

ID X10HPXEjtf2hUa711  
 acc genotypes 48  
 peaks no back 9  
 removed edges 27  
 prop rem edges 0.233

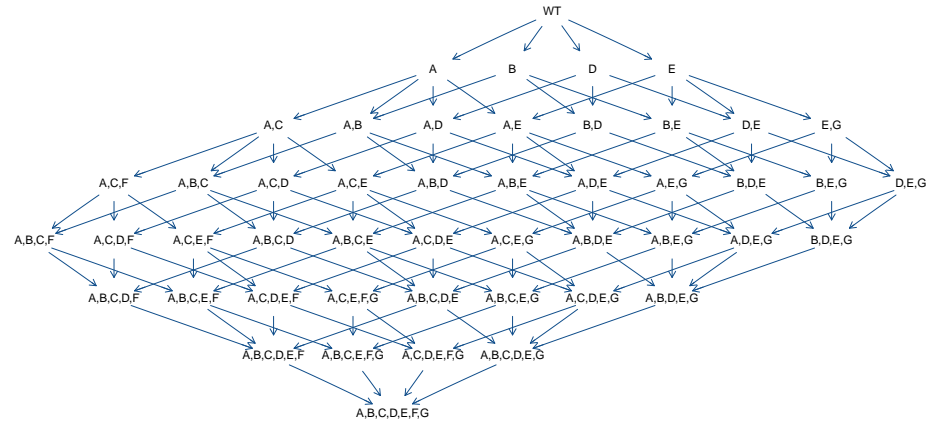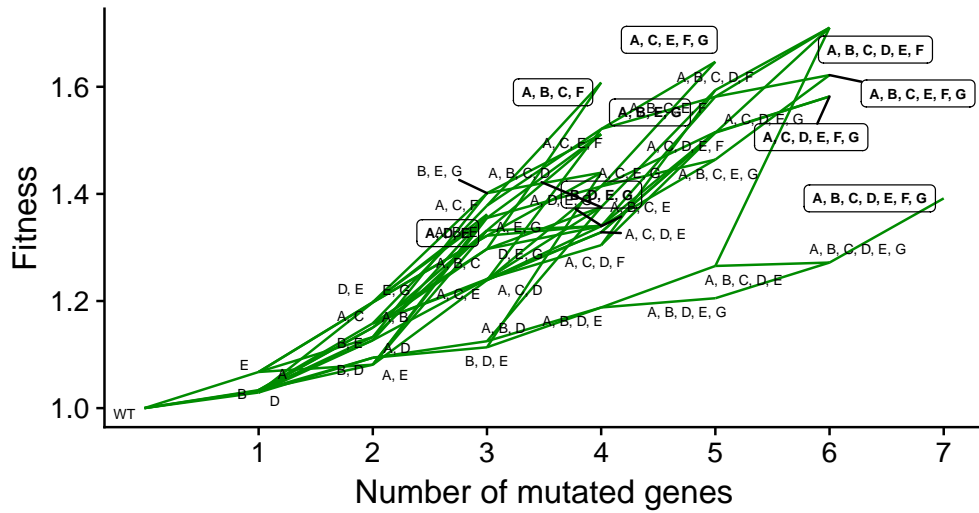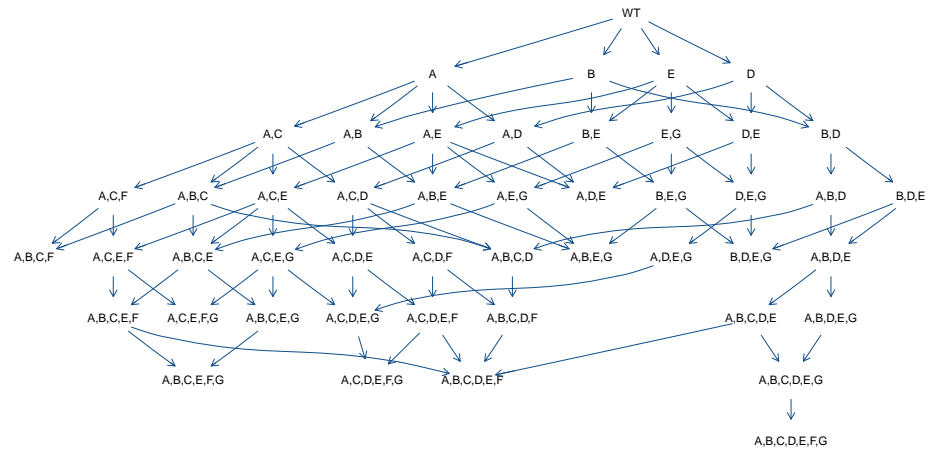

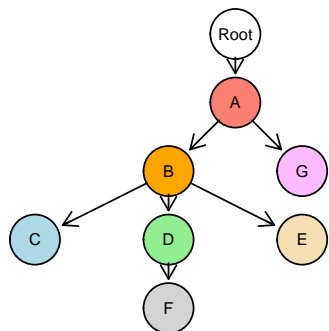

ID **x2Dh5bR5ksqmvSQp**  
 acc genotypes **27**  
 peaks no back **5**  
 removed edges **14**  
 prop rem edges **0.25**

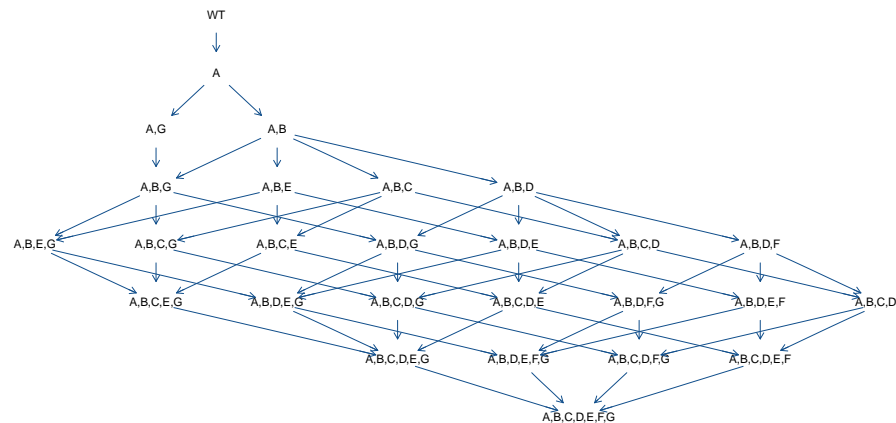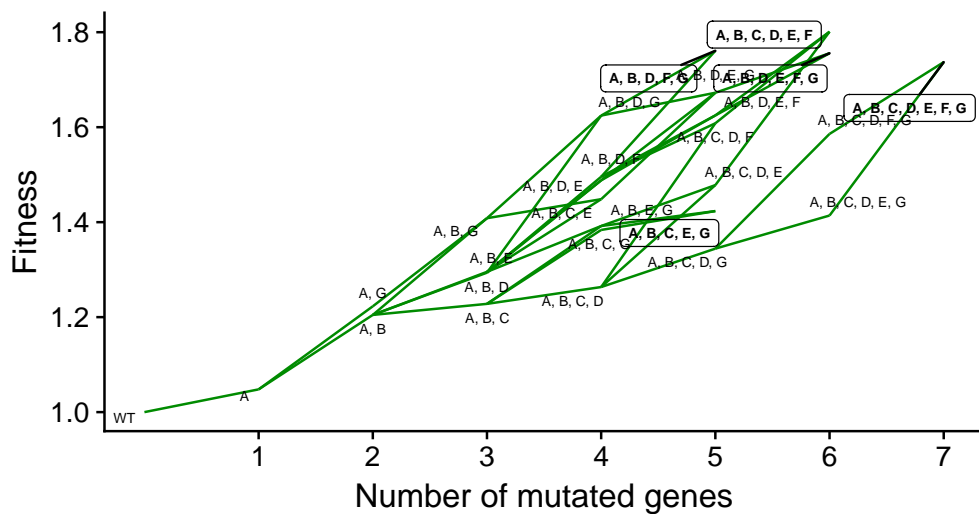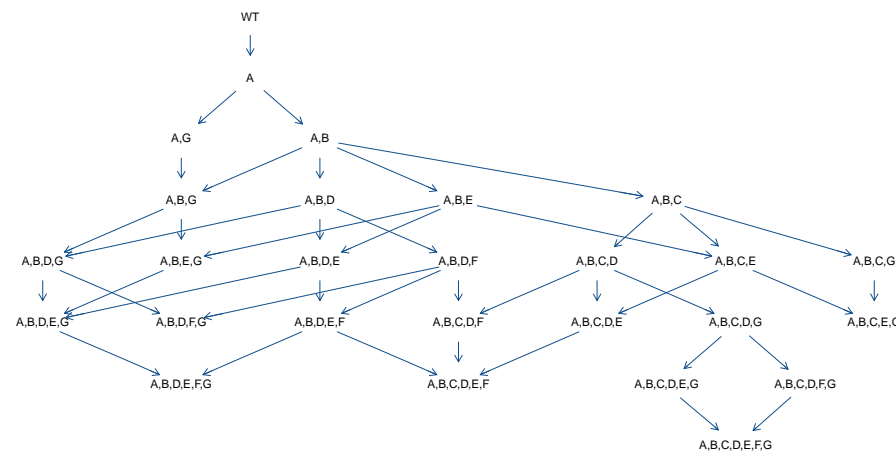

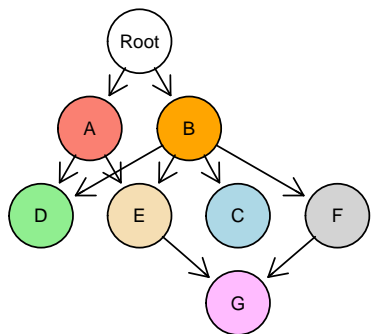

ID XkAnRfxPG4FT103ju  
 acc genotypes 26  
 peaks no back 6  
 removed edges 12  
 prop rem edges 0.235

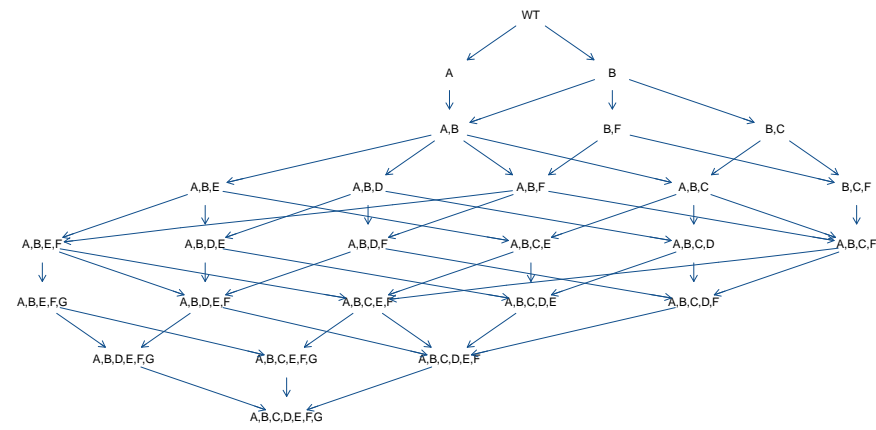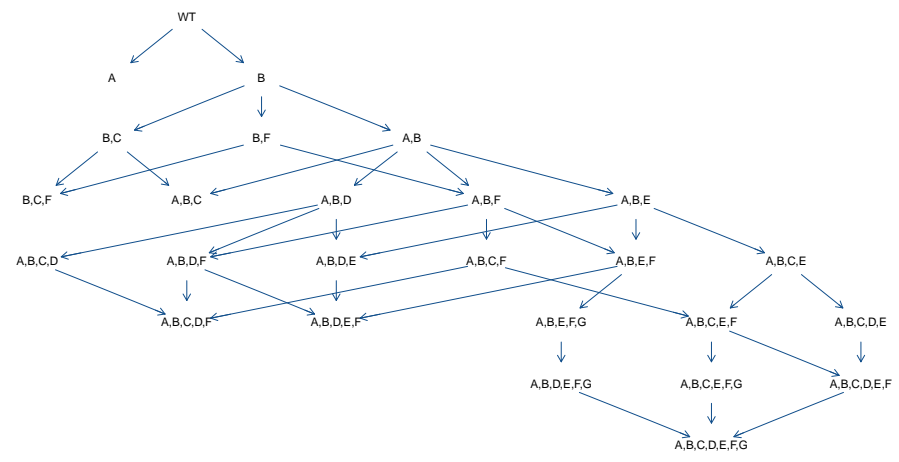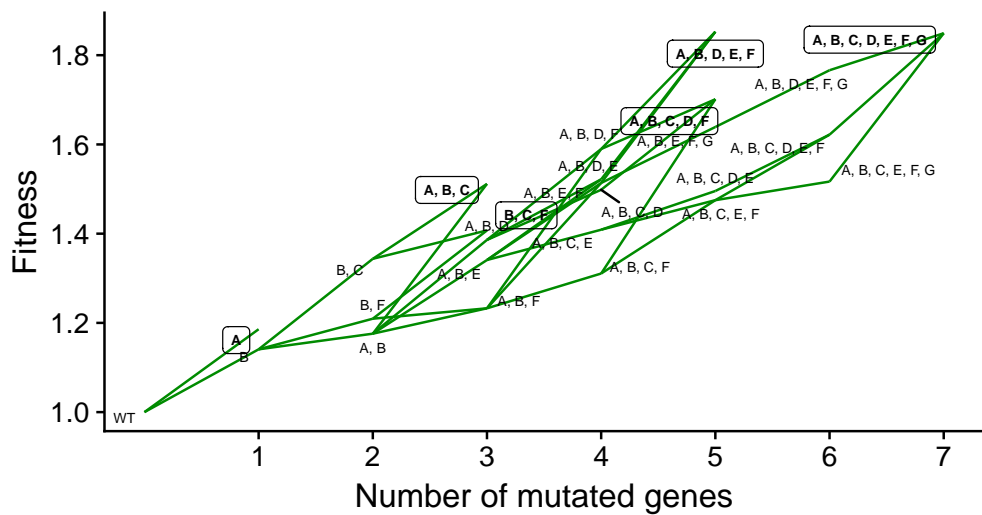

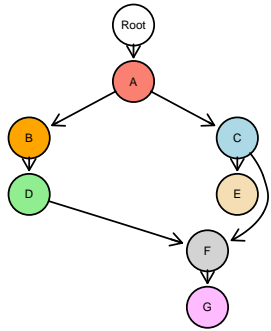

ID [XMtNwZBJ7EWu8yH7](#)  
 acc genotypes 14  
 peaks no back 2  
 removed edges 2  
 prop rem edges 0.105

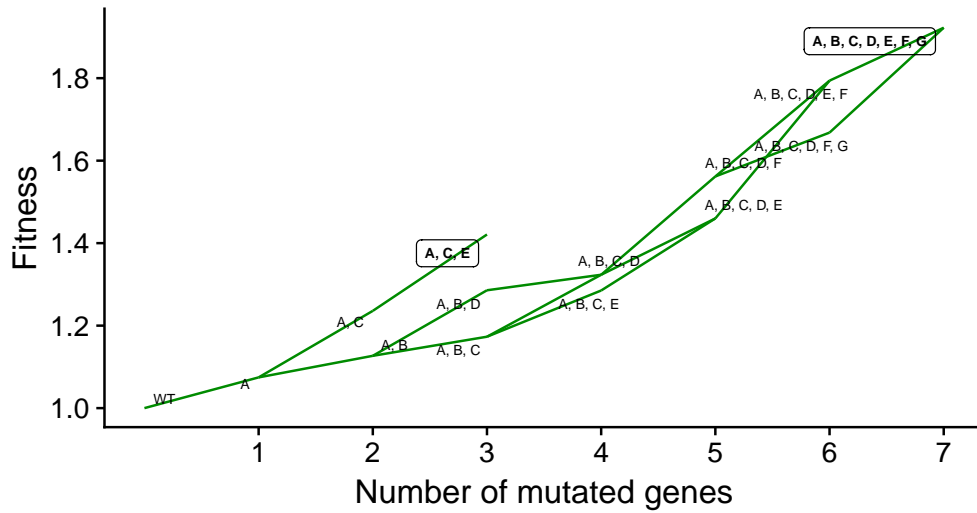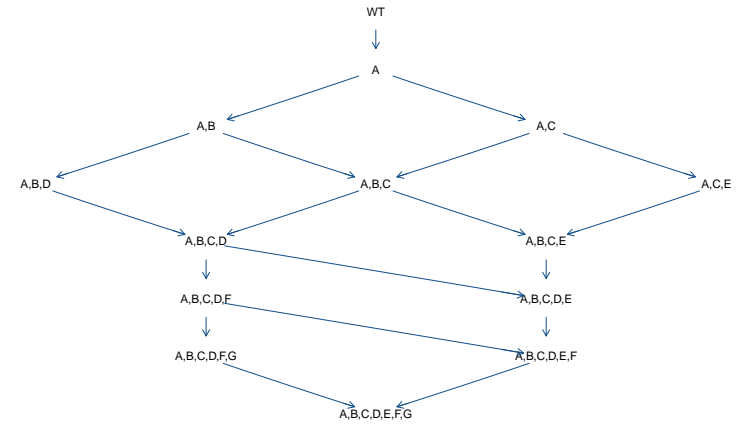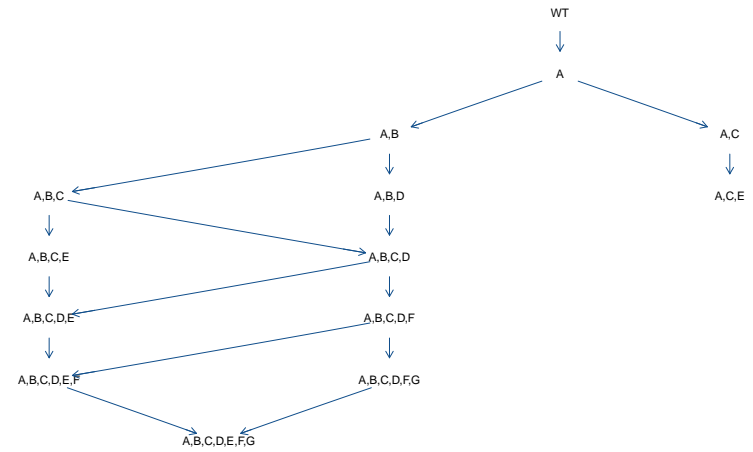



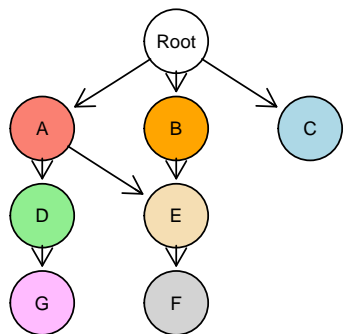

ID xN6jmjSdIYDI6ALk  
 acc genotypes 28  
 peaks no back 3  
 removed edges 5  
 prop rem edges 0.093

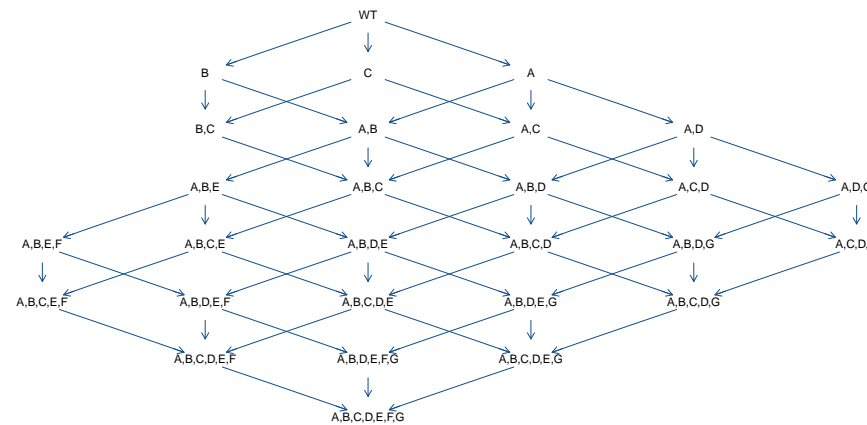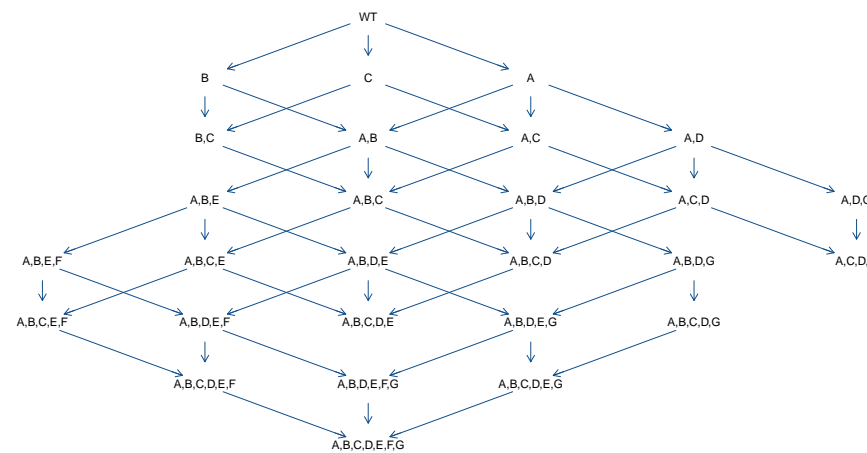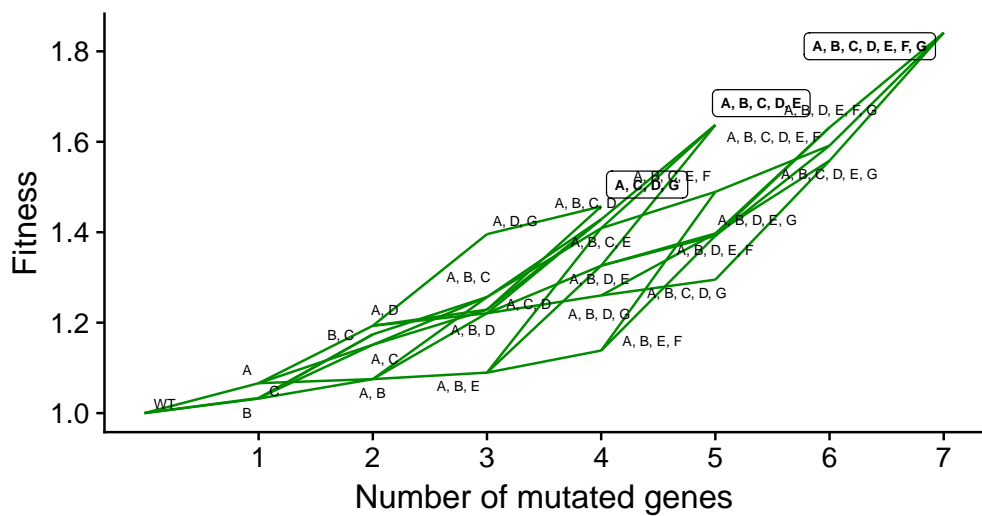

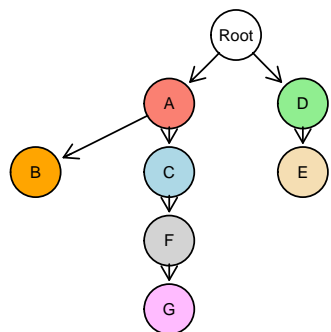

ID [xQCUt6eox10t8NYNj](#)  
 acc genotypes 27  
 peaks no back 5  
 removed edges 7  
 prop rem edges 0.137

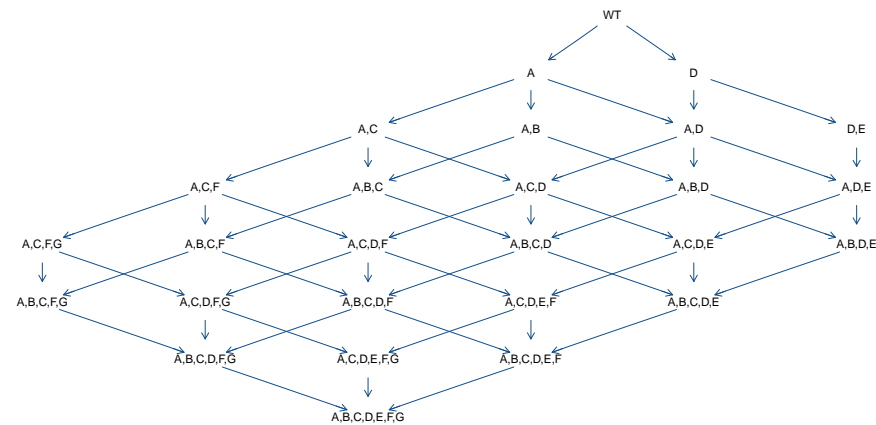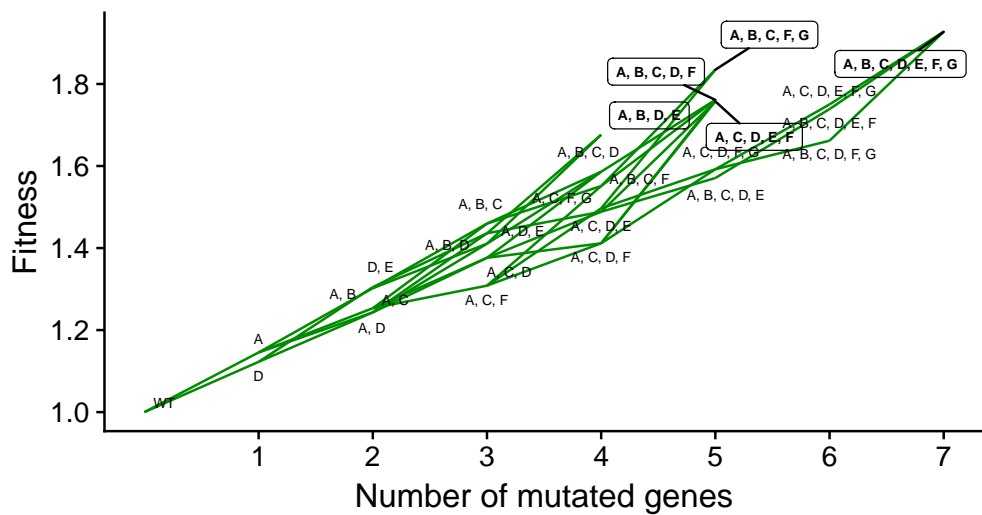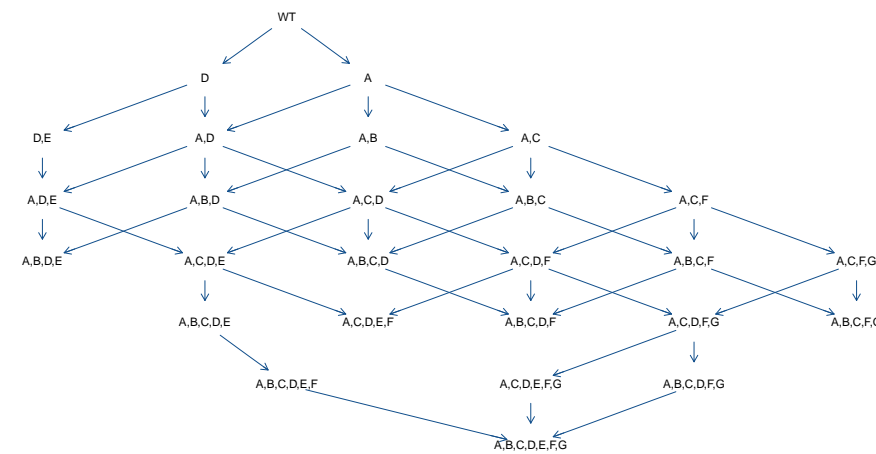

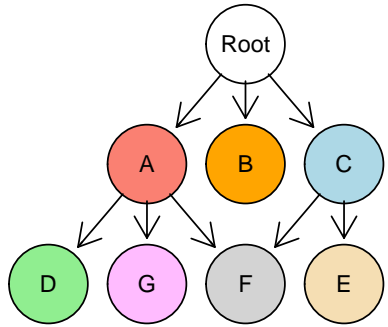

ID **xsLEpm8mUqbWuEtX**  
 acc genotypes **46**  
 peaks no back **6**  
 removed edges **22**  
 prop rem edges **0.195**

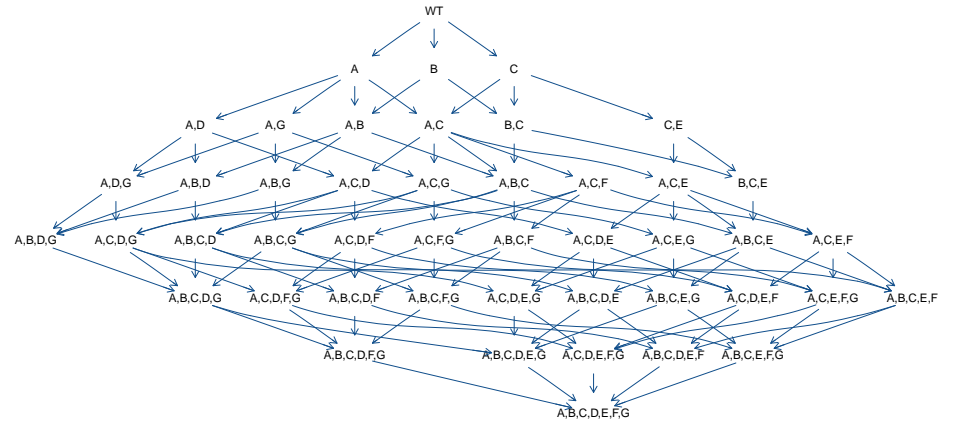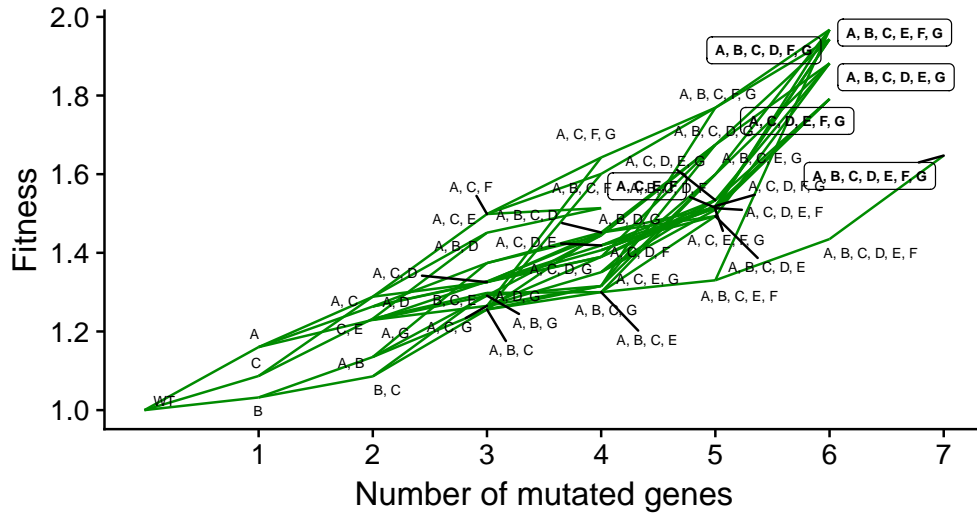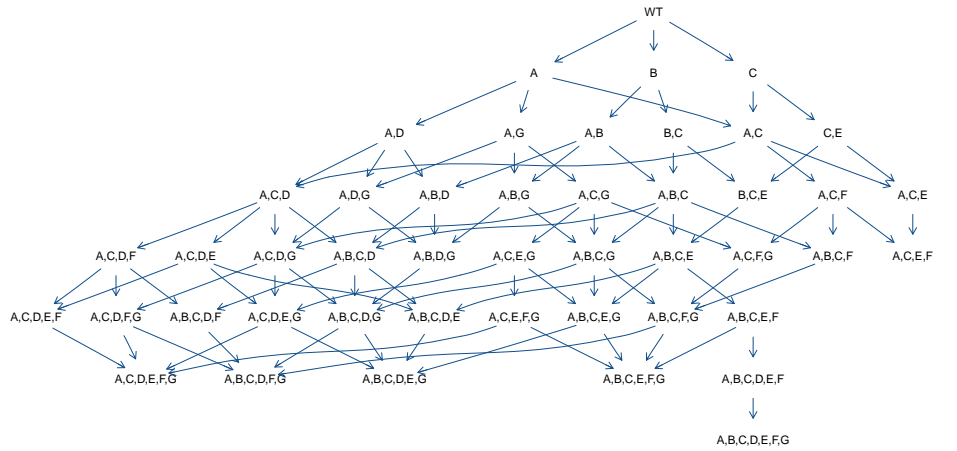

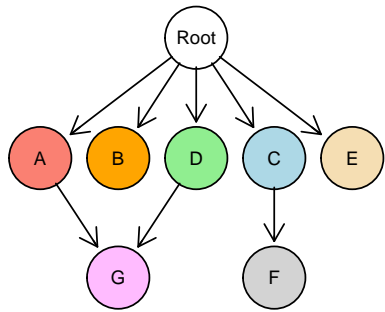

ID XUvwmwc1Jrh7g5gR  
 acc genotypes 60  
 peaks no back 7  
 removed edges 26  
 prop rem edges 0.162

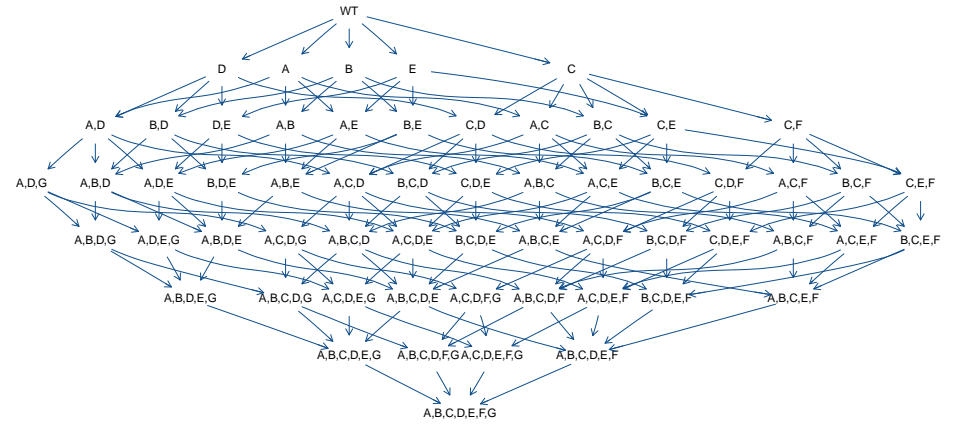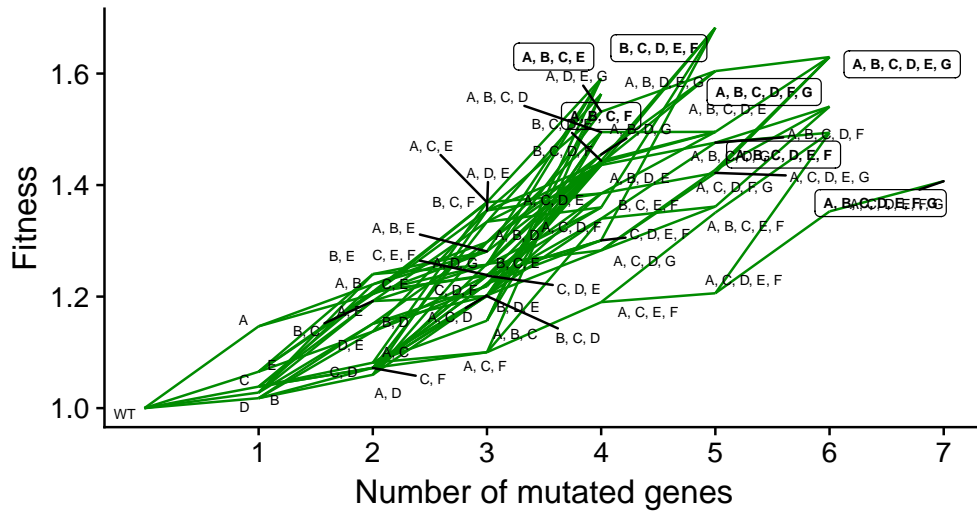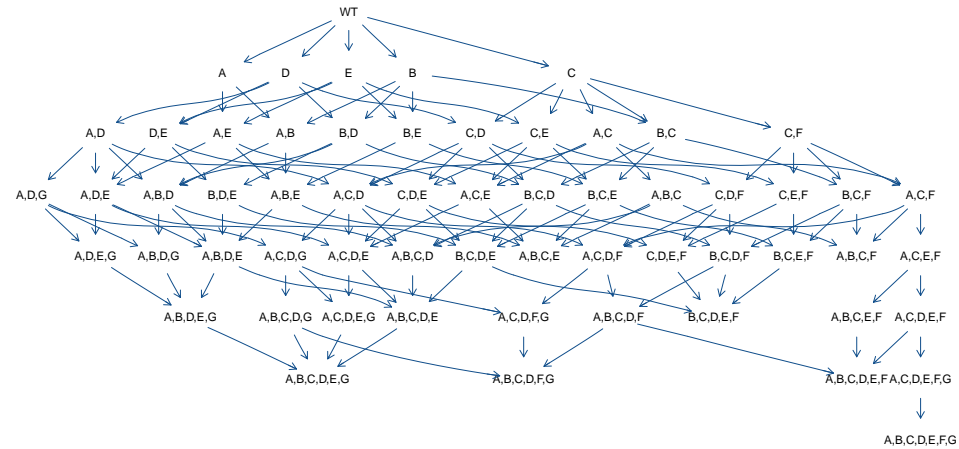

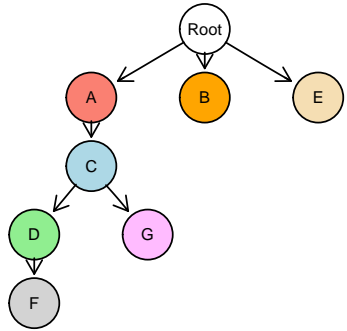

ID **XvPBLPU6GY62cXv3**  
 acc genotypes **32**  
 peaks no back **6**  
 removed edges **11**  
 prop rem edges **0.162**

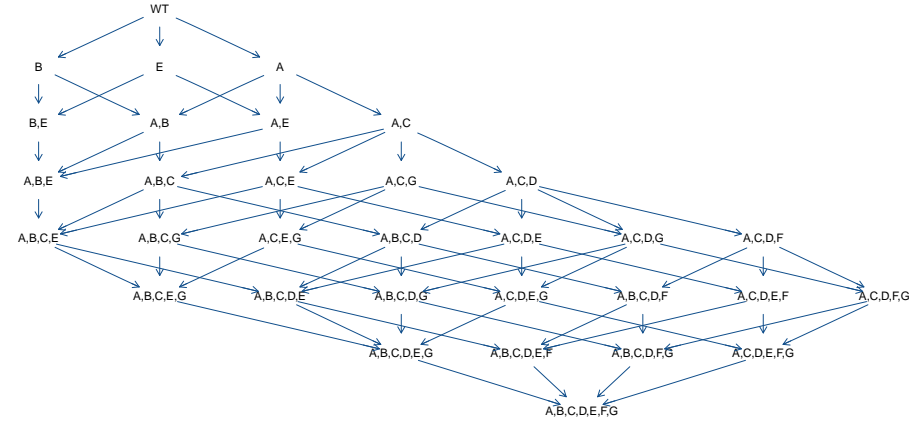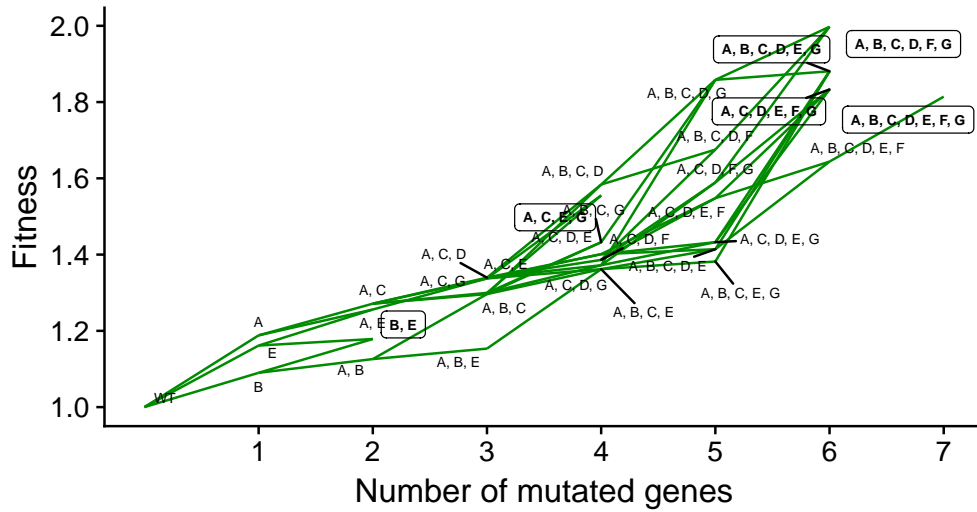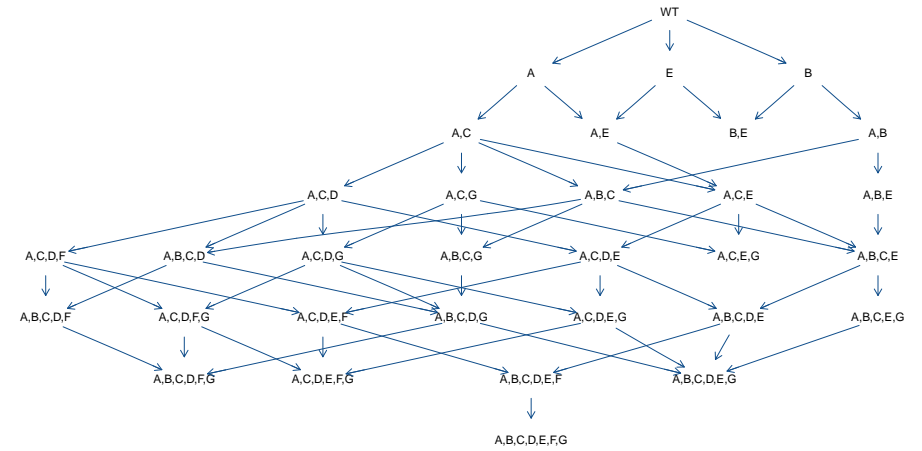

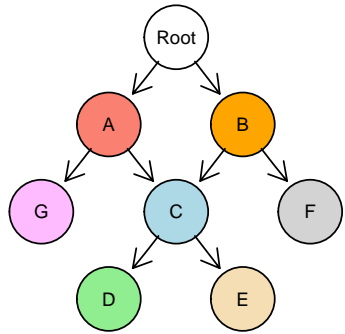

ID **yBXLyZECBuzOCwPP**  
 acc genotypes **25**  
 peaks no back **2**  
 removed edges **4**  
 prop rem edges **0.083**

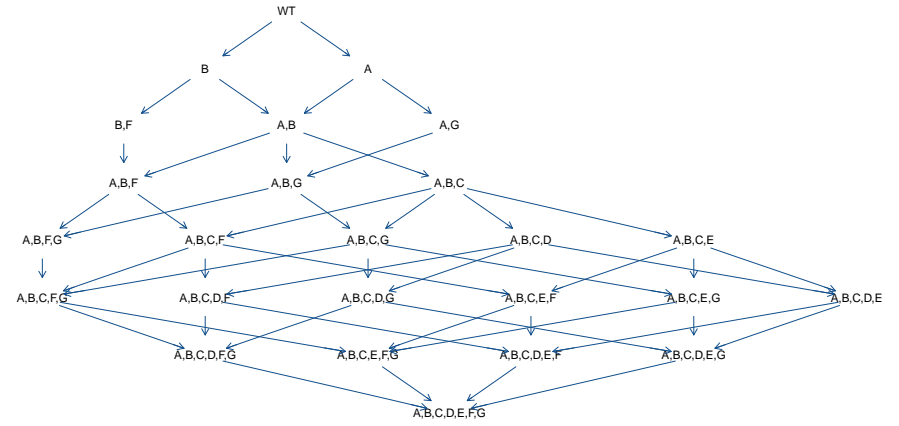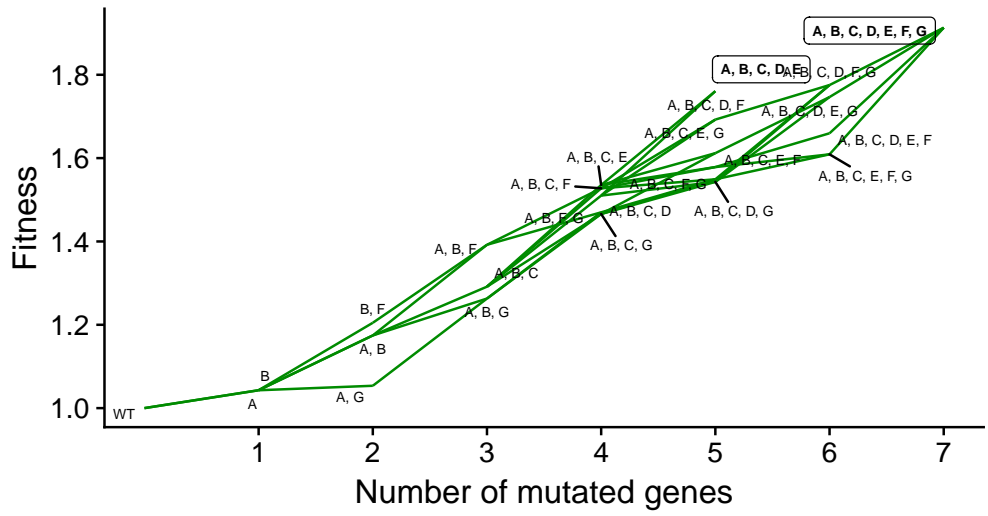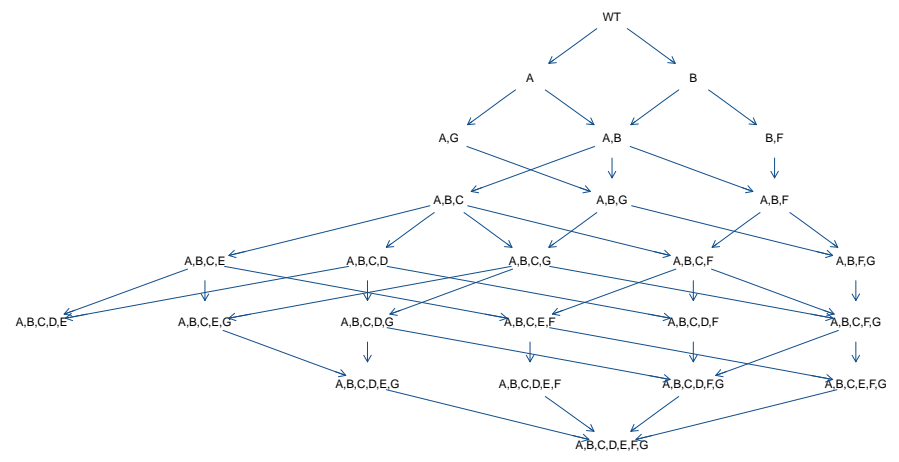

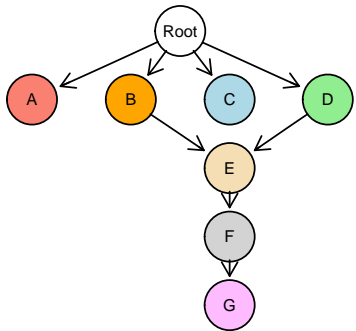

ID *ycfMUx16qqaBjW*  
 acc genotypes 28  
 peaks no back 6  
 removed edges 11  
 prop rem edges 0.196

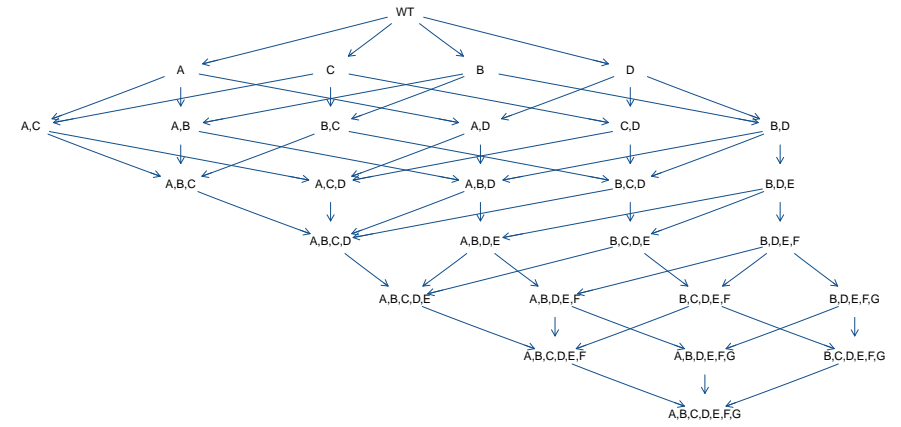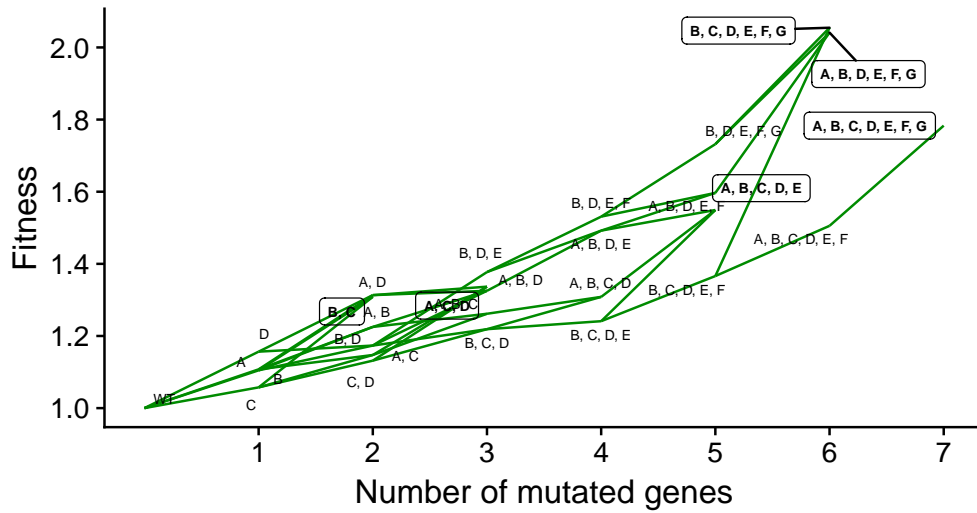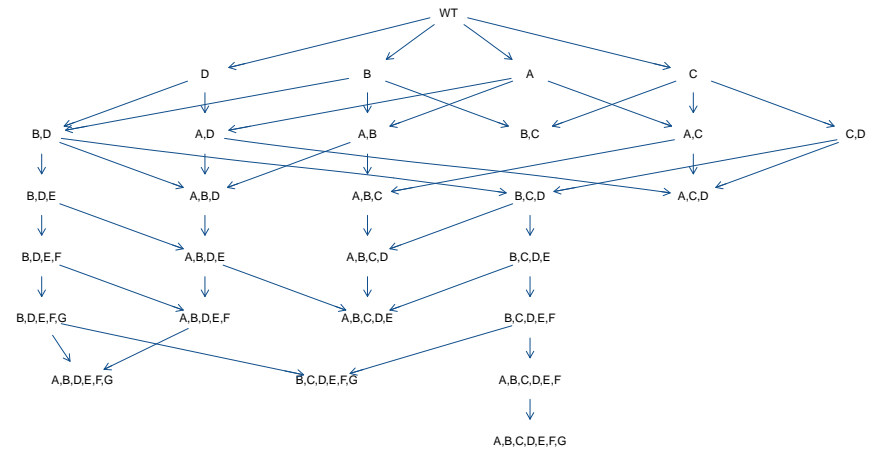

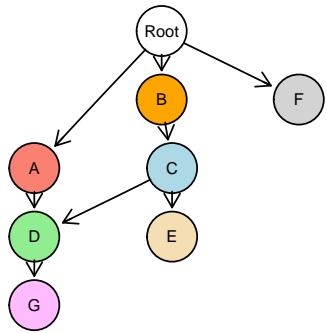

ID [yCxbC75Zji2W7wiD](#)  
 acc genotypes 24  
 peaks no back 7  
 removed edges 11  
 prop rem edges 0.25

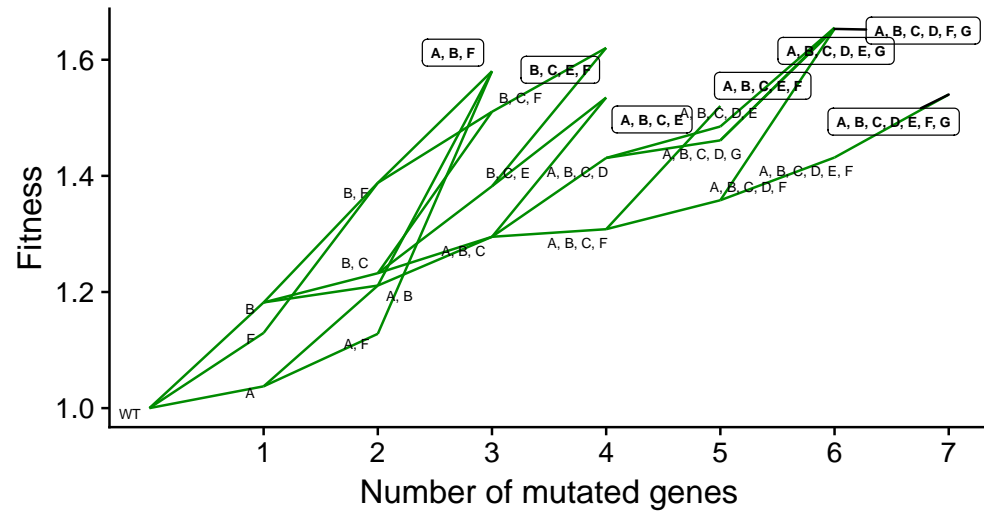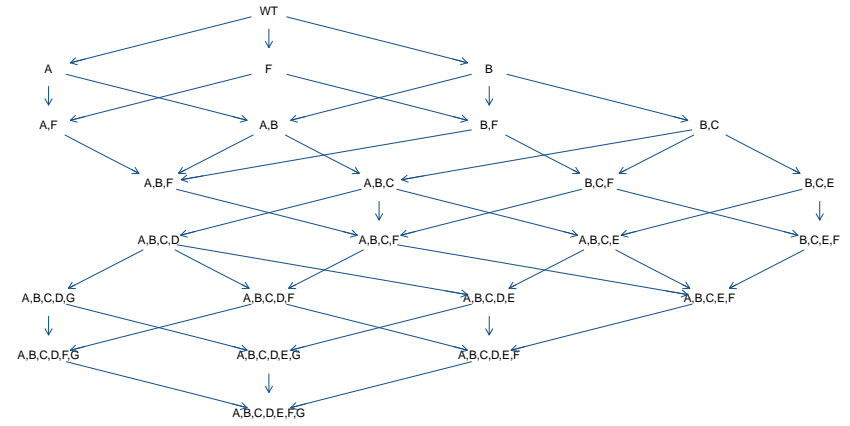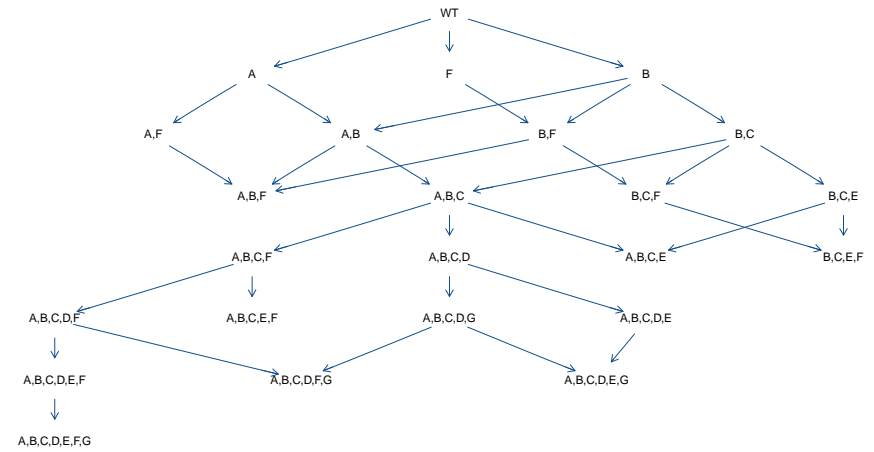



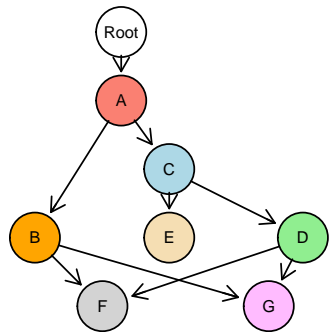

ID [yoDIXpd2iByH7zZf](#)  
 acc genotypes 17  
 peaks no back 5  
 removed edges 6  
 prop rem edges 0.222

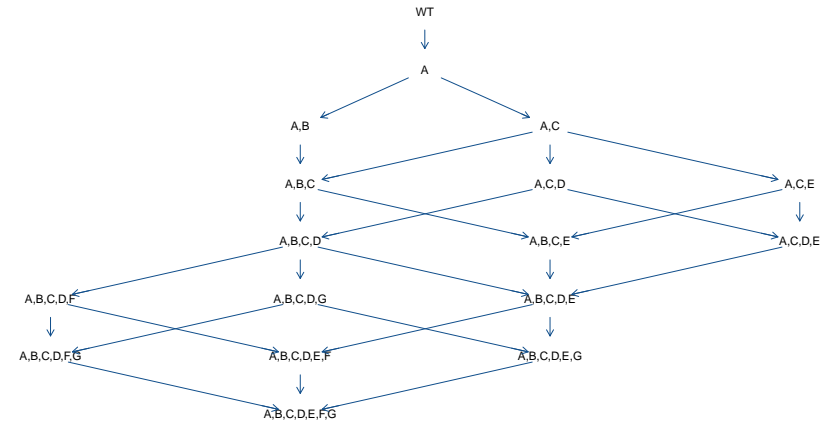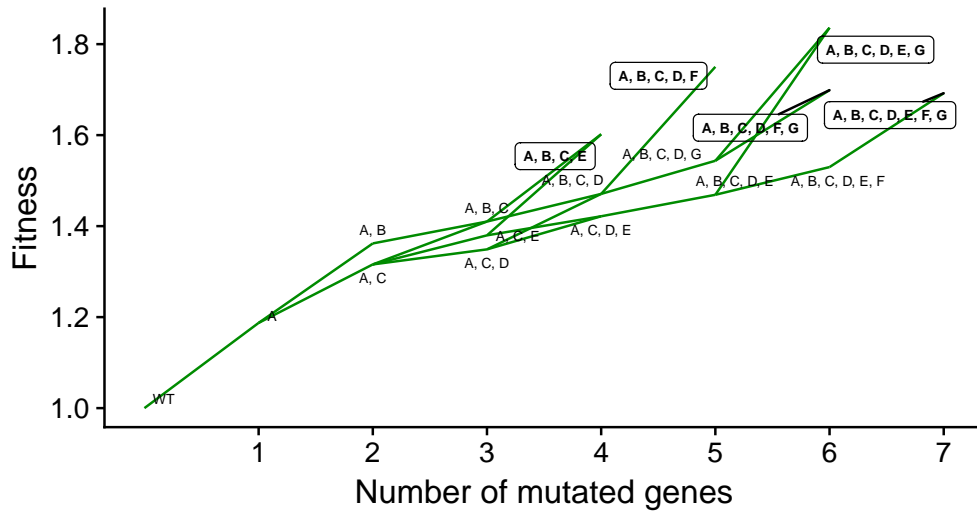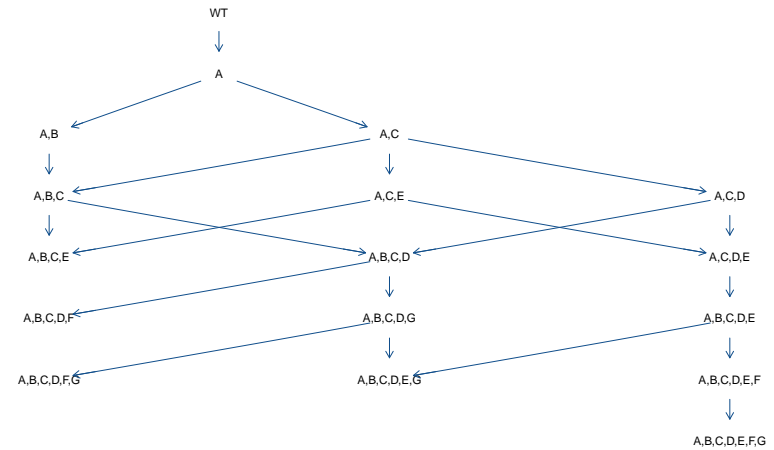

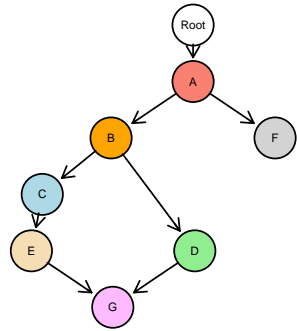

ID YqJMzkvAccJ4gHYm  
 acc genotypes 17  
 peaks no back 3  
 removed edges 3  
 prop rem edges 0.111

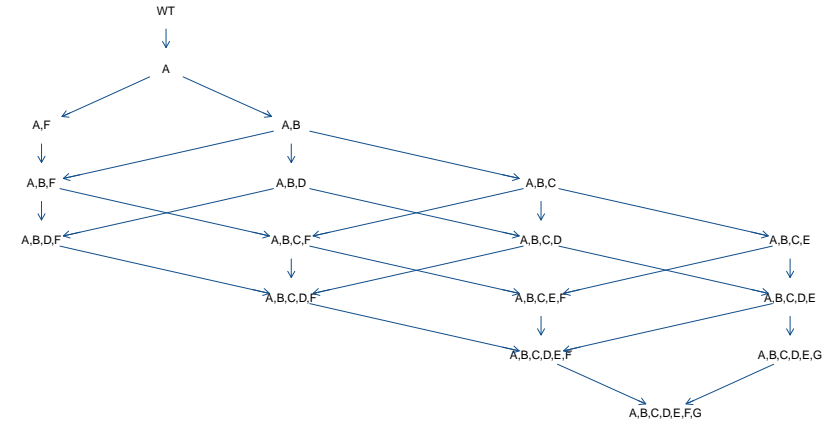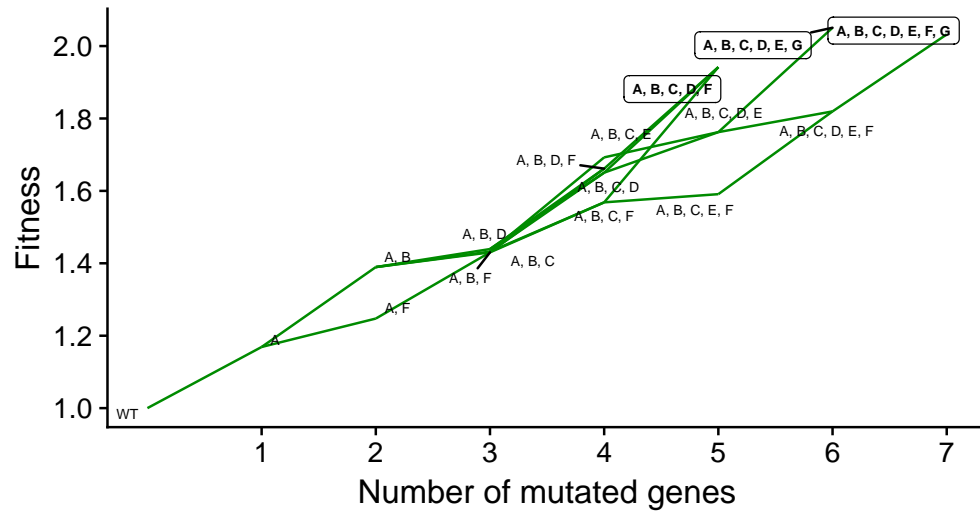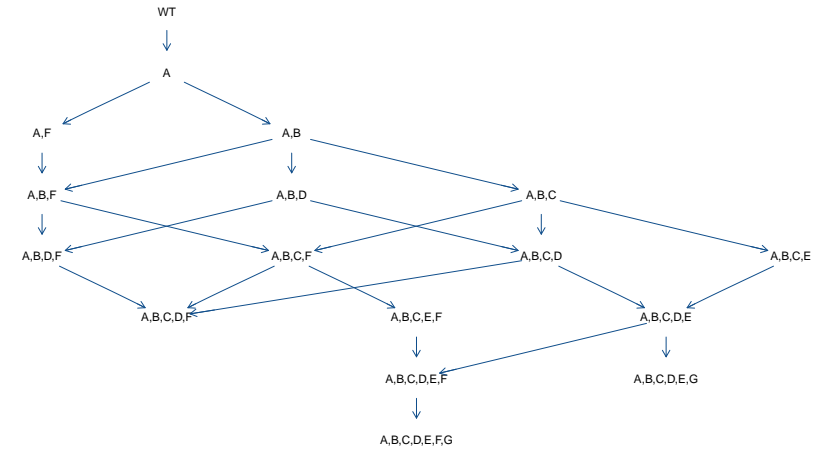

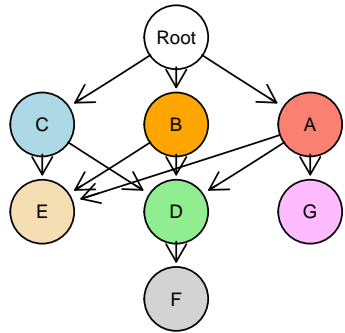

ID **yX5bopH3PiXCr10r7**  
 acc genotypes **22**  
 peaks no back **4**  
 removed edges **8**  
 prop rem edges **0.205**

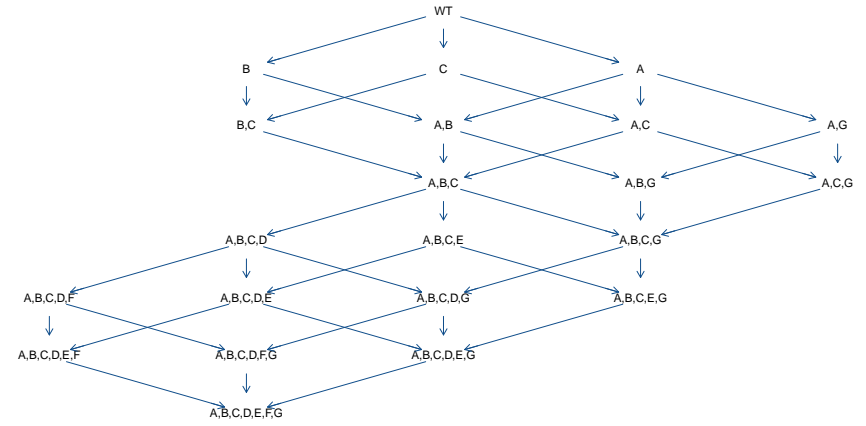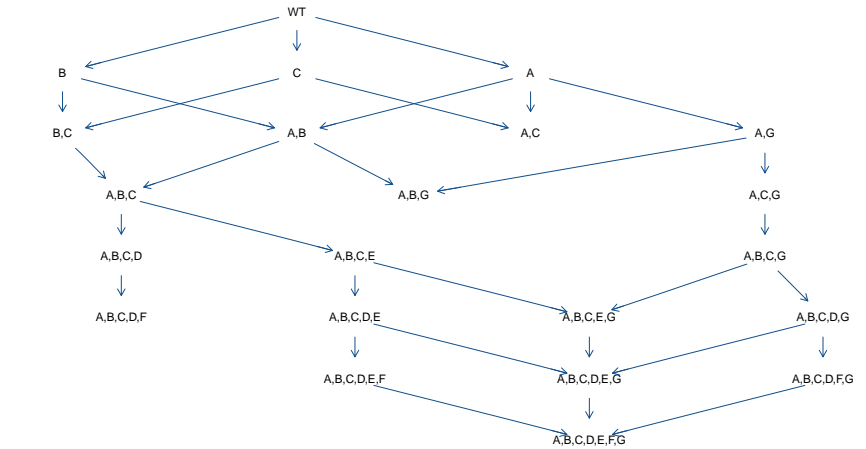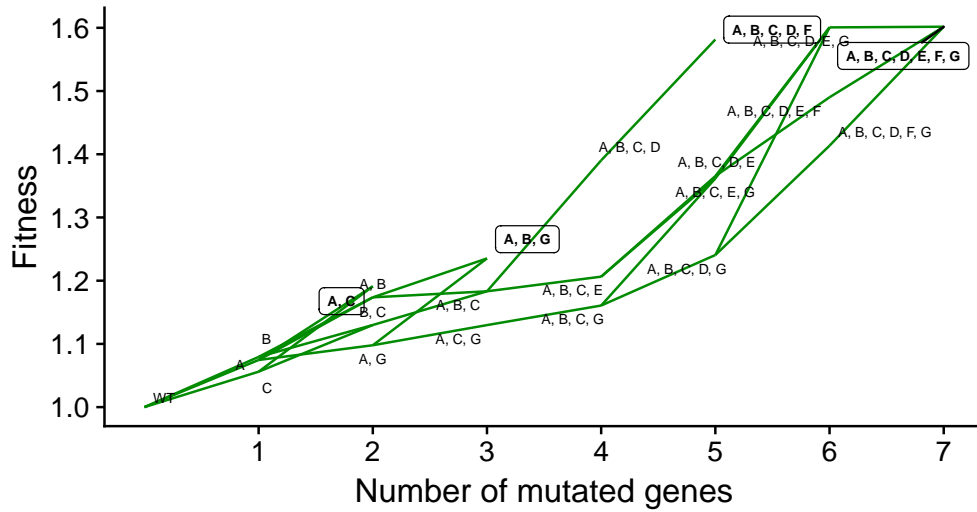

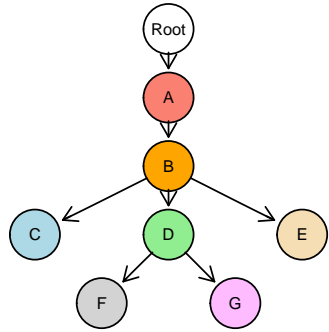

ID [yy6dYwpU1ktFm49a](#)  
 acc genotypes 22  
 peaks no back 6  
 removed edges 10  
 prop rem edges 0.238

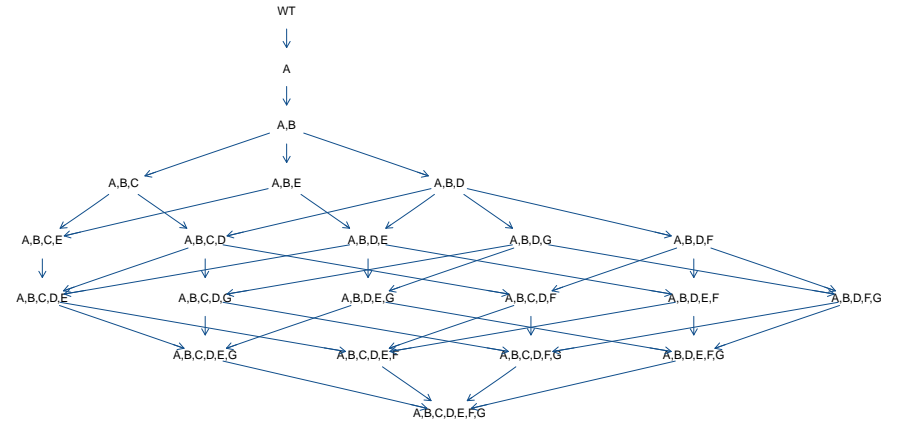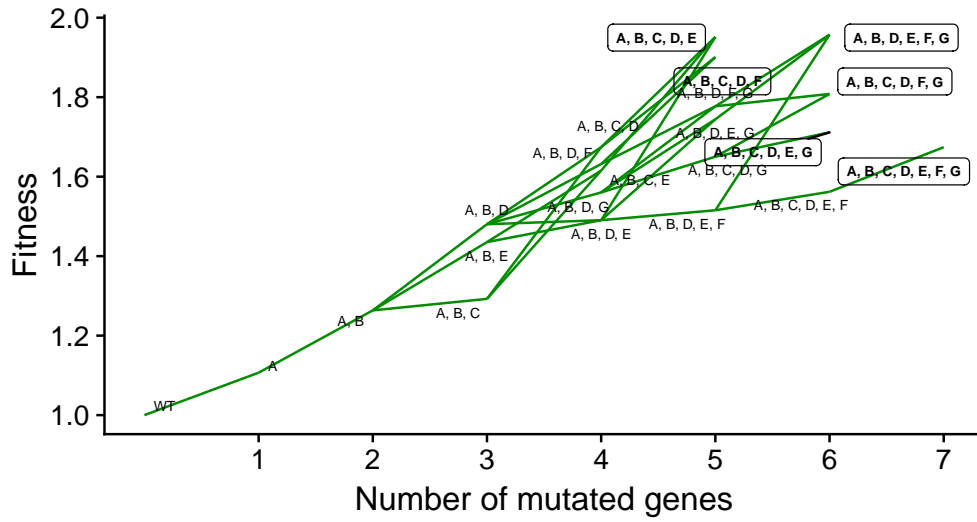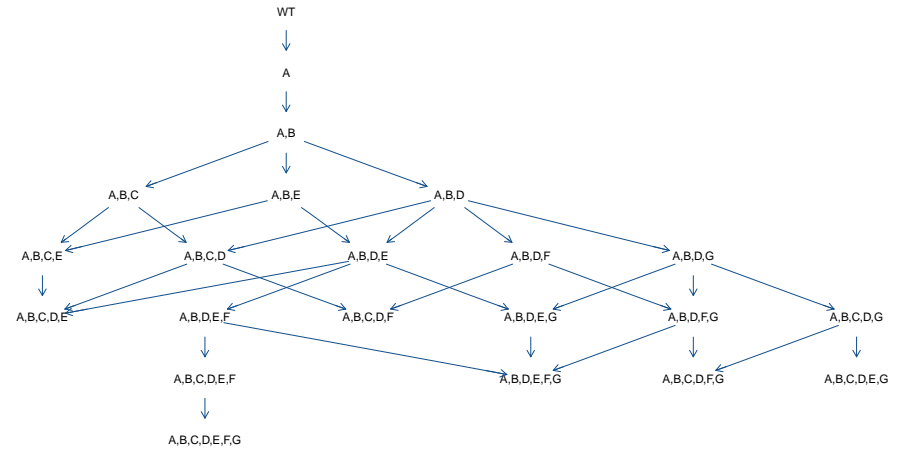

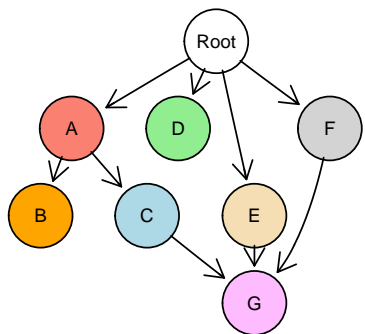

ID **zE6cfkQmrWIDYn5D**  
 acc genotypes **44**  
 peaks no back **5**  
 removed edges **18**  
 prop rem edges **0.167**

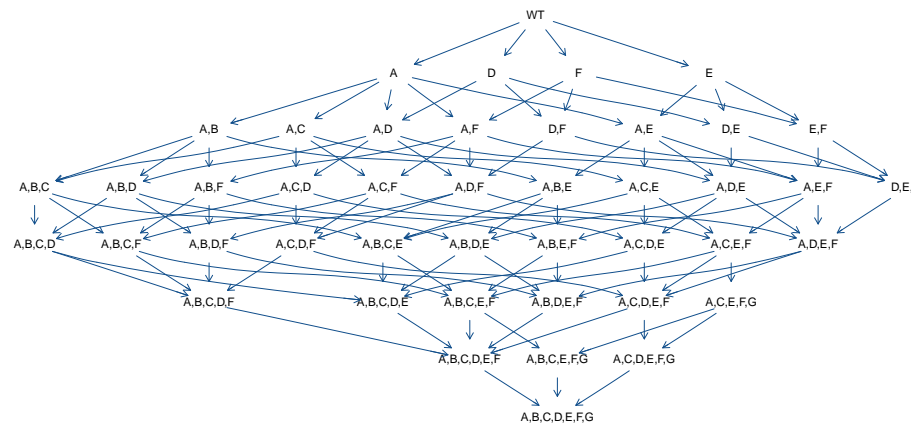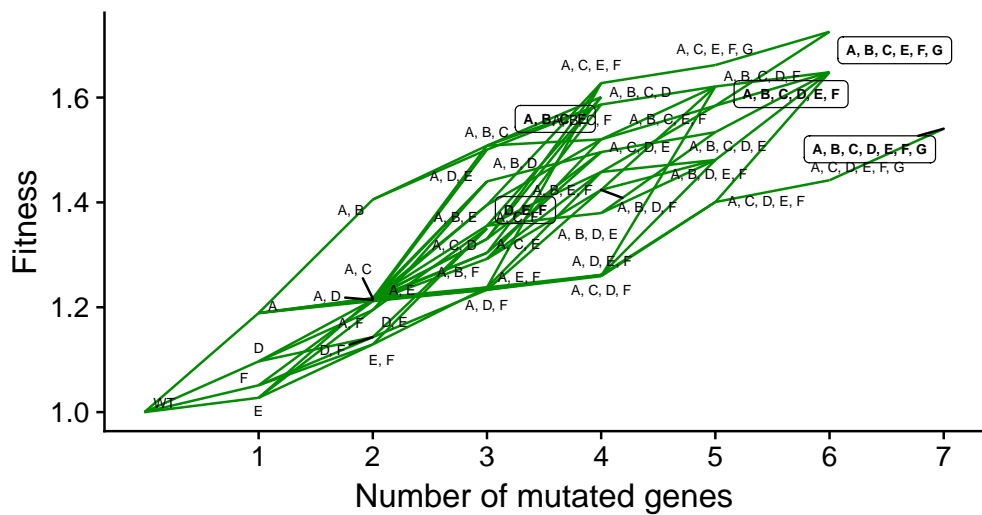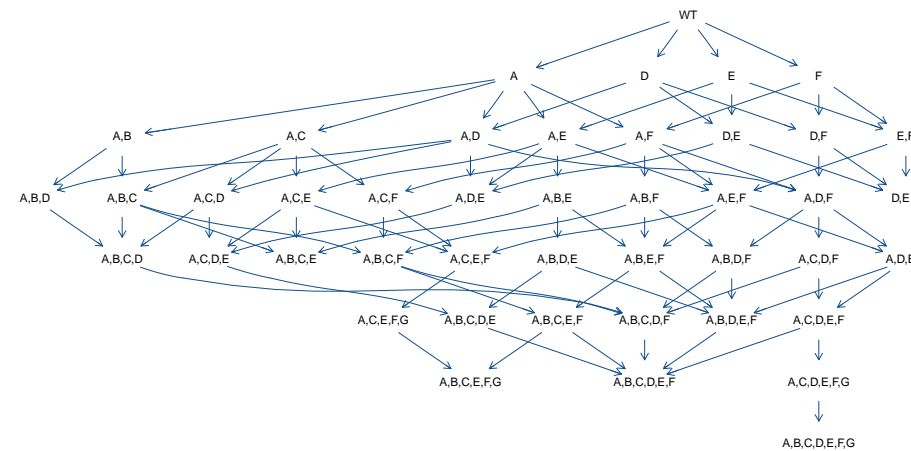

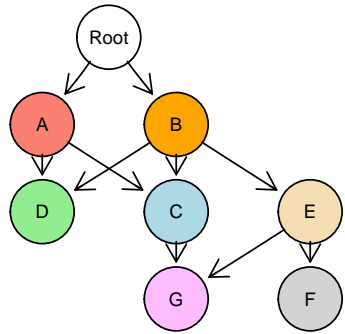

ID **zHGCza3O5qL97M76**  
 acc genotypes **21**  
 peaks no back 2  
 removed edges 3  
 prop rem edges 0.083

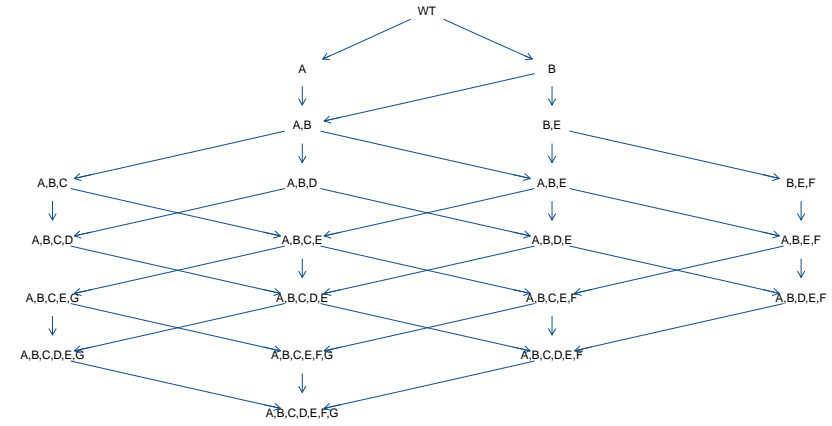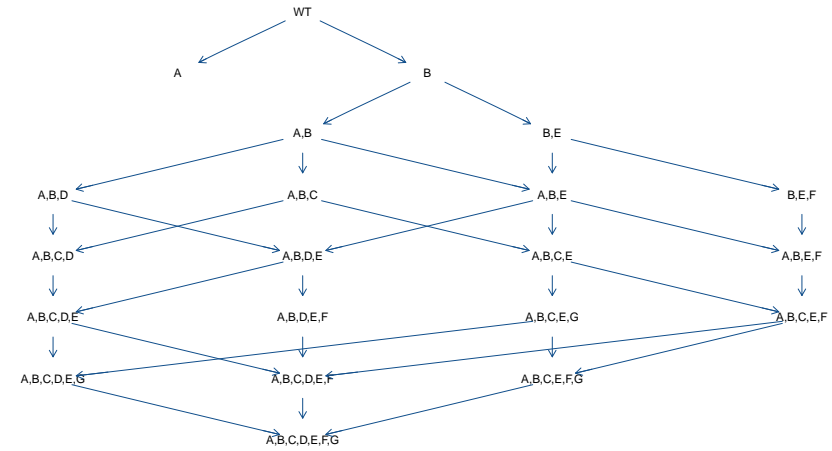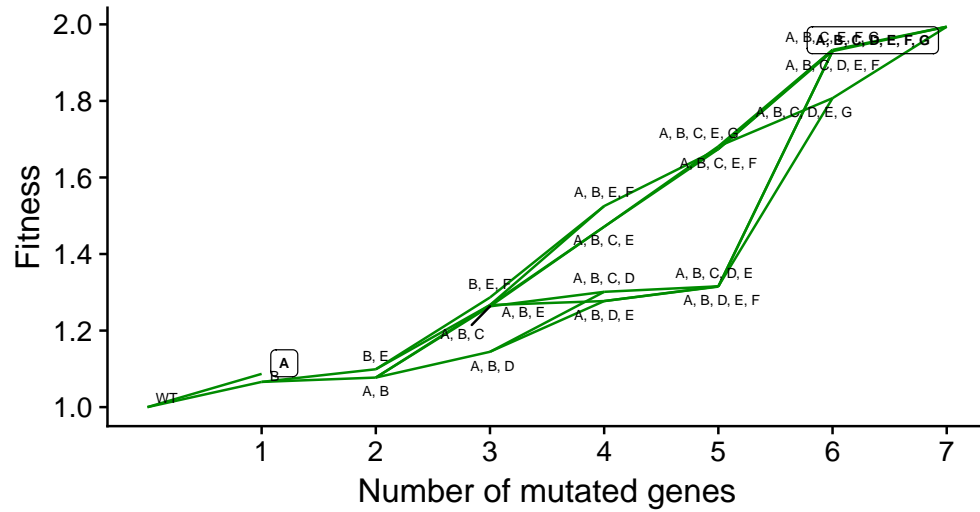

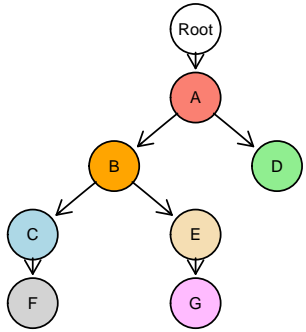

ID **ZkjYaBc10QMnrUp8W**  
 acc genotypes **21**  
 peaks no back **3**  
 removed edges **2**  
 prop rem edges **0.054**

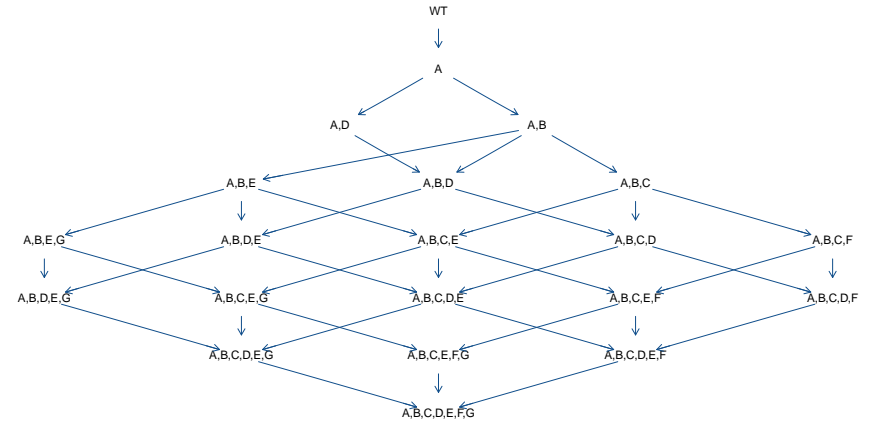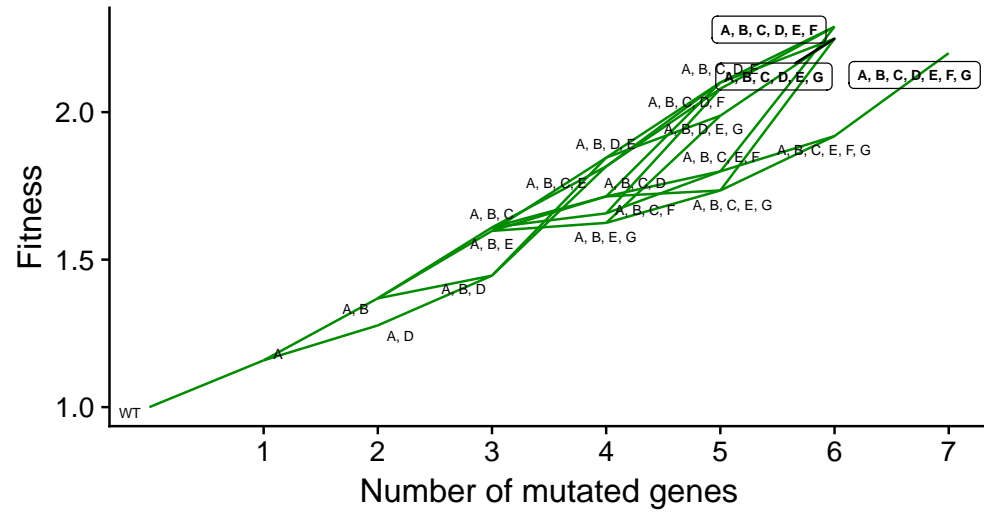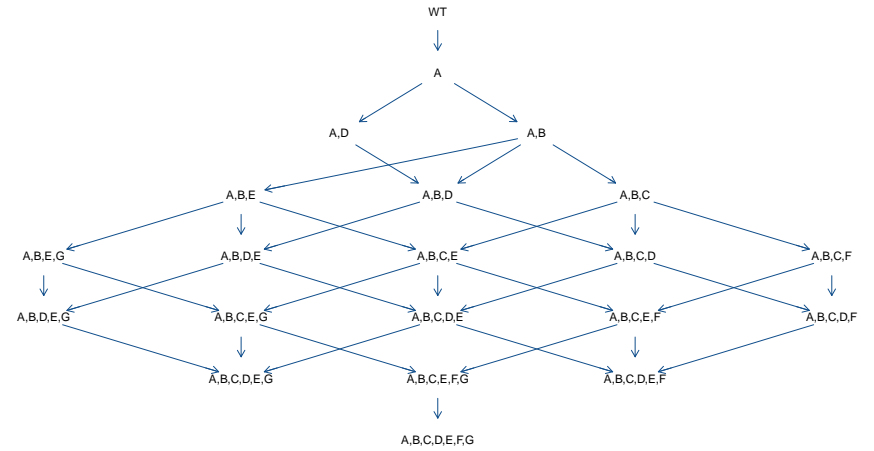

ID 10bxK1gc1xCjpaJM  
 acc genotypes 24  
 peaks no back 9  
 removed edges NA  
 prop rem edges NA

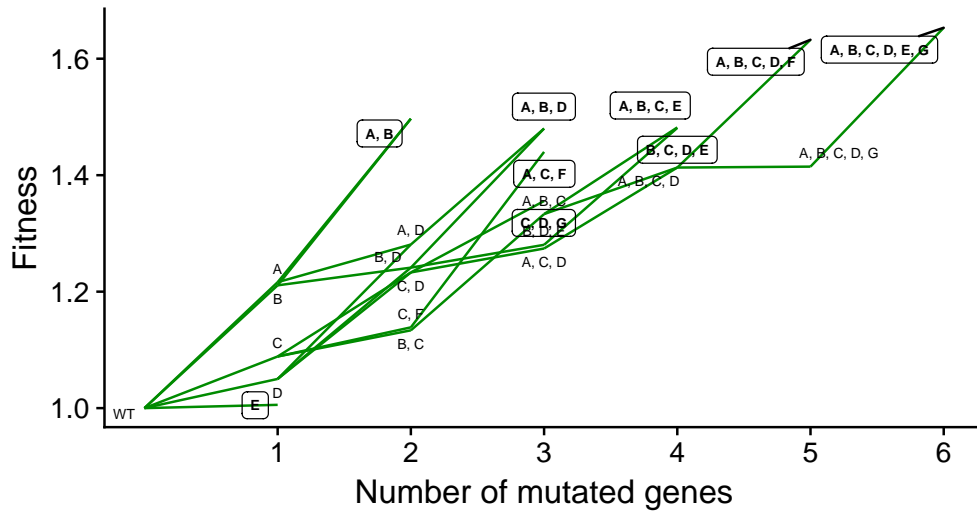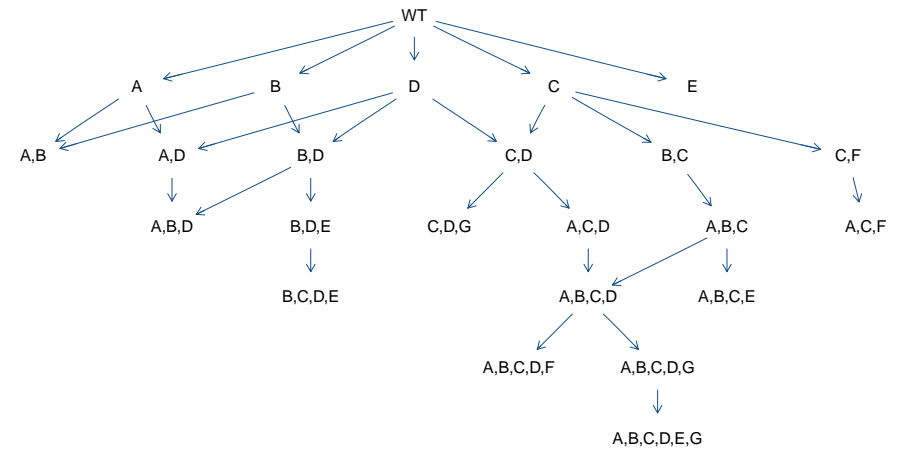



ID 10fs6bc54hwzLal8K  
 acc genotypes 99  
 peaks no back 14  
 removed edges NA  
 prop rem edges NA

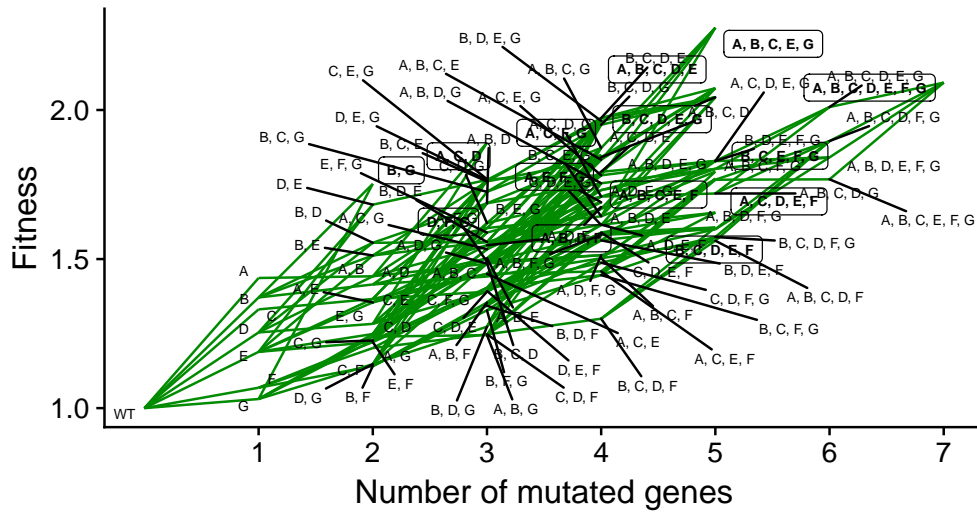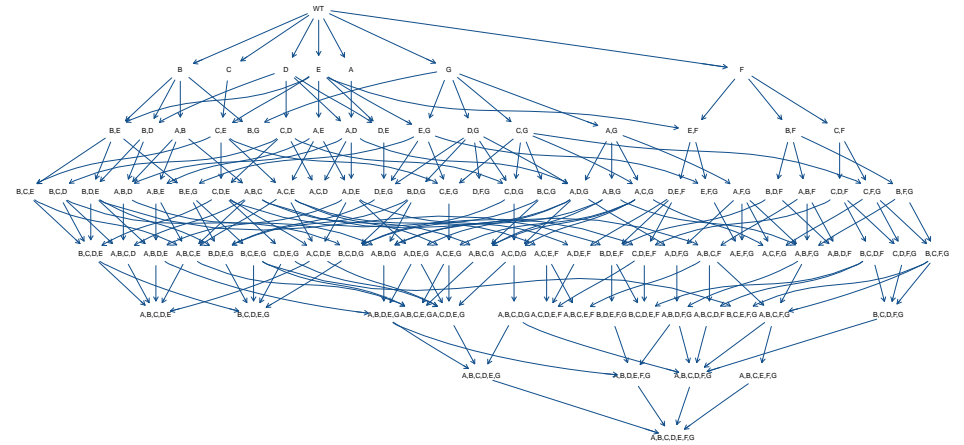

ID 10H8qiQAOoVrnY9T3  
 acc genotypes 42  
 peaks no back 15  
 removed edges NA  
 prop rem edges NA

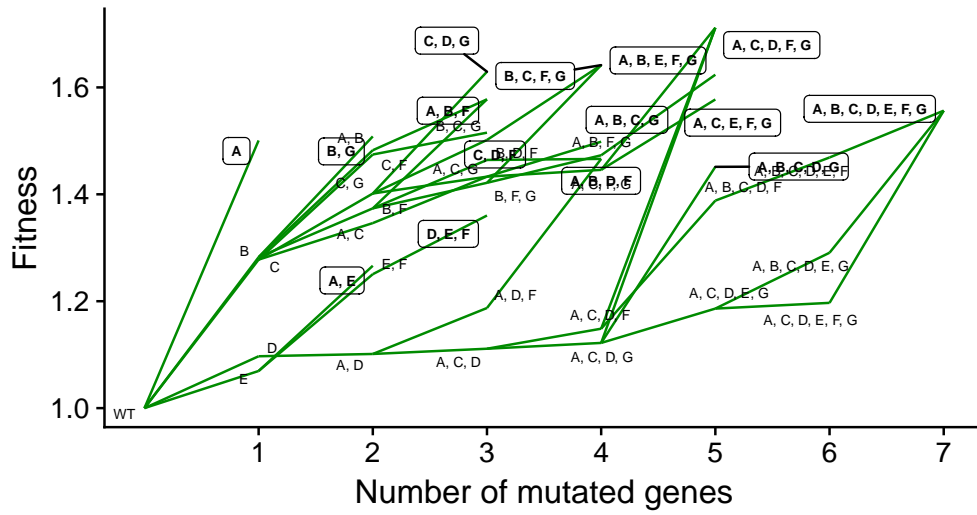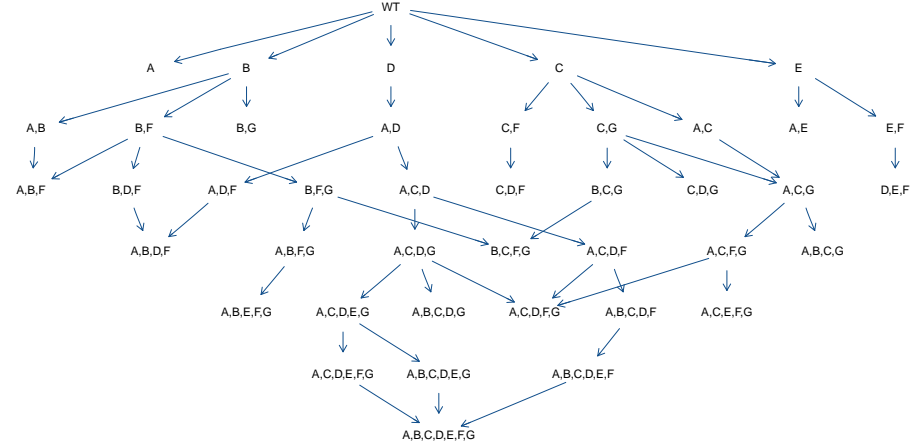



ID 10uEnjADj4VYkG10Z6  
 acc genotypes 58  
 peaks no back 26  
 removed edges NA  
 prop rem edges NA

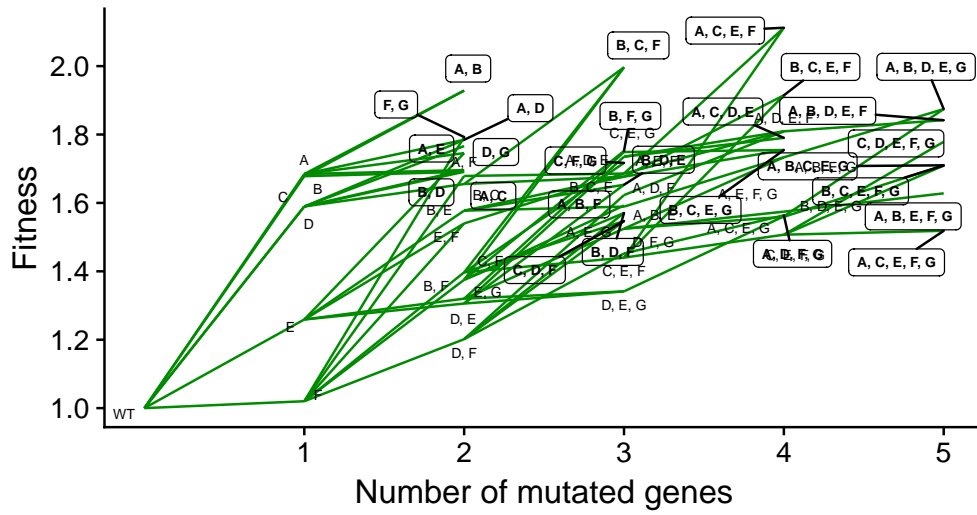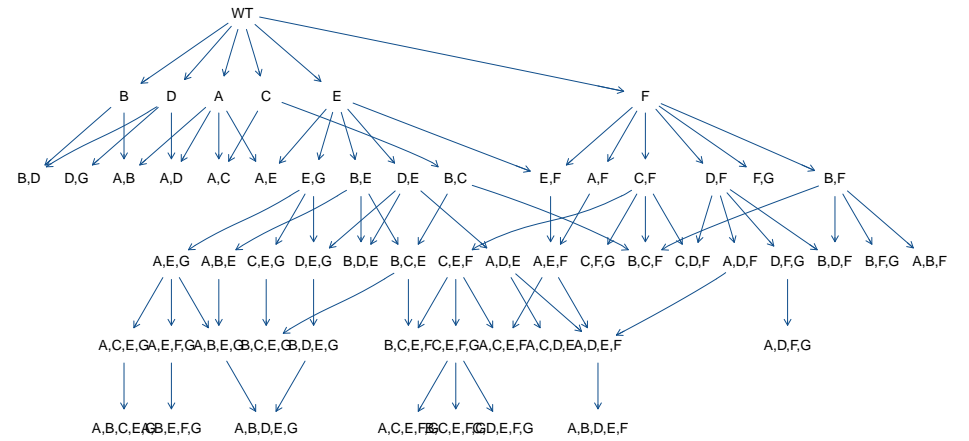

ID 16H2tTfJLrFoSFFU  
 acc genotypes 23  
 peaks no back 7  
 removed edges NA  
 prop rem edges NA

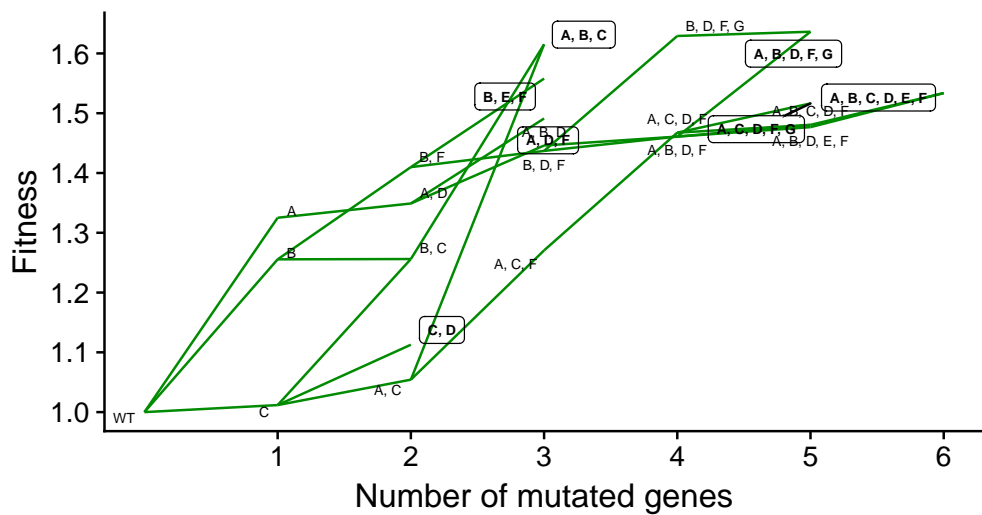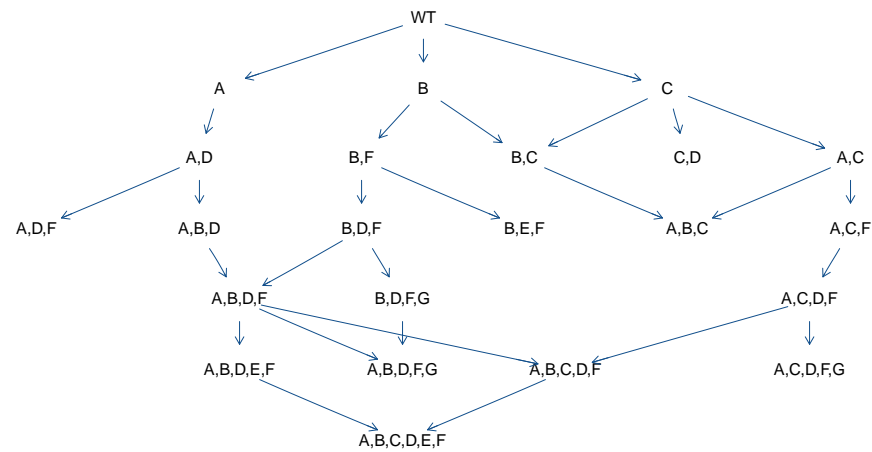

ID 18VIJttljPc2A62  
 acc genotypes 24  
 peaks no back 10  
 removed edges NA  
 prop rem edges NA

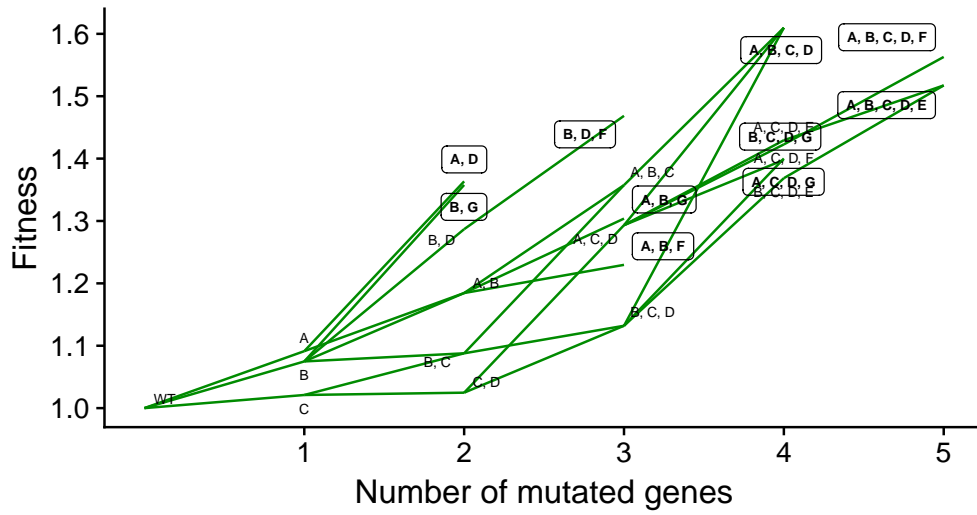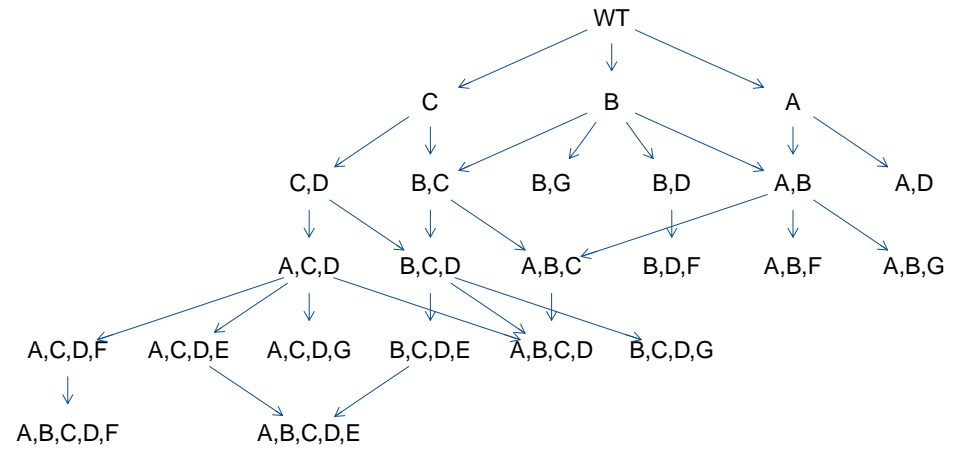

ID 1ylOxuiydzWquD2u  
 acc genotypes 27  
 peaks no back 12  
 removed edges NA  
 prop rem edges NA

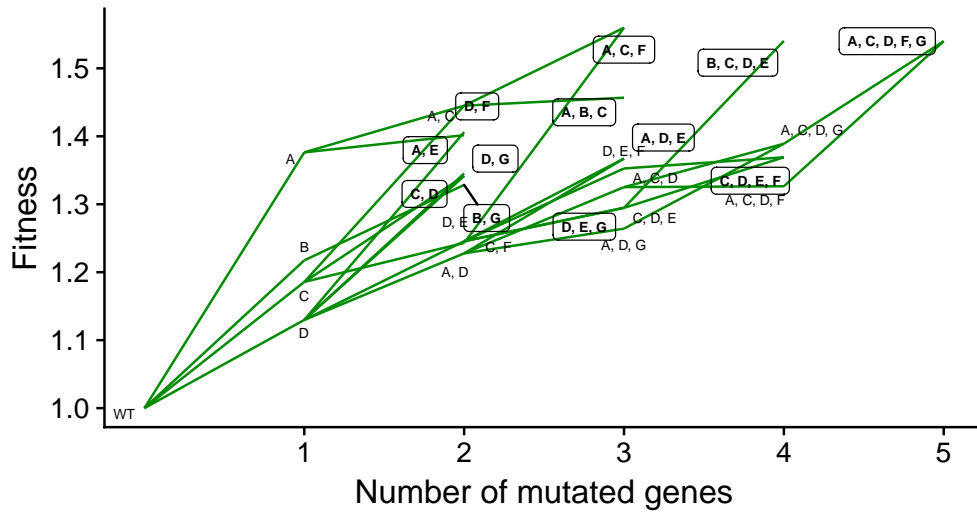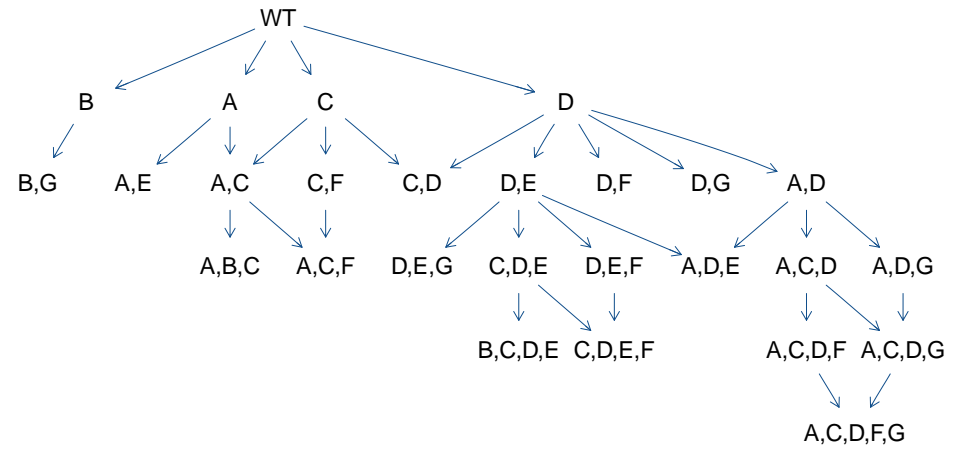

ID 28U7vxmKq8g5SSwV  
 acc genotypes 26  
 peaks no back 11  
 removed edges NA  
 prop rem edges NA

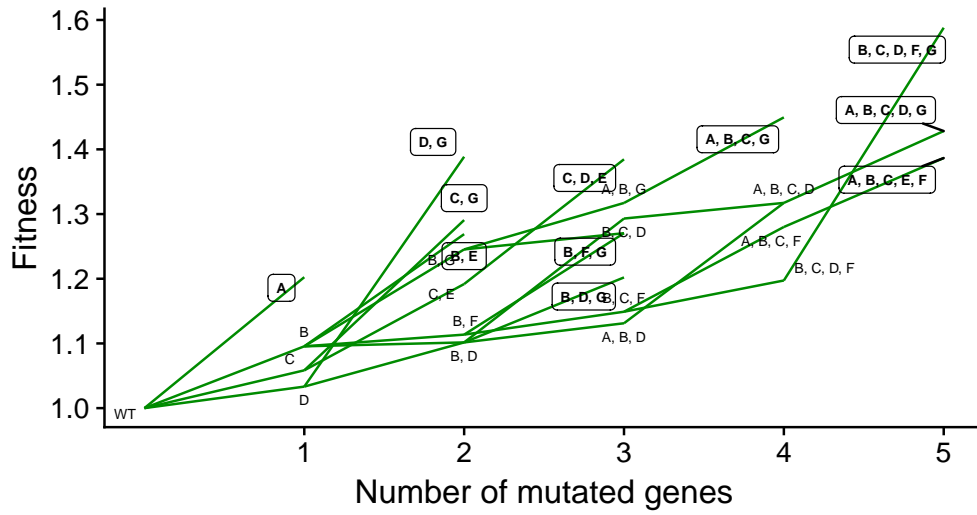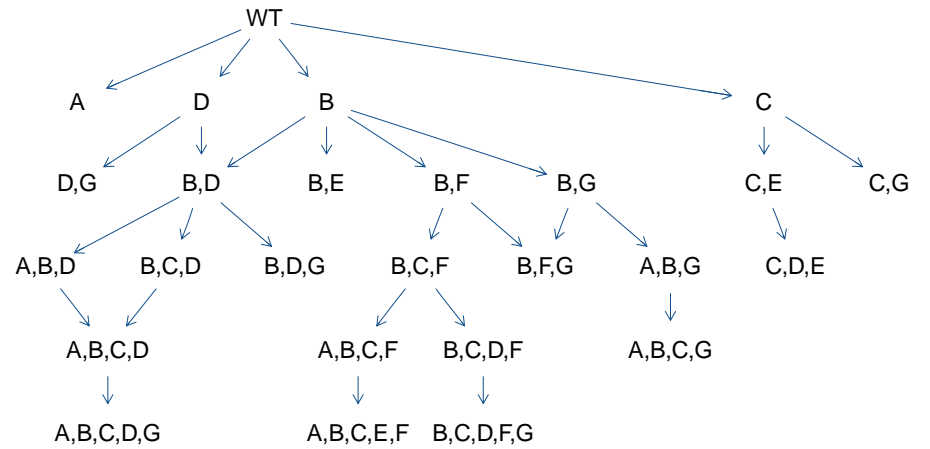



ID 2PO6NSrcnBJAxivm  
 acc genotypes 12  
 peaks no back 5  
 removed edges NA  
 prop rem edges NA

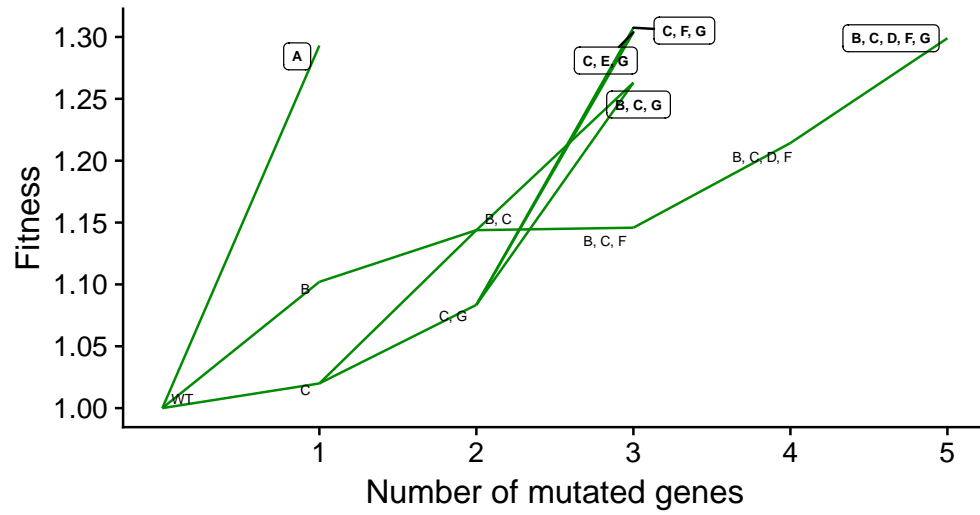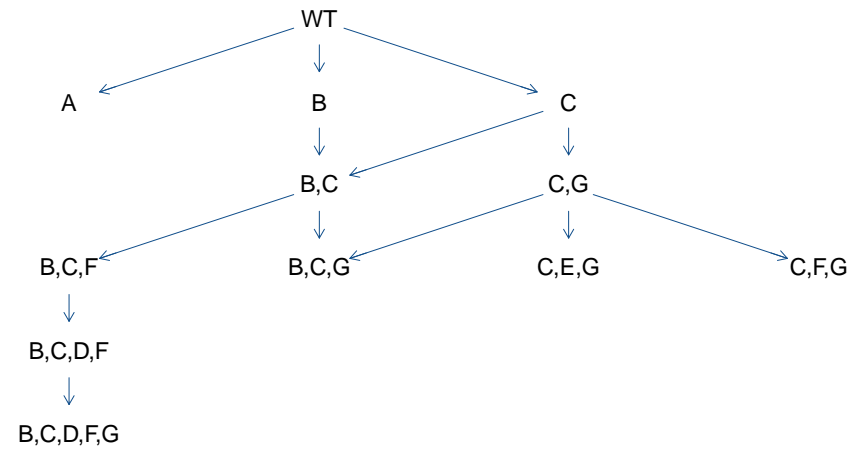

ID 344NmuCSF610Hlunl  
 acc genotypes 44  
 peaks no back 17  
 removed edges NA  
 prop rem edges NA

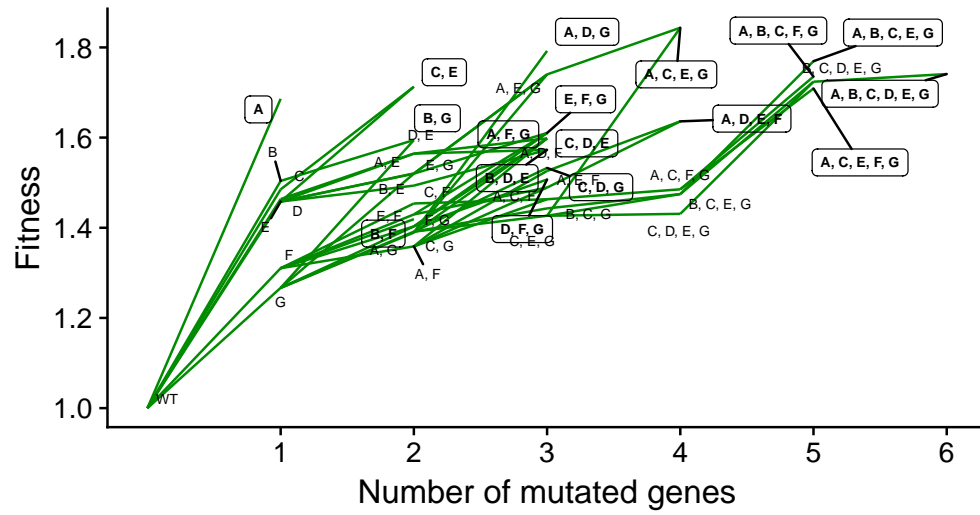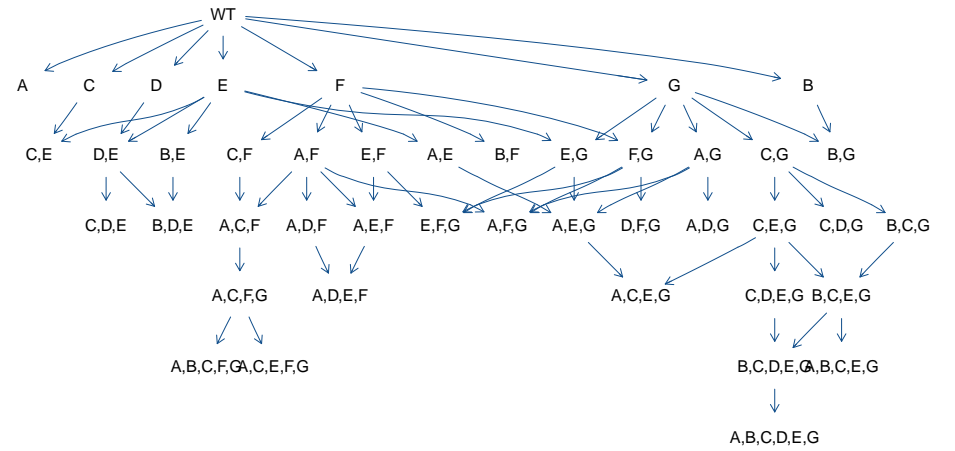

ID 3JtCUkHFLmBXzdb  
 acc genotypes 25  
 peaks no back 13  
 removed edges NA  
 prop rem edges NA

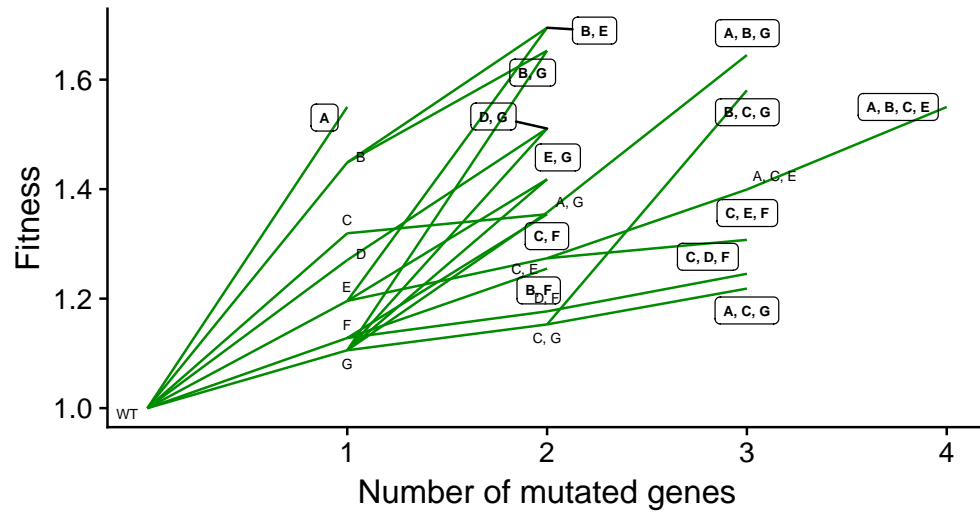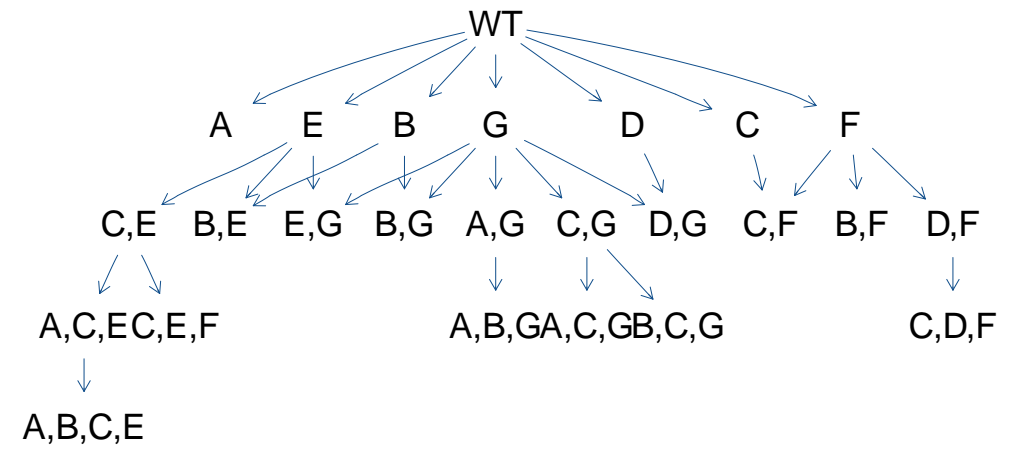

ID 3LxjVpequ1QHM1050  
 acc genotypes 26  
 peaks no back 13  
 removed edges NA  
 prop rem edges NA

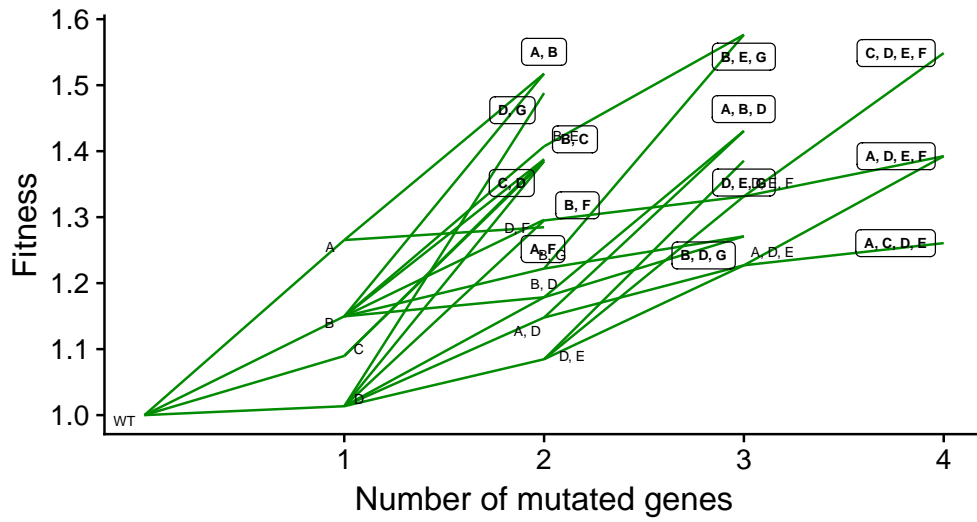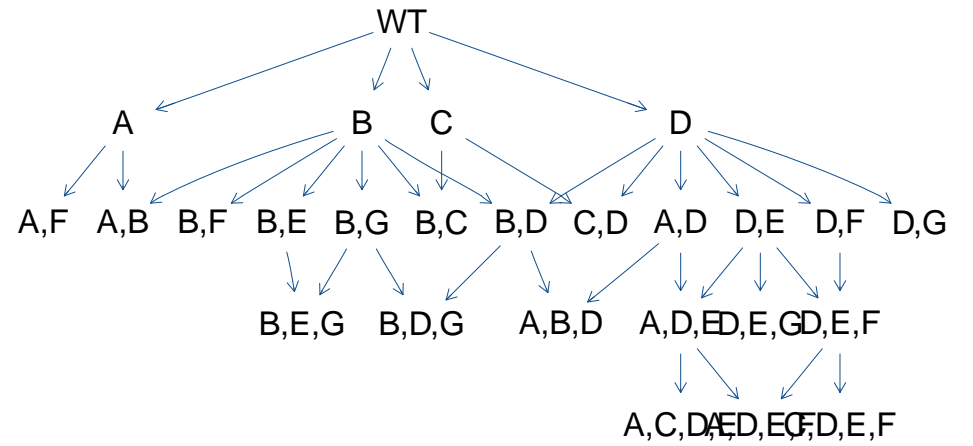

ID 3NwMO8WF7CzUnn4q  
 acc genotypes 57  
 peaks no back 15  
 removed edges NA  
 prop rem edges NA

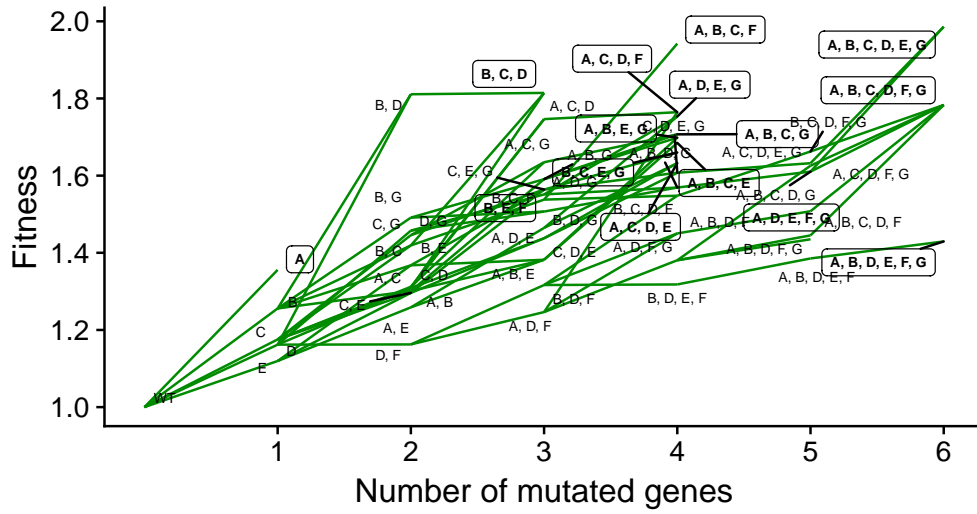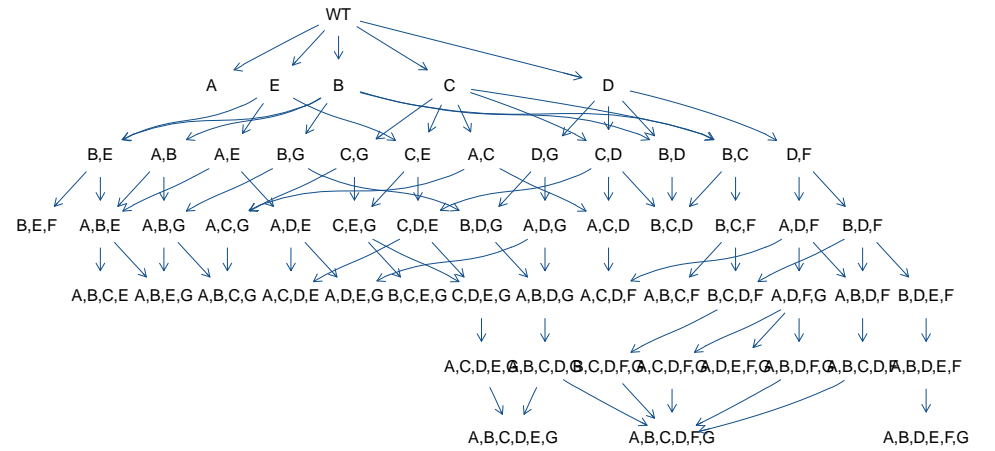

ID 4b99AWrdV4410hdsO  
 acc genotypes 78  
 peaks no back 21  
 removed edges NA  
 prop rem edges NA

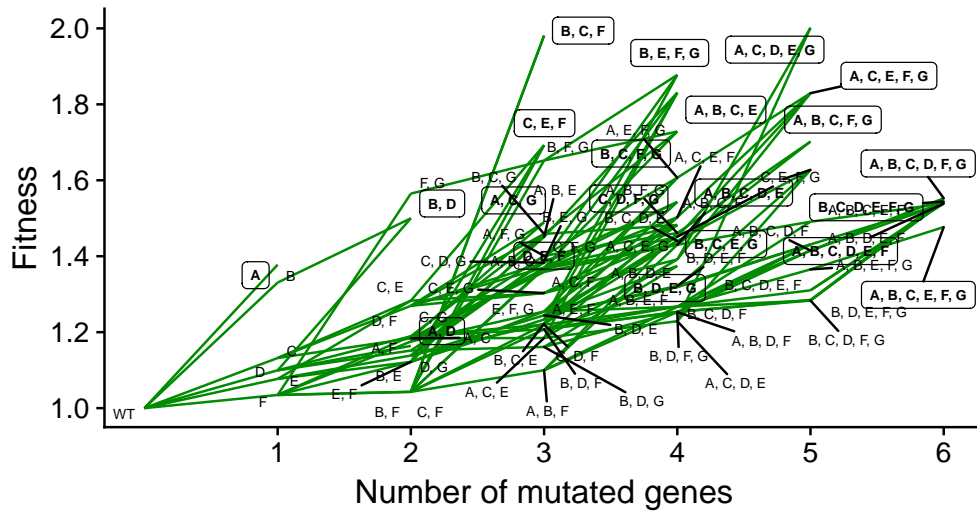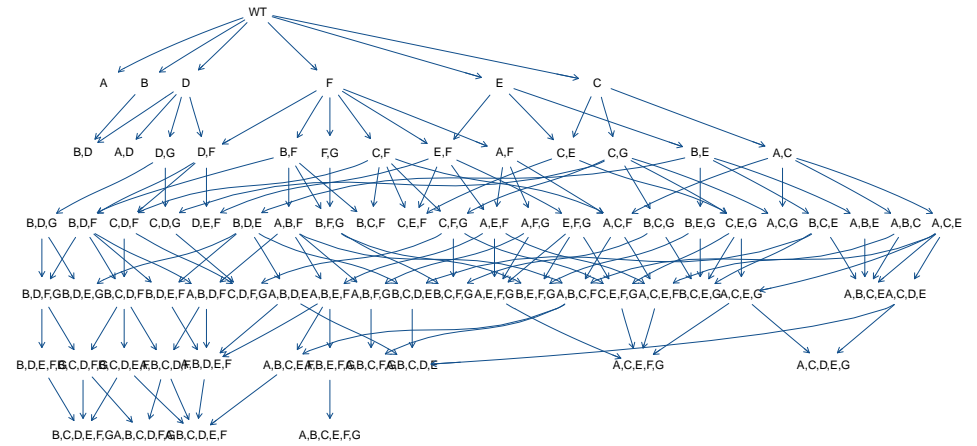

ID 4cDYPNJ8oYbtJWle  
 acc genotypes 50  
 peaks no back 13  
 removed edges NA  
 prop rem edges NA

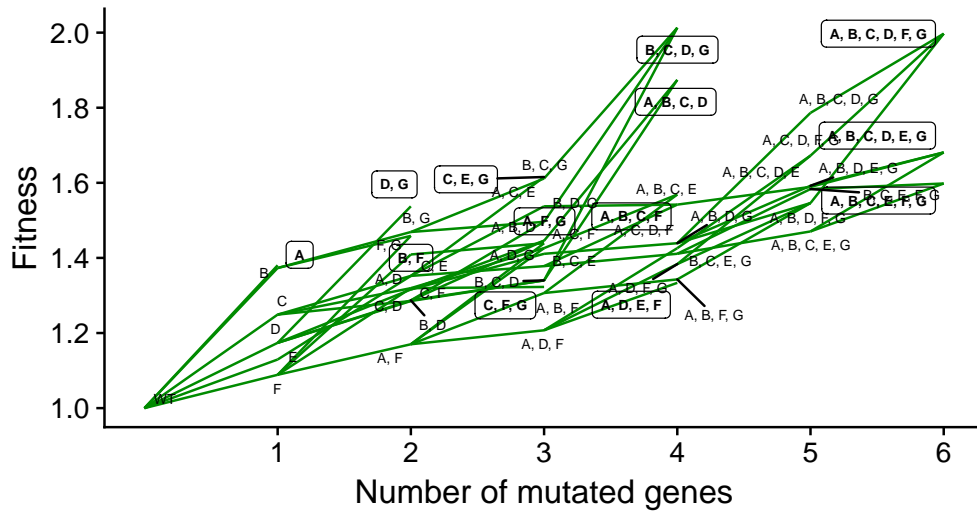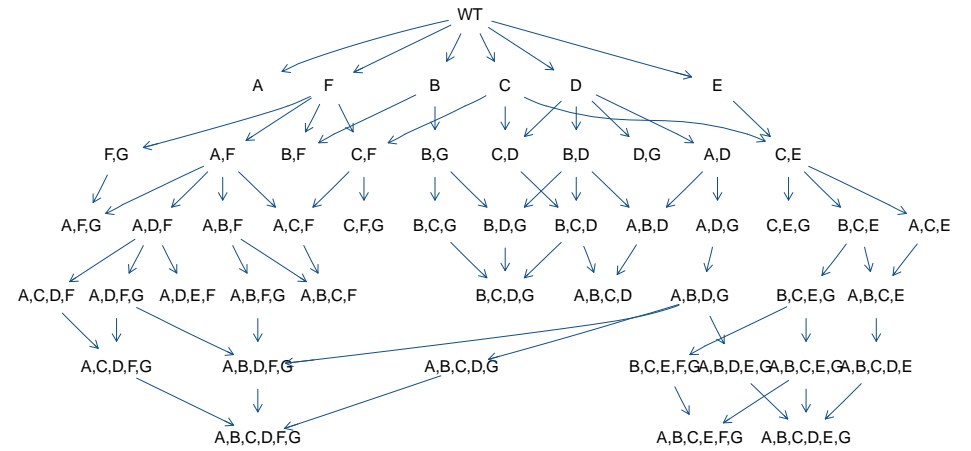

ID 4oM8TrevISckCyjy  
 acc genotypes 17  
 peaks no back 11  
 removed edges NA  
 prop rem edges NA

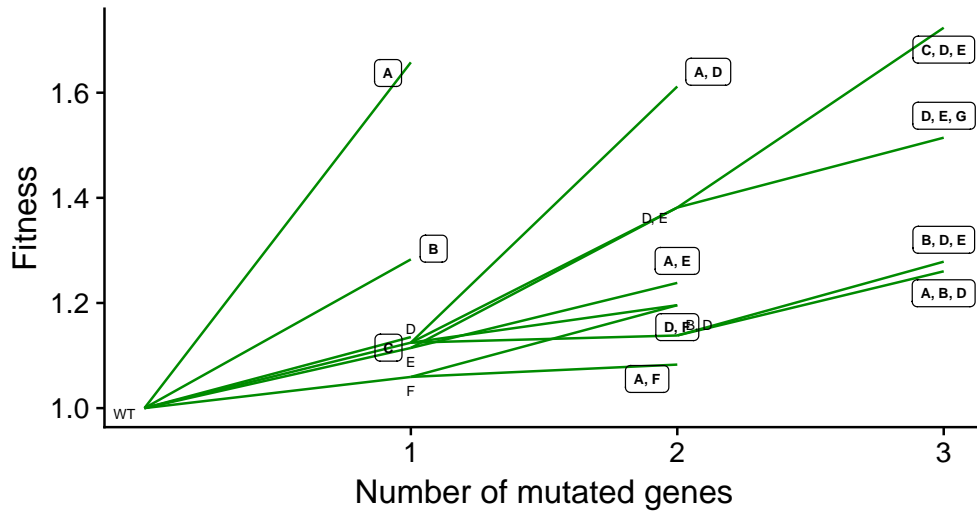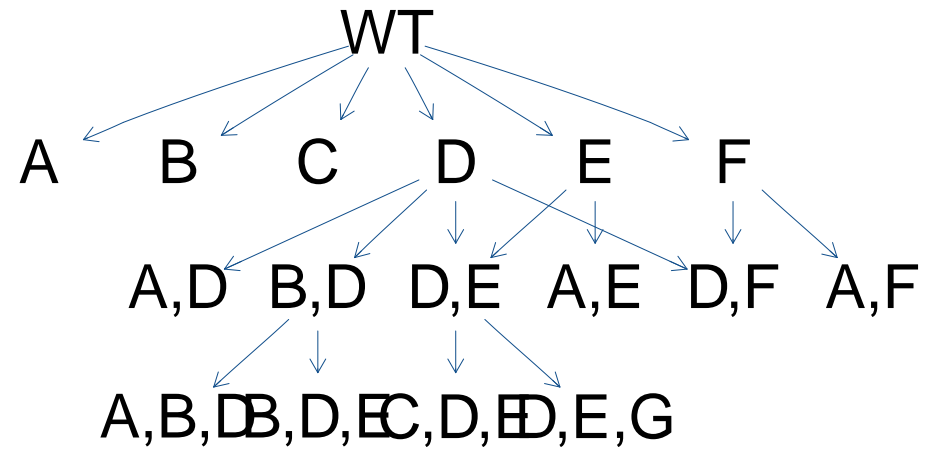





ID 4UvCBrp2StvG6sde  
 acc genotypes 68  
 peaks no back 27  
 removed edges NA  
 prop rem edges NA

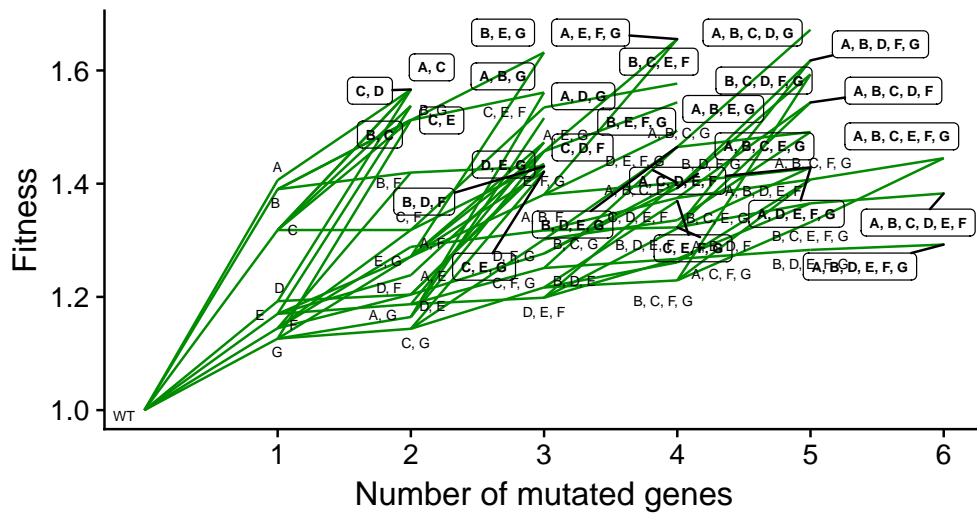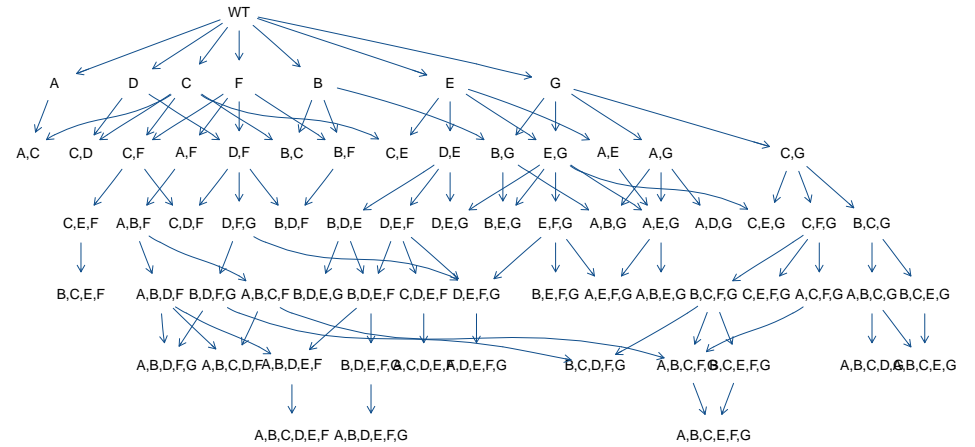

ID 4xoT2TA10PIN1Y8f9  
 acc genotypes 43  
 peaks no back 17  
 removed edges NA  
 prop rem edges NA

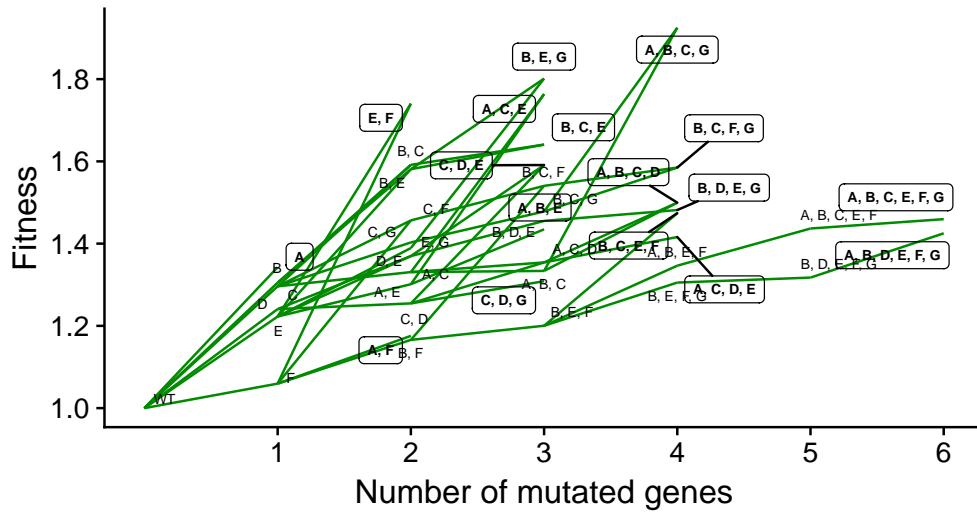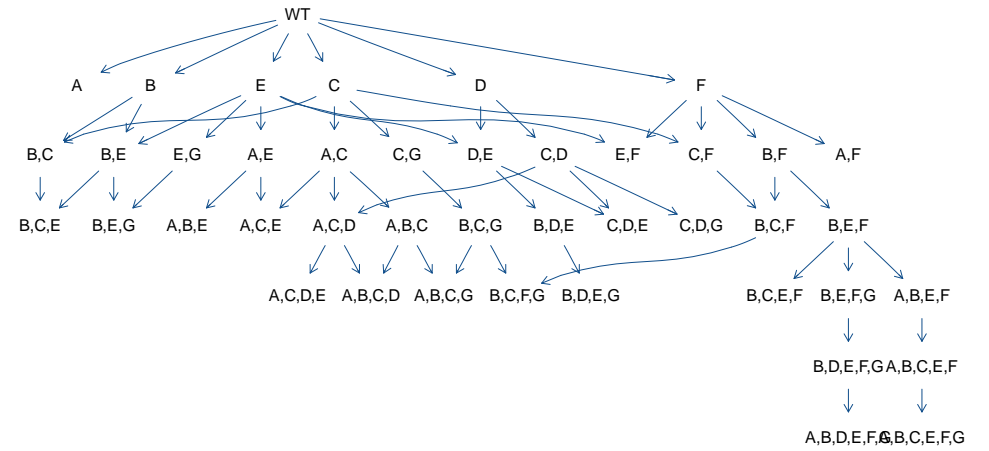

ID 5cropZmgpoQ1ehPe  
 acc genotypes 33  
 peaks no back 13  
 removed edges NA  
 prop rem edges NA

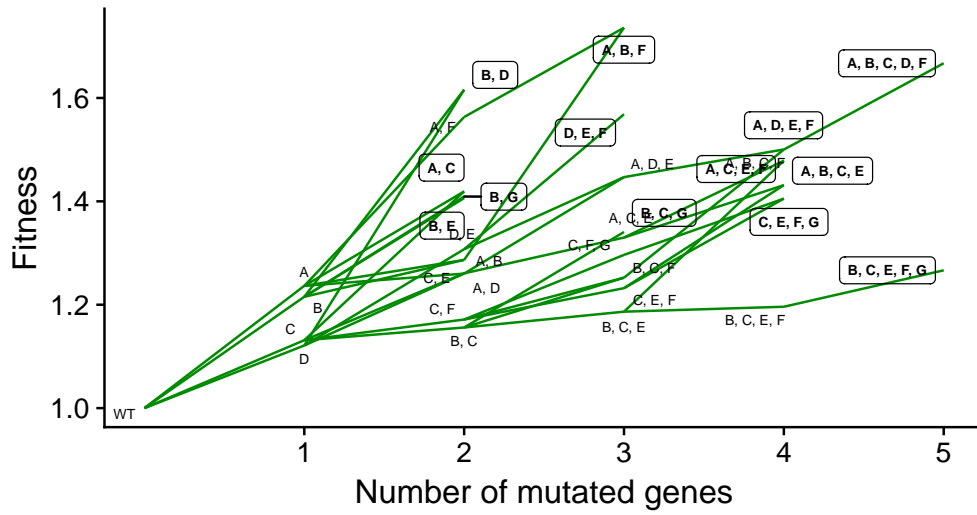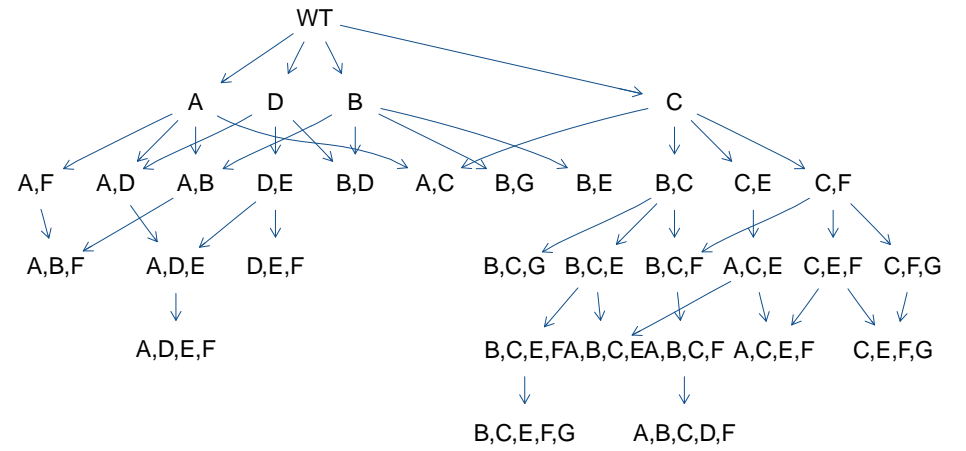

ID 5epf10NPUUcYzNrU9  
 acc genotypes 46  
 peaks no back 7  
 removed edges NA  
 prop rem edges NA

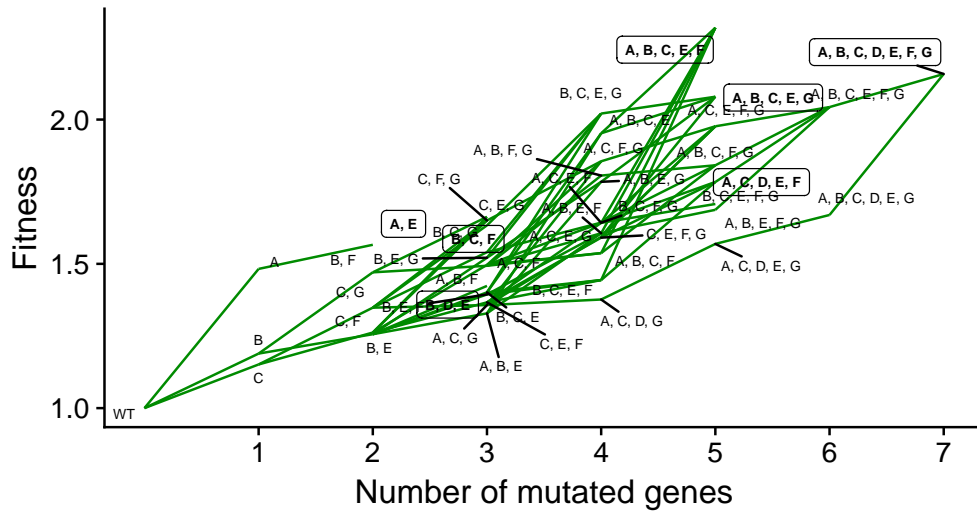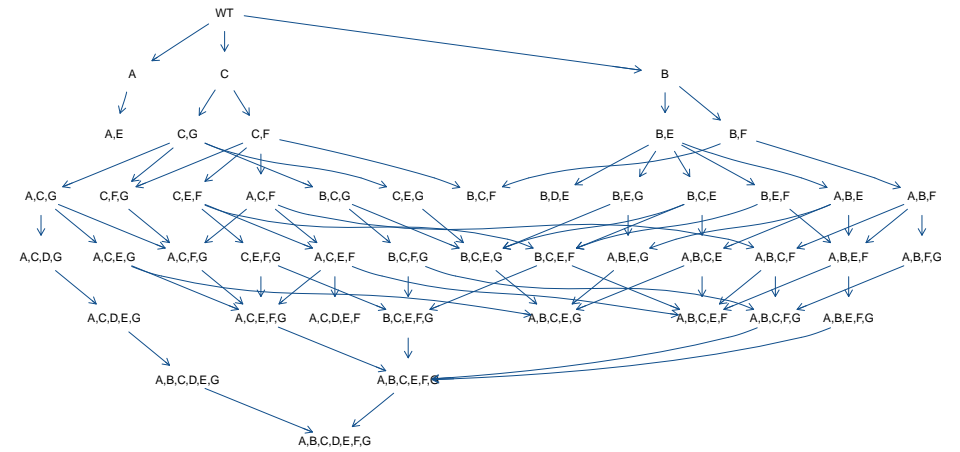

ID 5J10fJoXgI3k5FMVe  
 acc genotypes 81  
 peaks no back 18  
 removed edges NA  
 prop rem edges NA

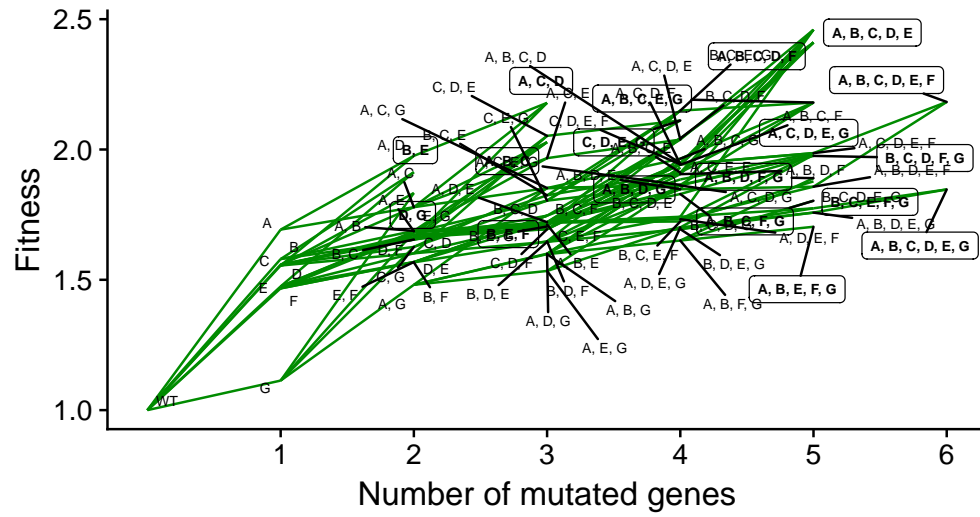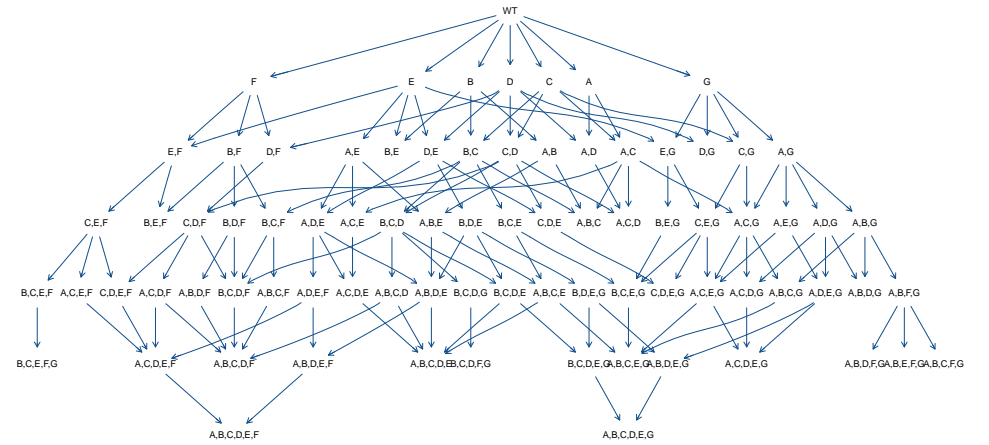

ID 5J6VWoMy7ROI8aOu  
 acc genotypes 72  
 peaks no back 23  
 removed edges NA  
 prop rem edges NA

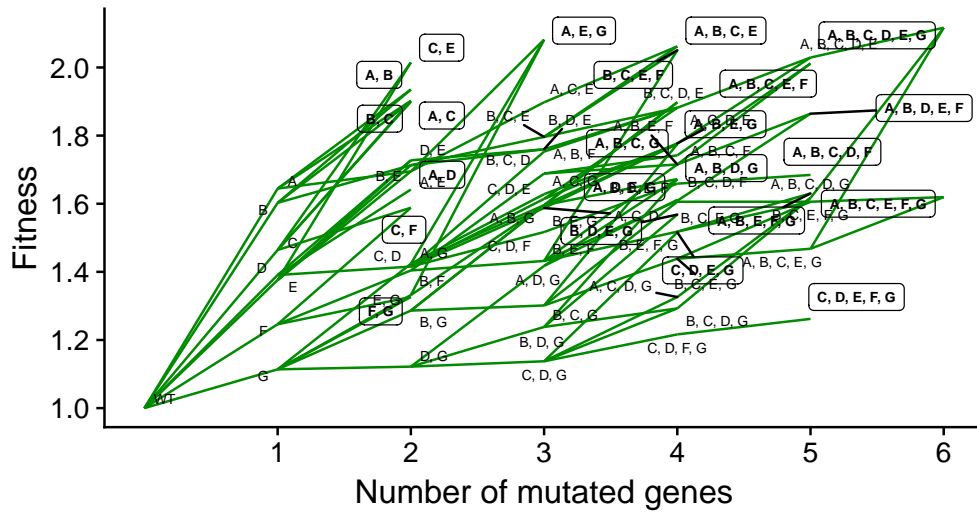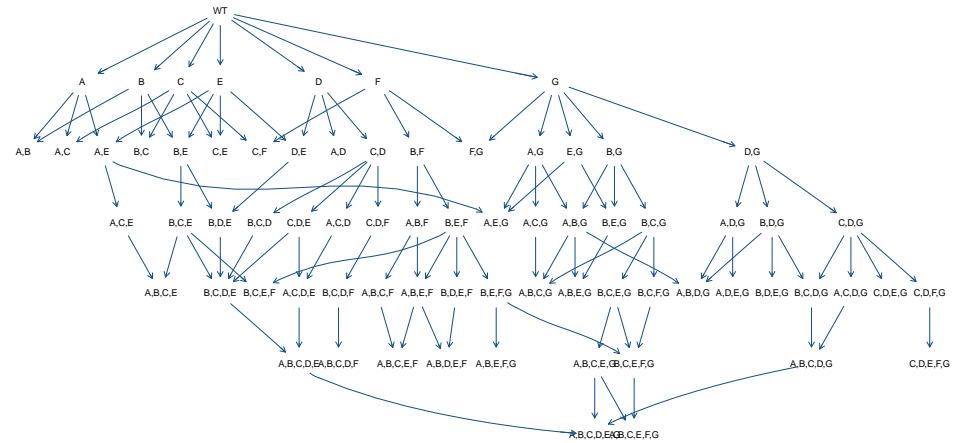

ID 5MozgxpY4MNYCtSZ  
 acc genotypes 80  
 peaks no back 28  
 removed edges NA  
 prop rem edges NA

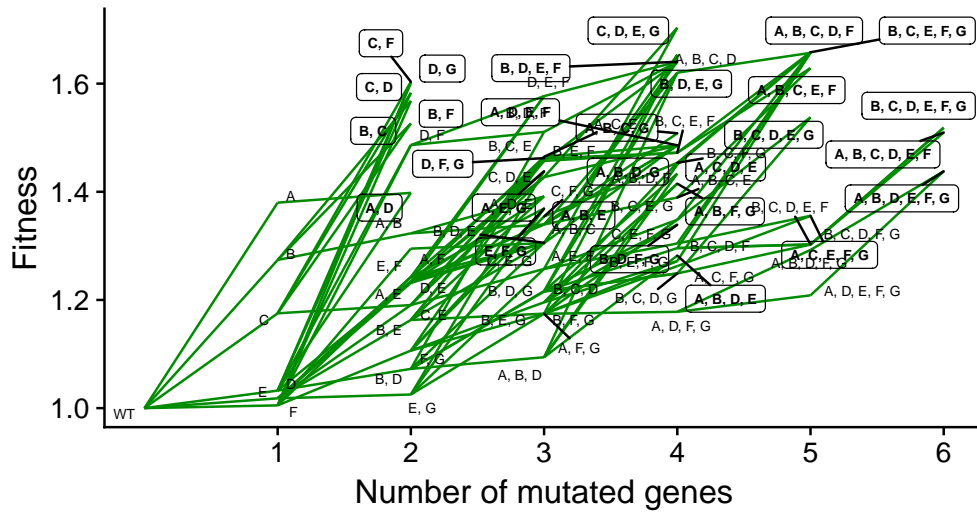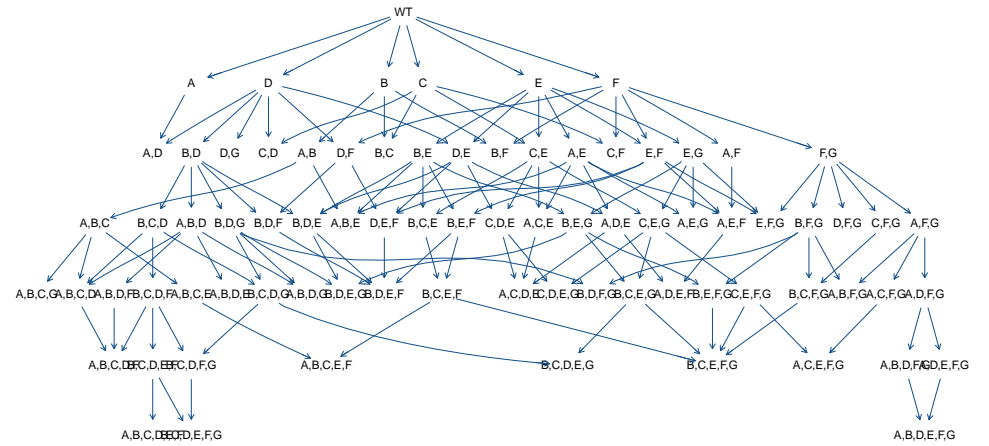





ID 6grkdzP10lm6kQ42g  
 acc genotypes 81  
 peaks no back 12  
 removed edges NA  
 prop rem edges NA

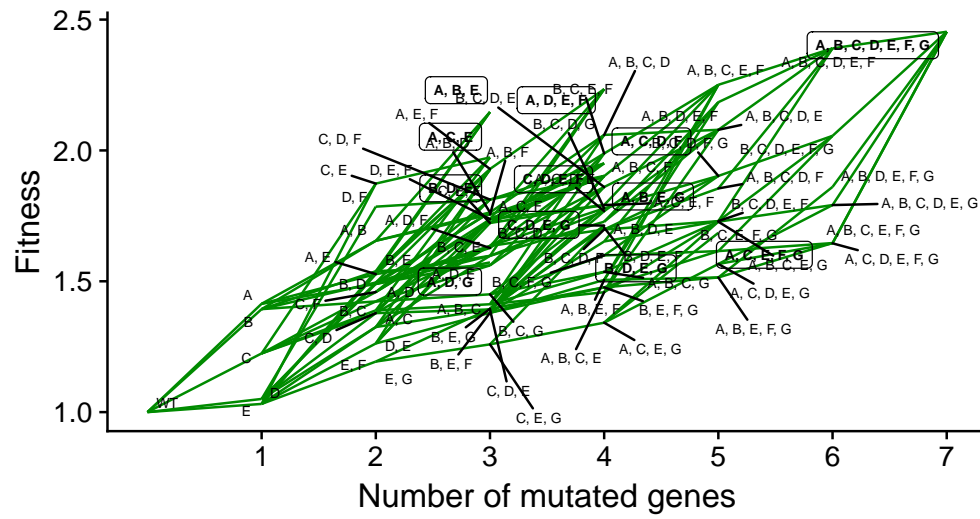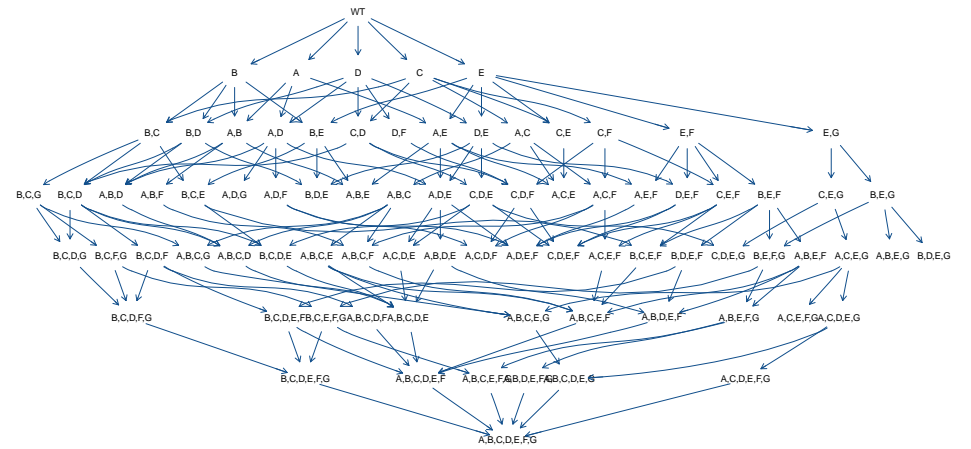

ID 75PXrtvV107d4XbmV  
 acc genotypes 70  
 peaks no back 19  
 removed edges NA  
 prop rem edges NA

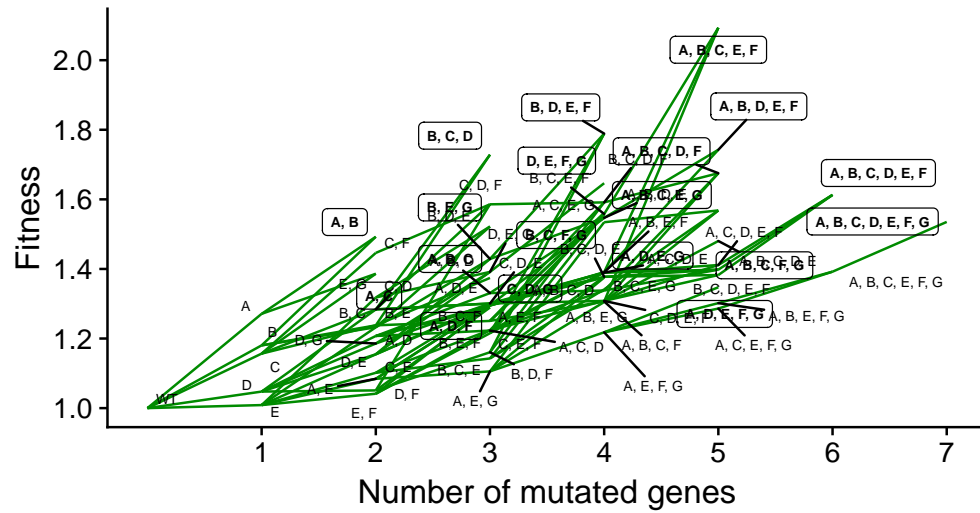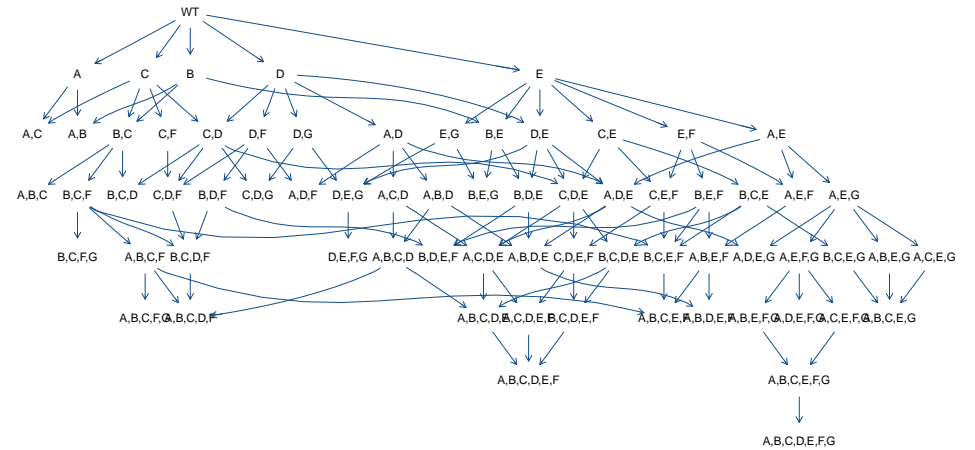

ID 84eRNCZlduWDrCW4  
 acc genotypes 39  
 peaks no back 15  
 removed edges NA  
 prop rem edges NA

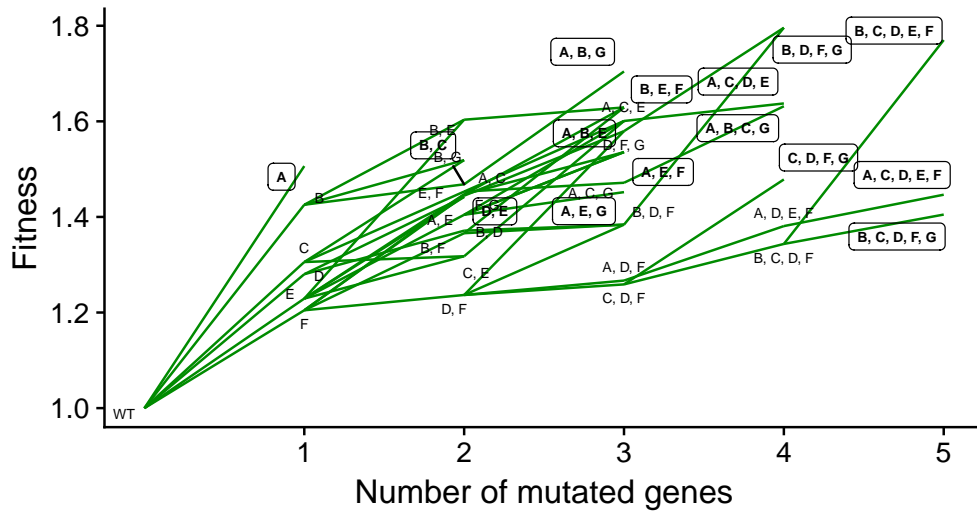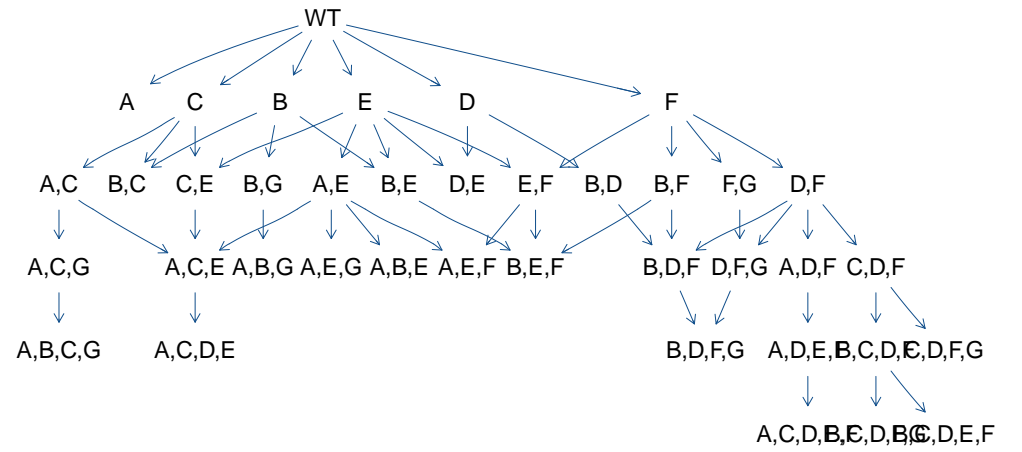

ID 84uleheQaYaVNux8  
 acc genotypes 18  
 peaks no back 6  
 removed edges NA  
 prop rem edges NA

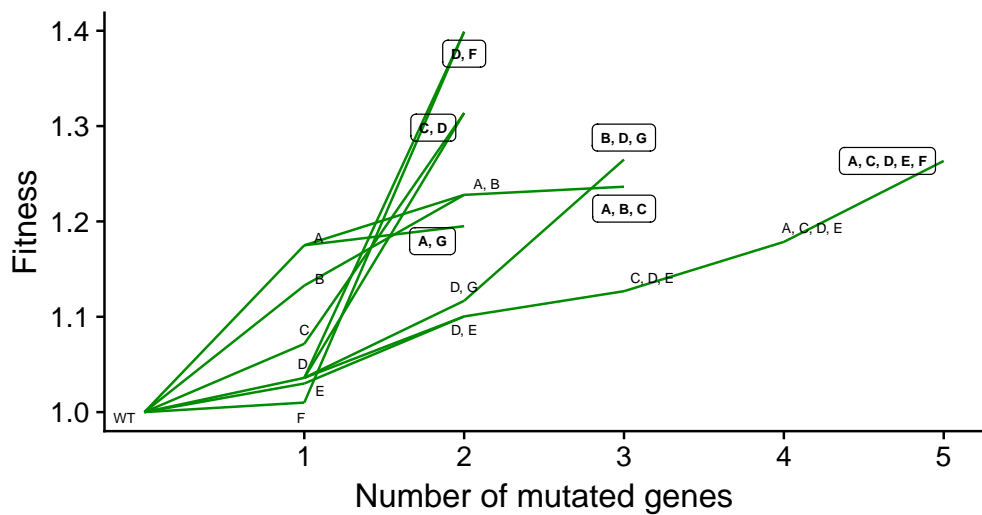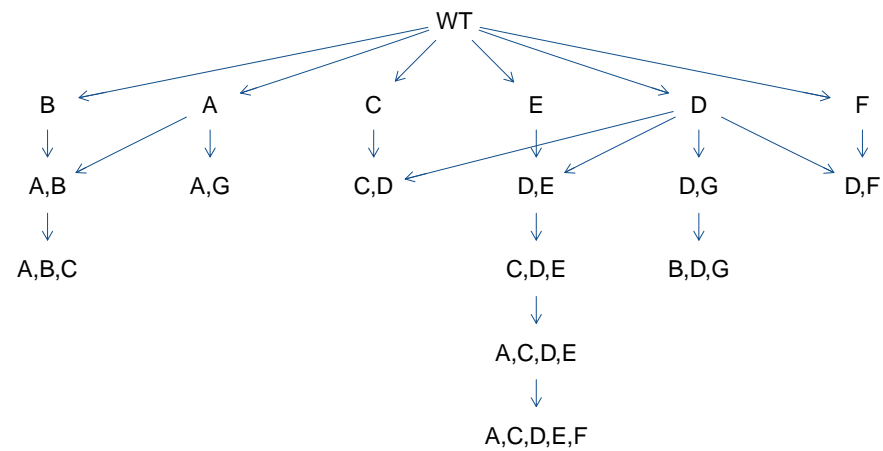

ID 8a9vNJyhKyFzgtGI  
 acc genotypes 29  
 peaks no back 6  
 removed edges NA  
 prop rem edges NA

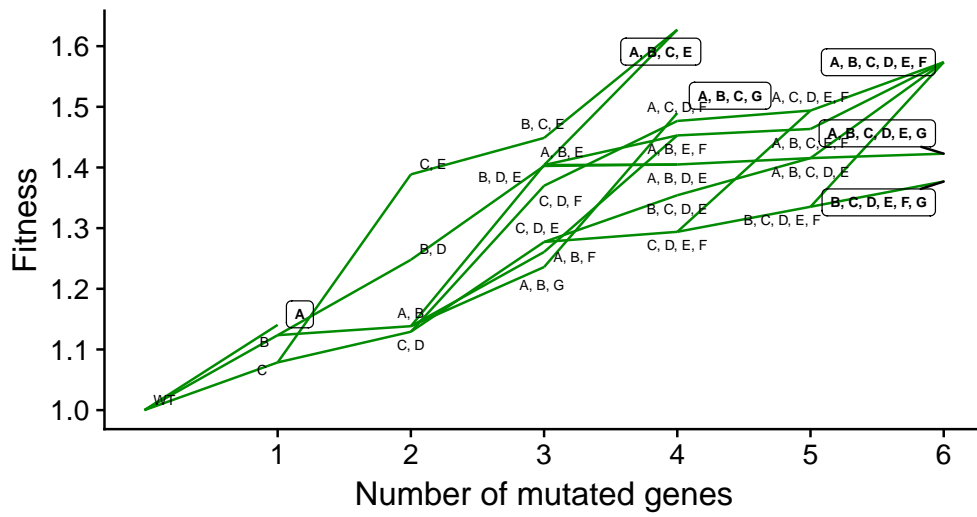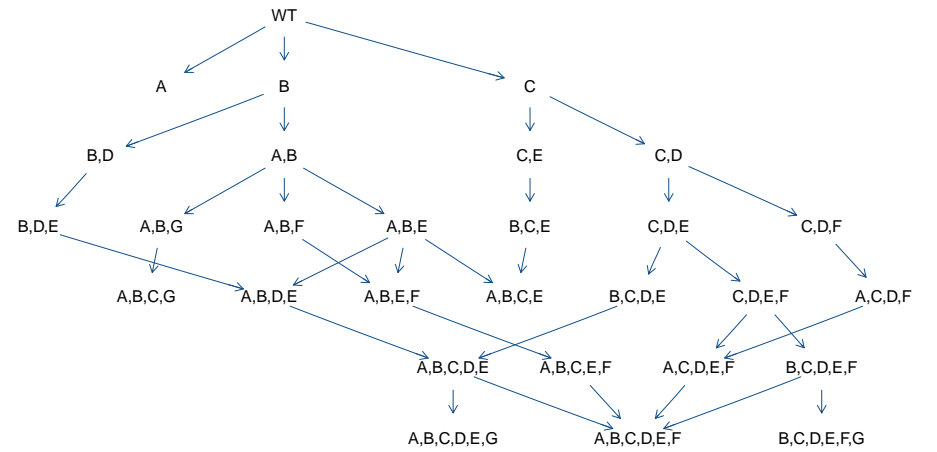

ID 8UysAOd1WpNJ6JEA  
acc genotypes 67  
peaks no back 15  
removed edges NA  
prop rem edges NA

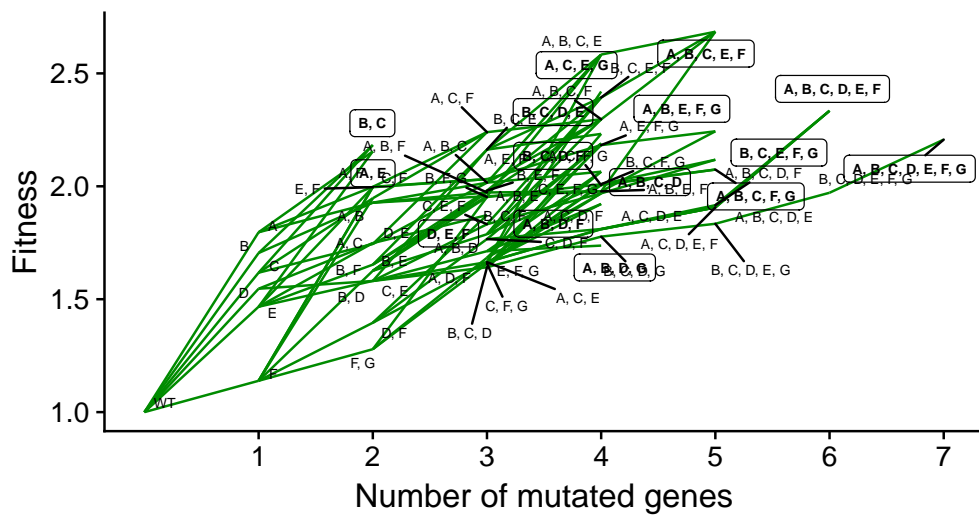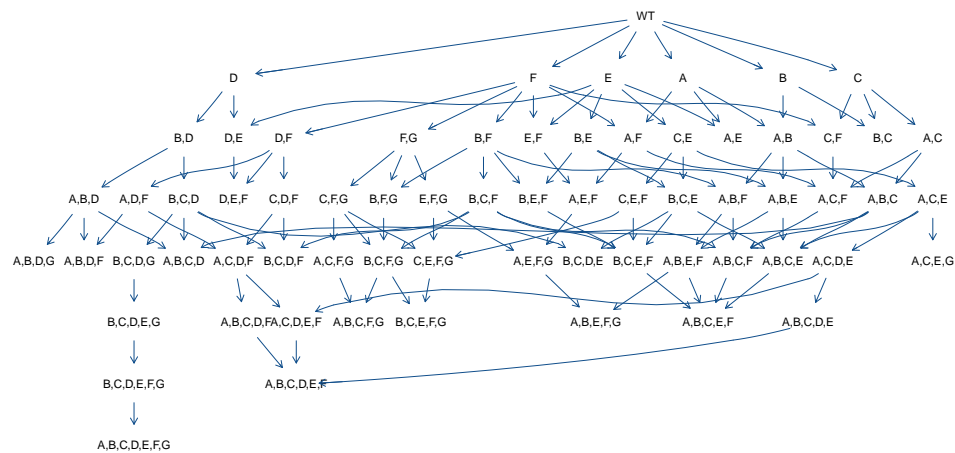

ID 8yQFIKWNFgRitlOW  
 acc genotypes 40  
 peaks no back 18  
 removed edges NA  
 prop rem edges NA

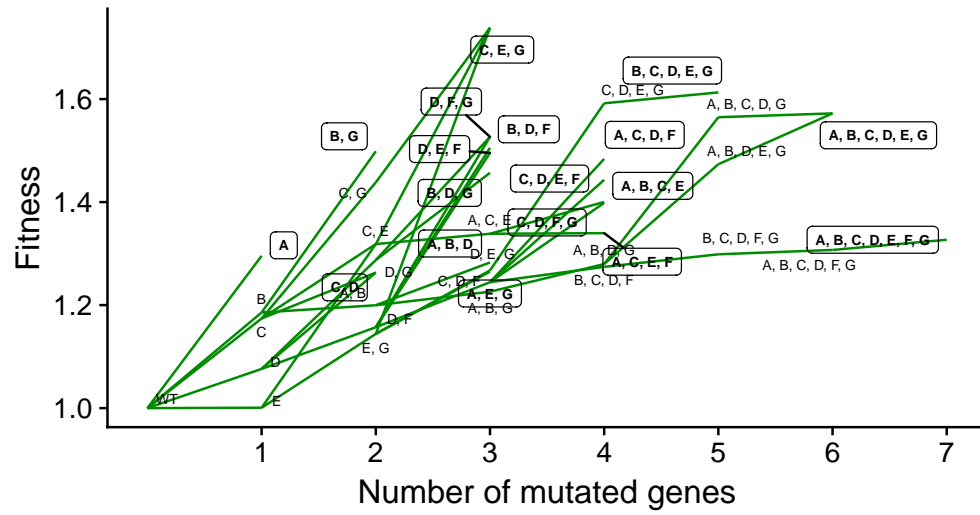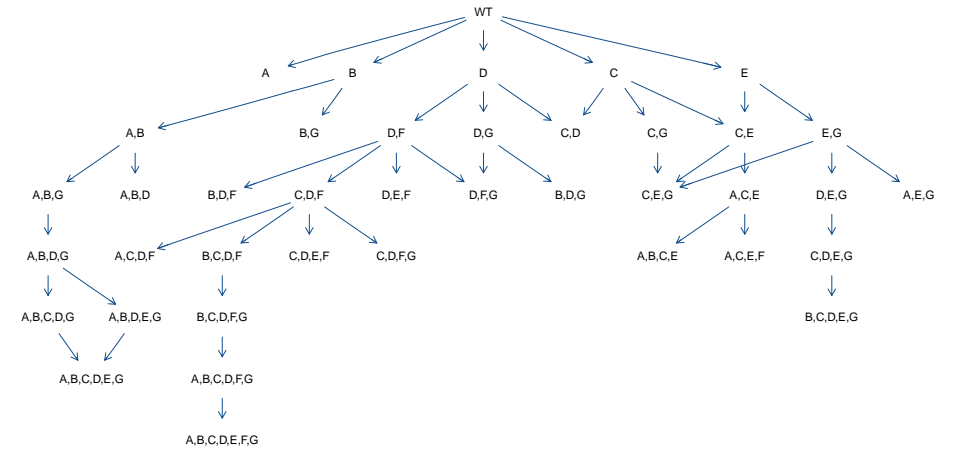



ID 98Ltpa3IXTnc4zbC  
 acc genotypes 29  
 peaks no back 12  
 removed edges NA  
 prop rem edges NA

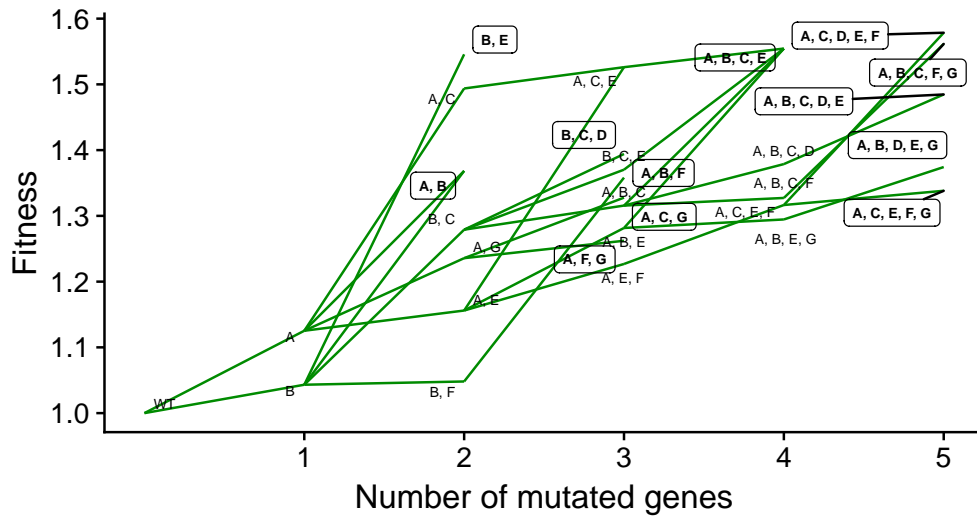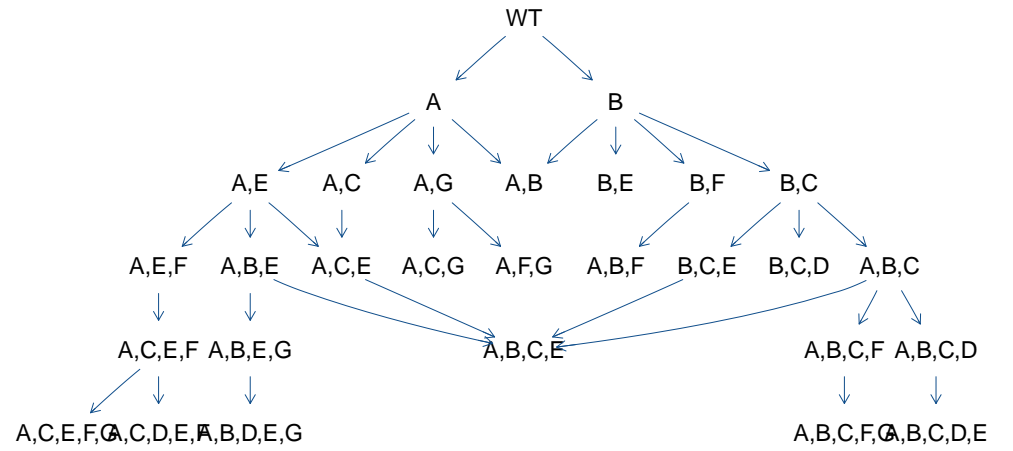



ID 9MBO3qg10BvSTzUqM  
 acc genotypes 52  
 peaks no back 15  
 removed edges NA  
 prop rem edges NA

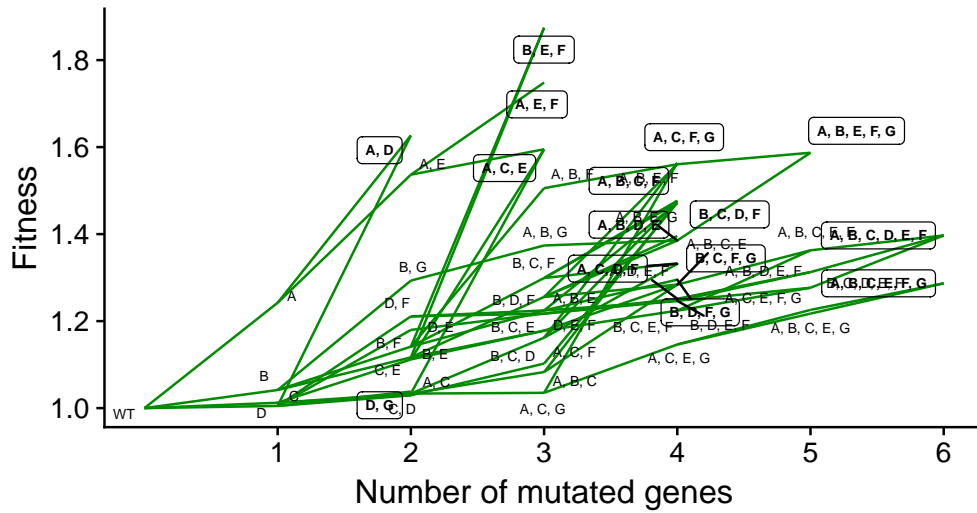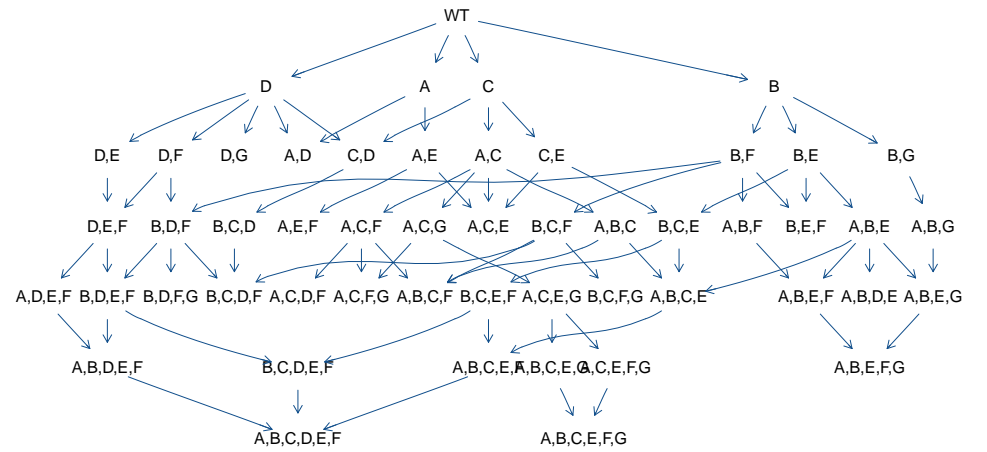

ID 9rebvjtcu7f5fc6O  
 acc genotypes 38  
 peaks no back 12  
 removed edges NA  
 prop rem edges NA

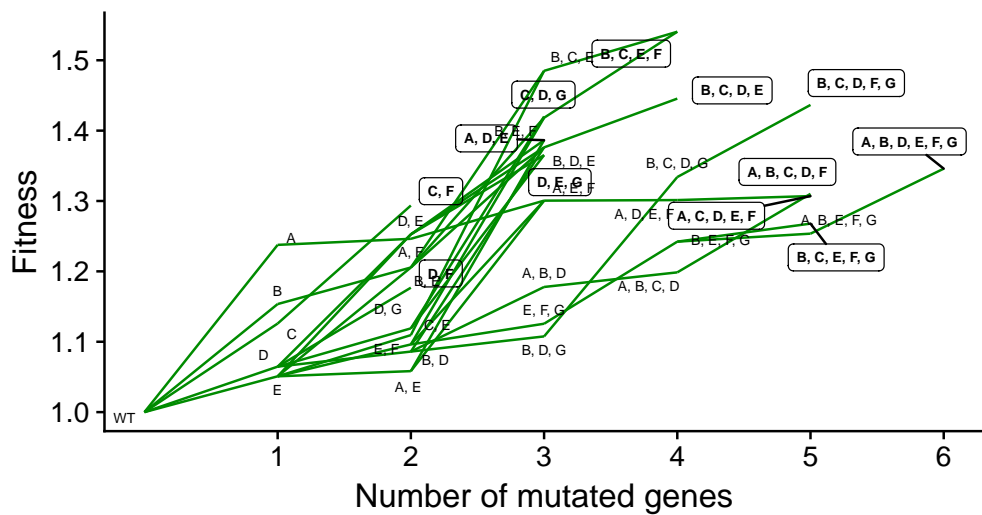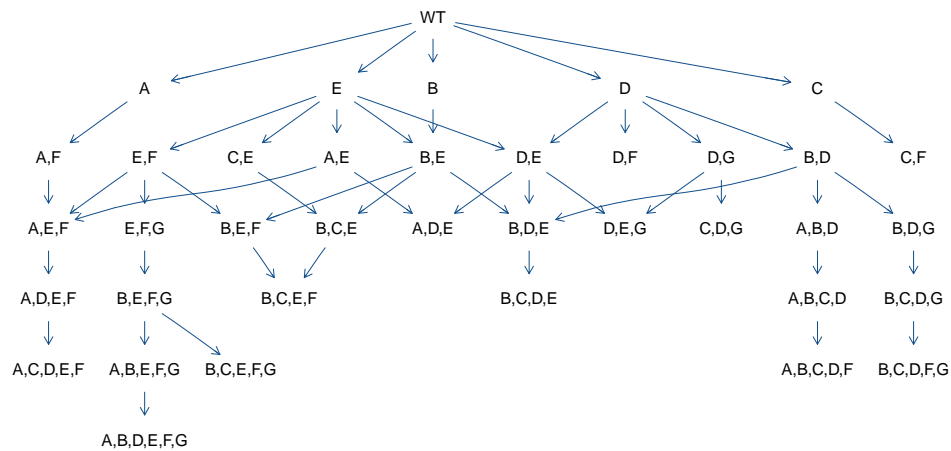

ID [A3LridXjUIno4iNV](#)  
 acc genotypes **77**  
 peaks no back 19  
 removed edges NA  
 prop rem edges NA

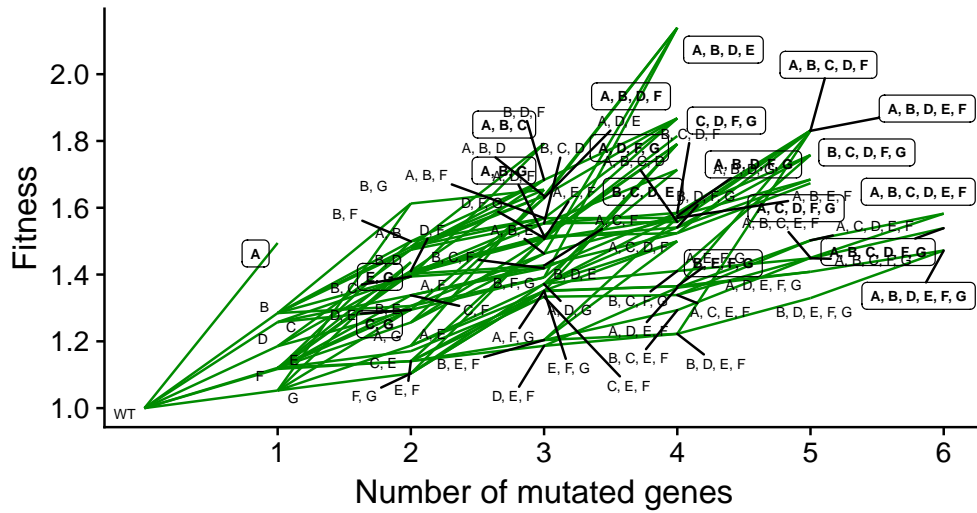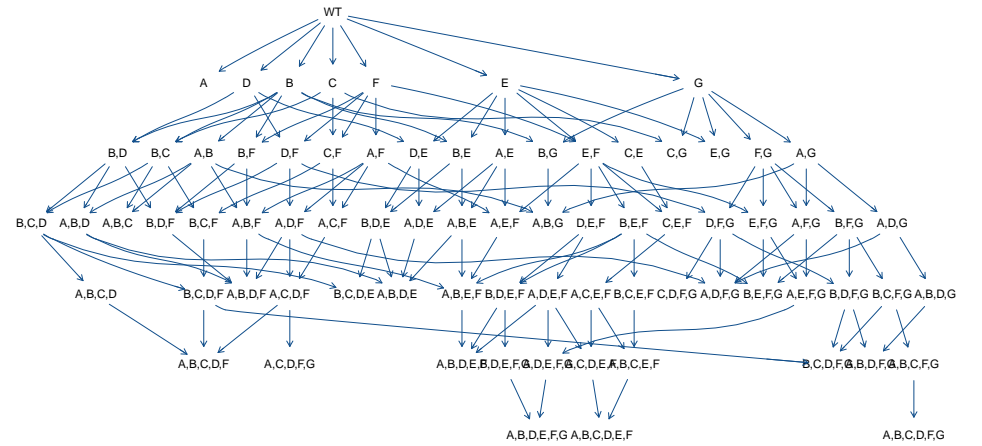

ID aA3KFQazfmWZIKVN  
 acc genotypes 54  
 peaks no back 20  
 removed edges NA  
 prop rem edges NA

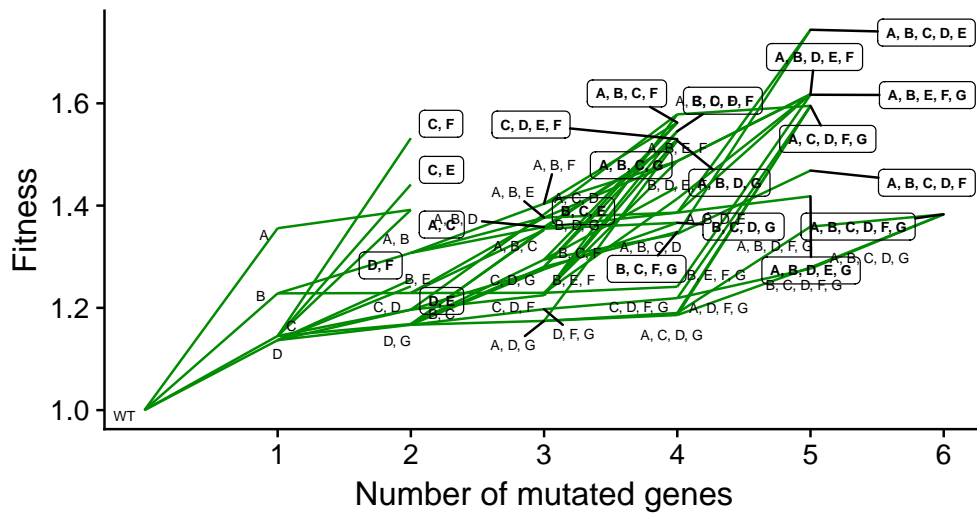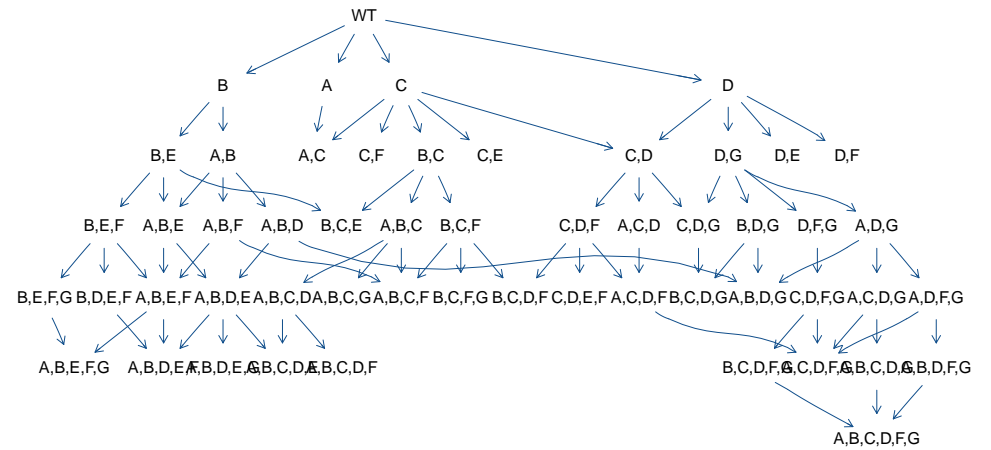

|                |                  |
|----------------|------------------|
| ID             | ACGaLODBO3L7xXPK |
| acc genotypes  | 70               |
| peaks no back  | 19               |
| removed edges  | NA               |
| prop rem edges | NA               |

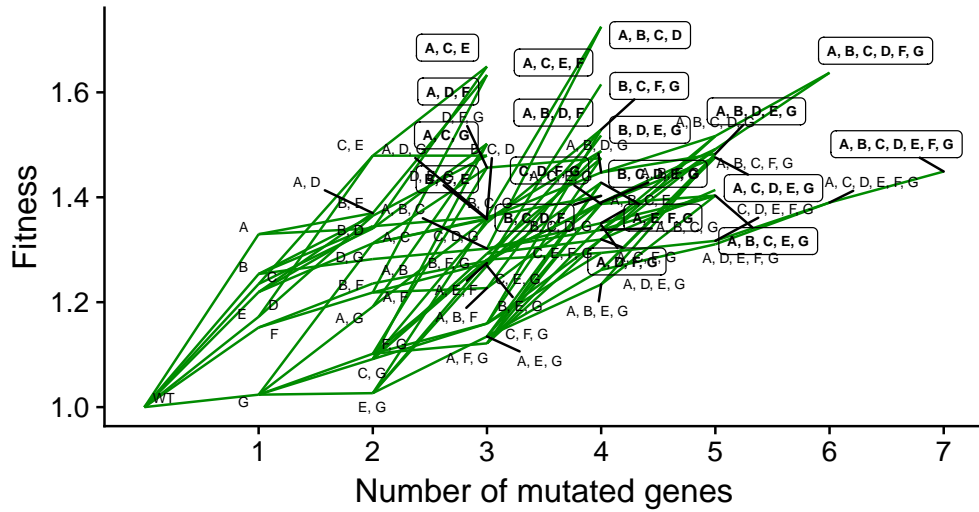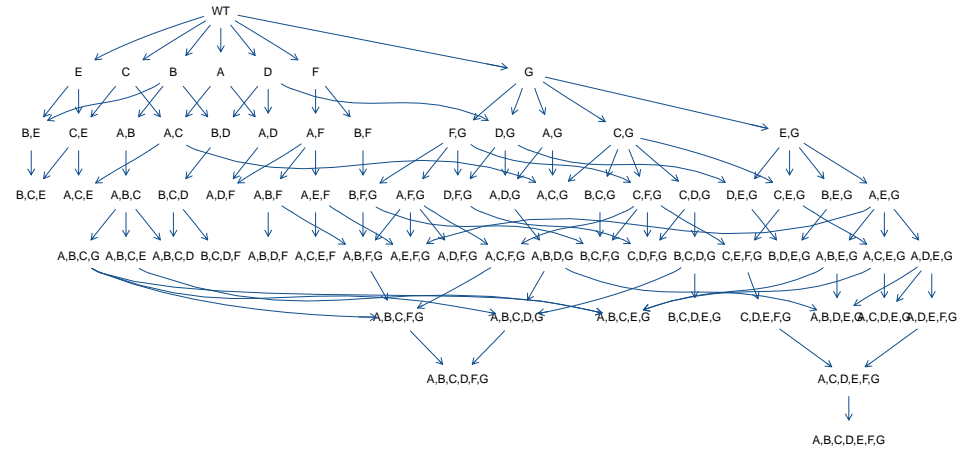

ID AdIPqP6mnr9aElyf  
 acc genotypes 19  
 peaks no back 8  
 removed edges NA  
 prop rem edges NA

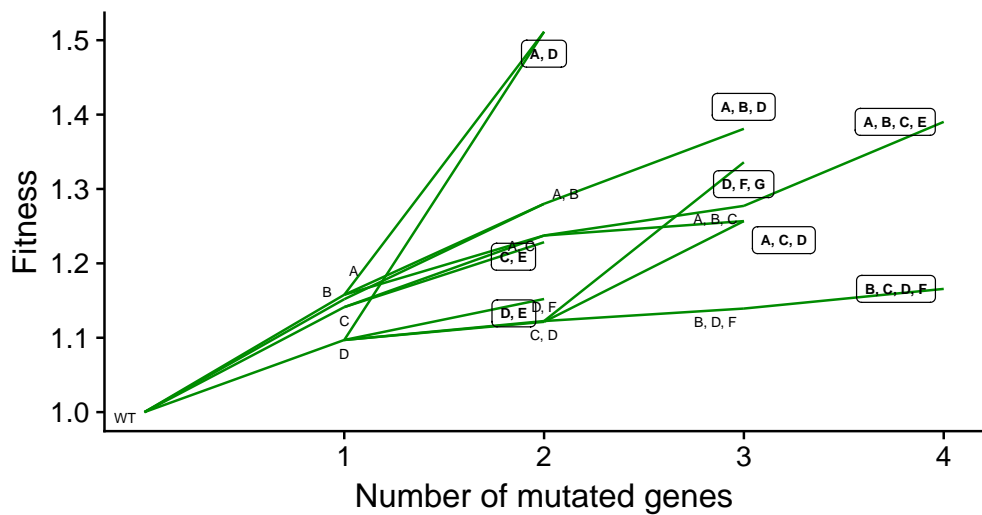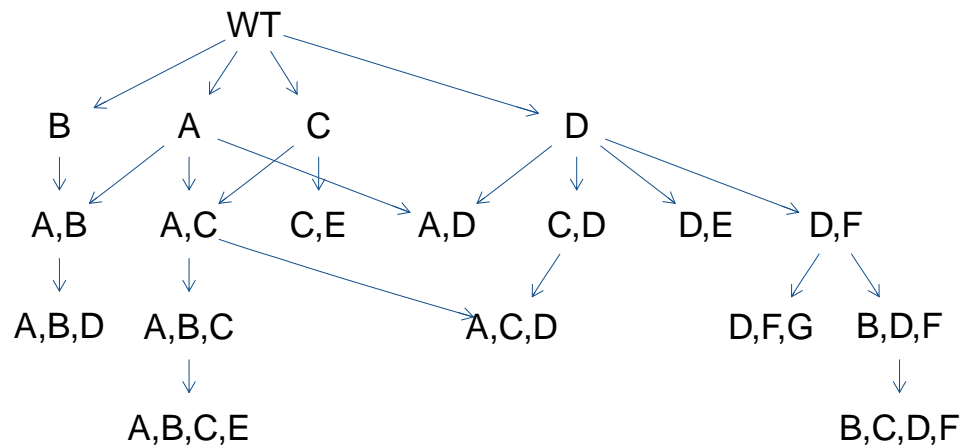



ID aeQvEQMAOMIDD5Ee  
 acc genotypes 49  
 peaks no back 20  
 removed edges NA  
 prop rem edges NA

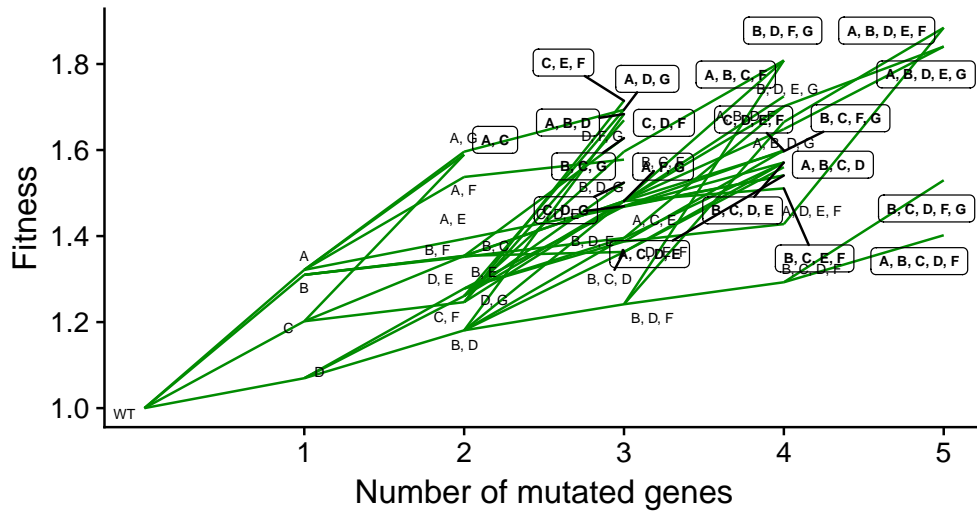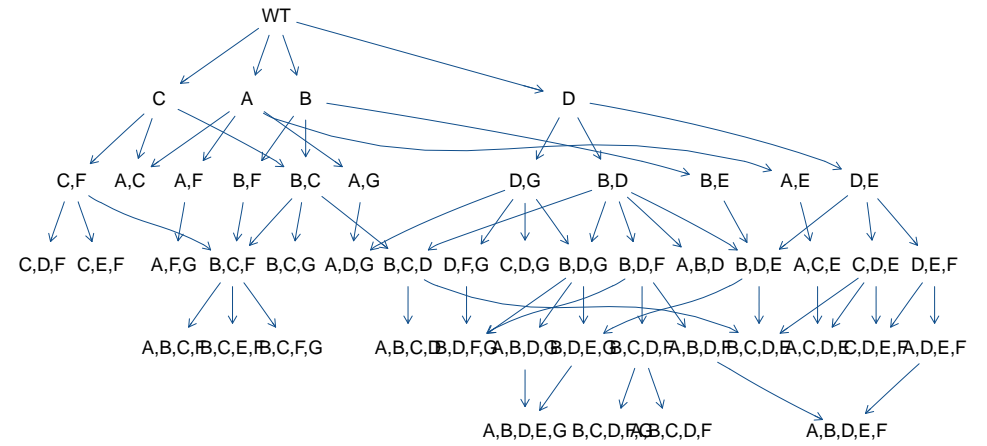

ID **AqnbiWCAFM6eogfg**  
 acc genotypes **17**  
 peaks no back **6**  
 removed edges **NA**  
 prop rem edges **NA**

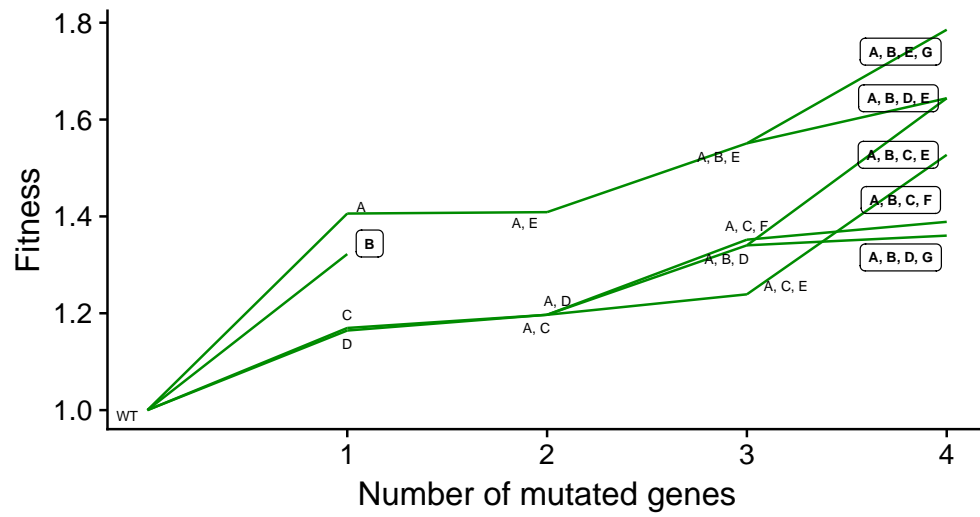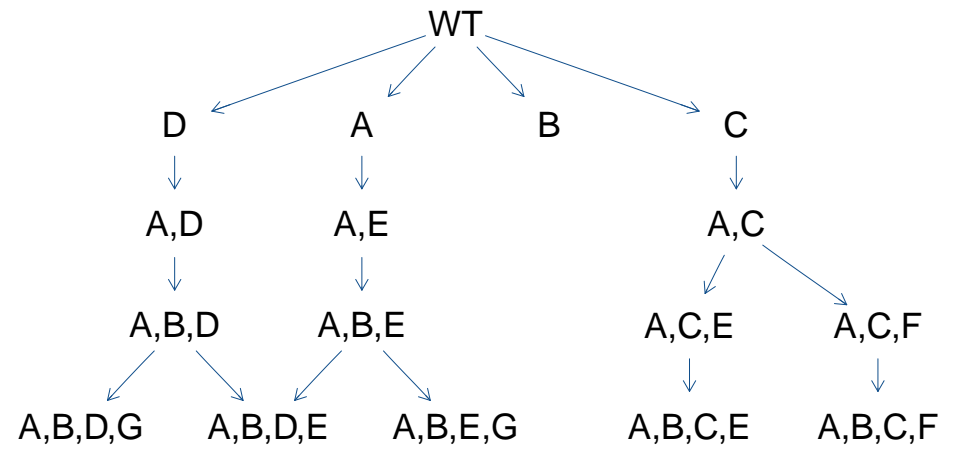

ID aVdtnwMxlBa9JGAI  
 acc genotypes 48  
 peaks no back 14  
 removed edges NA  
 prop rem edges NA

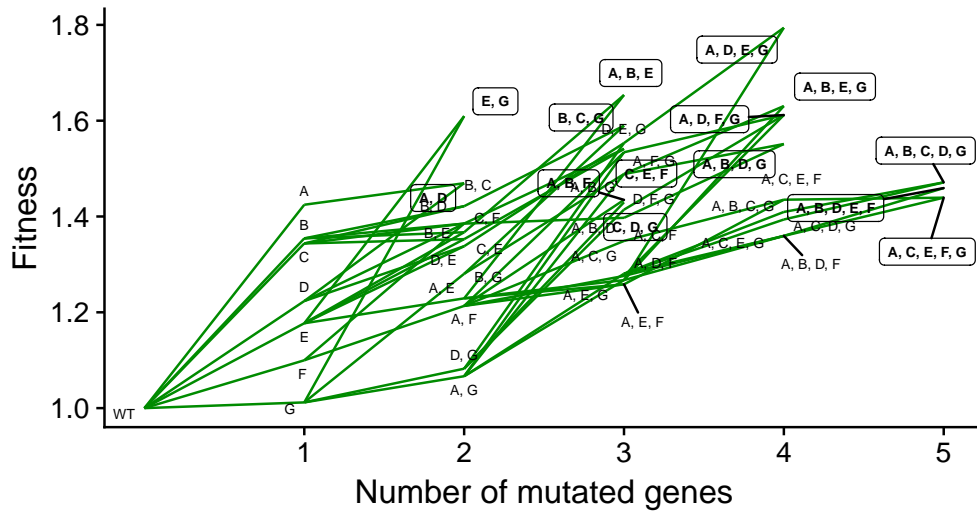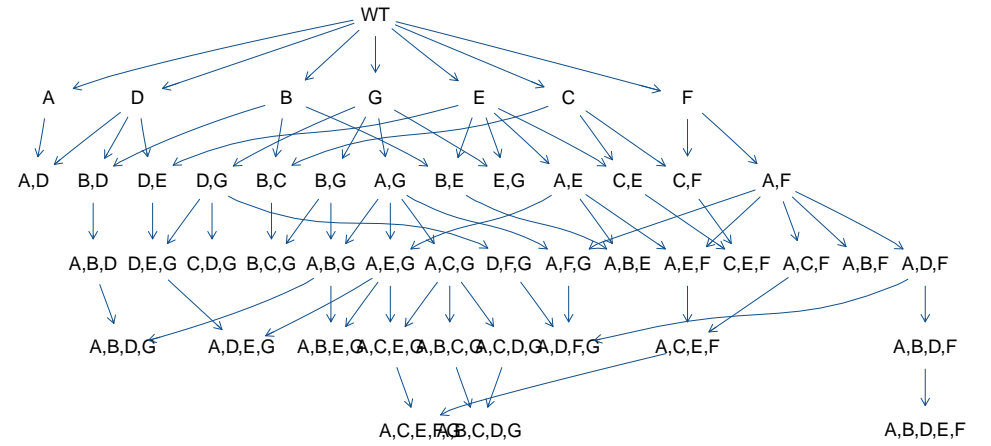



ID [AyannCS2nwfQ2TDC](#)  
 acc genotypes 25  
 peaks no back 9  
 removed edges NA  
 prop rem edges NA

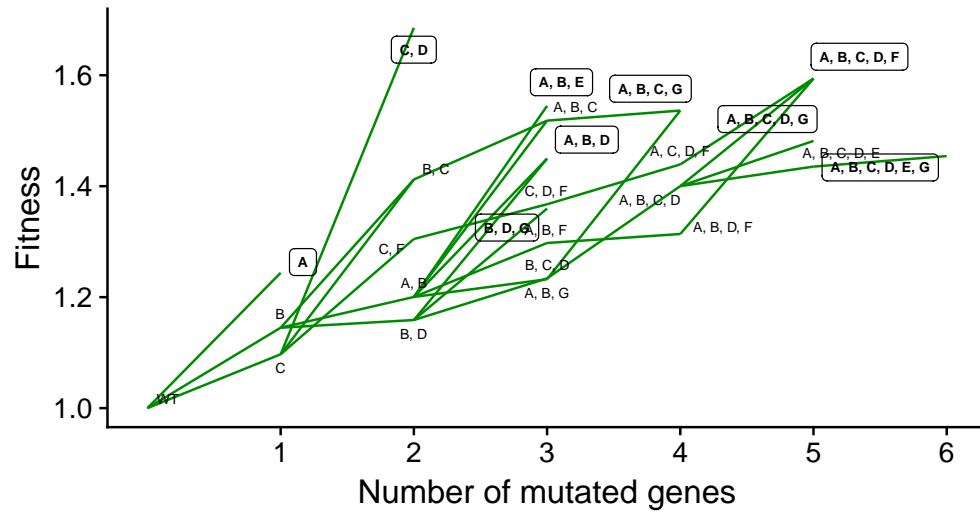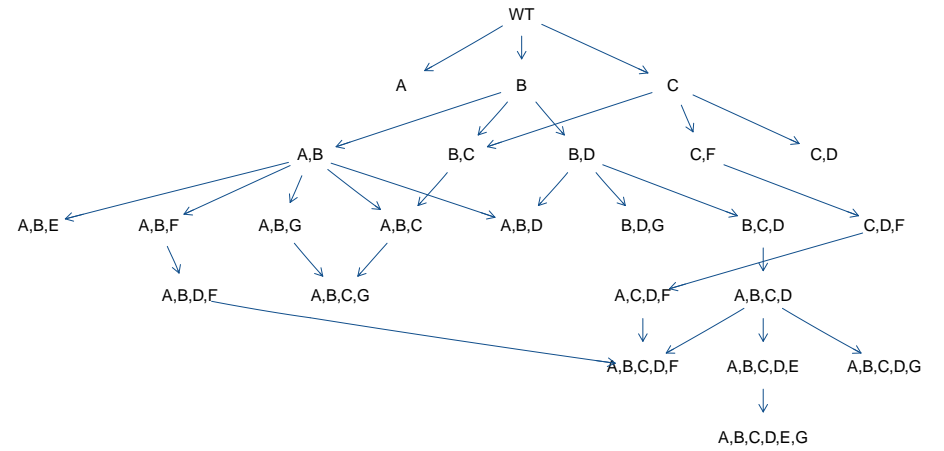

ID aZQI57105TWpukXI1  
 acc genotypes 22  
 peaks no back 10  
 removed edges NA  
 prop rem edges NA

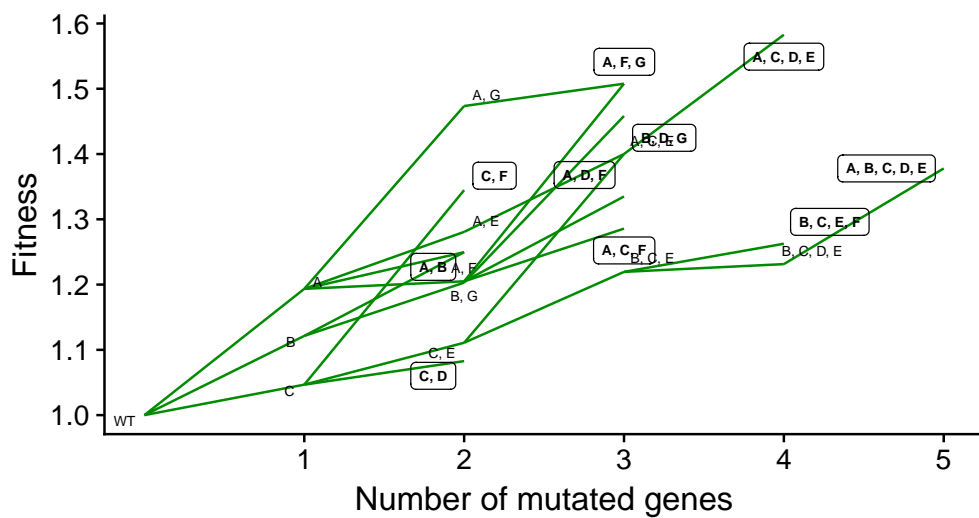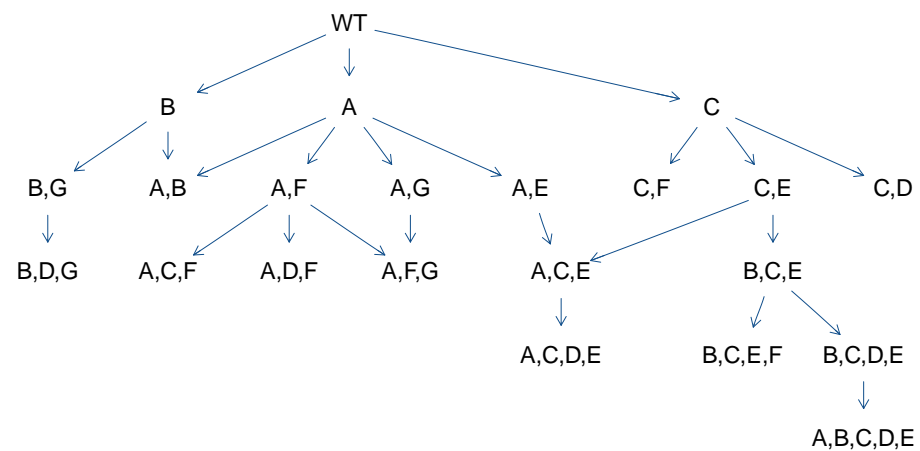

ID **BD3duuYOmGuZZNvr**  
 acc genotypes **14**  
 peaks no back **6**  
 removed edges **NA**  
 prop rem edges **NA**

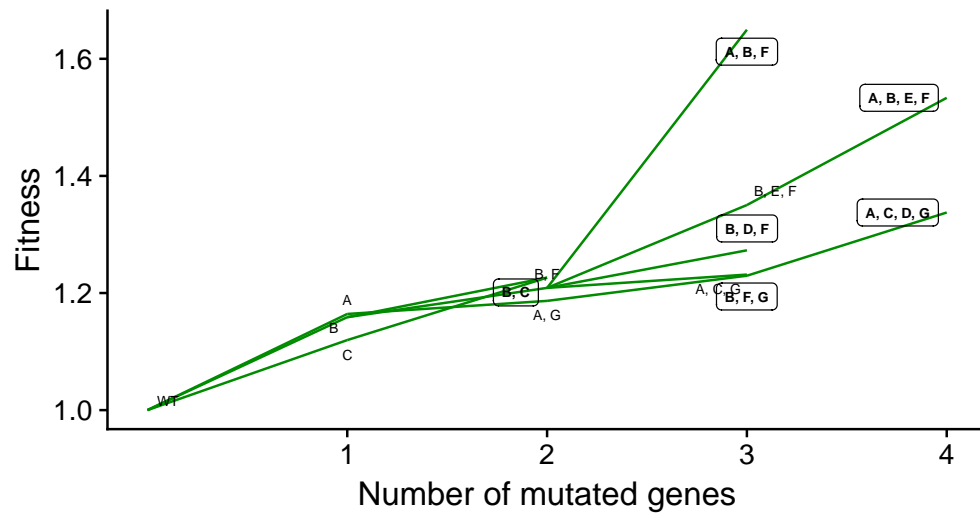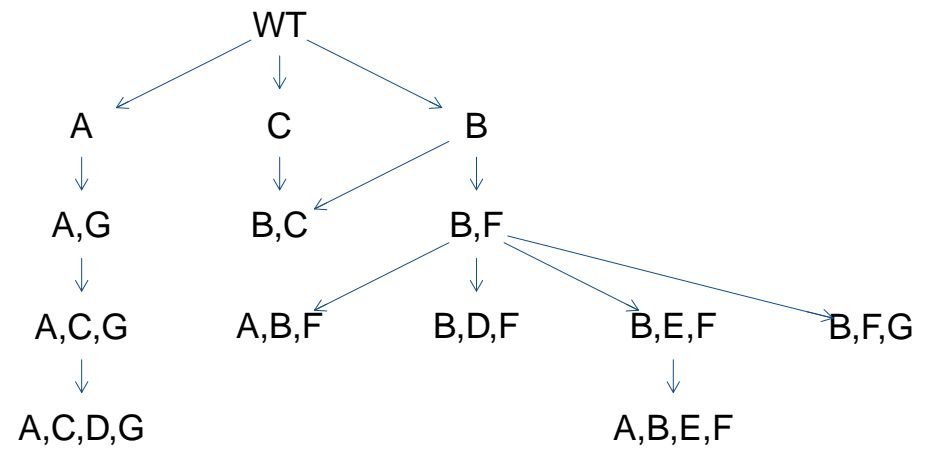

ID [BfGQkzq8zBGWdITj](#)  
 acc genotypes 18  
 peaks no back 7  
 removed edges NA  
 prop rem edges NA

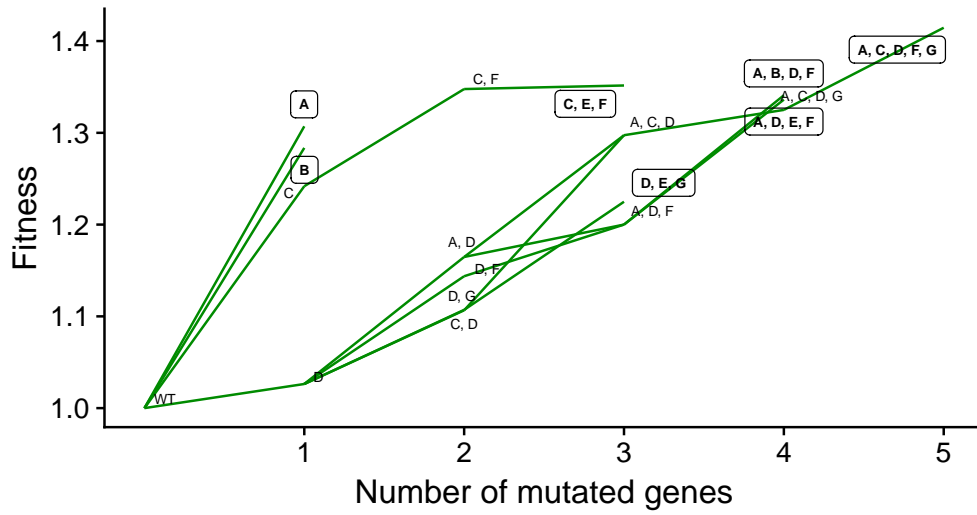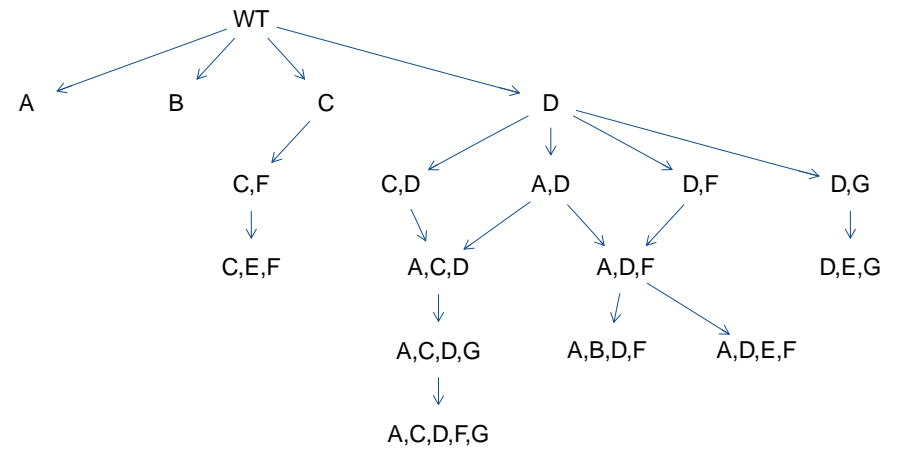



ID [bIGKwHhjkye10mrvq](#)  
 acc genotypes 85  
 peaks no back 10  
 removed edges NA  
 prop rem edges NA

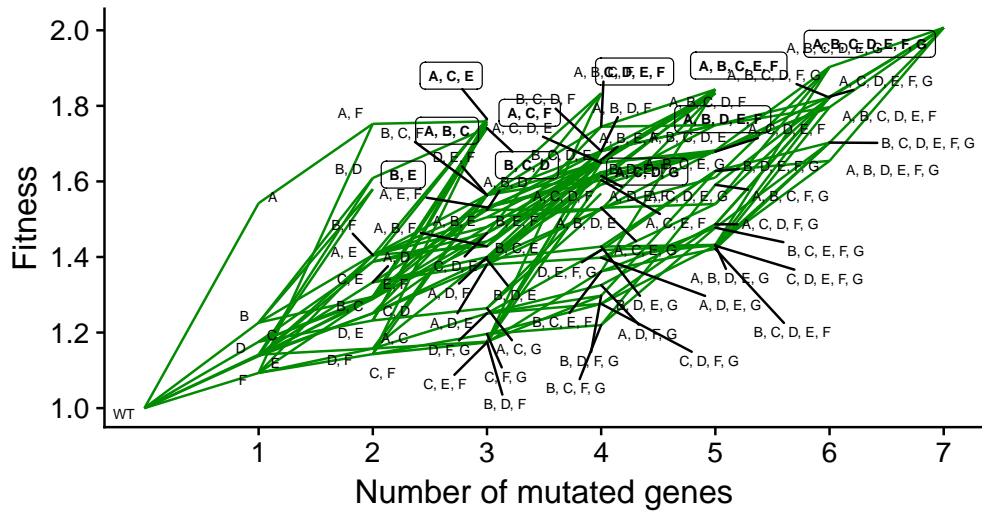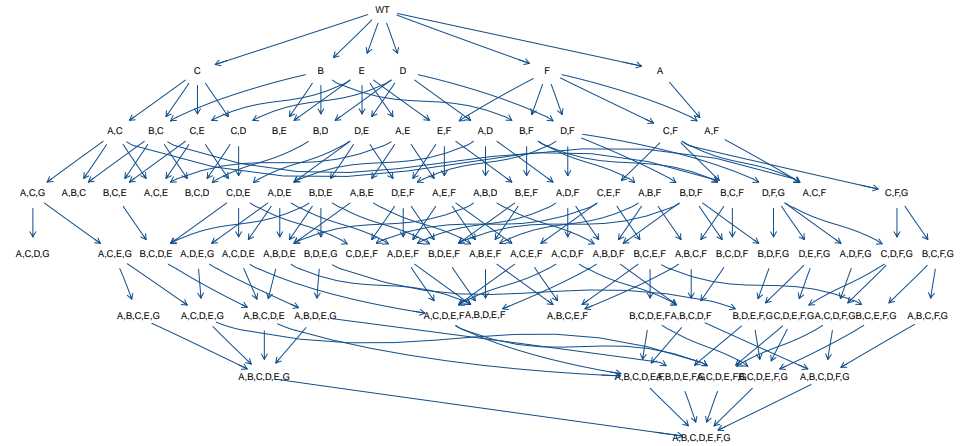

ID **bpM86wHSqemVZQ1G**  
 acc genotypes **57**  
 peaks no back **18**  
 removed edges **NA**  
 prop rem edges **NA**

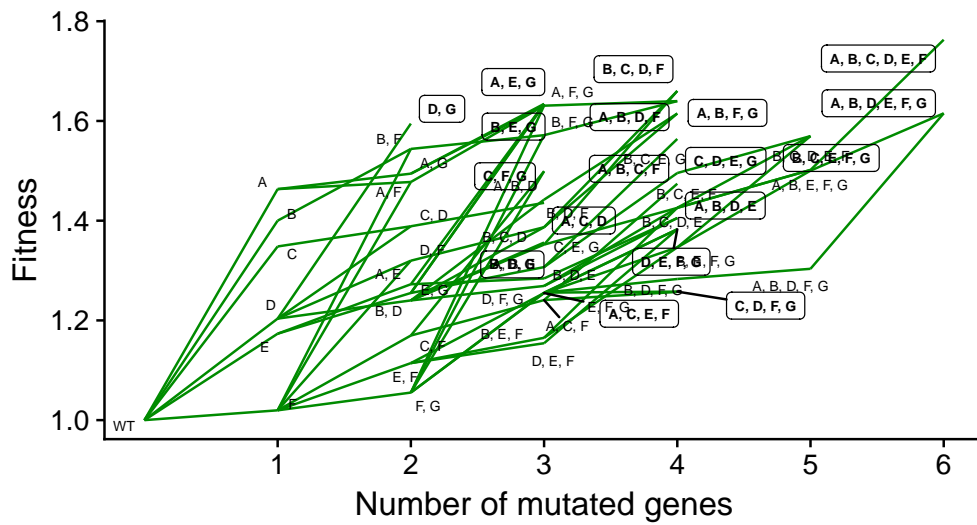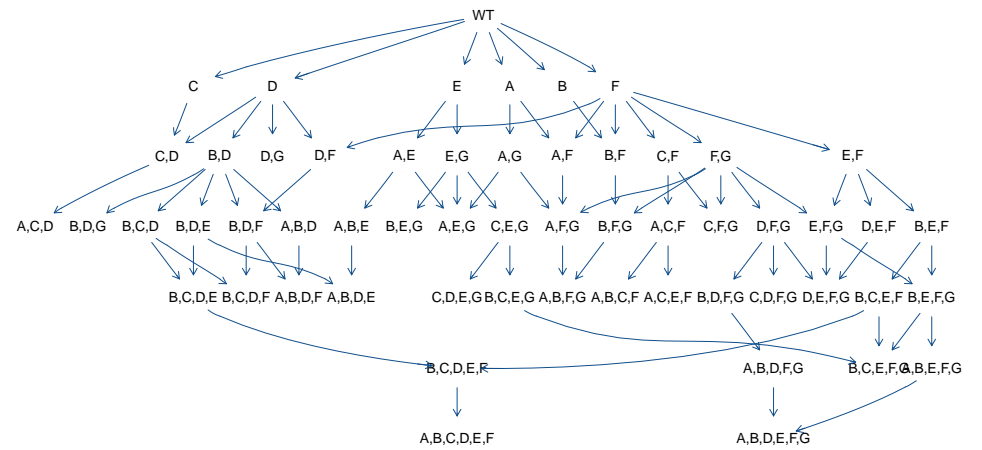

ID BTJyOApuNPFWEPSU  
 acc genotypes 17  
 peaks no back 11  
 removed edges NA  
 prop rem edges NA

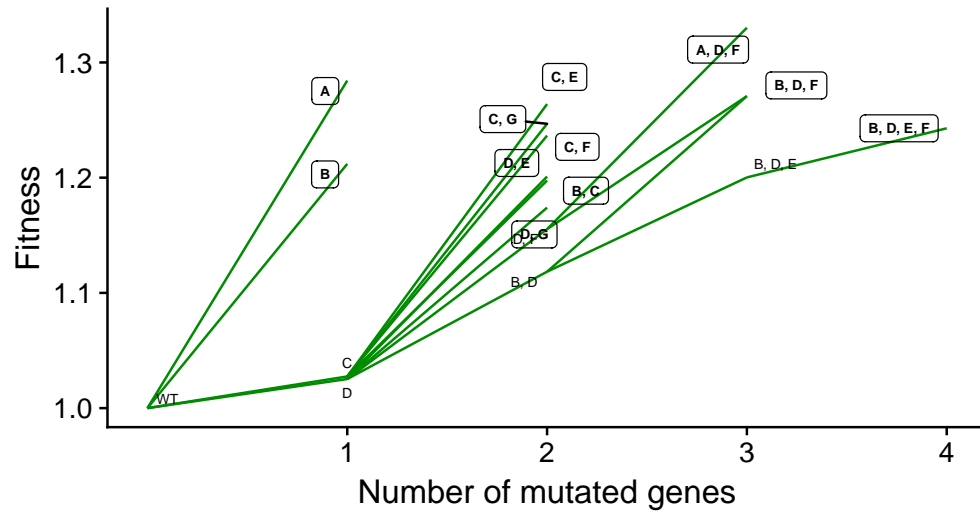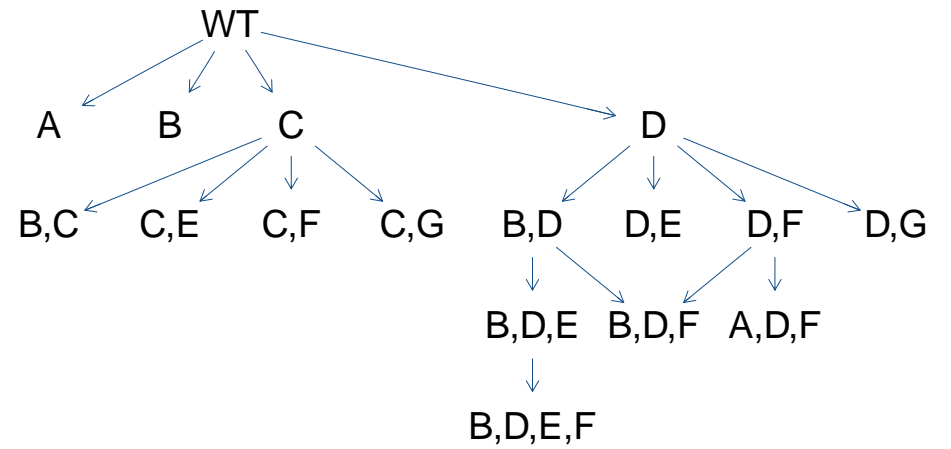

ID BxBVJz10wDpOmersD  
 acc genotypes 90  
 peaks no back 21  
 removed edges NA  
 prop rem edges NA

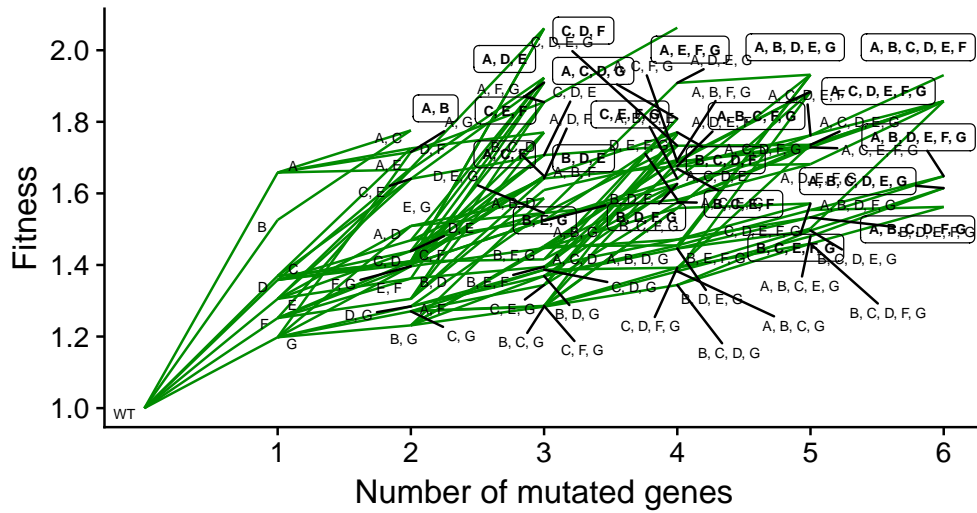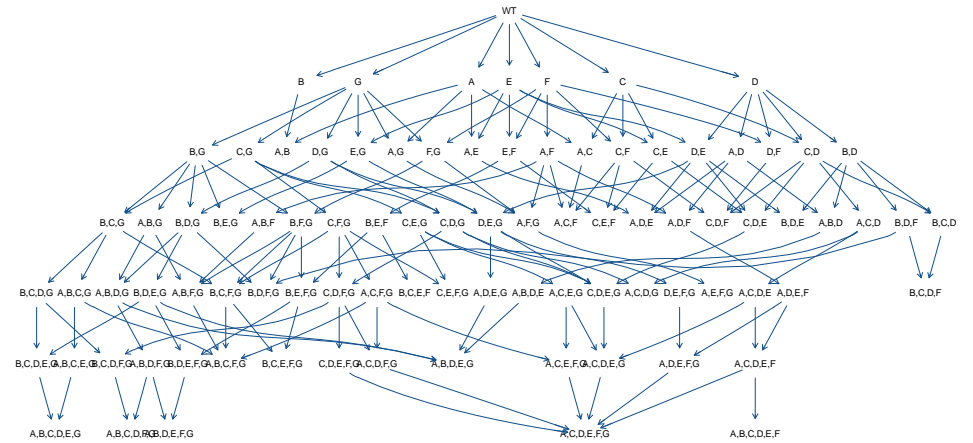

|                       |                  |
|-----------------------|------------------|
| <i>ID</i>             | c42Quu4ADM6baevo |
| <i>acc genotypes</i>  | 60               |
| <i>peaks no back</i>  | 14               |
| <i>removed edges</i>  | NA               |
| <i>prop rem edges</i> | NA               |

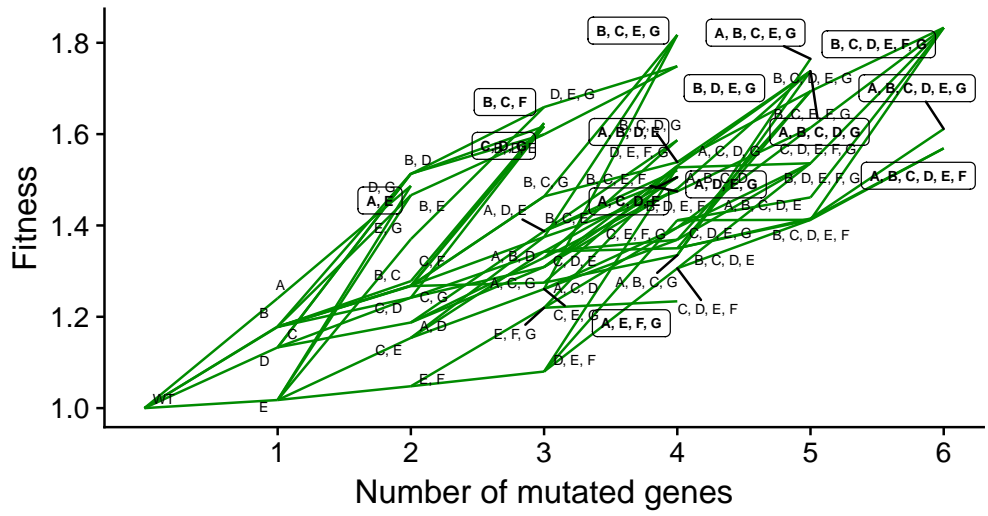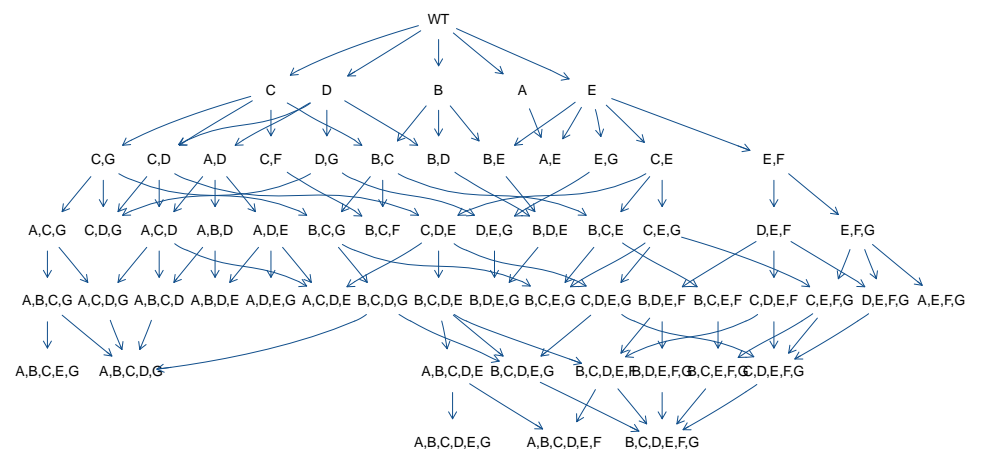

ID c534FhXAH8kOwR3J  
 acc genotypes 53  
 peaks no back 24  
 removed edges NA  
 prop rem edges NA

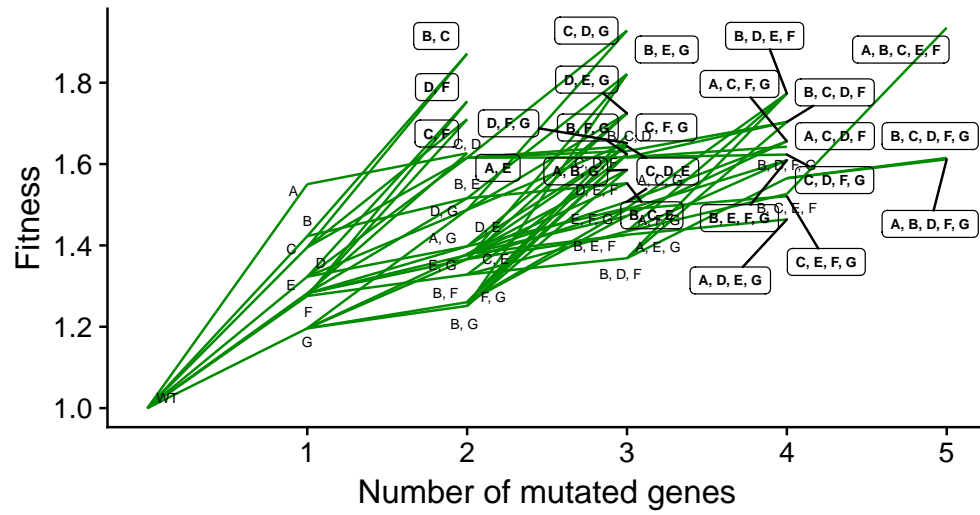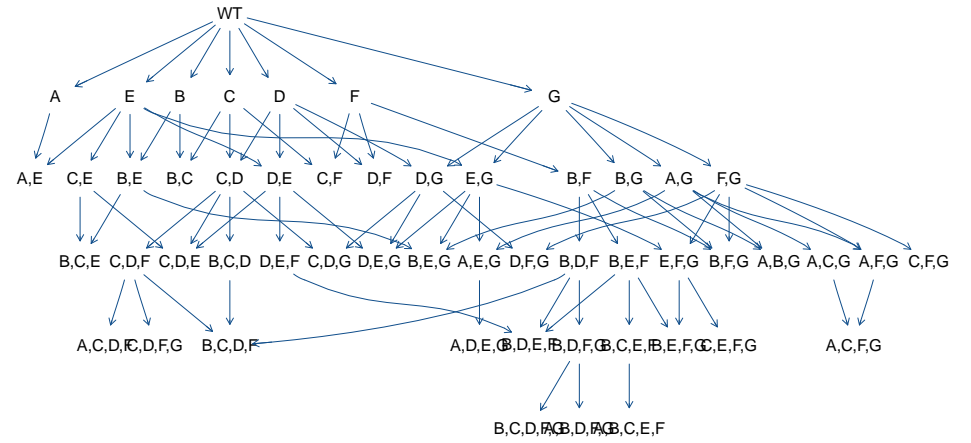

ID [CfrC3ZAnJWi3s9E3](#)  
 acc genotypes 38  
 peaks no back 15  
 removed edges NA  
 prop rem edges NA

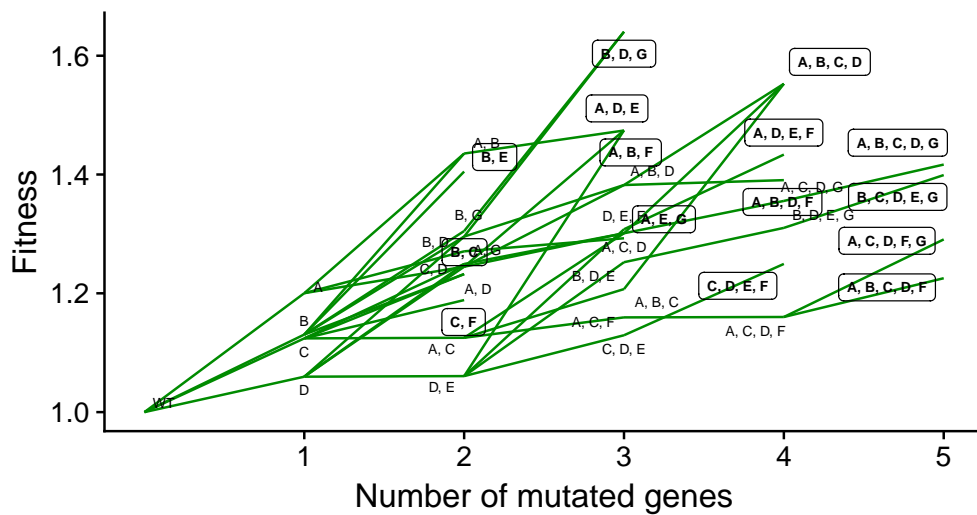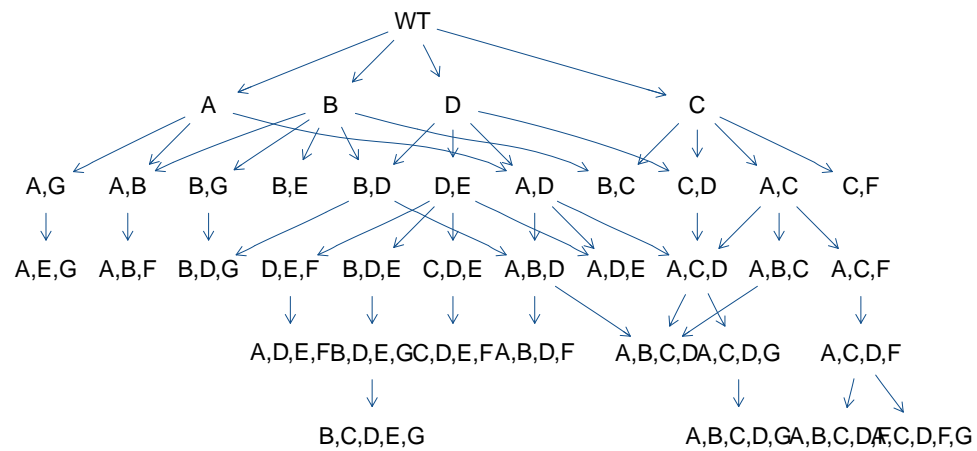

ID CHYQvcfXo103swhhd  
 acc genotypes 26  
 peaks no back 9  
 removed edges NA  
 prop rem edges NA

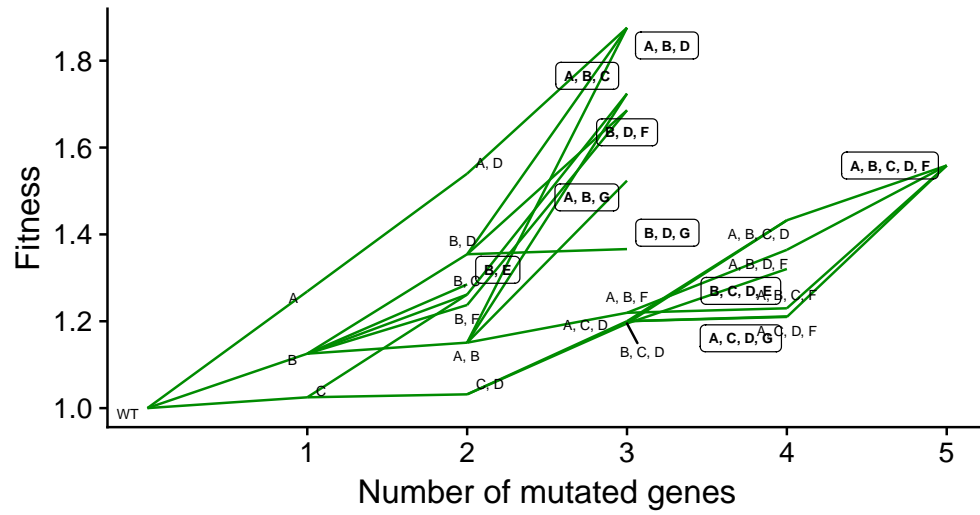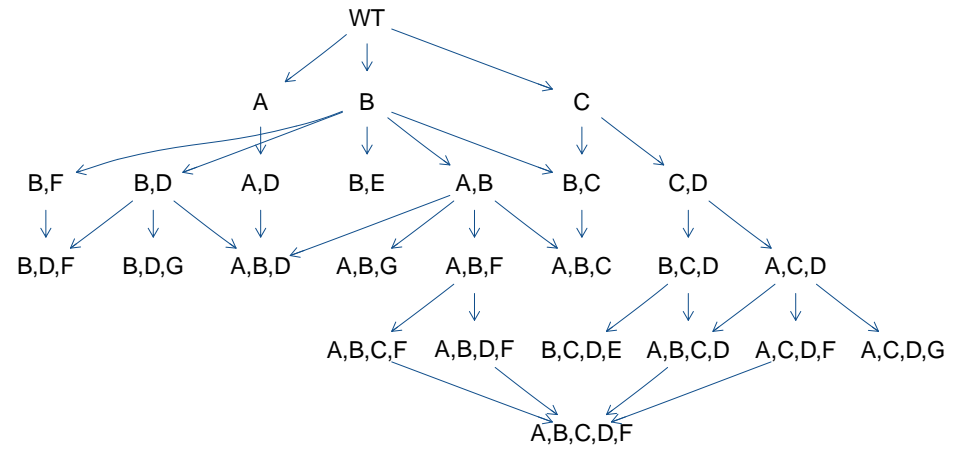



ID [cl8oWQEqqPY7cX2o](#)  
 acc genotypes 22  
 peaks no back 13  
 removed edges NA  
 prop rem edges NA

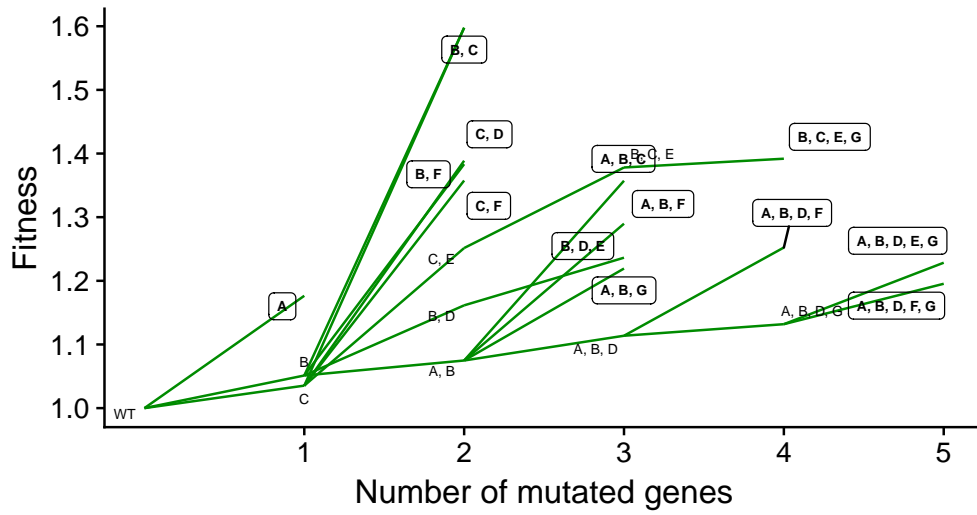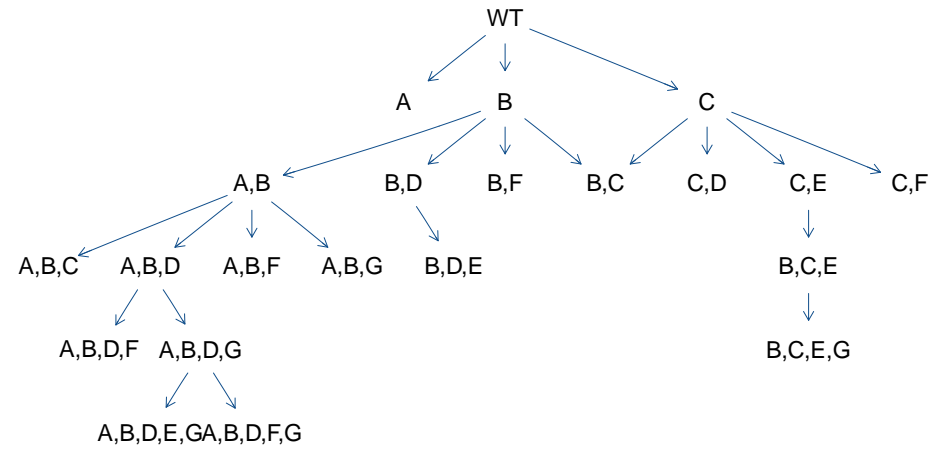

ID CjzXJbJTcI5BNmE1  
 acc genotypes 74  
 peaks no back 21  
 removed edges NA  
 prop rem edges NA

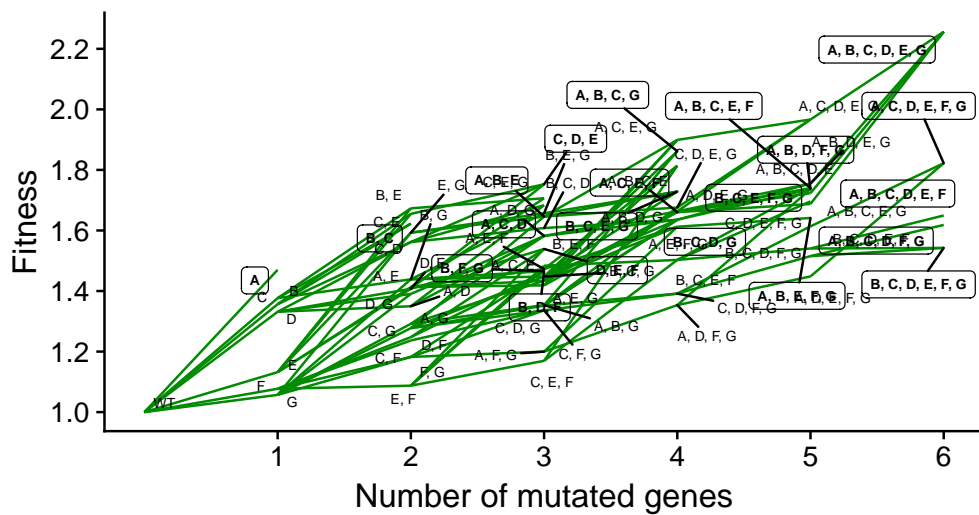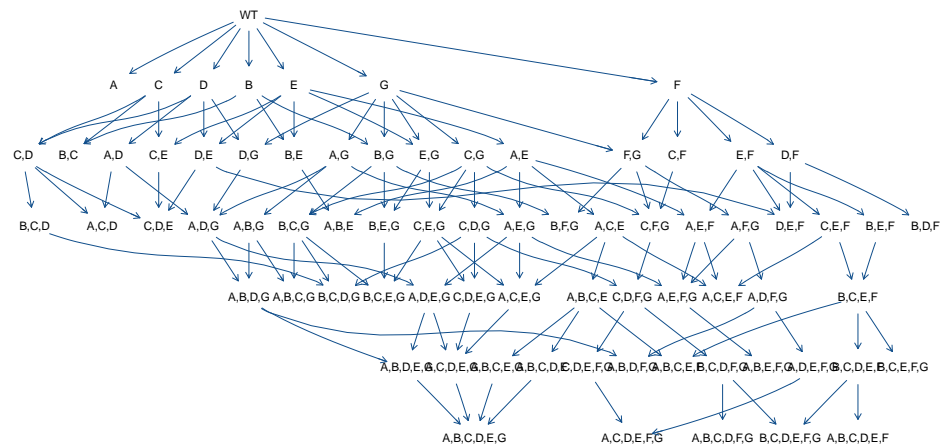

ID Ck1z9wAa7Dm9QHw  
 acc genotypes 24  
 peaks no back 9  
 removed edges NA  
 prop rem edges NA

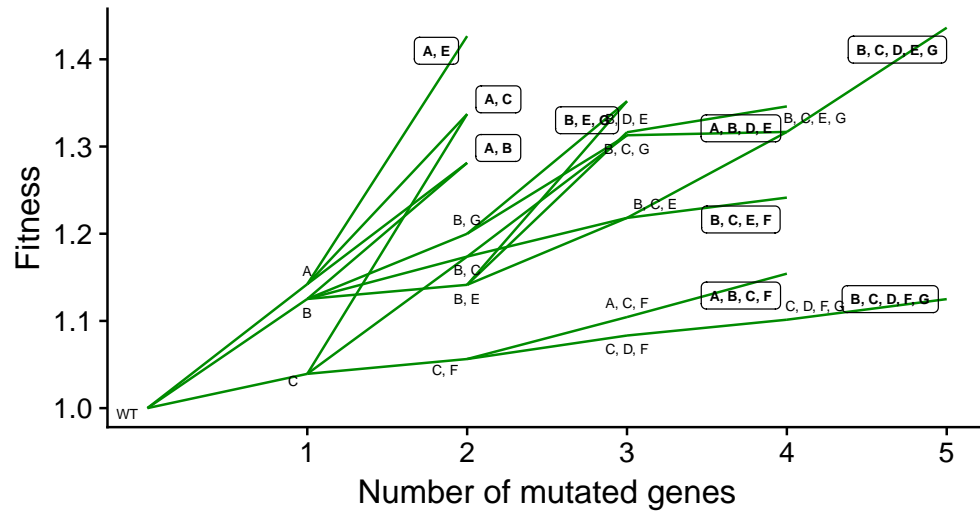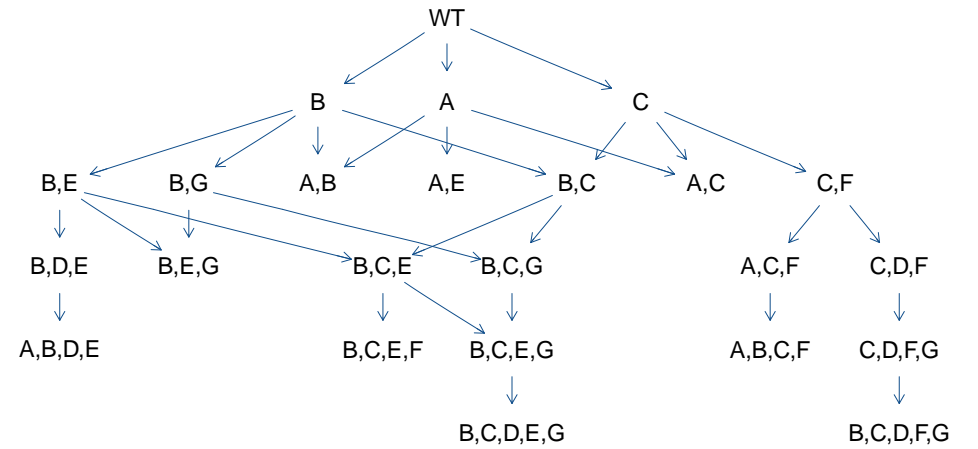

ID CsQcK5oitWE3VWiq  
 acc genotypes 90  
 peaks no back 25  
 removed edges NA  
 prop rem edges NA

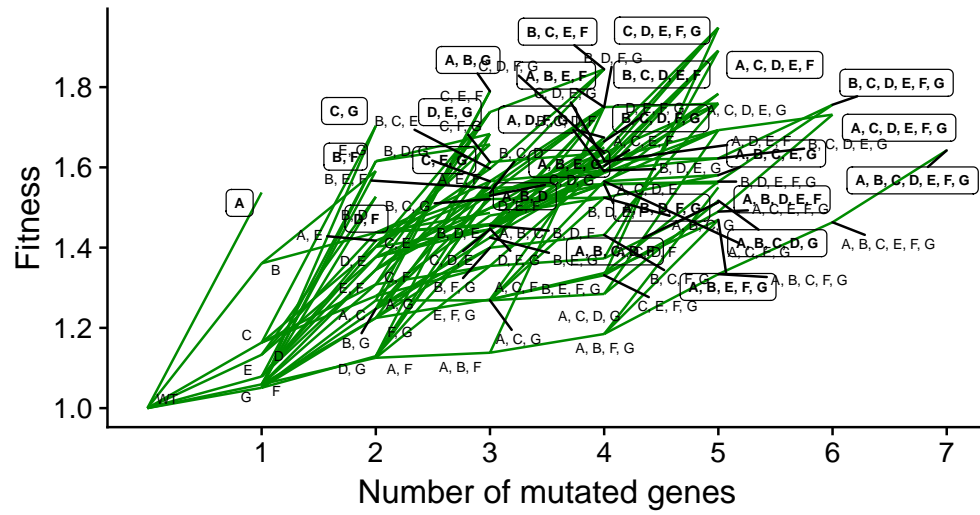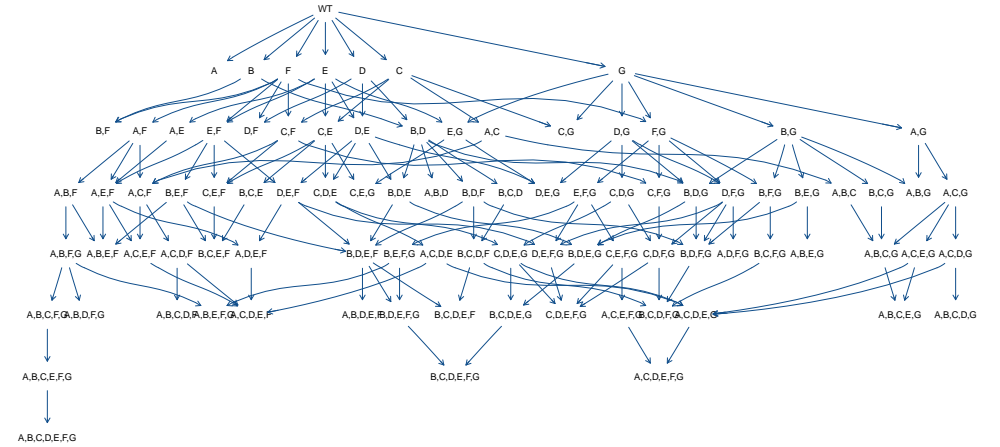



ID CvnM3L5EYGnoEGpc  
 acc genotypes 44  
 peaks no back 19  
 removed edges NA  
 prop rem edges NA

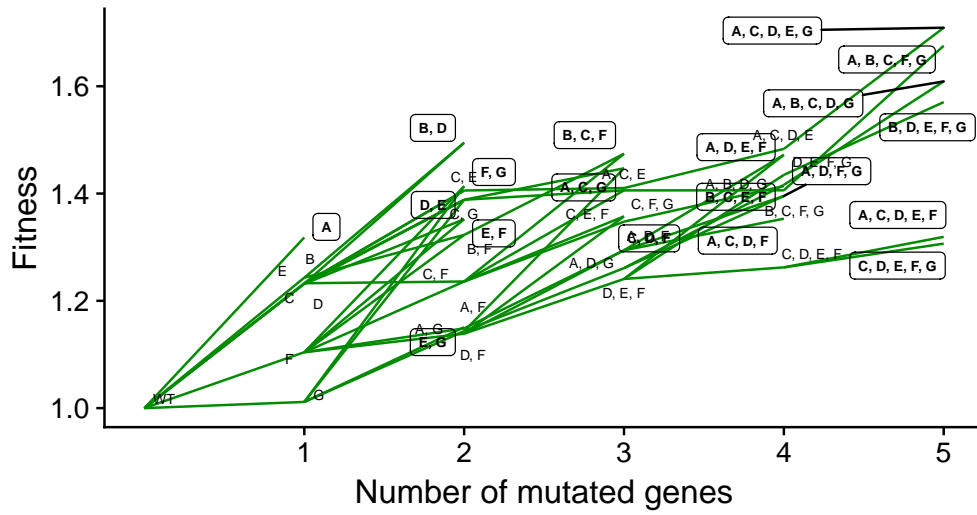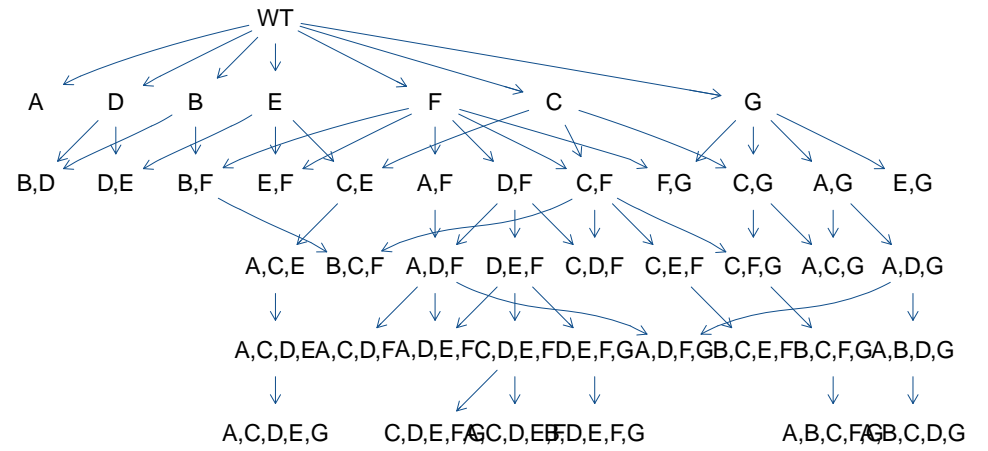

ID **D8vky9fRuaEmBWIV**  
 acc genotypes **45**  
 peaks no back **16**  
 removed edges **NA**  
 prop rem edges **NA**

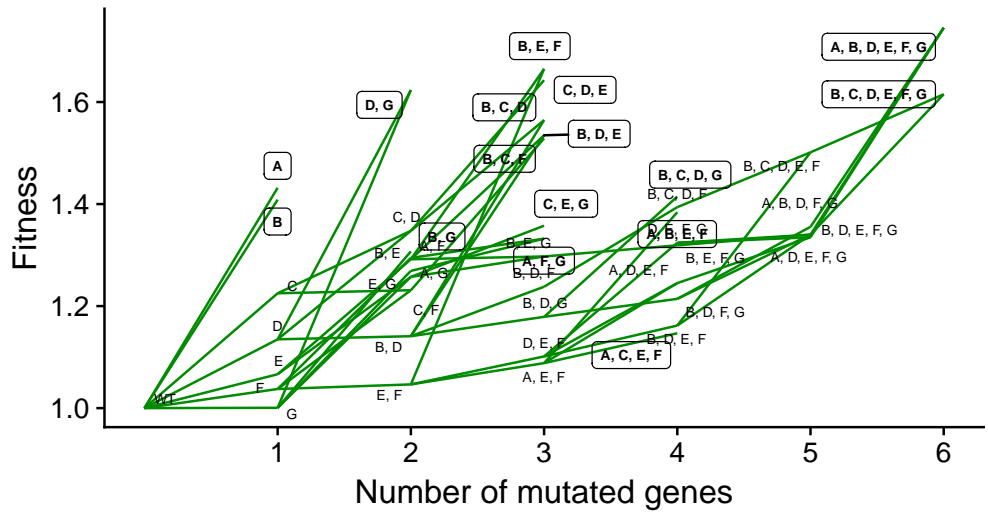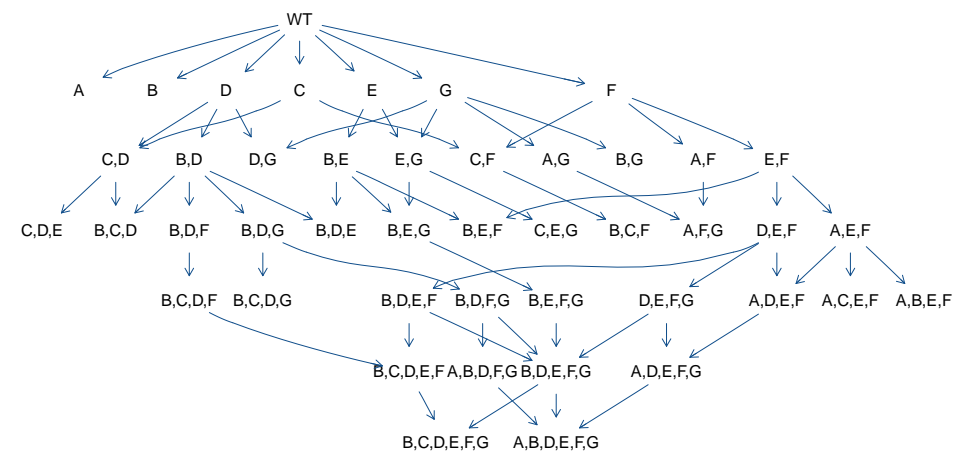

ID Daq9vjlG10xrsjP23  
 acc genotypes 22  
 peaks no back 13  
 removed edges NA  
 prop rem edges NA

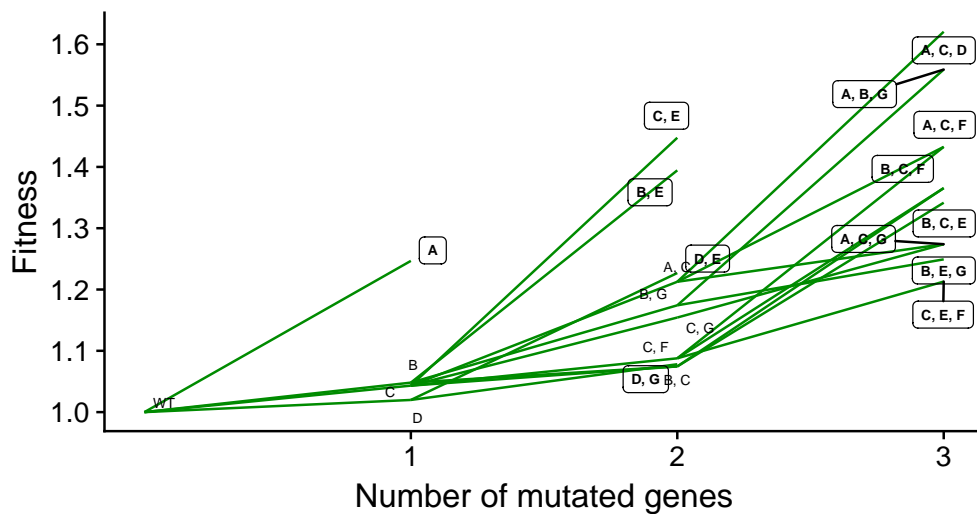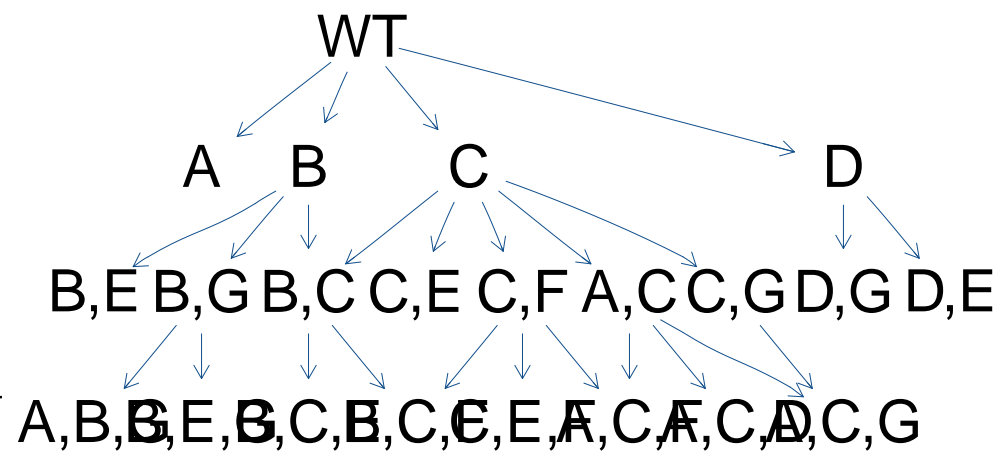



ID deoj10TADCLDL0A5o  
 acc genotypes 30  
 peaks no back 8  
 removed edges NA  
 prop rem edges NA

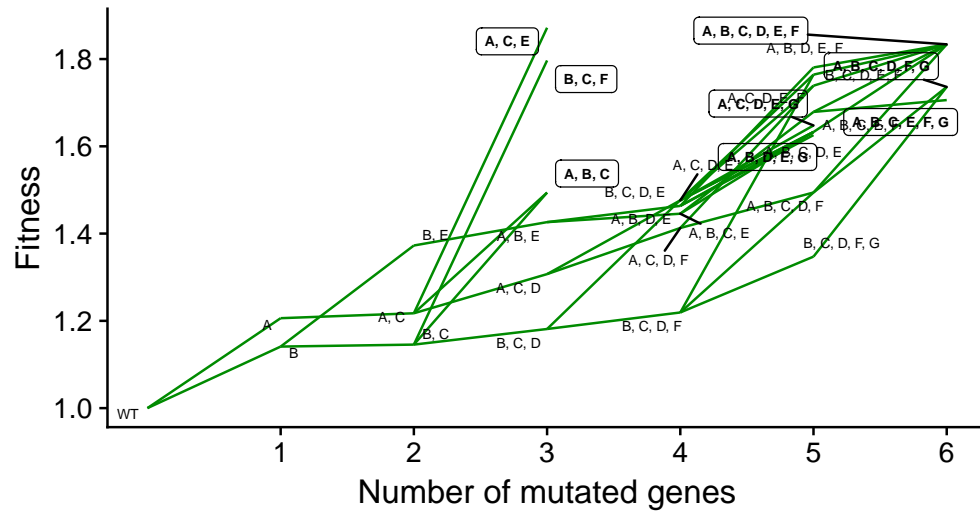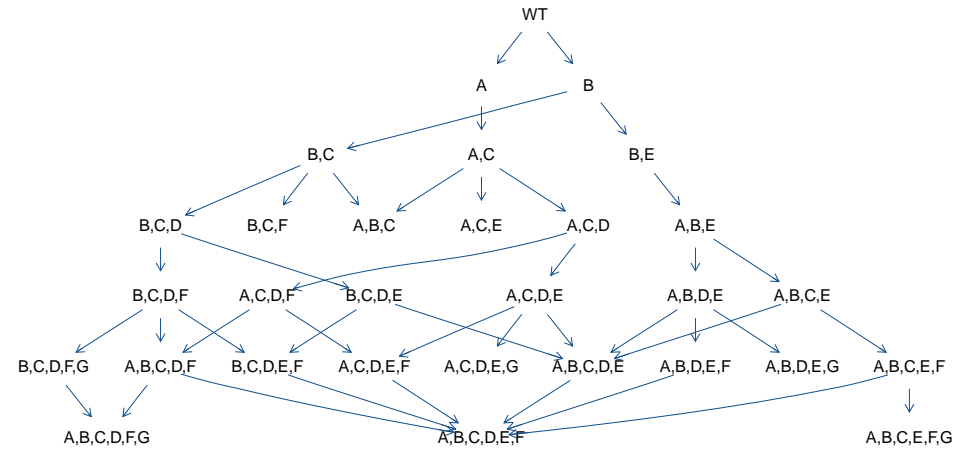

ID dTwzjRHQb3XHk1Qo  
 acc genotypes 39  
 peaks no back 14  
 removed edges NA  
 prop rem edges NA

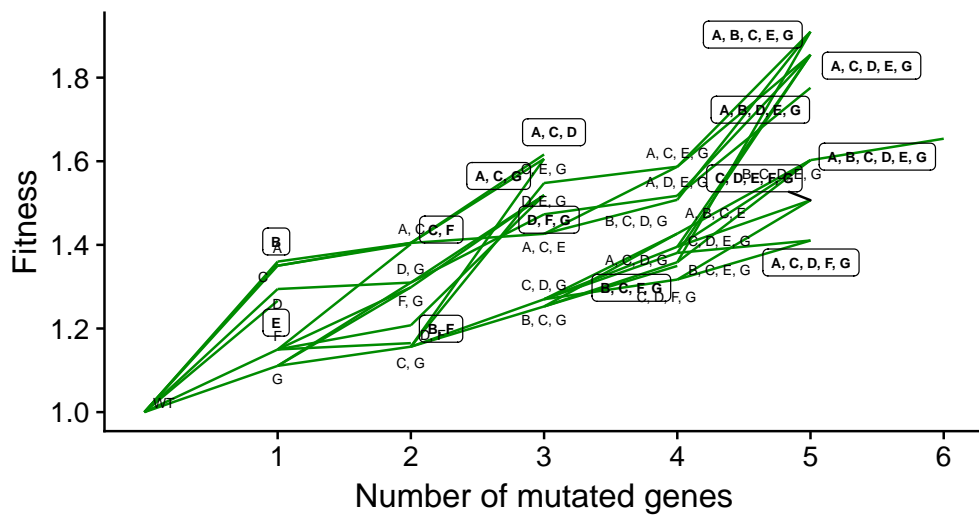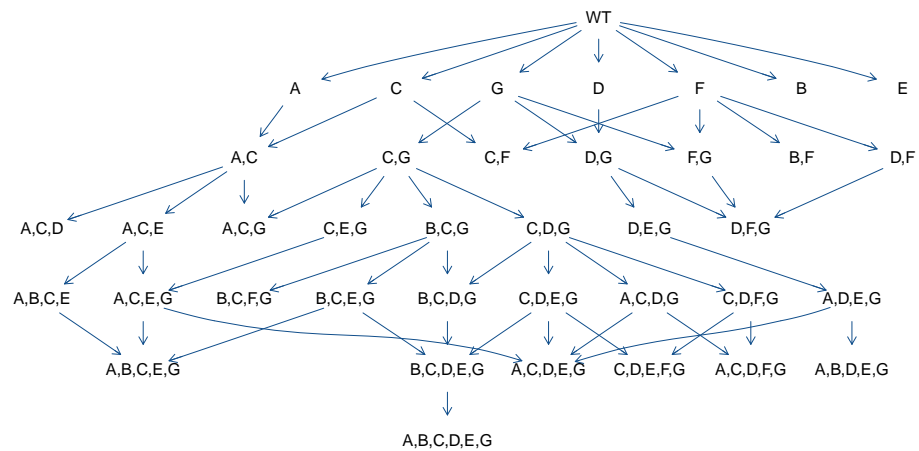

ID duoNzOQwAe8B75y5  
 acc genotypes 42  
 peaks no back 8  
 removed edges NA  
 prop rem edges NA

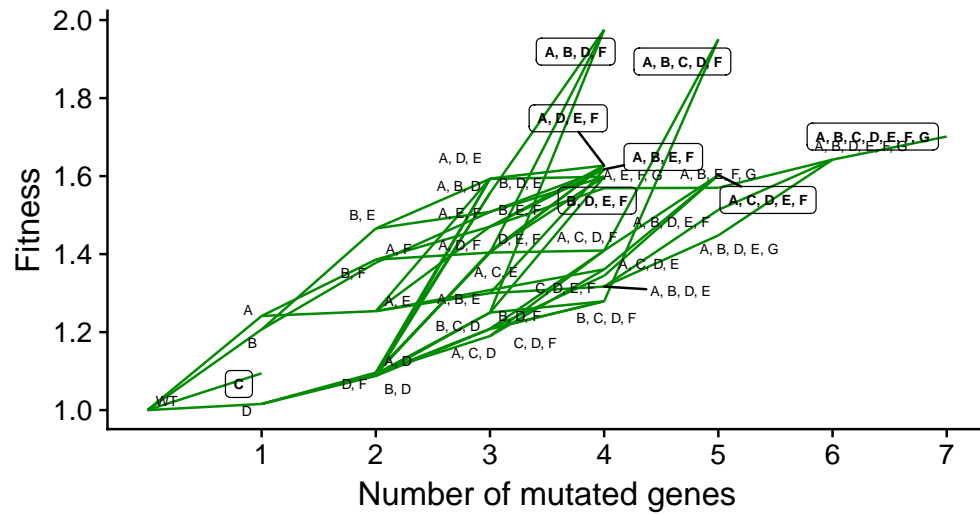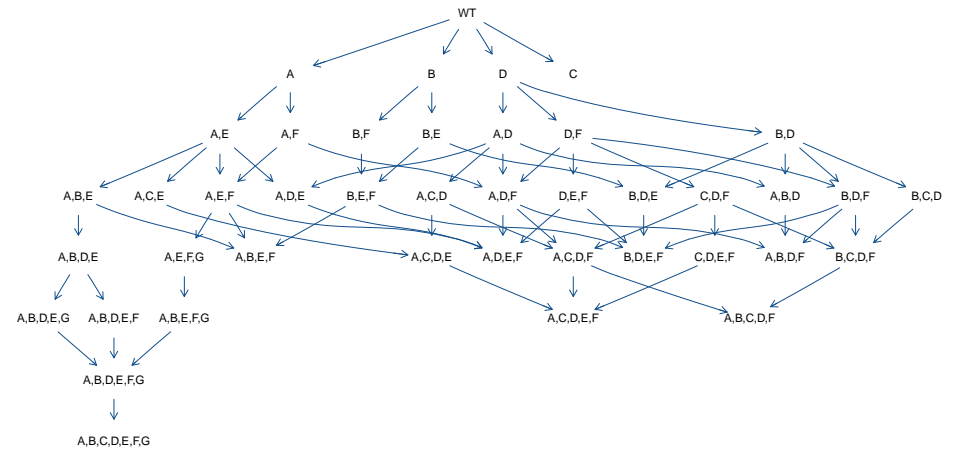

ID [Dv4AjSOSStEZrnaox](#)  
 acc genotypes 62  
 peaks no back 17  
 removed edges NA  
 prop rem edges NA

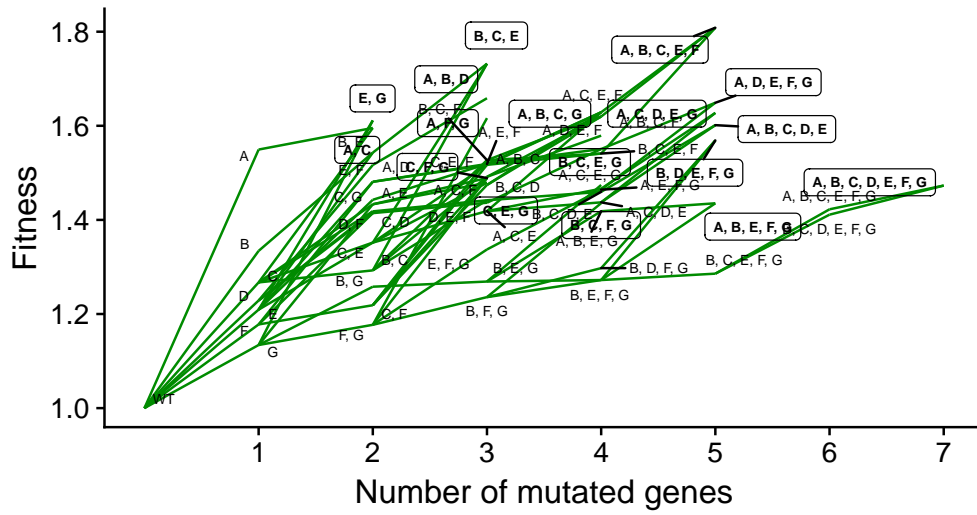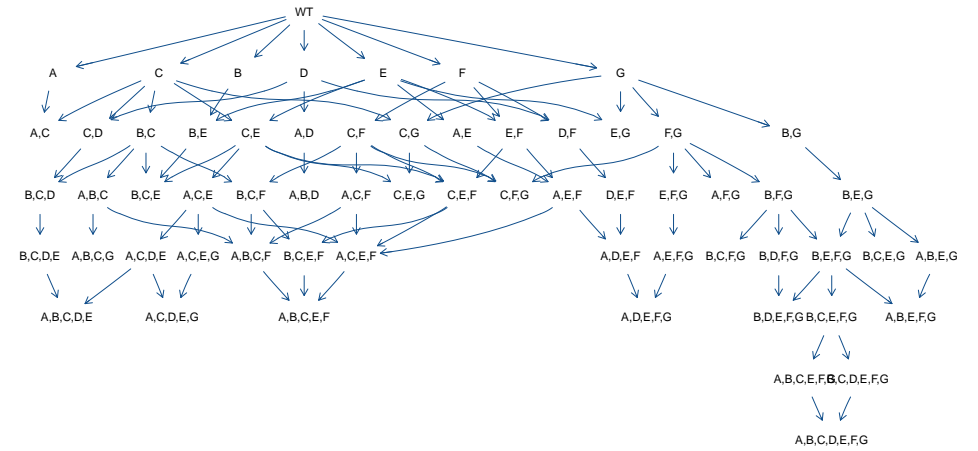

ID E1088yM4b7OyoaM3C  
 acc genotypes 96  
 peaks no back 12  
 removed edges NA  
 prop rem edges NA

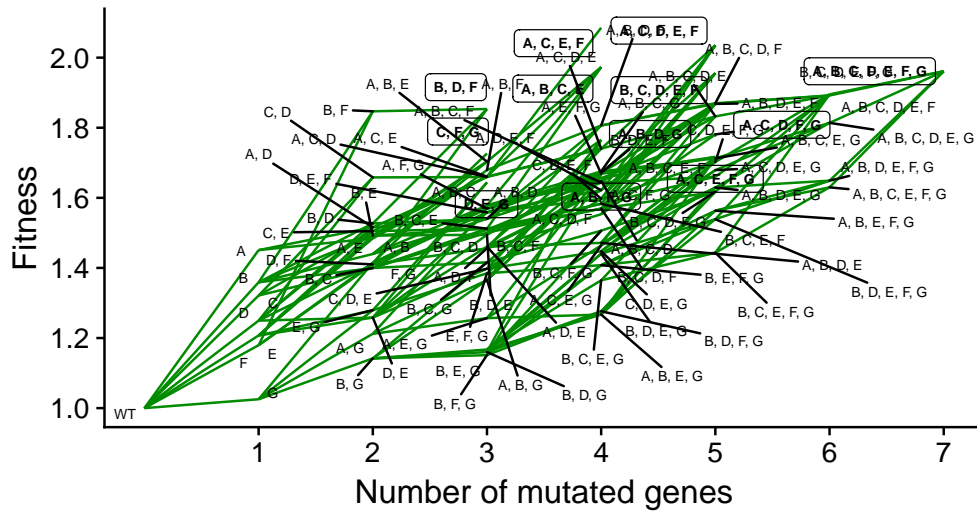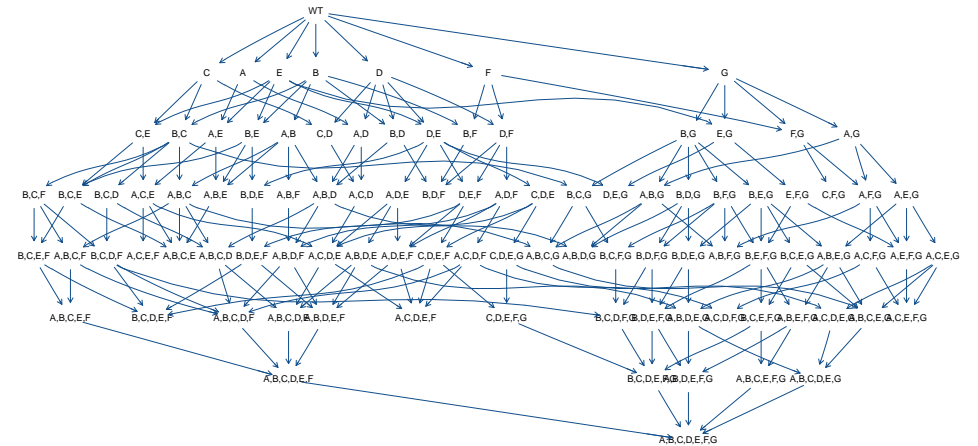

ID EAI9G10BQGPjOaTd  
 acc genotypes 20  
 peaks no back 9  
 removed edges NA  
 prop rem edges NA

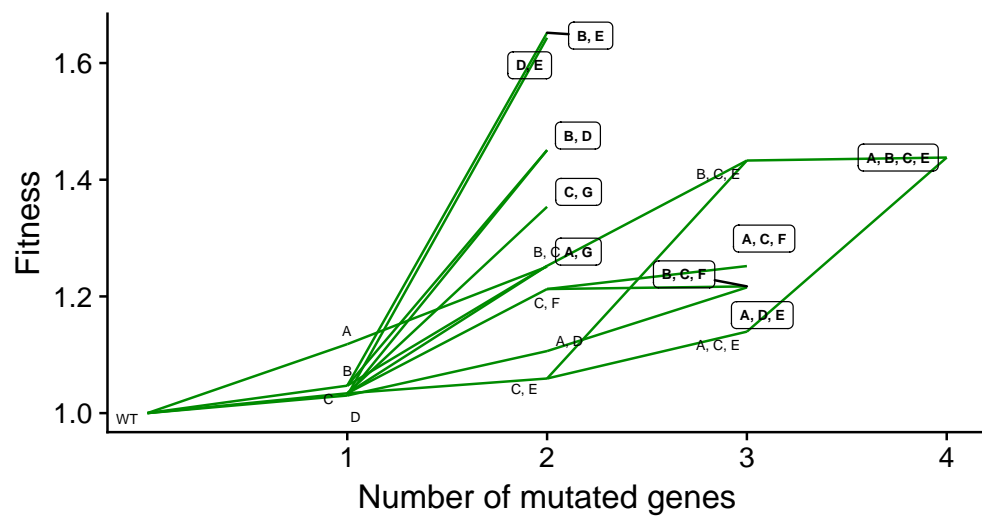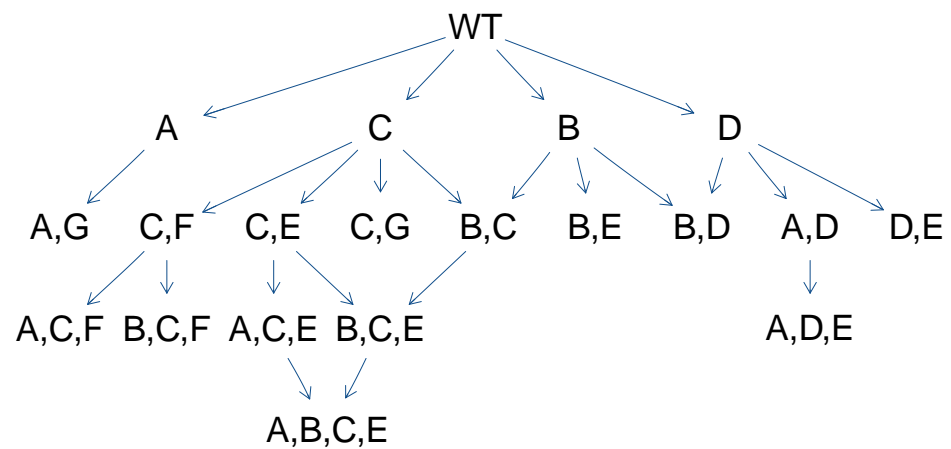

ID [eb4moeiVT2ClnVLV](#)  
 acc genotypes 74  
 peaks no back 28  
 removed edges NA  
 prop rem edges NA

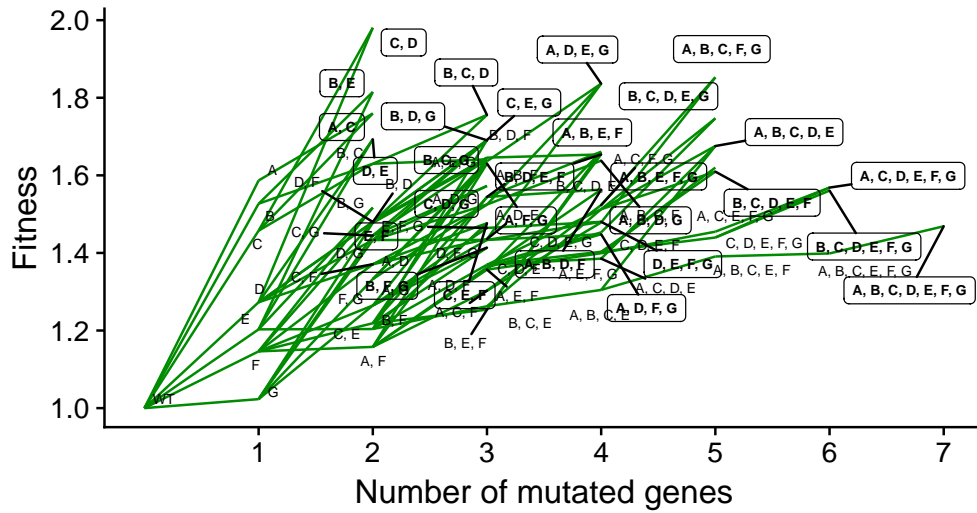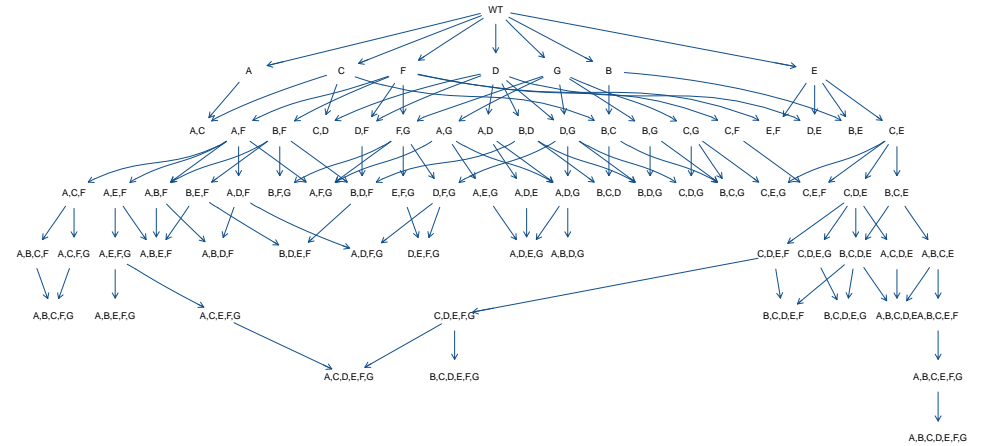

ID [EdoyPIJWzx CpBrys](#)  
 acc genotypes 31  
 peaks no back 14  
 removed edges NA  
 prop rem edges NA

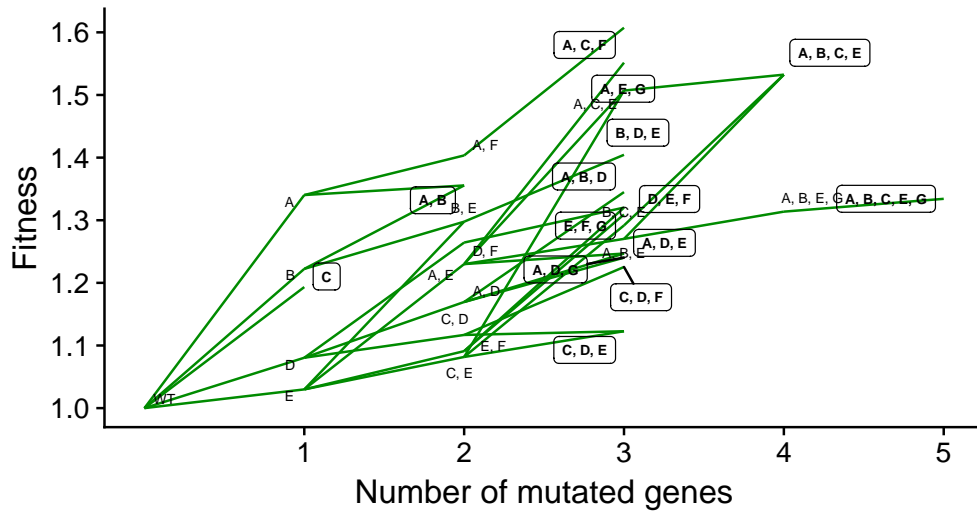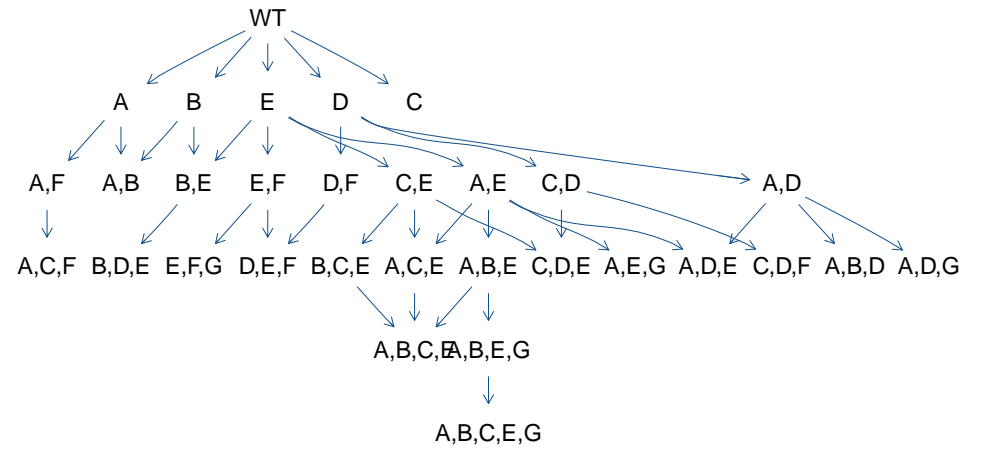



ID EKkcYkyuQzPjnUDy  
 acc genotypes 54  
 peaks no back 16  
 removed edges NA  
 prop rem edges NA

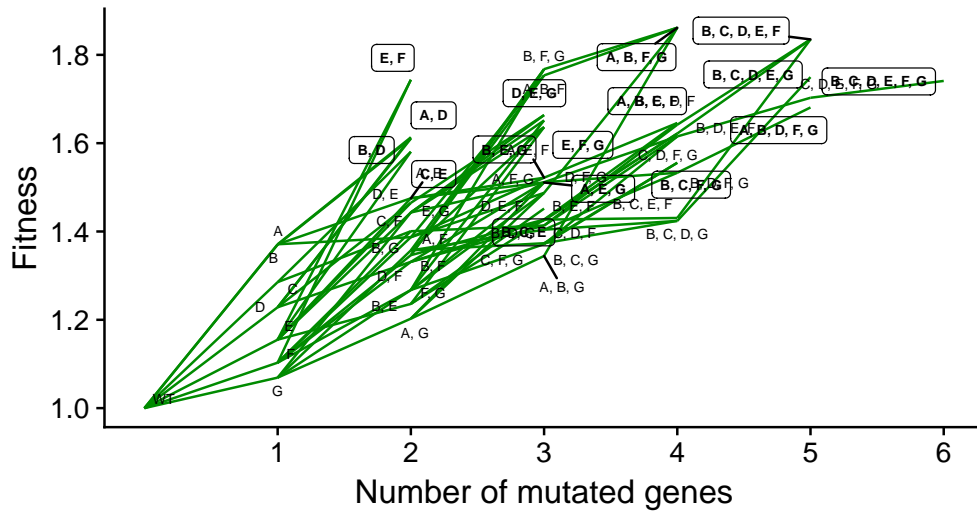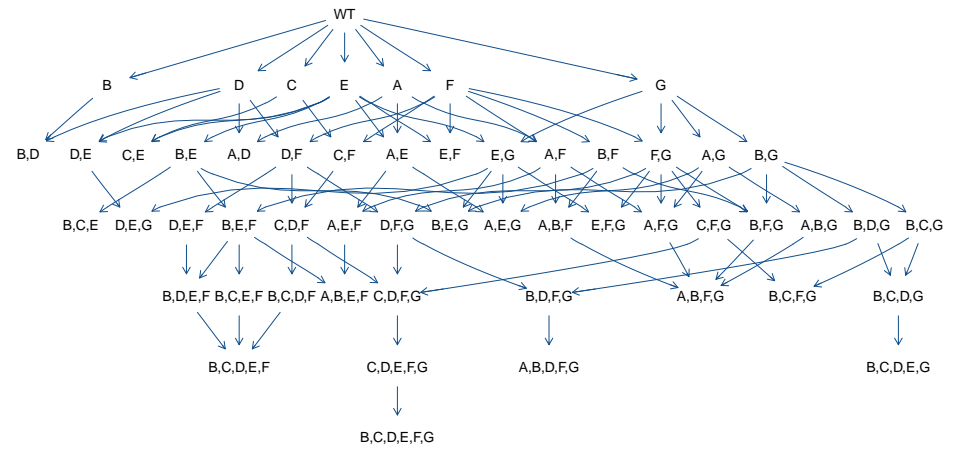

ID EM68B9s53CXWI9KL  
 acc genotypes 41  
 peaks no back 16  
 removed edges NA  
 prop rem edges NA

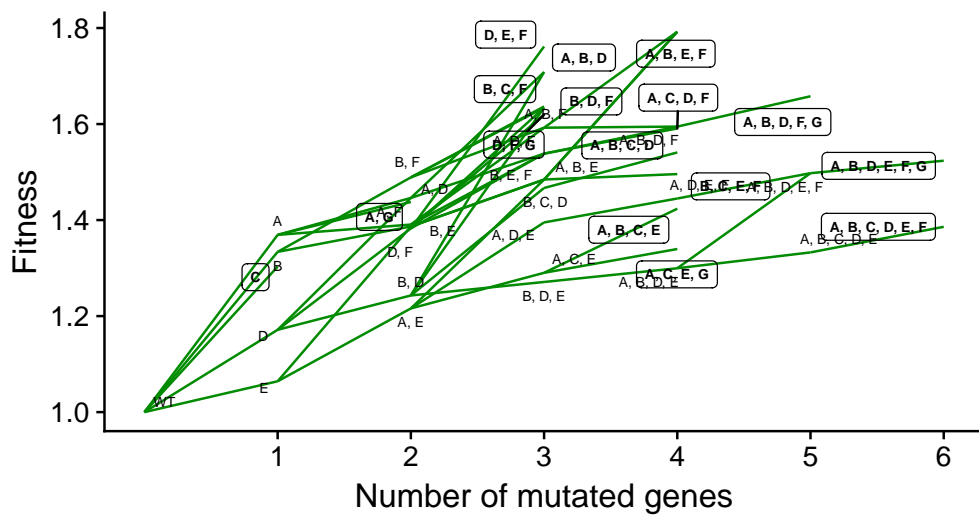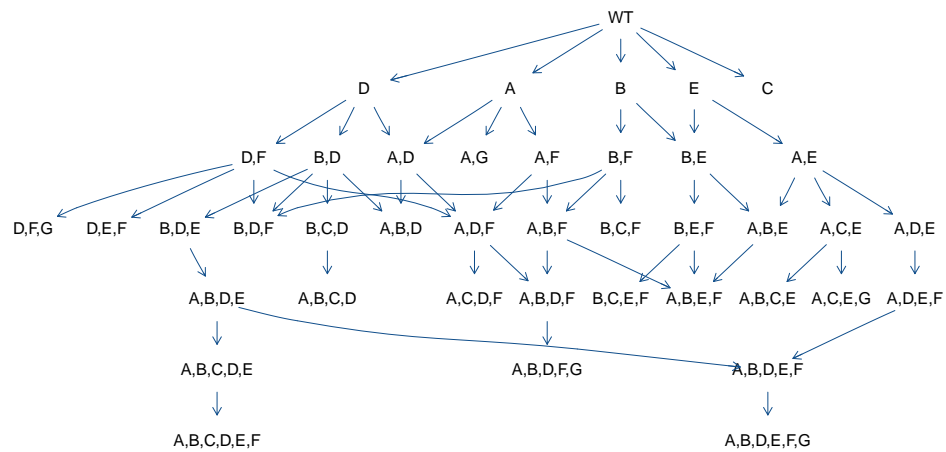

ID eQOmKNmXnLoUPYw5  
 acc genotypes 30  
 peaks no back 14  
 removed edges NA  
 prop rem edges NA

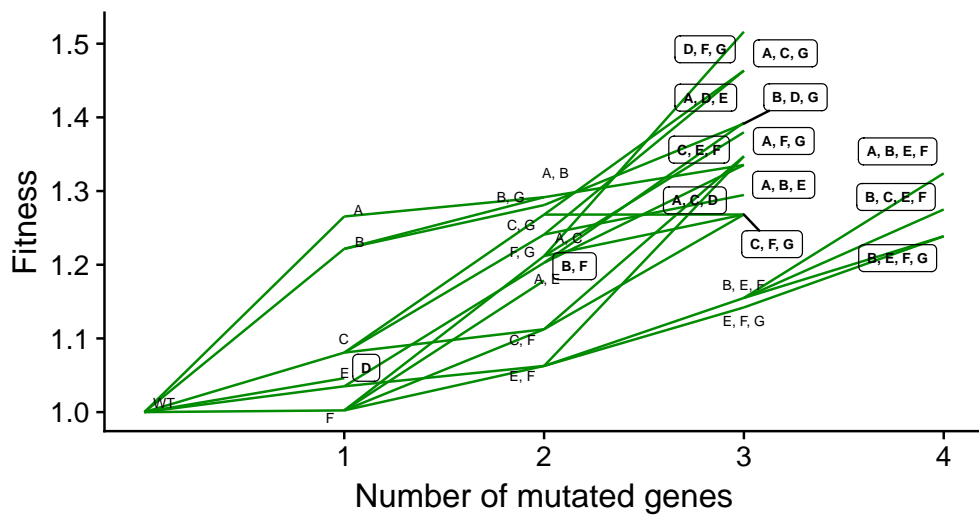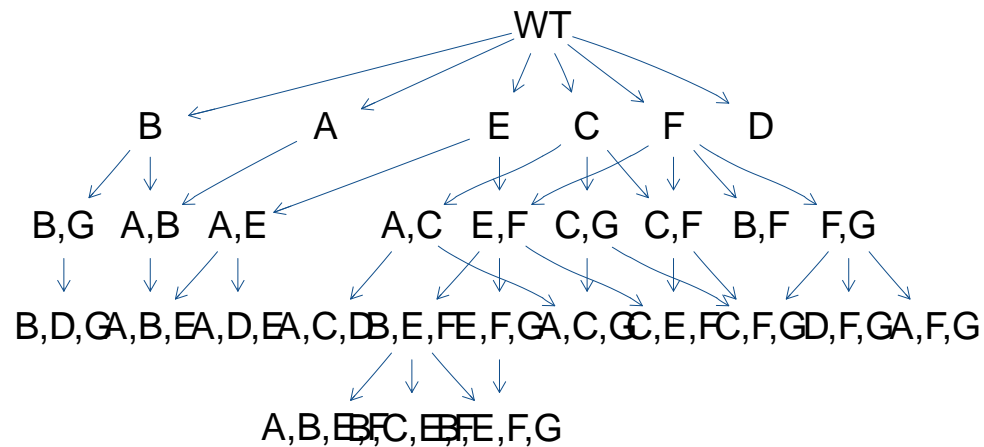

ID EsTjWIE7vDhzVqNd  
 acc genotypes 69  
 peaks no back 20  
 removed edges NA  
 prop rem edges NA

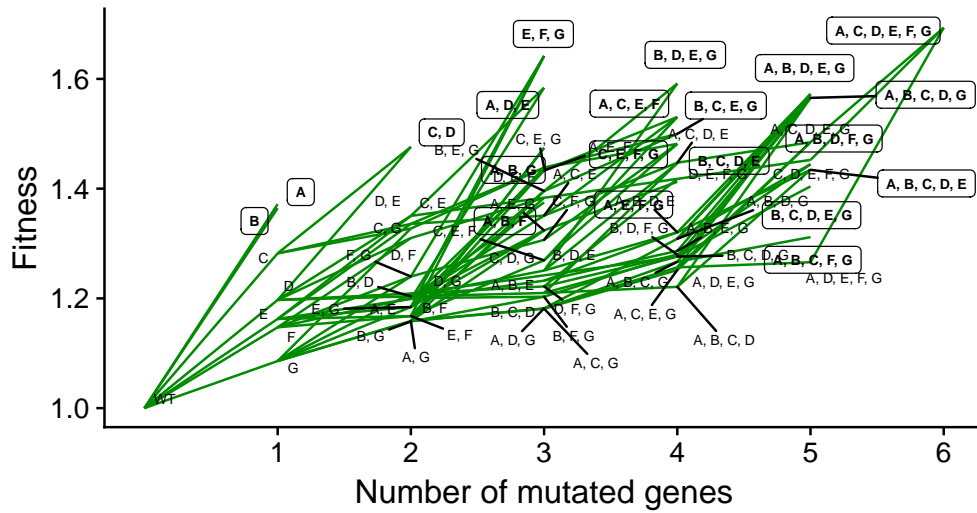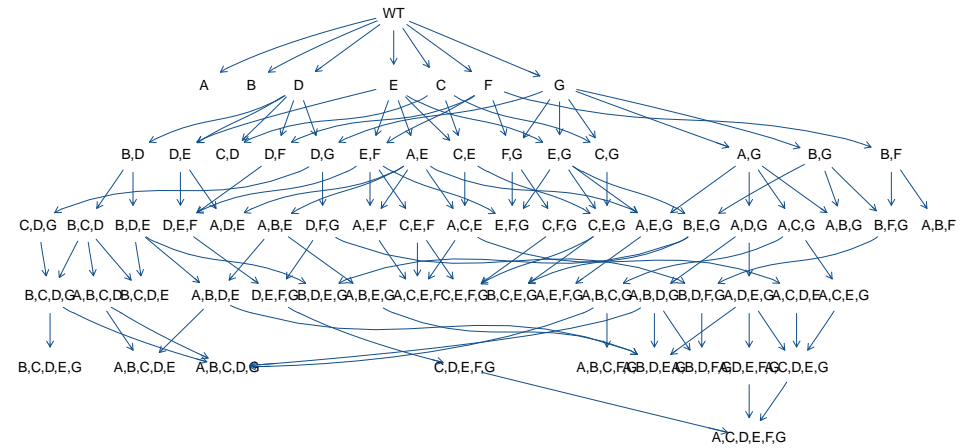

ID ETH7102TvoUx6htCa  
 acc genotypes 21  
 peaks no back 9  
 removed edges NA  
 prop rem edges NA

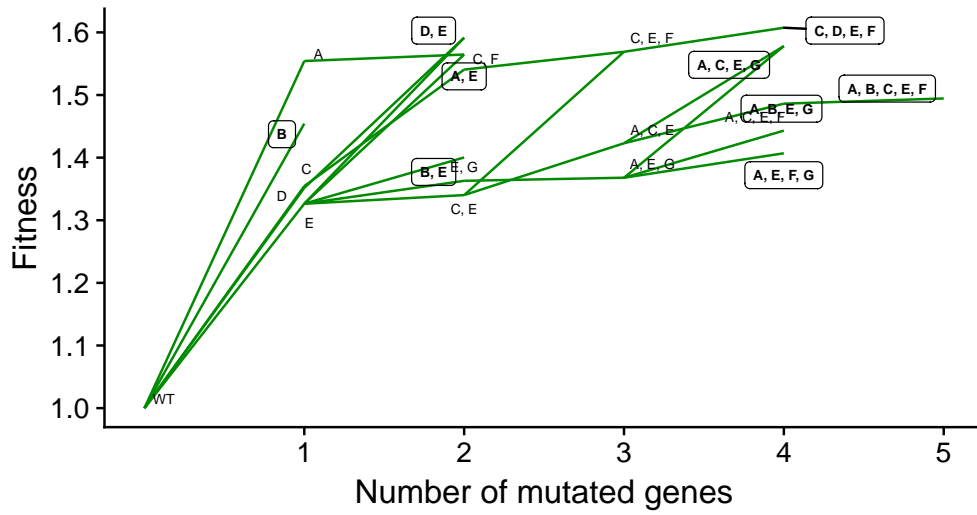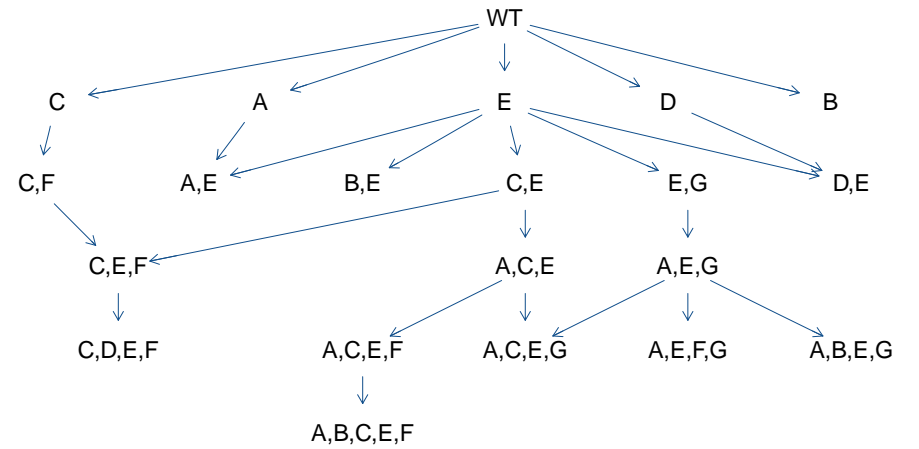

ID eUzrnqLvHVknhTTj  
 acc genotypes 40  
 peaks no back 11  
 removed edges NA  
 prop rem edges NA

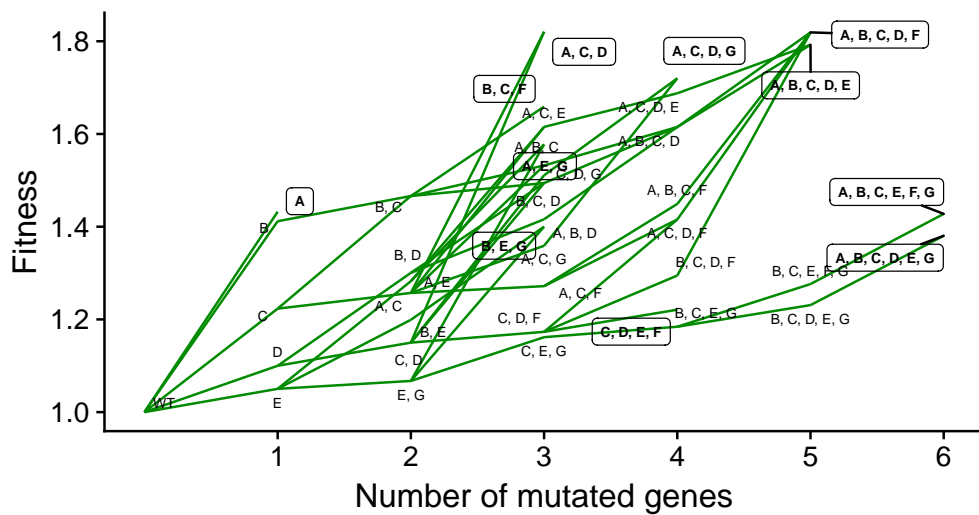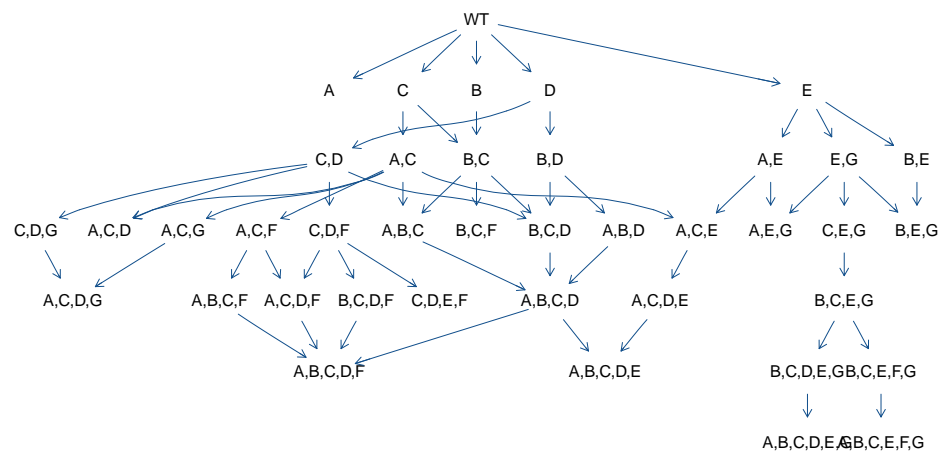

ID fdZVeDILcm54cJxM  
 acc genotypes 41  
 peaks no back 17  
 removed edges NA  
 prop rem edges NA

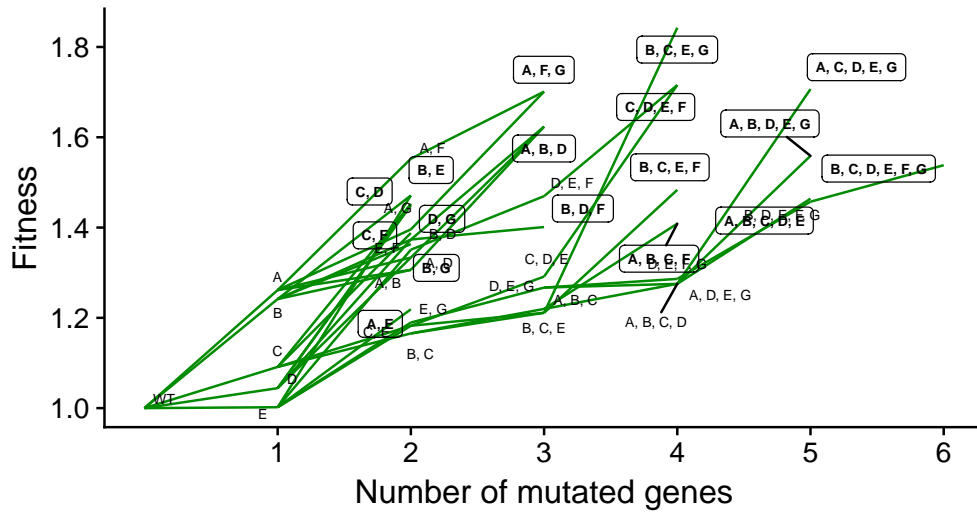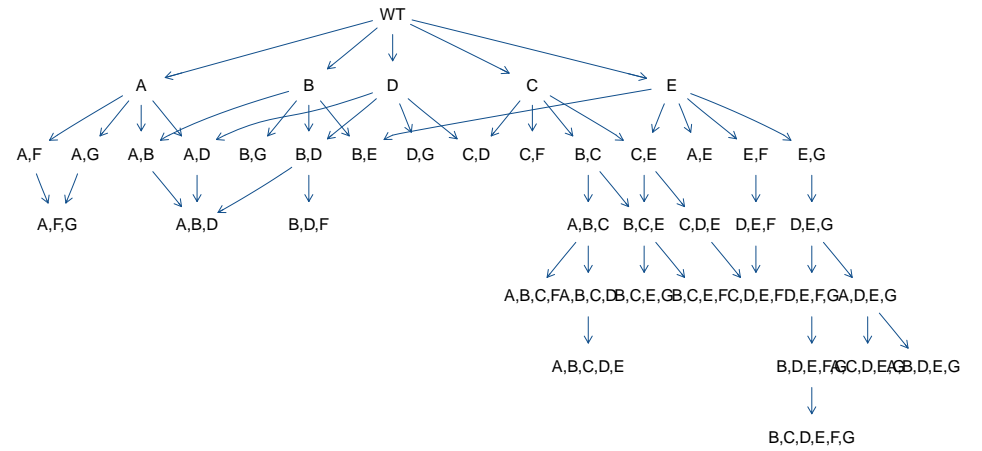

ID **fE3LkSfz106ZntdBy**  
 acc genotypes **48**  
 peaks no back 13  
 removed edges NA  
 prop rem edges NA

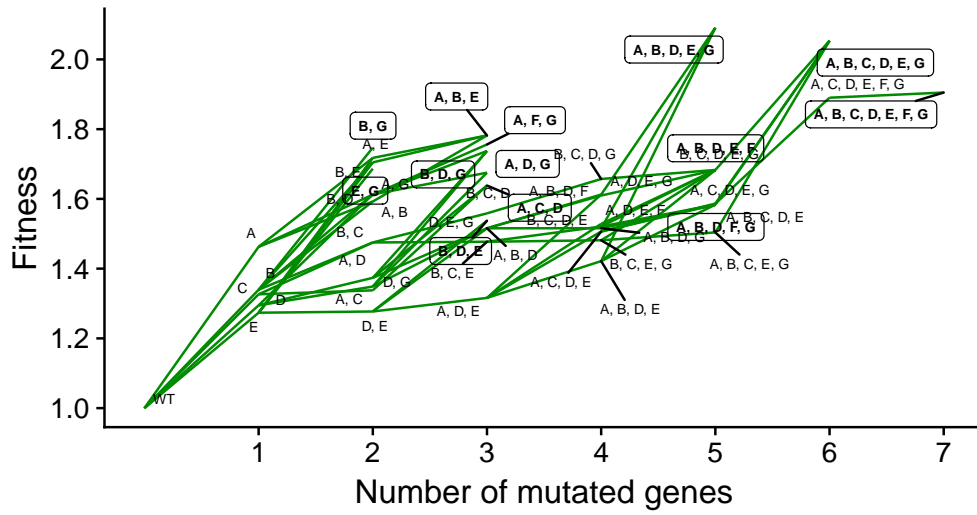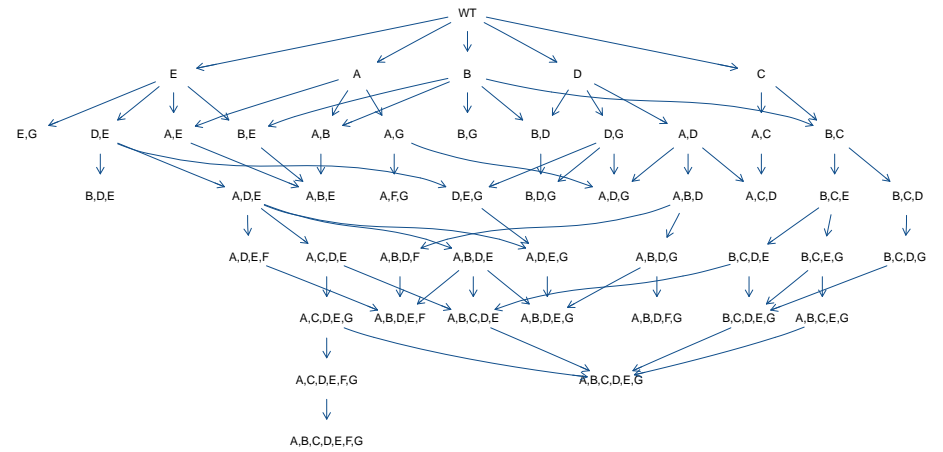



ID fEwT1uohy1ShL5nH  
 acc genotypes 38  
 peaks no back 17  
 removed edges NA  
 prop rem edges NA

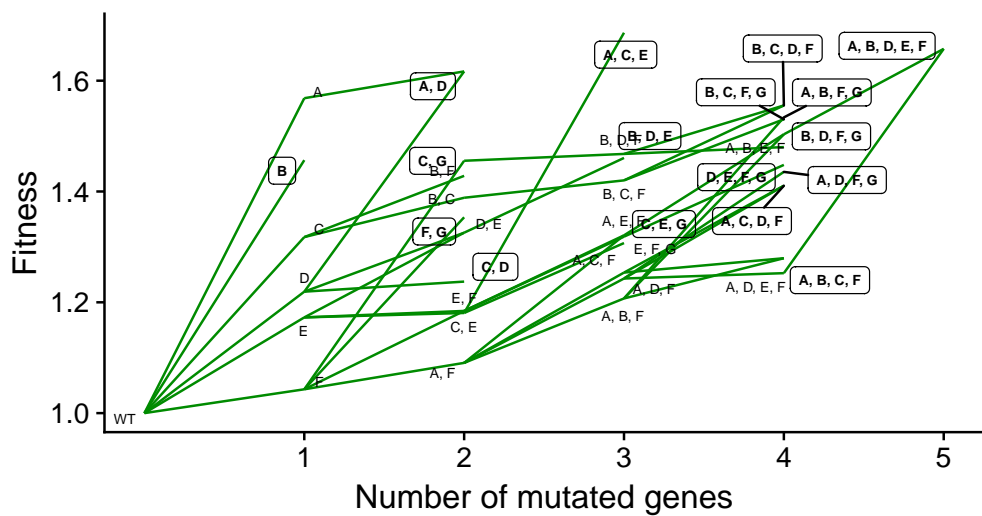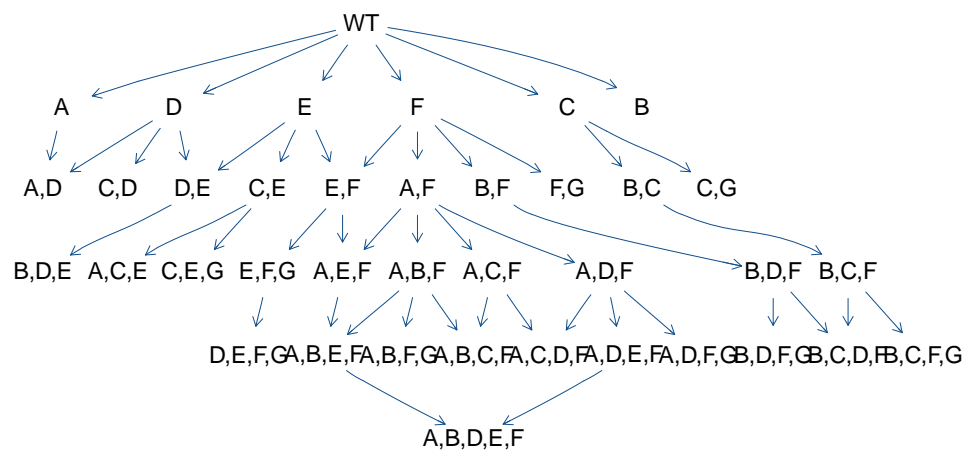

ID **fs10Ju2gMFkEFOANK**  
 acc genotypes **20**  
 peaks no back **8**  
 removed edges **NA**  
 prop rem edges **NA**

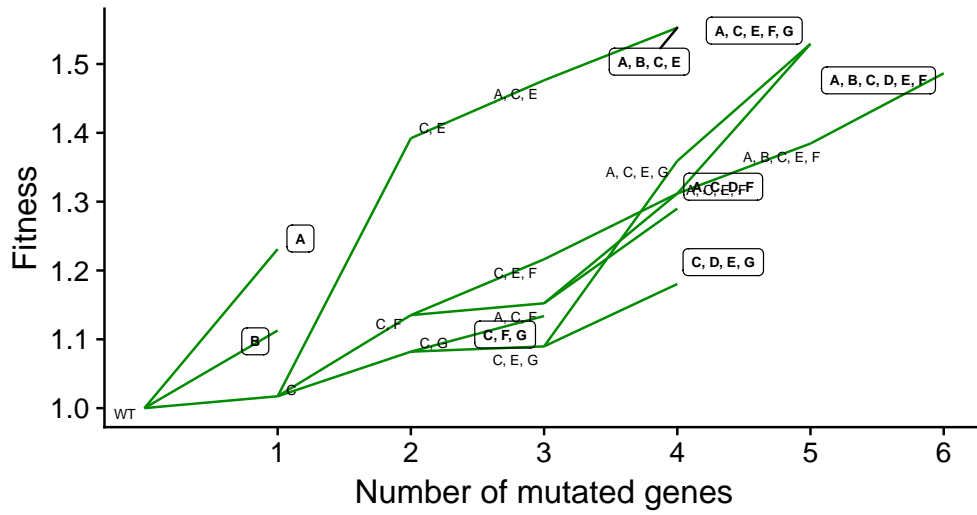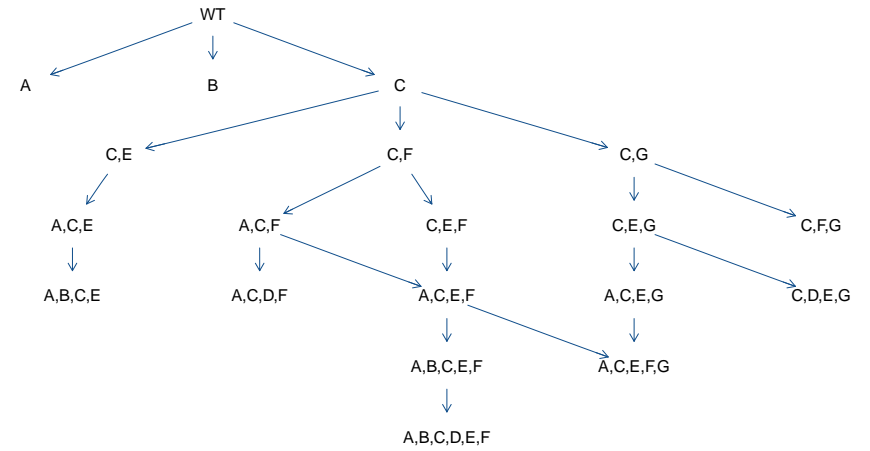

ID Fwg3jWZQftuLFTc8  
 acc genotypes 43  
 peaks no back 13  
 removed edges NA  
 prop rem edges NA

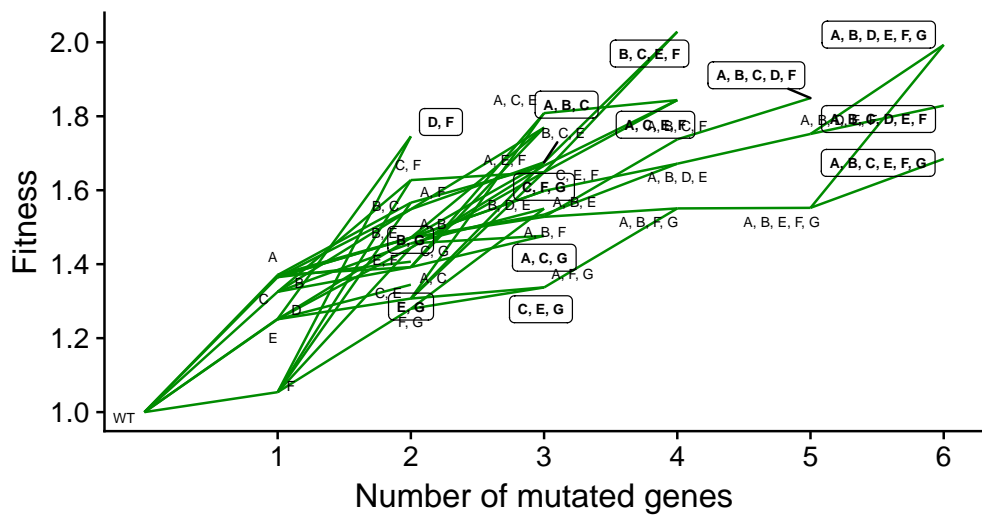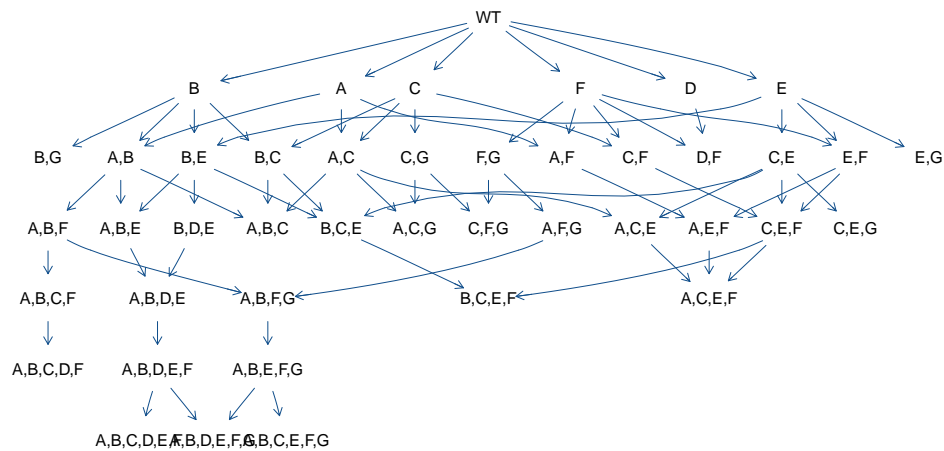

ID fzwb5MOAwOWpF4B9  
 acc genotypes 62  
 peaks no back 18  
 removed edges NA  
 prop rem edges NA

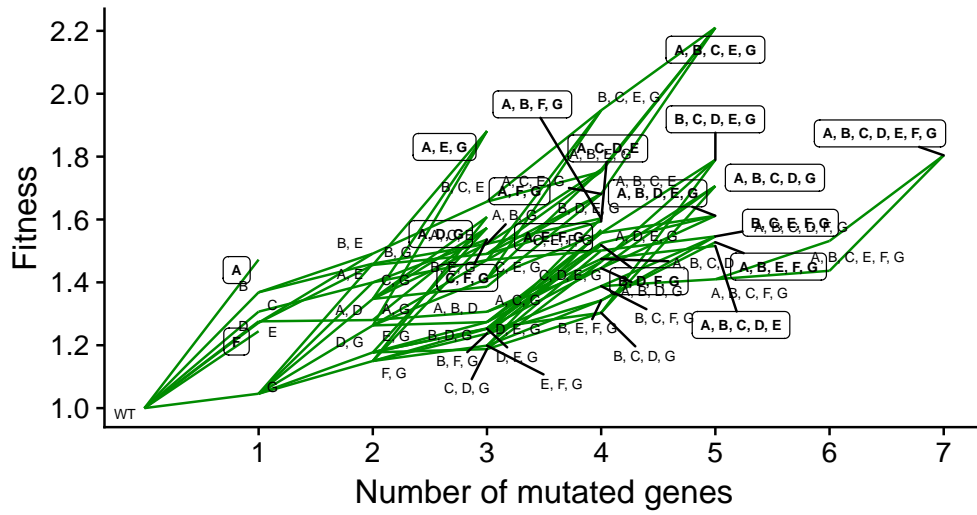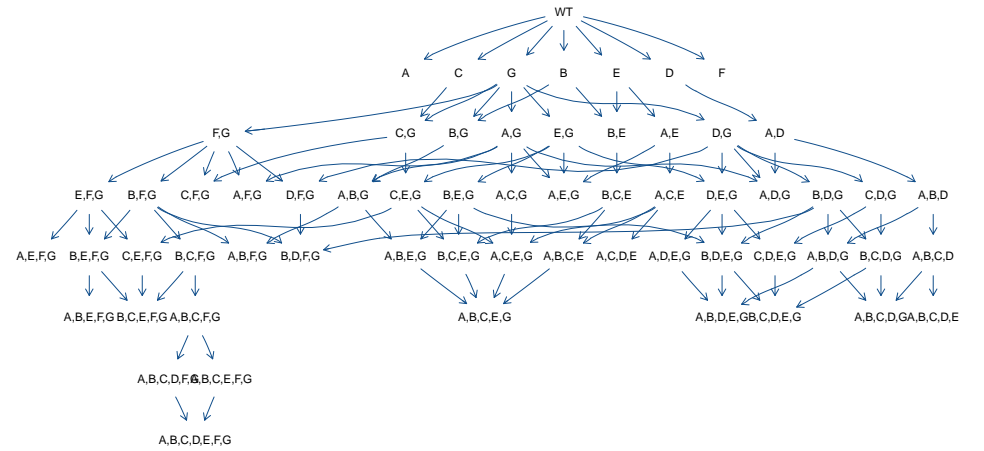

ID [GDVo4gmjaDr6Io1c](#)  
 acc genotypes 51  
 peaks no back 16  
 removed edges NA  
 prop rem edges NA

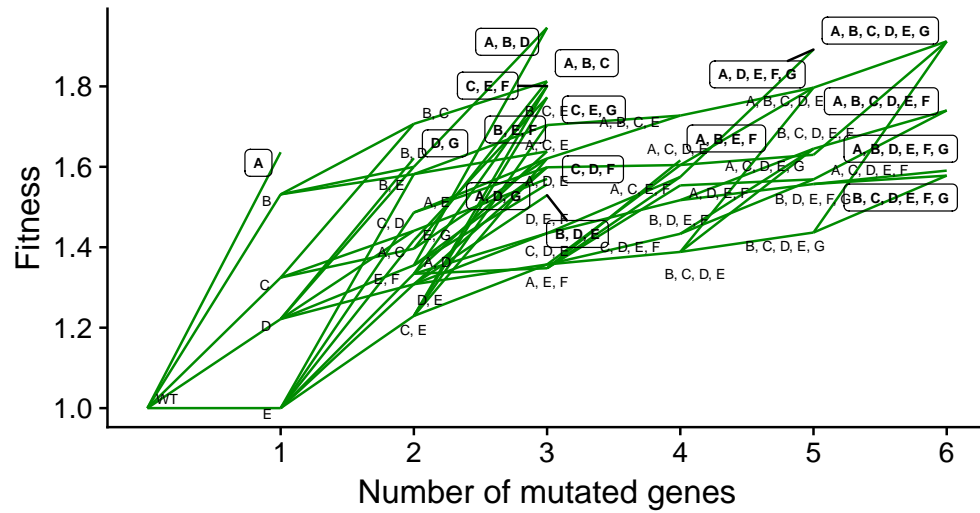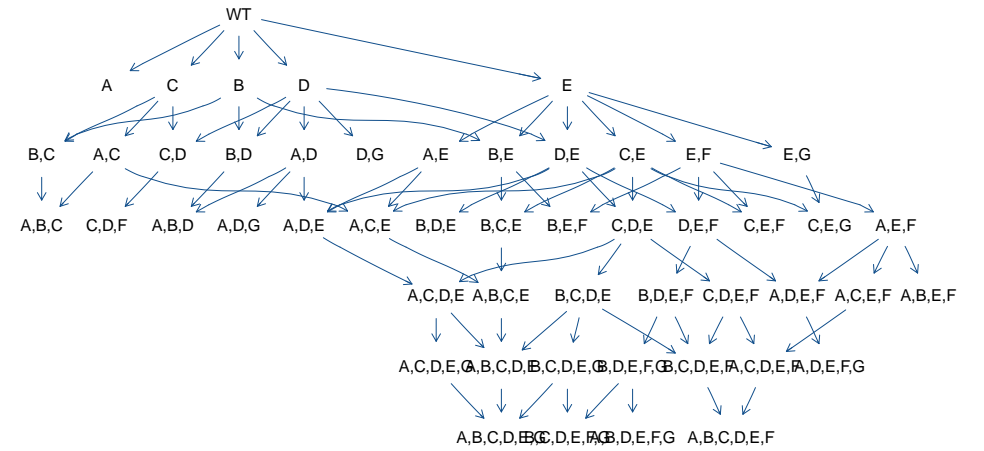

ID [gHFY6JsOn10PnBYf3](#)  
 acc genotypes 40  
 peaks no back 13  
 removed edges NA  
 prop rem edges NA

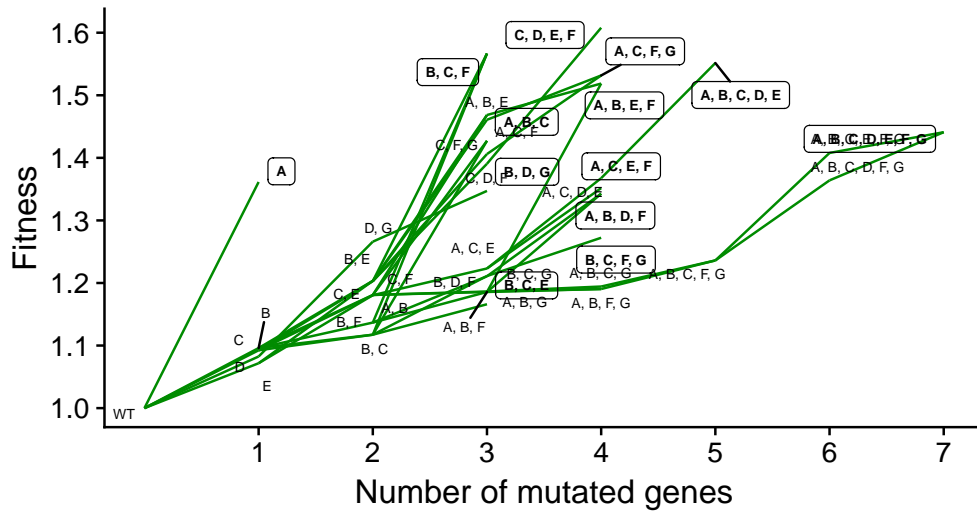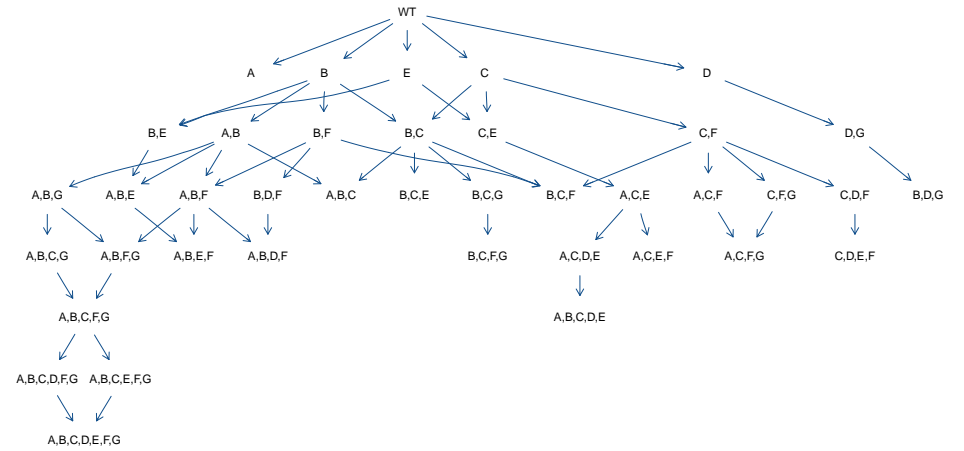

ID GJH85dNm2AtrzoUI  
 acc genotypes 30  
 peaks no back 13  
 removed edges NA  
 prop rem edges NA

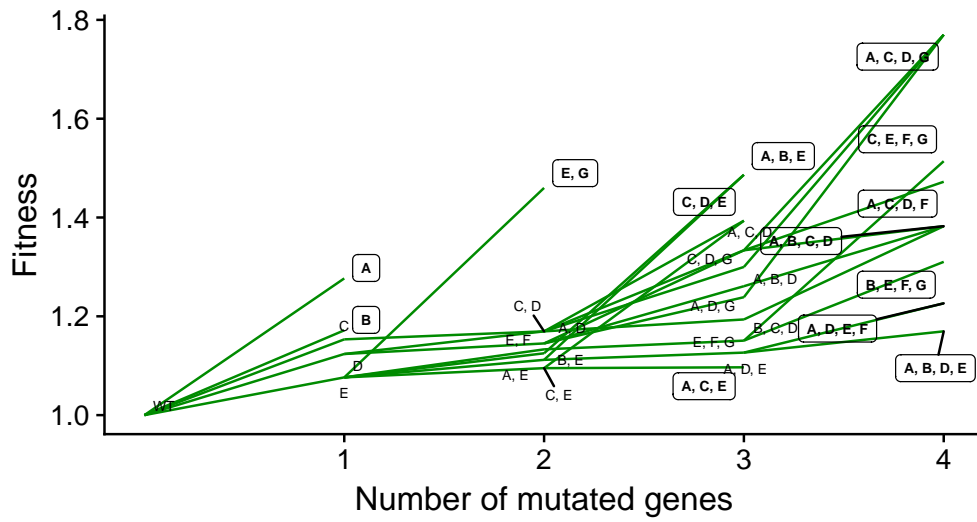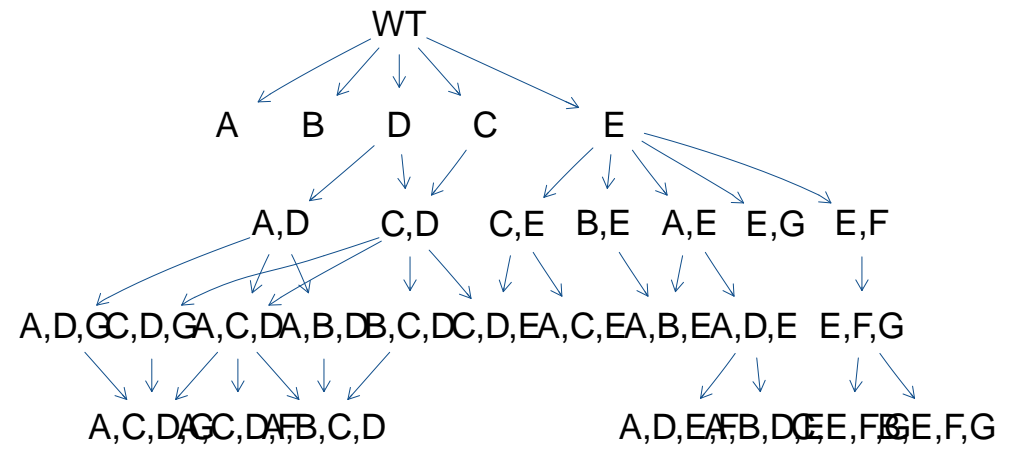

ID GrnJzITUvPUix6BN  
 acc genotypes 51  
 peaks no back 19  
 removed edges NA  
 prop rem edges NA

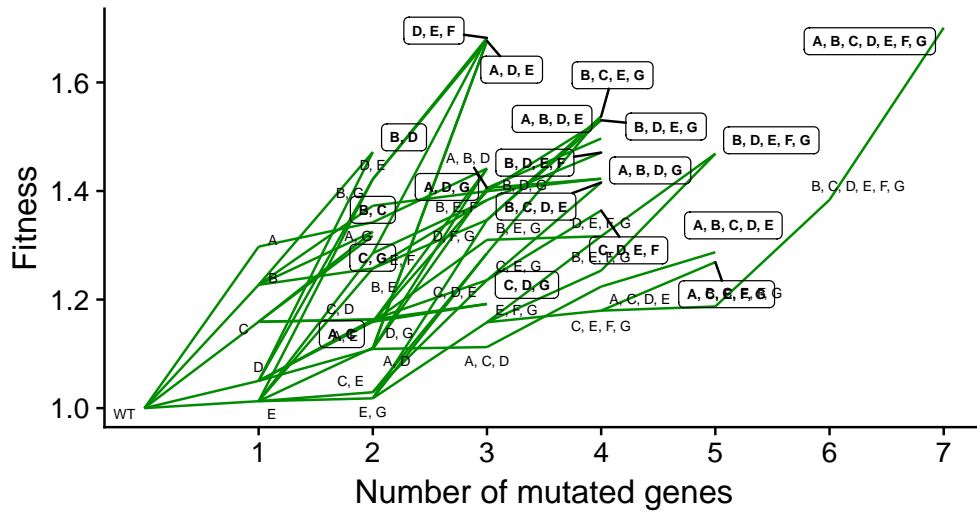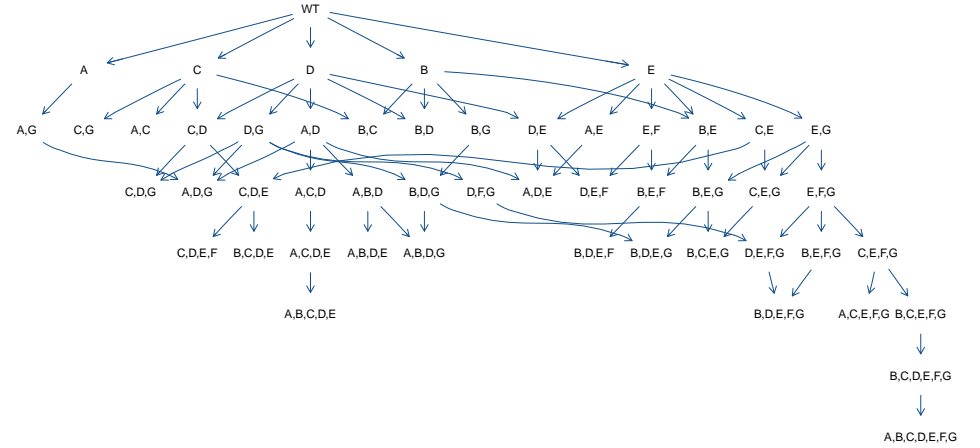



ID Hm3E9vk10sP85Ykfb  
 acc genotypes 14  
 peaks no back 6  
 removed edges NA  
 prop rem edges NA

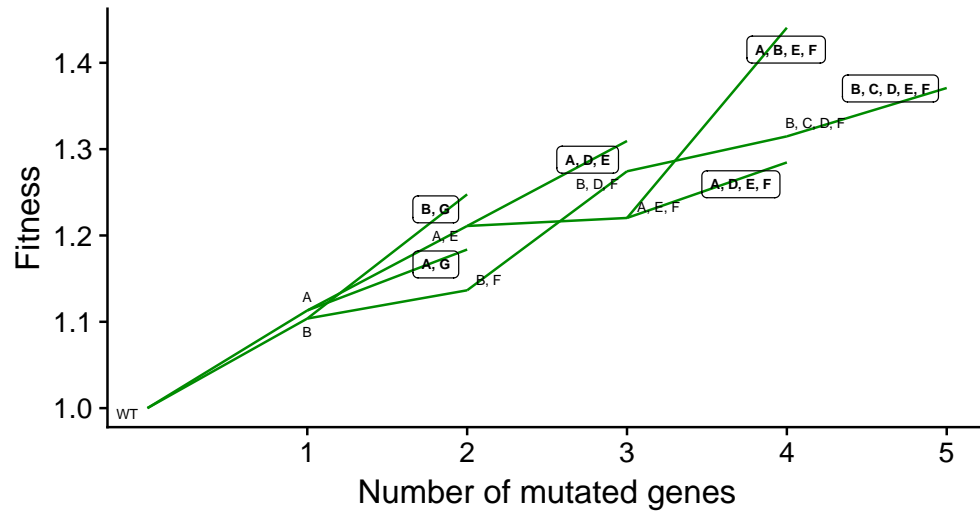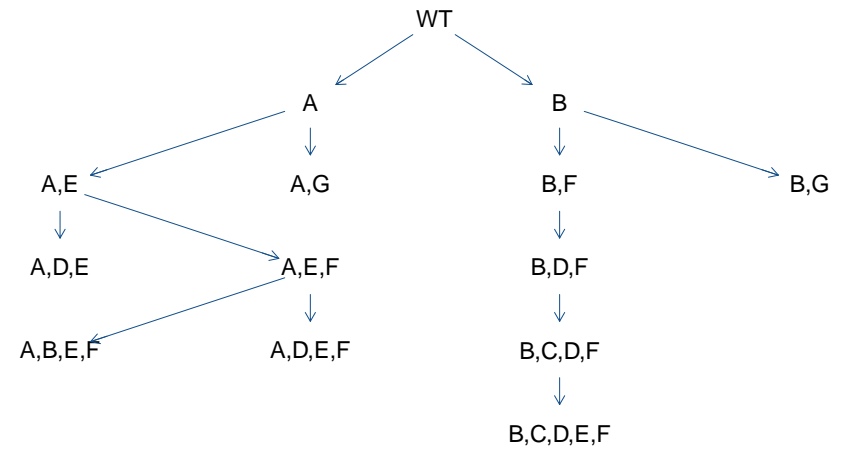

ID [hnKNlikQ9aKghXCm](#)  
 acc genotypes 36  
 peaks no back 14  
 removed edges NA  
 prop rem edges NA

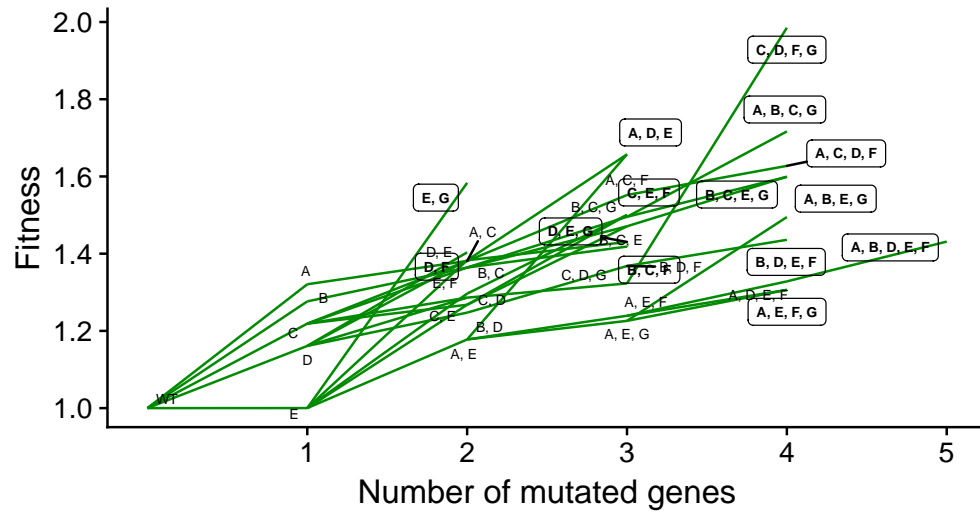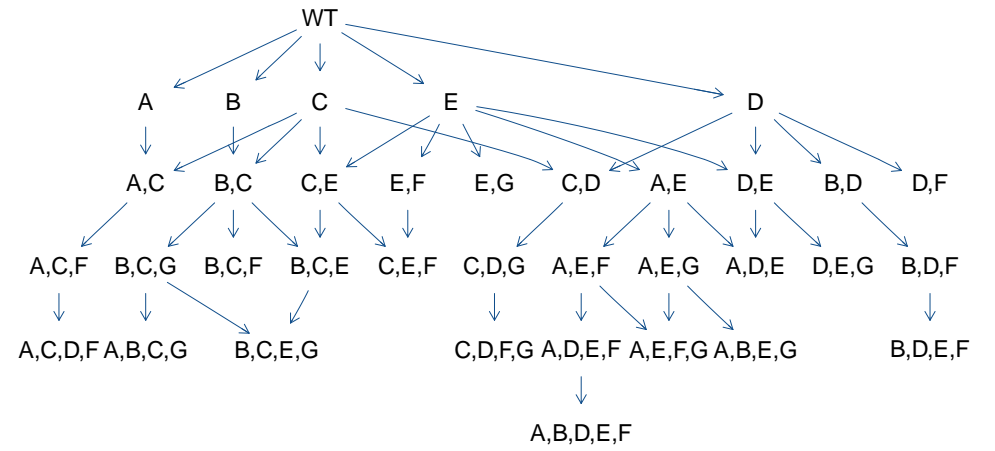

ID HUGD4mPFT3Y9PL8i  
 acc genotypes 18  
 peaks no back 4  
 removed edges NA  
 prop rem edges NA

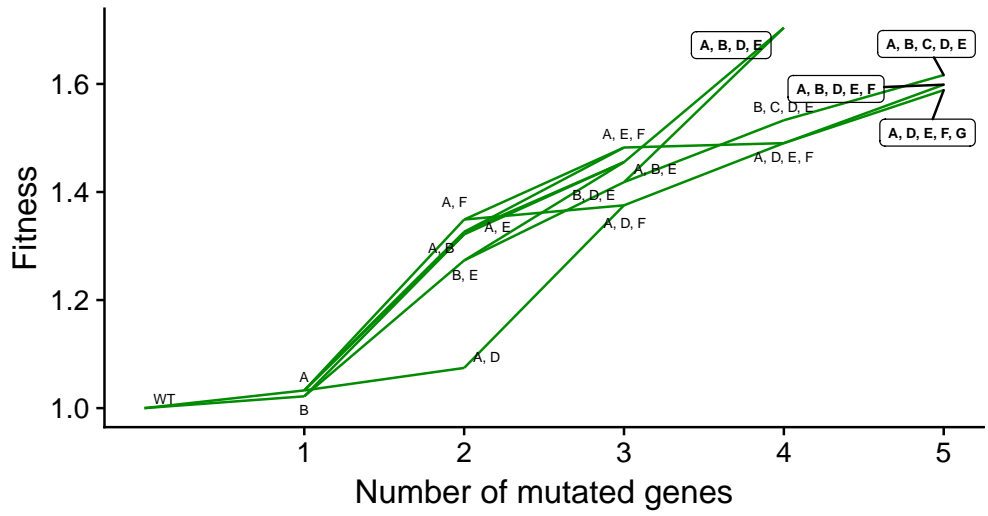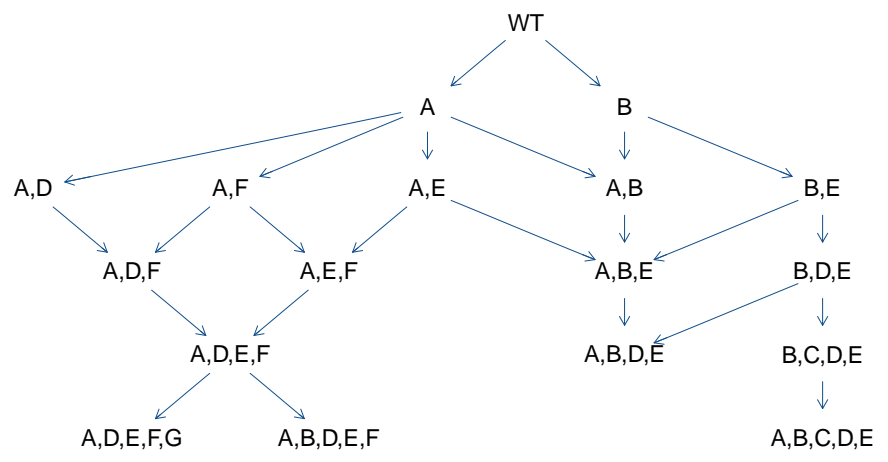

ID HVUm1KRpYXeSvmPO  
 acc genotypes 28  
 peaks no back 13  
 removed edges NA  
 prop rem edges NA

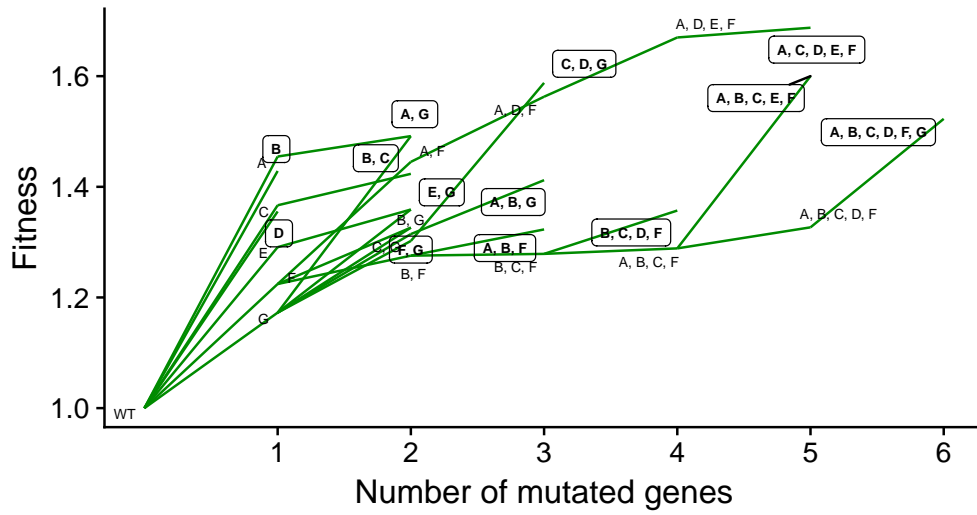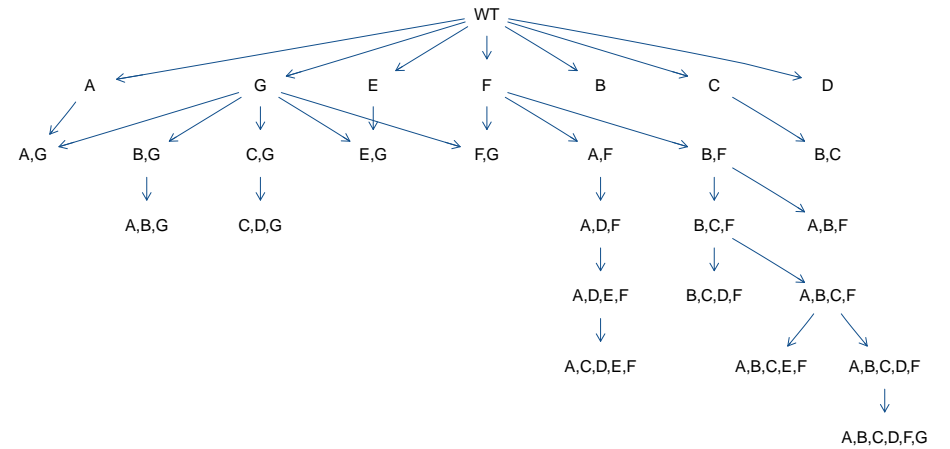

ID [hwWOucBKvmrZN9ue](#)  
 acc genotypes 55  
 peaks no back 15  
 removed edges NA  
 prop rem edges NA

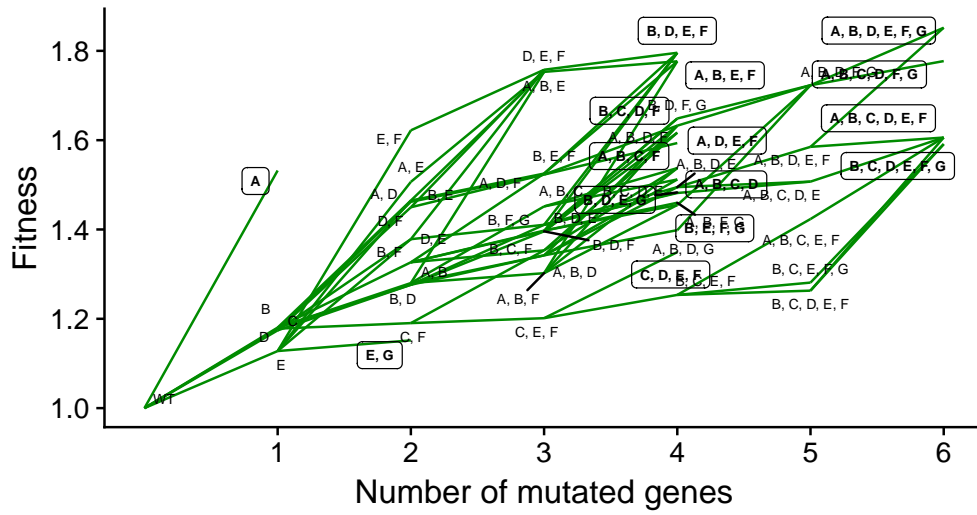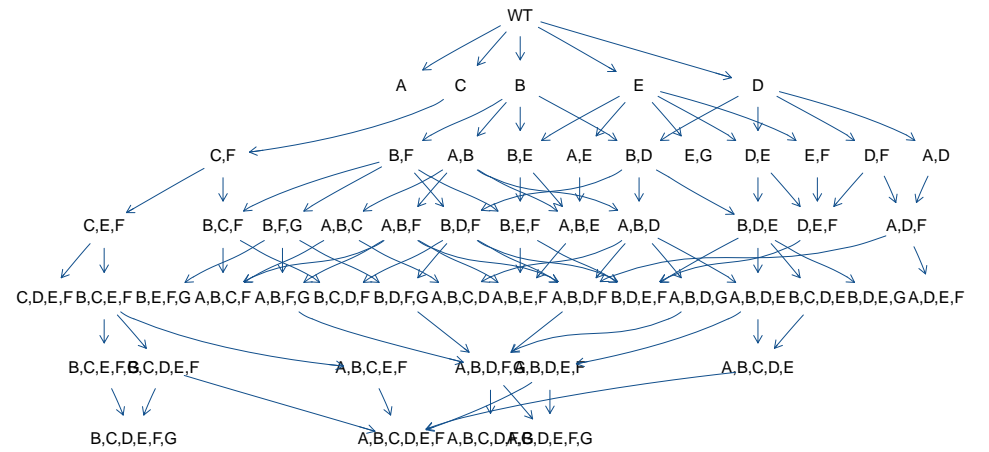

ID **hXnNgnV34hLXDvEz**  
 acc genotypes **49**  
 peaks no back **16**  
 removed edges **NA**  
 prop rem edges **NA**

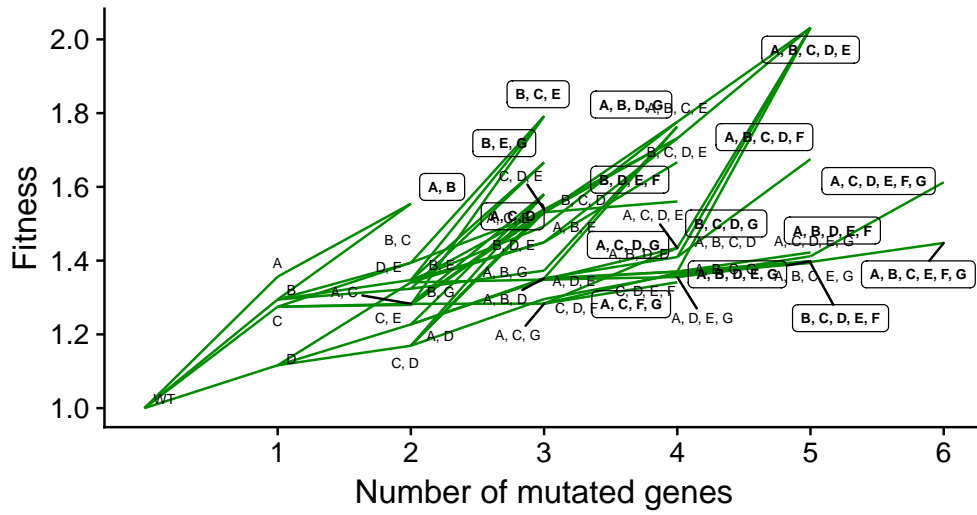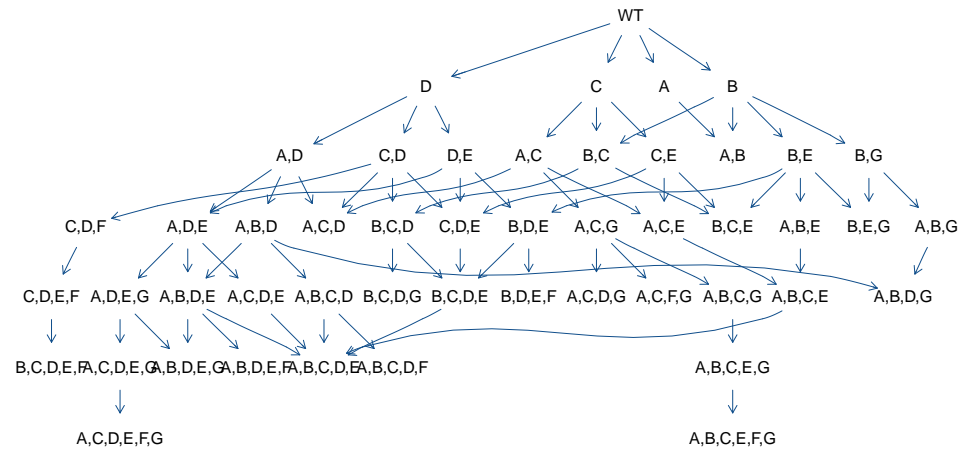

ID [hz9XzL5TRKBX18Xk](#)  
 acc genotypes 45  
 peaks no back 21  
 removed edges NA  
 prop rem edges NA

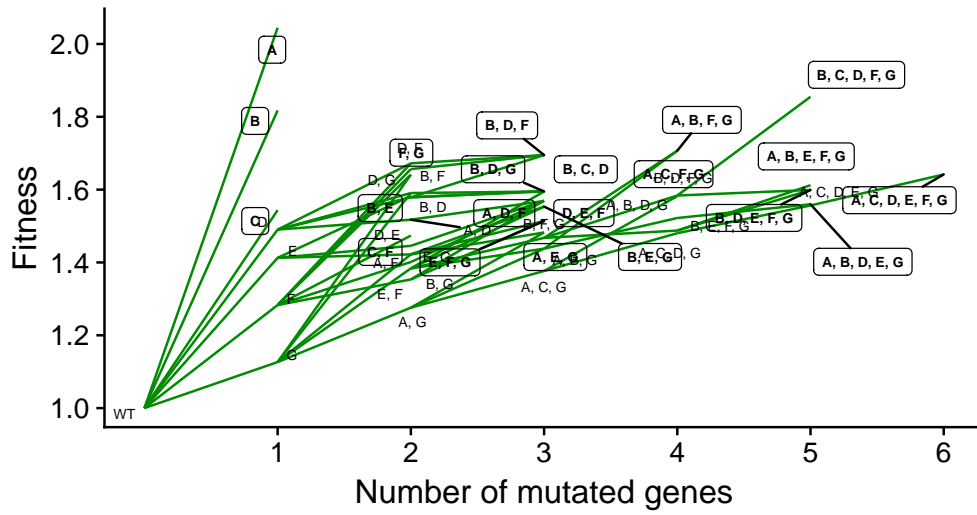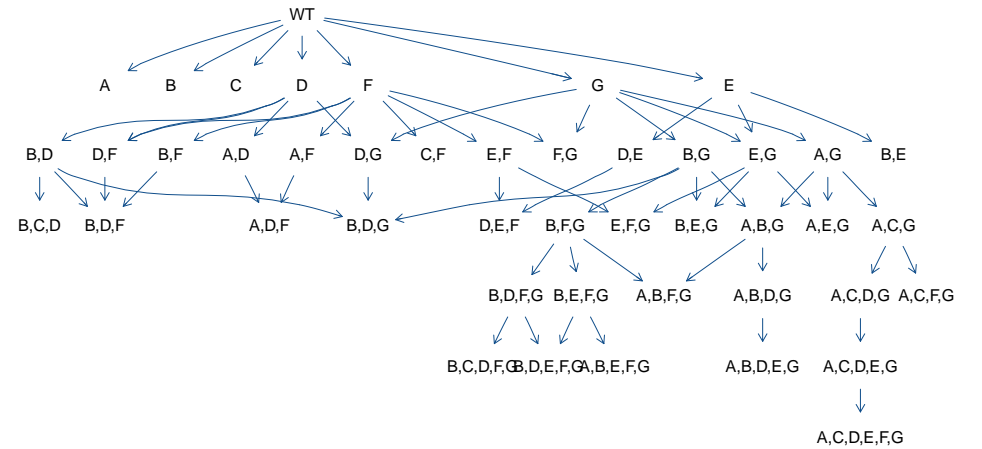

ID i102joVz69wXudllf  
 acc genotypes 26  
 peaks no back 11  
 removed edges NA  
 prop rem edges NA

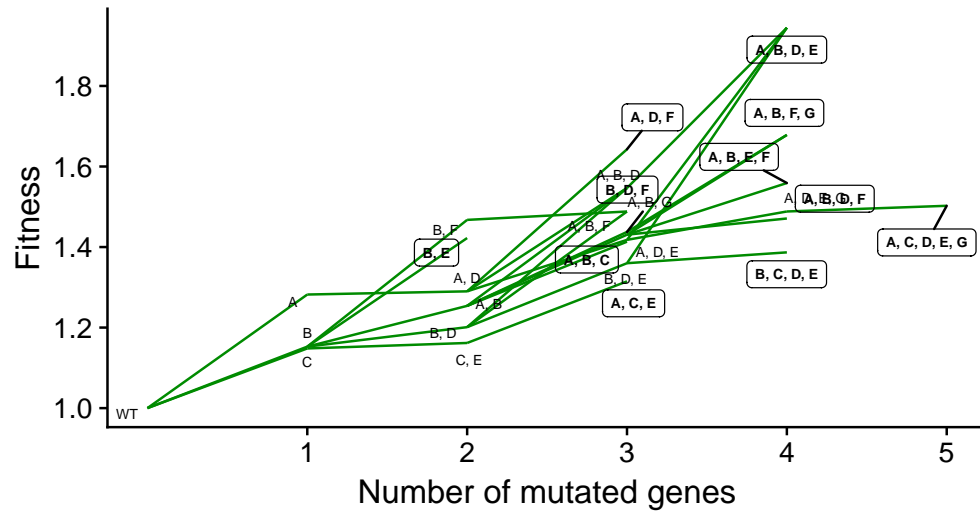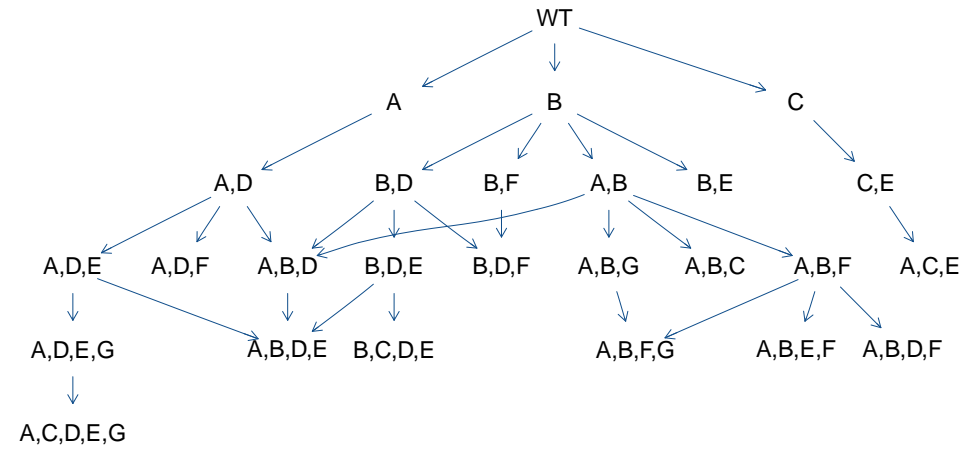



ID 14wGMzShjuo8XyuN  
 acc genotypes 43  
 peaks no back 18  
 removed edges NA  
 prop rem edges NA

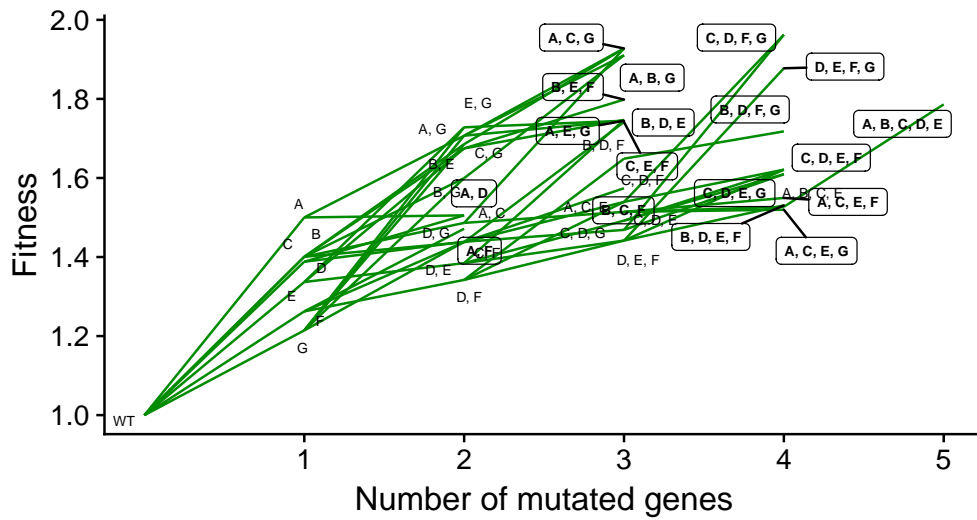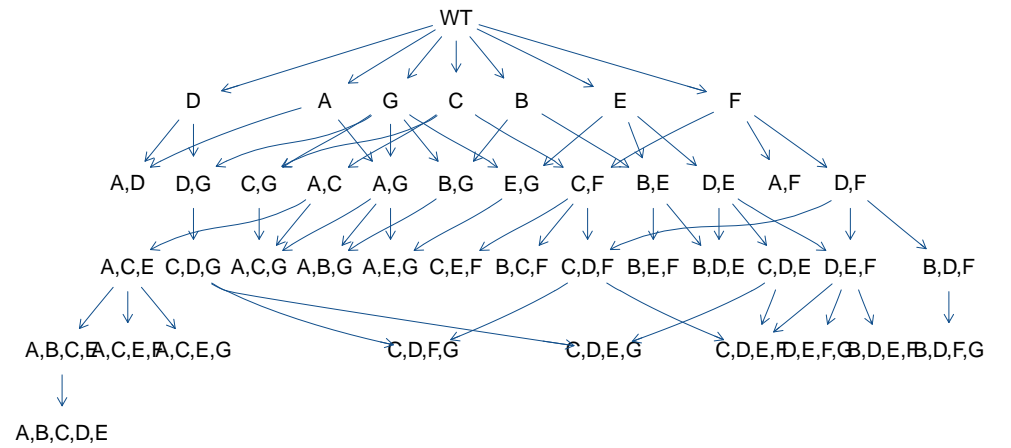

ID IDLT5qGFT3uM1rEn  
 acc genotypes 50  
 peaks no back 19  
 removed edges NA  
 prop rem edges NA

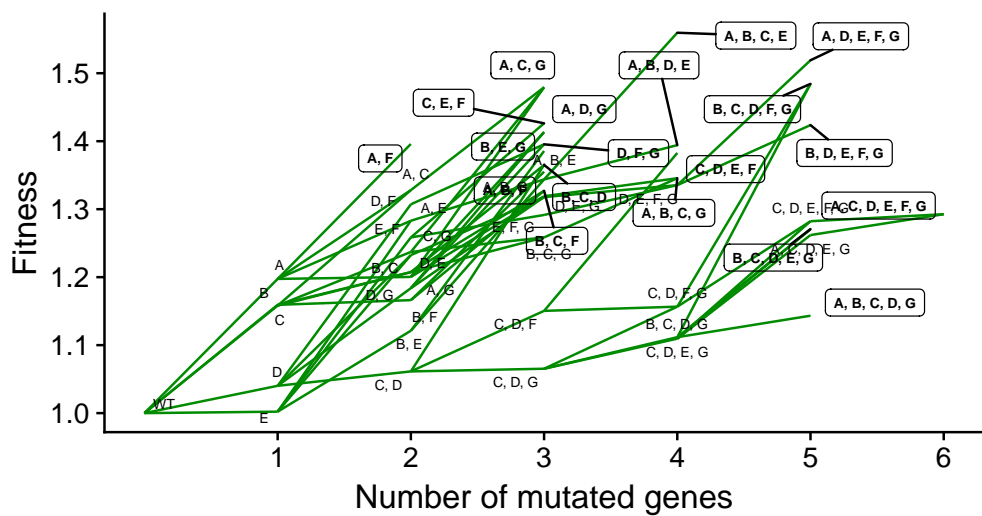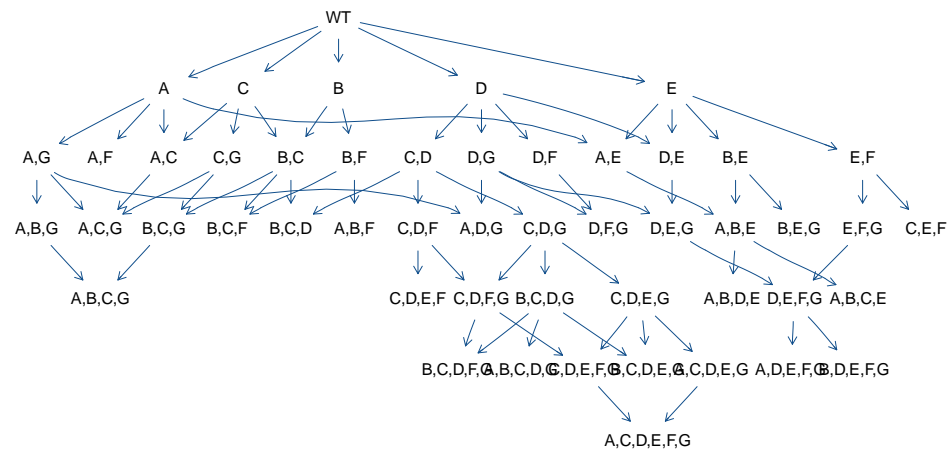

ID [IJ110hVtdsgYgvoV7](#)  
 acc genotypes 46  
 peaks no back 10  
 removed edges NA  
 prop rem edges NA

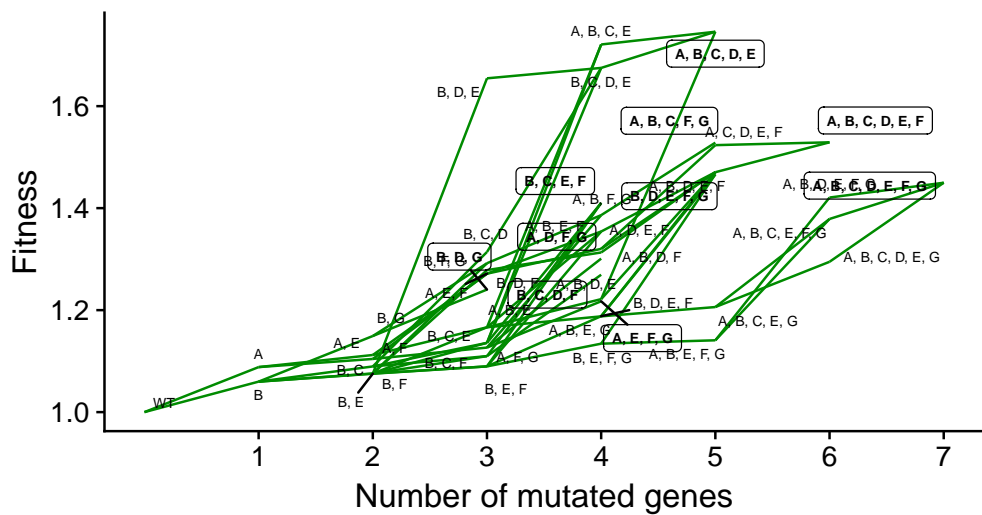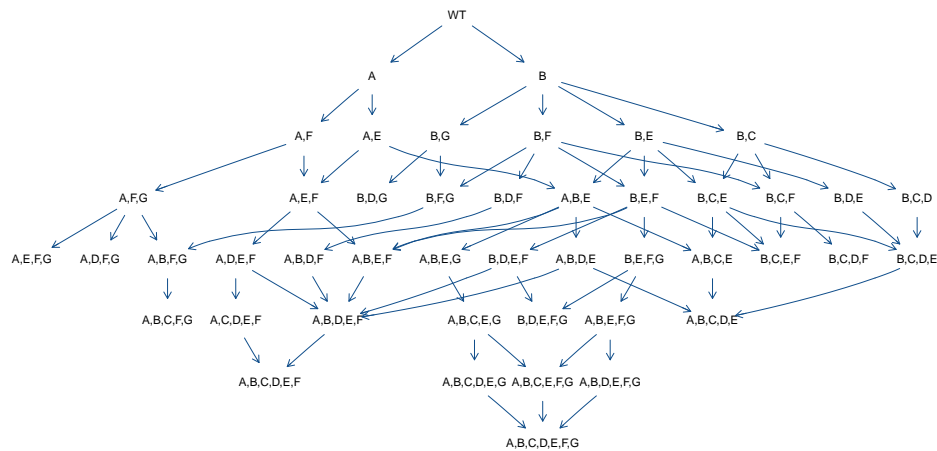

ID [iuizHj29wSFmqntf](#)  
 acc genotypes 39  
 peaks no back 17  
 removed edges NA  
 prop rem edges NA

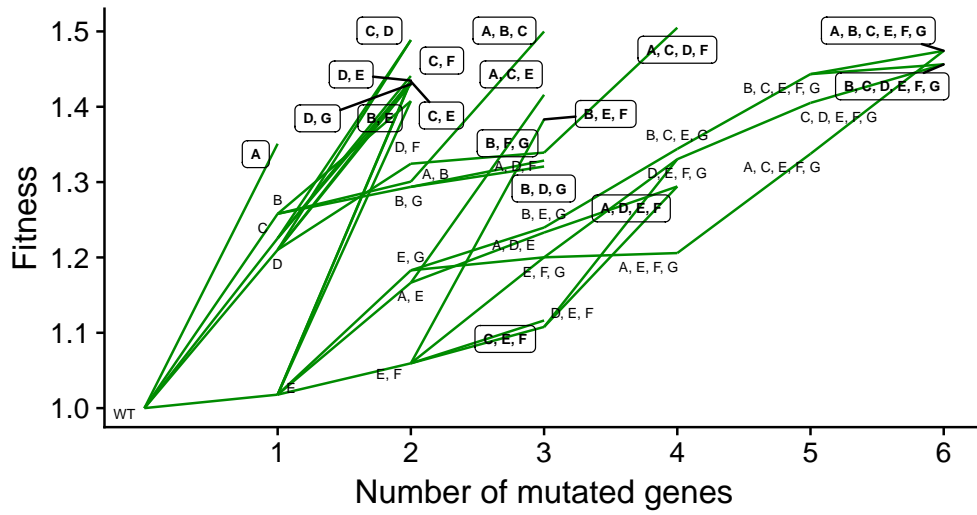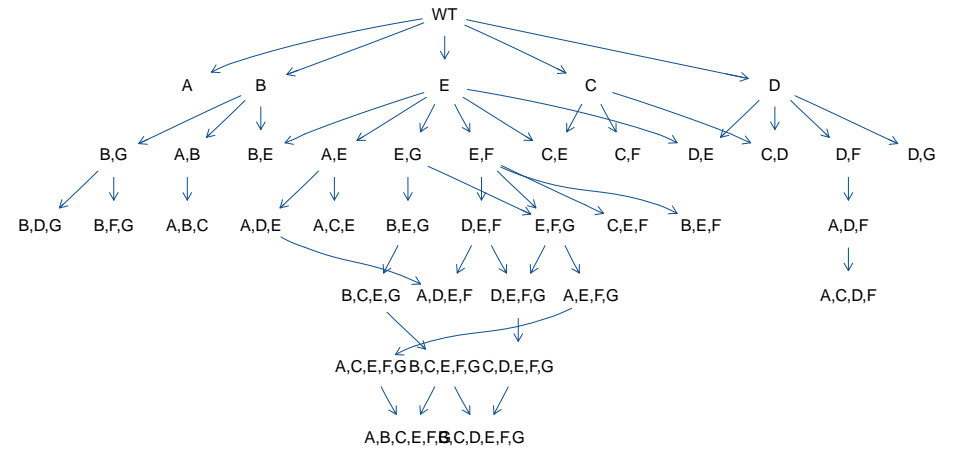

ID [jARDfKjvS5xglbjy](#)  
 acc genotypes 32  
 peaks no back 12  
 removed edges NA  
 prop rem edges NA

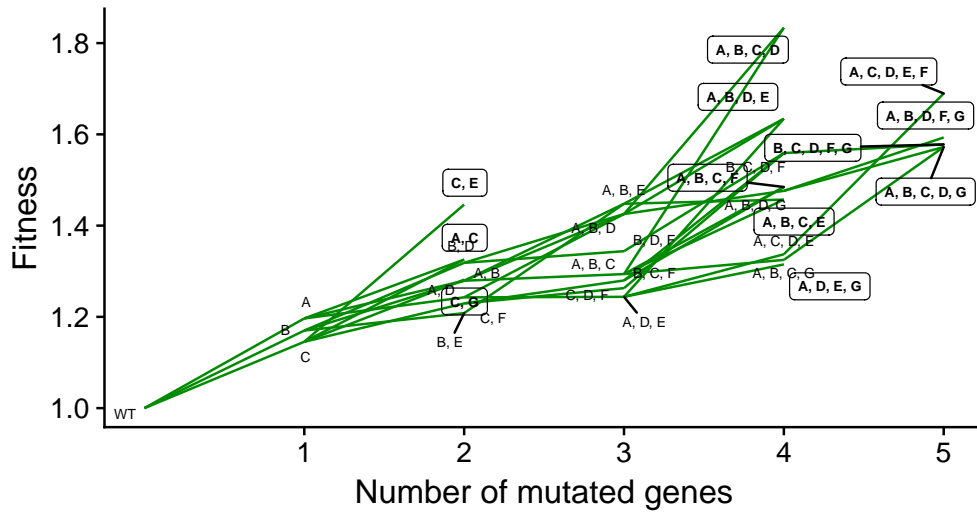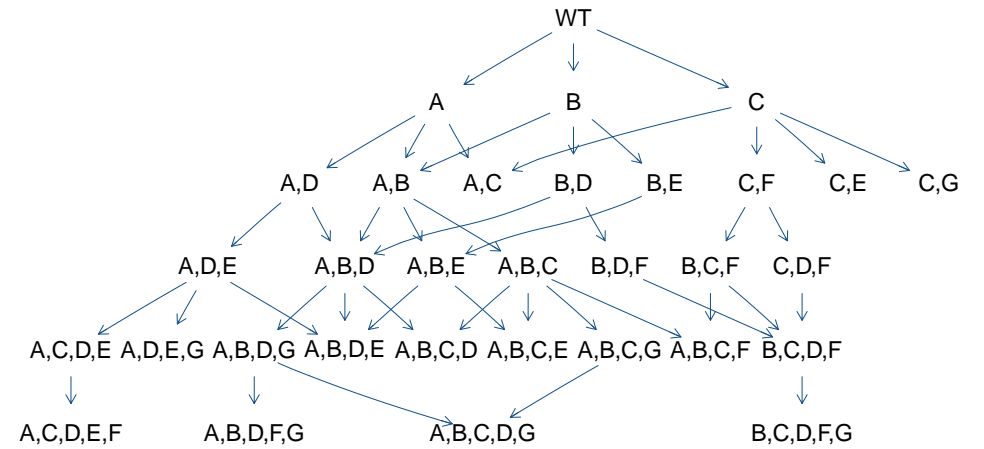

ID **JC7USXL8yt3B9M10N**  
 acc genotypes **36**  
 peaks no back **15**  
 removed edges **NA**  
 prop rem edges **NA**

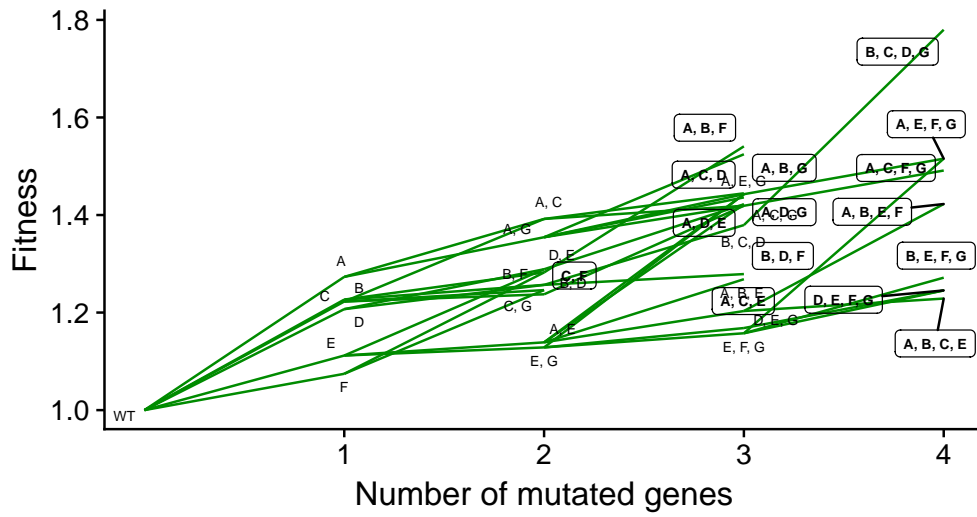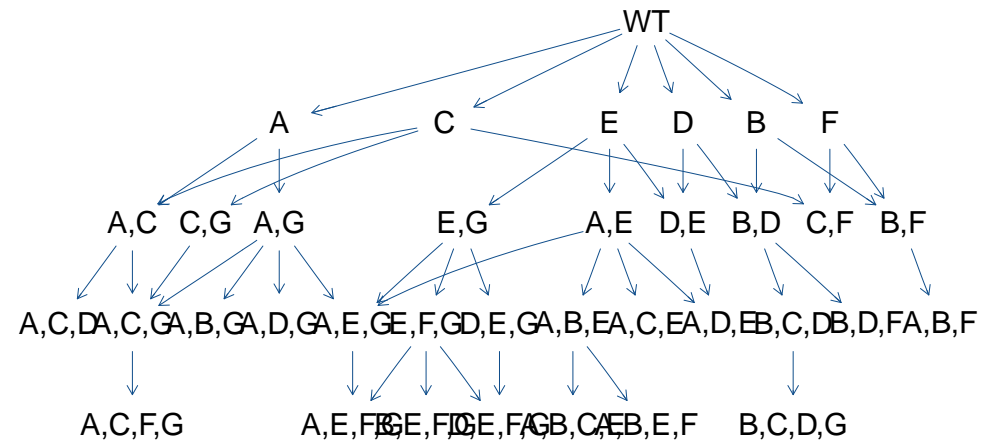

ID [JdlK10Z6a5TIQp5](#)  
 acc genotypes 21  
 peaks no back 7  
 removed edges NA  
 prop rem edges NA

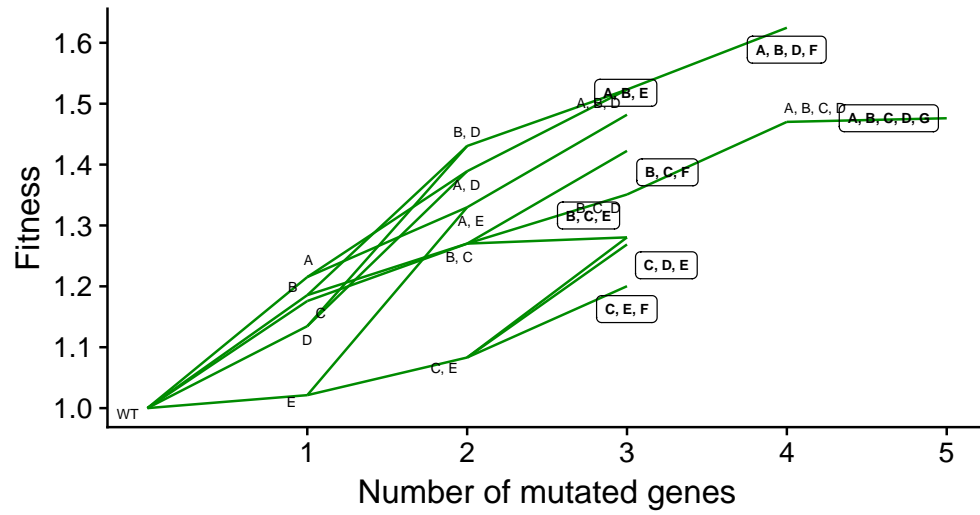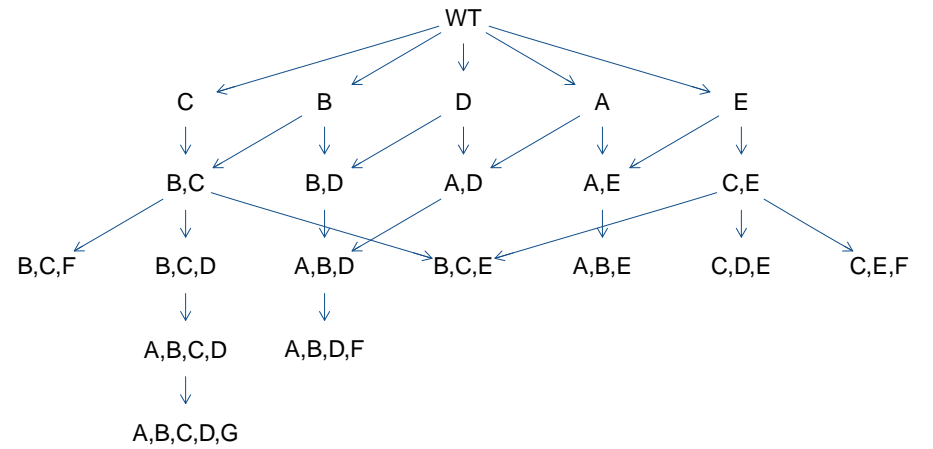

ID jKqQ5oUGT4cTflw  
 acc genotypes 11  
 peaks no back 5  
 removed edges NA  
 prop rem edges NA

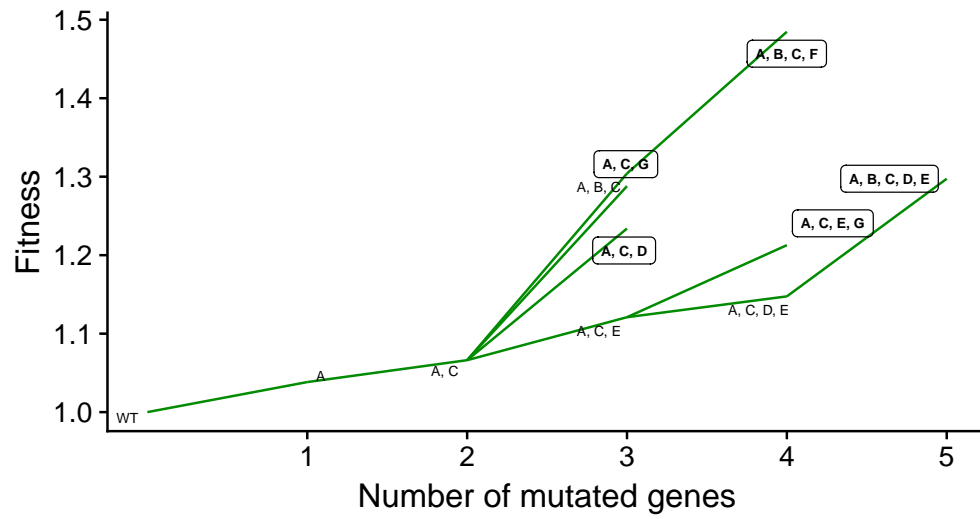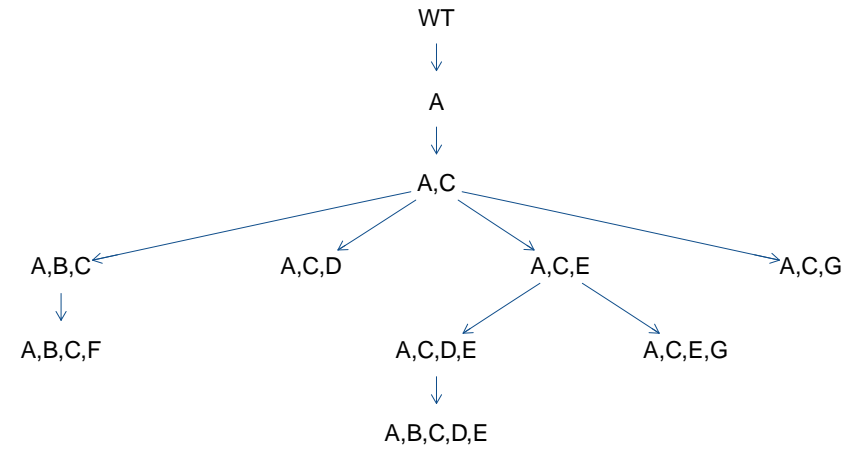



ID JqytTKKThh5QBbf  
 acc genotypes 11  
 peaks no back 5  
 removed edges NA  
 prop rem edges NA

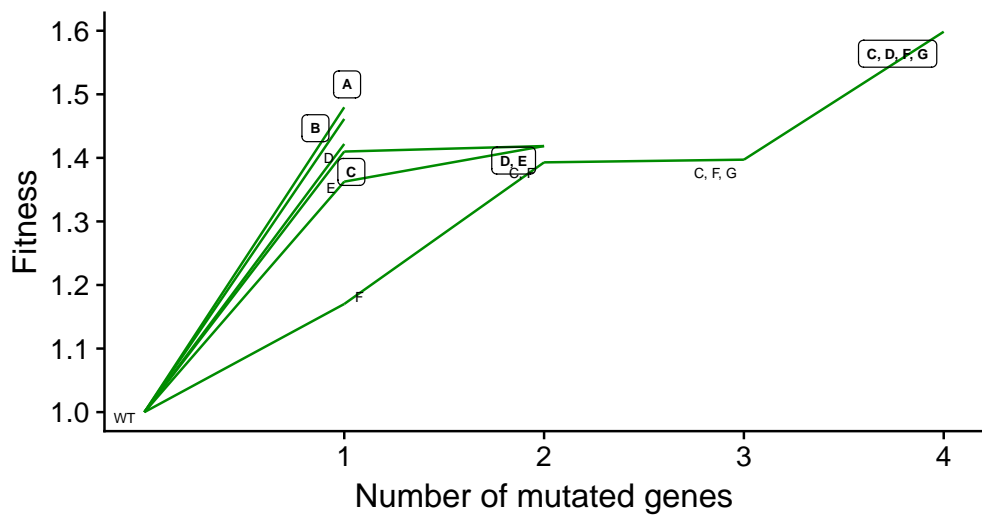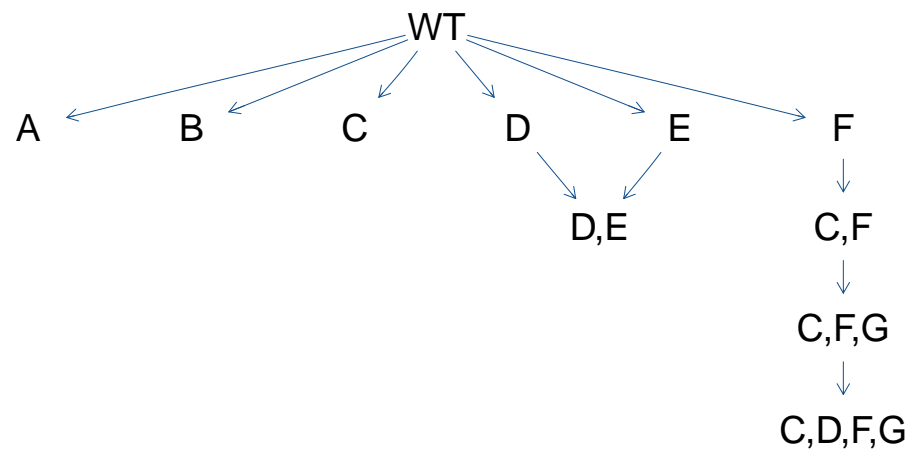

ID [jvGYmalFWHjDSsr](#)  
 acc genotypes 39  
 peaks no back 15  
 removed edges NA  
 prop rem edges NA

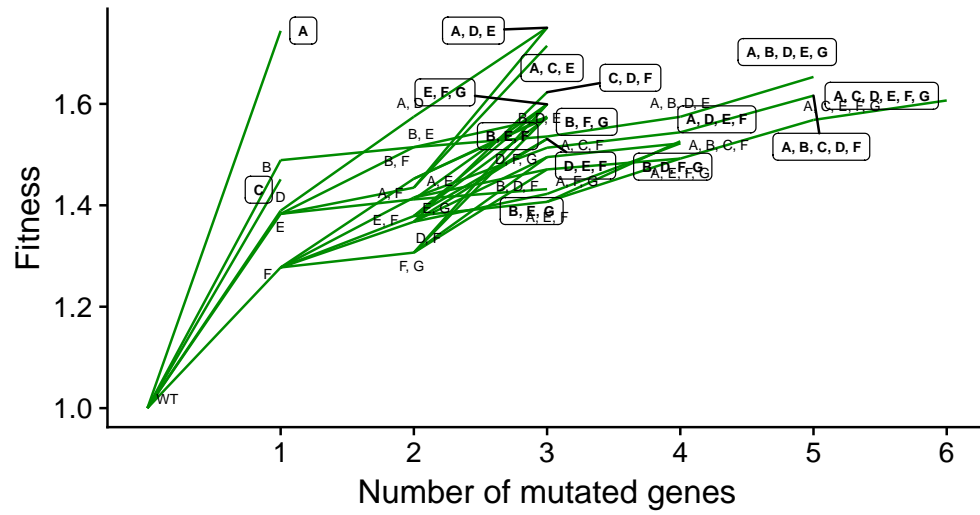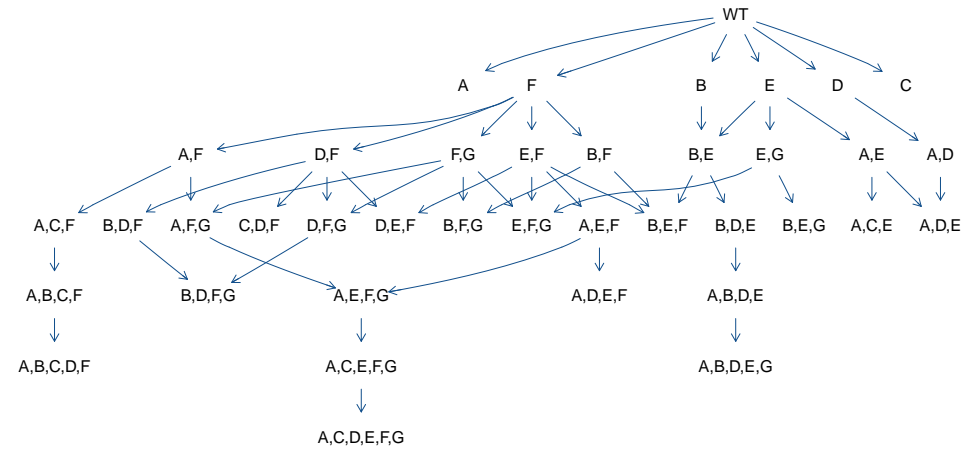

ID [jvTSHGXJvbnFtVlt](#)  
 acc genotypes 30  
 peaks no back 9  
 removed edges NA  
 prop rem edges NA

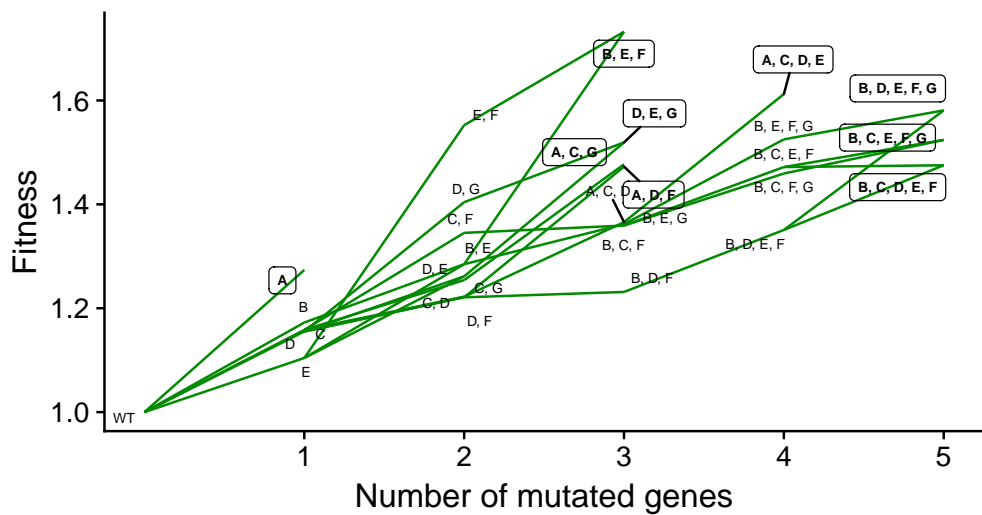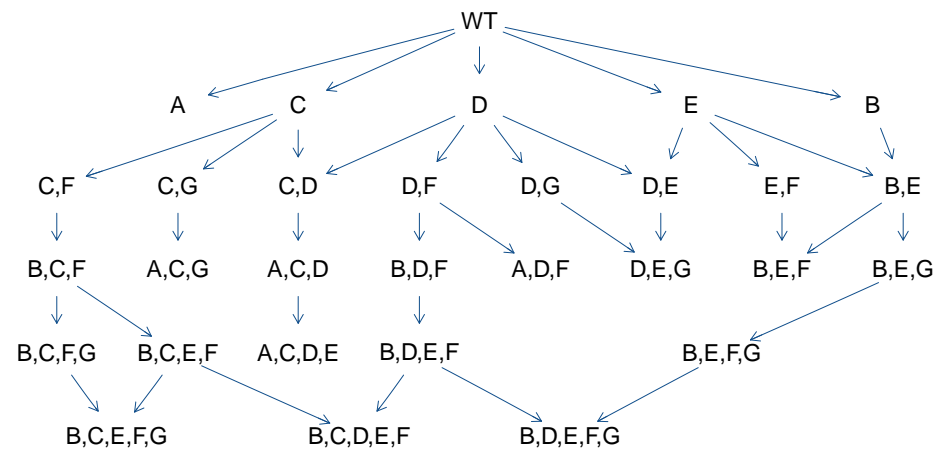

ID [k4wHgtkweyDrnCn8](#)  
 acc genotypes 80  
 peaks no back 17  
 removed edges NA  
 prop rem edges NA

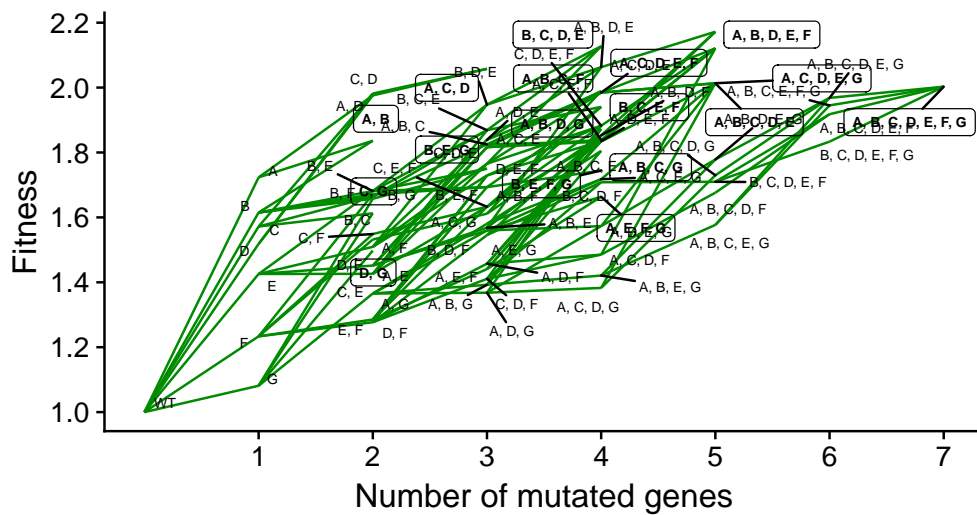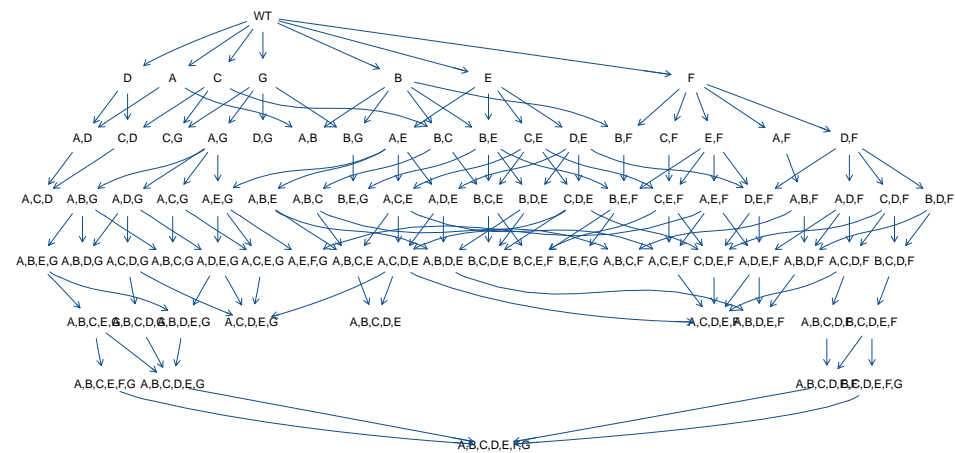

ID [kd10vK9jGcoOkaAMm](#)  
 acc genotypes 75  
 peaks no back 7  
 removed edges NA  
 prop rem edges NA

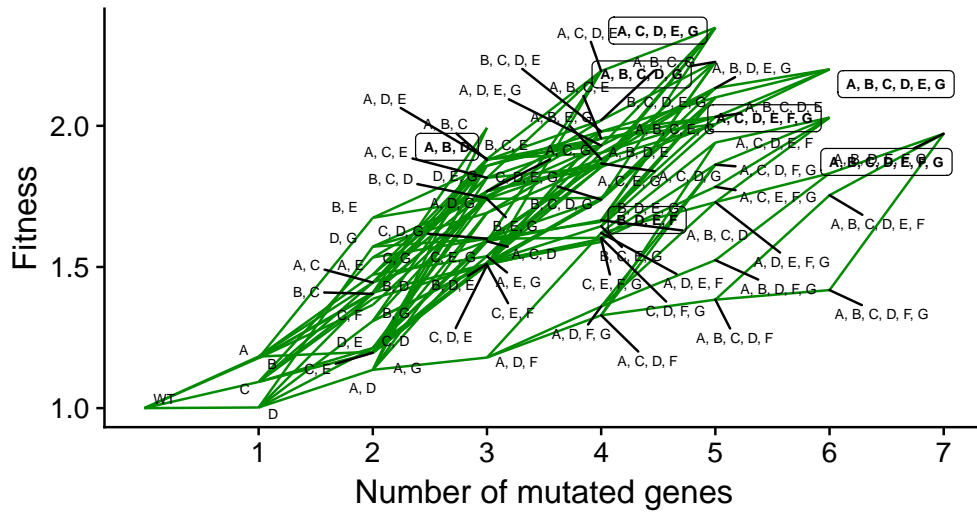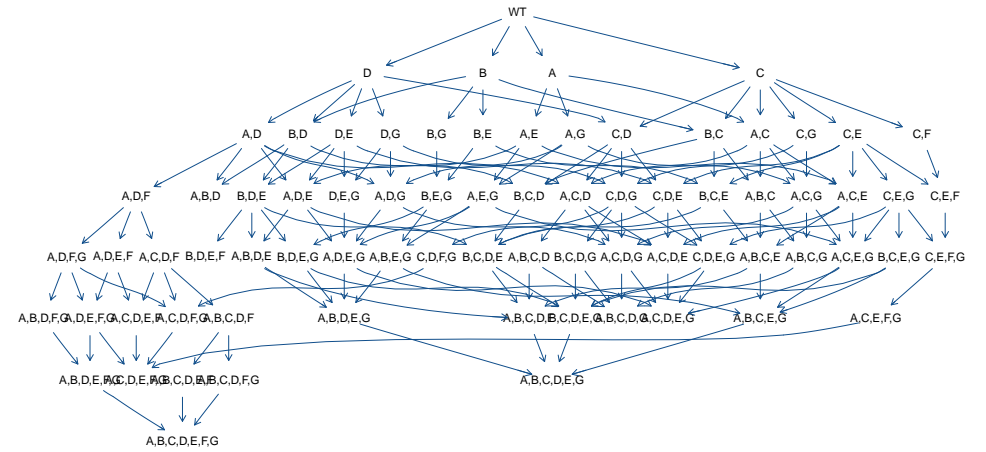

ID [kfB7NOK1J247FNsy](#)  
 acc genotypes 18  
 peaks no back 8  
 removed edges NA  
 prop rem edges NA

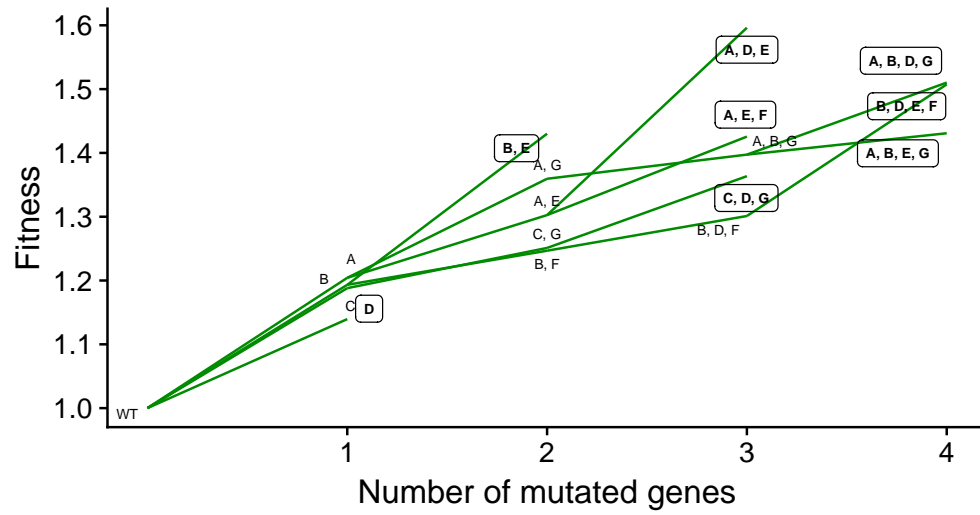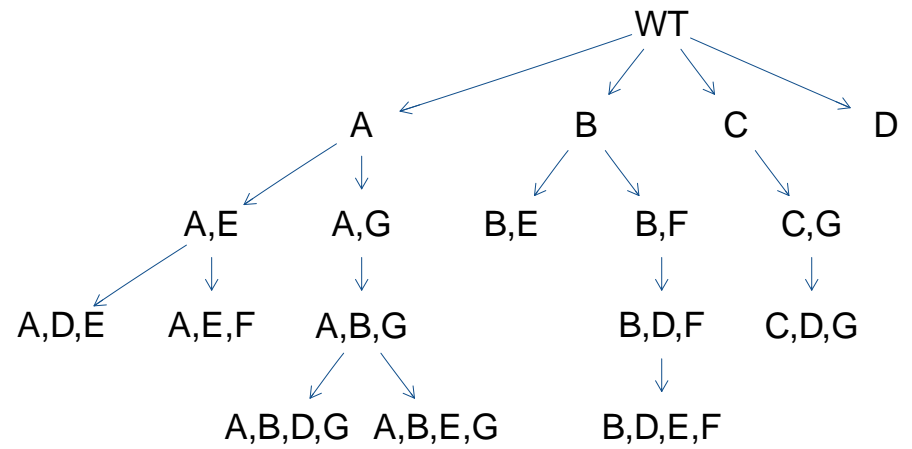

ID **kfC76EeHnueEMkzE**  
 acc genotypes **70**  
 peaks no back **19**  
 removed edges **NA**  
 prop rem edges **NA**

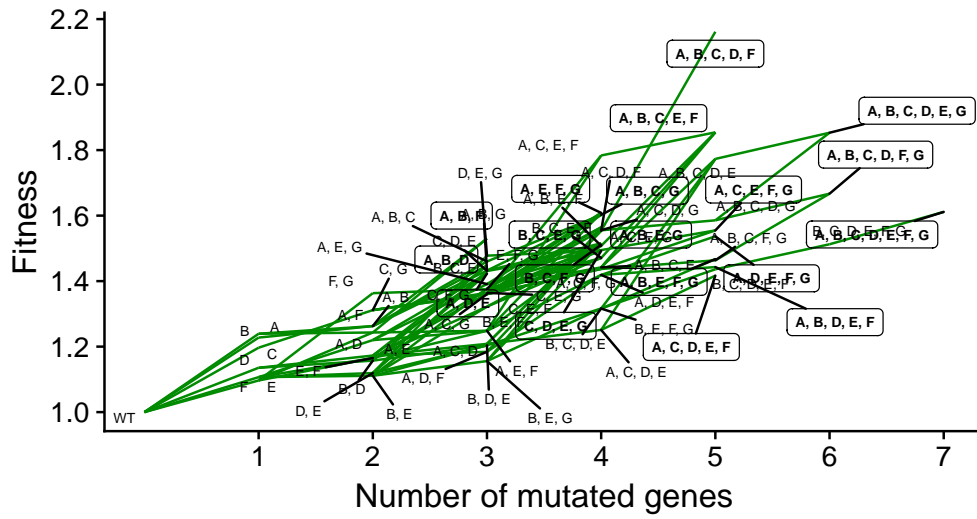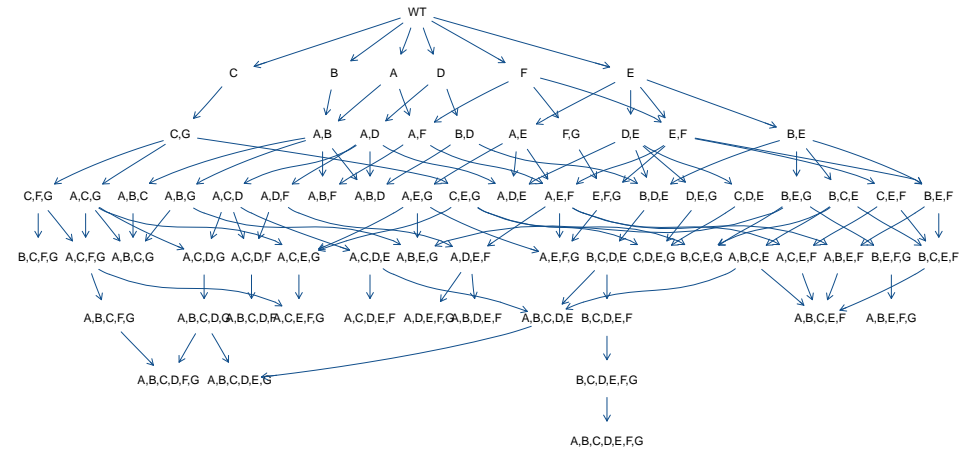

ID knzBi4rUYms1ZmCY  
 acc genotypes 57  
 peaks no back 20  
 removed edges NA  
 prop rem edges NA

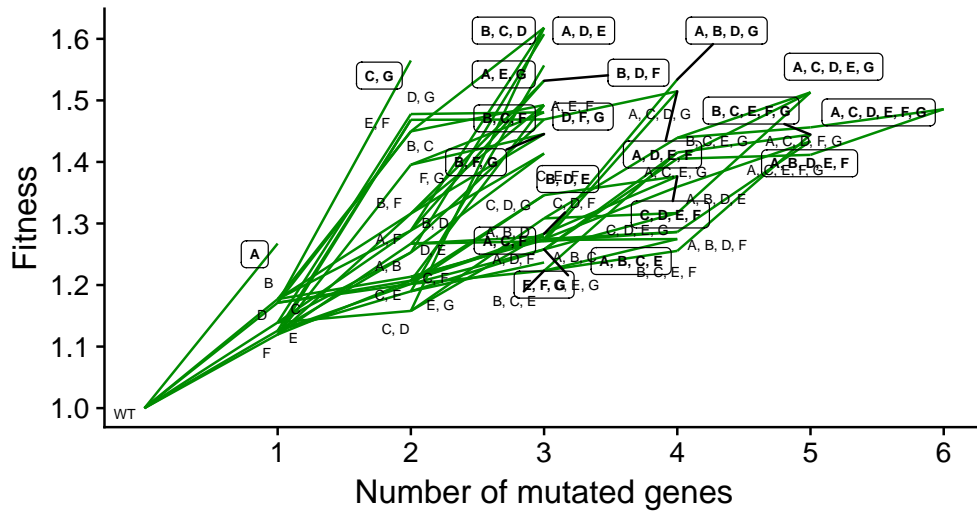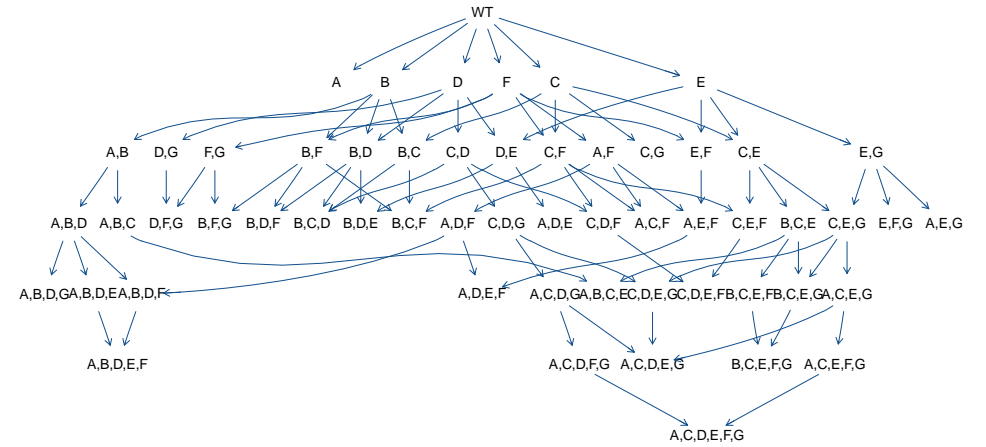



ID [KRi7SXjpurE910L5q](#)  
 acc genotypes 37  
 peaks no back 13  
 removed edges NA  
 prop rem edges NA

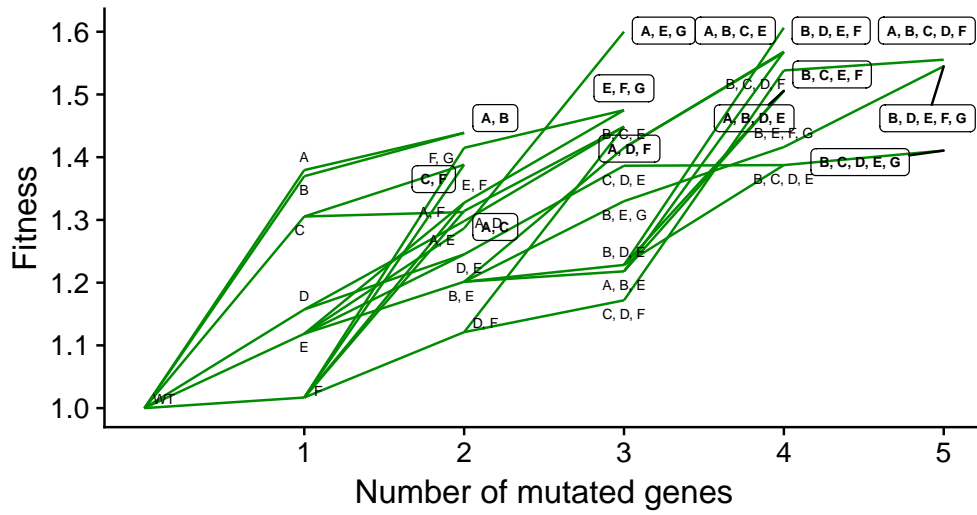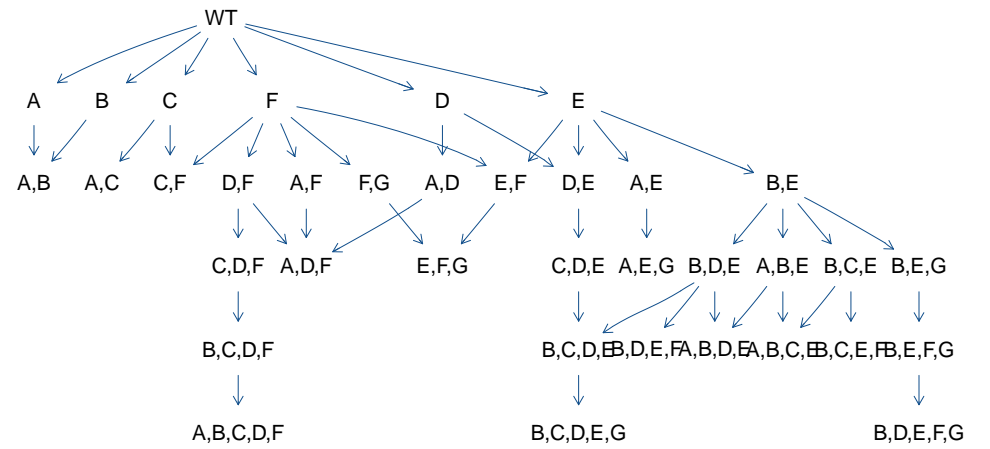

ID **KwdXNcrapMR7uPi7**  
 acc genotypes **31**  
 peaks no back 10  
 removed edges NA  
 prop rem edges NA

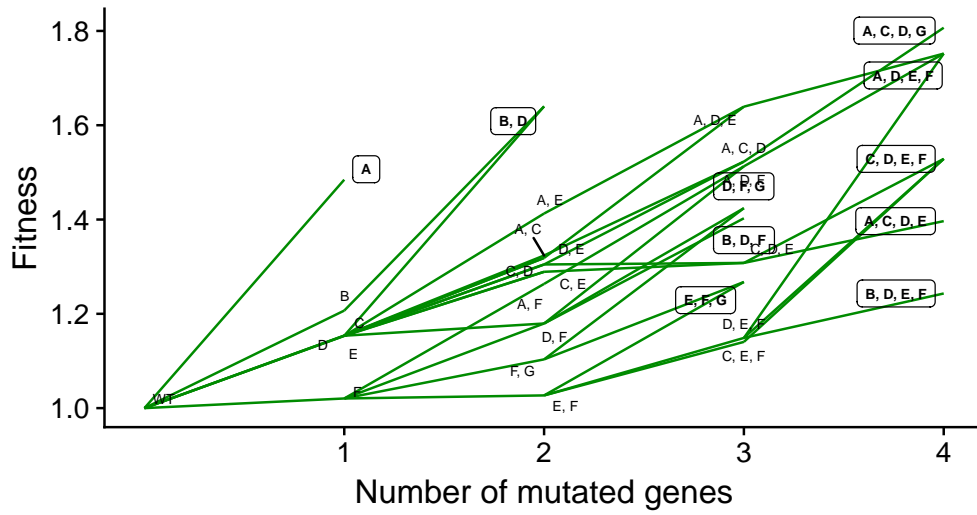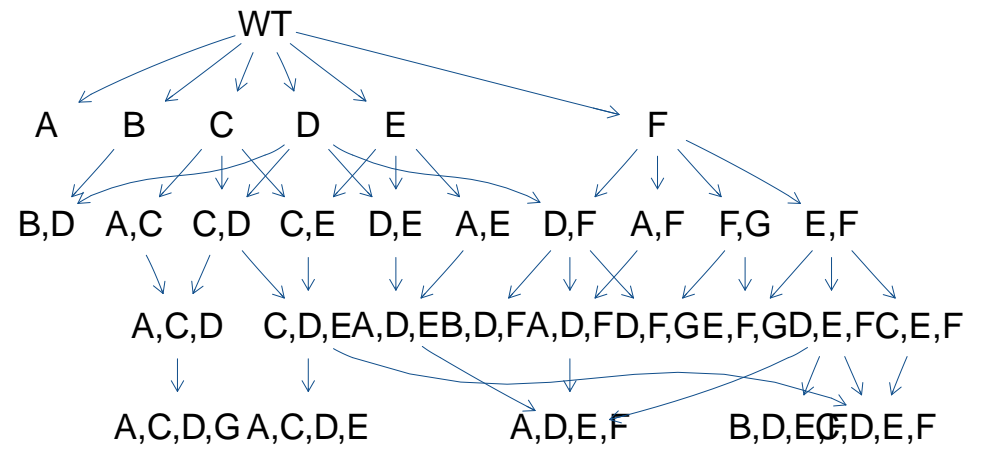

ID L53nf1rd3BsJMUlj  
 acc genotypes 53  
 peaks no back 20  
 removed edges NA  
 prop rem edges NA

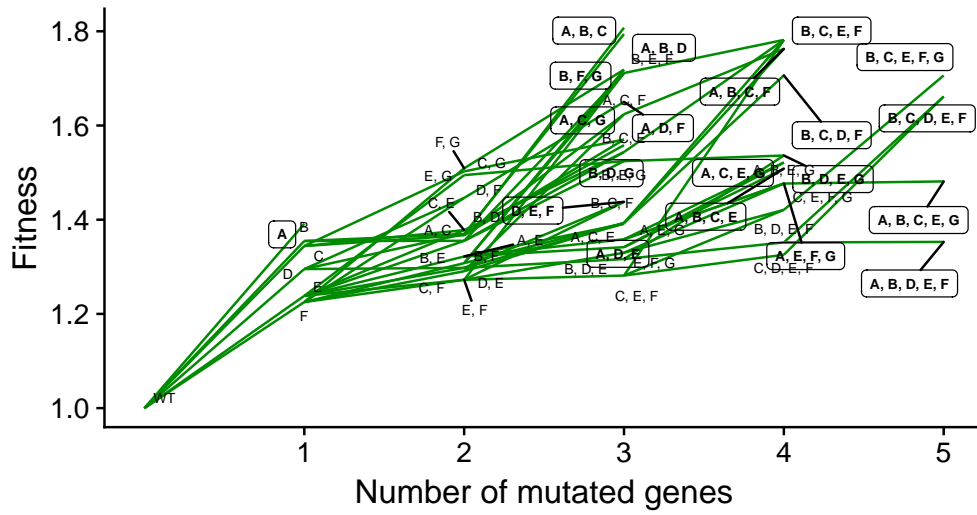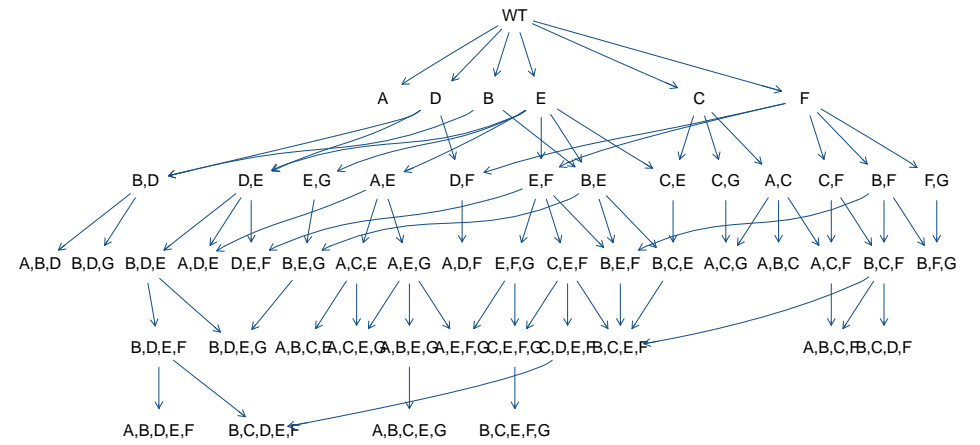

ID L96VgnsLKl1UgcXs  
 acc genotypes 29  
 peaks no back 10  
 removed edges NA  
 prop rem edges NA

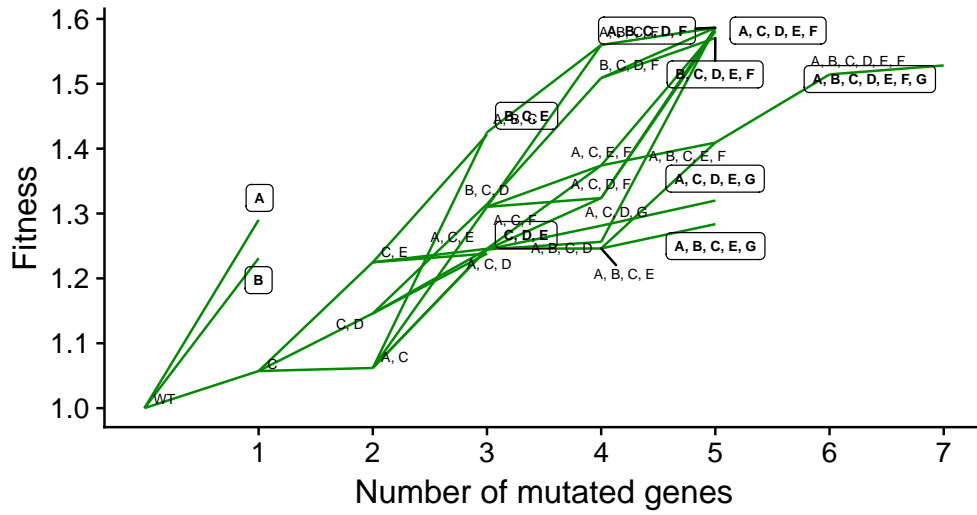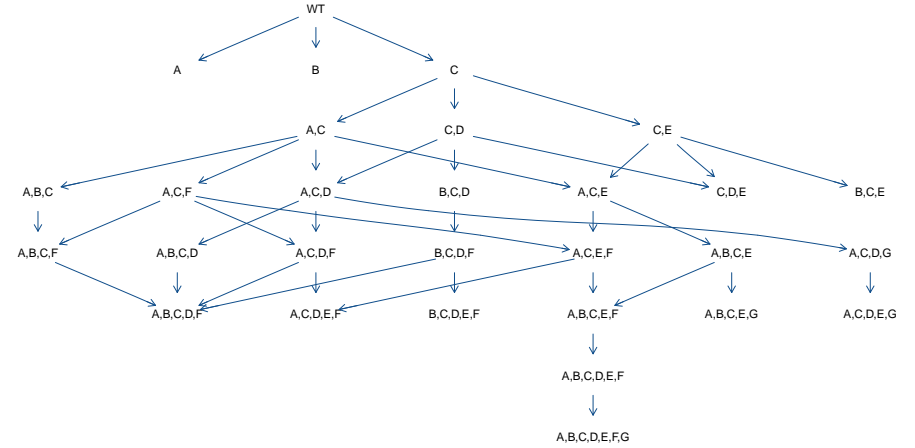

ID IG7VsdckSOB10Utw8  
 acc genotypes 40  
 peaks no back 13  
 removed edges NA  
 prop rem edges NA

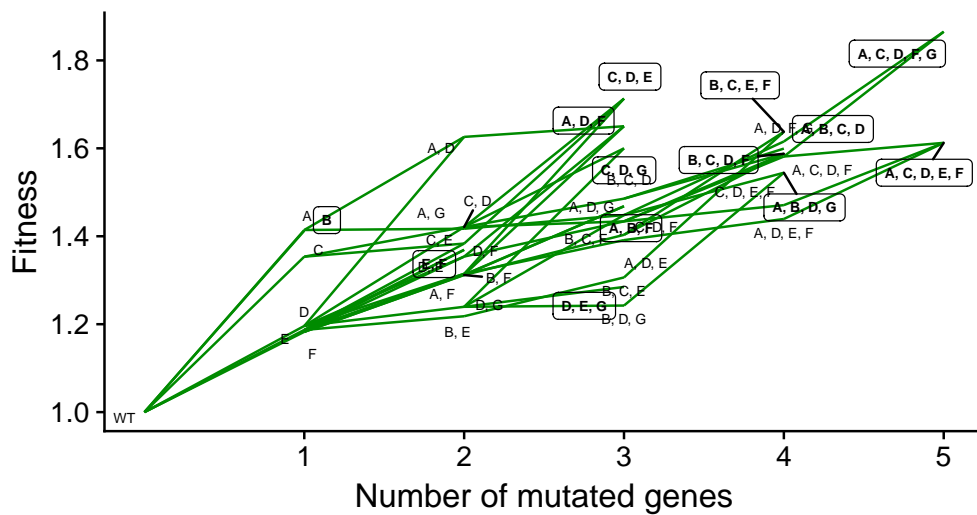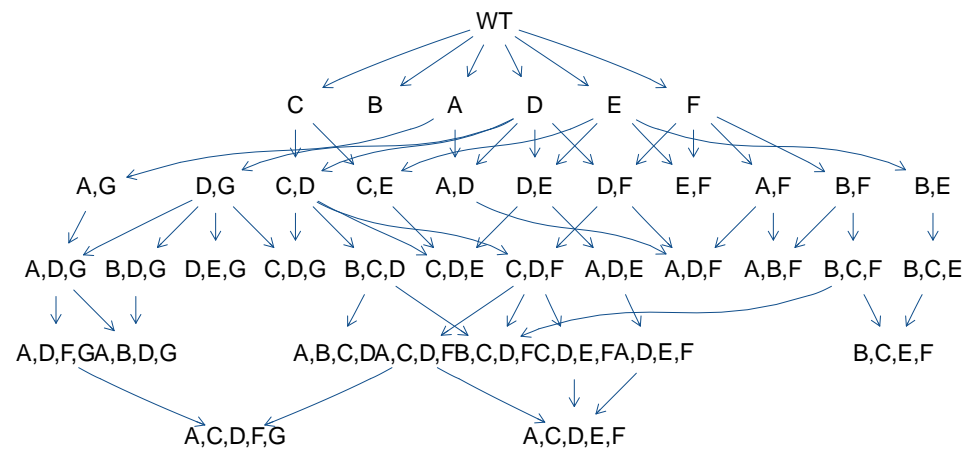

ID [LJ27j18rSPxKS2A9](#)  
 acc genotypes 52  
 peaks no back 19  
 removed edges NA  
 prop rem edges NA

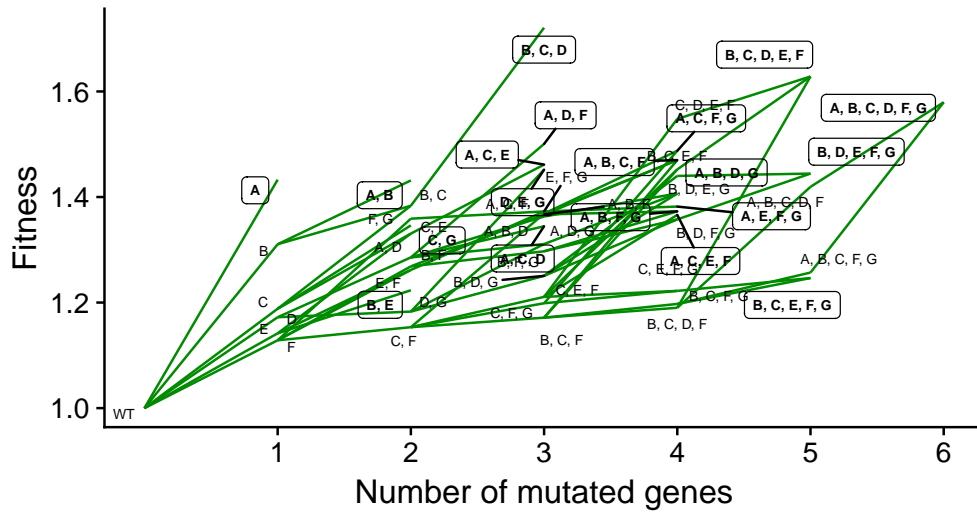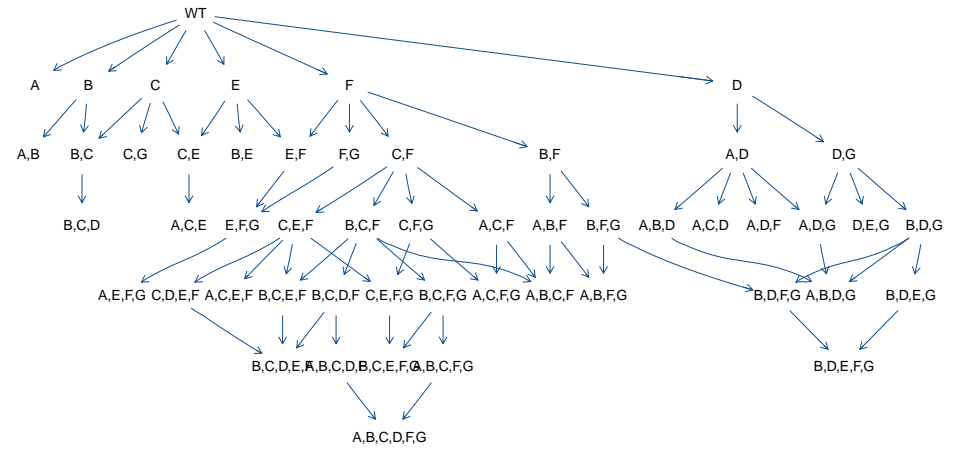

ID M19kX109AWS4IET93  
 acc genotypes 21  
 peaks no back 10  
 removed edges NA  
 prop rem edges NA

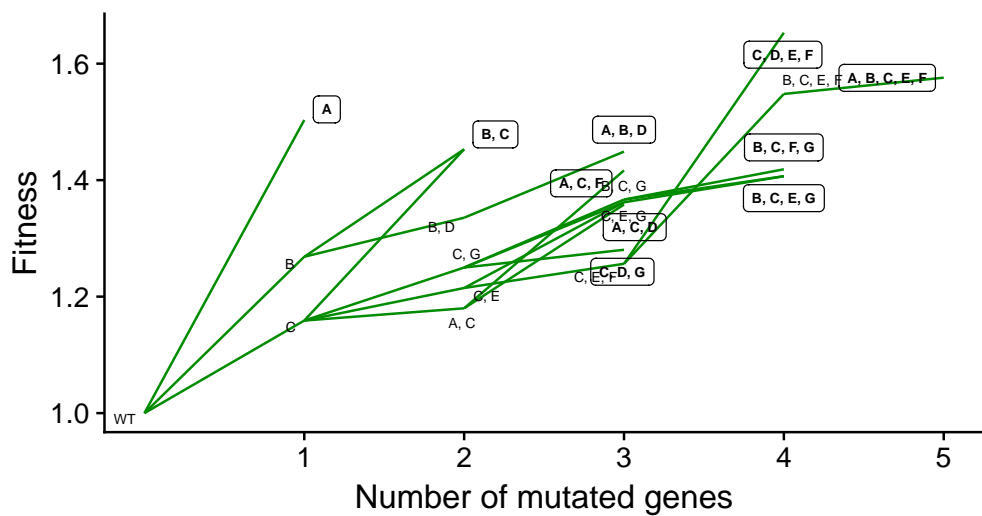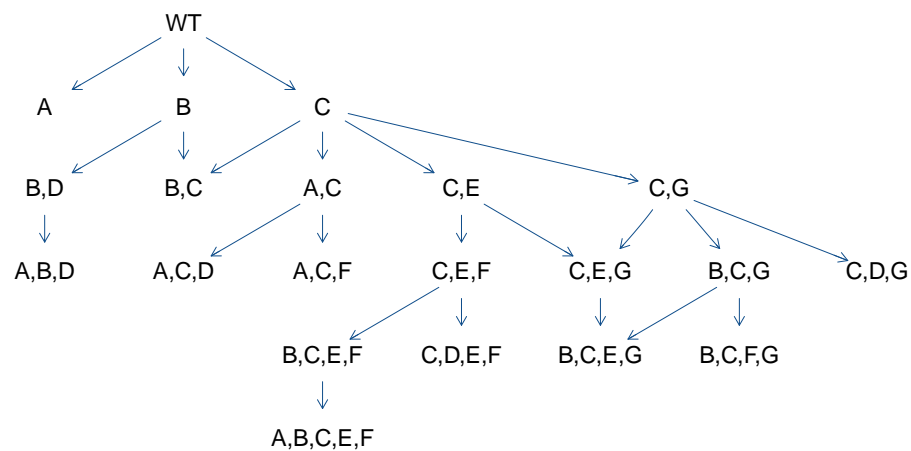

ID mBMwivnTLA1F1fOQ  
 acc genotypes 26  
 peaks no back 11  
 removed edges NA  
 prop rem edges NA

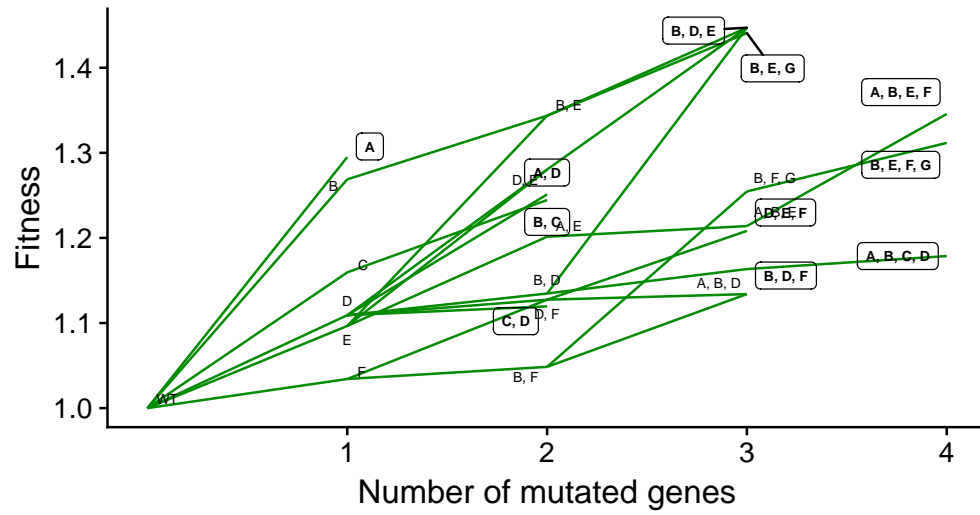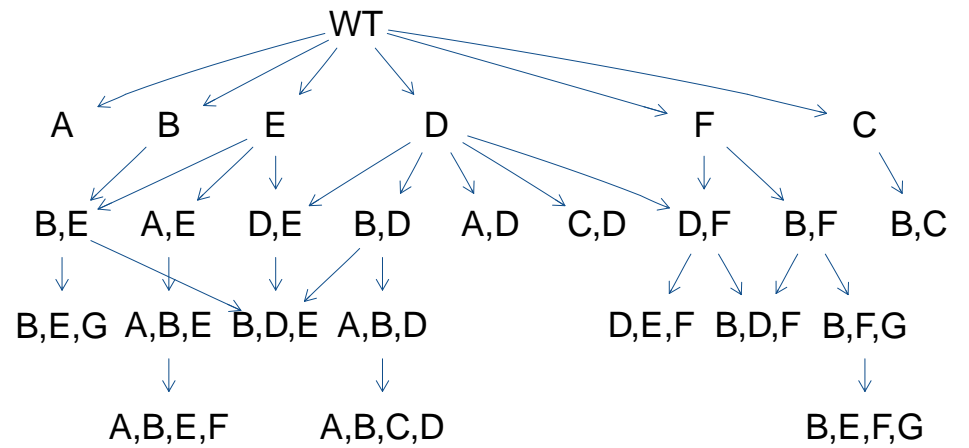



ID MPJBgvRZO1Xp4SQ  
 acc genotypes 53  
 peaks no back 19  
 removed edges NA  
 prop rem edges NA

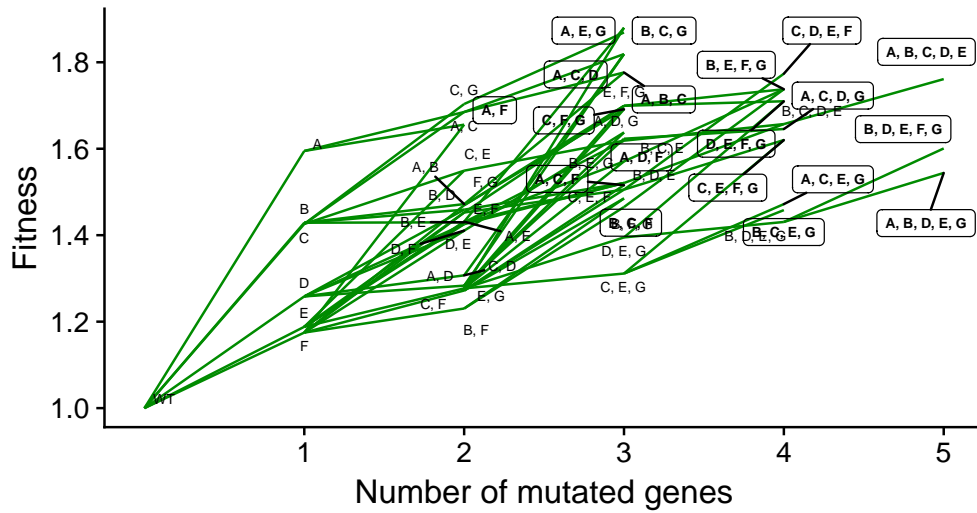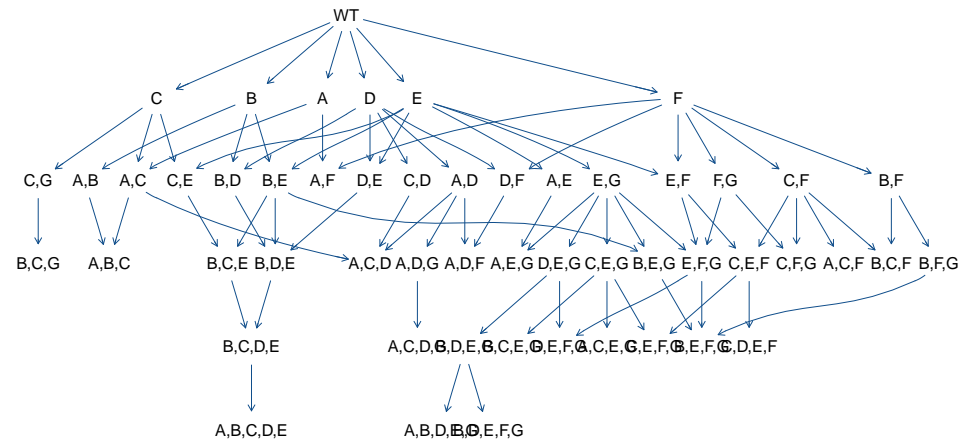

ID Mq3VEO6q8h6j5Q2K  
 acc genotypes 43  
 peaks no back 17  
 removed edges NA  
 prop rem edges NA

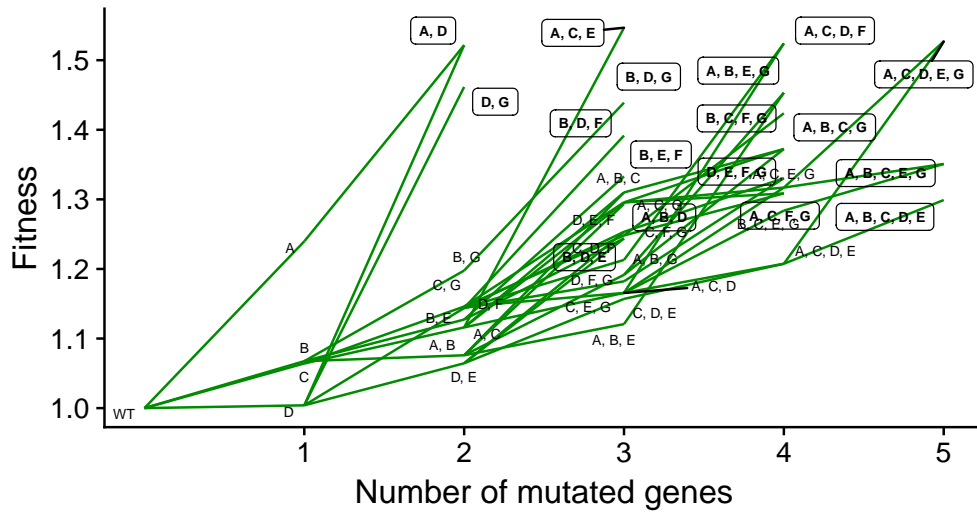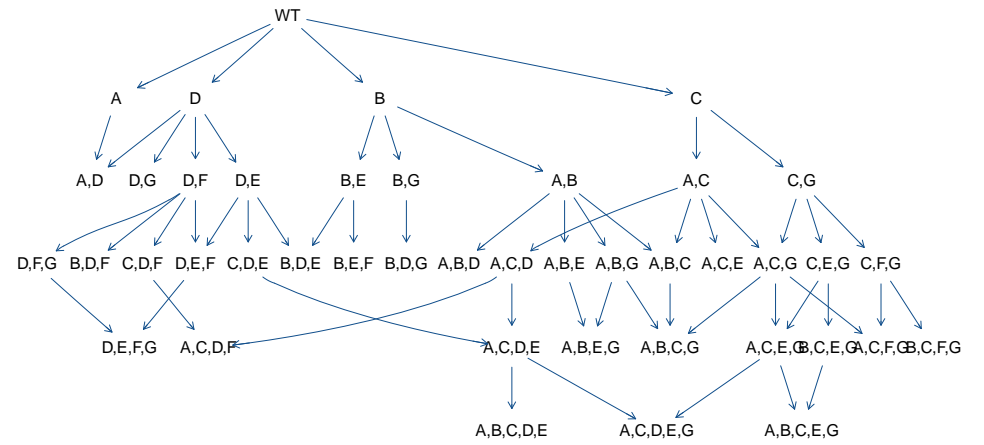

*ID* [mrmstEuzwuKXnli](#)  
*acc genotypes* 64  
*peaks no back* 18  
*removed edges* NA  
*prop rem edges* NA

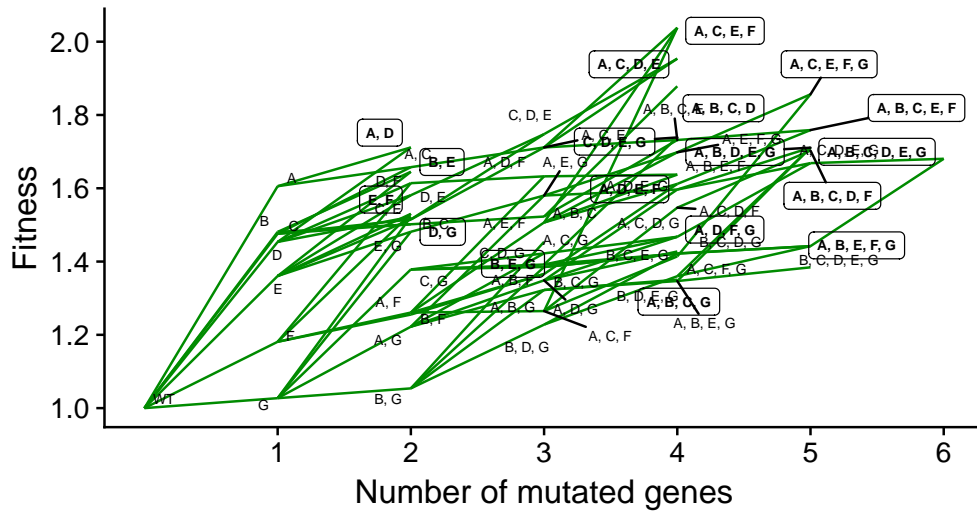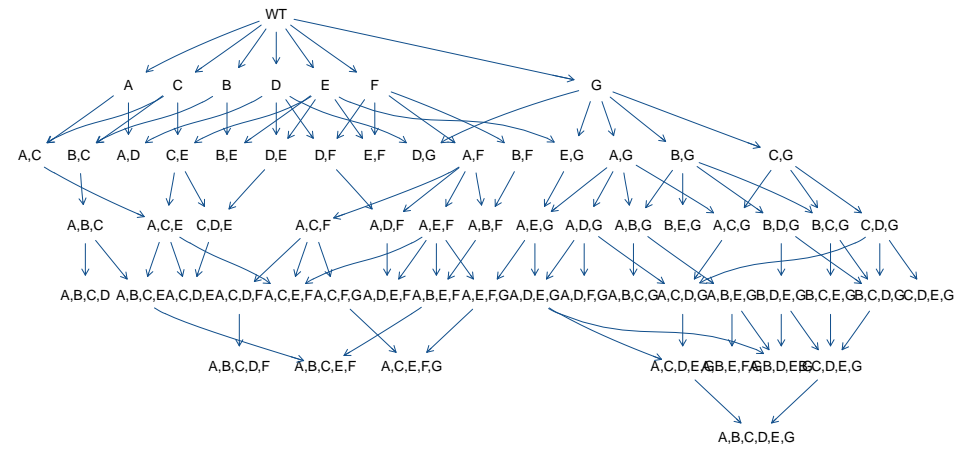

ID mTWr1XzBqvHzZVjW  
 acc genotypes 63  
 peaks no back 22  
 removed edges NA  
 prop rem edges NA

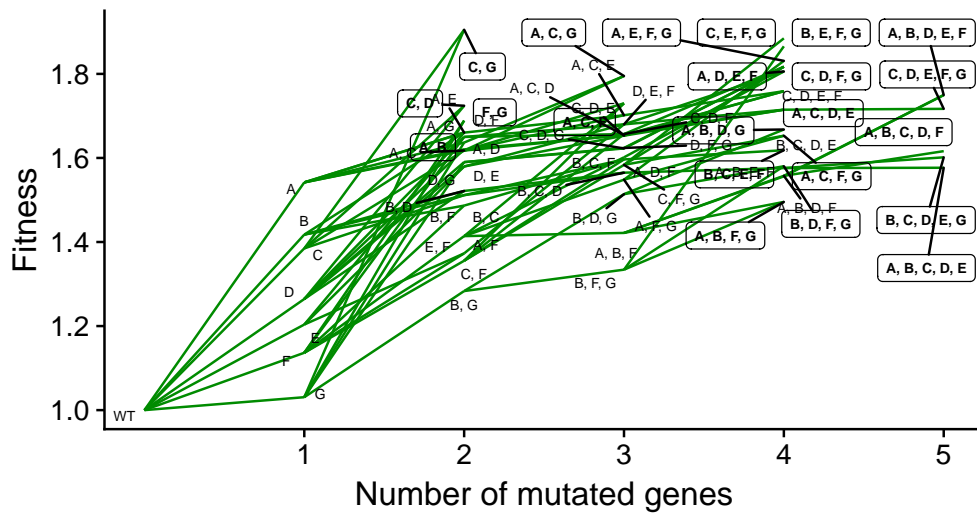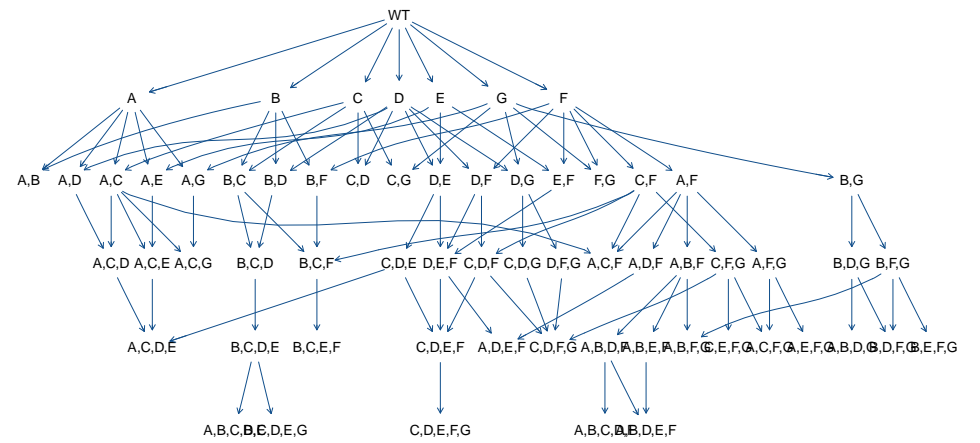

ID mwHTaW8c10WKVxeLt  
 acc genotypes 71  
 peaks no back 22  
 removed edges NA  
 prop rem edges NA

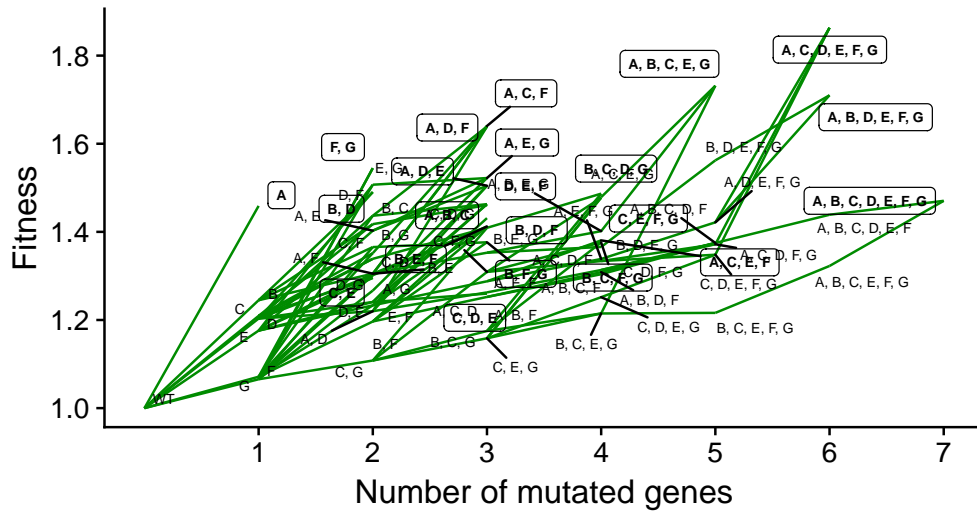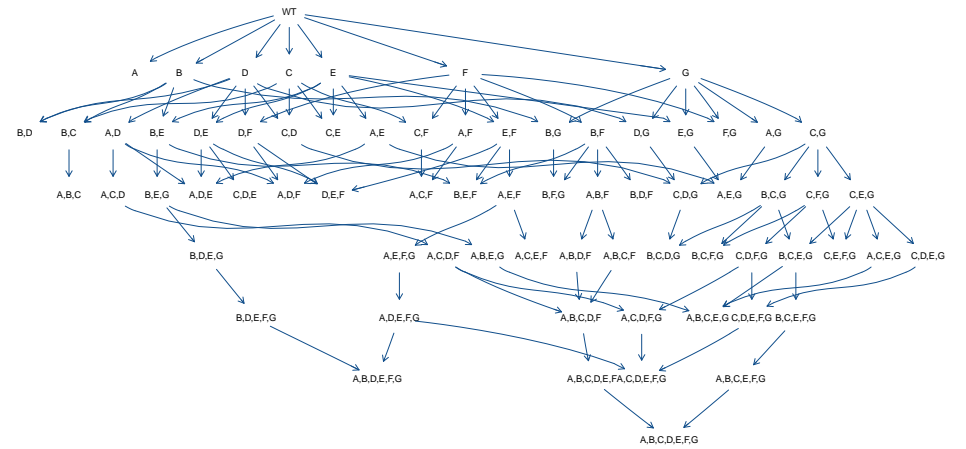

ID n2WFR10n5VPYOSSSt  
 acc genotypes 61  
 peaks no back 17  
 removed edges NA  
 prop rem edges NA

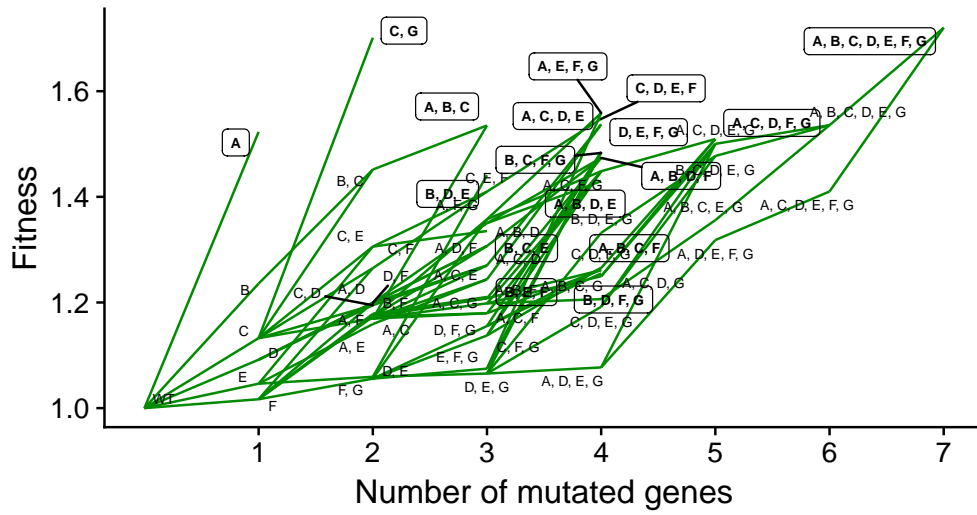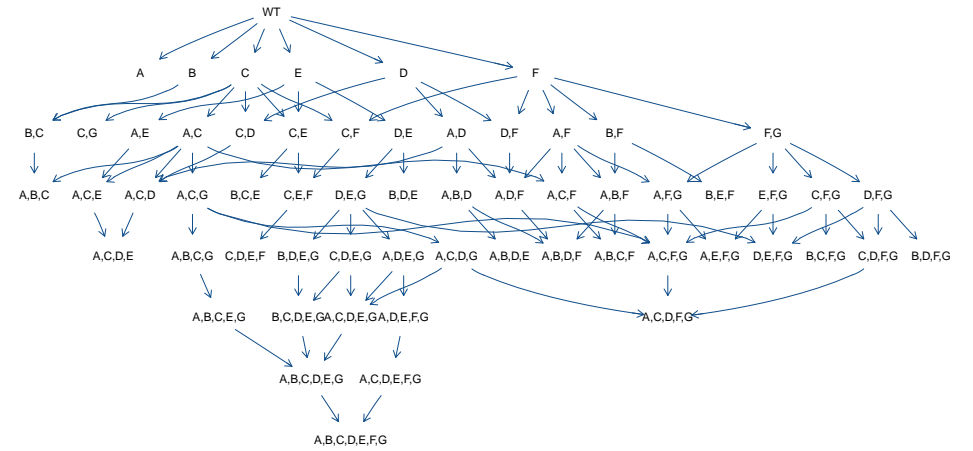

ID [NejgQ4lbqE6syfEk](#)  
 acc genotypes 60  
 peaks no back 22  
 removed edges NA  
 prop rem edges NA

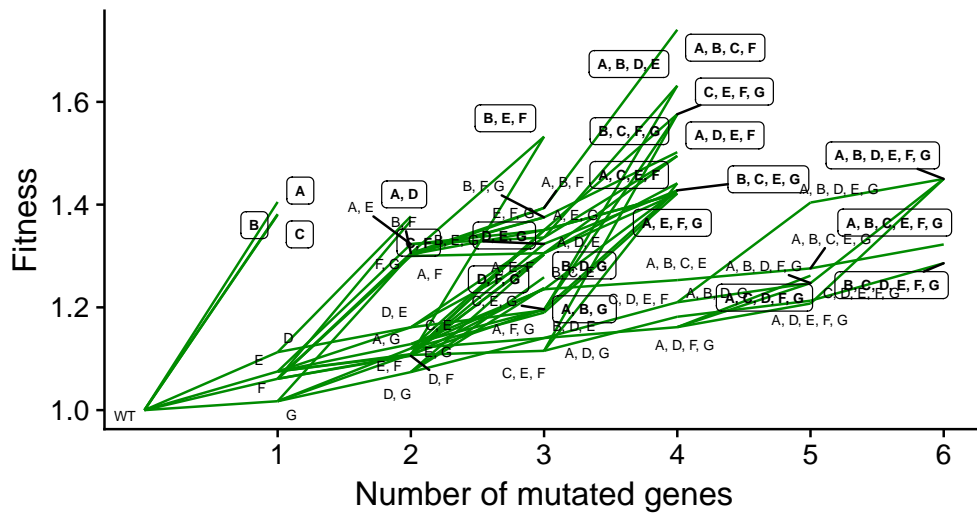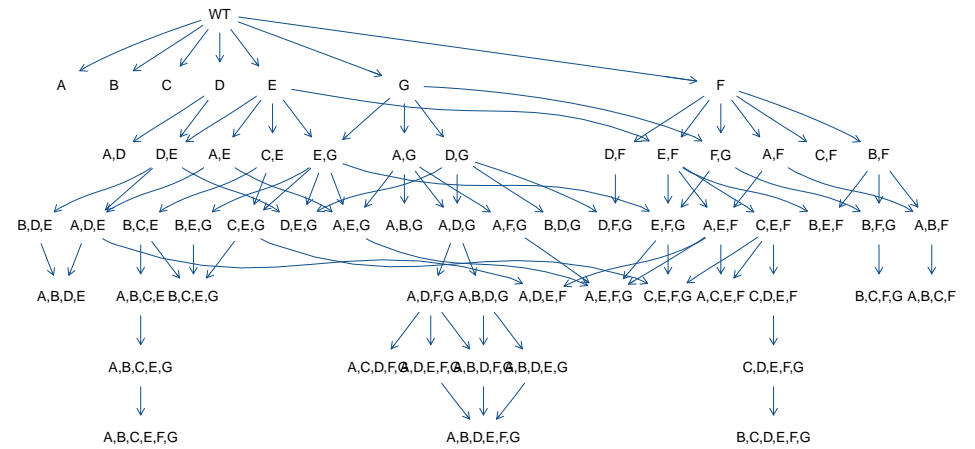

ID **nIKUt9Az1n9o6UtN**  
 acc genotypes **40**  
 peaks no back **17**  
 removed edges **NA**  
 prop rem edges **NA**

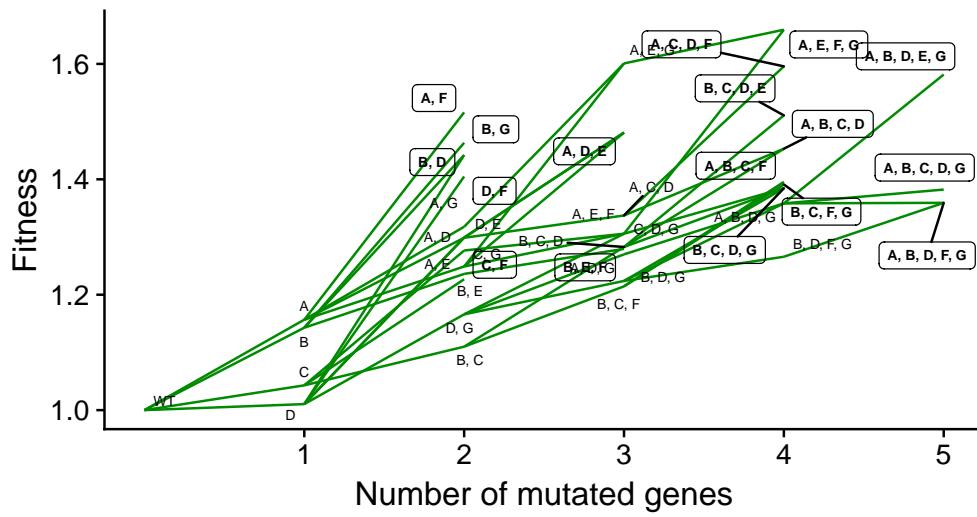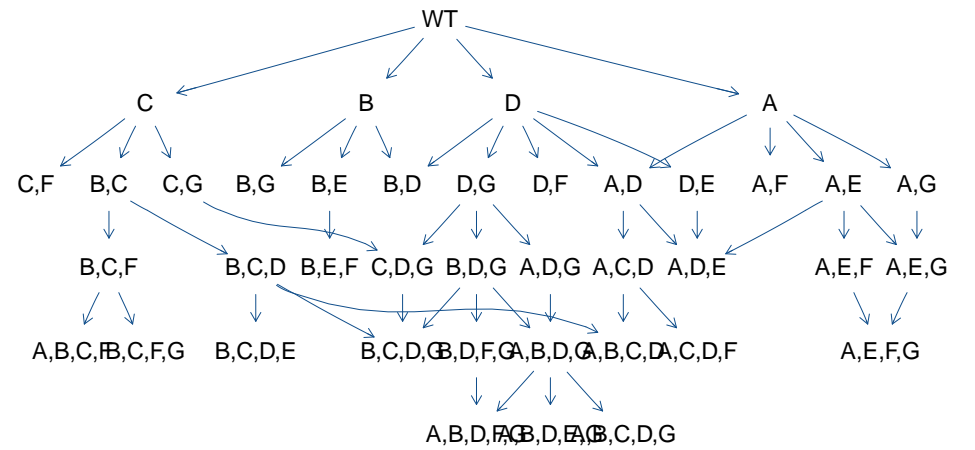





ID nlx10k3xX8bswraYG  
 acc genotypes 19  
 peaks no back 5  
 removed edges NA  
 prop rem edges NA

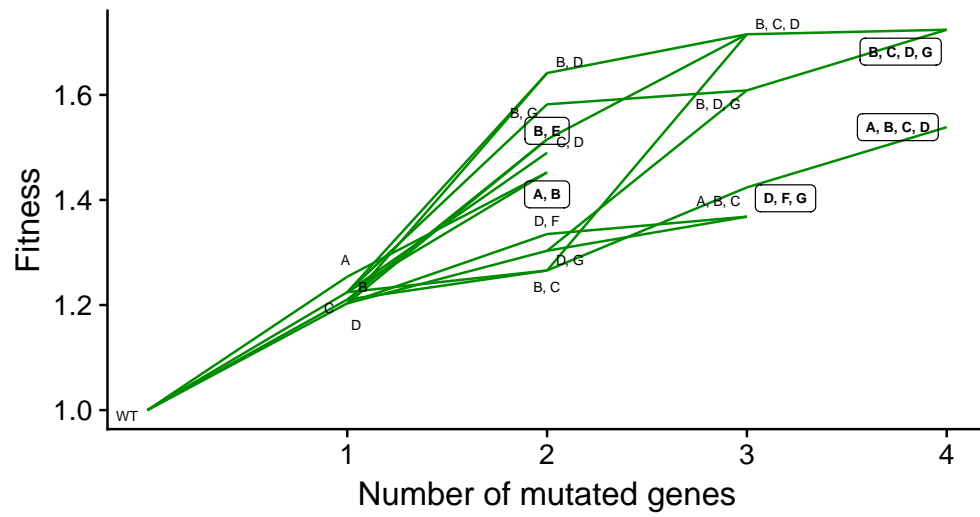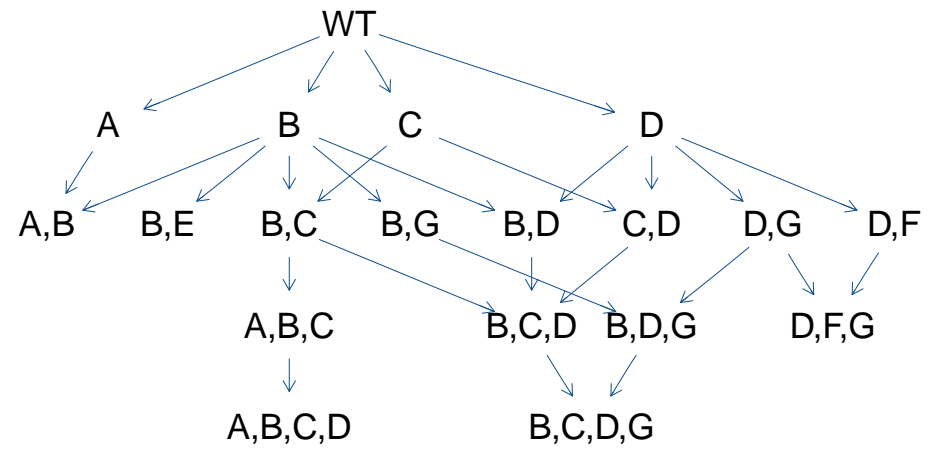

ID Nq9C7m8MciTio614  
 acc genotypes 45  
 peaks no back 13  
 removed edges NA  
 prop rem edges NA

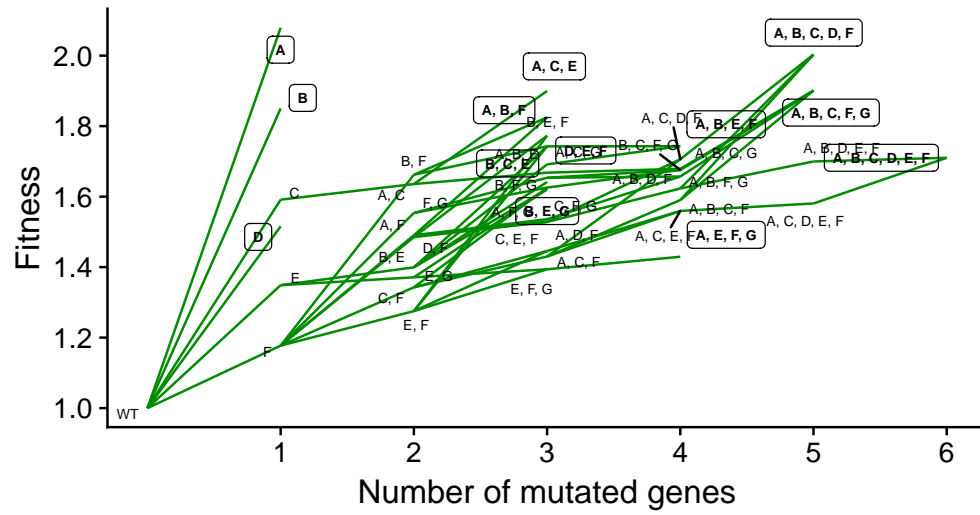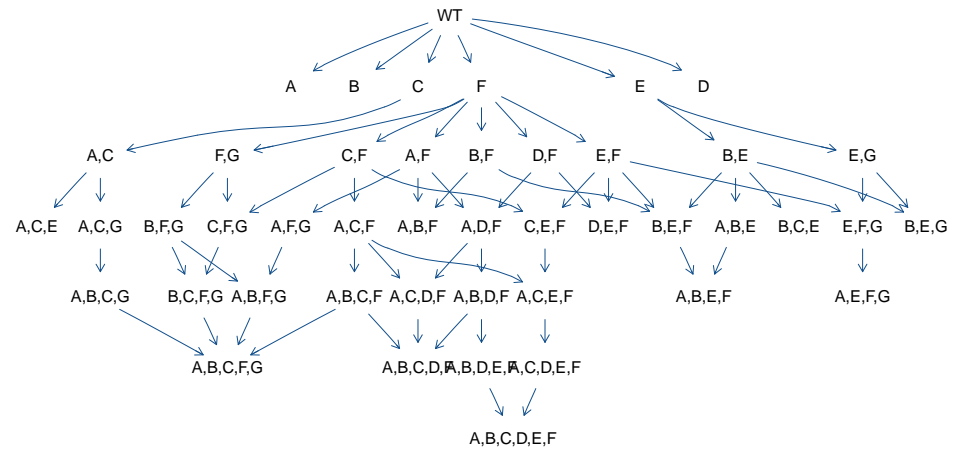

ID NuYHUmW2Daw10xoxW  
acc genotypes 61  
peaks no back 15  
removed edges NA  
prop rem edges NA

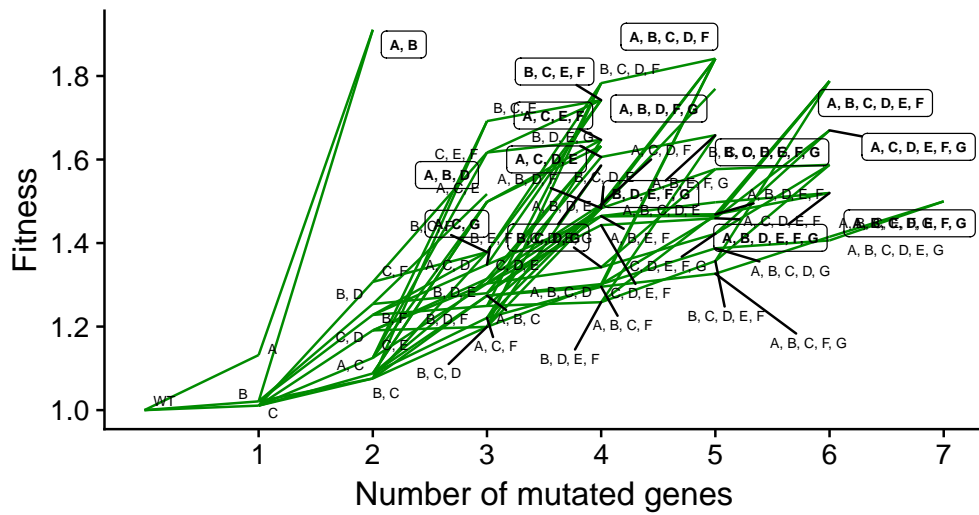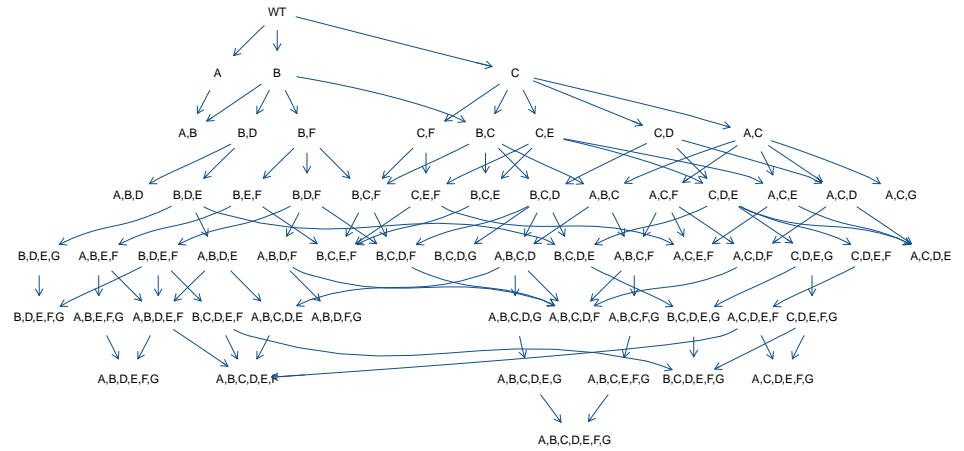

ID [nwLrclgueac4e3RH](#)  
 acc genotypes 57  
 peaks no back 16  
 removed edges NA  
 prop rem edges NA

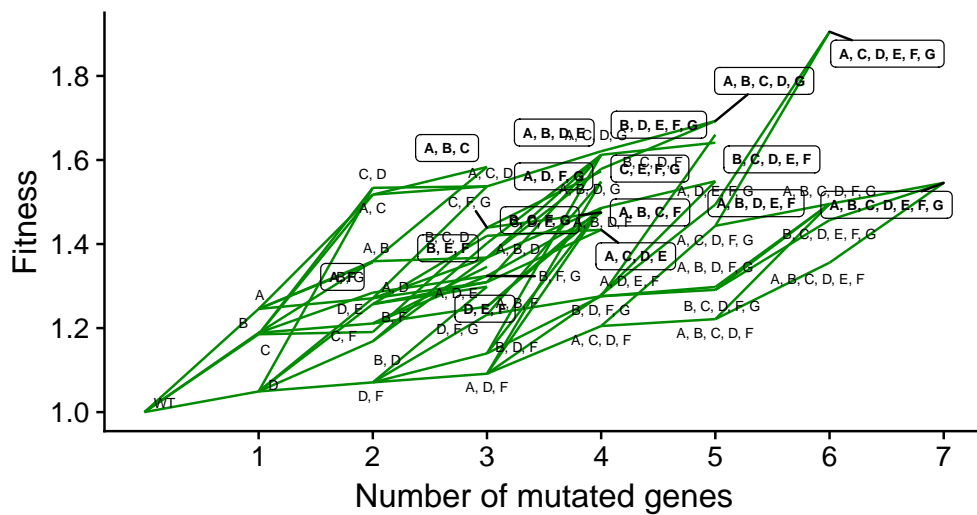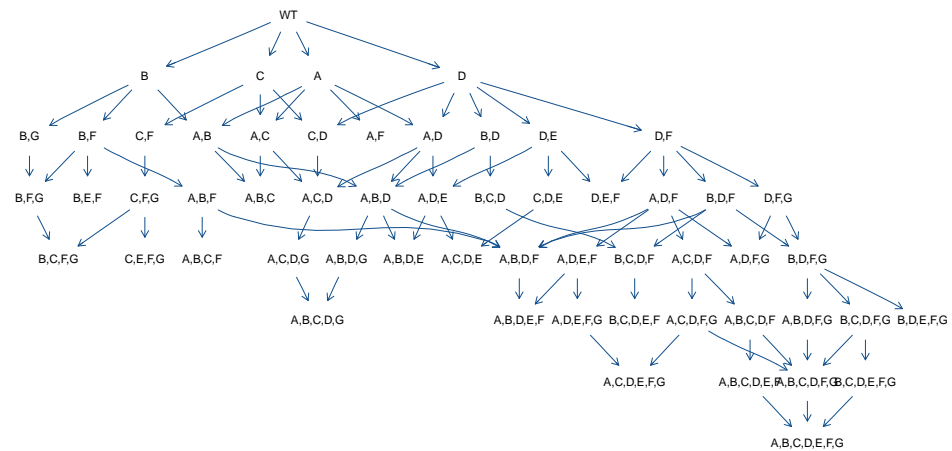

ID [om3Pj5lphjvaQhAk](#)  
 acc genotypes 82  
 peaks no back 27  
 removed edges NA  
 prop rem edges NA

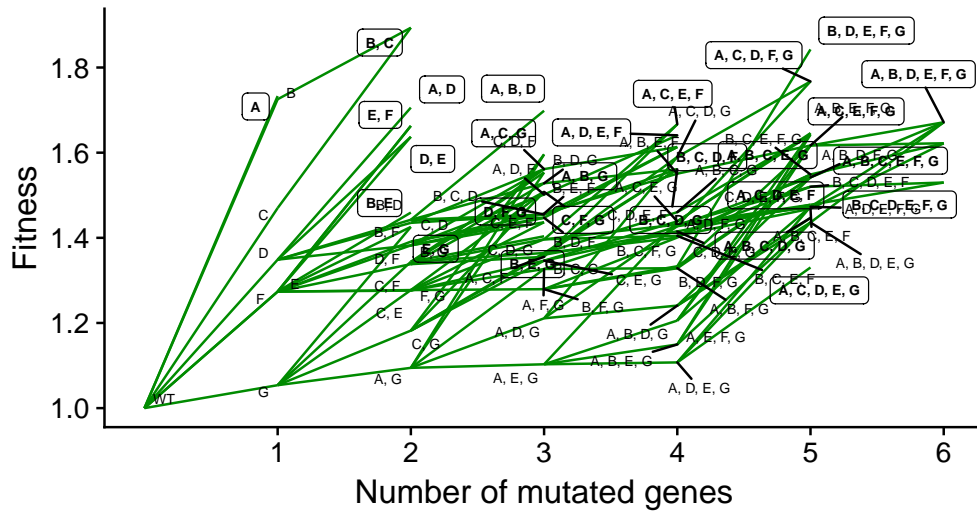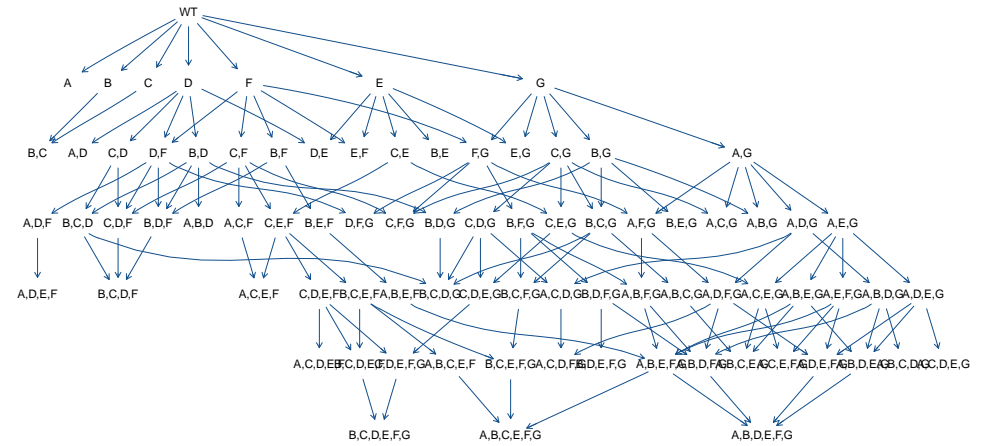

ID OsDpSWcfqKrGoOGX  
 acc genotypes 31  
 peaks no back 10  
 removed edges NA  
 prop rem edges NA

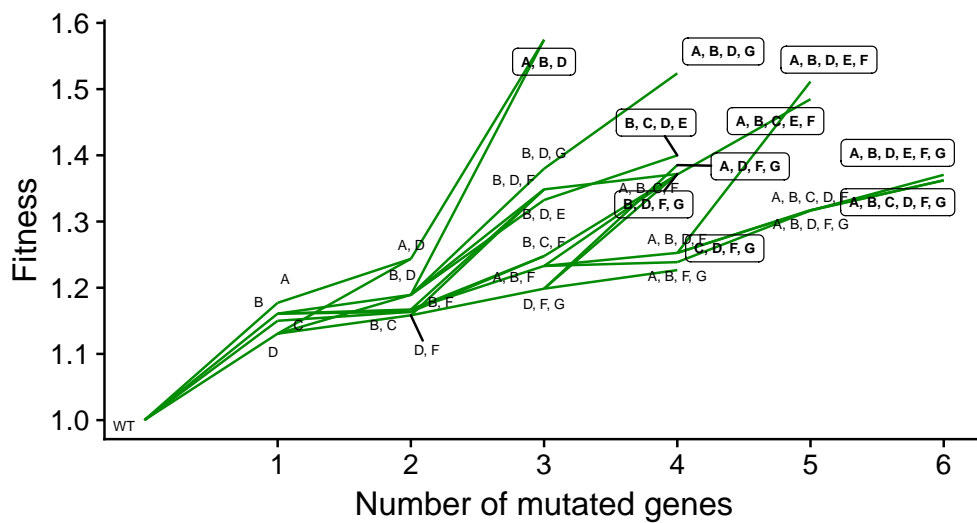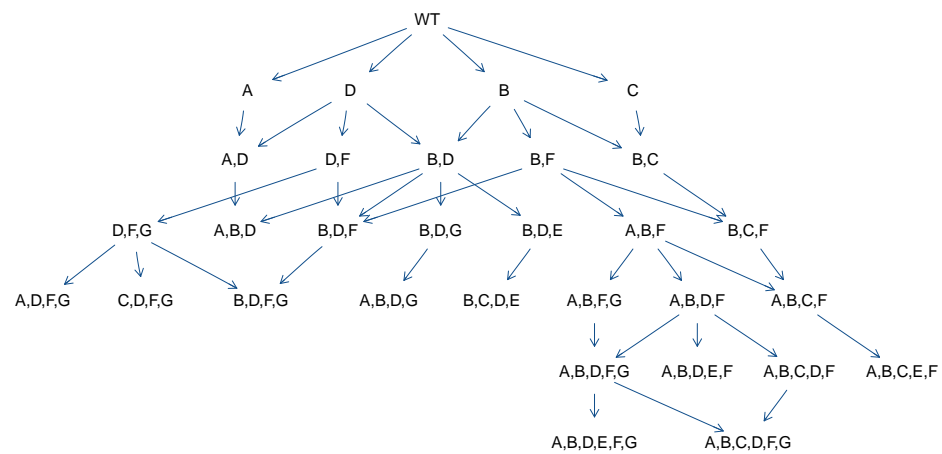

ID **ozA8bz3JzJBjMoZP**  
 acc genotypes **38**  
 peaks no back 11  
 removed edges NA  
 prop rem edges NA

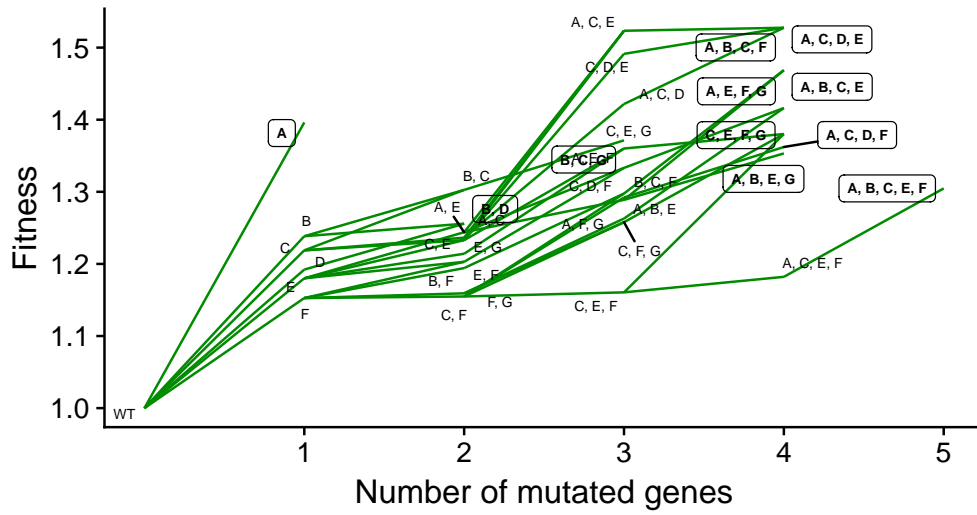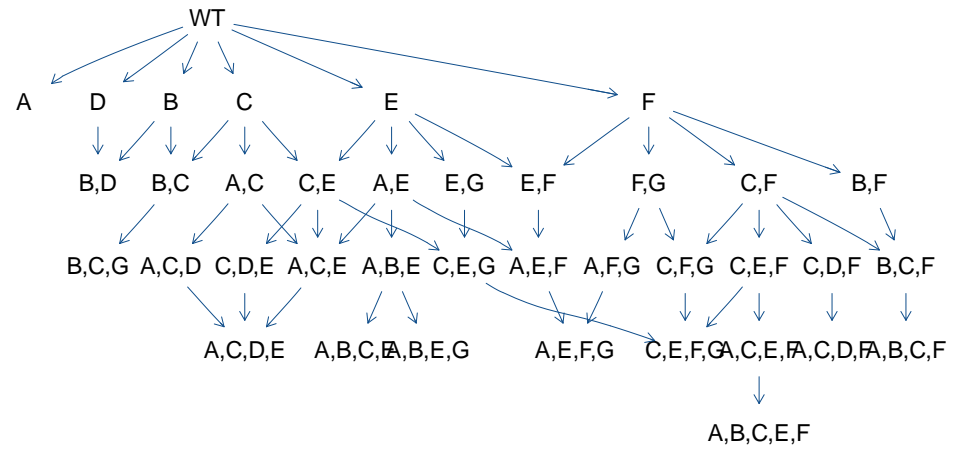



ID p2rZTfzQSZaEzk7D  
 acc genotypes 42  
 peaks no back 11  
 removed edges NA  
 prop rem edges NA

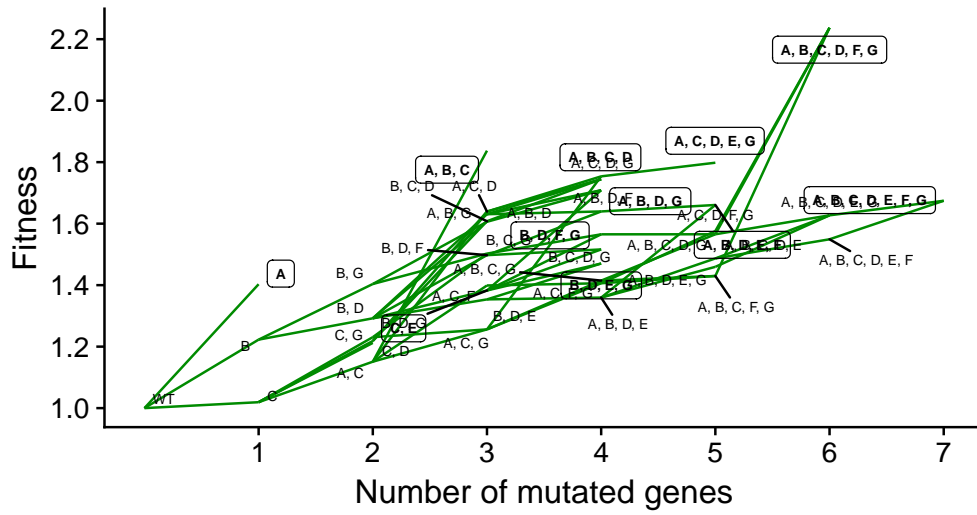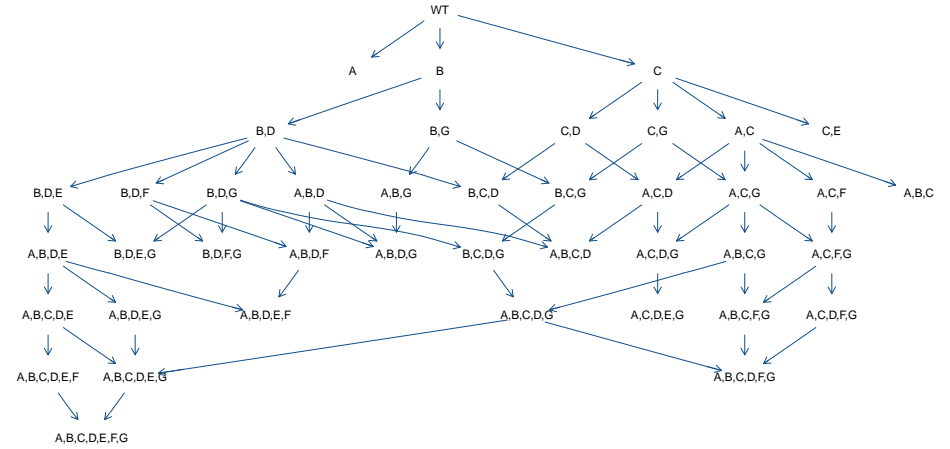

ID PdBS51bgDdPXdV8W  
acc genotypes 33  
peaks no back 10  
removed edges NA  
prop rem edges NA

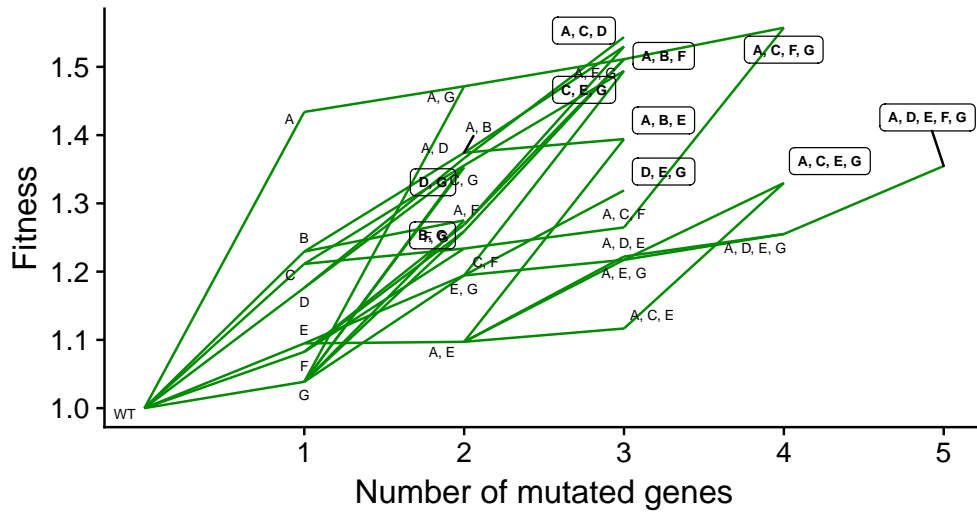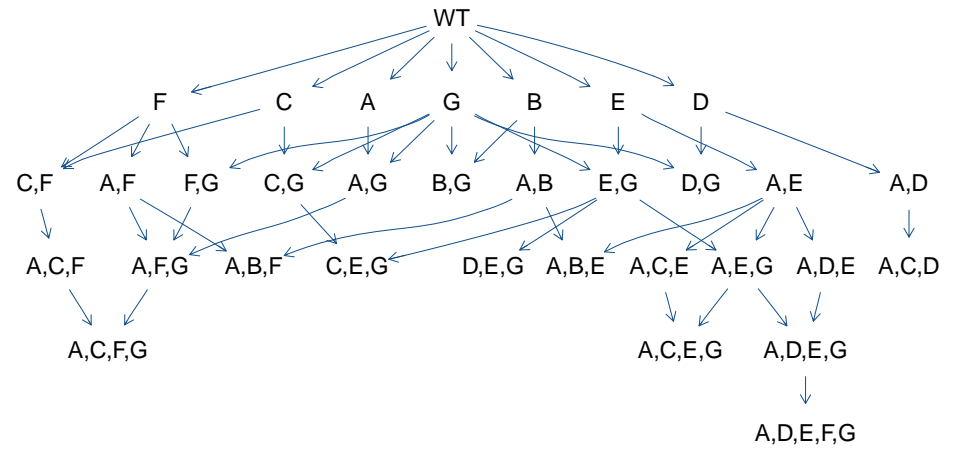

ID PdEpnOBgly104Dp4A  
 acc genotypes 50  
 peaks no back 16  
 removed edges NA  
 prop rem edges NA

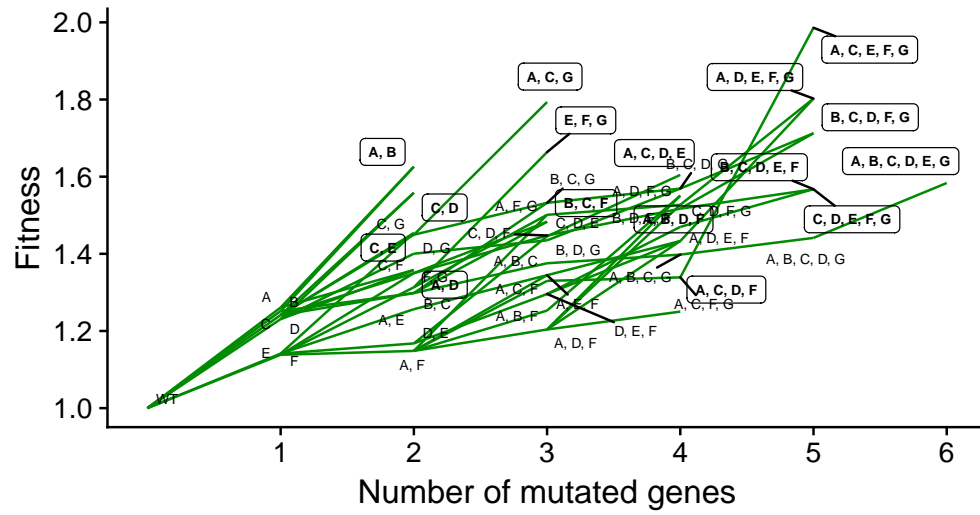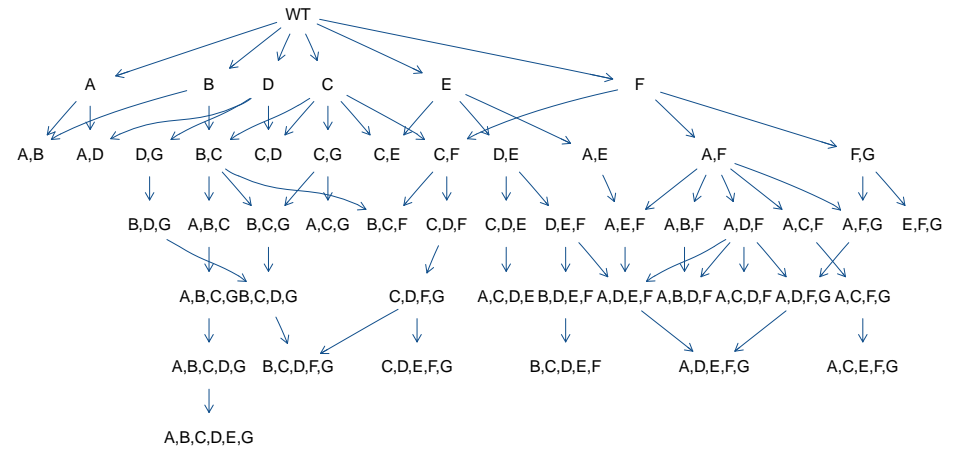

ID pdLy5HbulEcGMFw8  
 acc genotypes 39  
 peaks no back 12  
 removed edges NA  
 prop rem edges NA

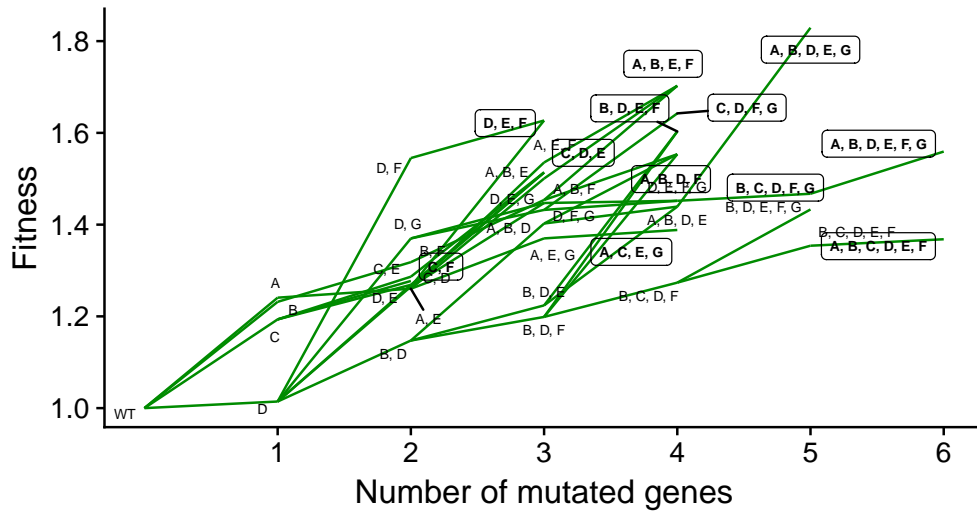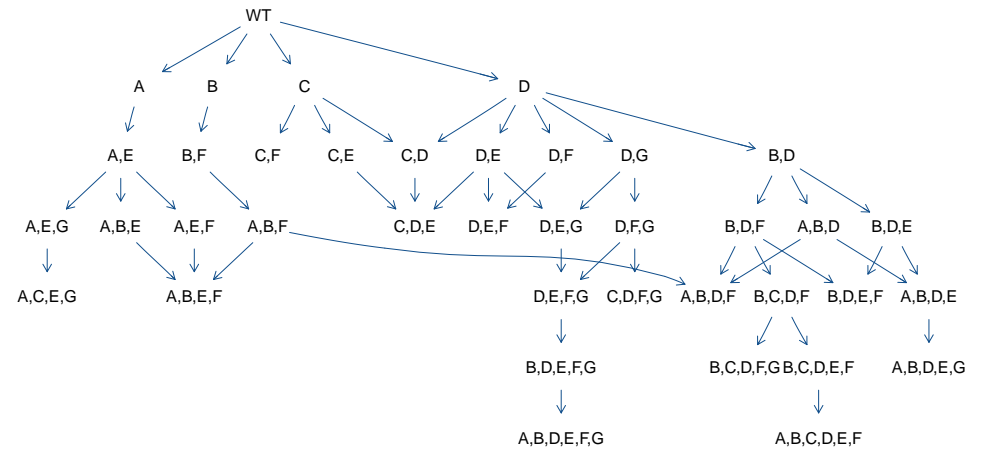

ID PMnxoLN1P10vNrmKW  
 acc genotypes 22  
 peaks no back 8  
 removed edges NA  
 prop rem edges NA

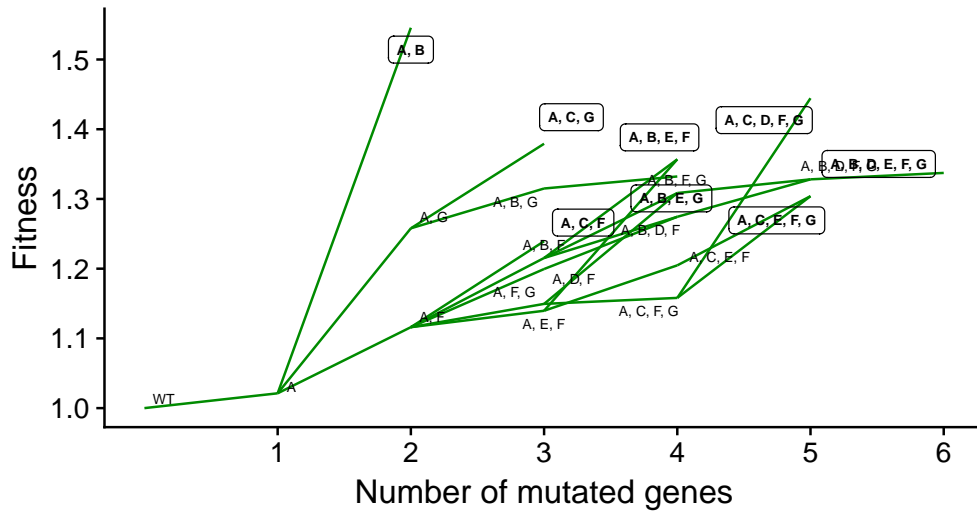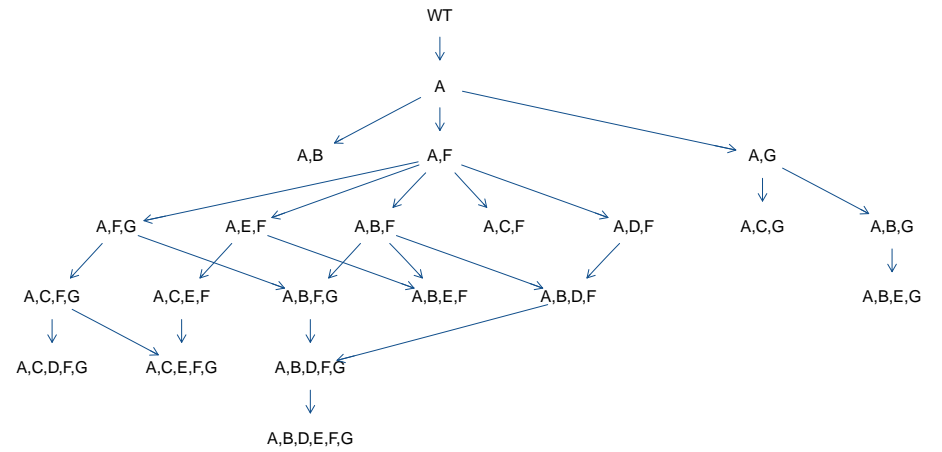

ID [poffFII3VRWbB7qo](#)  
 acc genotypes 49  
 peaks no back 17  
 removed edges NA  
 prop rem edges NA

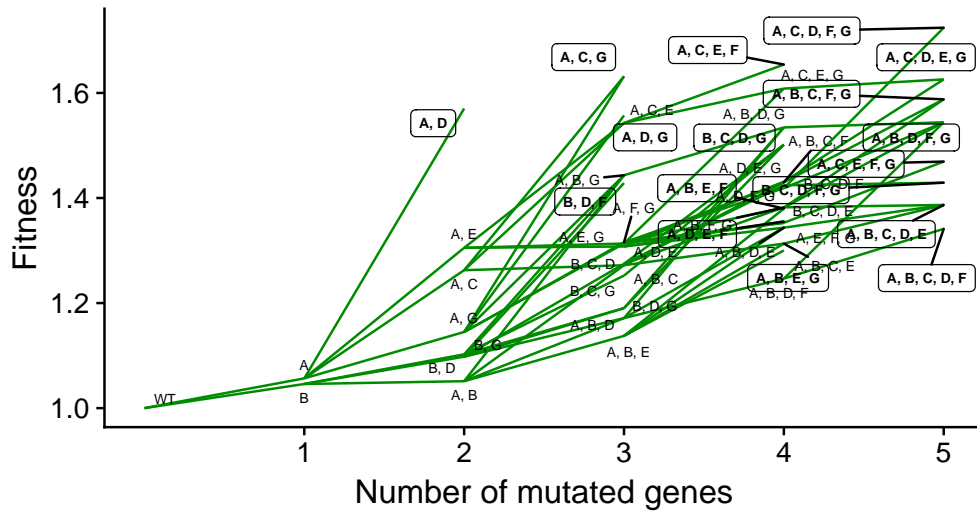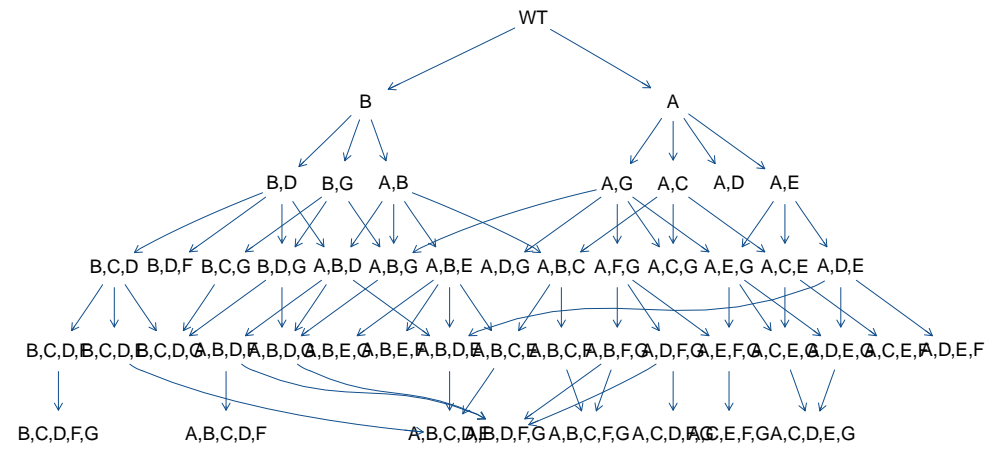



ID QdO42eriCLzJKPT  
 acc genotypes 56  
 peaks no back 22  
 removed edges NA  
 prop rem edges NA

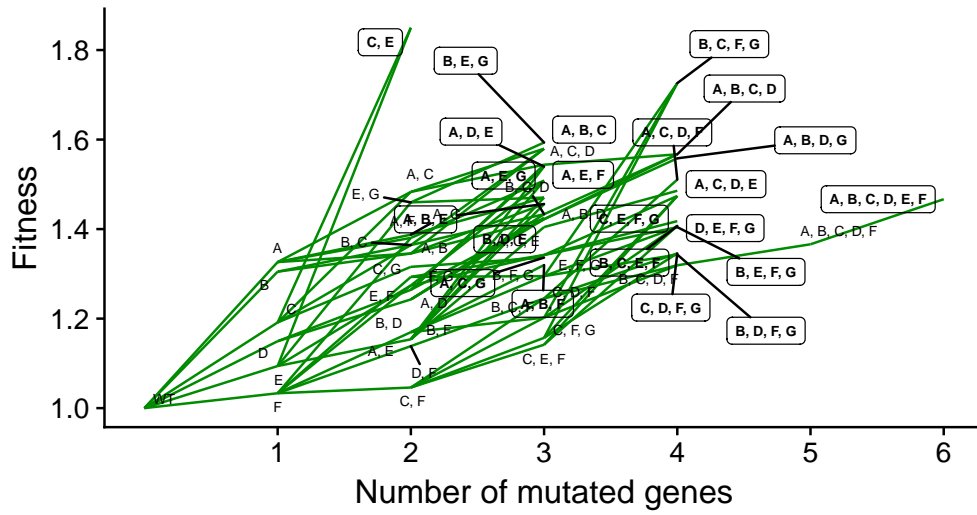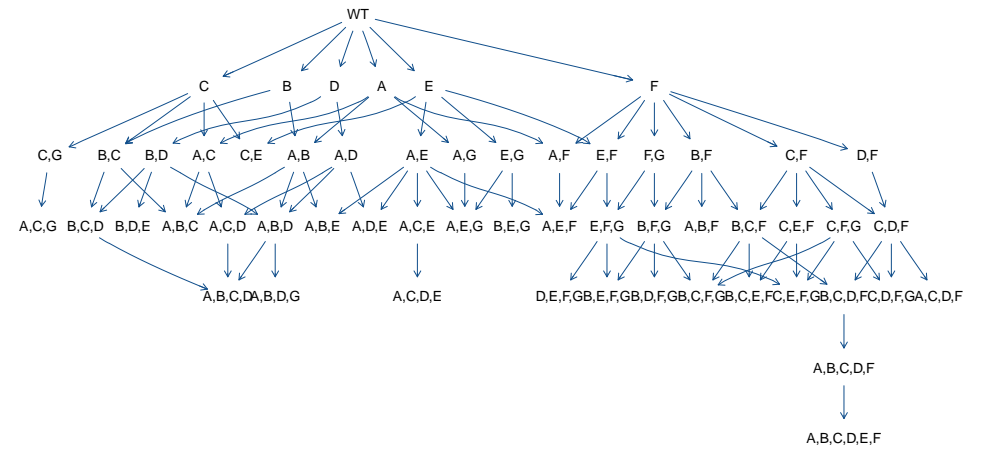



ID QDPtbXAp8i6koPnT  
 acc genotypes 18  
 peaks no back 8  
 removed edges NA  
 prop rem edges NA

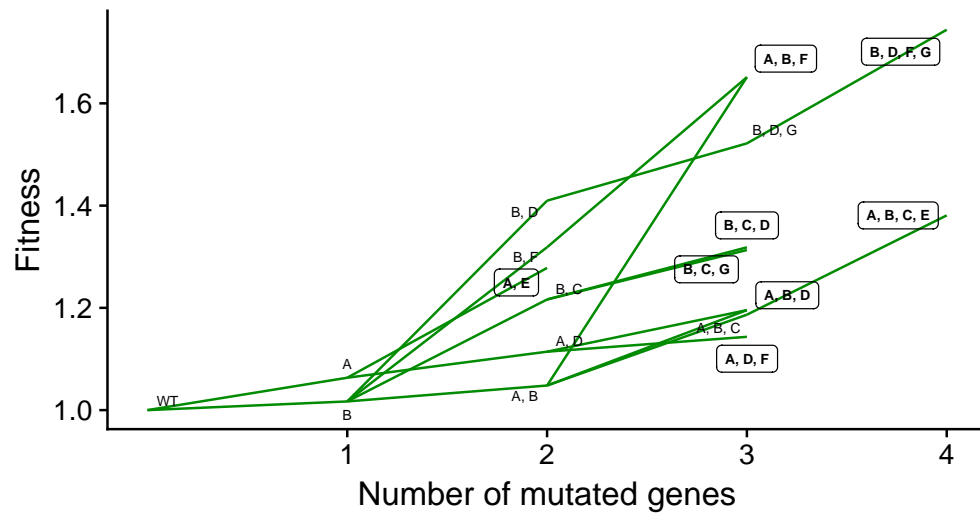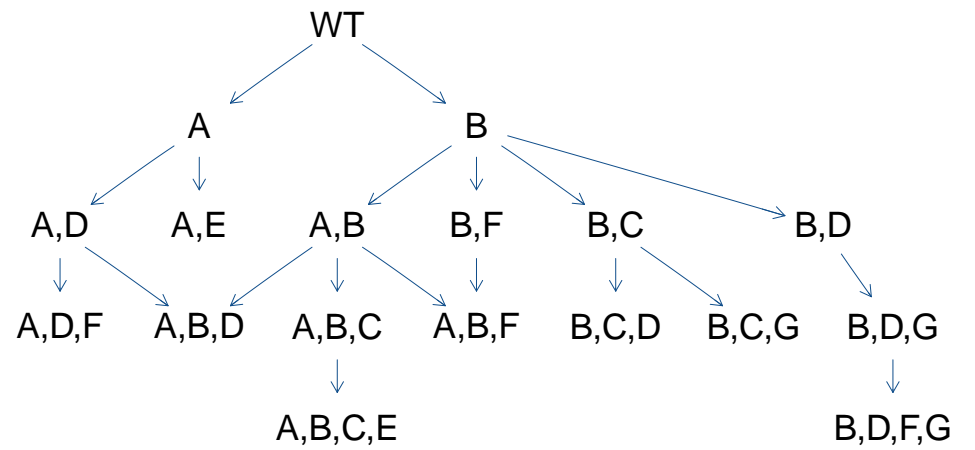

ID QIQaxajtj6kjit1V  
 acc genotypes 27  
 peaks no back 10  
 removed edges NA  
 prop rem edges NA

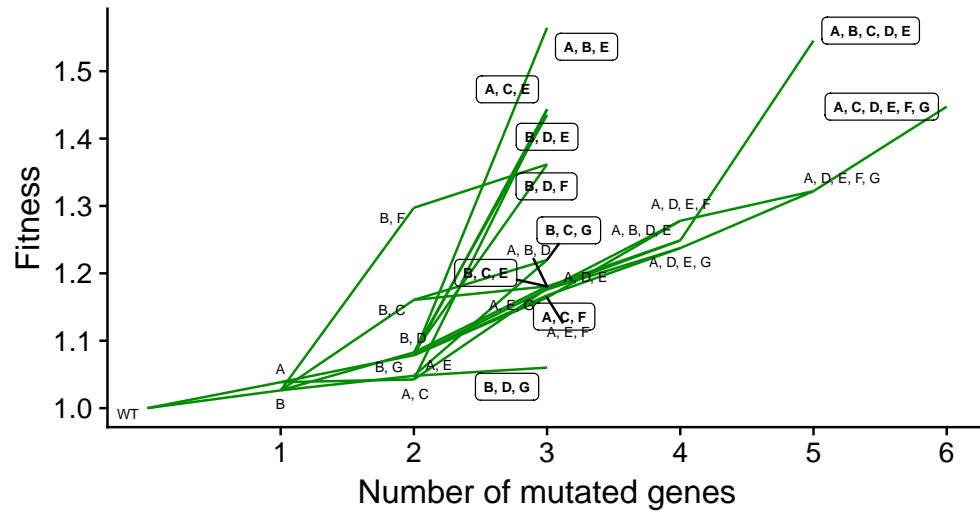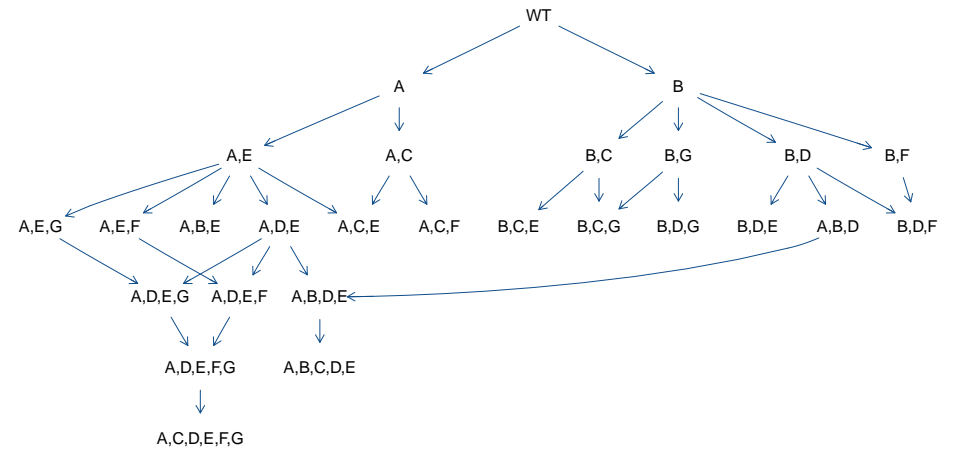

ID QTFRtRudotyAGuqB  
 acc genotypes 55  
 peaks no back 18  
 removed edges NA  
 prop rem edges NA

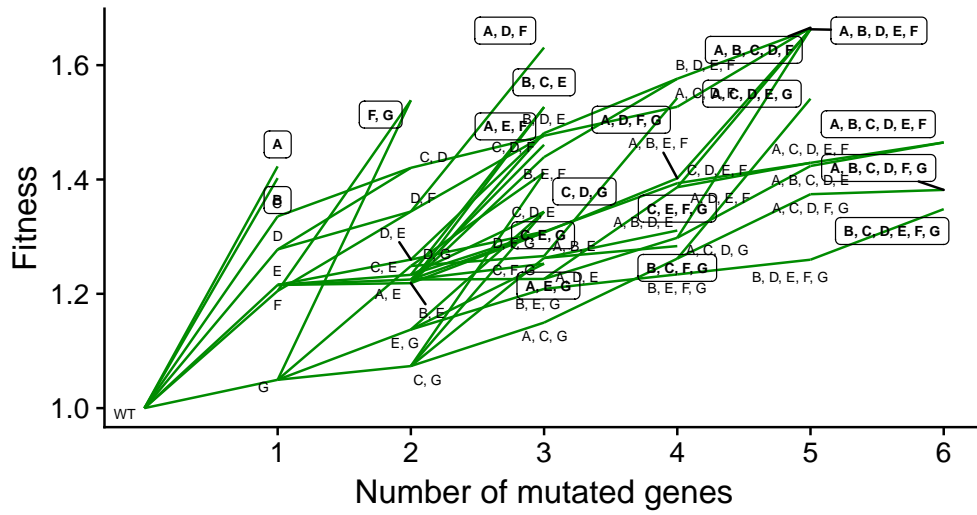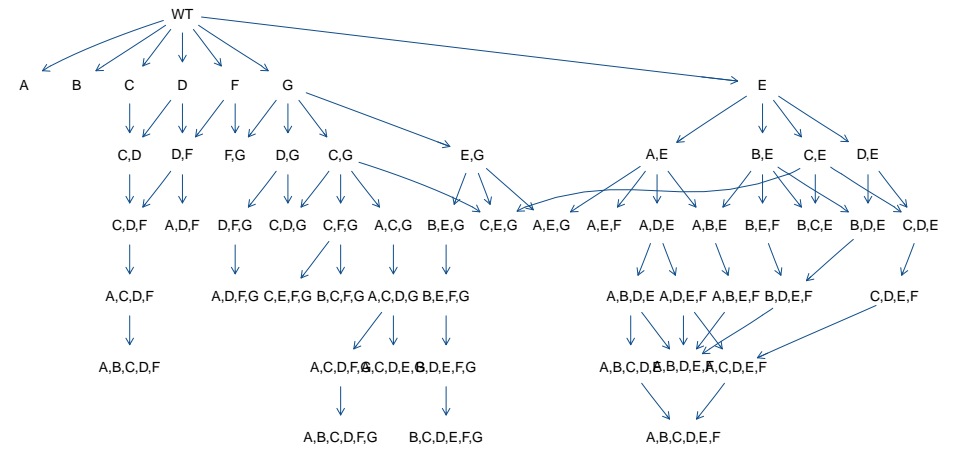

ID qUmaRIOIDCO4dtyu  
 acc genotypes 44  
 peaks no back 17  
 removed edges NA  
 prop rem edges NA

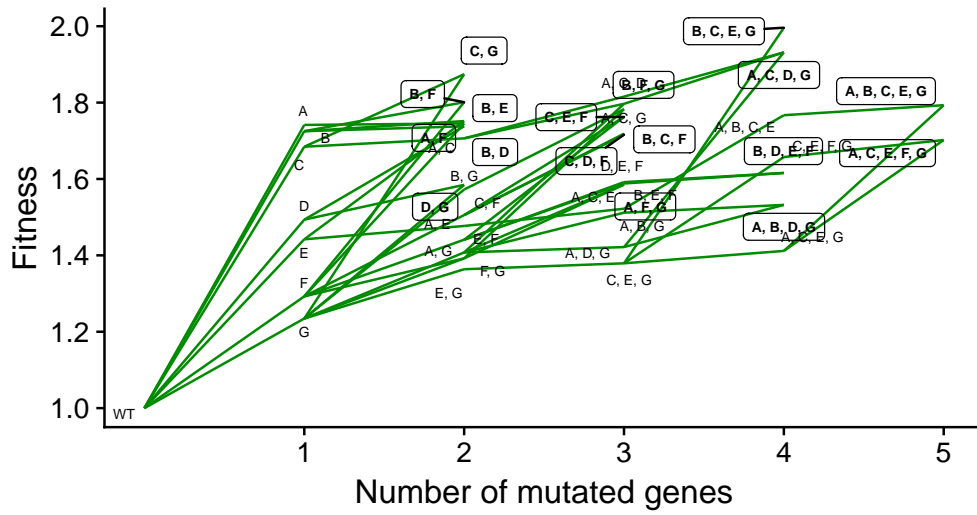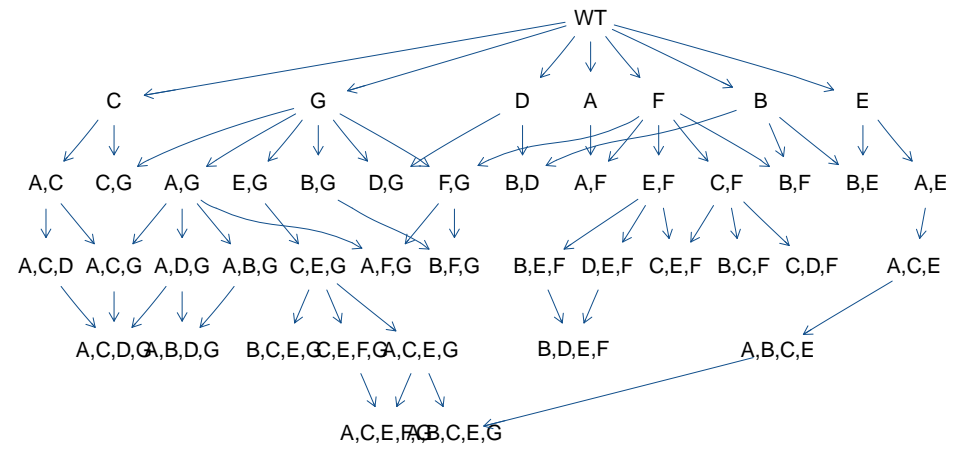

ID [r4JwqMTj8Y3k7yRZ](#)  
 acc genotypes 52  
 peaks no back 15  
 removed edges NA  
 prop rem edges NA

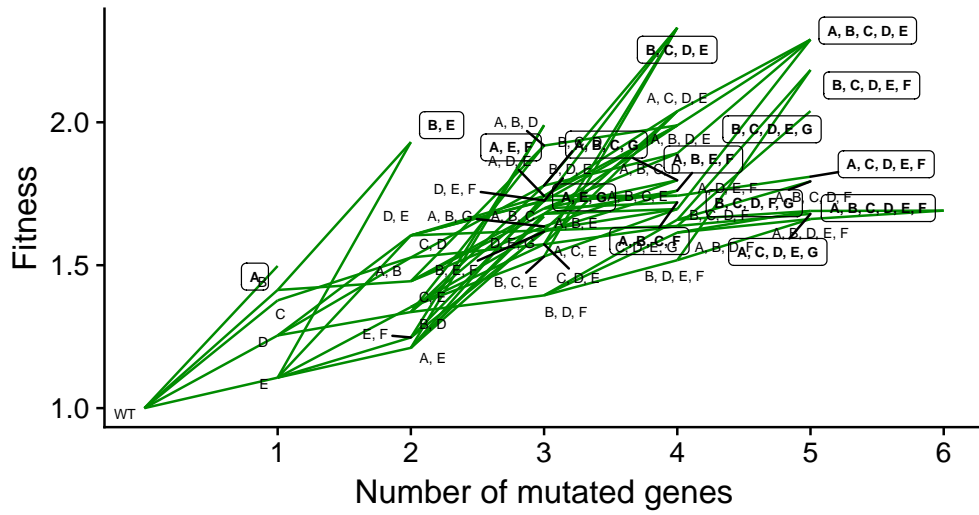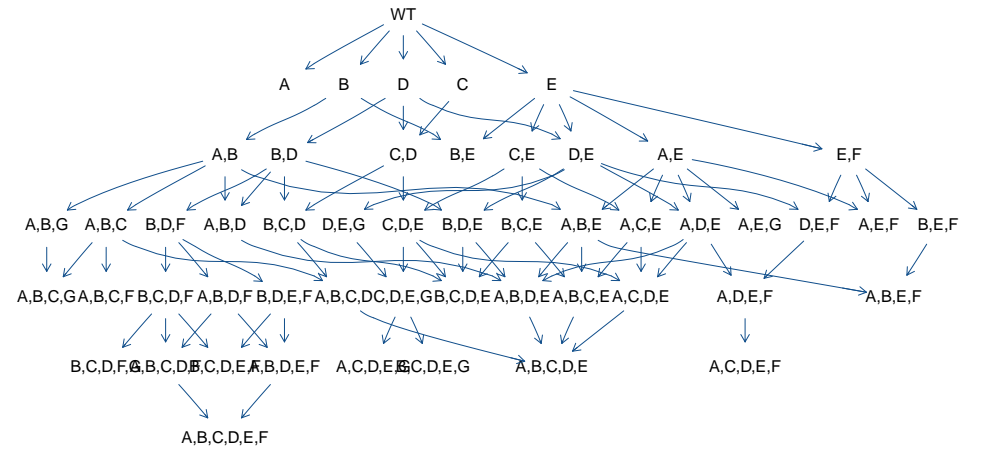

ID **rB10EATzKOO2QwOlv**  
 acc genotypes **23**  
 peaks no back 9  
 removed edges NA  
 prop rem edges NA

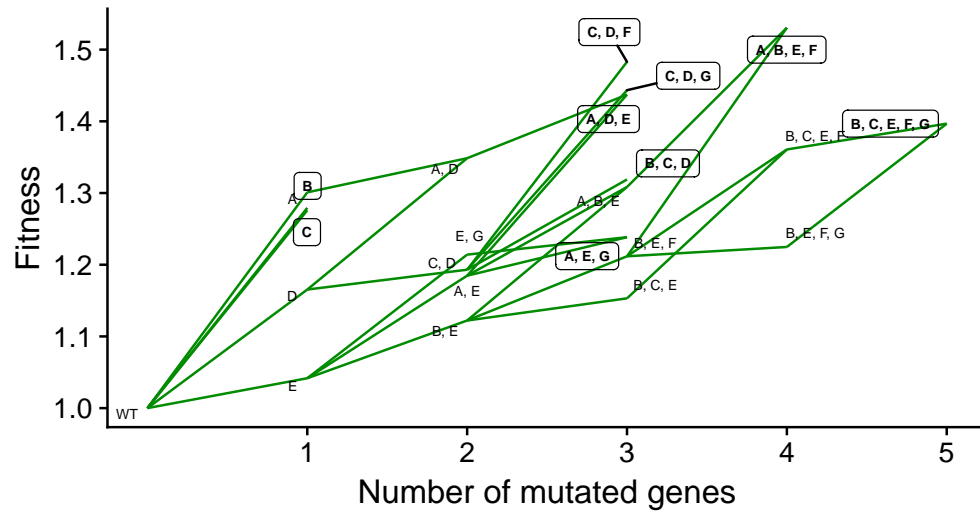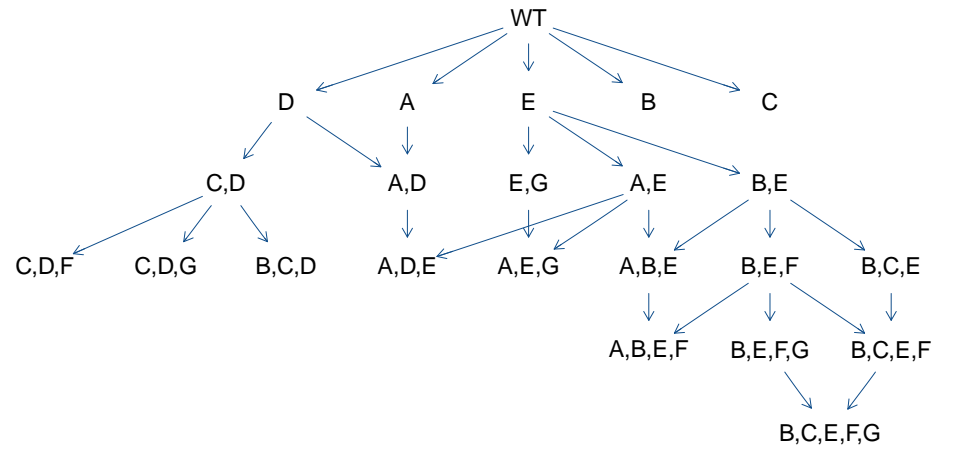

ID rCDeBXmZnNmUHI1  
 acc genotypes 60  
 peaks no back 24  
 removed edges NA  
 prop rem edges NA

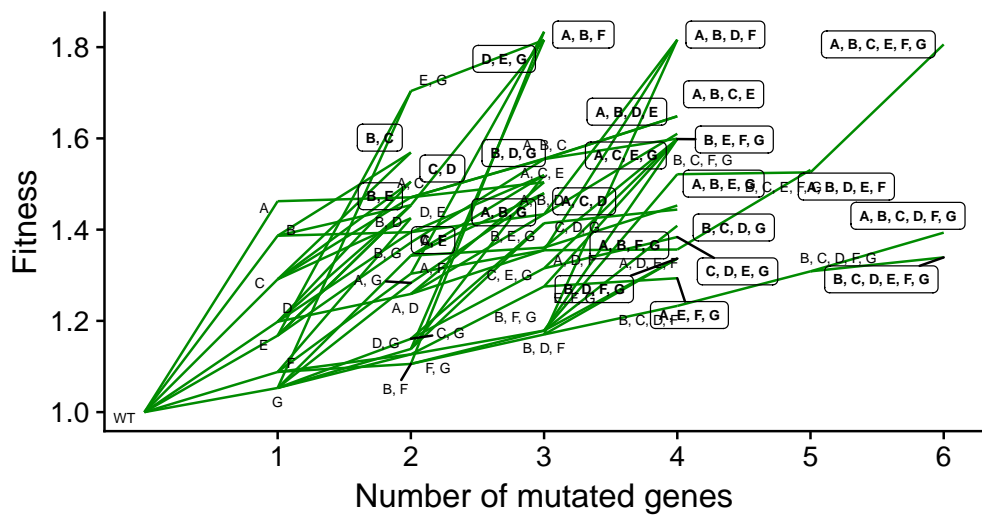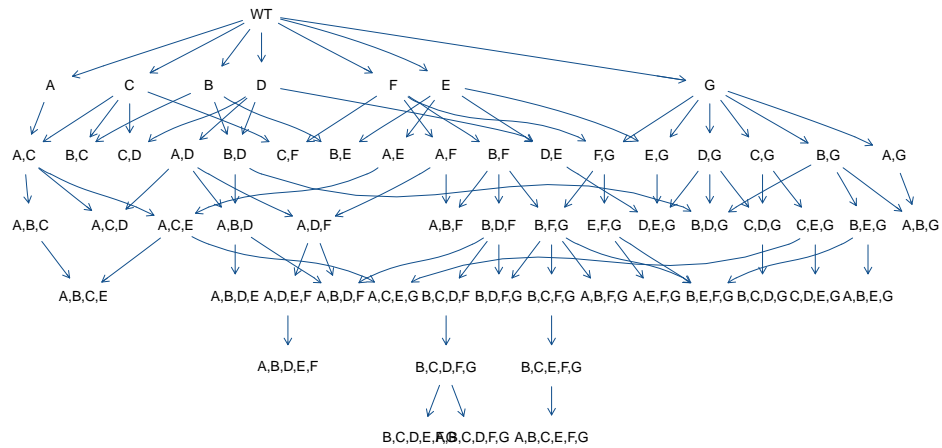

ID ReBiTNyW6Sg6eJwN  
 acc genotypes 75  
 peaks no back 13  
 removed edges NA  
 prop rem edges NA

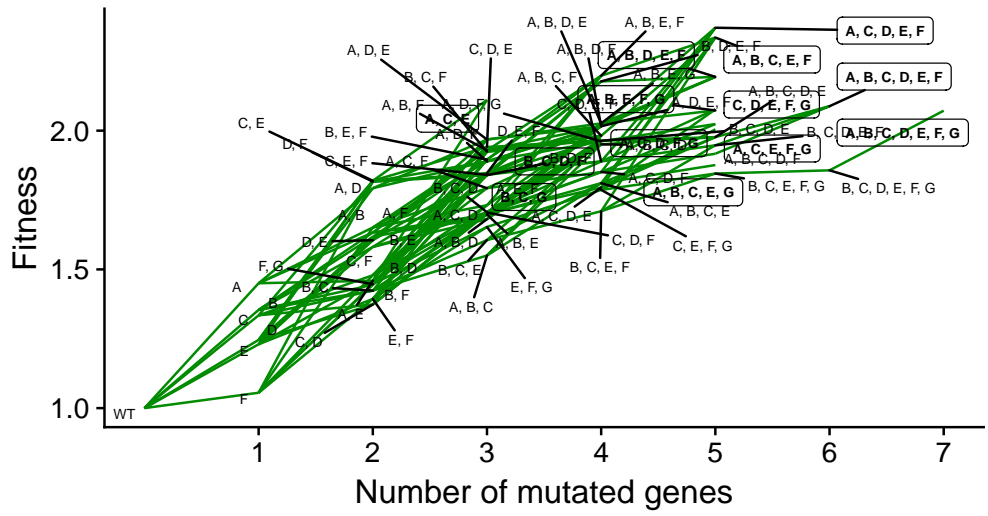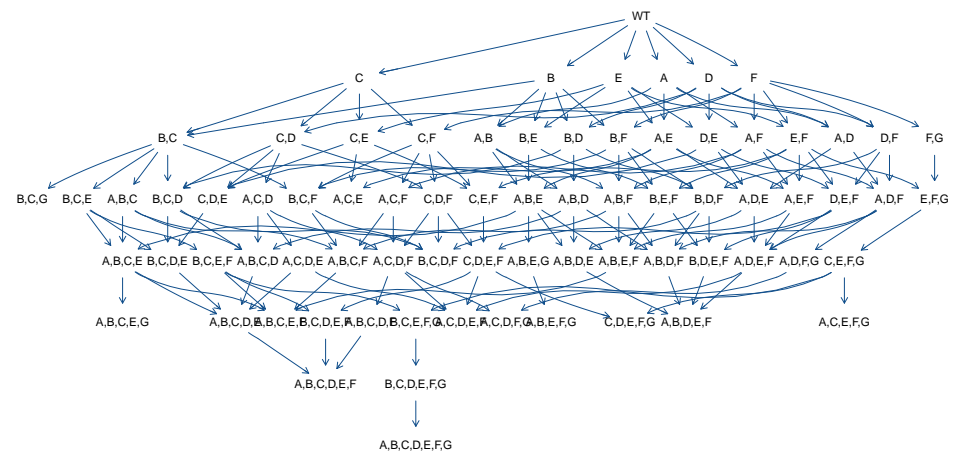



ID **rhc6UcRhym147xh4**  
 acc genotypes **12**  
 peaks no back **6**  
 removed edges **NA**  
 prop rem edges **NA**

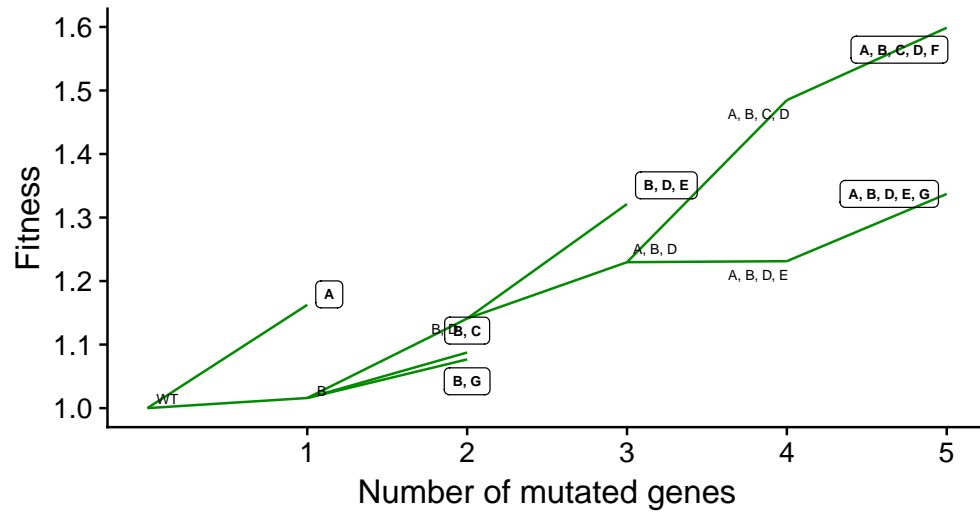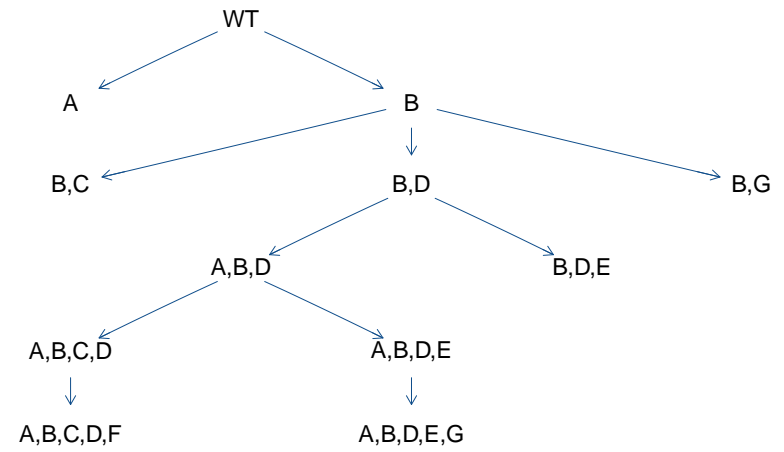

ID RmugDTsuCjx1AI9r  
 acc genotypes 14  
 peaks no back 6  
 removed edges NA  
 prop rem edges NA

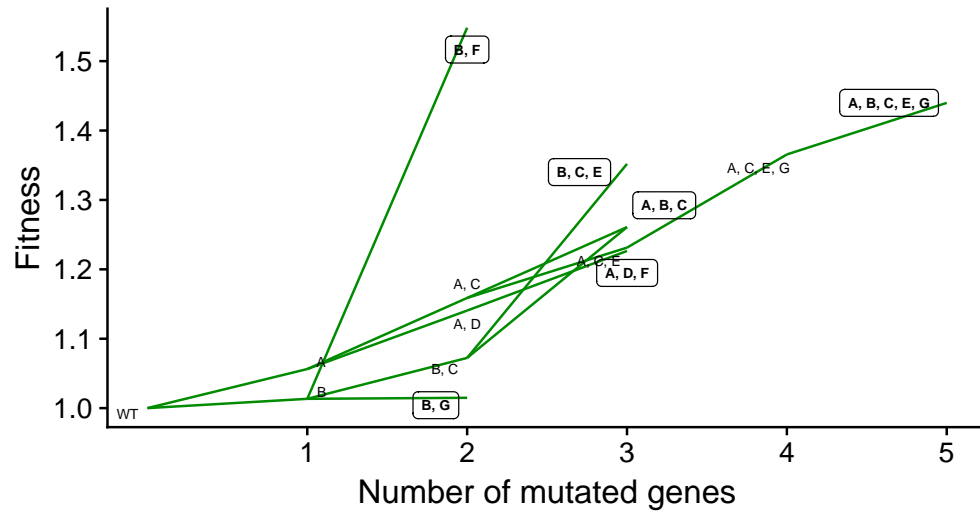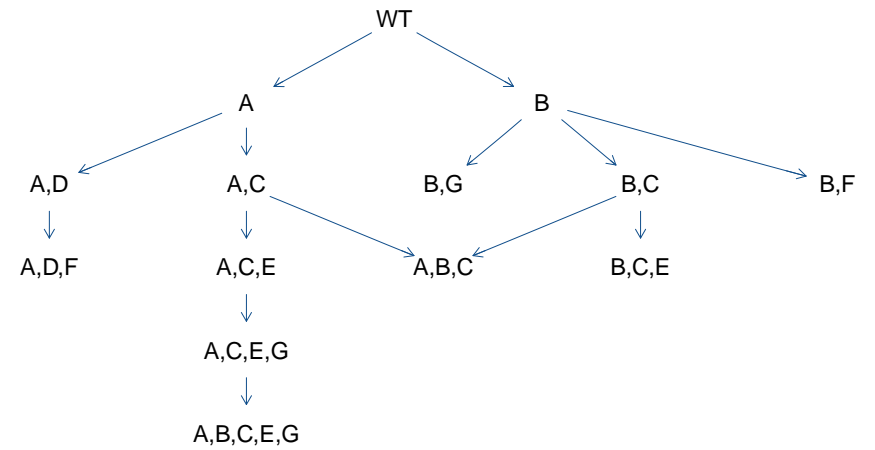

ID RnHnxYc271fXVfMs  
 acc genotypes 57  
 peaks no back 15  
 removed edges NA  
 prop rem edges NA

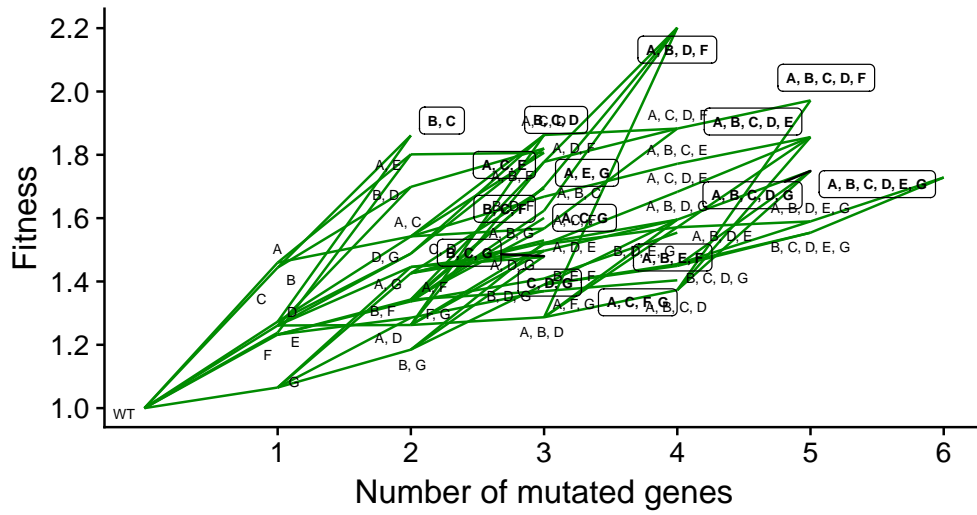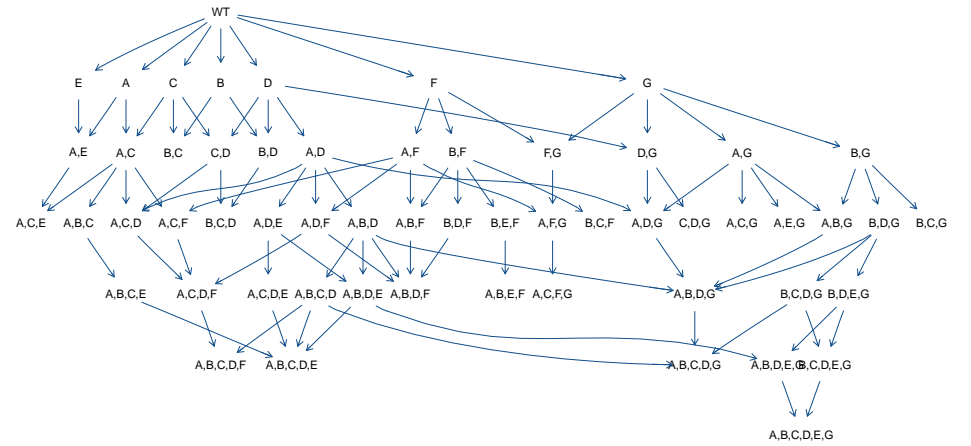



ID rX57ibCOZcMSMm4z  
 acc genotypes 30  
 peaks no back 12  
 removed edges NA  
 prop rem edges NA

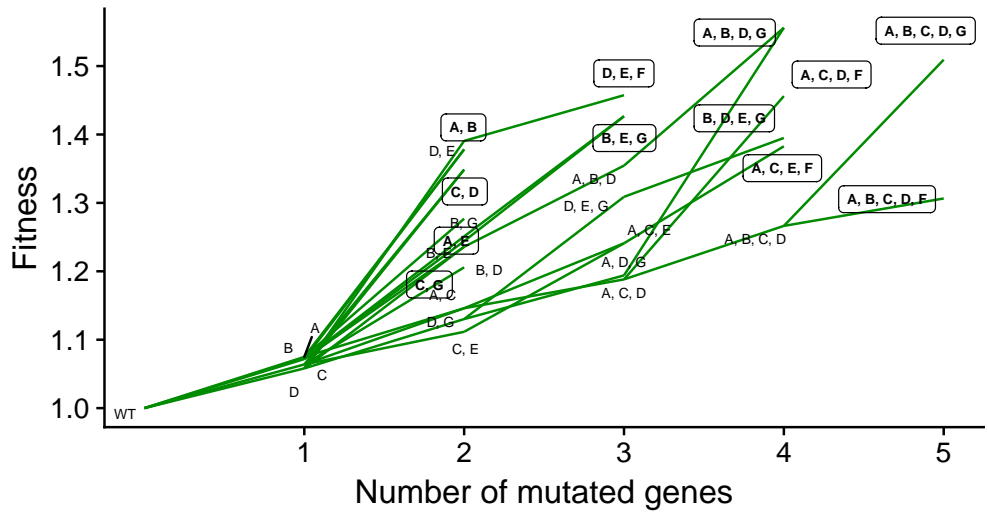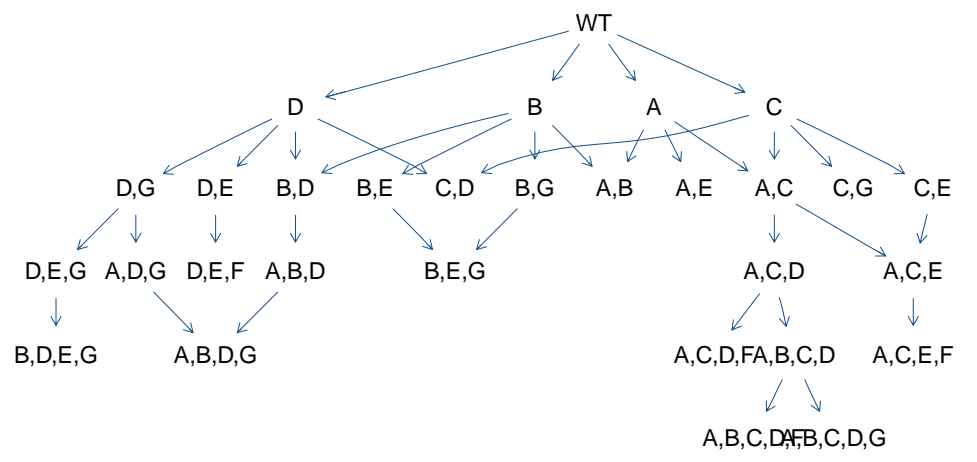

ID **s10ieWttHAueSTqaL**  
 acc genotypes **74**  
 peaks no back **25**  
 removed edges **NA**  
 prop rem edges **NA**

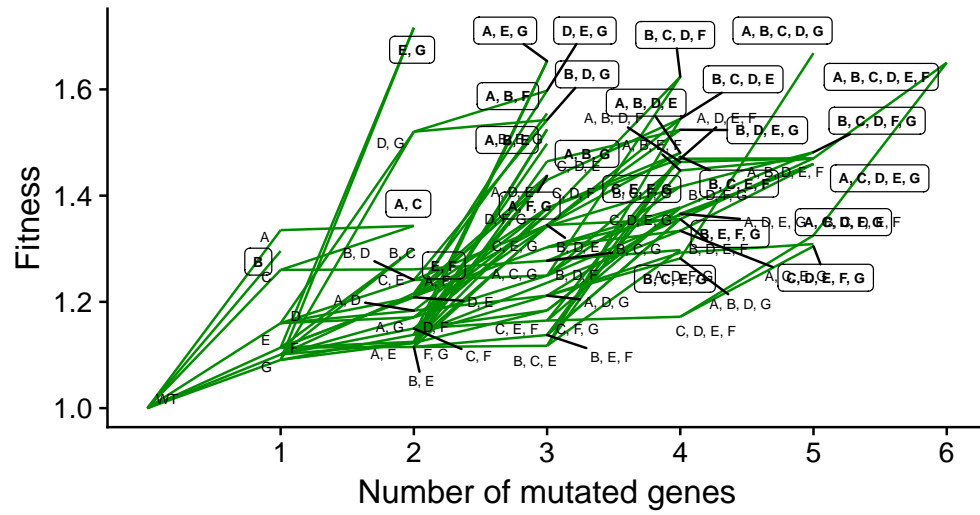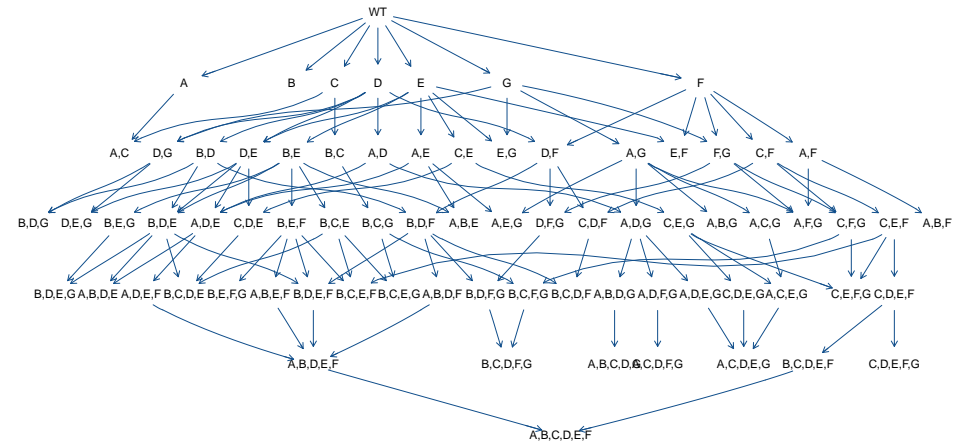

ID s5IzMrcmZRB5b6Mo  
 acc genotypes 28  
 peaks no back 10  
 removed edges NA  
 prop rem edges NA

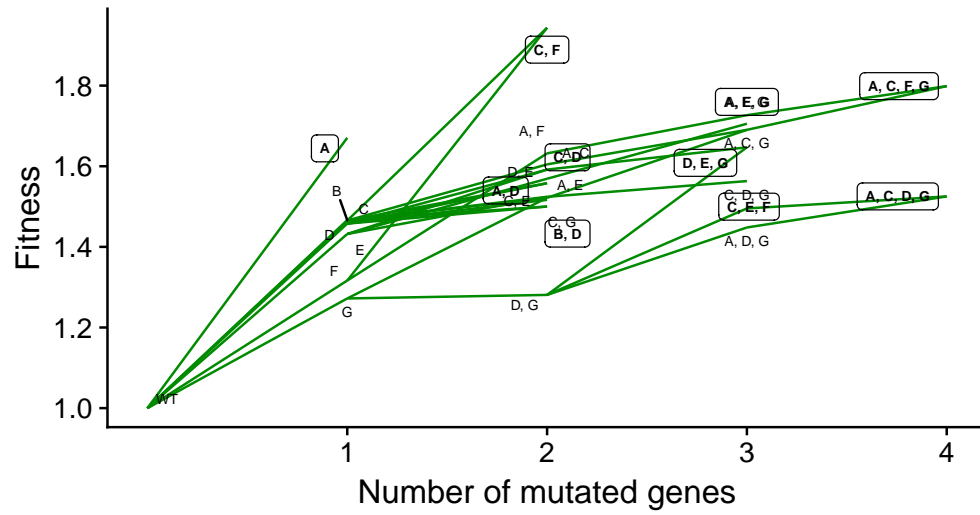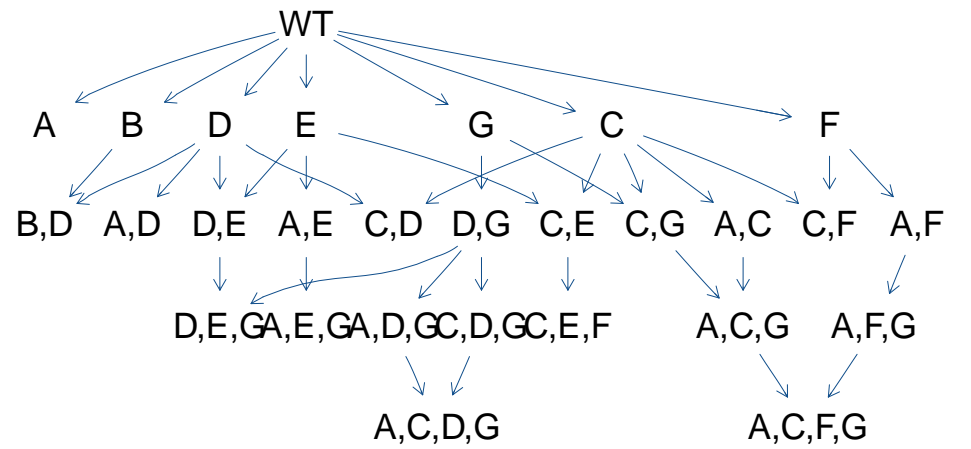

ID **sgP24AiGrN2fIVGV**  
 acc genotypes **43**  
 peaks no back 10  
 removed edges NA  
 prop rem edges NA

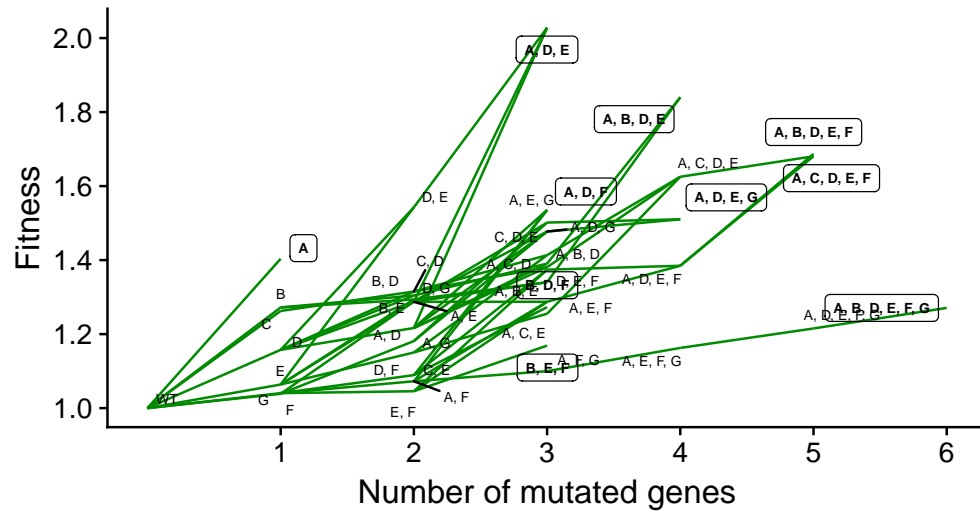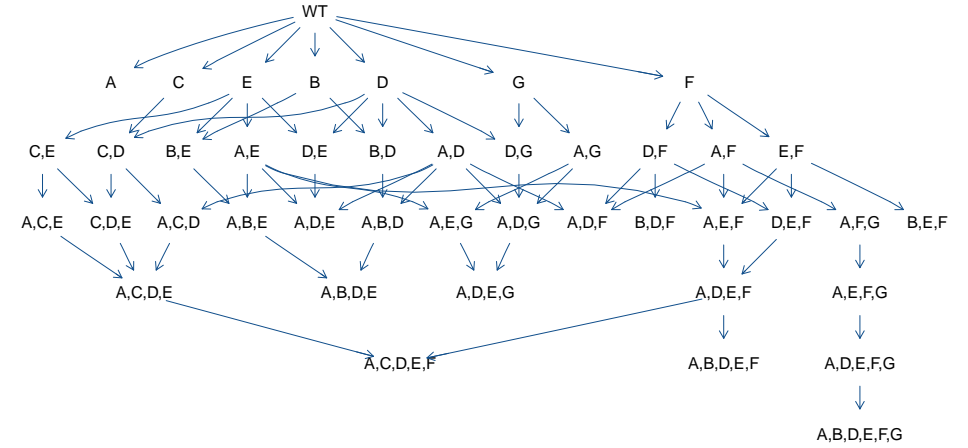



ID [sJhH8DjY2yo2ZZQjo](#)  
 acc genotypes 19  
 peaks no back 8  
 removed edges NA  
 prop rem edges NA

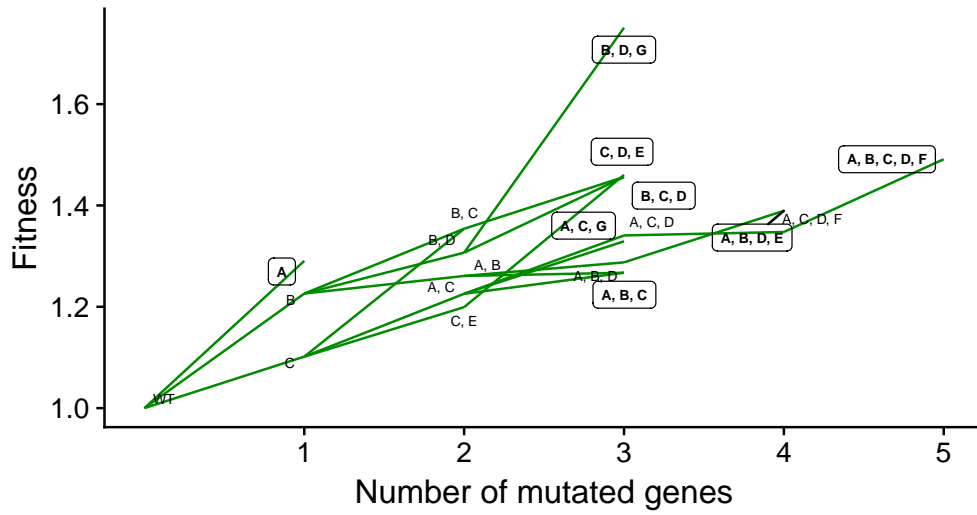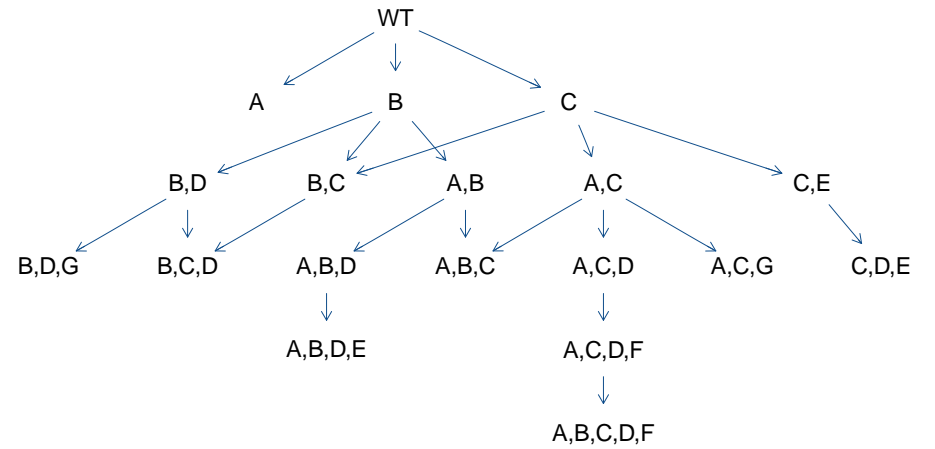

ID SpvxDYG1010zub43g5  
 acc genotypes 25  
 peaks no back 12  
 removed edges NA  
 prop rem edges NA

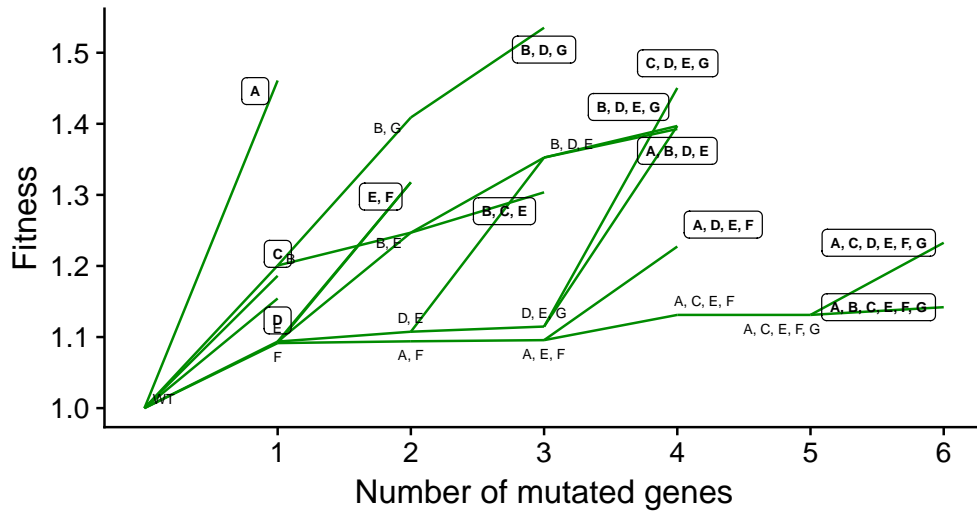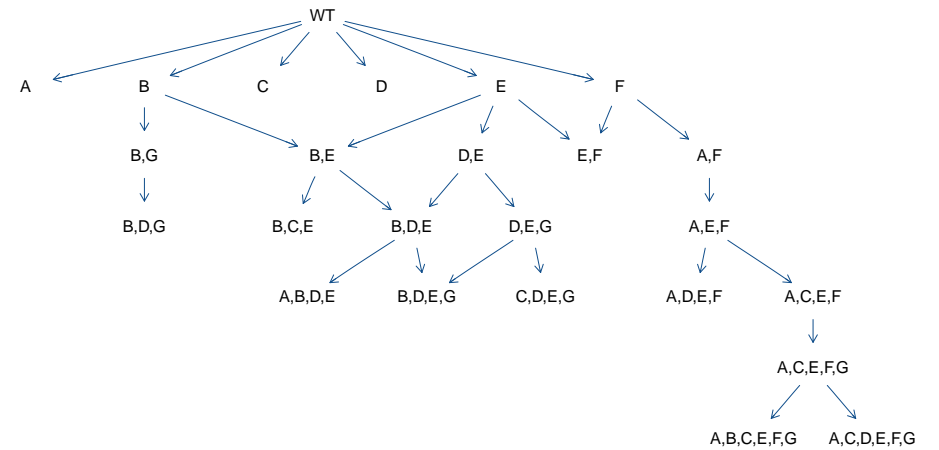

ID SRBzzEiA3CEpsfm  
 acc genotypes 51  
 peaks no back 12  
 removed edges NA  
 prop rem edges NA

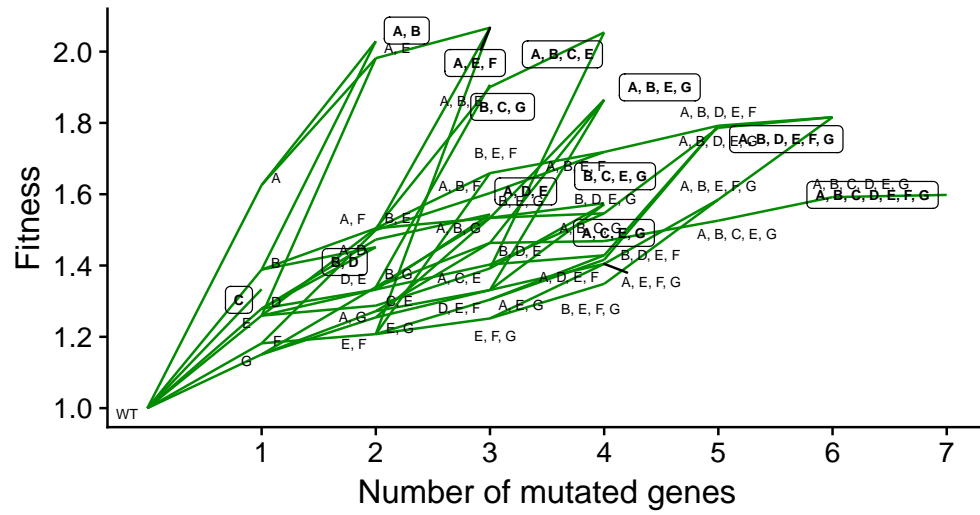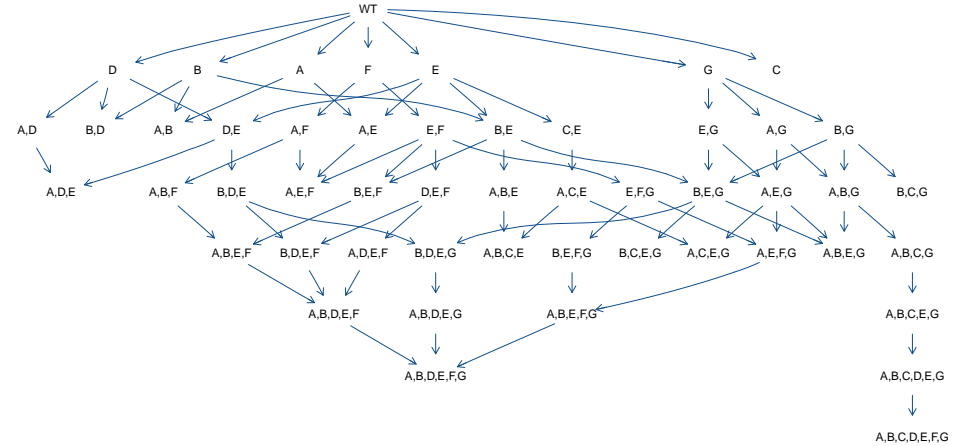

ID SWE6nweARORL1yFW  
 acc genotypes 19  
 peaks no back 6  
 removed edges NA  
 prop rem edges NA

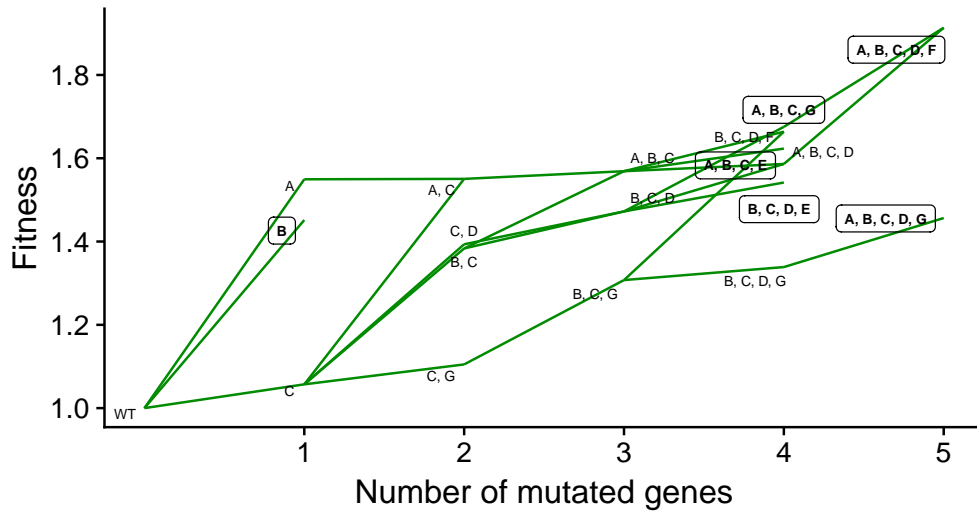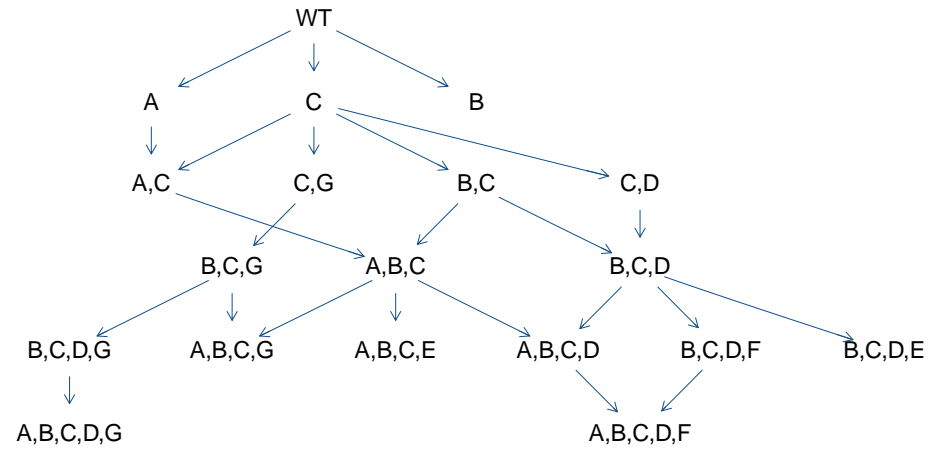

ID t10CCmCuCK9esa9Rx  
 acc genotypes 55  
 peaks no back 20  
 removed edges NA  
 prop rem edges NA

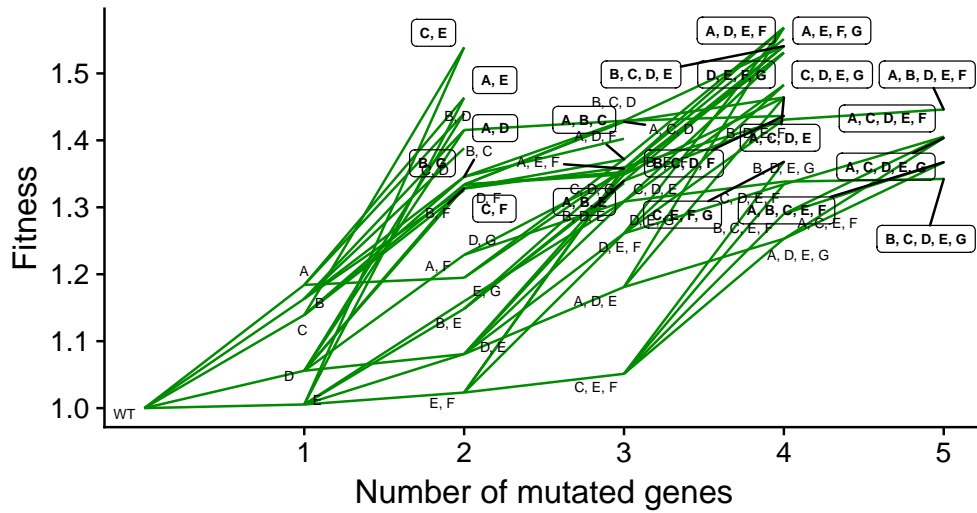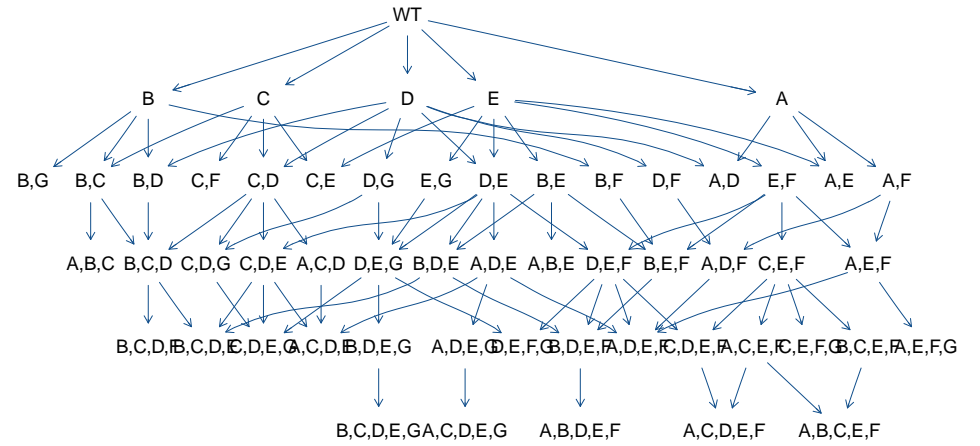

ID [tgqvbY64a2p366jT](#)  
 acc genotypes 46  
 peaks no back 14  
 removed edges NA  
 prop rem edges NA

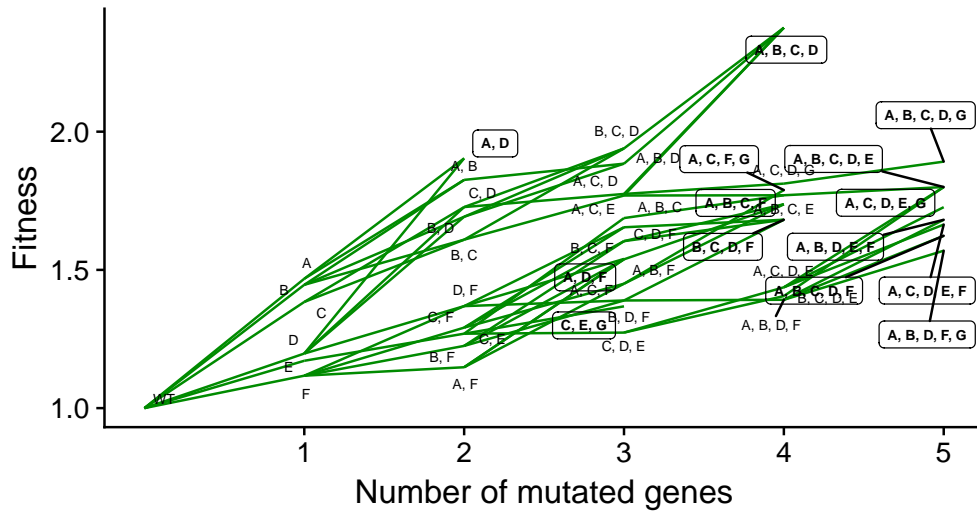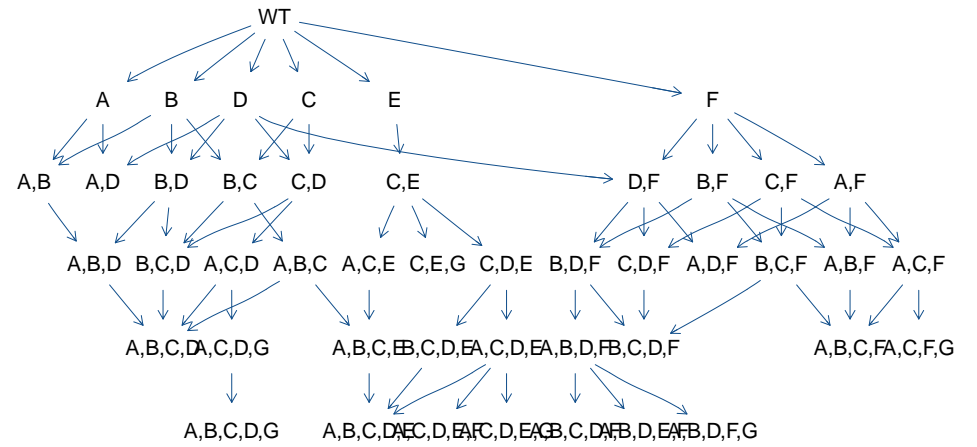

ID TgUTHKueceu4QsBH  
 acc genotypes 18  
 peaks no back 9  
 removed edges NA  
 prop rem edges NA

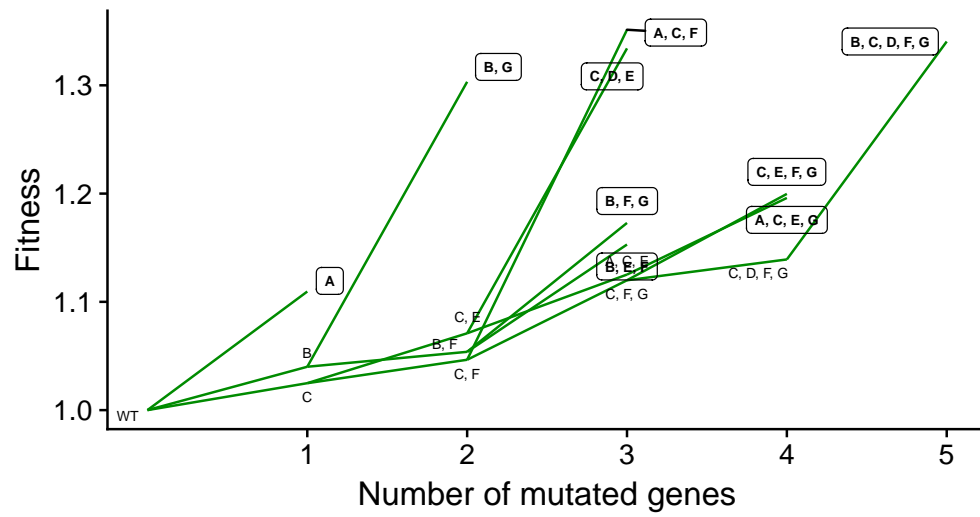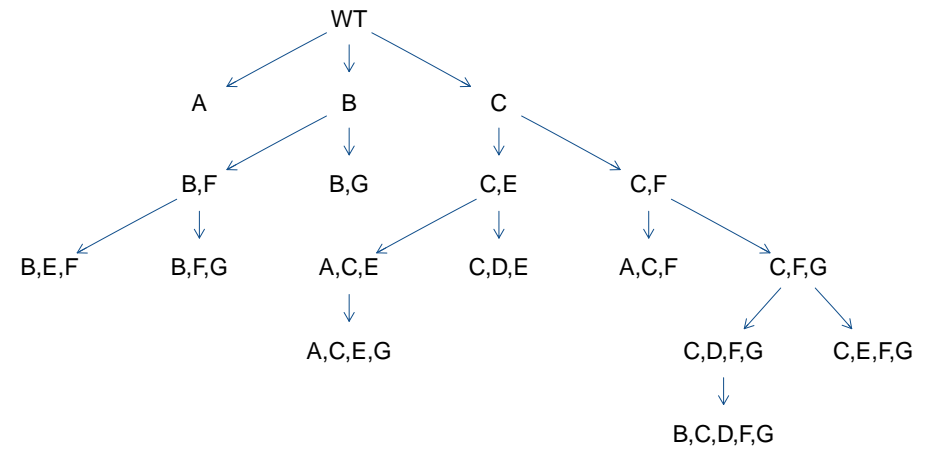

ID TgvwxlvA3lzbdsYC  
 acc genotypes 38  
 peaks no back 14  
 removed edges NA  
 prop rem edges NA

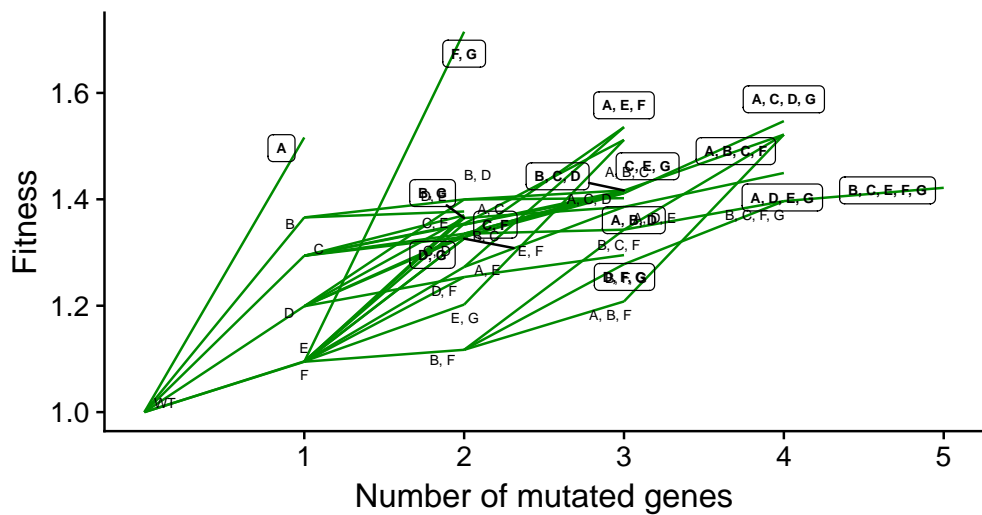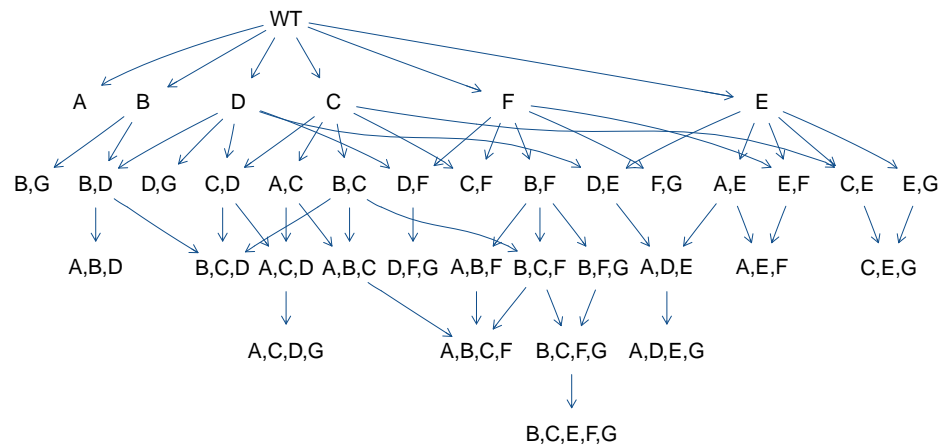



ID tHfMAysqiLPDZQ5  
 acc genotypes 23  
 peaks no back 7  
 removed edges NA  
 prop rem edges NA

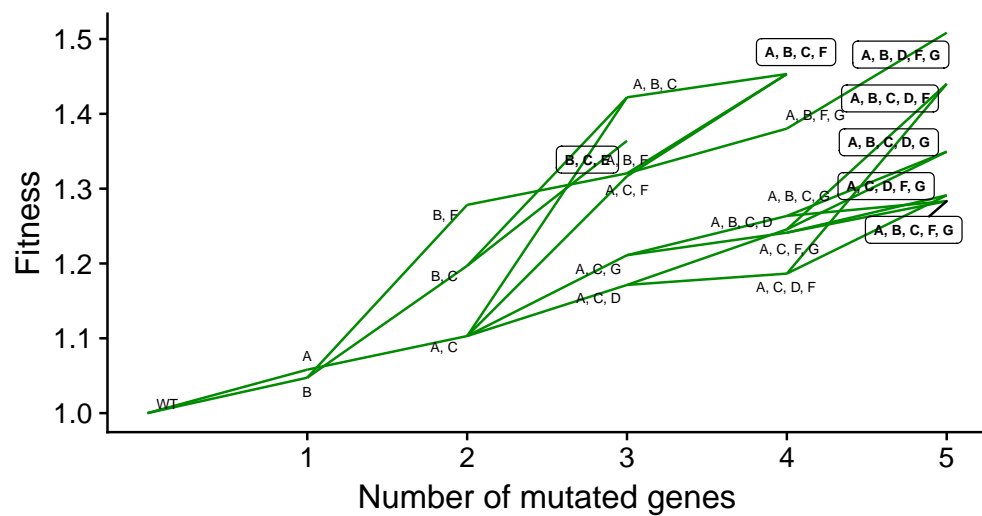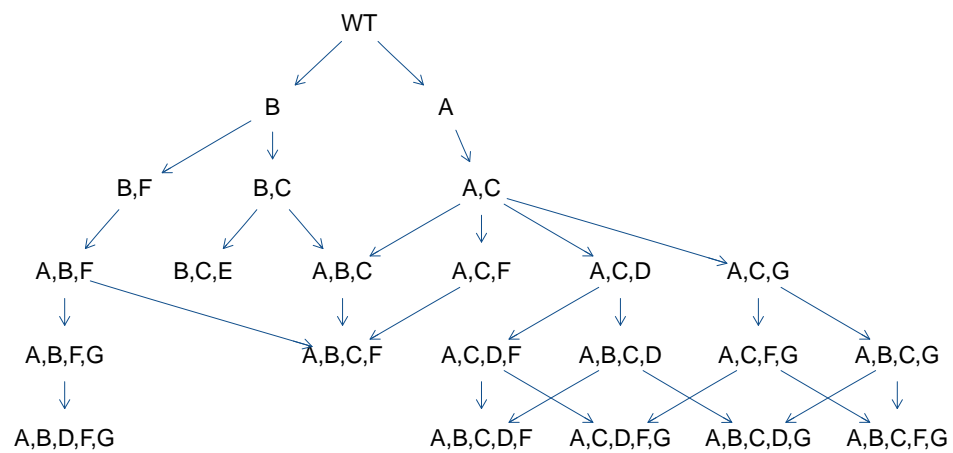

ID TJaonibPIMSgt1f  
 acc genotypes 24  
 peaks no back 12  
 removed edges NA  
 prop rem edges NA

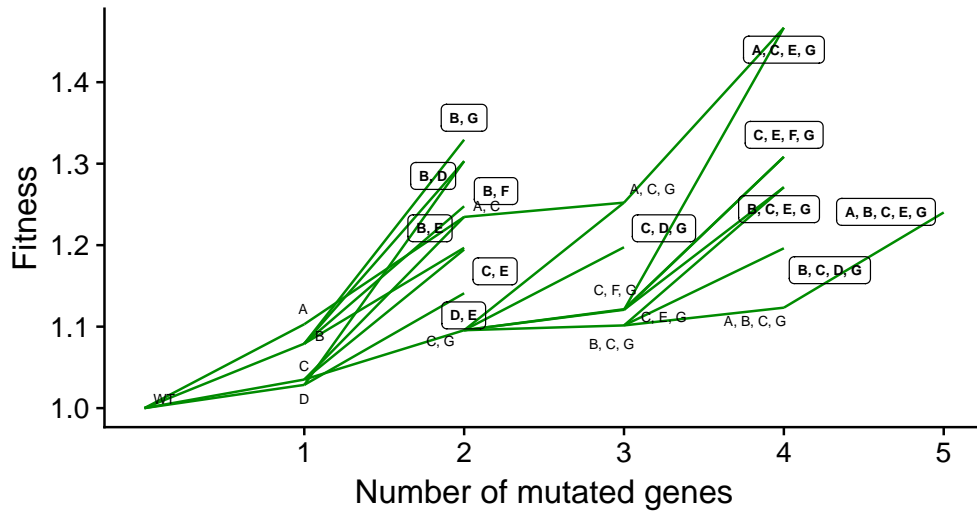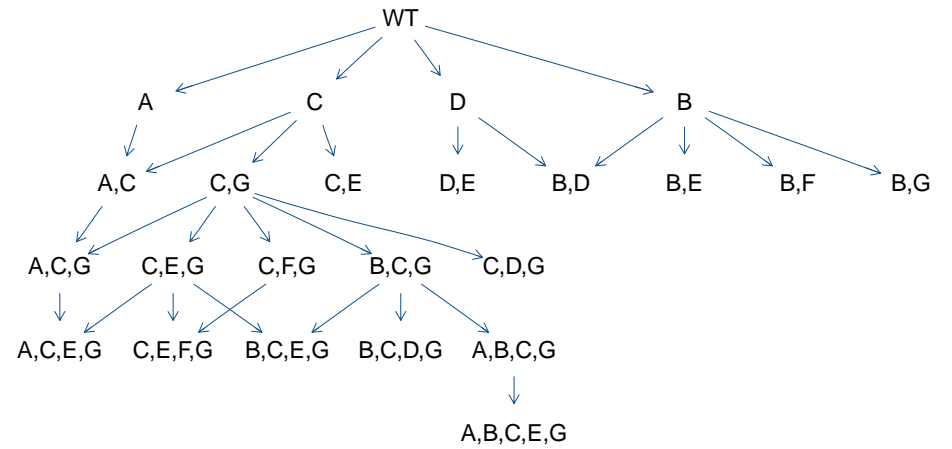

ID T110ATX82Nhqew8T7  
 acc genotypes 80  
 peaks no back 15  
 removed edges NA  
 prop rem edges NA

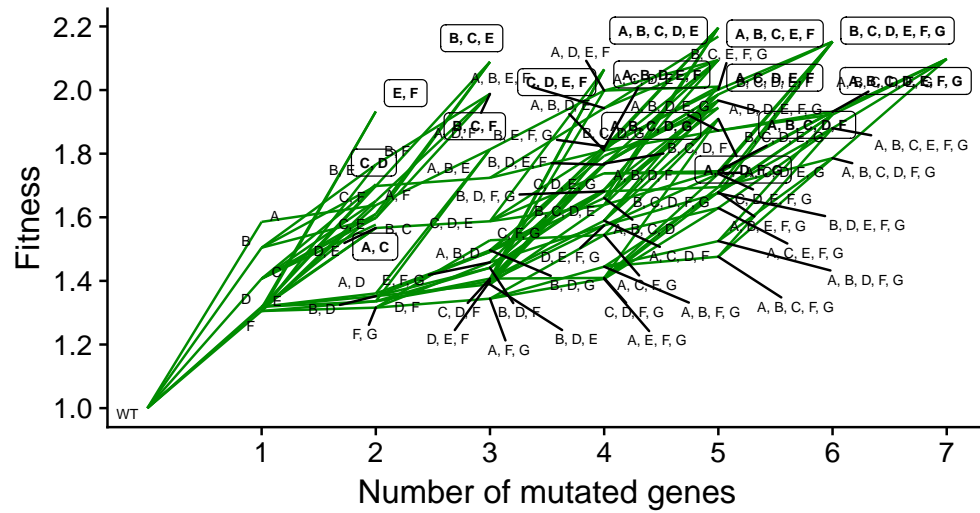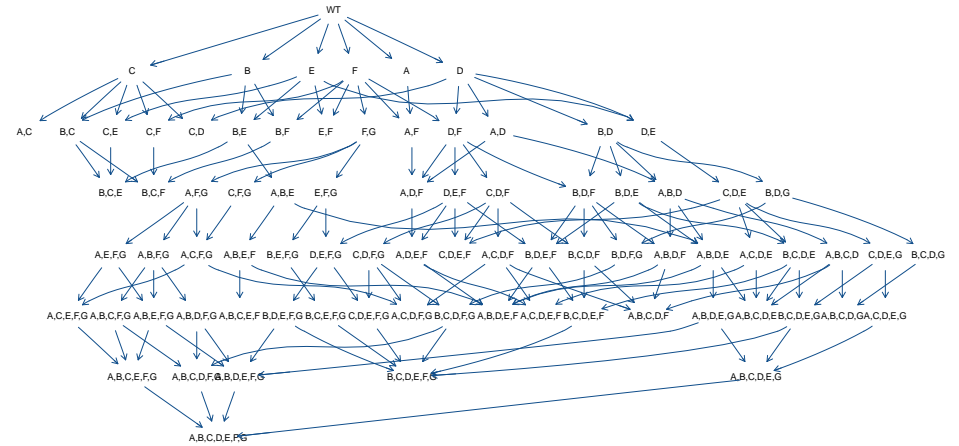

ID **tjFPA395CywDkbx**  
 acc genotypes **17**  
 peaks no back **8**  
 removed edges **NA**  
 prop rem edges **NA**

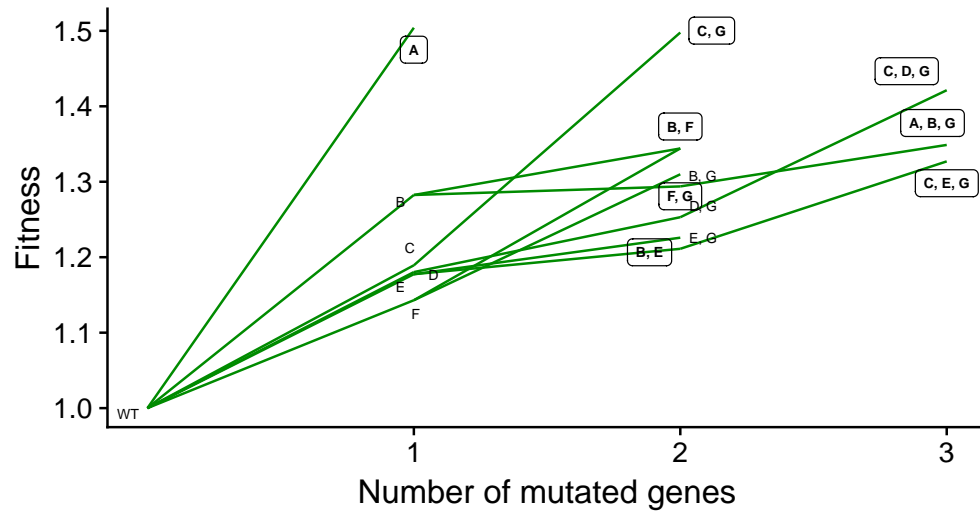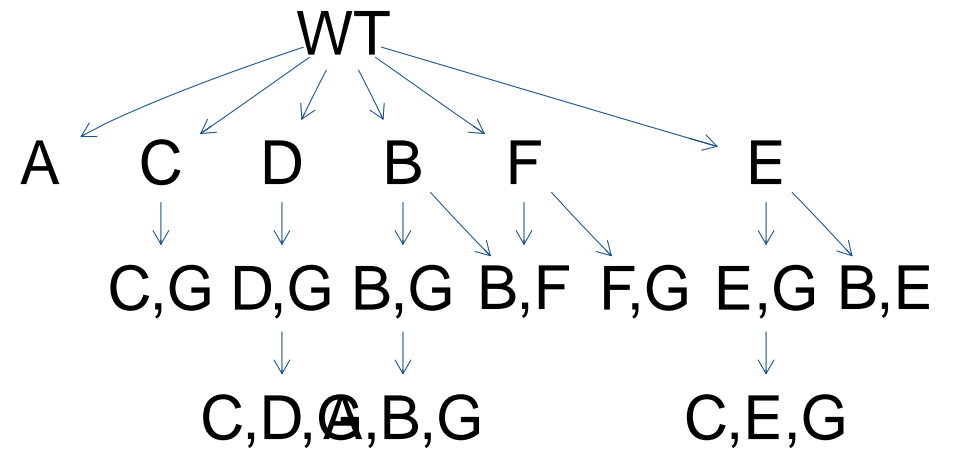

ID TonSIXDkiuvbNr6  
 acc genotypes 64  
 peaks no back 16  
 removed edges NA  
 prop rem edges NA

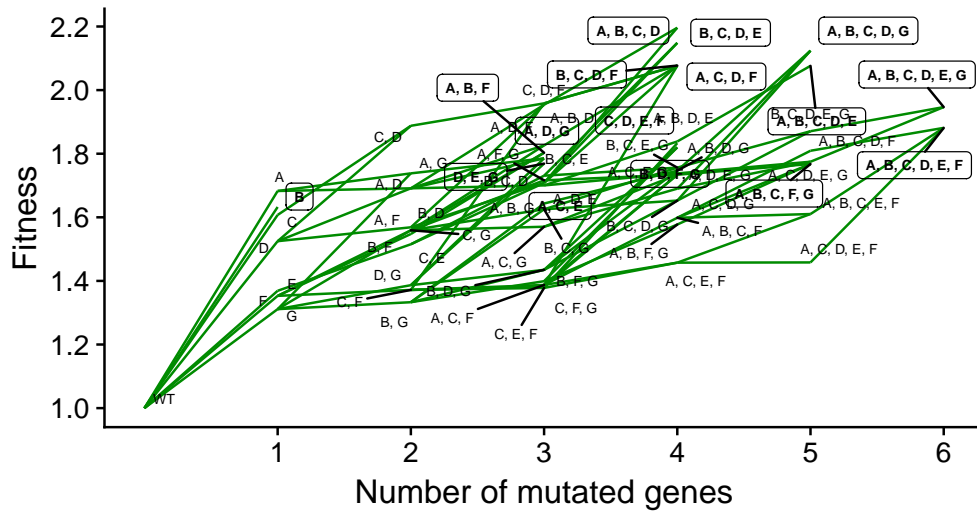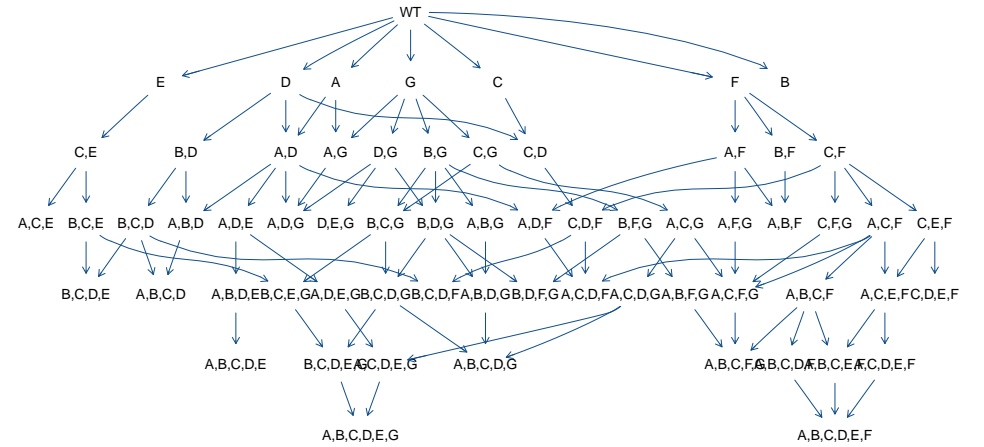

ID TuigQ6ZYersjqG8r  
 acc genotypes 19  
 peaks no back 9  
 removed edges NA  
 prop rem edges NA

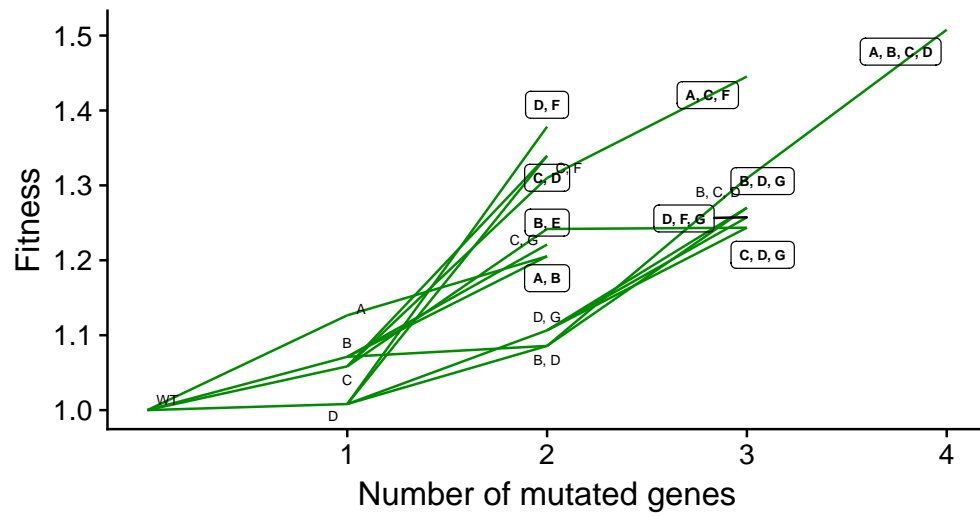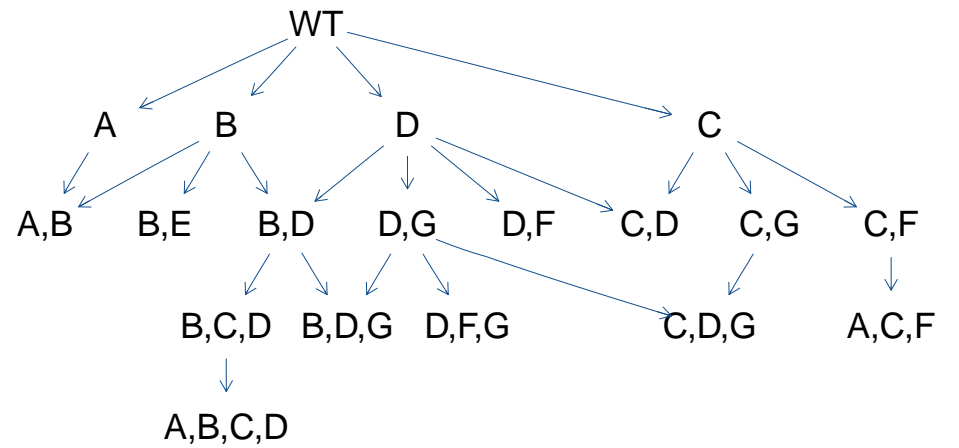

ID U2qBdGfdtF10VB9Ww  
 acc genotypes 30  
 peaks no back 12  
 removed edges NA  
 prop rem edges NA

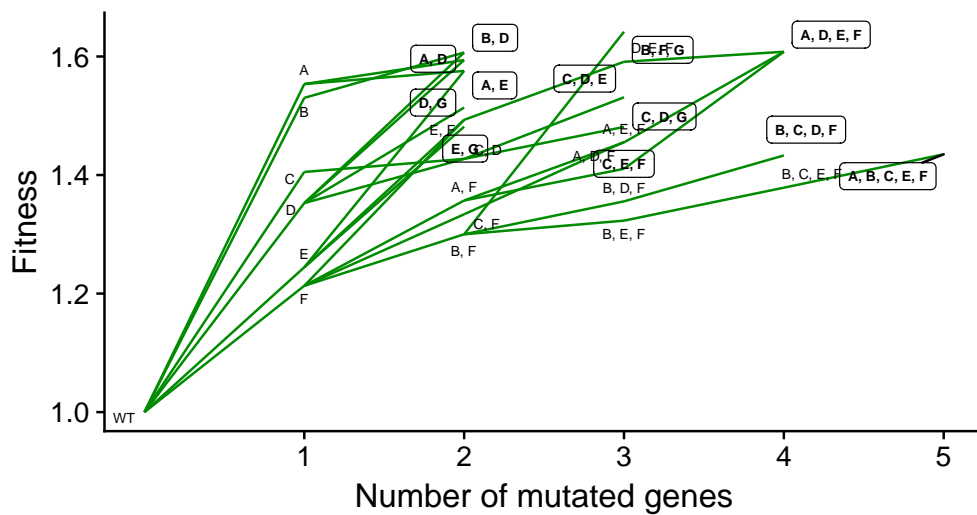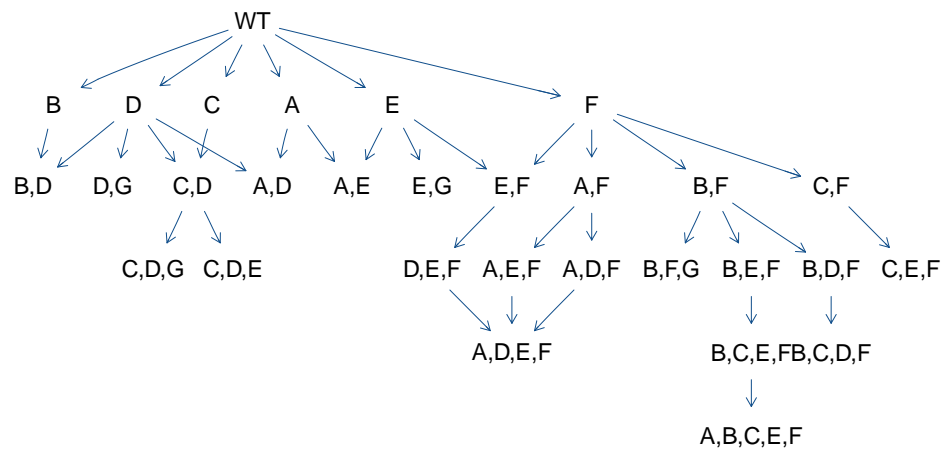

ID **U7R64nQkQjJju**  
 acc genotypes **43**  
 peaks no back **14**  
 removed edges **NA**  
 prop rem edges **NA**

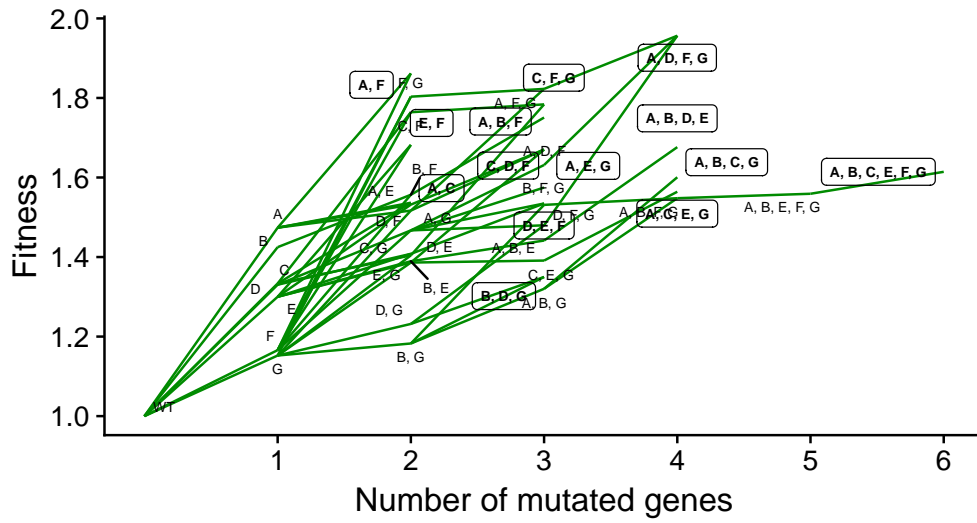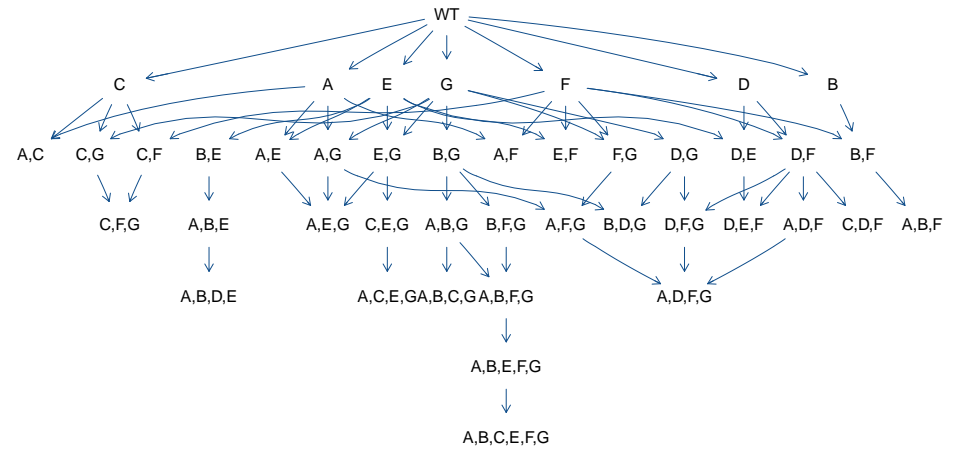



ID usBeU10iBdpLaKISX  
 acc genotypes 14  
 peaks no back 7  
 removed edges NA  
 prop rem edges NA

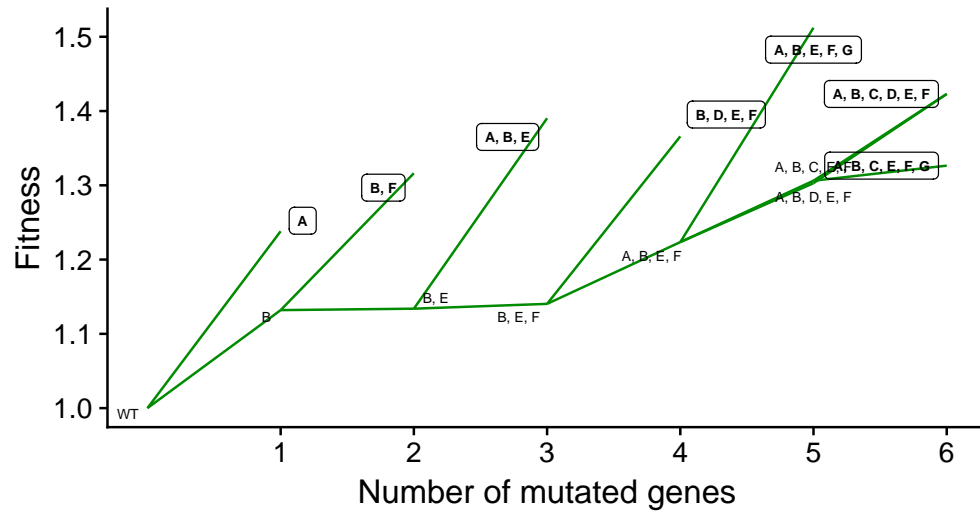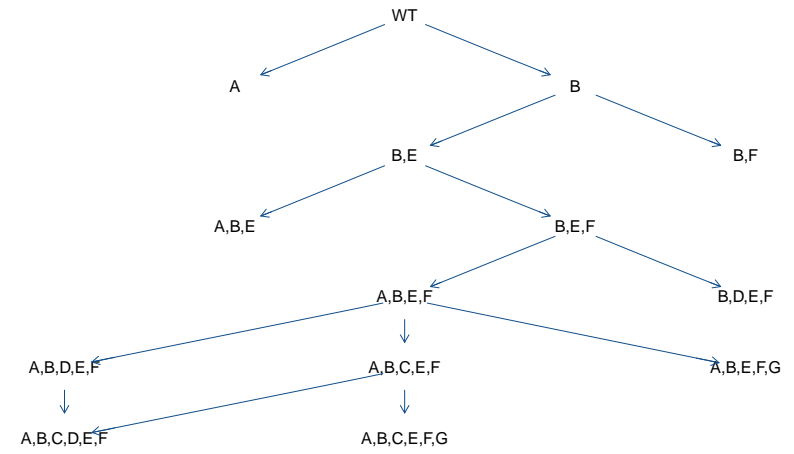

ID uTuVU1GMy3Xg8Zye  
 acc genotypes 43  
 peaks no back 17  
 removed edges NA  
 prop rem edges NA

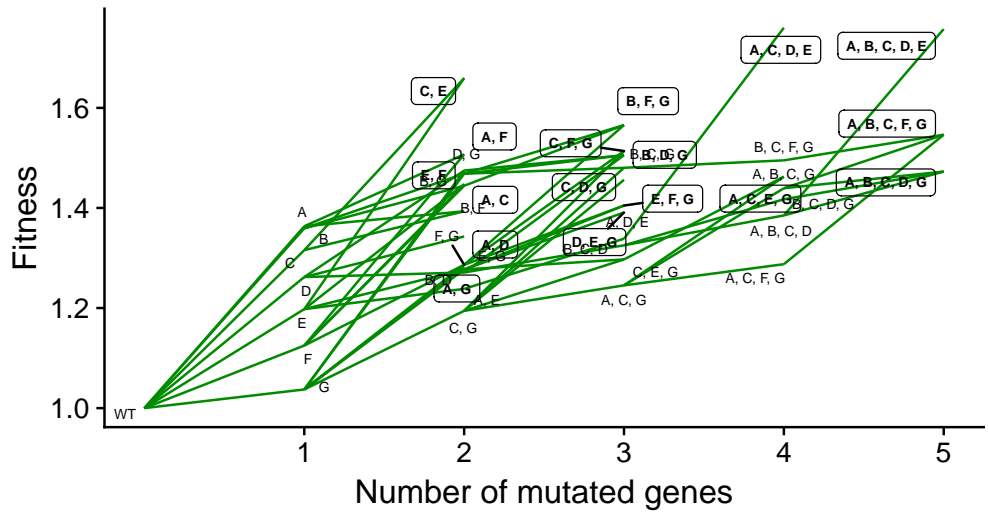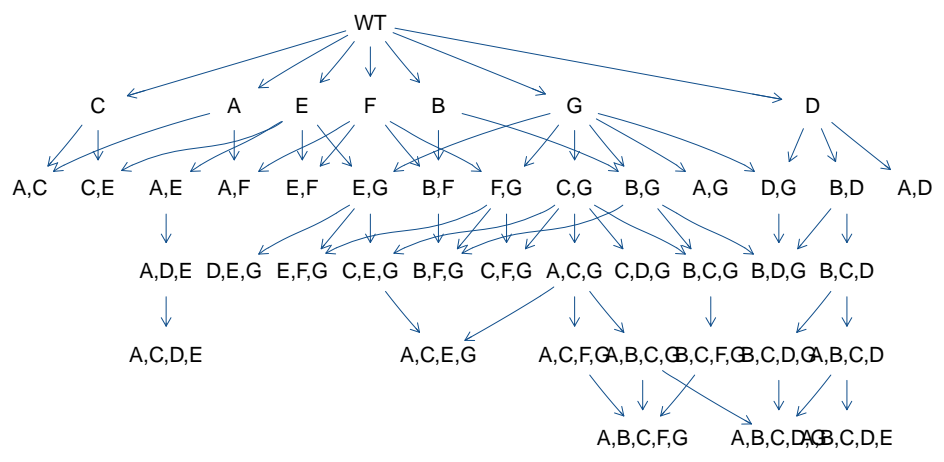

ID [uxdKQzl2TafUiD7b](#)  
 acc genotypes 42  
 peaks no back 17  
 removed edges NA  
 prop rem edges NA

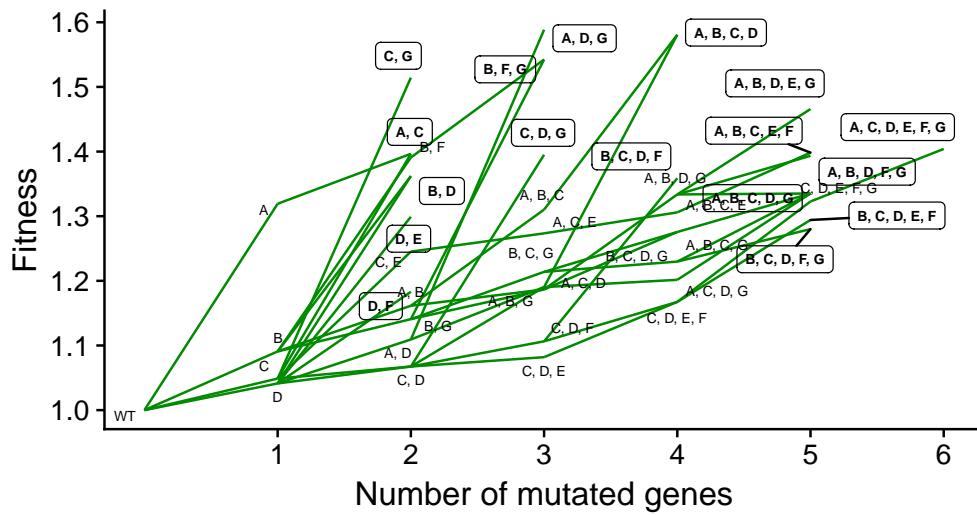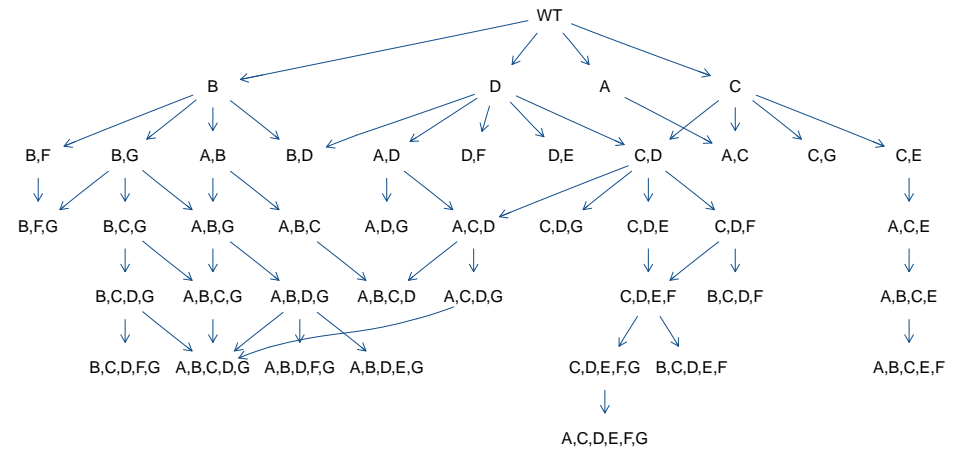

ID vFhJDZxTJ3k4epfY  
 acc genotypes 49  
 peaks no back 19  
 removed edges NA  
 prop rem edges NA

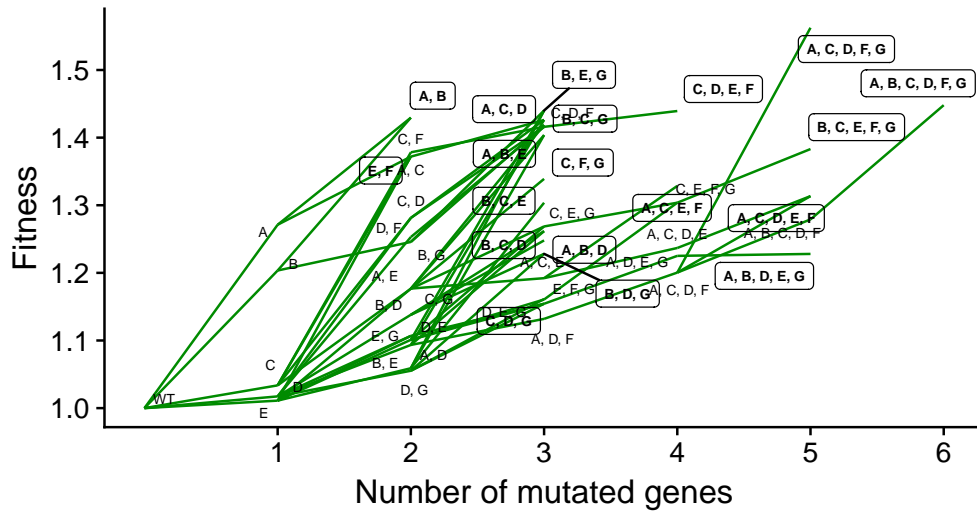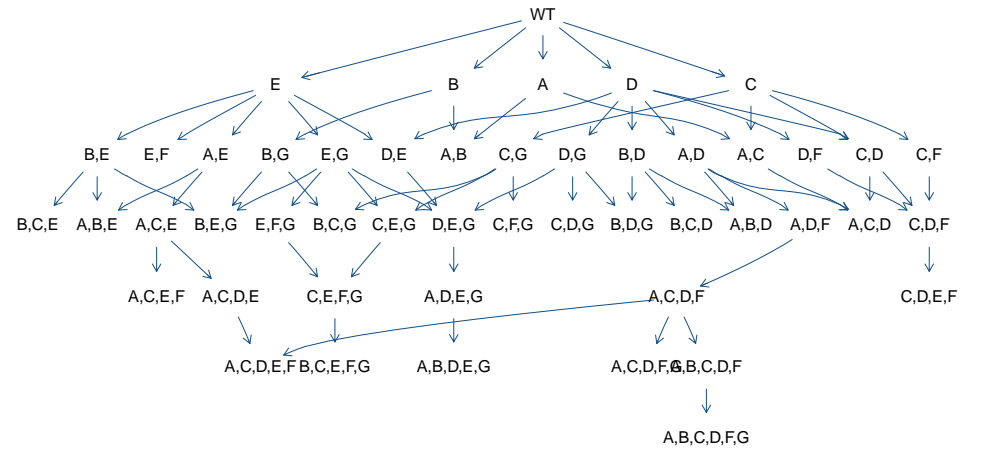

ID **vmQ3luxZBIZ10PMCg**  
 acc genotypes **25**  
 peaks no back **9**  
 removed edges **NA**  
 prop rem edges **NA**

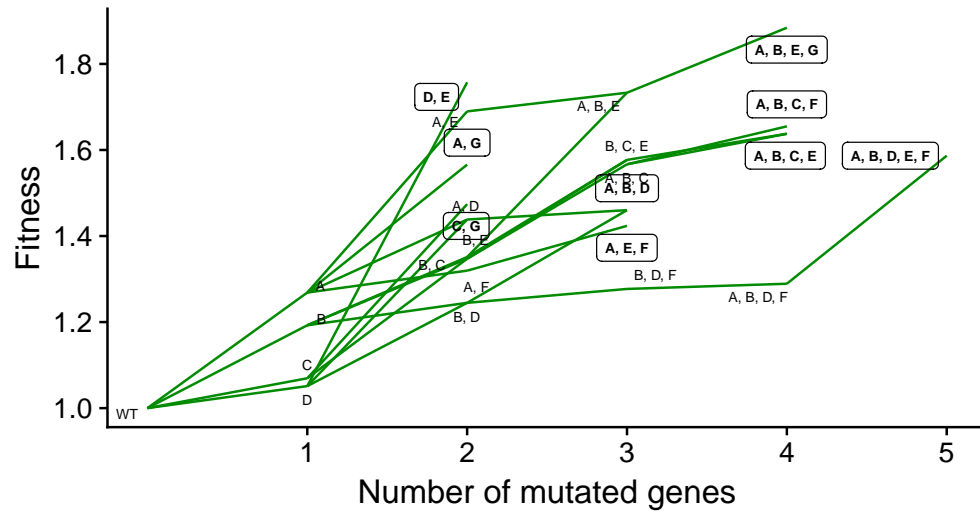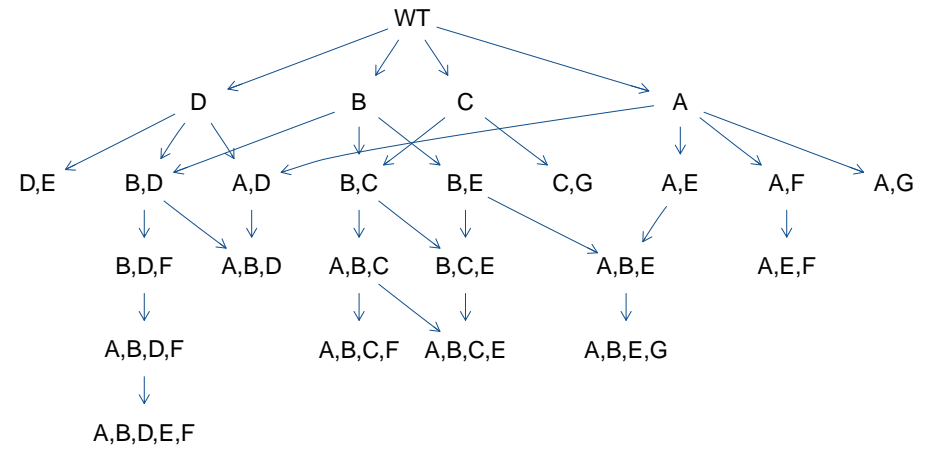

ID vt56Tsvc76JVWmej  
 acc genotypes 20  
 peaks no back 5  
 removed edges NA  
 prop rem edges NA

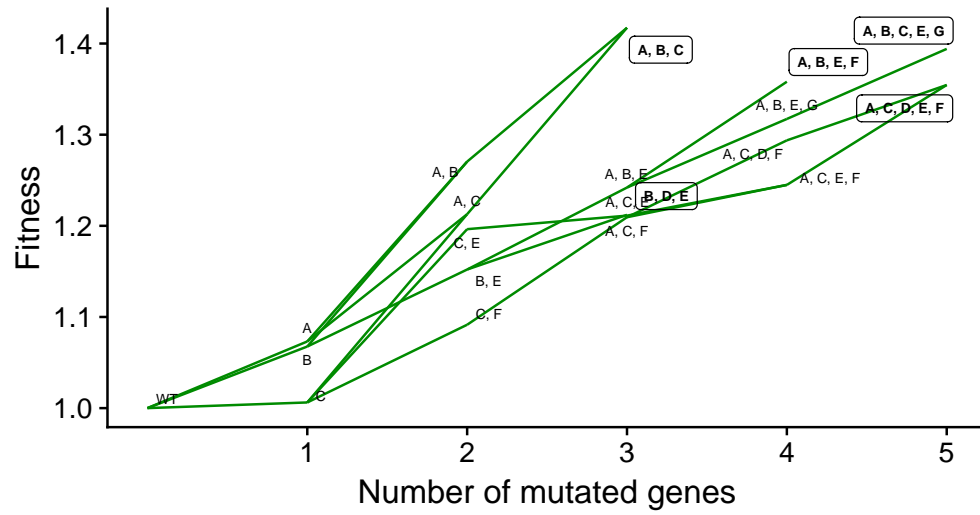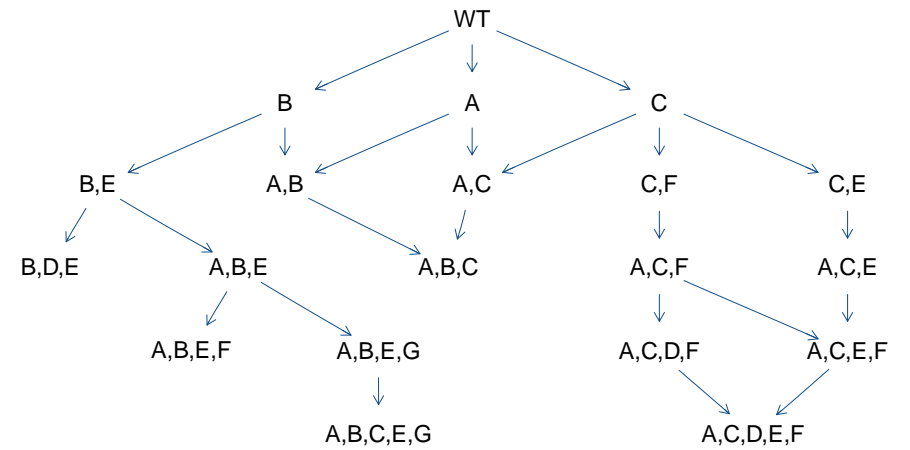

ID vweucMX7s10v2ZeDw  
 acc genotypes 57  
 peaks no back 13  
 removed edges NA  
 prop rem edges NA

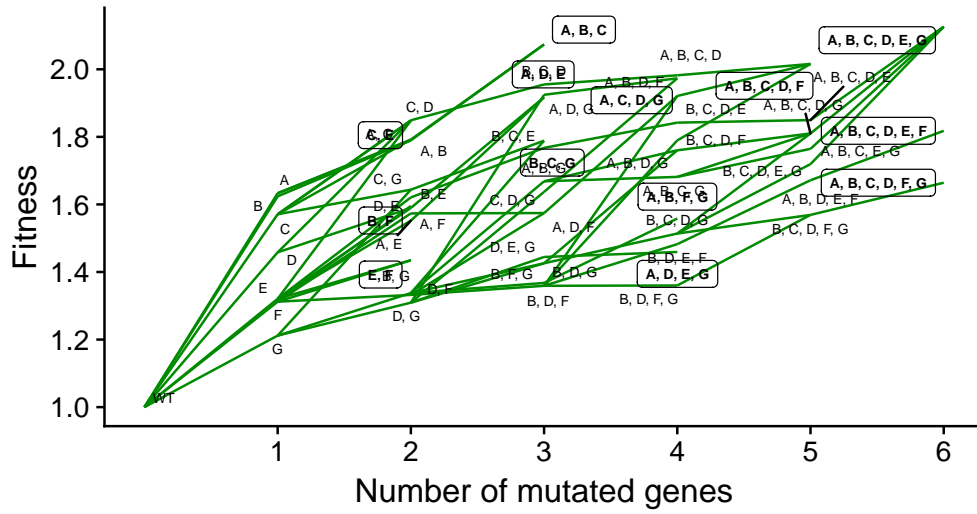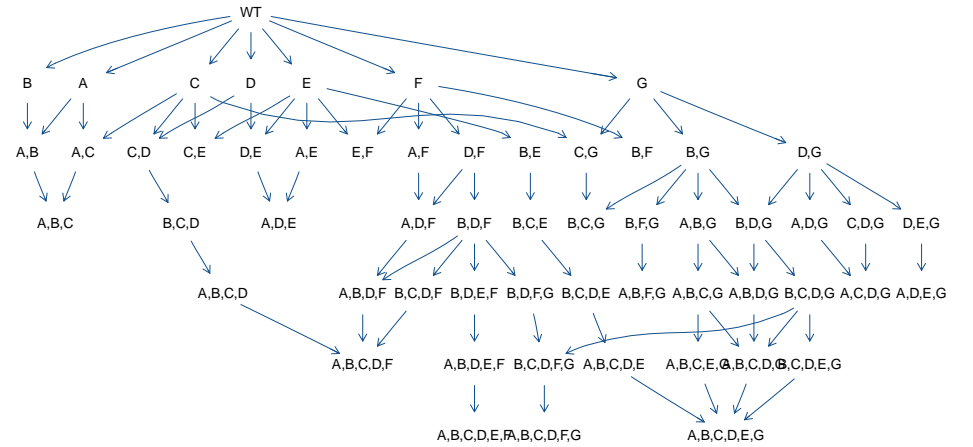

ID [w3y65fSHEfh1Qrj](#)  
 acc genotypes 45  
 peaks no back 15  
 removed edges NA  
 prop rem edges NA

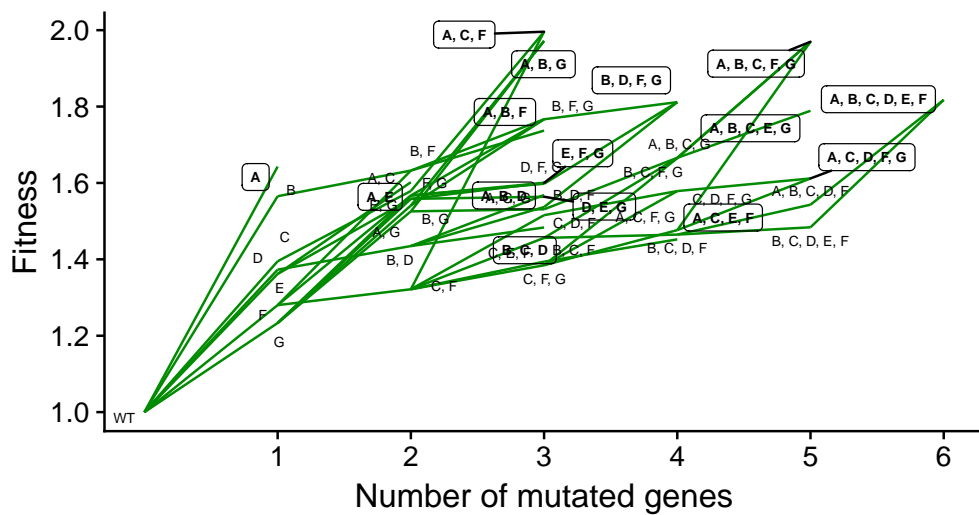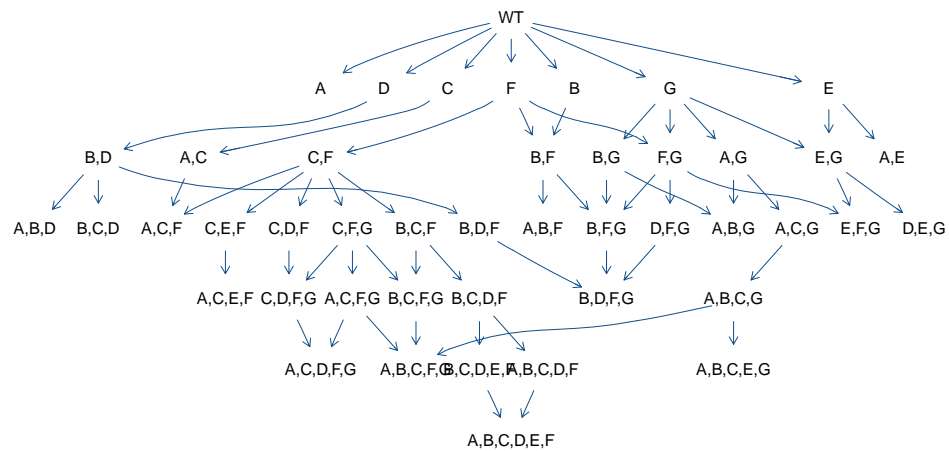



ID [W7VVpn96d4J5b6gp](#)  
 acc genotypes 43  
 peaks no back 13  
 removed edges NA  
 prop rem edges NA

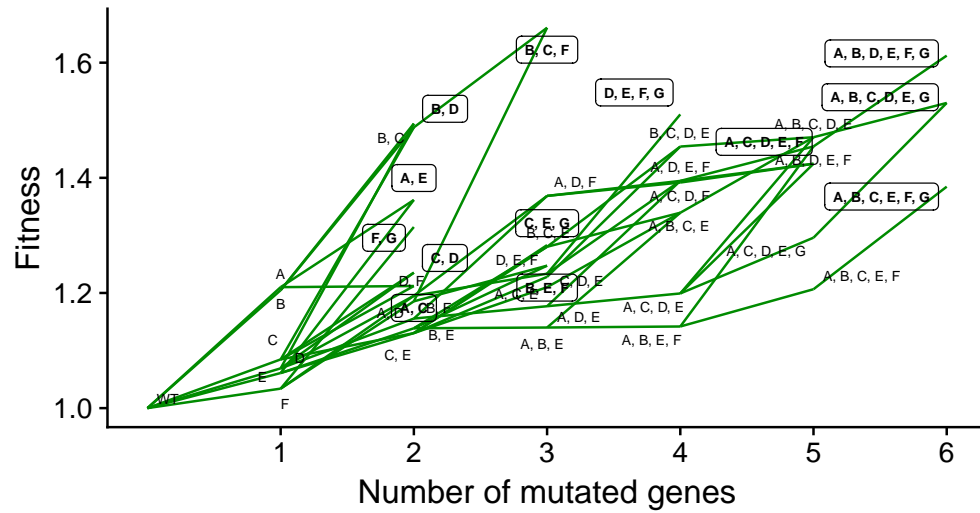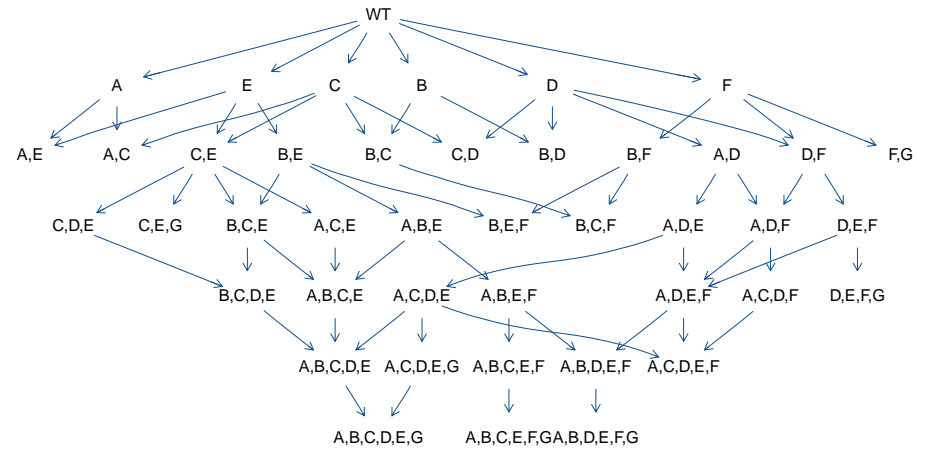



ID WTbc1BmerHlsalgq  
 acc genotypes 38  
 peaks no back 15  
 removed edges NA  
 prop rem edges NA

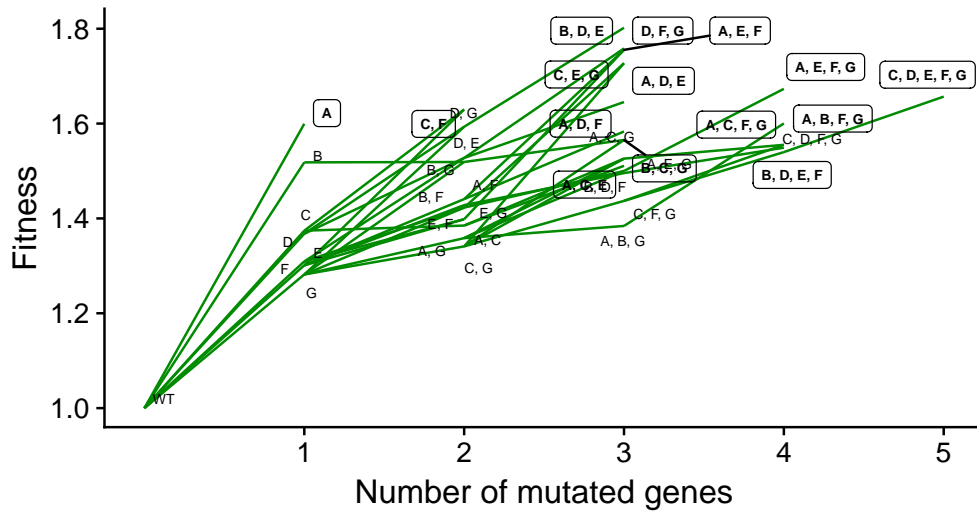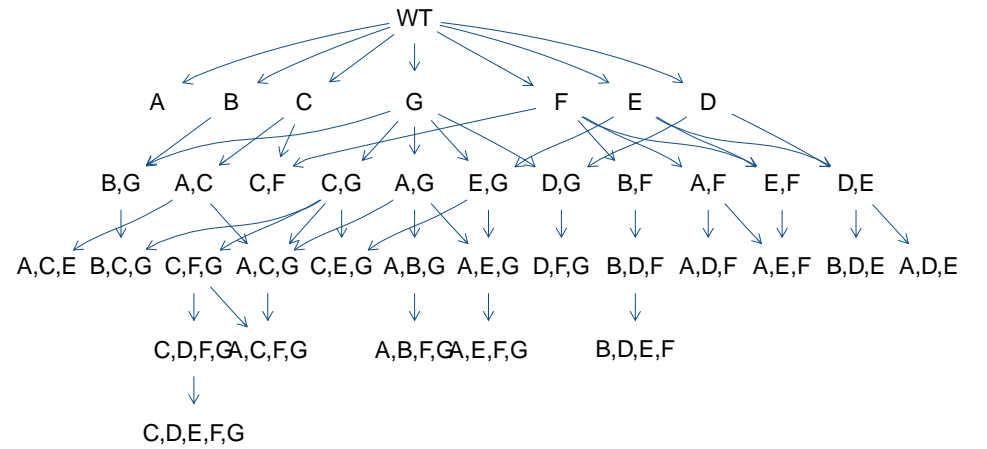

ID WuYVFvHnmpxvVWQi  
 acc genotypes 72  
 peaks no back 20  
 removed edges NA  
 prop rem edges NA

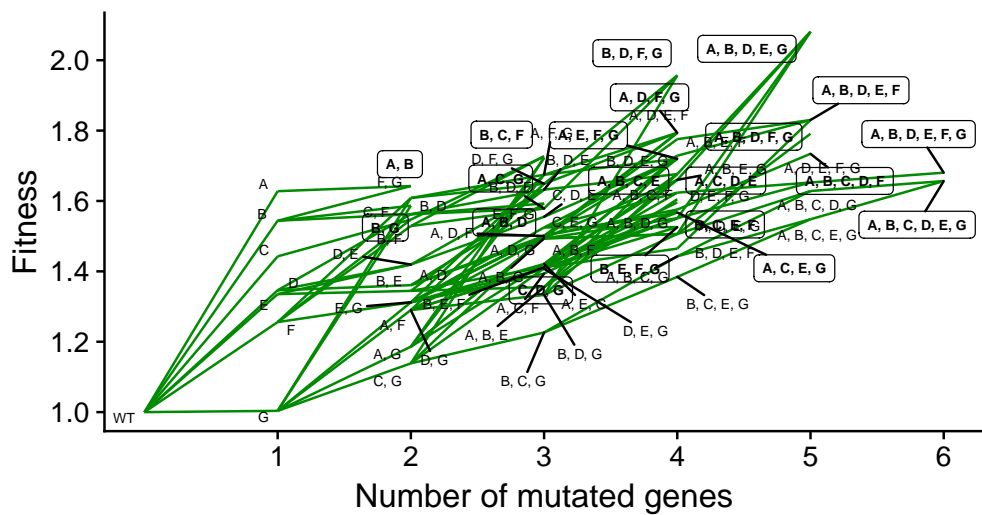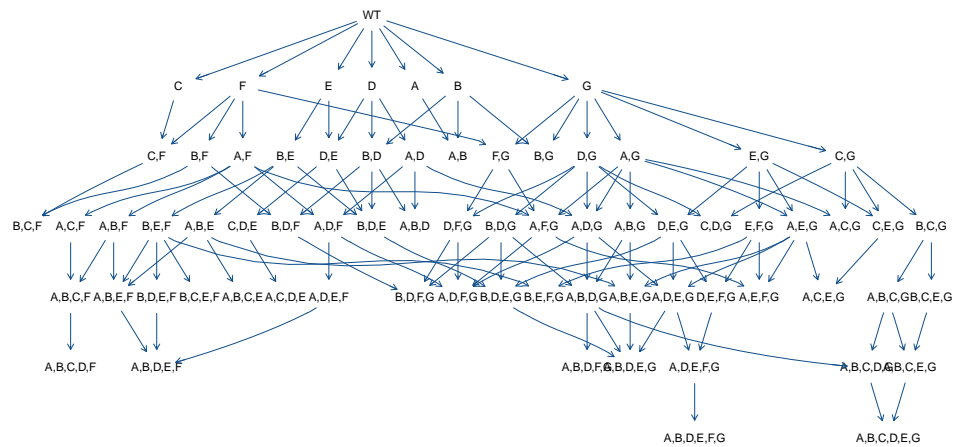

ID **WXvNSe1IPVS5wf7B**  
 acc genotypes **46**  
 peaks no back **14**  
 removed edges **NA**  
 prop rem edges **NA**

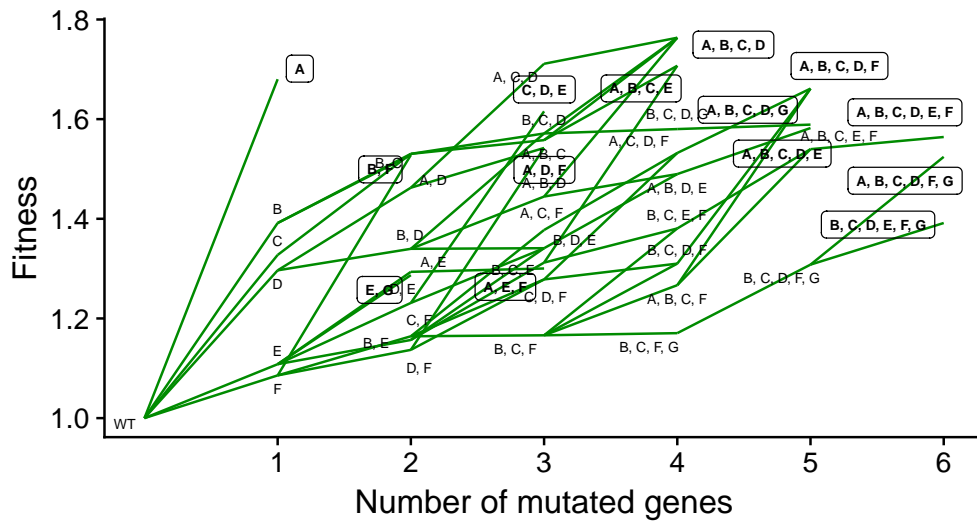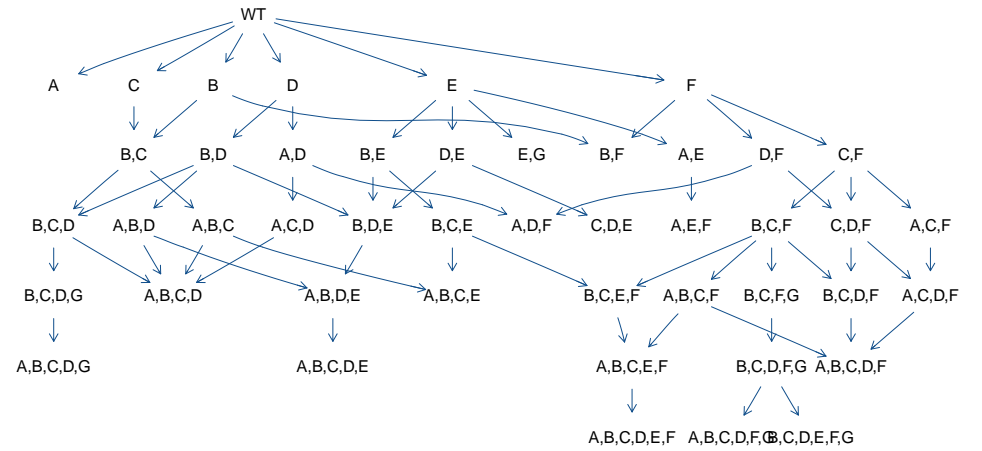

ID x4ZFzf8D5q4Z4anR  
 acc genotypes 11  
 peaks no back 4  
 removed edges NA  
 prop rem edges NA

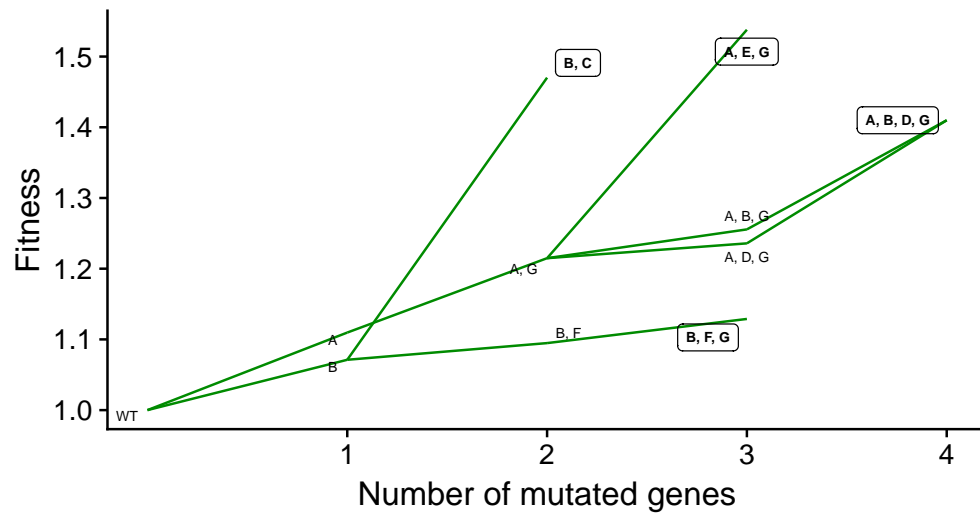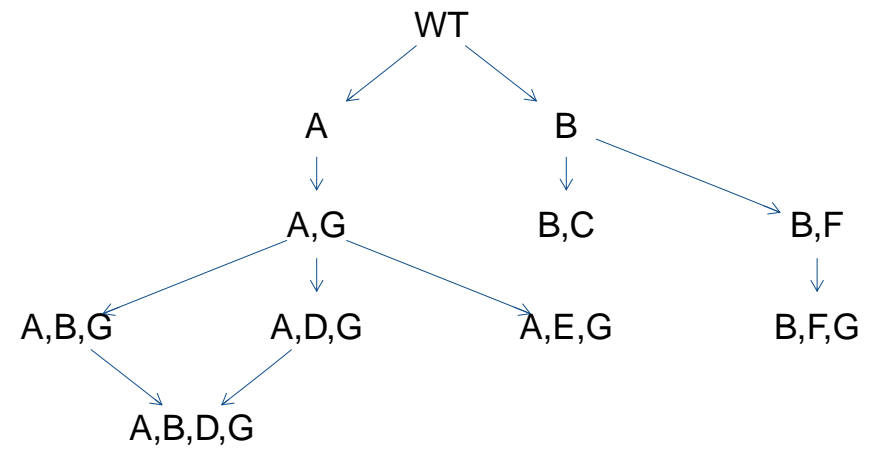

ID x53kISyIIWMWcjly  
 acc genotypes 22  
 peaks no back 6  
 removed edges NA  
 prop rem edges NA

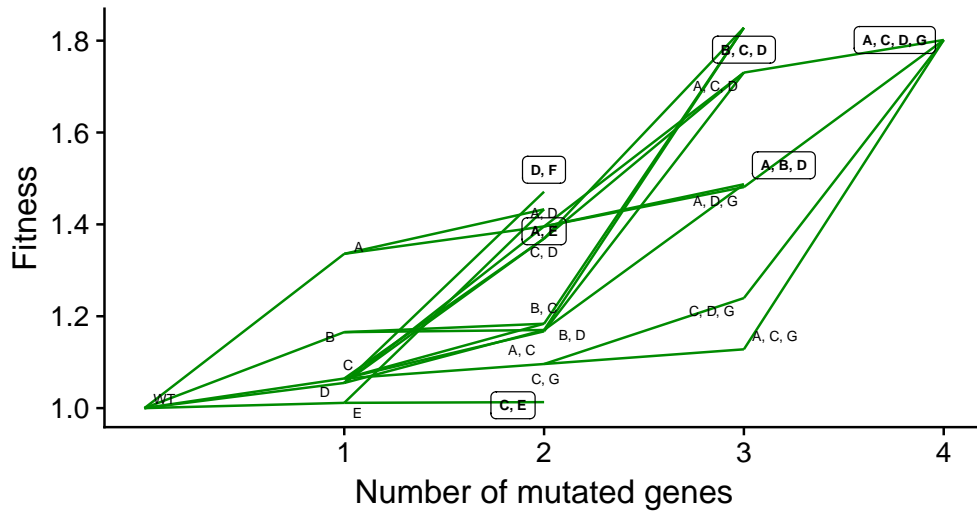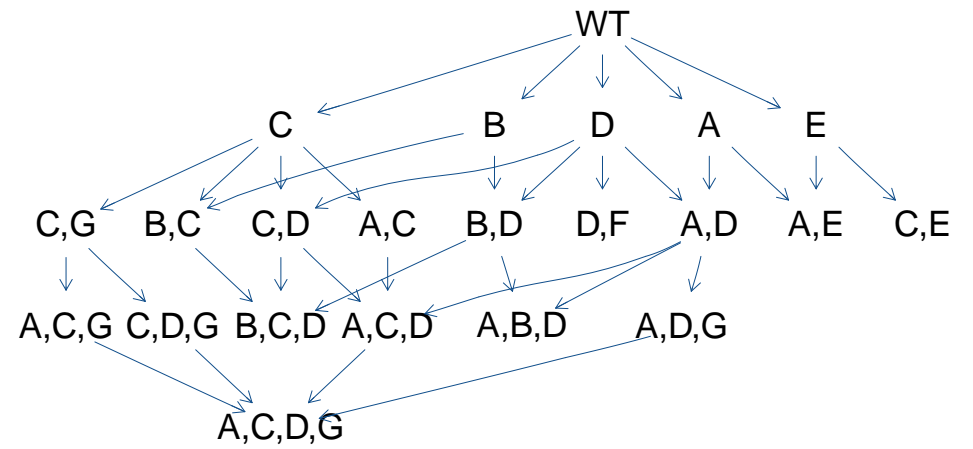

ID x63vO10FZvDdTuarD  
 acc genotypes 20  
 peaks no back 9  
 removed edges NA  
 prop rem edges NA

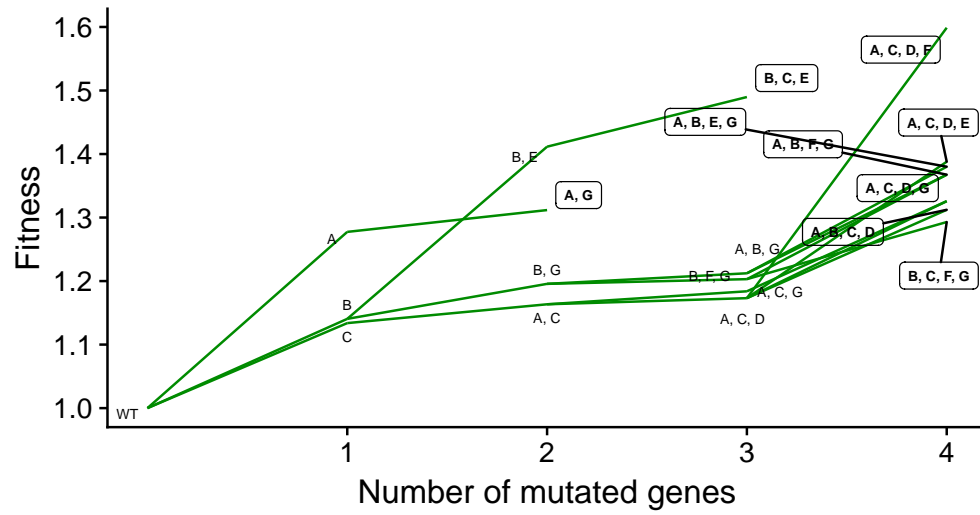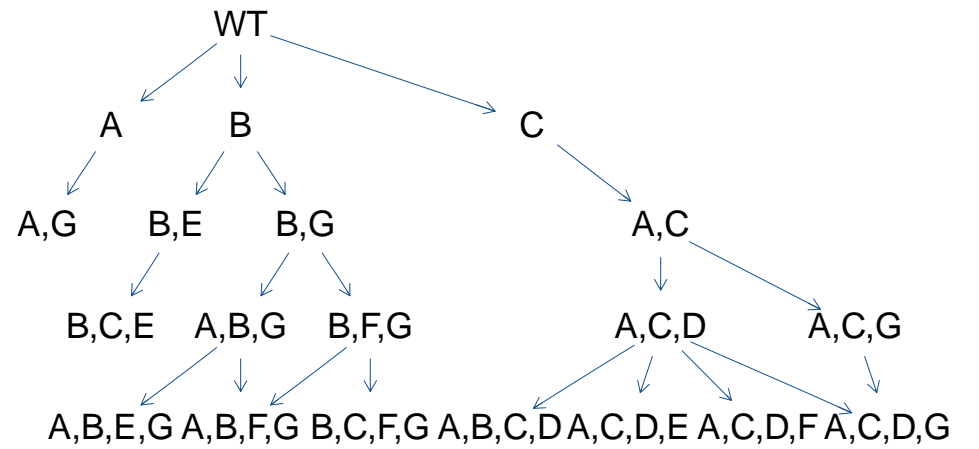



ID XhJcAoB3WdJKtP7  
 acc genotypes 55  
 peaks no back 21  
 removed edges NA  
 prop rem edges NA

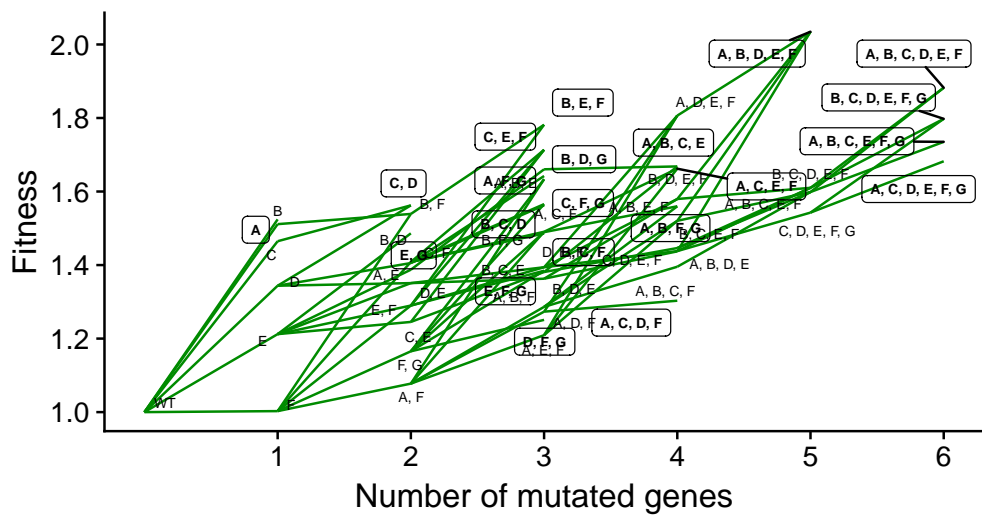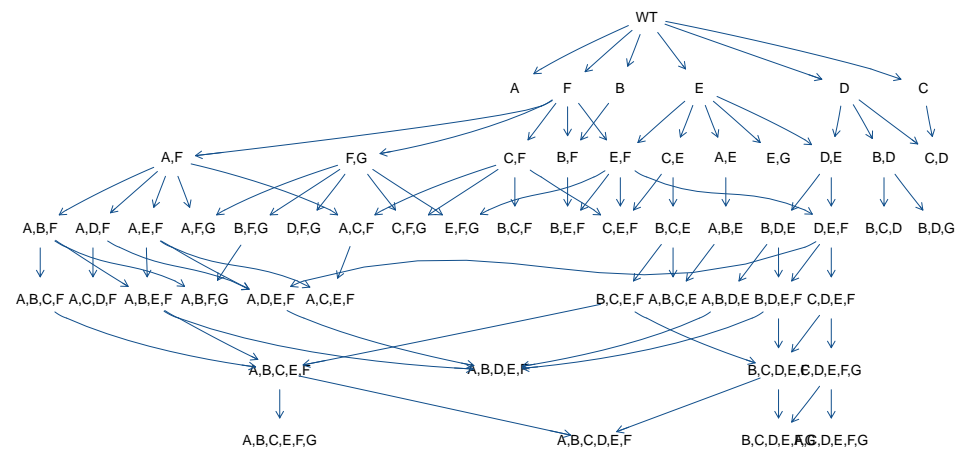

ID xp6hoPCA8glPKMzG  
 acc genotypes 62  
 peaks no back 16  
 removed edges NA  
 prop rem edges NA

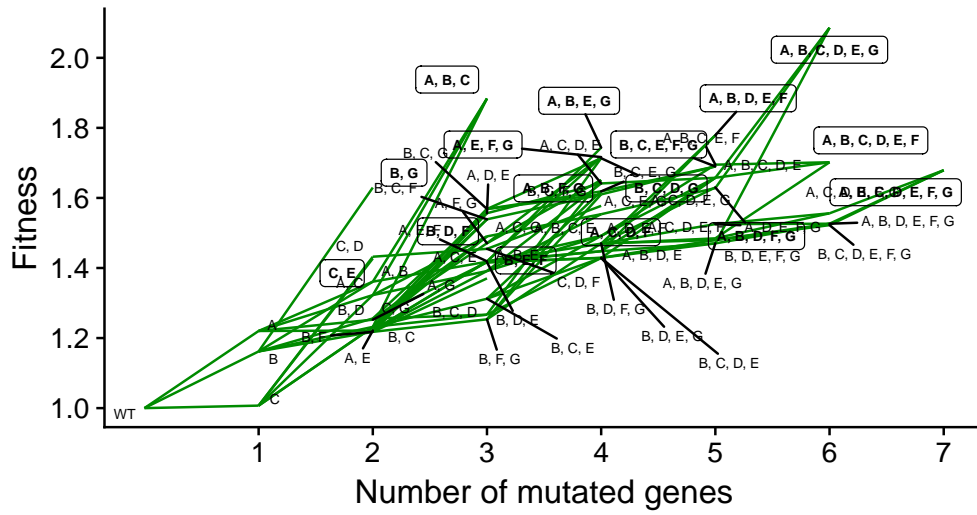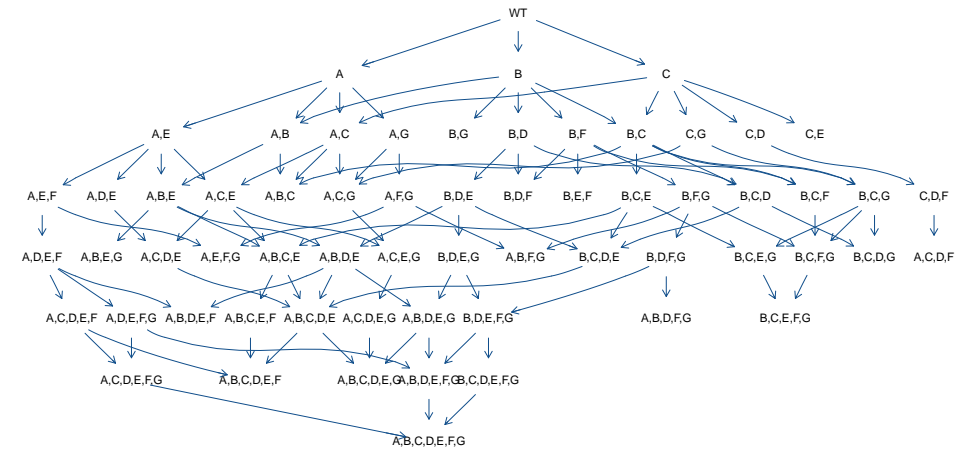

ID xU2TICTIsth9hYb3  
 acc genotypes 23  
 peaks no back 7  
 removed edges NA  
 prop rem edges NA

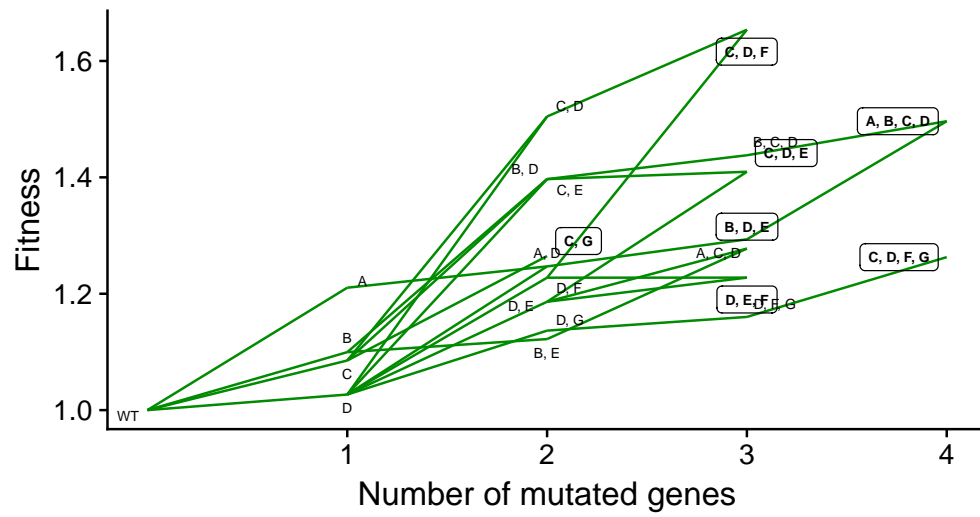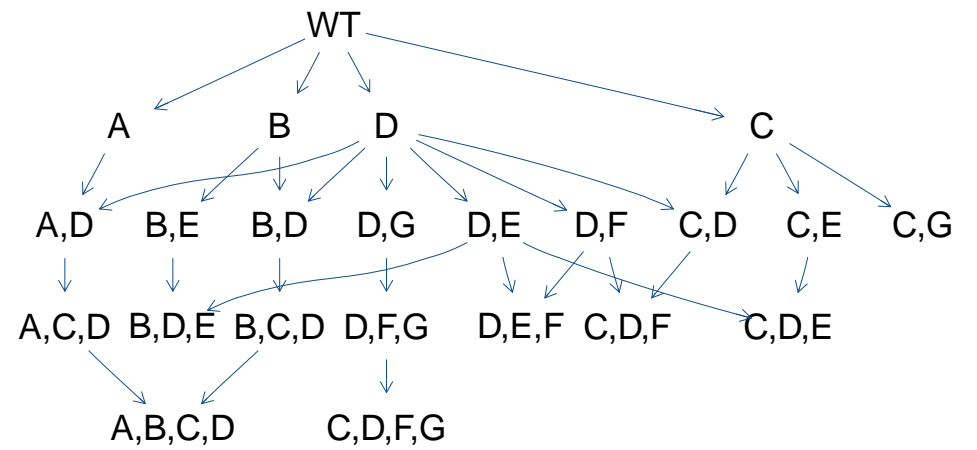

ID xZGO107xRn107k9sKc  
 acc genotypes 37  
 peaks no back 12  
 removed edges NA  
 prop rem edges NA

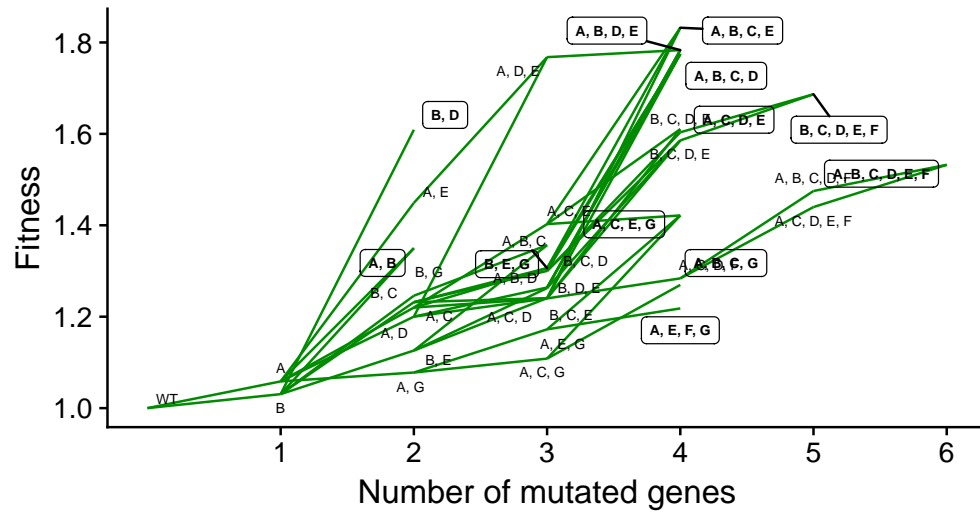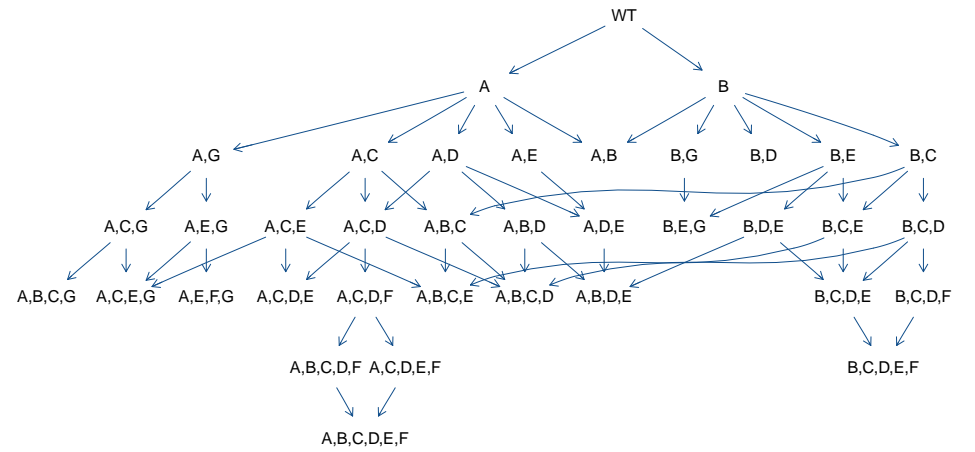

ID Y8pEslk1p3jDN3PC  
 acc genotypes 16  
 peaks no back 7  
 removed edges NA  
 prop rem edges NA

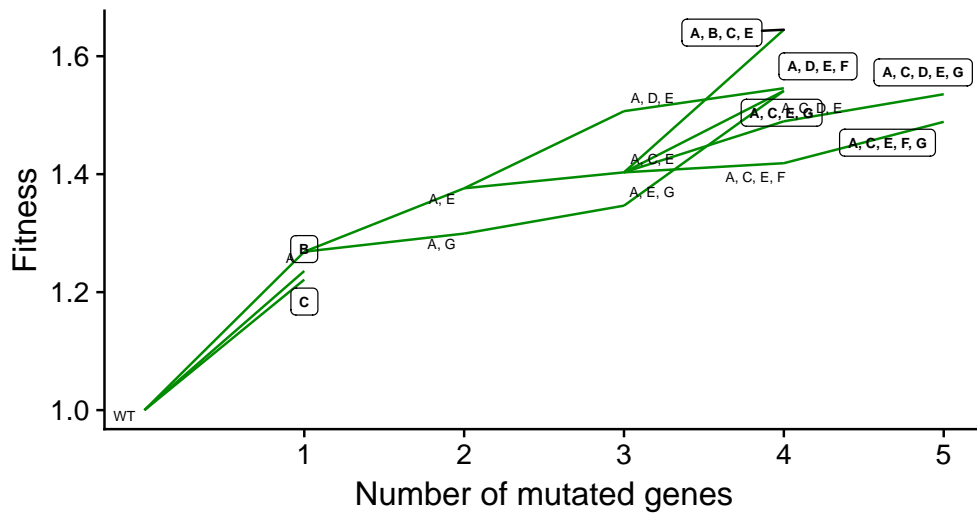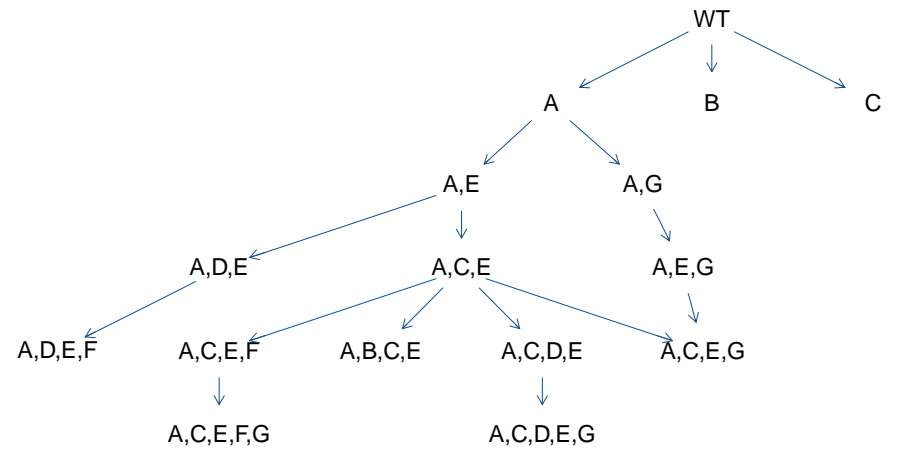

ID **yc851VadCH5z6cH10**  
 acc genotypes **30**  
 peaks no back **14**  
 removed edges **NA**  
 prop rem edges **NA**

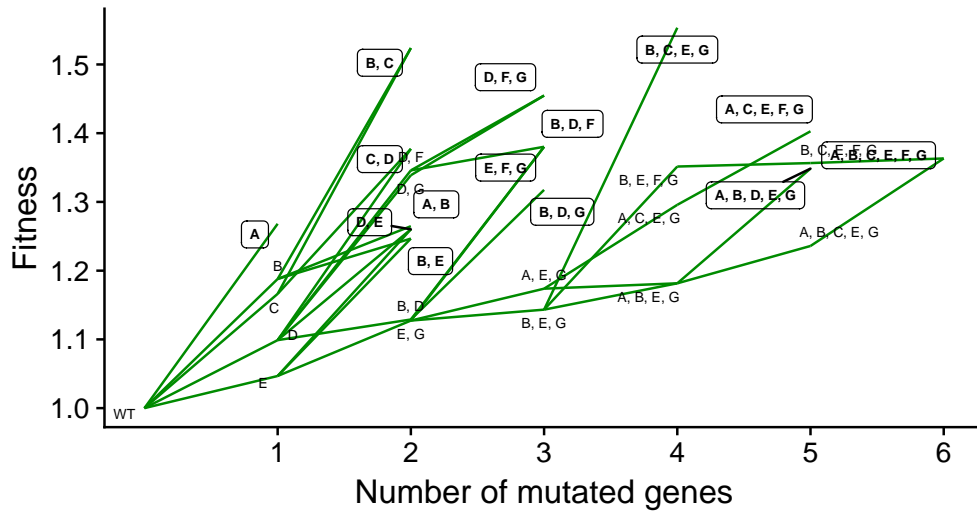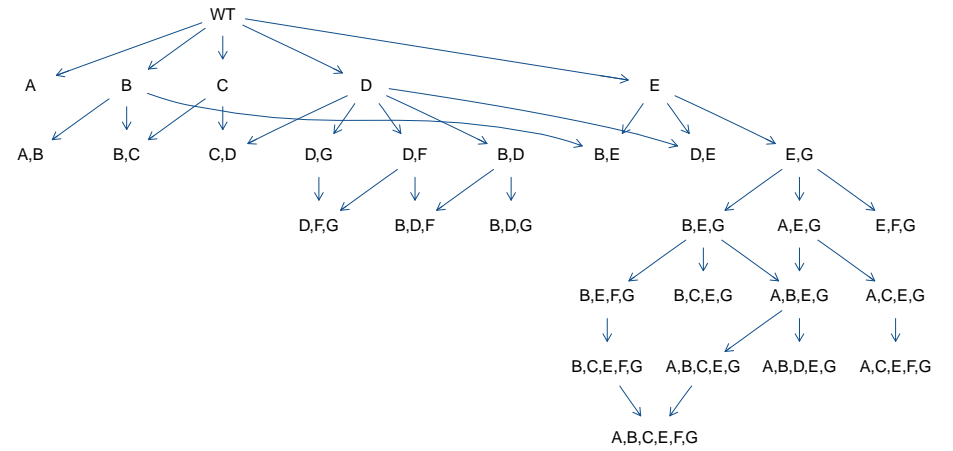

ID [yeCk19IGNHzq9Zia](#)  
 acc genotypes 44  
 peaks no back 18  
 removed edges NA  
 prop rem edges NA

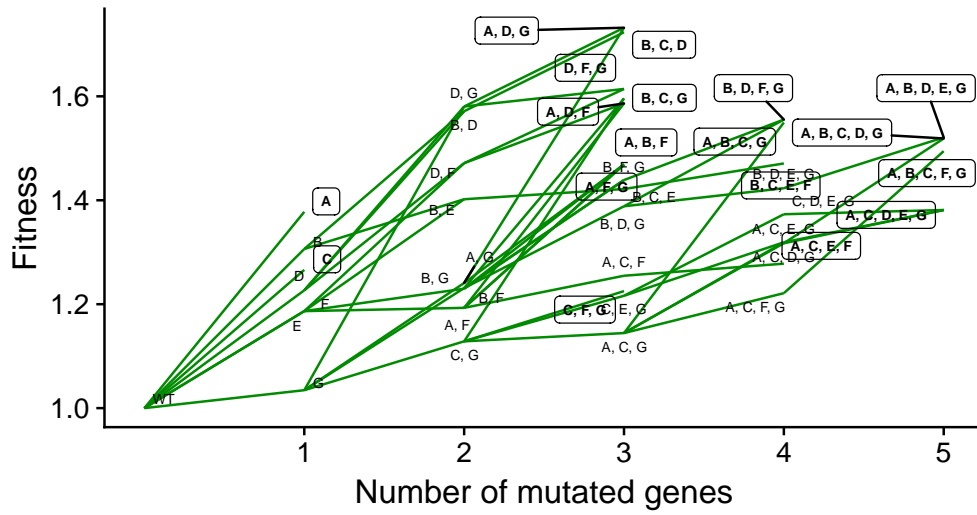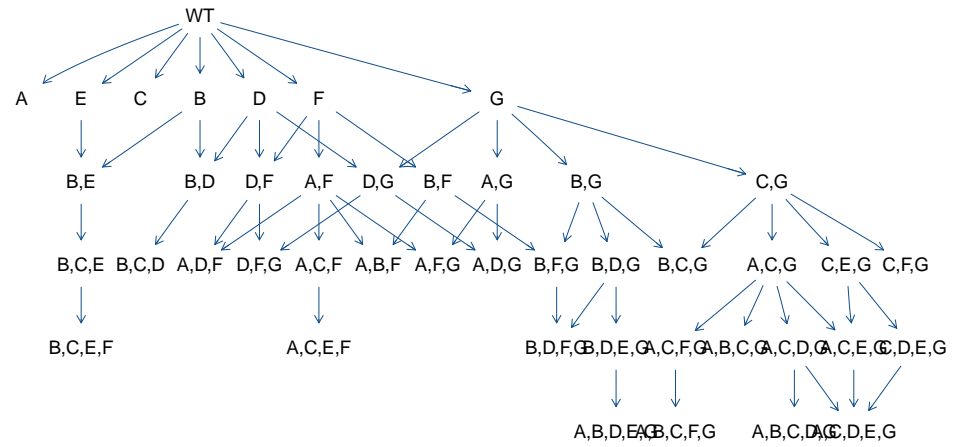

ID YpVNspihDcE5klsm  
 acc genotypes 48  
 peaks no back 12  
 removed edges NA  
 prop rem edges NA

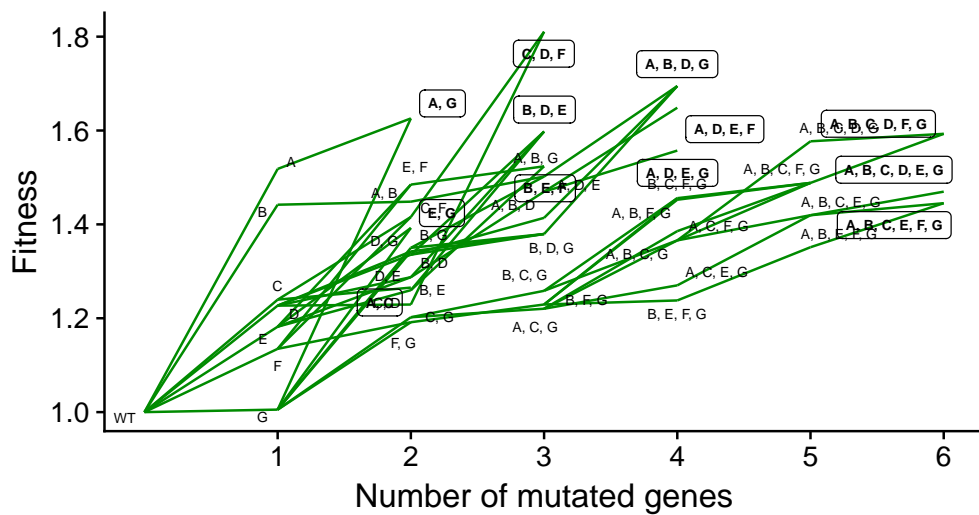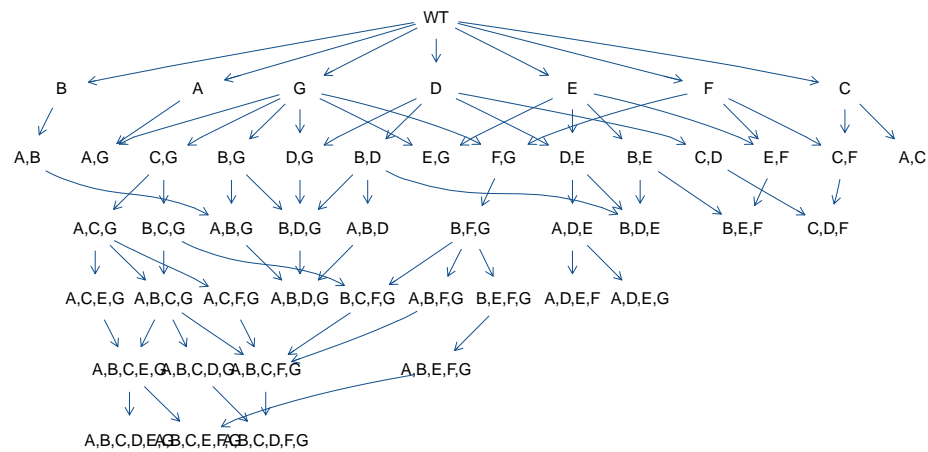



ID YuMhOqw10Xkx33JOs  
 acc genotypes 61  
 peaks no back 17  
 removed edges NA  
 prop rem edges NA

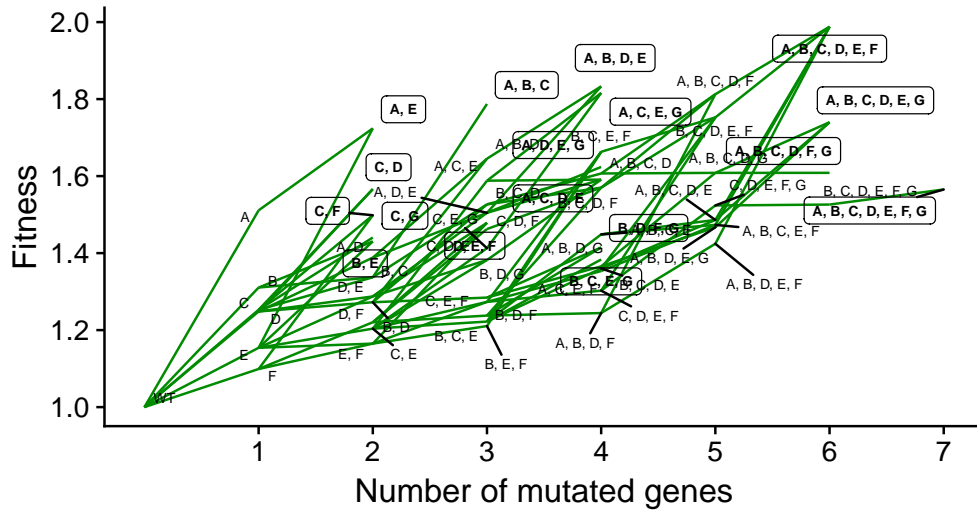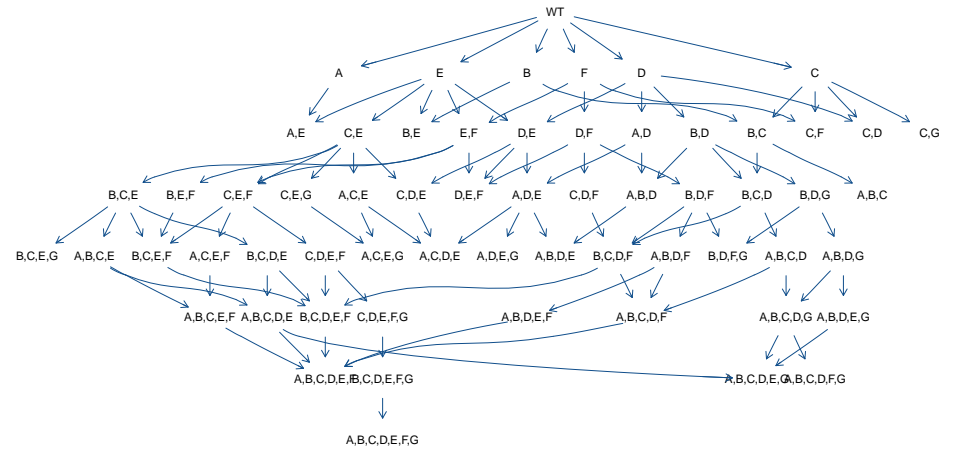

ID yYOyPKhI3NOTcbHe  
 acc genotypes 50  
 peaks no back 18  
 removed edges NA  
 prop rem edges NA

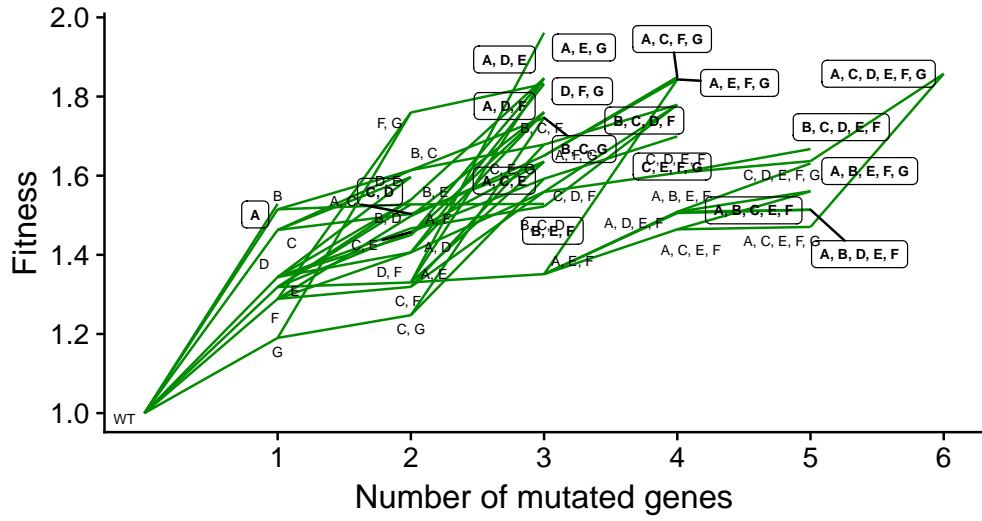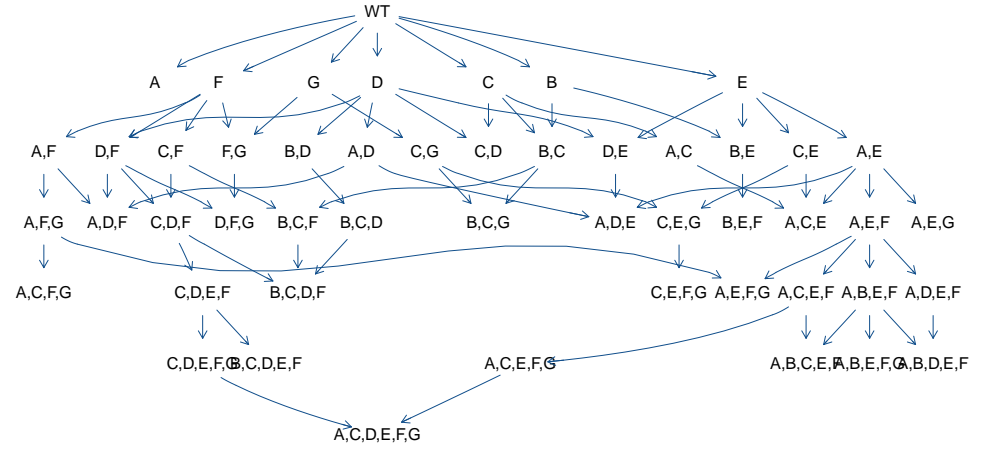

ID Z10gb2ZT22WwOQVNk  
 acc genotypes 30  
 peaks no back 12  
 removed edges NA  
 prop rem edges NA

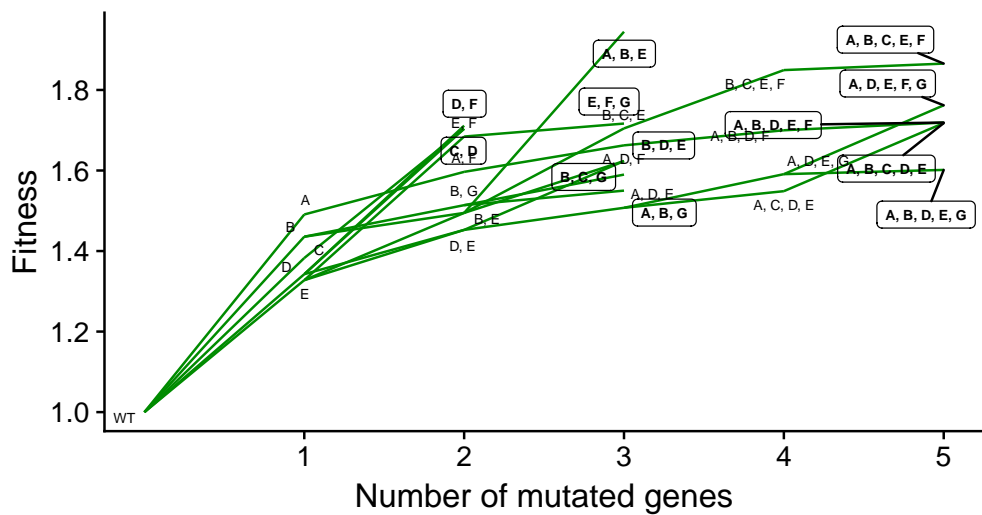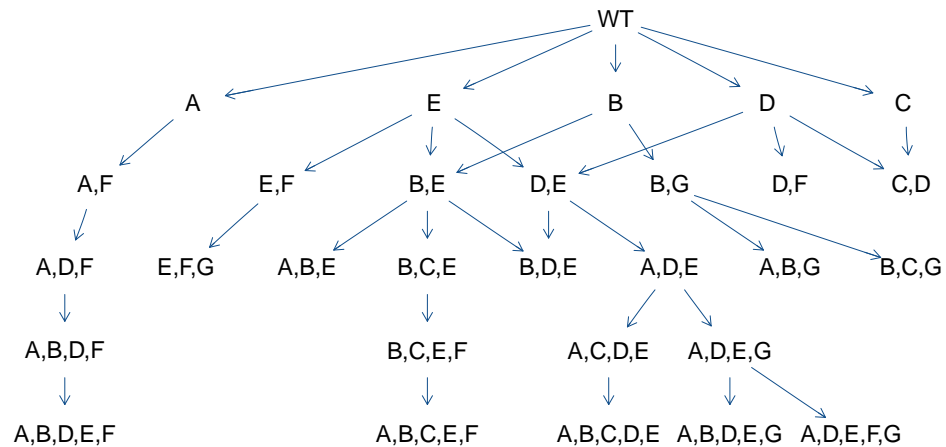

ID Z7lpusjT8G9uuSKU  
 acc genotypes 59  
 peaks no back 18  
 removed edges NA  
 prop rem edges NA

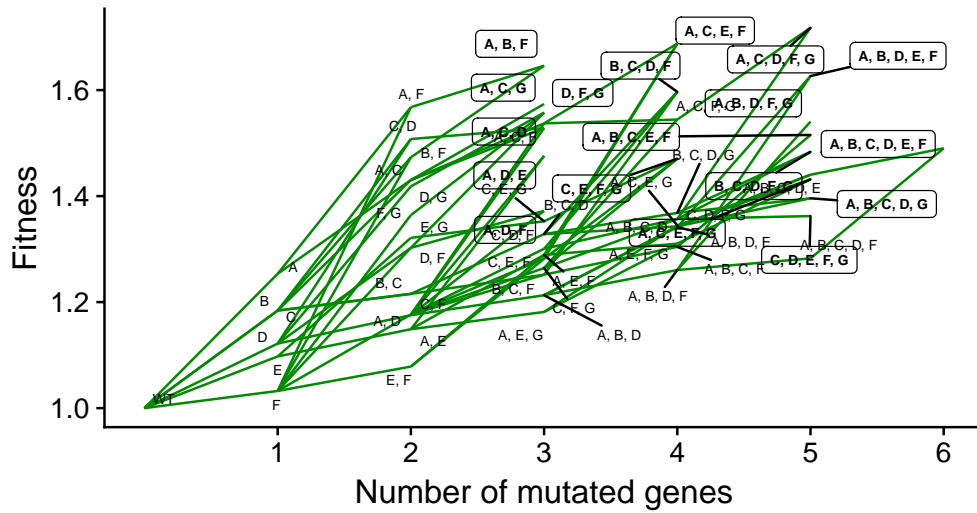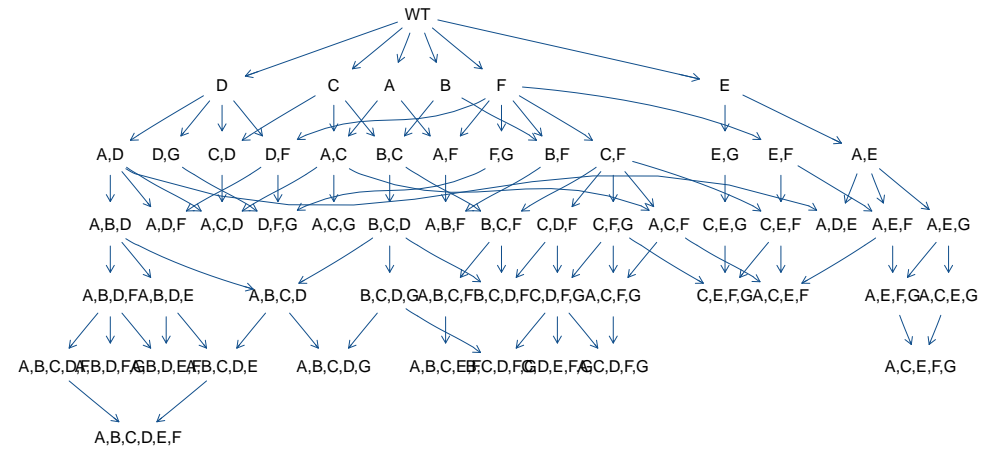

ID ZGkYkR2uDqq44mge  
 acc genotypes 34  
 peaks no back 14  
 removed edges NA  
 prop rem edges NA

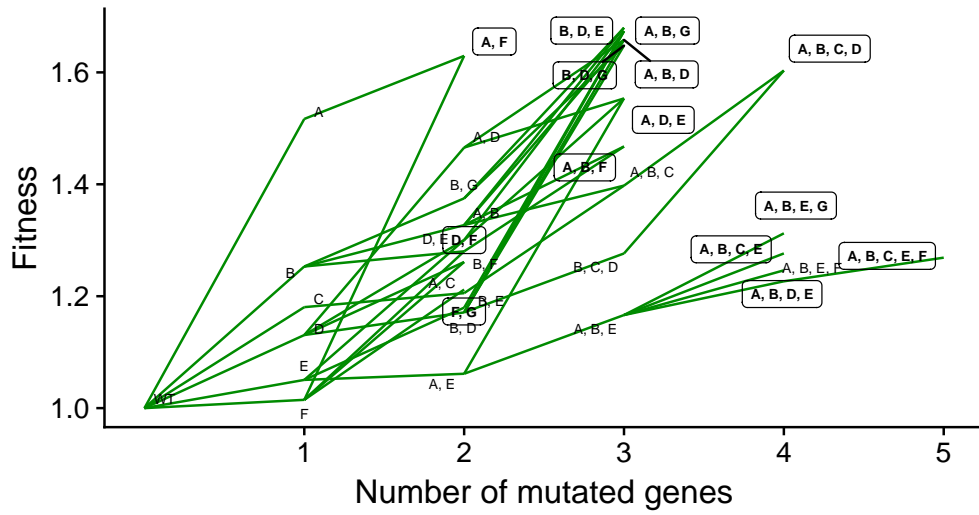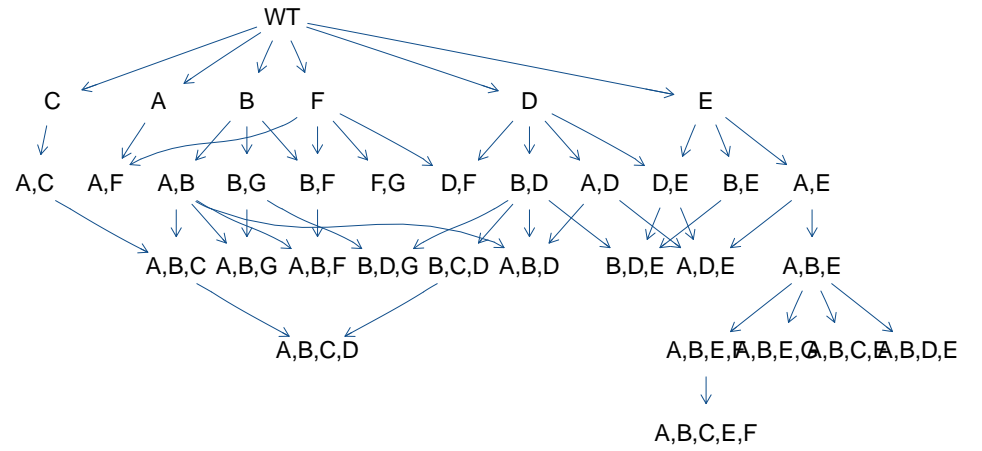



ID ZVWECQo9V7rYLRNy  
 acc genotypes 72  
 peaks no back 10  
 removed edges NA  
 prop rem edges NA

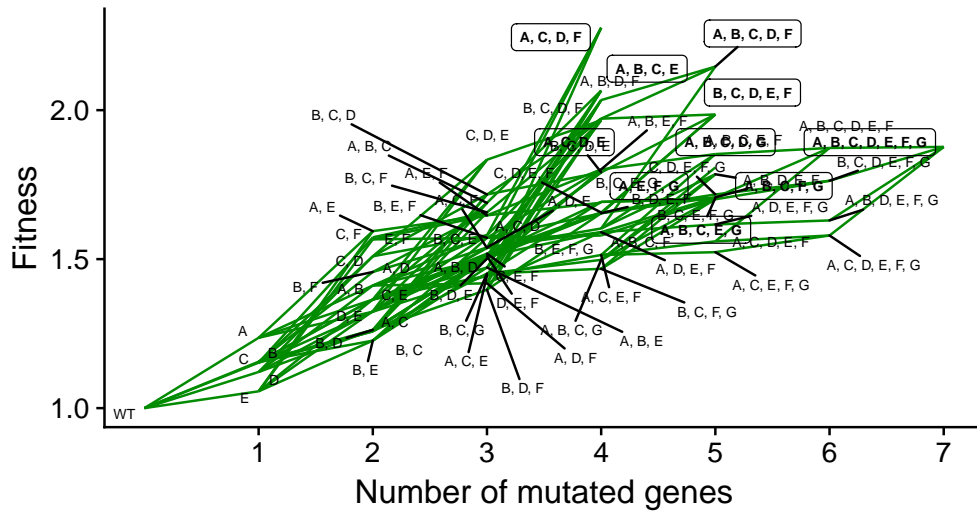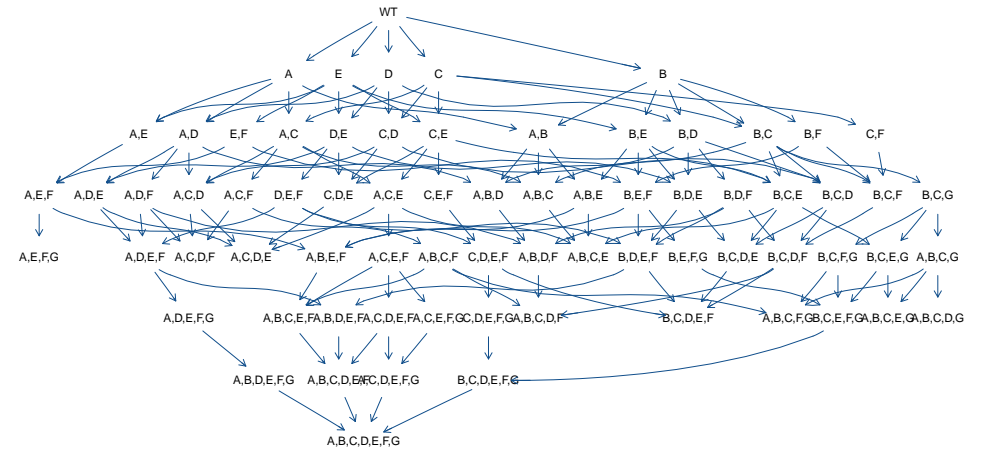

ID ZWDP3y7TKpRZUzKJ  
 acc genotypes 46  
 peaks no back 15  
 removed edges NA  
 prop rem edges NA

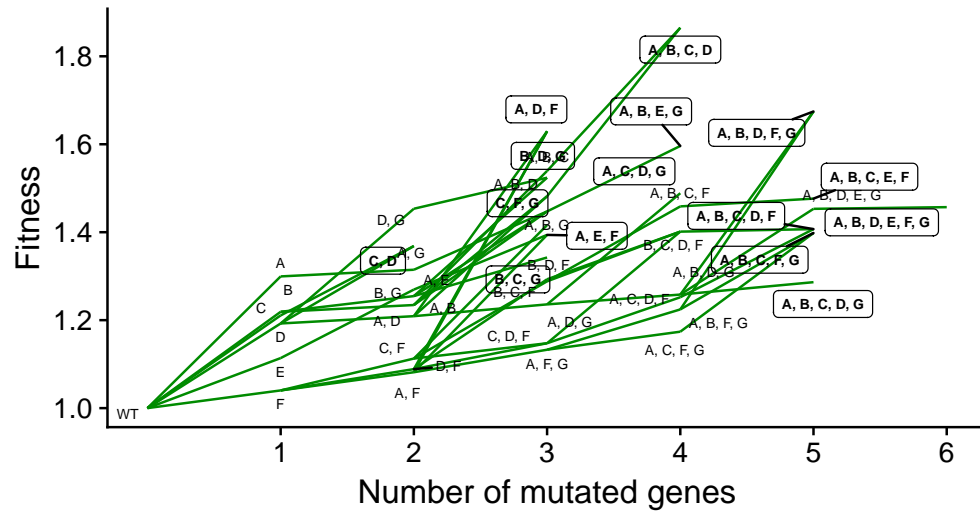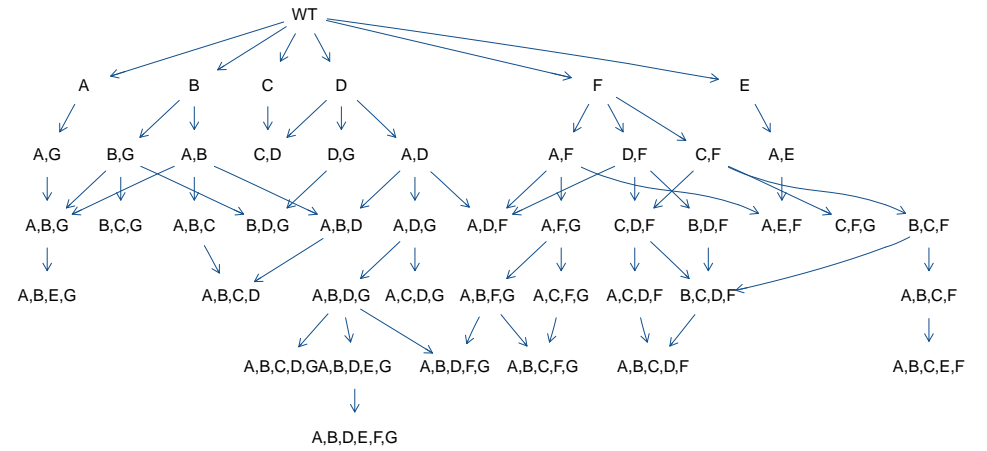



ID ZXShHtwLyLLxewaU  
 acc genotypes 51  
 peaks no back 22  
 removed edges NA  
 prop rem edges NA

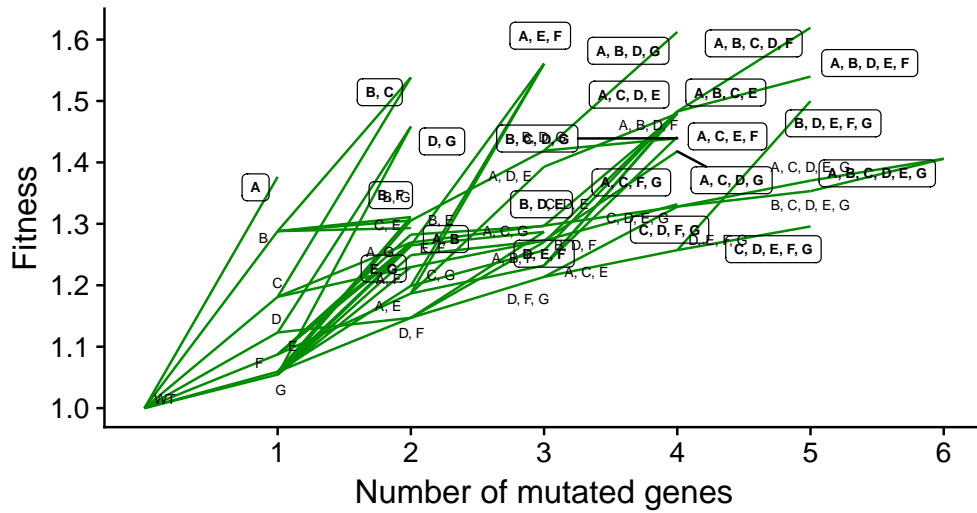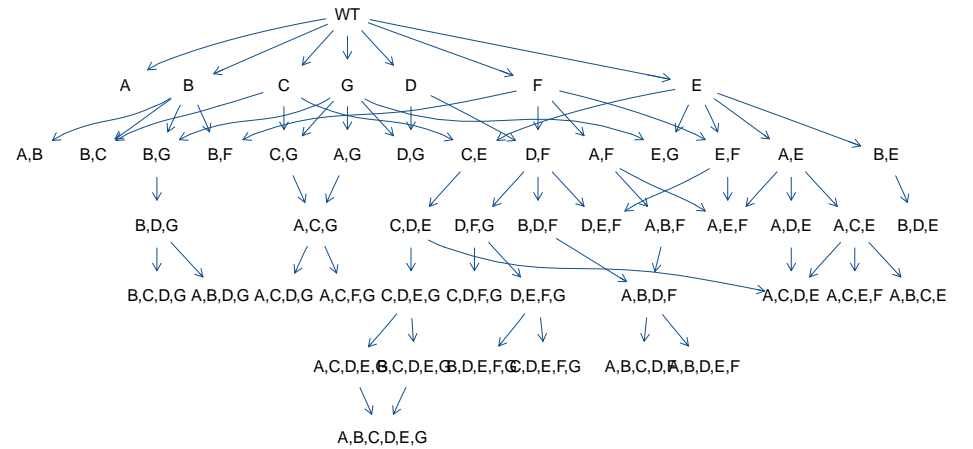

### 3. Ten genes

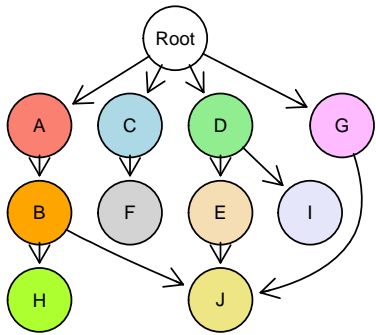

ID 10lc5x6106RnZOmZ6Z  
 acc genotypes 132  
 peaks no back 1  
 removed edges 0  
 prop rem edges 0

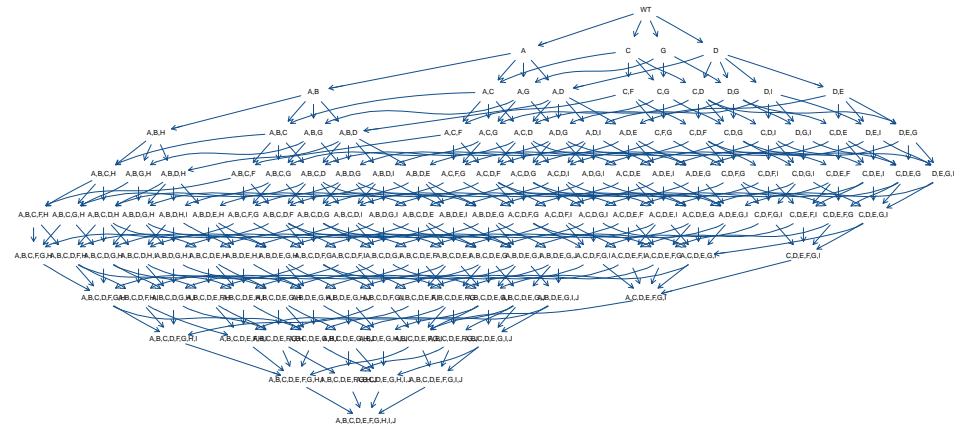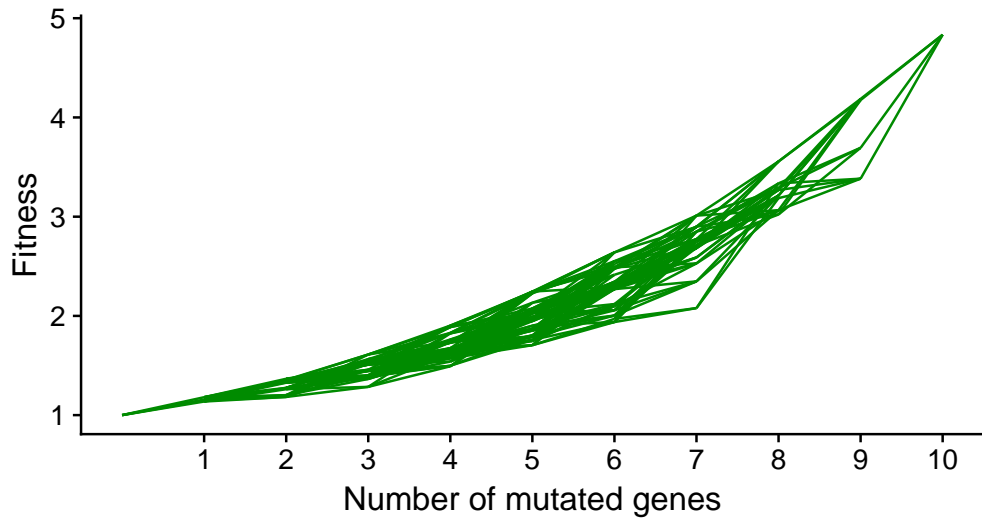

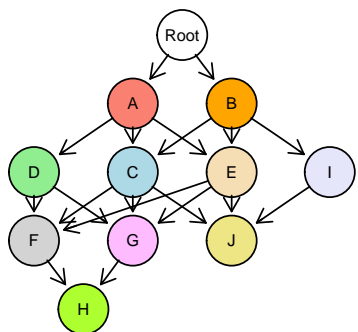

ID 10sA3fCTx7METho38  
 acc genotypes 35  
 peaks no back 1  
 removed edges 0  
 prop rem edges 0

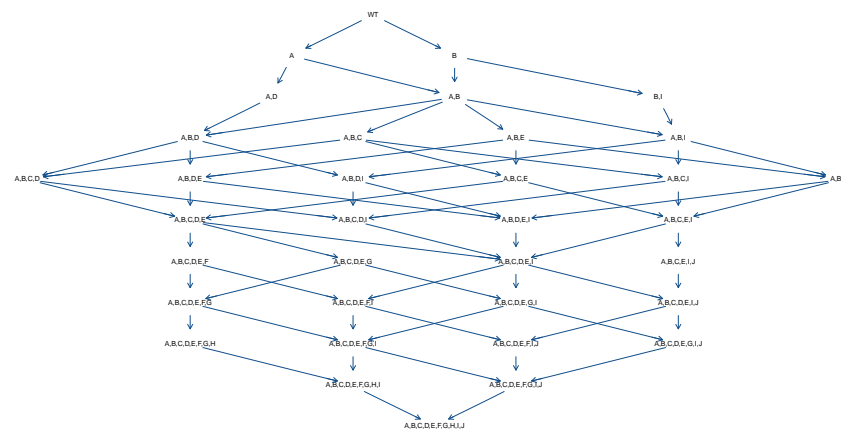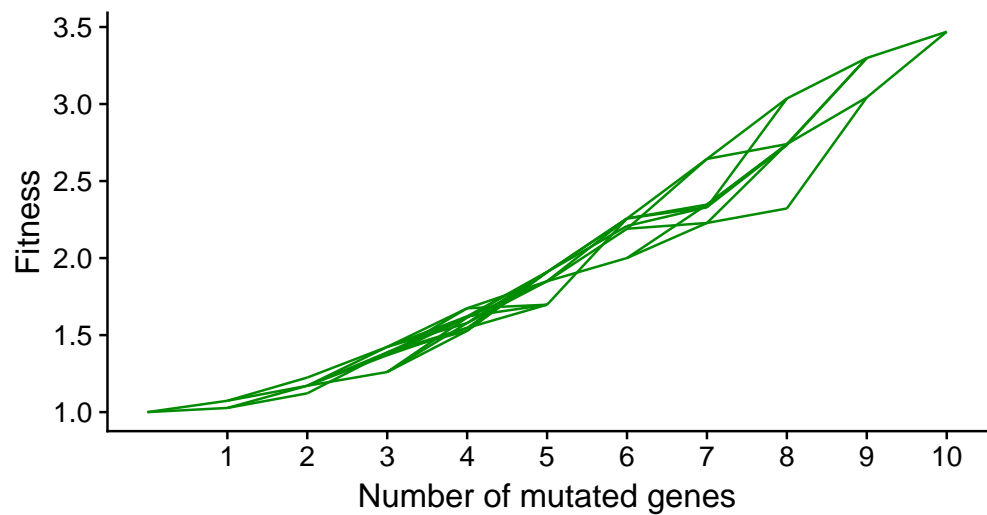

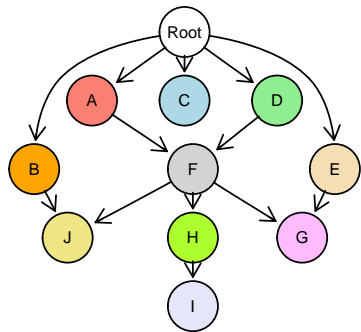

ID **1MaScdYnWRHseOZ7**  
 acc genotypes **86**  
 peaks no back **1**  
 removed edges **0**  
 prop rem edges **0**

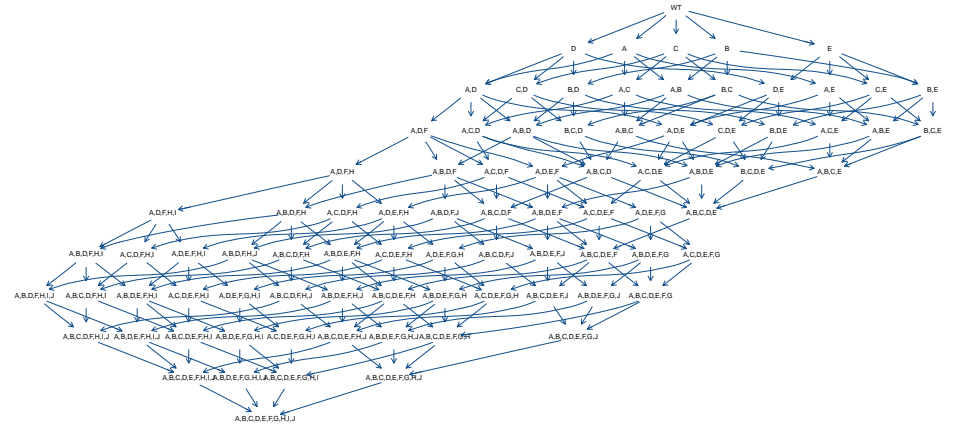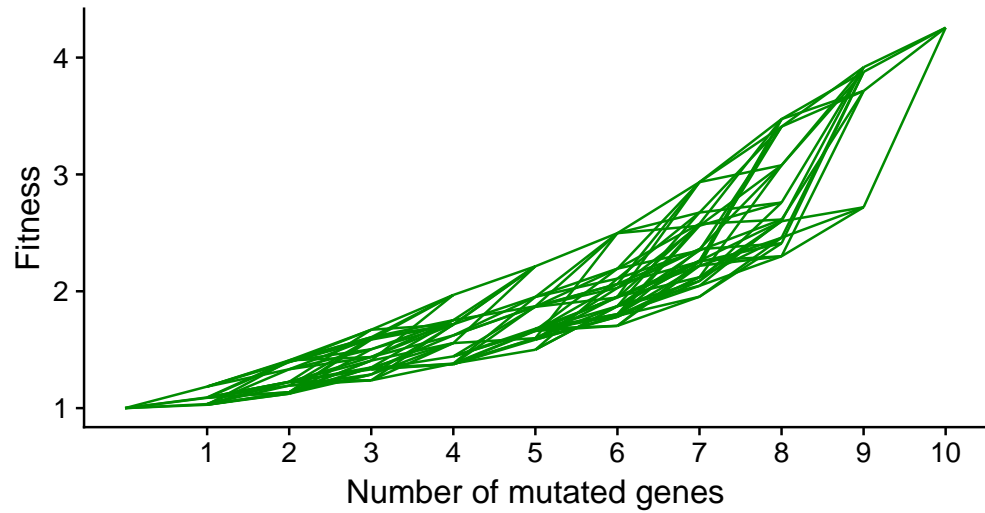

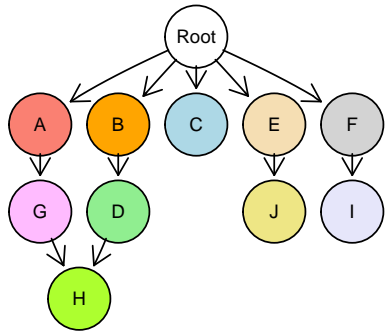

ID 1N11Lbu3EuEdbw8  
 acc genotypes 180  
 peaks no back 1  
 removed edges 0  
 prop rem edges 0

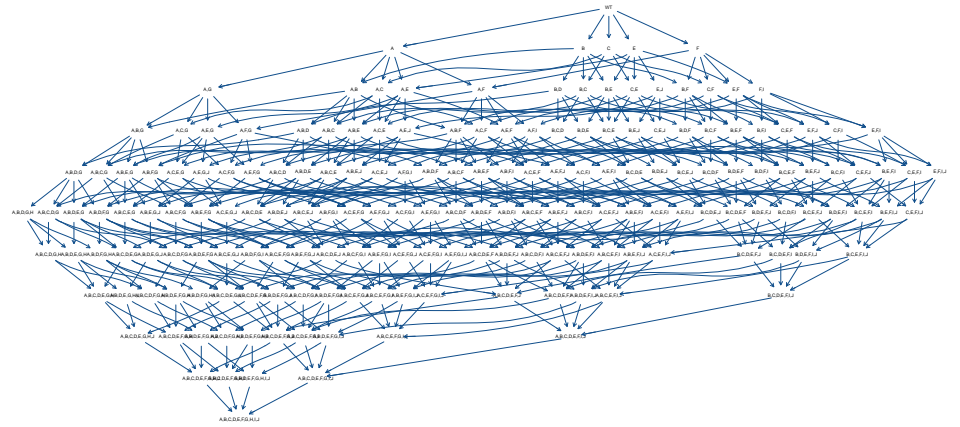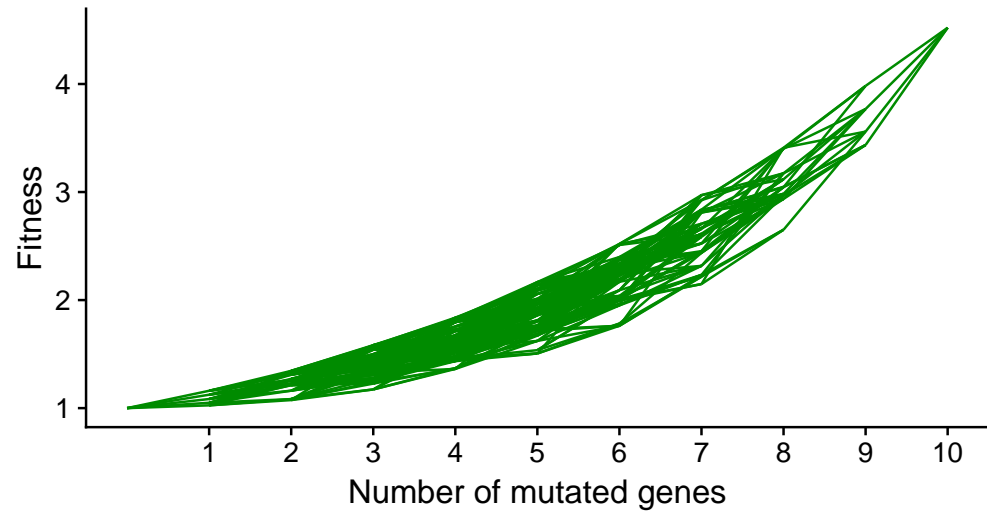

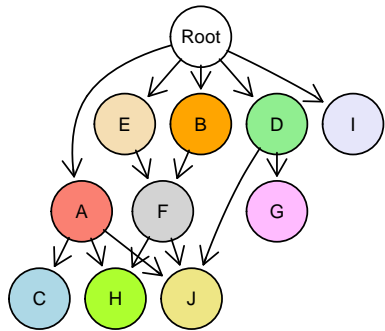

ID 2PhVbwXtsibgHoCR  
 acc genotypes 118  
 peaks no back 1  
 removed edges 0  
 prop rem edges 0

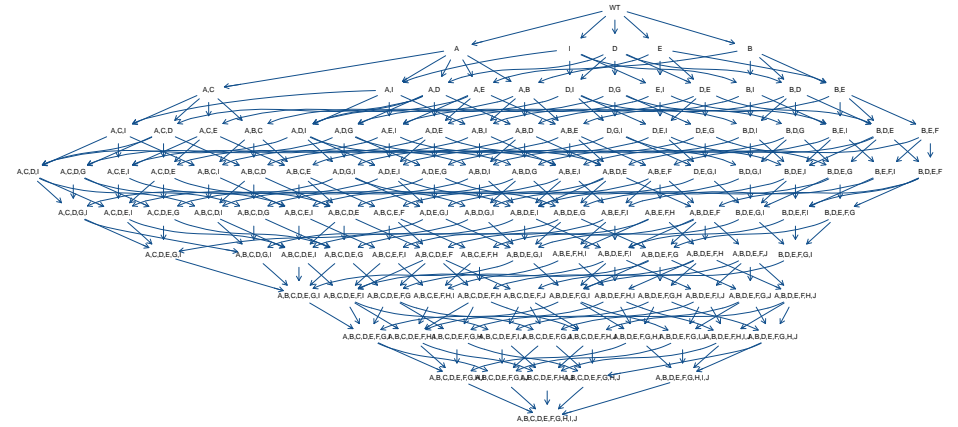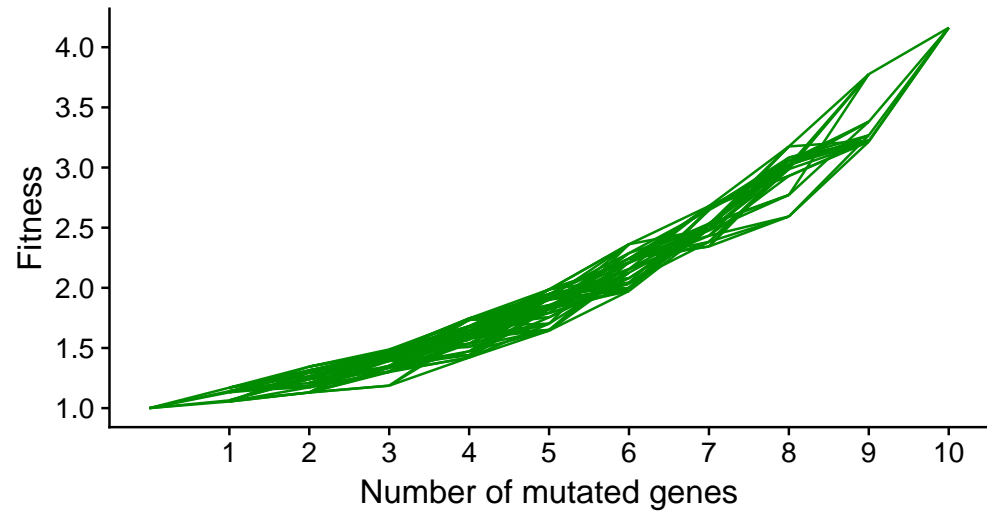

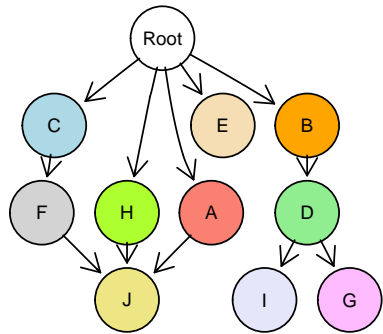

ID 2QFqp77NSVxKUuRw  
 acc genotypes 156  
 peaks no back 1  
 removed edges 0  
 prop rem edges 0

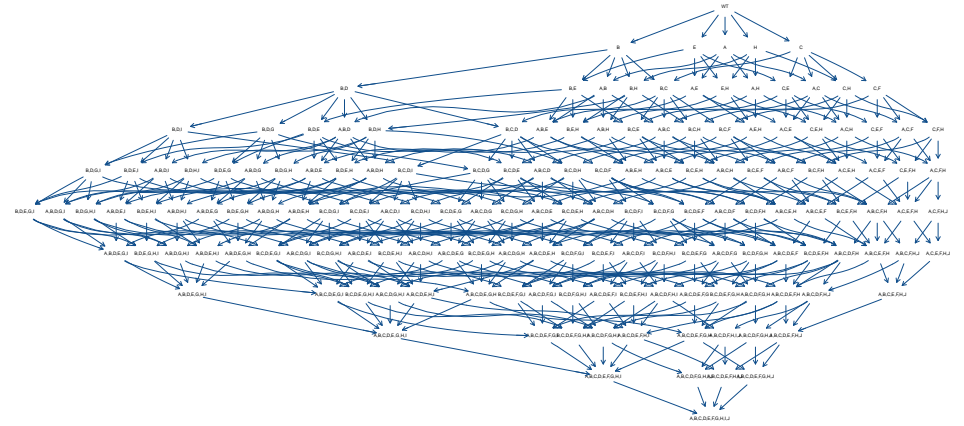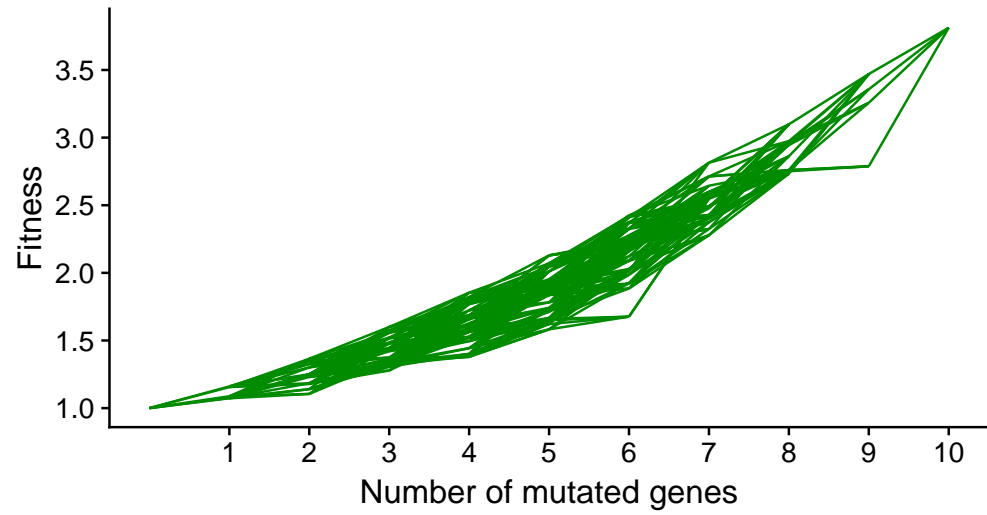



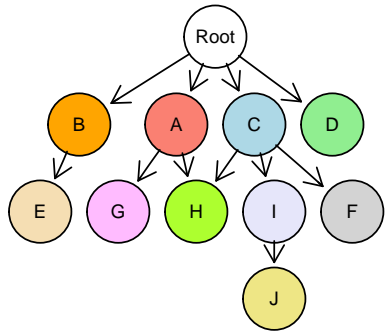

ID **3LaNuAy8eWU4GMwm**  
 acc genotypes **198**  
 peaks no back 1  
 removed edges 0  
 prop rem edges 0

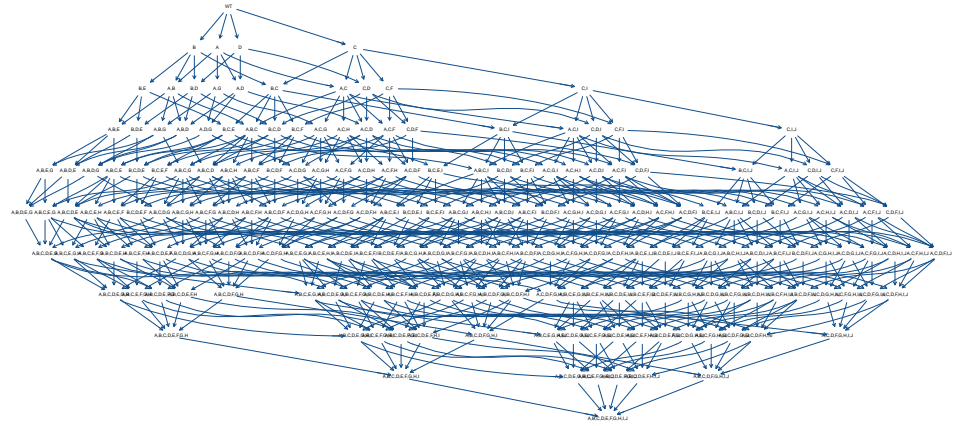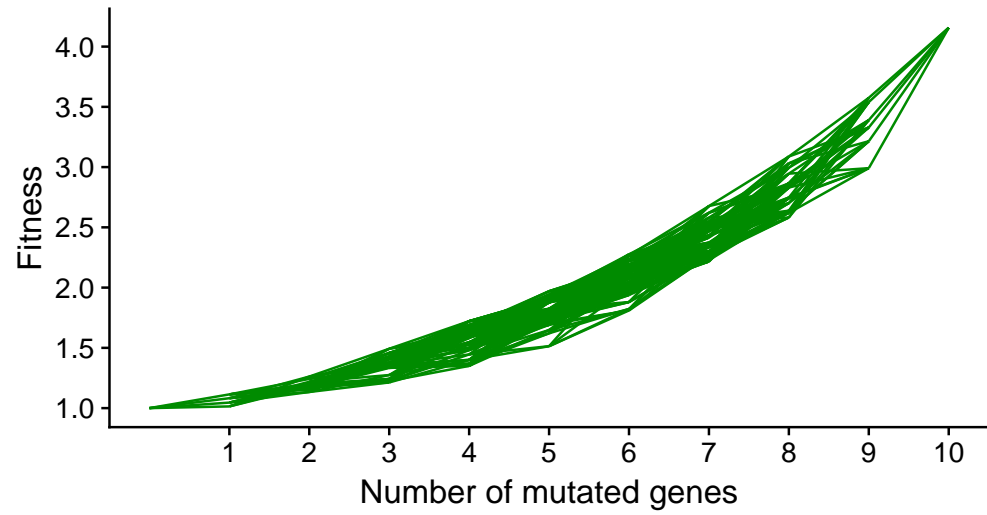

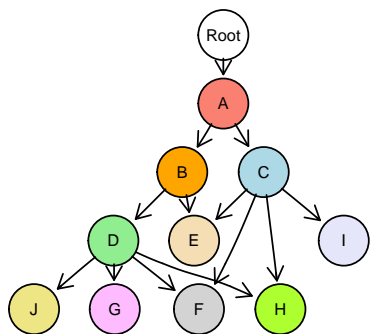

ID 3qwCINpvS1TW6yT3  
 acc genotypes 77  
 peaks no back 1  
 removed edges 0  
 prop rem edges 0

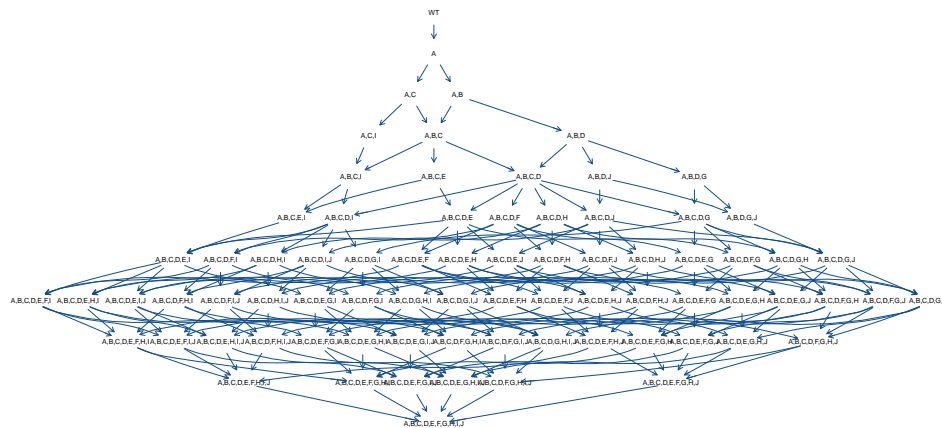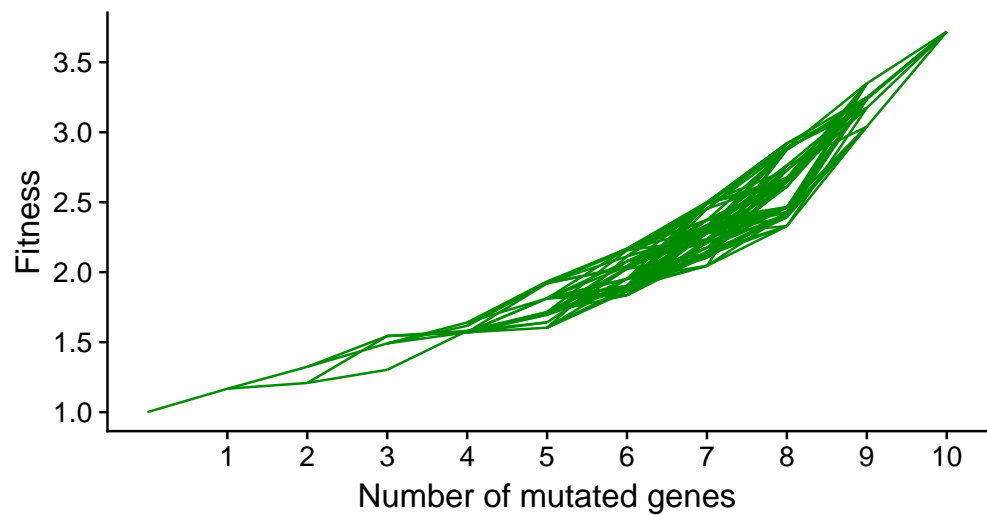

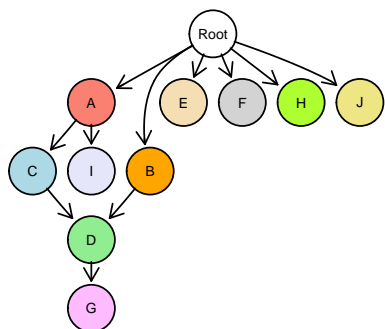

ID 3wRHh10MSegWf4SVc  
 acc genotypes 224  
 peaks no back 1  
 removed edges 0  
 prop rem edges 0

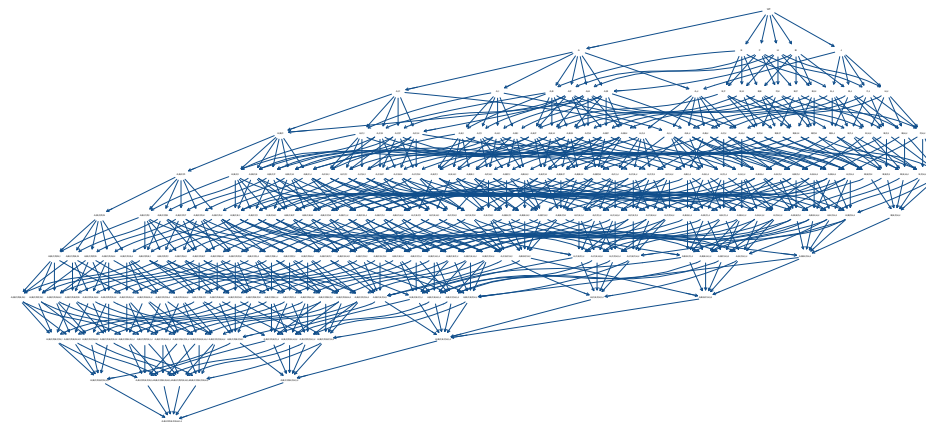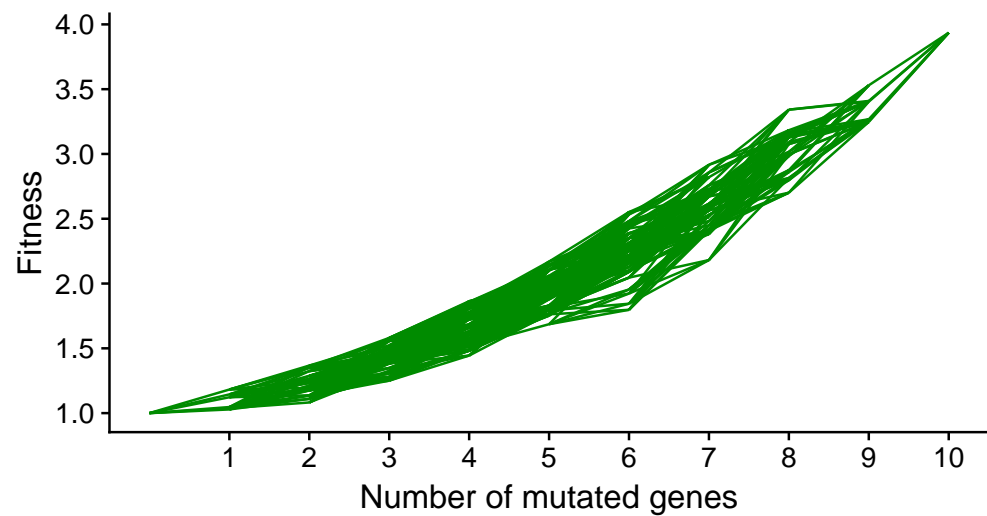

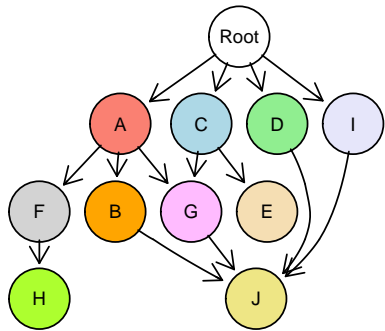

ID 3xUzonJpTvNpS9cY  
 acc genotypes 138  
 peaks no back 1  
 removed edges 0  
 prop rem edges 0

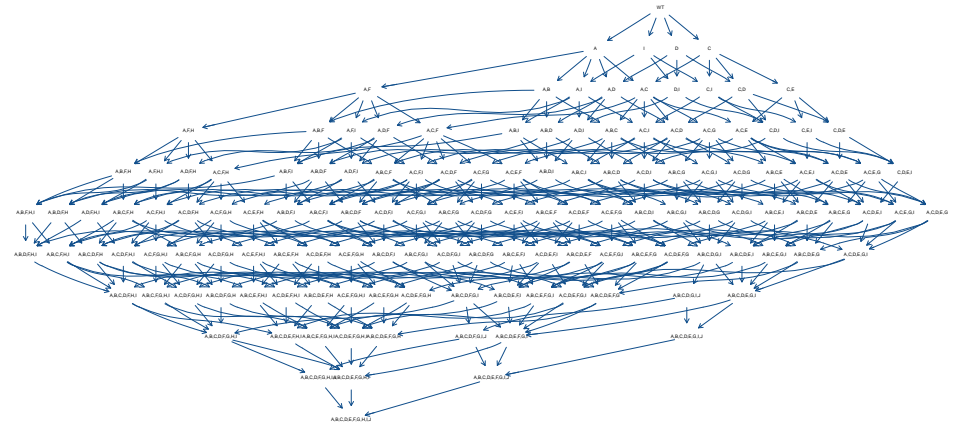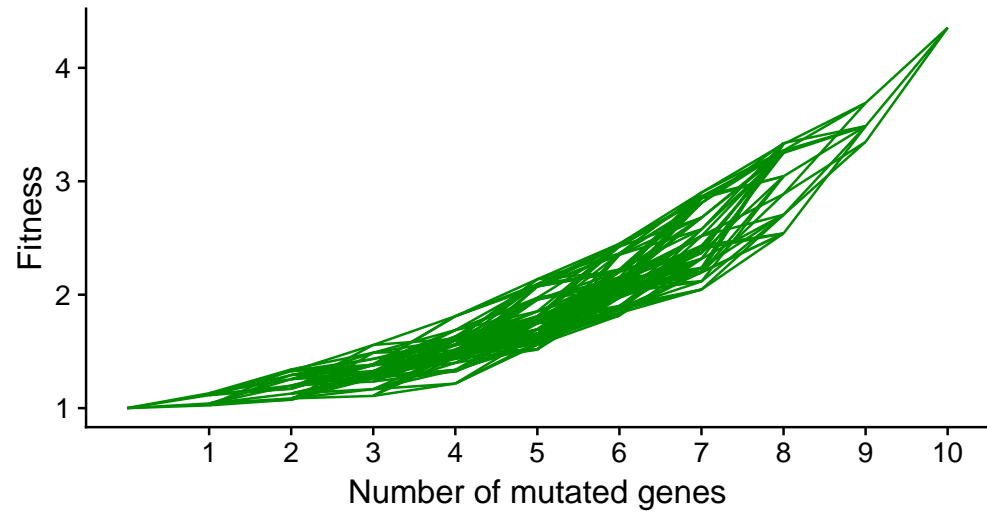

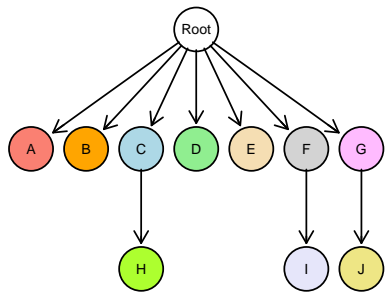

ID [41wj4xc10jq6tByv](#)  
 acc genotypes **432**  
 peaks no back 1  
 removed edges 0  
 prop rem edges 0

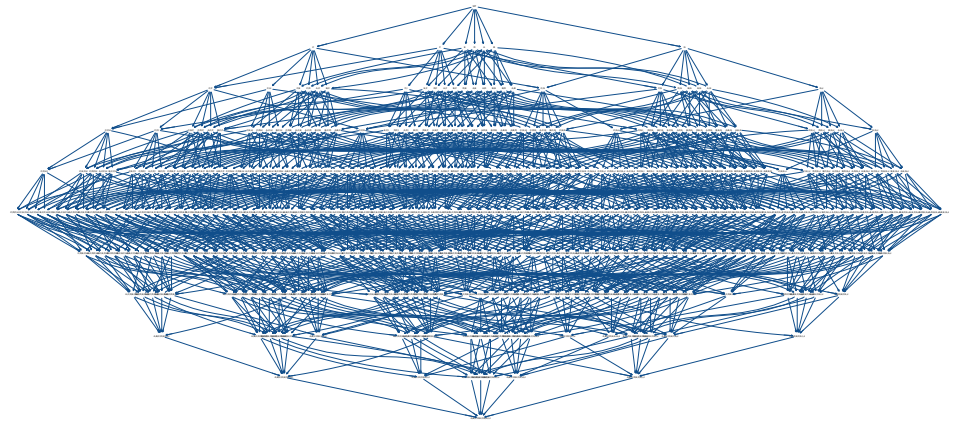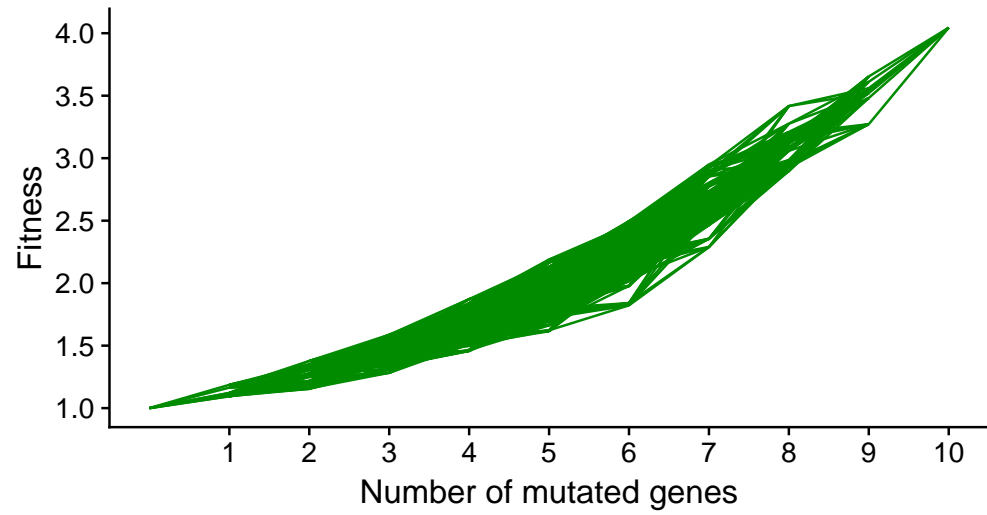

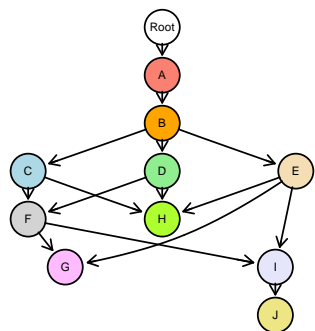

ID 43e2wOk4101CSHhe7  
 acc genotypes 24  
 peaks no back 1  
 removed edges 0  
 prop rem edges 0

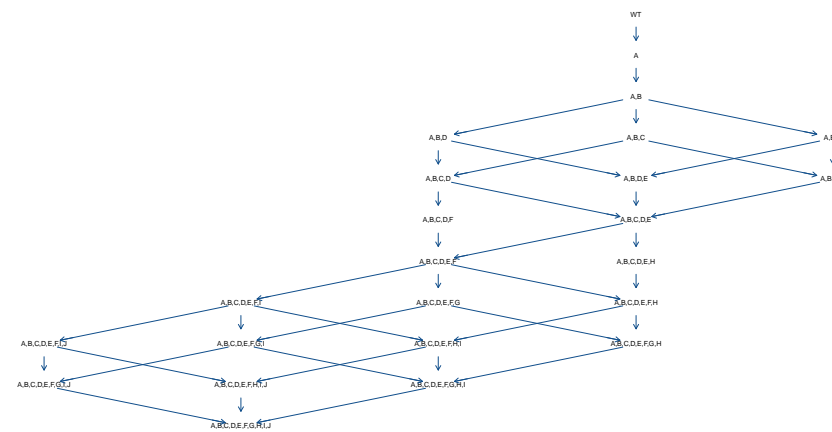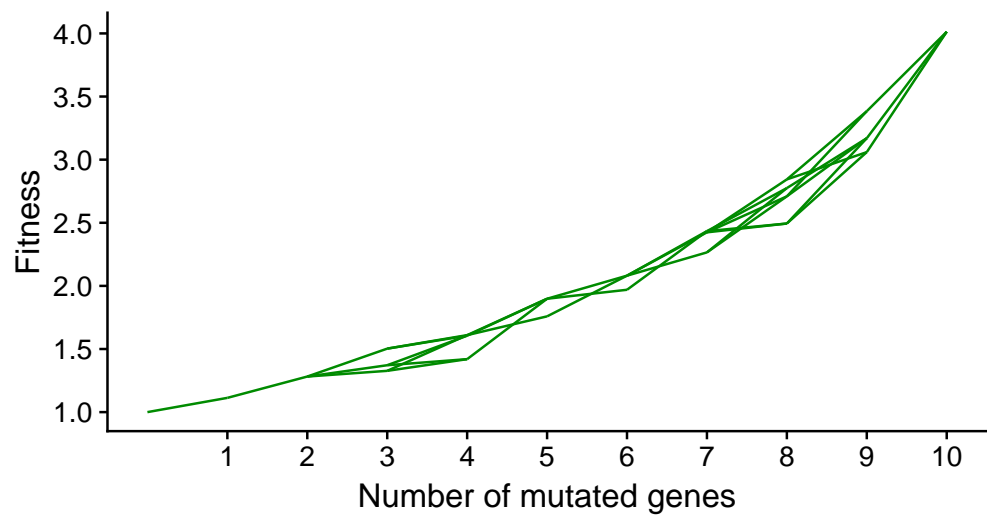

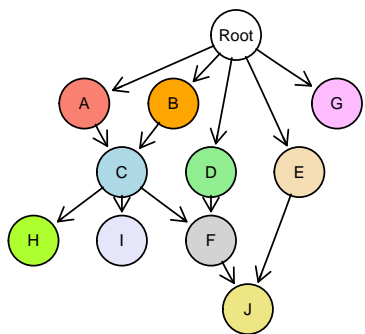

ID 45ZtV5kGH2lwAPAq  
 acc genotypes 88  
 peaks no back 1  
 removed edges 0  
 prop rem edges 0

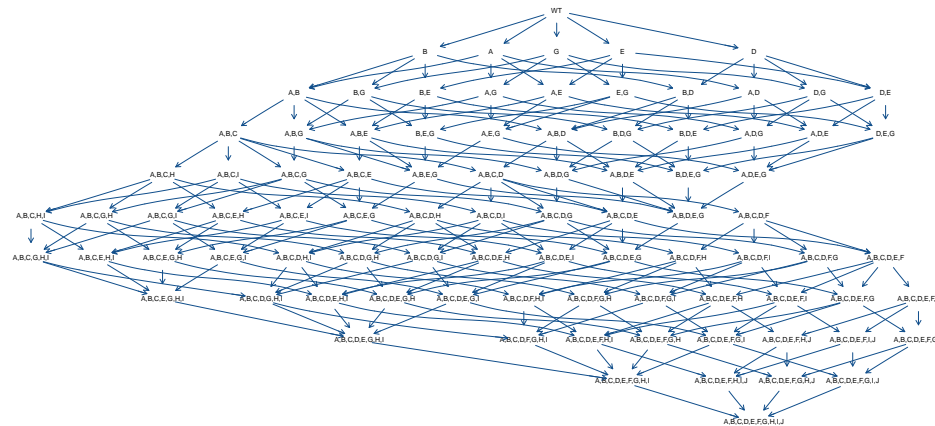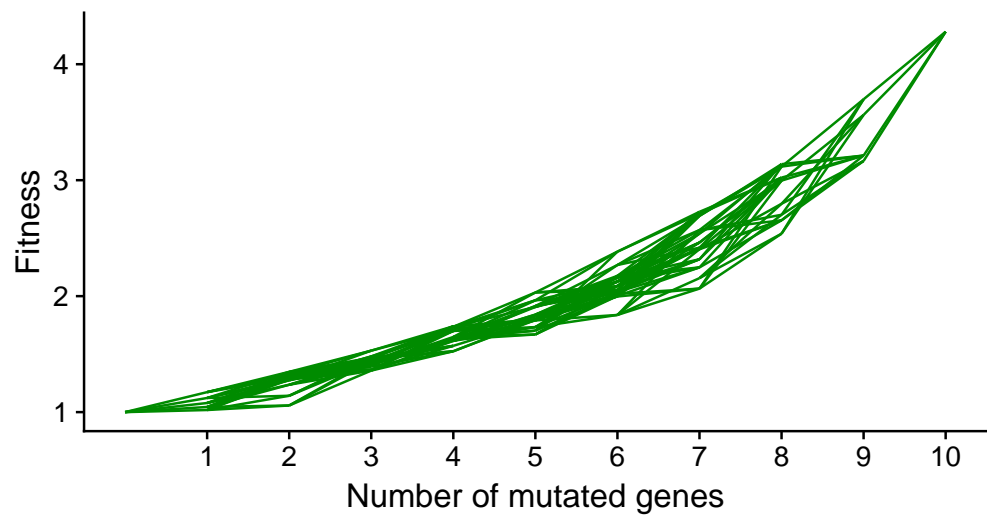

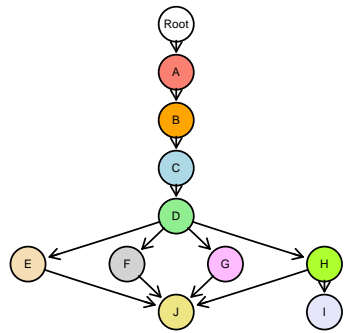

ID 510skollHNus2jjBB  
 acc genotypes 30  
 peaks no back 1  
 removed edges 0  
 prop rem edges 0

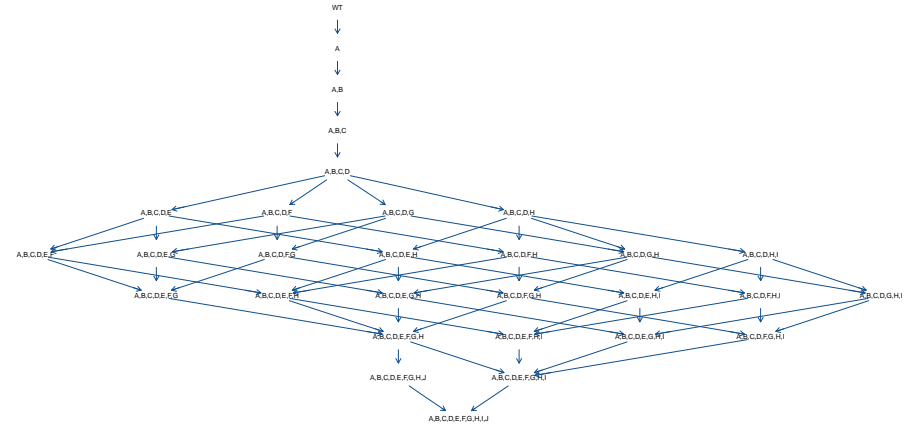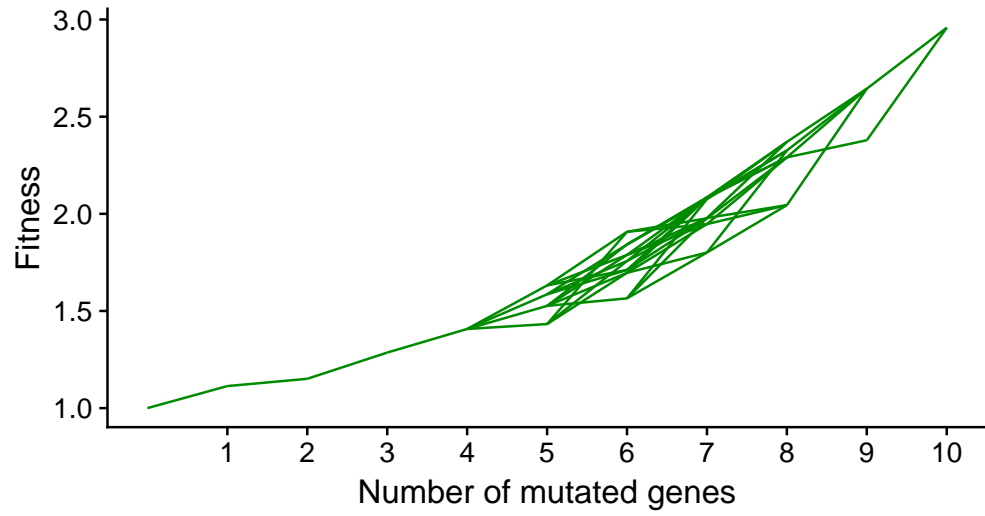



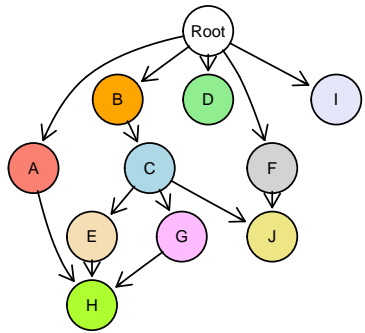

ID 56QJuQAd106HujMS5  
 acc genotypes 140  
 peaks no back 1  
 removed edges 0  
 prop rem edges 0

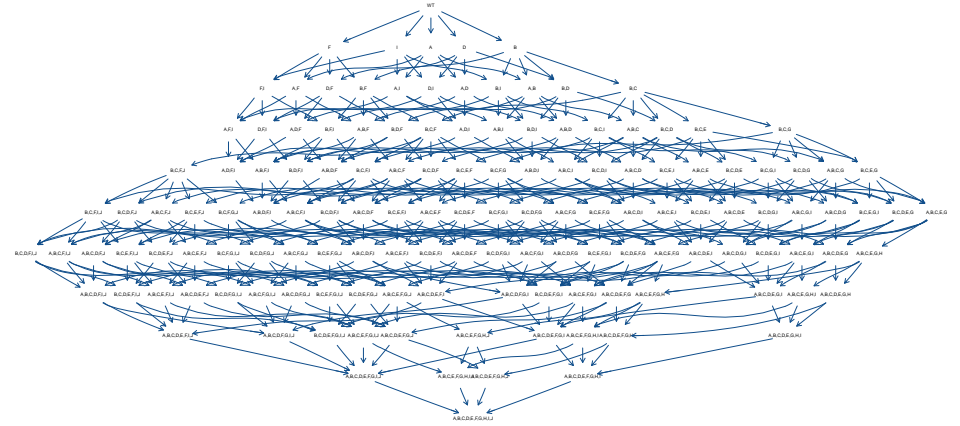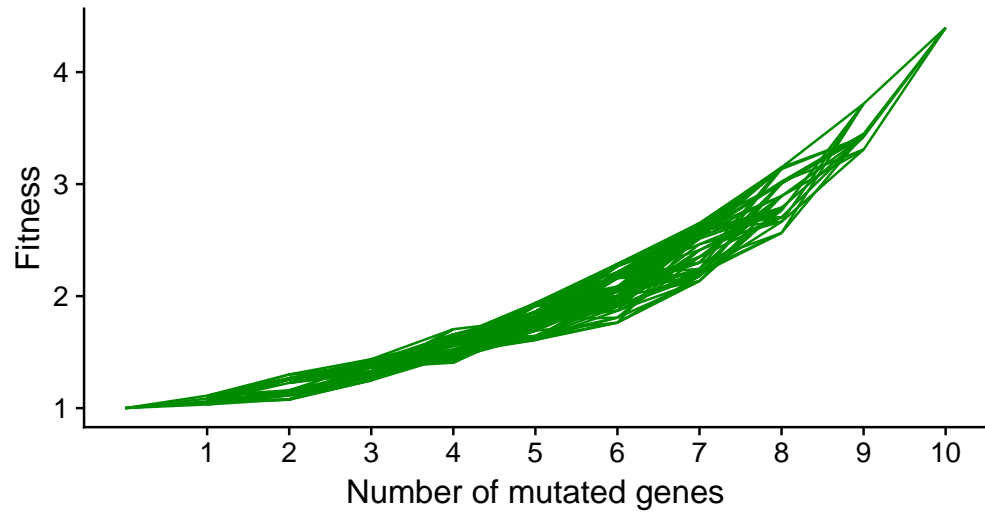

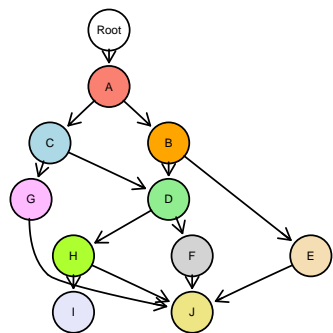

ID 59d4W3MnYvIGCNDg  
 acc genotypes 36  
 peaks no back 1  
 removed edges 0  
 prop rem edges 0

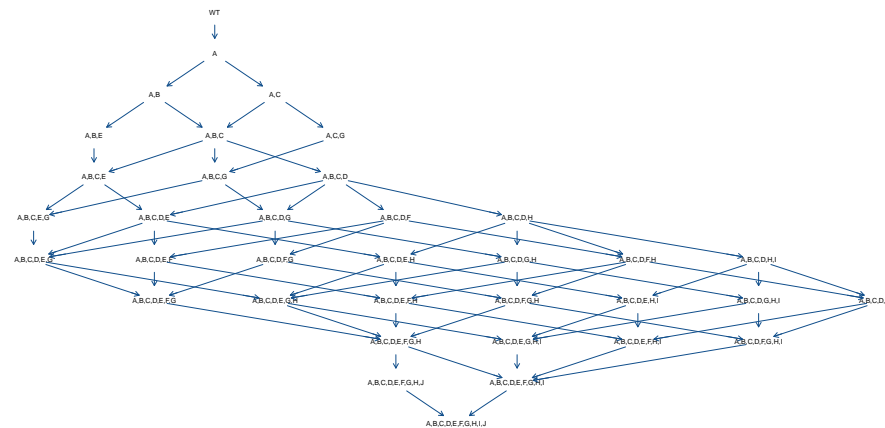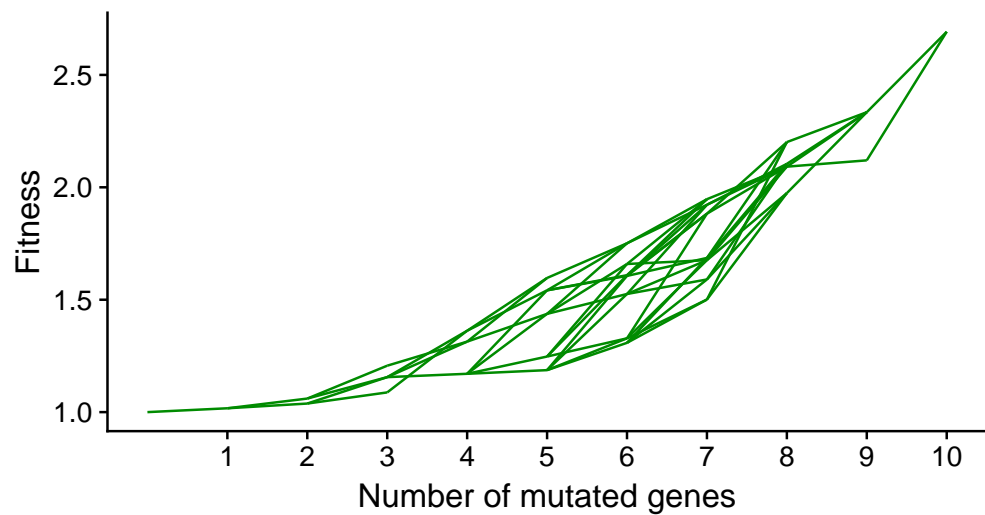

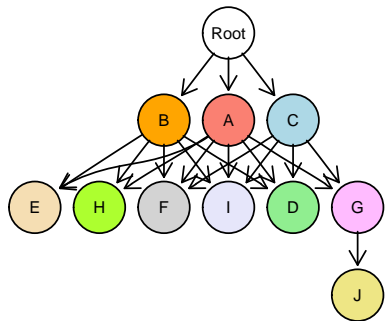

ID 5aGJFJcQGLZfPkJM  
 acc genotypes 108  
 peaks no back 1  
 removed edges 0  
 prop rem edges 0

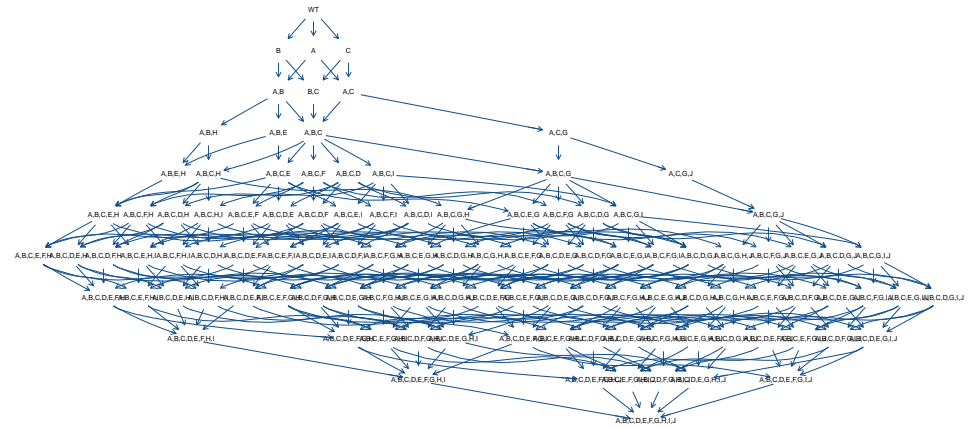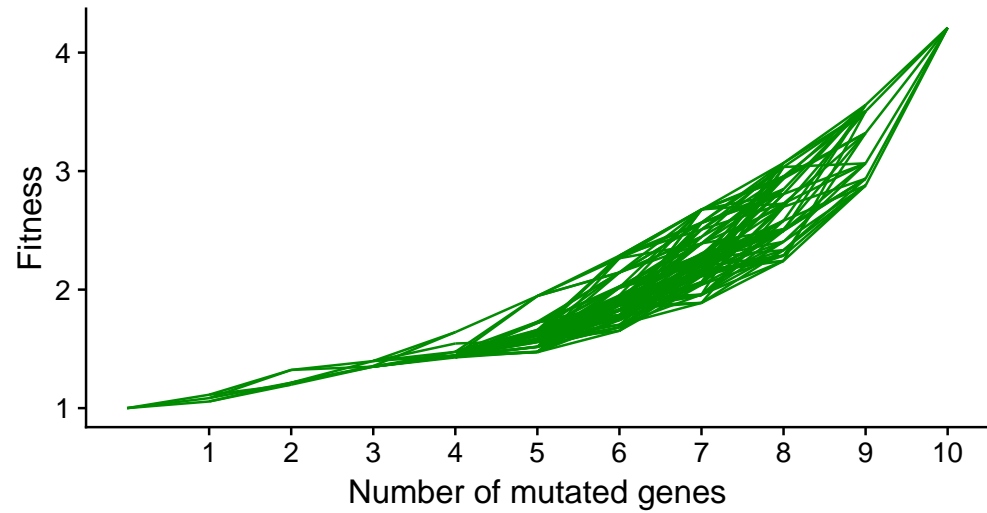

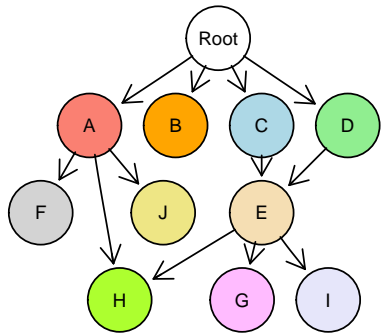

ID 5ism4PKhL1Vt6vub  
 acc genotypes 112  
 peaks no back 1  
 removed edges 0  
 prop rem edges 0

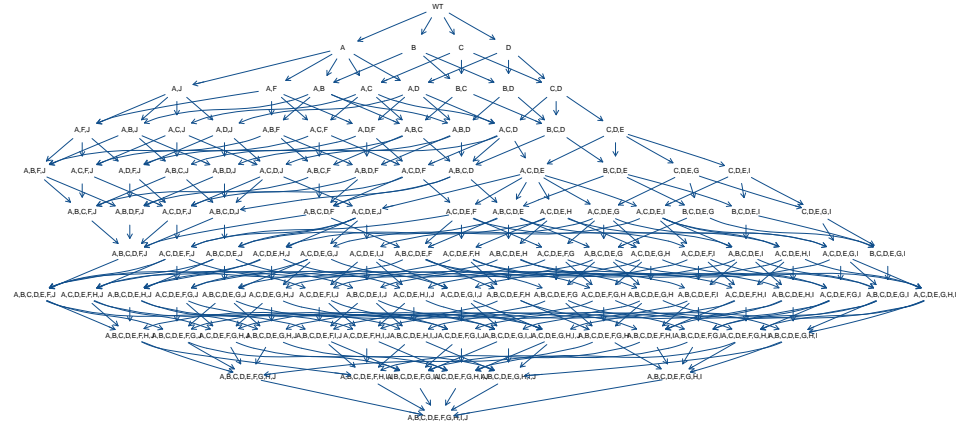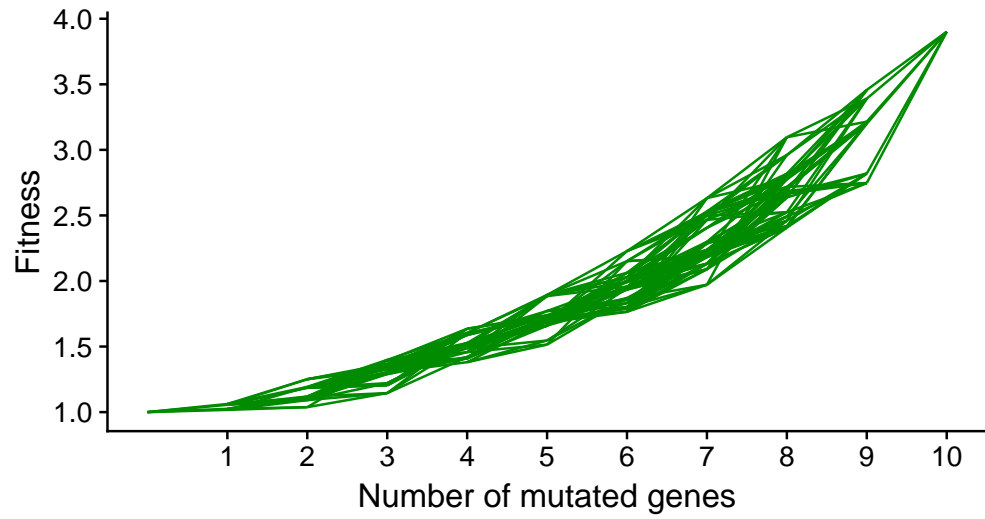

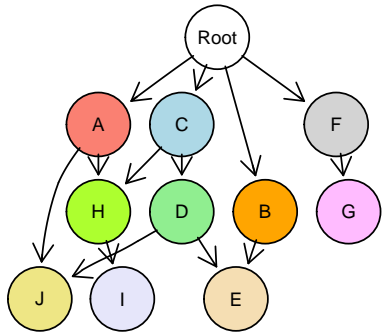

ID 5j8b10ekasUqQVF9H  
 acc genotypes 99  
 peaks no back 1  
 removed edges 0  
 prop rem edges 0

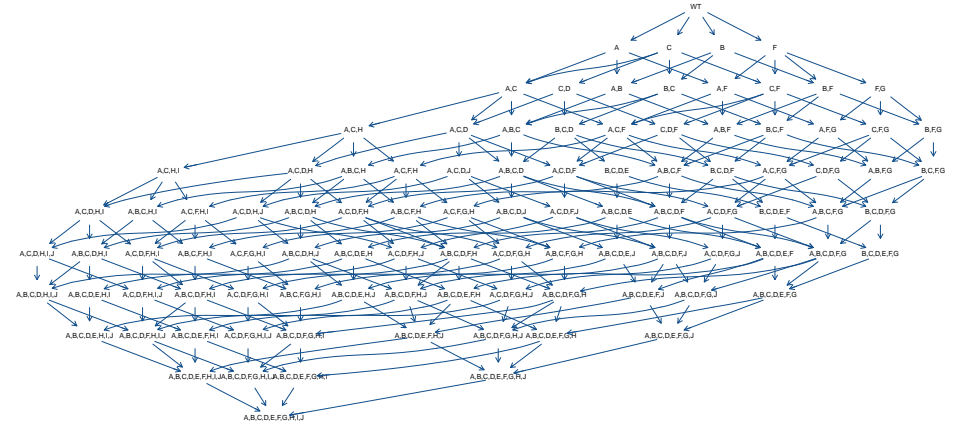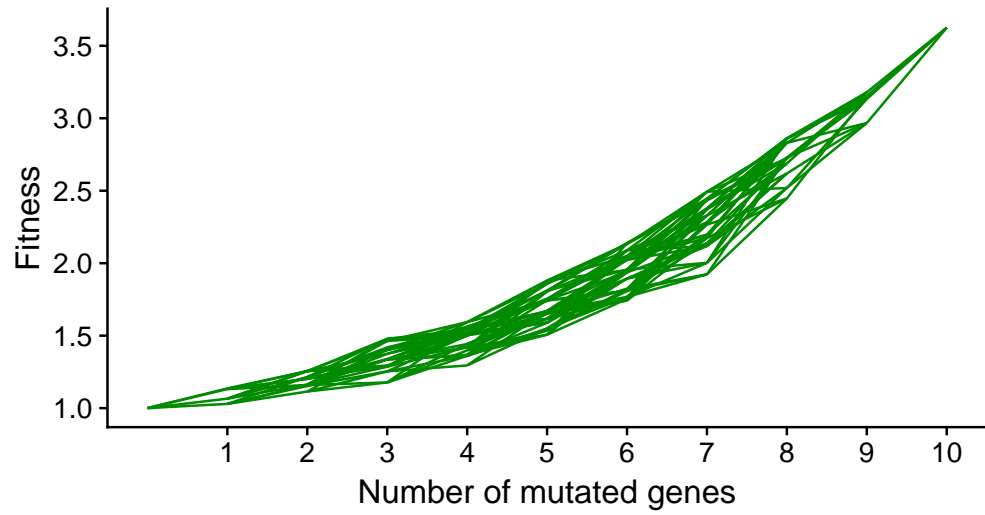

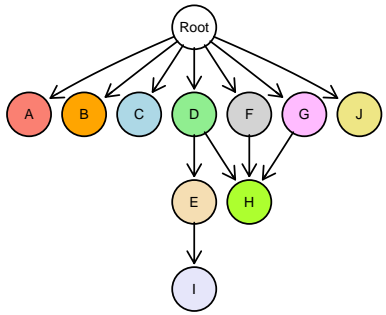

ID 5RbSm92BvC5zV10ss  
 acc genotypes 304  
 peaks no back 1  
 removed edges 0  
 prop rem edges 0

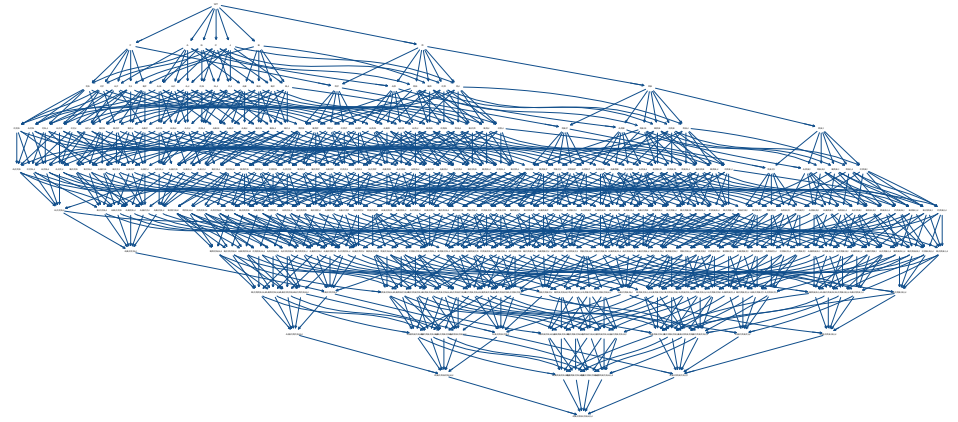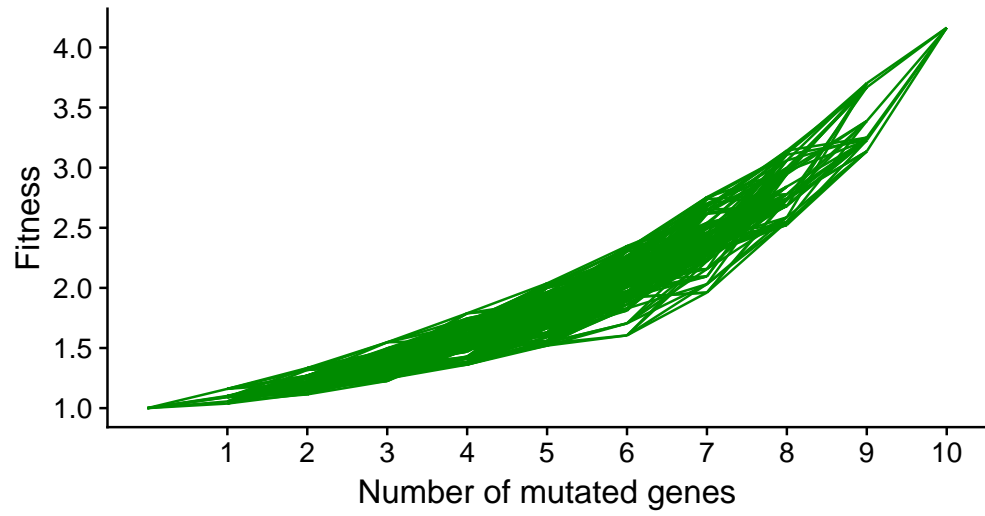

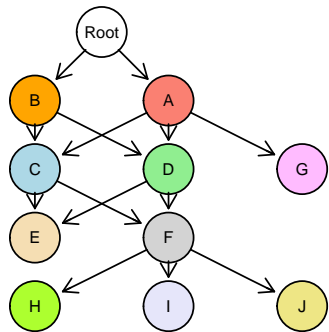

ID 6Lxt9hxPDEYs7HrO  
 acc genotypes 46  
 peaks no back 1  
 removed edges 0  
 prop rem edges 0

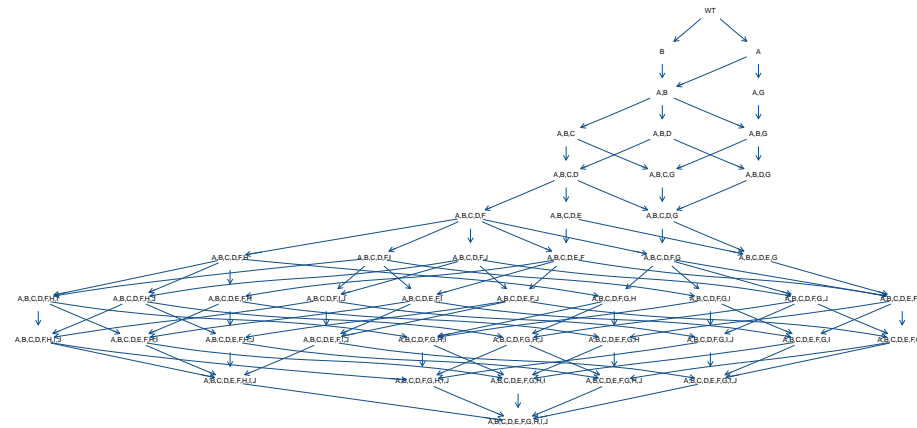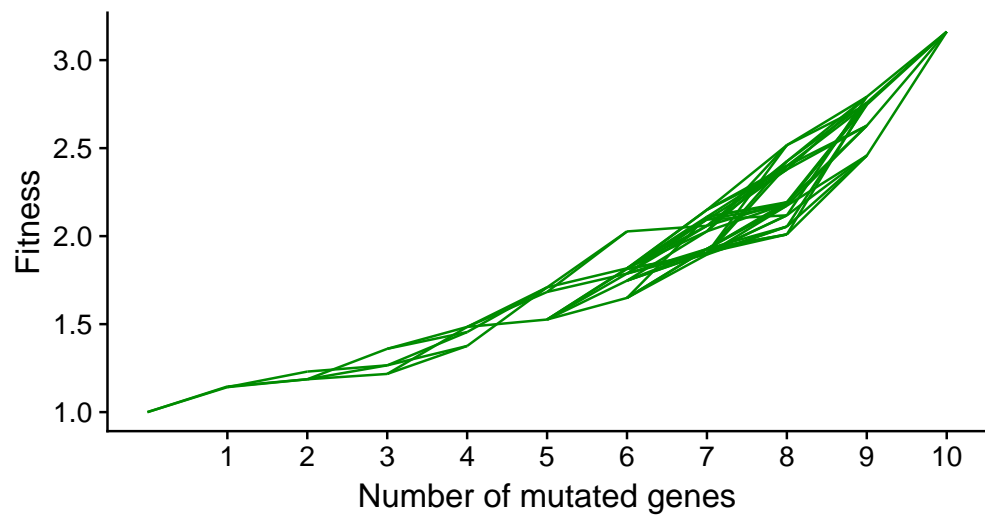

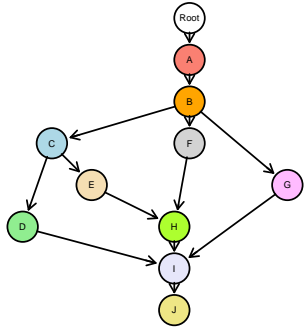

ID **7Fj7Va75pN1rV57O**  
 acc genotypes **28**  
 peaks no back 1  
 removed edges 0  
 prop rem edges 0

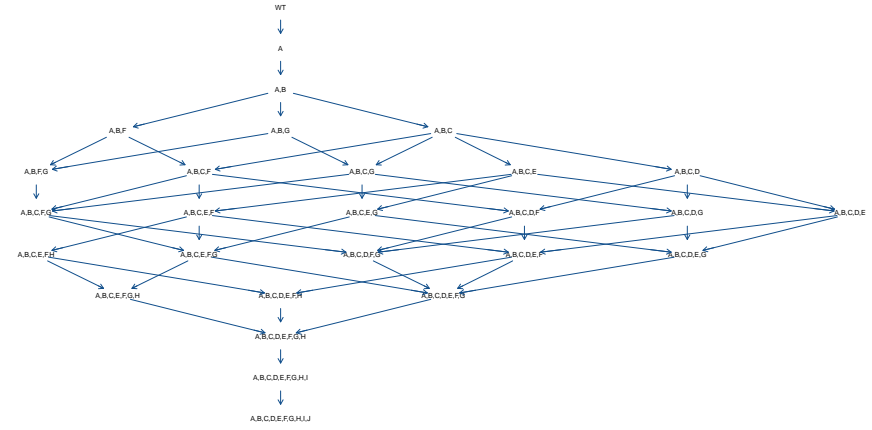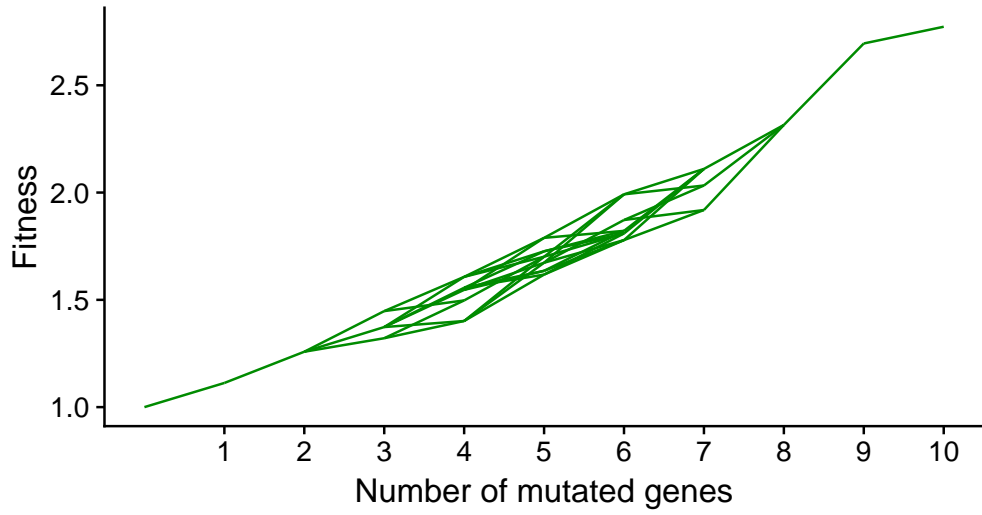



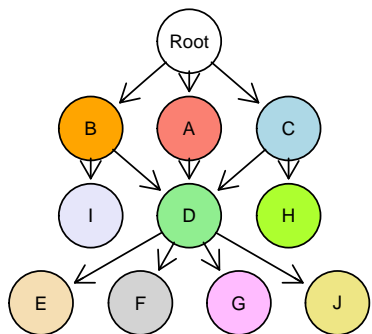

ID 7MYmvXyPDesfmMhs  
 acc genotypes 82  
 peaks no back 1  
 removed edges 0  
 prop rem edges 0

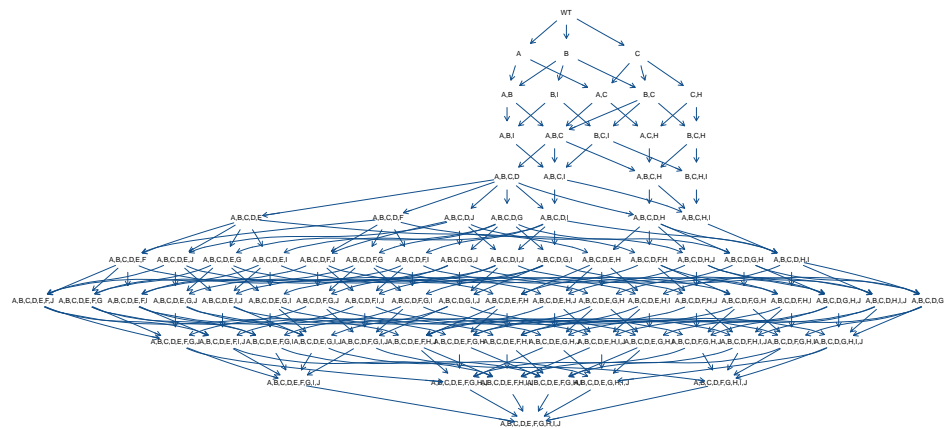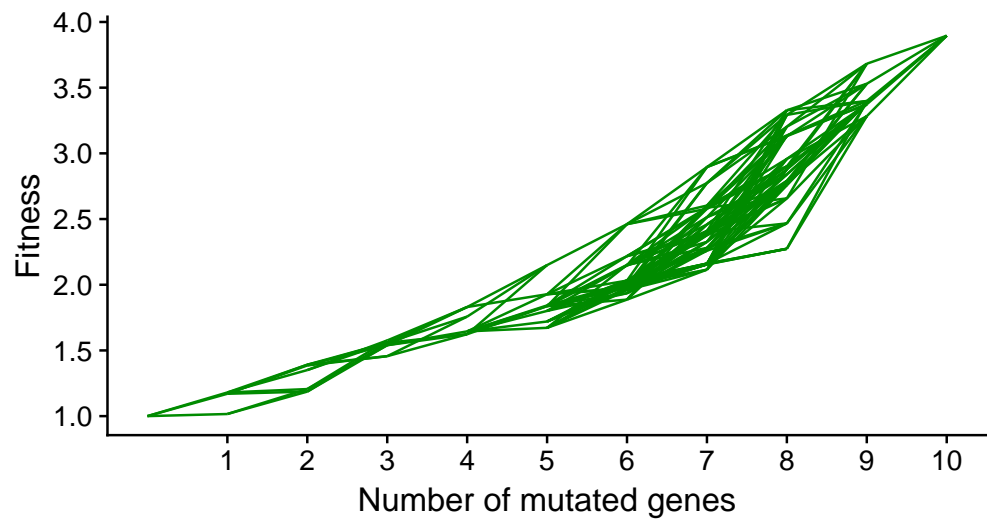

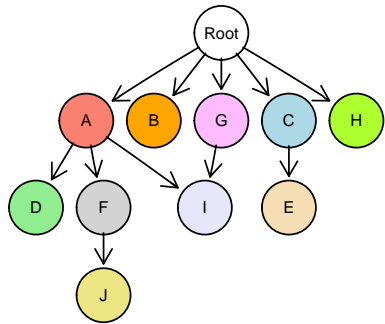

ID 7xha8OIAIqIZ4SXr  
 acc genotypes 240  
 peaks no back 1  
 removed edges 0  
 prop rem edges 0

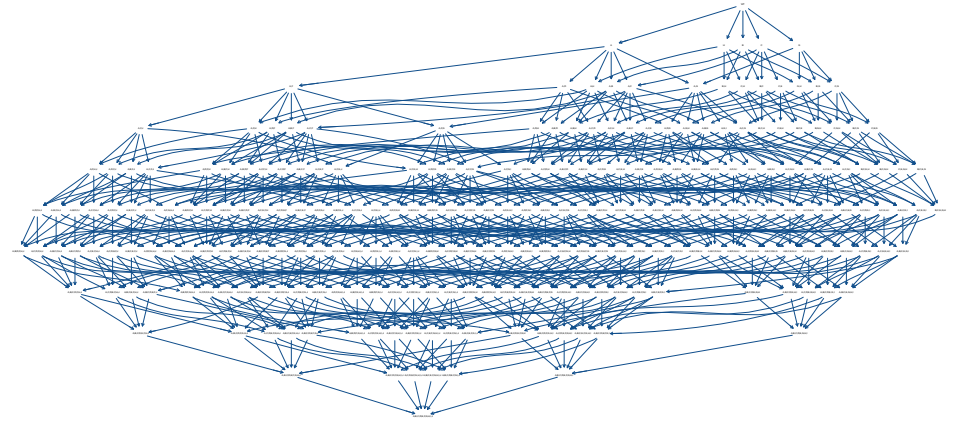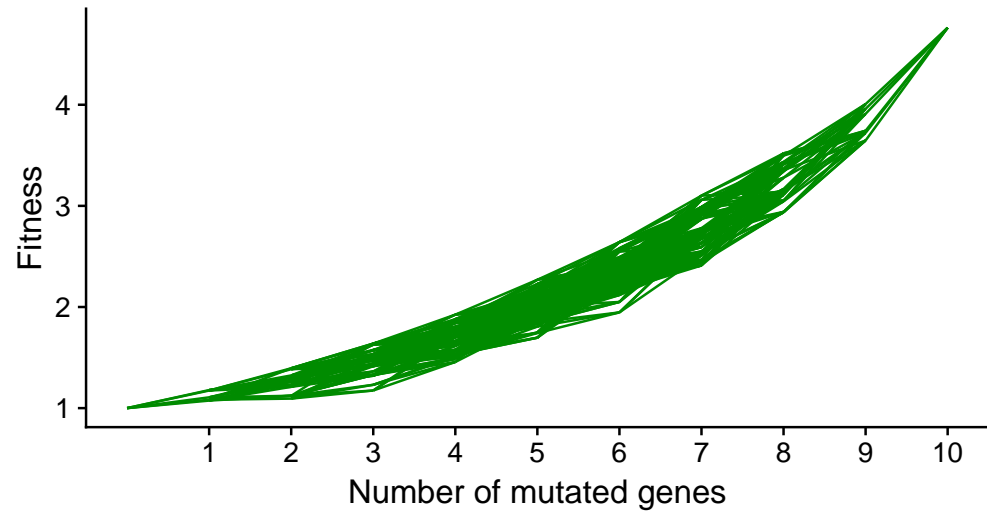

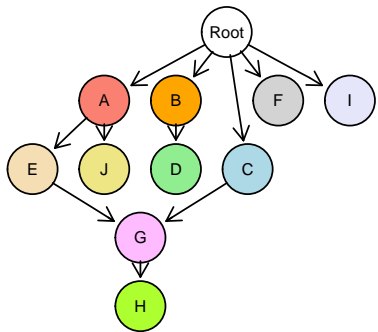

ID **84w3Yj1QSkf4zJx4**  
 acc genotypes **168**  
 peaks no back 1  
 removed edges 0  
 prop rem edges 0

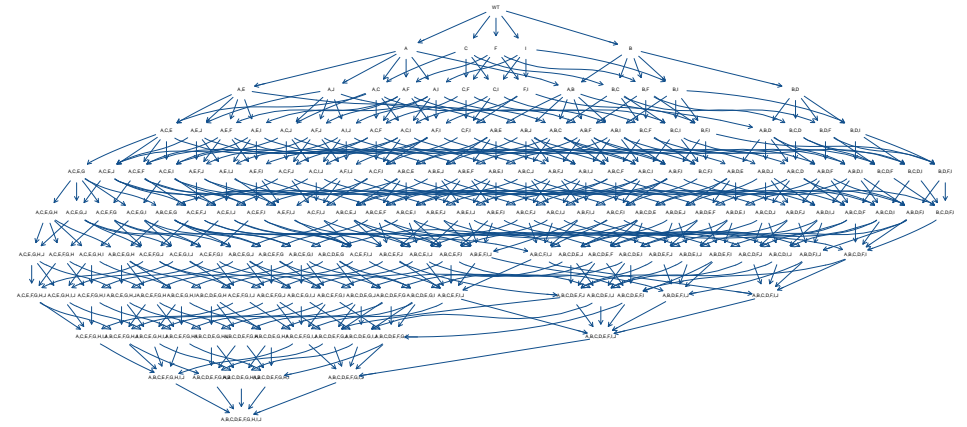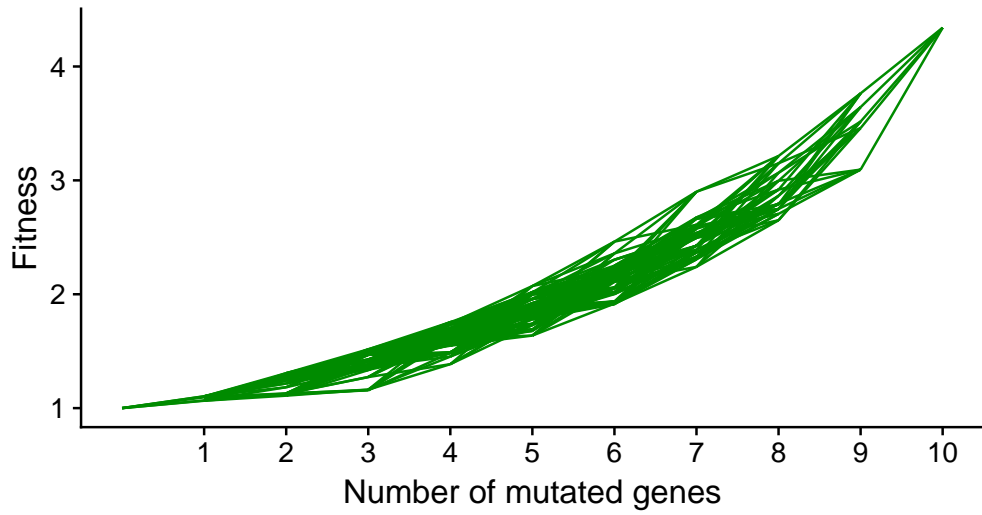

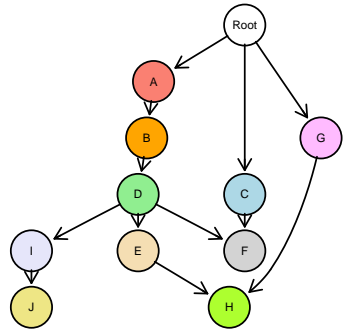

ID [8Libw9yeJgfs5Q95](#)  
 acc genotypes 57  
 peaks no back 1  
 removed edges 0  
 prop rem edges 0

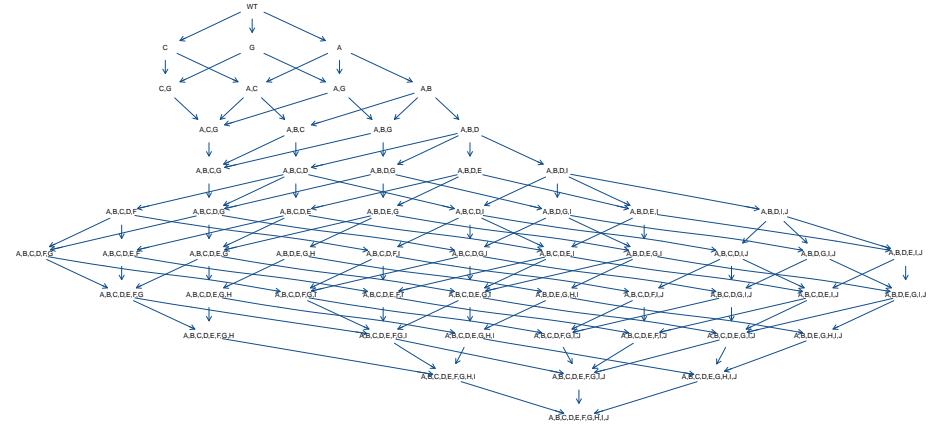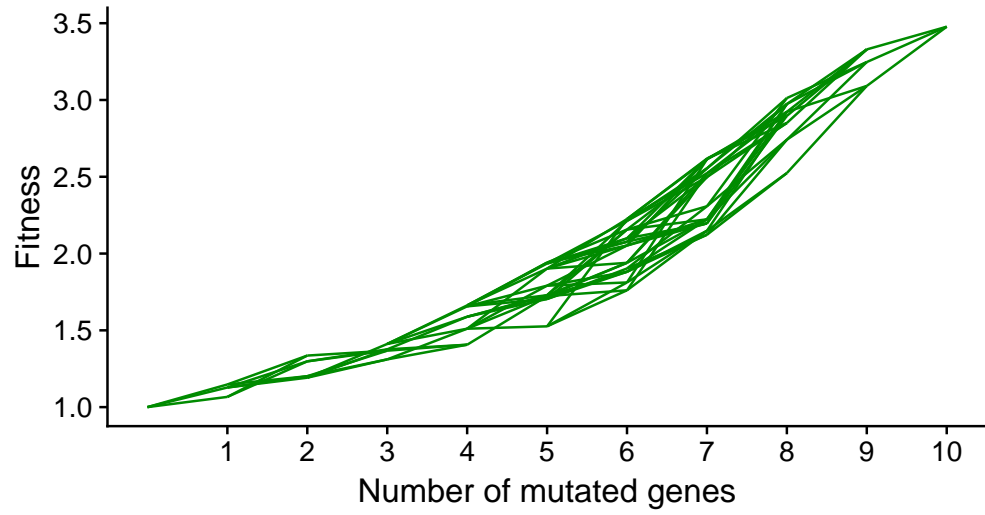



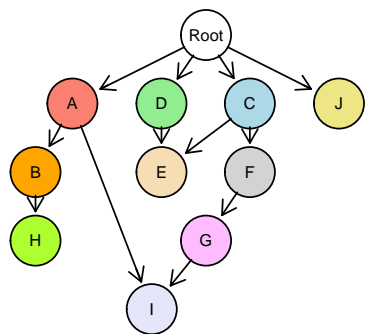

ID **ad9ndClhE585IPSN**  
 acc genotypes **106**  
 peaks no back 1  
 removed edges 0  
 prop rem edges 0

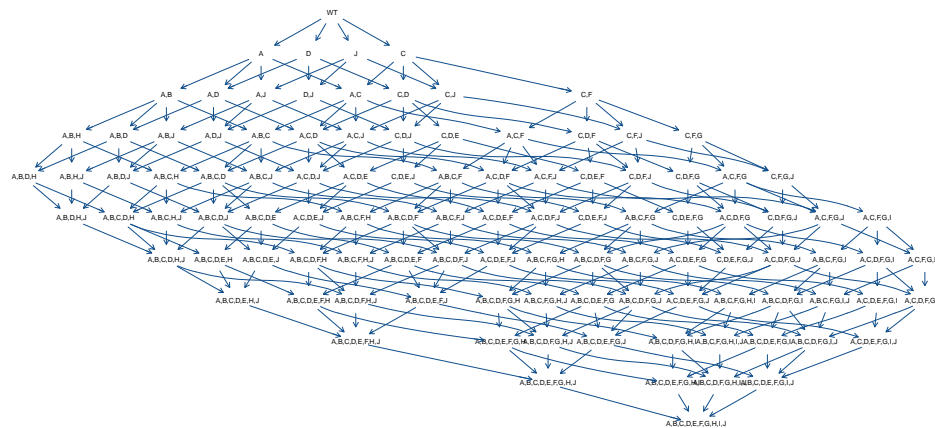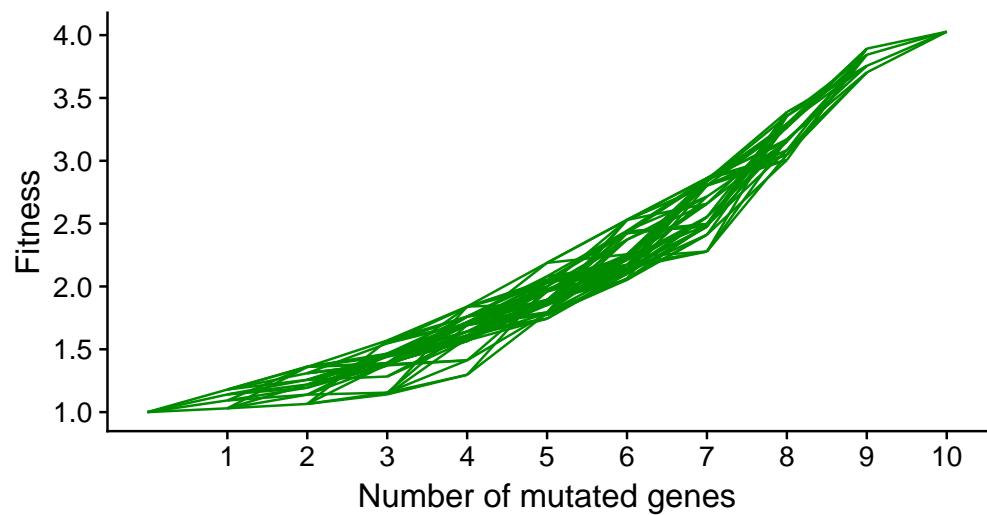

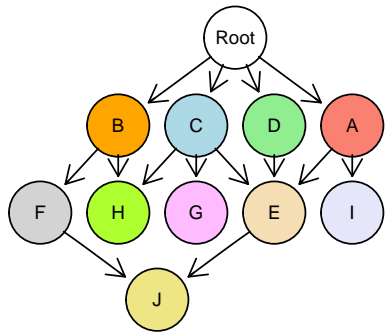

ID AFZHDDg9eZ1wABOd  
 acc genotypes 106  
 peaks no back 1  
 removed edges 0  
 prop rem edges 0

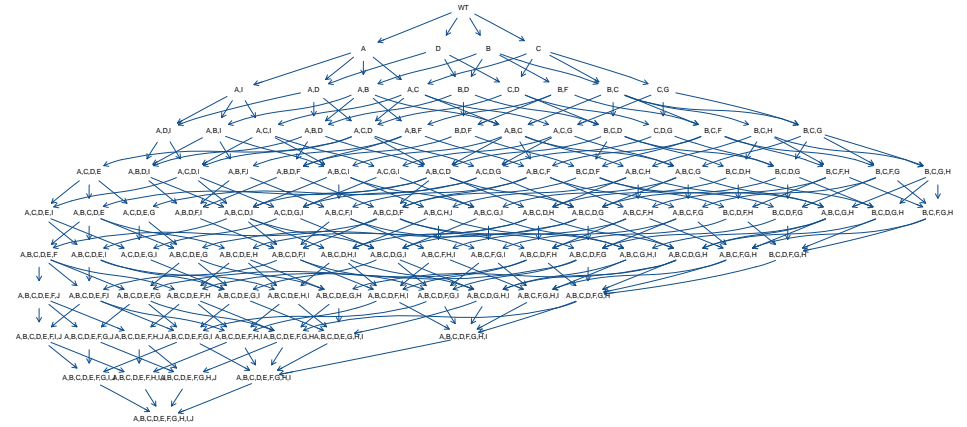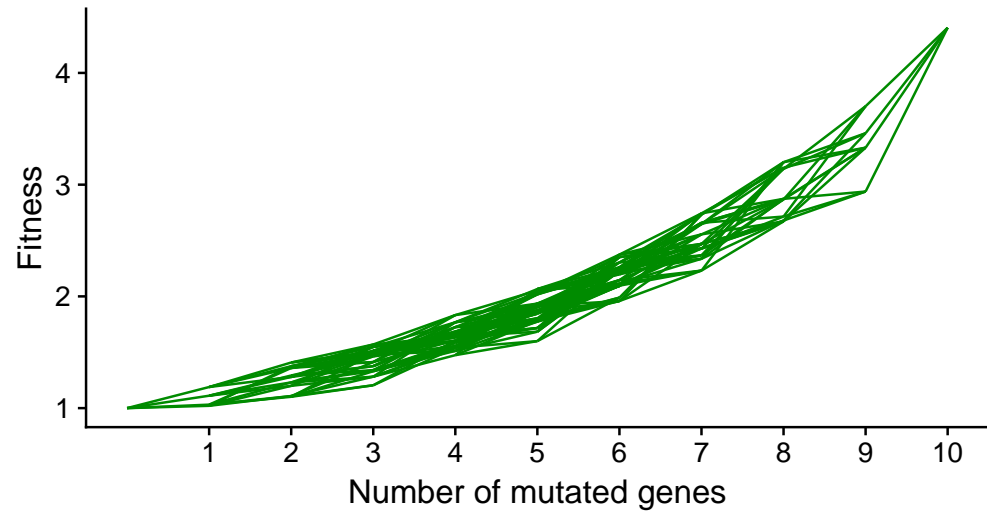

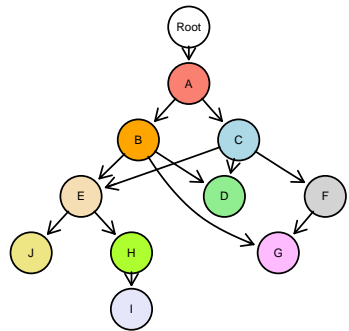

ID **ALSuQeDPTtbq8ING**  
 acc genotypes **47**  
 peaks no back 1  
 removed edges 0  
 prop rem edges 0

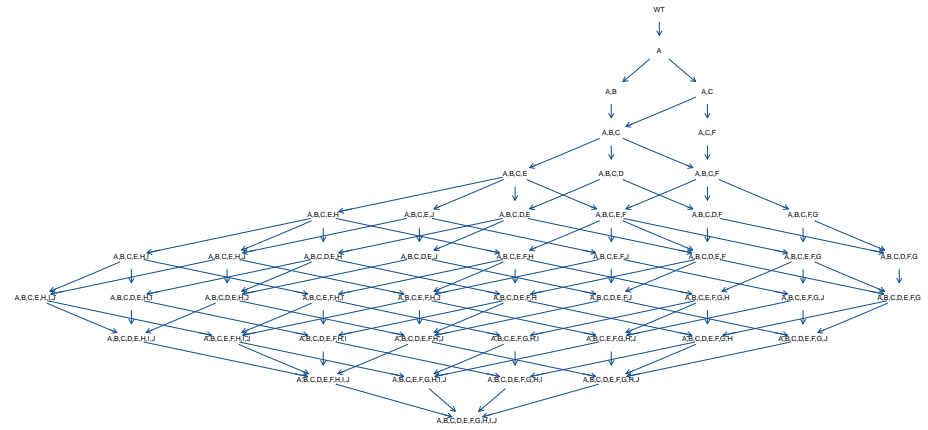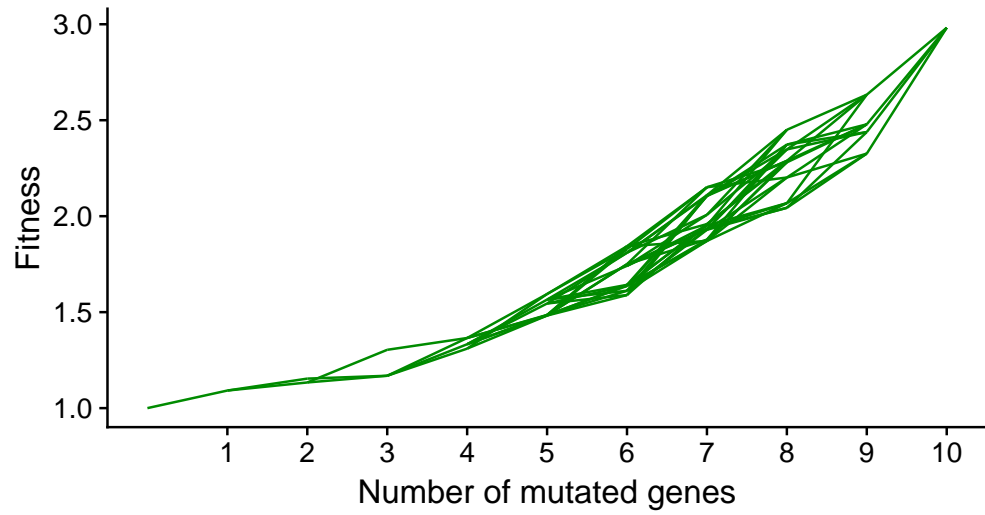



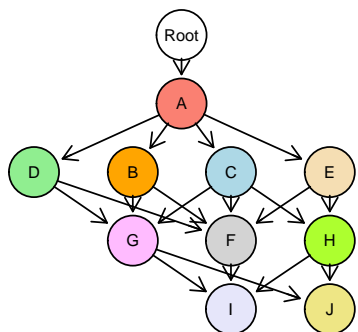

ID AV7D5TvJW78FixWP  
 acc genotypes 32  
 peaks no back 1  
 removed edges 0  
 prop rem edges 0

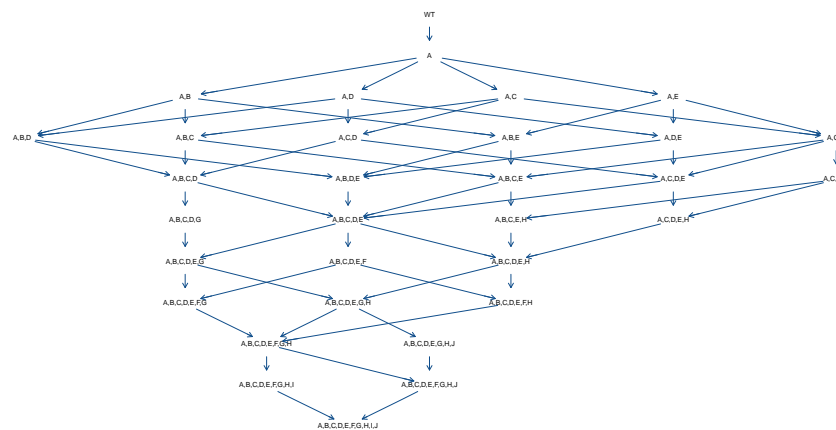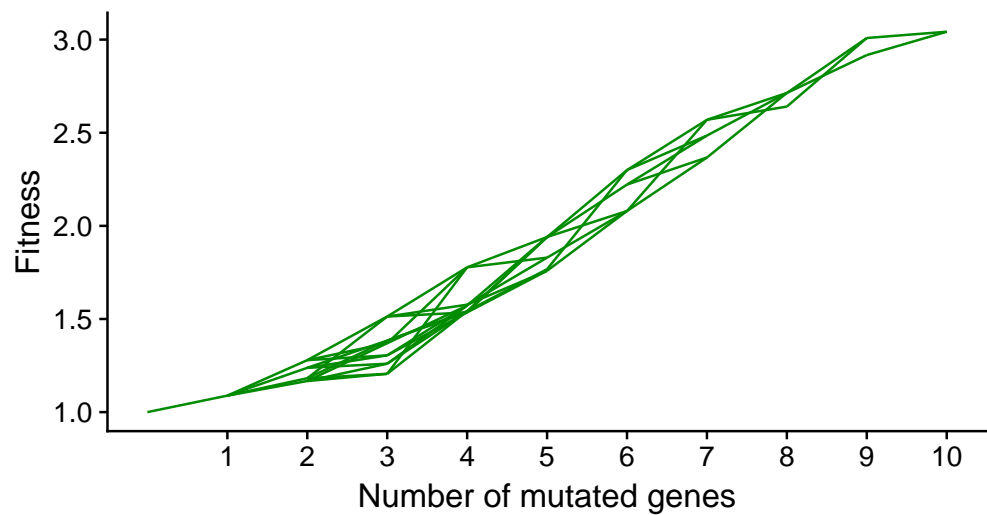

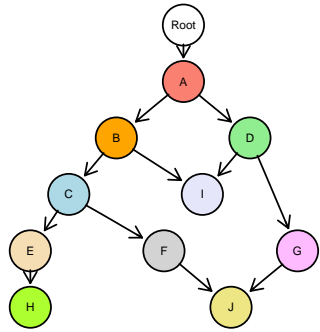

ID [AzcqFM9ljyJEevU2](#)  
 acc genotypes 45  
 peaks no back 1  
 removed edges 0  
 prop rem edges 0

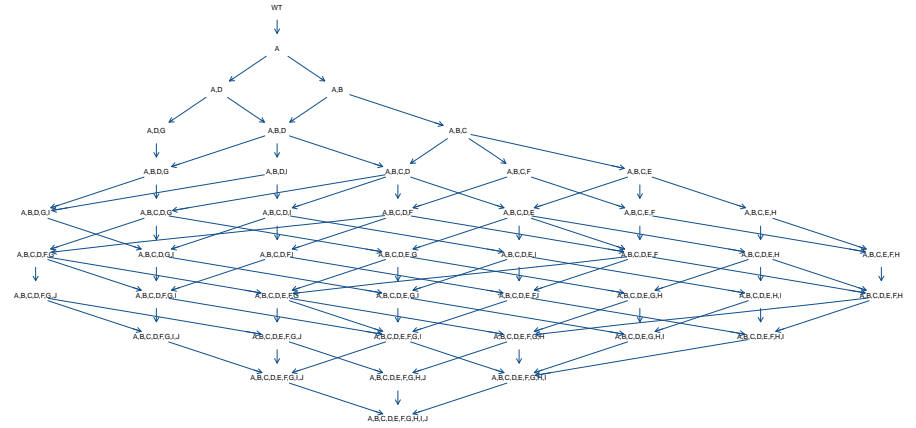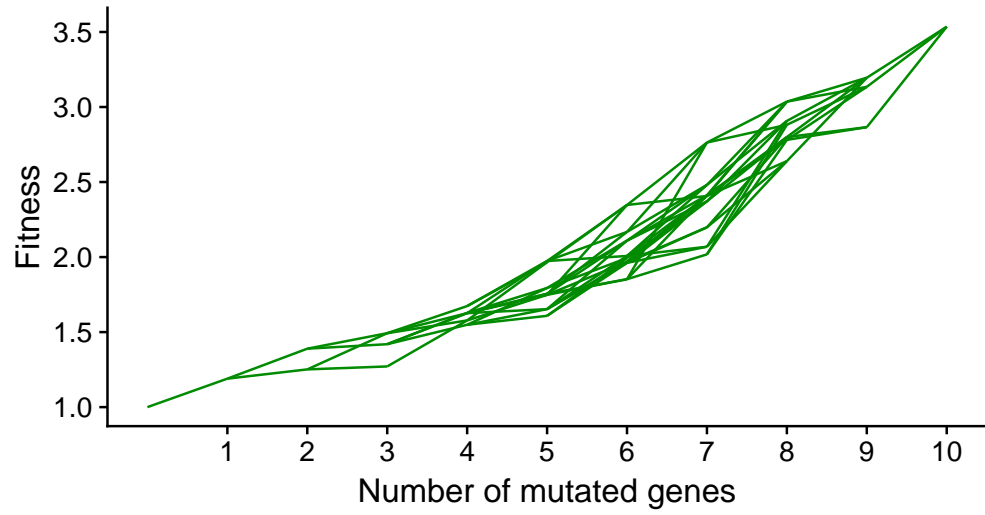

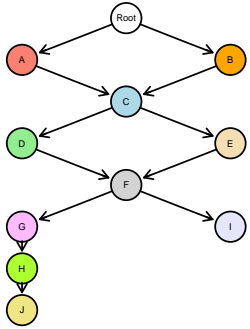

ID **B2Xyqnt5VTgzAZsS**  
 acc genotypes **16**  
 peaks no back 1  
 removed edges 0  
 prop rem edges 0

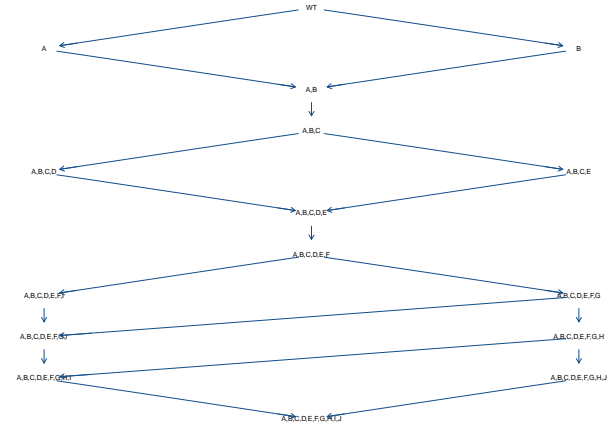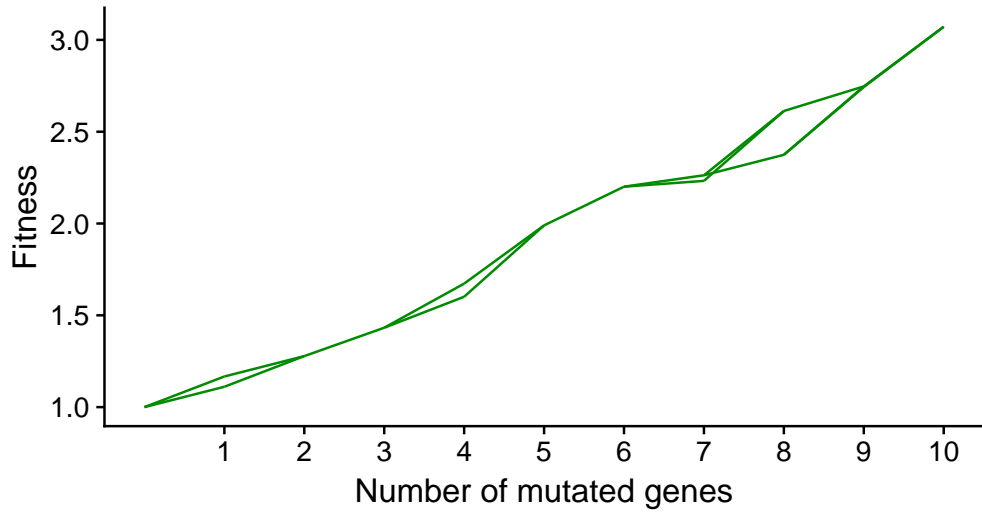

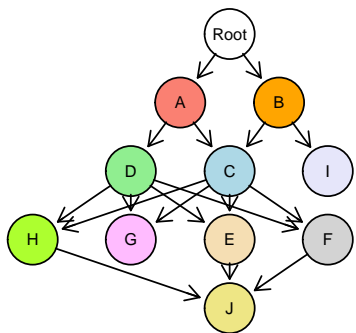

ID **b61qOPrfURmxrTRJ**  
 acc genotypes **47**  
 peaks no back 1  
 removed edges 0  
 prop rem edges 0

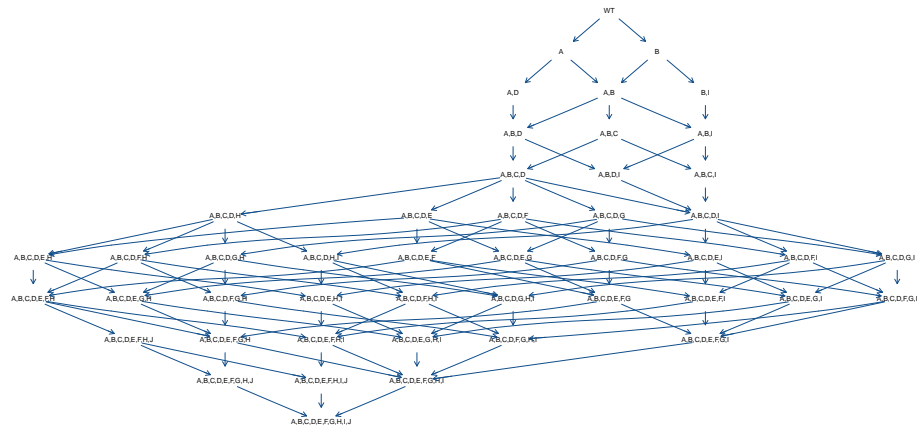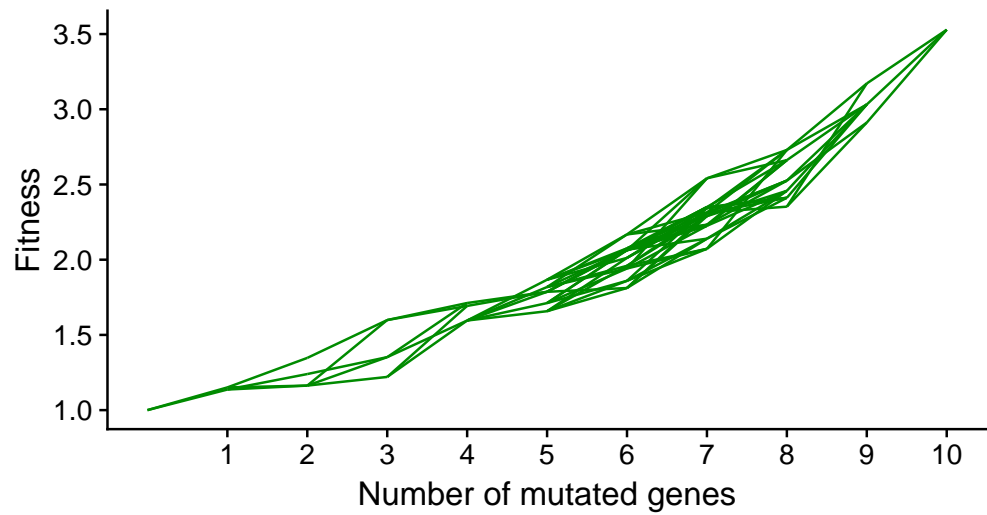

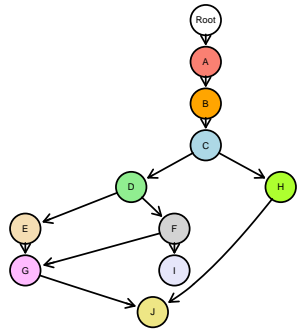

ID BkSjd8cAWeN4eVyO  
 acc genotypes 23  
 peaks no back 1  
 removed edges 0  
 prop rem edges 0

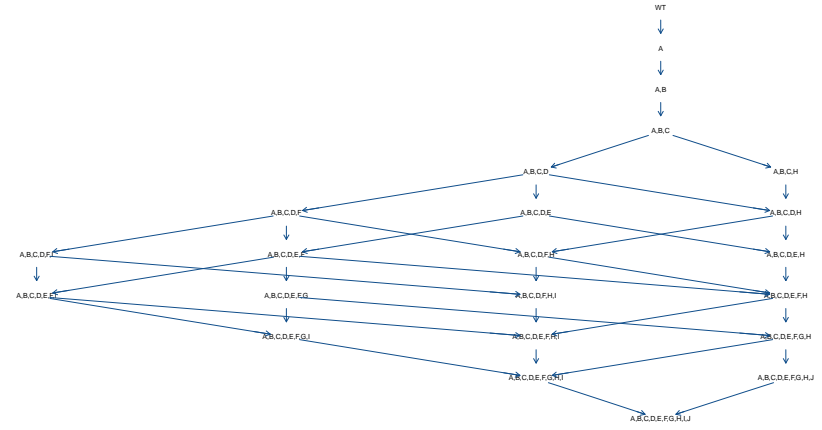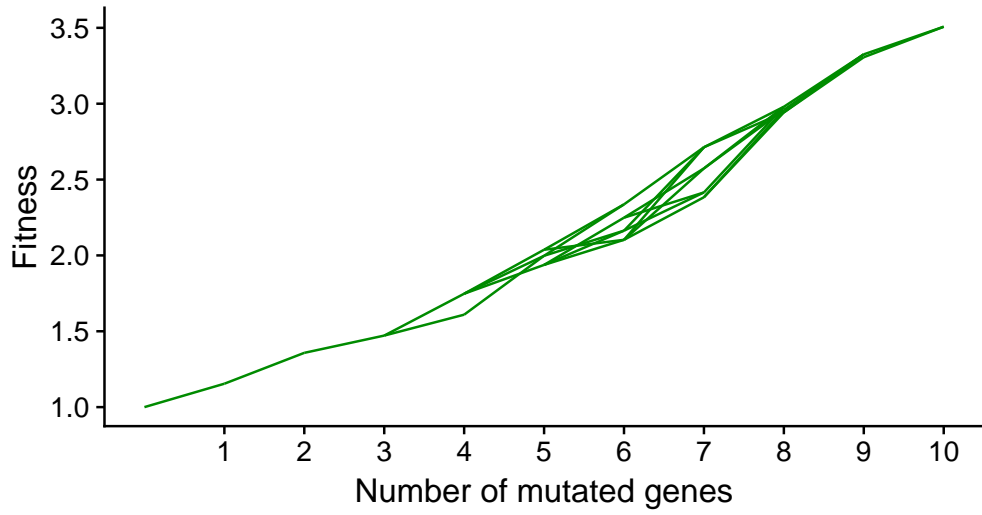

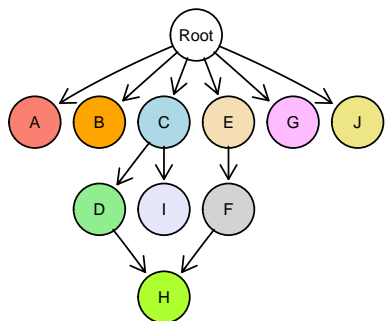

|                       |                  |
|-----------------------|------------------|
| <i>ID</i>             | BqTdapi2oHdGJNeQ |
| <i>acc genotypes</i>  | 272              |
| <i>peaks no back</i>  | 1                |
| <i>removed edges</i>  | 0                |
| <i>prop rem edges</i> | 0                |

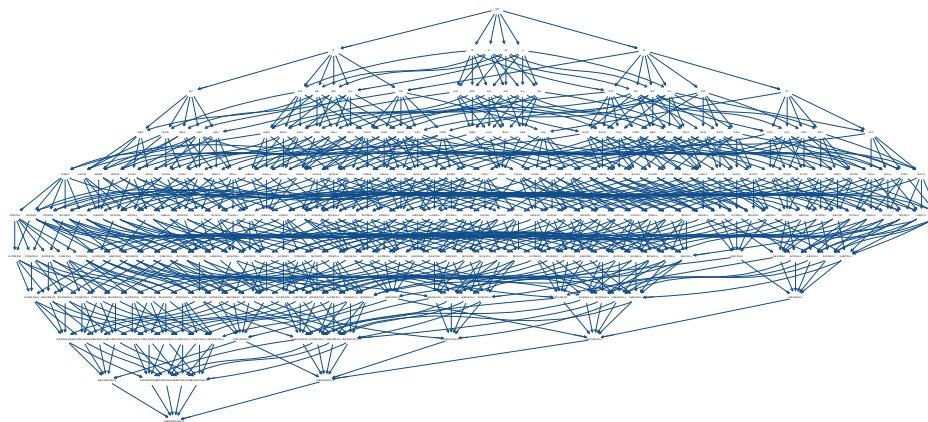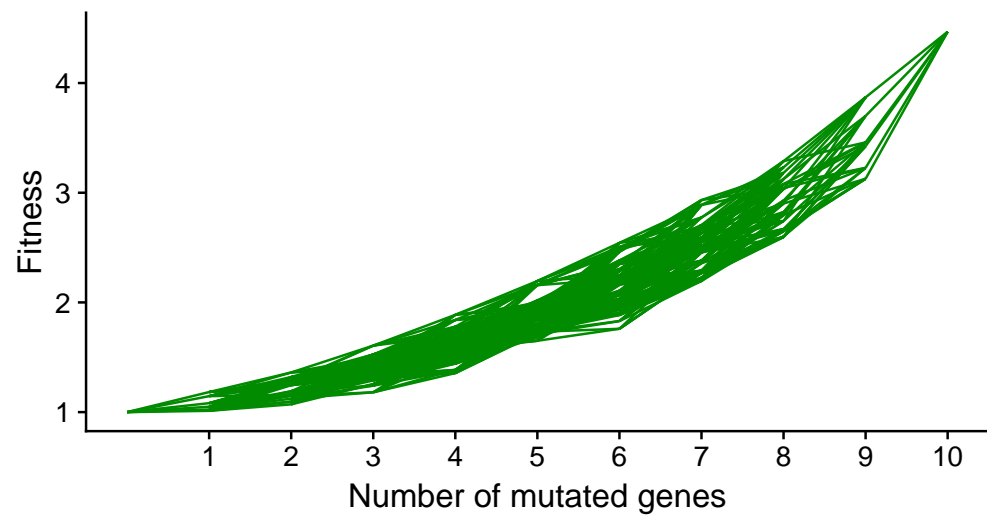

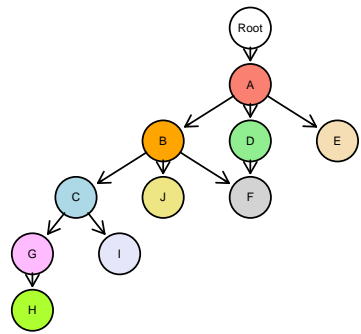

ID **bT93VZQ3TjAOVaY**  
 acc genotypes **89**  
 peaks no back 1  
 removed edges 0  
 prop rem edges 0

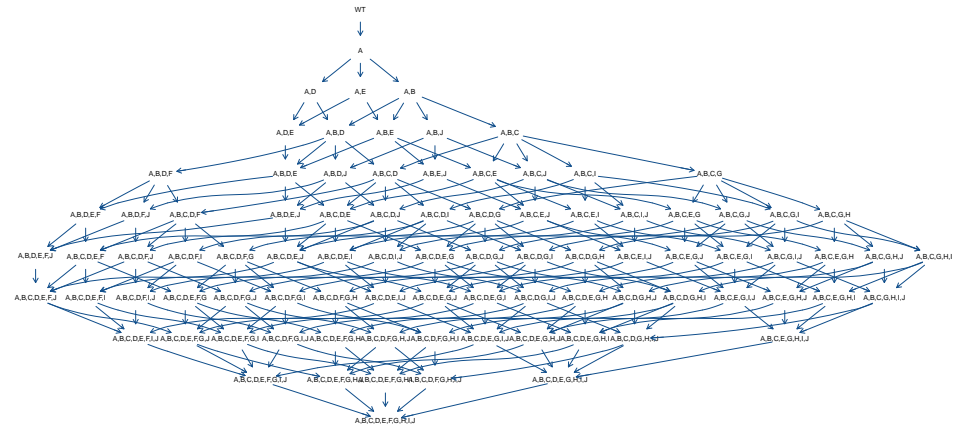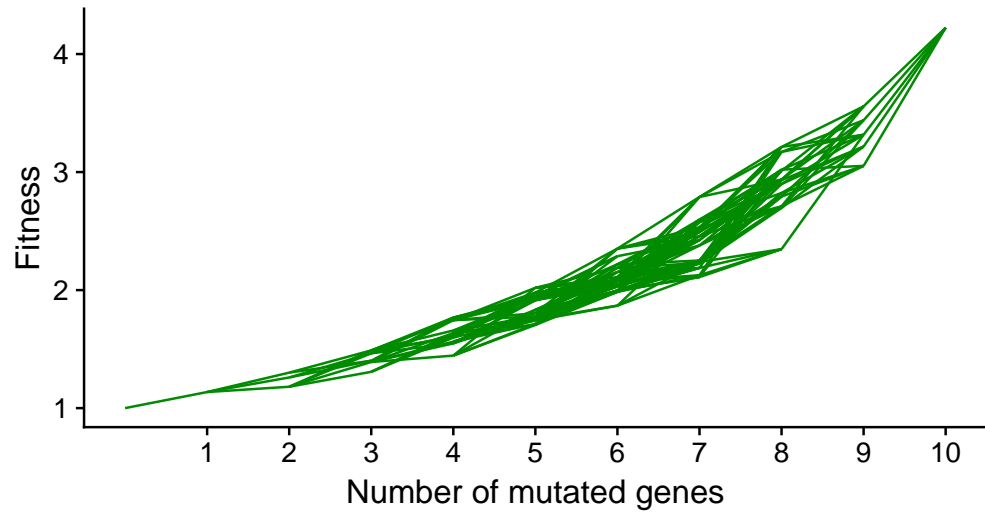

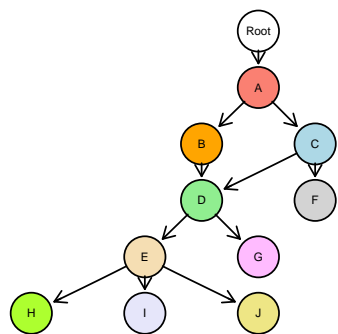

ID BU2srhsWr1UEIYvS  
 acc genotypes 43  
 peaks no back 1  
 removed edges 0  
 prop rem edges 0

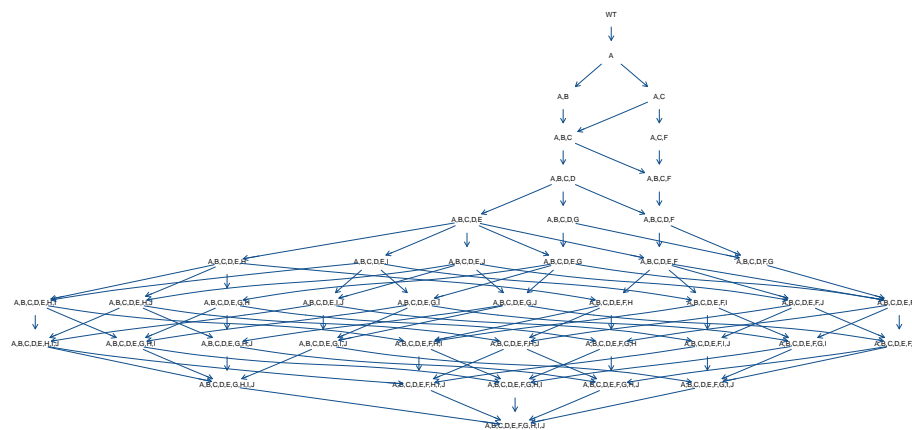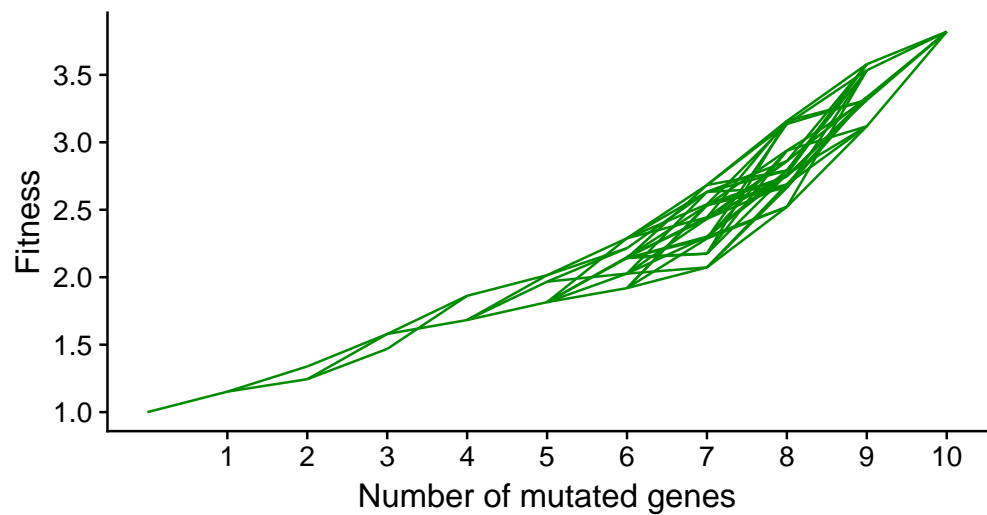



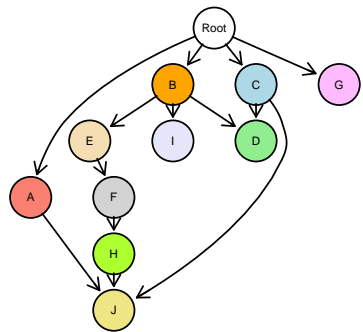

ID **bv105Mh6IDH10HPdOB**  
 acc genotypes **112**  
 peaks no back 1  
 removed edges 0  
 prop rem edges 0

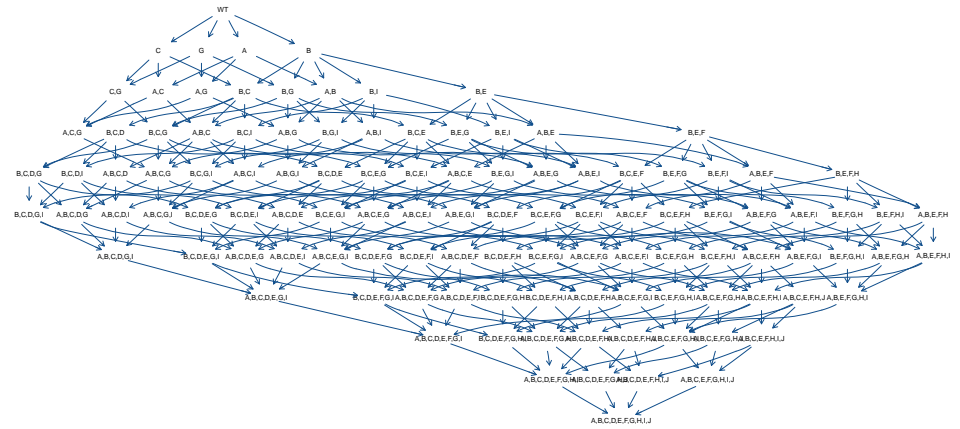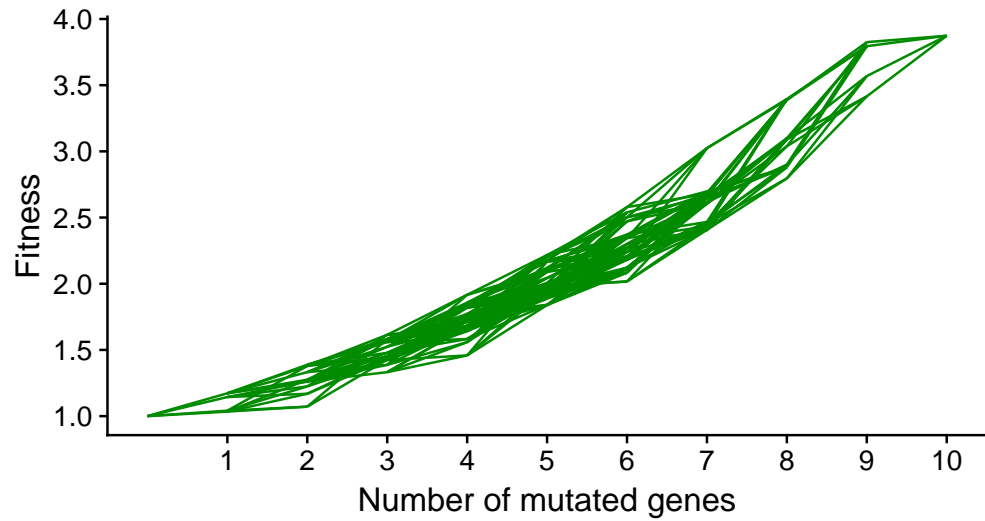

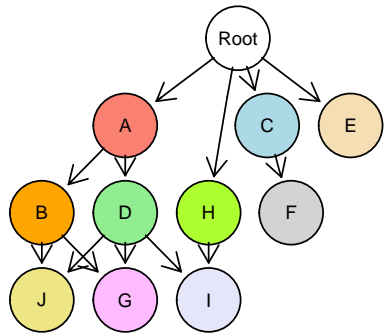

ID **BWkhGPzysoNbGoq1**  
 acc genotypes **126**  
 peaks no back 1  
 removed edges 0  
 prop rem edges 0

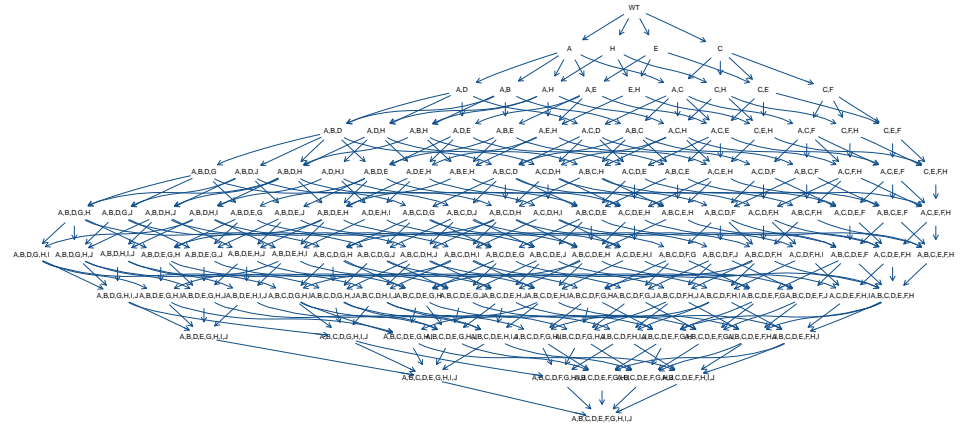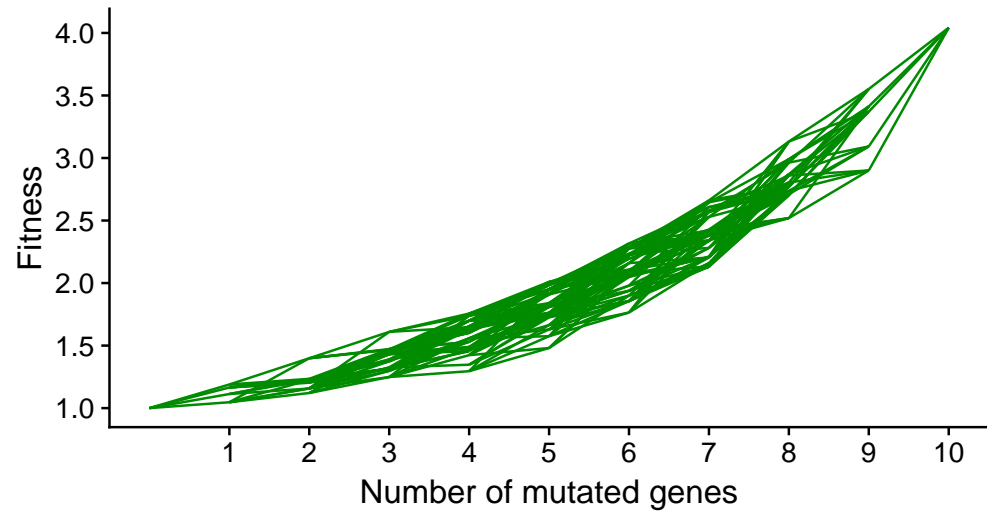

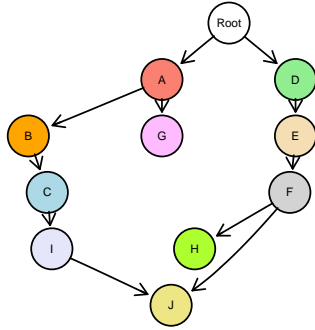

ID **bXvsBjdeGDgk10nj**  
 acc genotypes **49**  
 peaks no back 1  
 removed edges 0  
 prop rem edges 0

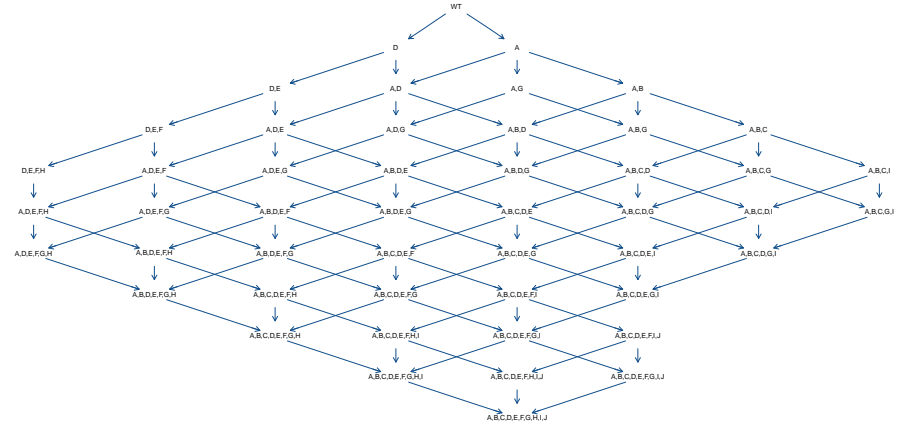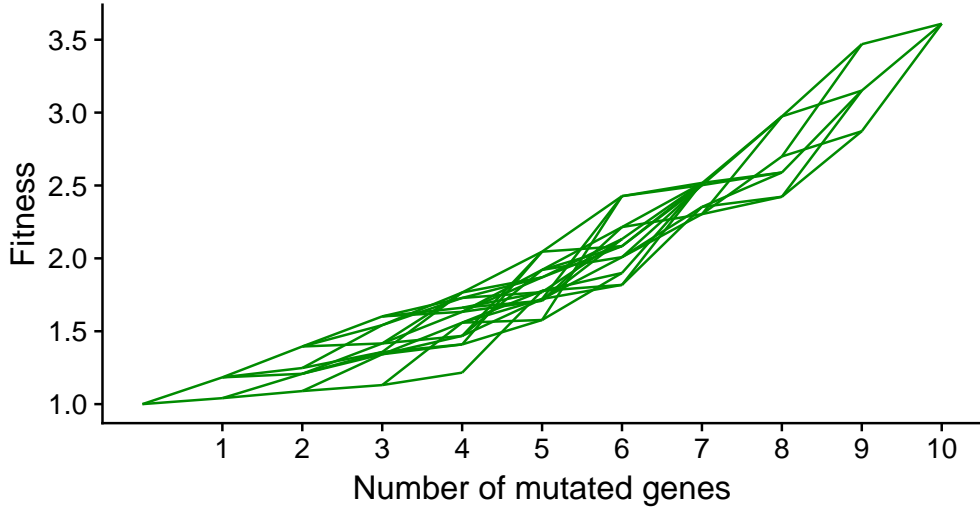

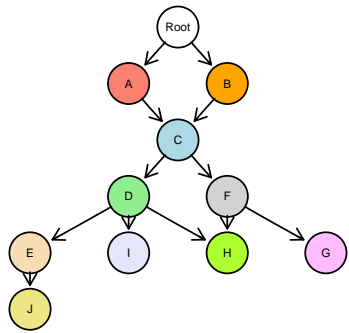

ID **c4lmcRlDBXQaiAza**  
 acc genotypes **37**  
 peaks no back 1  
 removed edges 0  
 prop rem edges 0

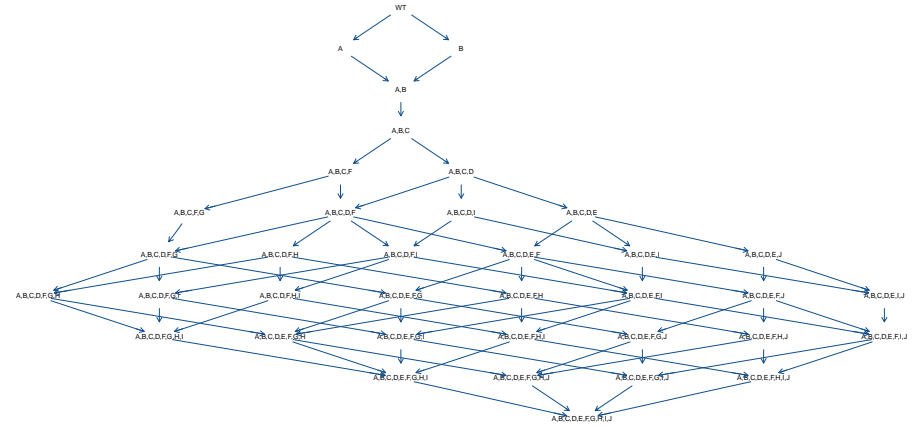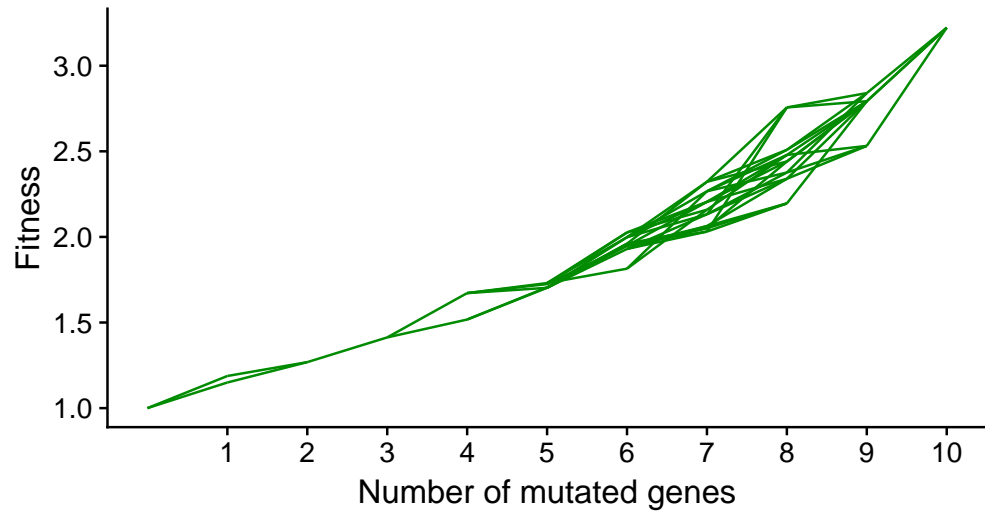

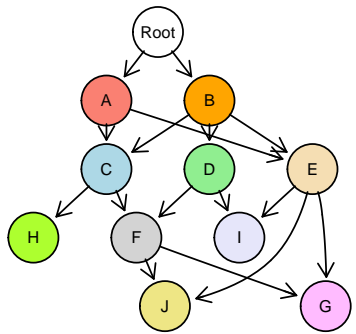

ID **cczLUqQeSfB6Czbr**  
 acc genotypes **37**  
 peaks no back **1**  
 removed edges **0**  
 prop rem edges **0**

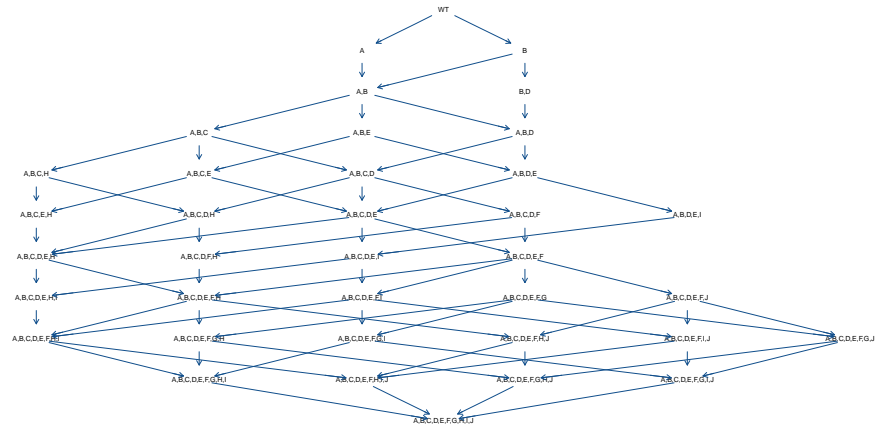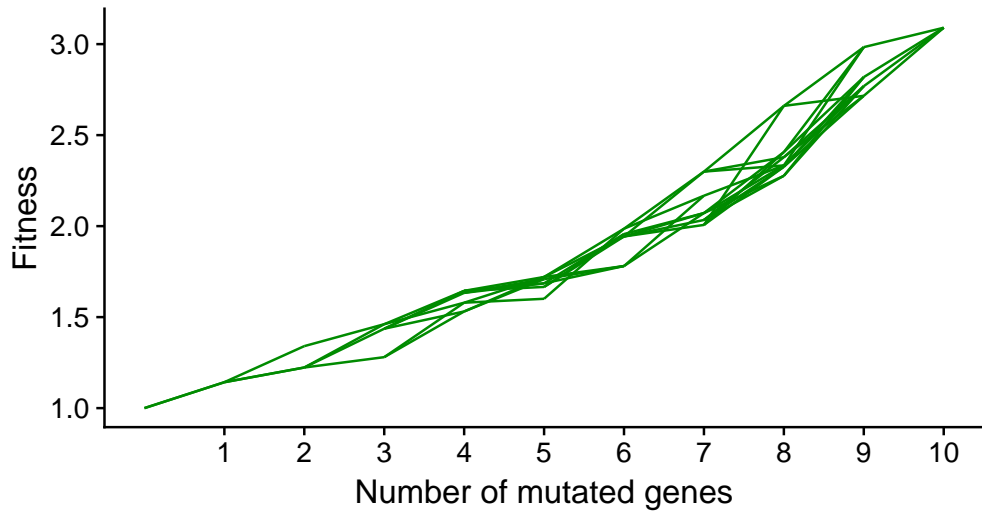

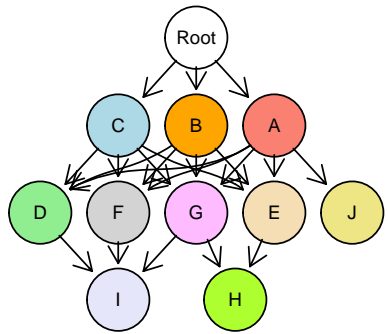

ID **CEKKz1011cQcW3hT7**  
 acc genotypes **56**  
 peaks no back 1  
 removed edges 0  
 prop rem edges 0

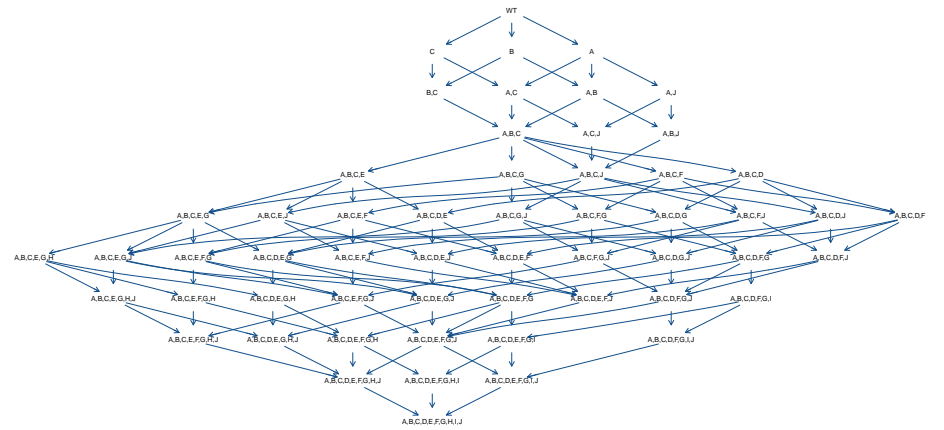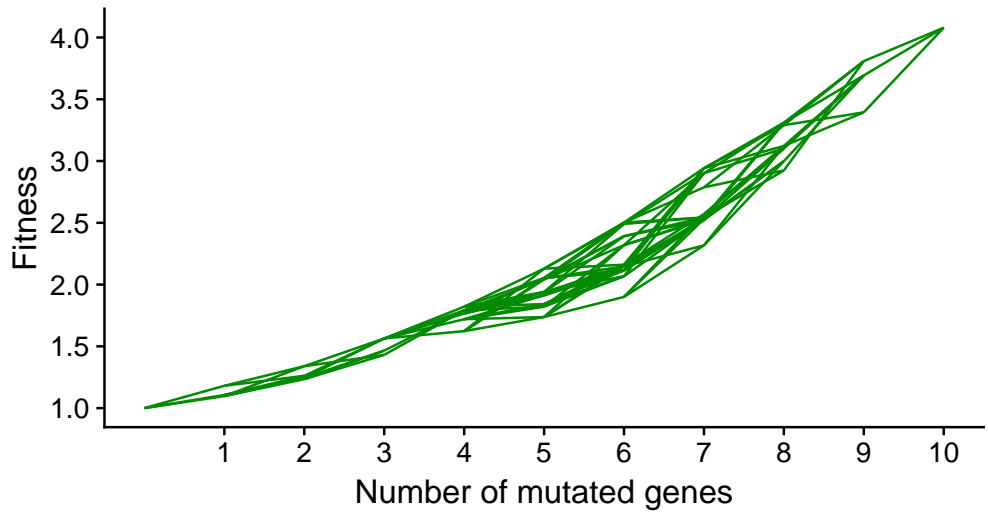

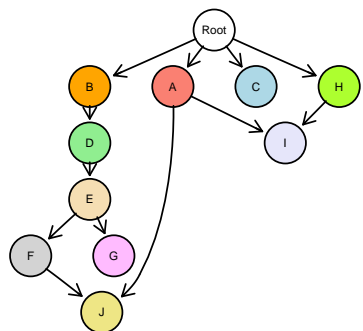

ID **COhbm810IA2tC32X**  
 acc genotypes **82**  
 peaks no back 1  
 removed edges 0  
 prop rem edges 0

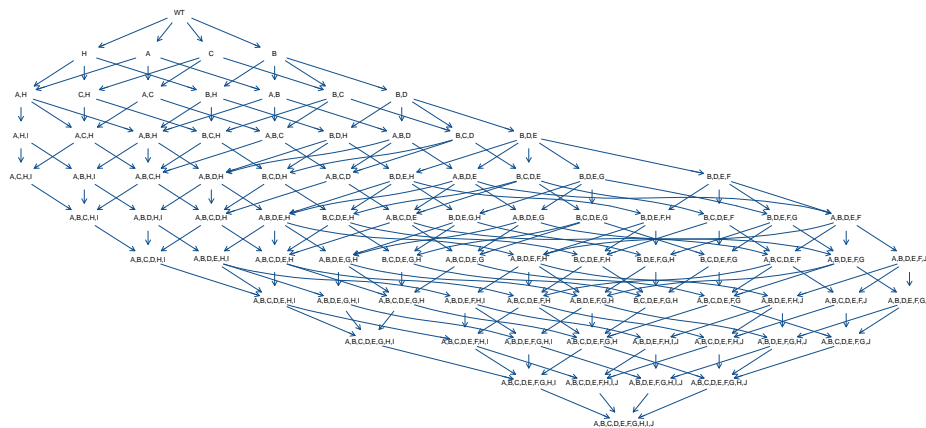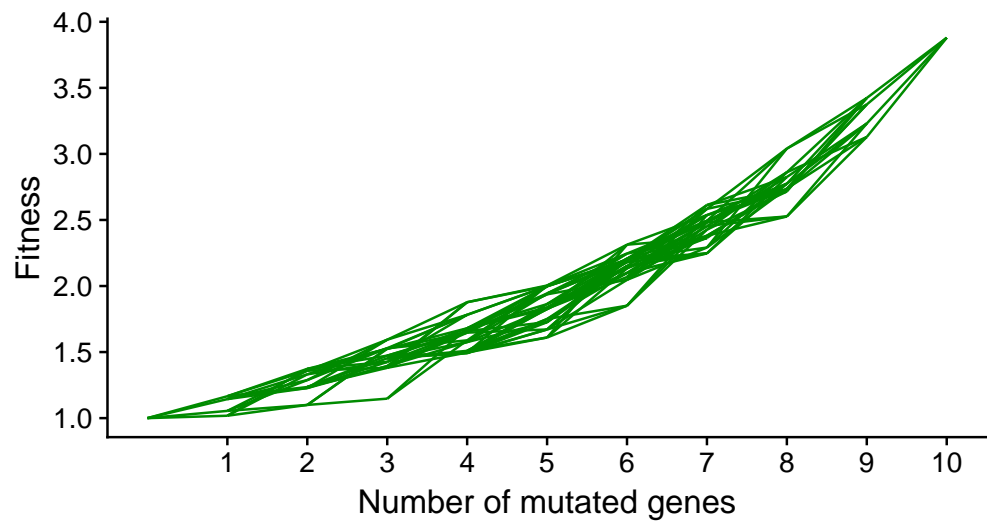

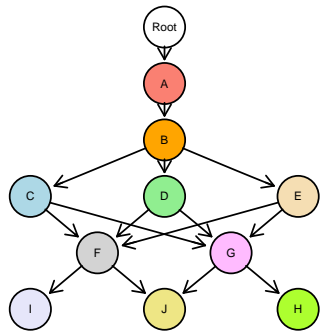

ID **CRSLV974aXfmgX10**  
 acc genotypes **22**  
 peaks no back 1  
 removed edges 0  
 prop rem edges 0

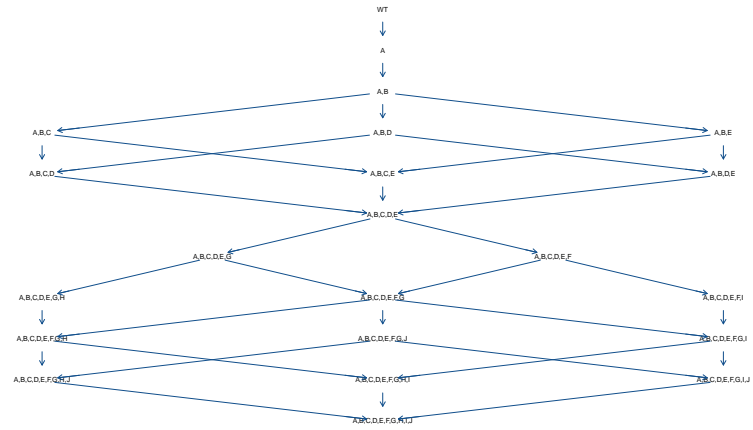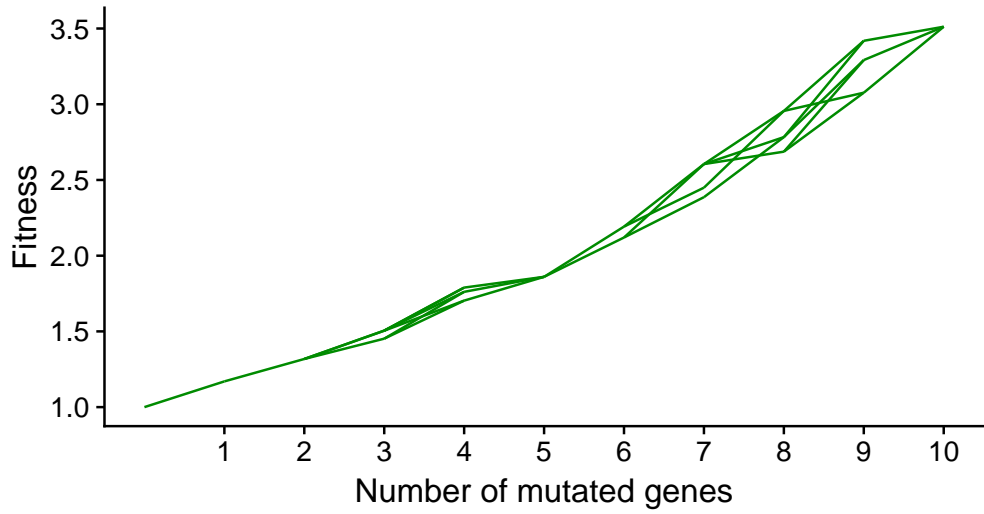



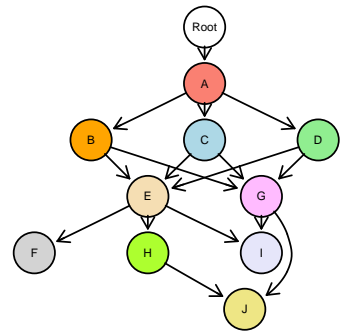

ID **cWla4xvRzx8wVebz**  
 acc genotypes **26**  
 peaks no back 1  
 removed edges 0  
 prop rem edges 0

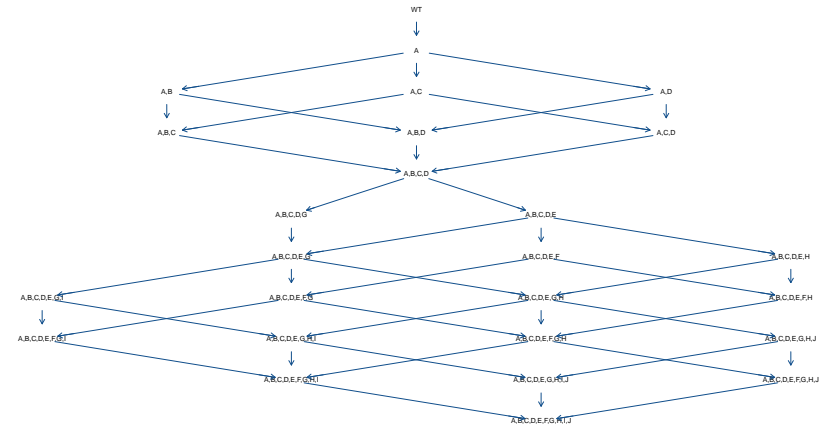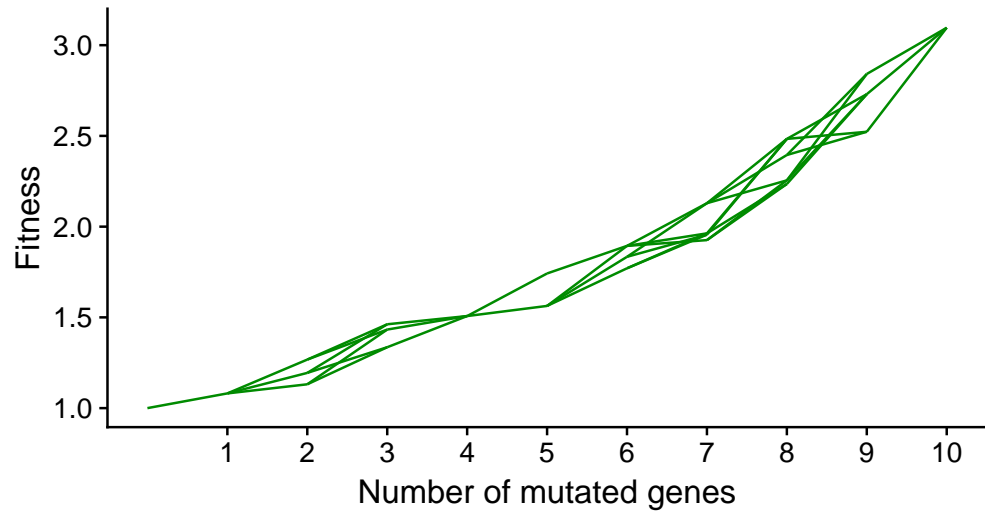

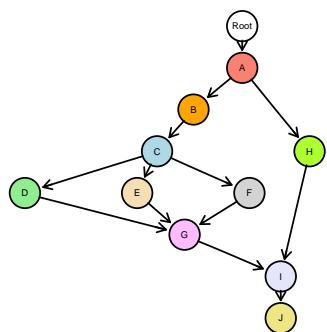

ID [d1i86X4sy10ttNPpW](#)  
 acc genotypes 25  
 peaks no back 1  
 removed edges 0  
 prop rem edges 0

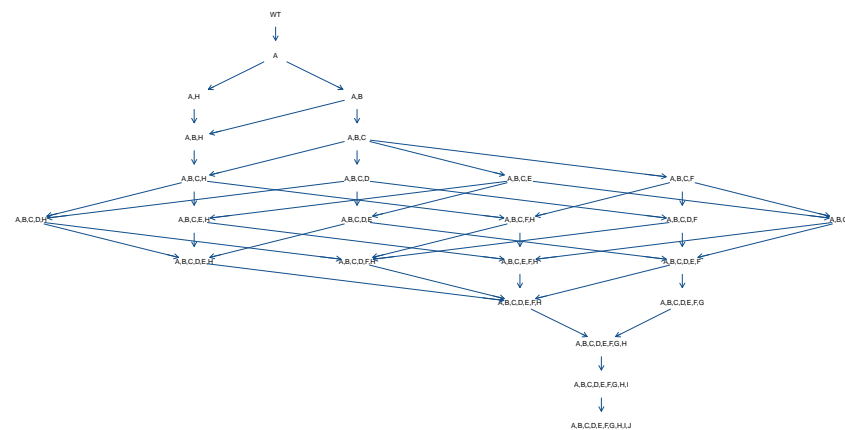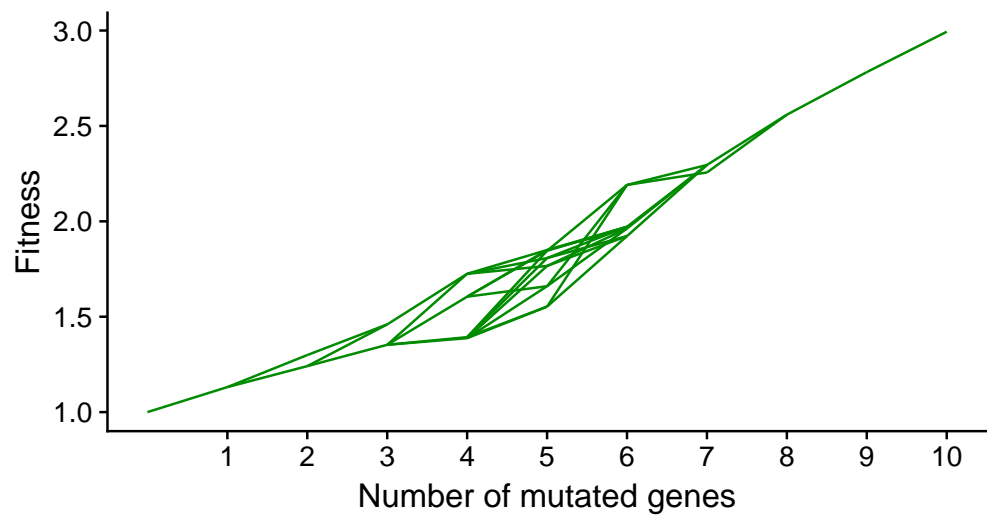

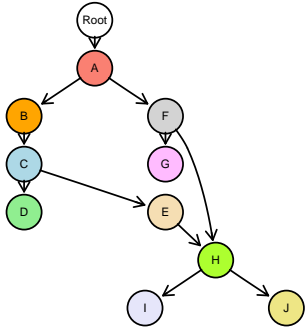

ID **D3yYb2Y5LZWHMIC9**  
 acc genotypes **35**  
 peaks no back 1  
 removed edges 0  
 prop rem edges 0

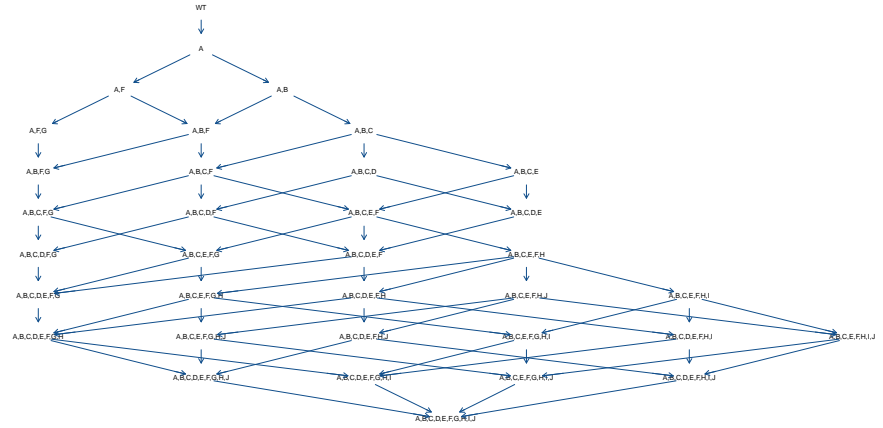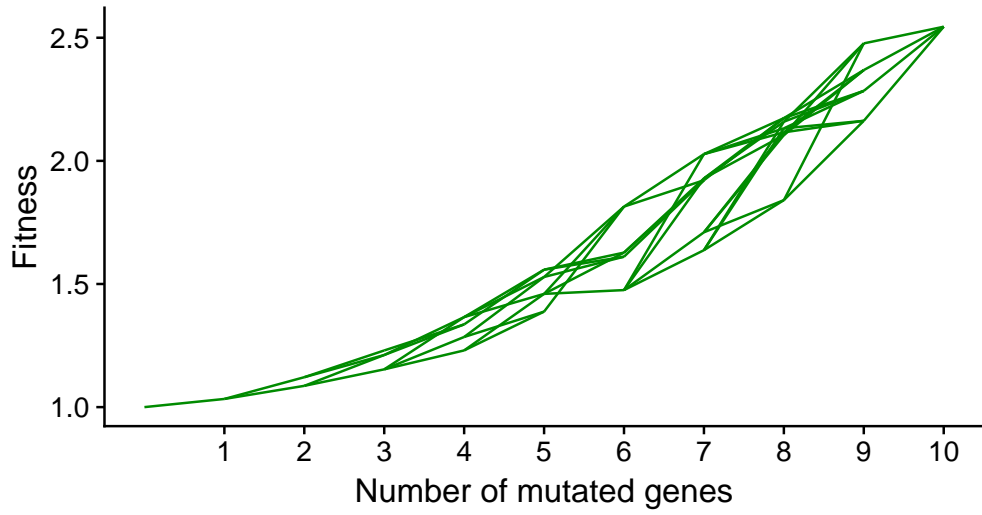

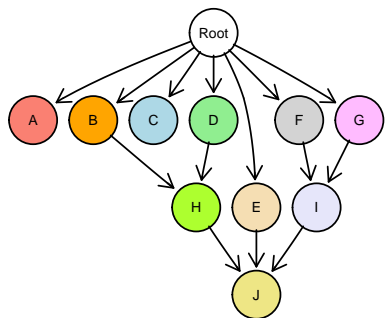

ID **DishuUtqtuc3gwclJ**  
 acc genotypes **204**  
 peaks no back 1  
 removed edges 0  
 prop rem edges 0

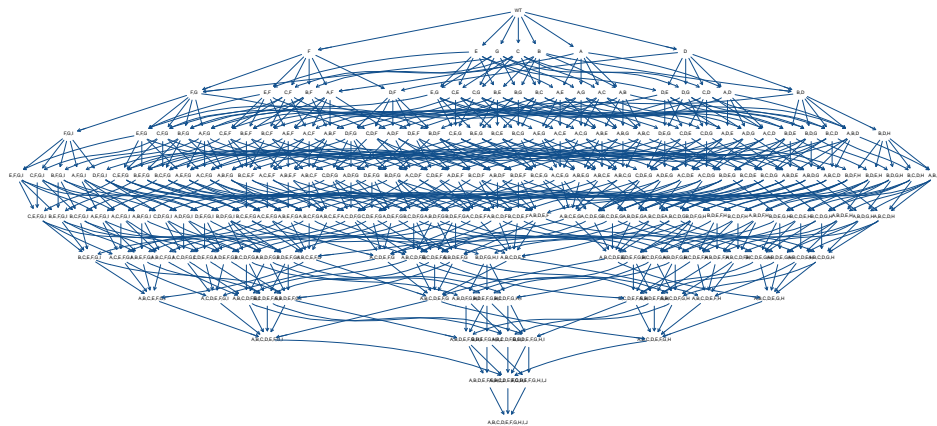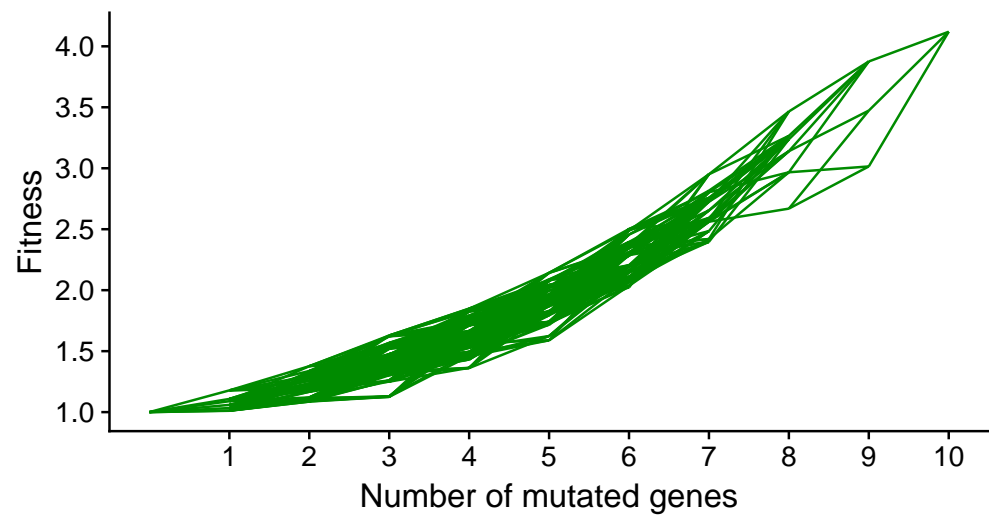

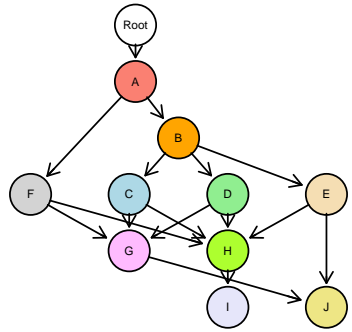

ID DLJ64zEF6RPBgmZU  
 acc genotypes 28  
 peaks no back 1  
 removed edges 0  
 prop rem edges 0

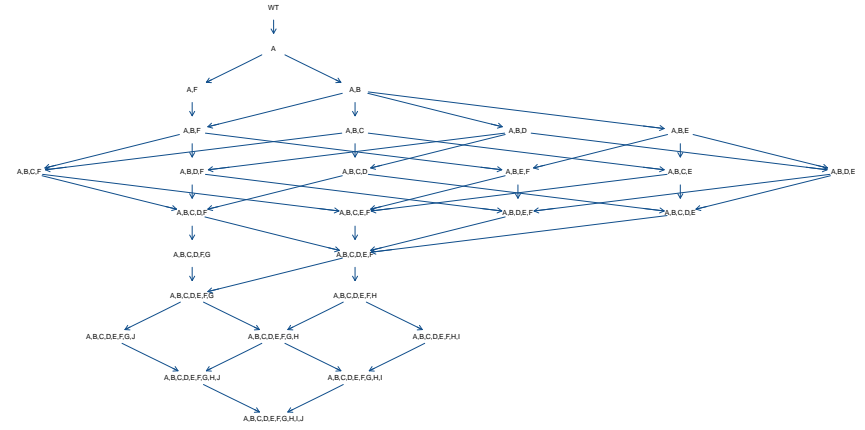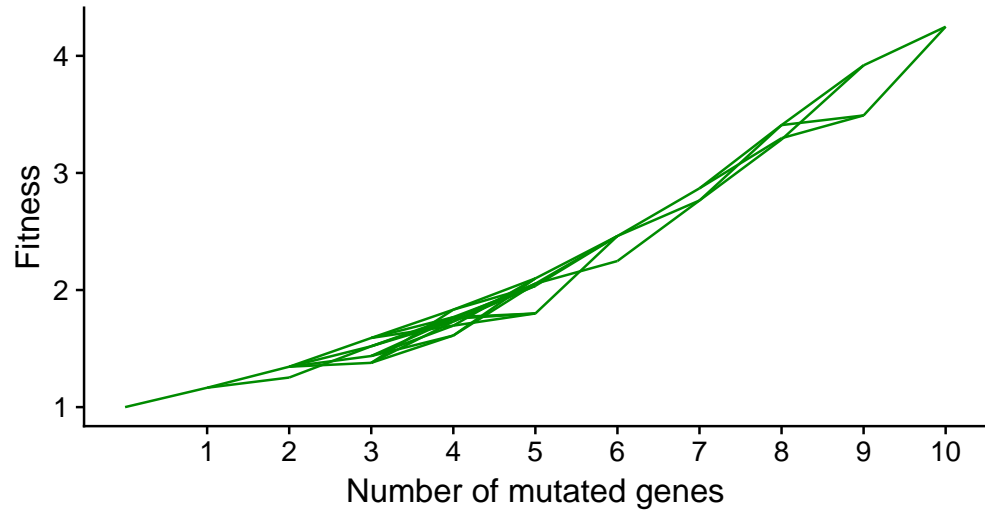

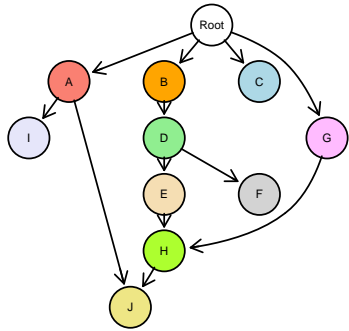

ID **dvBzM4I8nentNLyl**  
 acc genotypes **92**  
 peaks no back **1**  
 removed edges **0**  
 prop rem edges **0**

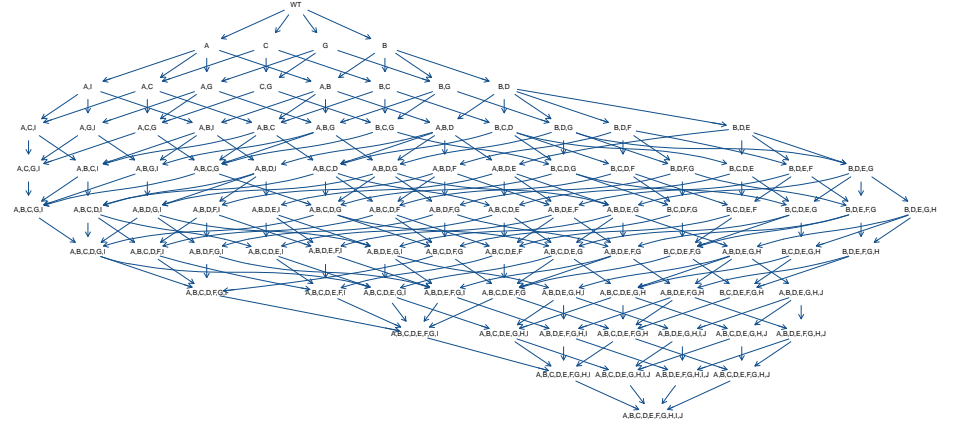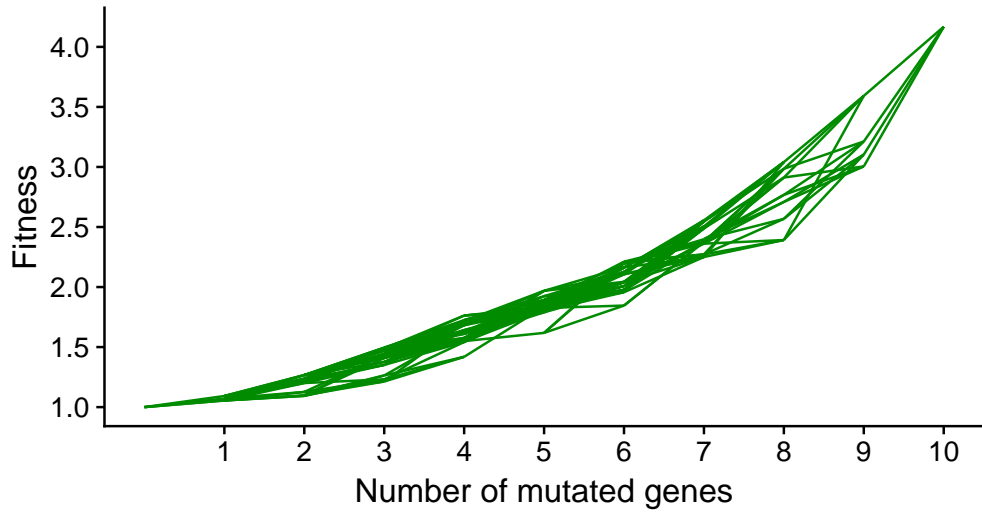

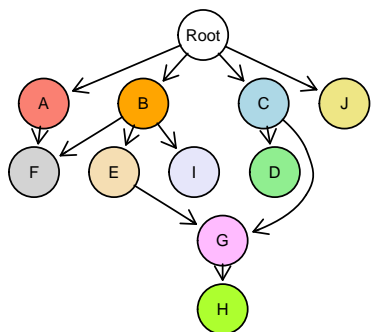

ID **dvQzUhETIIIrU97u**  
 acc genotypes **132**  
 peaks no back 1  
 removed edges 0  
 prop rem edges 0

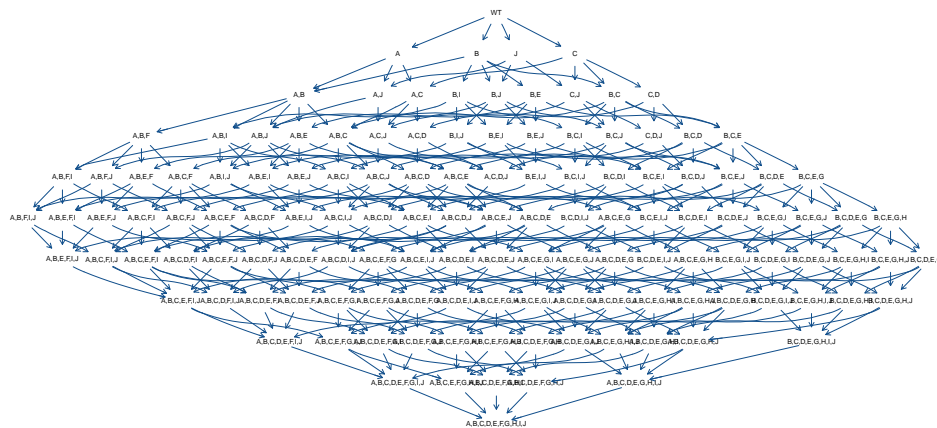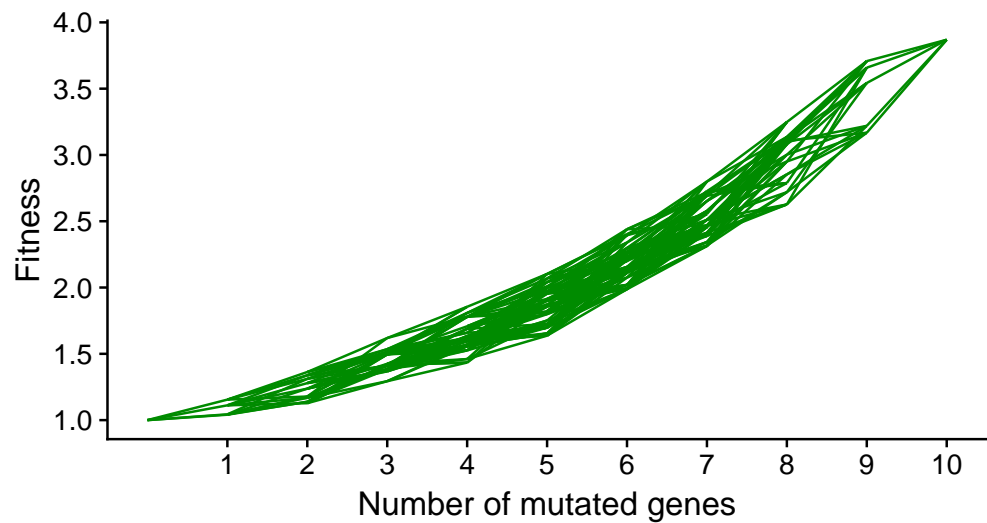

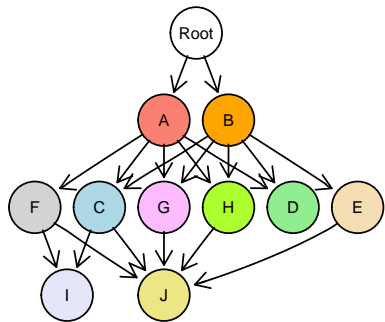

ID **EBt810tAFY9D105FkY**  
 acc genotypes **89**  
 peaks no back 1  
 removed edges 0  
 prop rem edges 0

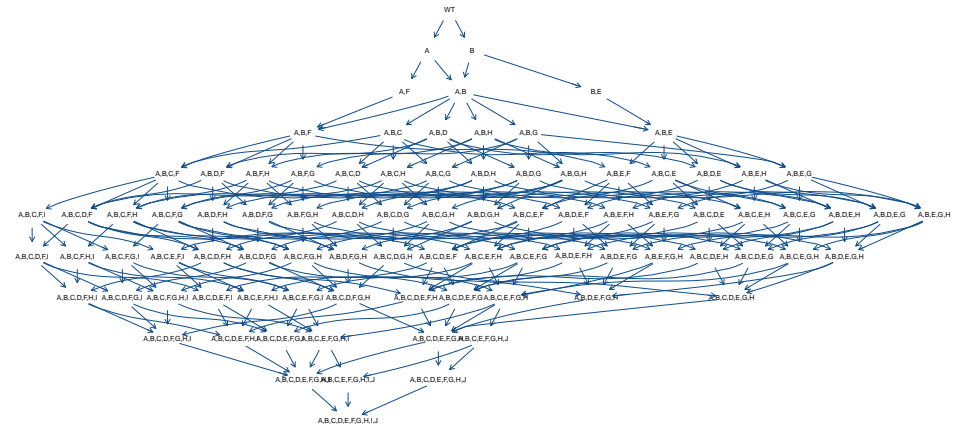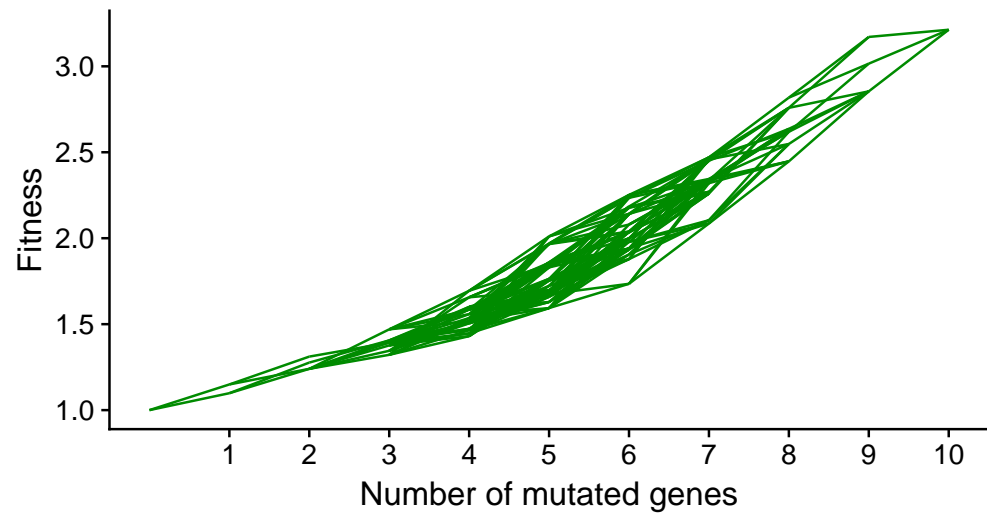



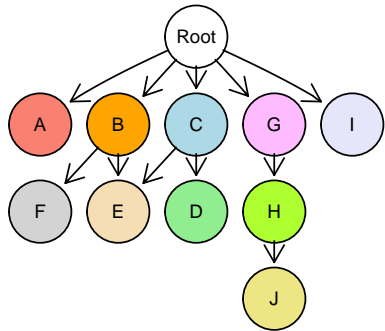

ID **ekTHm442hqA10IVJm**  
 acc genotypes **208**  
 peaks no back 1  
 removed edges 0  
 prop rem edges 0

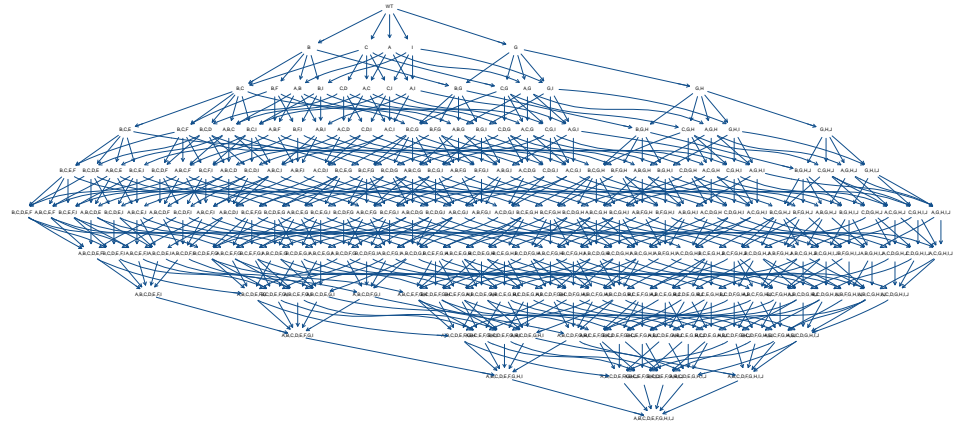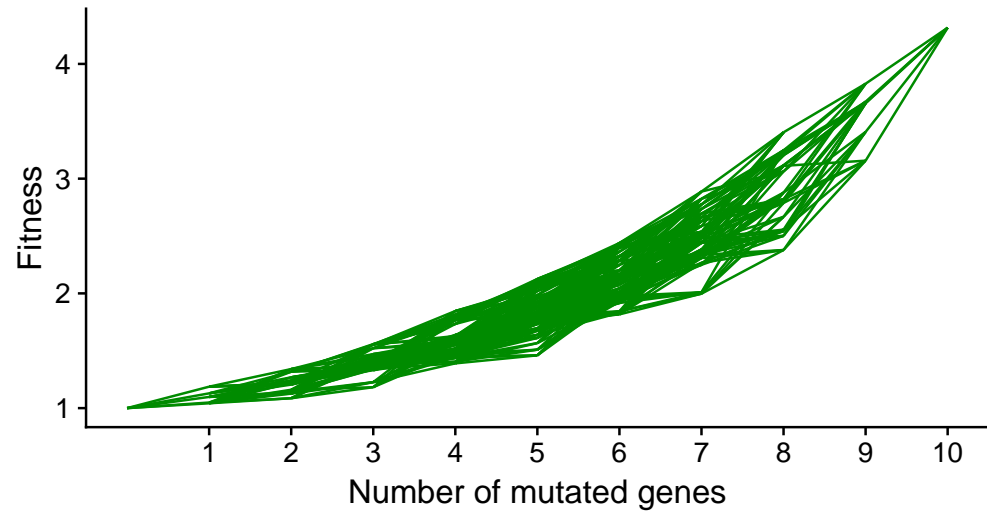

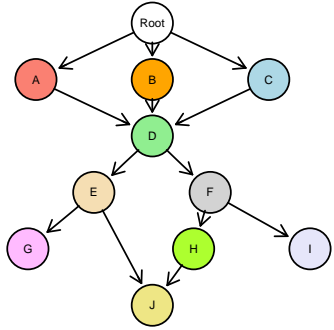

ID [EkuM7k8AJLiPR6hS](#)  
 acc genotypes 27  
 peaks no back 1  
 removed edges 0  
 prop rem edges 0

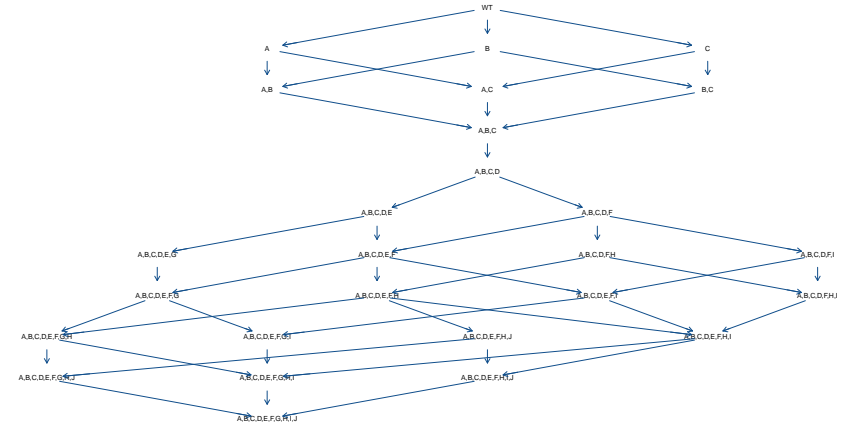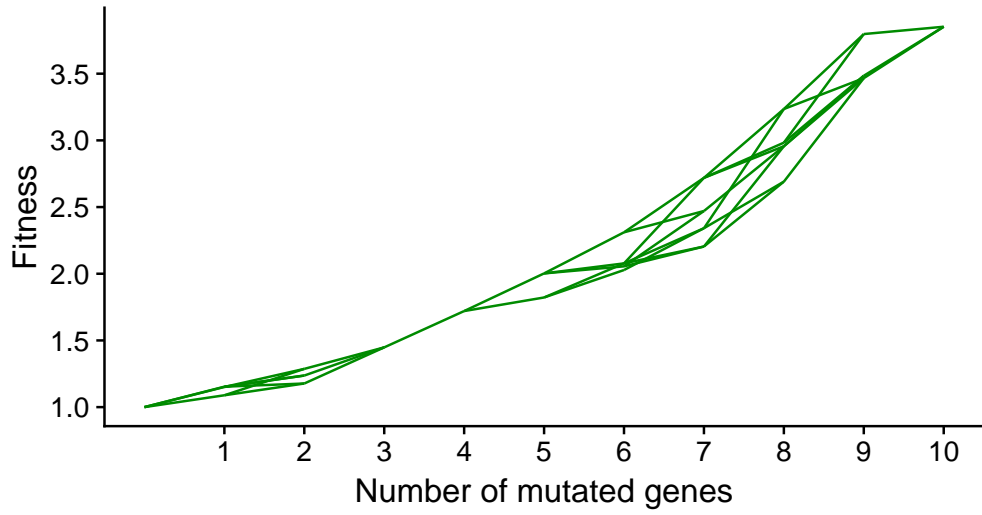

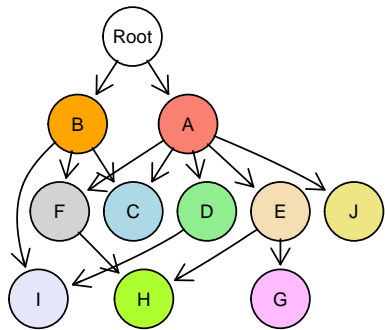

ID eNPbGhByo2yD8VoG  
 acc genotypes 110  
 peaks no back 1  
 removed edges 0  
 prop rem edges 0

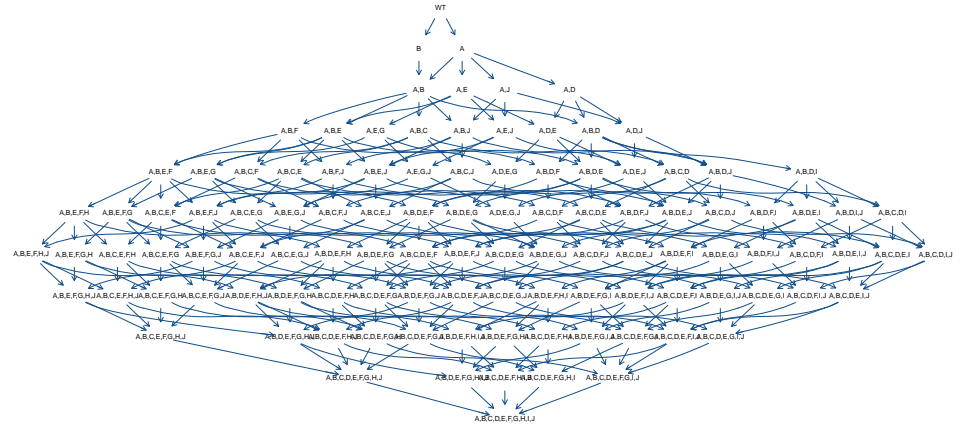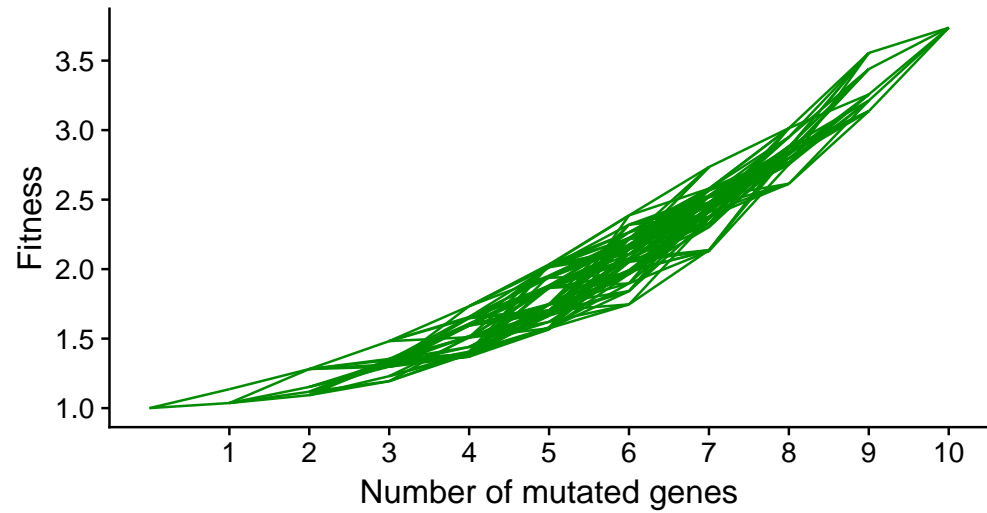

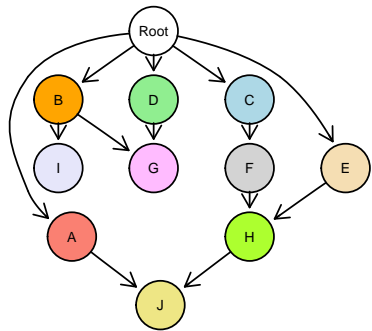

ID **EoCzYRJurCmFz168**  
 acc genotypes **120**  
 peaks no back 1  
 removed edges 0  
 prop rem edges 0

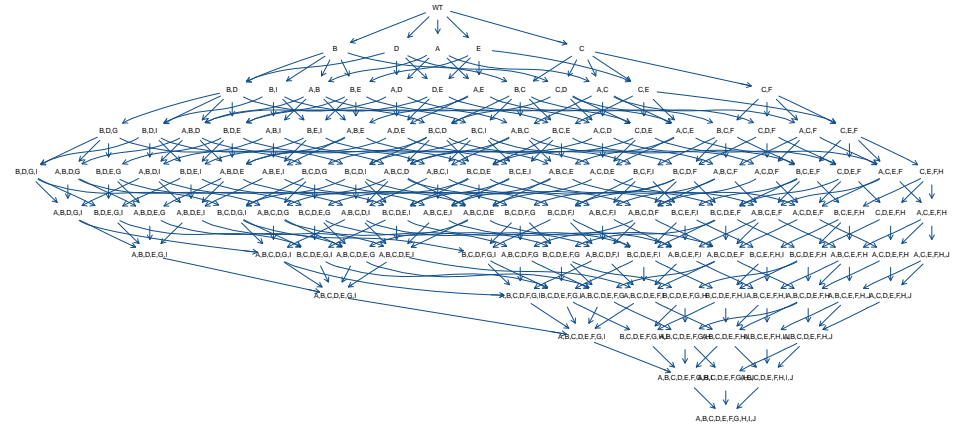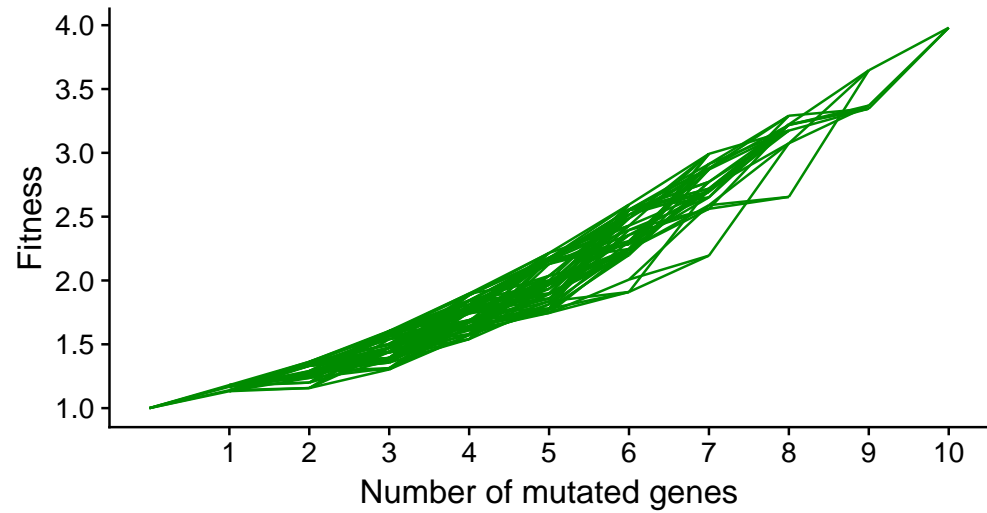

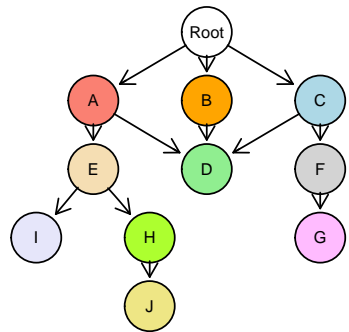

ID eOGzHUxNXJg7737x  
 acc genotypes 85  
 peaks no back 1  
 removed edges 0  
 prop rem edges 0

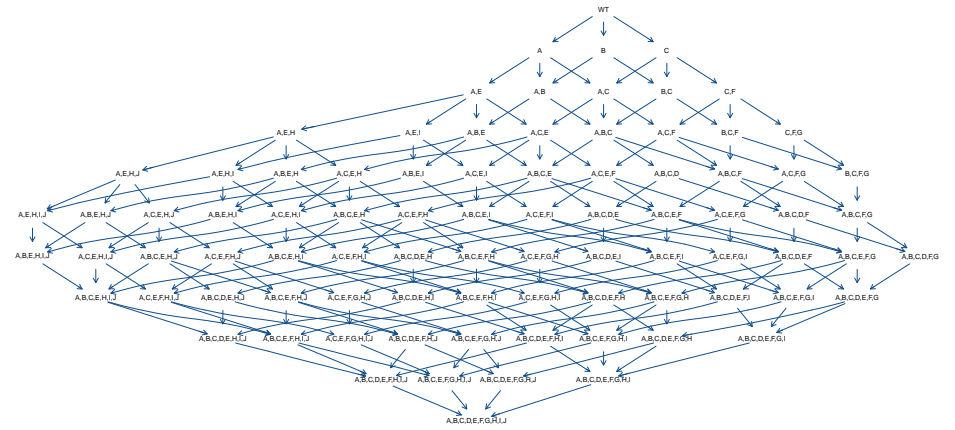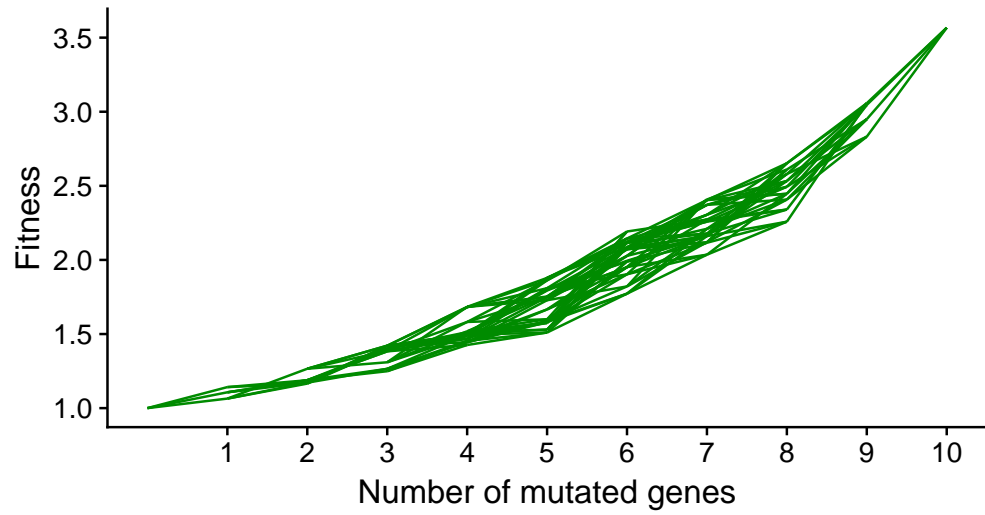

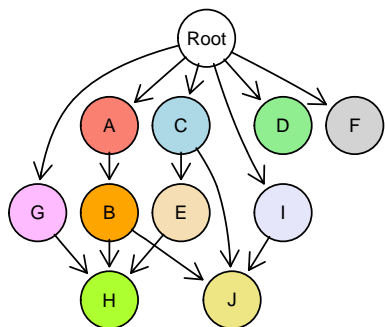

ID EScMp2k63ciS5e1  
 acc genotypes 172  
 peaks no back 1  
 removed edges 0  
 prop rem edges 0

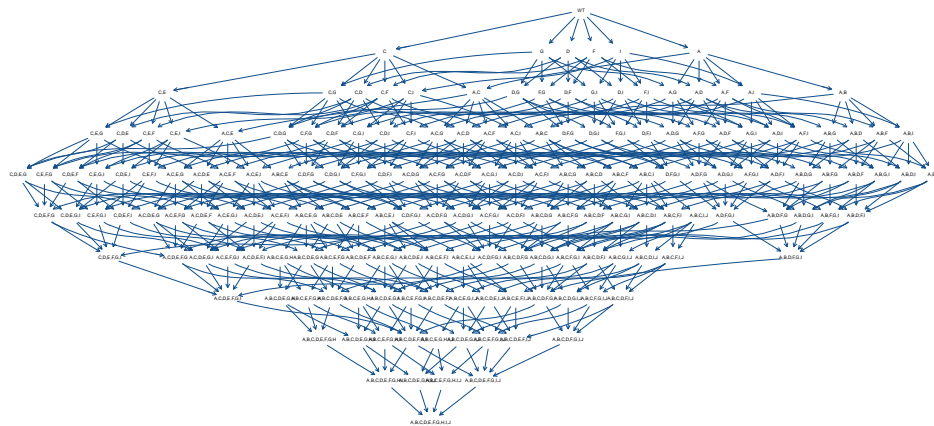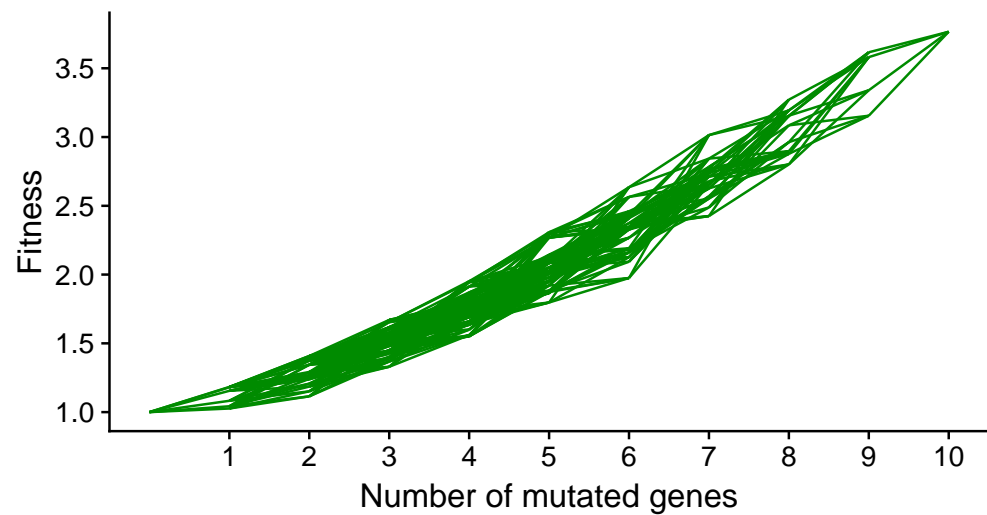

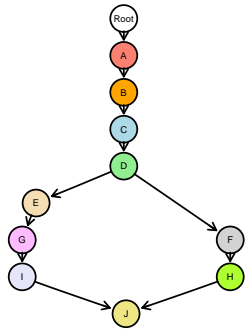

ID EUI10dI8bbHyhh4nE  
 acc genotypes 17  
 peaks no back 1  
 removed edges 0  
 prop rem edges 0

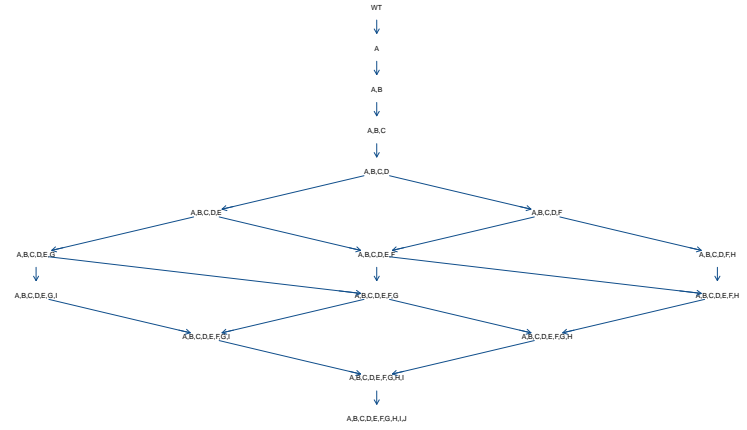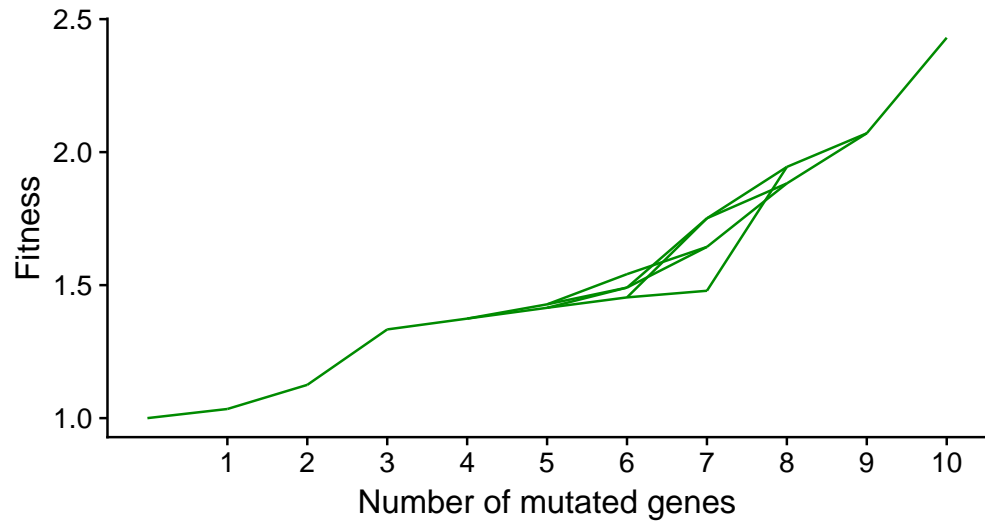

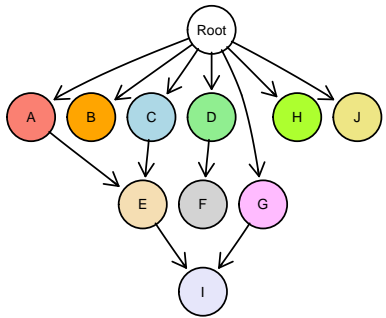

ID ExaZNcadWsiZp1os  
 acc genotypes 264  
 peaks no back 1  
 removed edges 0  
 prop rem edges 0

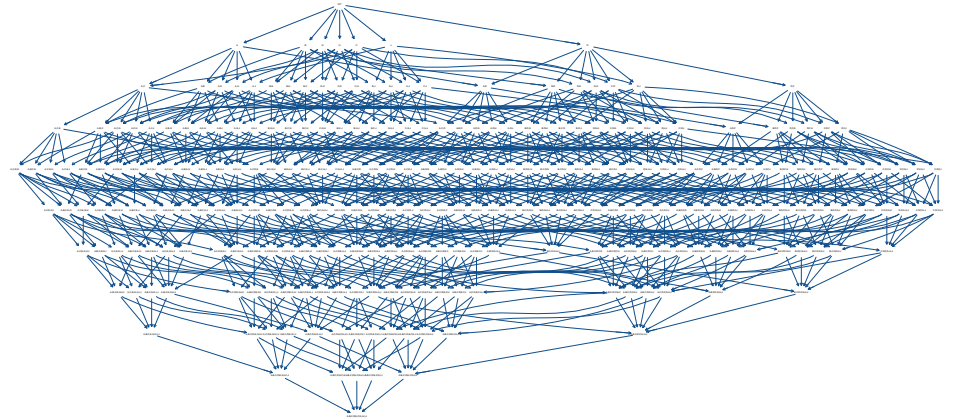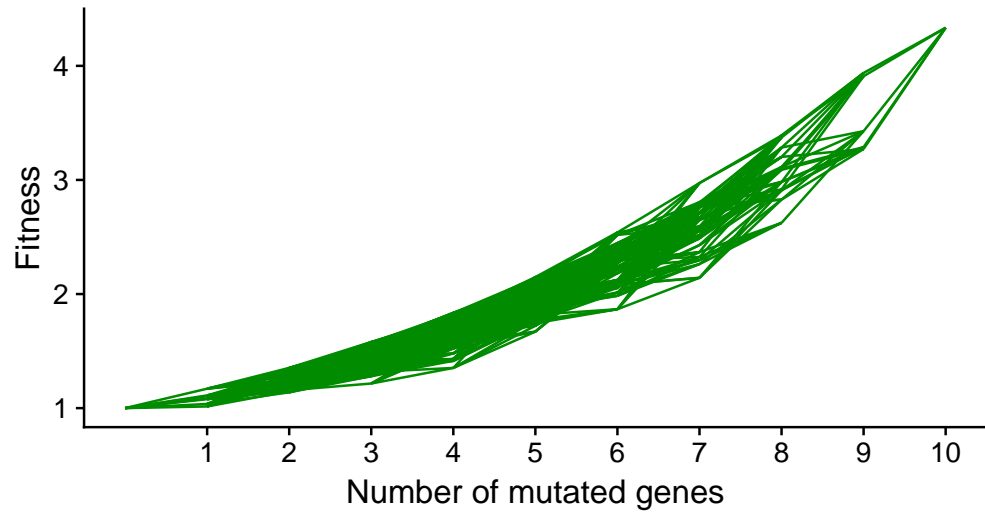



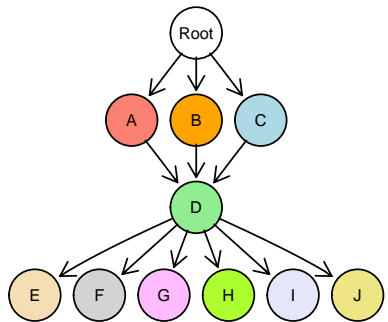

ID **F74OrUIE2JUNgUI10**  
 acc genotypes **72**  
 peaks no back 1  
 removed edges 0  
 prop rem edges 0

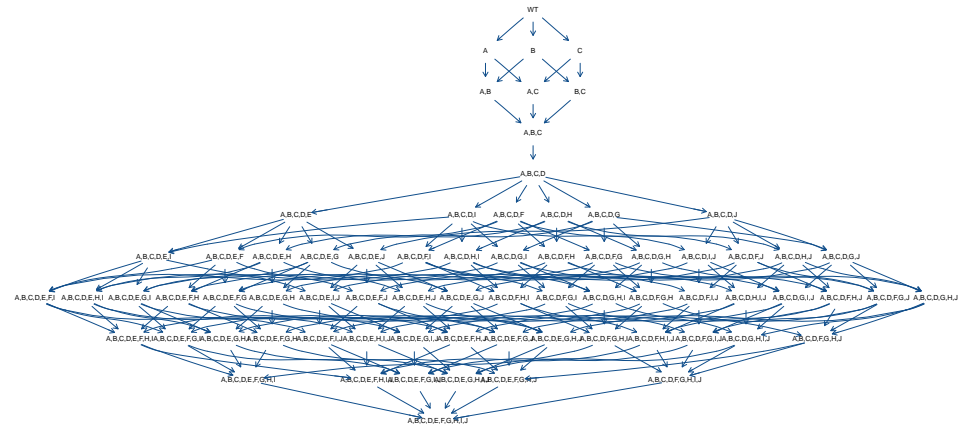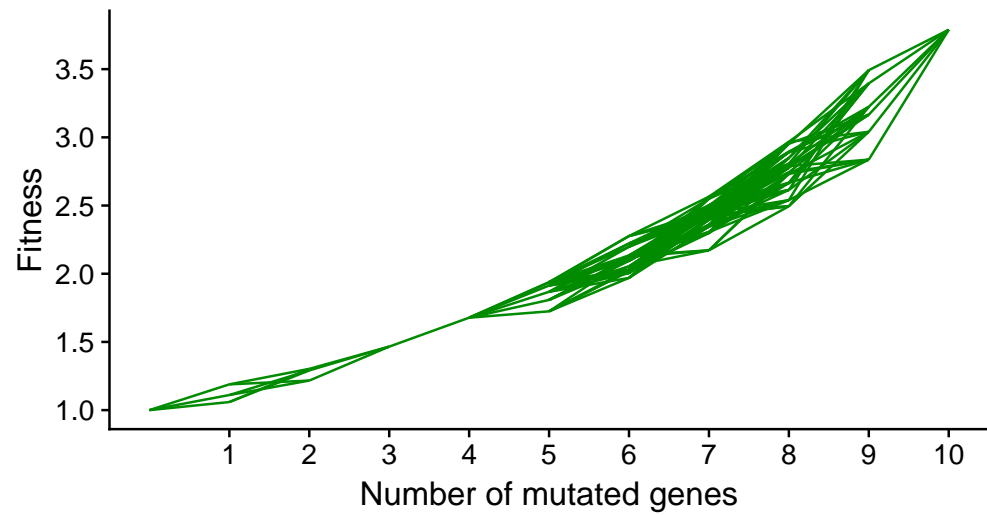

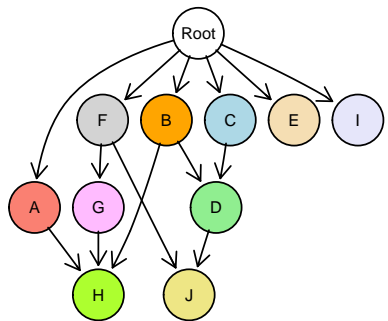

ID **fDVyfwz5EixVTGKI**  
 acc genotypes **152**  
 peaks no back 1  
 removed edges 0  
 prop rem edges 0

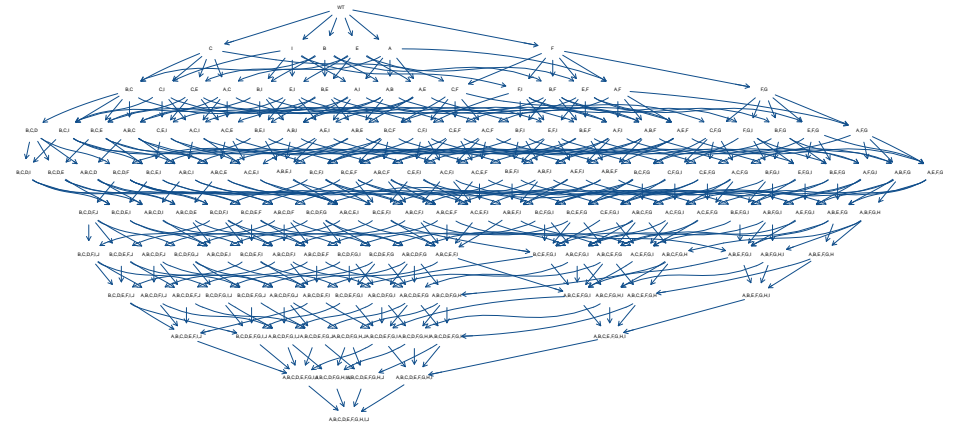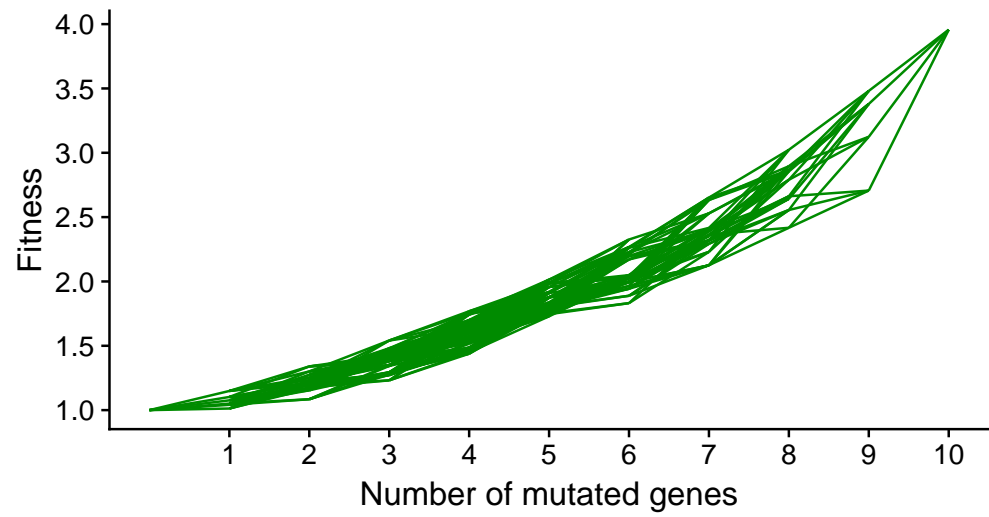

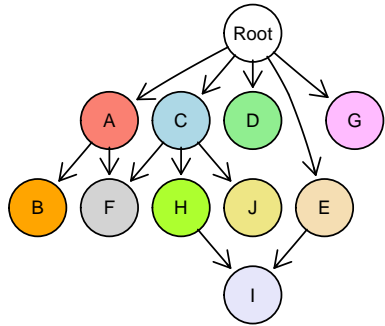

ID **FMa3on8bA8mNavrZ**  
 acc genotypes **224**  
 peaks no back 1  
 removed edges 0  
 prop rem edges 0

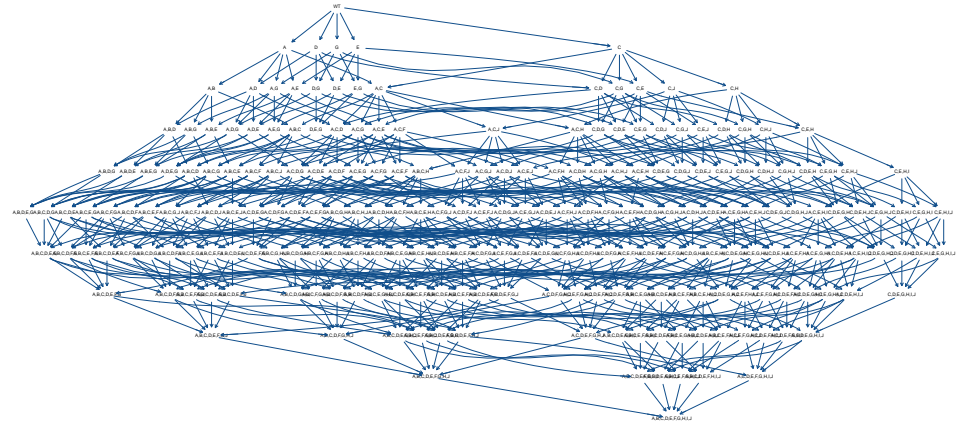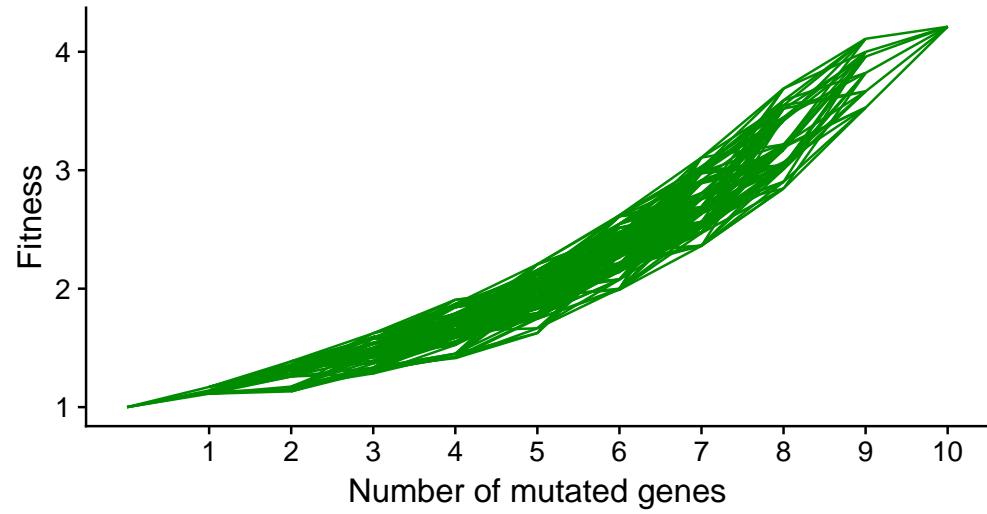

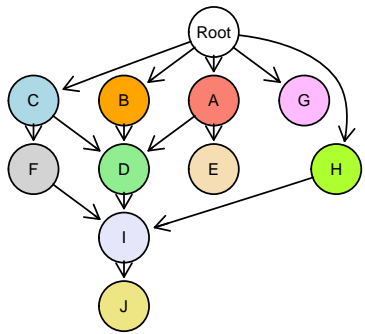

ID **Fsqw1LKsGEExuVa**  
 acc genotypes **96**  
 peaks no back 1  
 removed edges 0  
 prop rem edges 0

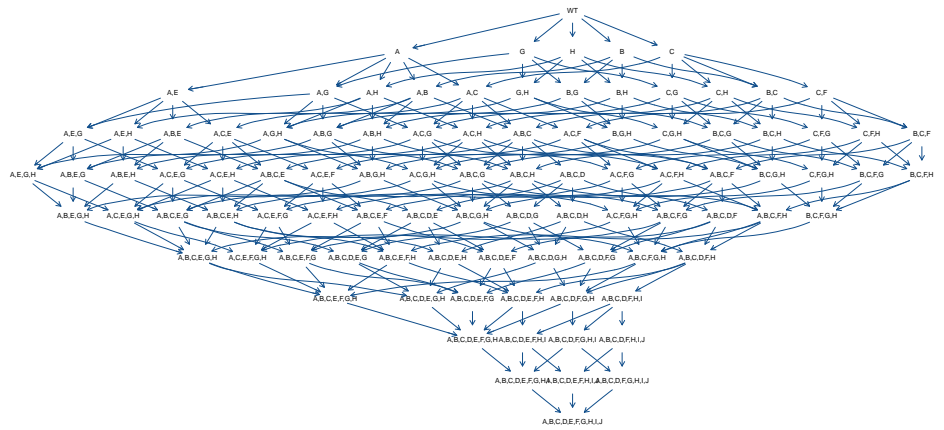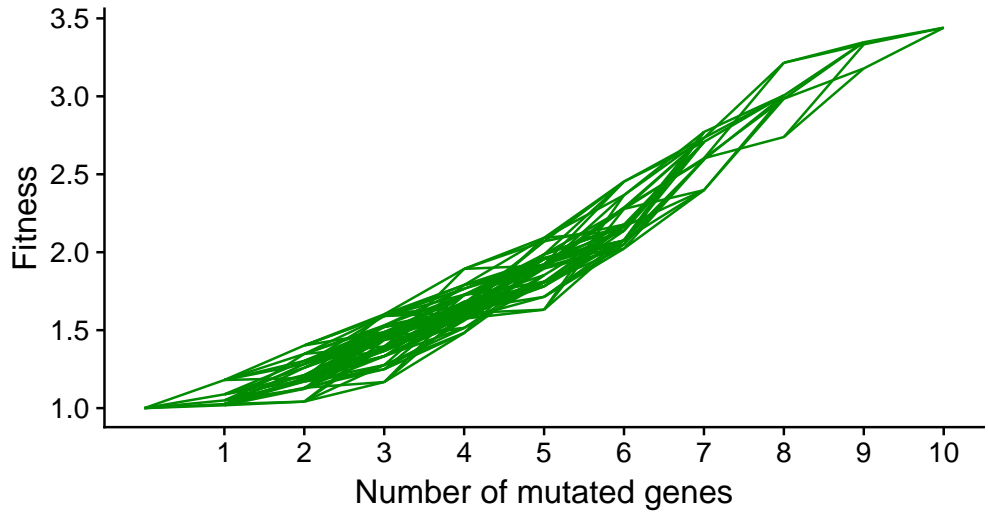

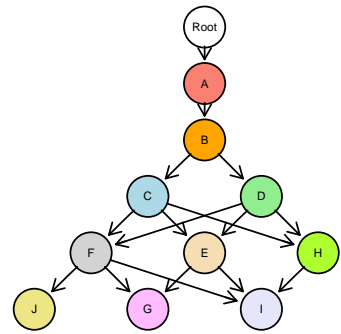

ID **FYcNi4WyweZ3YLZu**  
 acc genotypes **25**  
 peaks no back 1  
 removed edges 0  
 prop rem edges 0

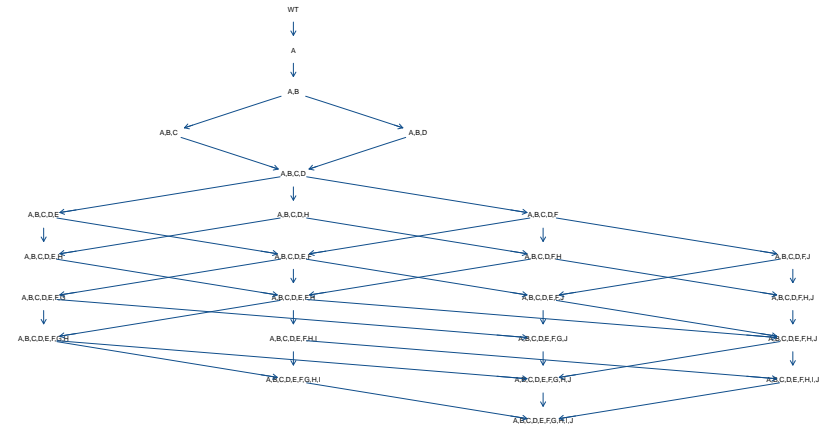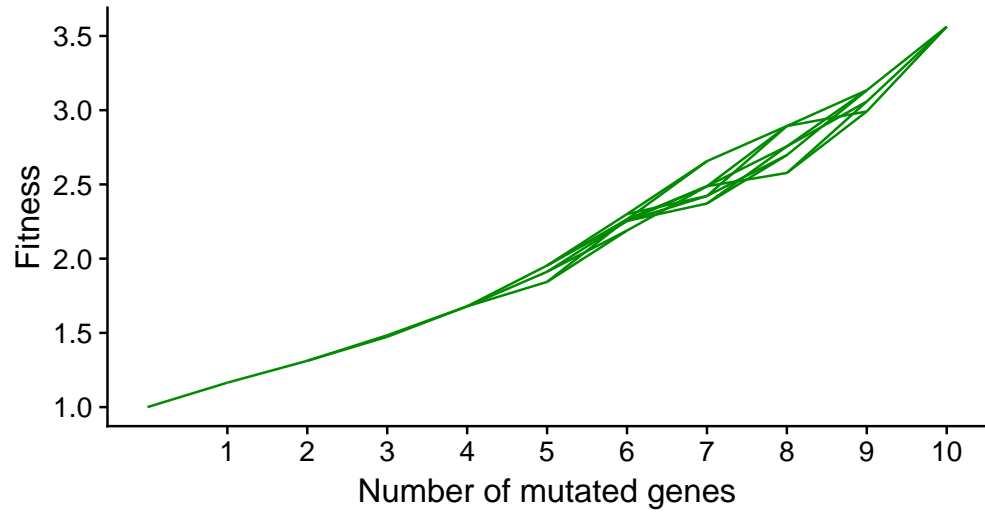

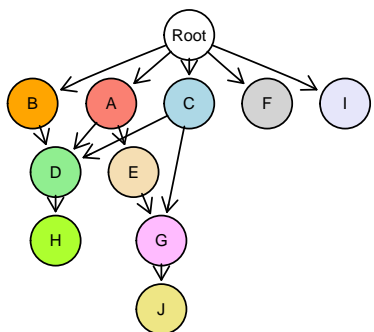

ID G3GJ10gesv99QKDi  
 acc genotypes 96  
 peaks no back 1  
 removed edges 0  
 prop rem edges 0

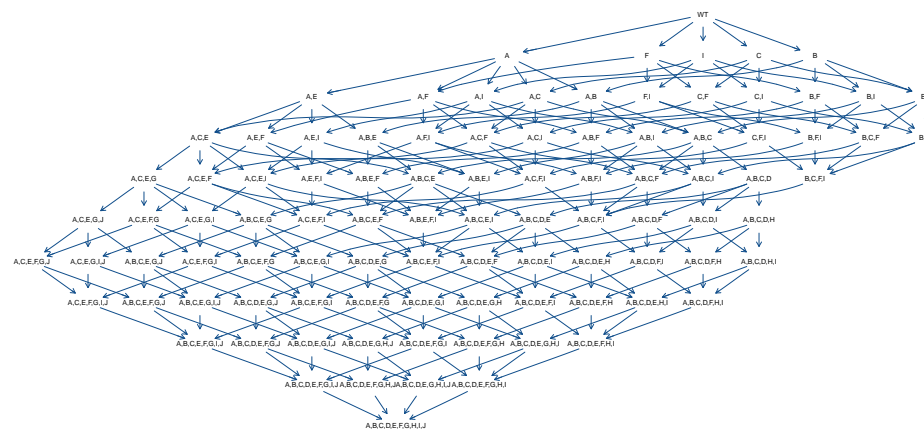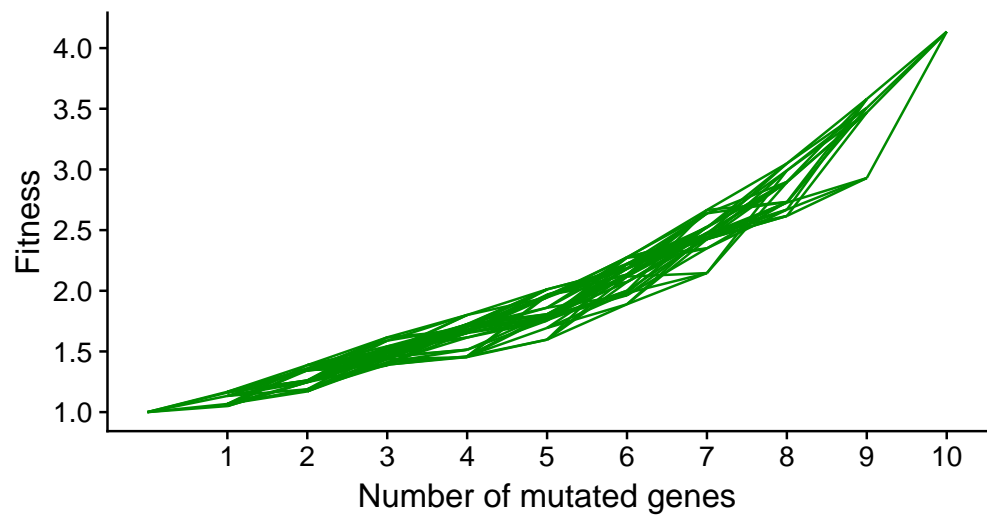

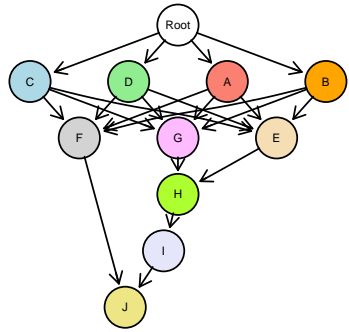

ID **gcBjSEP8ZTo7NX2w**  
 acc genotypes **28**  
 peaks no back 1  
 removed edges 0  
 prop rem edges 0

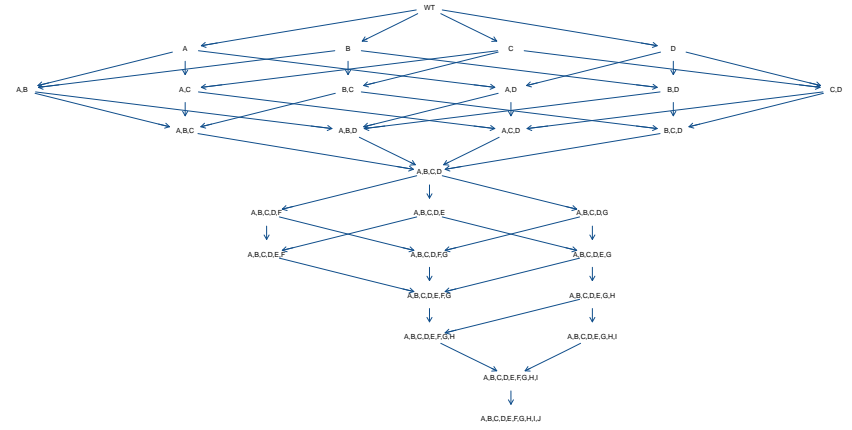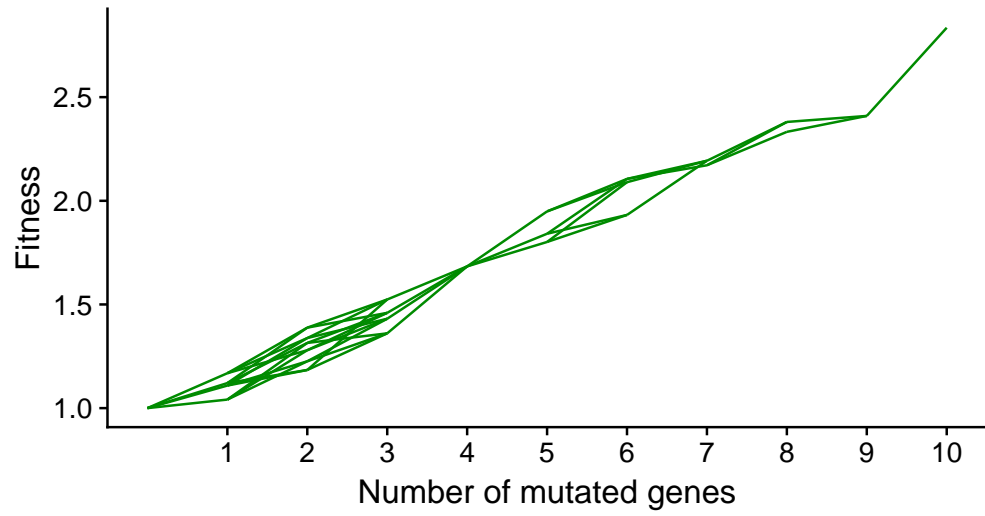

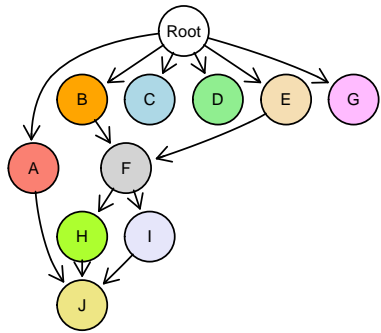

ID GdKyxu7pbMBmXsha  
 acc genotypes 136  
 peaks no back 1  
 removed edges 0  
 prop rem edges 0

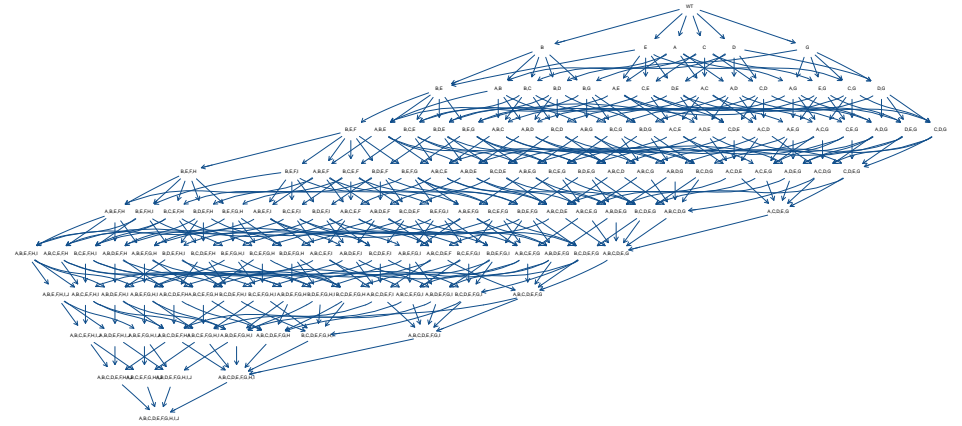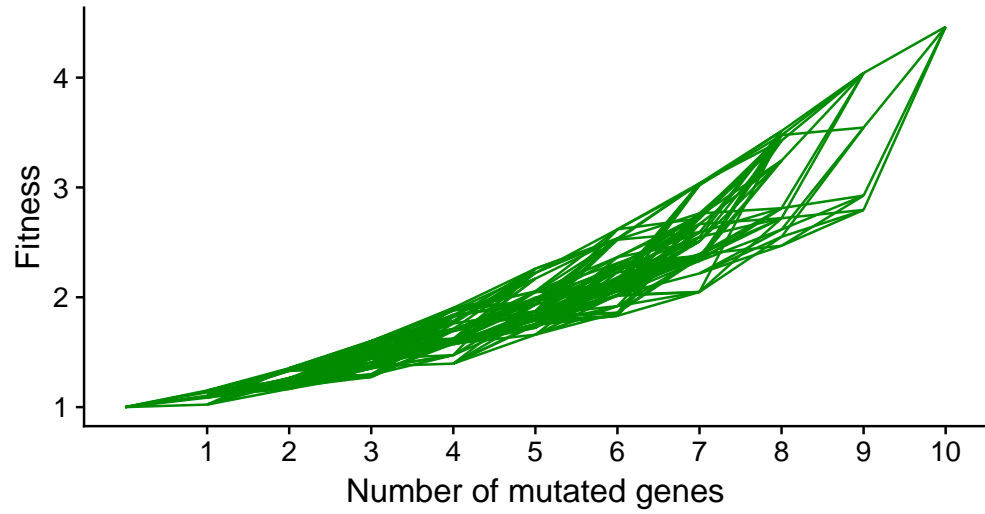



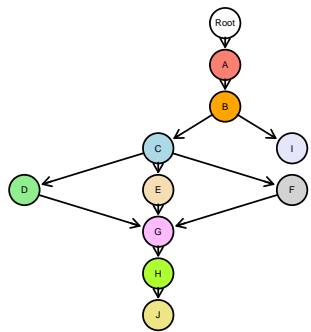

ID **GDWChzATMq5hpozJ**  
 acc genotypes **26**  
 peaks no back 1  
 removed edges 0  
 prop rem edges 0

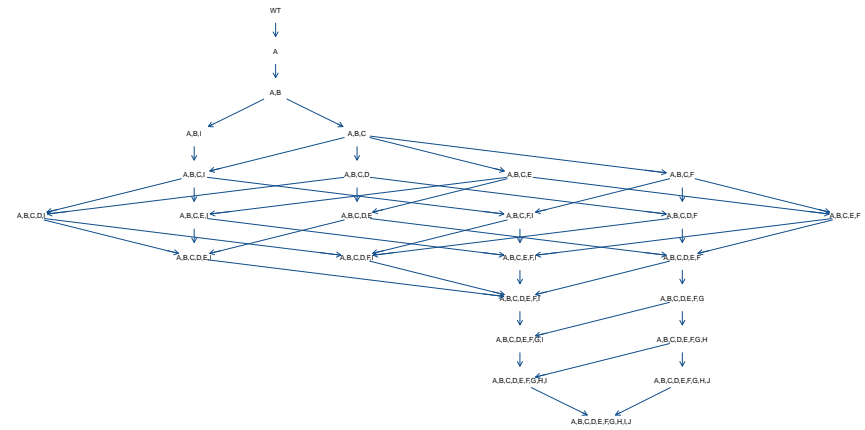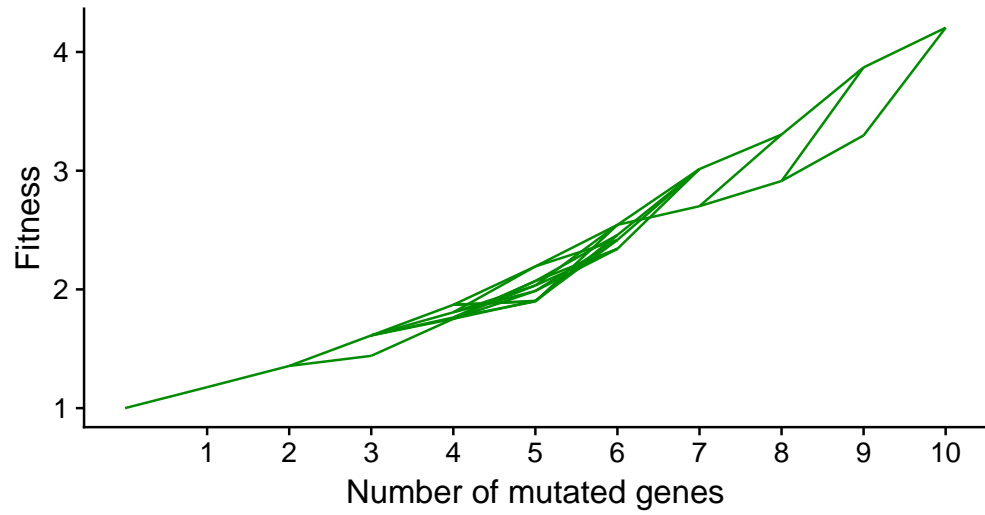

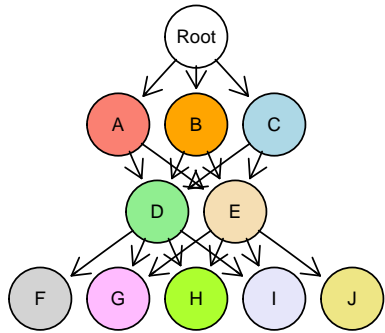

ID [gNDvHs3jYcerc7I](#)  
 acc genotypes 44  
 peaks no back 1  
 removed edges 0  
 prop rem edges 0

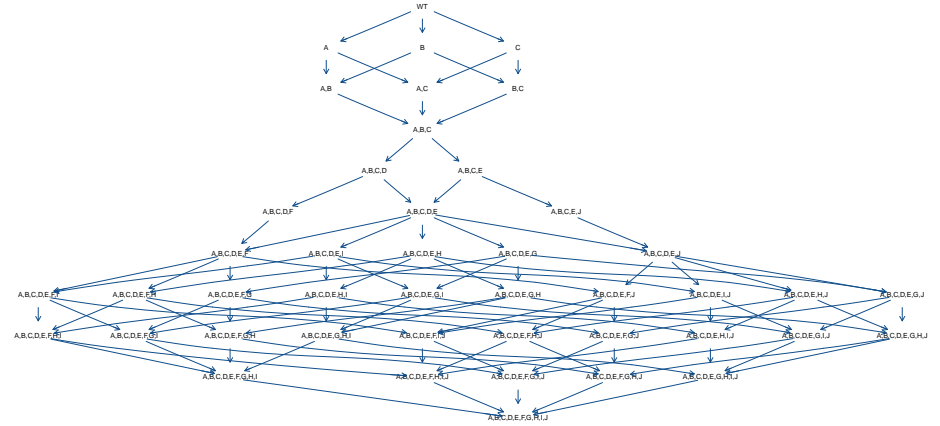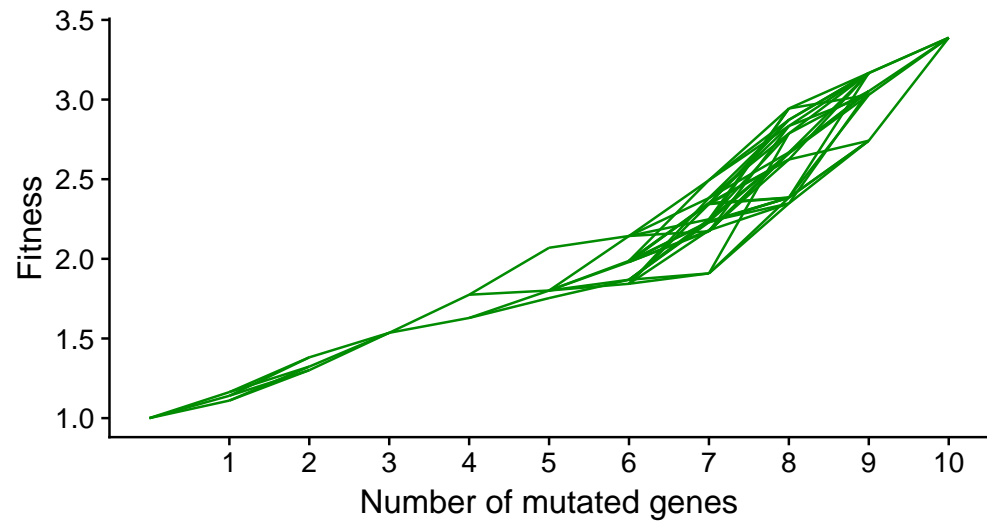

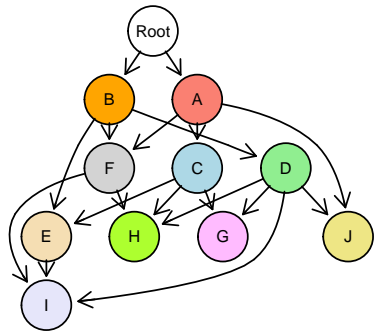

ID [gqmarqZNpxa6L2Zx](#)  
 acc genotypes 47  
 peaks no back 1  
 removed edges 0  
 prop rem edges 0

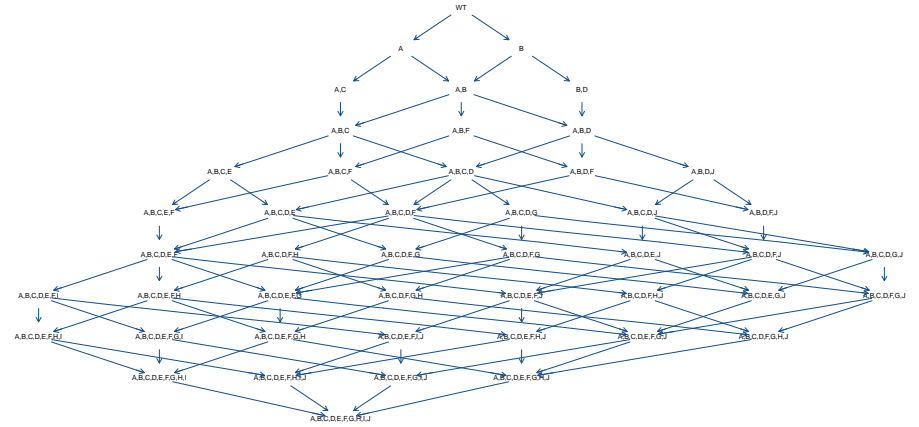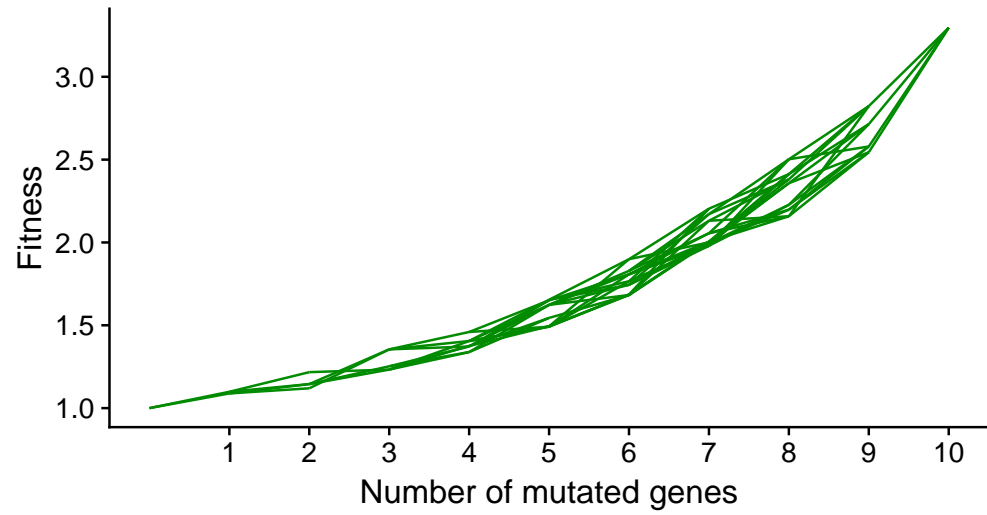

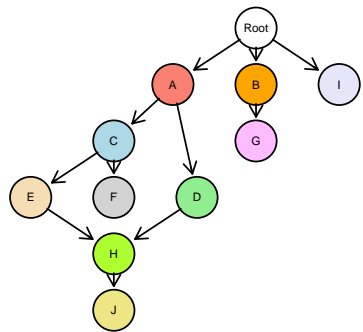

ID **gYZAxs6hKIMQf3Ca**  
 acc genotypes **90**  
 peaks no back 1  
 removed edges 0  
 prop rem edges 0

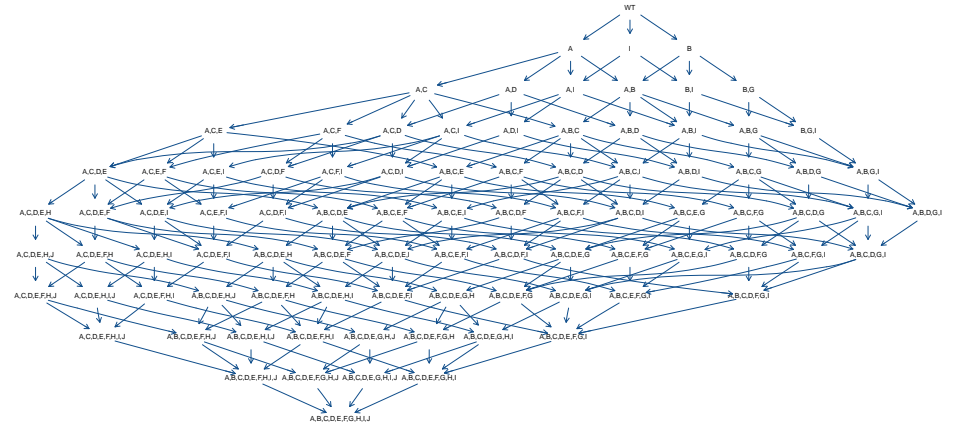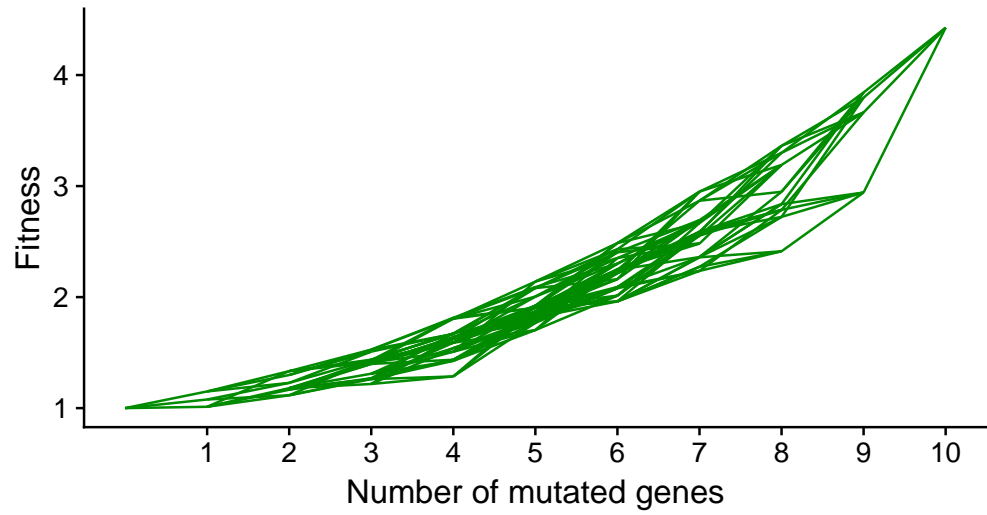





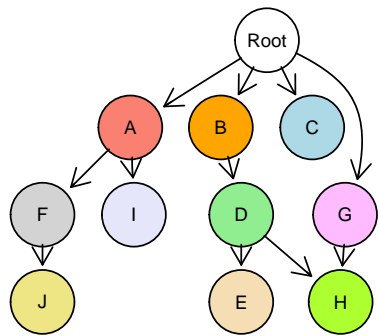

ID **hB10YoS6mVpFbv6aL**  
 acc genotypes **140**  
 peaks no back 1  
 removed edges 0  
 prop rem edges 0

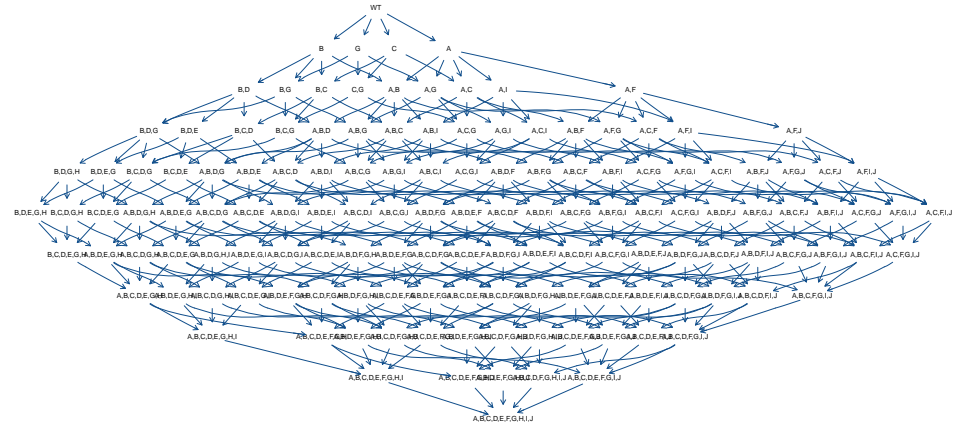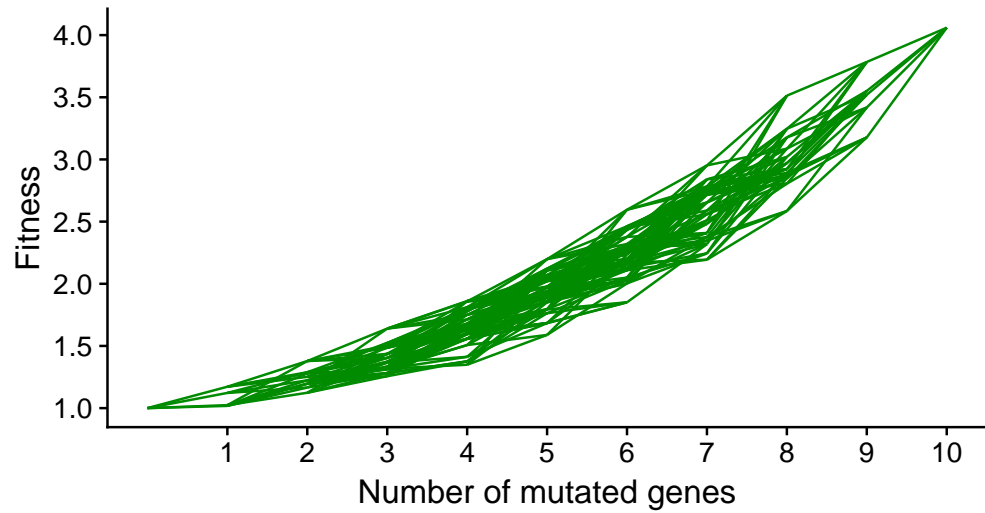

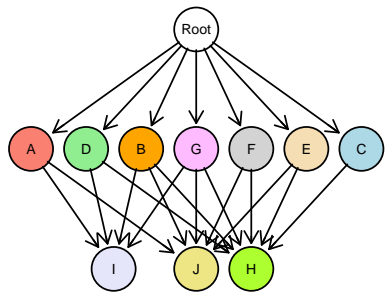

ID **hilmr3F710LYpQsGL**  
 acc genotypes **147**  
 peaks no back 1  
 removed edges 0  
 prop rem edges 0

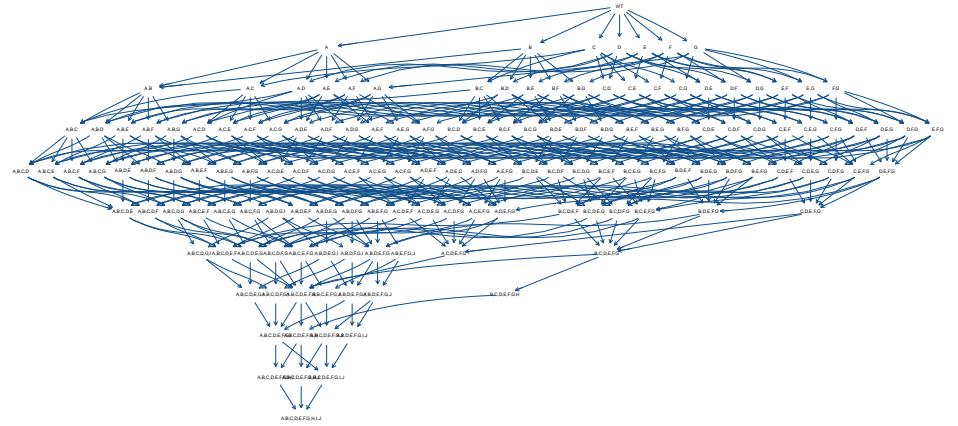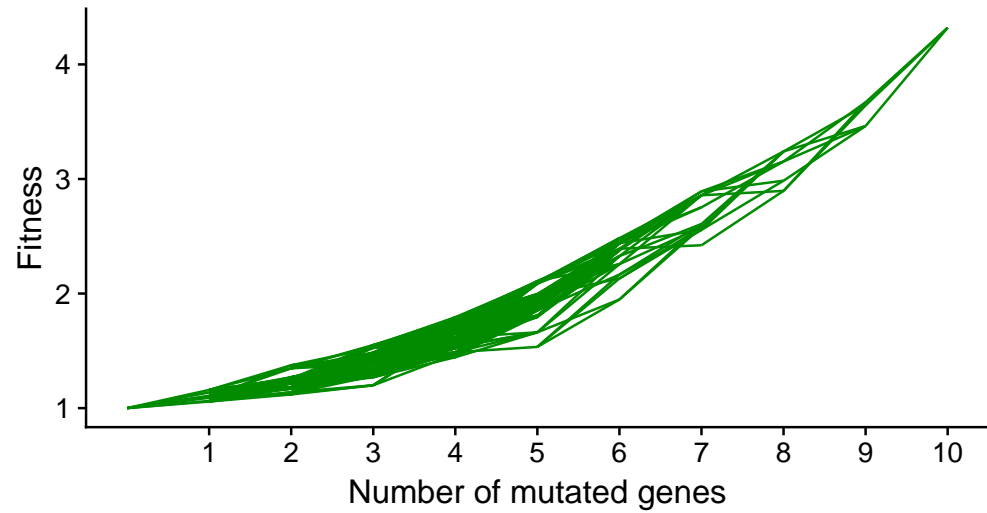





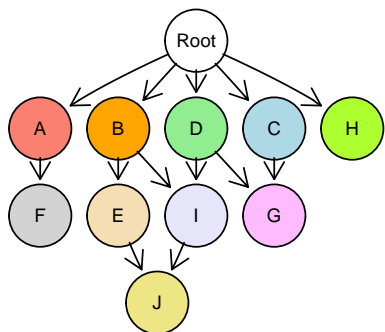

ID **HnZ10pnWSr3M1MXbv**  
 acc genotypes **144**  
 peaks no back 1  
 removed edges 0  
 prop rem edges 0

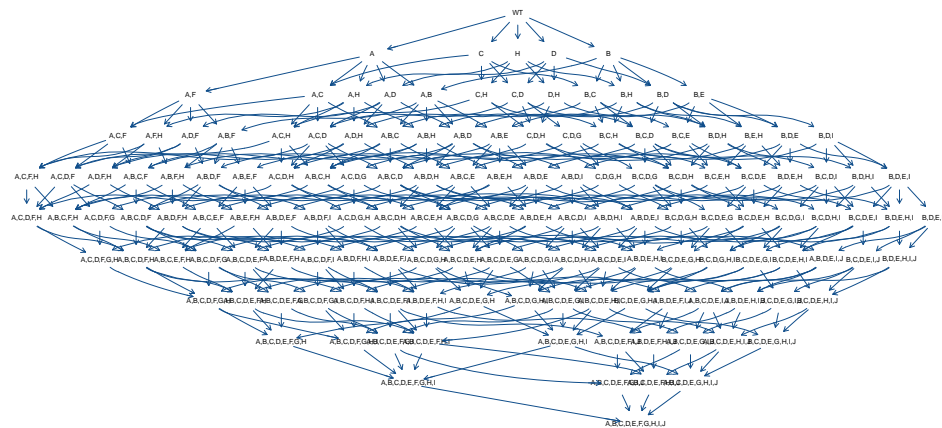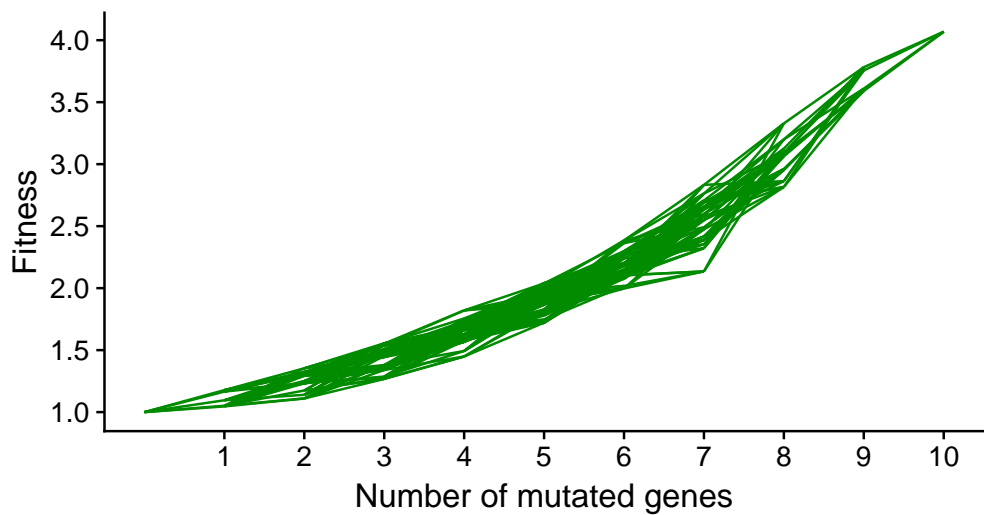

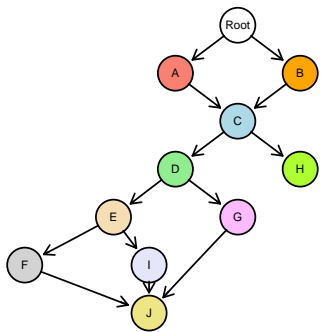

ID **Hon2Ud6RNbFJ826U**  
 acc genotypes **28**  
 peaks no back 1  
 removed edges 0  
 prop rem edges 0

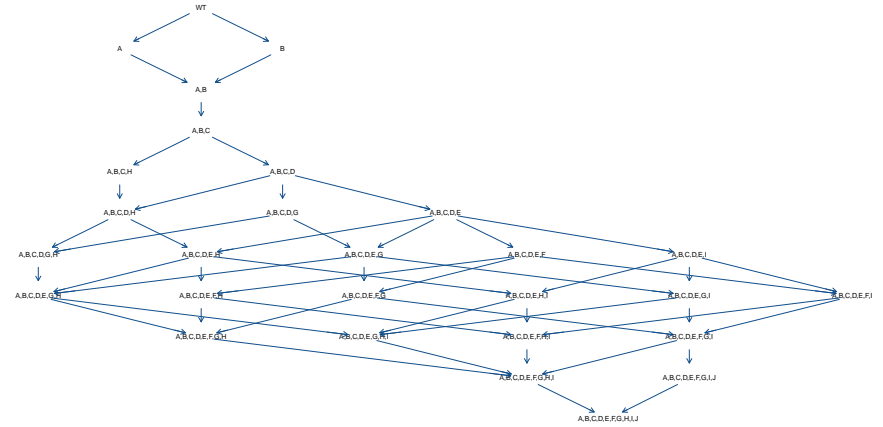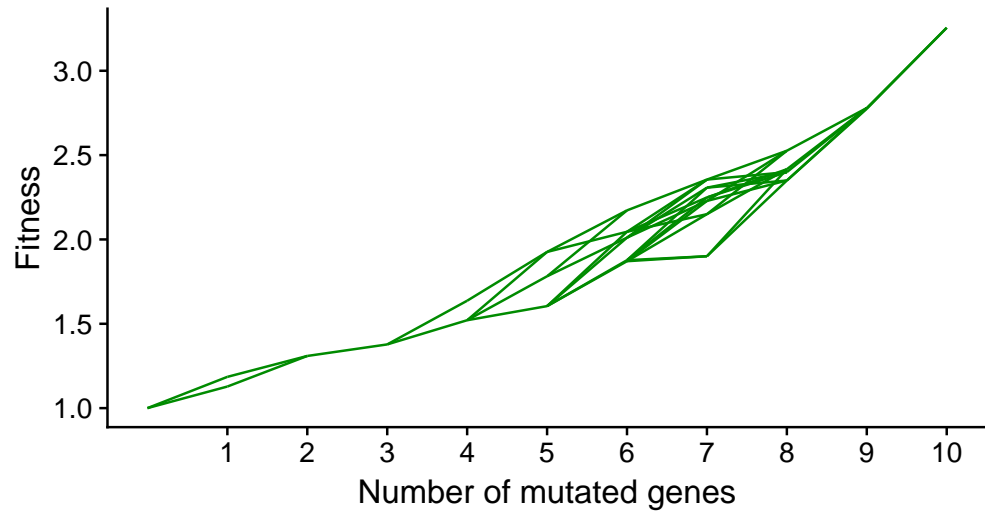

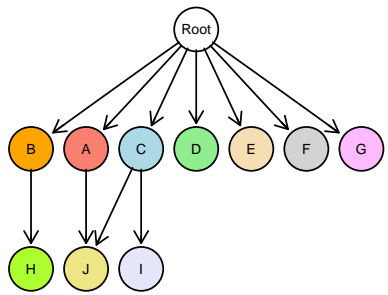

ID **hqhSp8AzeBqMadTe**  
 acc genotypes **384**  
 peaks no back 1  
 removed edges 0  
 prop rem edges 0

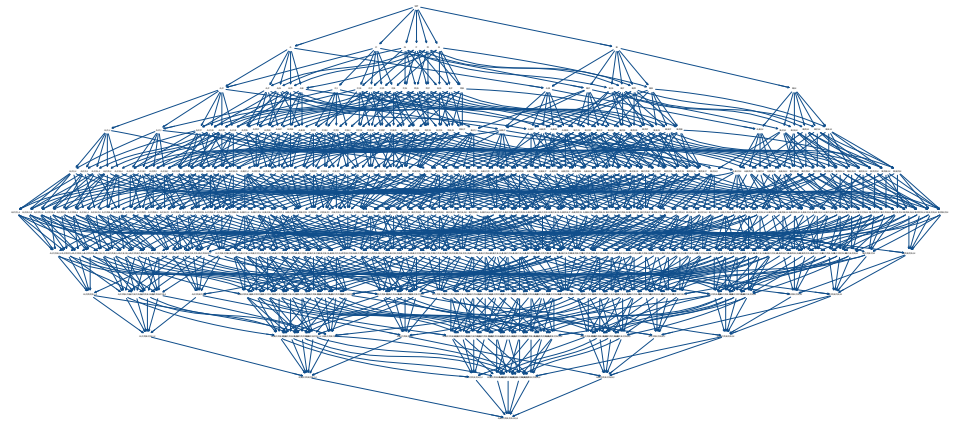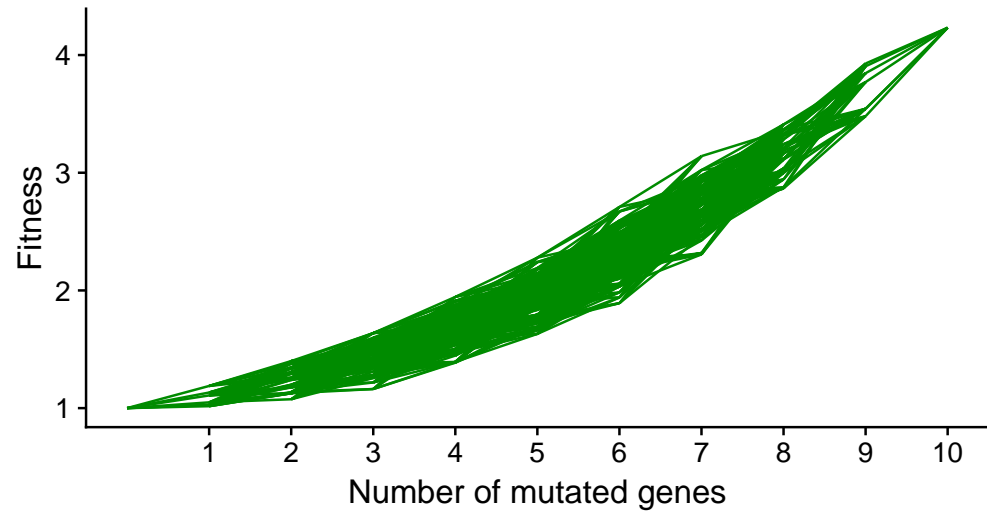

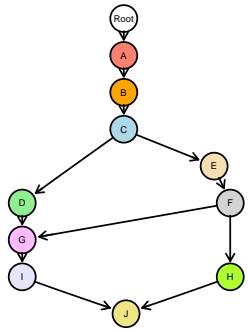

ID hshAK10qbNh6UkHAB  
 acc genotypes 16  
 peaks no back 1  
 removed edges 0  
 prop rem edges 0

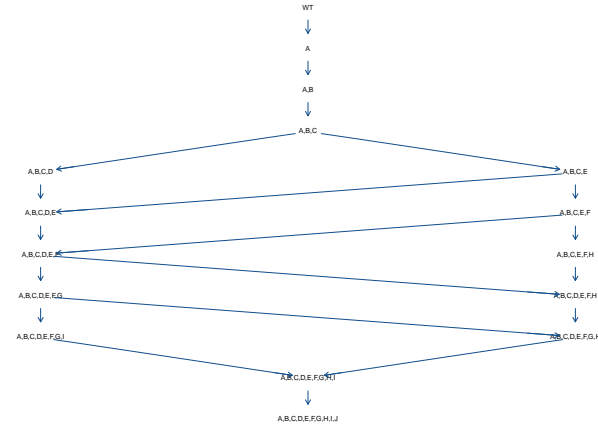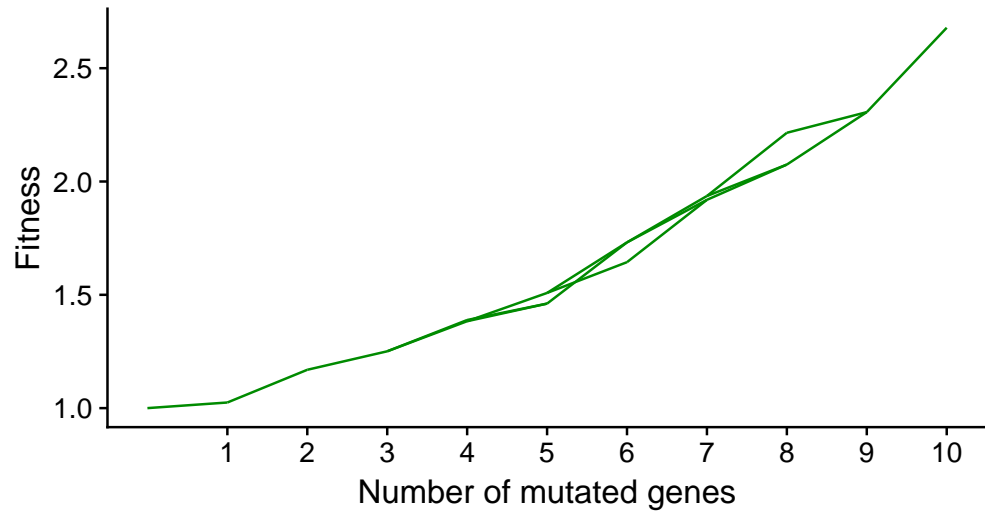

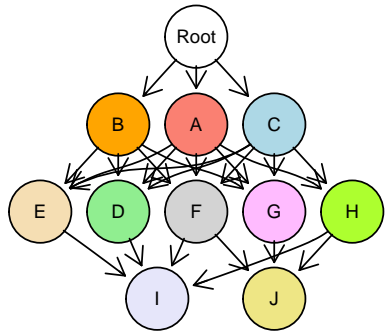

ID HXhpKGzcwUfLLeF  
 acc genotypes 47  
 peaks no back 1  
 removed edges 0  
 prop rem edges 0

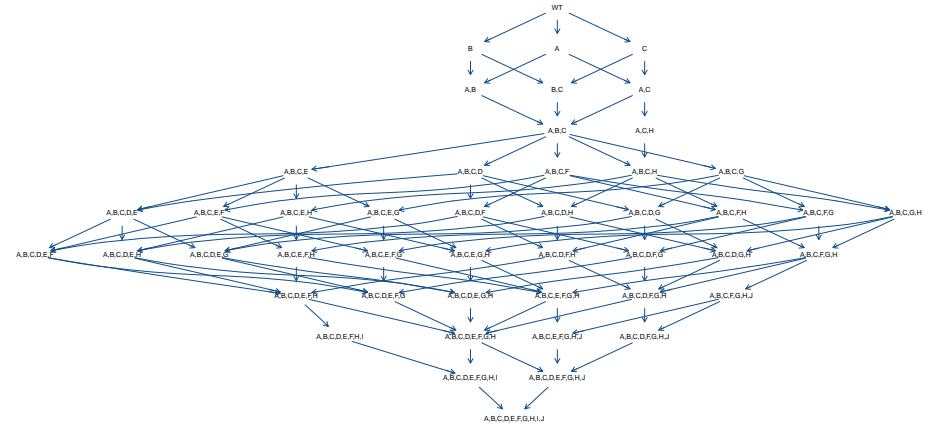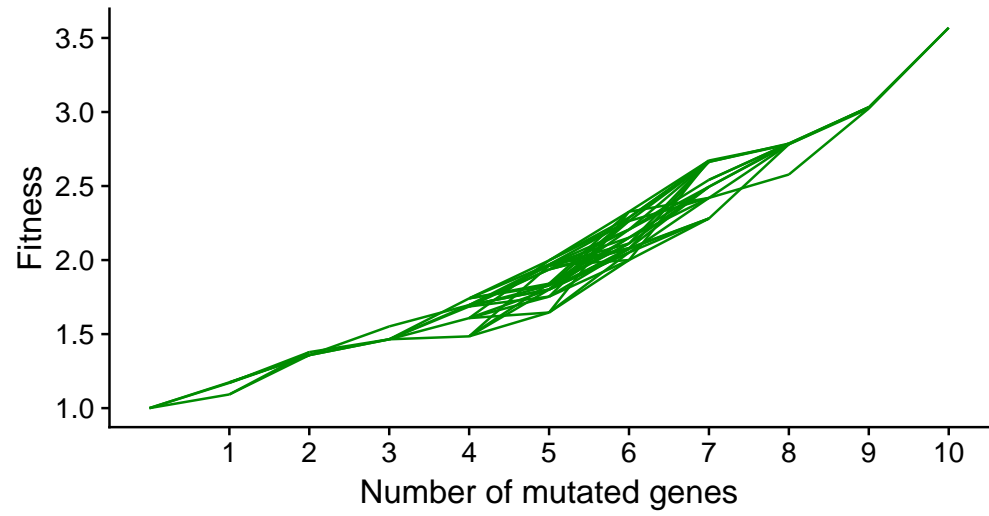

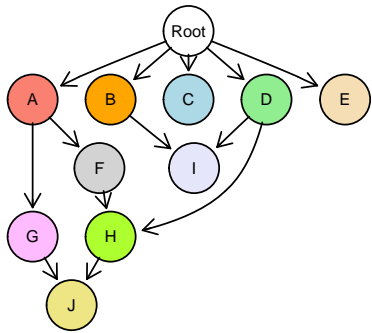

ID **HXibbT4wtp8elqYm**  
 acc genotypes **136**  
 peaks no back 1  
 removed edges 0  
 prop rem edges 0

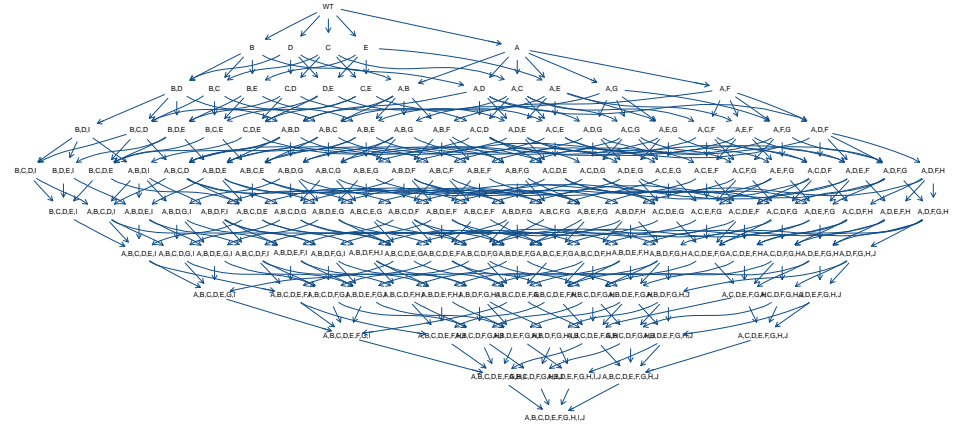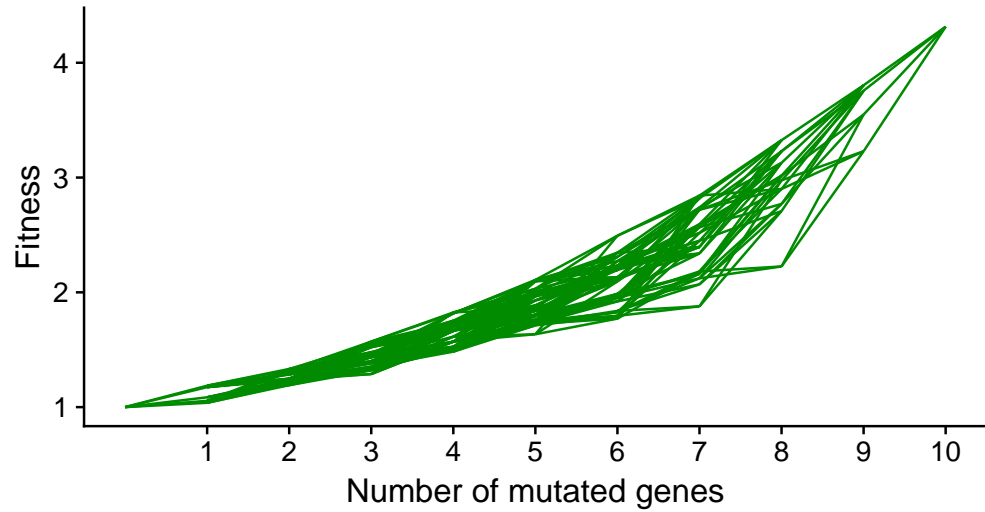

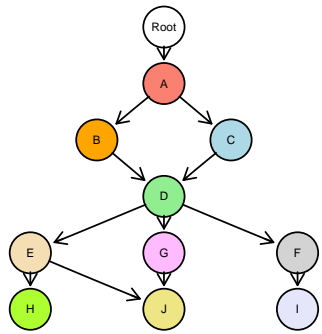

ID **IBfkuKvC5LnGkLI**  
 acc genotypes **29**  
 peaks no back 1  
 removed edges 0  
 prop rem edges 0

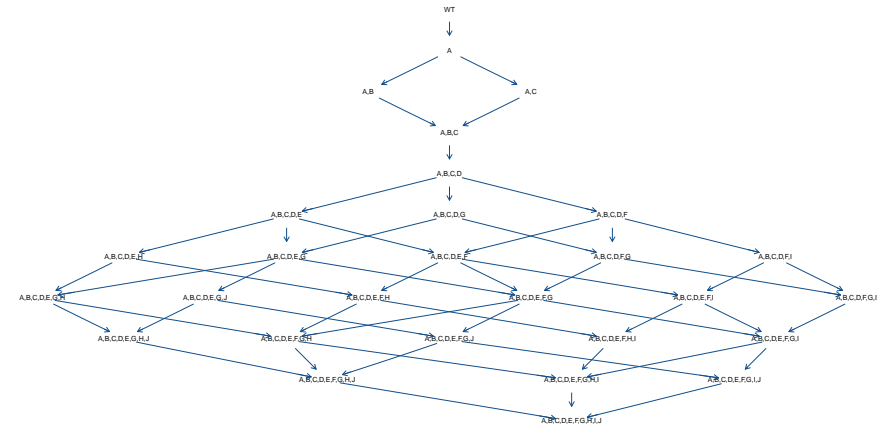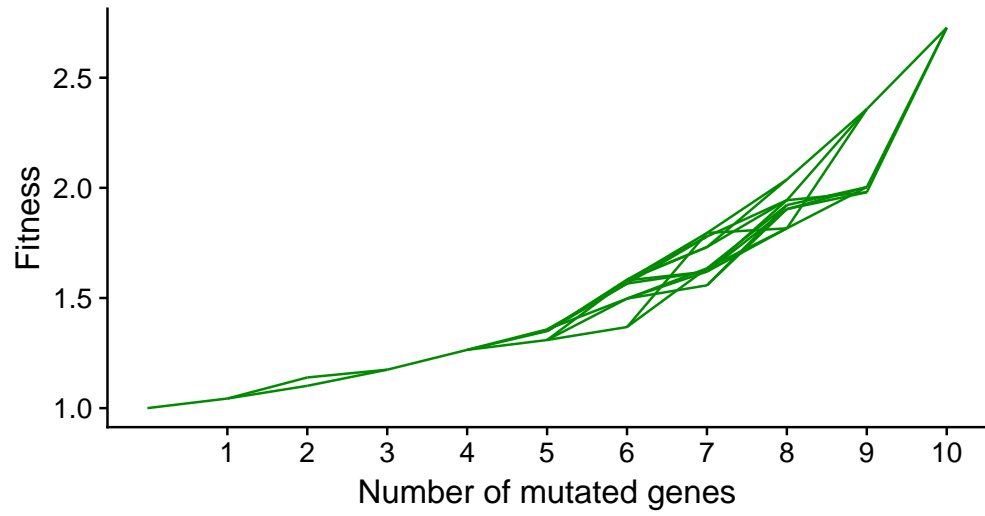



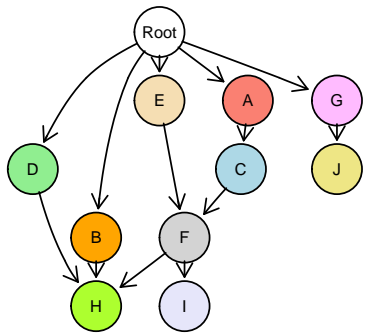

ID **ibqlgMnpLmhx8hJy**  
 acc genotypes **102**  
 peaks no back 1  
 removed edges 0  
 prop rem edges 0

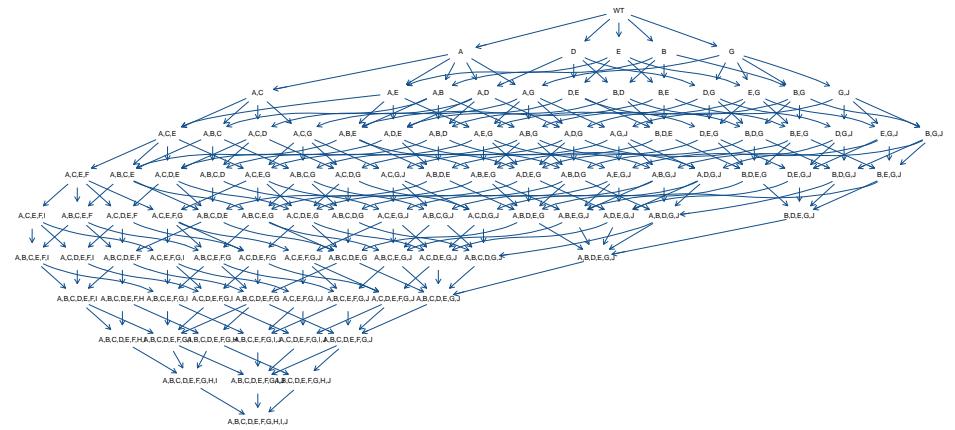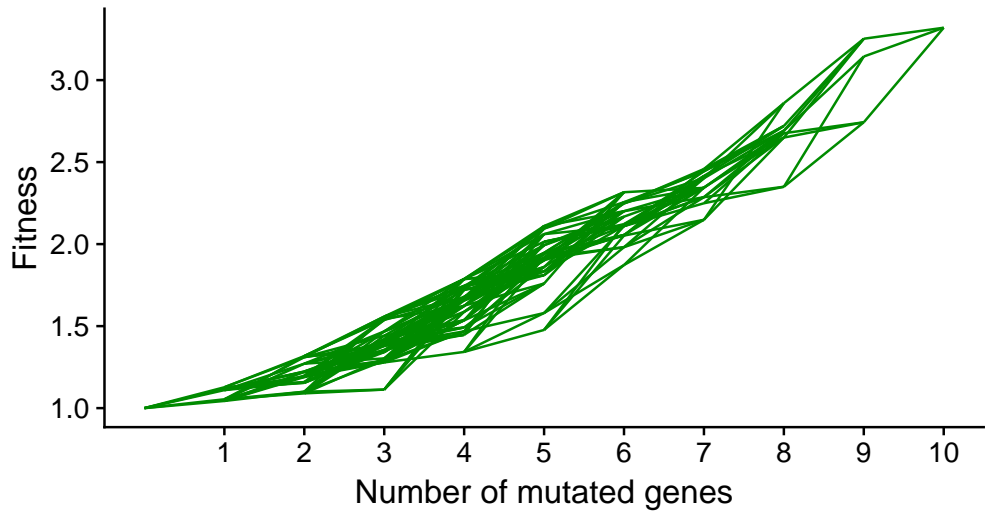

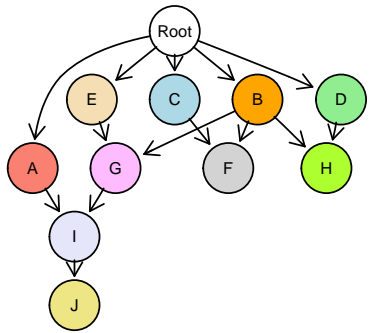

ID IFzpx6g9rMSHRpvL  
 acc genotypes 88  
 peaks no back 1  
 removed edges 0  
 prop rem edges 0

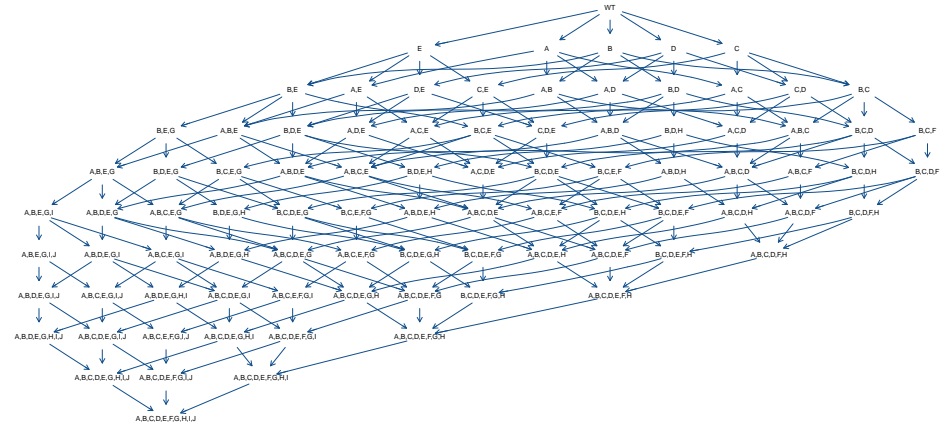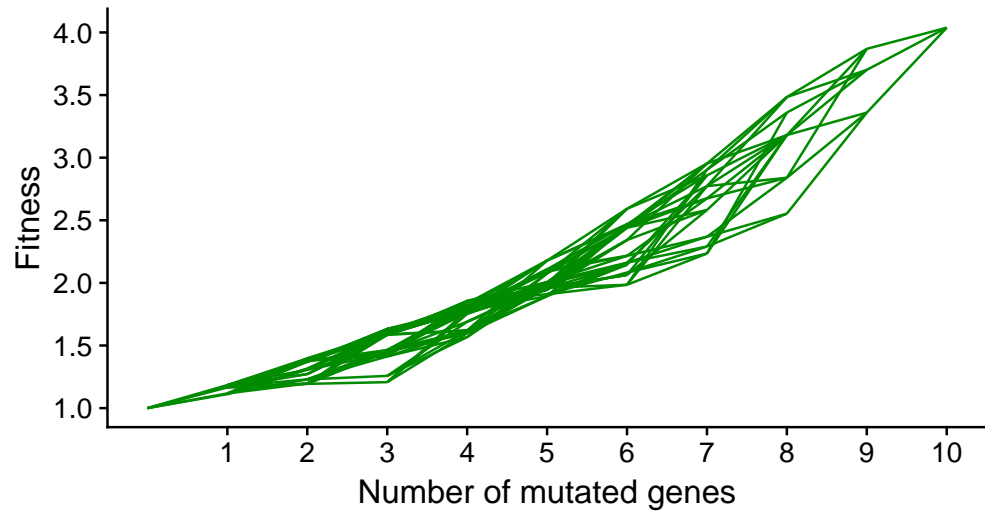

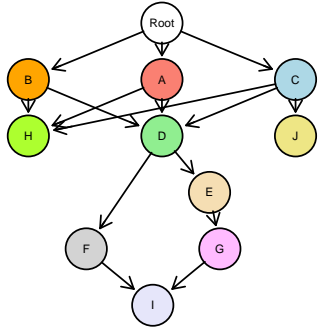

ID **IGNIamDyyl6pJkAH**  
 acc genotypes **42**  
 peaks no back 1  
 removed edges 0  
 prop rem edges 0

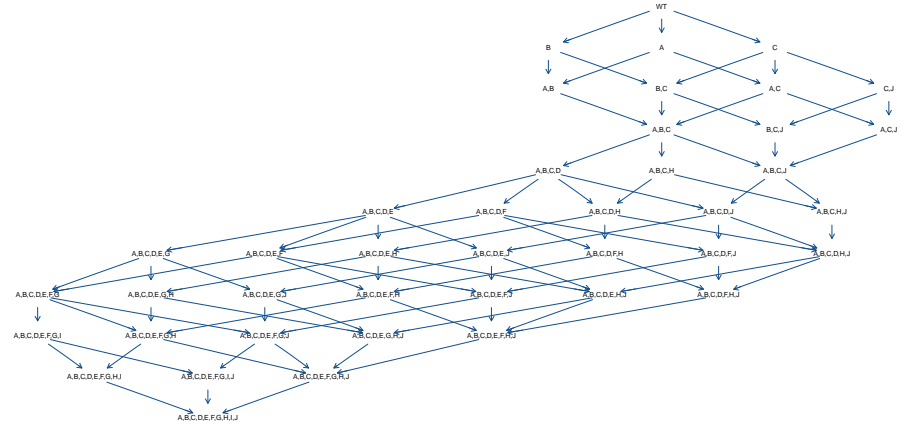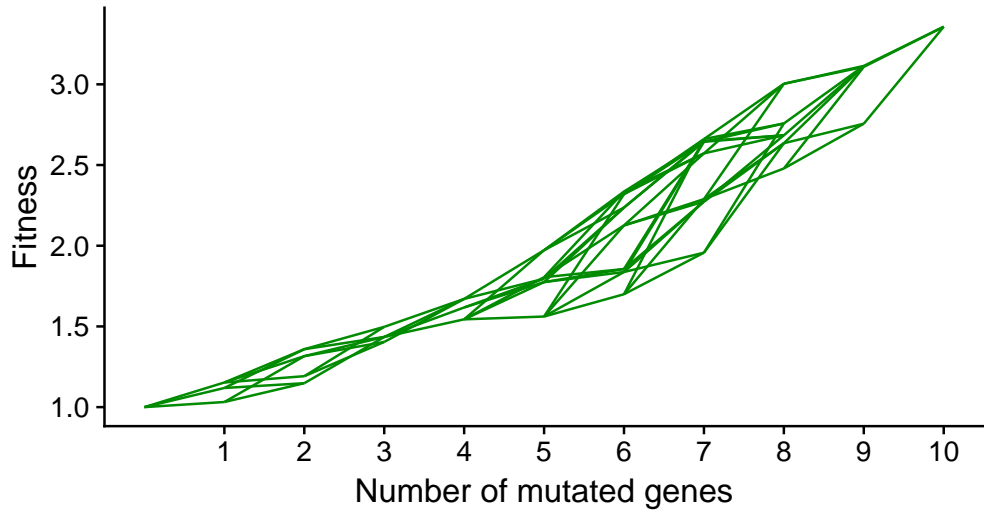

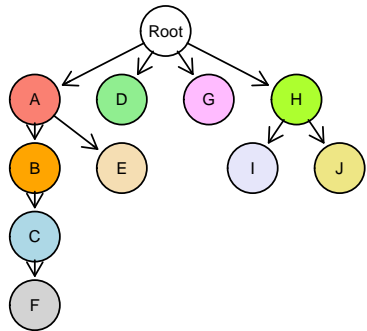

ID IY6ewqbwnTGL76Q  
 acc genotypes 180  
 peaks no back 1  
 removed edges 0  
 prop rem edges 0

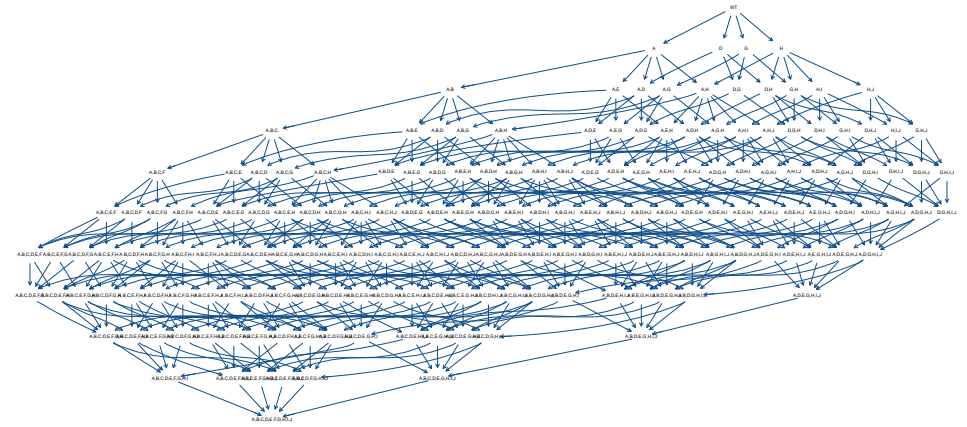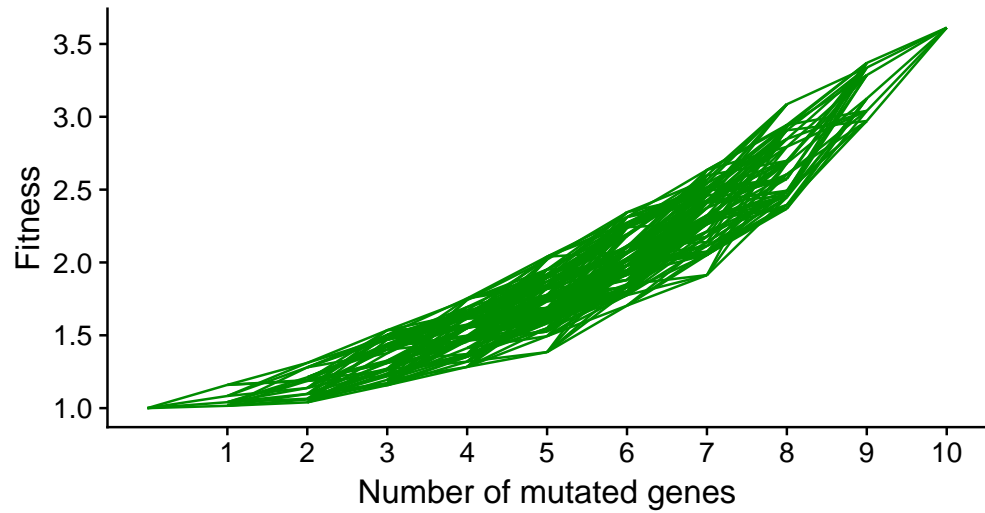

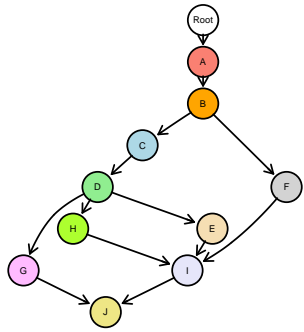

ID IJ82SrhcD1ULypf8  
 acc genotypes 25  
 peaks no back 1  
 removed edges 0  
 prop rem edges 0

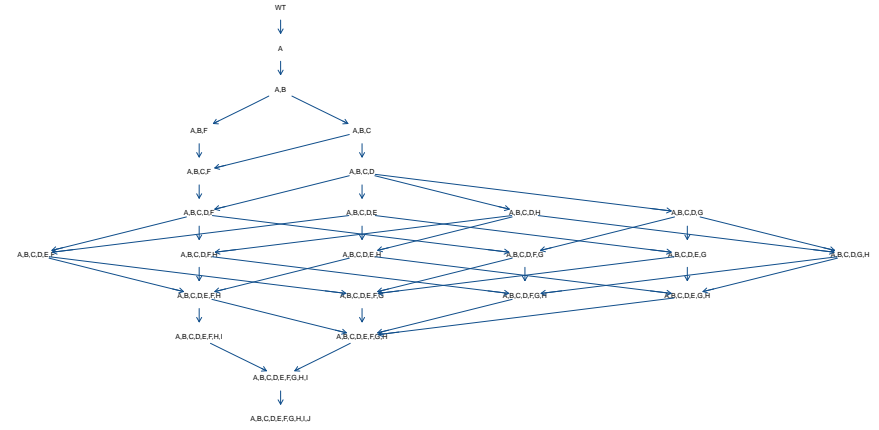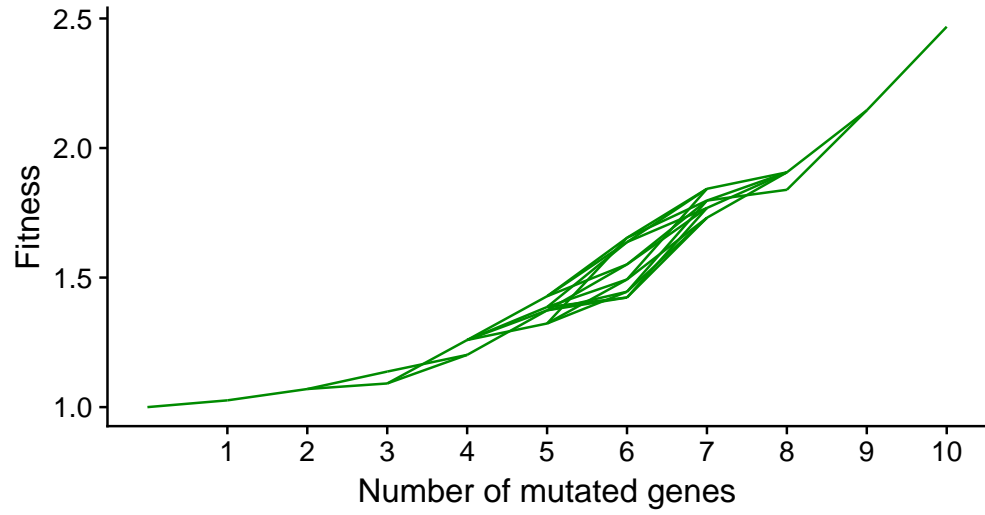

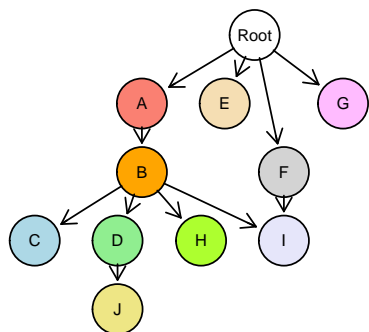

ID **lqqz4siy10VLgJ5s**  
 acc genotypes **160**  
 peaks no back 1  
 removed edges 0  
 prop rem edges 0

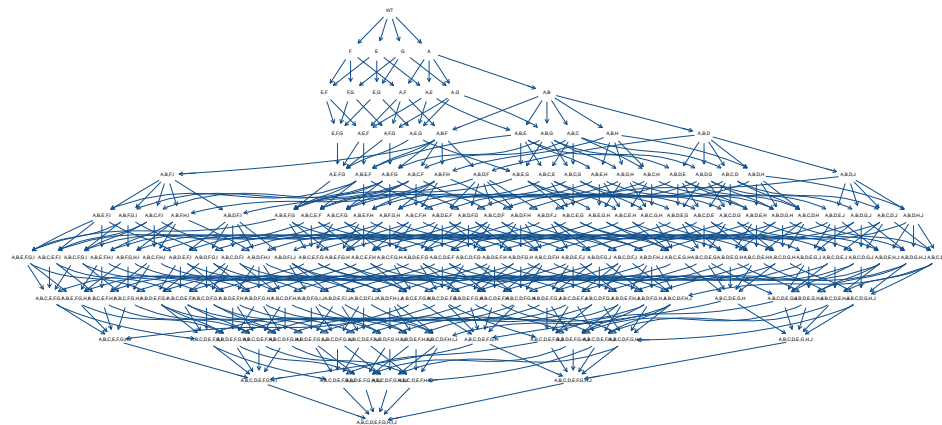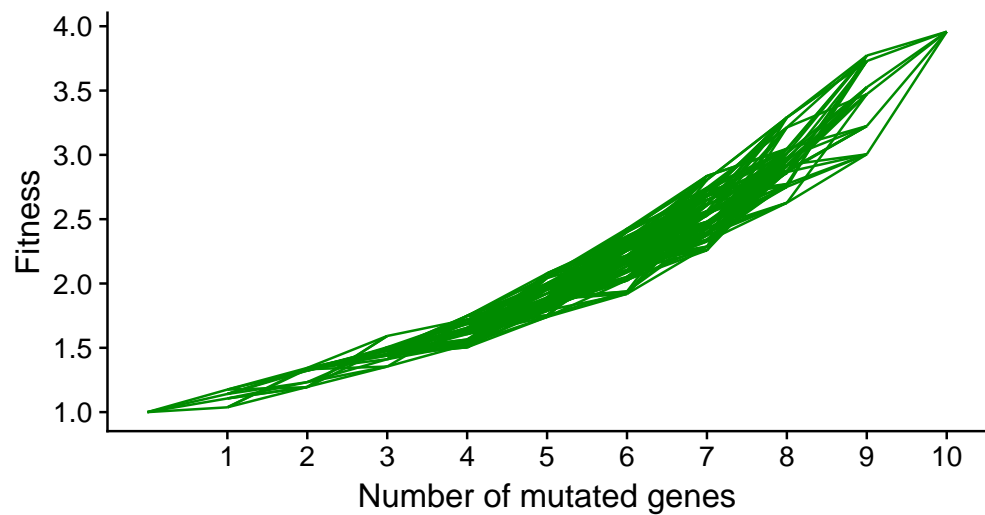

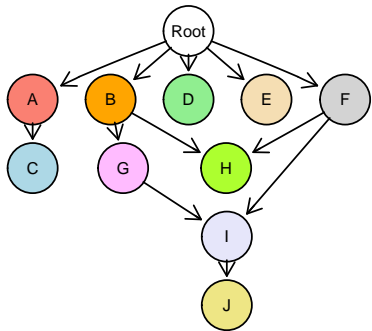

ID ITJu10YfirKiTyZLt  
 acc genotypes 144  
 peaks no back 1  
 removed edges 0  
 prop rem edges 0

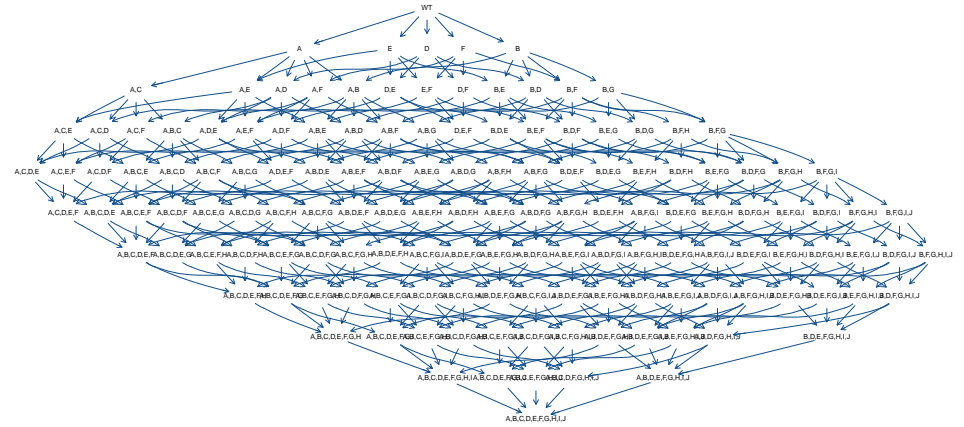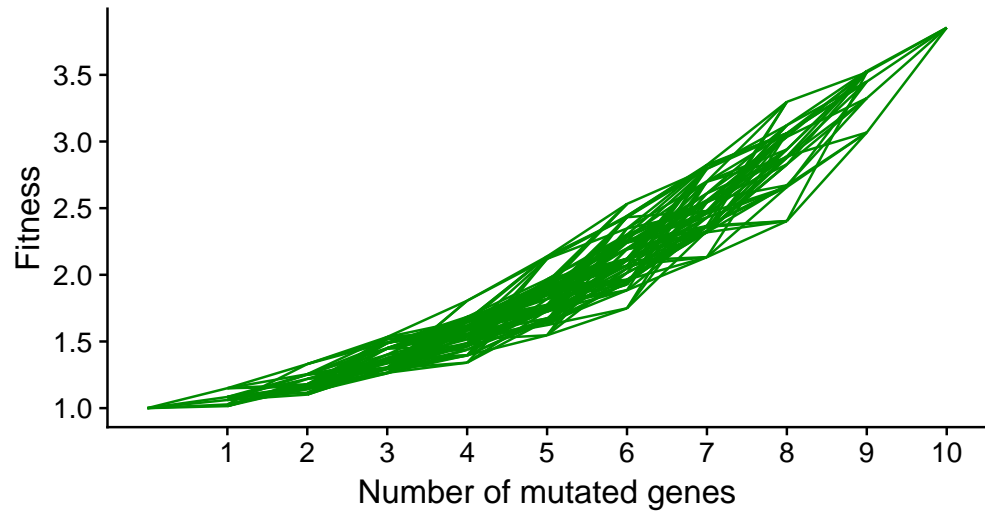

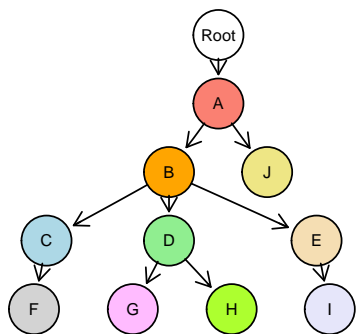

ID **j5cMndnUwm51TTqp**  
 acc genotypes **93**  
 peaks no back 1  
 removed edges 0  
 prop rem edges 0

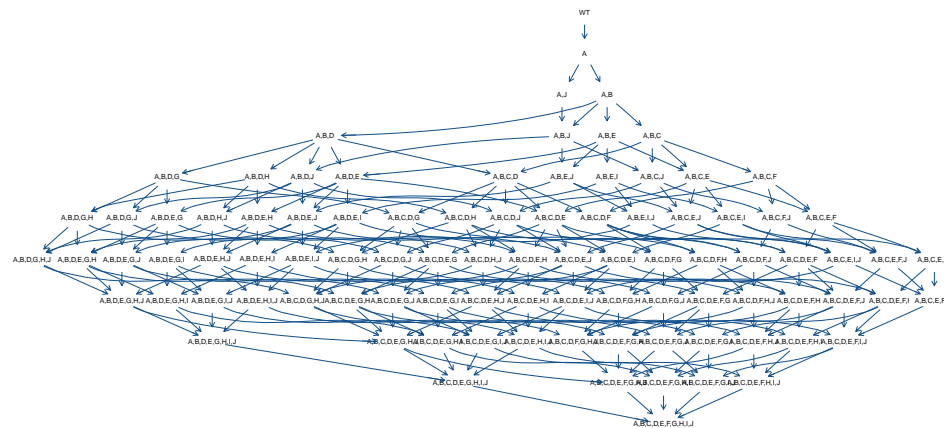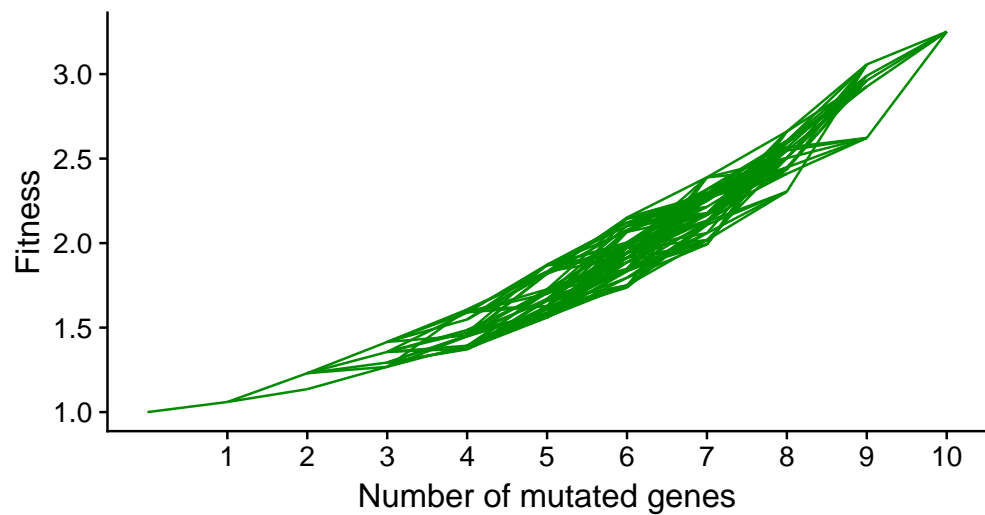



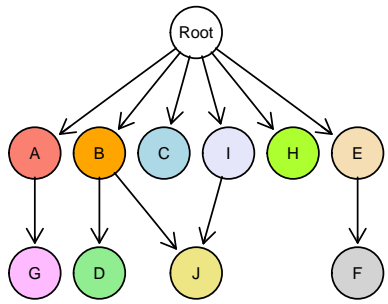

ID **j6HW2RoAhJ2N68DN**  
 acc genotypes **288**  
 peaks no back 1  
 removed edges 0  
 prop rem edges 0

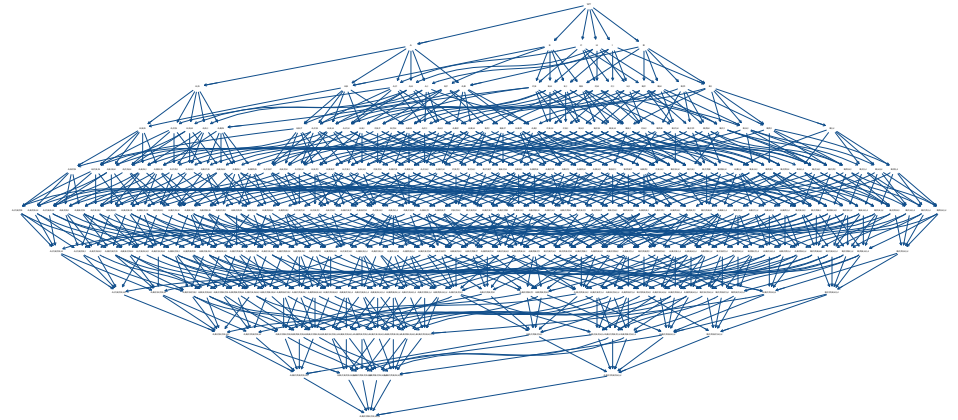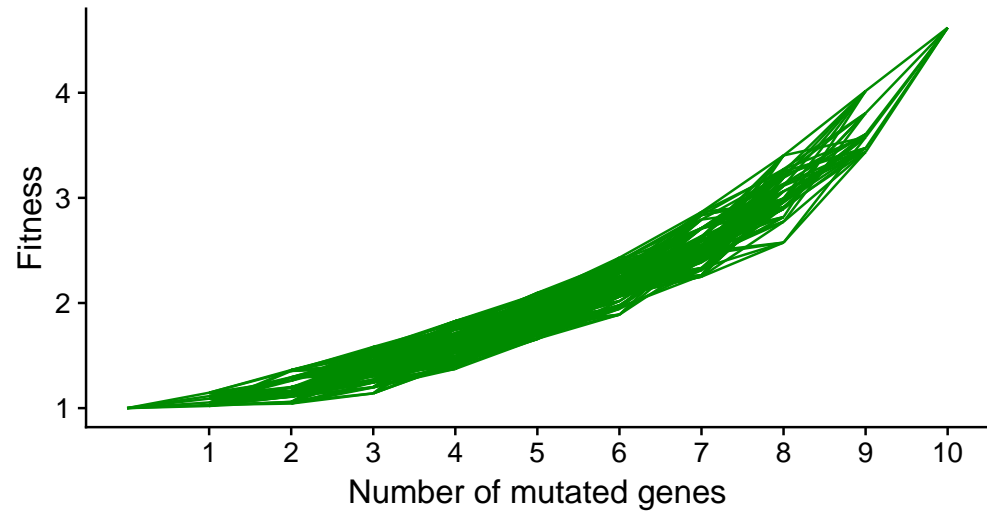

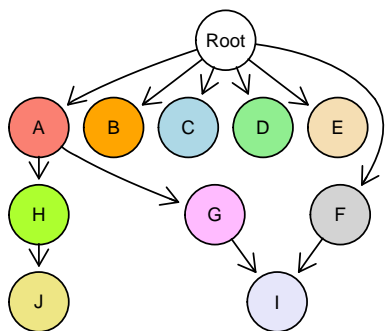

ID **jAZ9fNKs3jEXePB4**  
 acc genotypes **272**  
 peaks no back 1  
 removed edges 0  
 prop rem edges 0

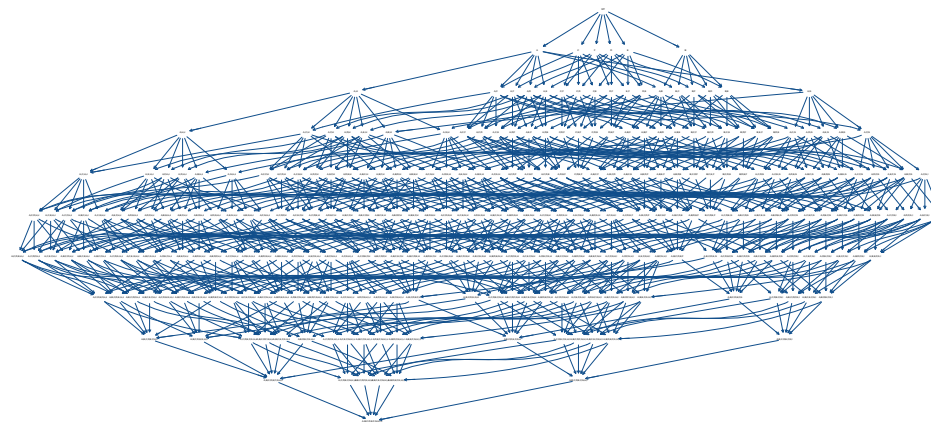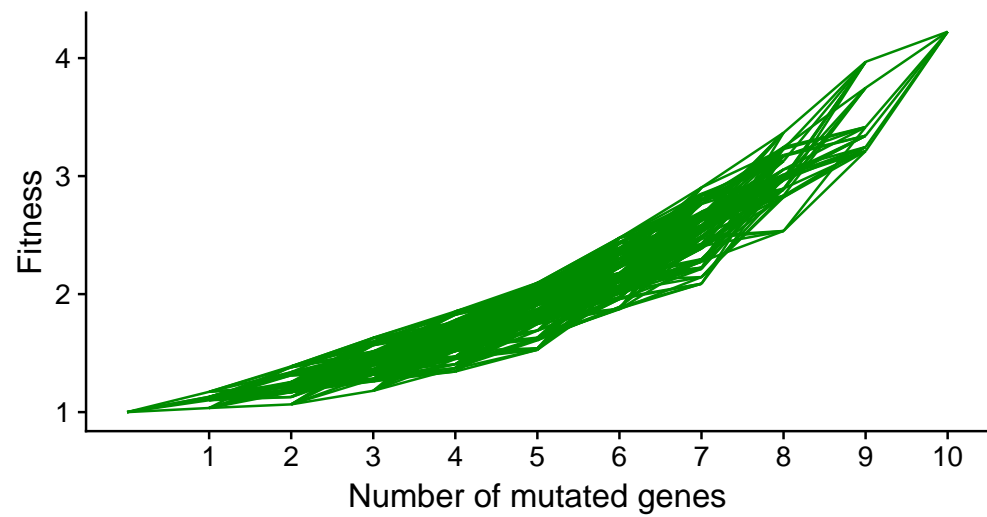

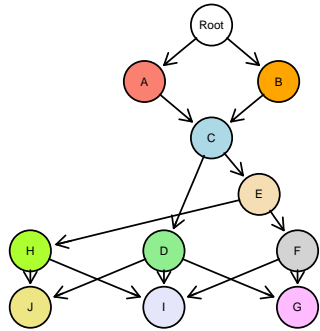

ID **jD4PcR3DEFwIK6qC**  
 acc genotypes **23**  
 peaks no back 1  
 removed edges 0  
 prop rem edges 0

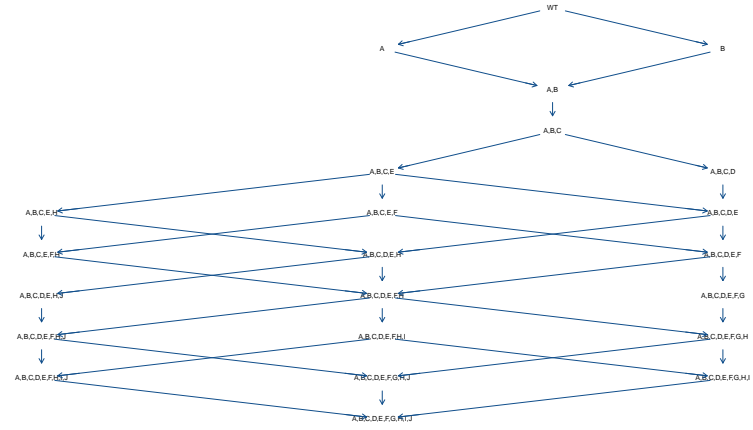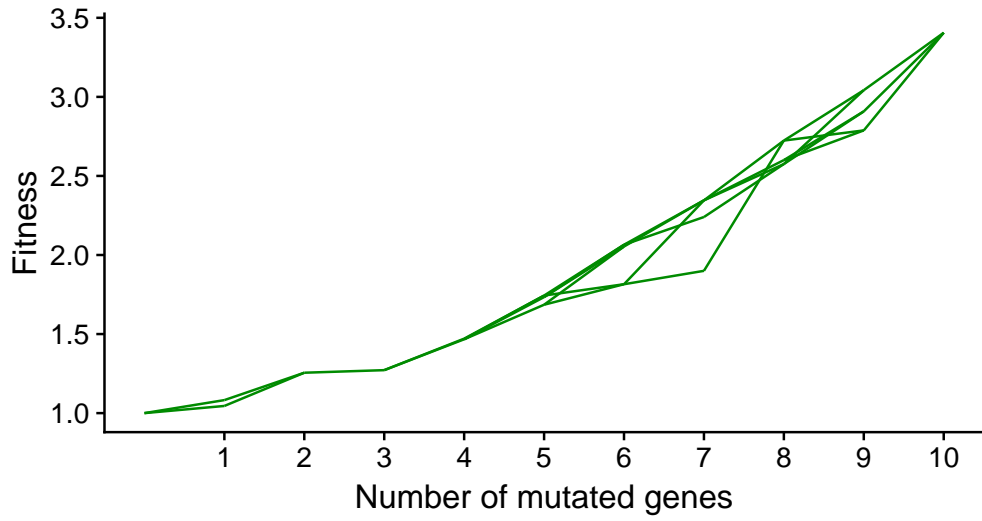

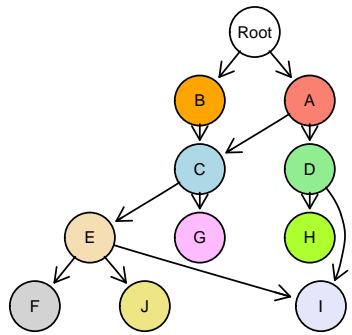

ID Jh8glYdX10audNWJF  
 acc genotypes 54  
 peaks no back 1  
 removed edges 0  
 prop rem edges 0

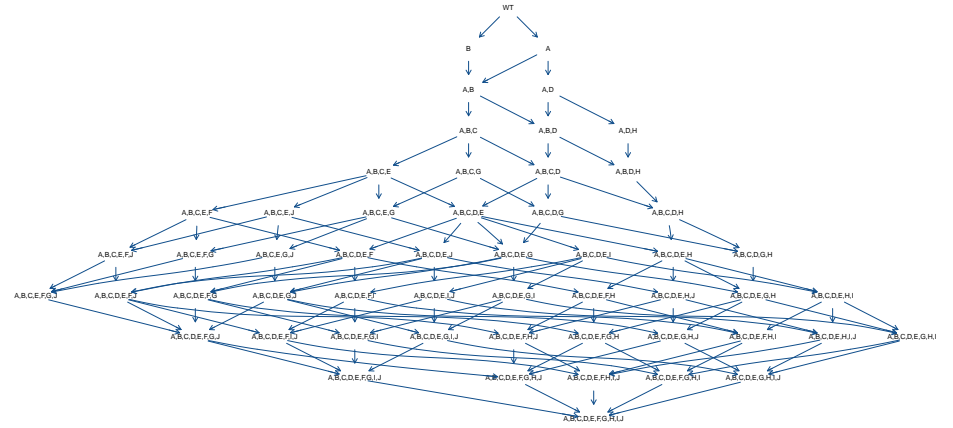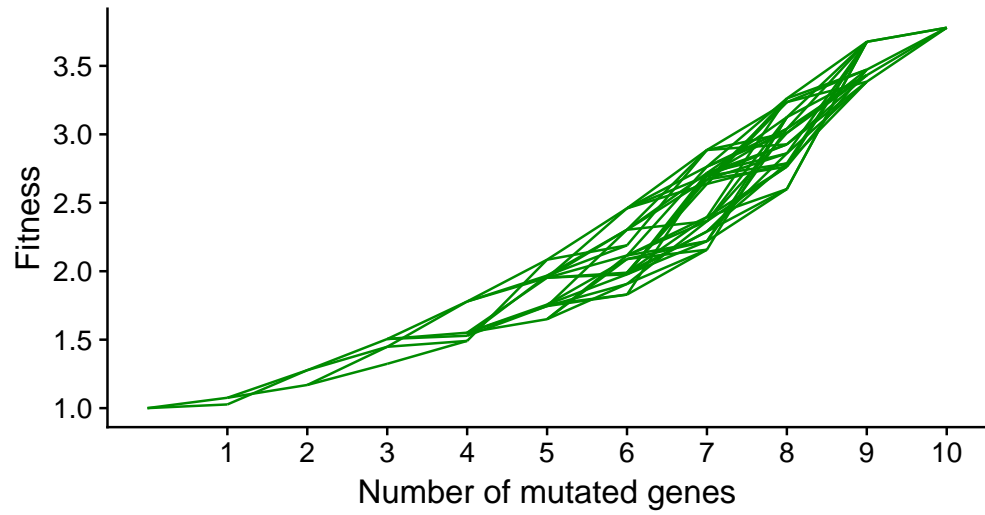

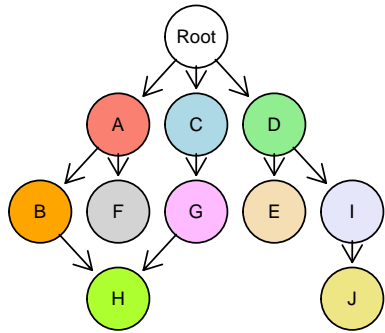

ID JhPPnqKAJCL8pvR  
 acc genotypes 119  
 peaks no back 1  
 removed edges 0  
 prop rem edges 0

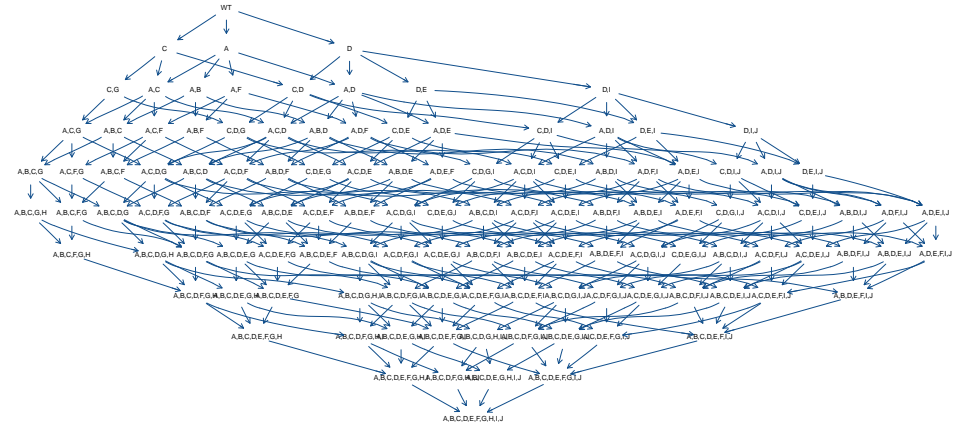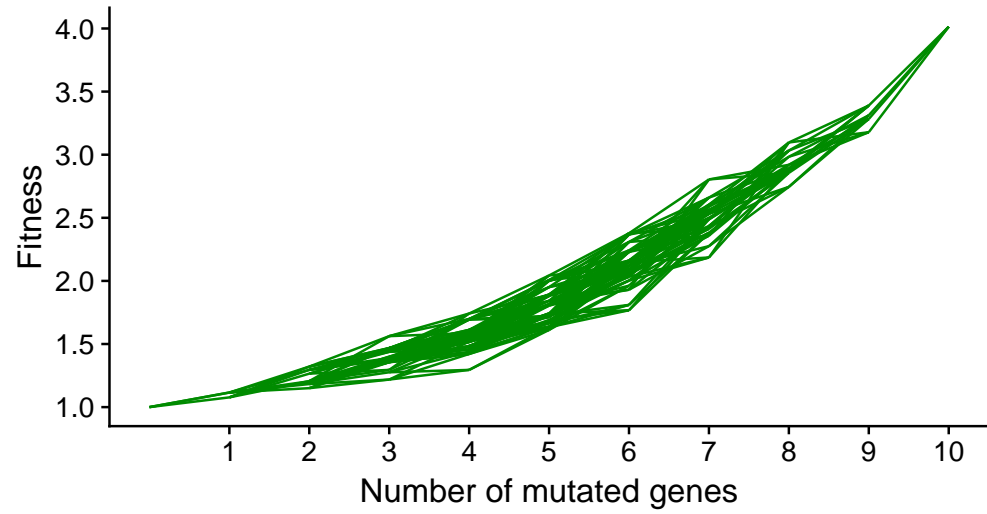

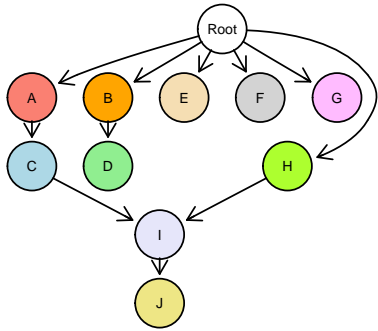

ID **JIKf7ckdhSo6ArQQ**  
 acc genotypes **192**  
 peaks no back 1  
 removed edges 0  
 prop rem edges 0

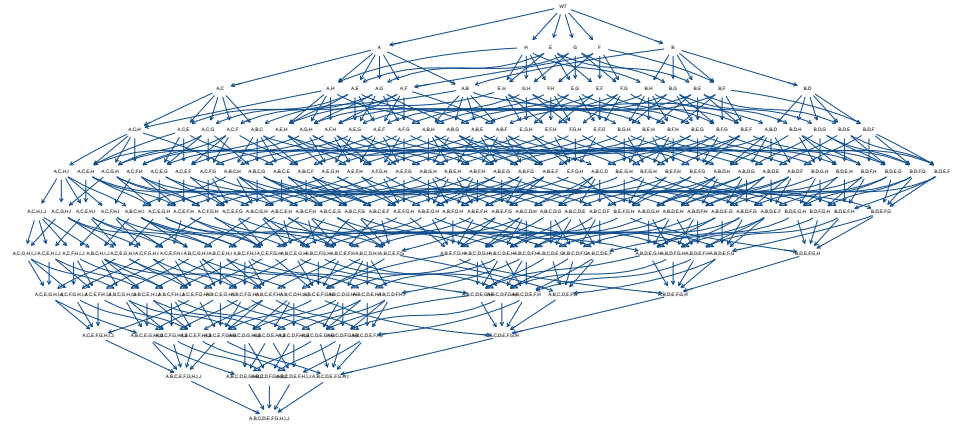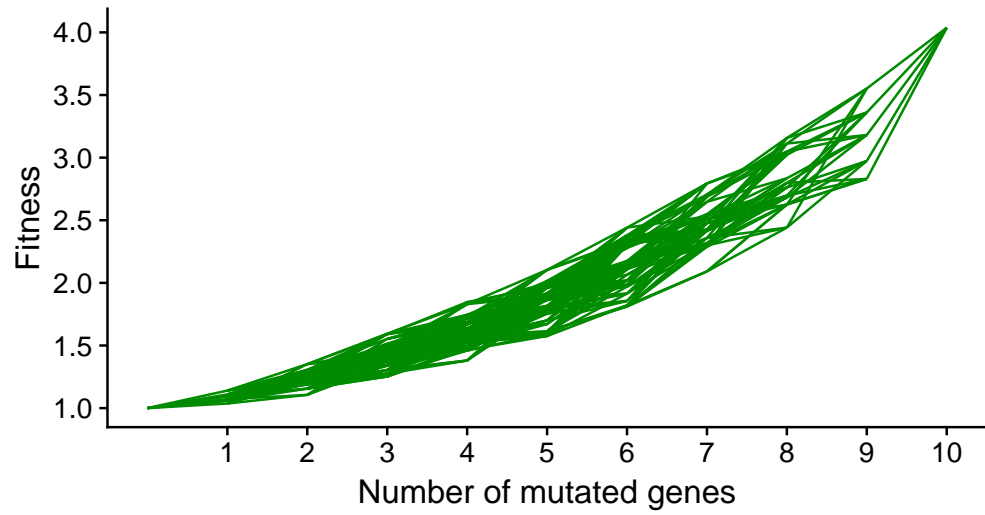

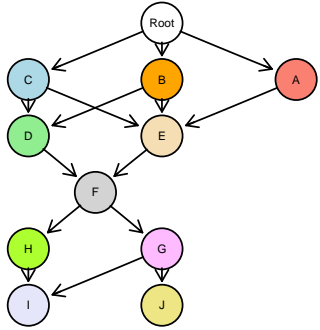

ID **JoiUrrmmVqj67SyTm**  
 acc genotypes **20**  
 peaks no back 1  
 removed edges 0  
 prop rem edges 0

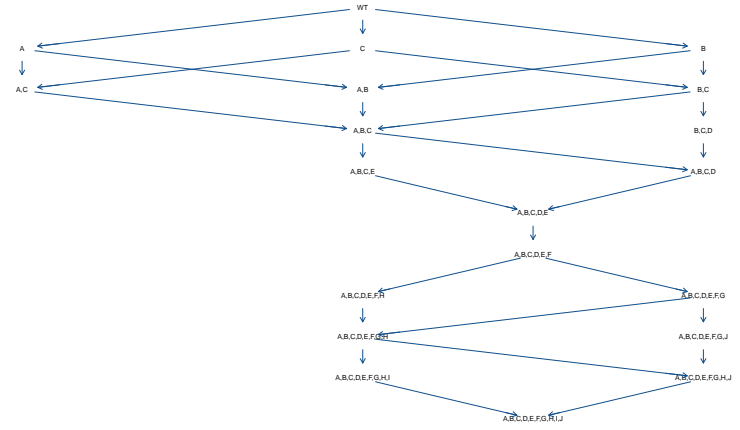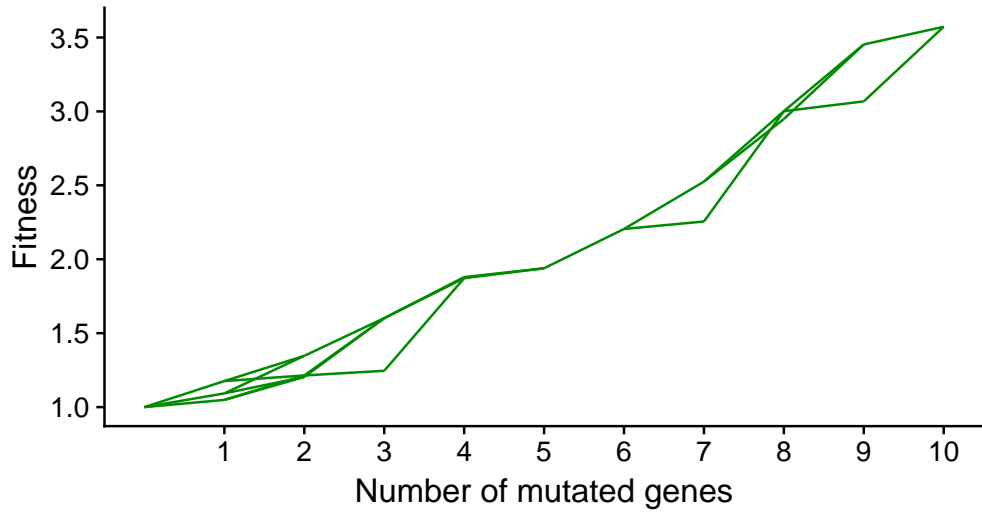

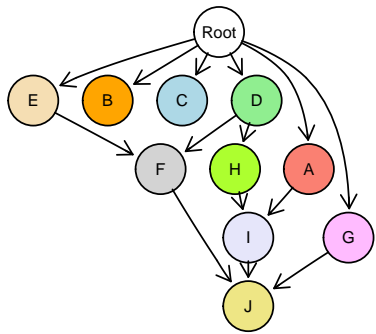

ID **jSQmuyLWDxqE106yj**  
 acc genotypes **156**  
 peaks no back 1  
 removed edges 0  
 prop rem edges 0

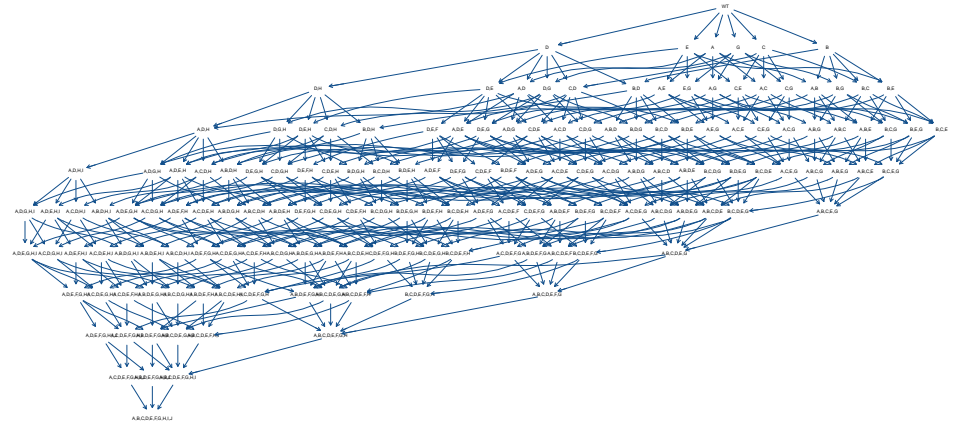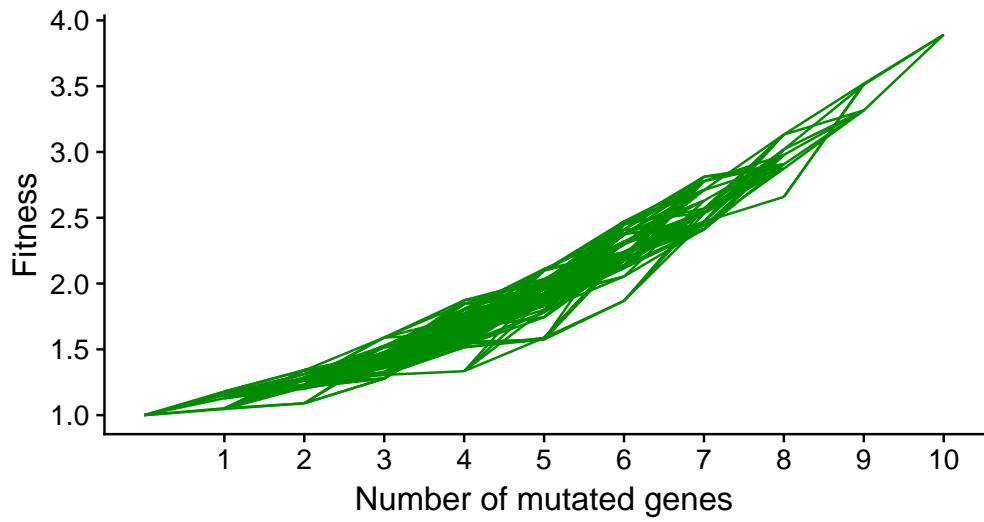



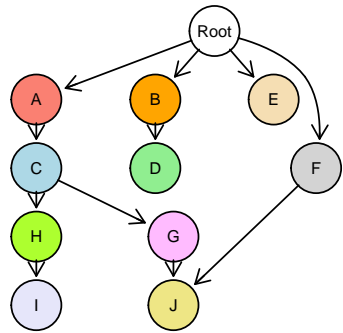

ID **jxDzA3wcvwQmXJvD**  
 acc genotypes **114**  
 peaks no back 1  
 removed edges 0  
 prop rem edges 0

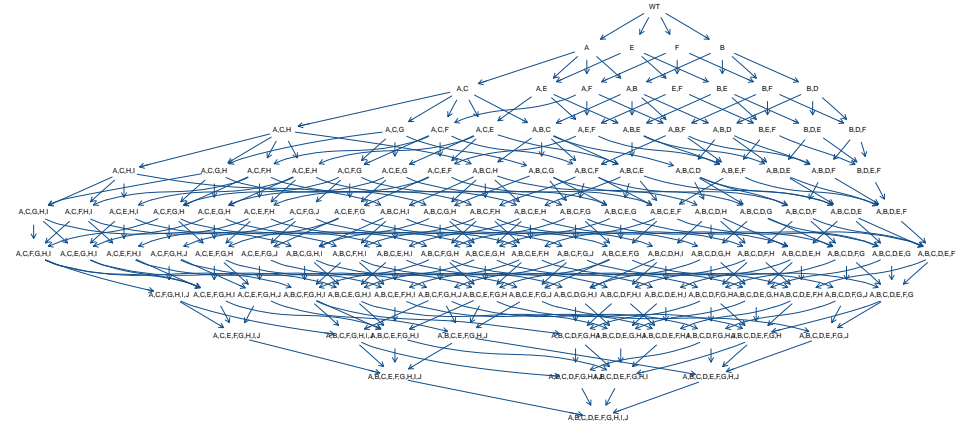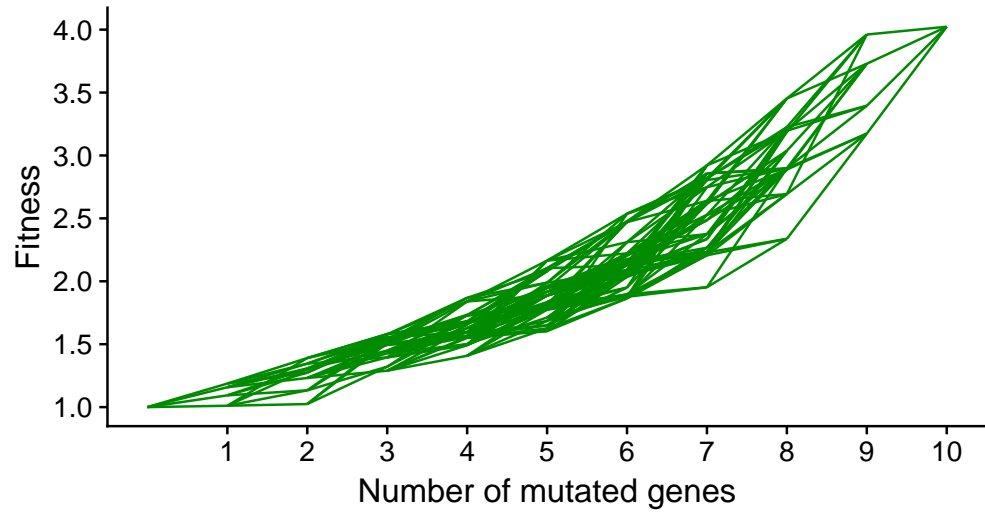

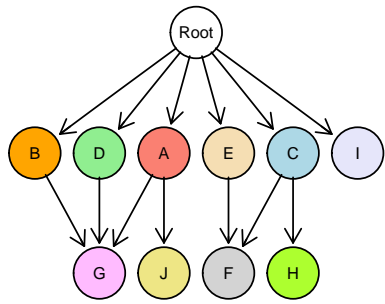

ID **K1jCHK7t4zCUPD6B**  
 acc genotypes **224**  
 peaks no back 1  
 removed edges 0  
 prop rem edges 0

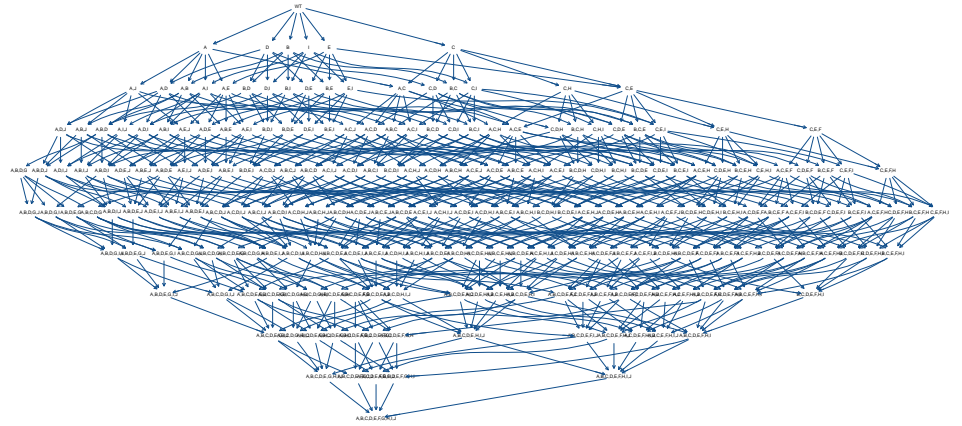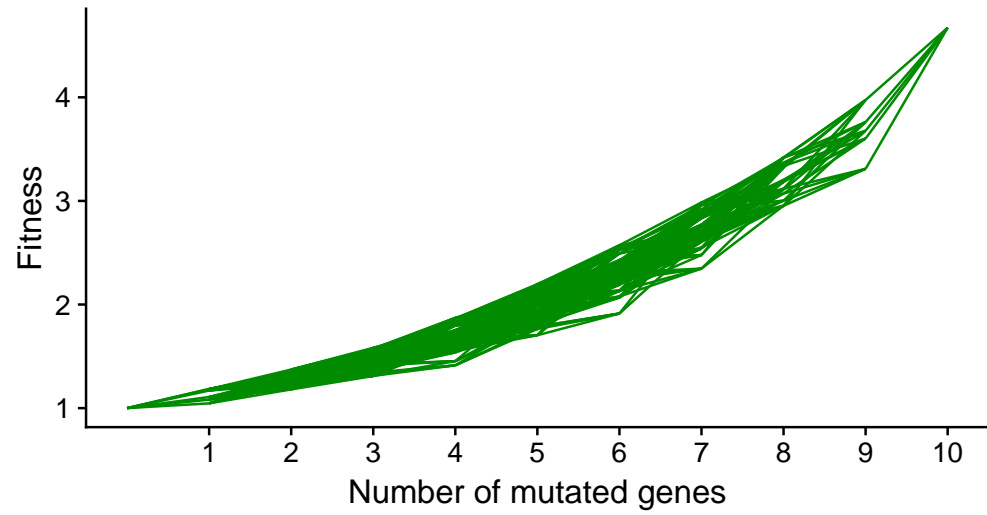

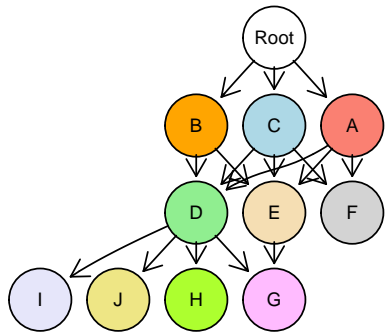

ID **KkQL102YepOiao9Bb**  
 acc genotypes **60**  
 peaks no back 1  
 removed edges 0  
 prop rem edges 0

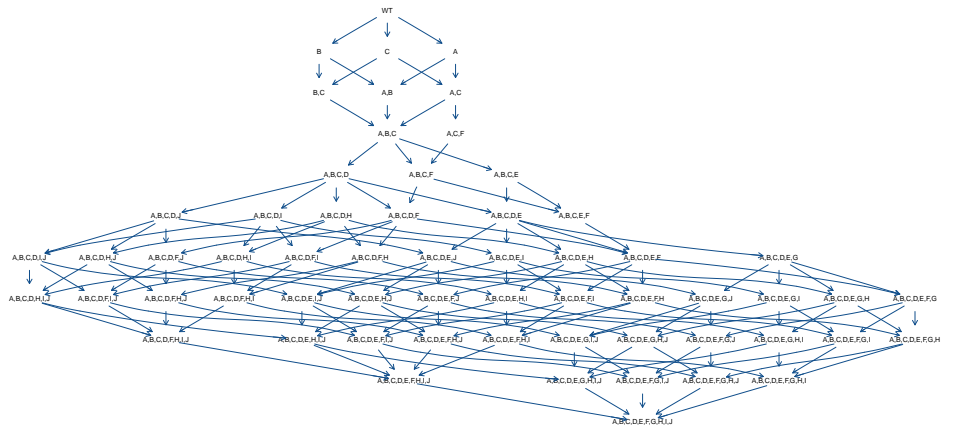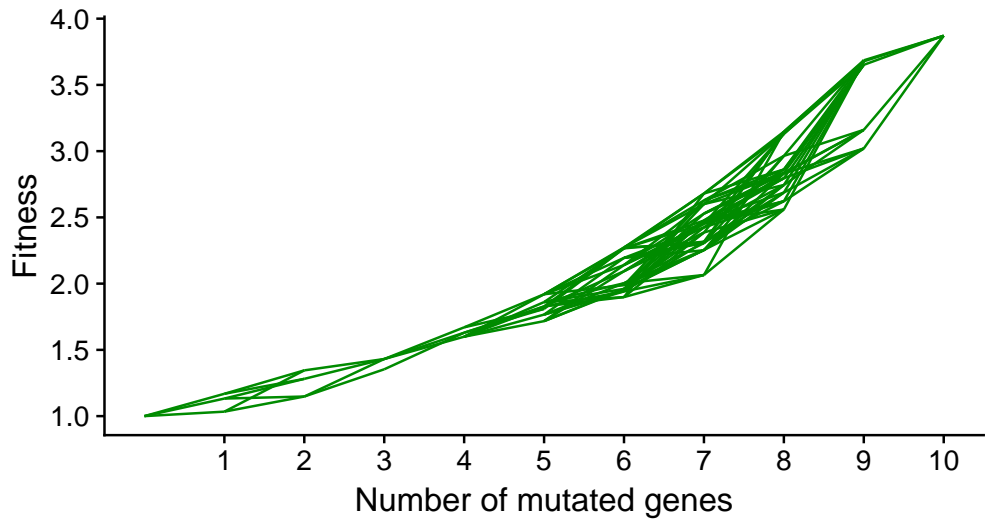

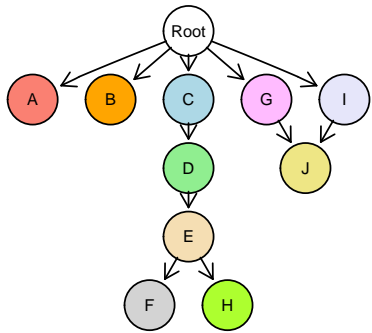

ID **kpRFNq2Q10Ex8oSMG**  
 acc genotypes **140**  
 peaks no back 1  
 removed edges 0  
 prop rem edges 0

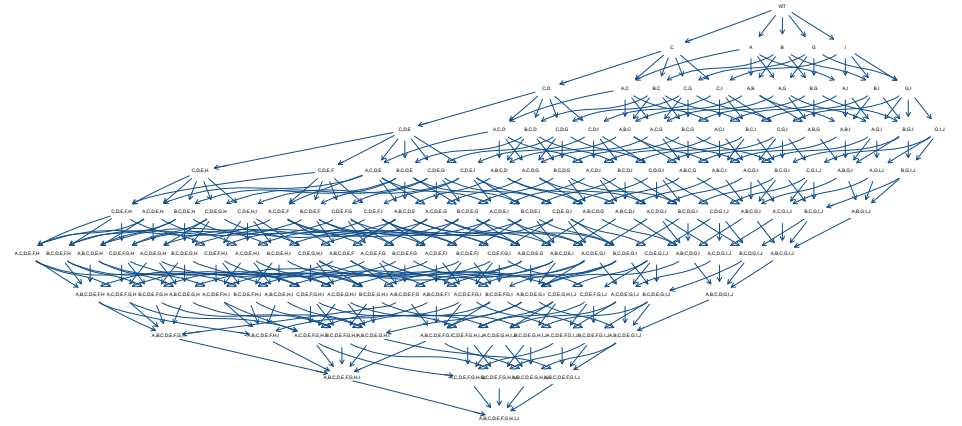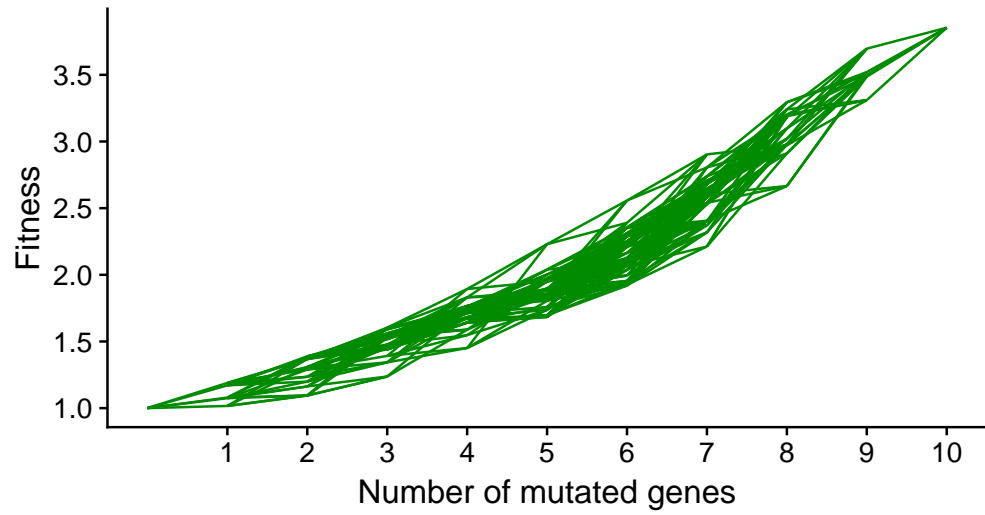

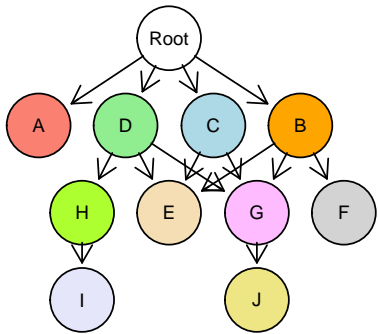

ID **ktOHeXaq4zp10UQNO**  
 acc genotypes **108**  
 peaks no back 1  
 removed edges 0  
 prop rem edges 0

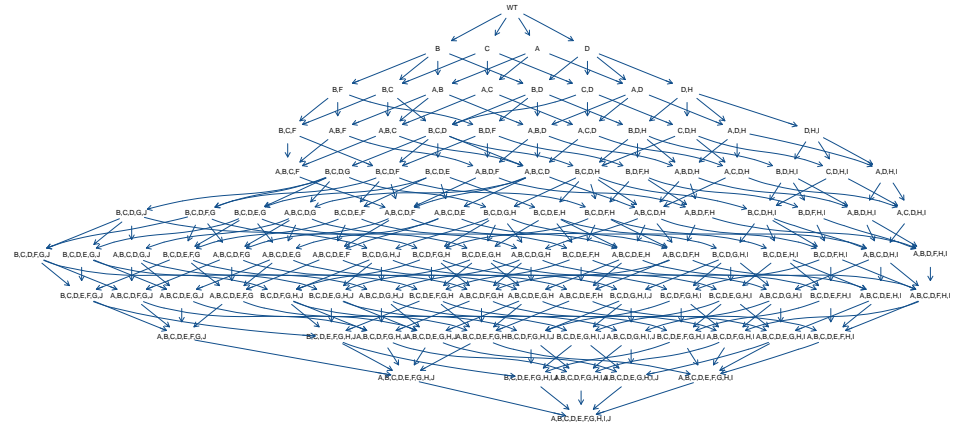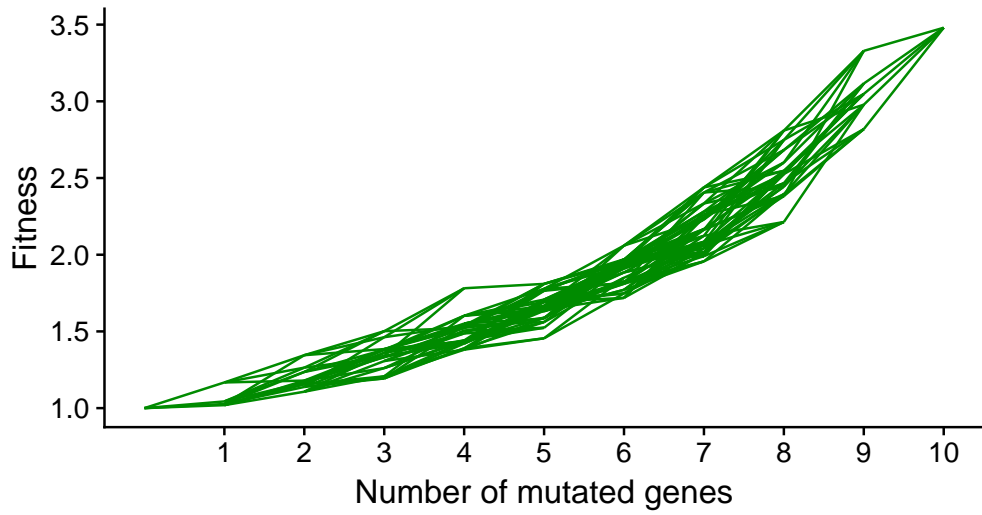

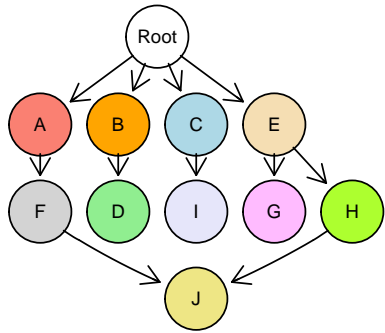

ID kvDLqWZKOAz5w43U  
 acc genotypes 153  
 peaks no back 1  
 removed edges 0  
 prop rem edges 0

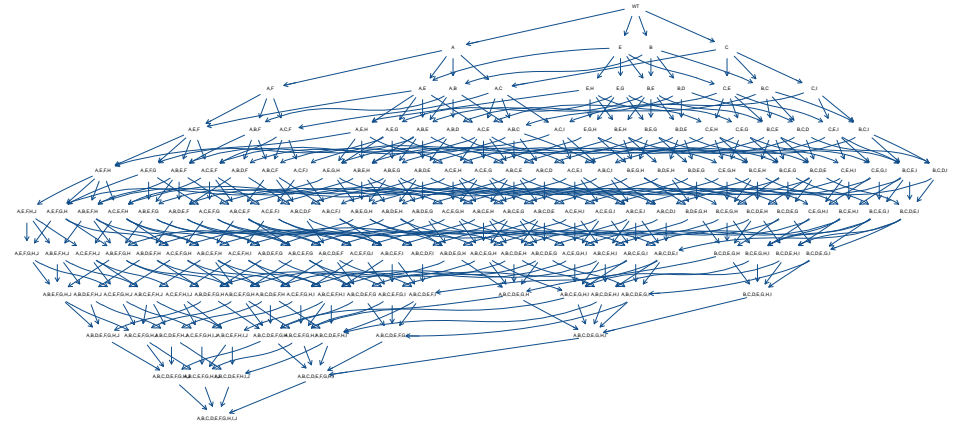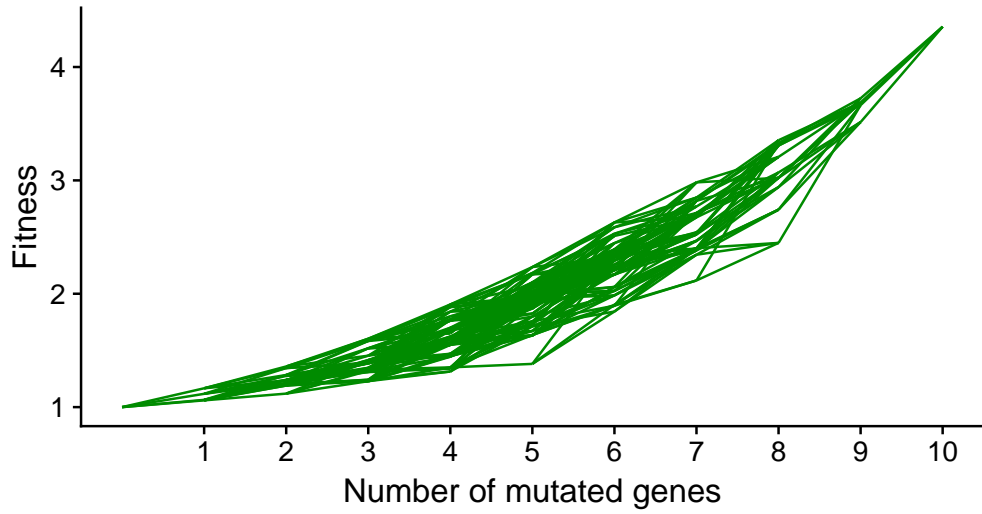

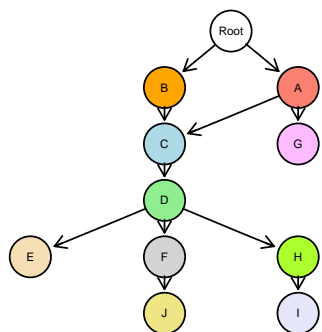

ID [Laiwaf4n74KilOZv](#)  
 acc genotypes 44  
 peaks no back 1  
 removed edges 0  
 prop rem edges 0

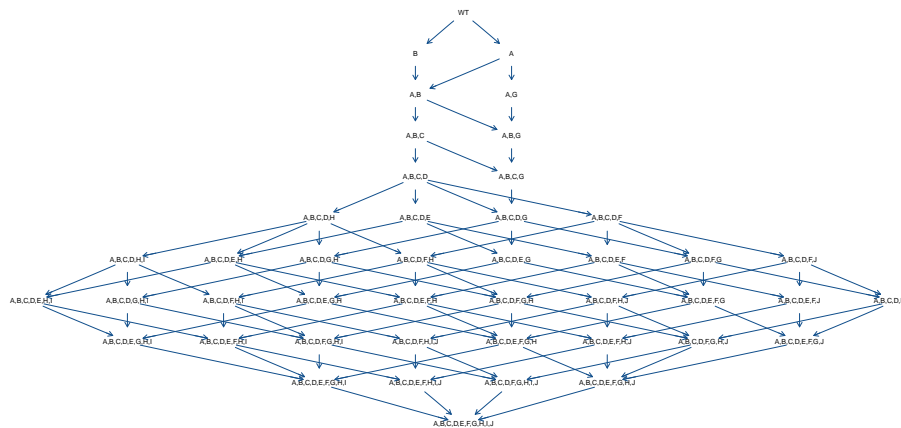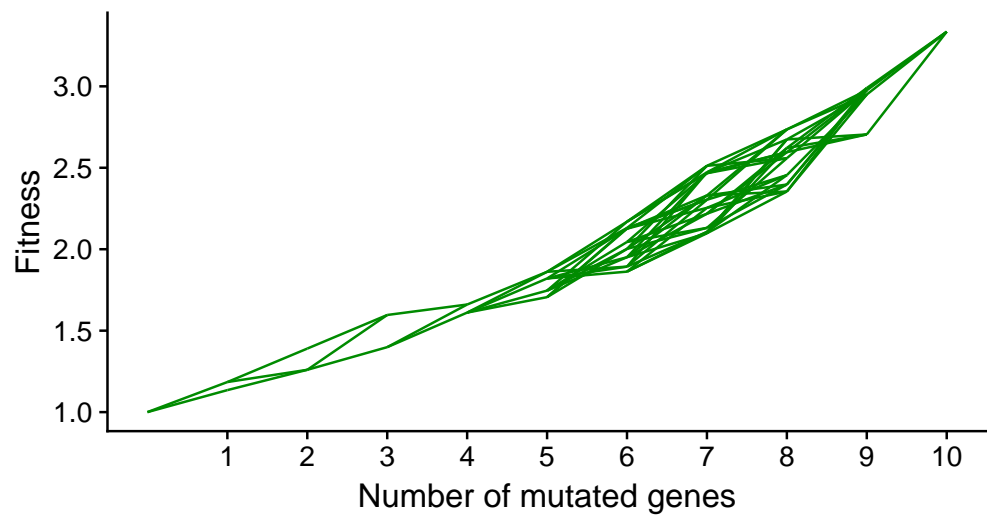

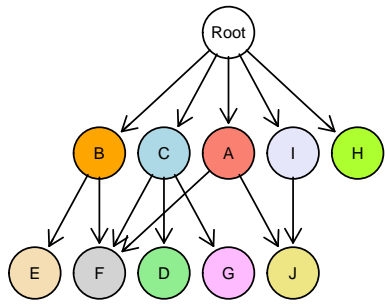

ID LgHU63NzyxJ8cVAR  
 acc genotypes 198  
 peaks no back 1  
 removed edges 0  
 prop rem edges 0

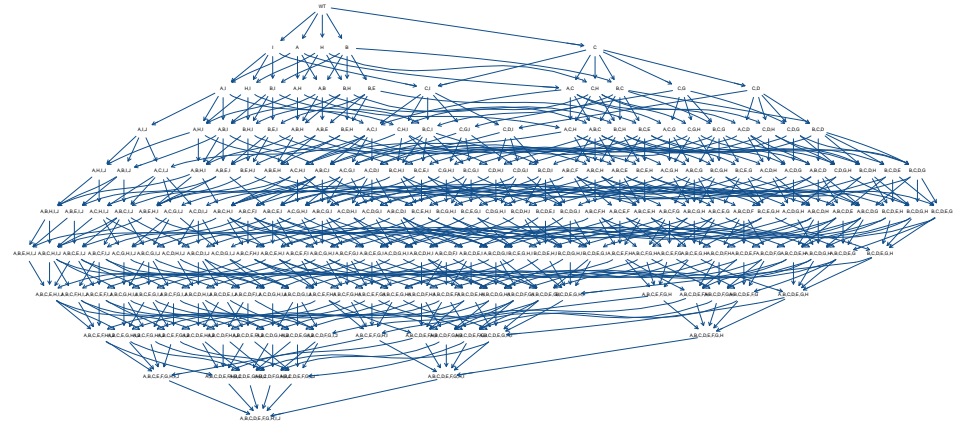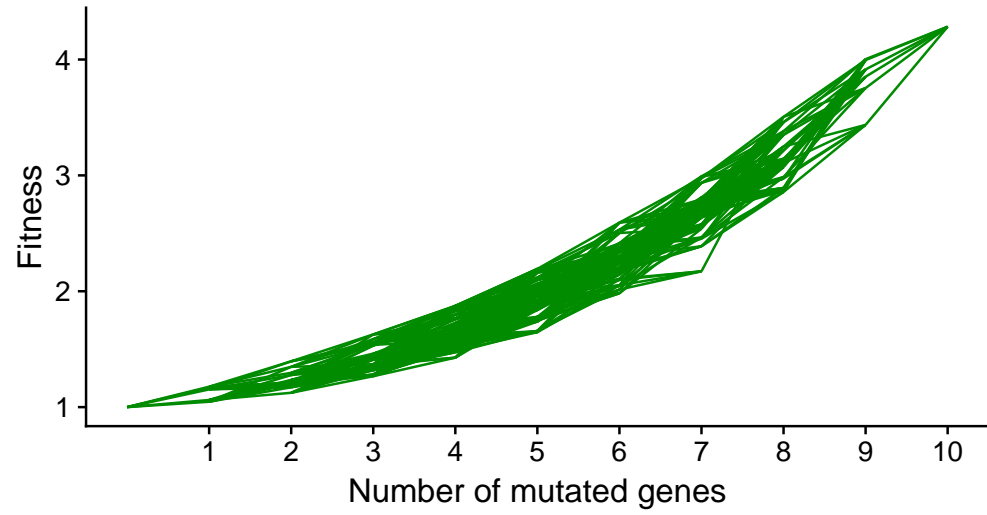



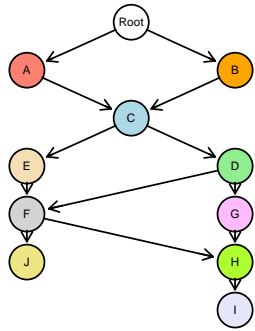

ID IIOath10wN5BQcyee  
 acc genotypes 18  
 peaks no back 1  
 removed edges 0  
 prop rem edges 0

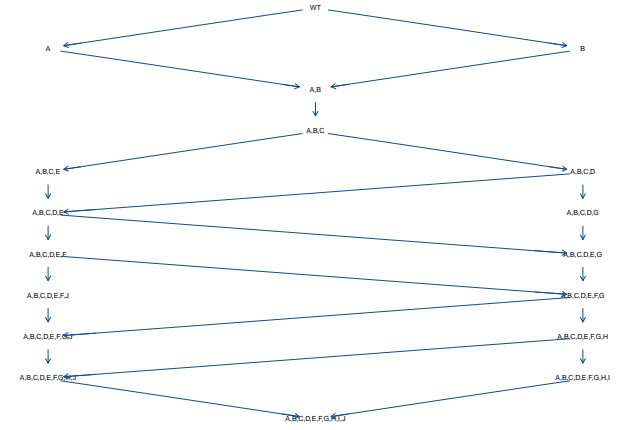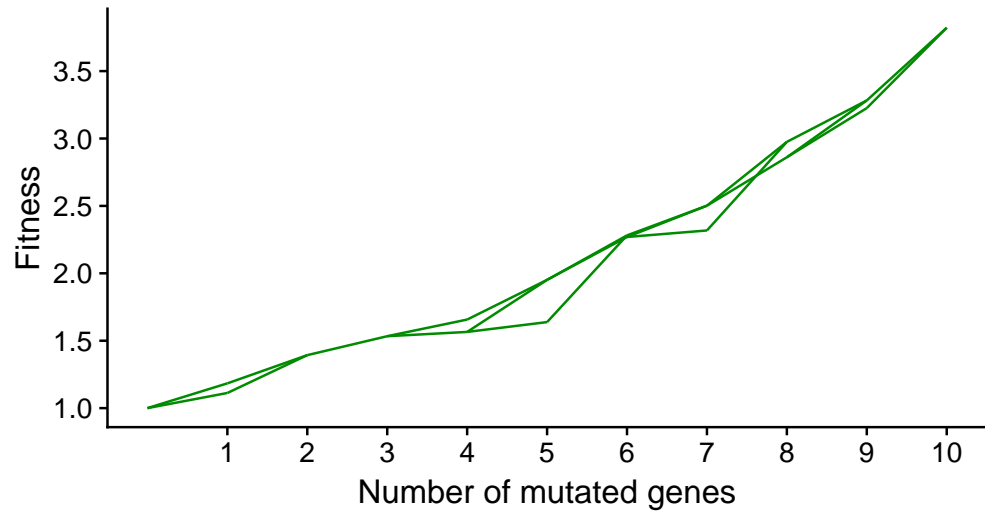

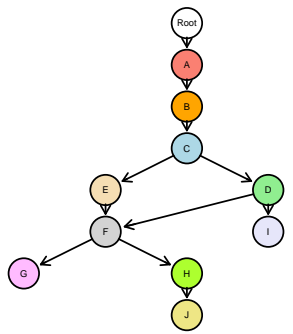

ID **LiqVyEk5185giJ87**  
 acc genotypes **21**  
 peaks no back 1  
 removed edges 0  
 prop rem edges 0

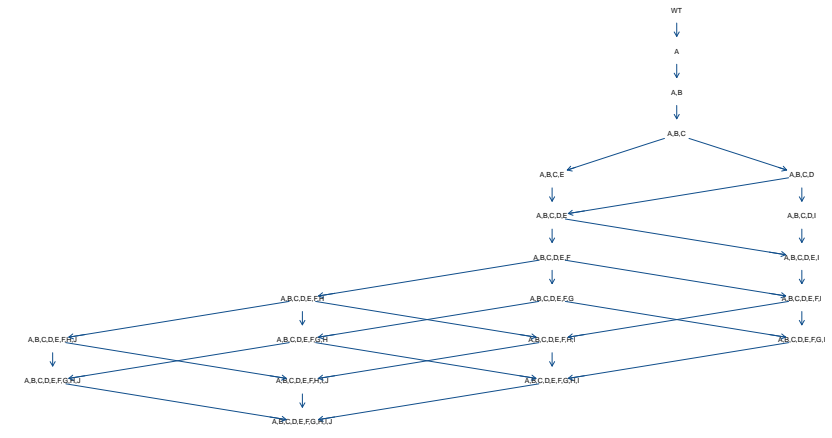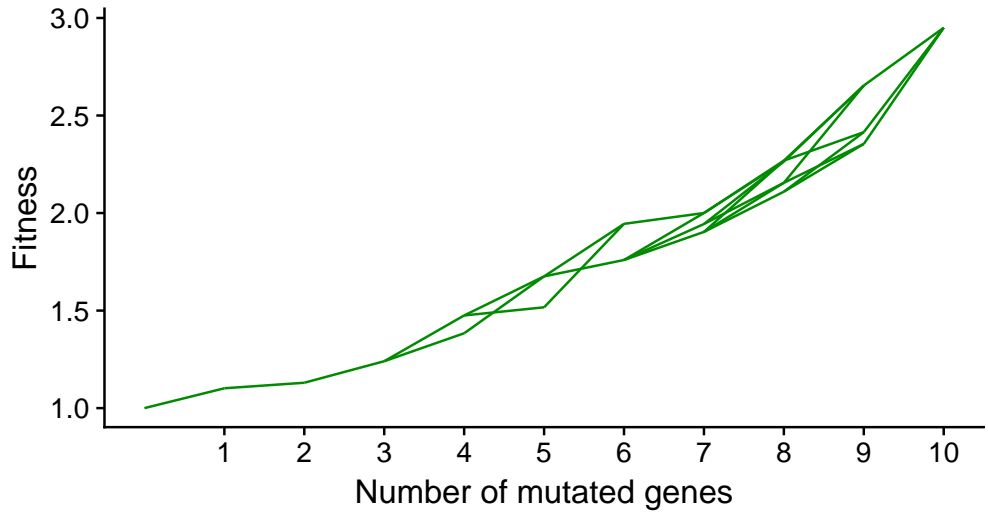

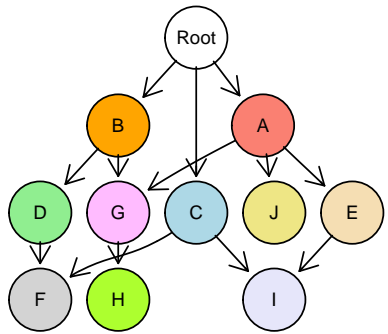

ID **J3M9zaA46iBzYO2**  
 acc genotypes **95**  
 peaks no back 1  
 removed edges 0  
 prop rem edges 0

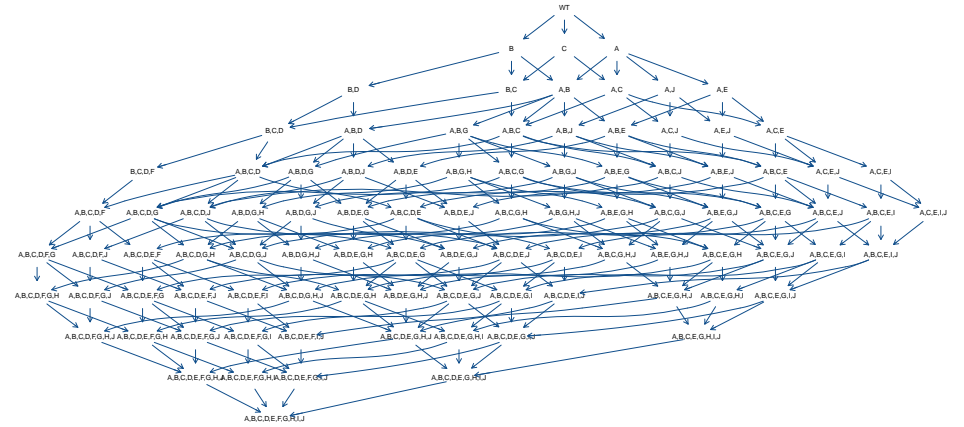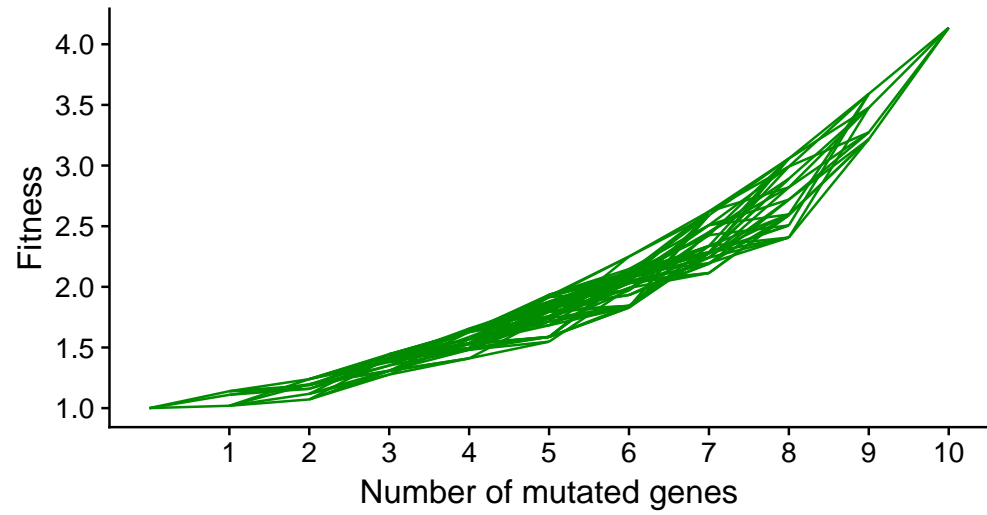

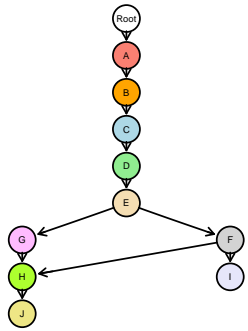

ID LKzTjEtauR10FkWvl  
 acc genotypes 15  
 peaks no back 1  
 removed edges 0  
 prop rem edges 0

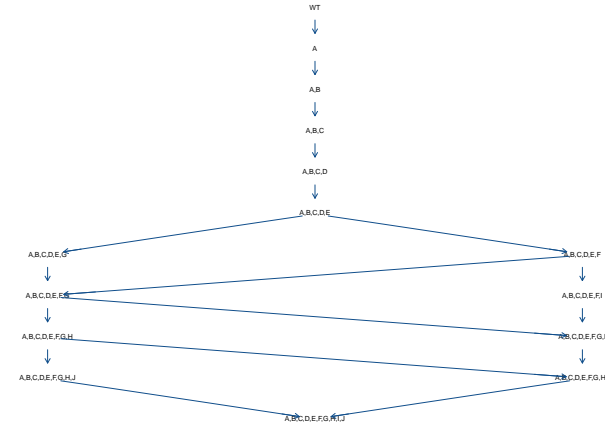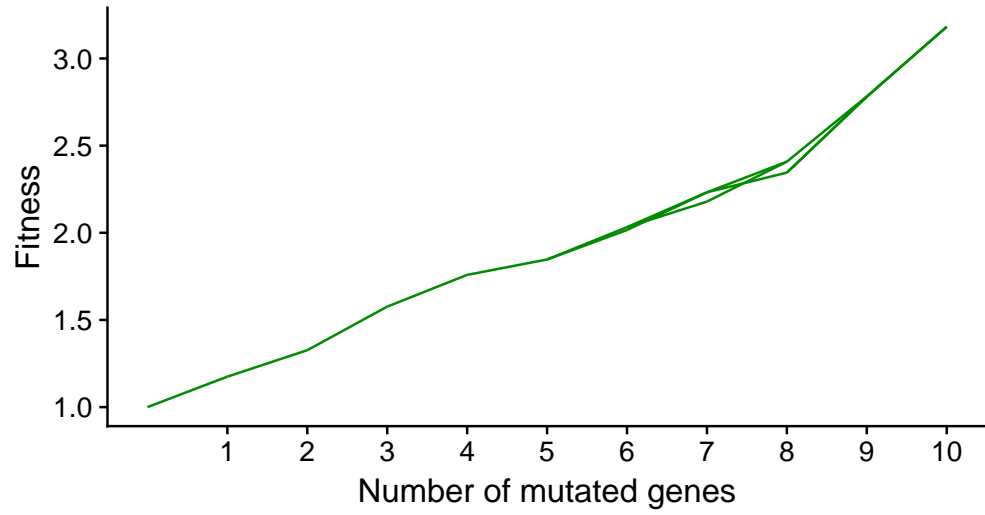

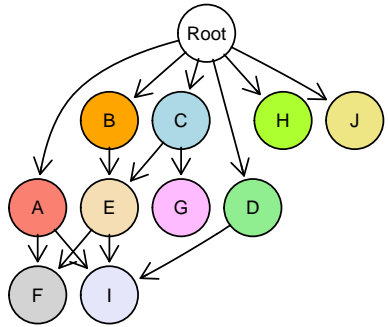

ID LLARXmNmlvPm7fLH  
 acc genotypes 160  
 peaks no back 1  
 removed edges 0  
 prop rem edges 0

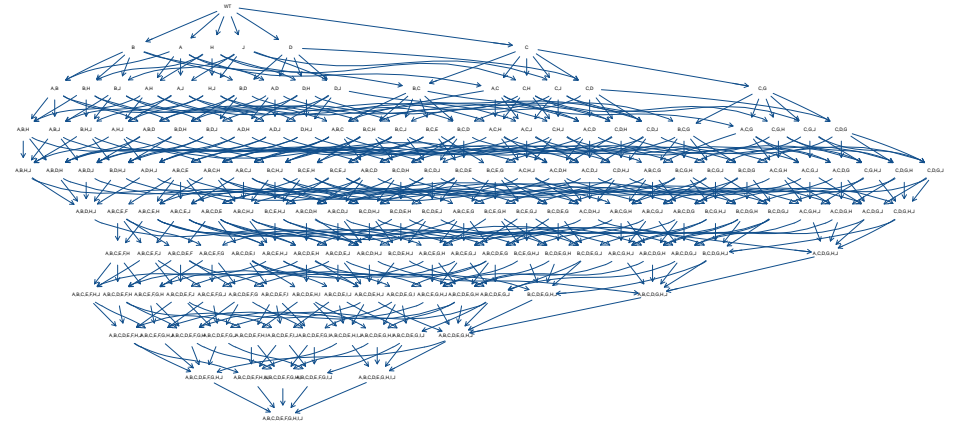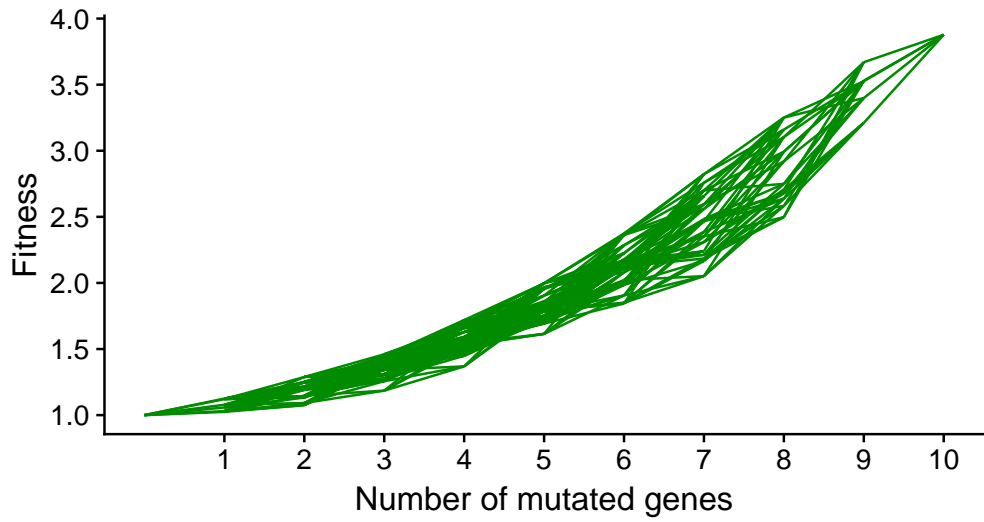

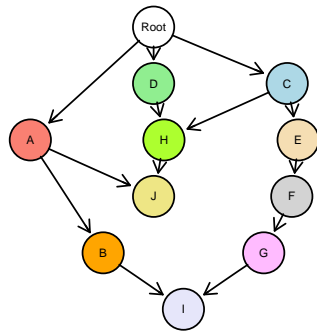

ID **LoVQjzyAttkUHwB8**  
 acc genotypes **54**  
 peaks no back 1  
 removed edges 0  
 prop rem edges 0

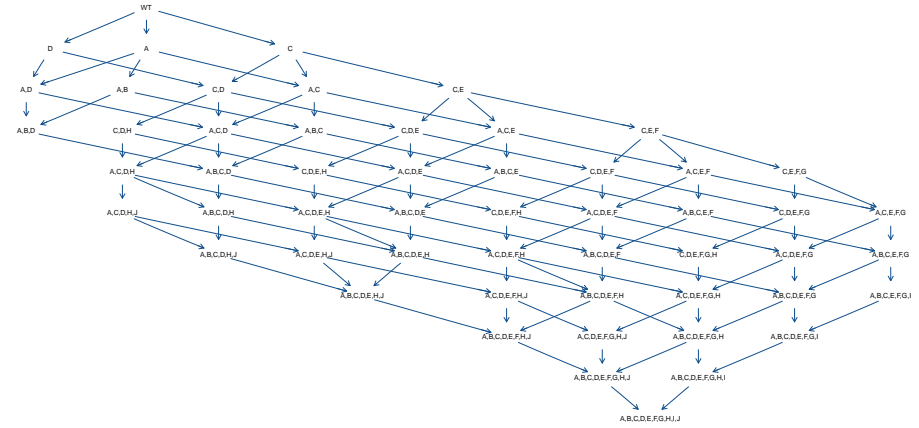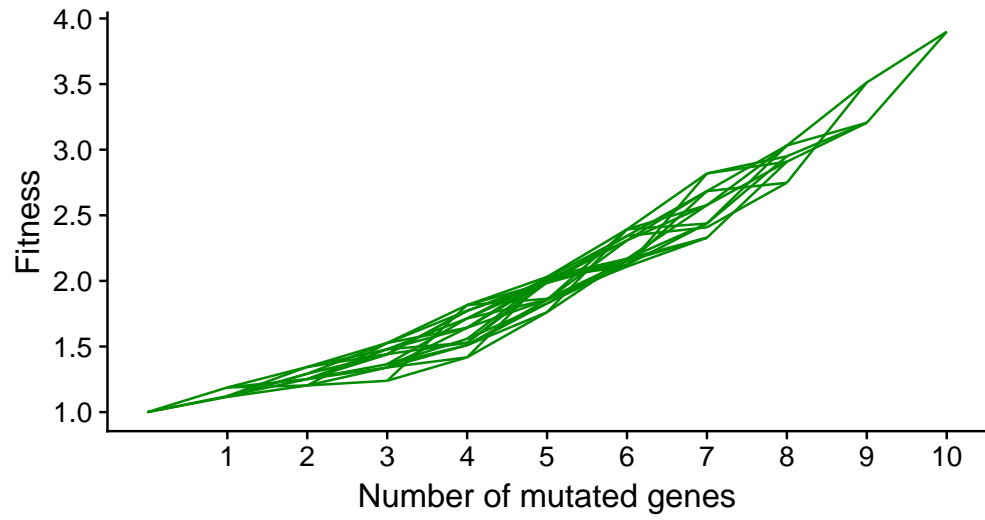

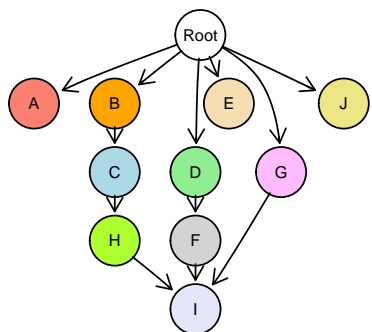

*ID* m2LJE5DdVShA9R9  
*acc genotypes* 200  
*peaks no back* 1  
*removed edges* 0  
*prop rem edges* 0

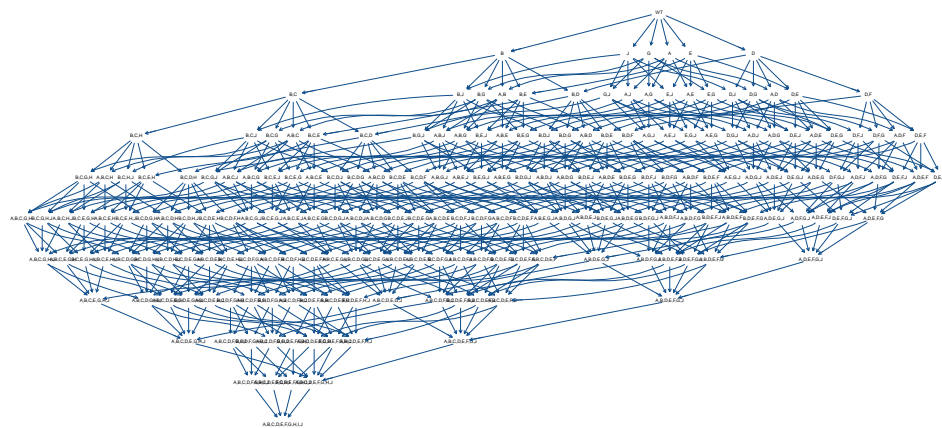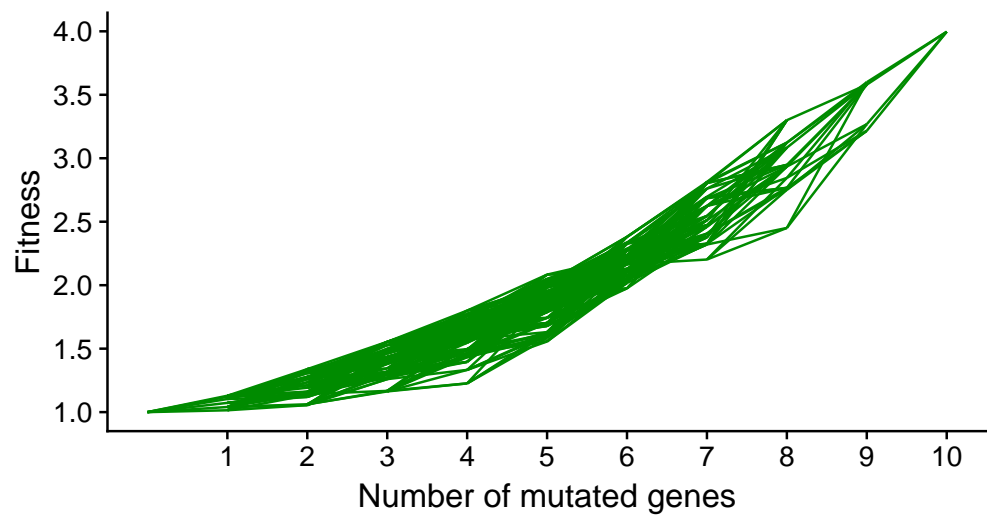

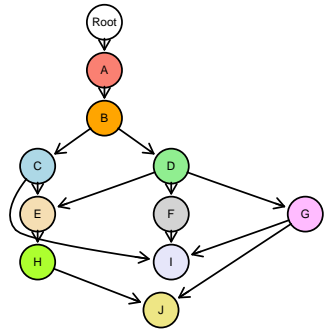

ID M5NjxUHUHAKU7nQF  
 acc genotypes 26  
 peaks no back 1  
 removed edges 0  
 prop rem edges 0

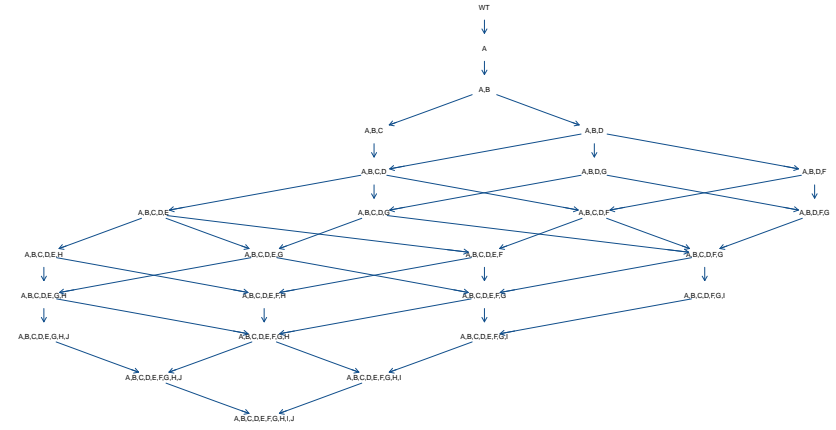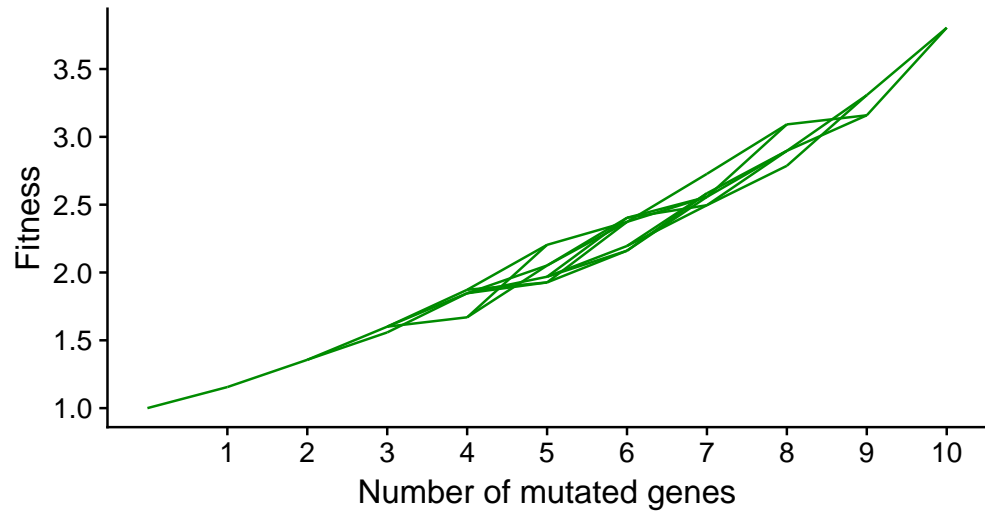



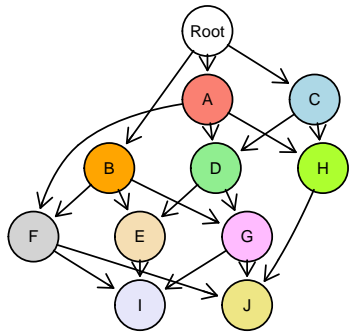

ID **MJxO4QrzOUXWzXM**  
 acc genotypes **36**  
 peaks no back **1**  
 removed edges **0**  
 prop rem edges **0**

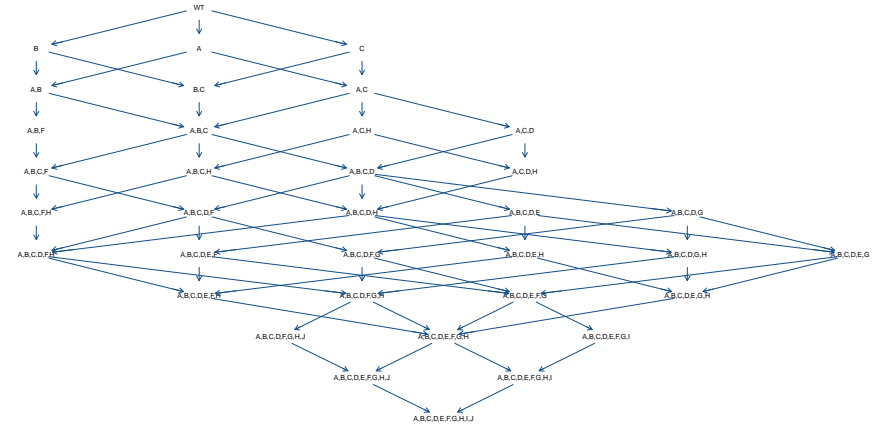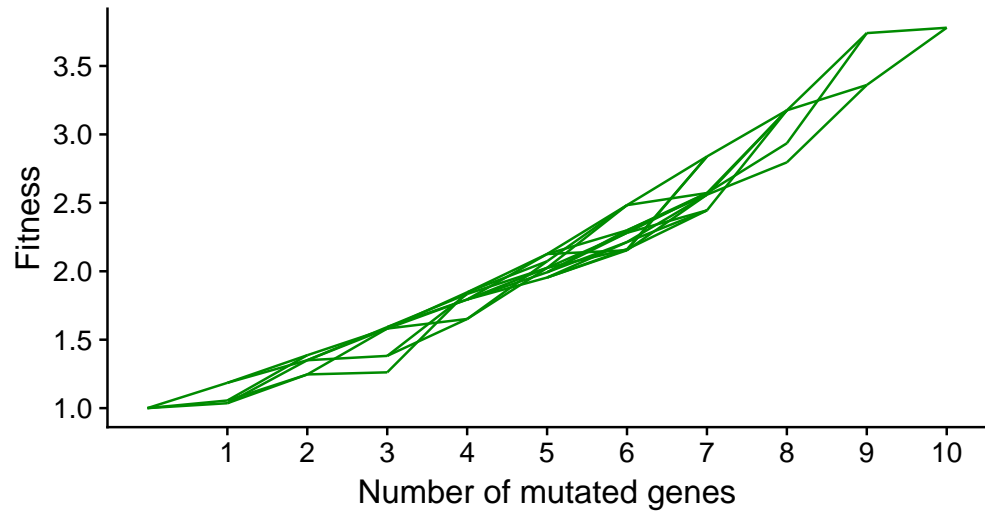

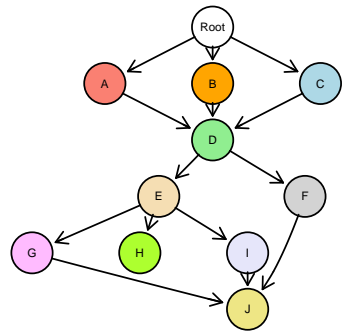

ID **MkJPmR2HWGDw34xG**  
 acc genotypes **28**  
 peaks no back 1  
 removed edges 0  
 prop rem edges 0

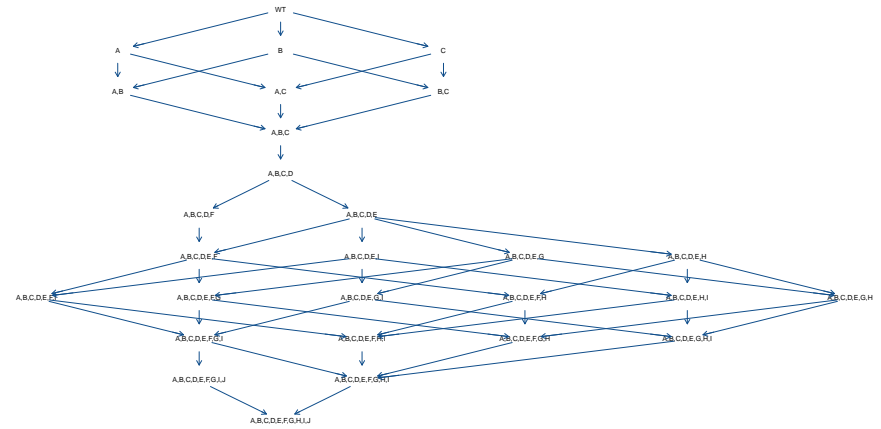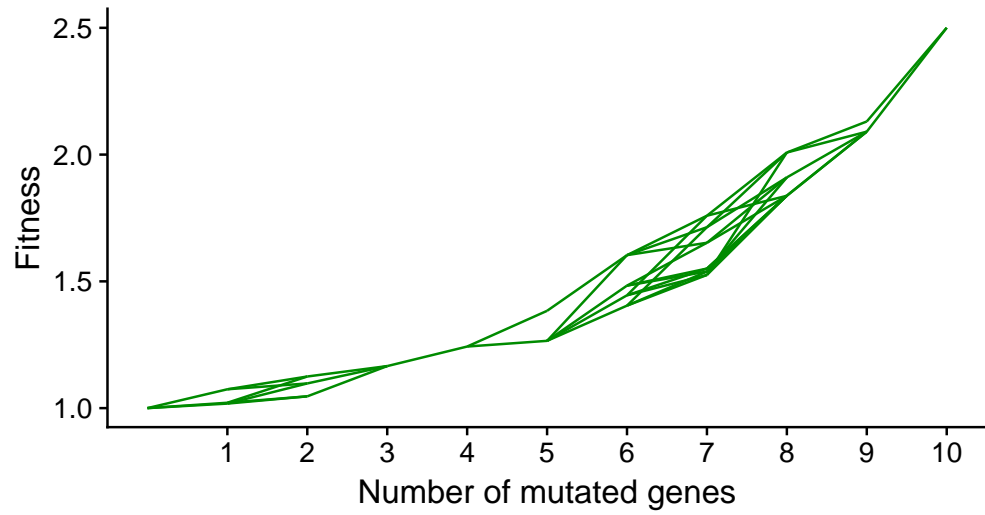

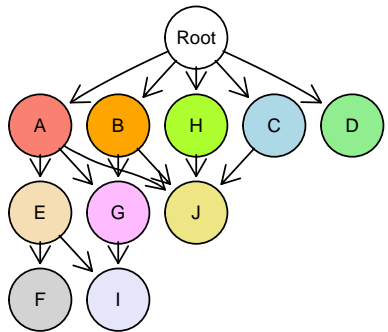

ID MocksvQ5er102Pjpk  
 acc genotypes 120  
 peaks no back 1  
 removed edges 0  
 prop rem edges 0

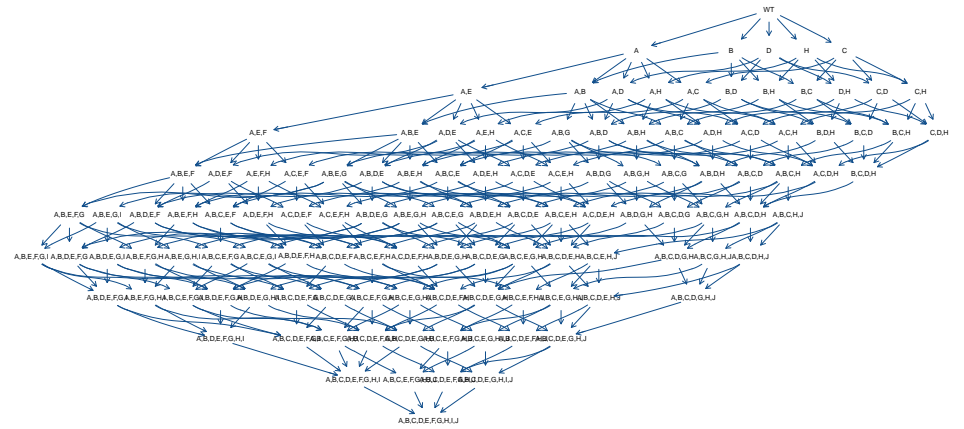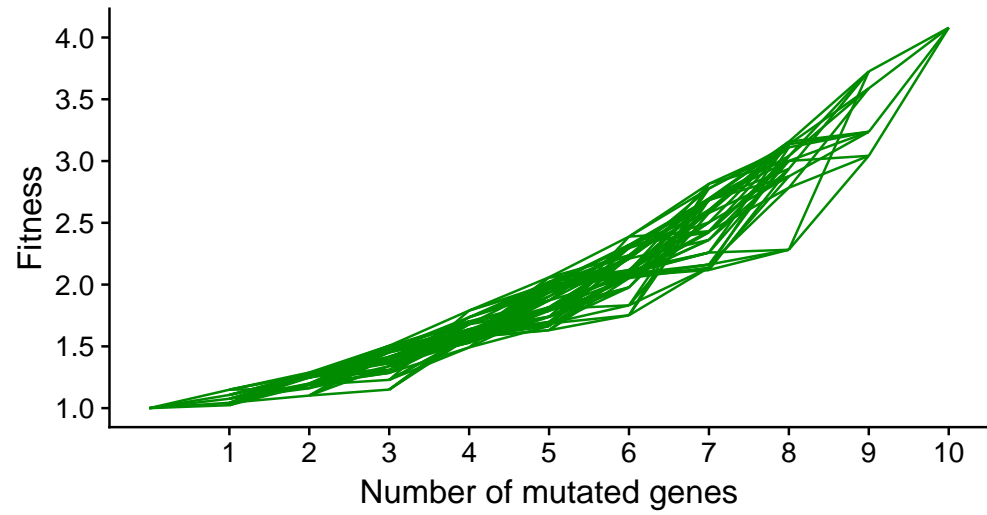

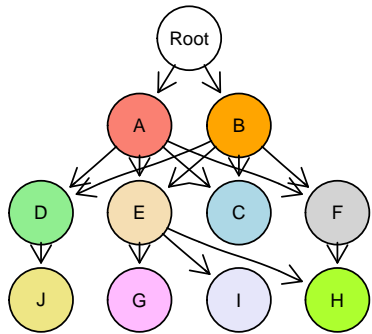

ID **MPXnkjvgPoPYXZbV**  
 acc genotypes **87**  
 peaks no back 1  
 removed edges 0  
 prop rem edges 0

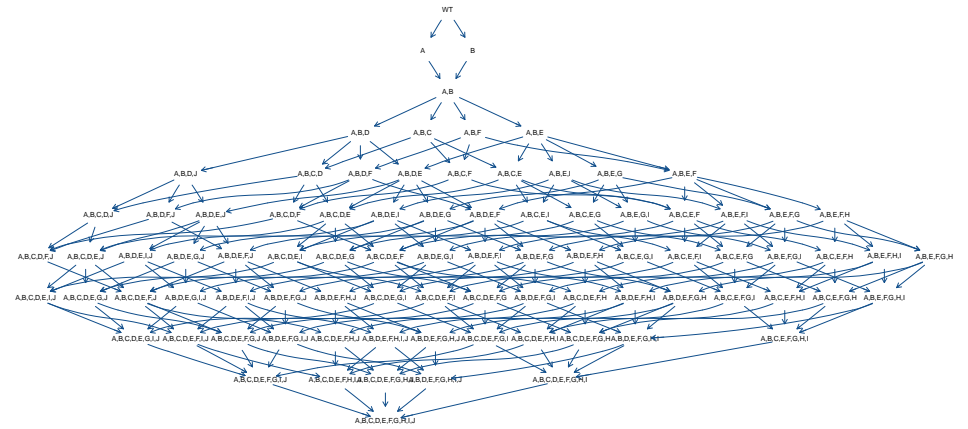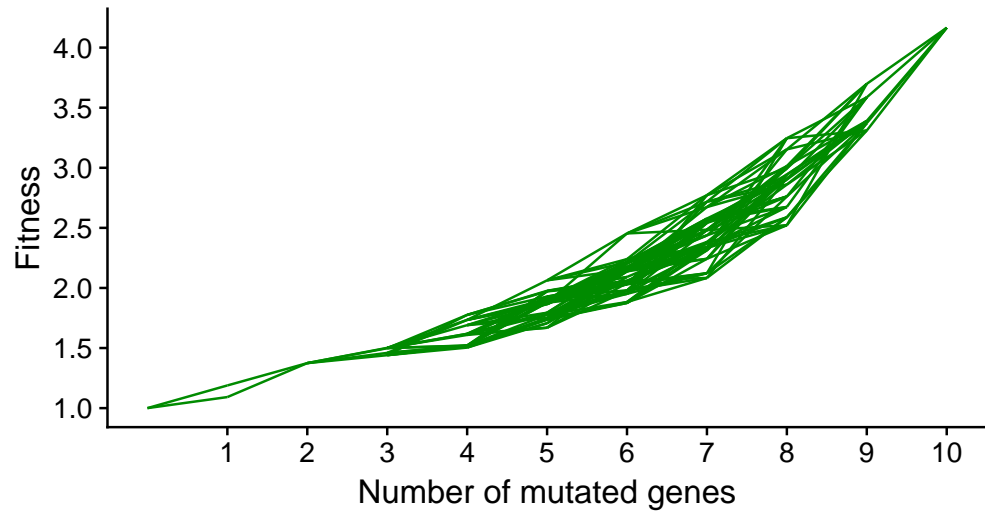

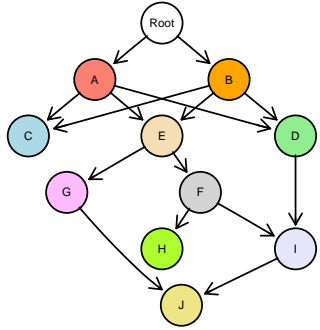

ID [msWBh10MLRgzEH10BX](#)  
 acc genotypes 43  
 peaks no back 1  
 removed edges 0  
 prop rem edges 0

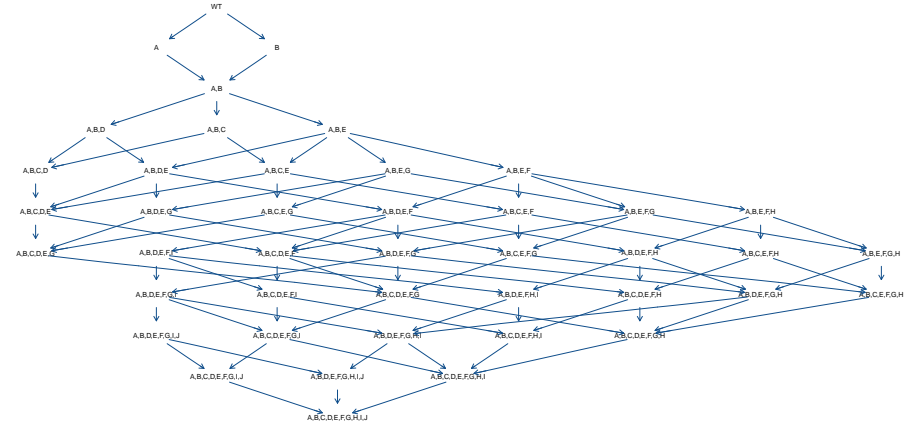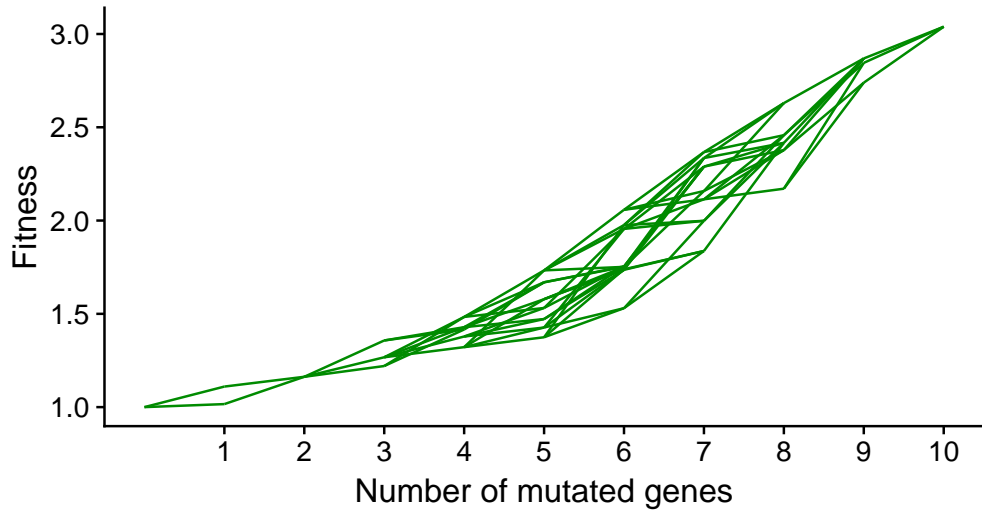

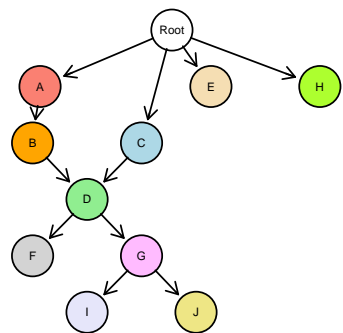

ID MT7WzjxZkqx10snFO  
 acc genotypes 64  
 peaks no back 1  
 removed edges 0  
 prop rem edges 0

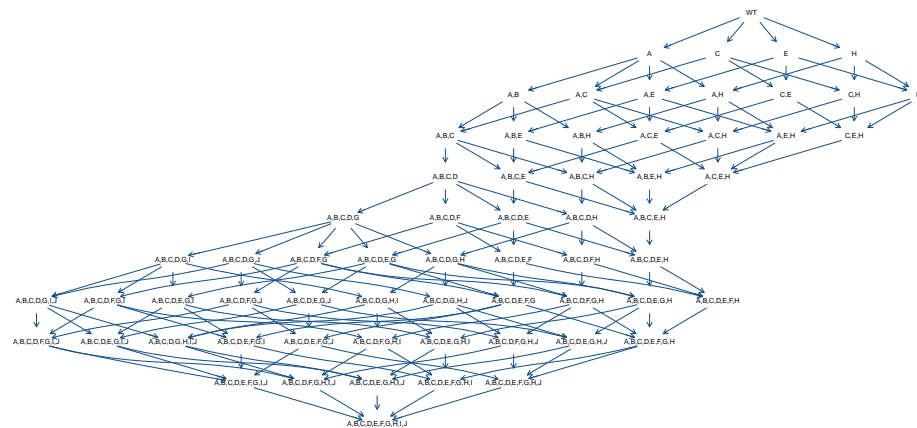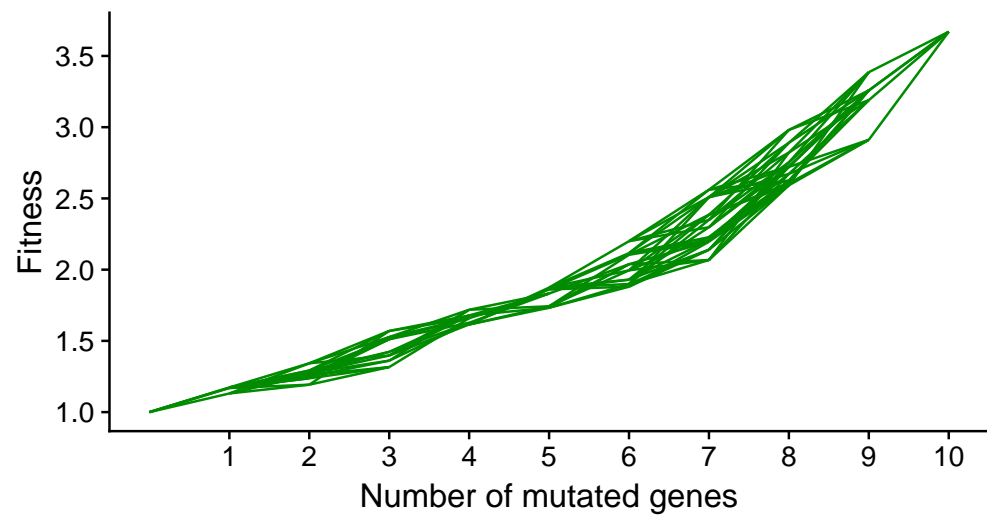

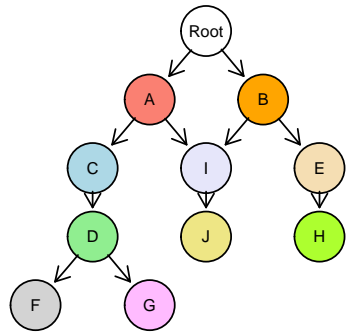

ID **n210BxEwpJXJV8VL6**  
 acc genotypes **64**  
 peaks no back 1  
 removed edges 0  
 prop rem edges 0

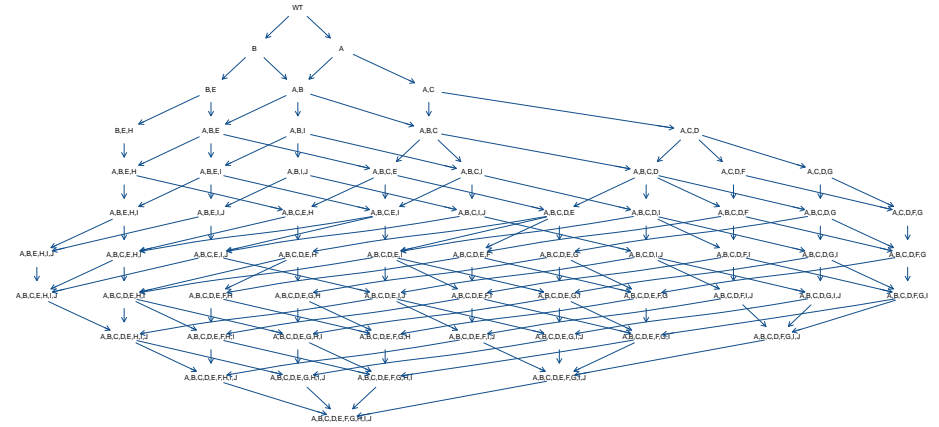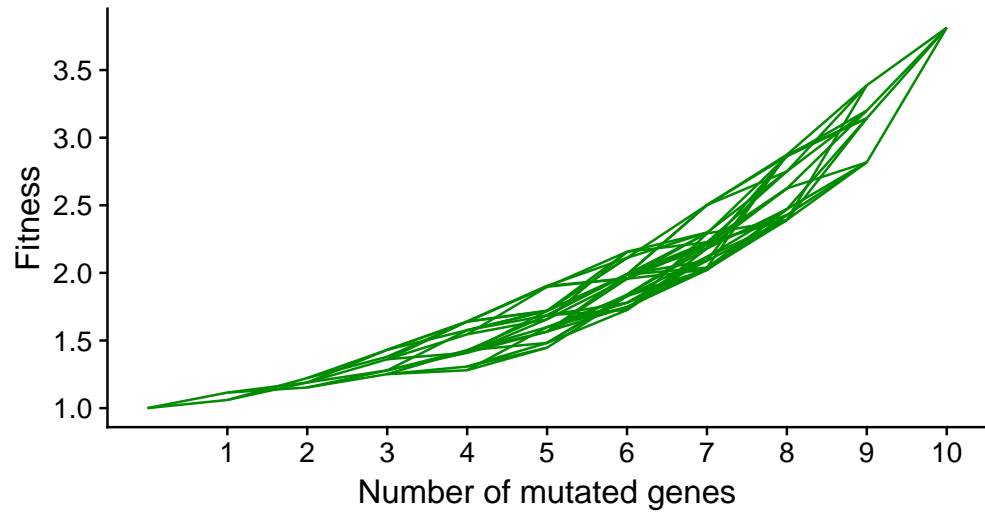

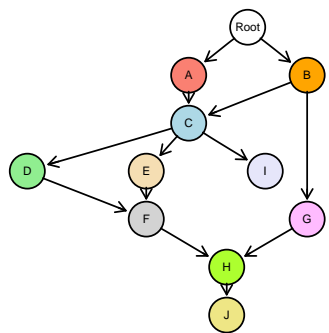

ID Nd5tXtGonmFk3JtF  
 acc genotypes 30  
 peaks no back 1  
 removed edges 0  
 prop rem edges 0

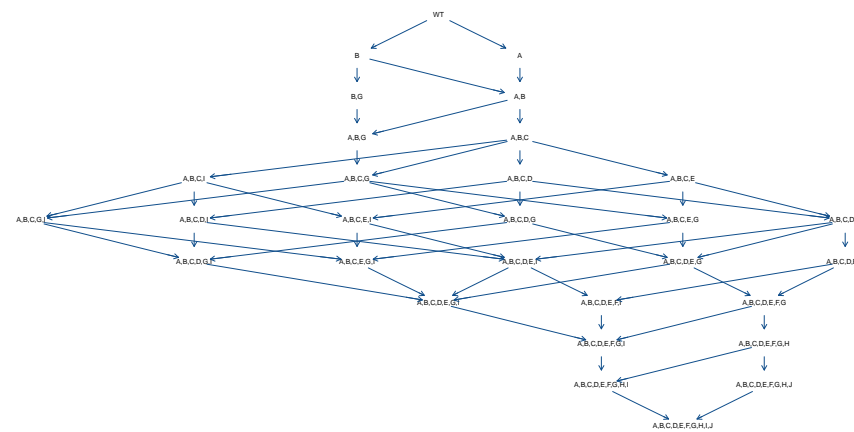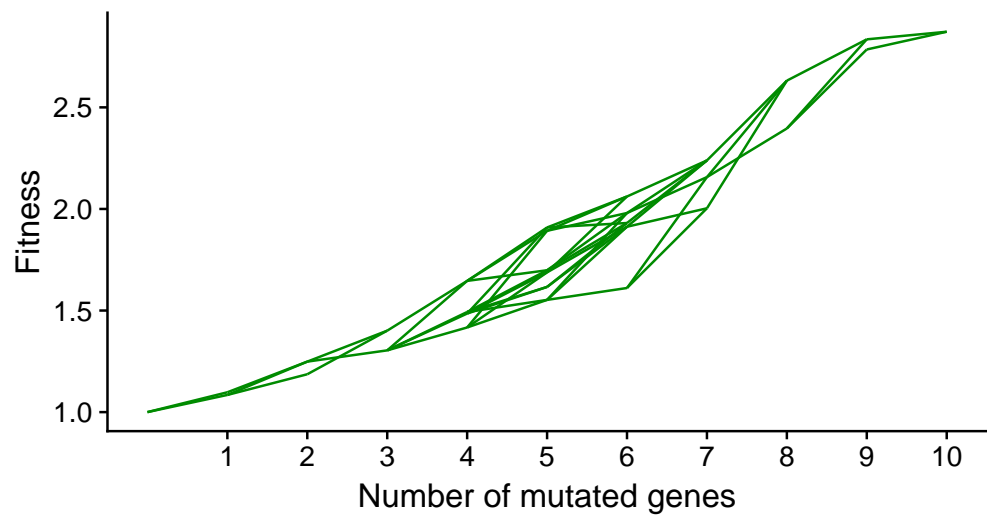



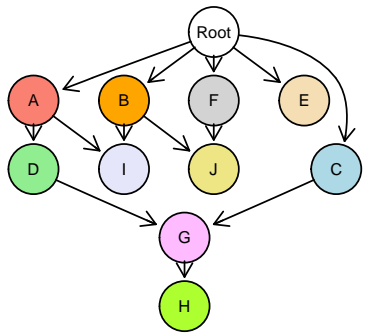

ID **nfjDxDAtFc4uTrco**  
 acc genotypes **116**  
 peaks no back 1  
 removed edges 0  
 prop rem edges 0

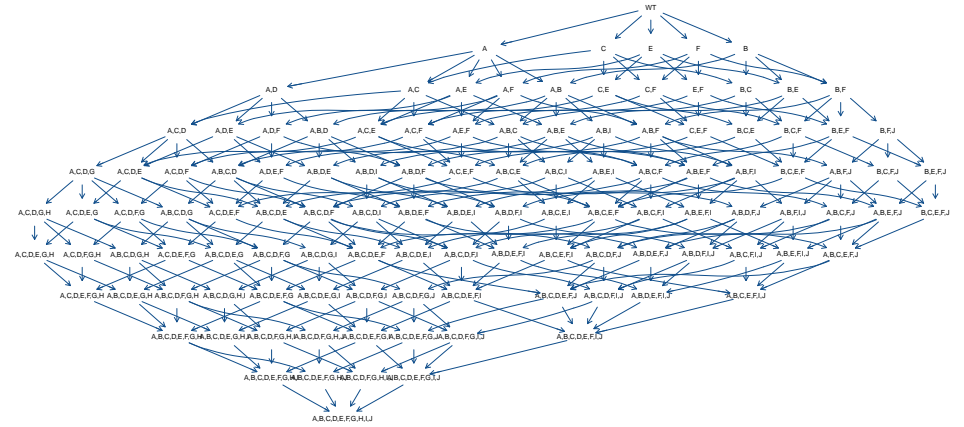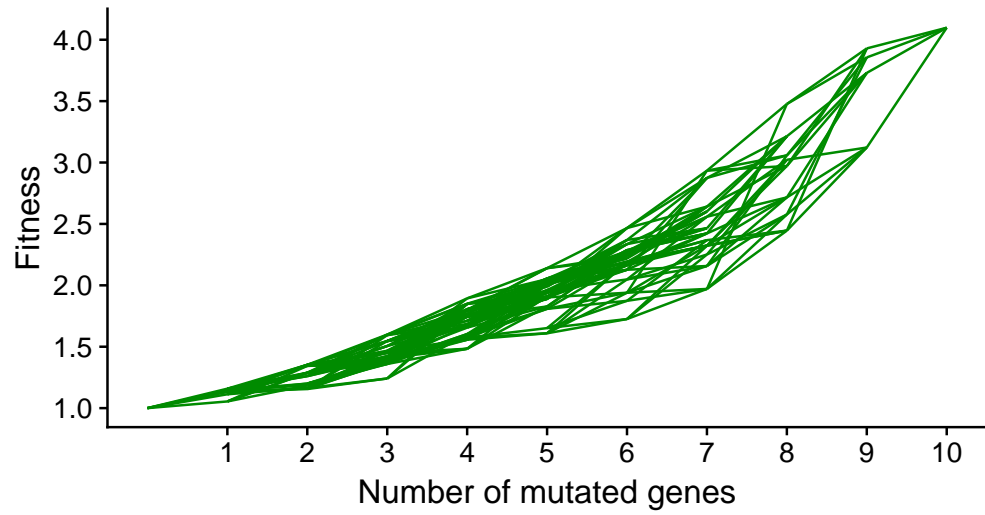

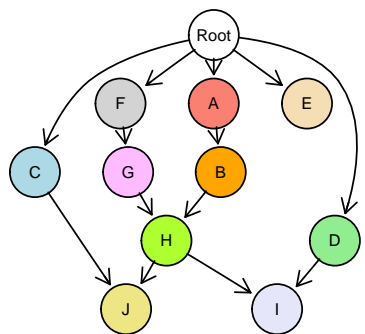

ID **nO5yu7D15ZhqKnN9**  
 acc genotypes **90**  
 peaks no back 1  
 removed edges 0  
 prop rem edges 0

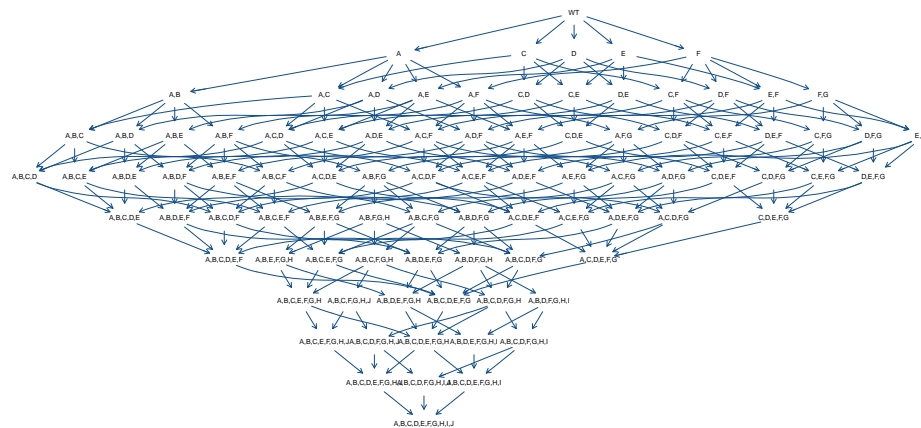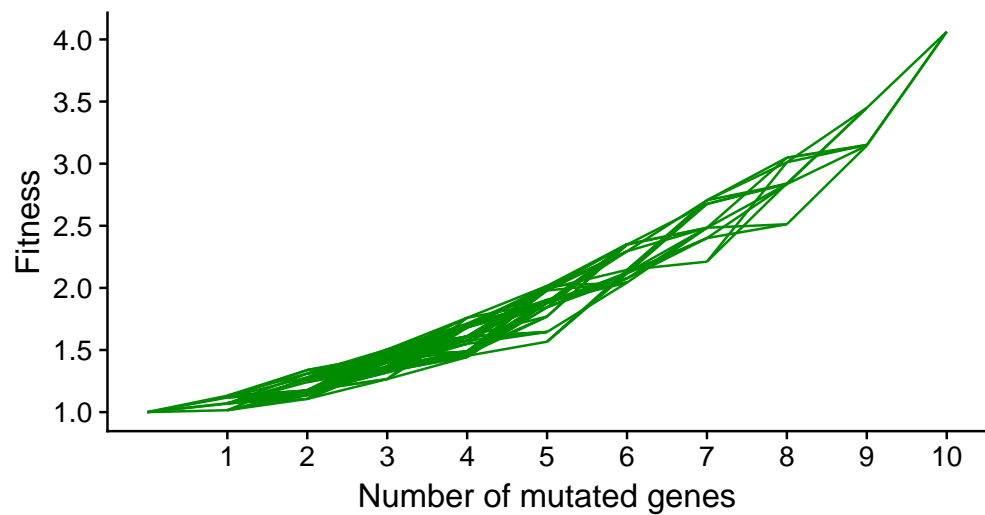

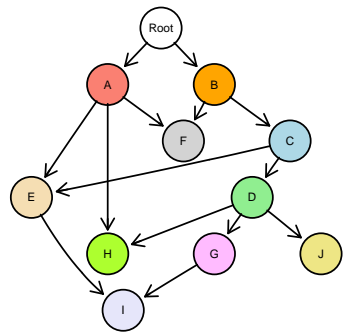

ID NP7ssqpSWvlesNBx  
 acc genotypes 54  
 peaks no back 1  
 removed edges 0  
 prop rem edges 0

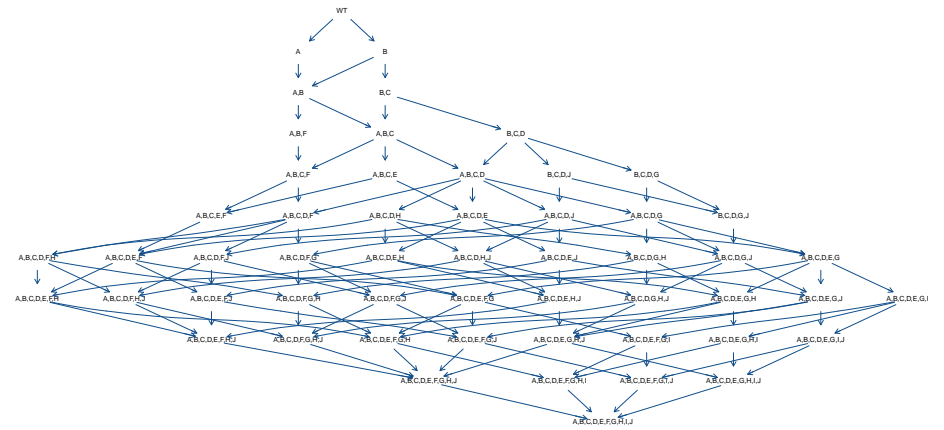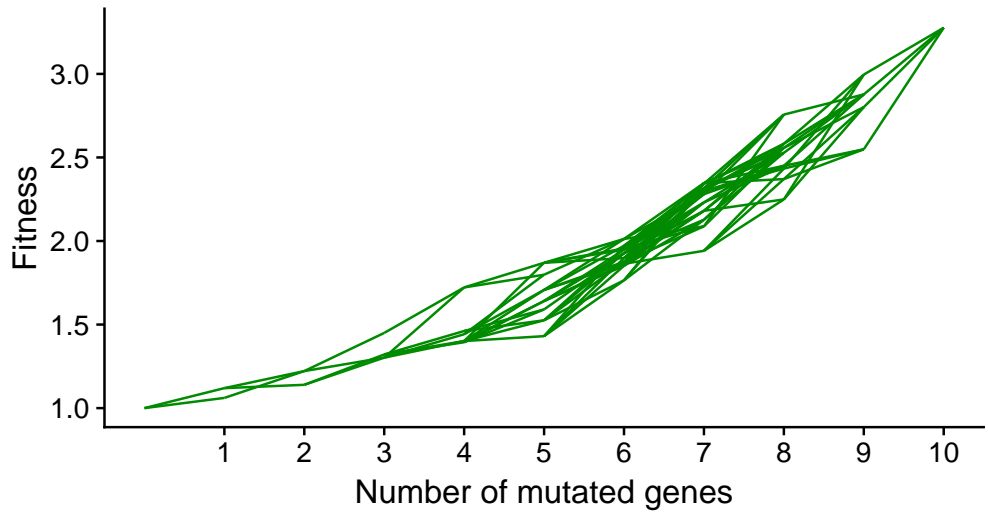

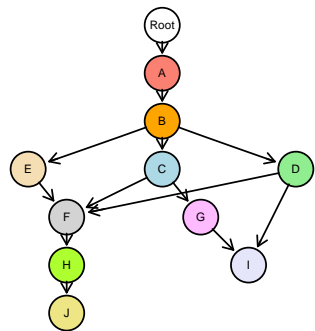

ID NyMcE3XWsePNxuEs  
 acc genotypes 25  
 peaks no back 1  
 removed edges 0  
 prop rem edges 0

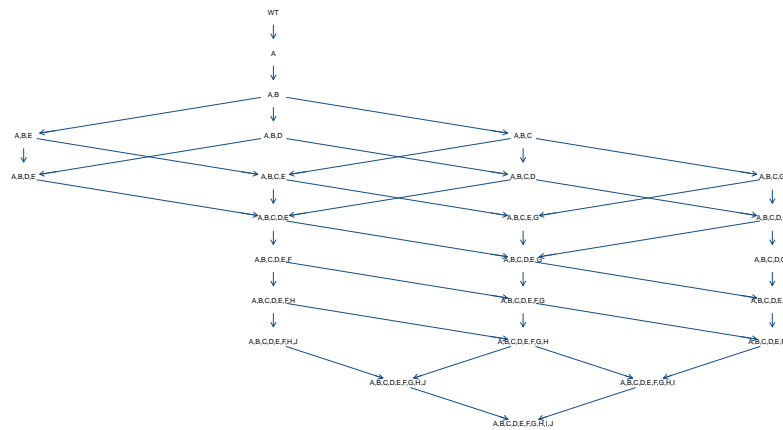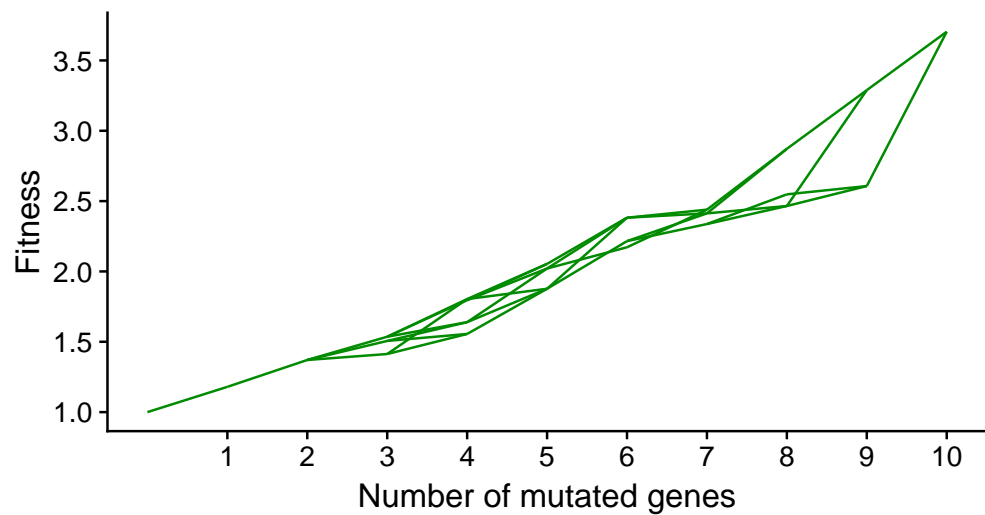

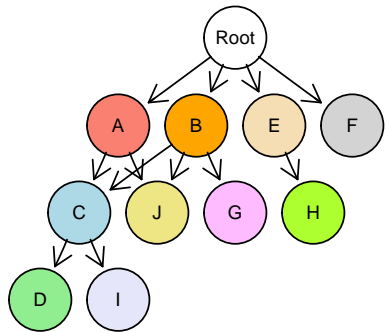

ID o10BaslJKzTznq5sp  
 acc genotypes 144  
 peaks no back 1  
 removed edges 0  
 prop rem edges 0

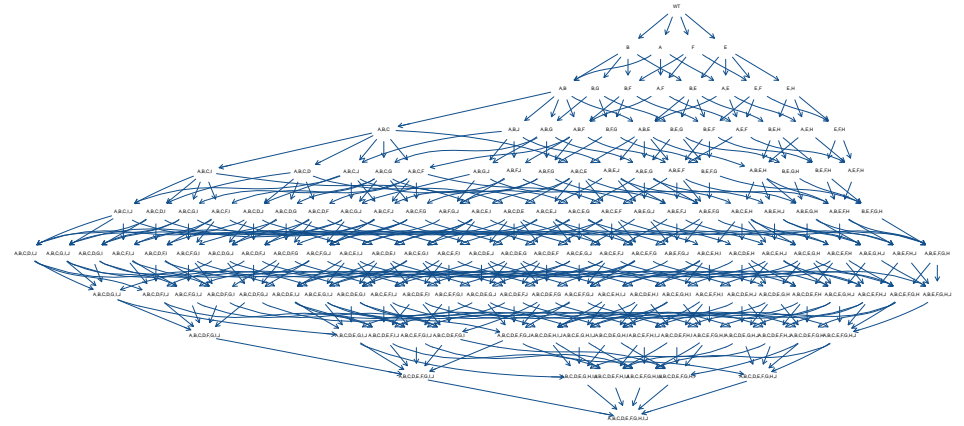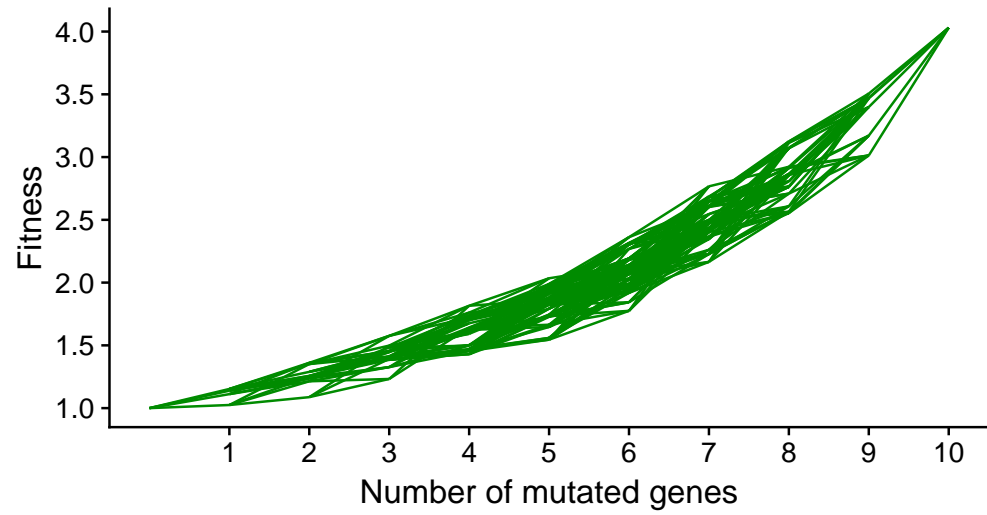

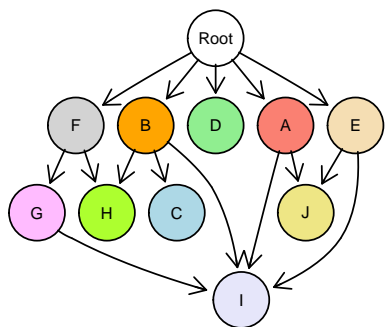

ID **o89L6ak94kWOZRNA**  
 acc genotypes **146**  
 peaks no back 1  
 removed edges 0  
 prop rem edges 0

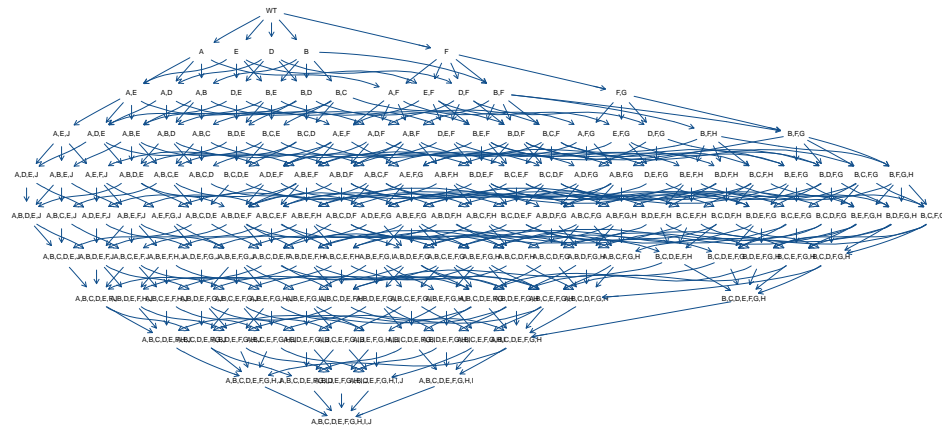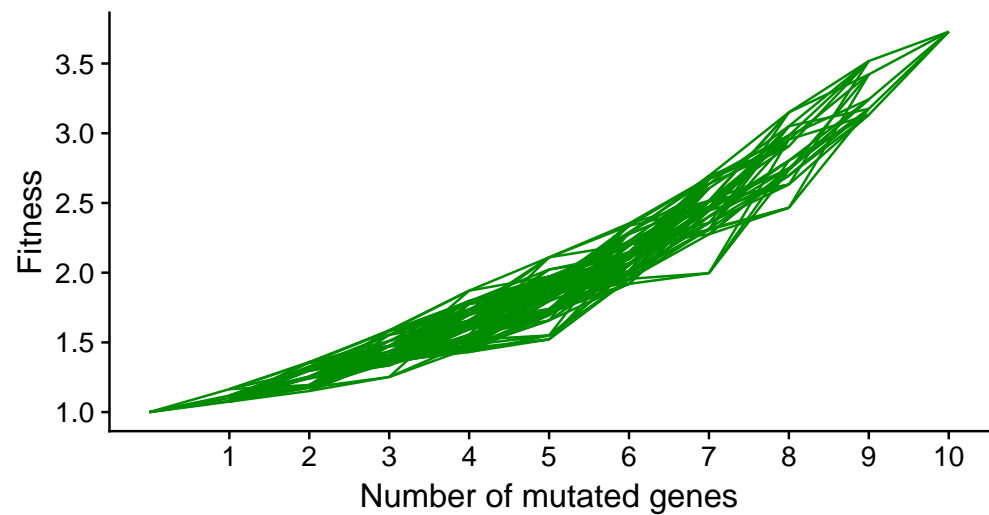

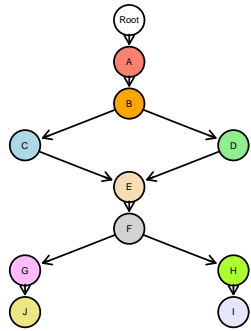

ID **ocx2Aw4wa94NsR64**  
 acc genotypes **16**  
 peaks no back 1  
 removed edges 0  
 prop rem edges 0

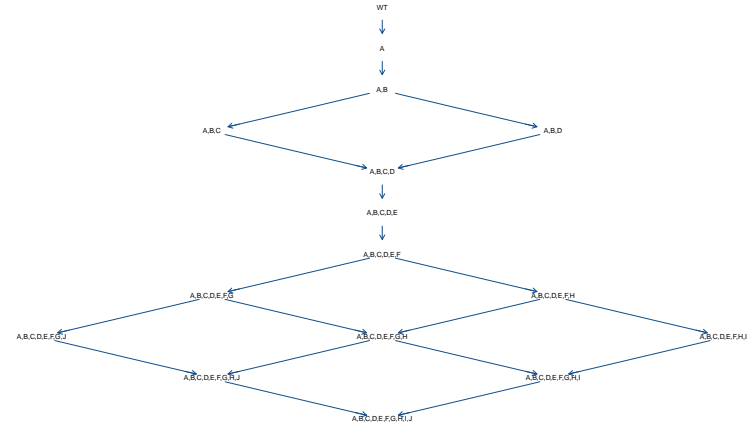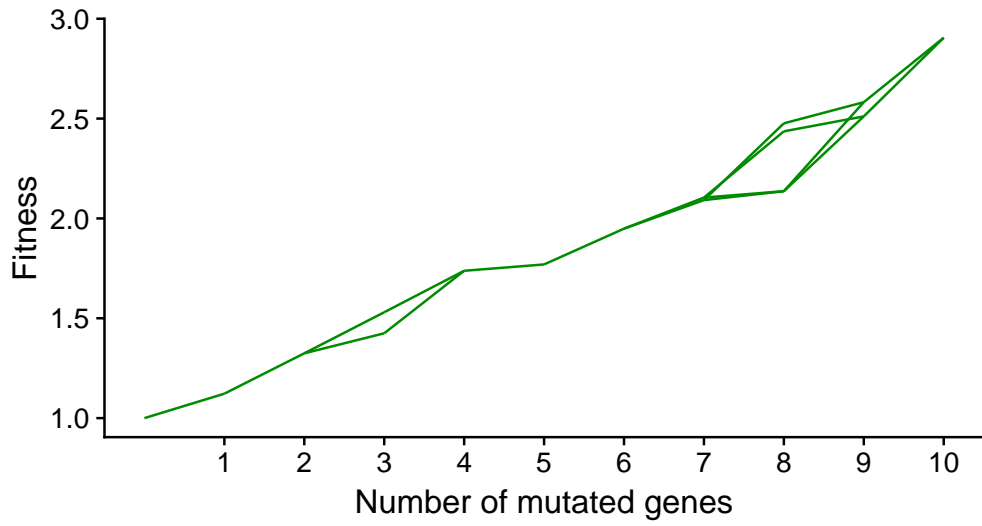

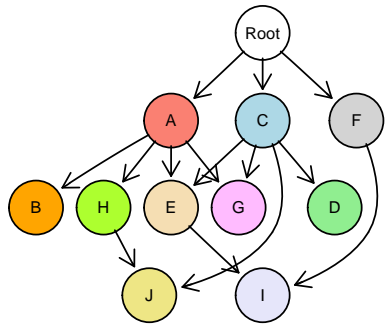

ID **0GeUcOzxp4J7ocOW**  
 acc genotypes **134**  
 peaks no back 1  
 removed edges 0  
 prop rem edges 0

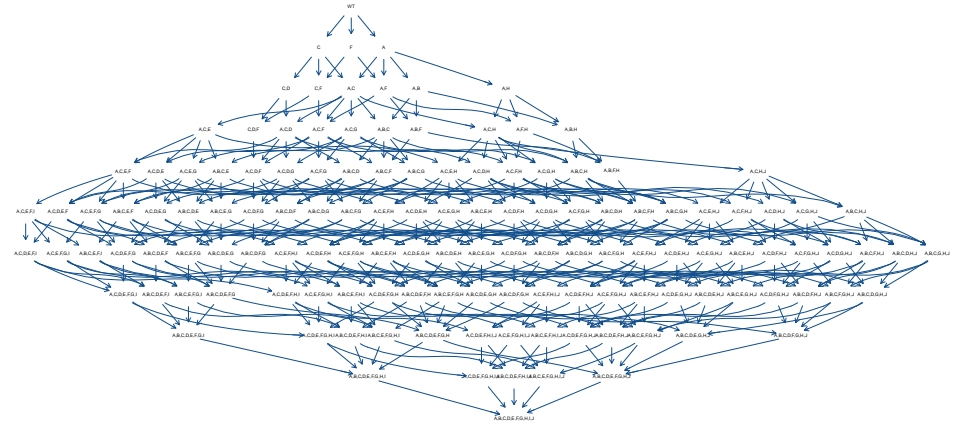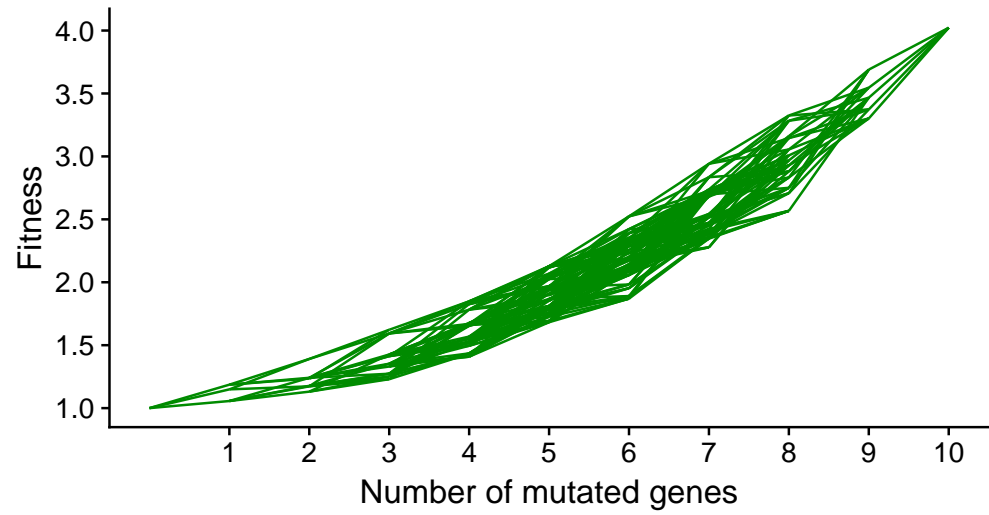



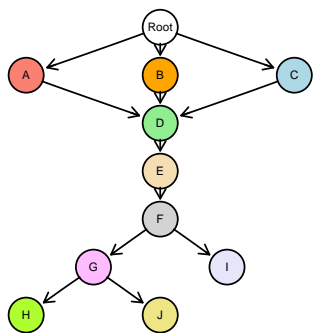

ID **oGhD99FEVEPwA8X8**  
 acc genotypes **20**  
 peaks no back 1  
 removed edges 0  
 prop rem edges 0

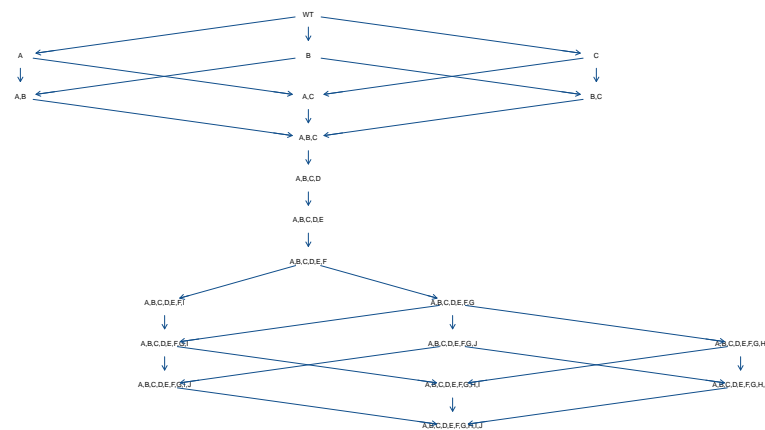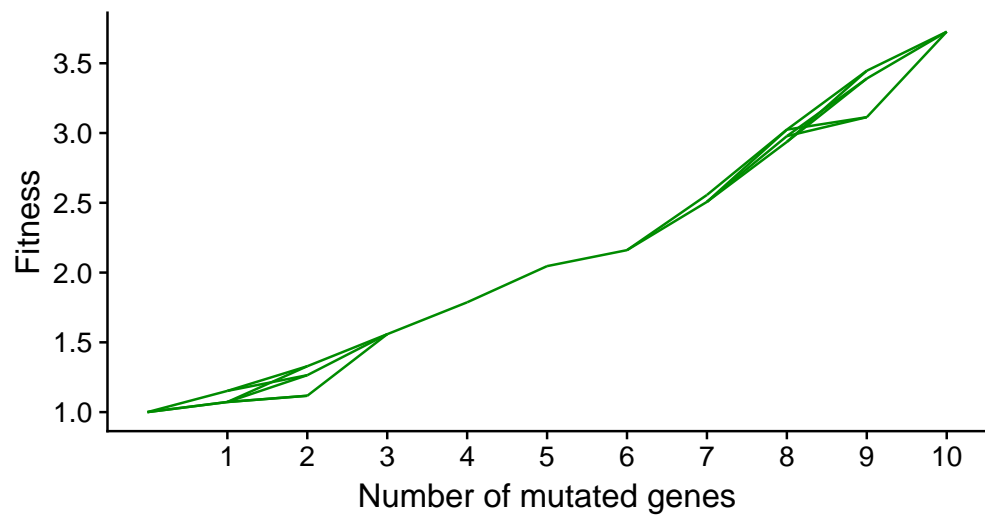

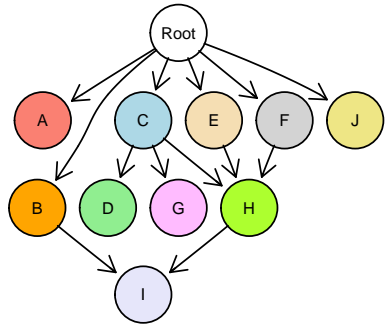

ID **ohfmWmj2mPmljDEY**  
 acc genotypes **208**  
 peaks no back 1  
 removed edges 0  
 prop rem edges 0

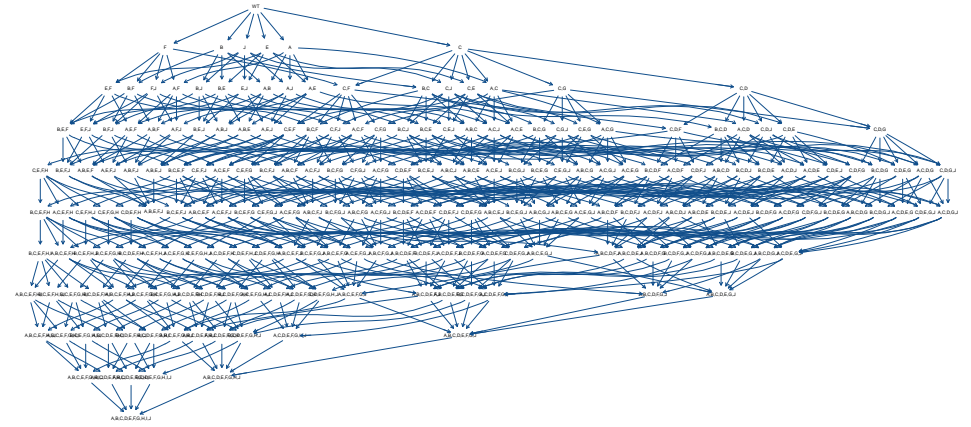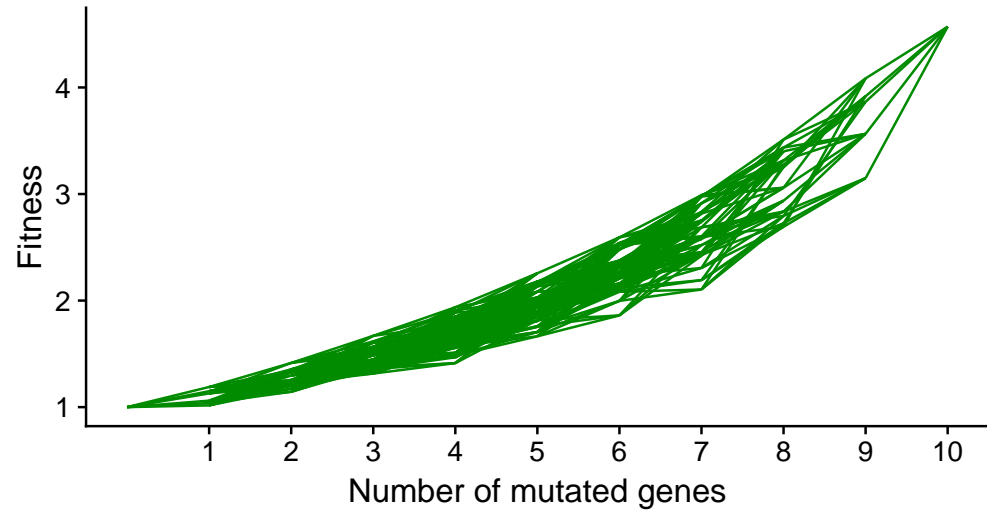

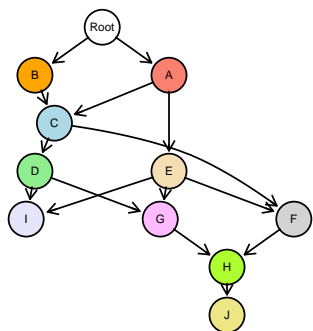

ID [oRJlh1e10mdF10GFUm](#)  
 acc genotypes 22  
 peaks no back 1  
 removed edges 0  
 prop rem edges 0

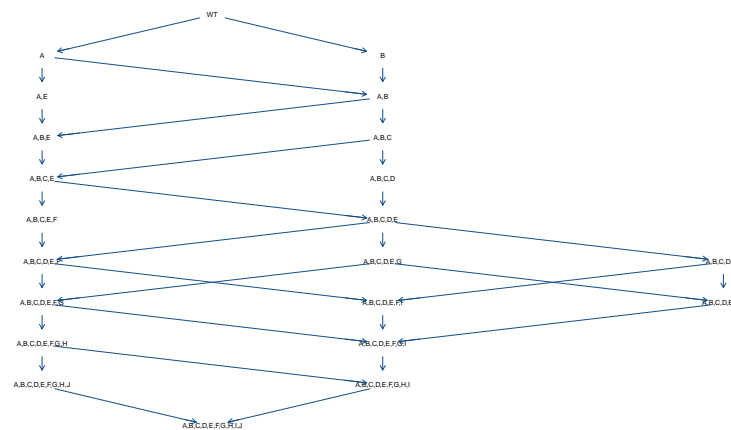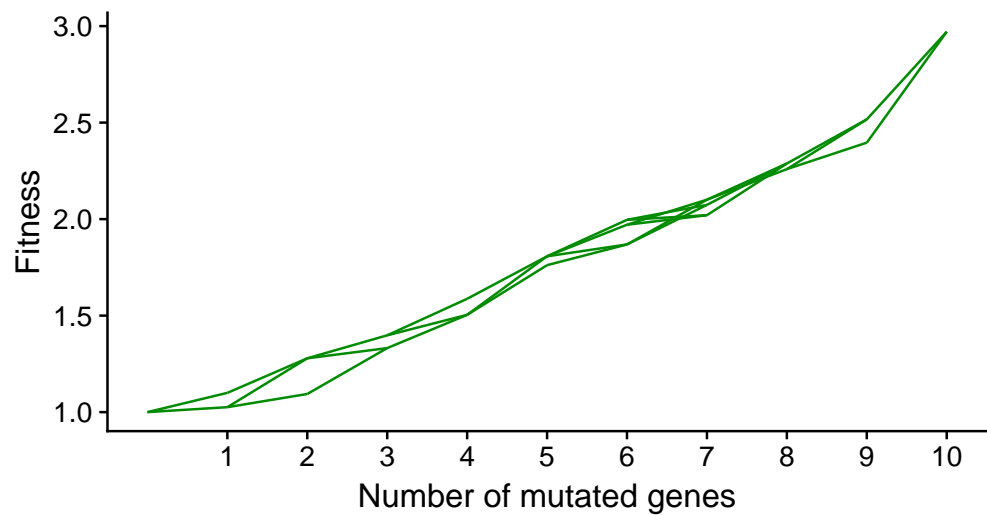

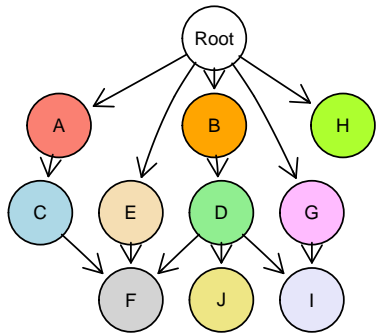

ID **PEUXKMJo1Ym7Cv4Z**  
 acc genotypes **132**  
 peaks no back 1  
 removed edges 0  
 prop rem edges 0

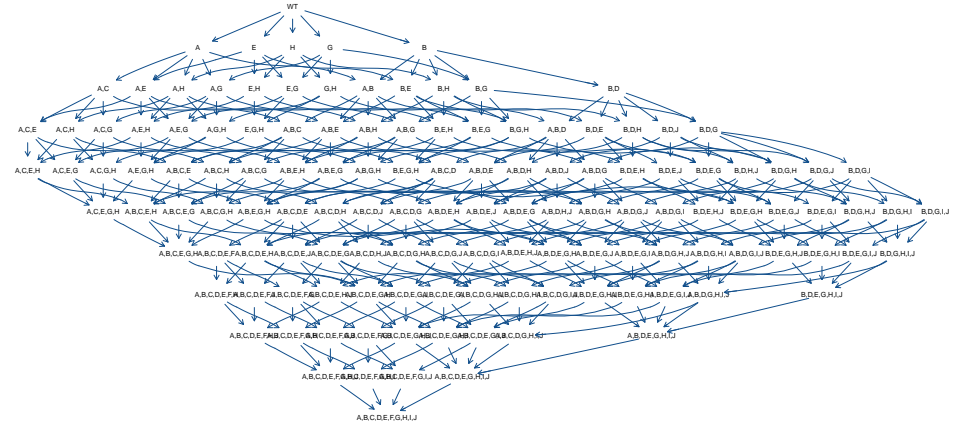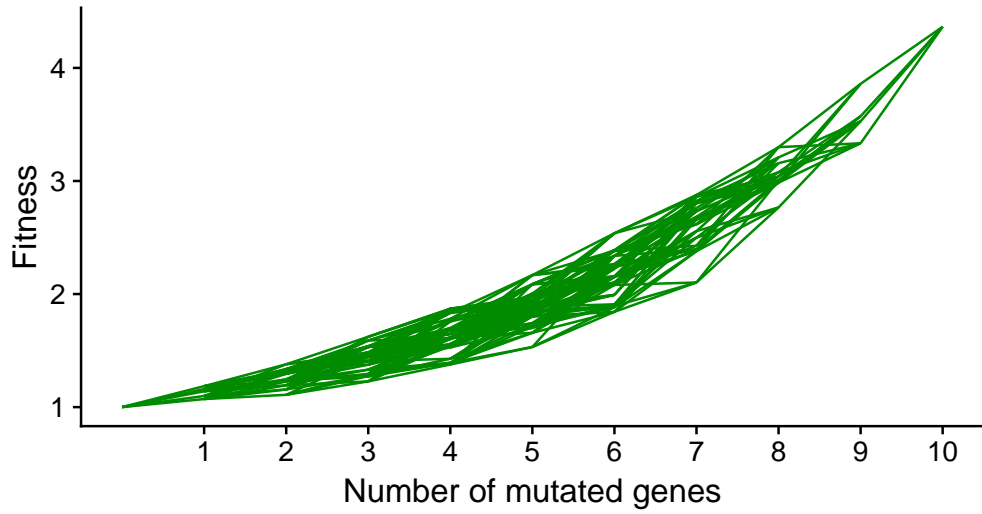

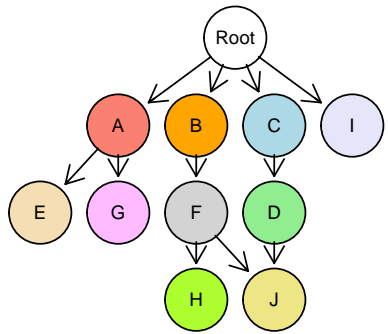

ID **PhaG1vE1MZA6aPS7**  
 acc genotypes **140**  
 peaks no back 1  
 removed edges 0  
 prop rem edges 0

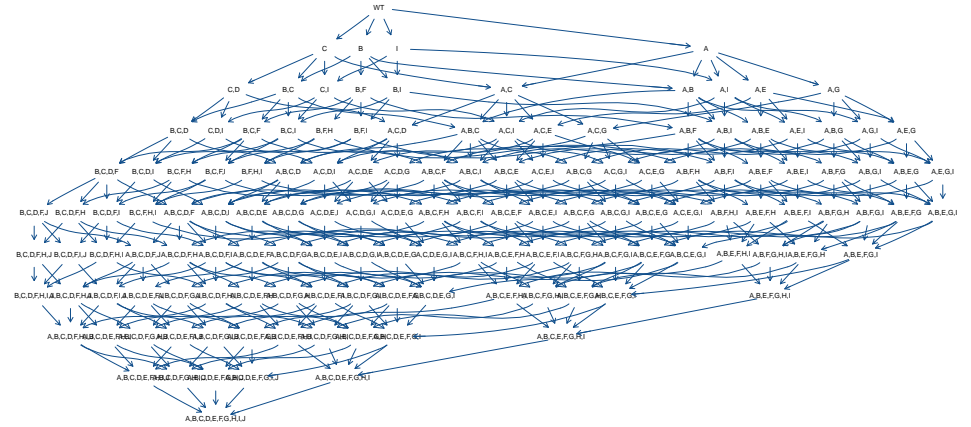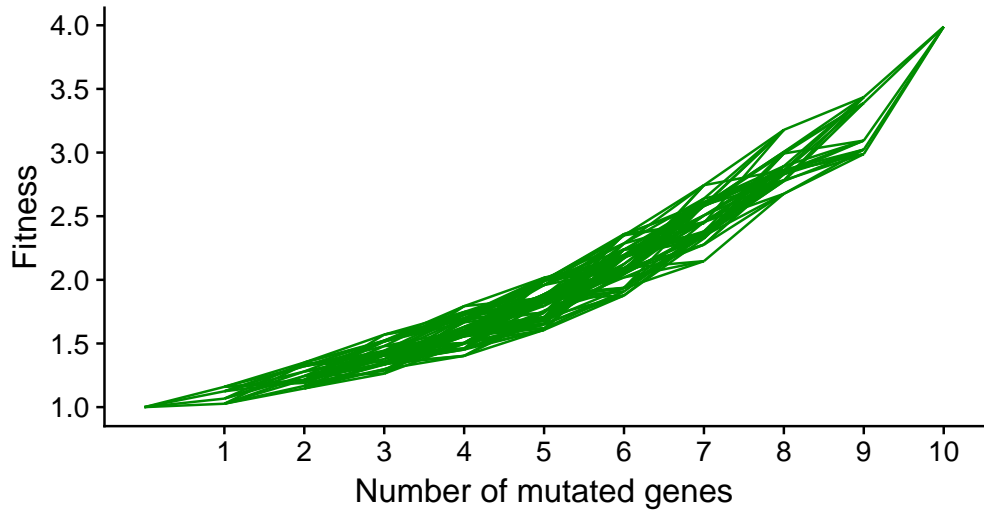

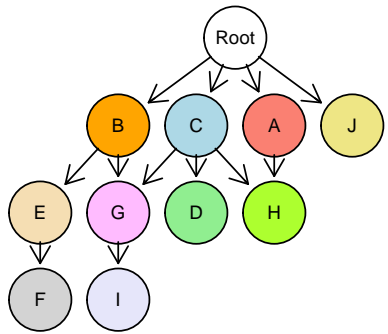

ID **PI10ybVHbxKrShrRr**  
 acc genotypes **136**  
 peaks no back 1  
 removed edges 0  
 prop rem edges 0

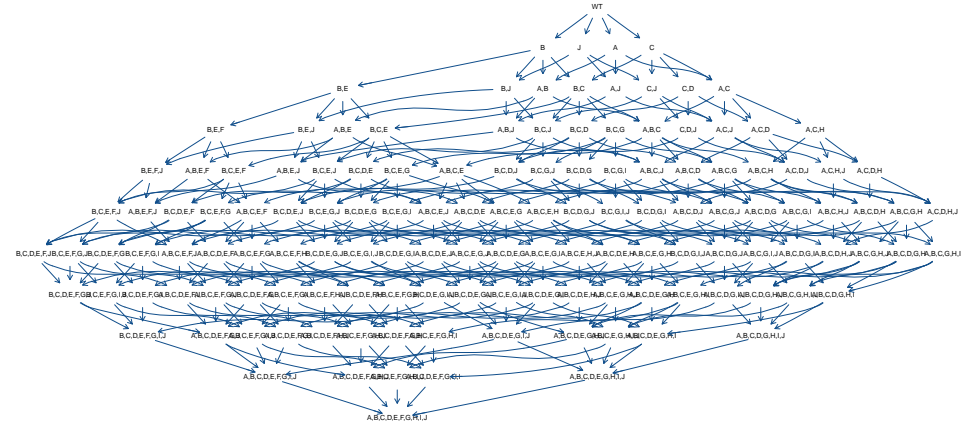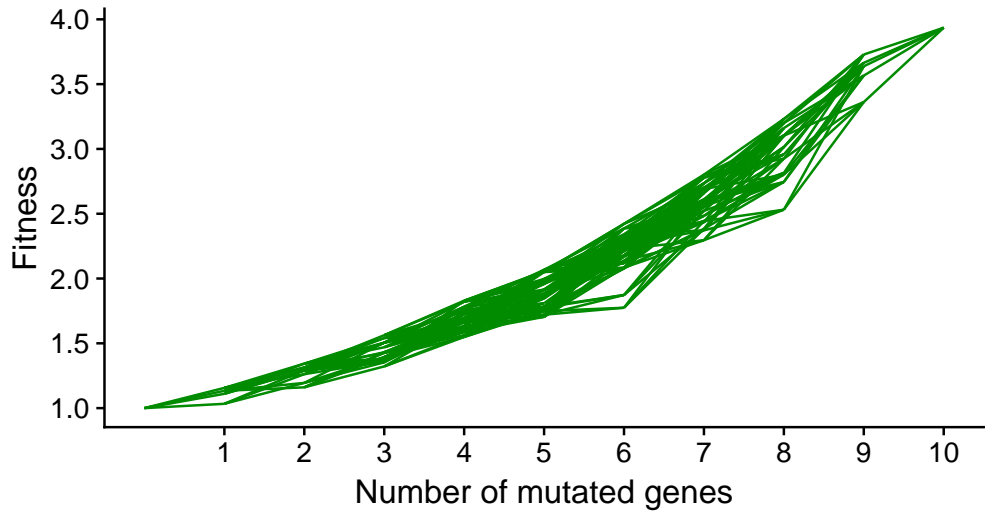

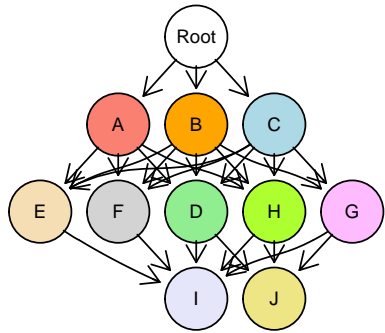

ID **pTNzMT9igvRrZIpi**  
 acc genotypes **46**  
 peaks no back 1  
 removed edges 0  
 prop rem edges 0

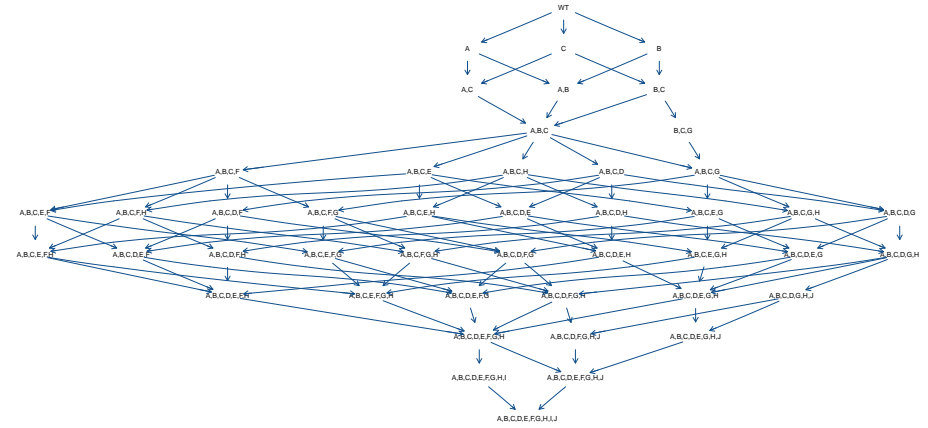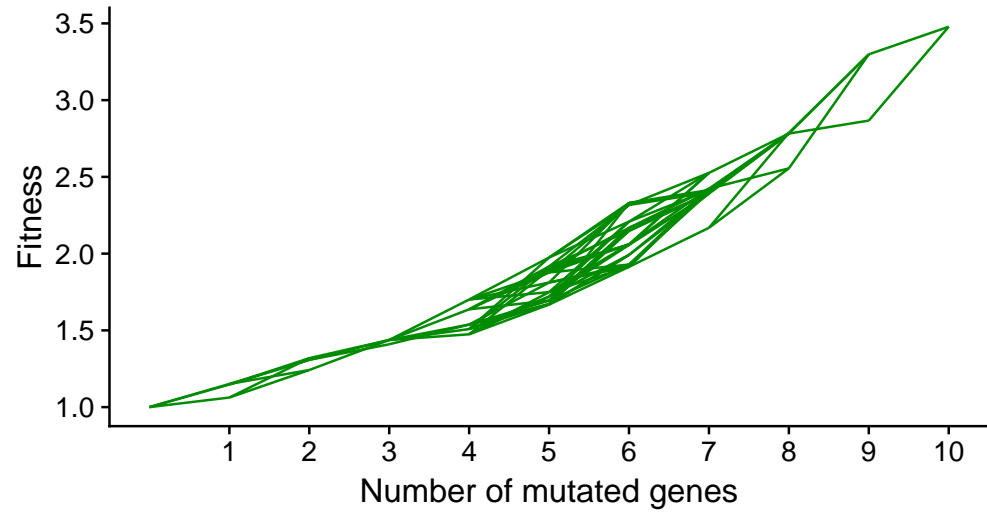

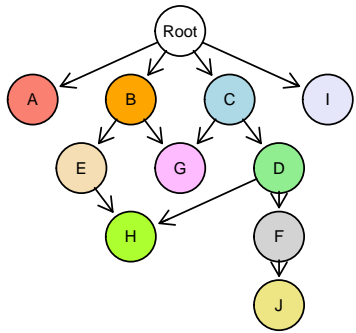

ID Pu5M3F61IUoT6zBD  
 acc genotypes 116  
 peaks no back 1  
 removed edges 0  
 prop rem edges 0

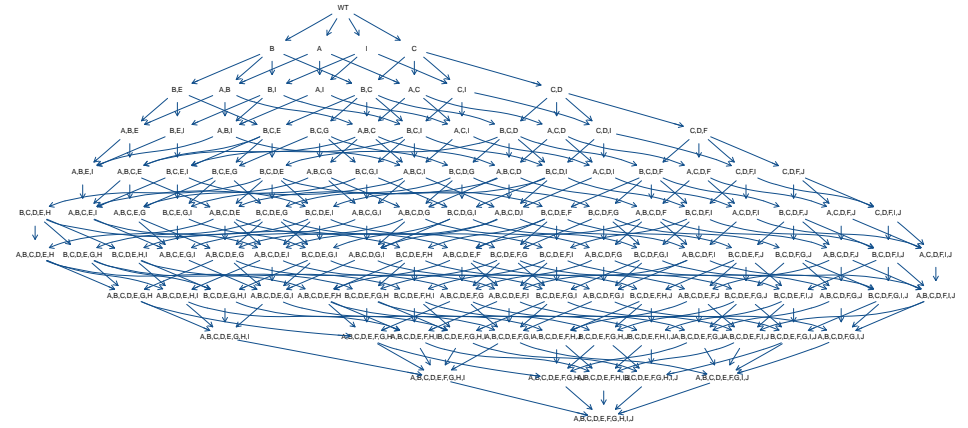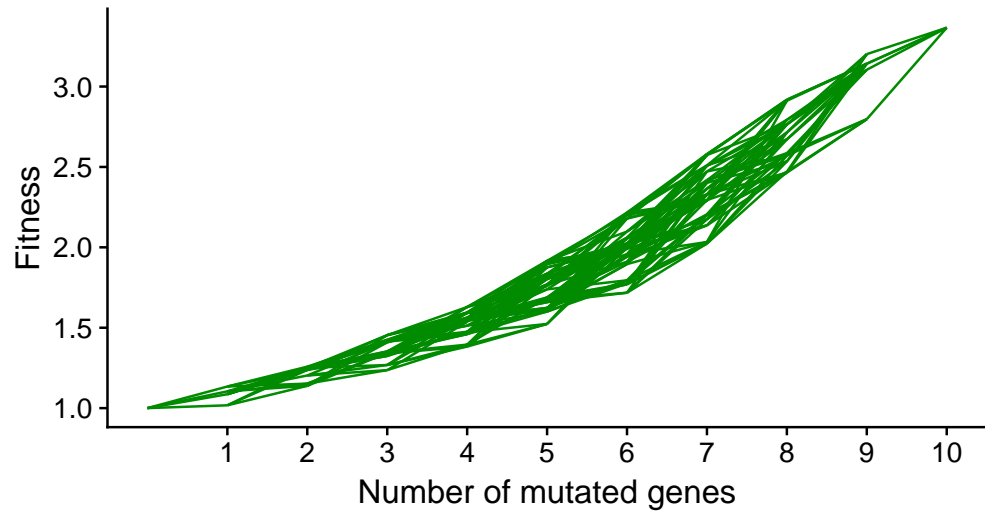



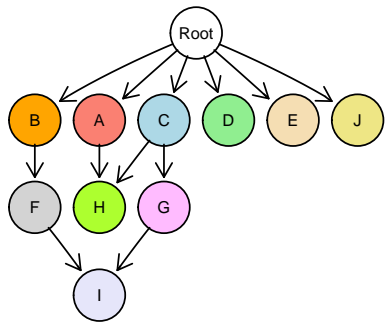

ID PVfJTINJUgHLfOjP  
 acc genotypes 216  
 peaks no back 1  
 removed edges 0  
 prop rem edges 0

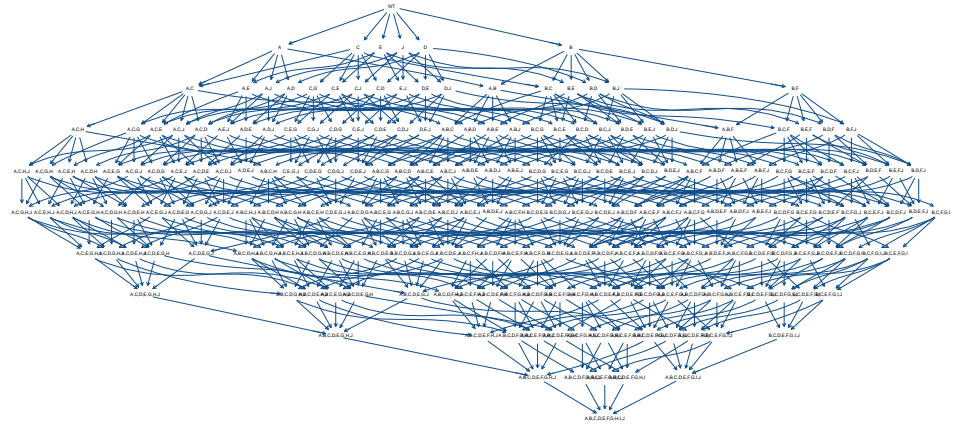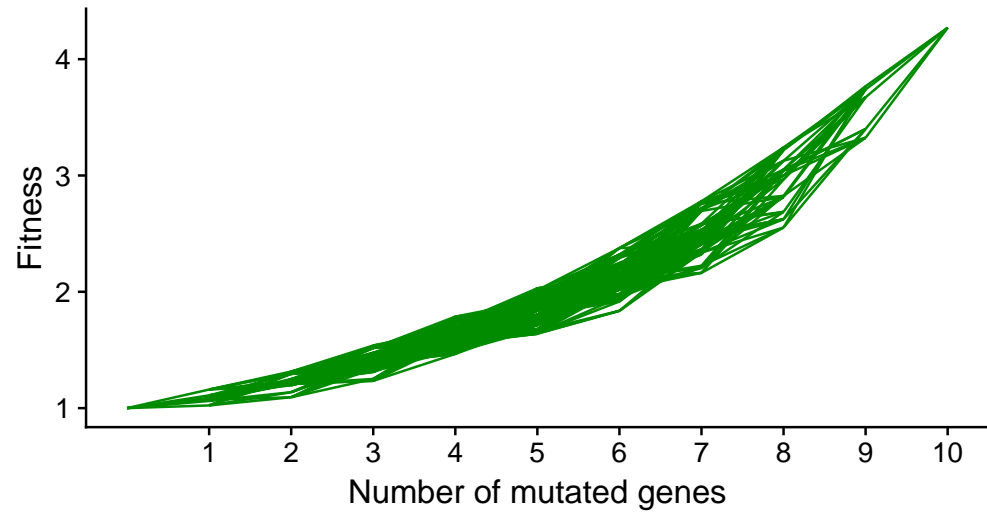

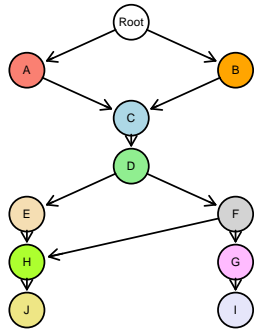

ID [pwyaa7tk7LZumPR](#)  
 acc genotypes 19  
 peaks no back 1  
 removed edges 0  
 prop rem edges 0

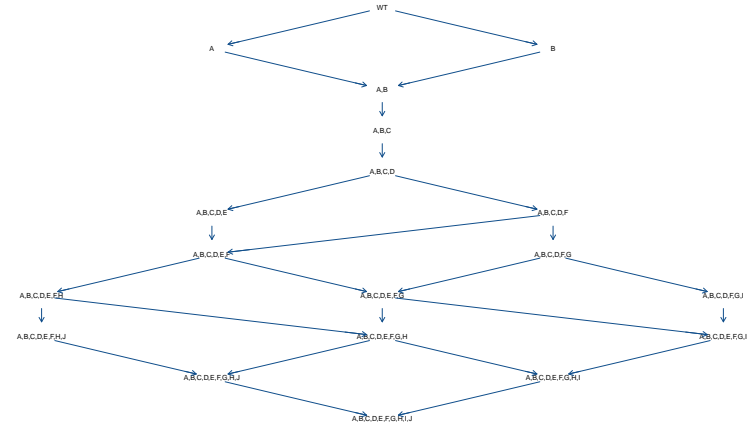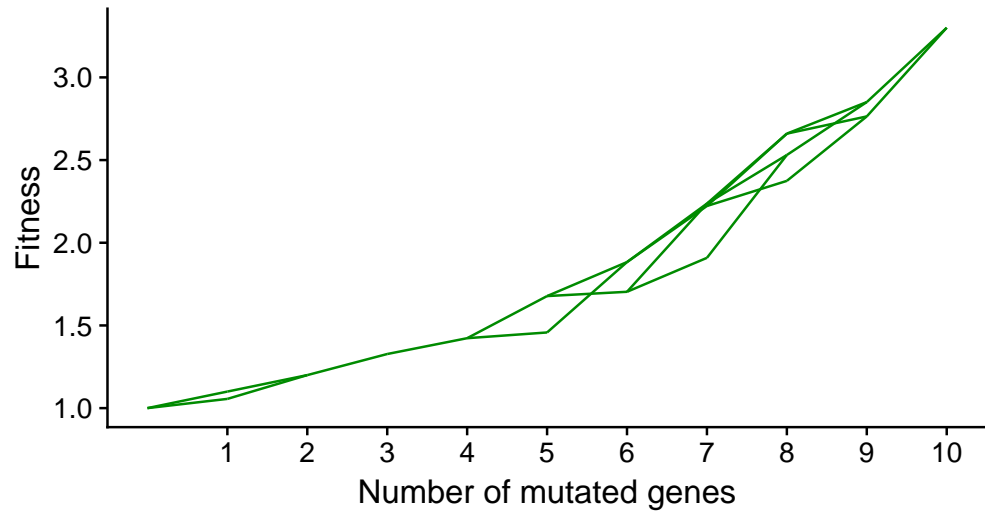



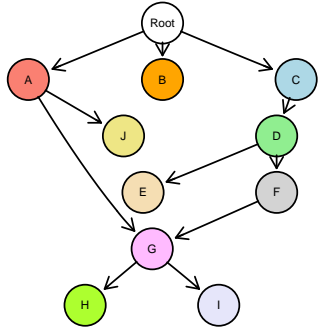

ID **QGRVIBiM3bkC395C**  
 acc genotypes **68**  
 peaks no back 1  
 removed edges 0  
 prop rem edges 0

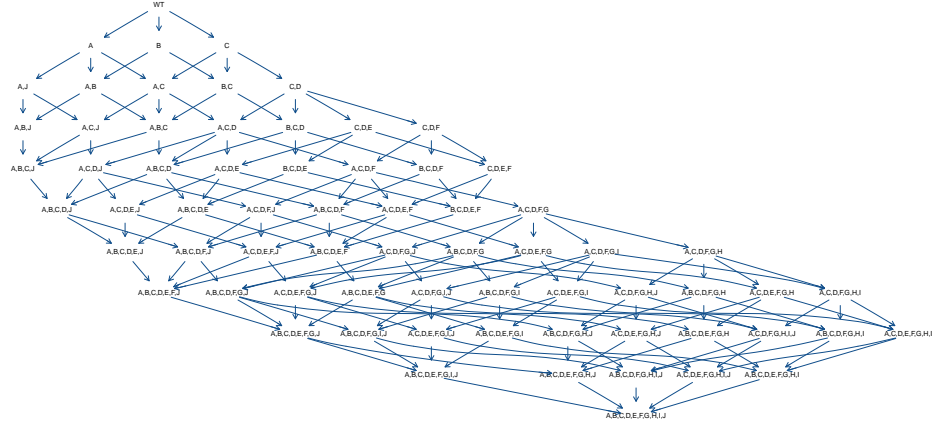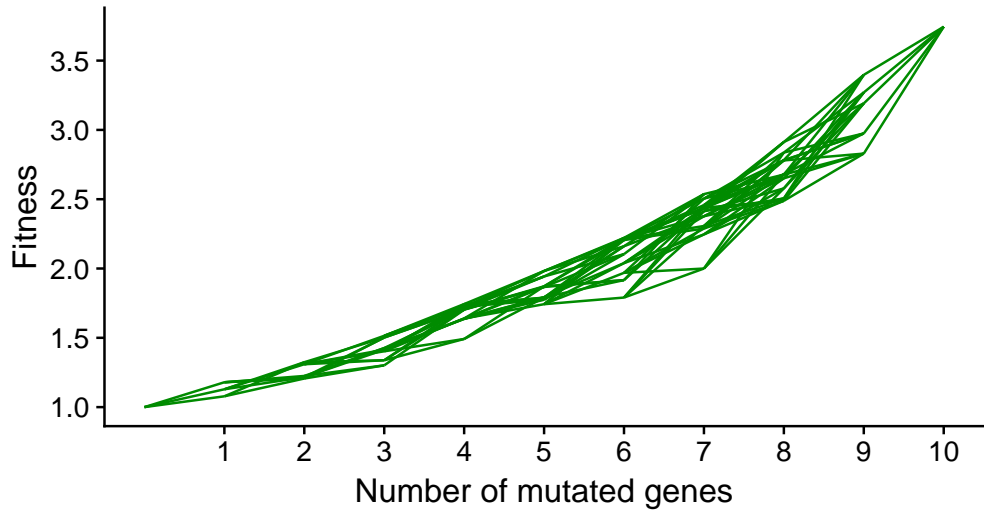

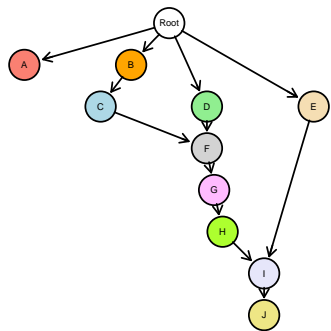

ID [Qt7h8PhrOcDVjbUJ](#)  
 acc genotypes 40  
 peaks no back 1  
 removed edges 0  
 prop rem edges 0

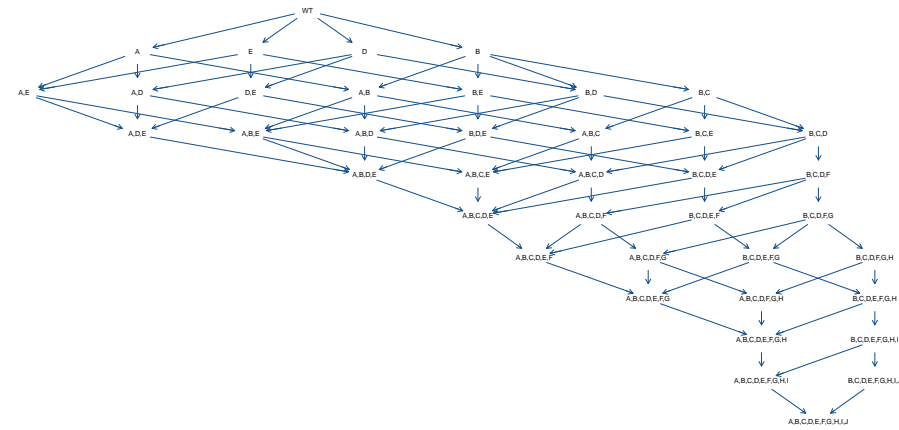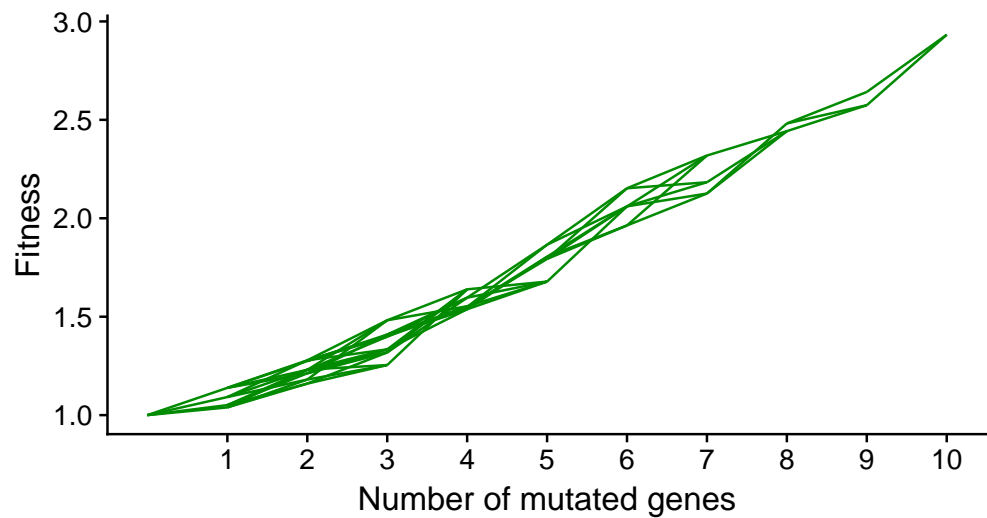

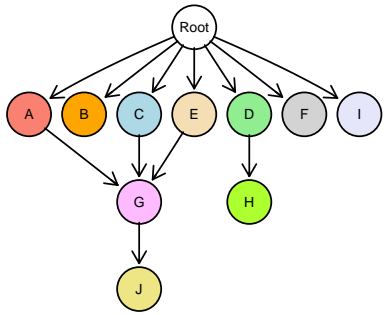

ID Rgqj10zX3omumQ9oh  
 acc genotypes 240  
 peaks no back 1  
 removed edges 0  
 prop rem edges 0

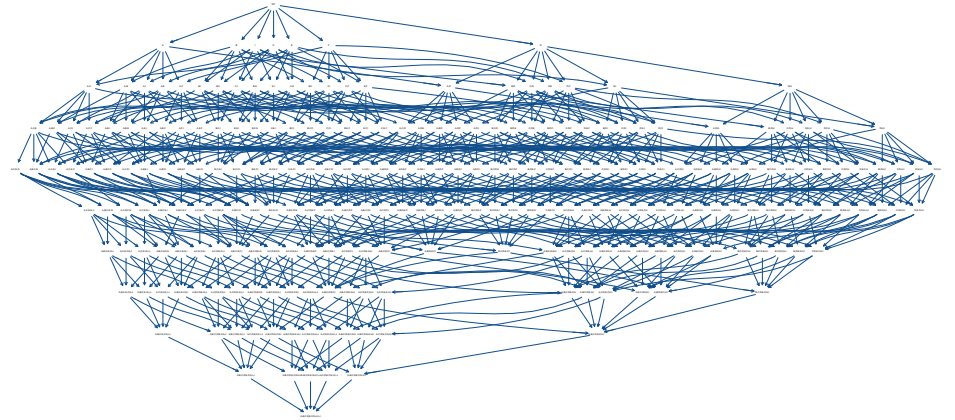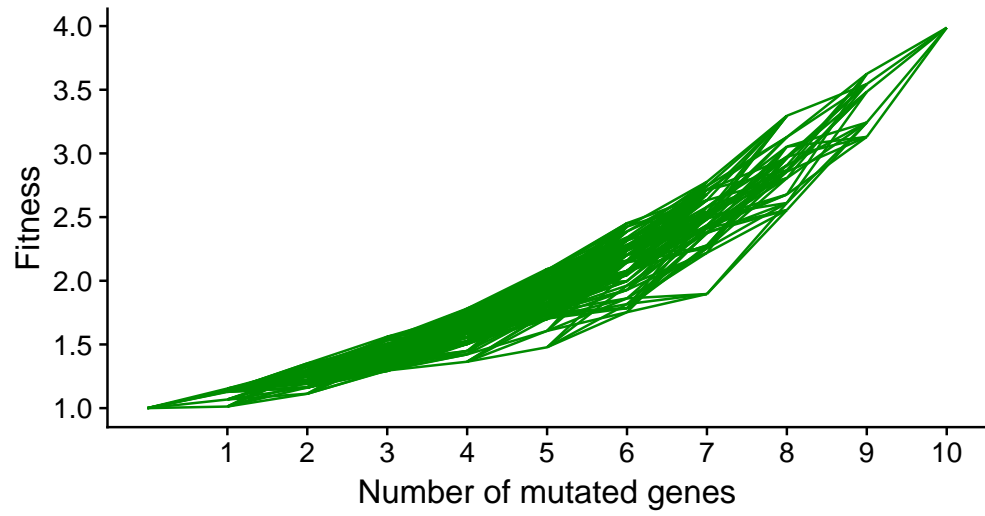

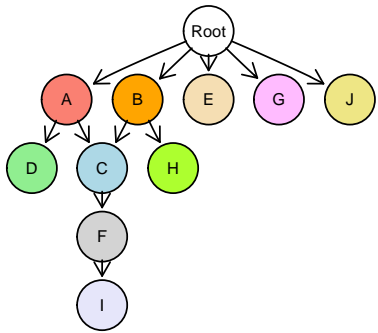

ID **RHdC3iuVYPR6IBD10**  
 acc genotypes **168**  
 peaks no back 1  
 removed edges 0  
 prop rem edges 0

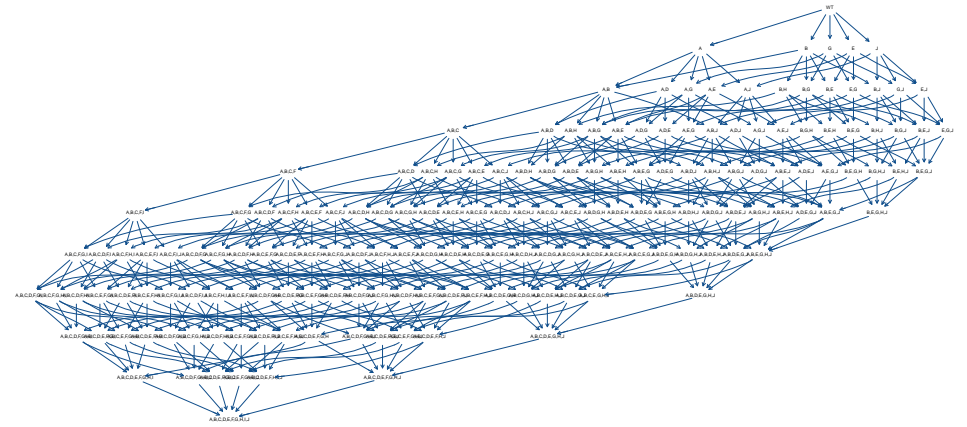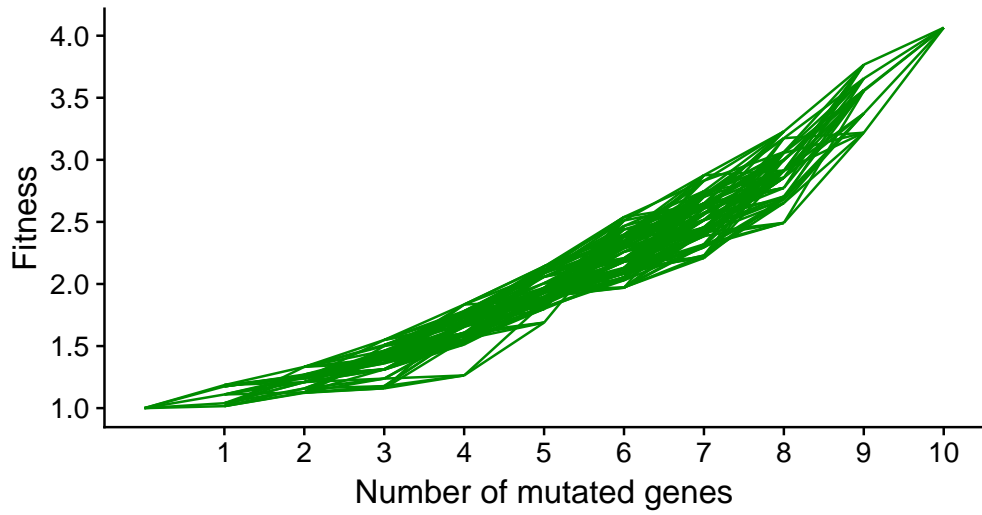

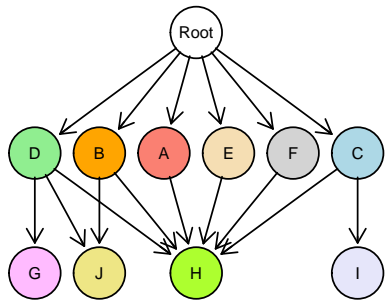

ID RM2aZBkyRpQtZvKY  
 acc genotypes 200  
 peaks no back 1  
 removed edges 0  
 prop rem edges 0

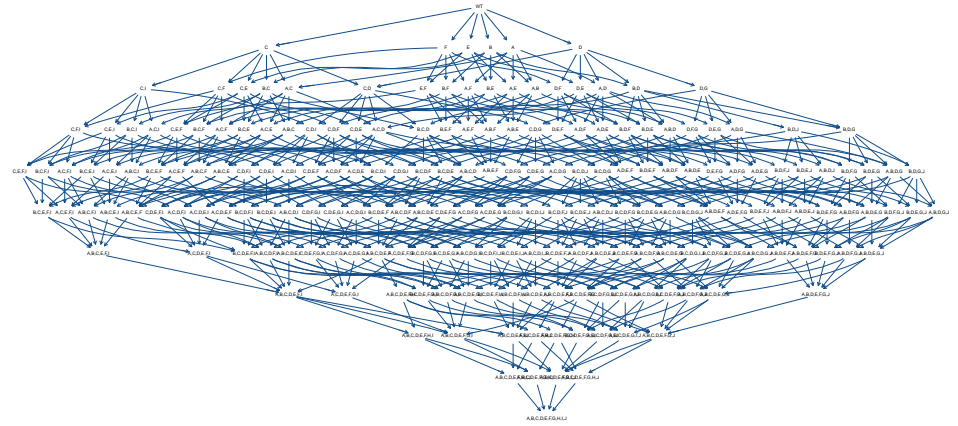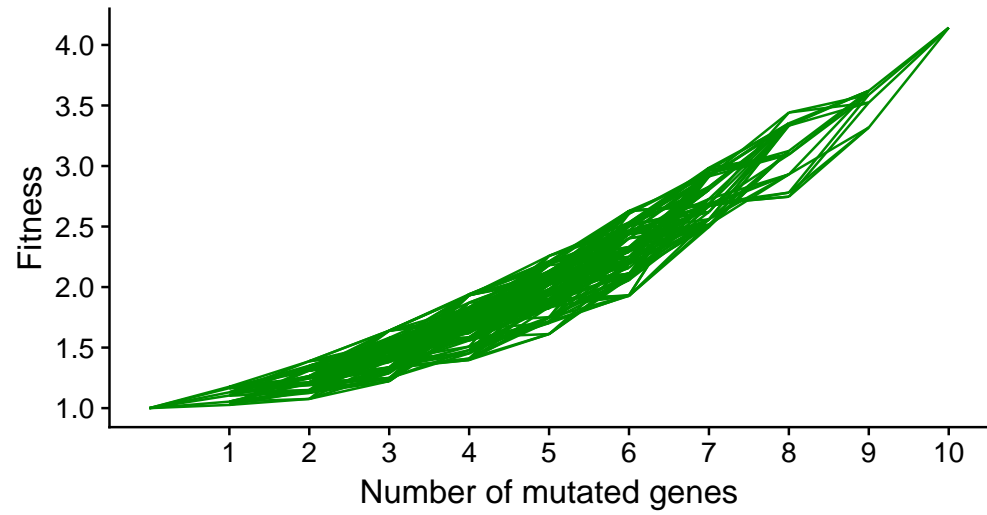





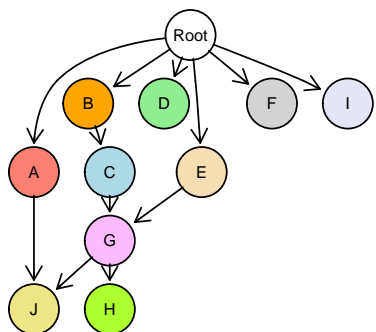

ID rRVesv4UIXP10d31k  
 acc genotypes 144  
 peaks no back 1  
 removed edges 0  
 prop rem edges 0

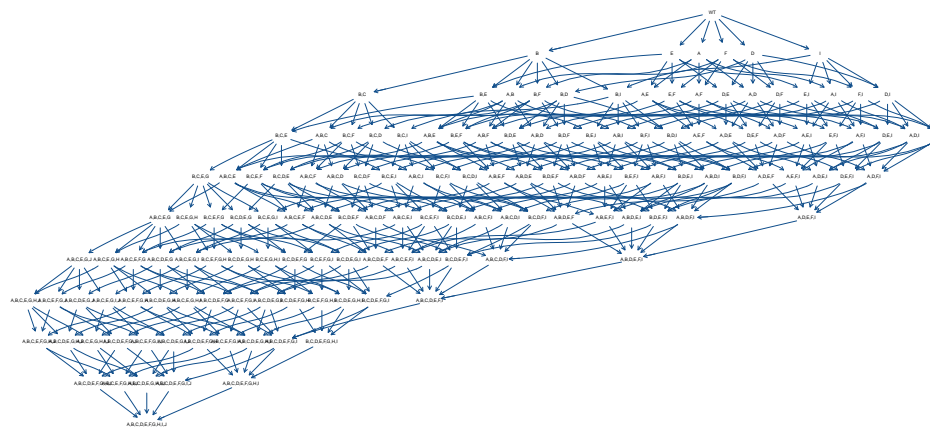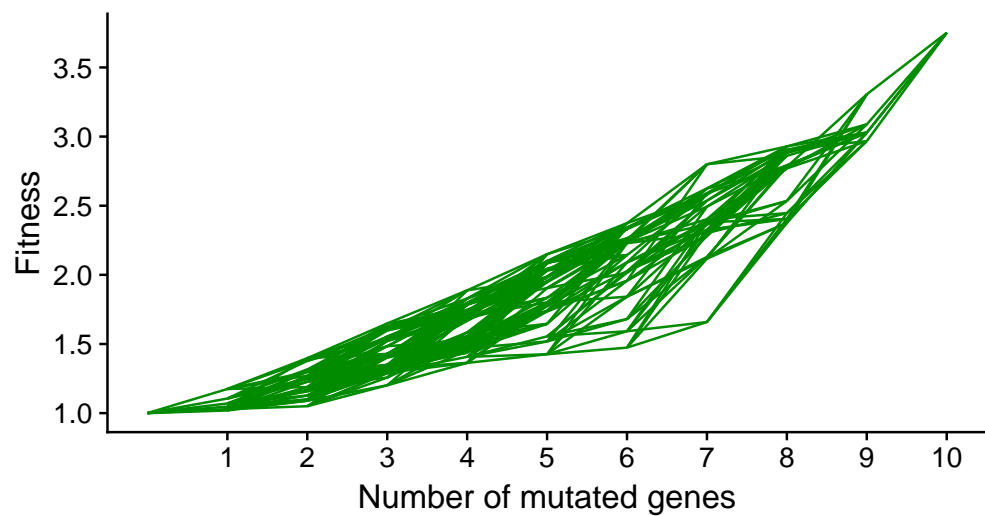

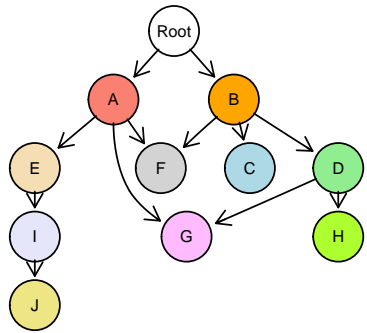

ID **rsk7tlpjfEVKOLgb**  
 acc genotypes **91**  
 peaks no back **1**  
 removed edges **0**  
 prop rem edges **0**

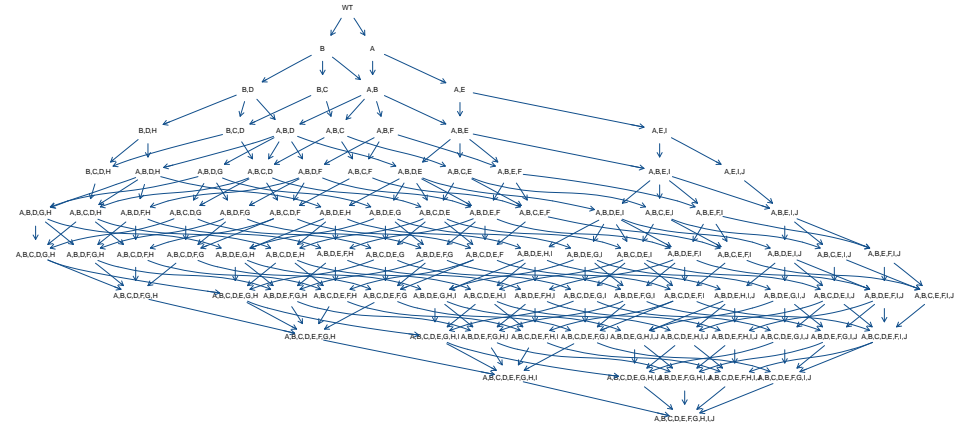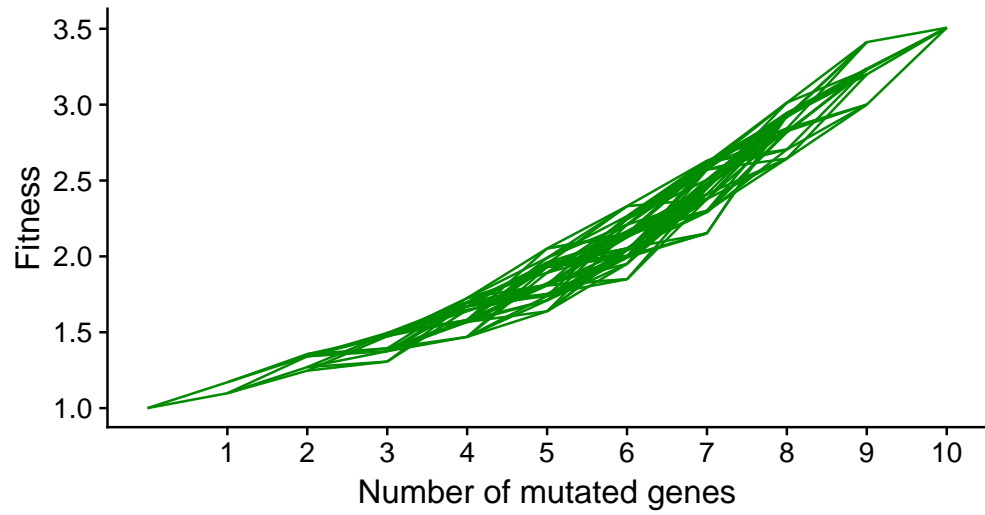

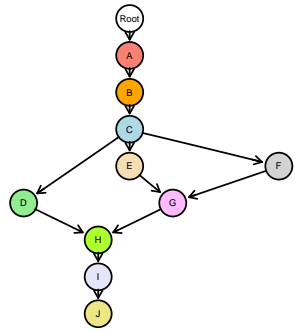

ID **rXEM4KMif4W386fC**  
 acc genotypes **16**  
 peaks no back 1  
 removed edges 0  
 prop rem edges 0

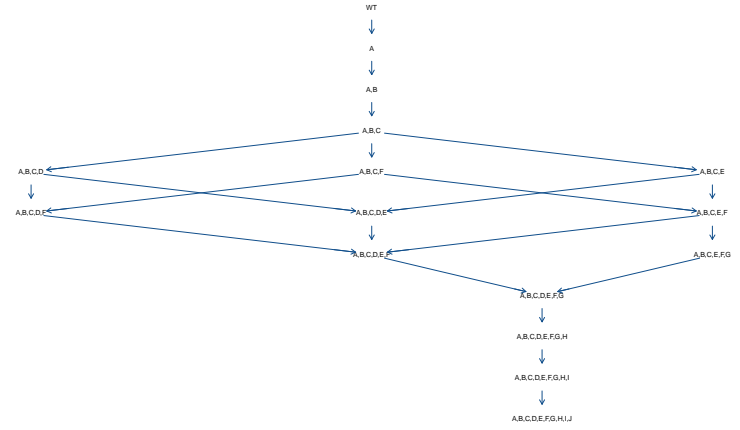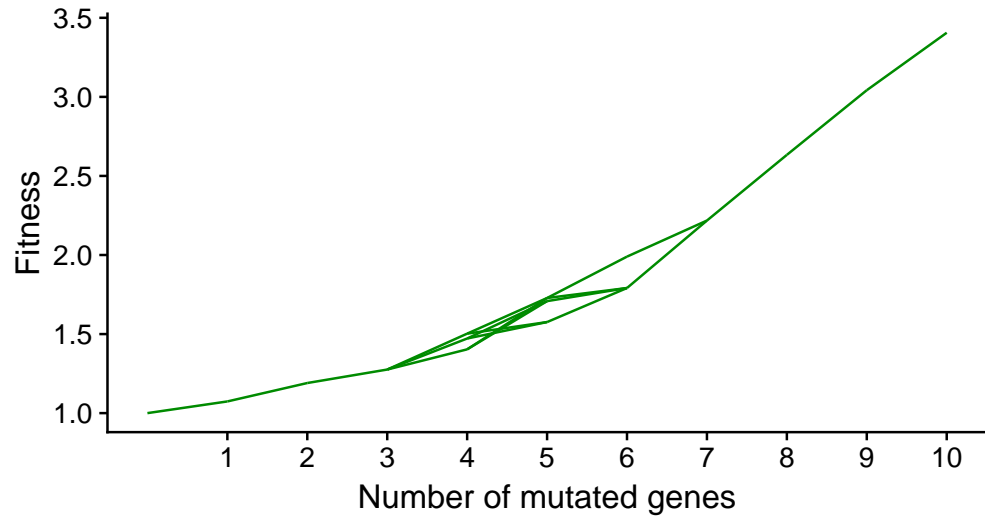

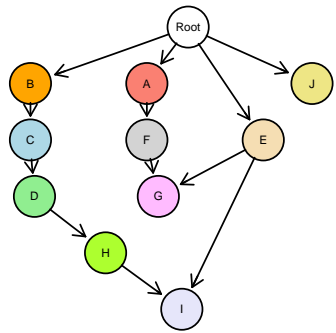

ID **rZYDGyZC7mmbrvG7**  
 acc genotypes **78**  
 peaks no back 1  
 removed edges 0  
 prop rem edges 0

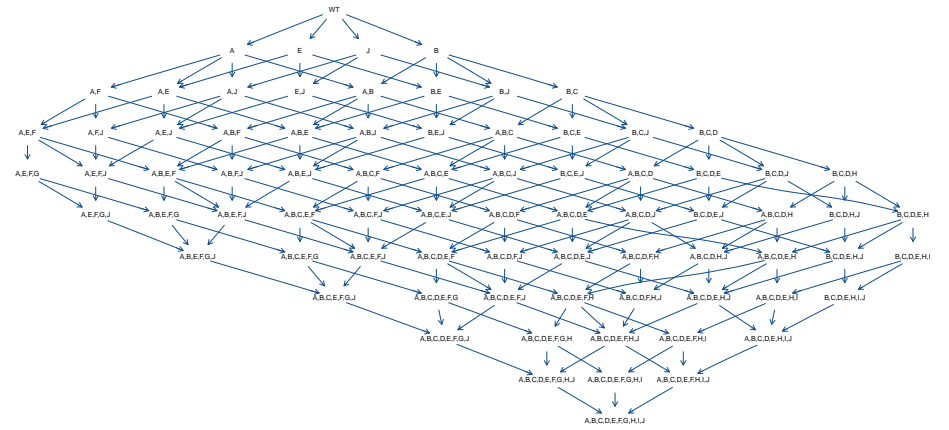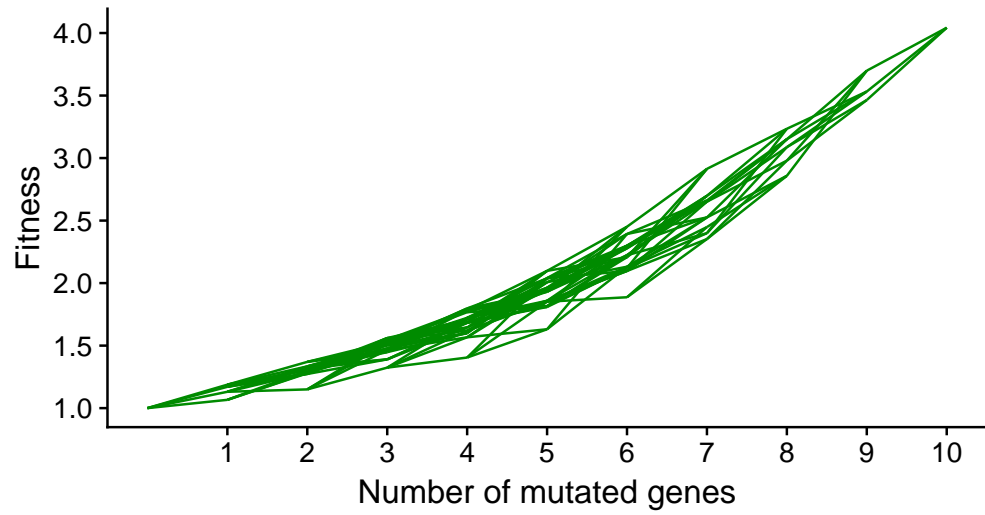

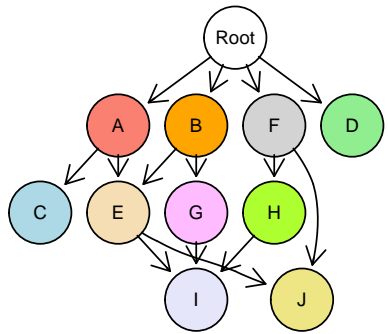

ID [sH934jpdq110yYeSf](#)  
 acc genotypes 102  
 peaks no back 1  
 removed edges 0  
 prop rem edges 0

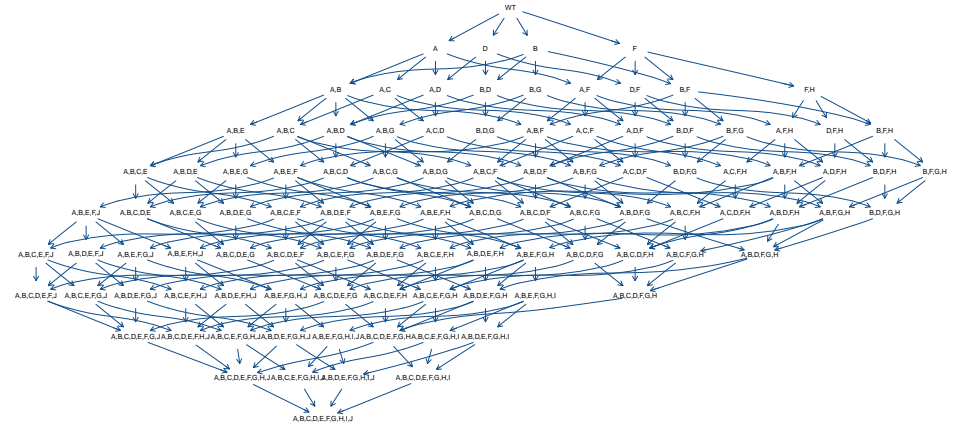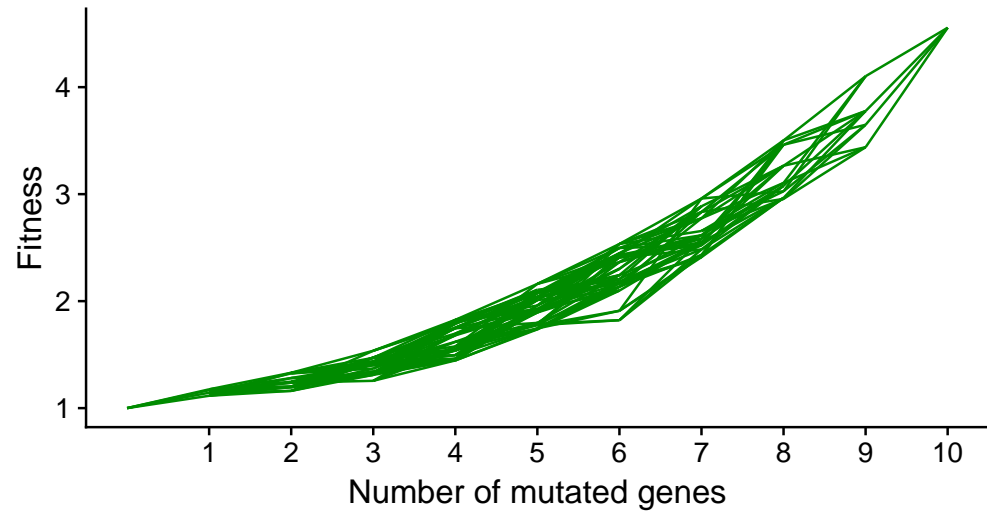

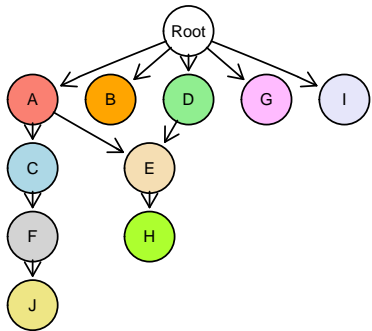

ID **sisQewhG7QPpthsD**  
 acc genotypes **144**  
 peaks no back 1  
 removed edges 0  
 prop rem edges 0

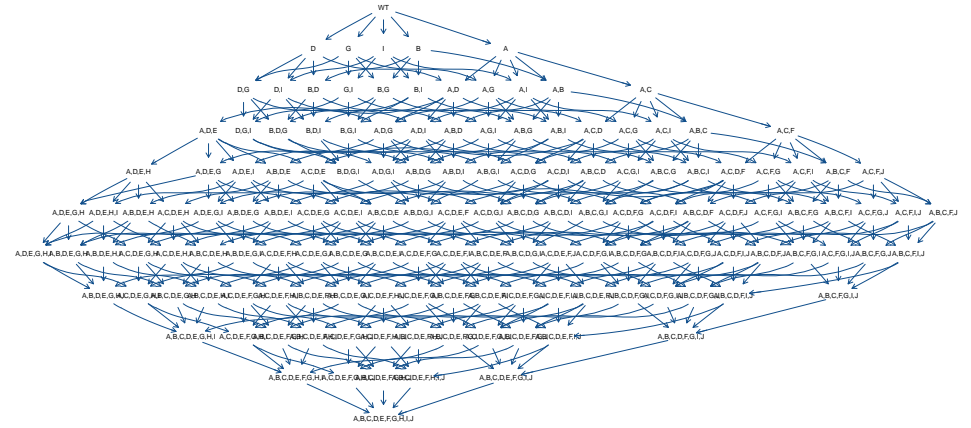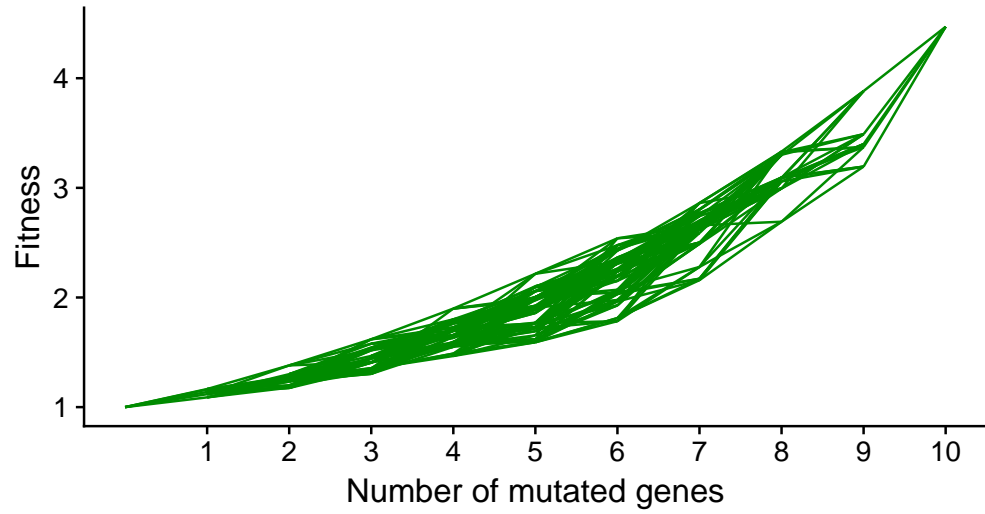

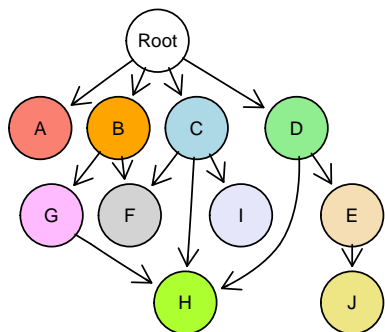

ID **sNgShm95dIStotH4**  
 acc genotypes **128**  
 peaks no back 1  
 removed edges 0  
 prop rem edges 0

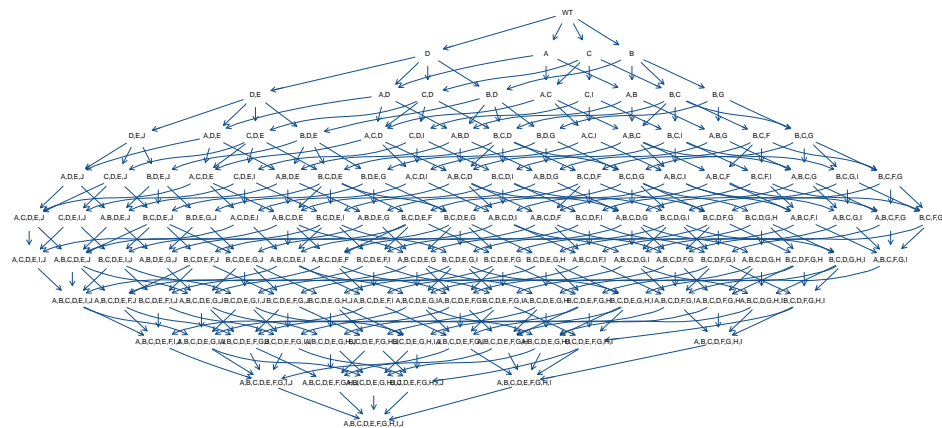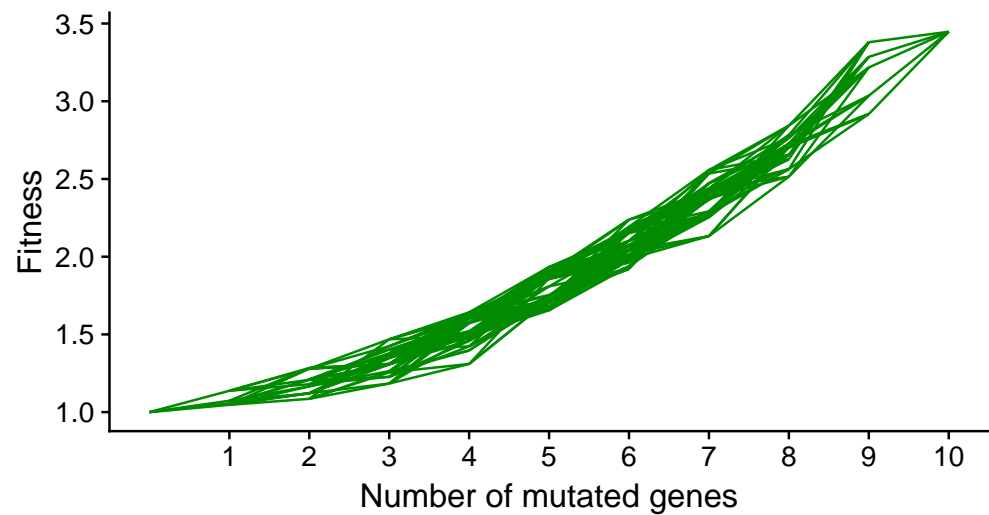



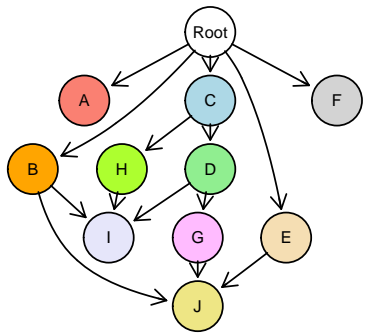

ID **sQiN7joZyxfMKsXn**  
 acc genotypes **140**  
 peaks no back 1  
 removed edges 0  
 prop rem edges 0

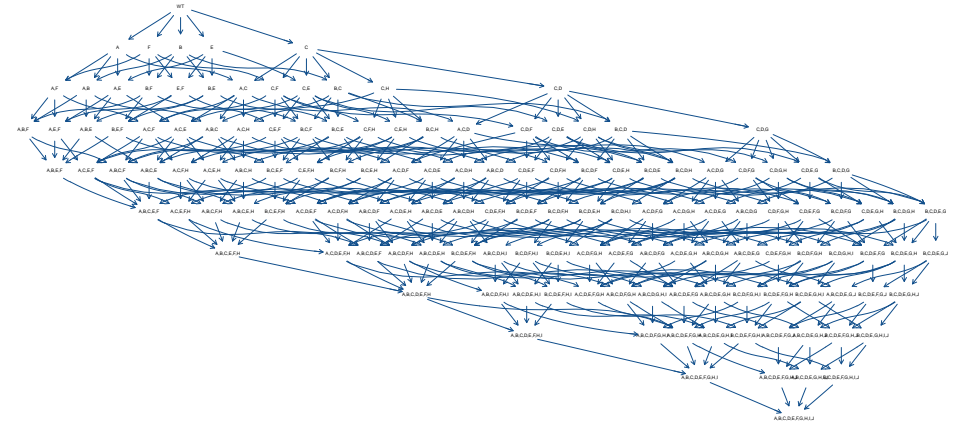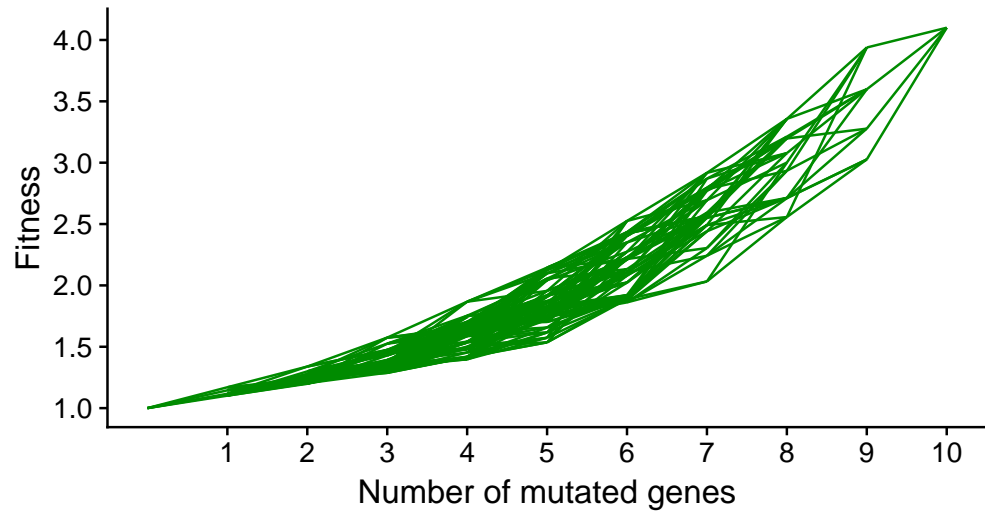

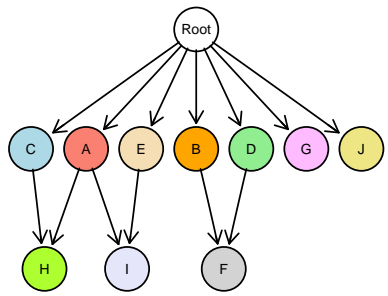

*ID* sUfgZw6OOPt5SCir  
*acc genotypes* 260  
*peaks no back* 1  
*removed edges* 0  
*prop rem edges* 0

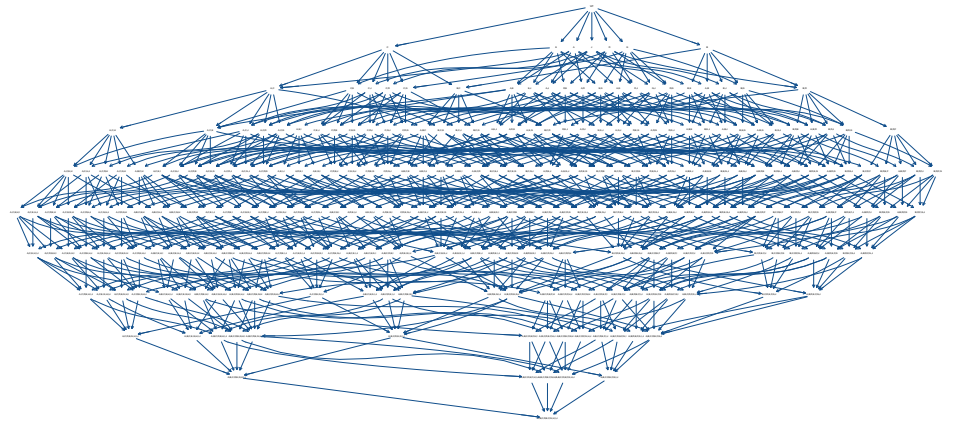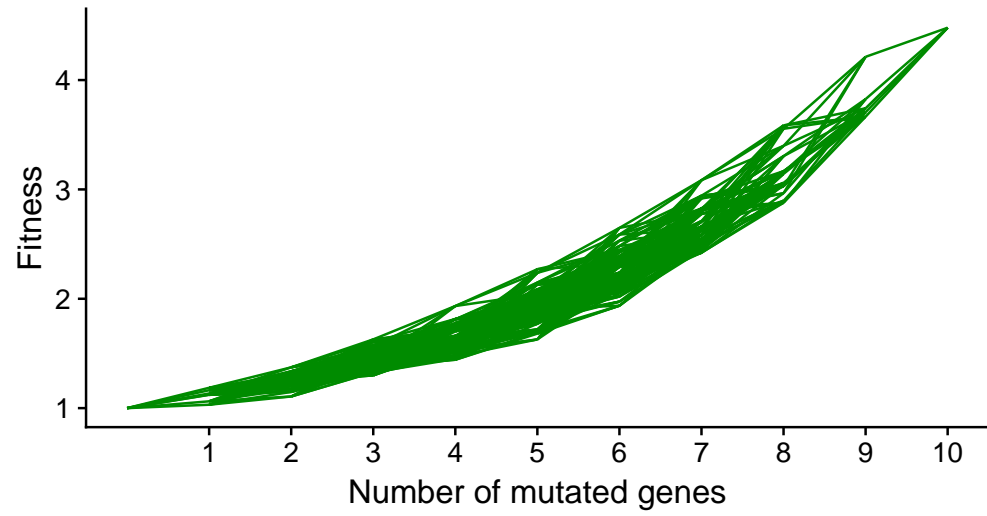

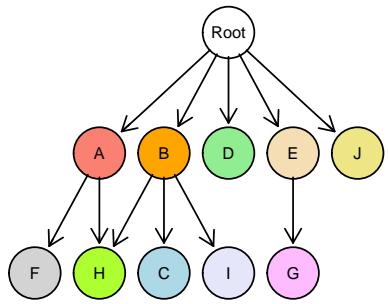

*ID* svUNVWKM4yHG4ZG6  
*acc genotypes* 276  
*peaks no back* 1  
*removed edges* 0  
*prop rem edges* 0

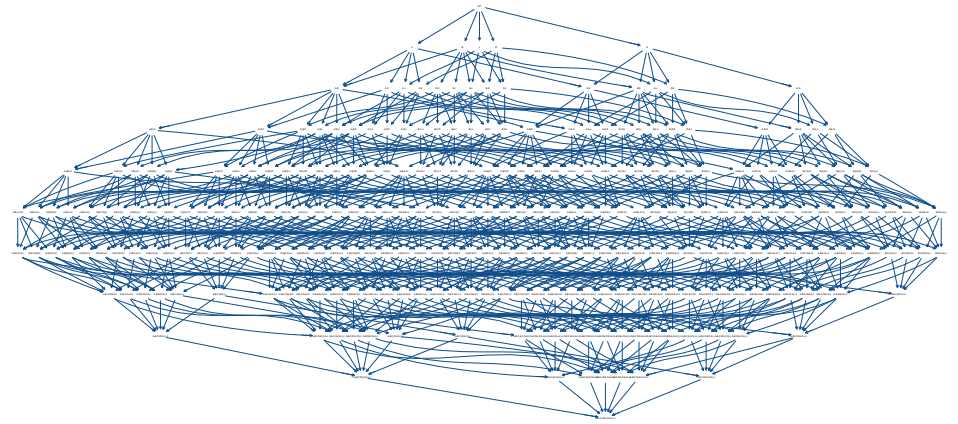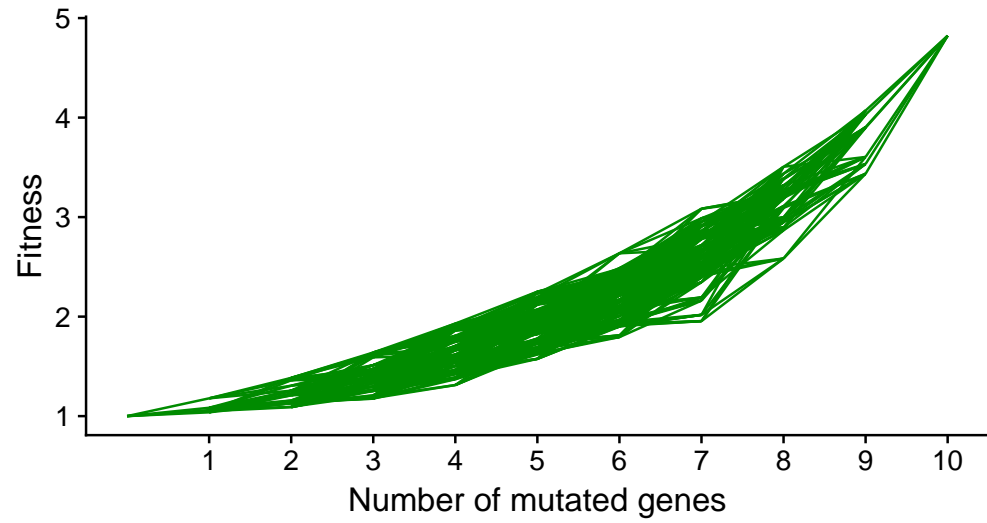

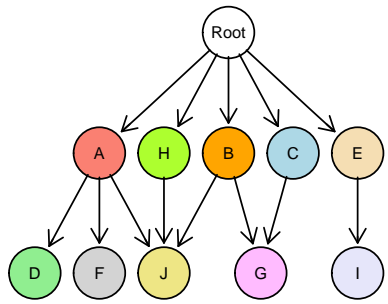

ID **tbhoAhVYmdTD8tmZ**  
 acc genotypes **186**  
 peaks no back 1  
 removed edges 0  
 prop rem edges 0

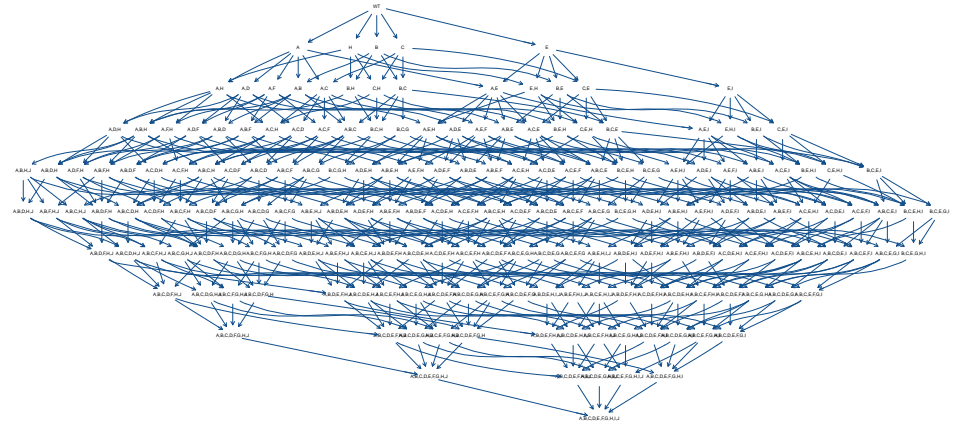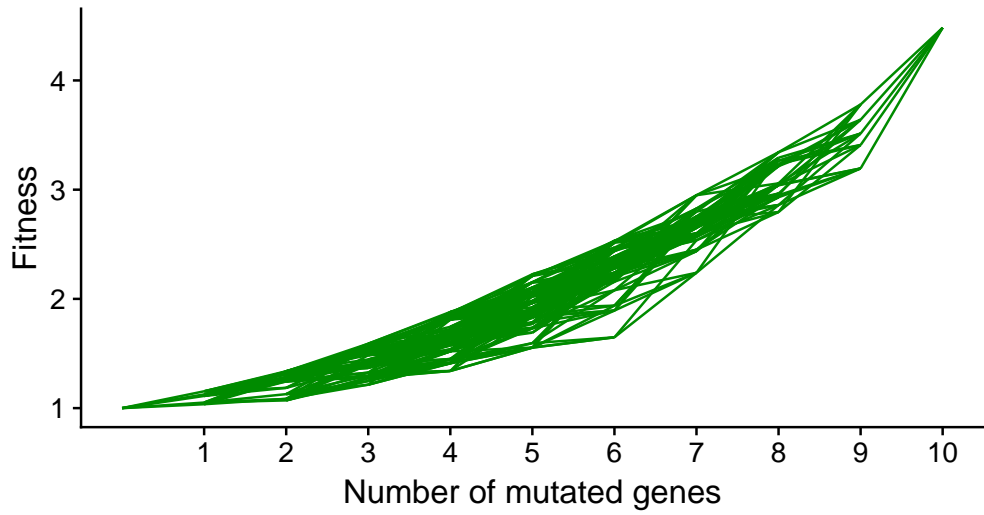

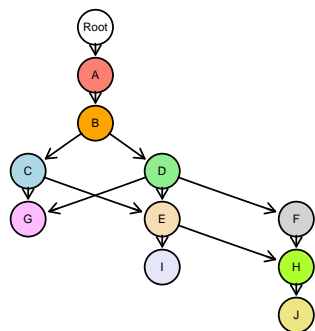

ID TFxs2KpM5WO9Abi10  
 acc genotypes 26  
 peaks no back 1  
 removed edges 0  
 prop rem edges 0

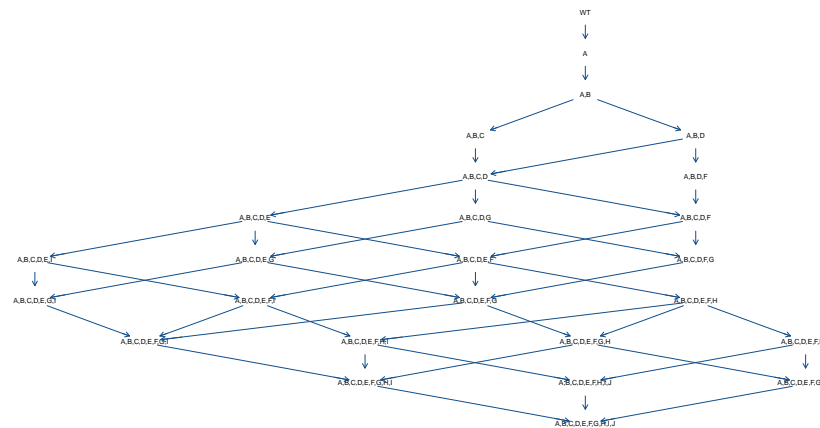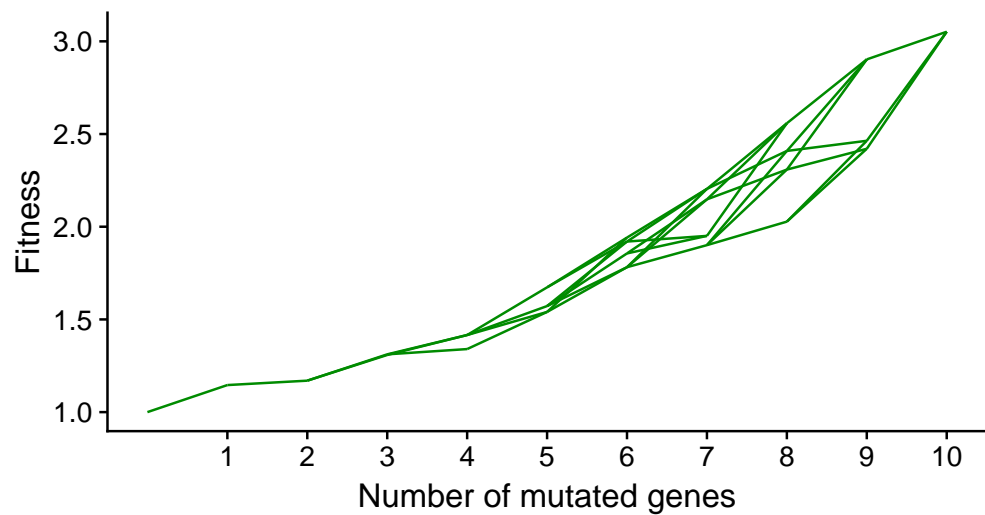

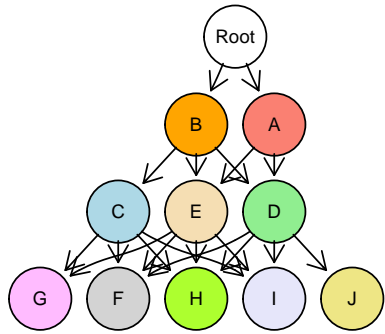

ID TH4wayDxtpPQJ3zV  
 acc genotypes 47  
 peaks no back 1  
 removed edges 0  
 prop rem edges 0

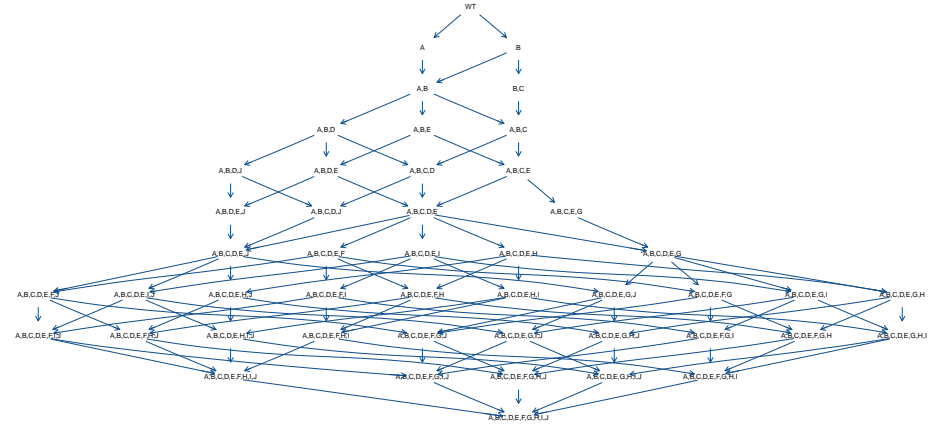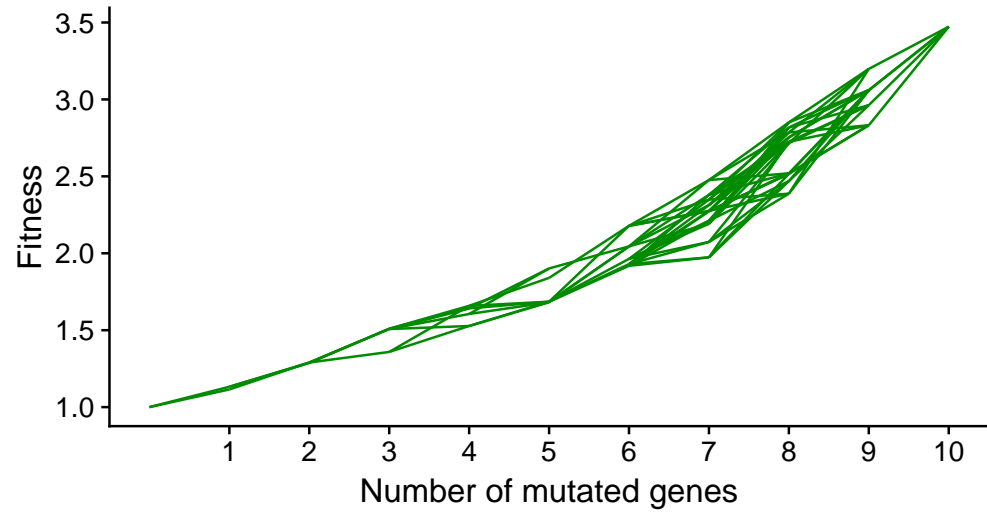

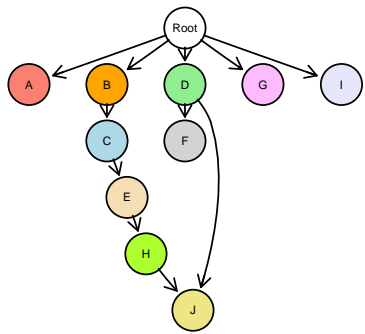

ID **t17D6tCILmHkt9fG**  
 acc genotypes **136**  
 peaks no back 1  
 removed edges 0  
 prop rem edges 0

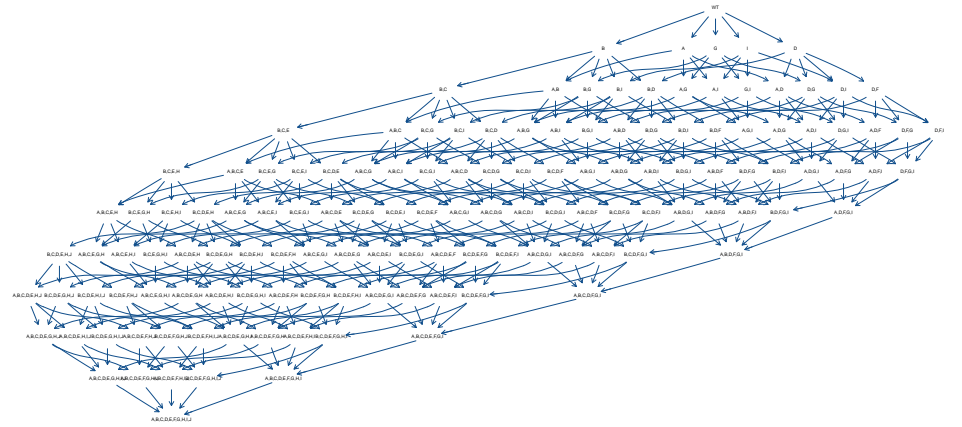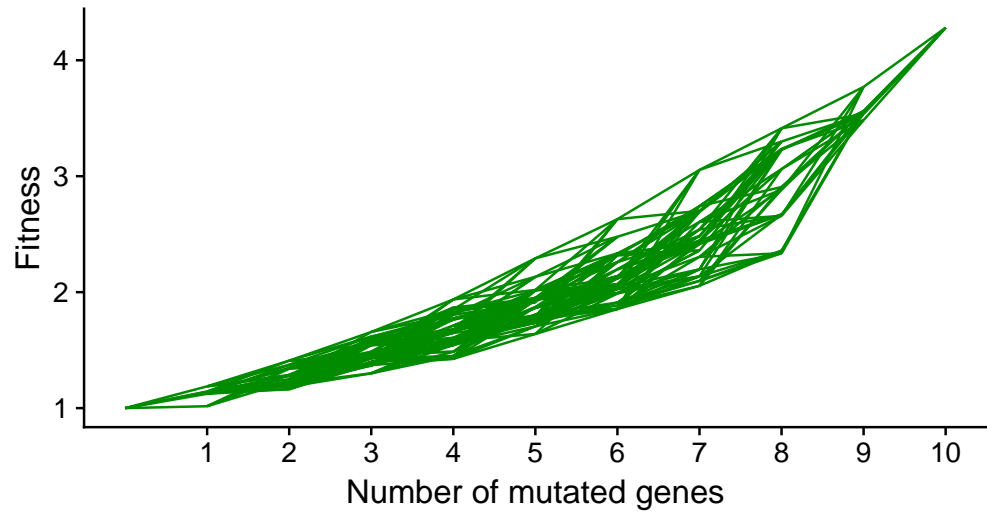

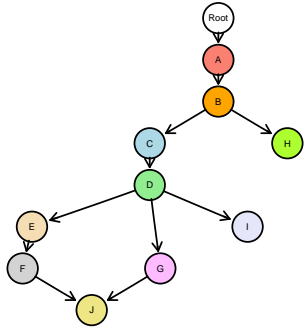

ID [tq7jgfG17AM4lqGW](#)  
 acc genotypes 34  
 peaks no back 1  
 removed edges 0  
 prop rem edges 0

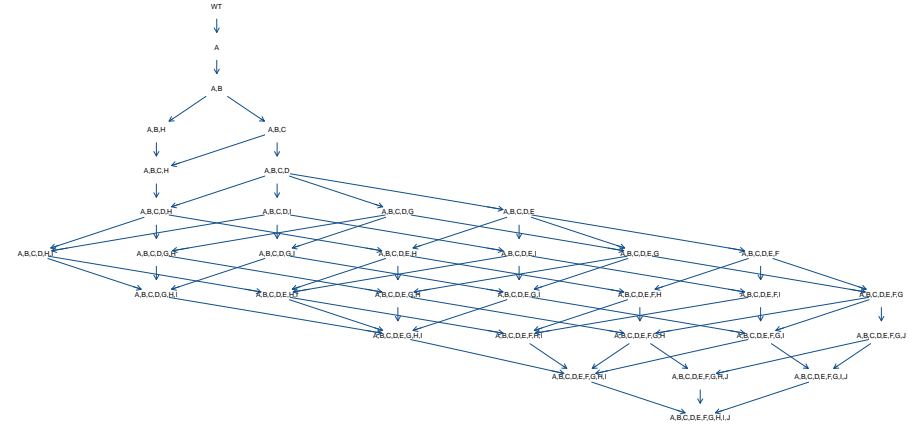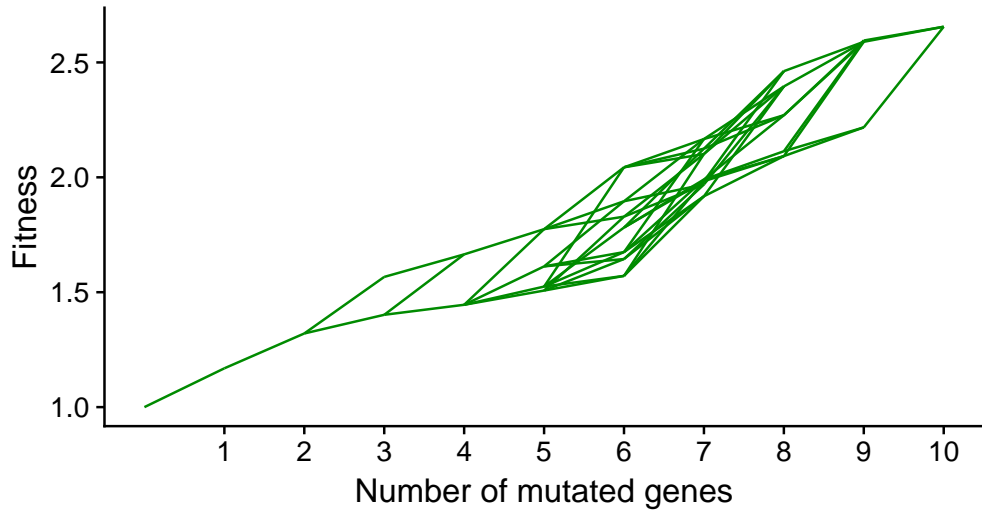



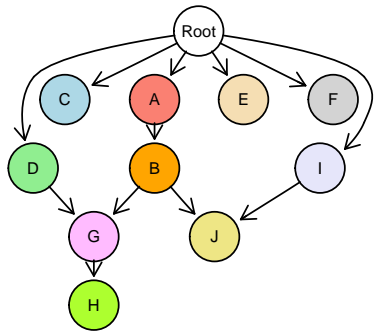

ID TVJsMGLUm85XS67g  
 acc genotypes 160  
 peaks no back 1  
 removed edges 0  
 prop rem edges 0

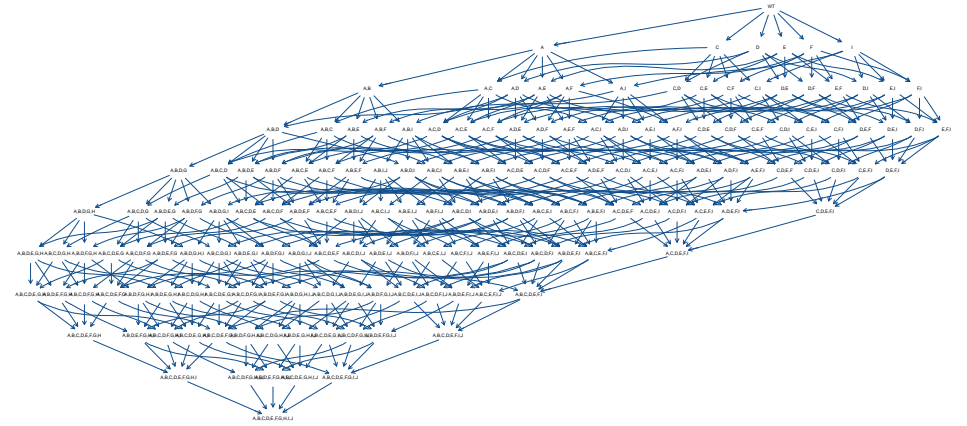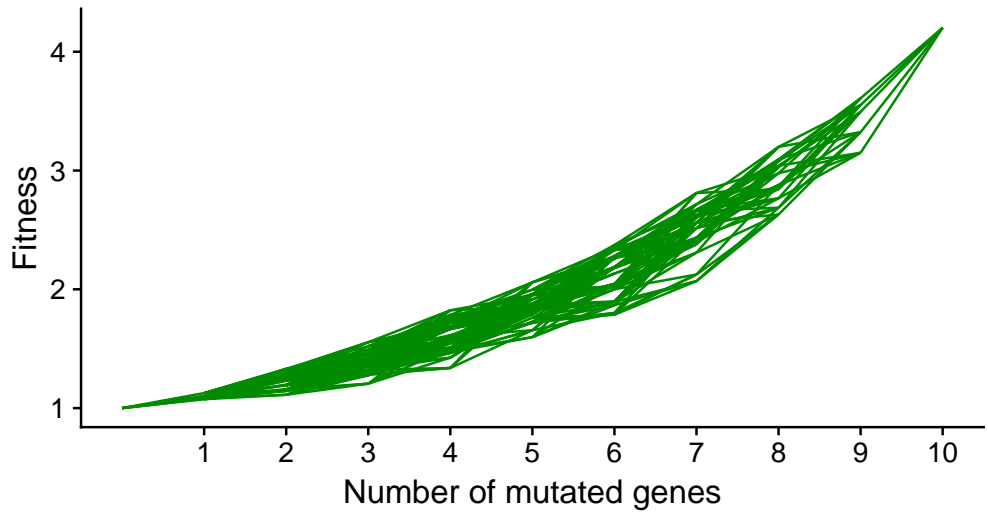

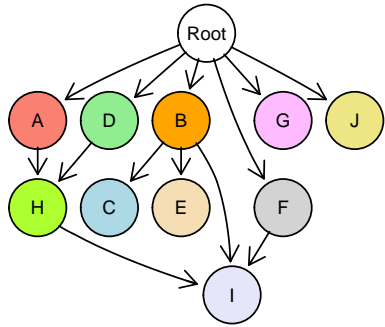

ID TXSYGzI7gHRqH7B  
 acc genotypes 216  
 peaks no back 1  
 removed edges 0  
 prop rem edges 0

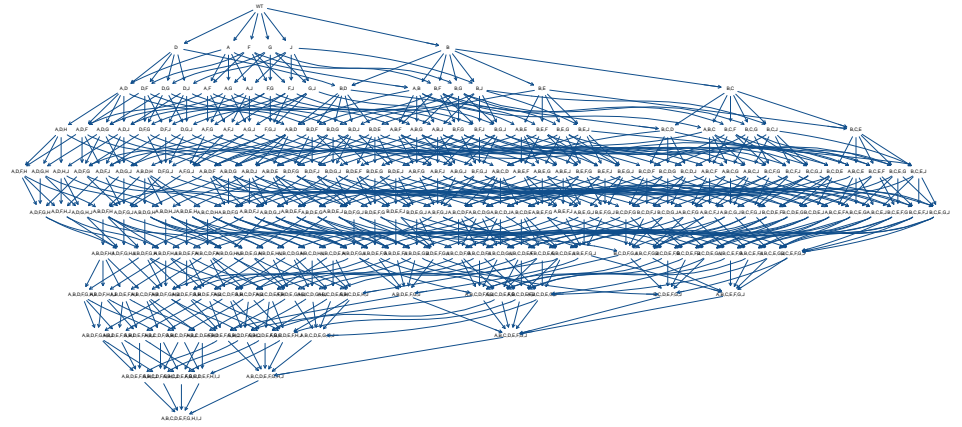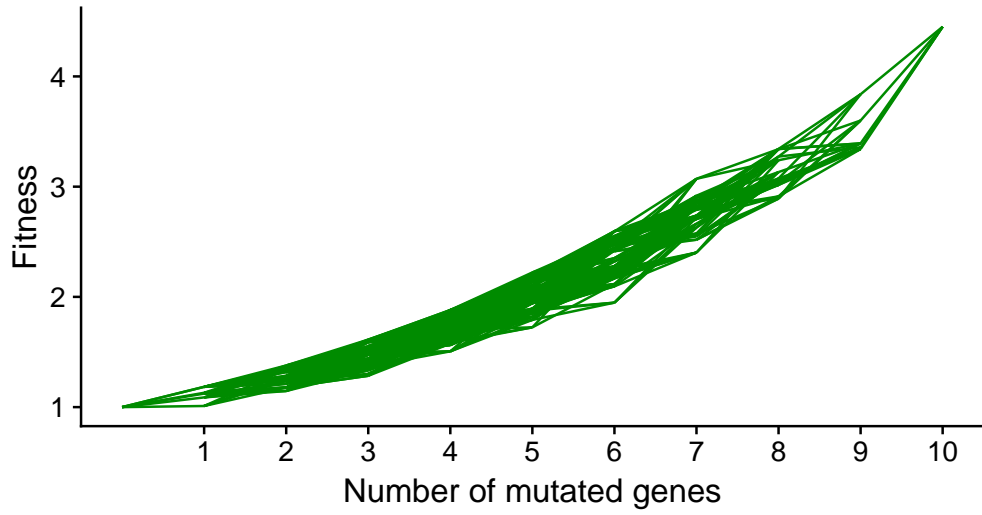

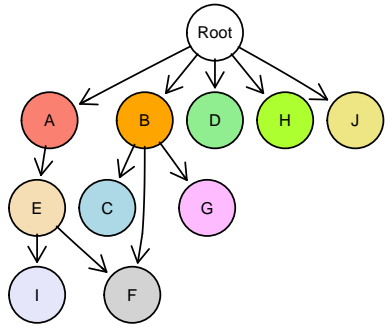

ID u1PuIFhBeoVLcUwQ  
 acc genotypes 224  
 peaks no back 1  
 removed edges 0  
 prop rem edges 0

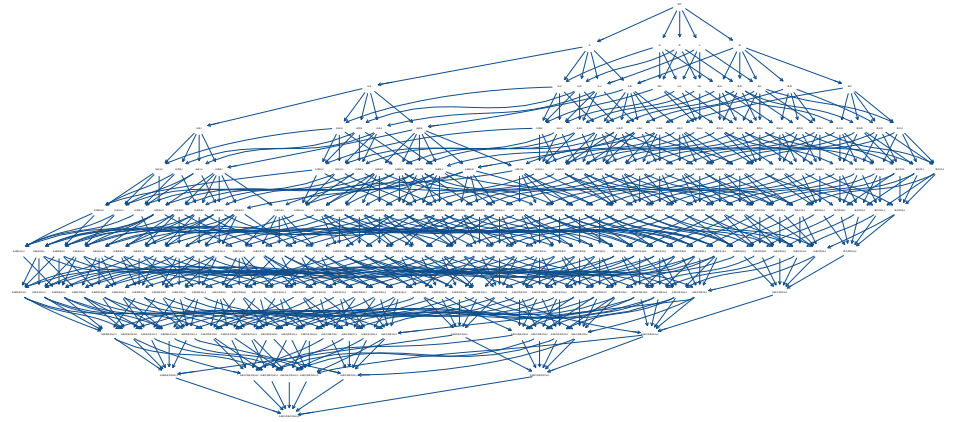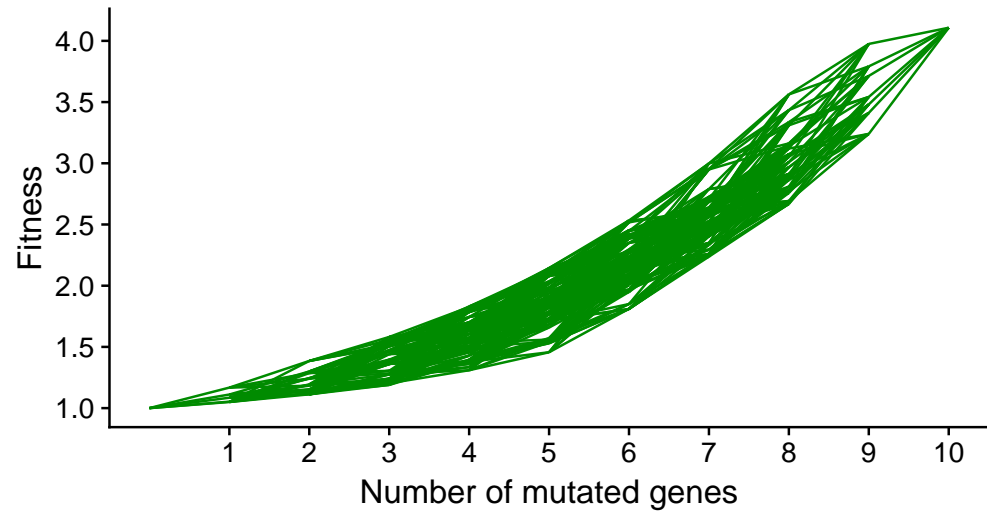

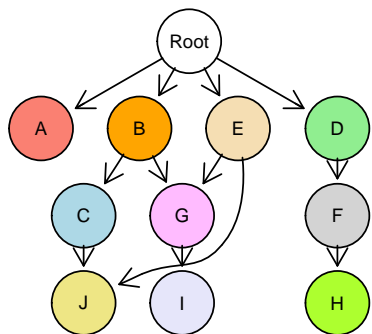

ID [u7NcTlp7H7vgrd6Z](#)  
 acc genotypes 104  
 peaks no back 1  
 removed edges 0  
 prop rem edges 0

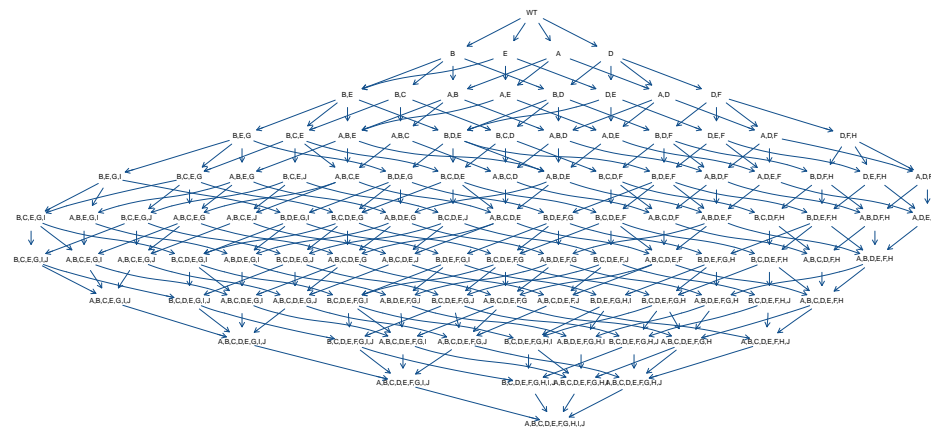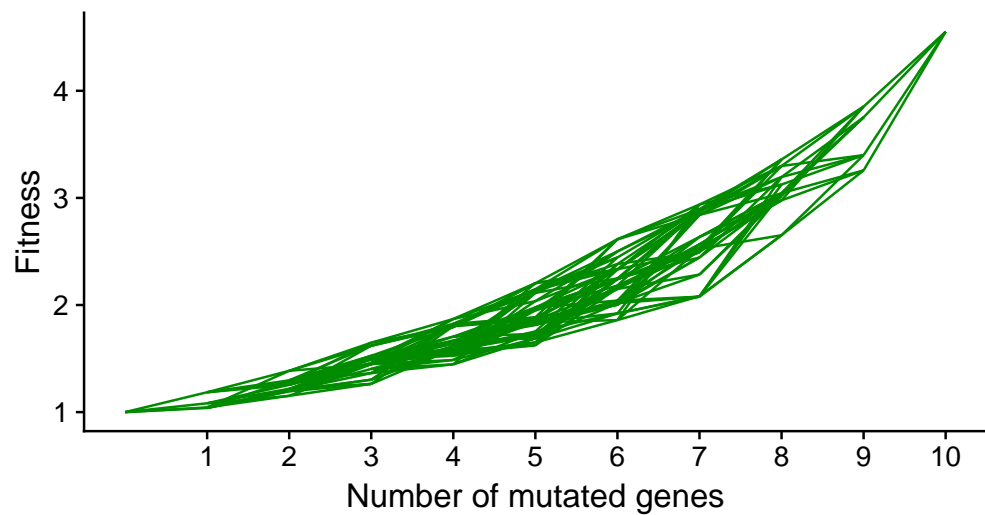

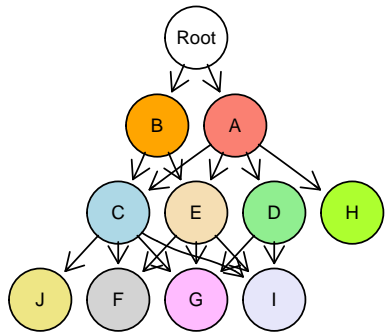

ID [u8LSkOke6emtVQOi](#)  
 acc genotypes 62  
 peaks no back 1  
 removed edges 0  
 prop rem edges 0

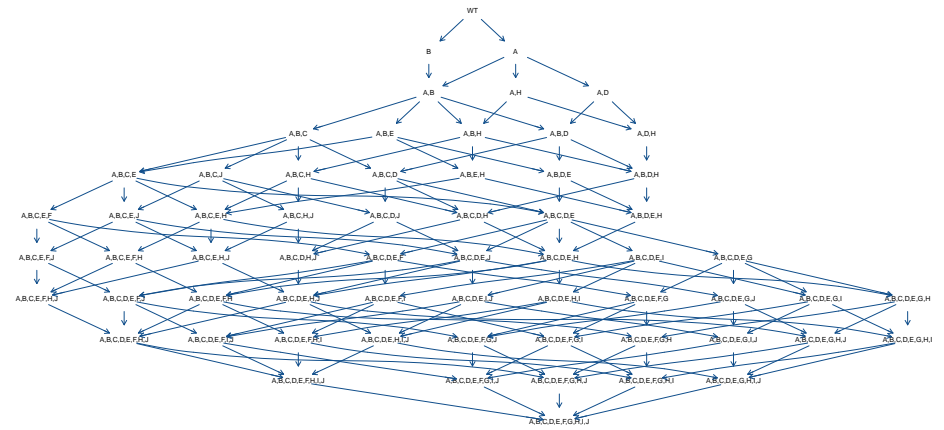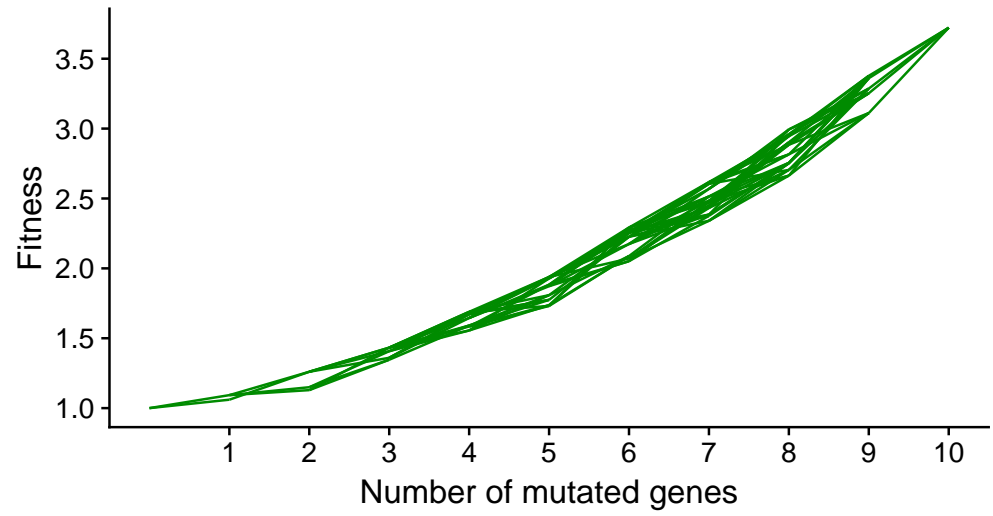

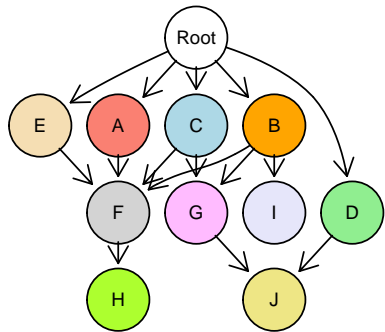

ID **UjXjH4wCYwemR9Ik**  
 acc genotypes **92**  
 peaks no back 1  
 removed edges 0  
 prop rem edges 0

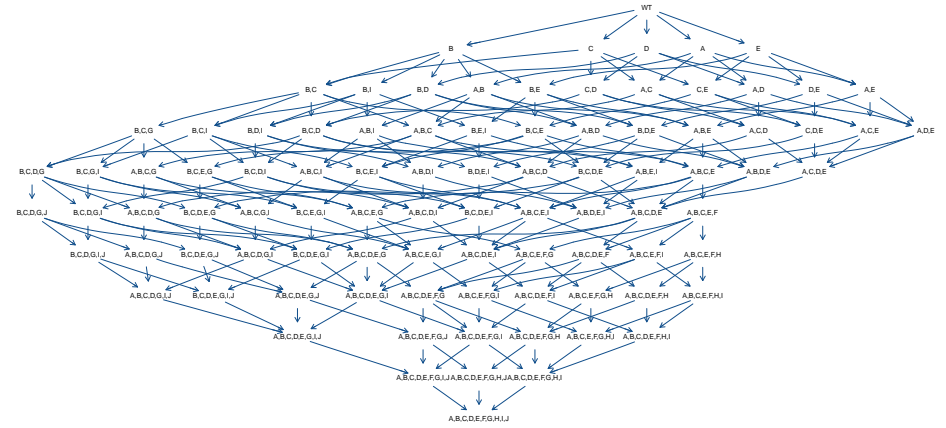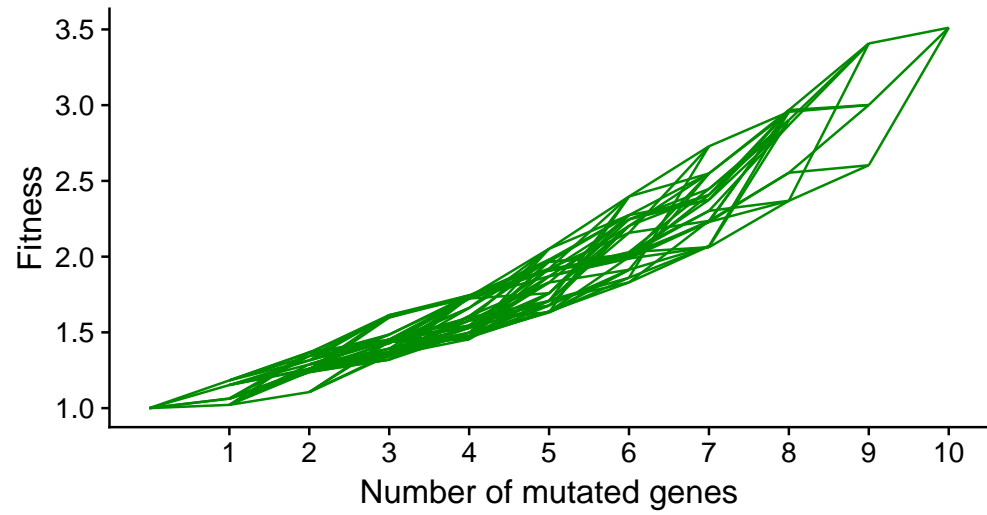

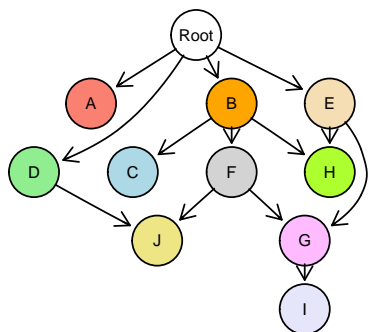

ID UPacqPOLUgev2Qbz  
 acc genotypes 116  
 peaks no back 1  
 removed edges 0  
 prop rem edges 0

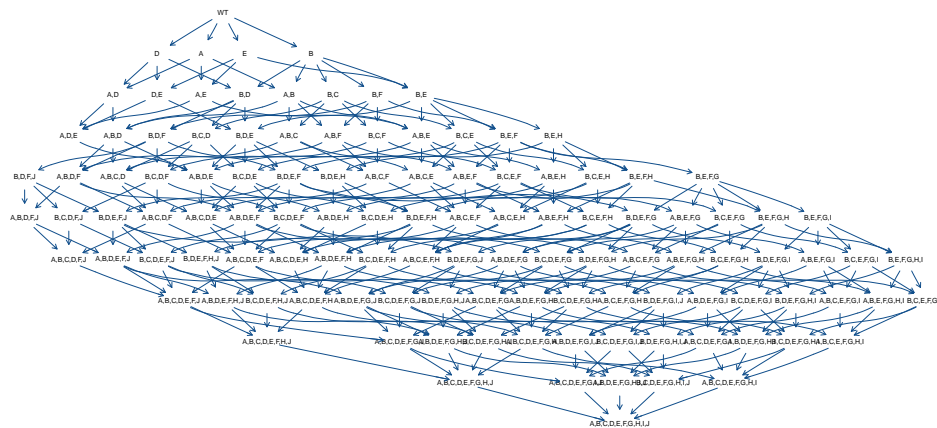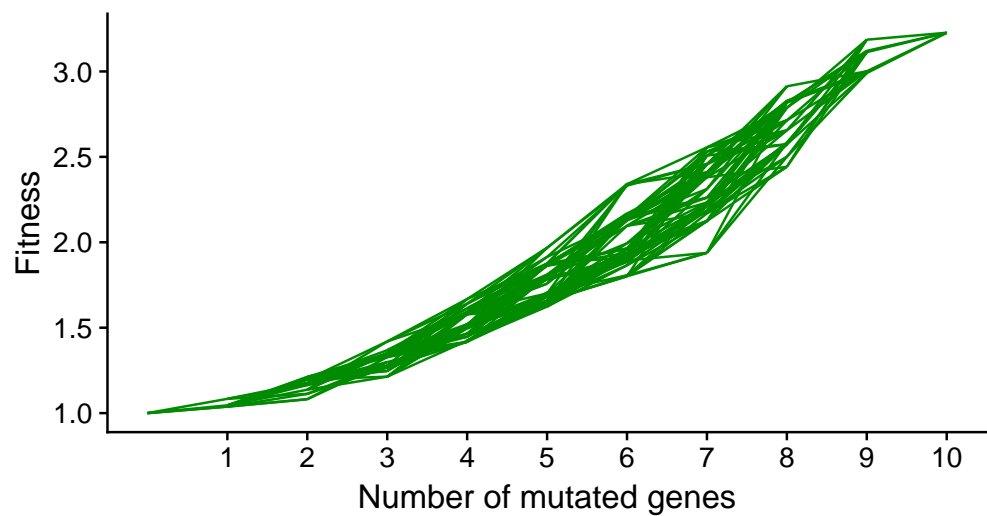

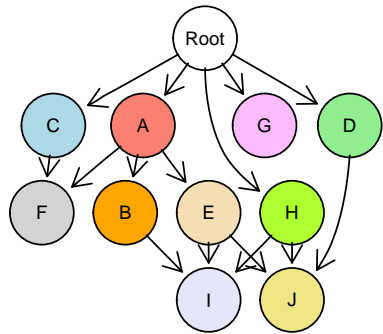

ID **UtTIZN4ssUPI1042T**  
 acc genotypes **142**  
 peaks no back 1  
 removed edges 0  
 prop rem edges 0

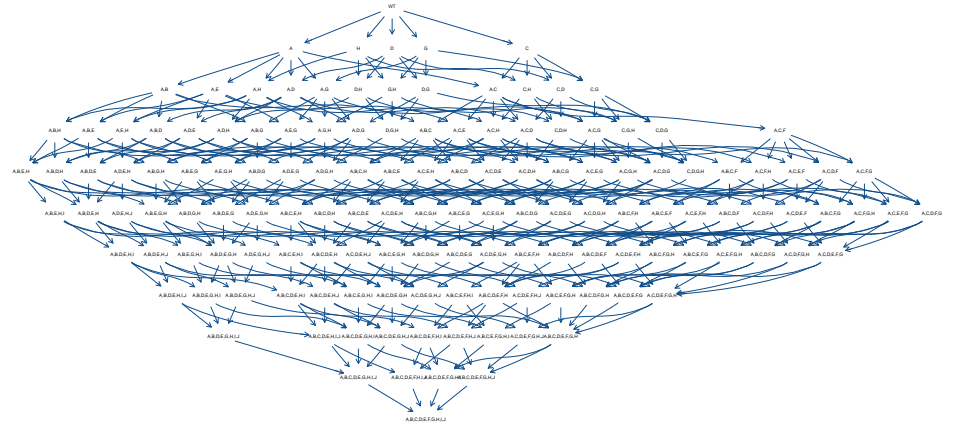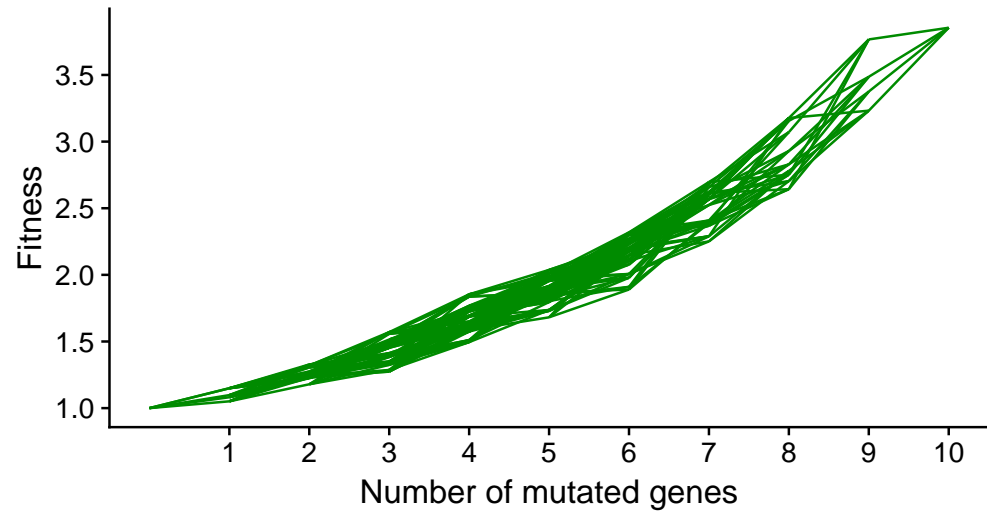



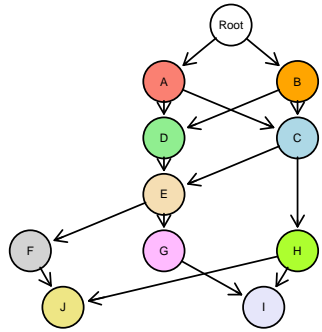

ID uU3eWnOFxxJy7Vct  
 acc genotypes 22  
 peaks no back 1  
 removed edges 0  
 prop rem edges 0

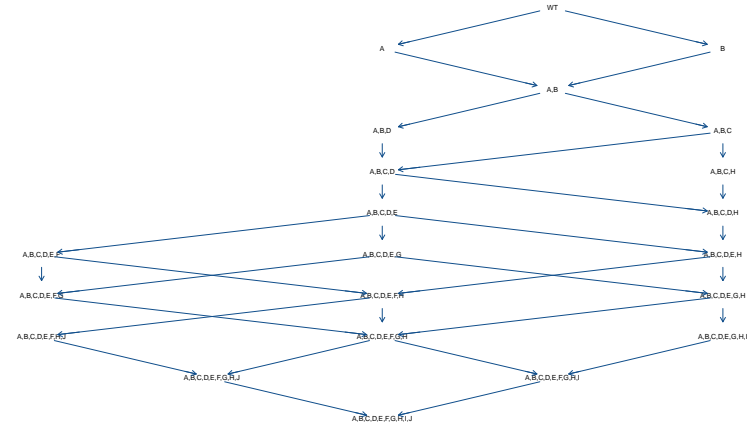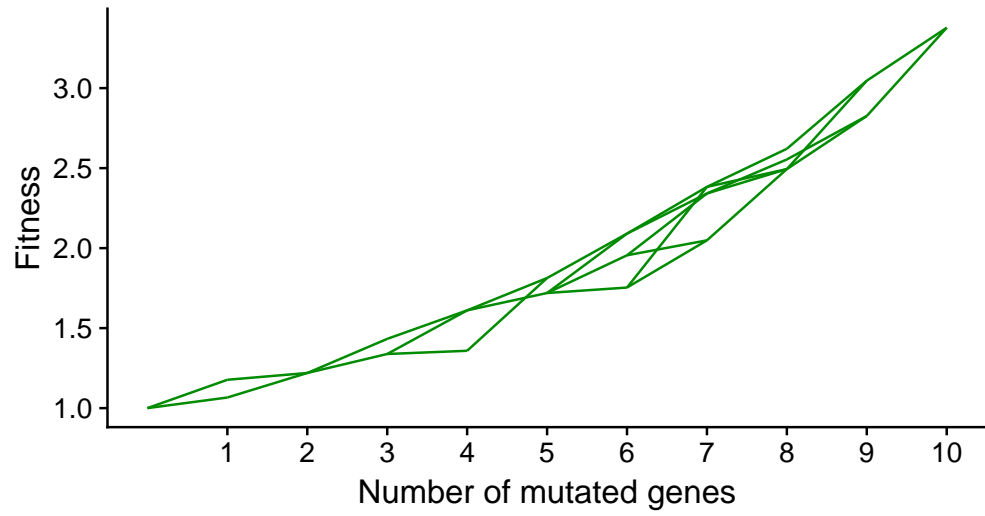

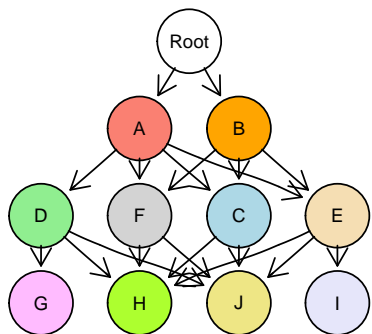

ID UvbbY5R10xG3o3Fbv  
 acc genotypes 53  
 peaks no back 1  
 removed edges 0  
 prop rem edges 0

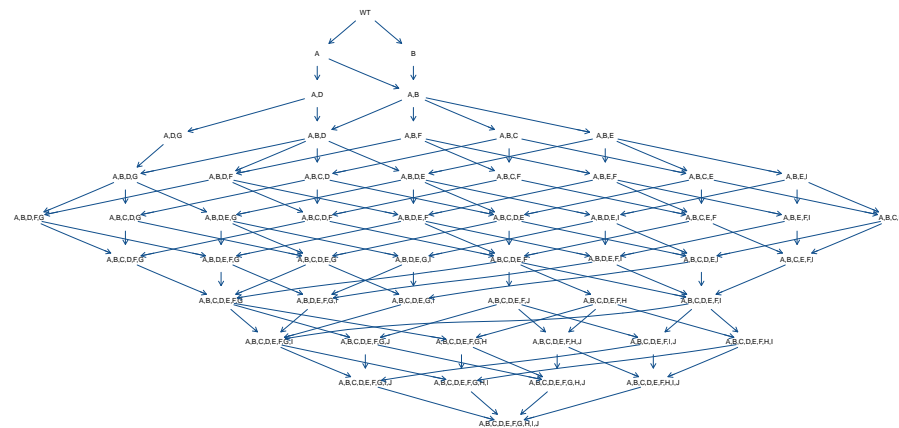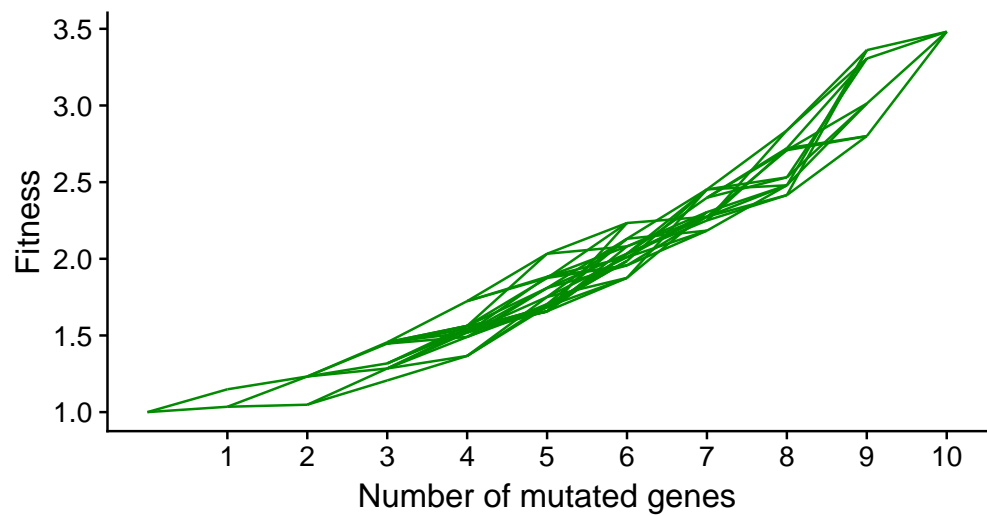

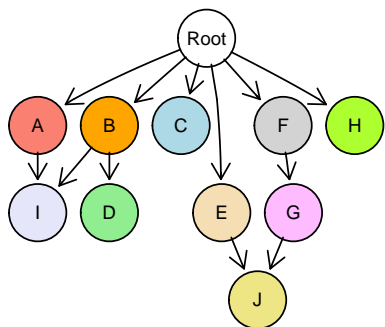

ID **uVPTmh9a12FoeCLG**  
 acc genotypes **224**  
 peaks no back 1  
 removed edges 0  
 prop rem edges 0

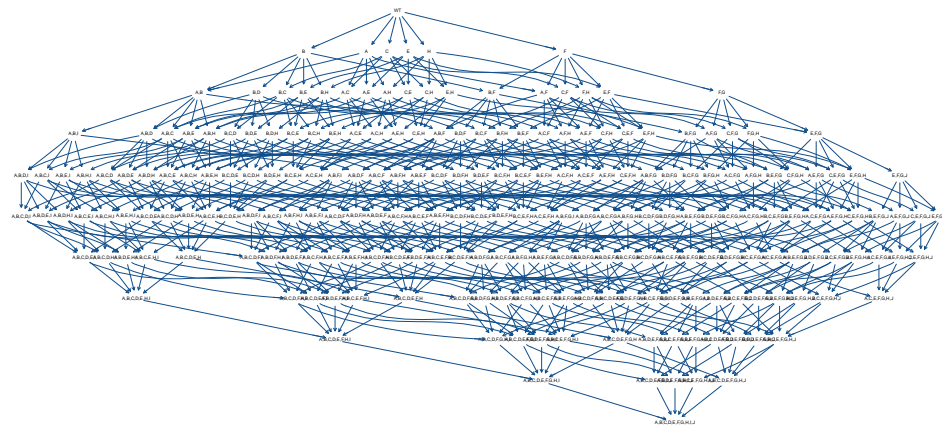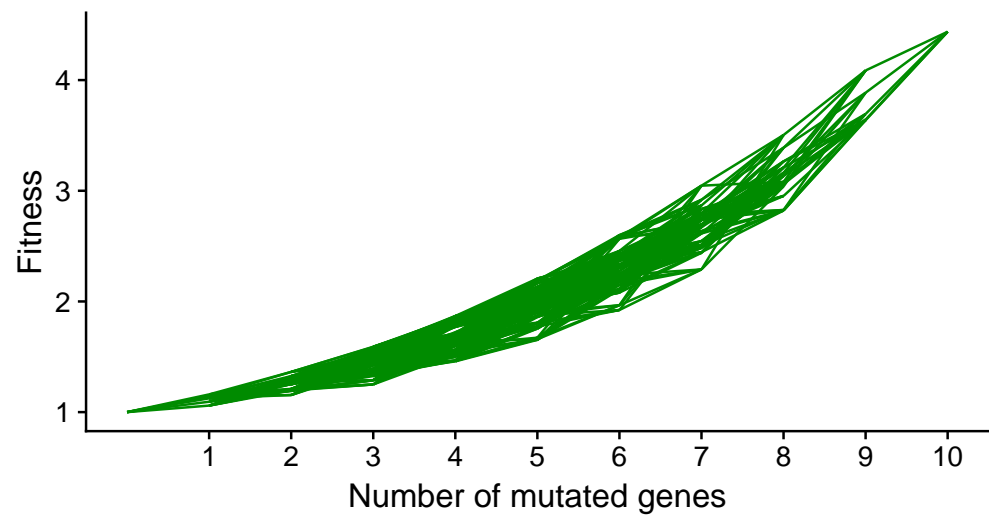

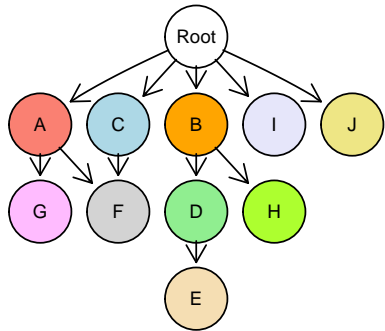

ID **uWAn38F57JFUrKmr**  
 acc genotypes **224**  
 peaks no back 1  
 removed edges 0  
 prop rem edges 0

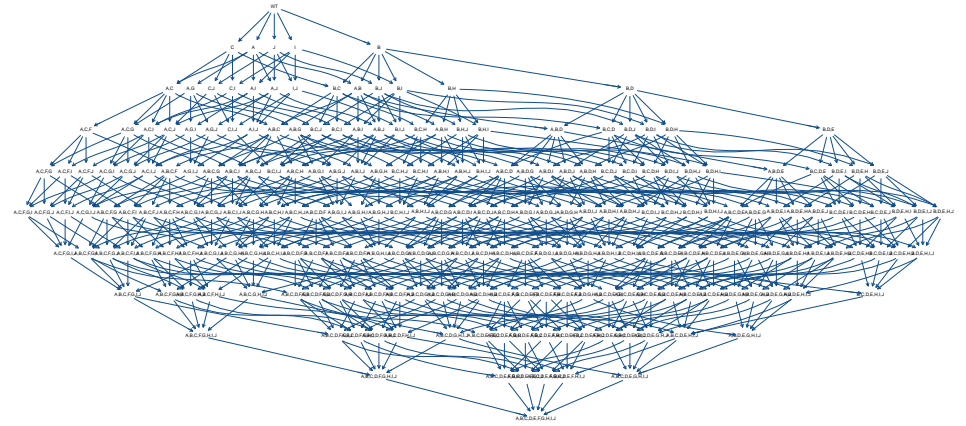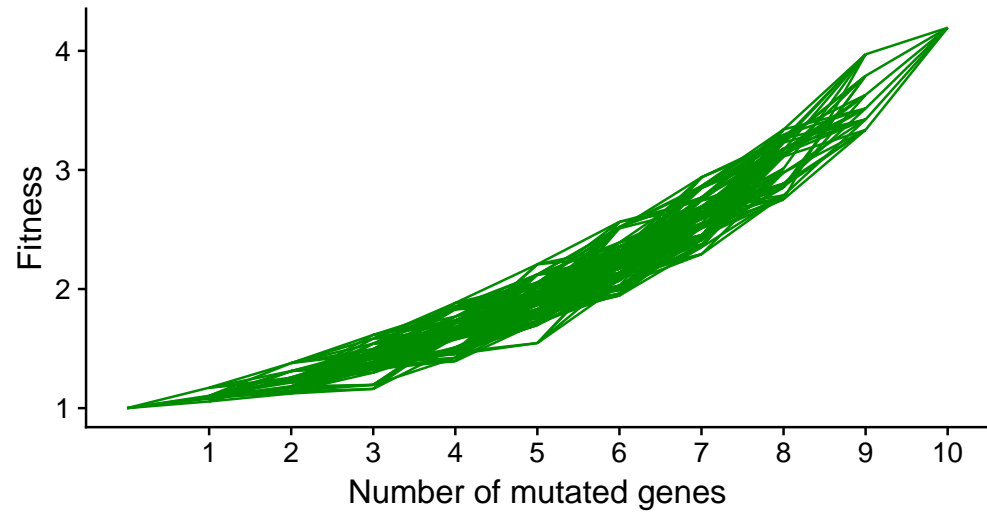

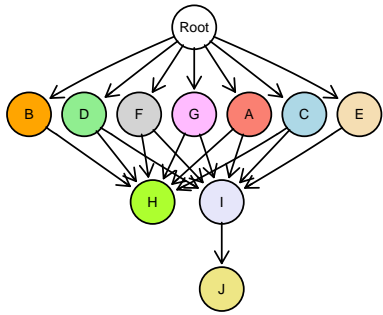

ID **UXtvbte61fs7Xr8g**  
 acc genotypes **136**  
 peaks no back 1  
 removed edges 0  
 prop rem edges 0

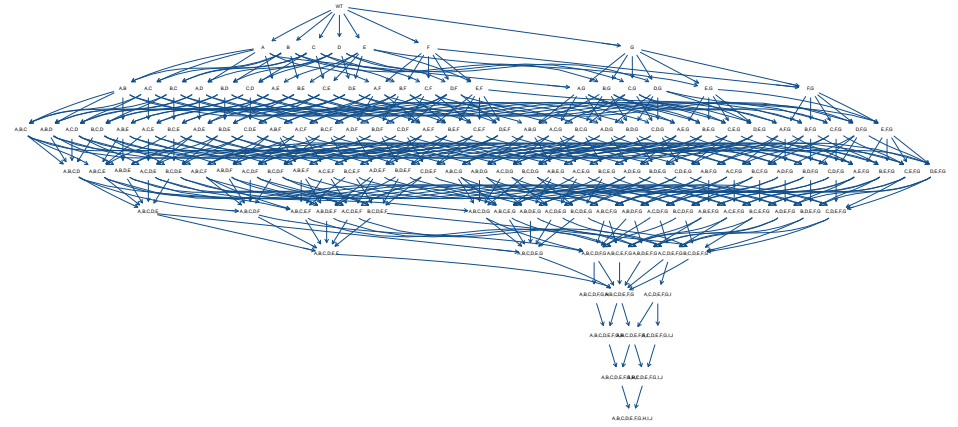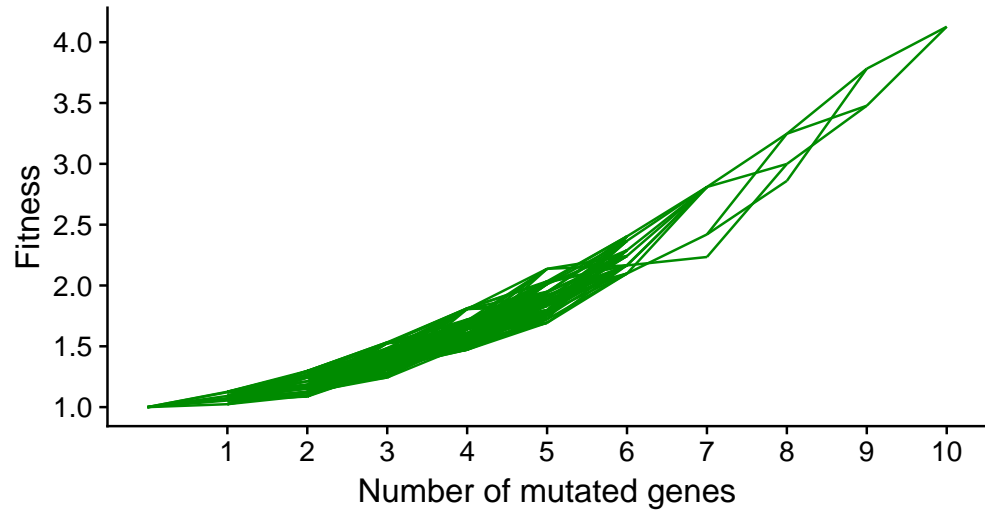

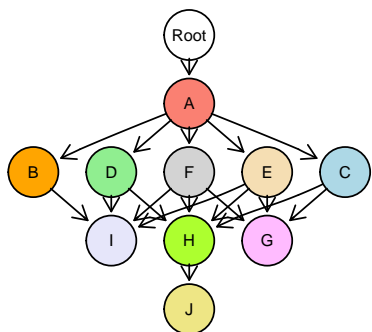

ID **v7v1qJcKO4kxs78T**  
 acc genotypes **52**  
 peaks no back 1  
 removed edges 0  
 prop rem edges 0

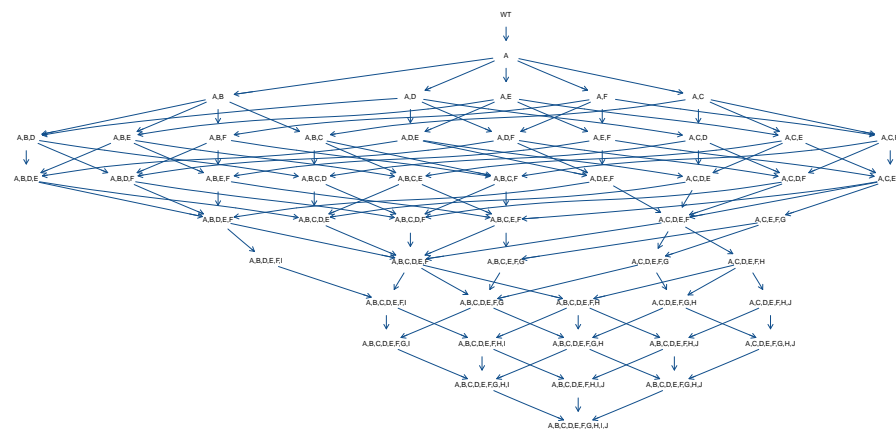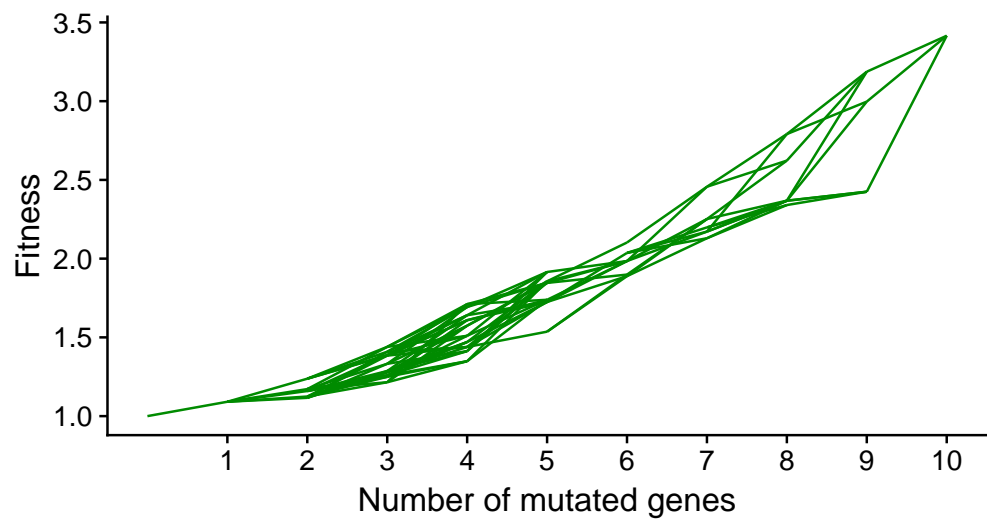



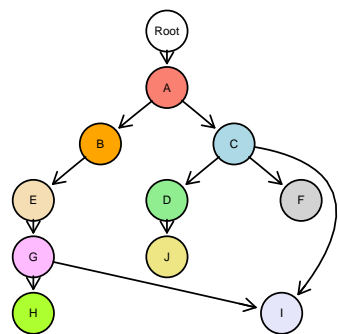

ID **VlrlHndJDehvx8p**  
 acc genotypes **48**  
 peaks no back 1  
 removed edges 0  
 prop rem edges 0

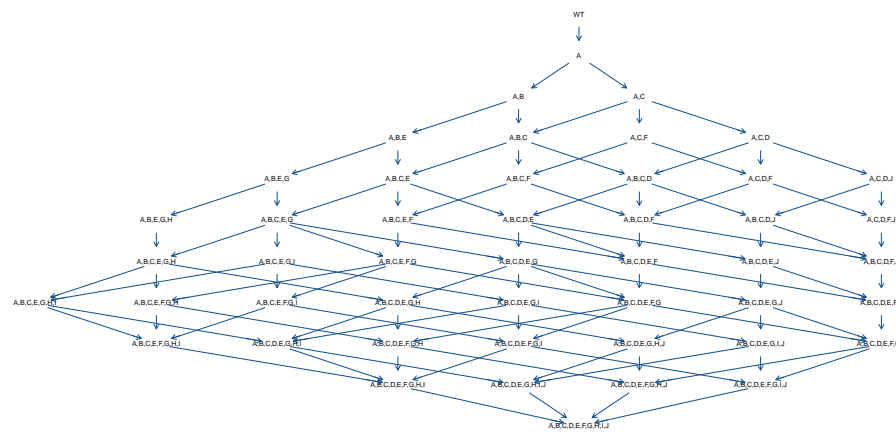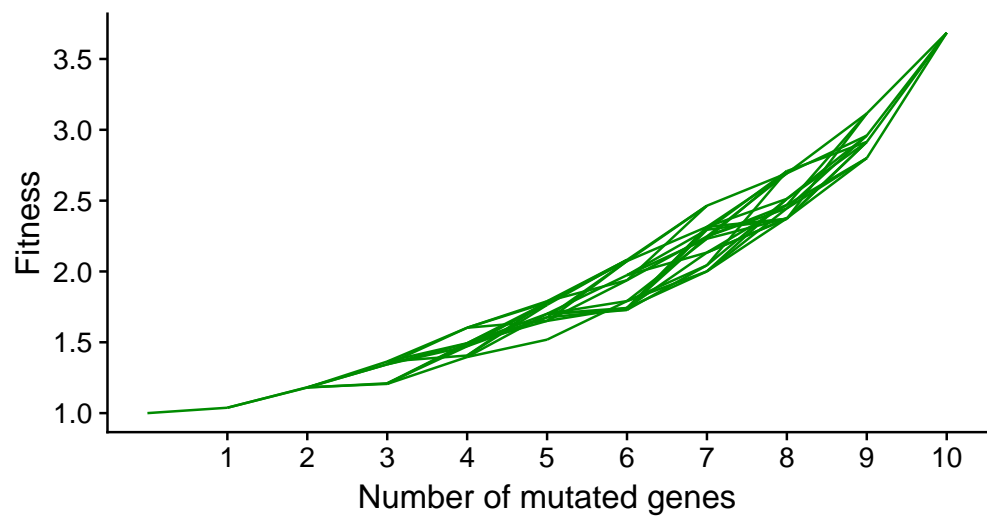



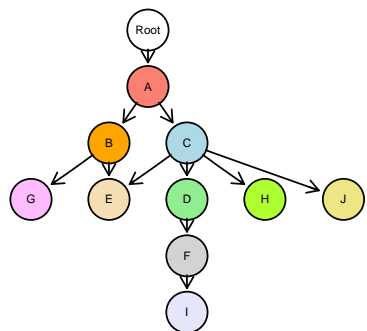

ID **vKqR1PxaeGDS6o2G**  
 acc genotypes **84**  
 peaks no back 1  
 removed edges 0  
 prop rem edges 0

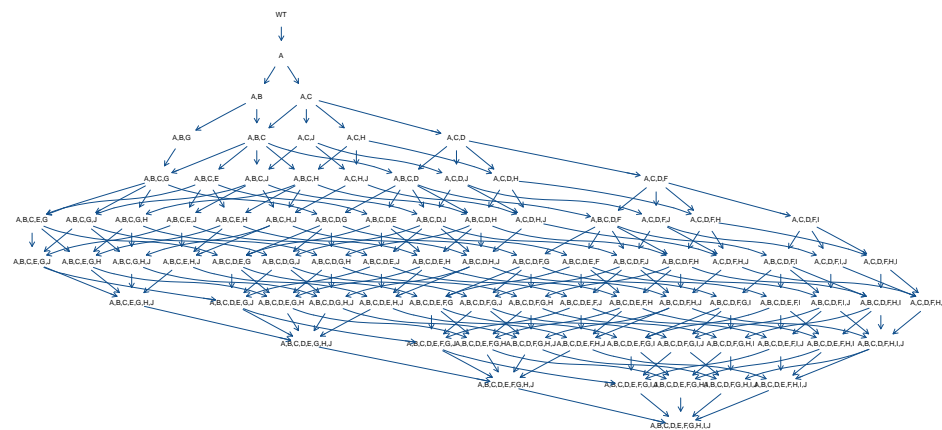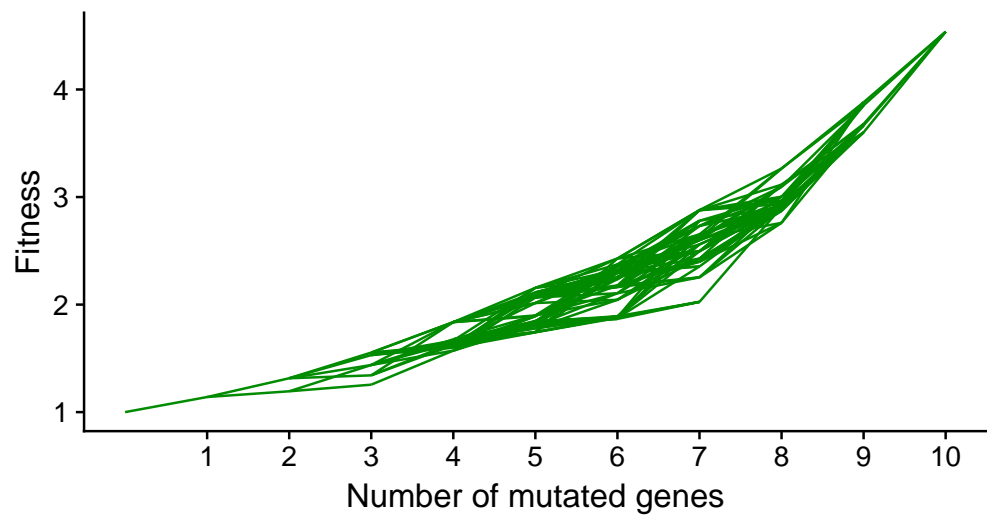

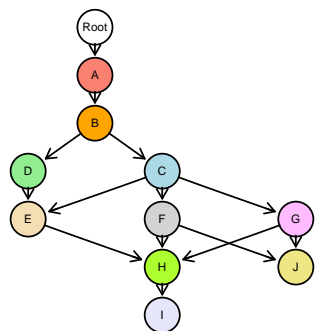

ID vWa8dLmVr7VaMVrU  
 acc genotypes 23  
 peaks no back 1  
 removed edges 0  
 prop rem edges 0

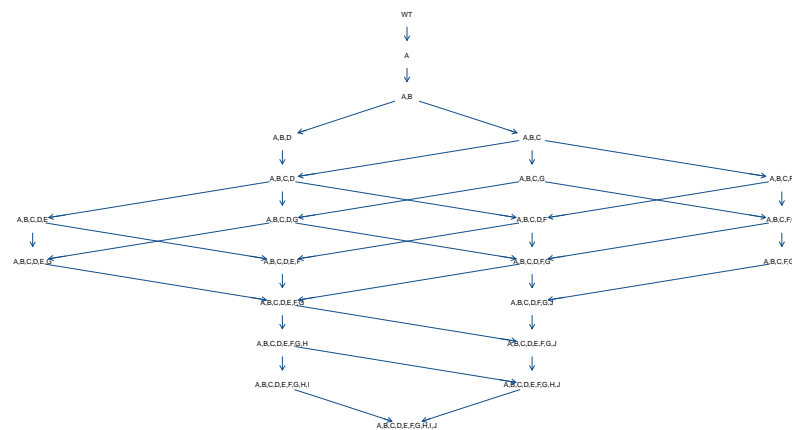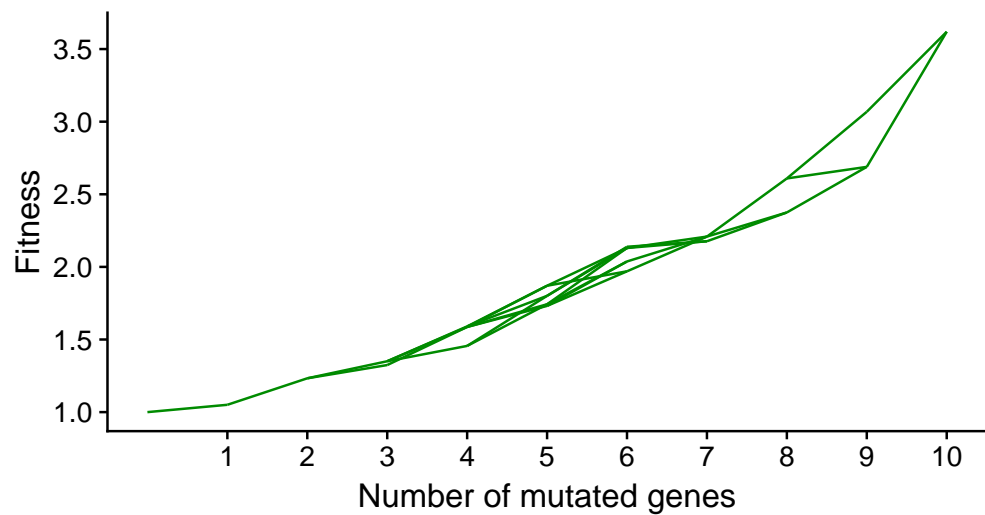

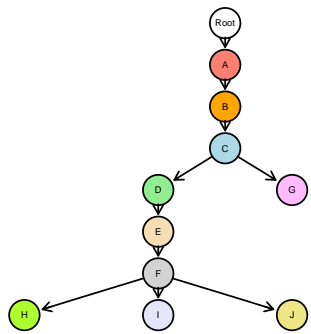

ID **W10RExqb1hvnBZhkz**  
 acc genotypes **25**  
 peaks no back 1  
 removed edges 0  
 prop rem edges 0

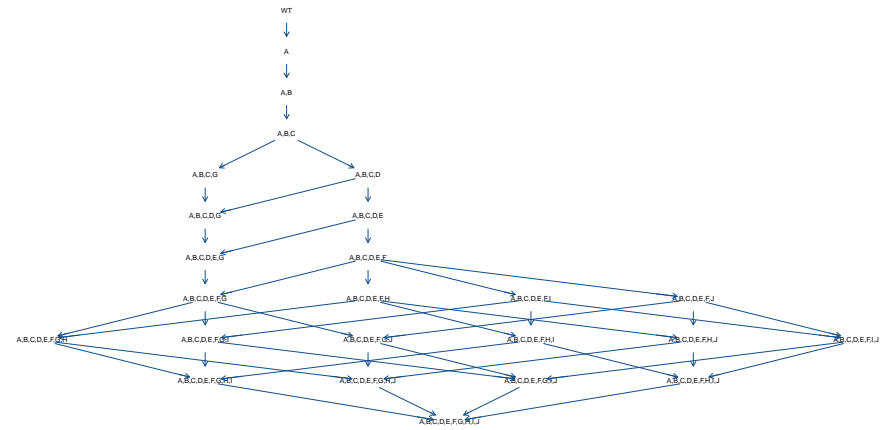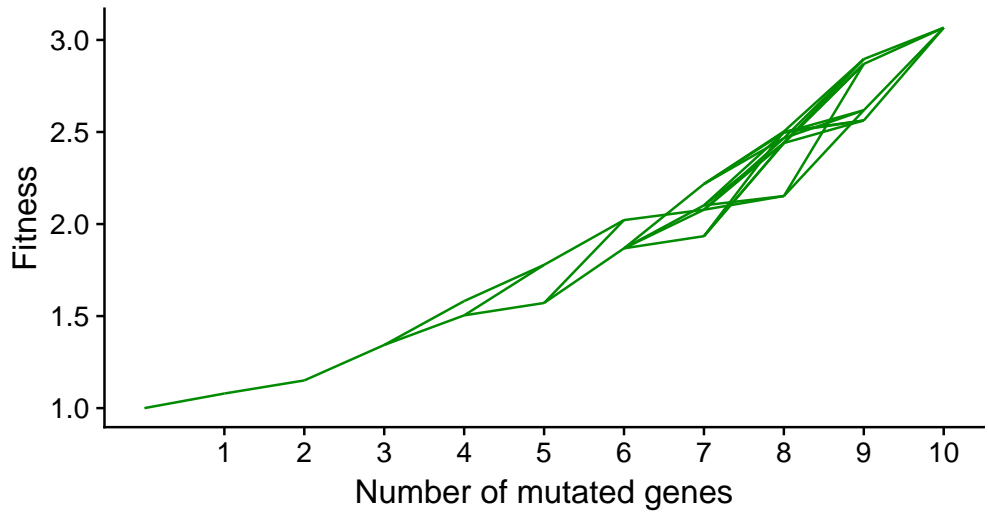

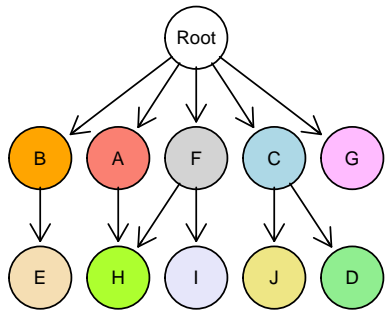

*ID* w2LGyrZeMILULsIK  
*acc genotypes* 240  
*peaks no back* 1  
*removed edges* 0  
*prop rem edges* 0

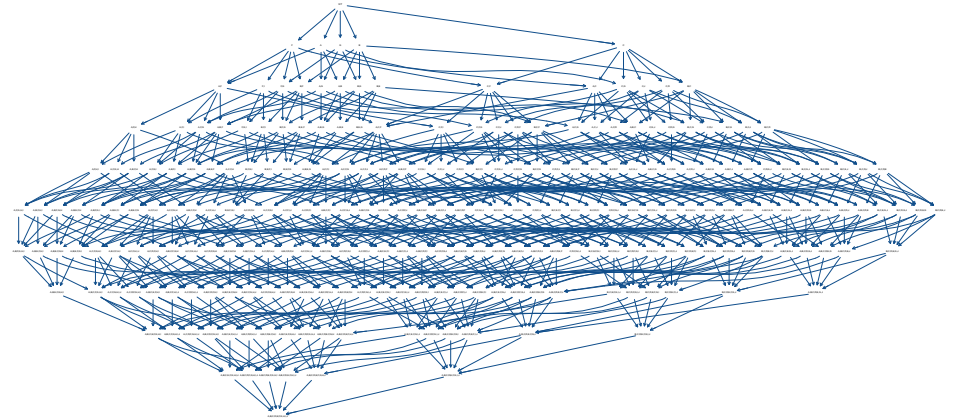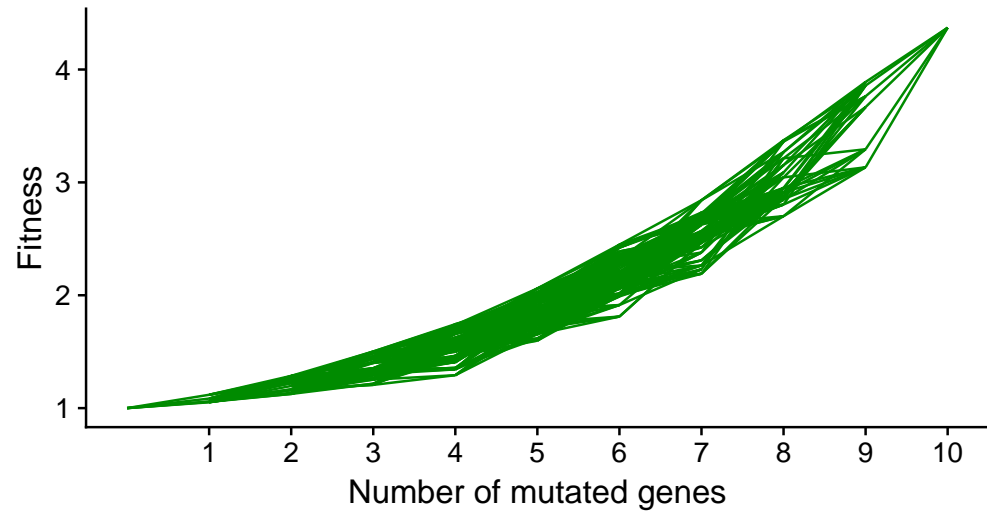

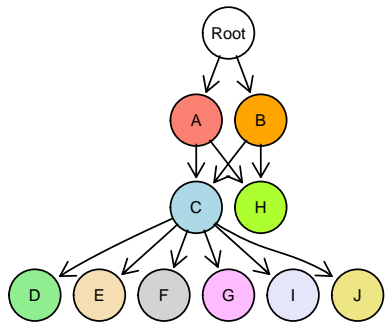

ID wOVnm2kwBXXY2Fm4  
 acc genotypes 133  
 peaks no back 1  
 removed edges 0  
 prop rem edges 0

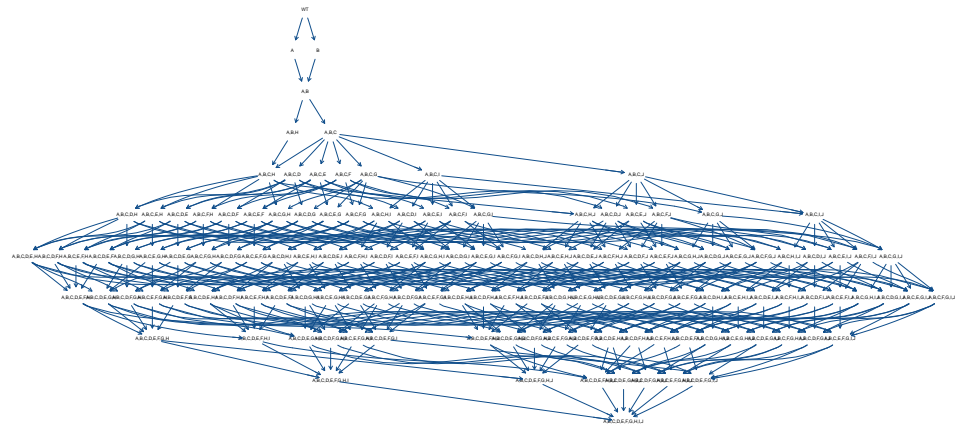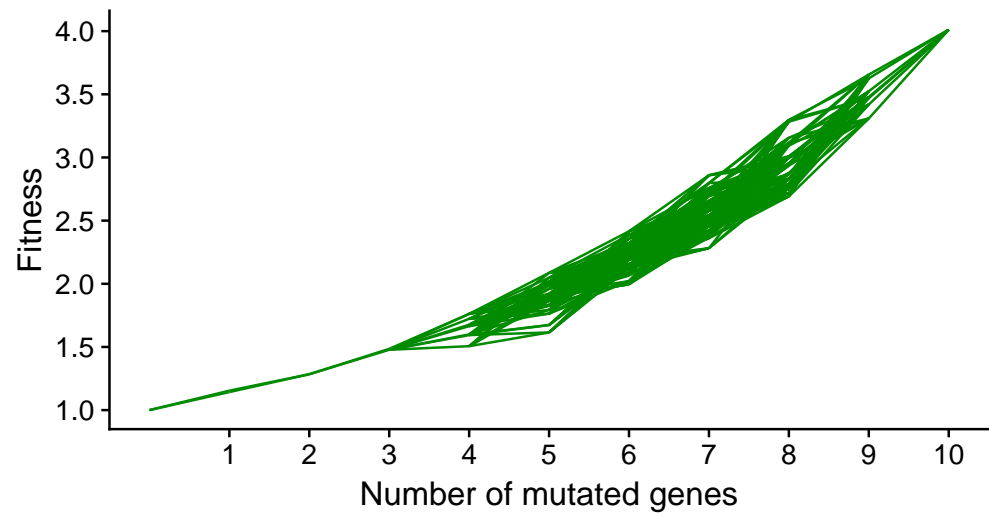

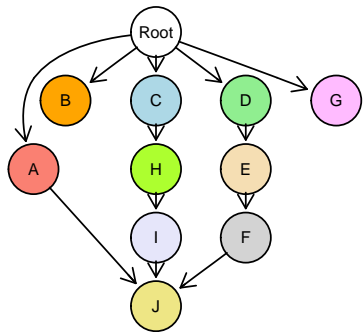

ID **WX2rq5CKiTz10Vbzs**  
 acc genotypes **132**  
 peaks no back 1  
 removed edges 0  
 prop rem edges 0

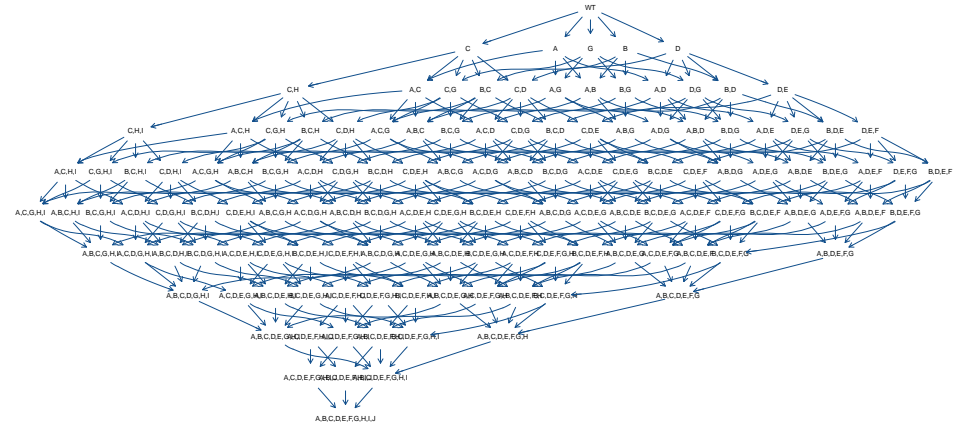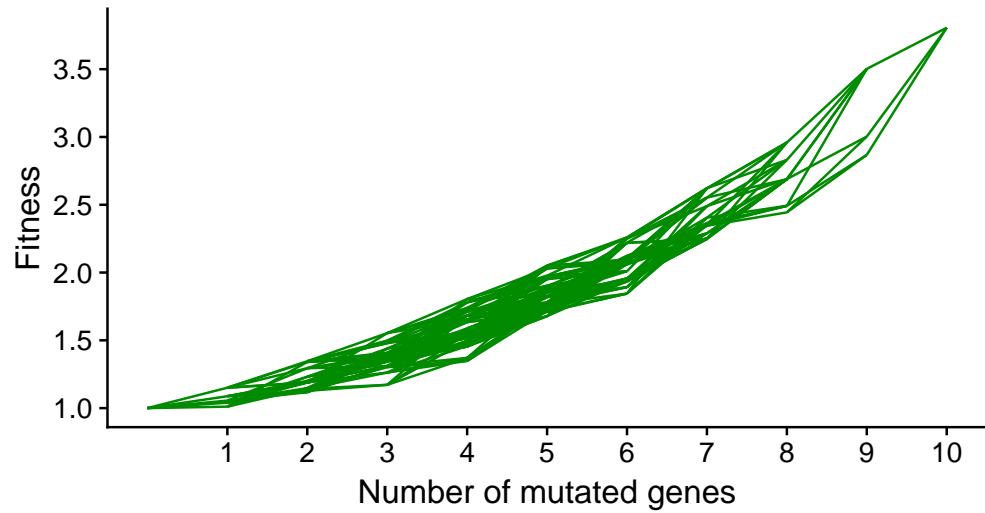

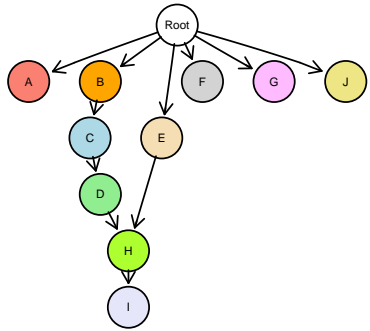

ID X73CthbrahOJ65dM  
 acc genotypes 160  
 peaks no back 1  
 removed edges 0  
 prop rem edges 0

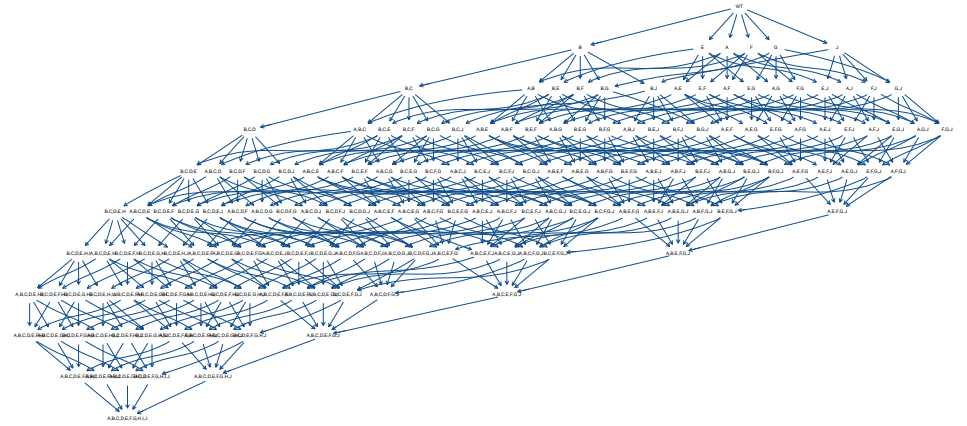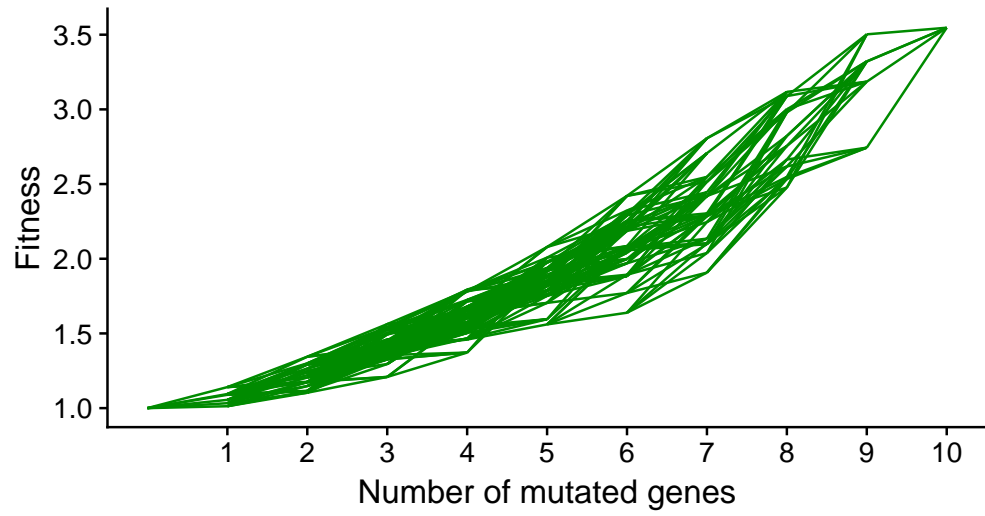

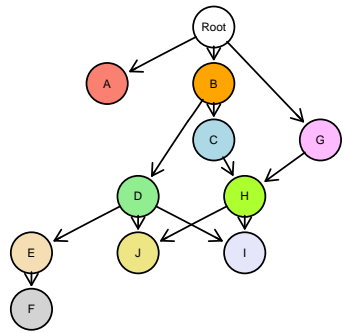

ID **xghzdPbC2Ste8yA4**  
 acc genotypes **62**  
 peaks no back 1  
 removed edges 0  
 prop rem edges 0

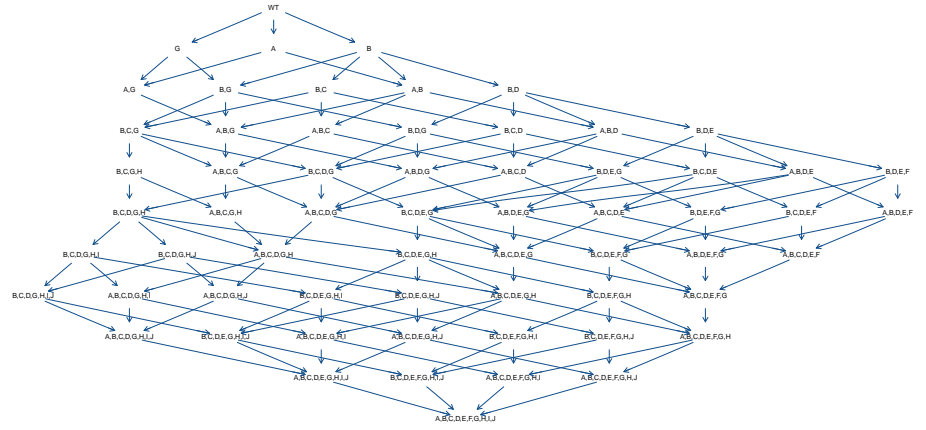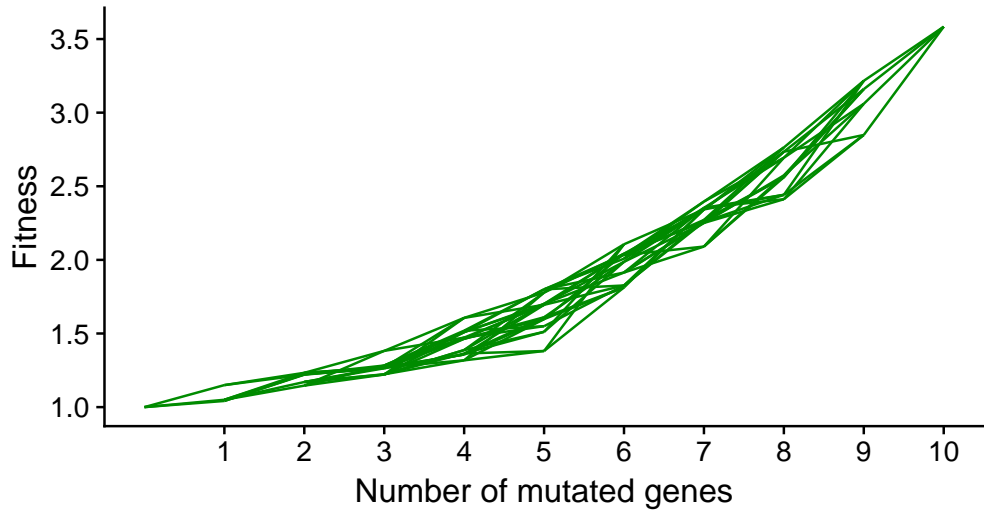



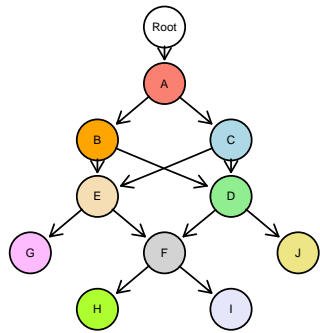

ID `xsBe1fvNRQrAYKEK`  
 acc genotypes 29  
 peaks no back 1  
 removed edges 0  
 prop rem edges 0

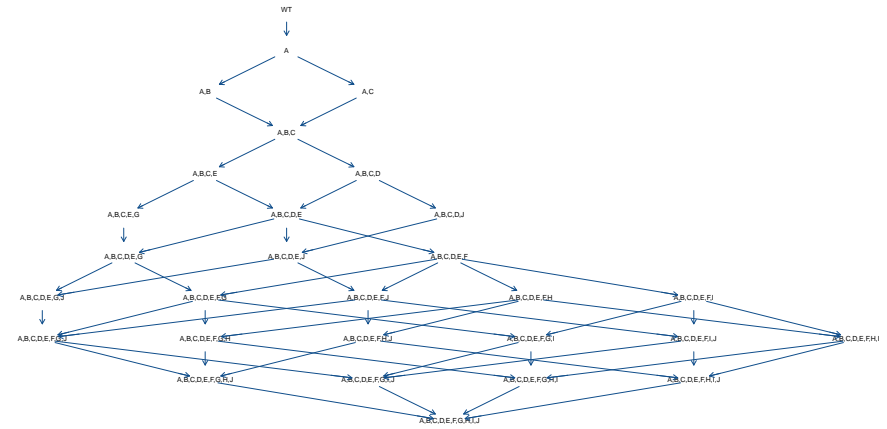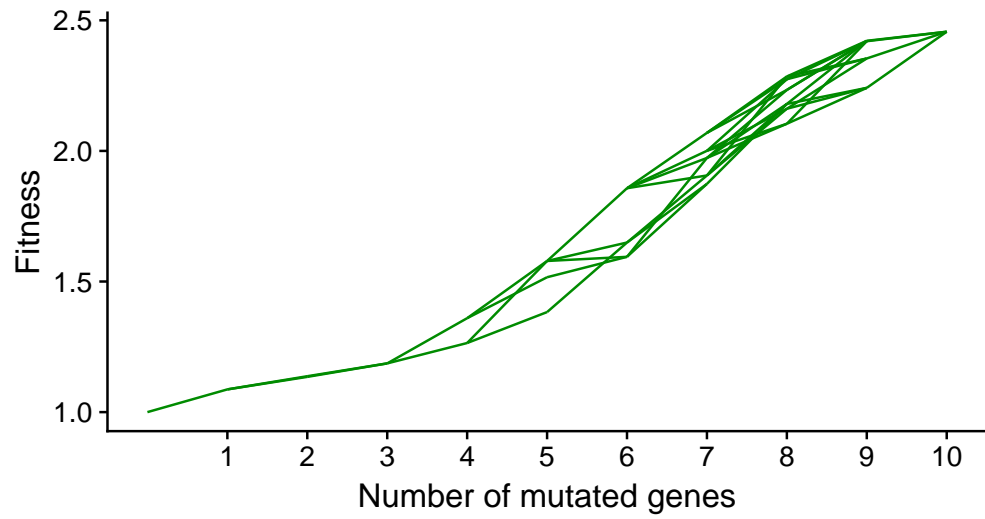

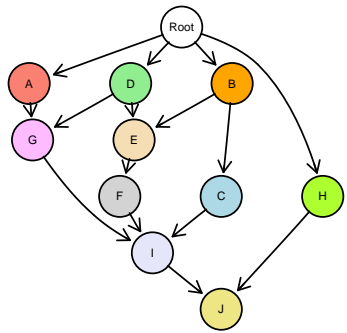

ID `xTeo6GEUfqWOarjY`  
 acc genotypes **57**  
 peaks no back 1  
 removed edges 0  
 prop rem edges 0

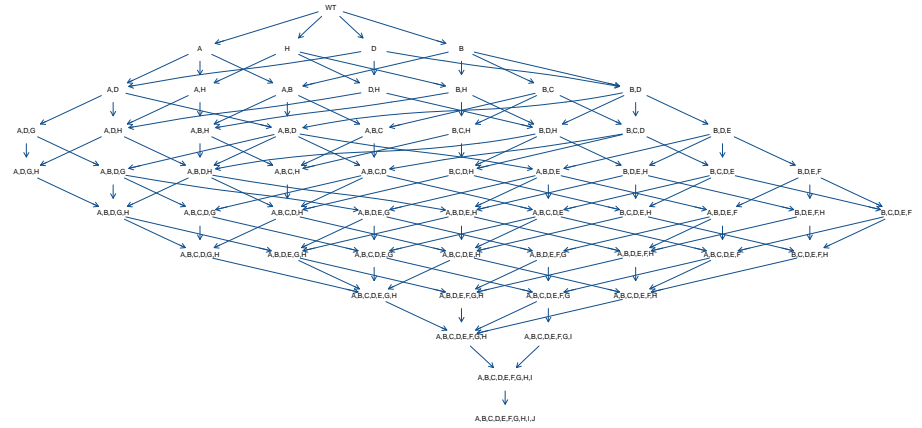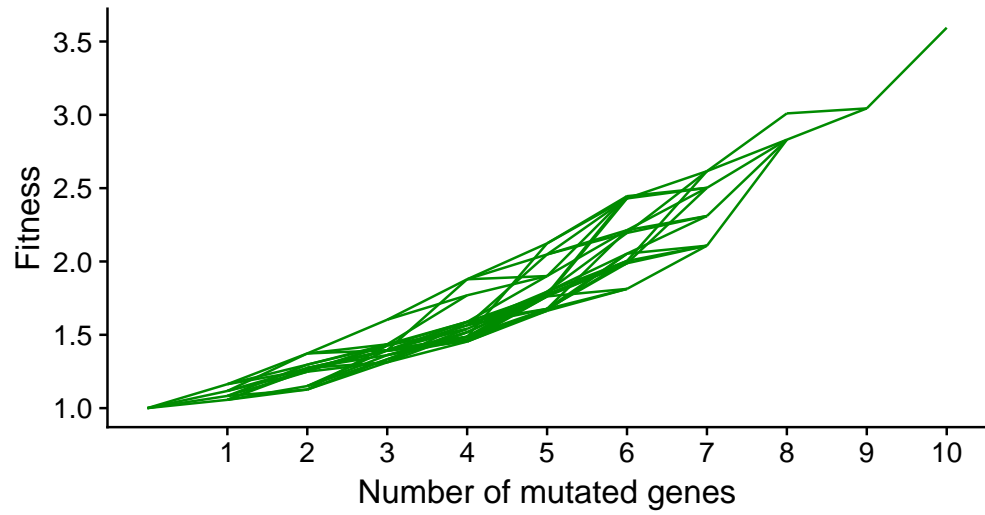

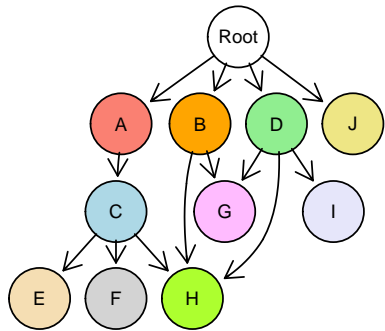

ID **xUB10YVej3P32RKii**  
 acc genotypes **128**  
 peaks no back 1  
 removed edges 0  
 prop rem edges 0

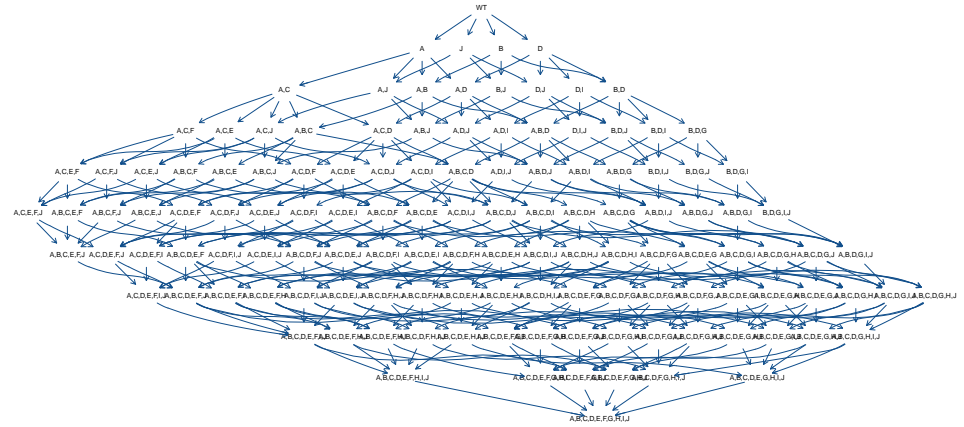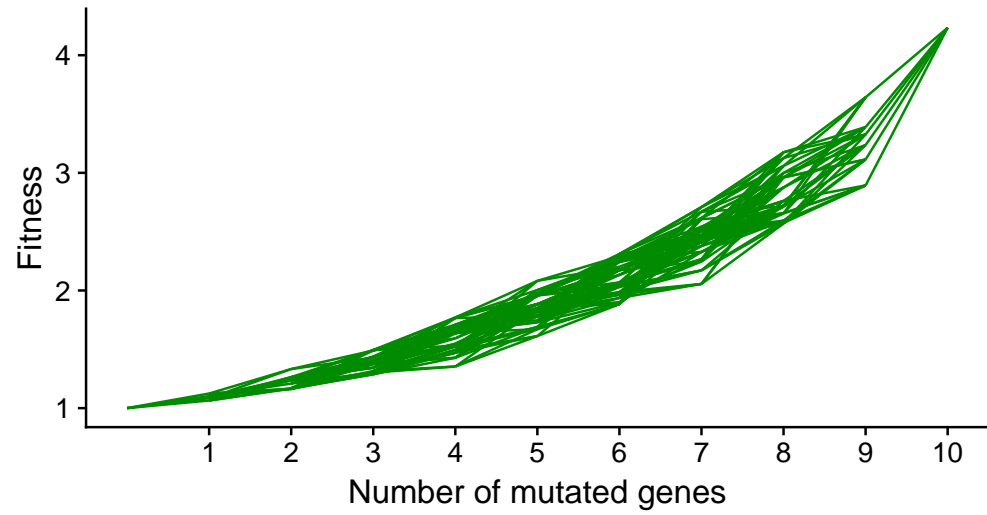

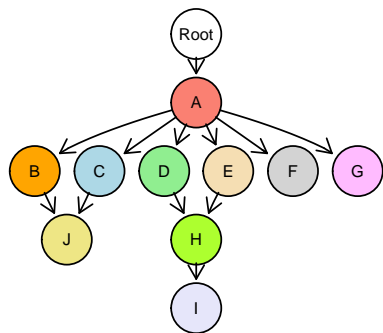

ID **xVYnsd10xBjzI3Lt2**  
 acc genotypes **121**  
 peaks no back 1  
 removed edges 0  
 prop rem edges 0

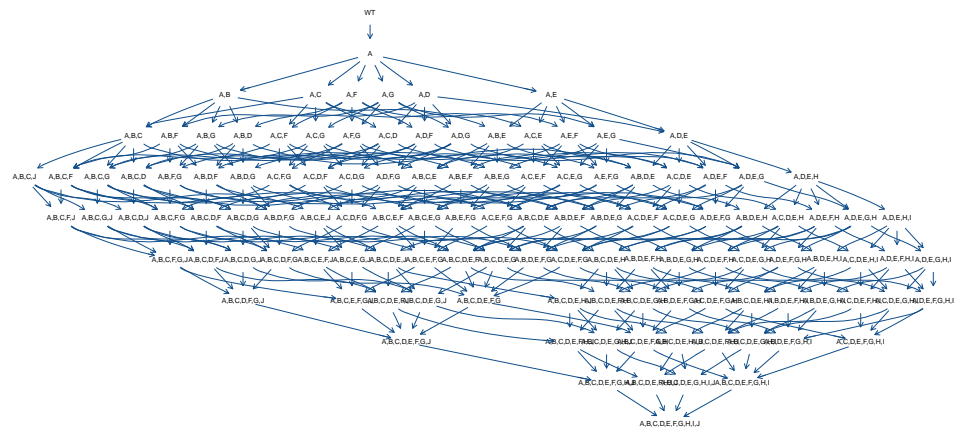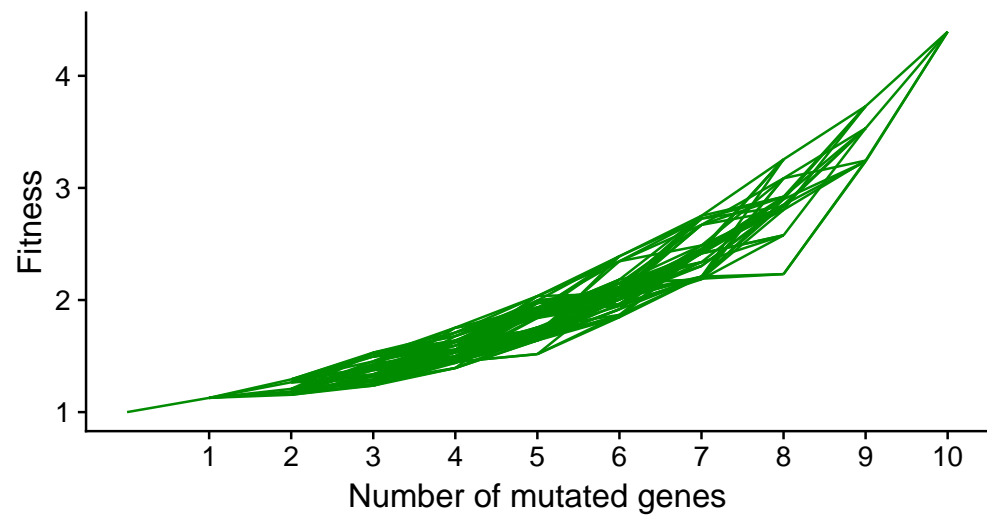

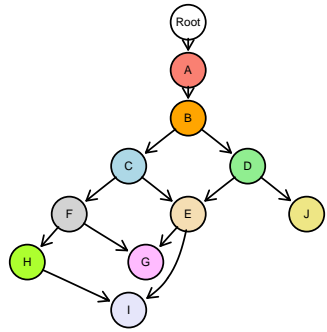

ID **xWR3MCuUy8RkrLHF**  
 acc genotypes **28**  
 peaks no back **1**  
 removed edges **0**  
 prop rem edges **0**

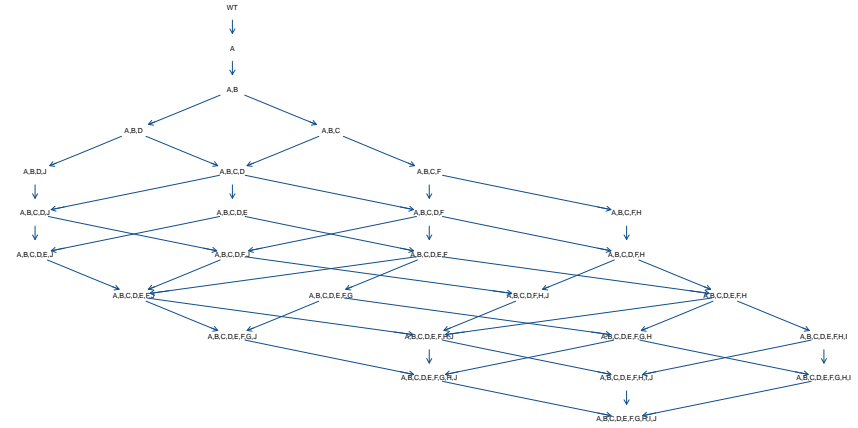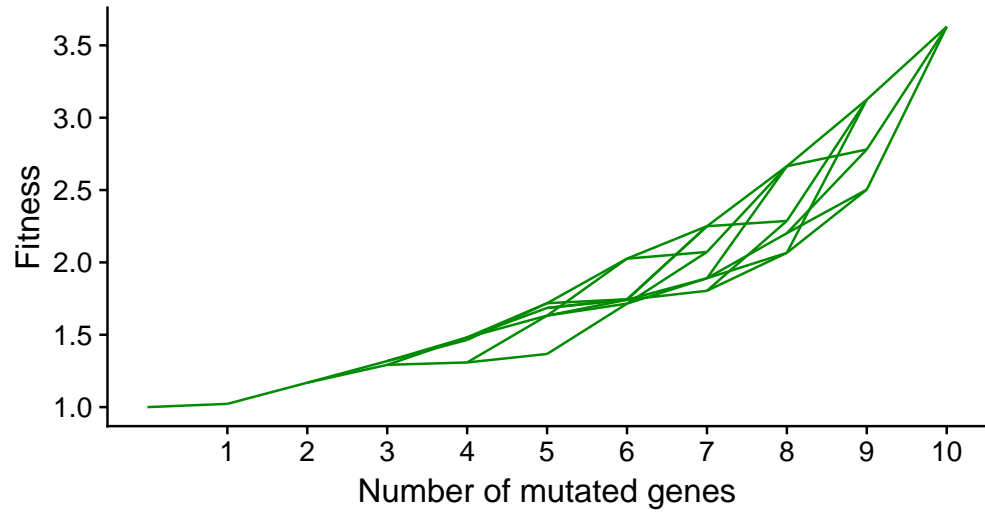

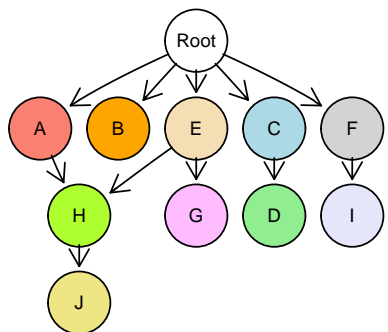

ID XYVDPlvrNBjywJzR  
 acc genotypes 180  
 peaks no back 1  
 removed edges 0  
 prop rem edges 0

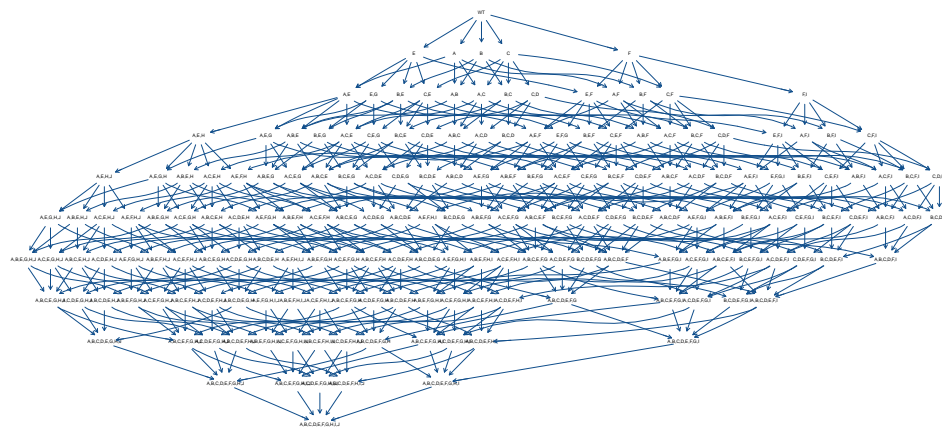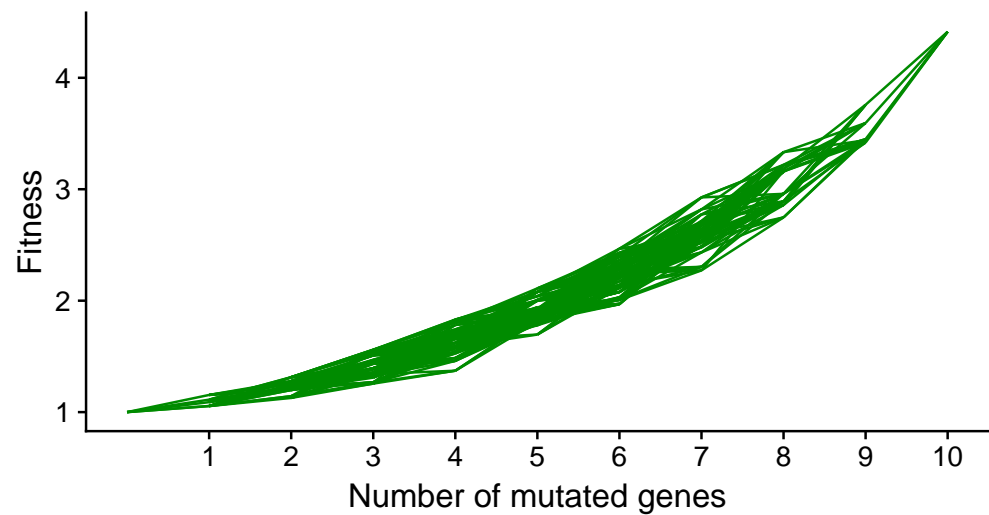

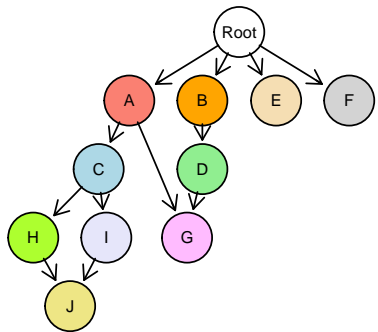

ID **y1DWAEMgCsc8ELI2**  
 acc genotypes **108**  
 peaks no back 1  
 removed edges 0  
 prop rem edges 0

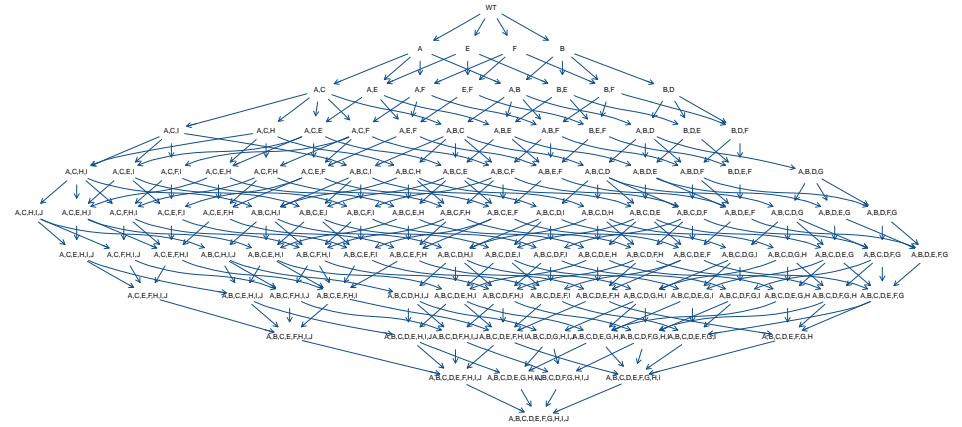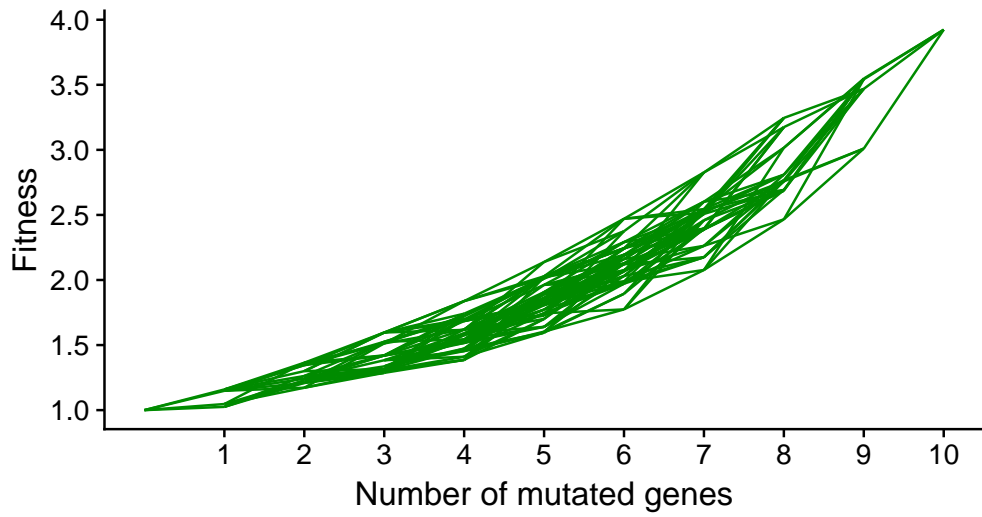

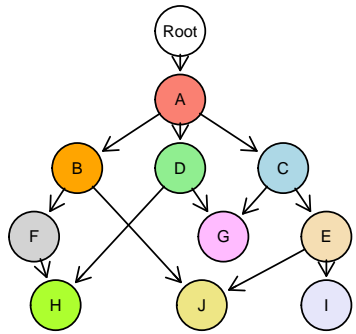

ID **y910g6HDInpD8GSSB**  
 acc genotypes **57**  
 peaks no back 1  
 removed edges 0  
 prop rem edges 0

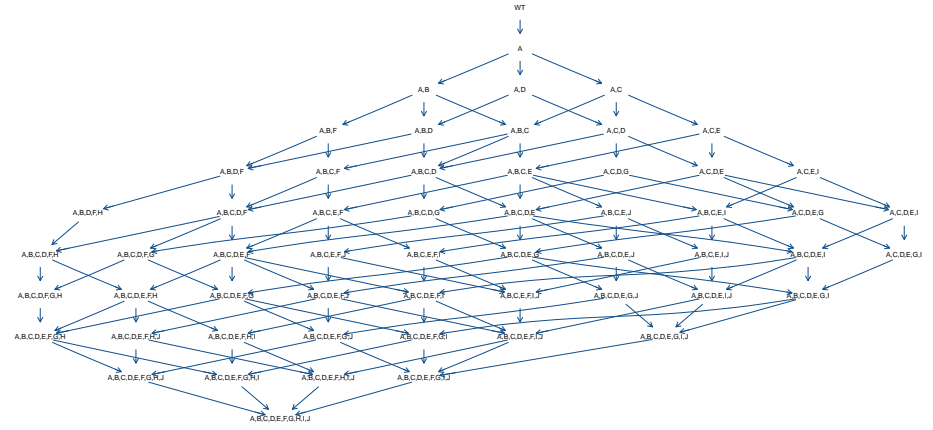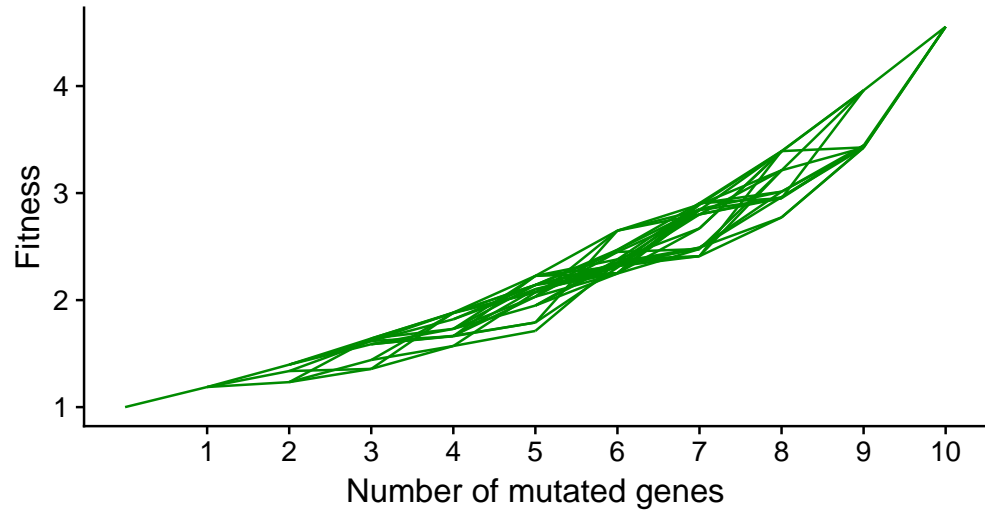



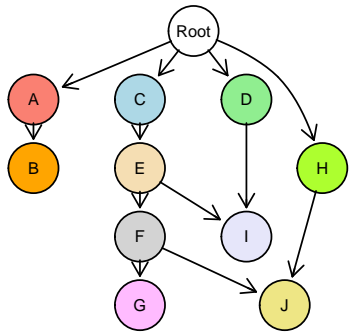

ID **YbPjwENMtPWo53FW**  
 acc genotypes **96**  
 peaks no back 1  
 removed edges 0  
 prop rem edges 0

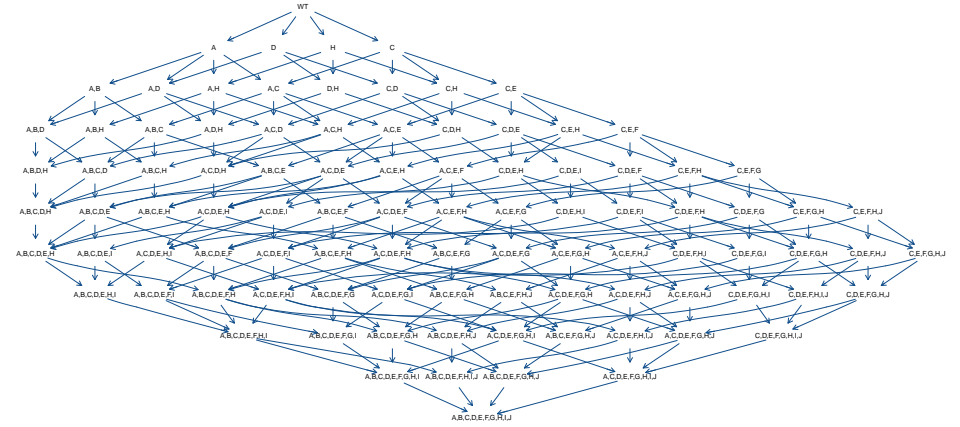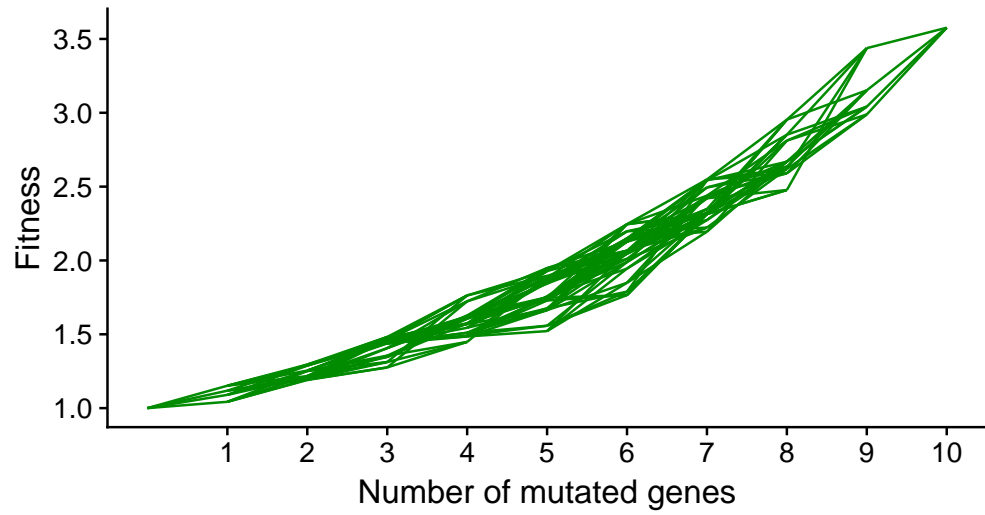

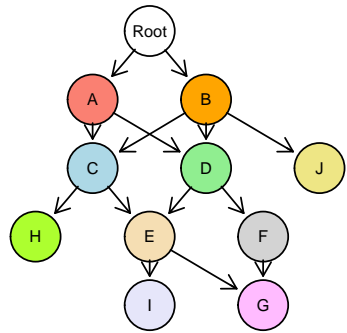

ID YDOzLX10m8IHyrpAK  
 acc genotypes 46  
 peaks no back 1  
 removed edges 0  
 prop rem edges 0

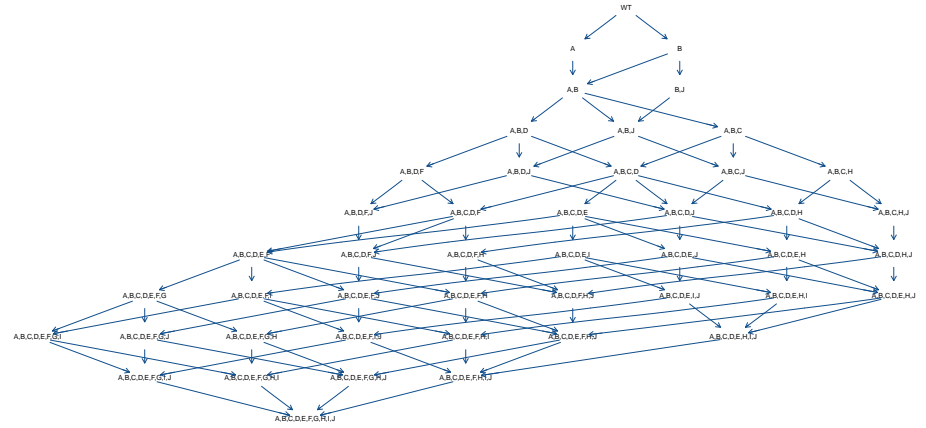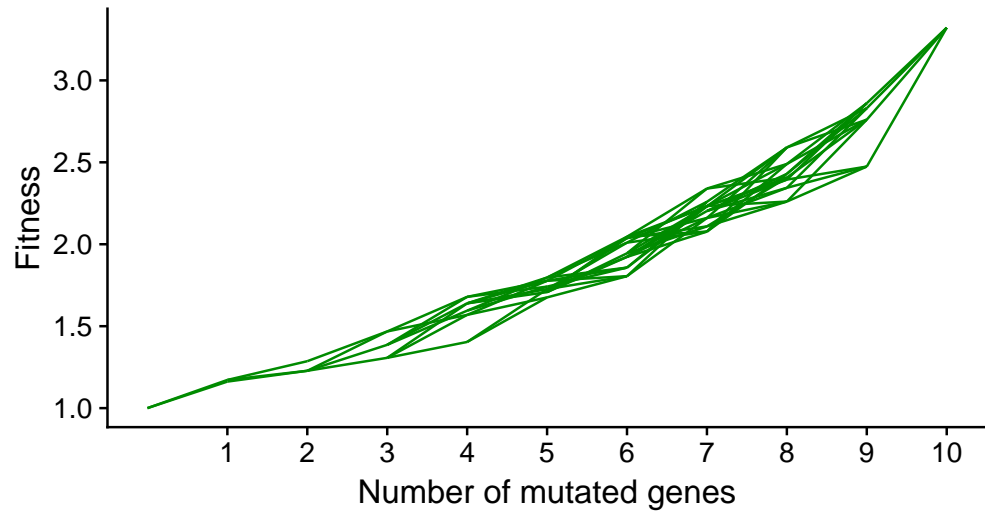

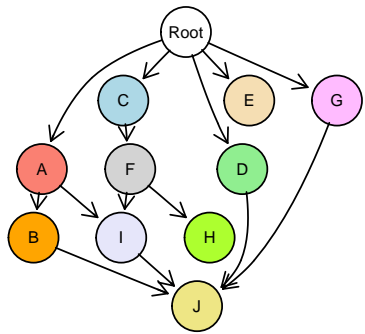

ID **yKg7RfKP7wBk10kV3**  
 acc genotypes **132**  
 peaks no back 1  
 removed edges 0  
 prop rem edges 0

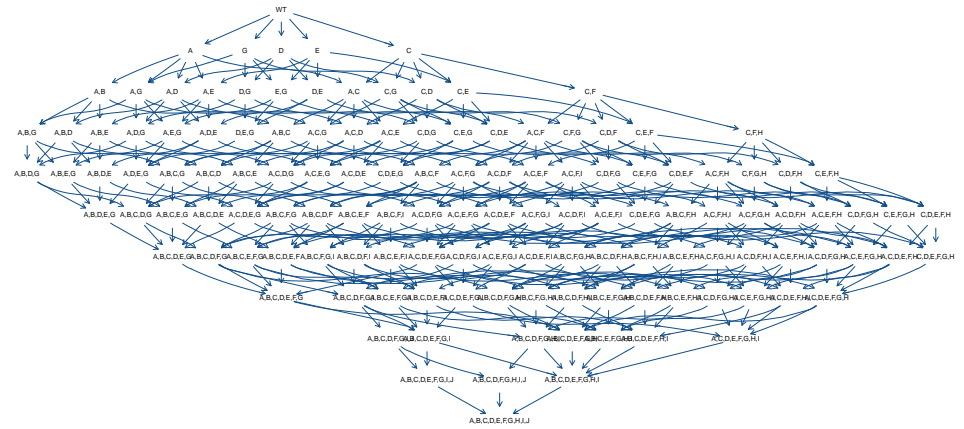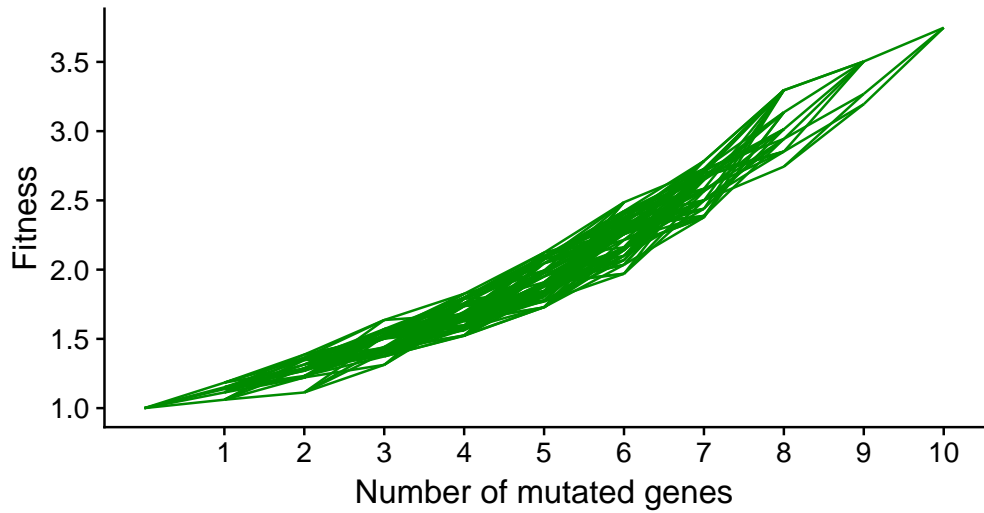

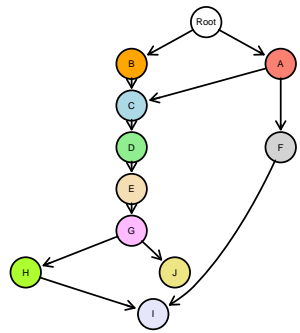

ID **YINcYnp363stUXfS**  
 acc genotypes **22**  
 peaks no back 1  
 removed edges 0  
 prop rem edges 0

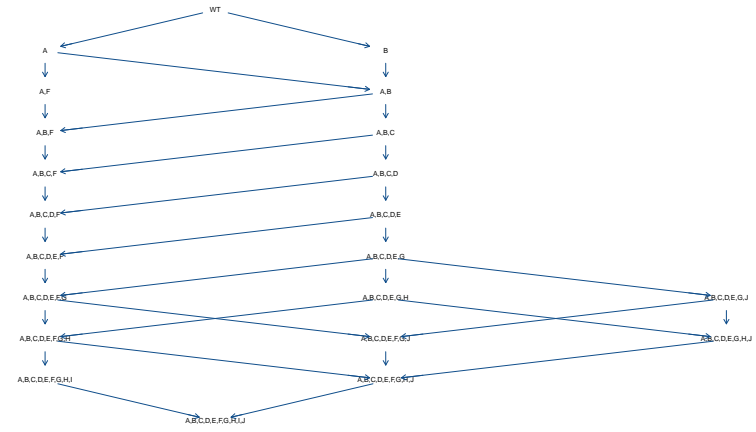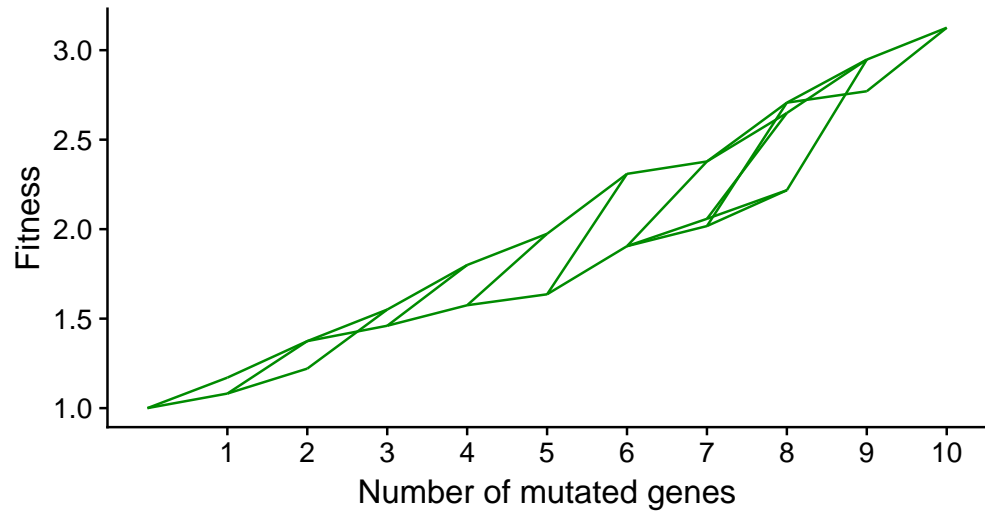

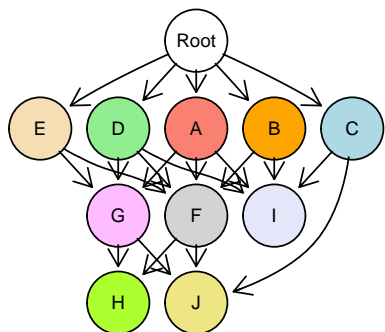

ID **YlnEDjC9bTawZFRa**  
 acc genotypes **52**  
 peaks no back 1  
 removed edges 0  
 prop rem edges 0

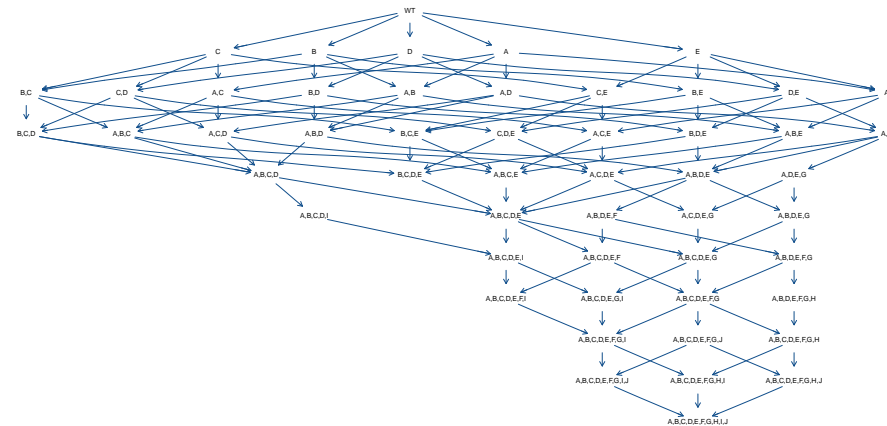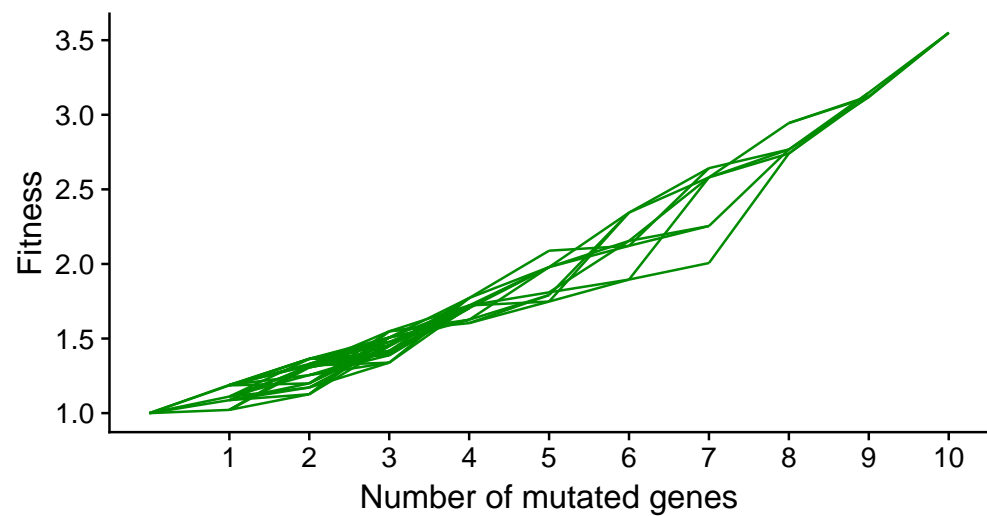

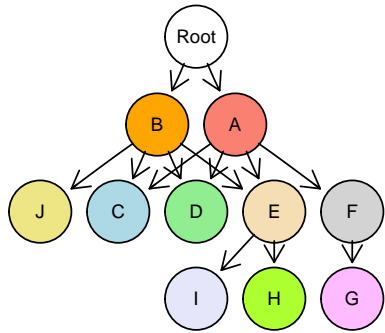

ID YsJ3QBe72KOpkYgG  
 acc genotypes 126  
 peaks no back 1  
 removed edges 0  
 prop rem edges 0

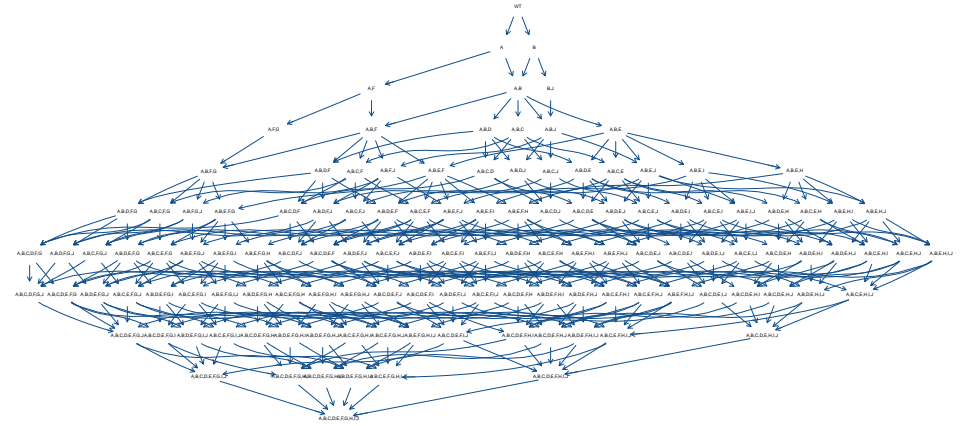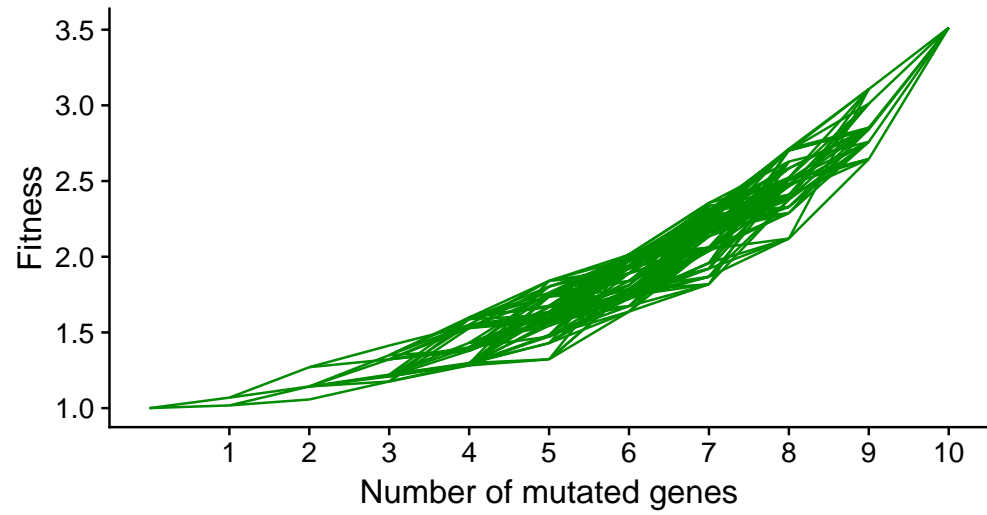

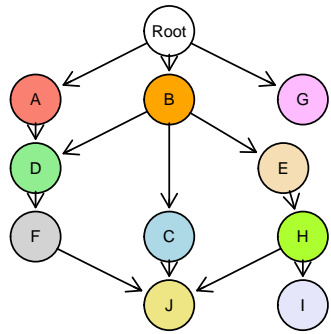

ID **yUkCSfeekAS3UsYq**  
 acc genotypes **72**  
 peaks no back 1  
 removed edges 0  
 prop rem edges 0

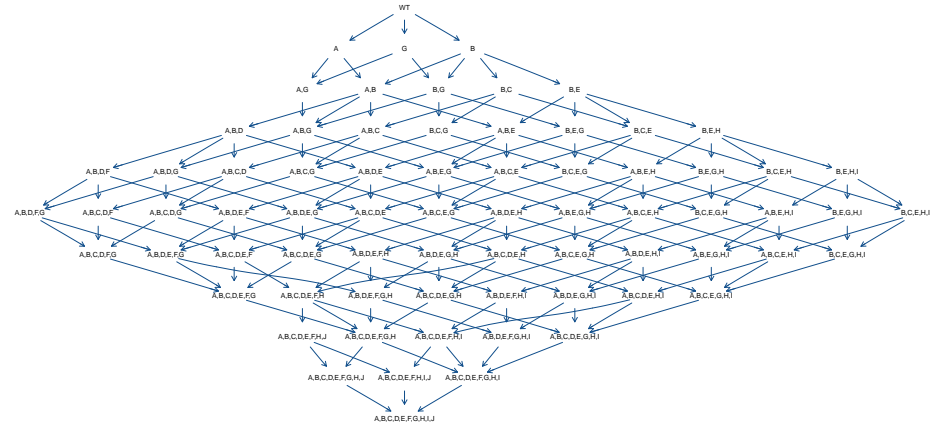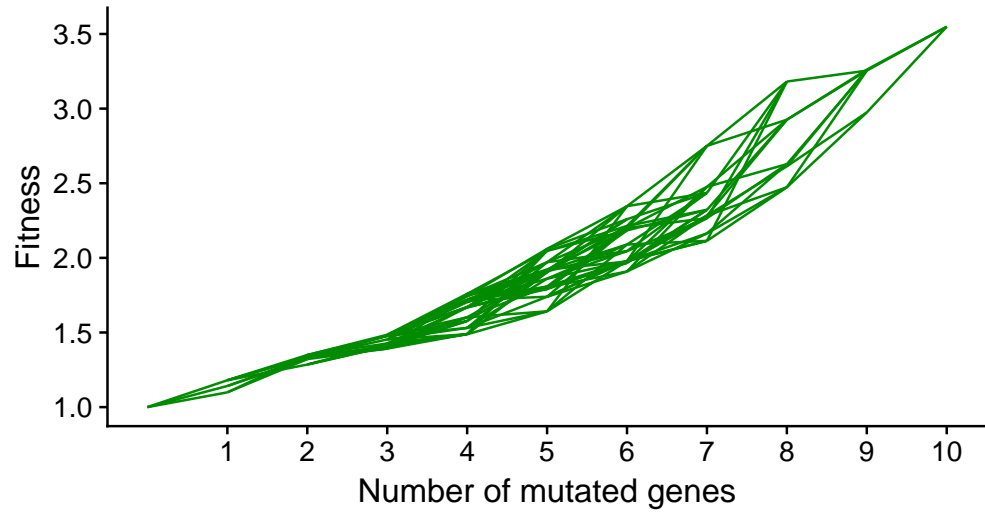

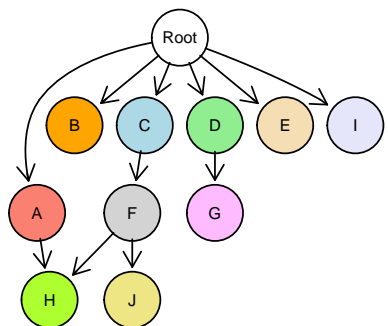

*ID* z1gqmdhtodgm6biP  
*acc genotypes* 240  
*peaks no back* 1  
*removed edges* 0  
*prop rem edges* 0

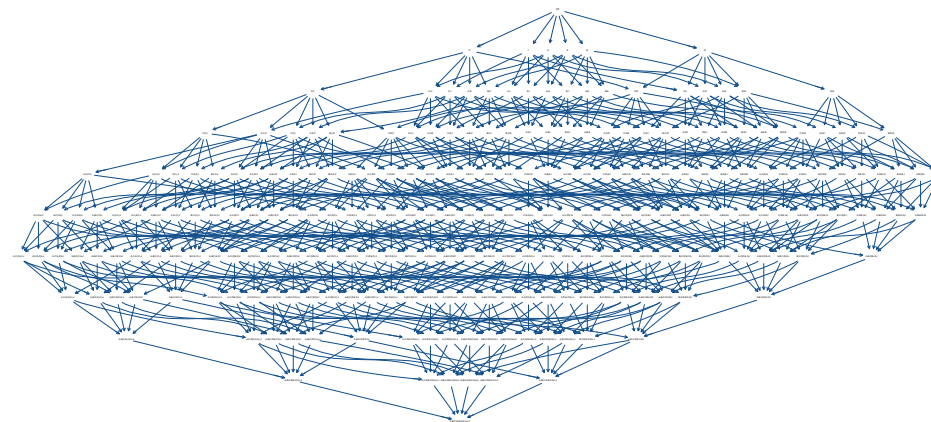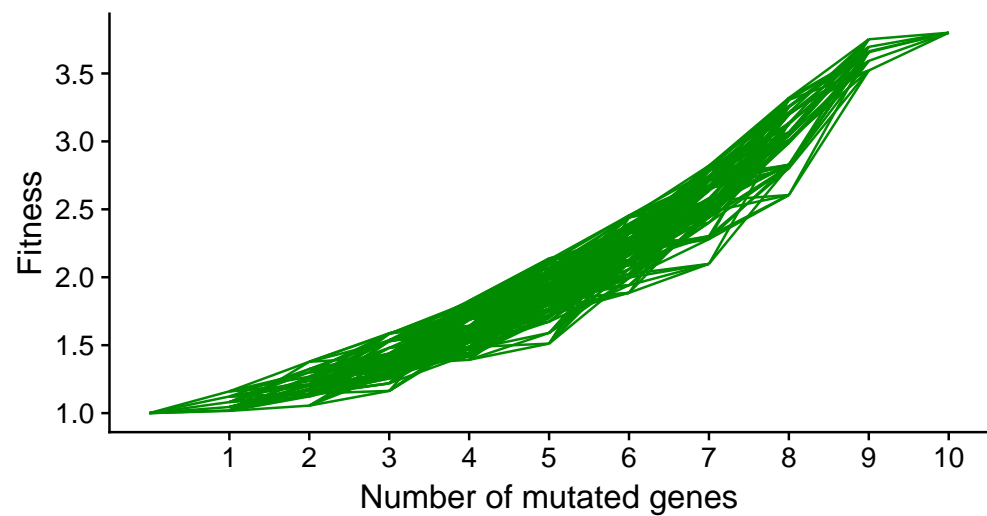



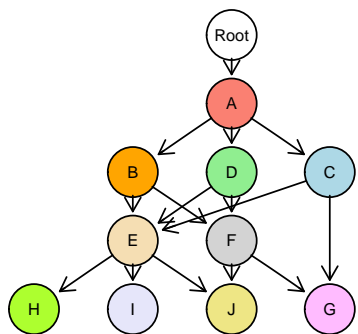

ID **z55GMs5PYH8kzvrX**  
 acc genotypes **32**  
 peaks no back 1  
 removed edges 0  
 prop rem edges 0

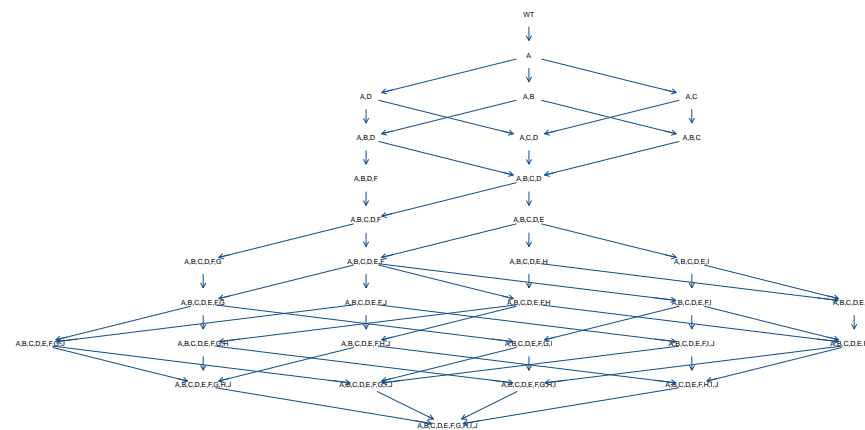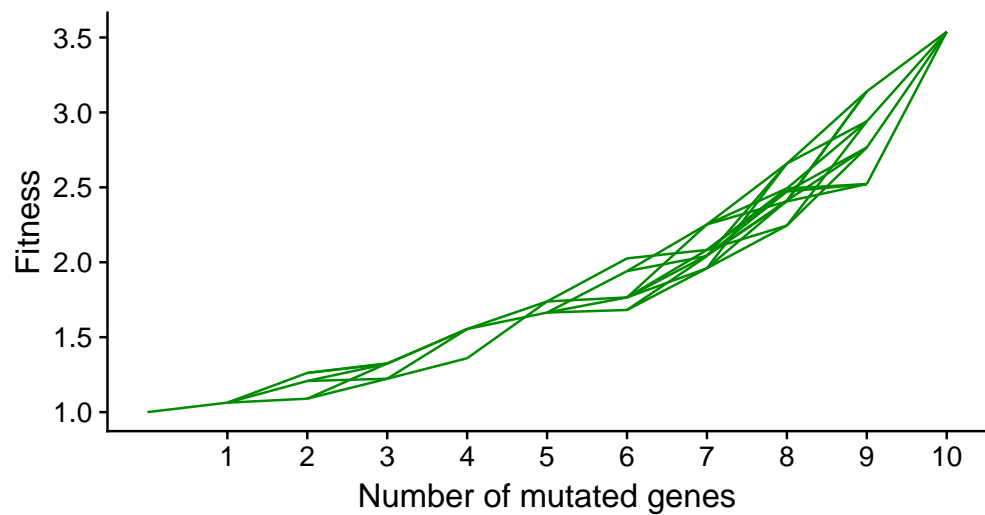

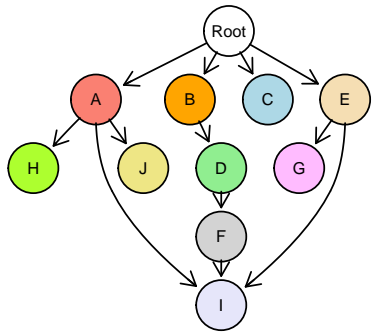

ID **ZEOZqZ8hAfpI29IT**  
 acc genotypes **136**  
 peaks no back **1**  
 removed edges **0**  
 prop rem edges **0**

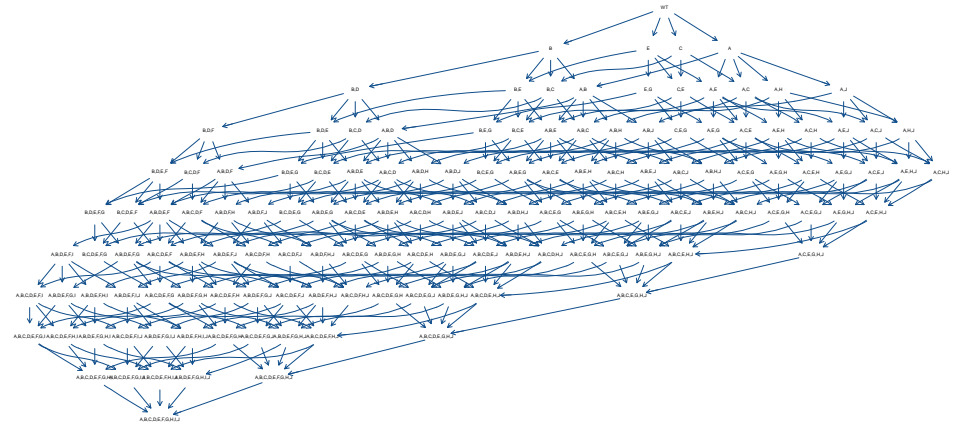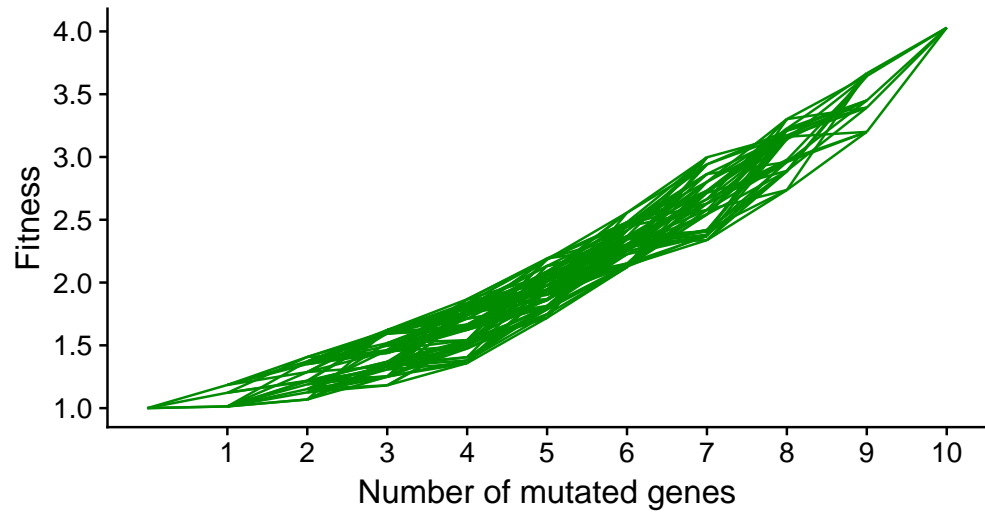

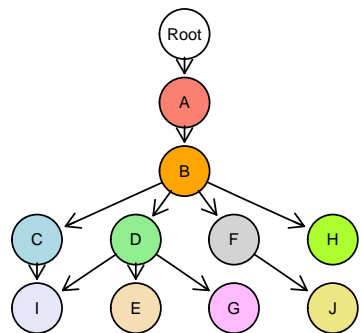

ID **zibjAEA10MPGww10fw**  
 acc genotypes **86**  
 peaks no back **1**  
 removed edges **0**  
 prop rem edges **0**

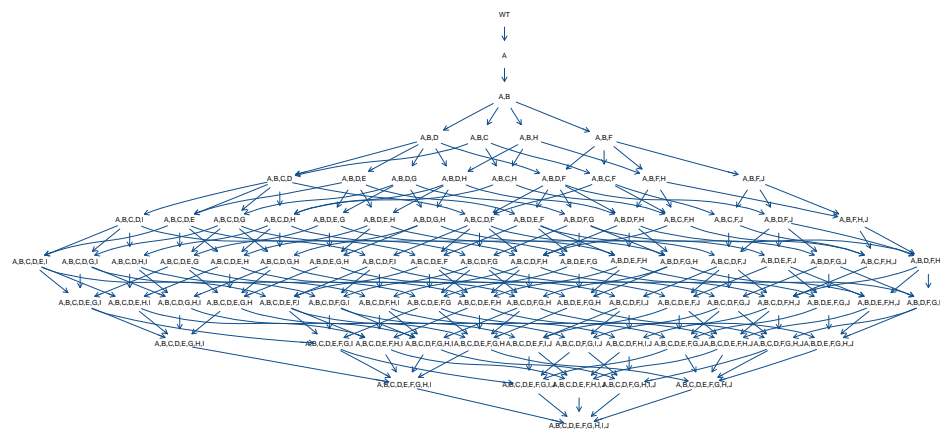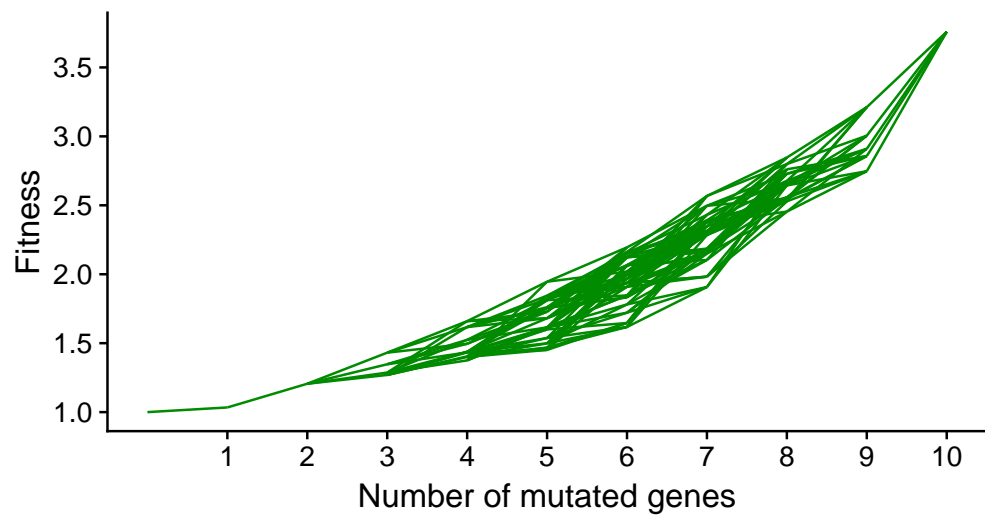

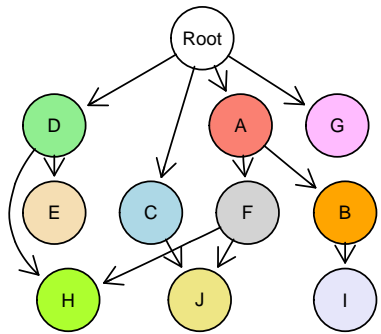

ID **zwBgTR5JXPWHn1B**  
 acc genotypes **138**  
 peaks no back 1  
 removed edges 0  
 prop rem edges 0

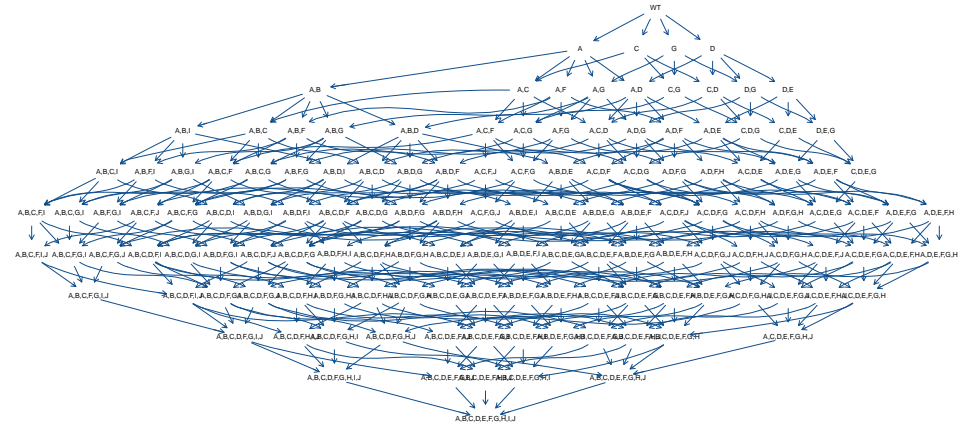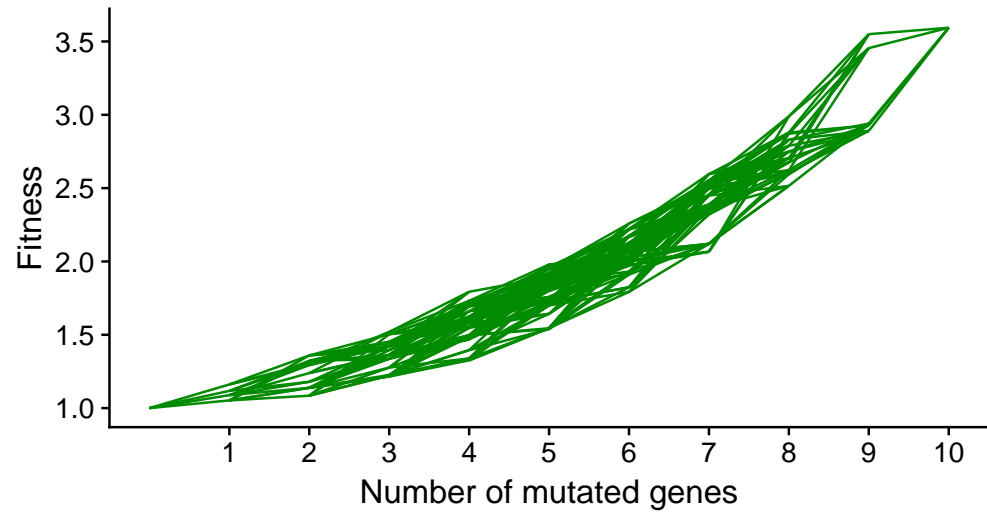

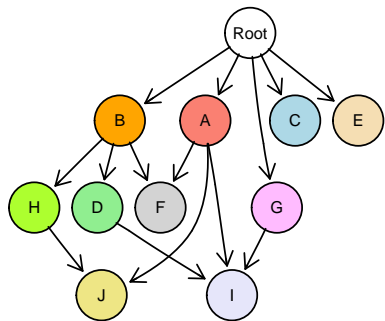

ID 1007yB4hzcMcCLW<sup>h</sup>O  
 acc genotypes 168  
 peaks no back 15  
 removed edges 123  
 prop rem edges 0.228

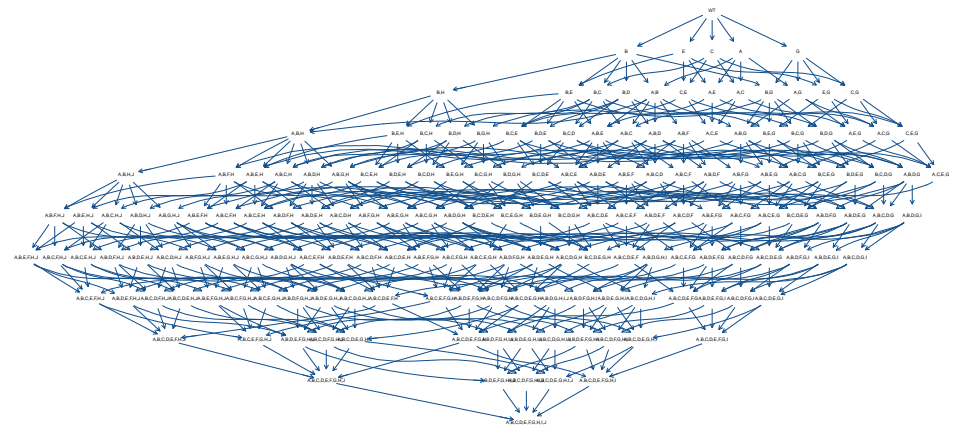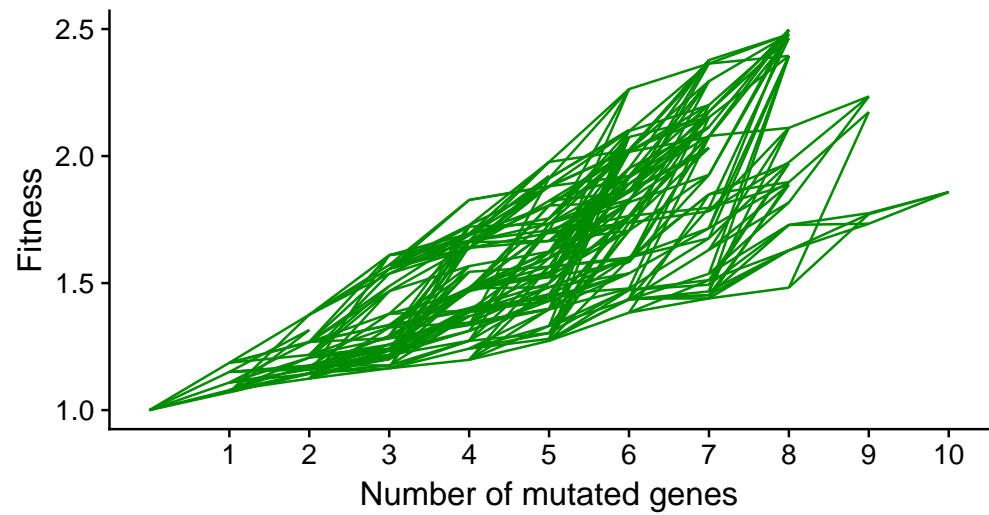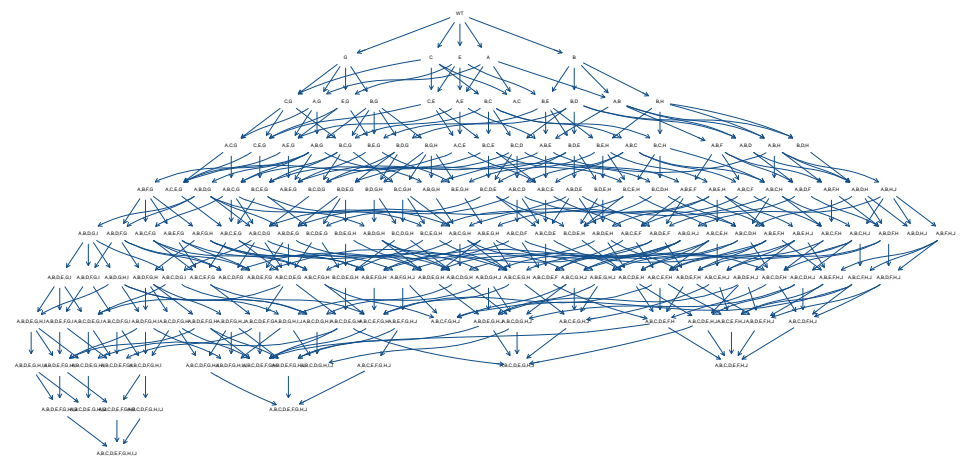

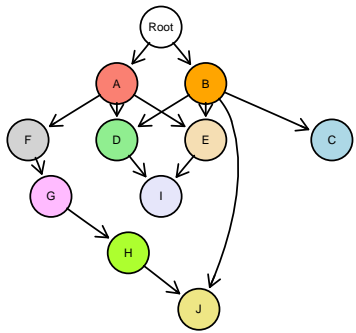

ID **1cfjEhrDN713Rg8k**  
 acc genotypes **57**  
 peaks no back **7**  
 removed edges **19**  
 prop rem edges **0.15**

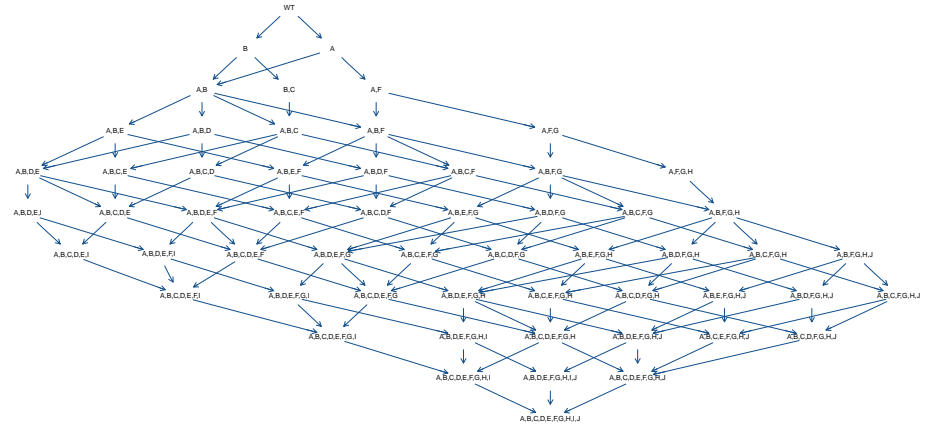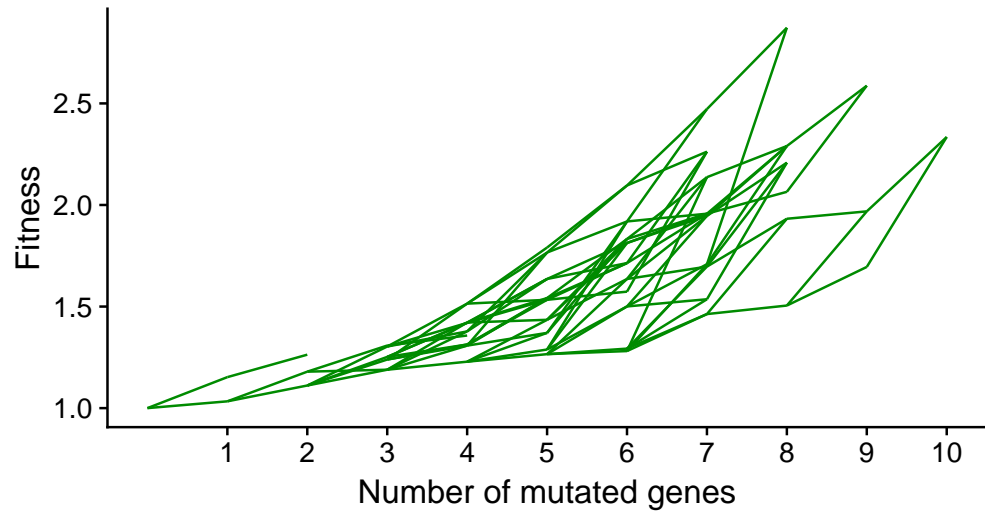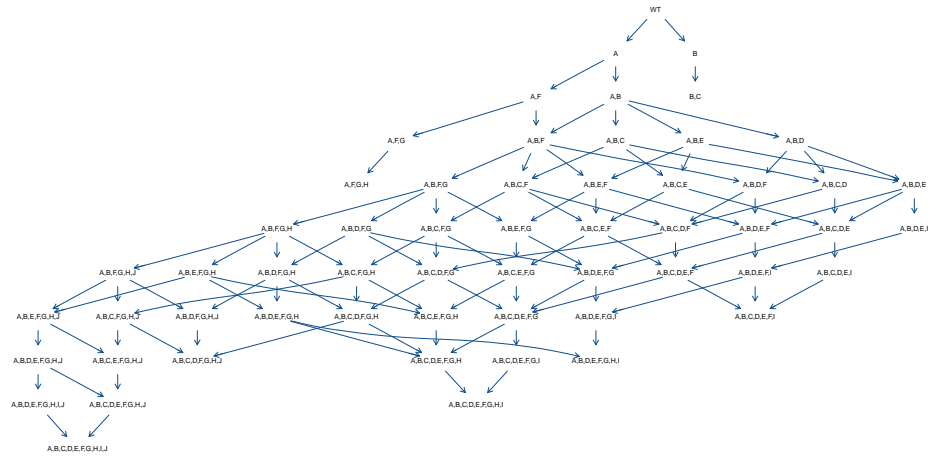

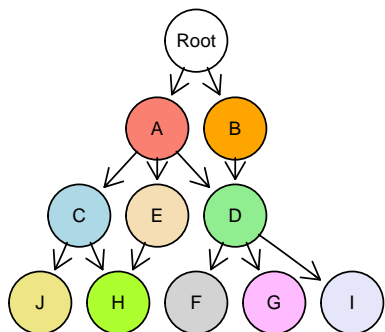

ID **1fJ9gvVlxHu10I4I**  
 acc genotypes **82**  
 peaks no back **10**  
 removed edges **36**  
 prop rem edges **0.167**

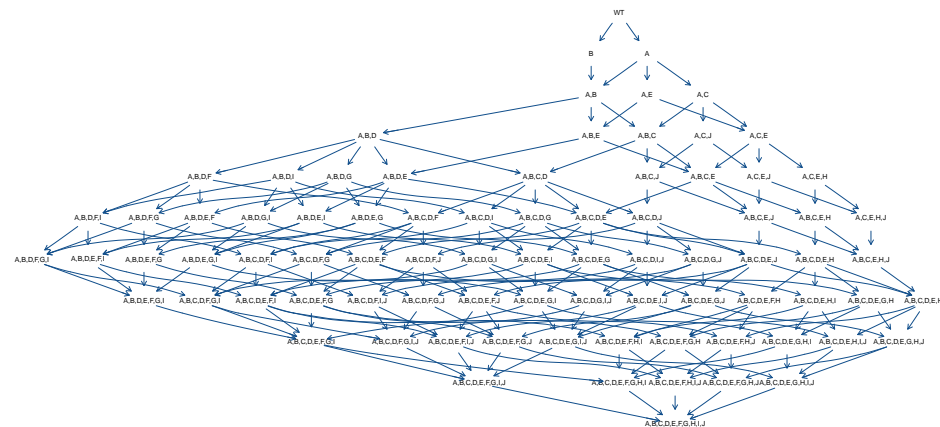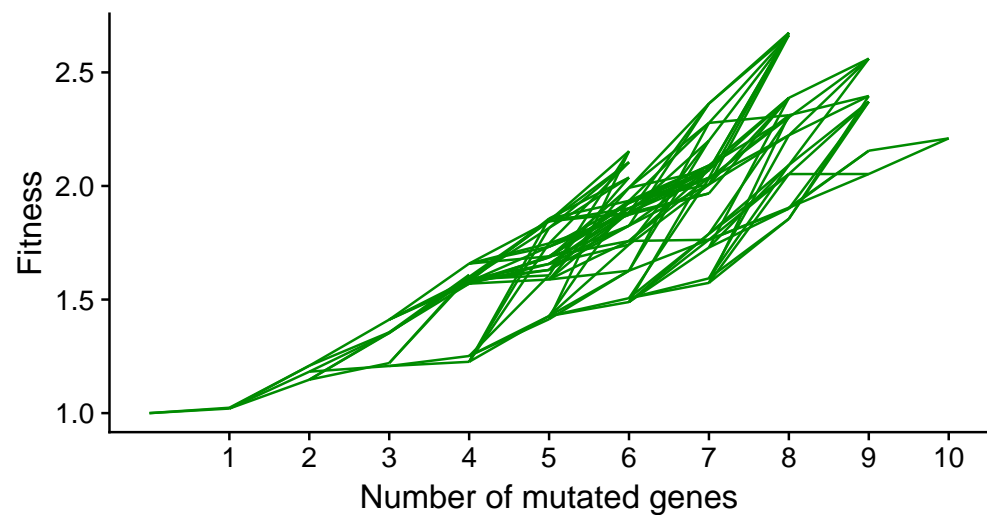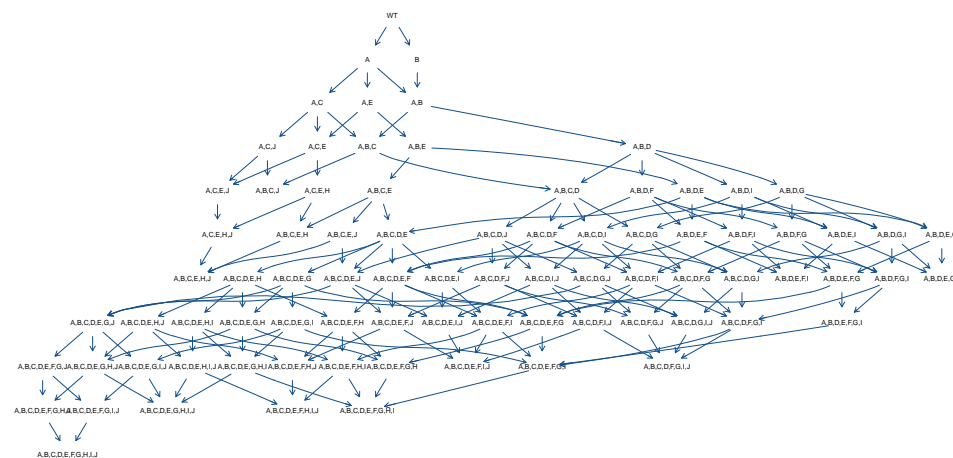

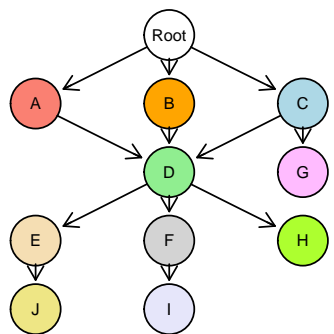

ID 1LRNI4YXQOtosQeO  
 acc genotypes 48  
 peaks no back 7  
 removed edges 20  
 prop rem edges 0.189

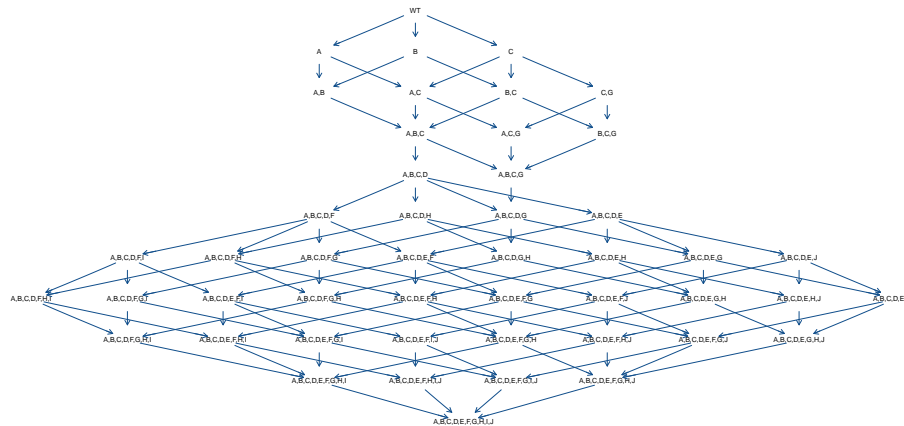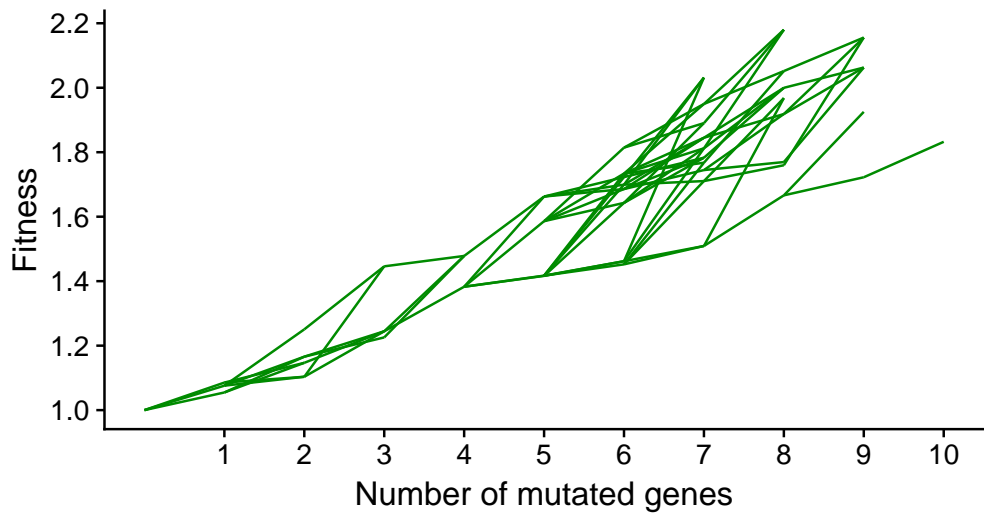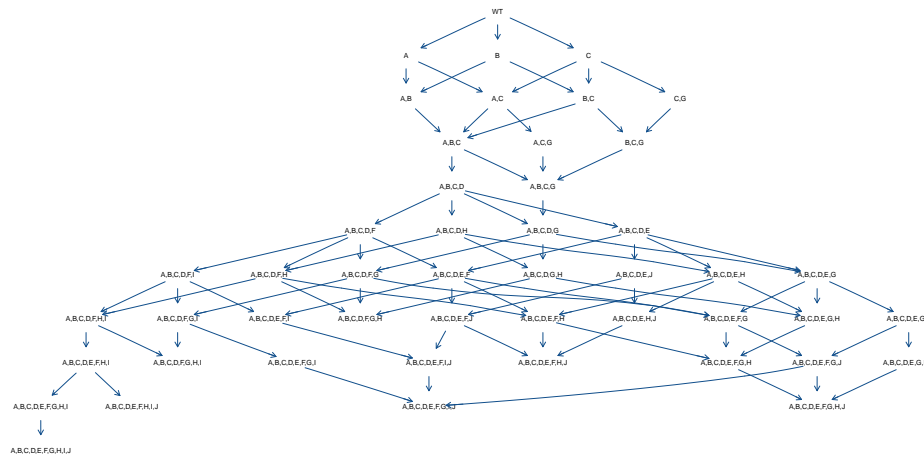



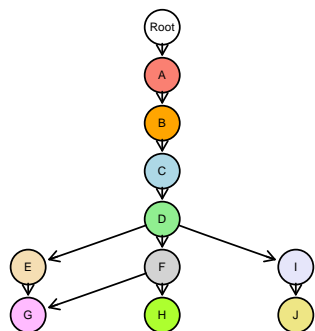

ID [24psYb2Z5uoeEiGL](#)  
 acc genotypes 28  
 peaks no back 5  
 removed edges 9  
 prop rem edges 0.18

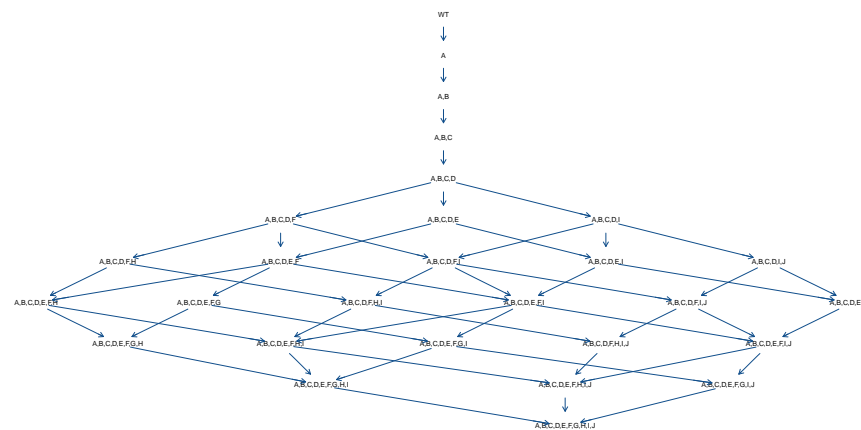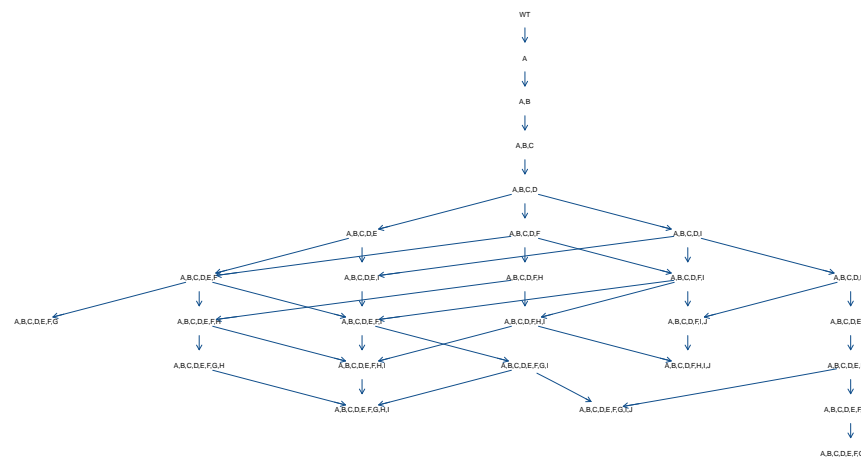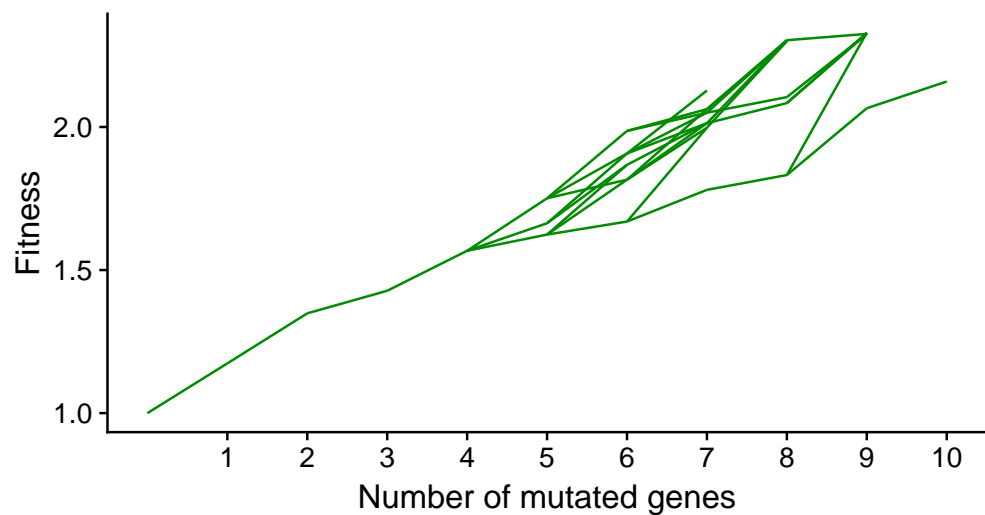

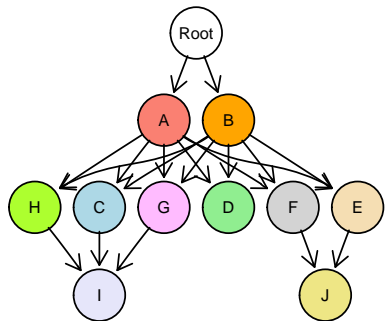

ID **26j4DR9Ab9swRweC**  
 acc genotypes **93**  
 peaks no back **10**  
 removed edges **40**  
 prop rem edges **0.149**

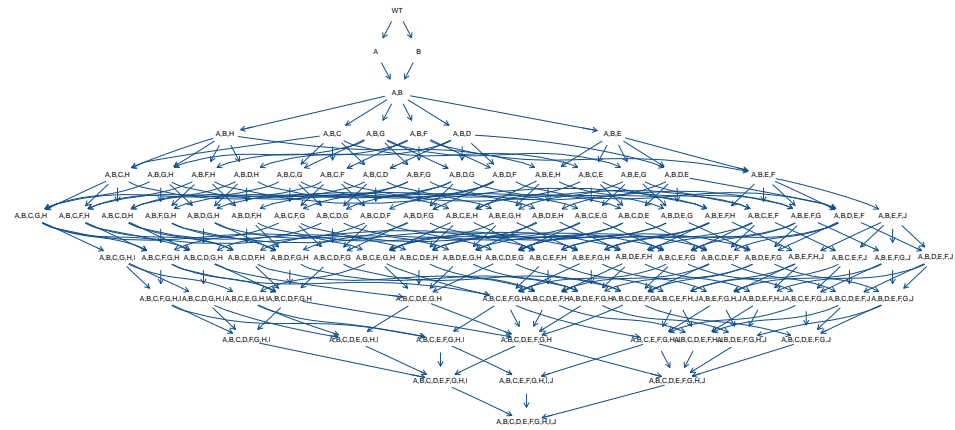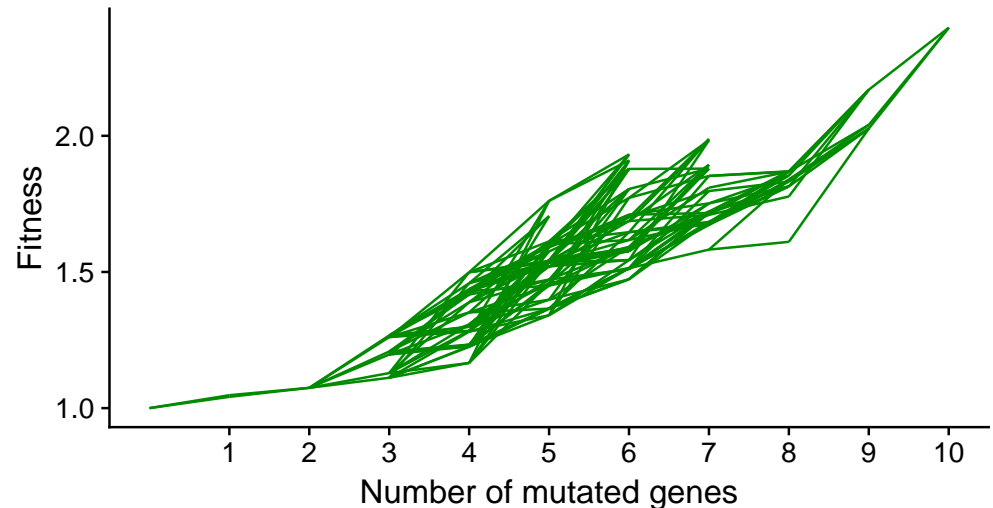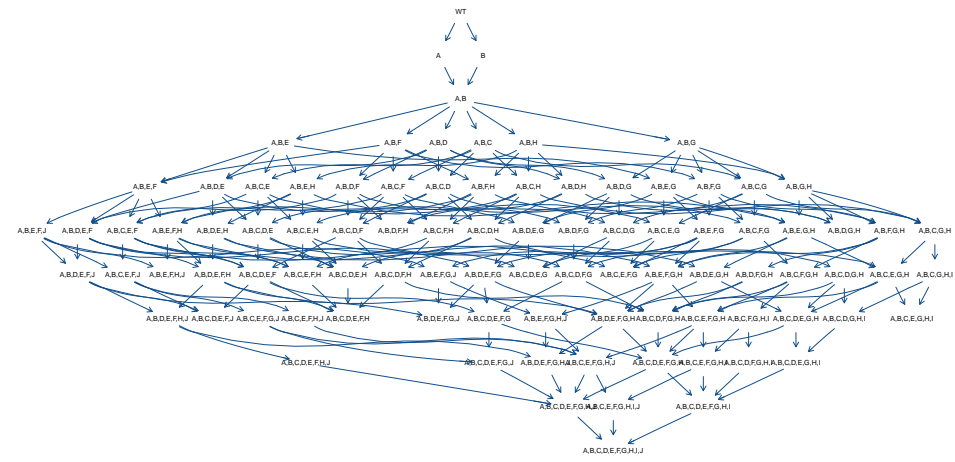

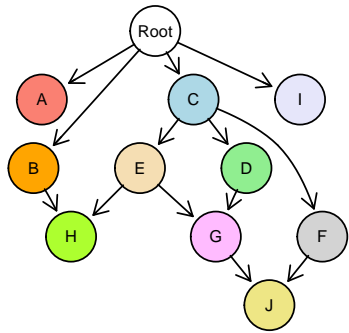

ID 29J8aMCesoGoSpvM  
 acc genotypes 124  
 peaks no back 10  
 removed edges 55  
 prop rem edges 0.149

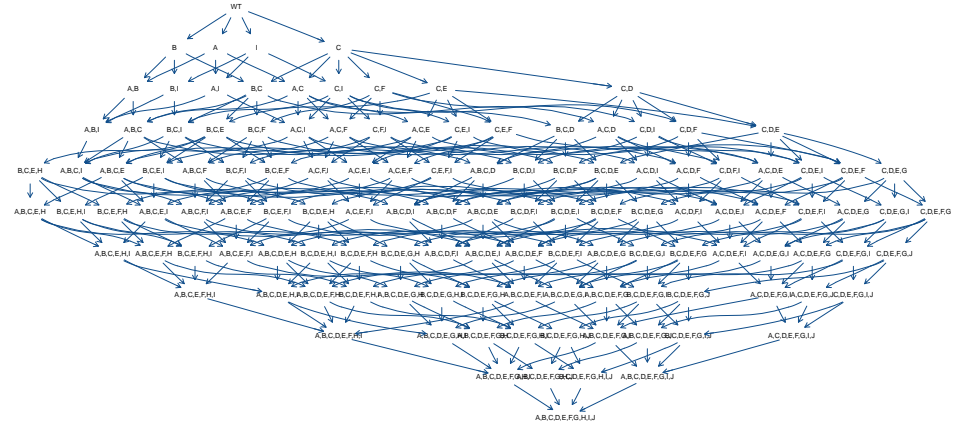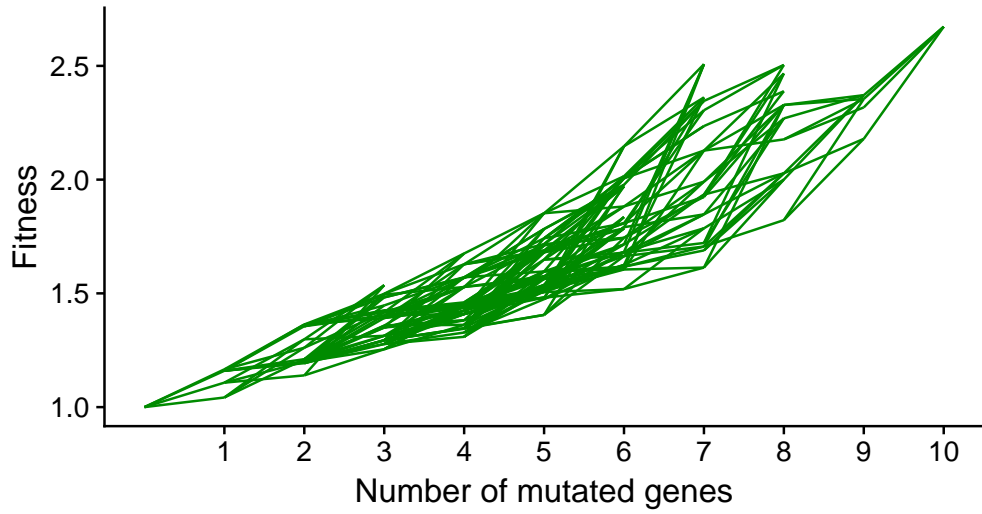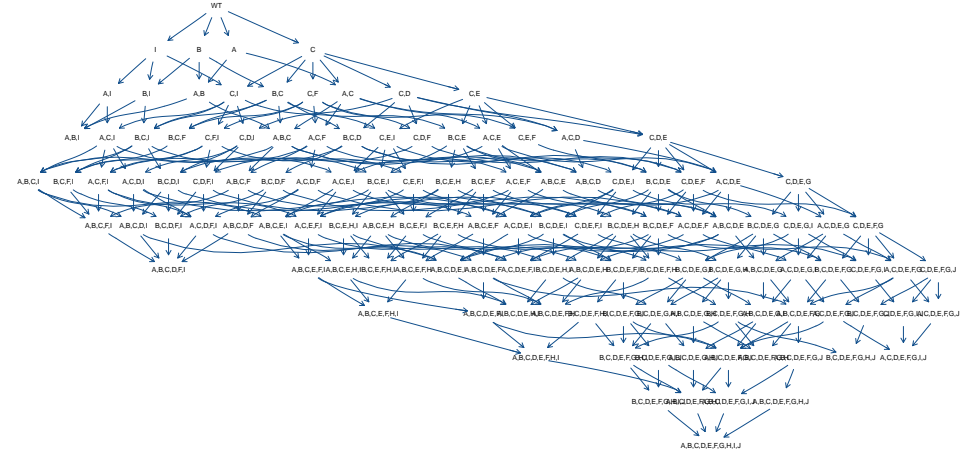

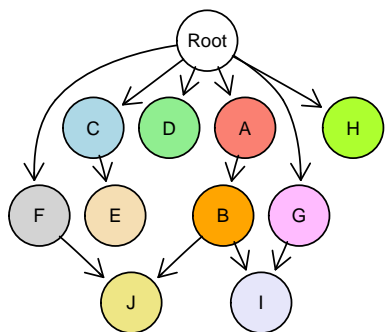

ID **2e8NW3WSIIdSHqm**  
 acc genotypes **204**  
 peaks no back **16**  
 removed edges **139**  
 prop rem edges **0.206**

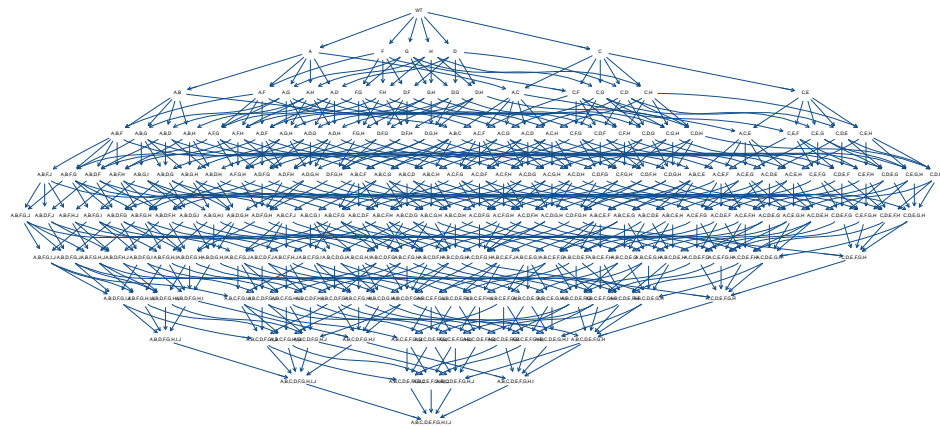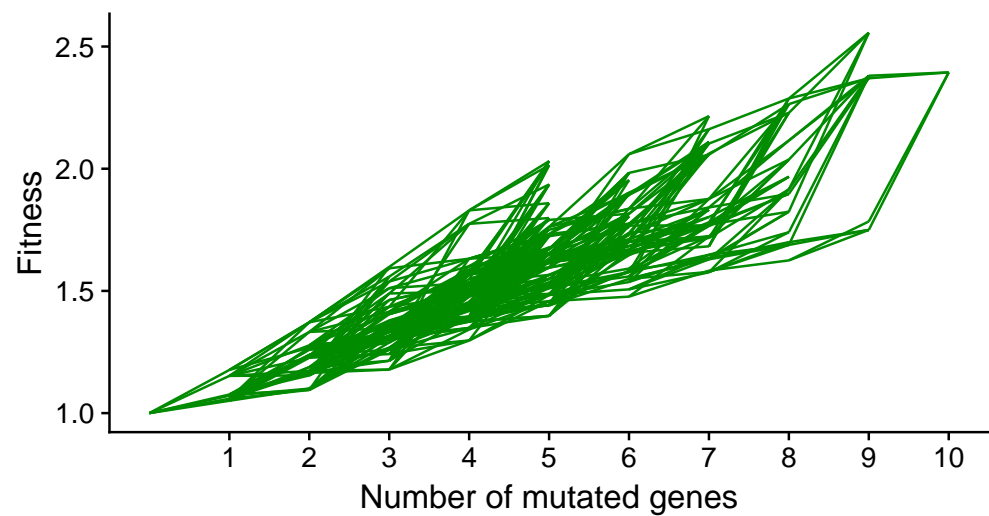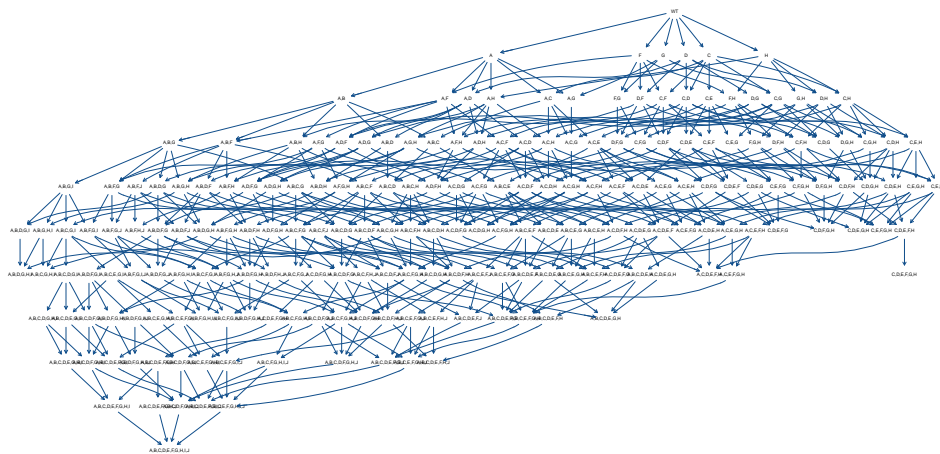

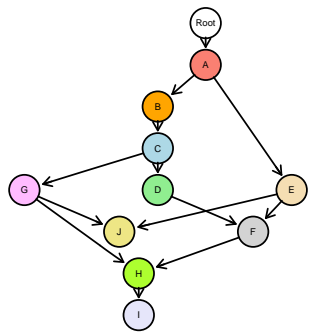

ID 2NKDNCMNshVULJ2E  
 acc genotypes 22  
 peaks no back 2  
 removed edges 3  
 prop rem edges 0.091

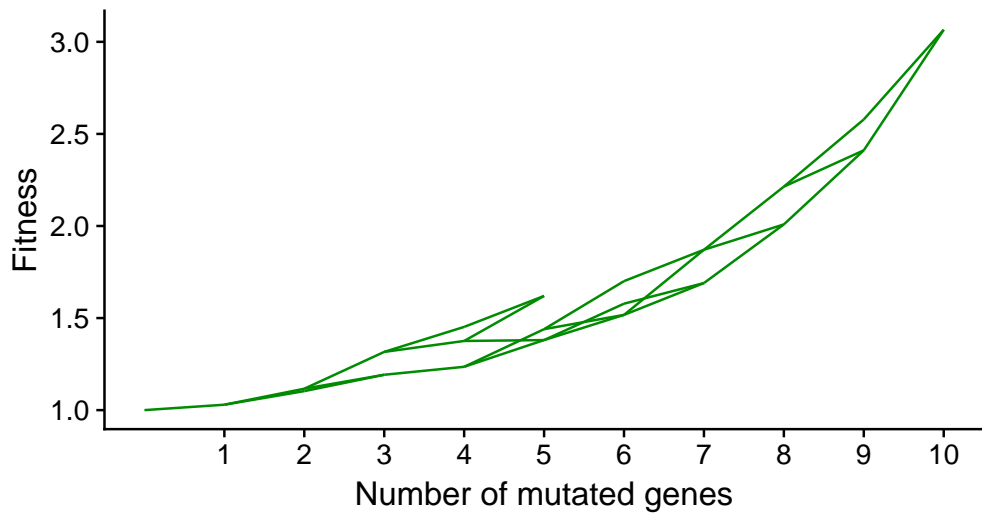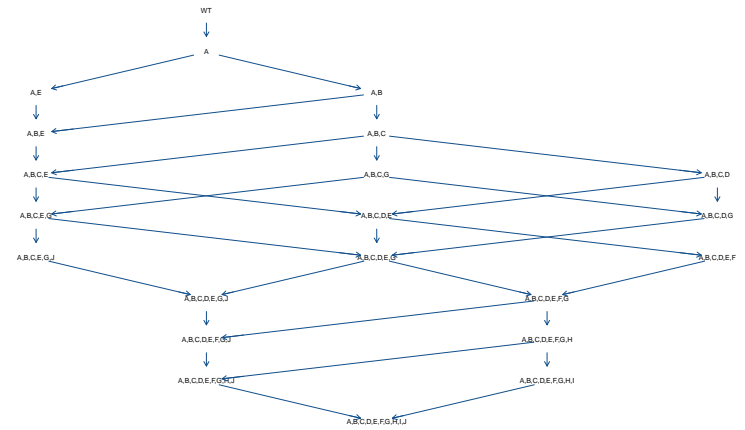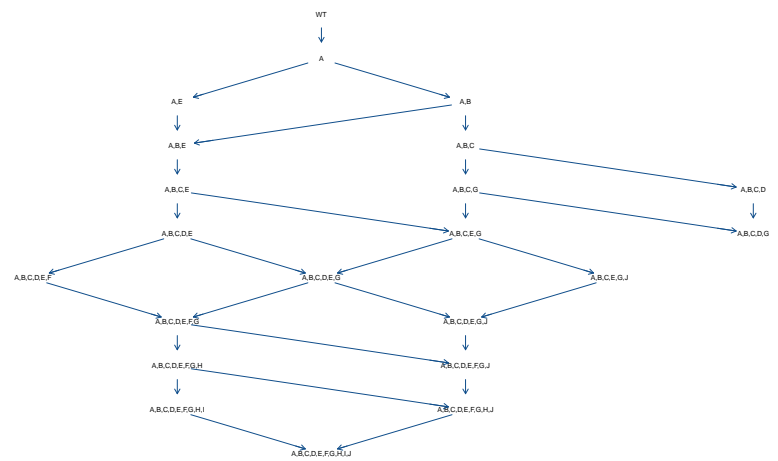

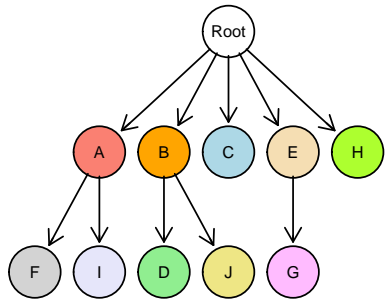

*ID* 2fi105XmgduWICPHP  
*acc genotypes* 300  
*peaks no back* 24  
*removed edges* 245  
*prop rem edges* 0.223

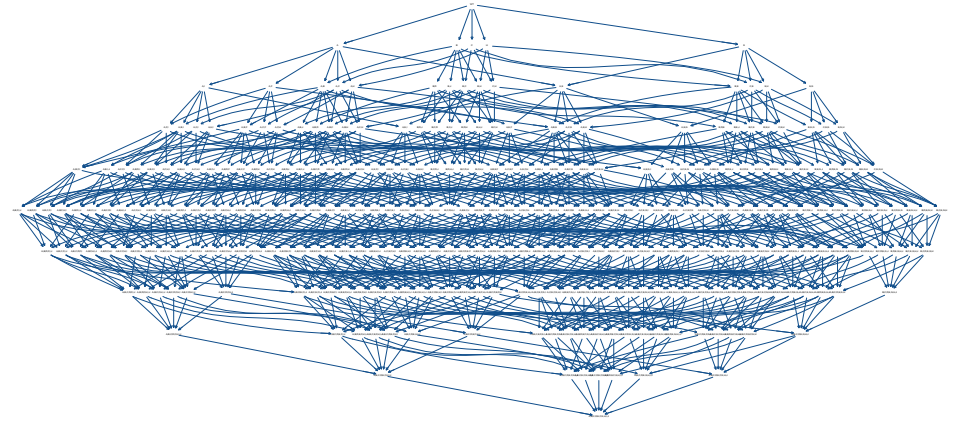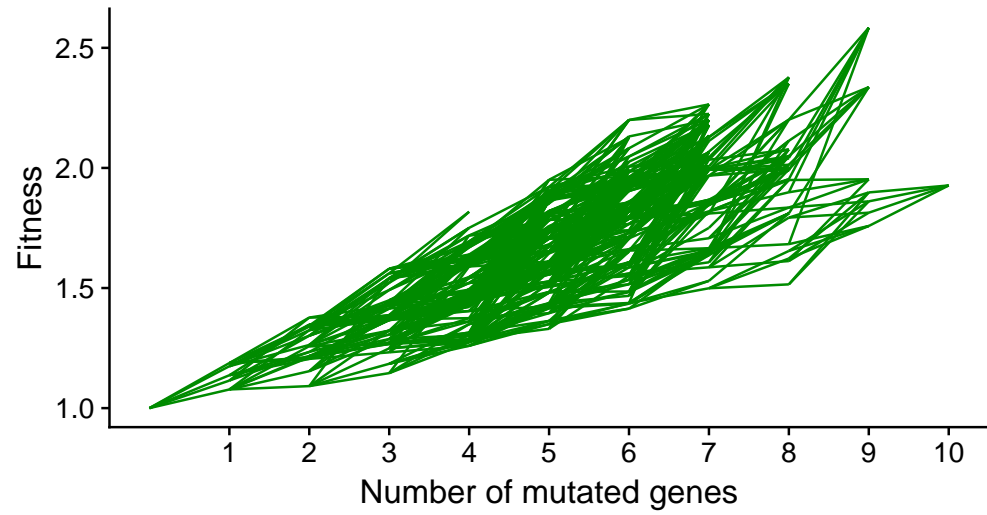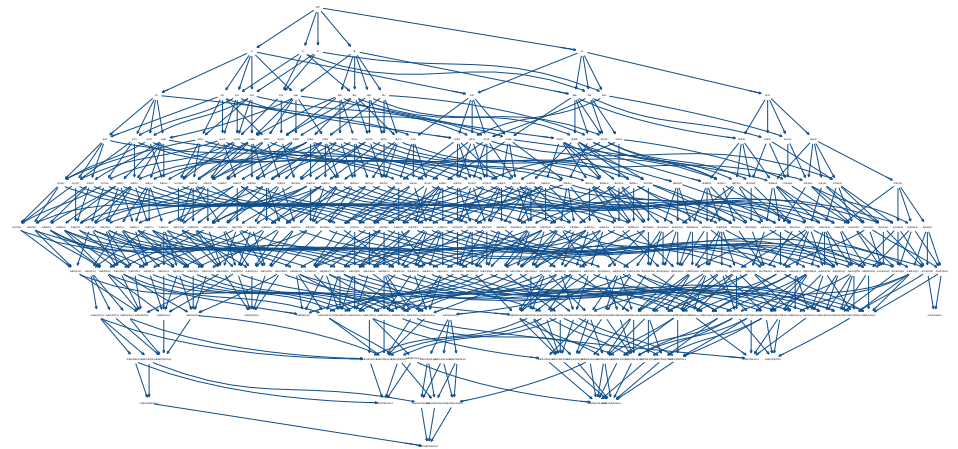

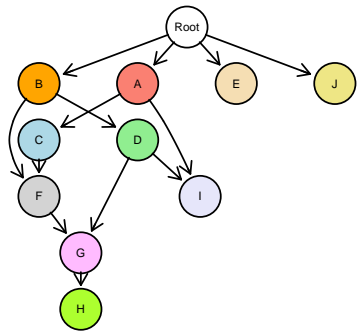

ID 3a7jMZPzBxEpCMra  
 acc genotypes 72  
 peaks no back 11  
 removed edges 42  
 prop rem edges 0.239

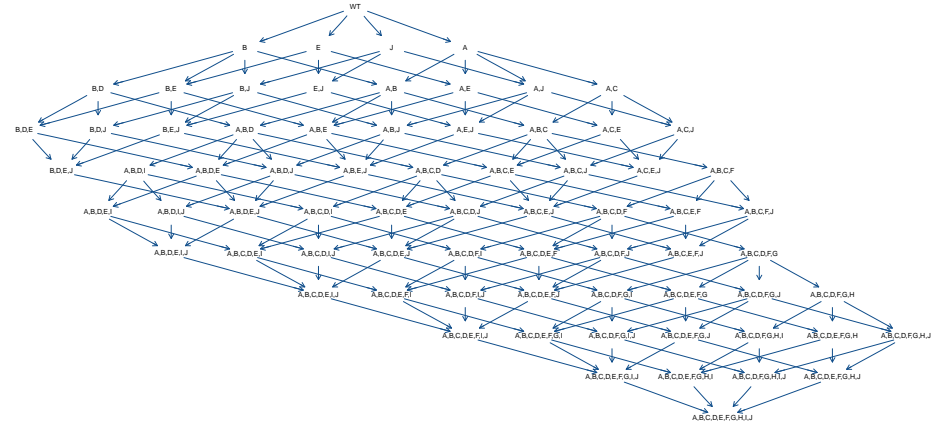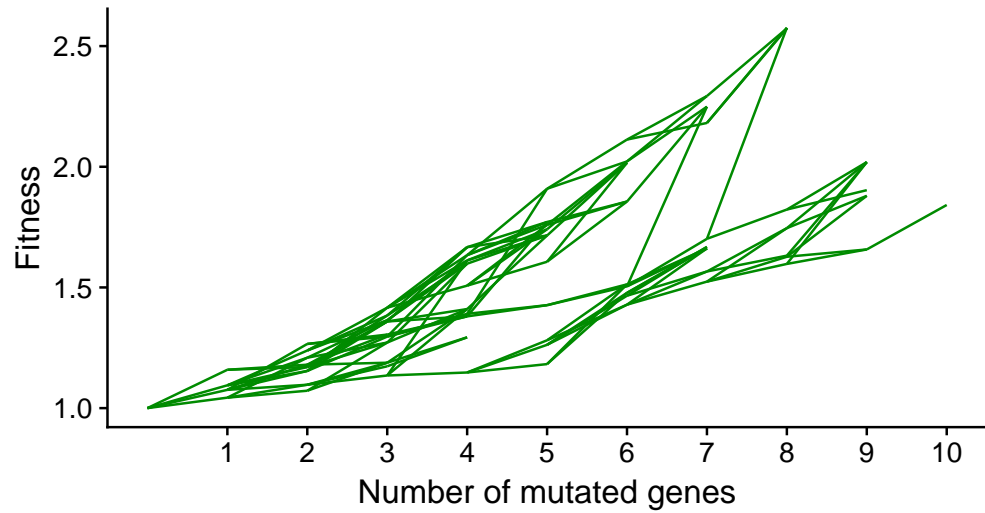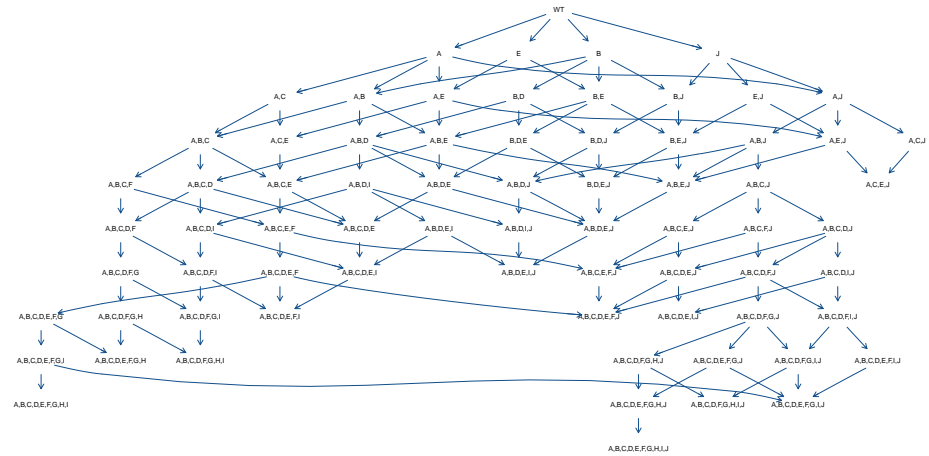

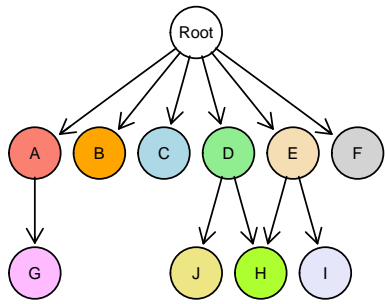

ID 46TSoH89nM3Ac4Jd  
 acc genotypes 312  
 peaks no back 23  
 removed edges 210  
 prop rem edges 0.182

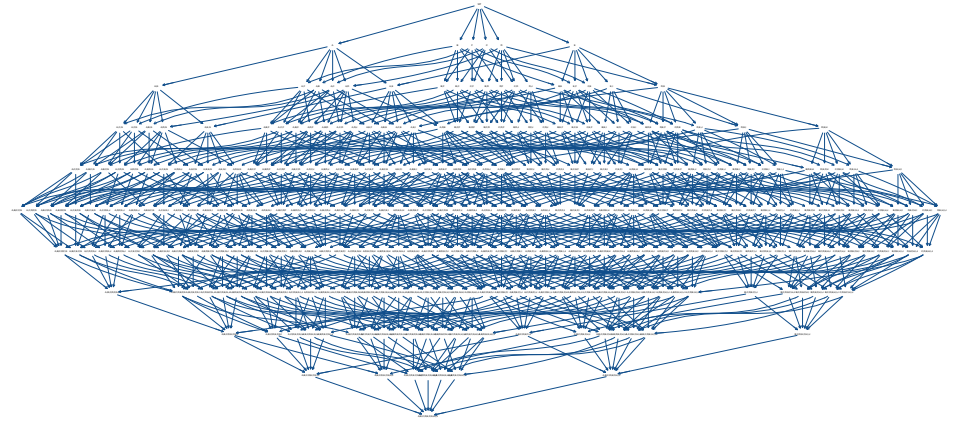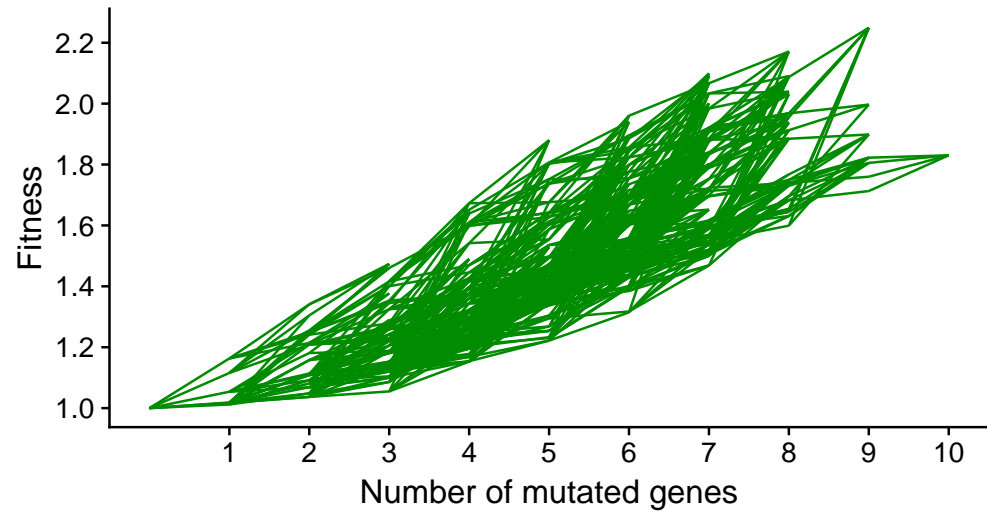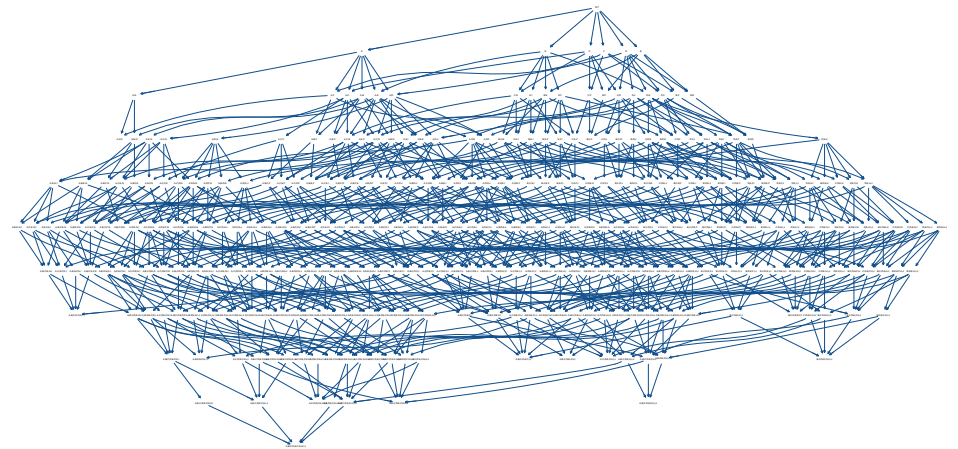



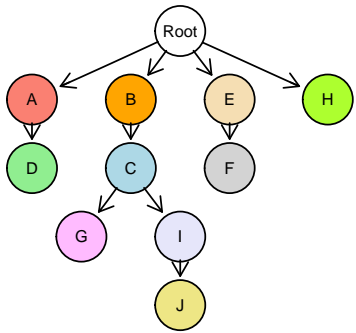

ID **4KWL9eg4fUjg1ndt**  
 acc genotypes **144**  
 peaks no back 15  
 removed edges 97  
 prop rem edges 0.228

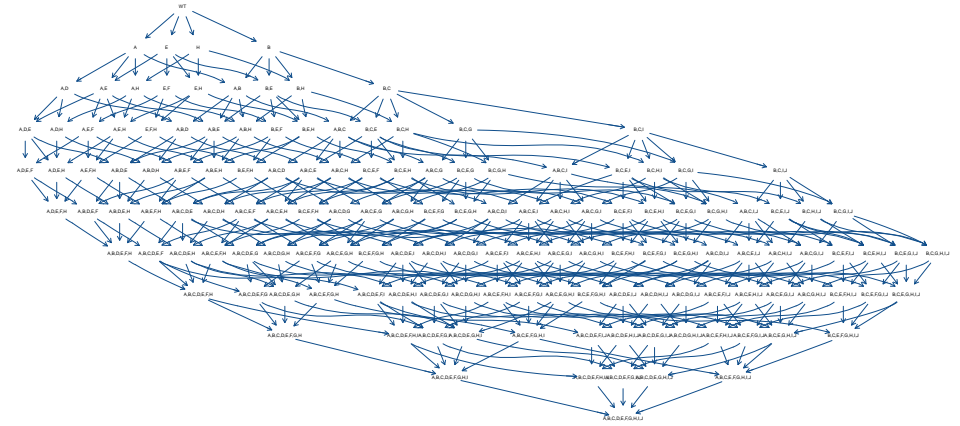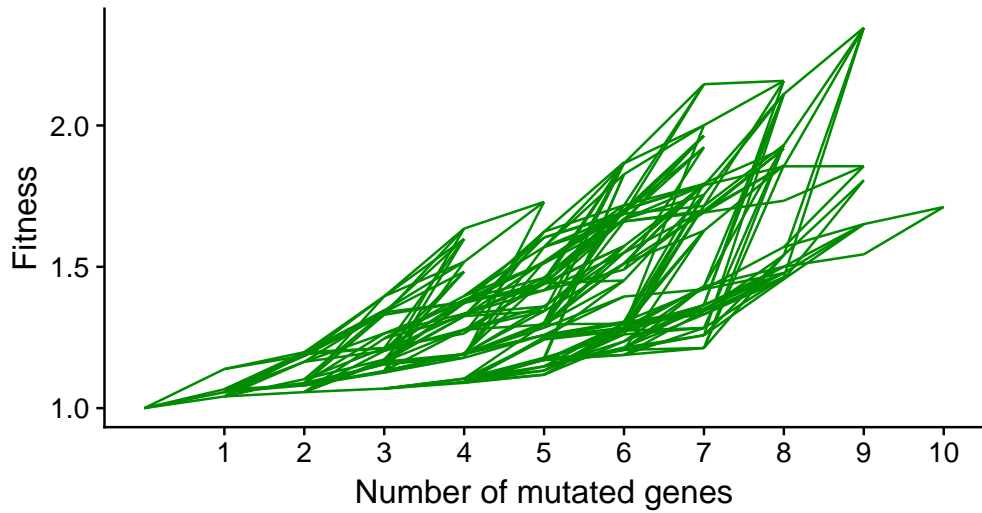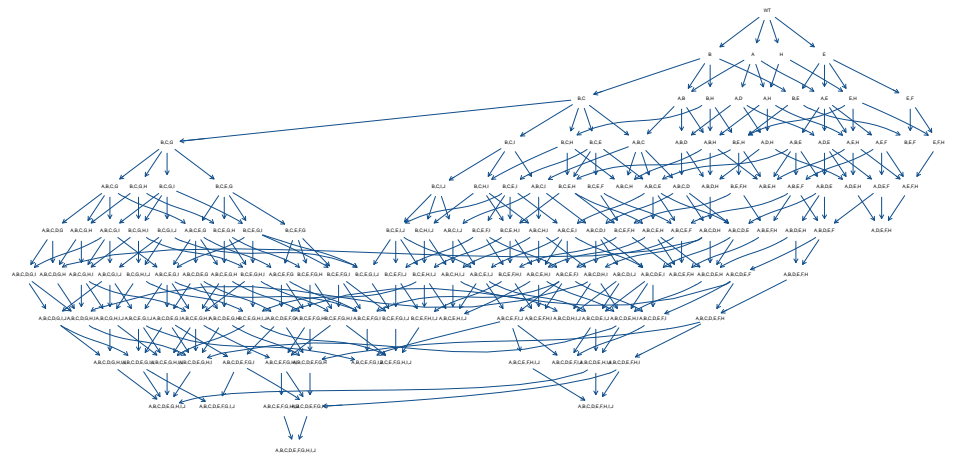

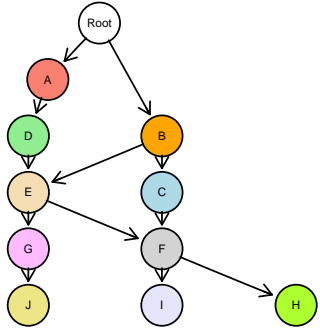

ID 4r7diBoGWUyNOWMY  
 acc genotypes 27  
 peaks no back 5  
 removed edges 6  
 prop rem edges 0.136

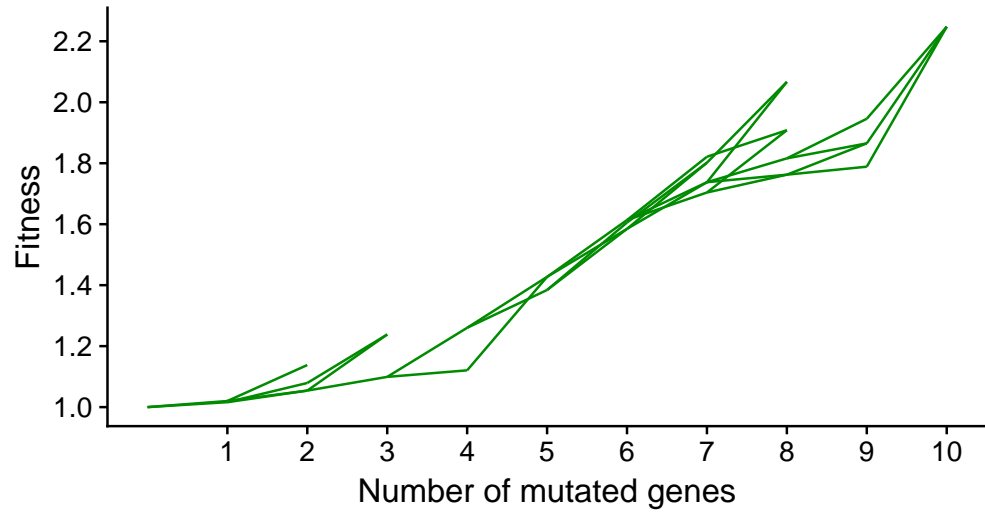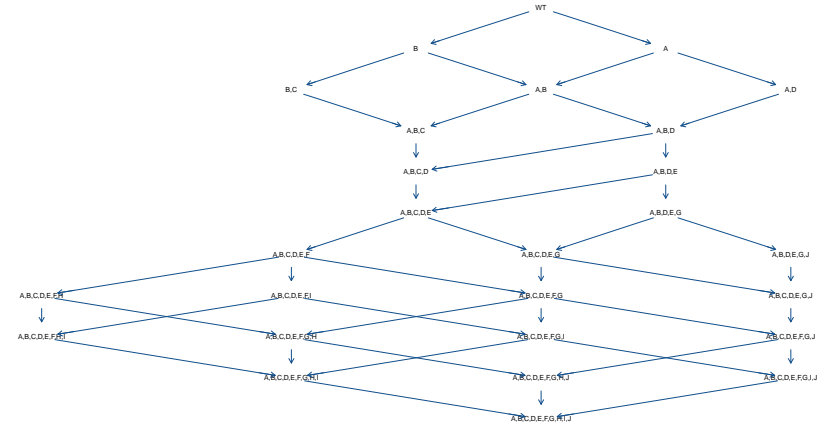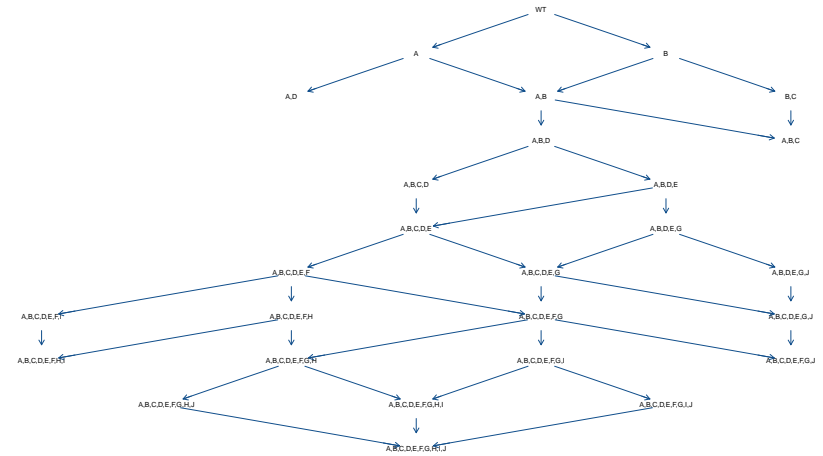

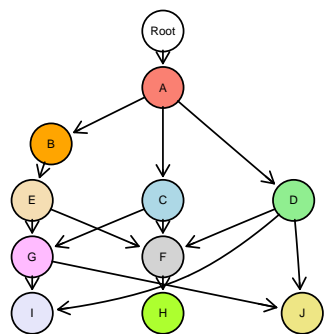

ID **56zMgtzUdnUxiwN9**  
 acc genotypes **28**  
 peaks no back **6**  
 removed edges **8**  
 prop rem edges **0.167**

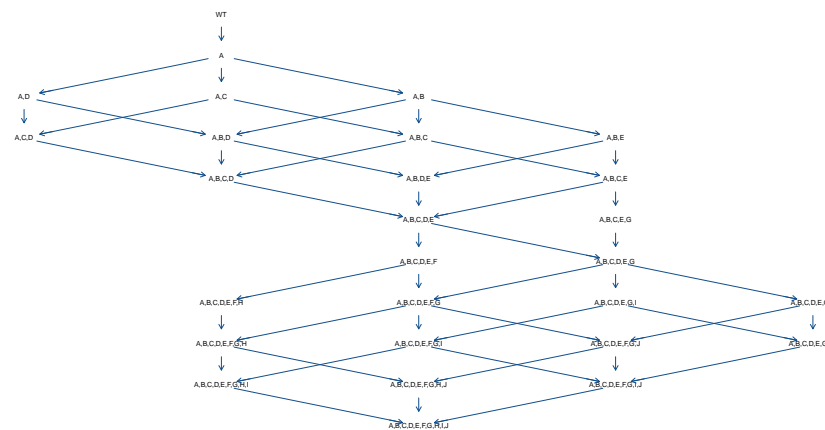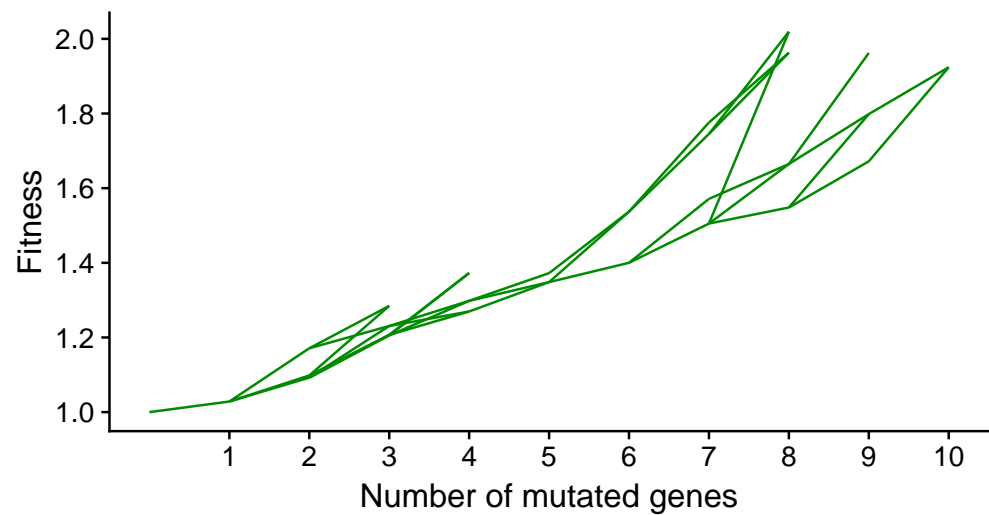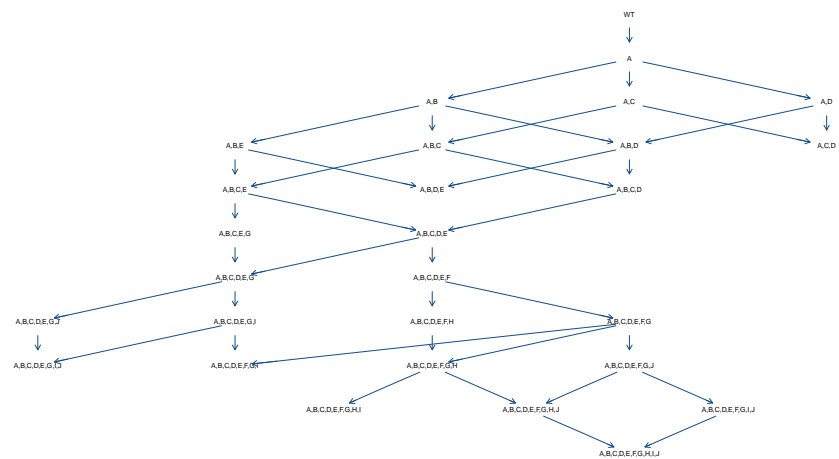

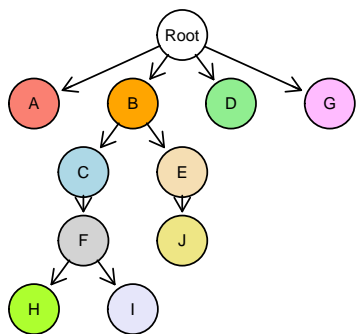

ID 5D4EKkcfVoj4fHS  
 acc genotypes 152  
 peaks no back 14  
 removed edges 94  
 prop rem edges 0.197

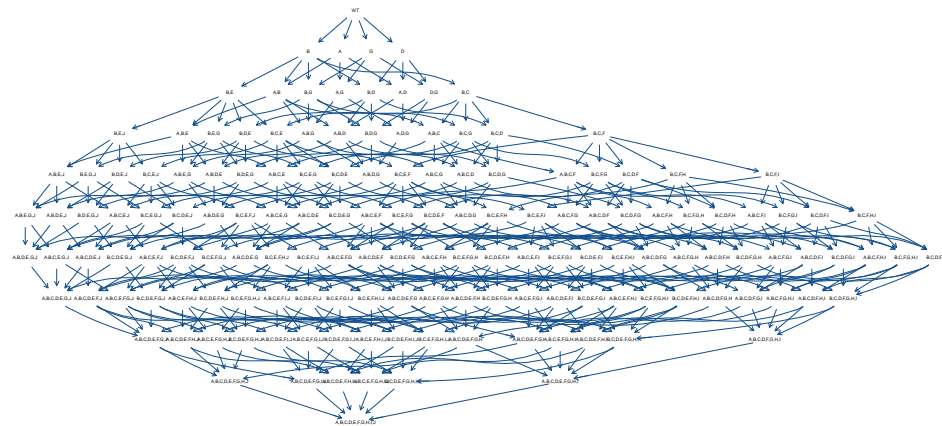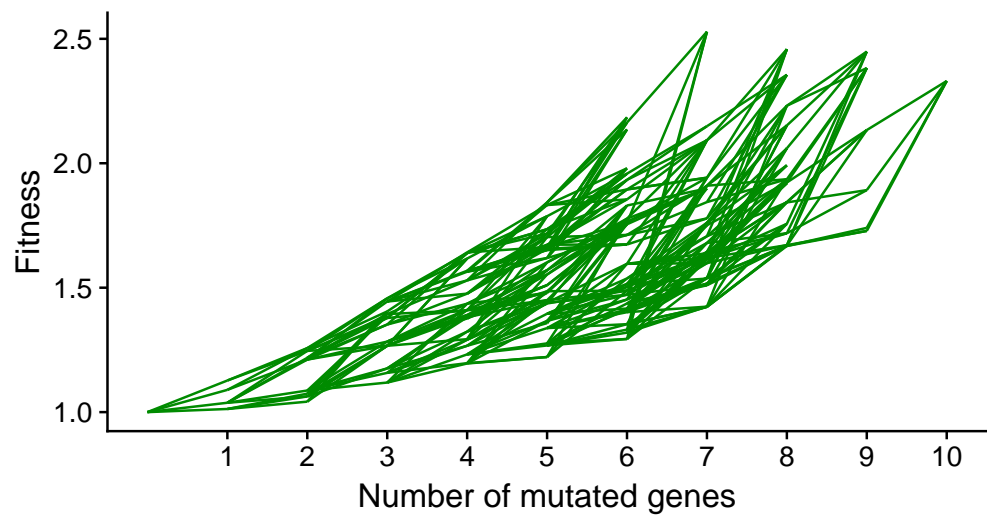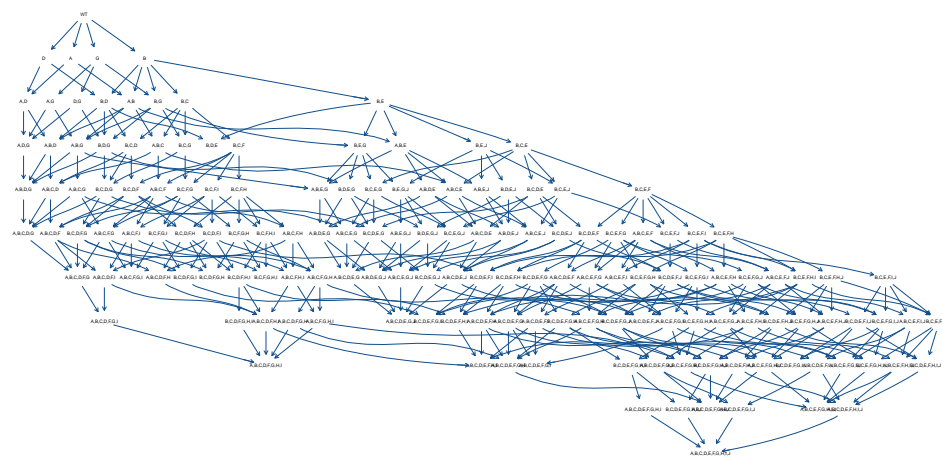

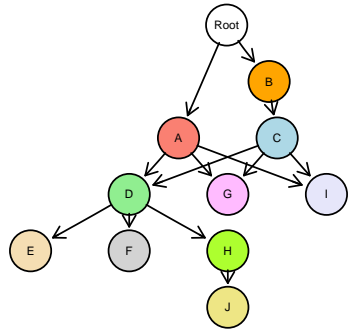

ID 5DSInm8xyZVZ5wT9  
 acc genotypes 57  
 peaks no back 8  
 removed edges 20  
 prop rem edges 0.14

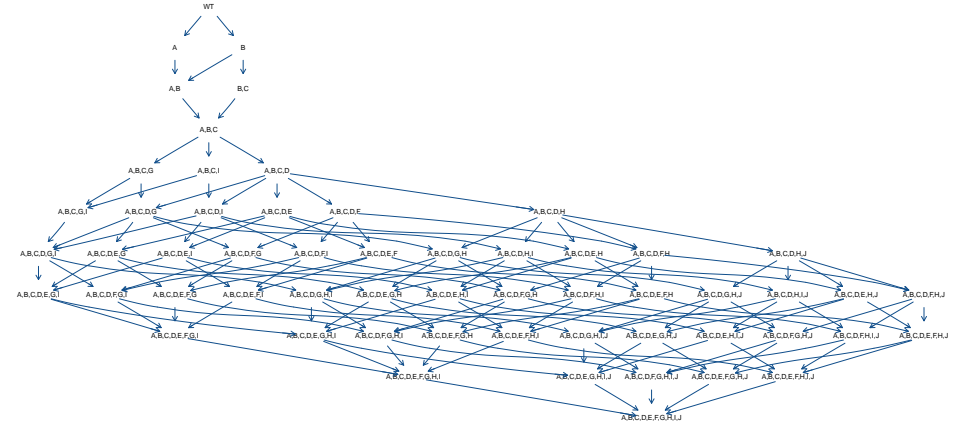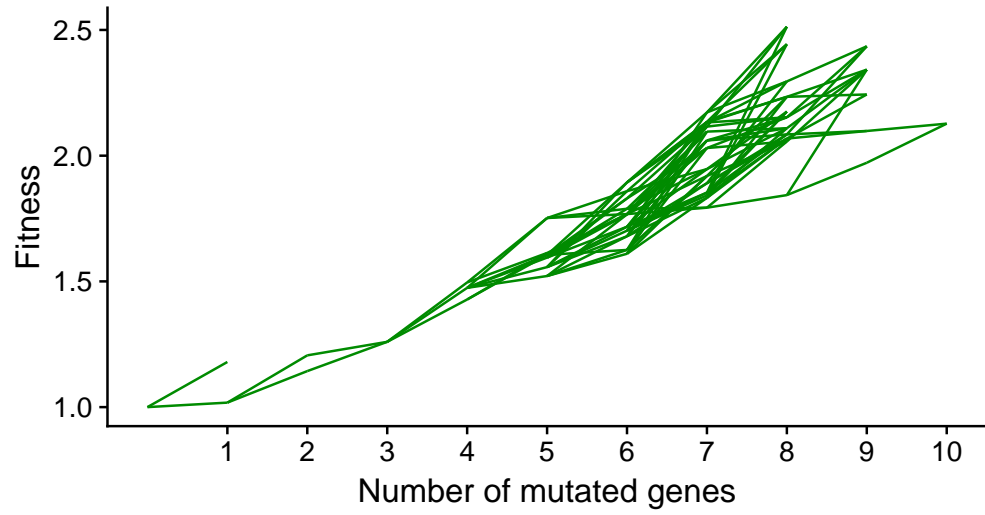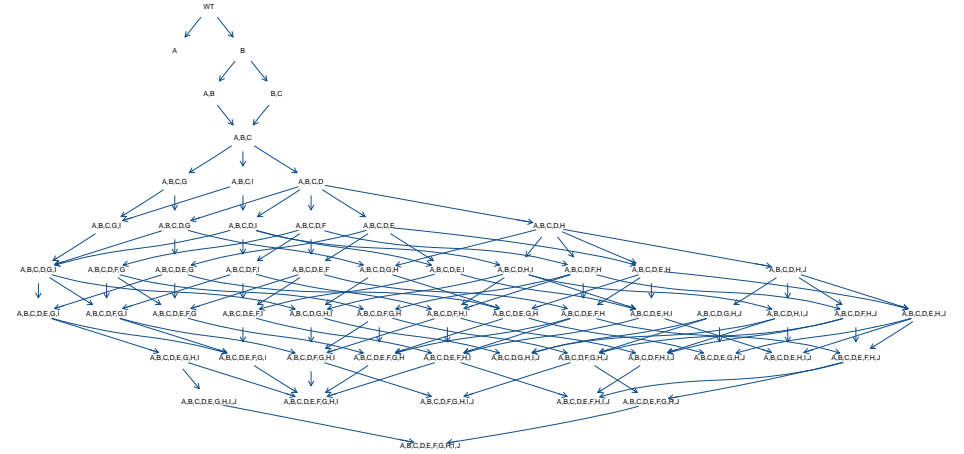

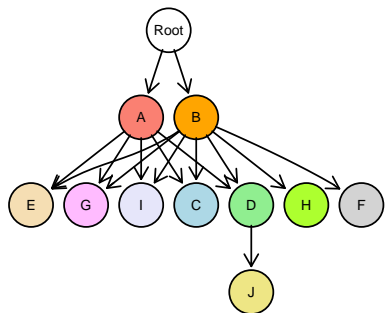

ID 5ervwavRLQyVUmM4  
 acc genotypes 198  
 peaks no back 19  
 removed edges 124  
 prop rem edges 0.173

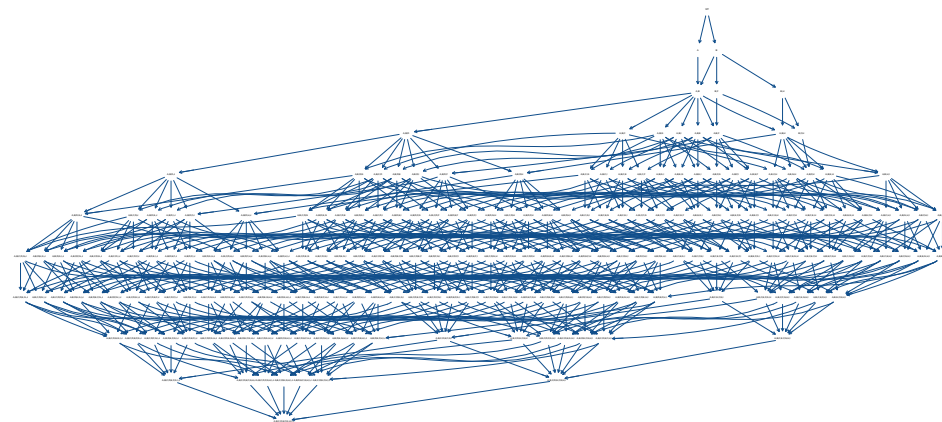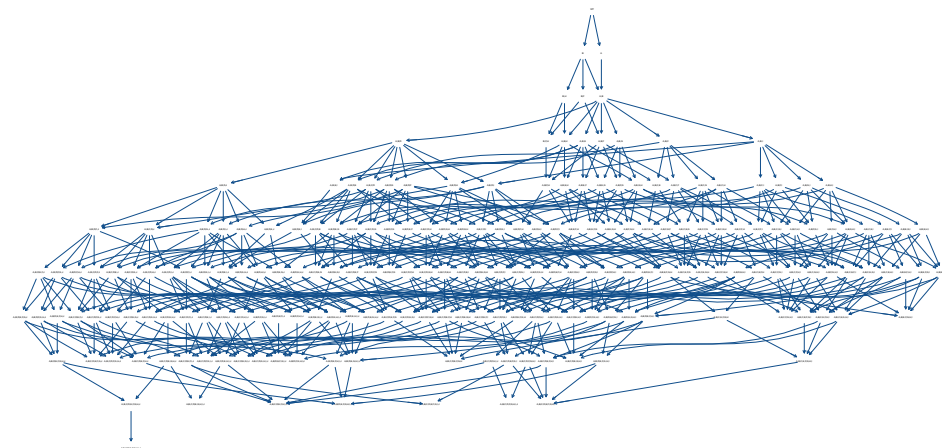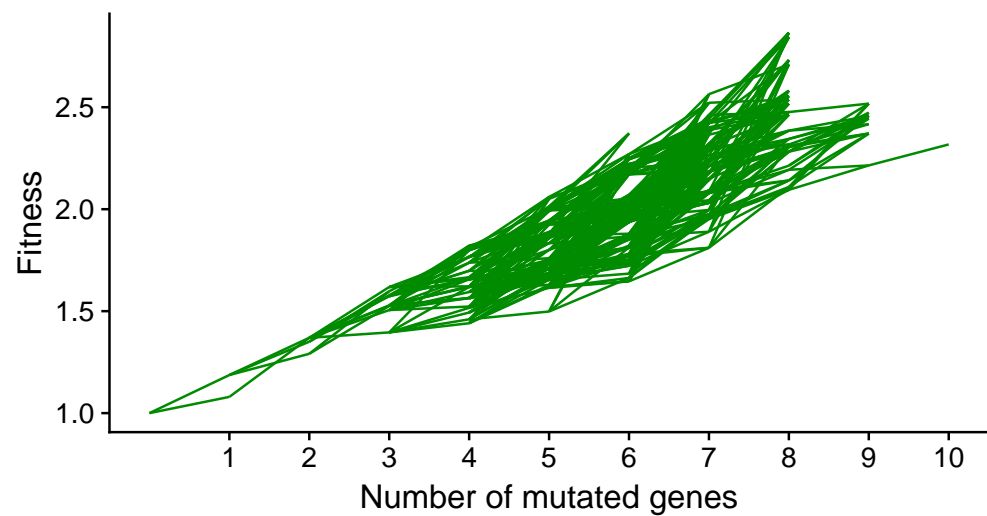

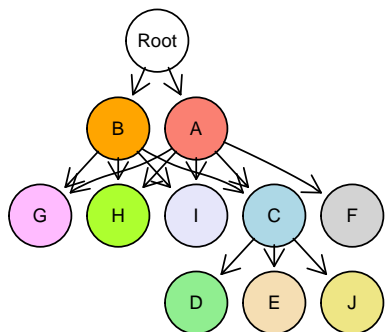

ID 5Kk3ENaa6v1KQQvo  
 acc genotypes 148  
 peaks no back 18  
 removed edges 100  
 prop rem edges 0.199

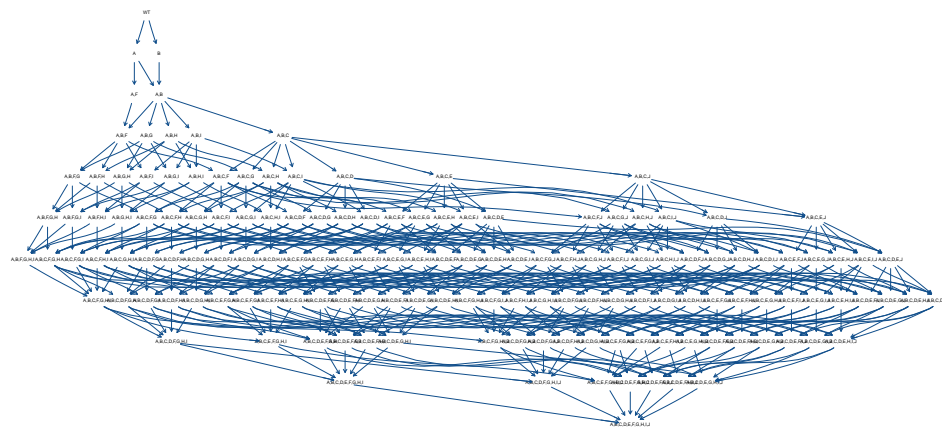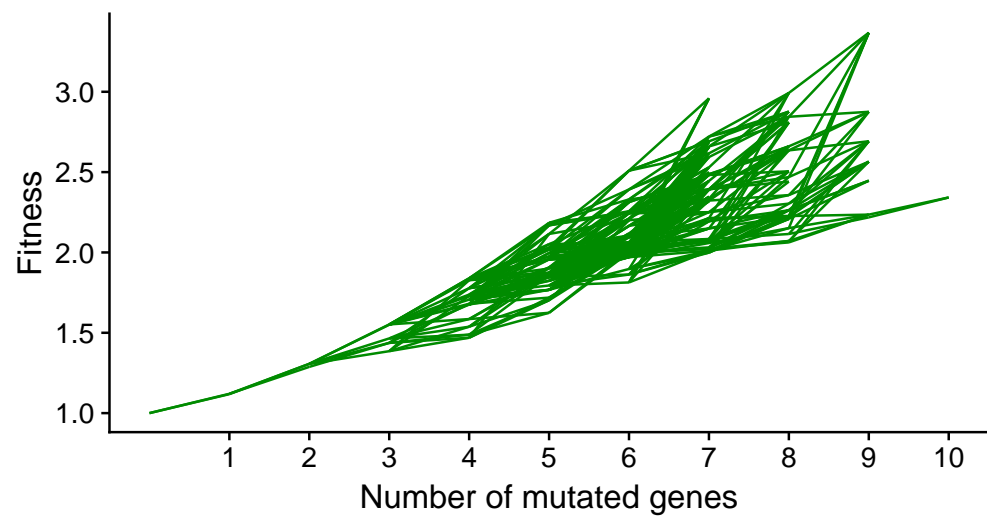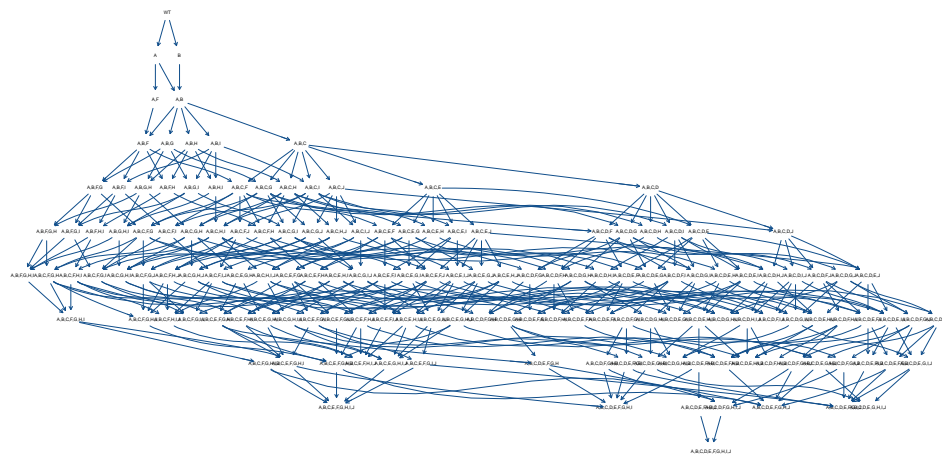

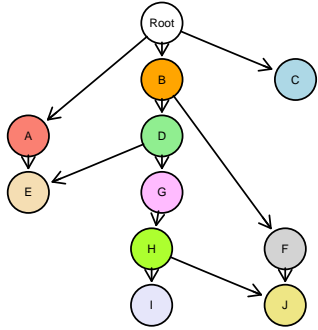

ID 5MCNYearEvdY7pit  
 acc genotypes 72  
 peaks no back 8  
 removed edges 33  
 prop rem edges 0.188

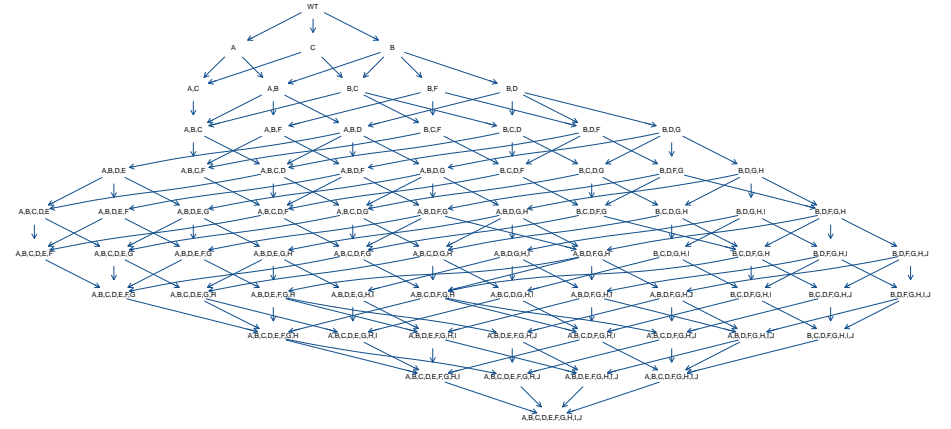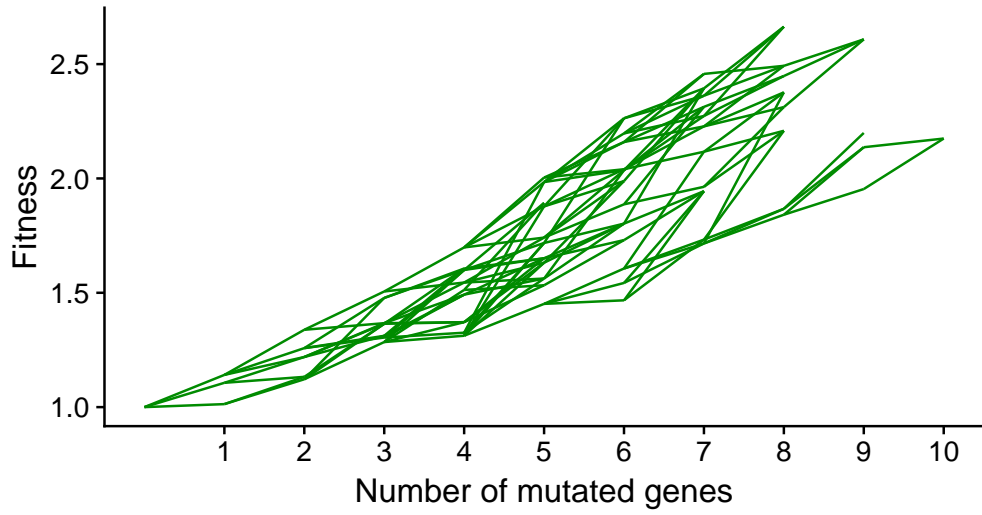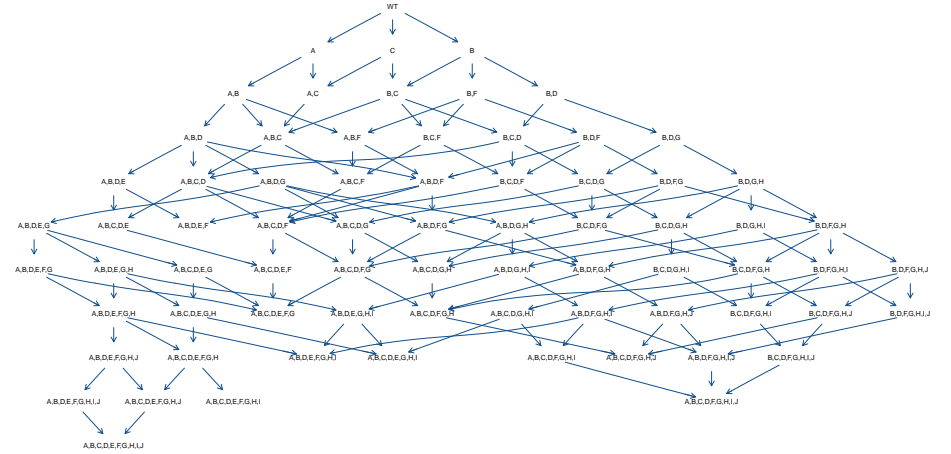



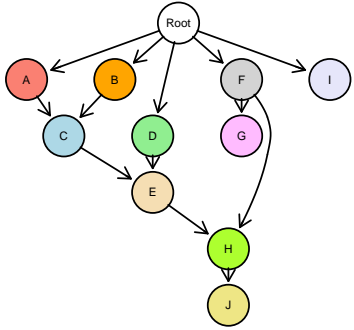

ID **5MxLARdmCMPqgUDW**  
 acc genotypes **74**  
 peaks no back **9**  
 removed edges **35**  
 prop rem edges **0.185**

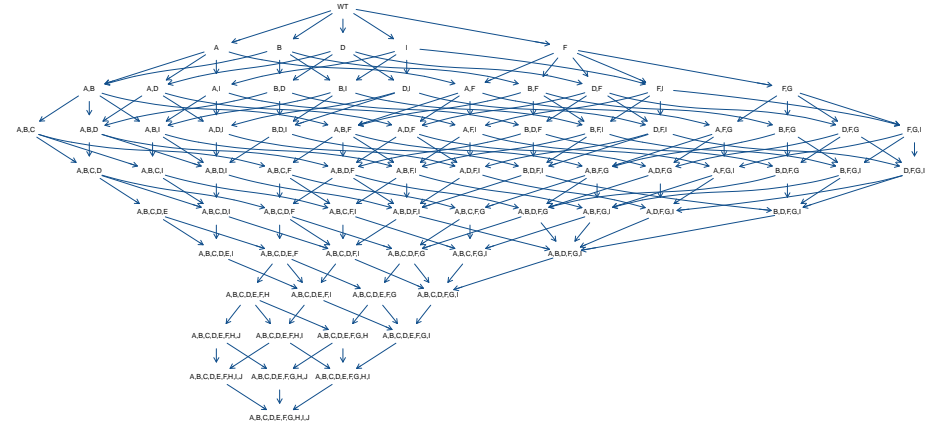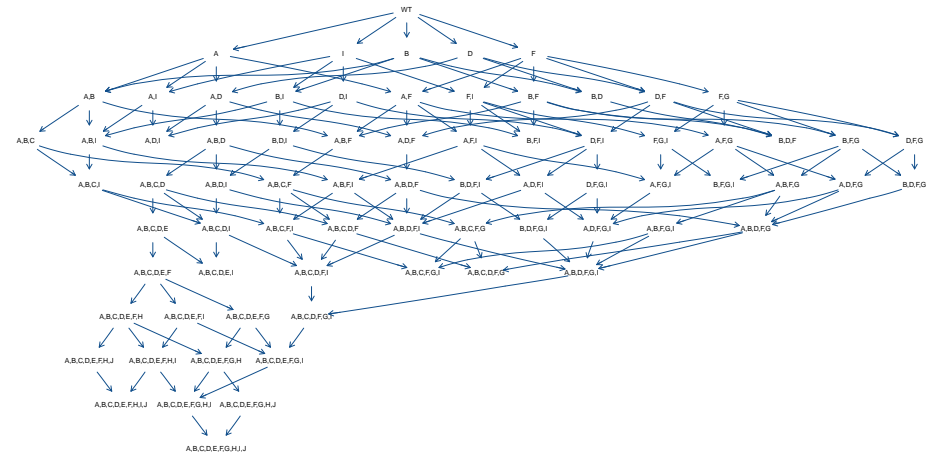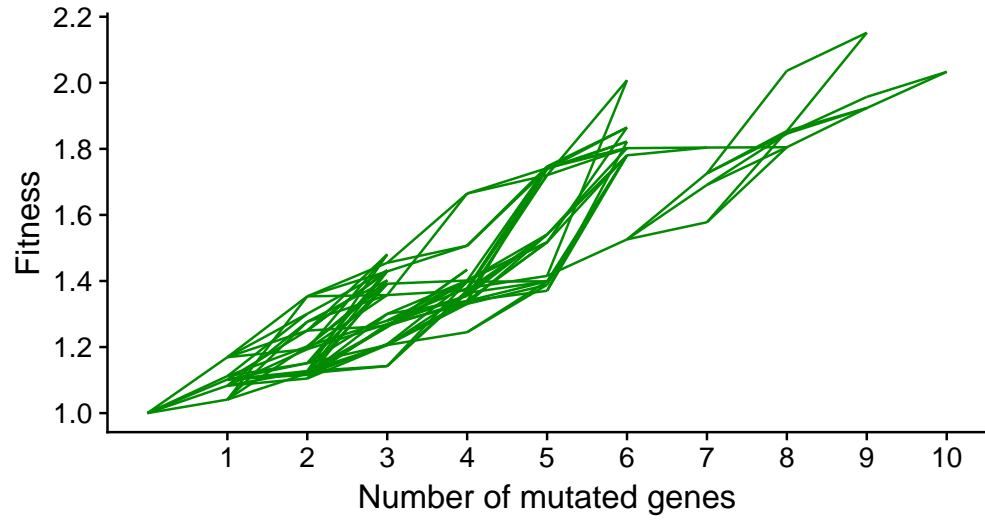

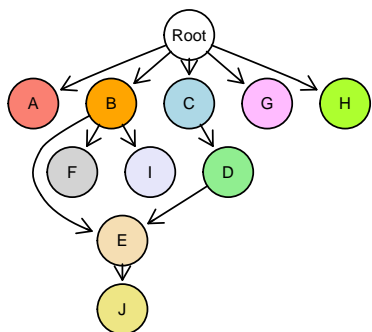

ID 5URt4ktlFolpEsp3  
 acc genotypes 184  
 peaks no back 19  
 removed edges 120  
 prop rem edges 0.199

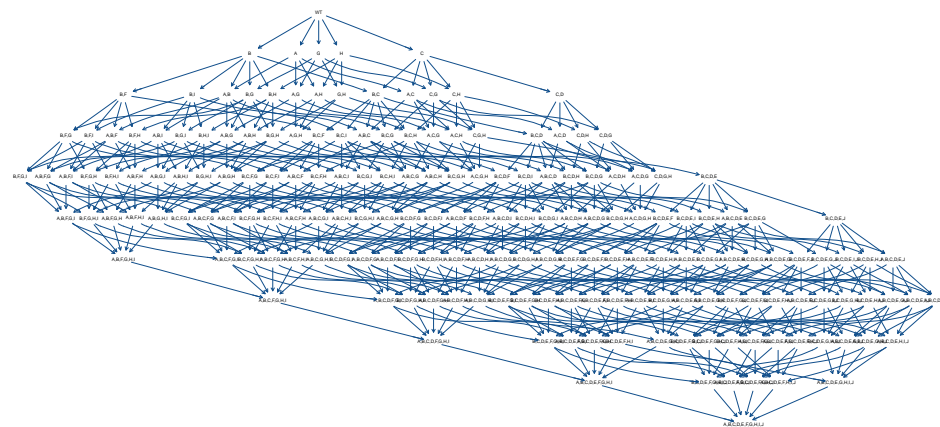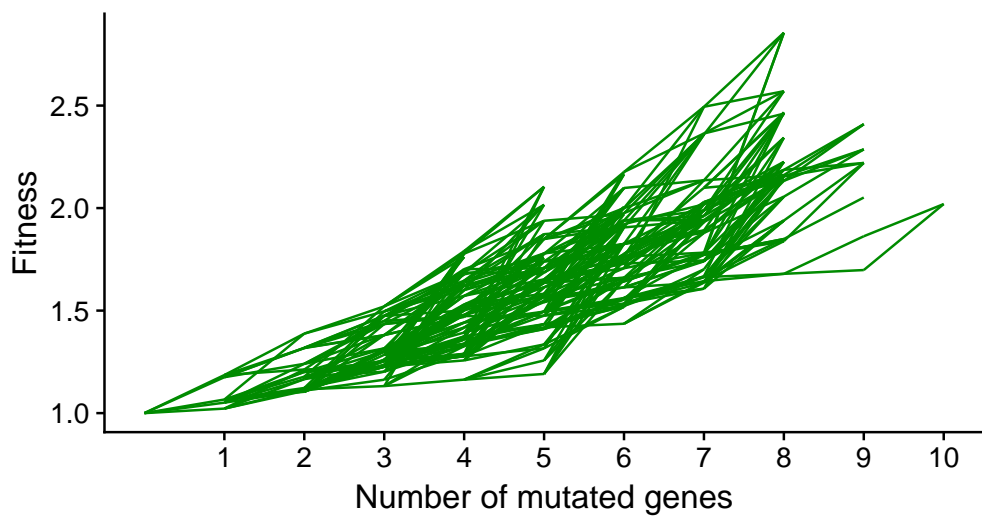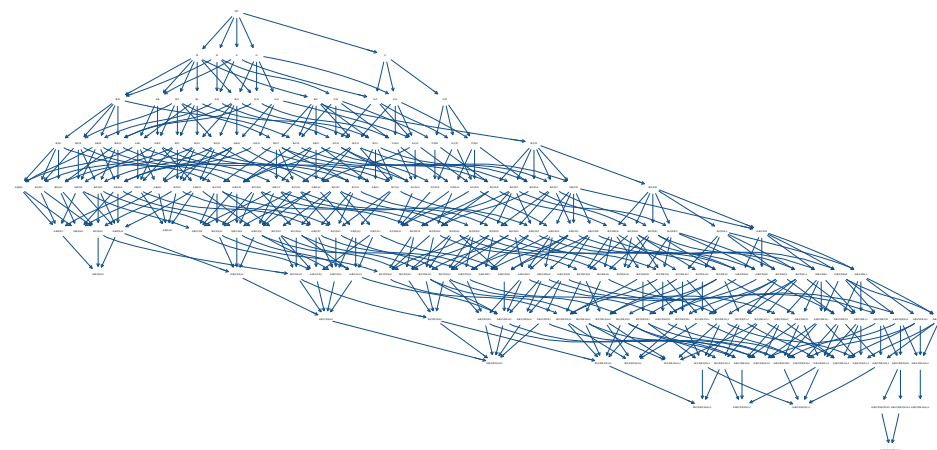

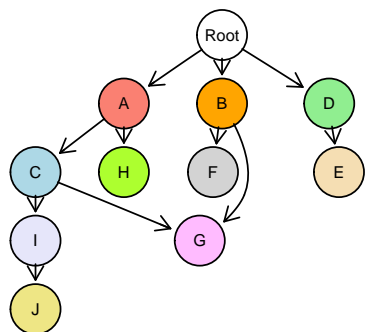

ID 64xXOCLCH1gFTB10v  
 acc genotypes 117  
 peaks no back 12  
 removed edges 78  
 prop rem edges 0.239

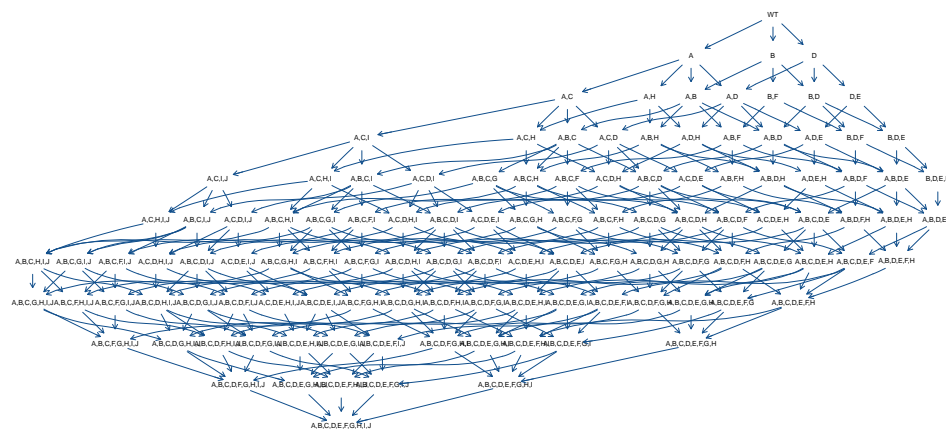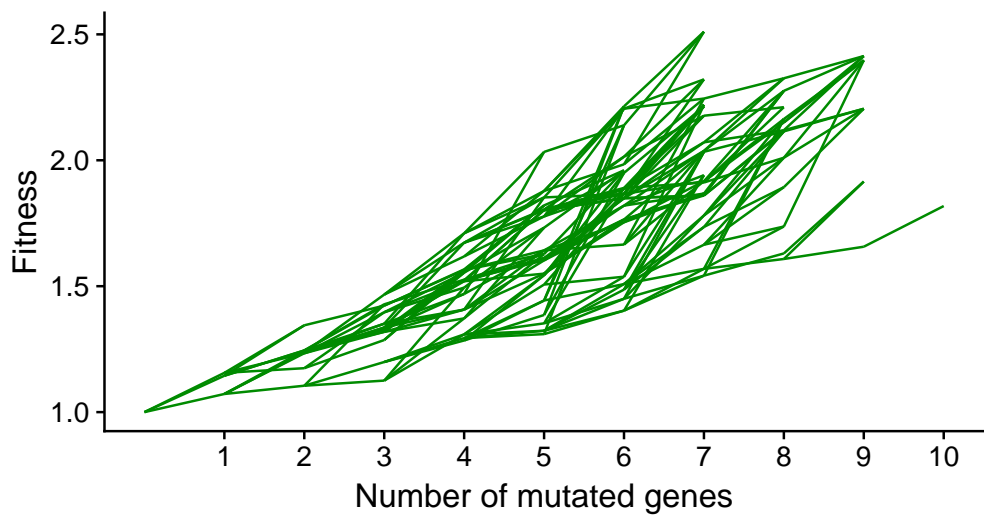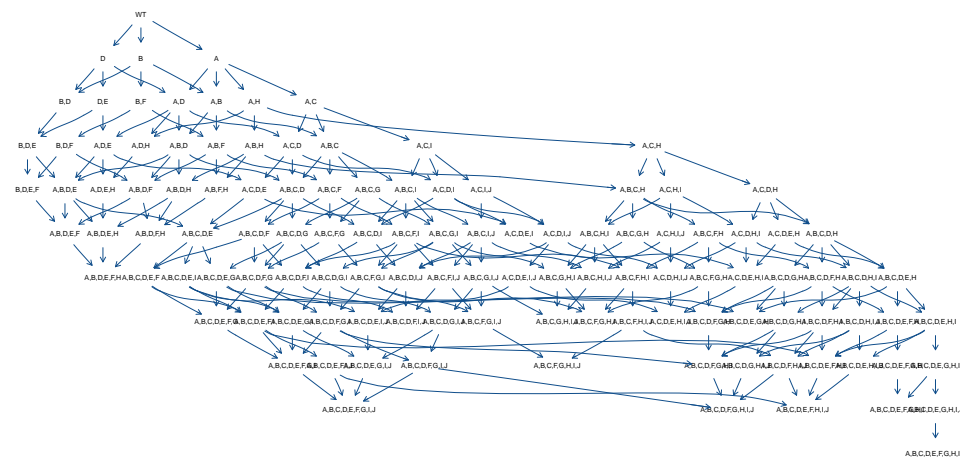

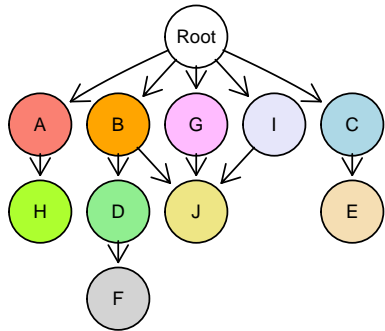

ID **69GLOdUeTxOq6MVW**  
 acc genotypes **171**  
 peaks no back **13**  
 removed edges **102**  
 prop rem edges **0.194**

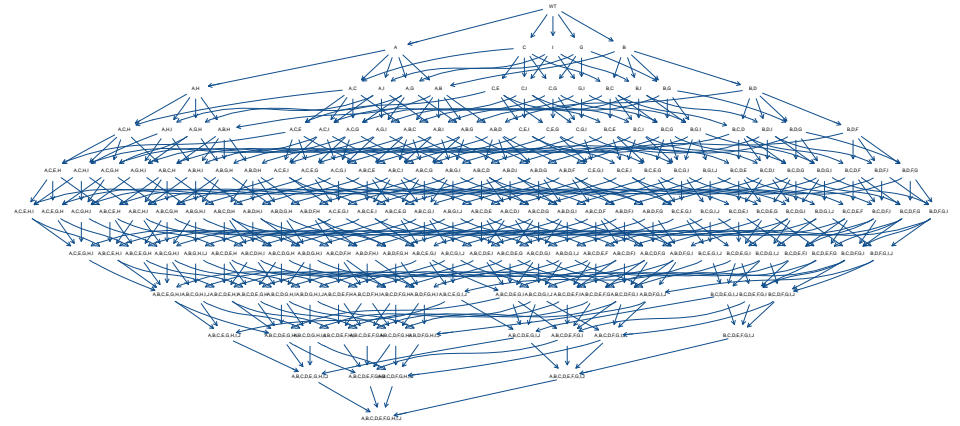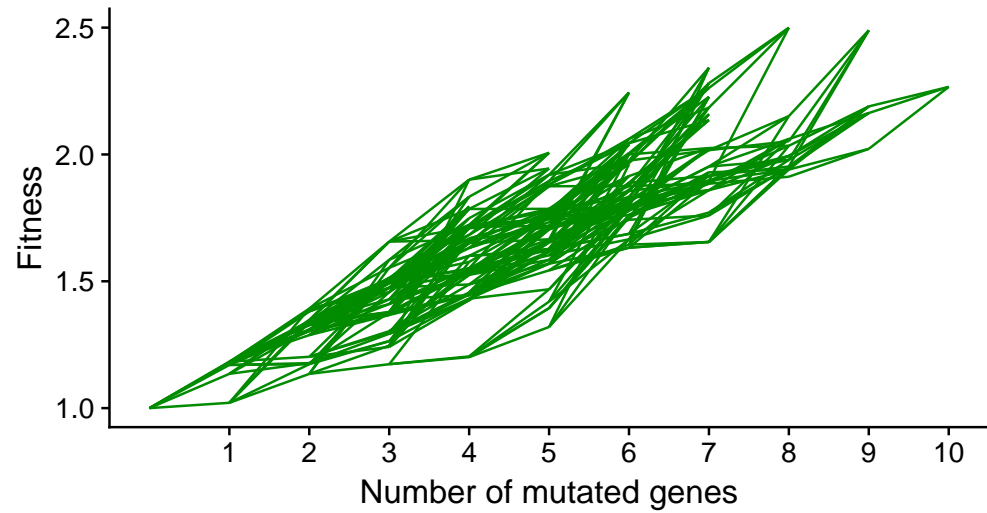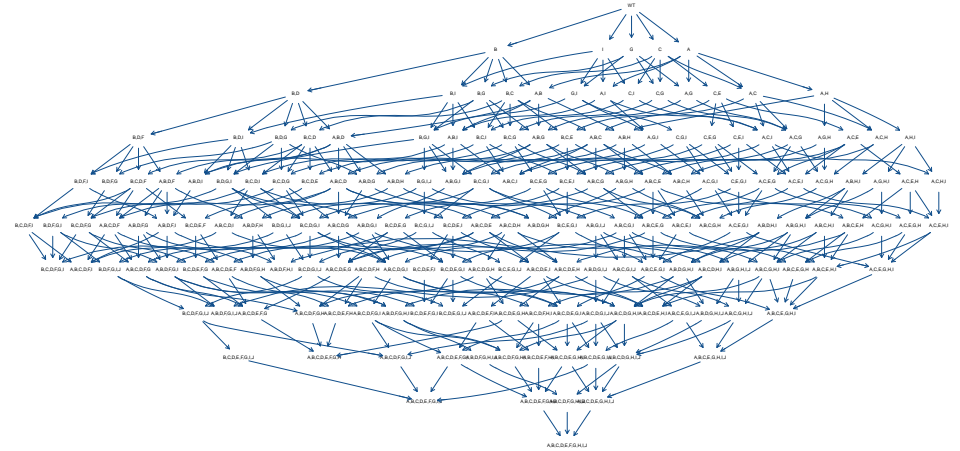

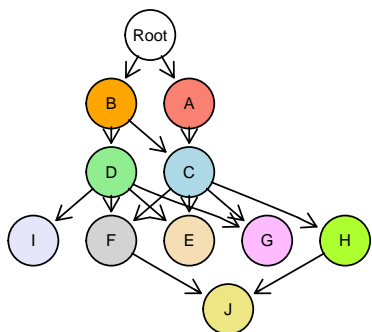

ID 6dNxcxBCKj6SRe7c  
 acc genotypes 50  
 peaks no back 7  
 removed edges 19  
 prop rem edges 0.164

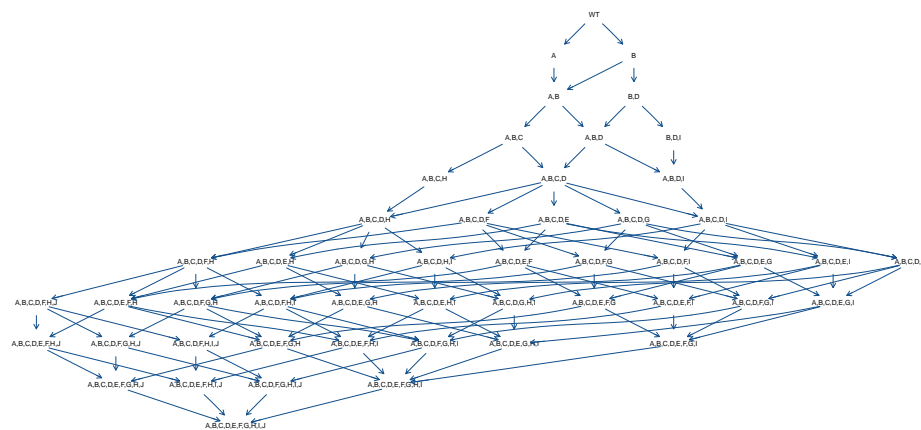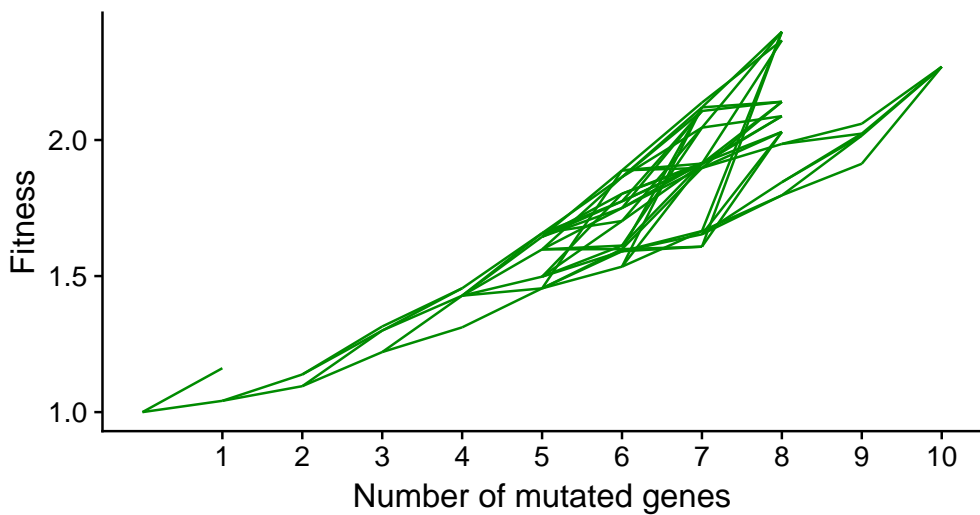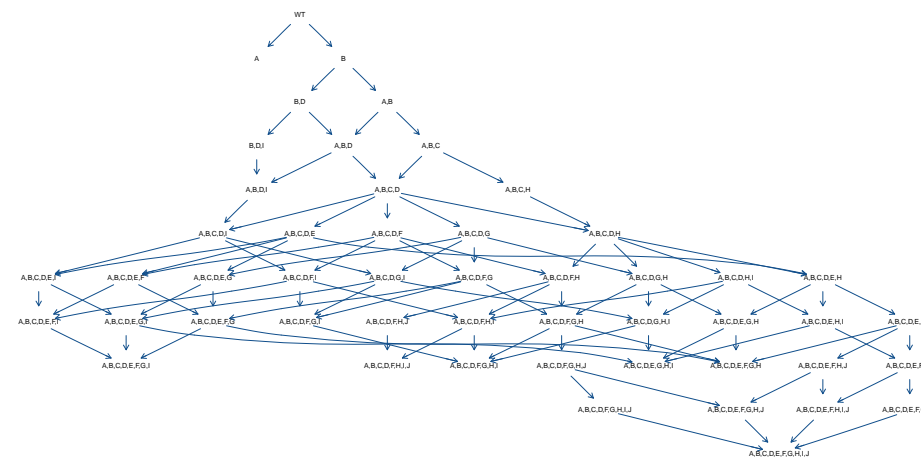

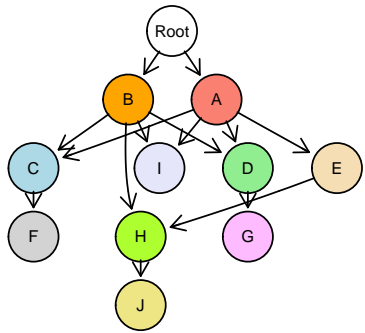

ID **6fale6UPTkVnVhjC**  
 acc genotypes **76**  
 peaks no back **7**  
 removed edges **24**  
 prop rem edges **0.125**

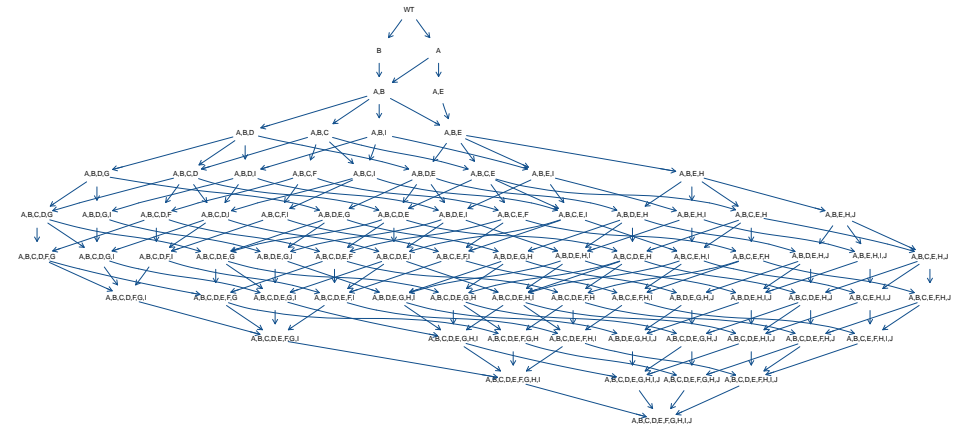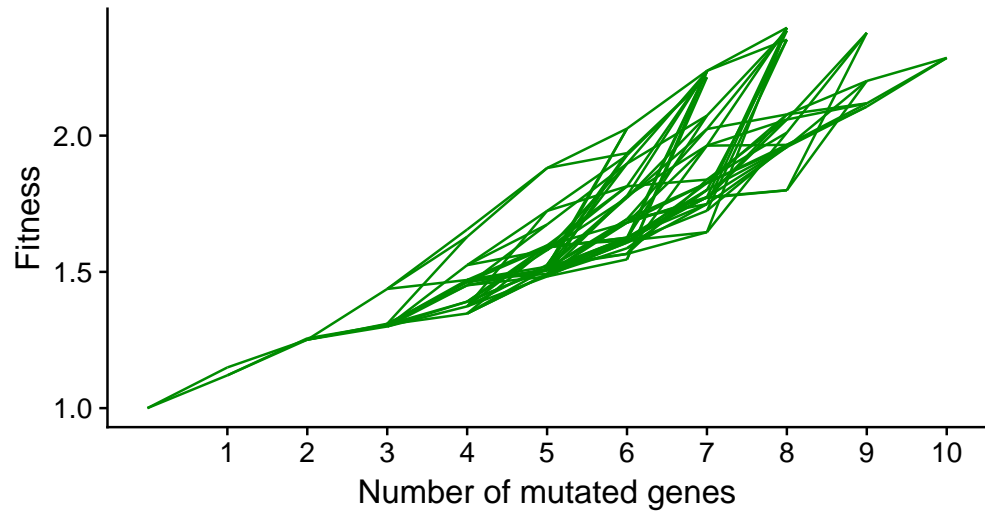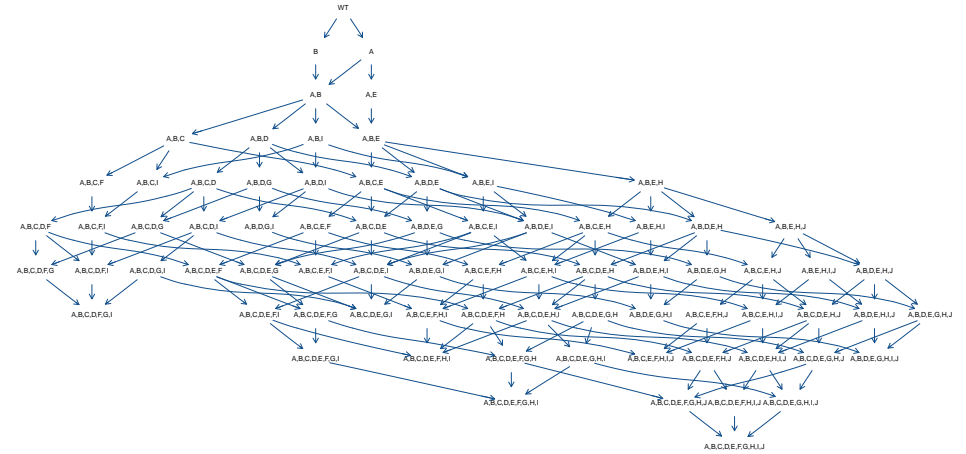

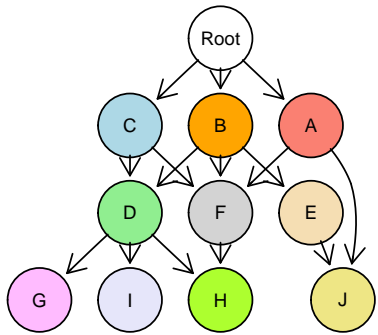

ID 6j2DyMAhErFeSJJJe  
 acc genotypes 61  
 peaks no back 9  
 removed edges 26  
 prop rem edges 0.186

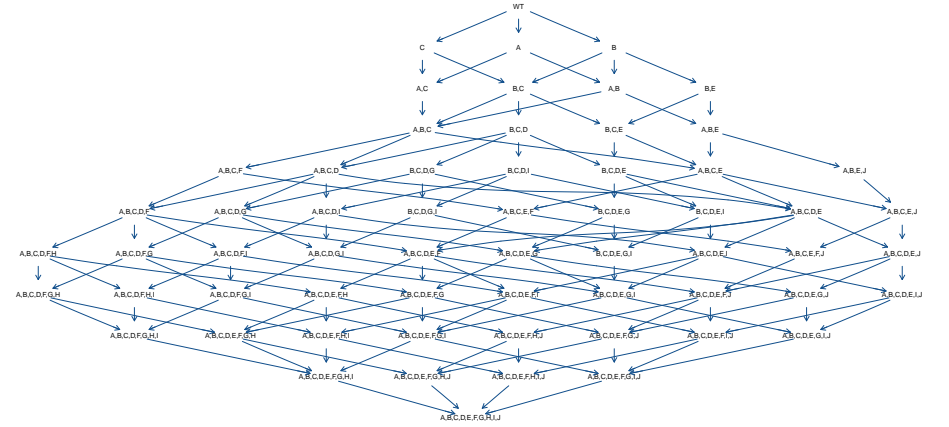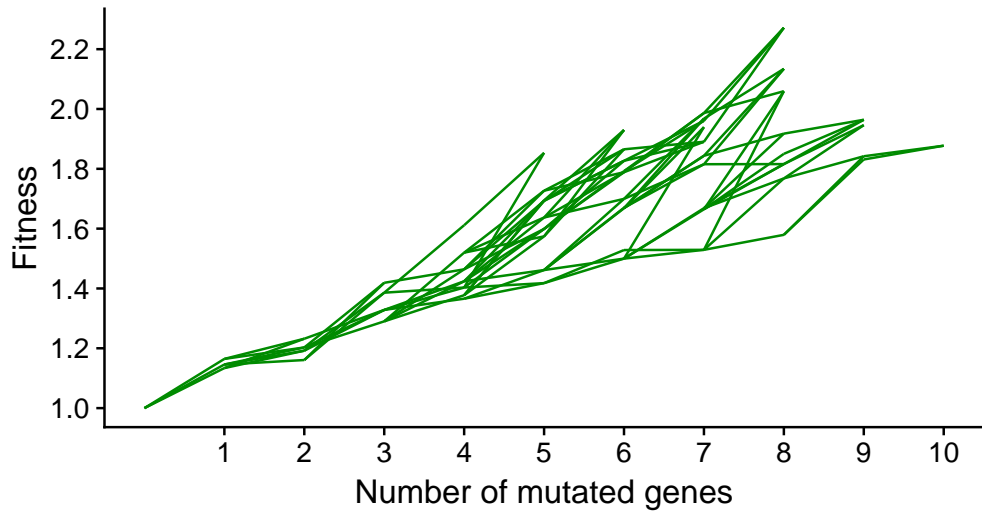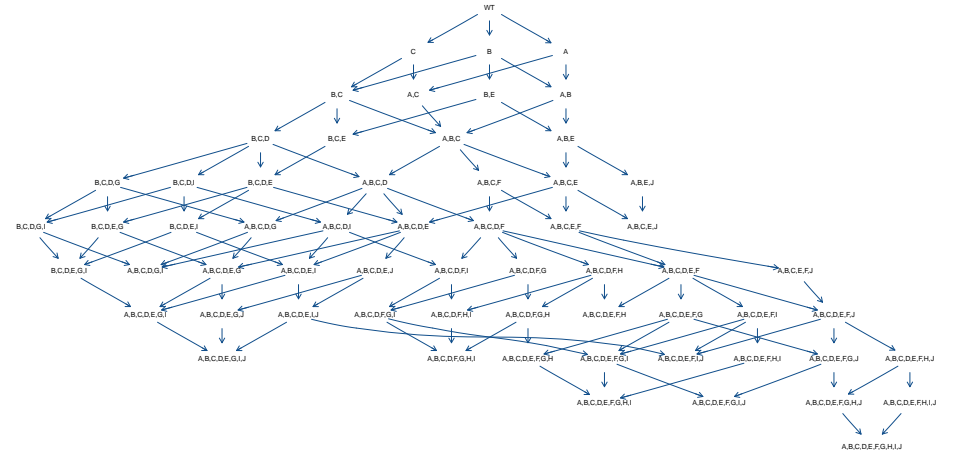

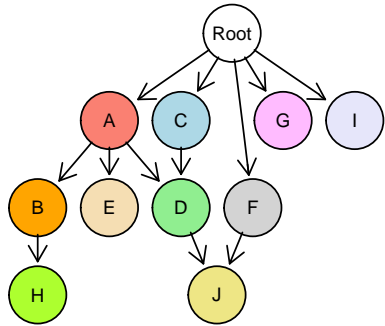

ID **7wUPQMRQPYfPVSq**  
 acc genotypes **184**  
 peaks no back **17**  
 removed edges **135**  
 prop rem edges **0.224**

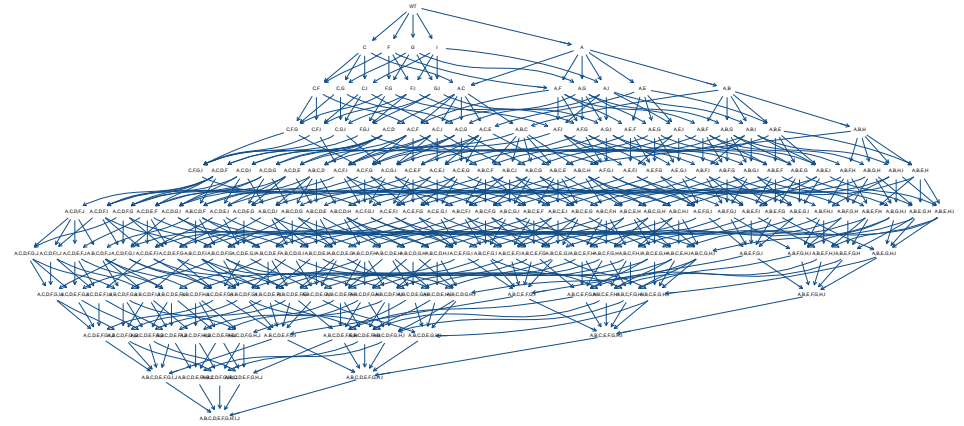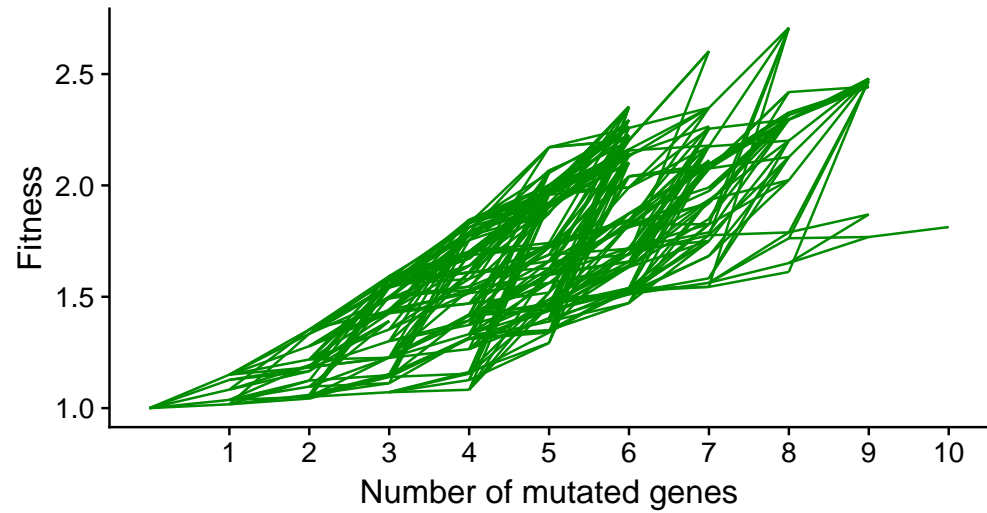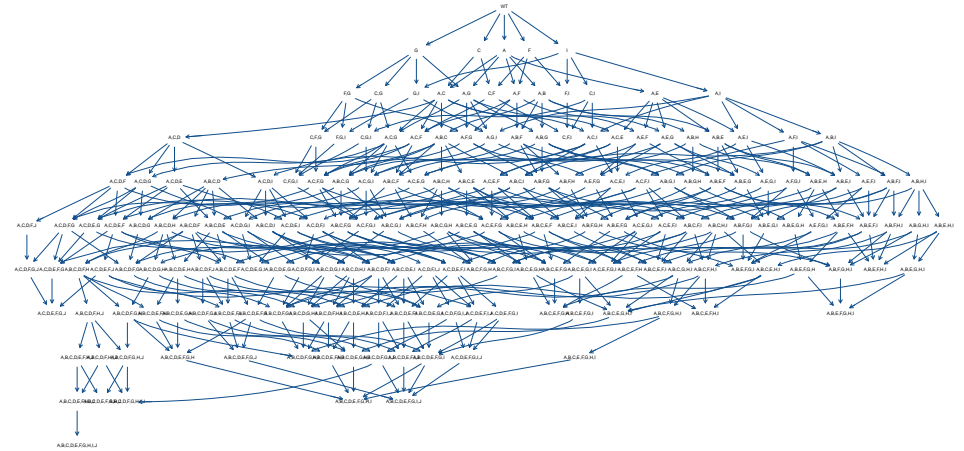



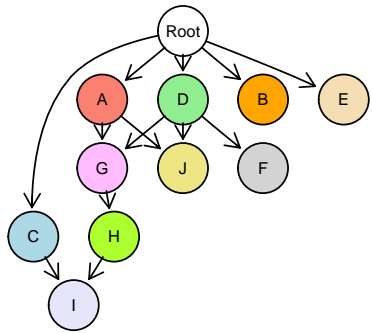

ID 87fcp96NbP7zN7N  
 acc genotypes 144  
 peaks no back 13  
 removed edges 63  
 prop rem edges 0.141

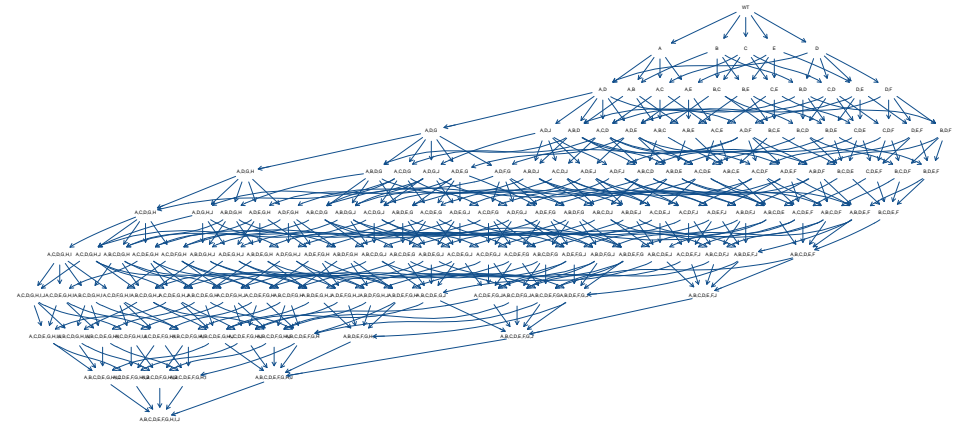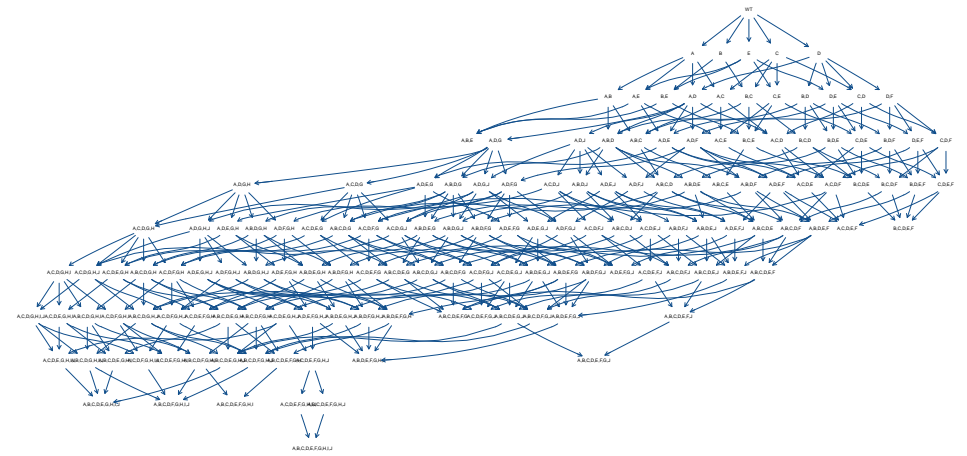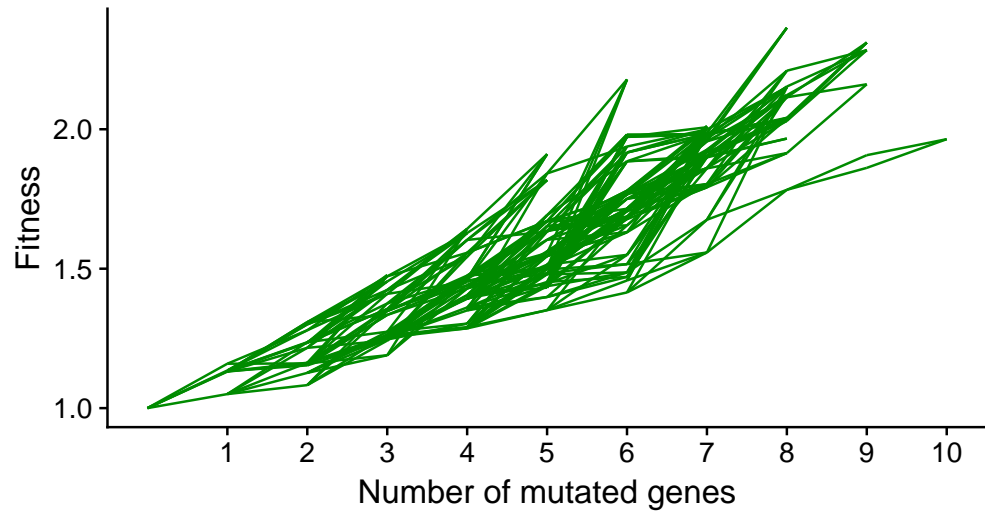

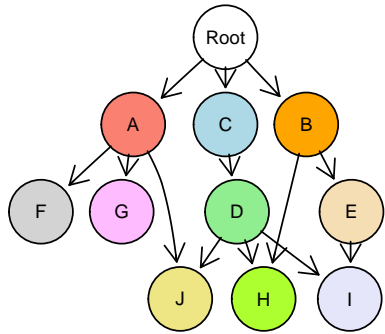

ID 8GlpGw8kSqHXEOja  
 acc genotypes 93  
 peaks no back 9  
 removed edges 40  
 prop rem edges 0.165

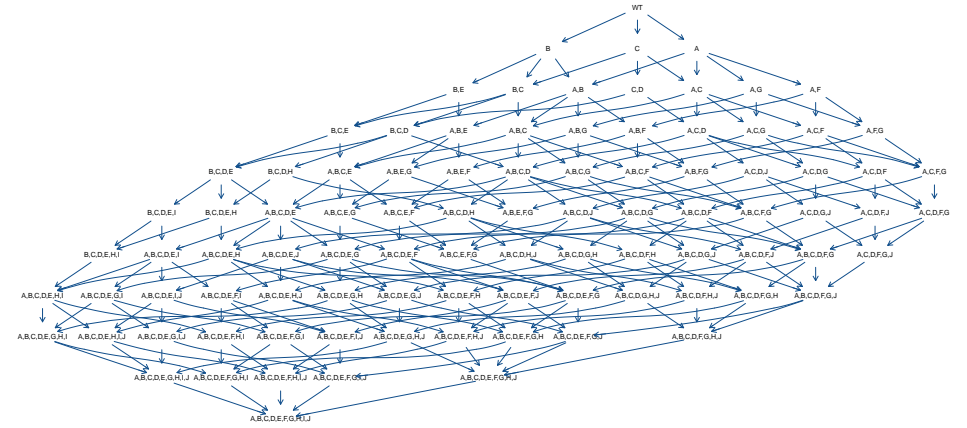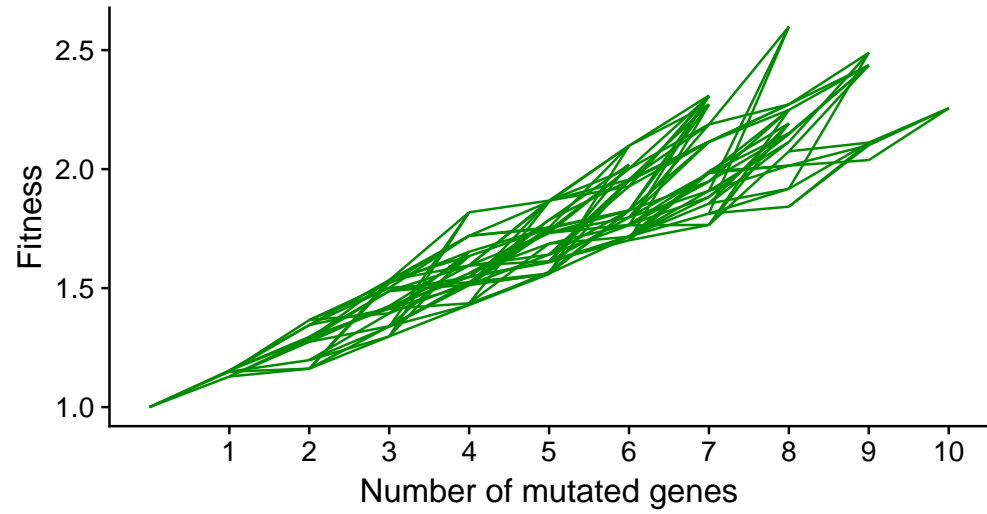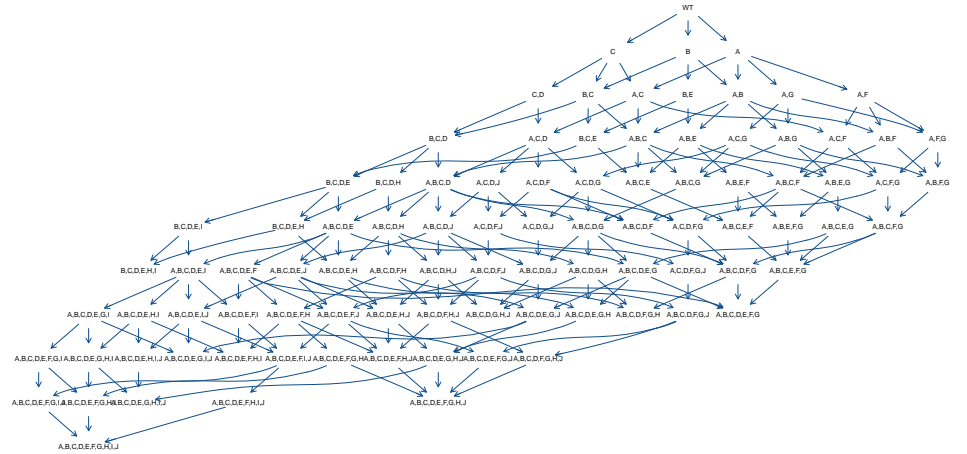

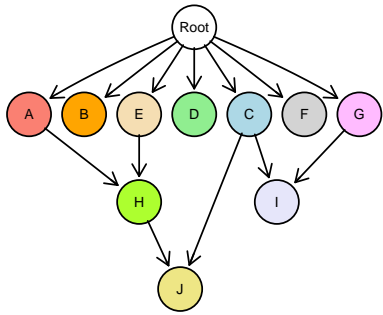

ID 8OAYTmnWfxxdHTRV  
 acc genotypes 224  
 peaks no back 18  
 removed edges 163  
 prop rem edges 0.21

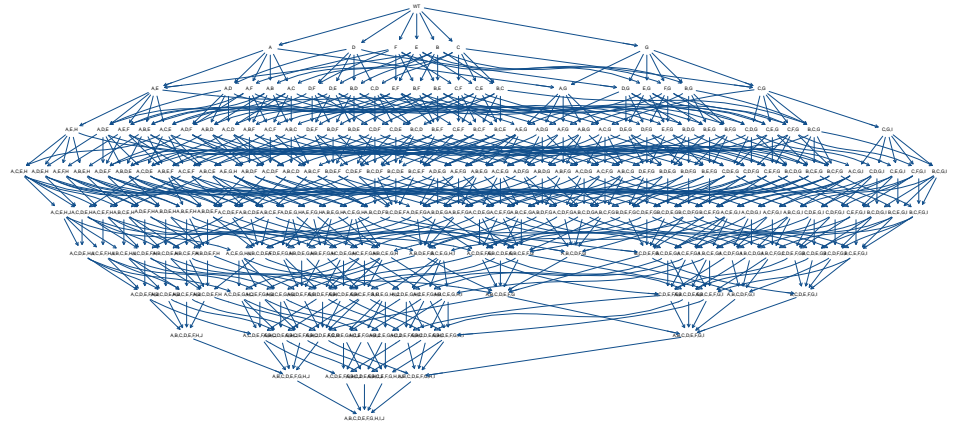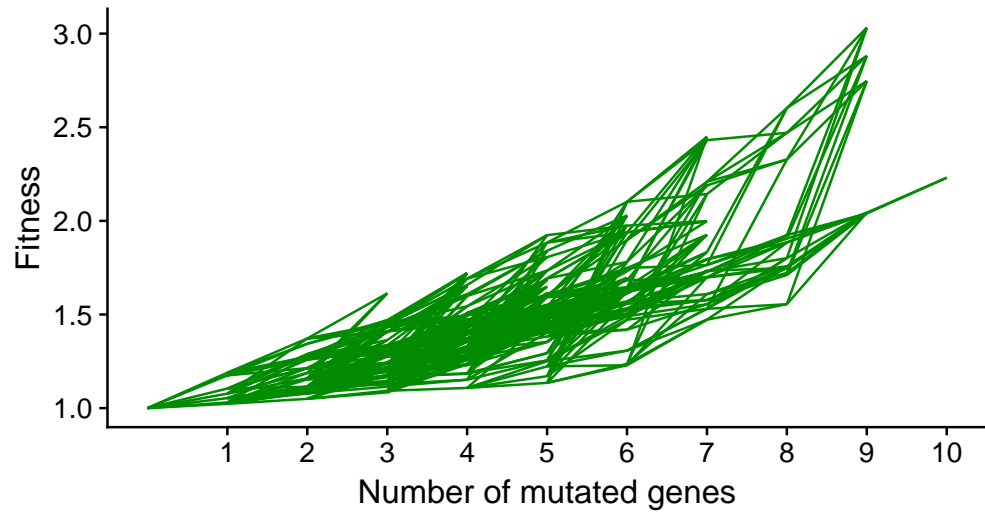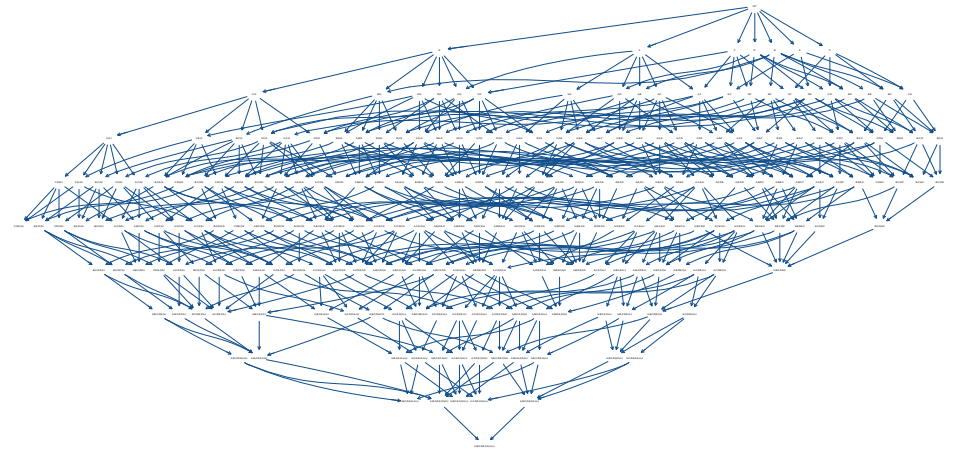

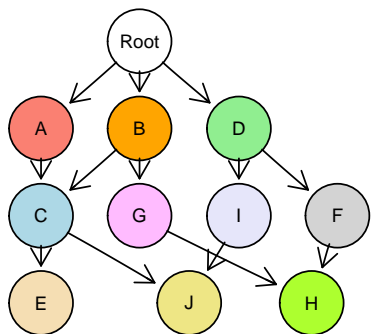

ID 8pBC5Dt22yGwrF10I  
 acc genotypes 68  
 peaks no back 2  
 removed edges 15  
 prop rem edges 0.095

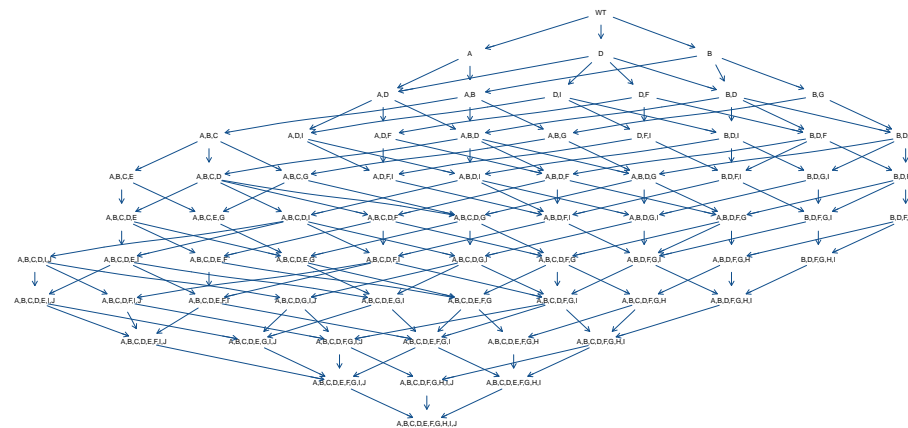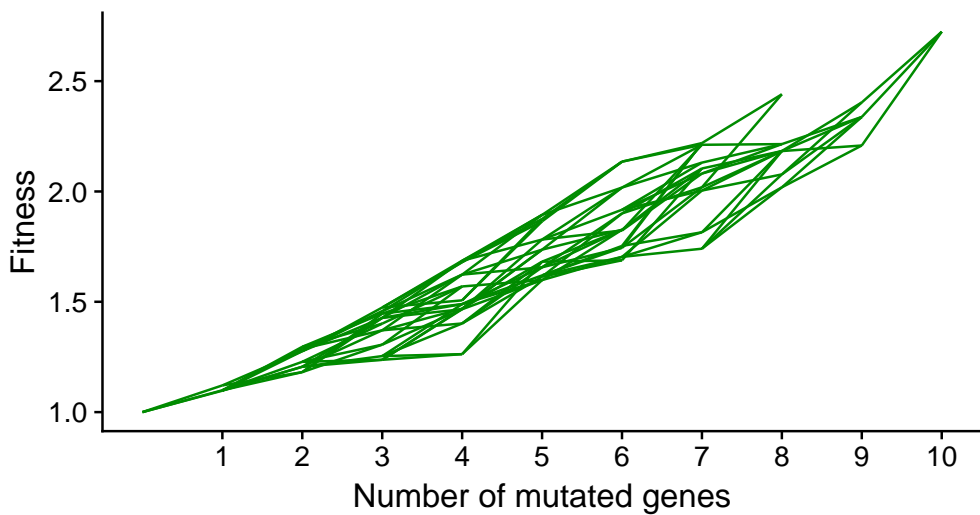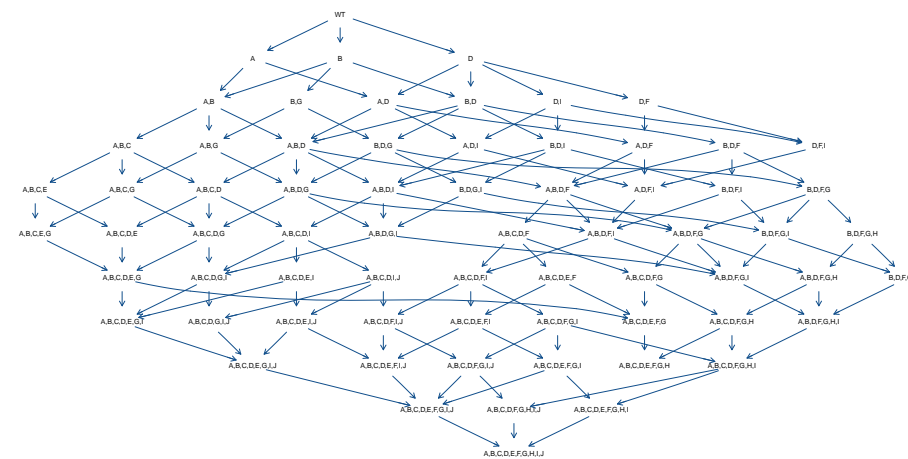

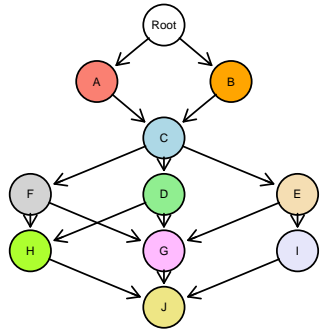

ID 8zRUVMJqJUMsBBKl  
 acc genotypes 24  
 peaks no back 4  
 removed edges 3  
 prop rem edges 0.077

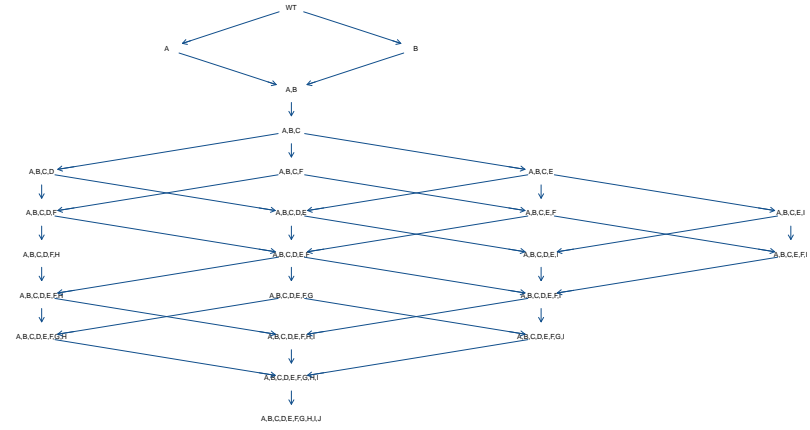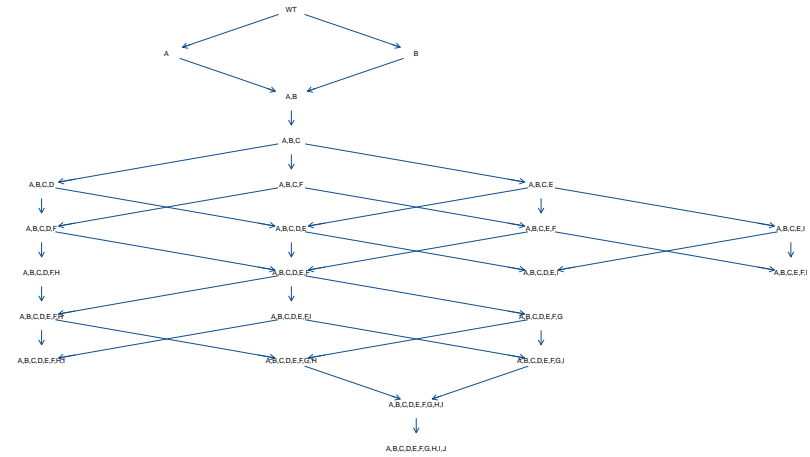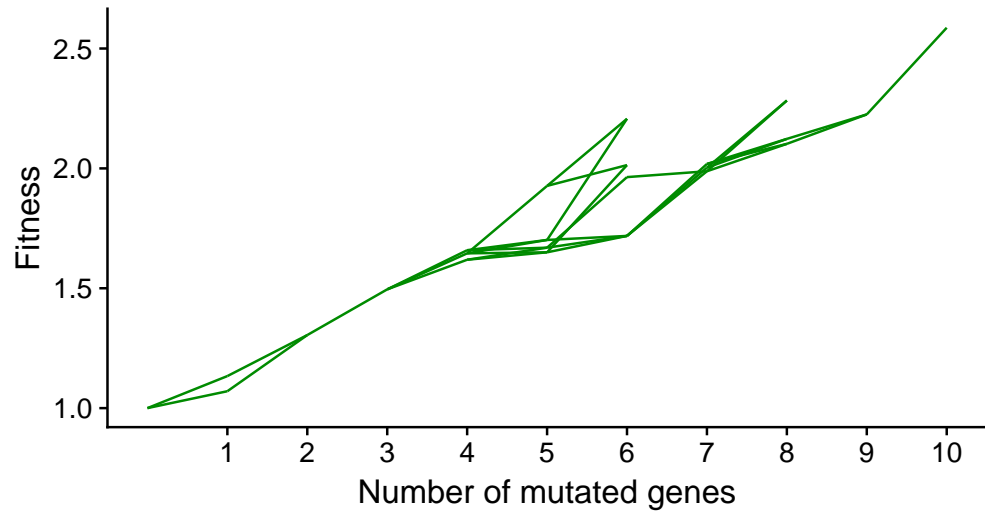

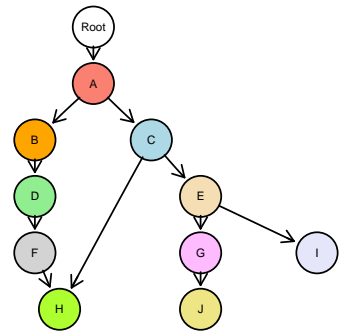

ID 8ZUclGXESgYkqacc  
 acc genotypes 40  
 peaks no back 6  
 removed edges 13  
 prop rem edges 0.171

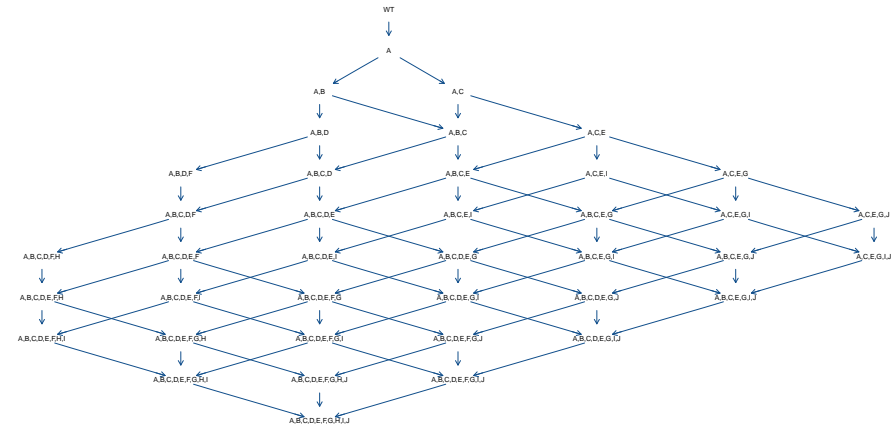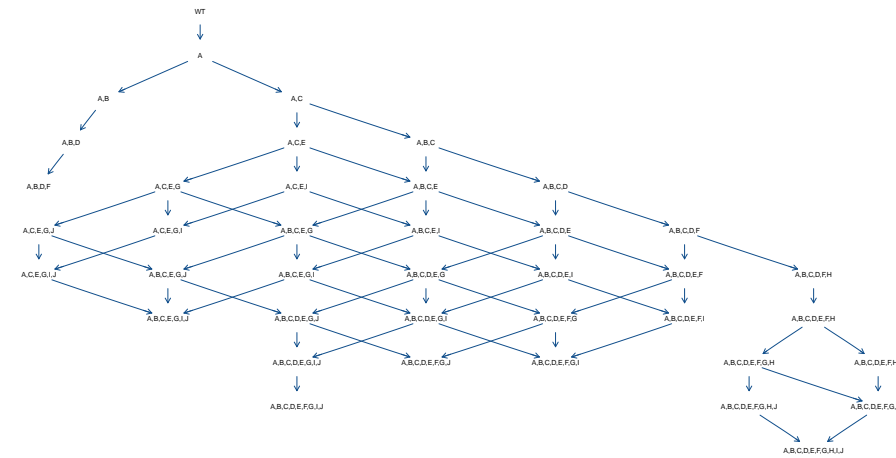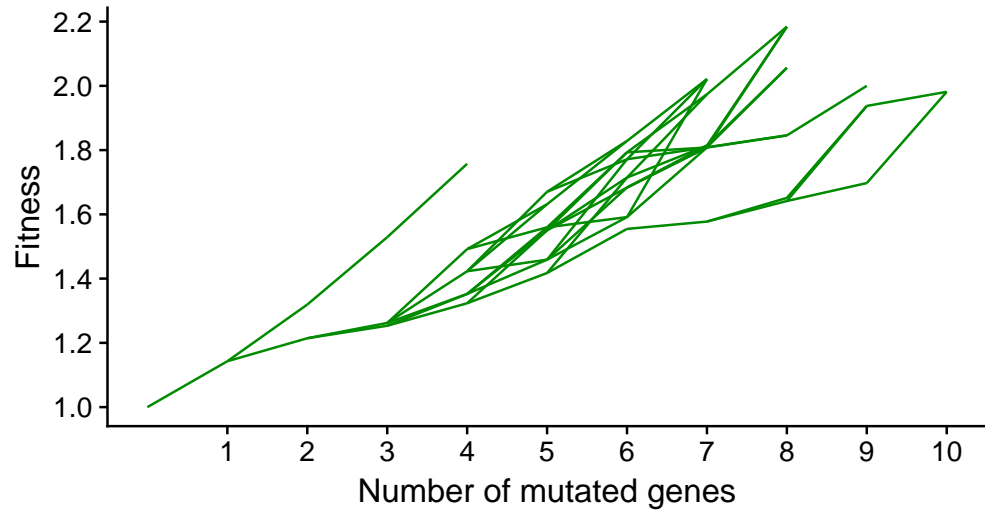

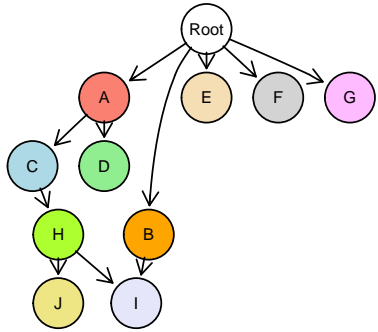

ID 92mZfe3axm10pyB100  
 acc genotypes 176  
 peaks no back 15  
 removed edges 108  
 prop rem edges 0.188

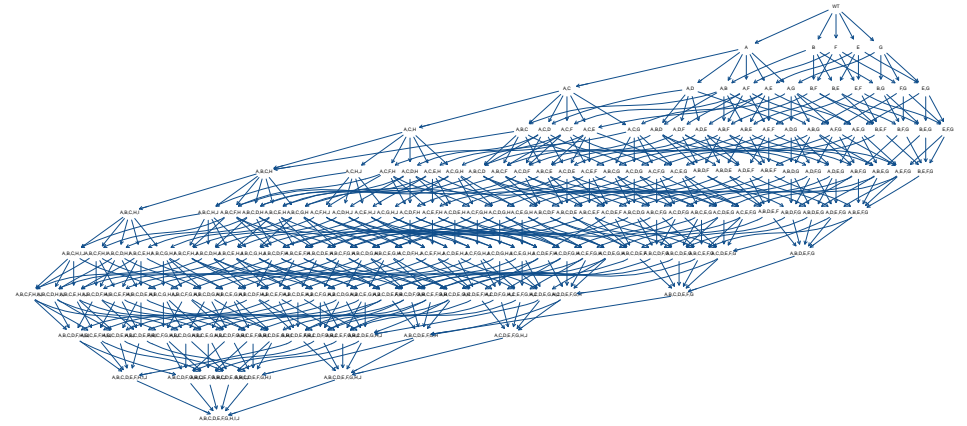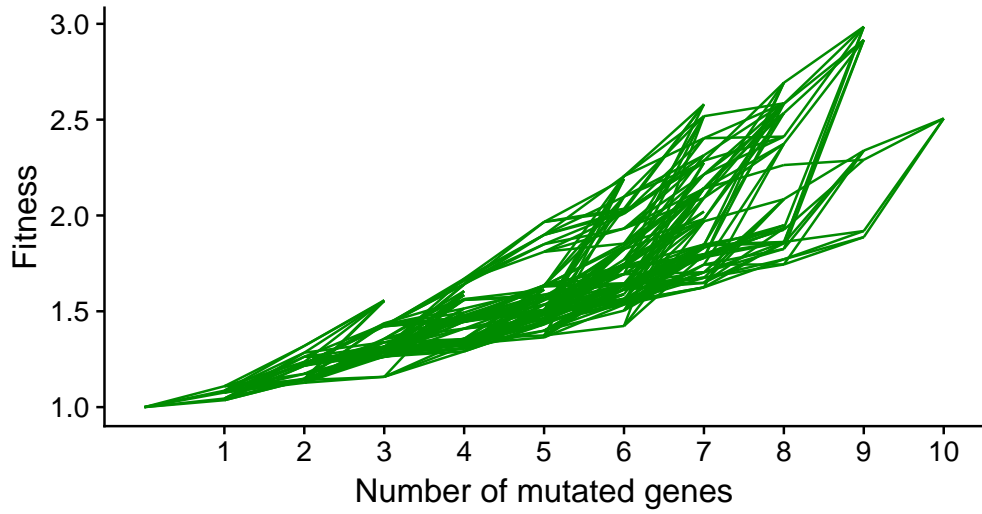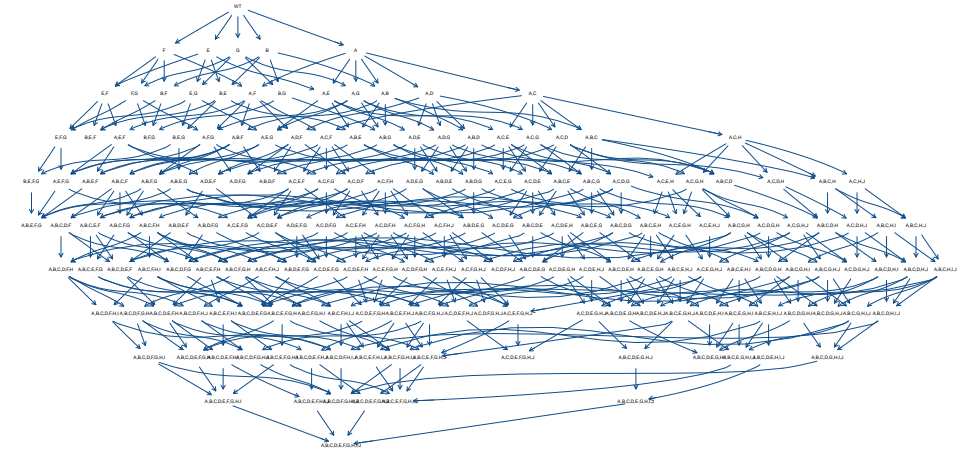

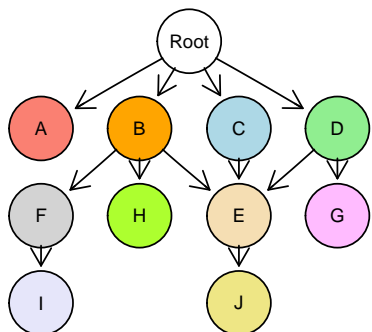

ID 9tzPJQwcPFgCvZpS  
 acc genotypes 132  
 peaks no back 12  
 removed edges 78  
 prop rem edges 0.201

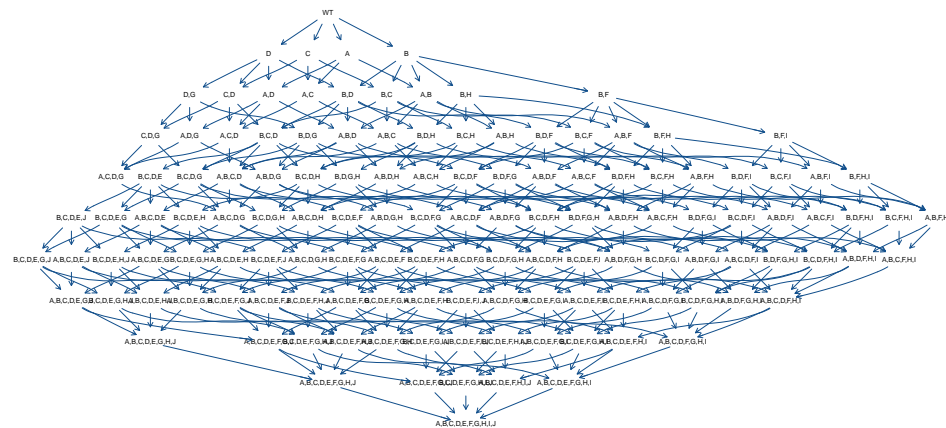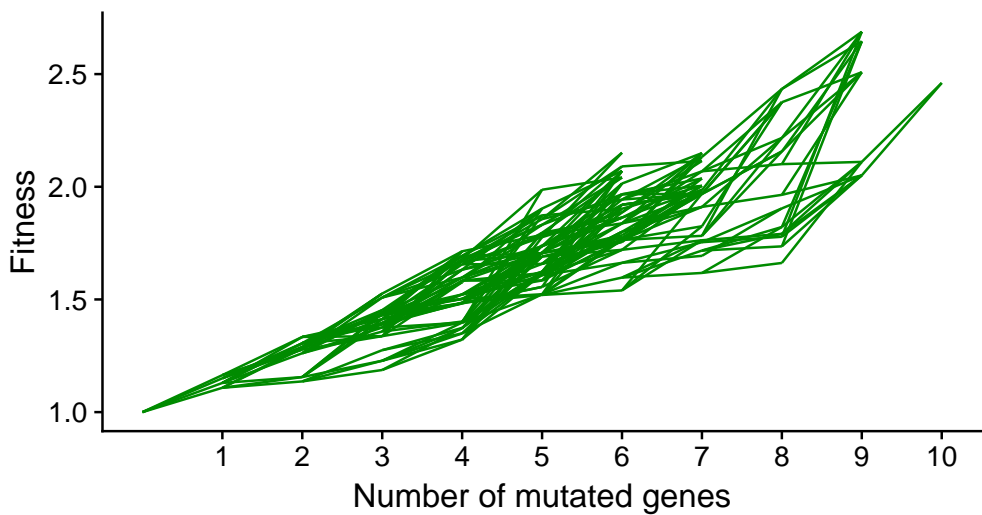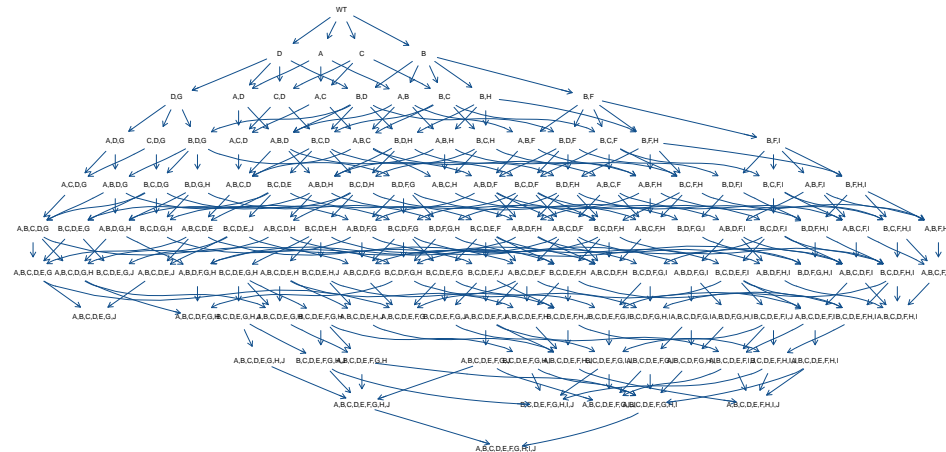



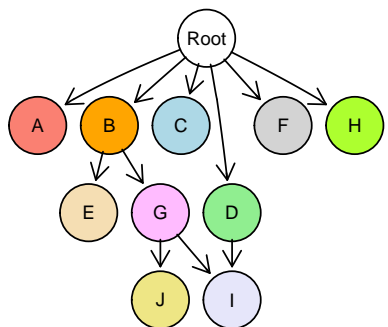

ID 9XhdPR4OnXtyF10ls  
 acc genotypes 288  
 peaks no back 21  
 removed edges 224  
 prop rem edges 0.209

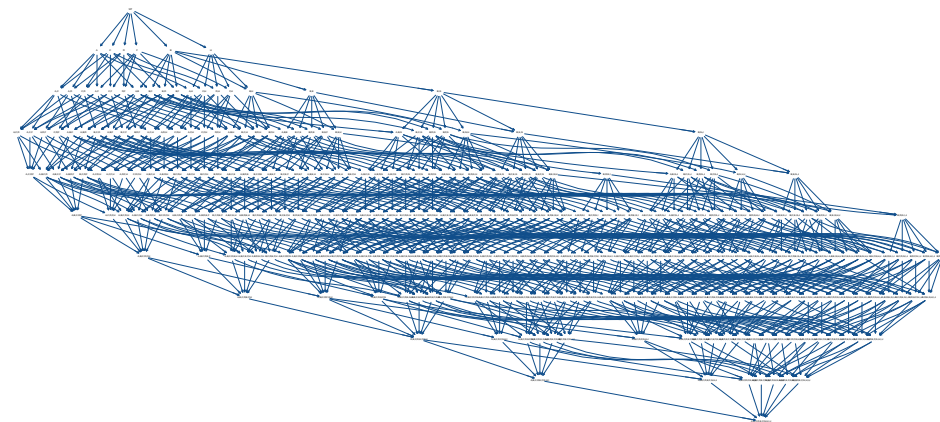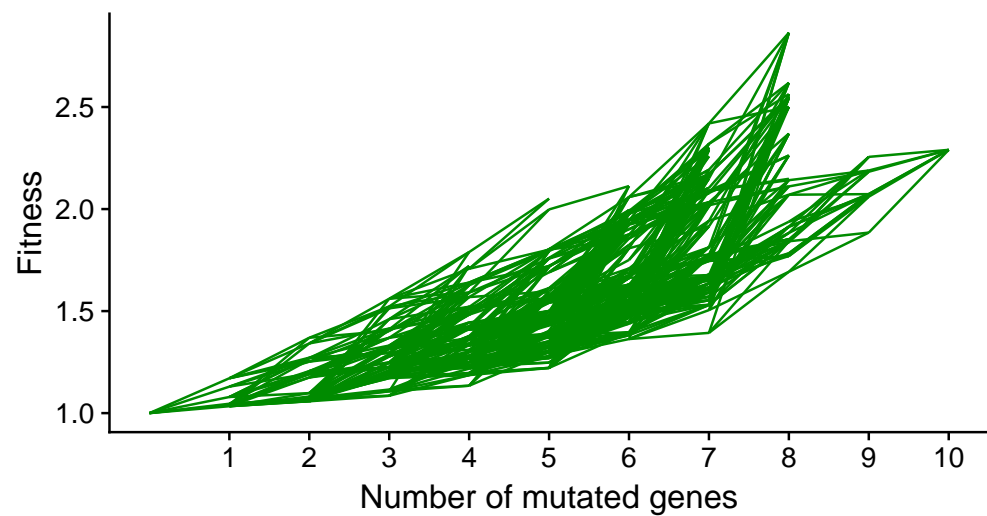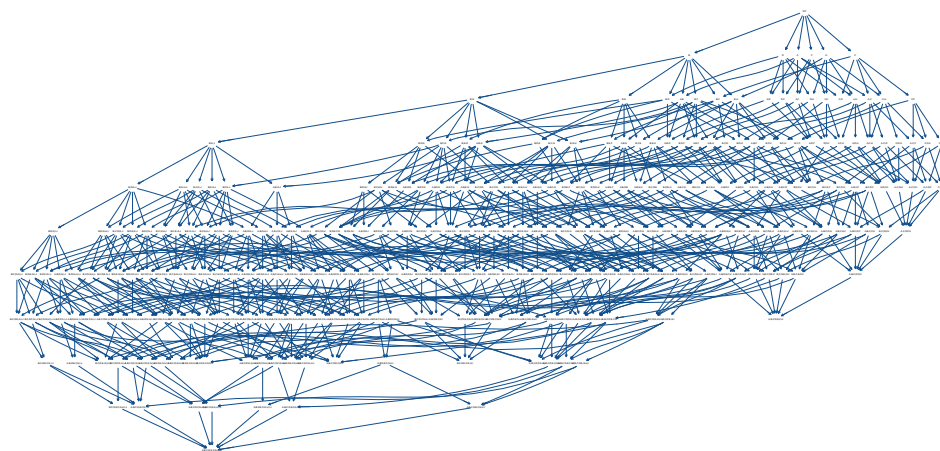

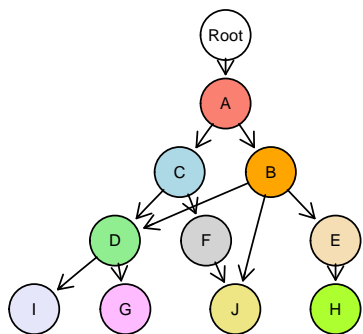

ID **AAvENuRd7EV7ymhh**  
 acc genotypes **52**  
 peaks no back **8**  
 removed edges **21**  
 prop rem edges **0.181**

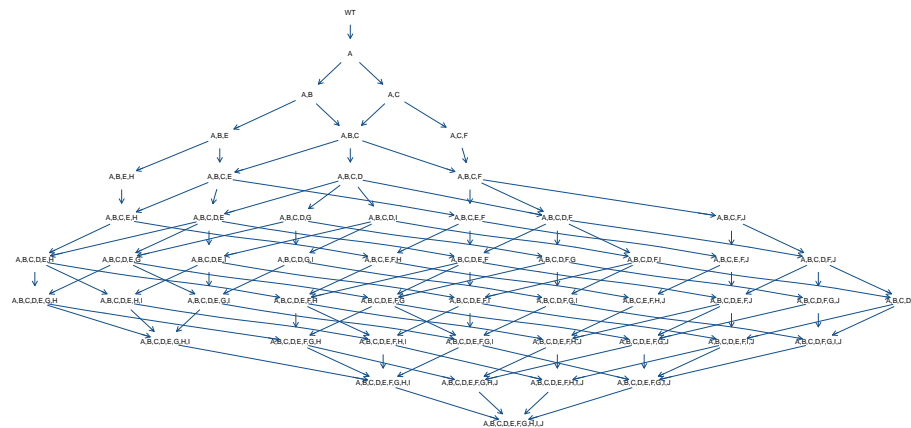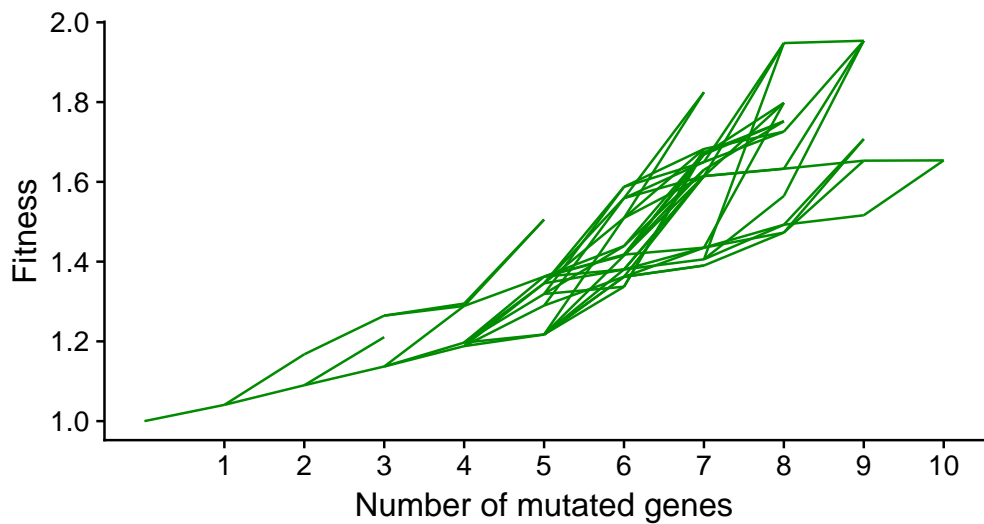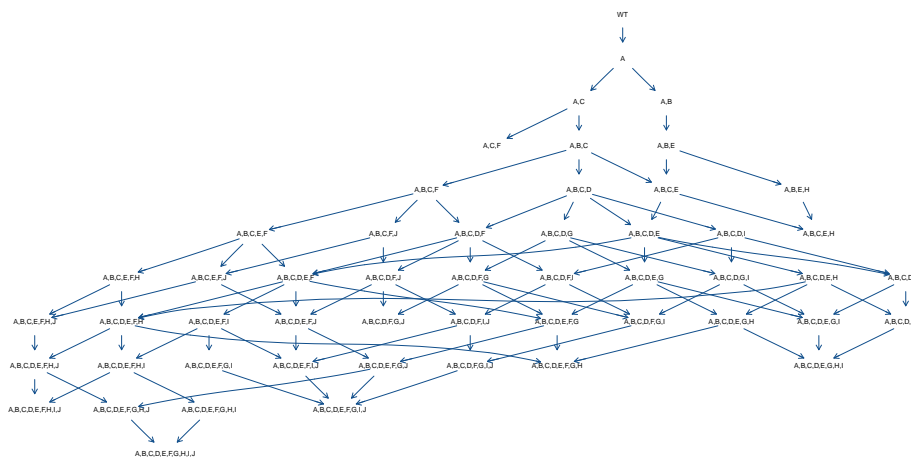

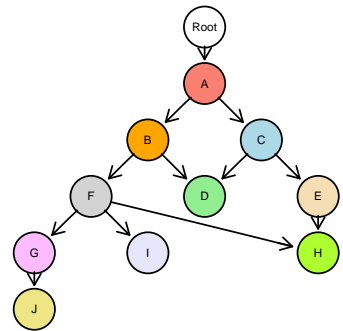

ID **aeSijOttBLISw1Z1**  
 acc genotypes **51**  
 peaks no back **8**  
 removed edges **21**  
 prop rem edges **0.186**

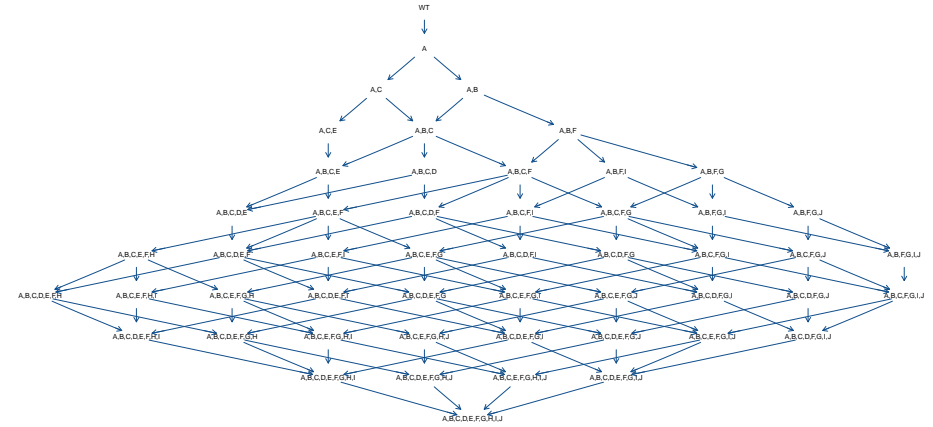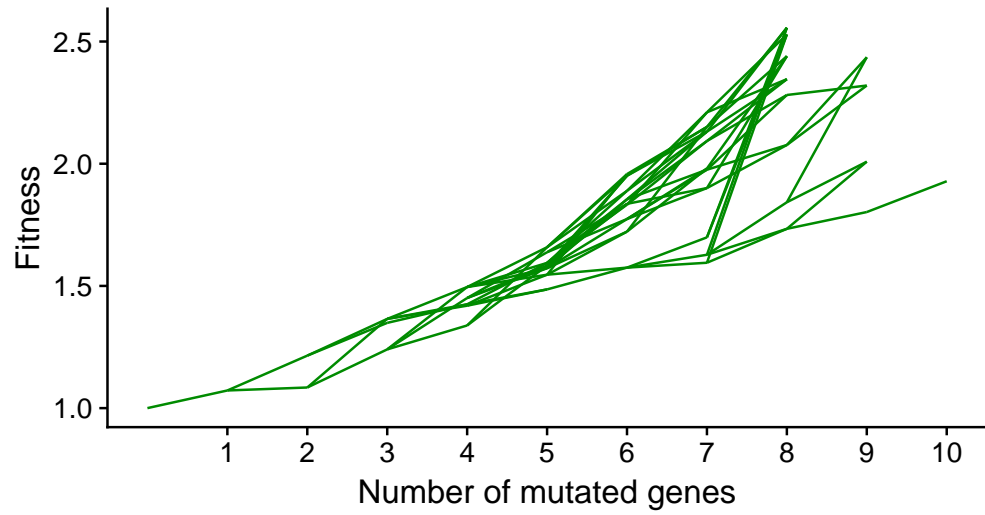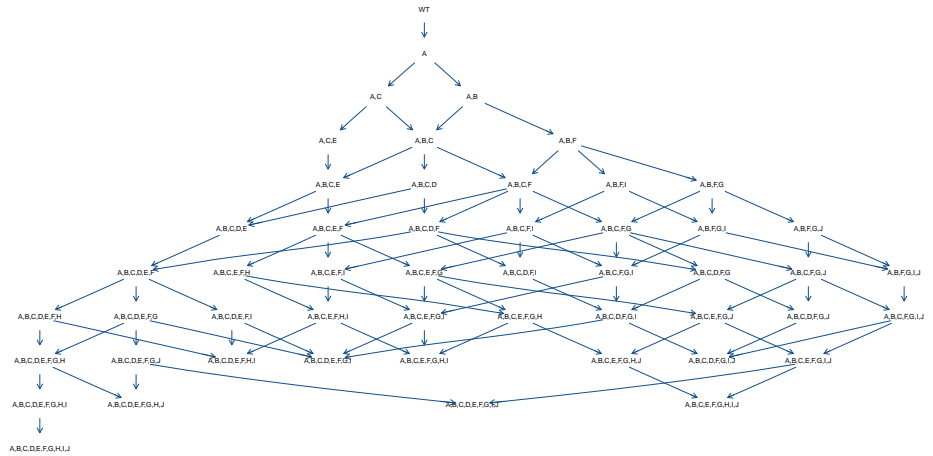

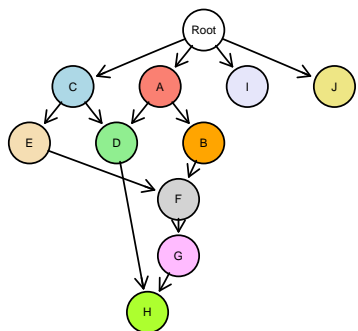

ID **aFSJF5G7y4DBZWSr**  
 acc genotypes **72**  
 peaks no back **8**  
 removed edges **39**  
 prop rem edges **0.217**

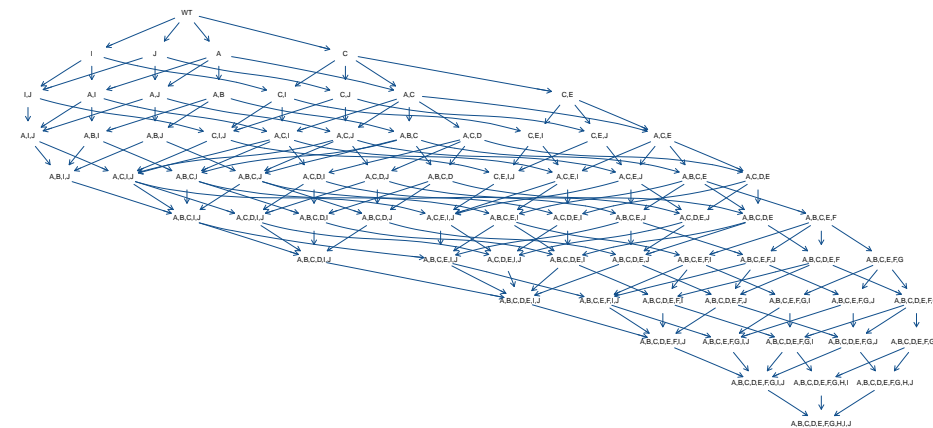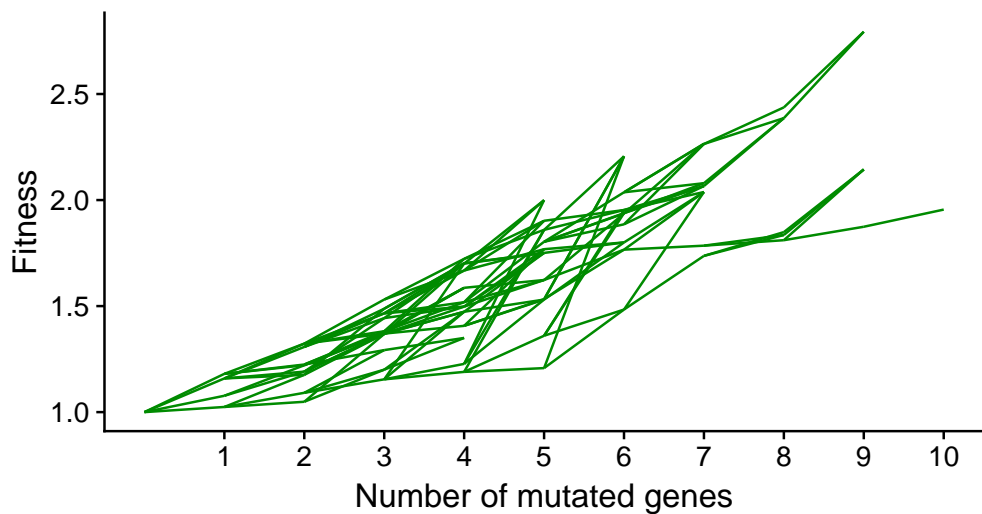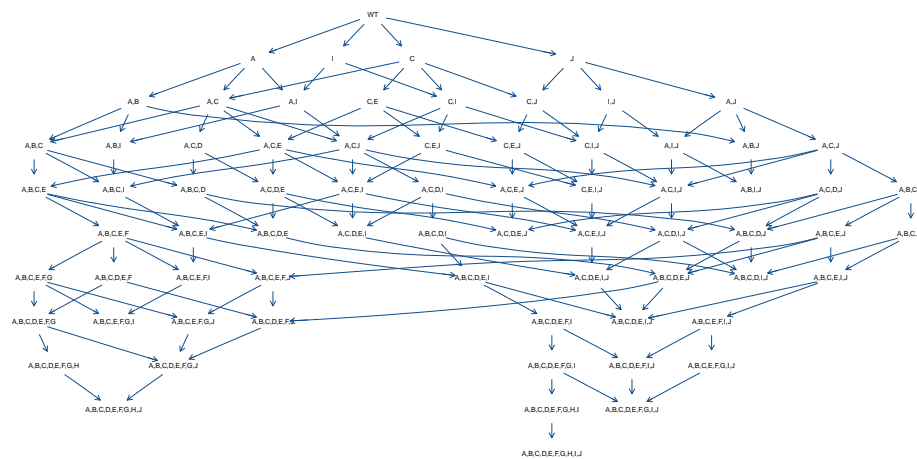

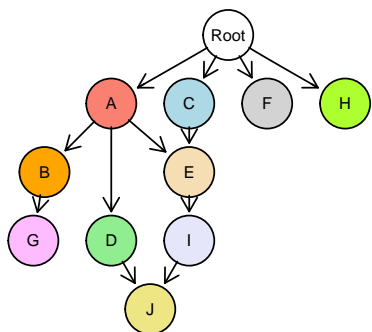

ID **AjFtq103DguBWTFWLW**  
 acc genotypes **116**  
 peaks no back **10**  
 removed edges **74**  
 prop rem edges **0.223**

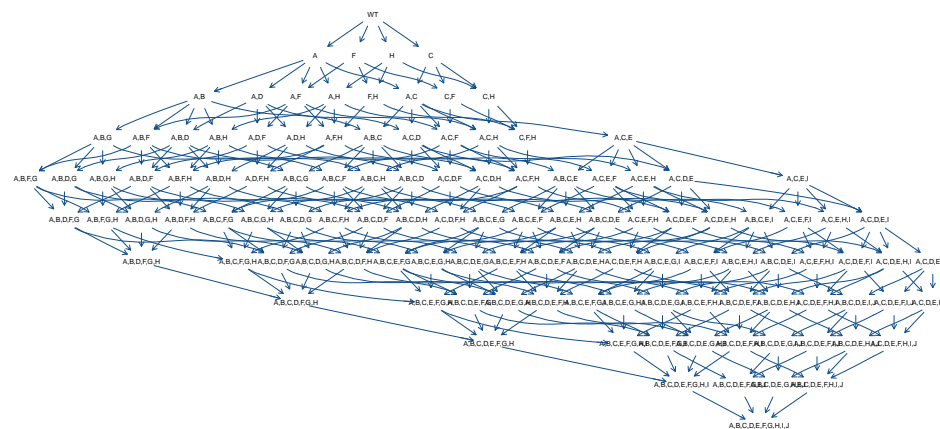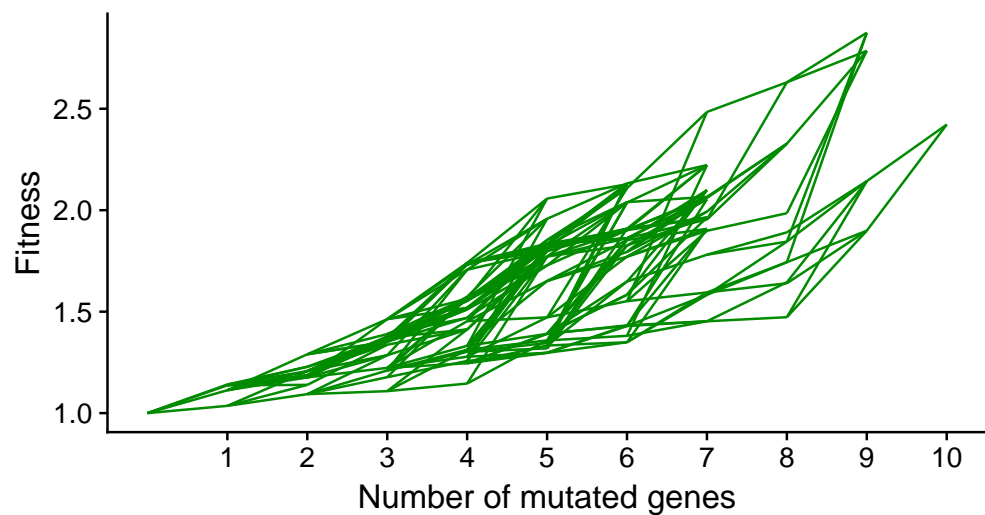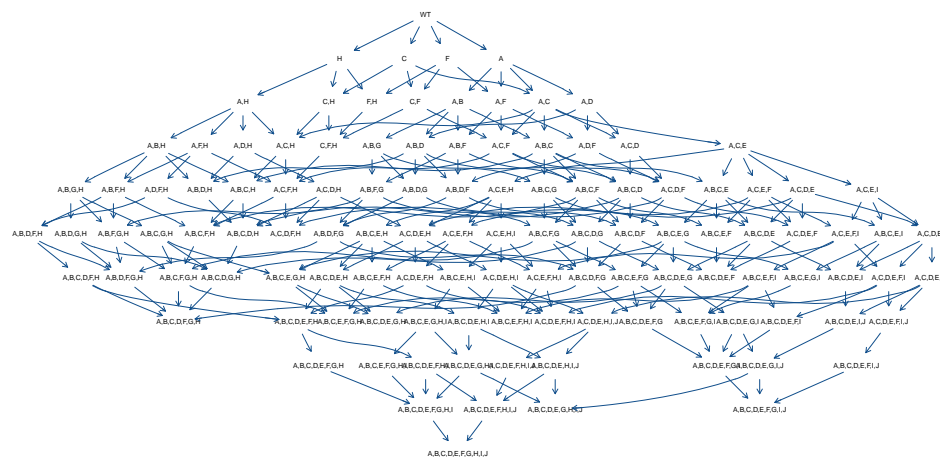

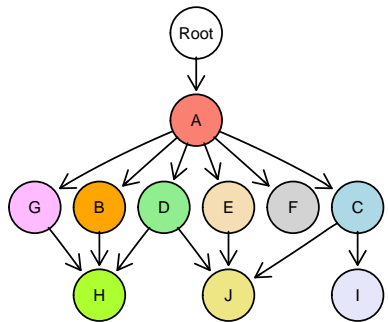

ID **B10D8cwK5cY9qVLNq**  
 acc genotypes **129**  
 peaks no back **13**  
 removed edges **86**  
 prop rem edges **0.217**

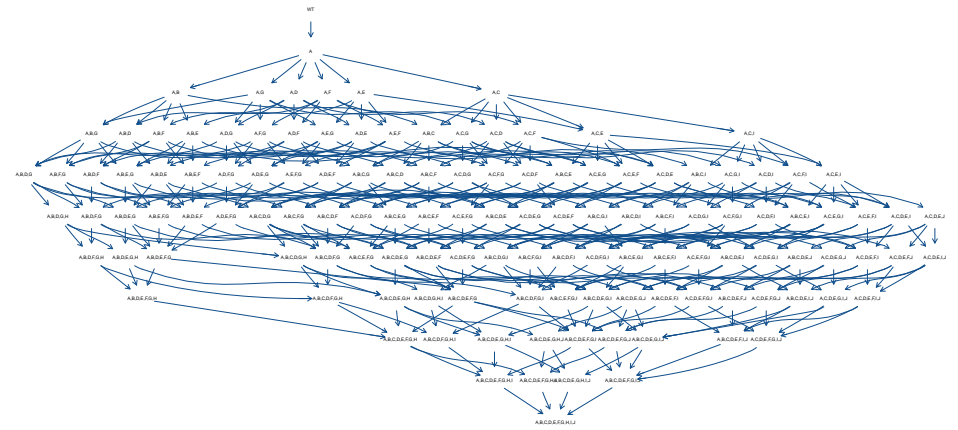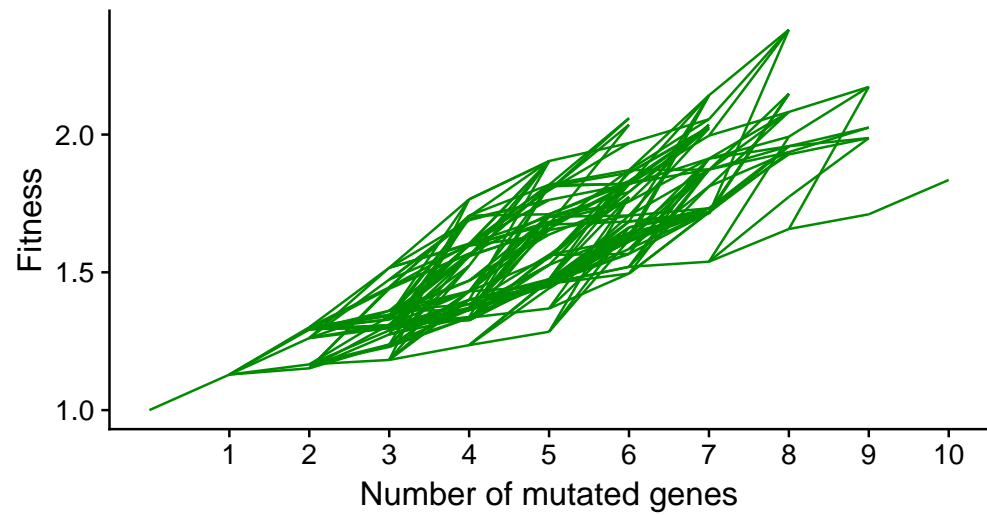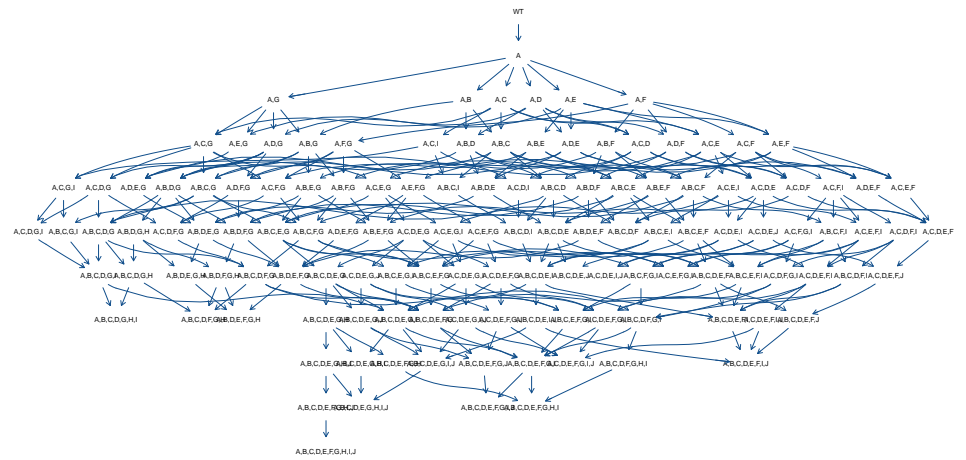

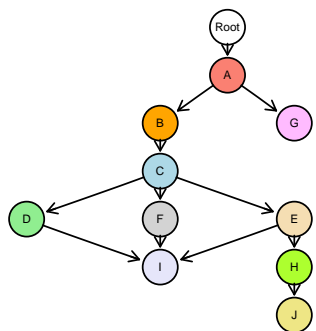

ID **b2dBTAqsSxgbkkTE**  
 acc genotypes **43**  
 peaks no back **7**  
 removed edges **14**  
 prop rem edges **0.152**

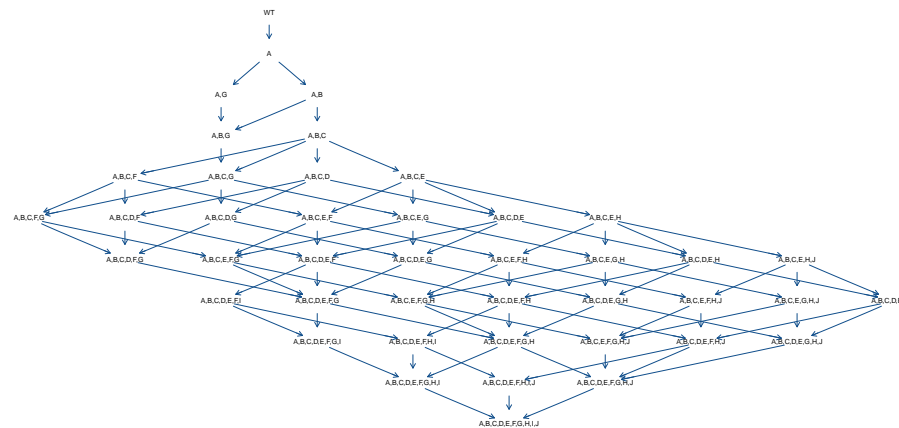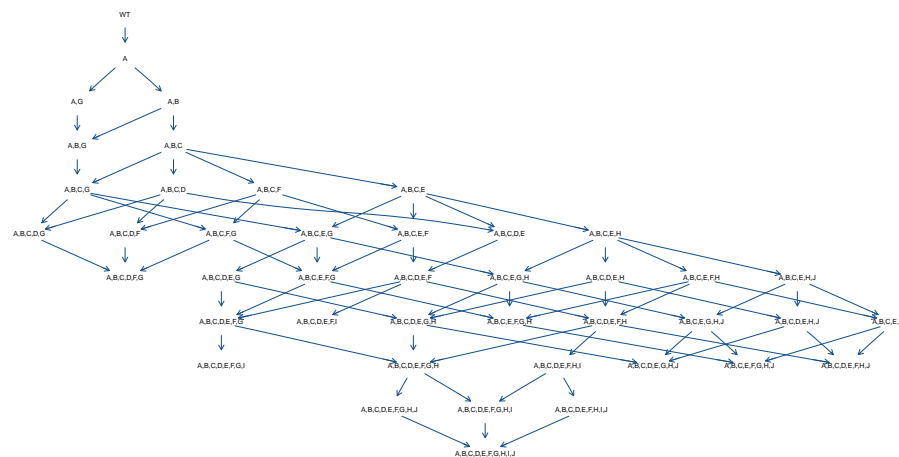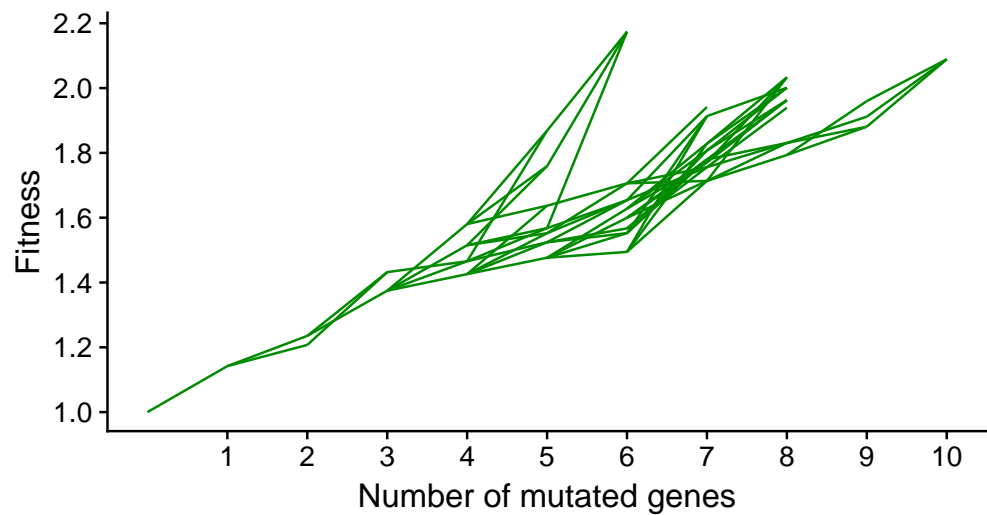

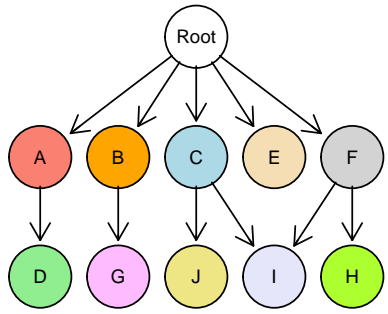

ID **B8LF4EJa7H2B21J3**  
 acc genotypes **234**  
 peaks no back 14  
 removed edges 130  
 prop rem edges 0.165

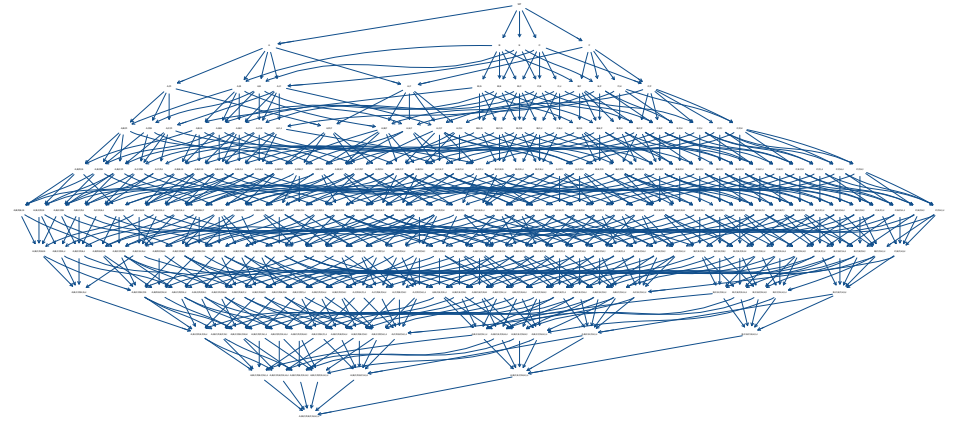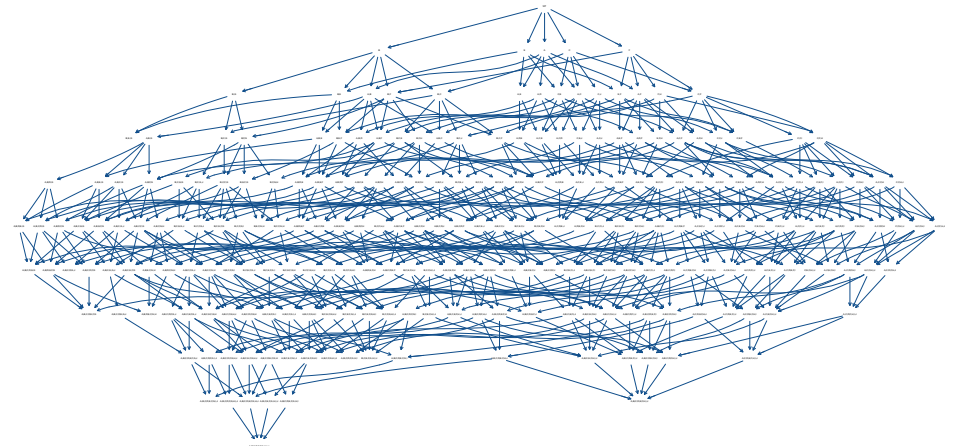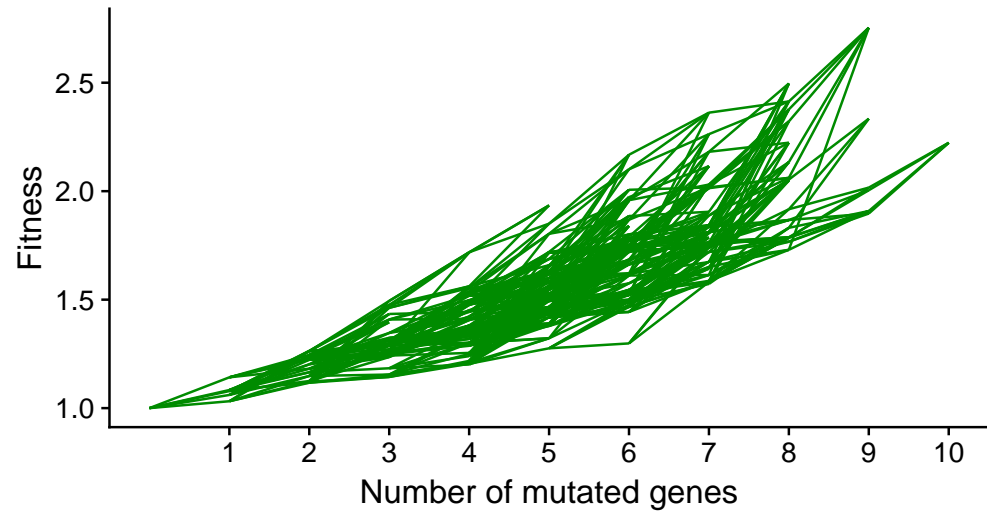



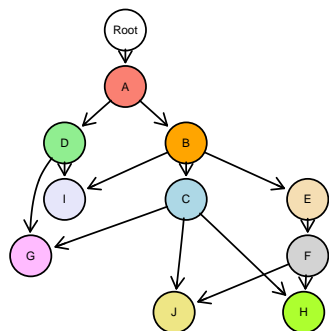

ID BoCaqtWu6XR9fw10u  
 acc genotypes 42  
 peaks no back 9  
 removed edges 20  
 prop rem edges 0.235

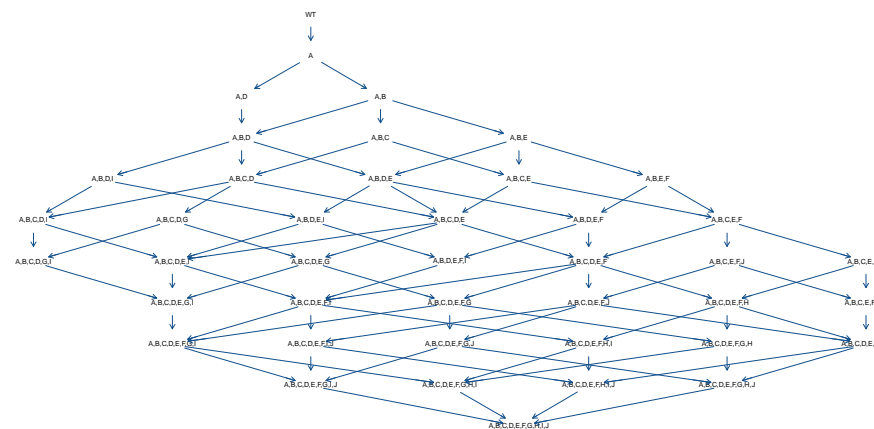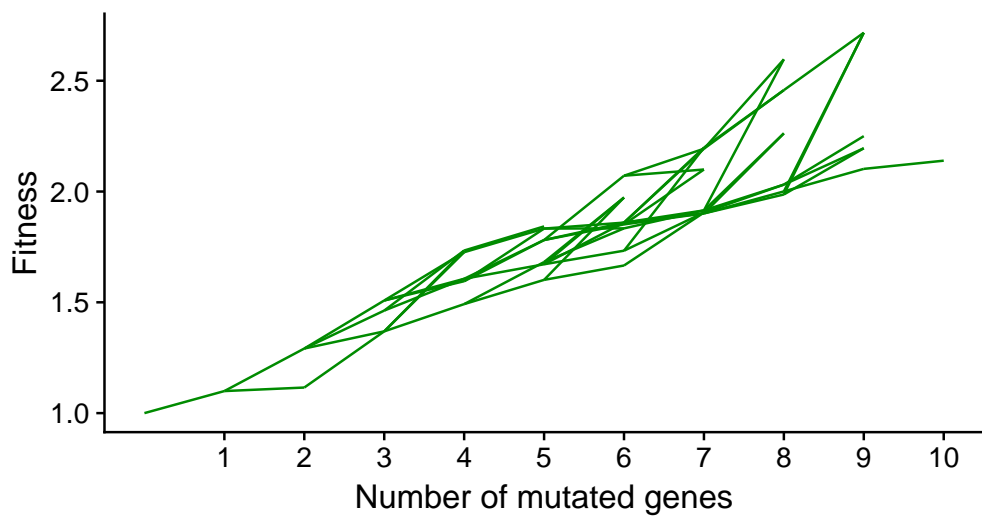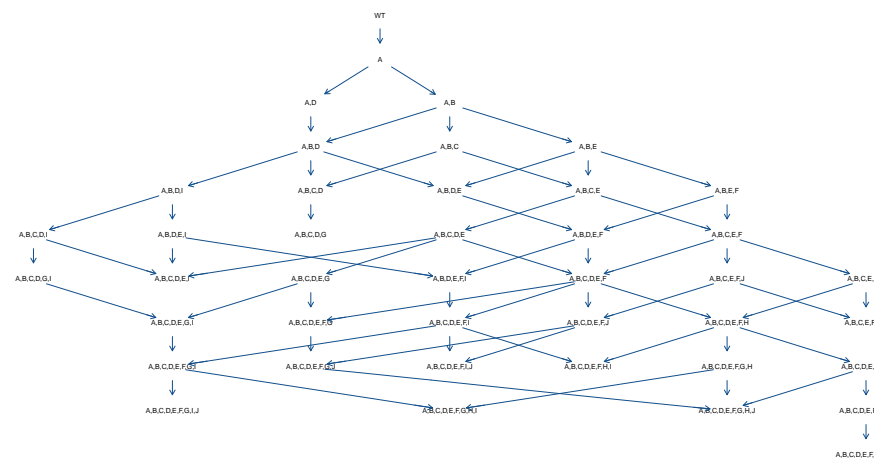

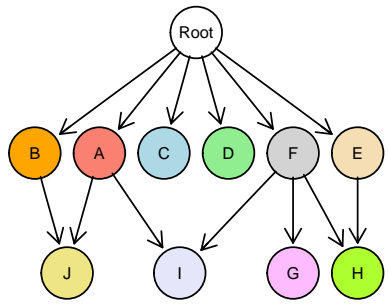

ID **BpzeoBLsEJ3xTD7v**  
 acc genotypes **232**  
 peaks no back **17**  
 removed edges **155**  
 prop rem edges **0.195**

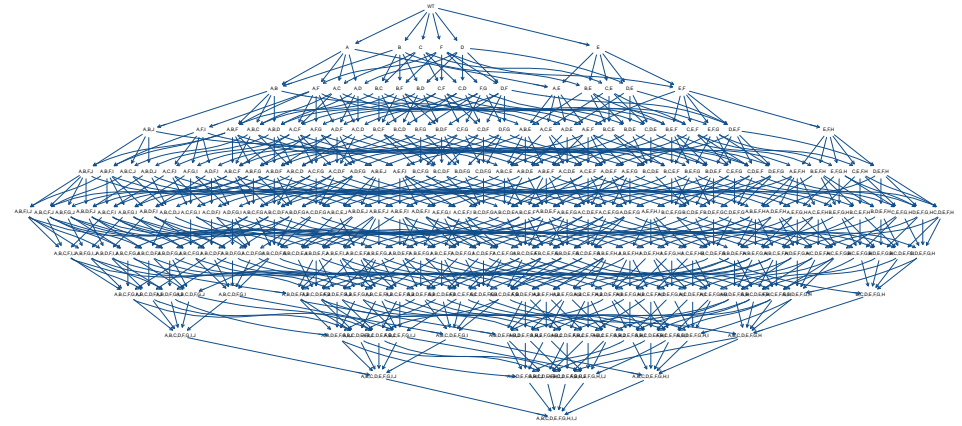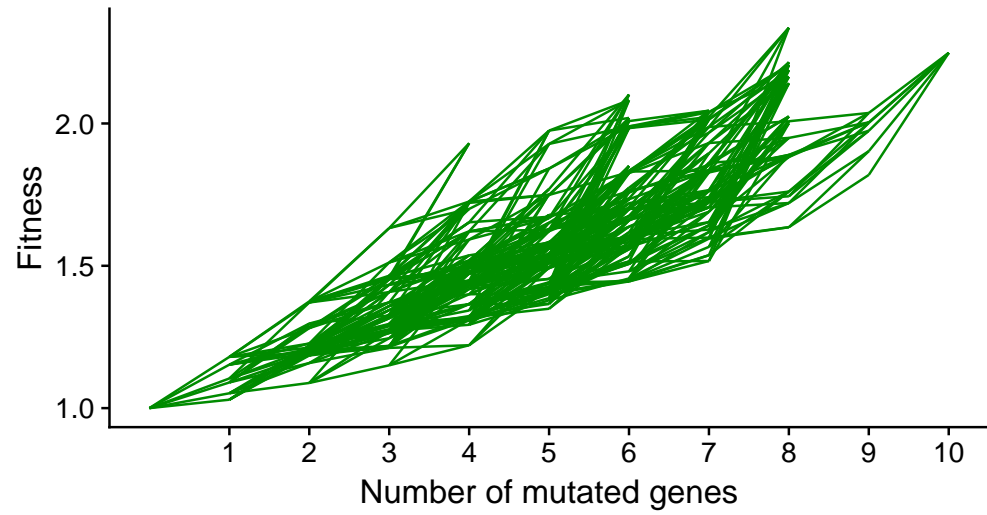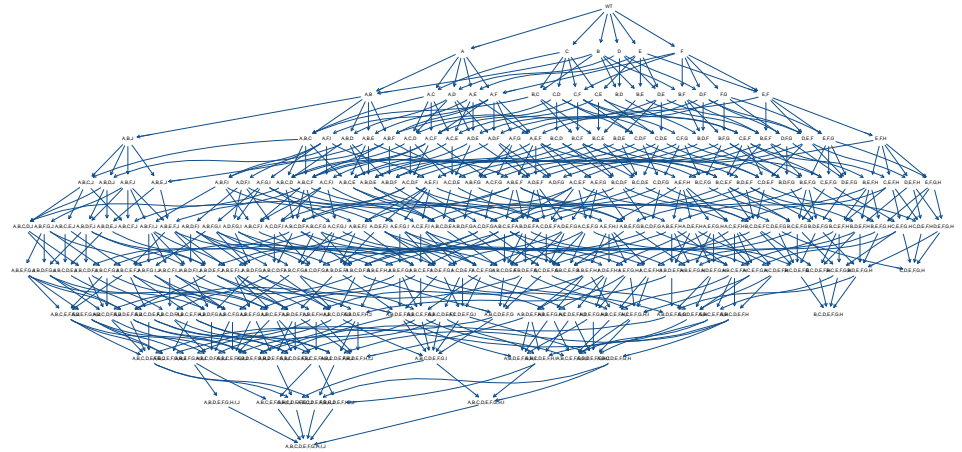

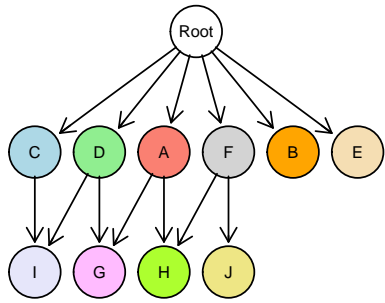

ID **Bqkt5YbsNE7niJz9**  
 acc genotypes **220**  
 peaks no back **19**  
 removed edges **183**  
 prop rem edges **0.247**

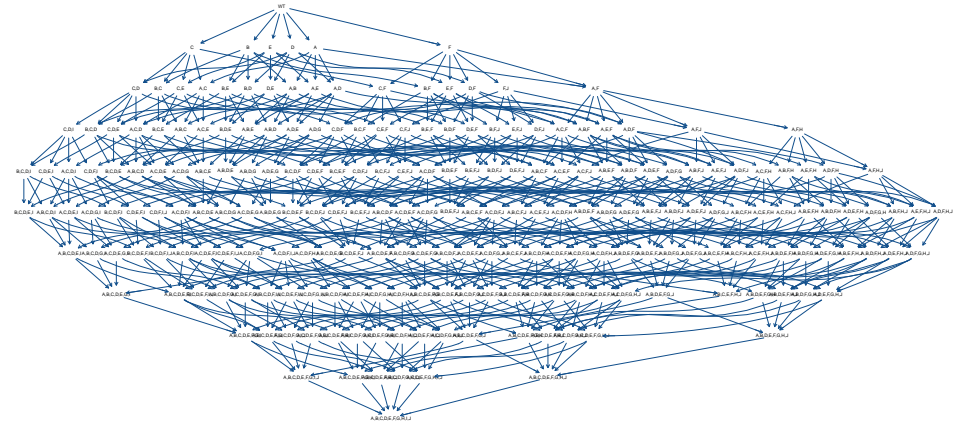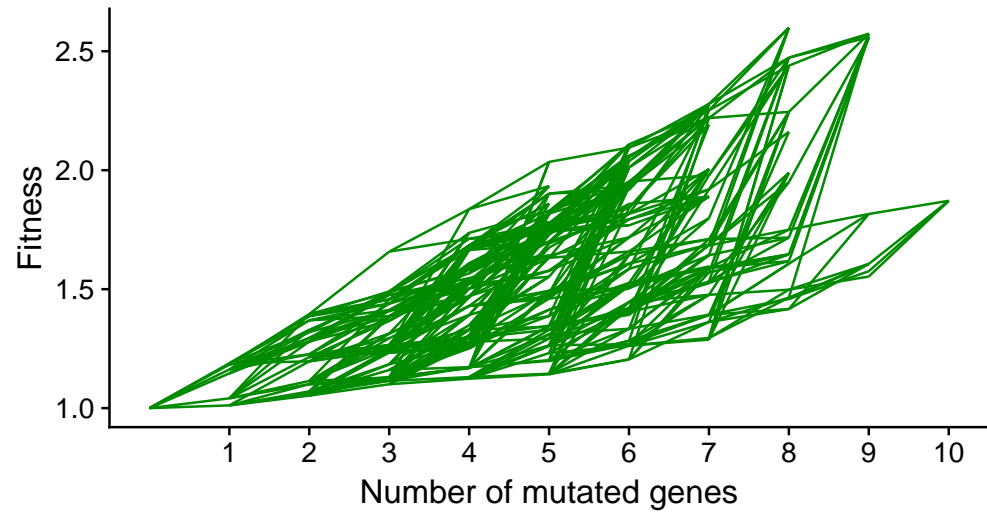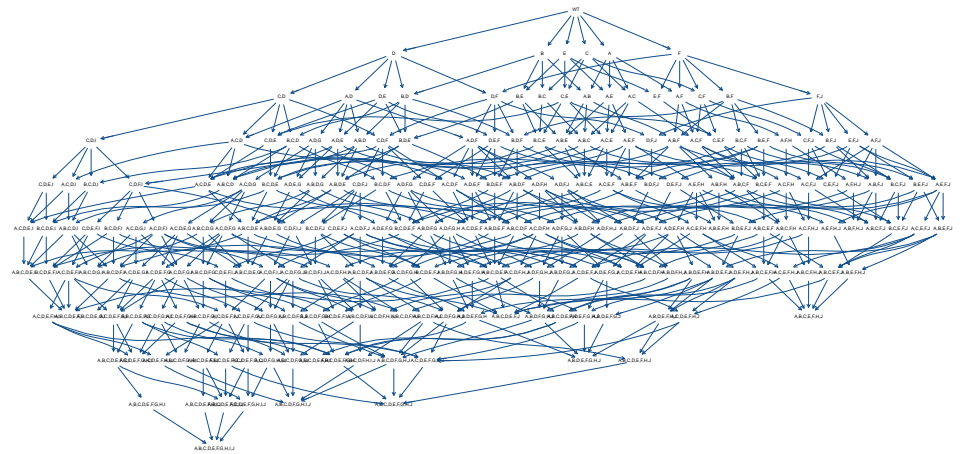

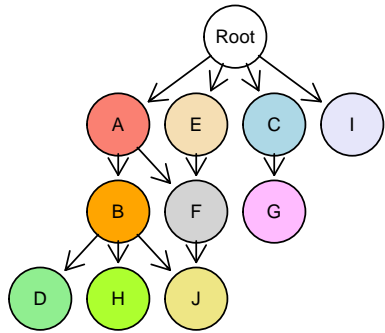

ID **c10jyy6210kvQdZBVg**  
 acc genotypes **126**  
 peaks no back **16**  
 removed edges **70**  
 prop rem edges **0.193**

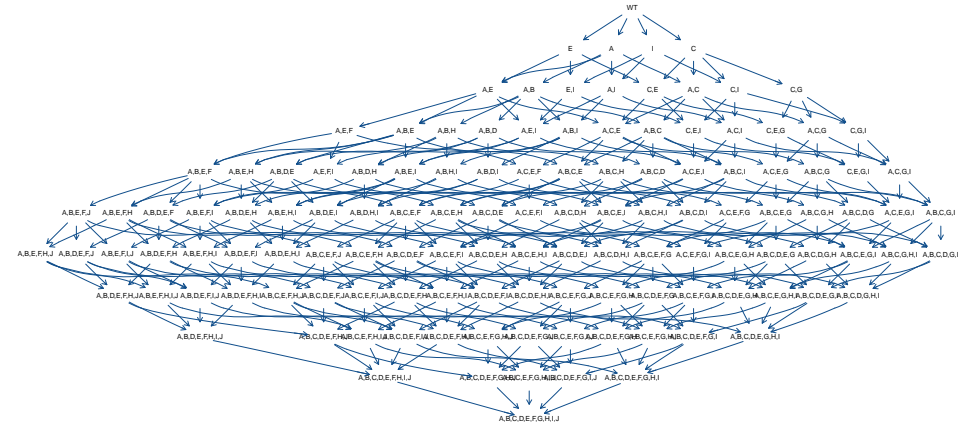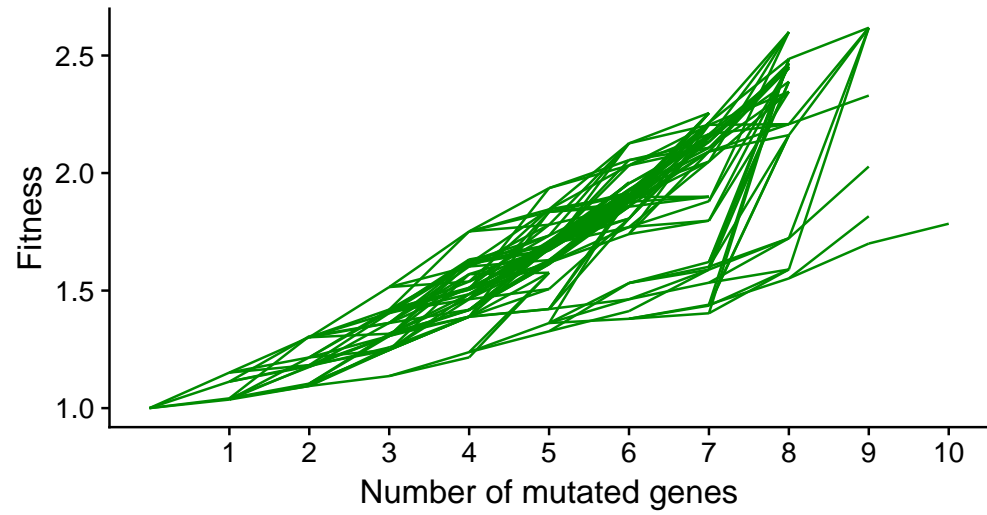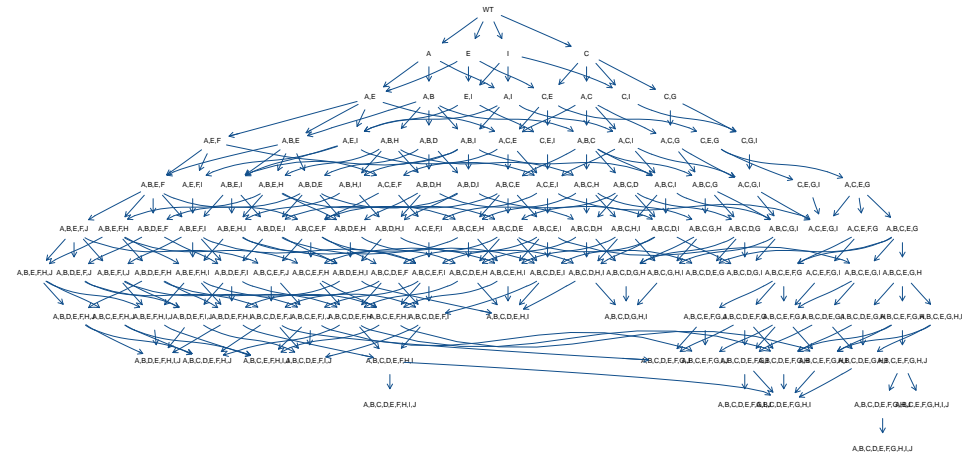

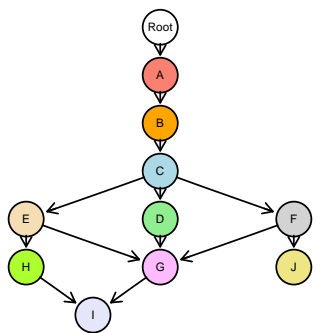

ID C4drUyloTXoBU6JC  
 acc genotypes 27  
 peaks no back 4  
 removed edges 9  
 prop rem edges 0.191

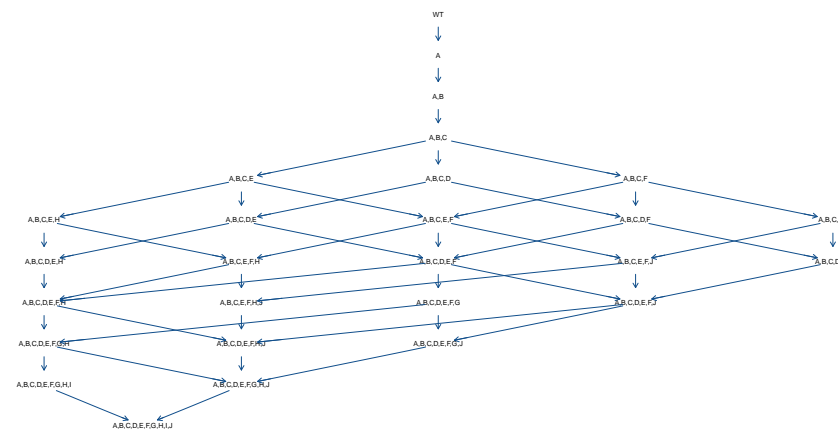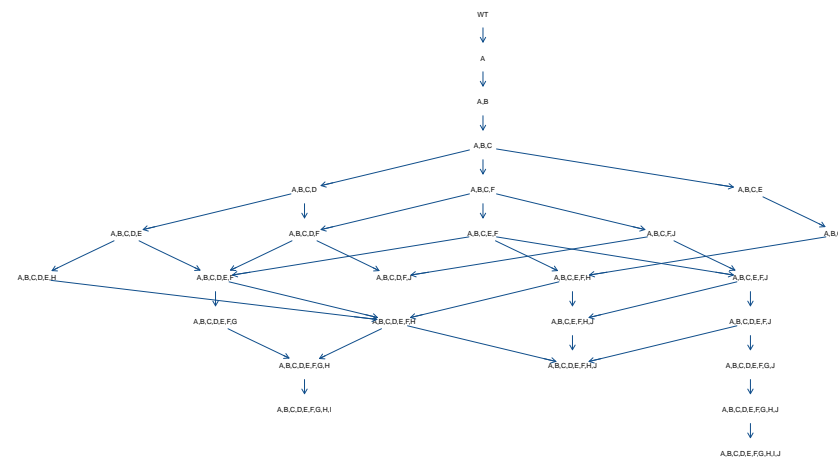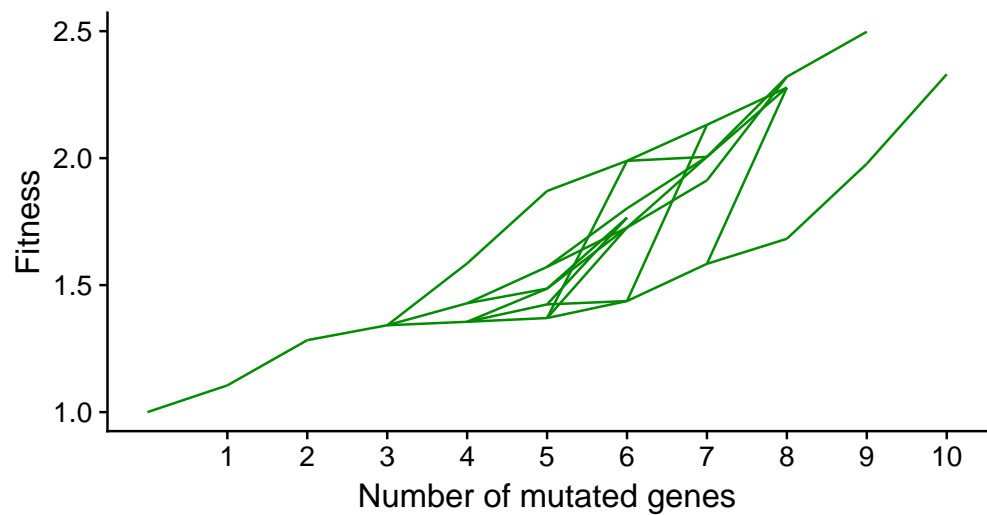

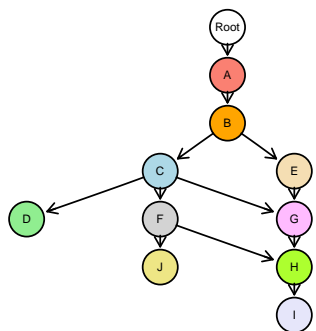

ID **CDprcl8u4ZcaFn7F**  
 acc genotypes **30**  
 peaks no back **4**  
 removed edges **6**  
 prop rem edges **0.111**

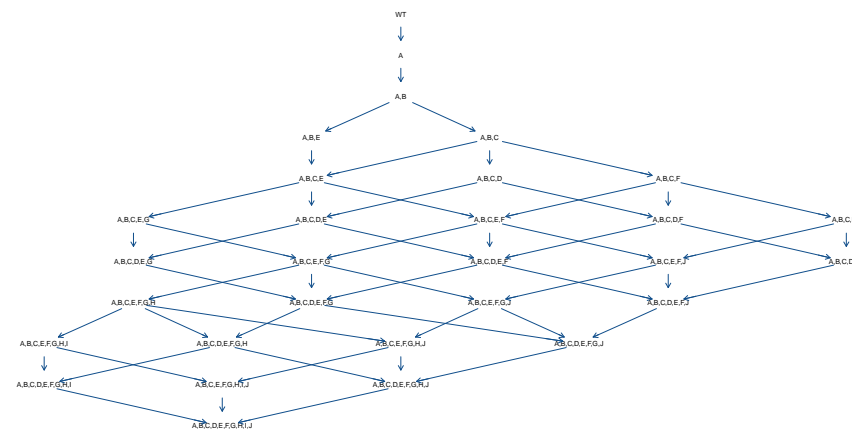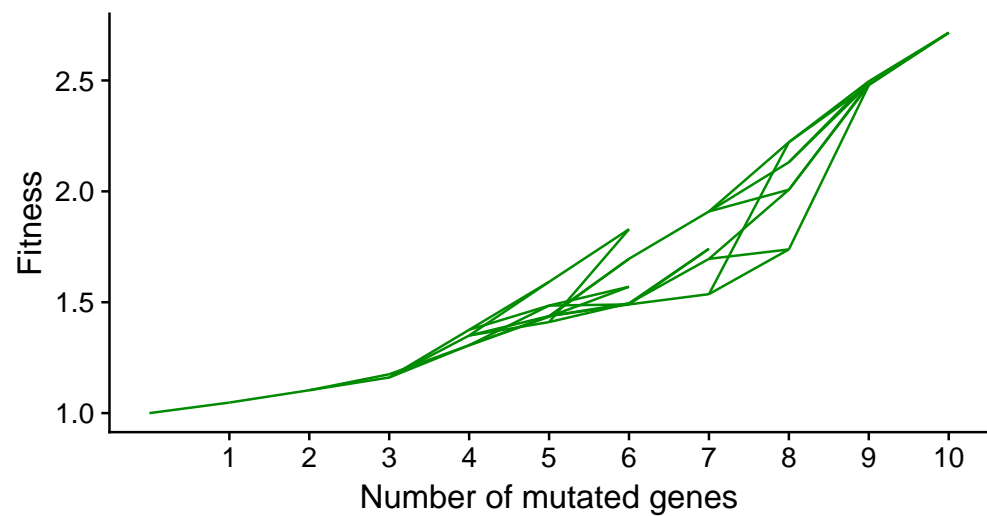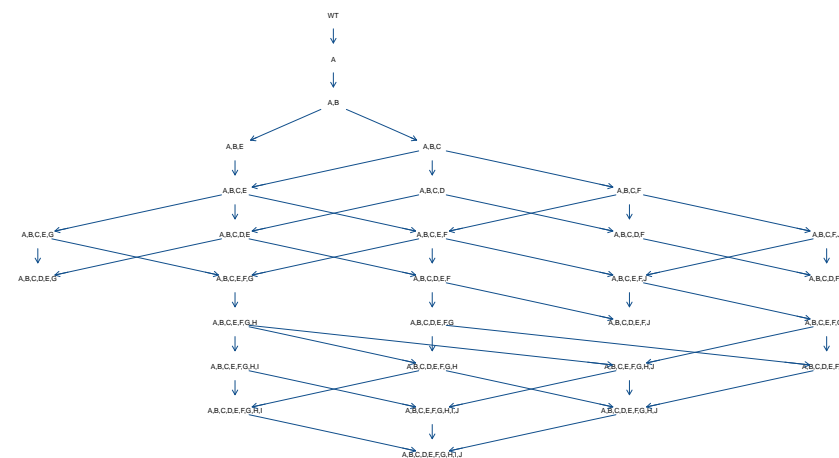

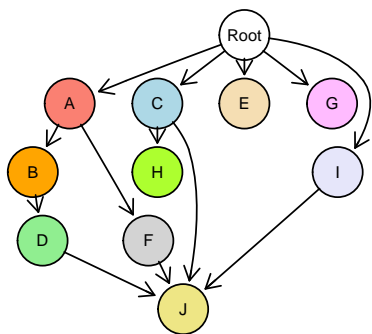

ID **cGm7gRR3s42NqyP**  
 acc genotypes **176**  
 peaks no back **16**  
 removed edges **116**  
 prop rem edges **0.201**

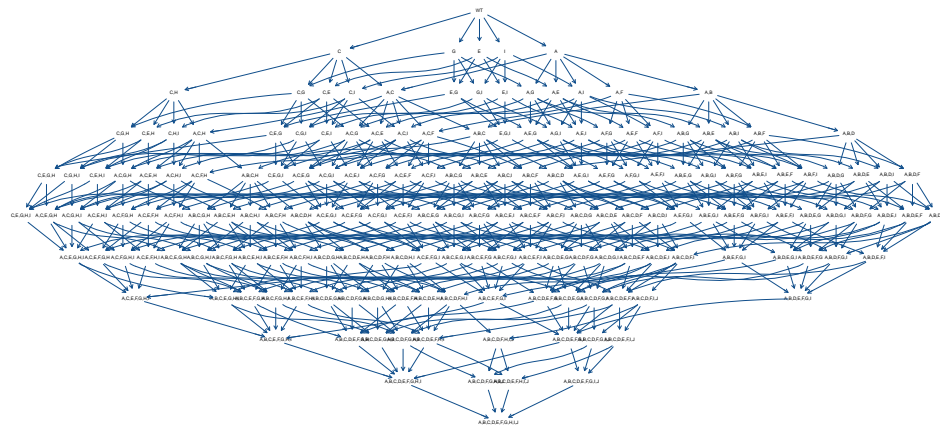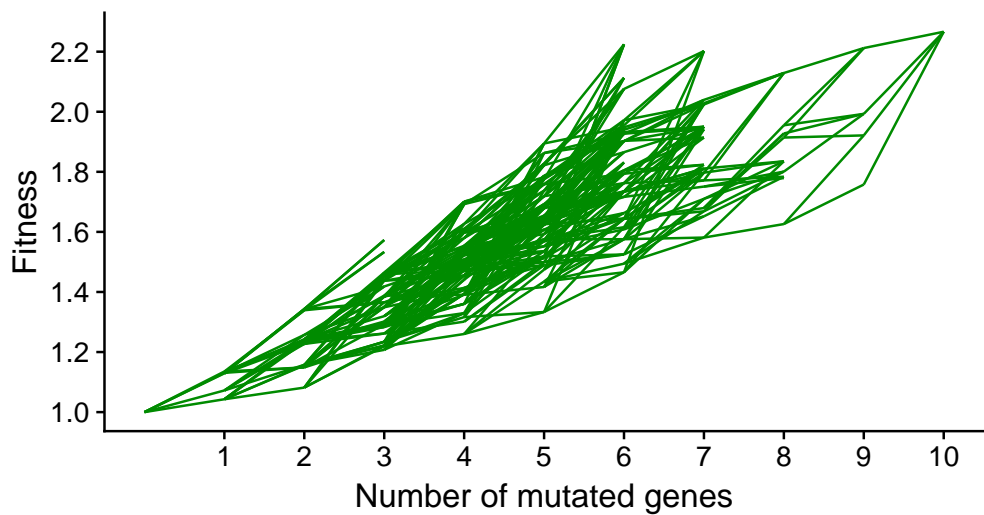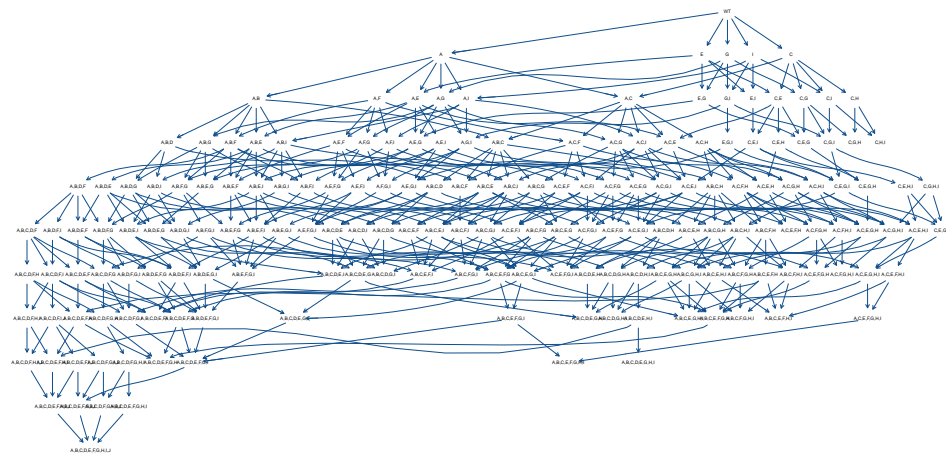

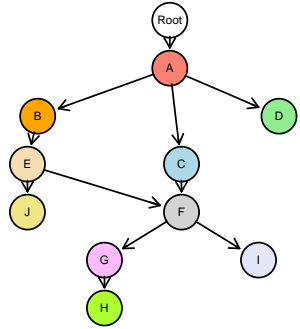

ID CjDx5CPhar7wxbYH  
 acc genotypes 41  
 peaks no back 7  
 removed edges 22  
 prop rem edges 0.259

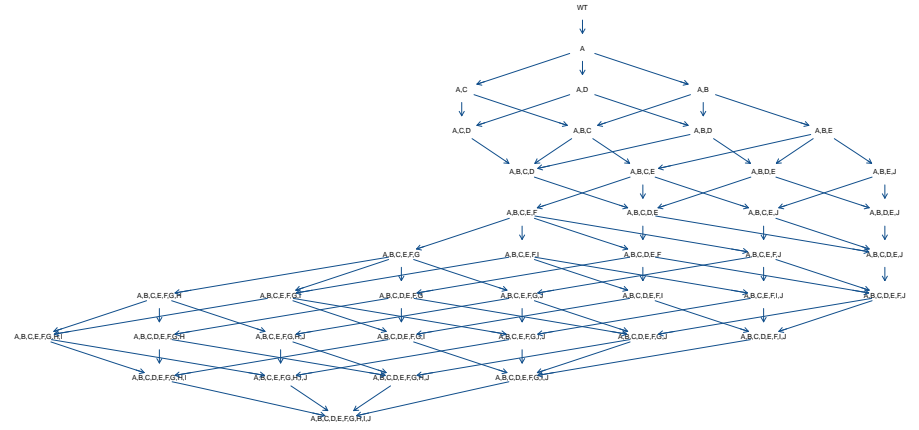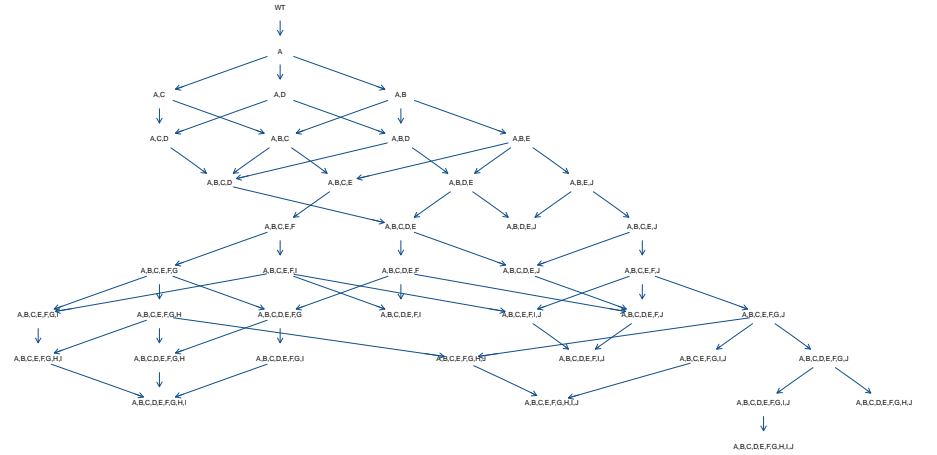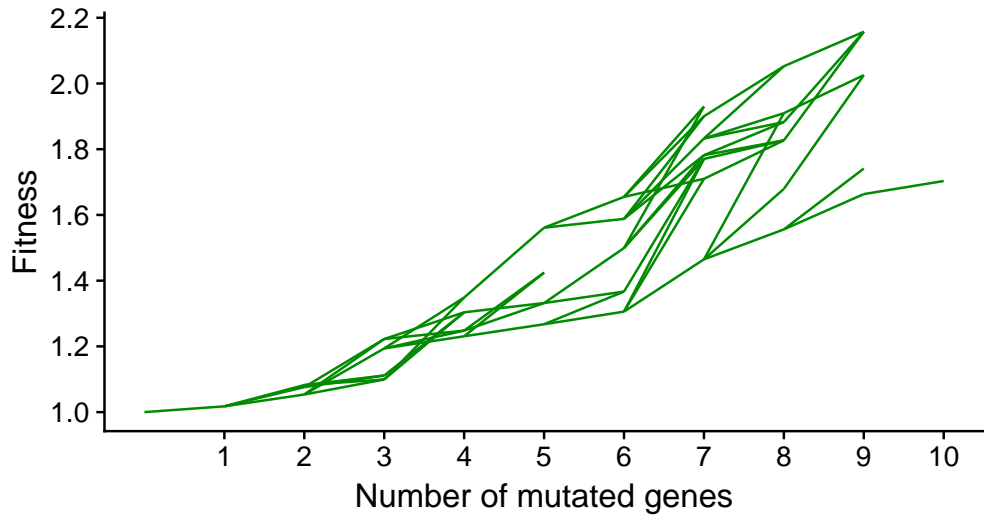



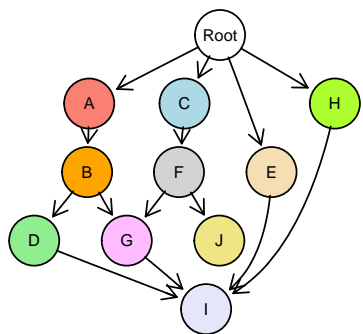

ID **dC6vMuFmbDjoadOo**  
 acc genotypes **82**  
 peaks no back 10  
 removed edges 39  
 prop rem edges 0.185

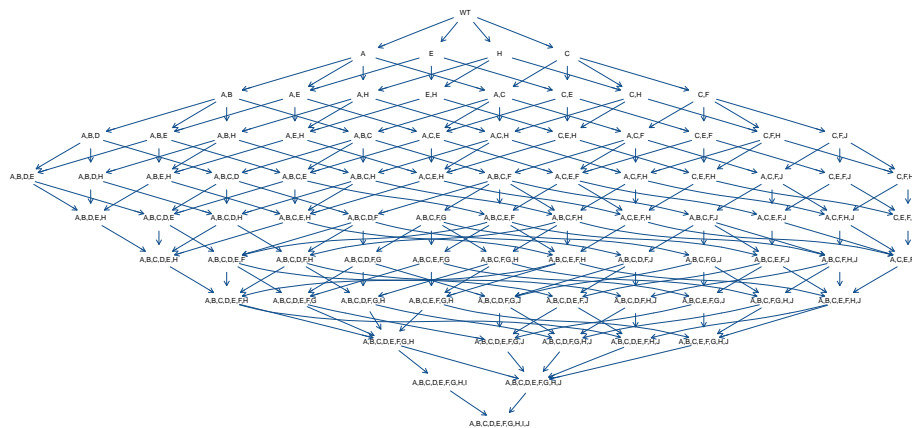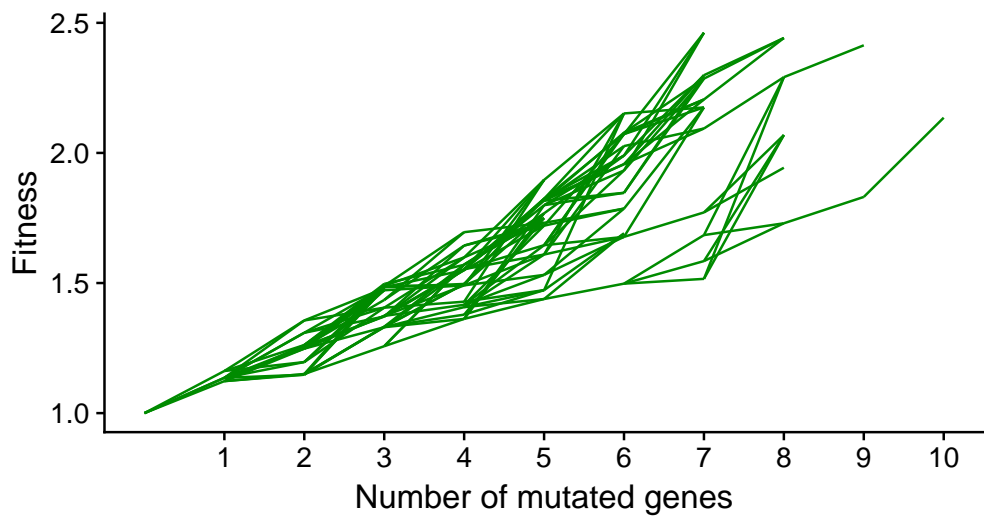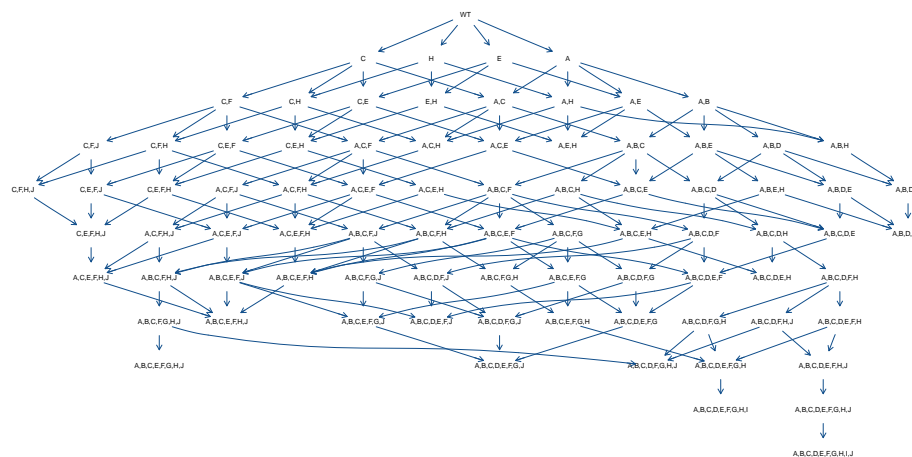

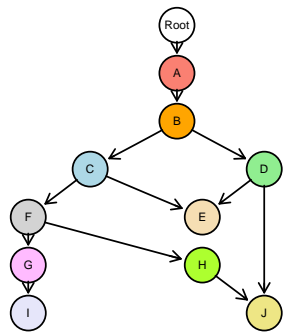

ID **DcAnAY4JLfHe55I**  
 acc genotypes **31**  
 peaks no back **4**  
 removed edges **8**  
 prop rem edges **0.143**

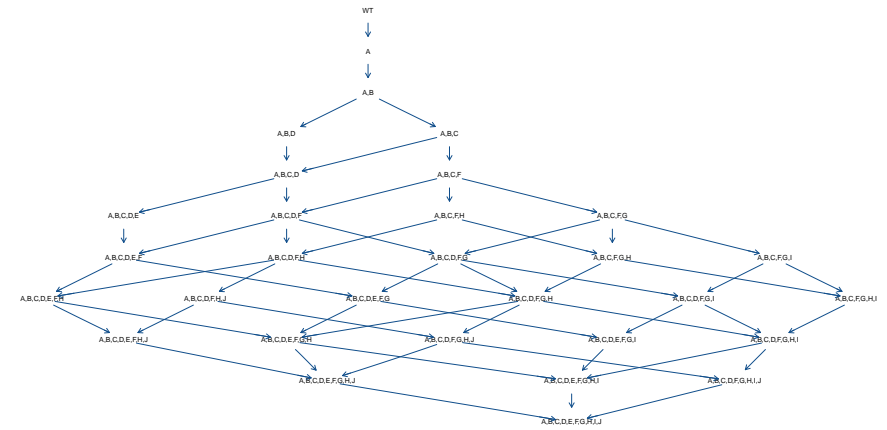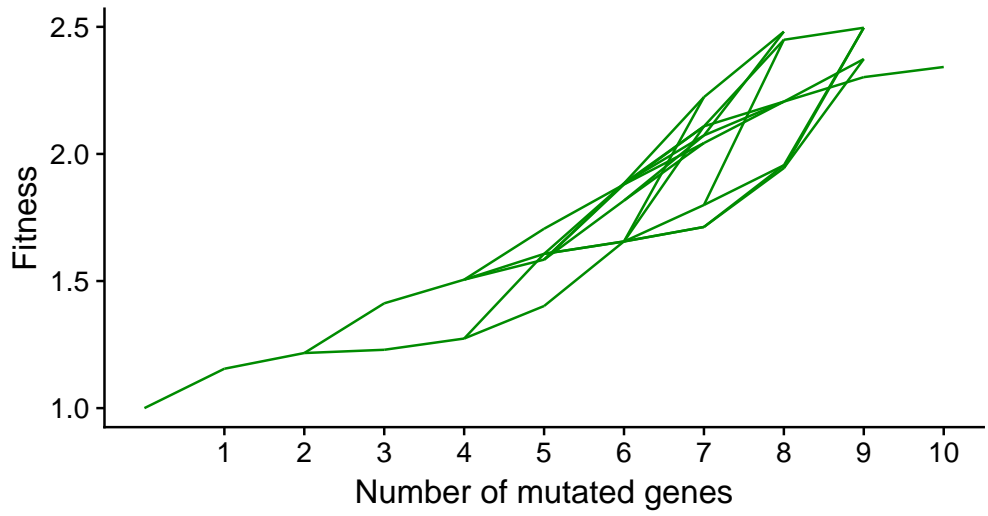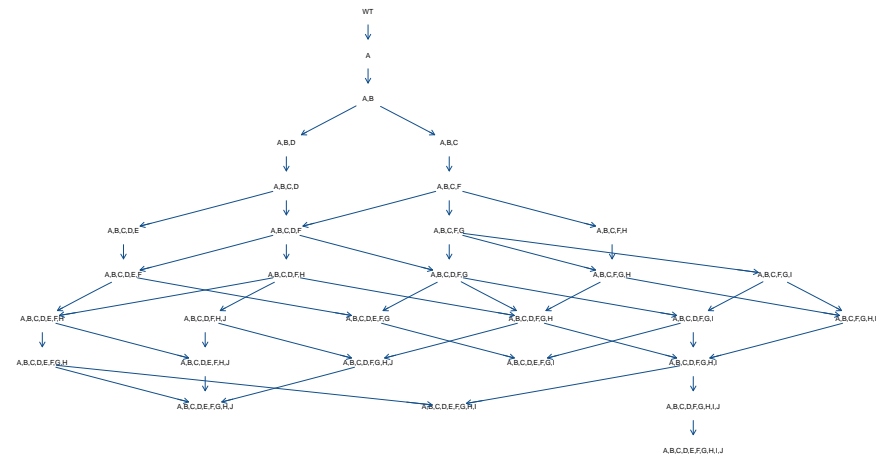

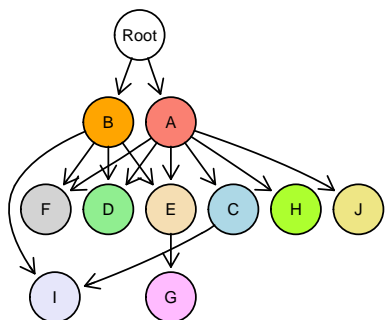

ID dDZ4CvpAmrvxLFyS  
 acc genotypes 154  
 peaks no back 13  
 removed edges 111  
 prop rem edges 0.221

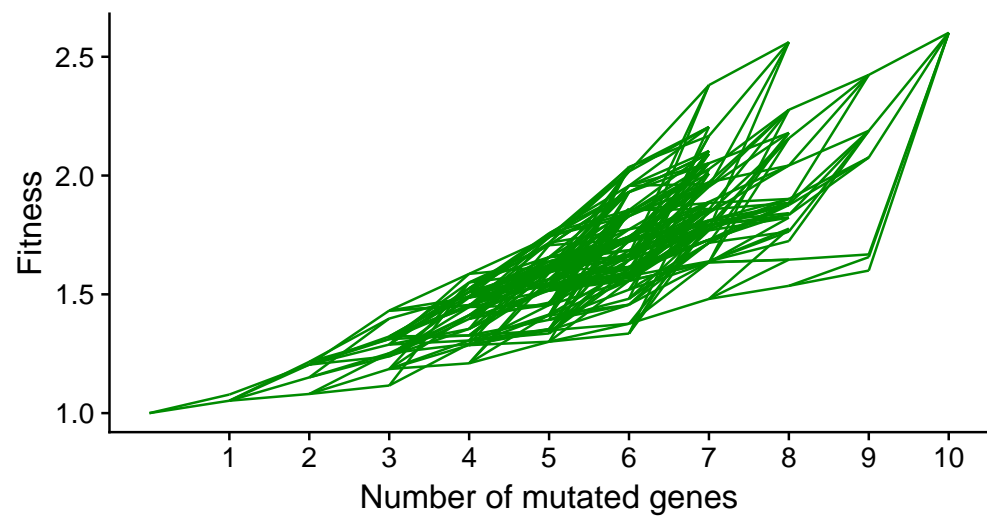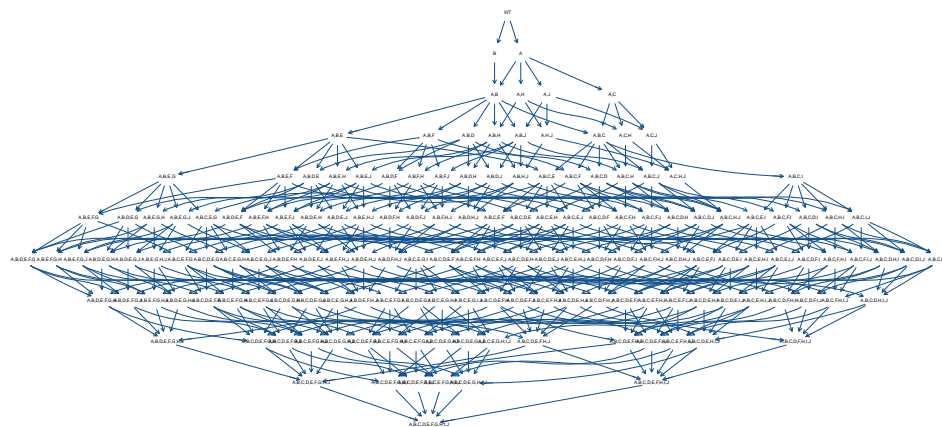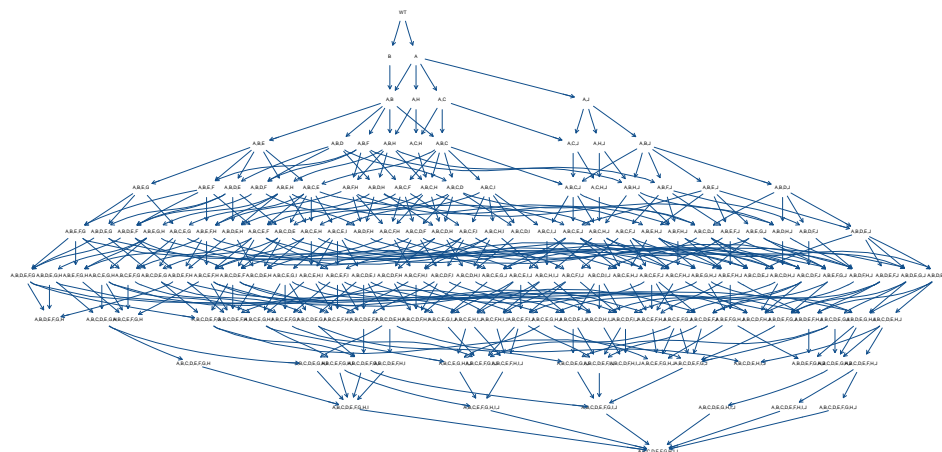

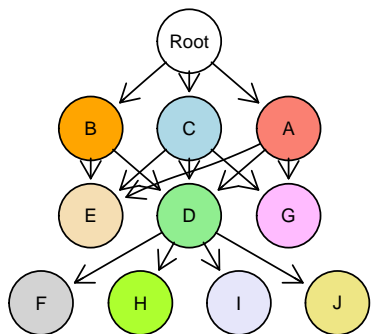

ID **DFTK3ko7MlzoABxk**  
 acc genotypes **76**  
 peaks no back **9**  
 removed edges **40**  
 prop rem edges **0.187**

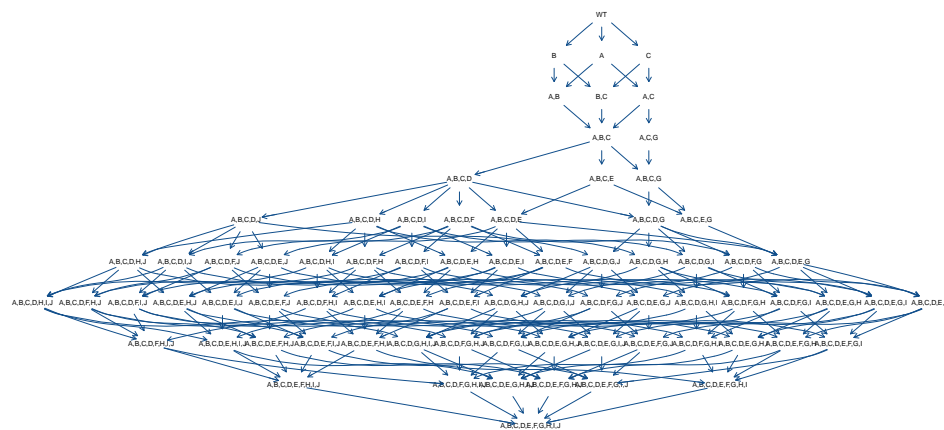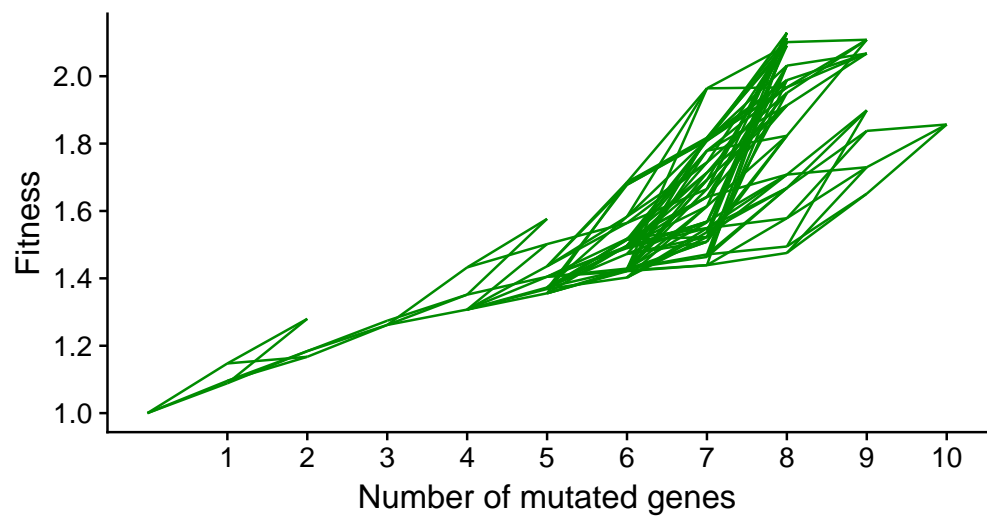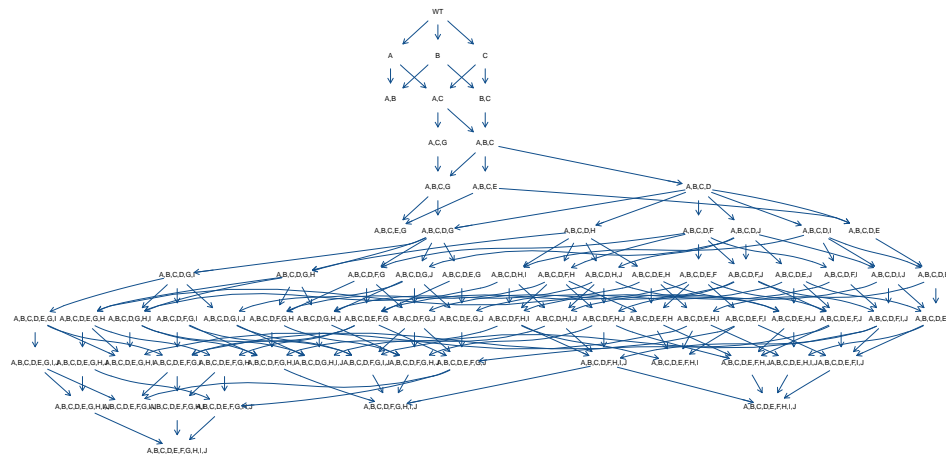

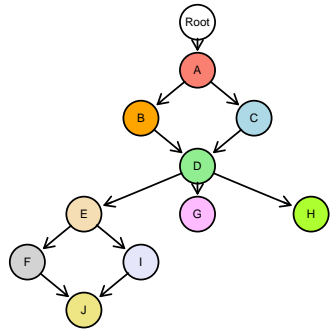

ID **DXTB5tpZMuV2IF2I**  
 acc genotypes **29**  
 peaks no back **5**  
 removed edges **8**  
 prop rem edges **0.148**

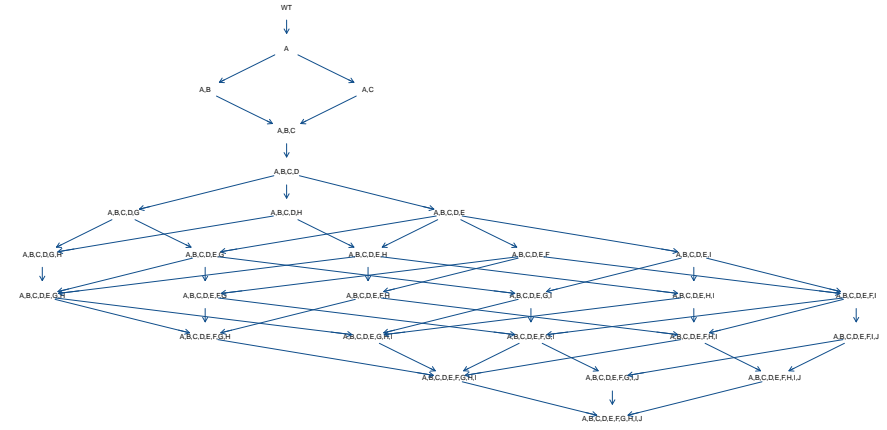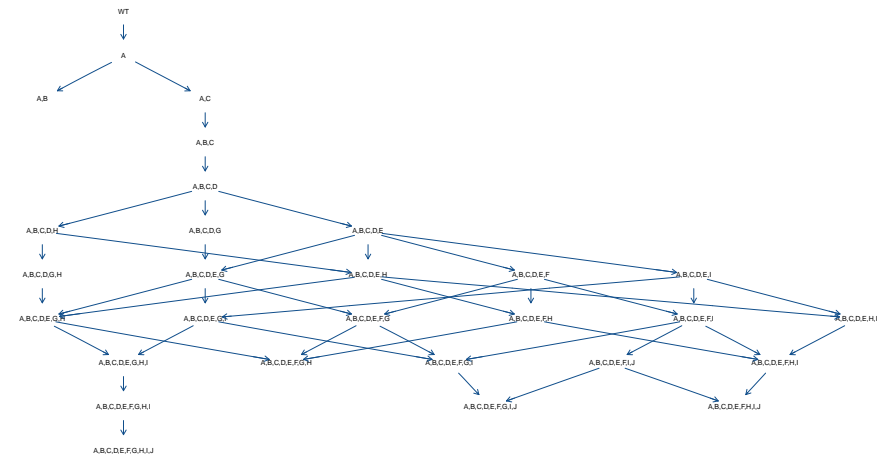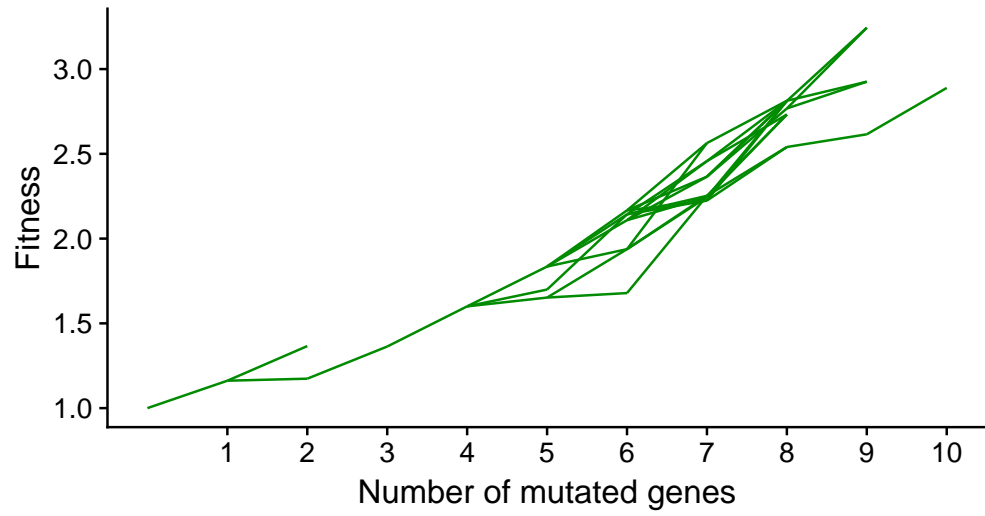

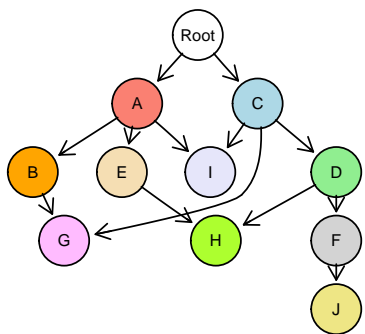

ID **dYeC4QsDciy4hwa3**  
 acc genotypes **75**  
 peaks no back **10**  
 removed edges **32**  
 prop rem edges **0.174**

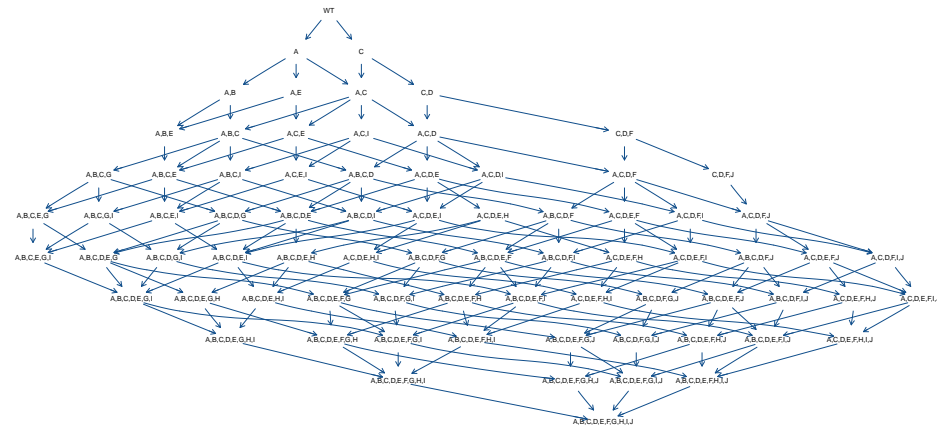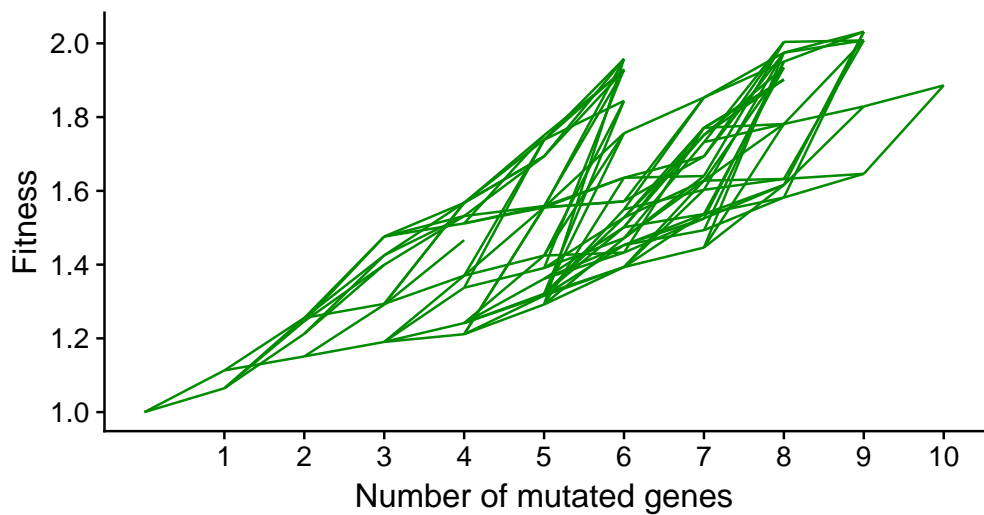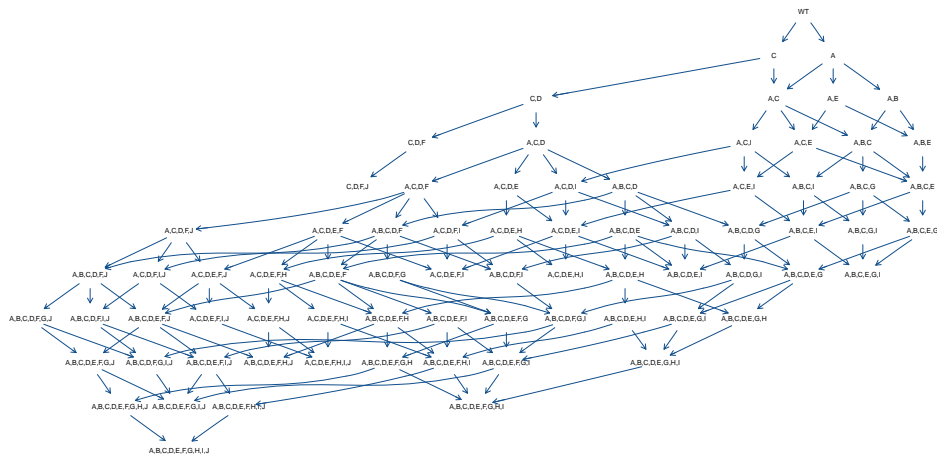

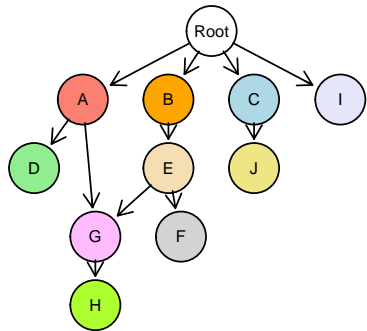

ID **E8phmTg4KHAS8DL**  
 acc genotypes **120**  
 peaks no back **12**  
 removed edges **61**  
 prop rem edges **0.18**

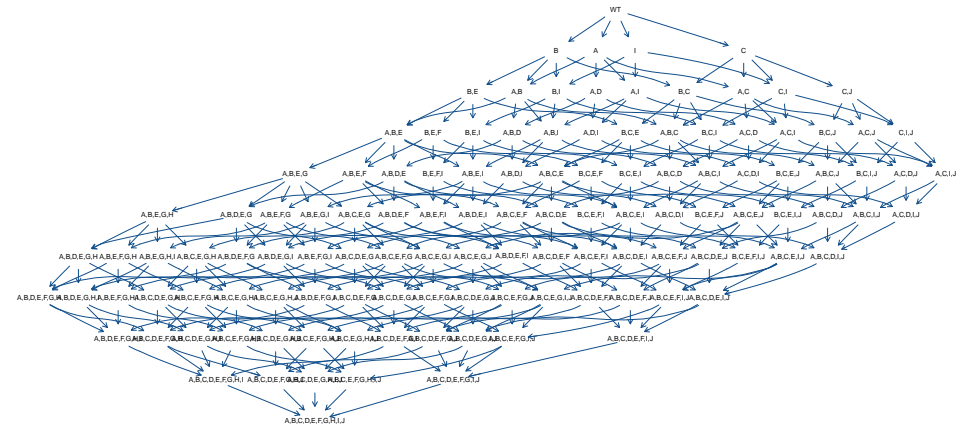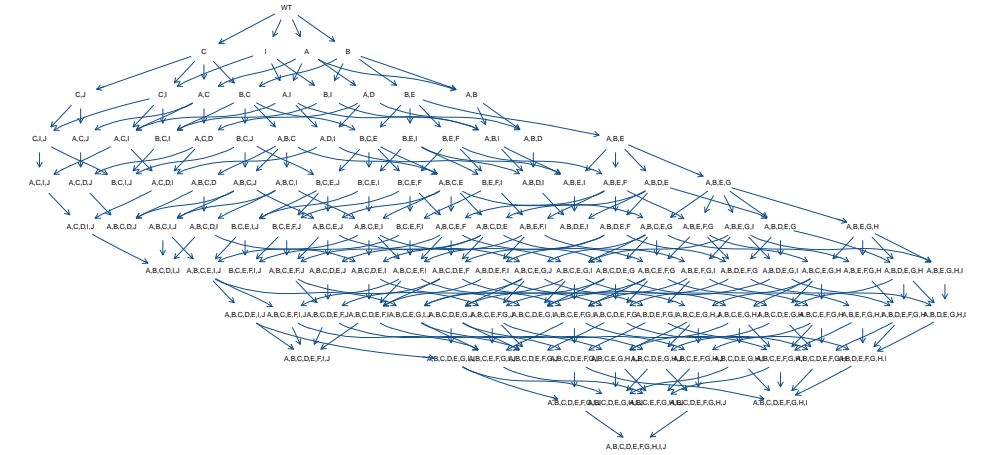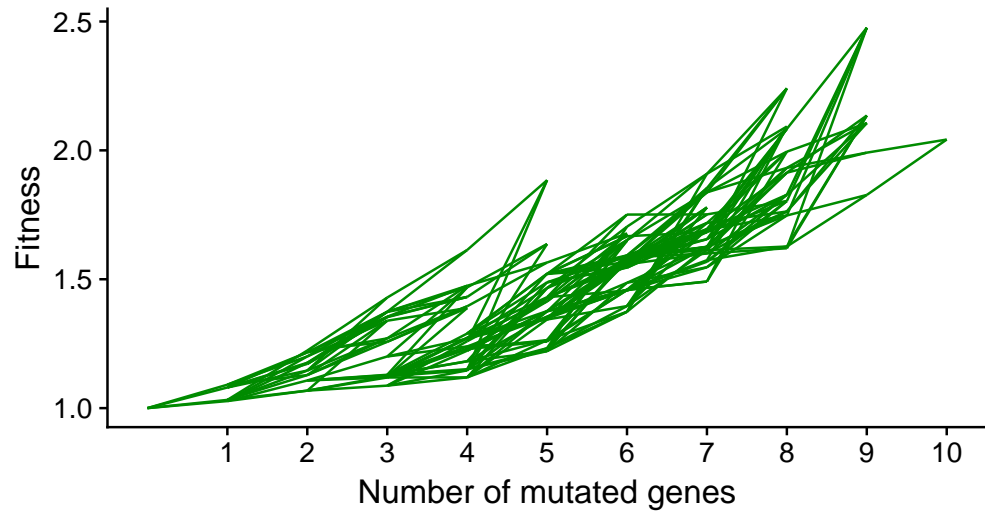

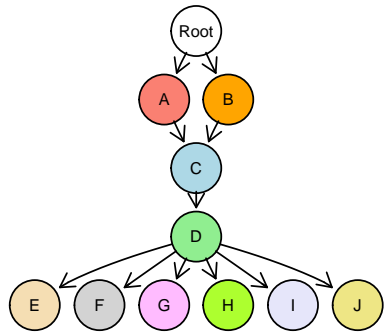

ID eBeyysHajtLINILT  
 acc genotypes 69  
 peaks no back 8  
 removed edges 35  
 prop rem edges 0.177

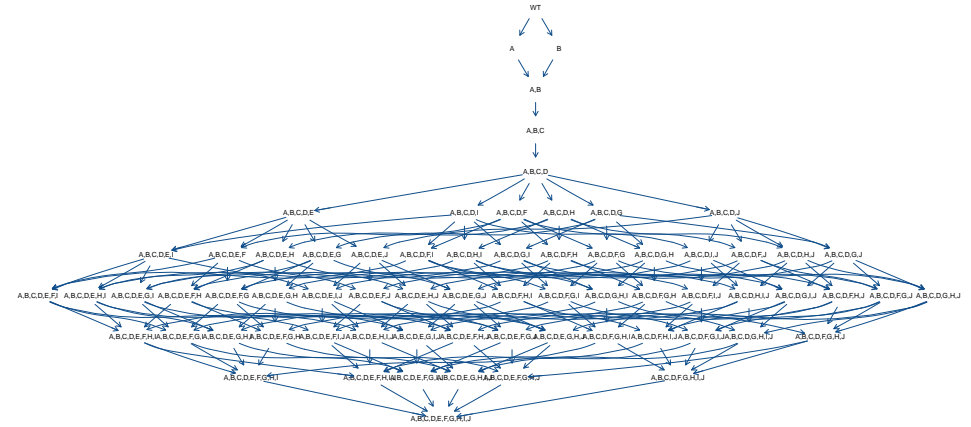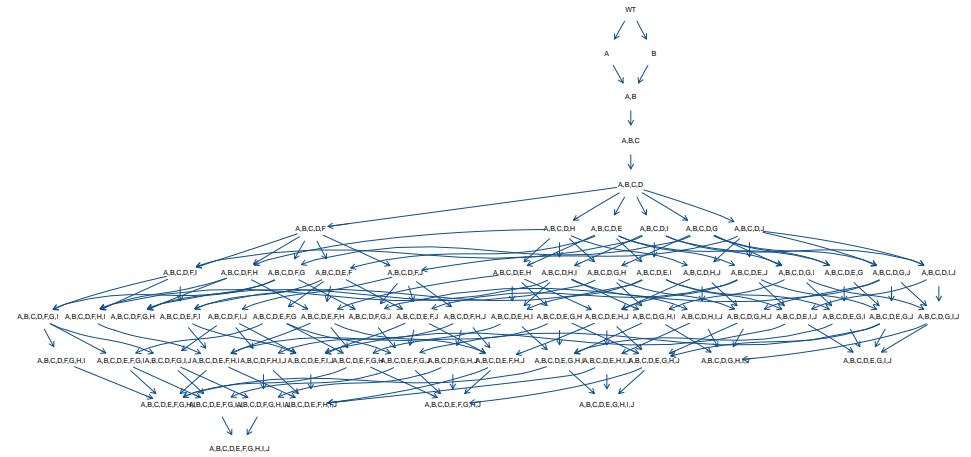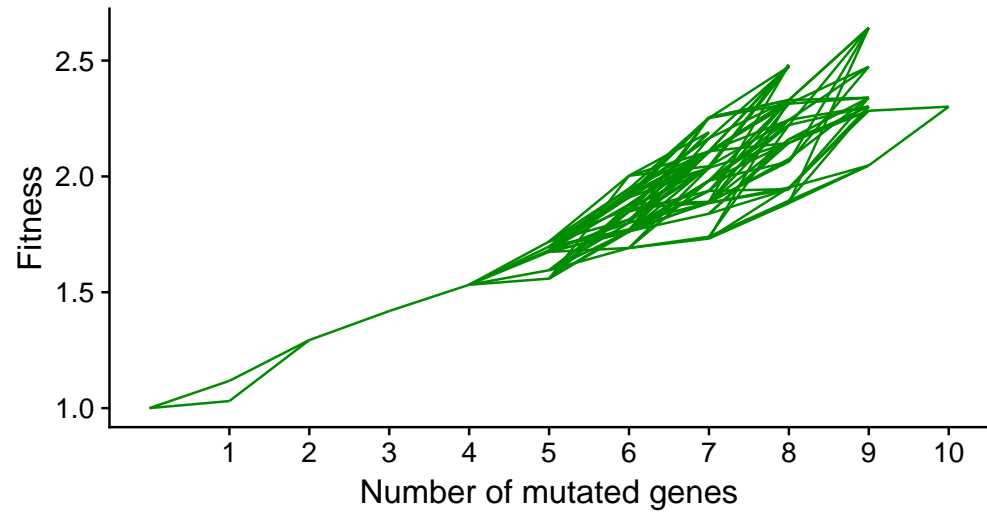



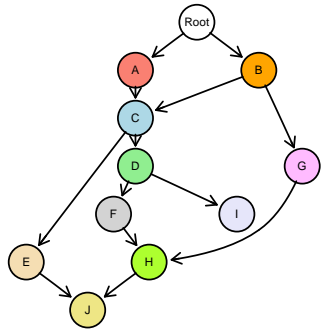

ID [EflrY474a8aE1bD2](#)  
 acc genotypes 32  
 peaks no back 5  
 removed edges 8  
 prop rem edges 0.133

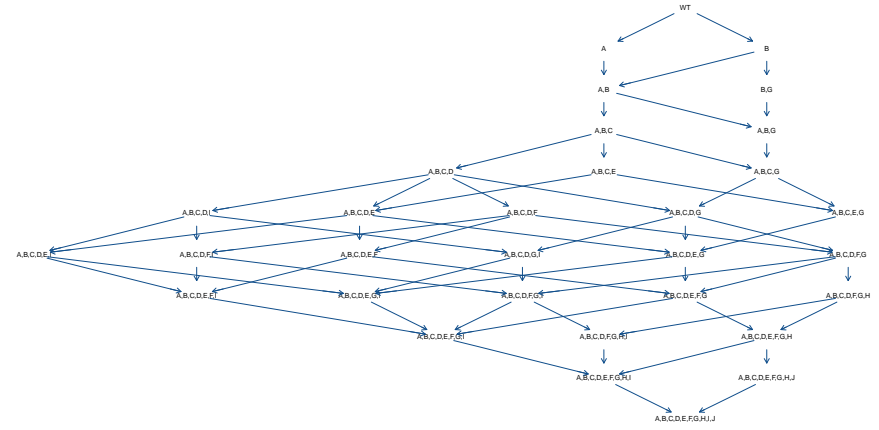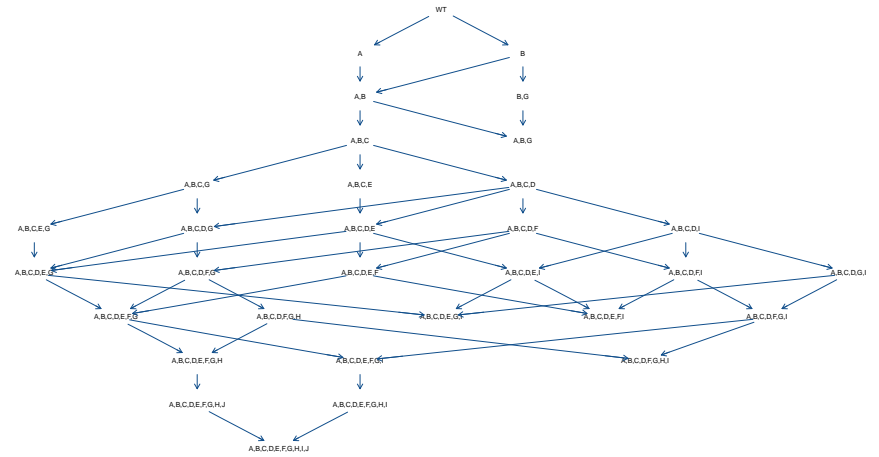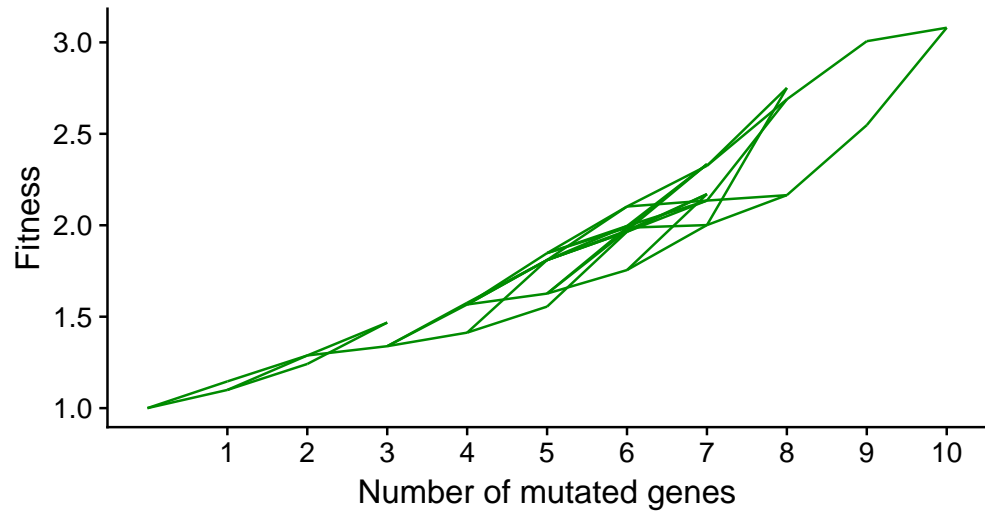

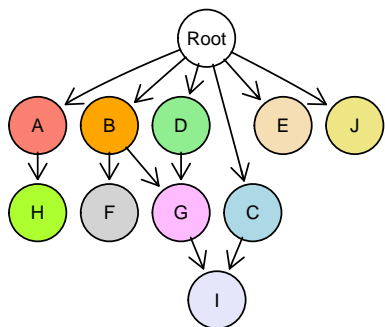

ID EjeOkmz5yWV10GMyo  
 acc genotypes 216  
 peaks no back 14  
 removed edges 134  
 prop rem edges 0.183

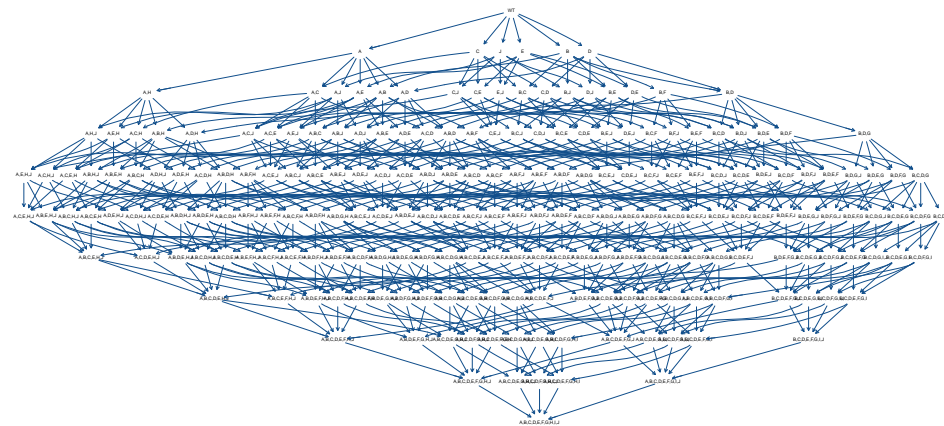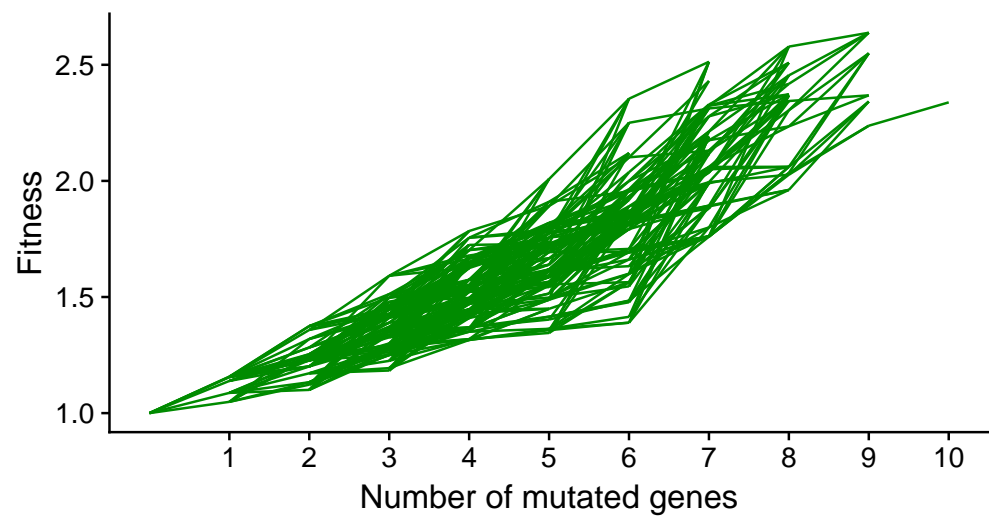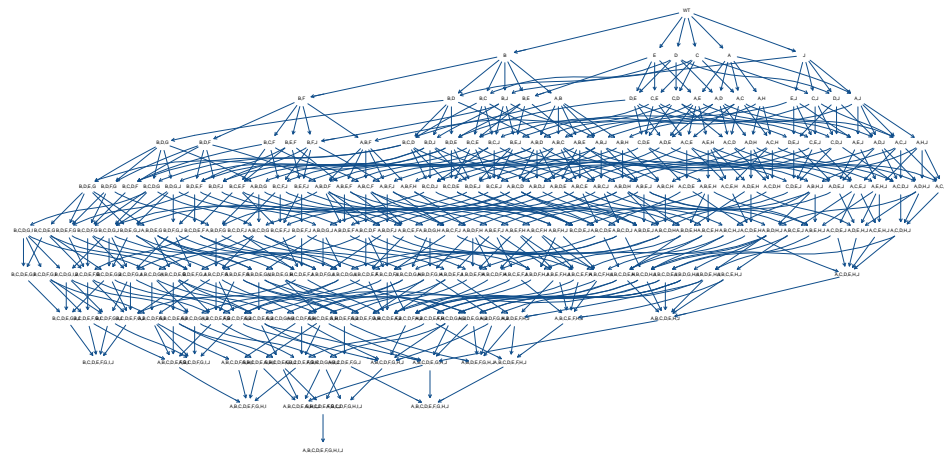

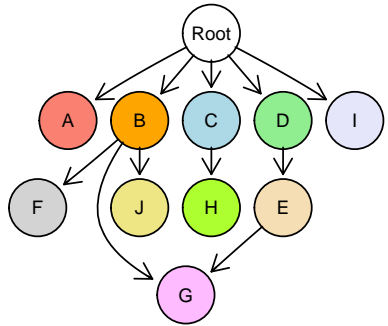

*ID* EJVLCdkFsVSwbukT  
*acc genotypes* 228  
*peaks no back* 18  
*removed edges* 157  
*prop rem edges* 0.202

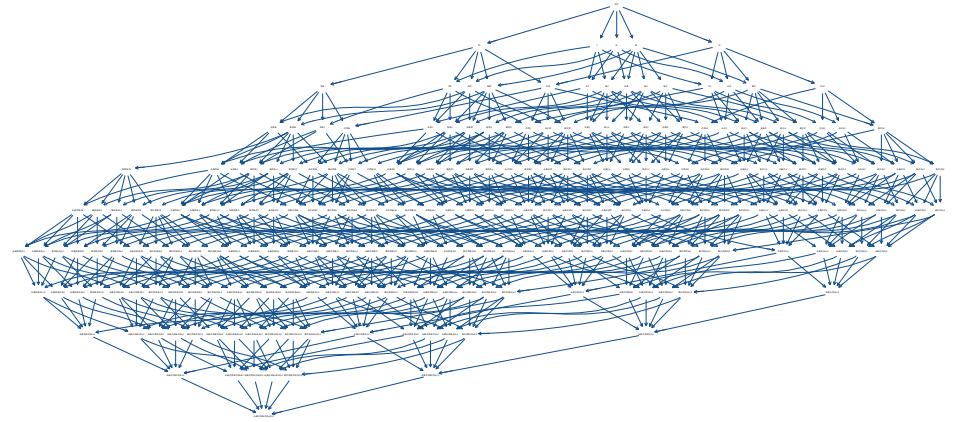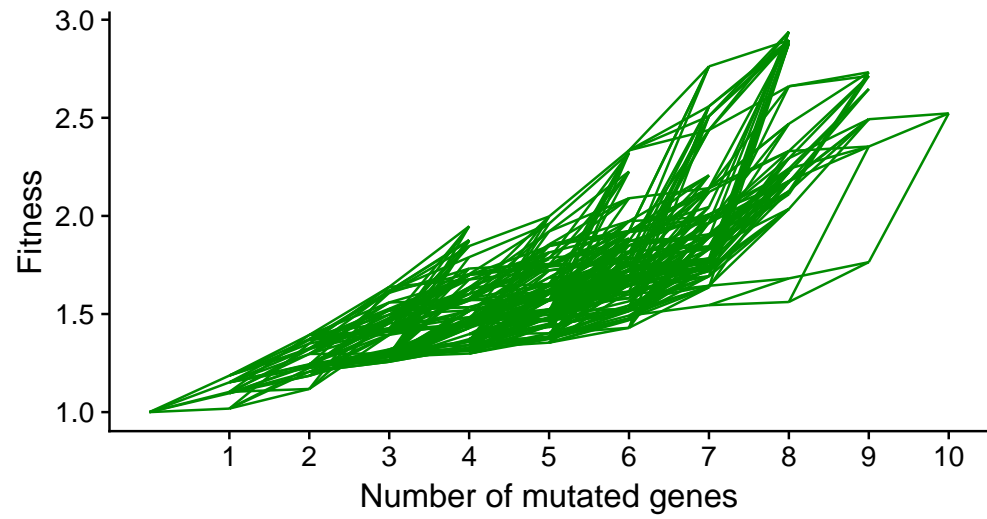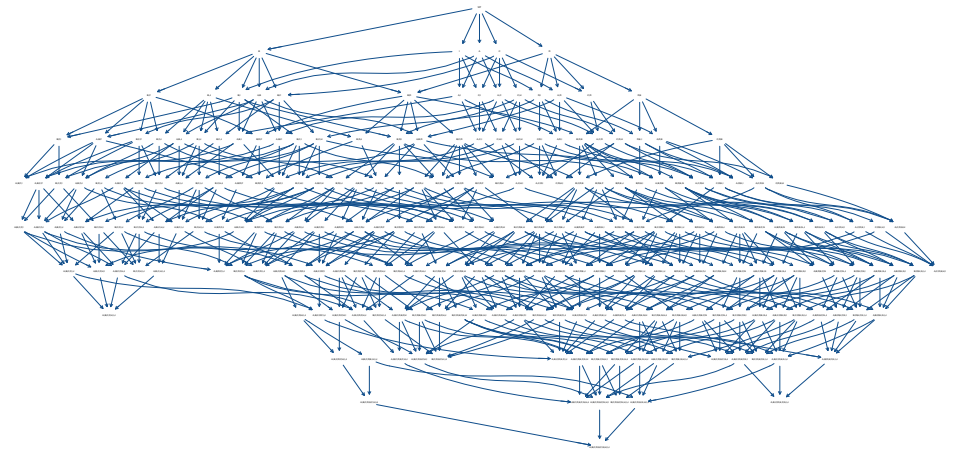

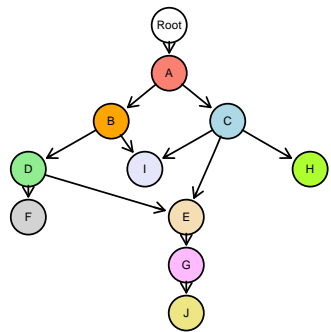

ID **EkGrTn9N4iF6FhE**  
 acc genotypes **43**  
 peaks no back **5**  
 removed edges **15**  
 prop rem edges **0.165**

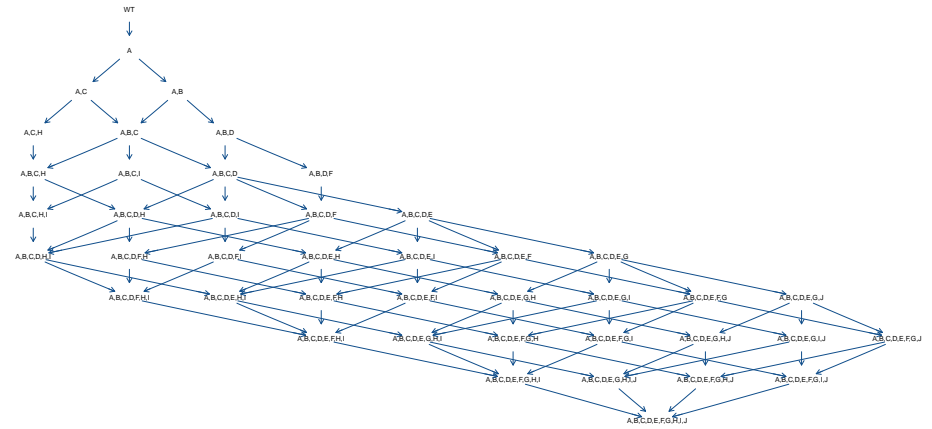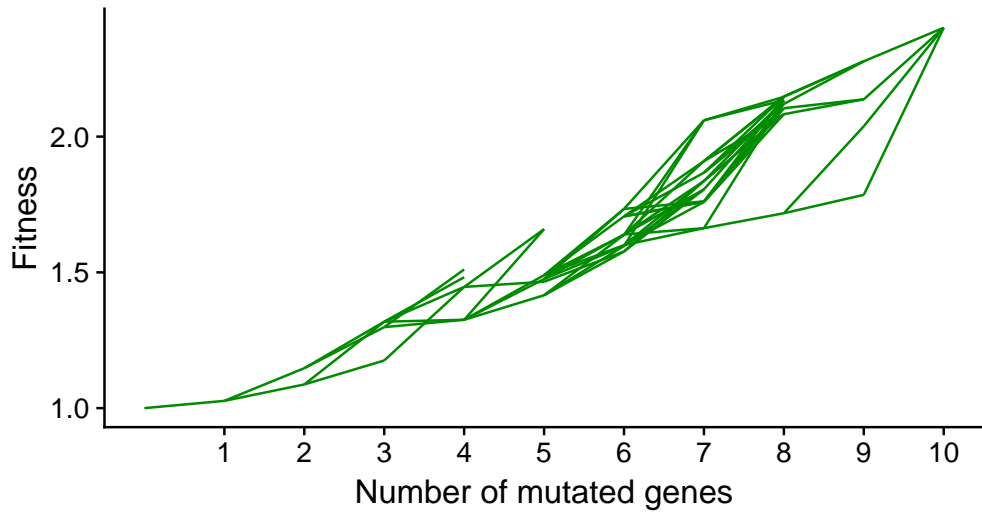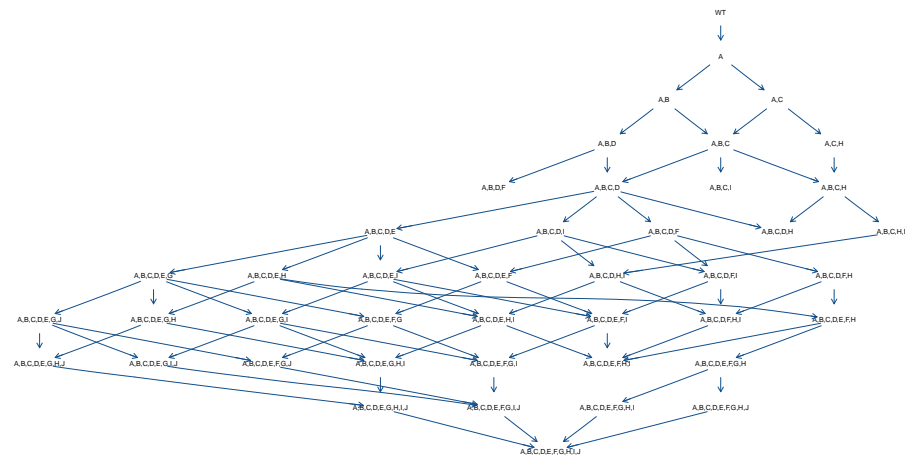

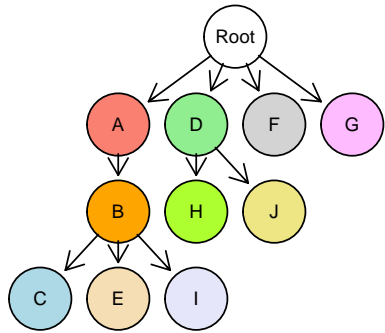

ID **EMu88ff7108oDY2Nd**  
 acc genotypes **200**  
 peaks no back **21**  
 removed edges **136**  
 prop rem edges **0.2**

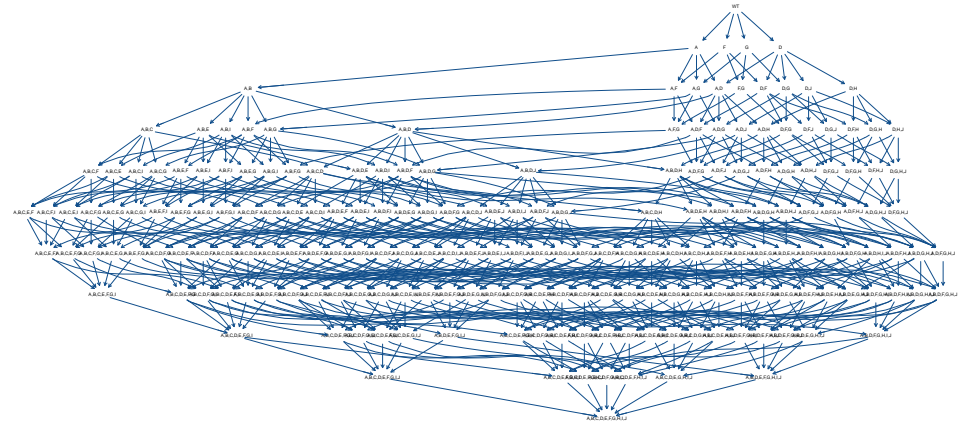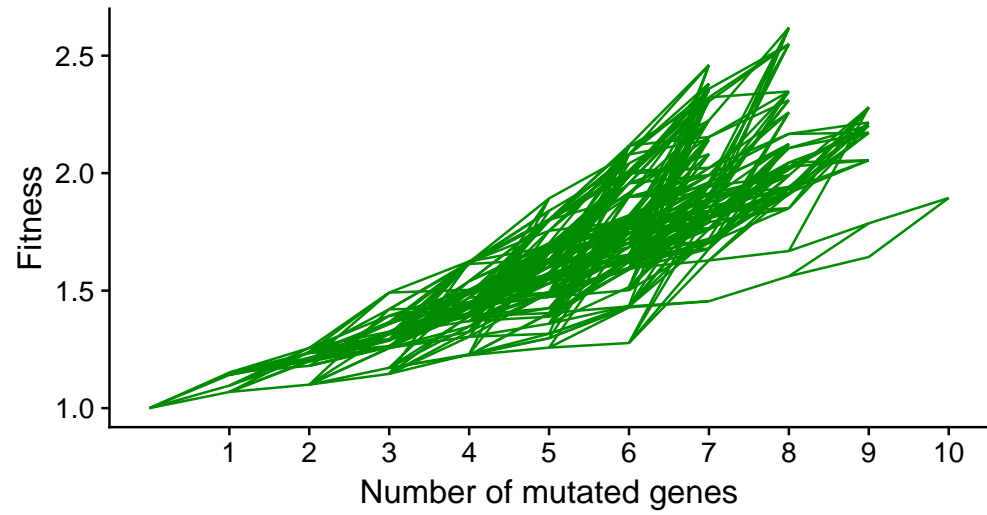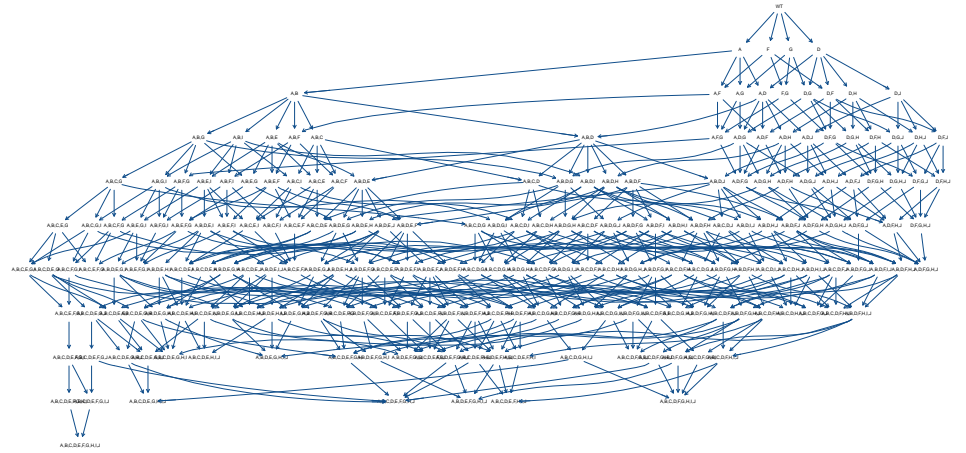

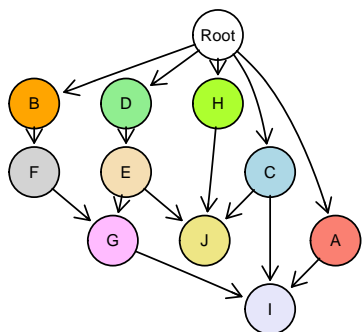

ID **EnDJ6doxjCtQ9zue**  
 acc genotypes **91**  
 peaks no back **11**  
 removed edges **52**  
 prop rem edges **0.211**

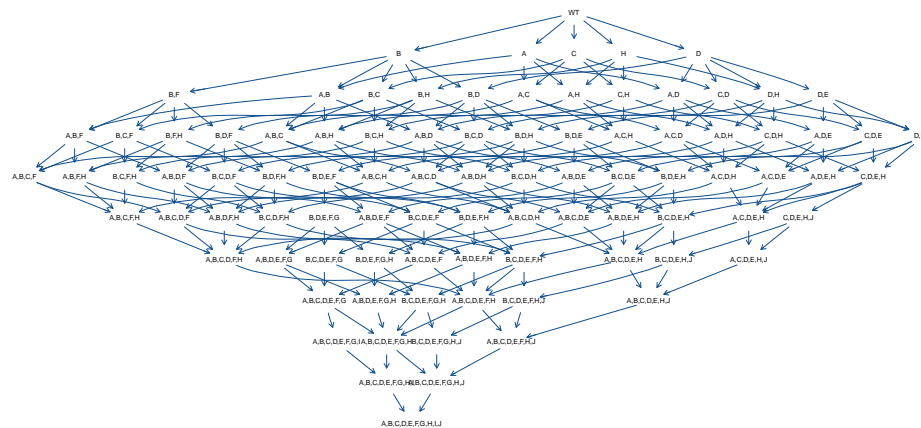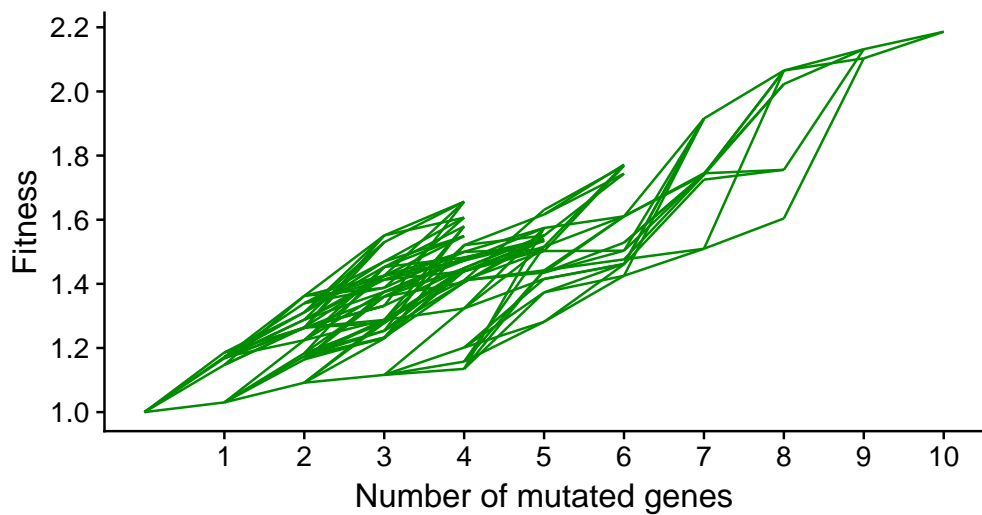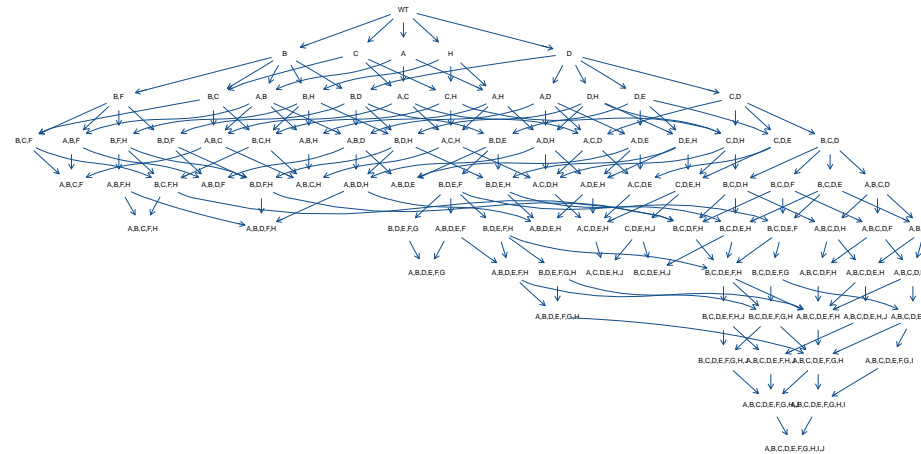

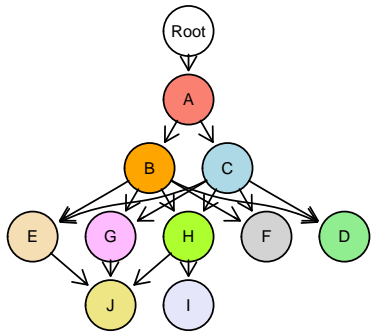

ID EPFit9RotYTgEnMR  
 acc genotypes 60  
 peaks no back 7  
 removed edges 30  
 prop rem edges 0.196

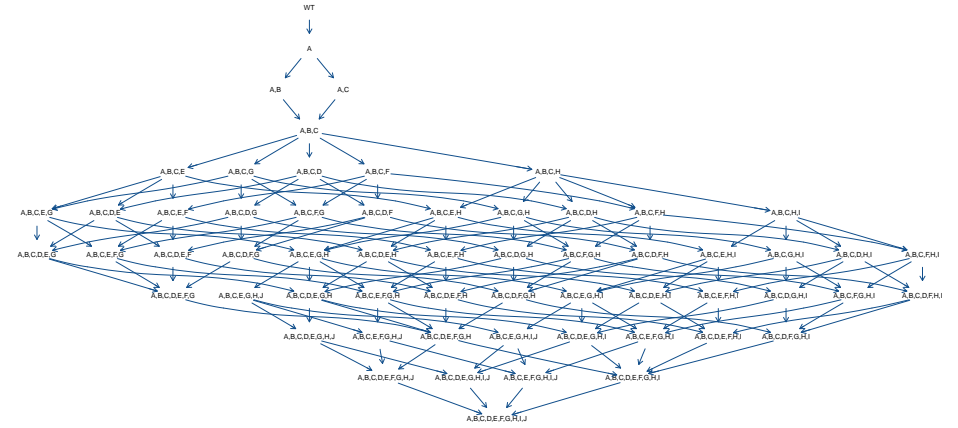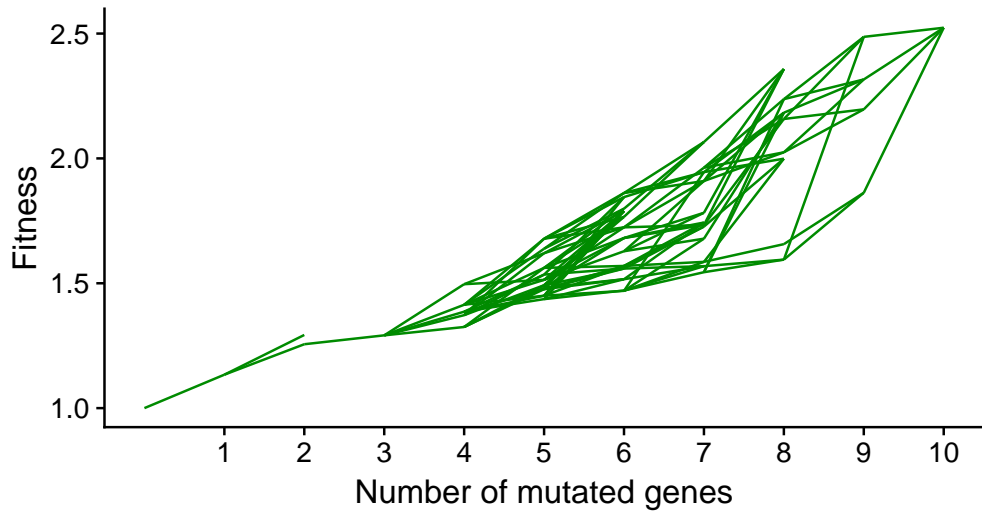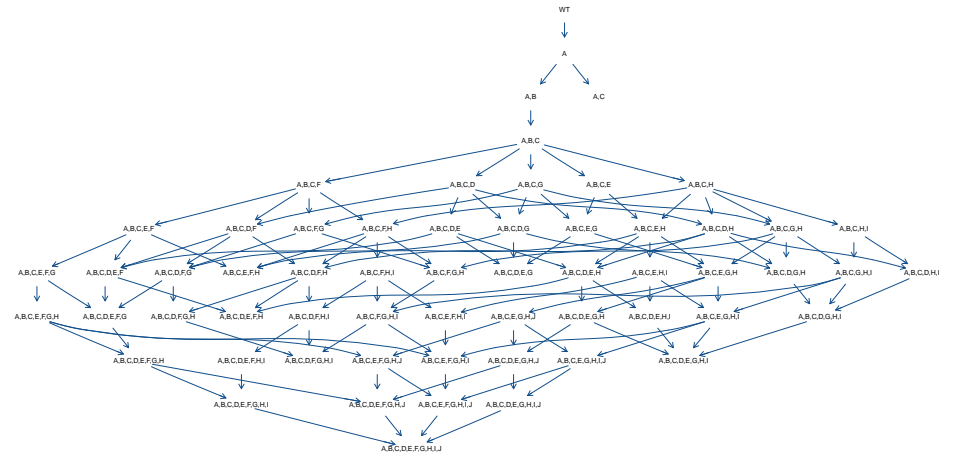

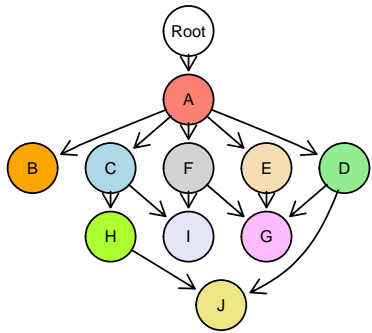

ID **FcFcGhQtL910uSnWI**  
 acc genotypes **91**  
 peaks no back **10**  
 removed edges **51**  
 prop rem edges **0.207**

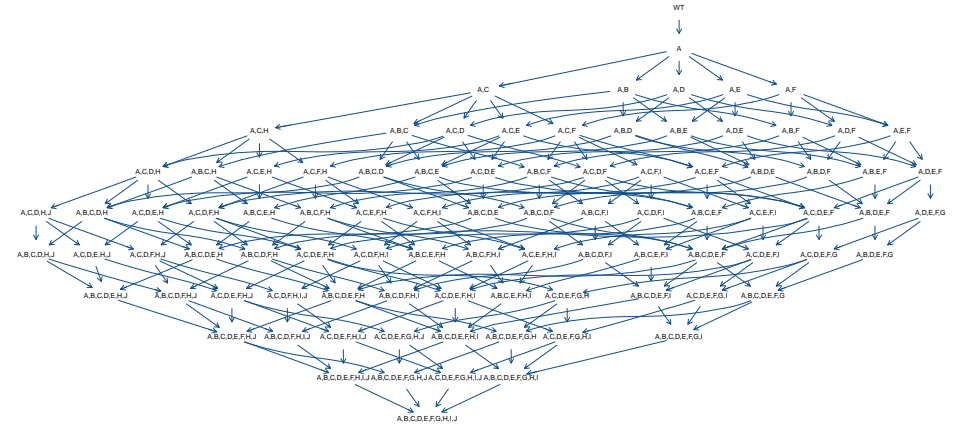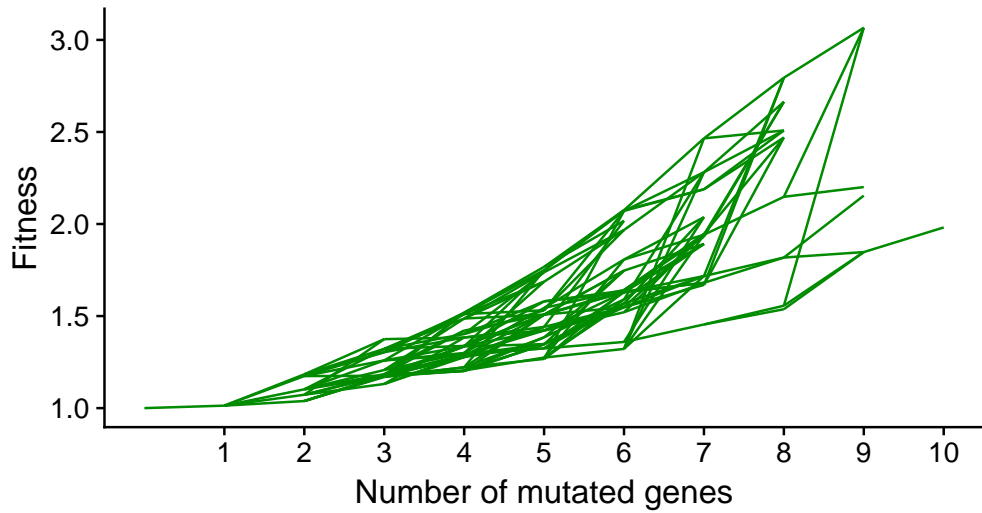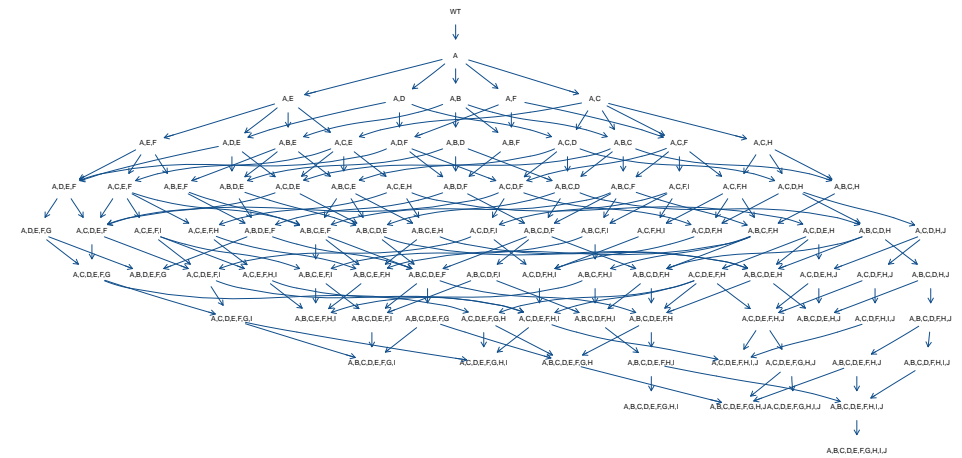



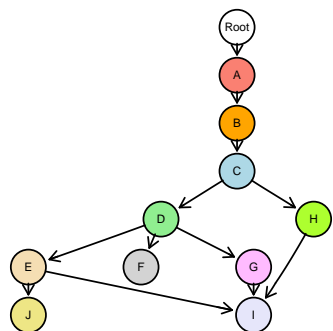

ID fci5UMNFVGxtbOWb  
 acc genotypes 33  
 peaks no back 2  
 removed edges 4  
 prop rem edges 0.061

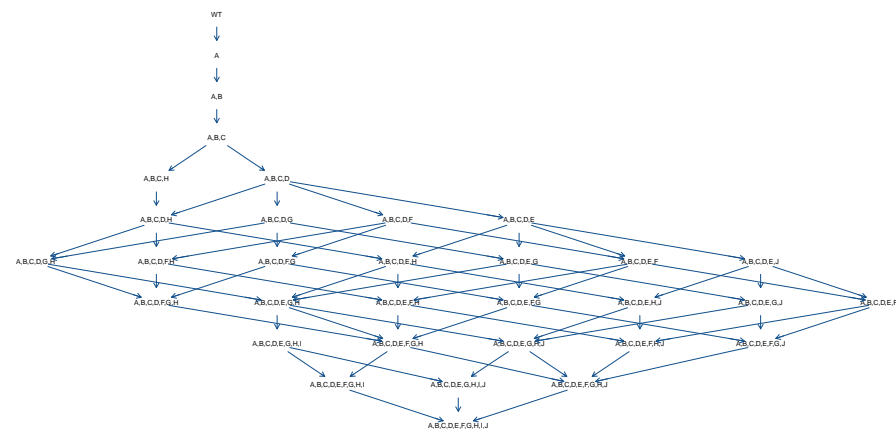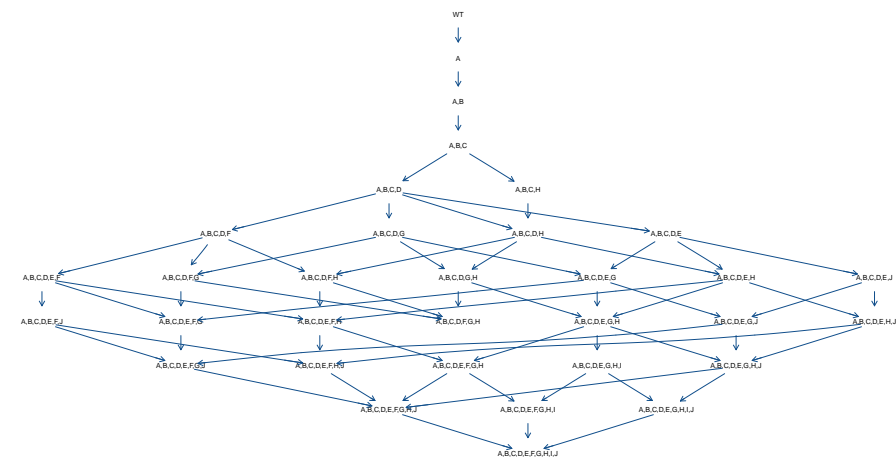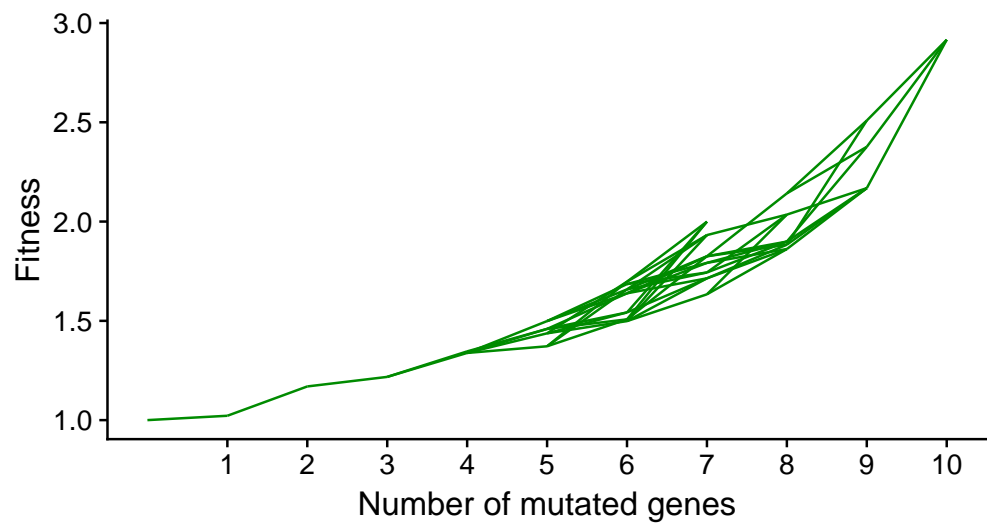

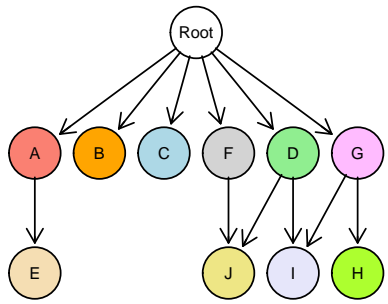

ID fjY15Fajf119TqE  
 acc genotypes 252  
 peaks no back 17  
 removed edges 166  
 prop rem edges 0.189

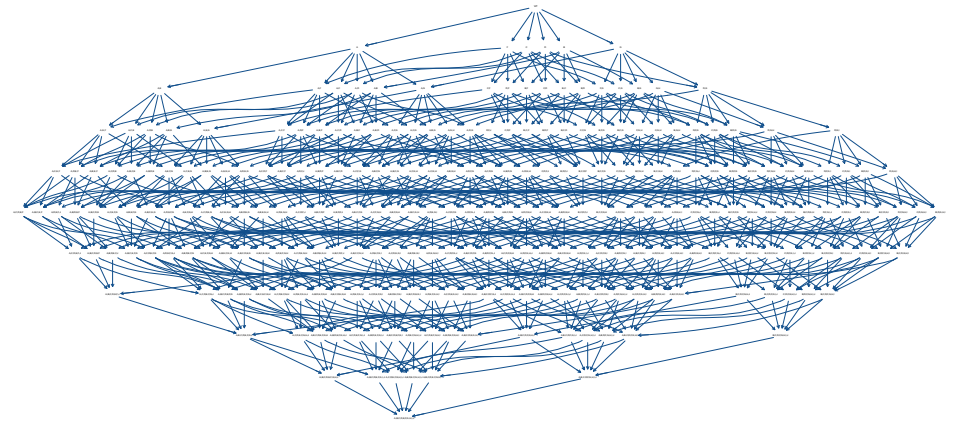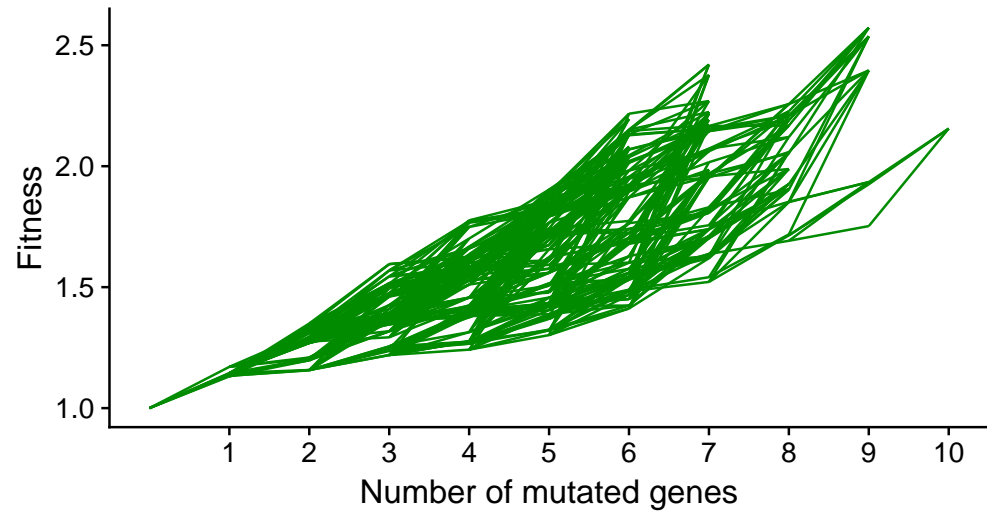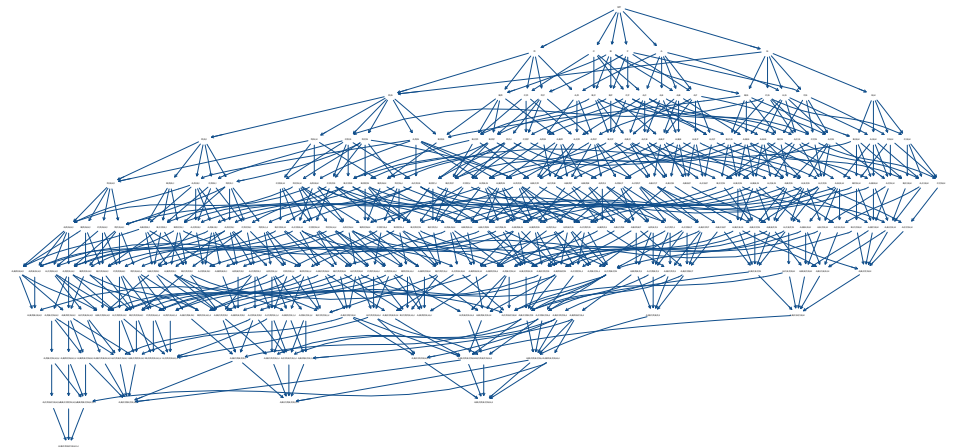

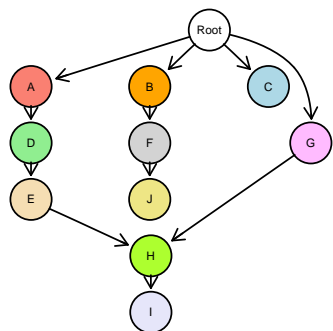

ID **FNDb716ELrbzr3xJ**  
 acc genotypes **80**  
 peaks no back **3**  
 removed edges **22**  
 prop rem edges **0.112**

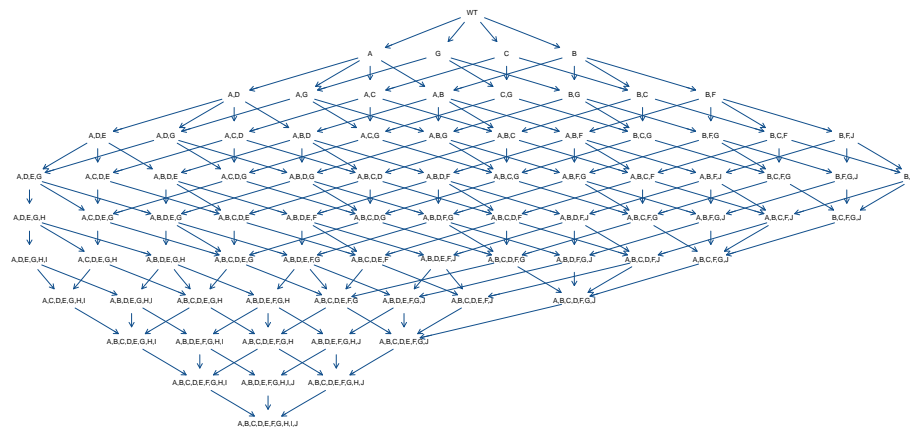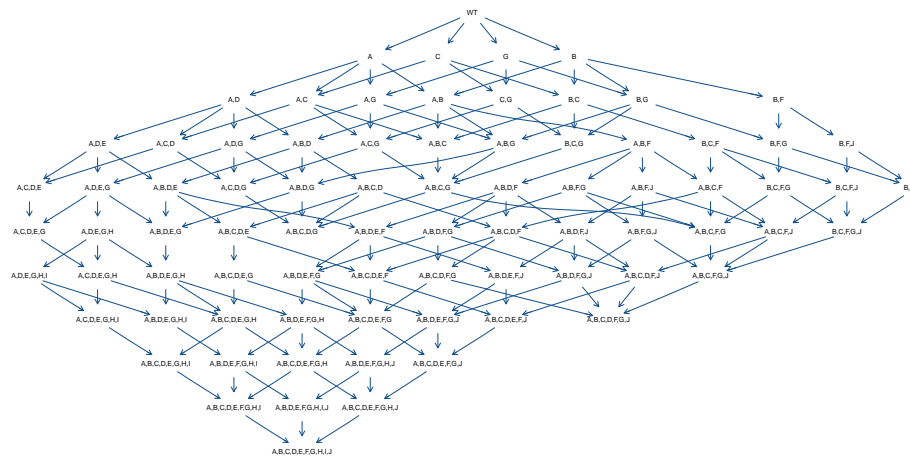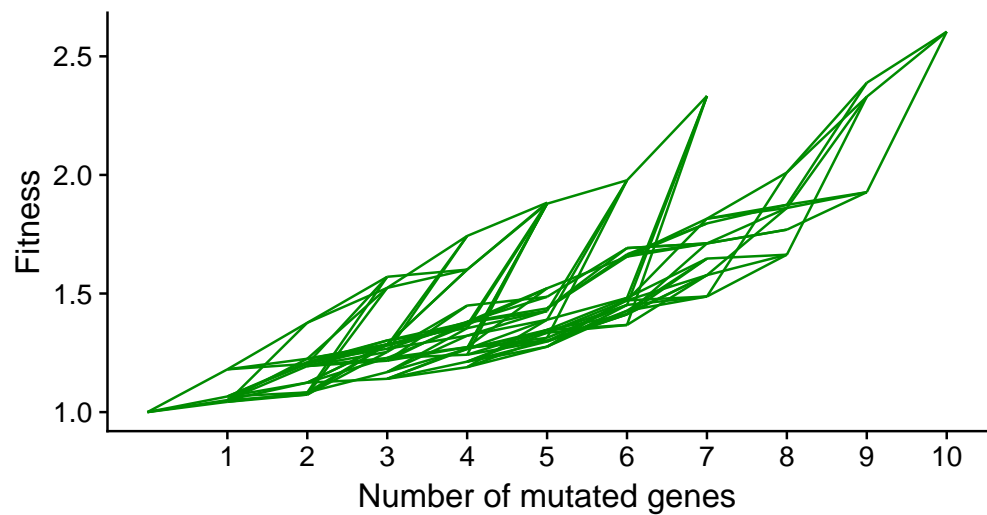

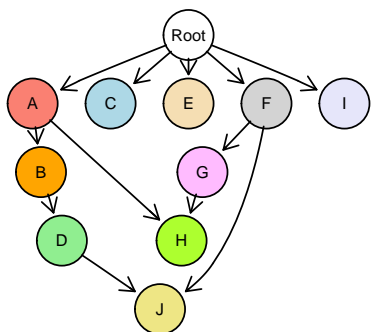

ID **Fp1fshyDCkcvIW97**  
 acc genotypes **144**  
 peaks no back 13  
 removed edges 95  
 prop rem edges 0.22

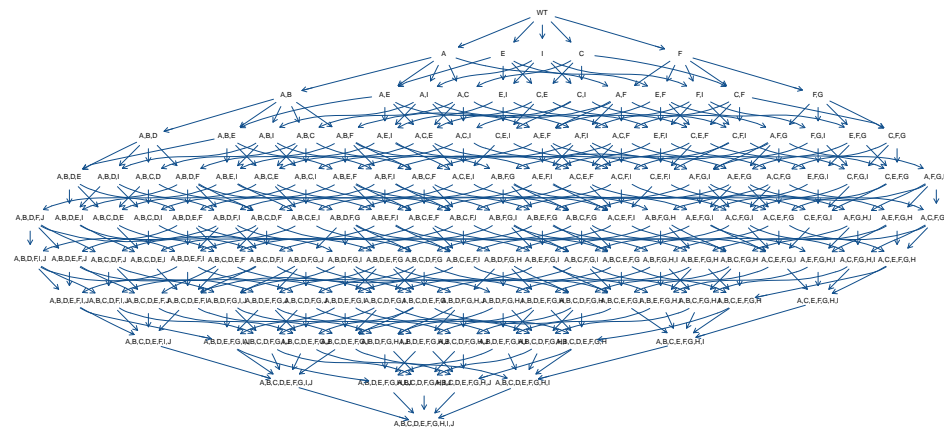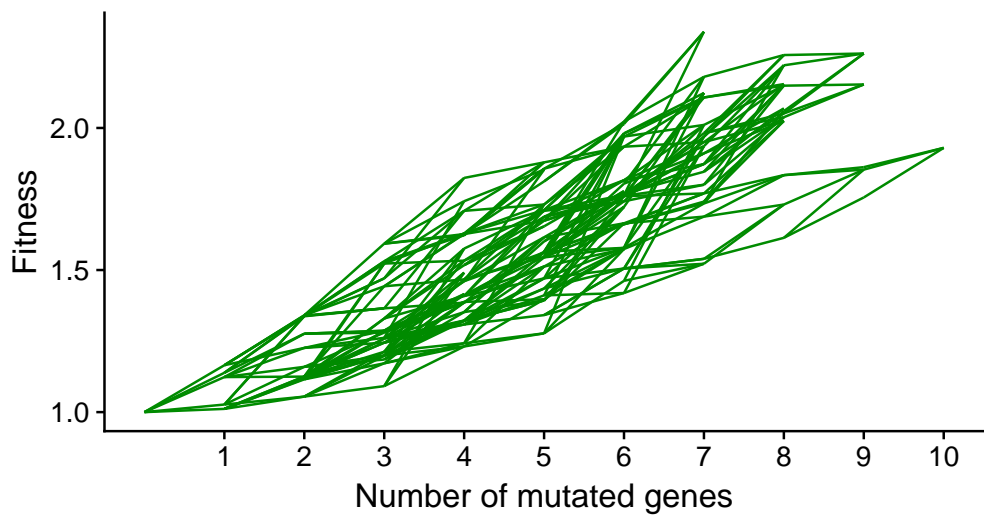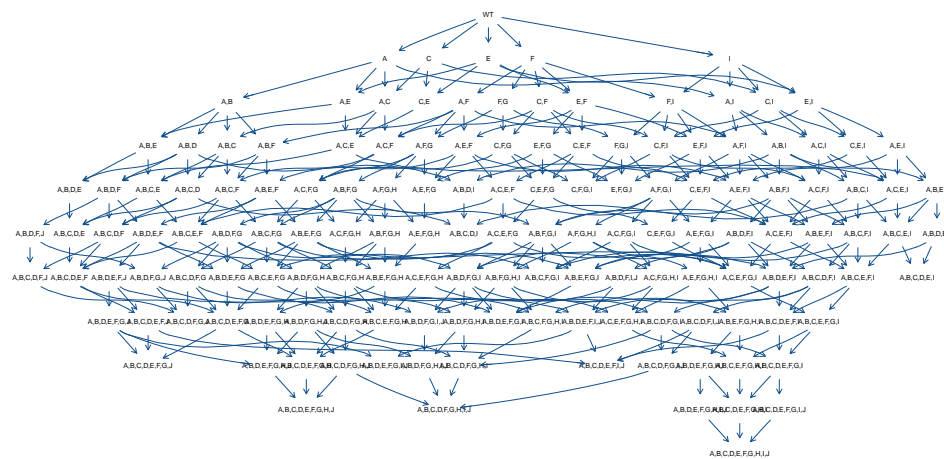

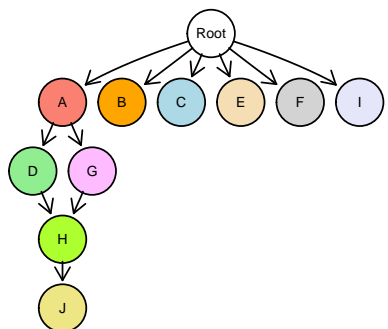

ID [ftHhRYTFn79eRdaP](#)  
 acc genotypes 224  
 peaks no back 19  
 removed edges 143  
 prop rem edges 0.182

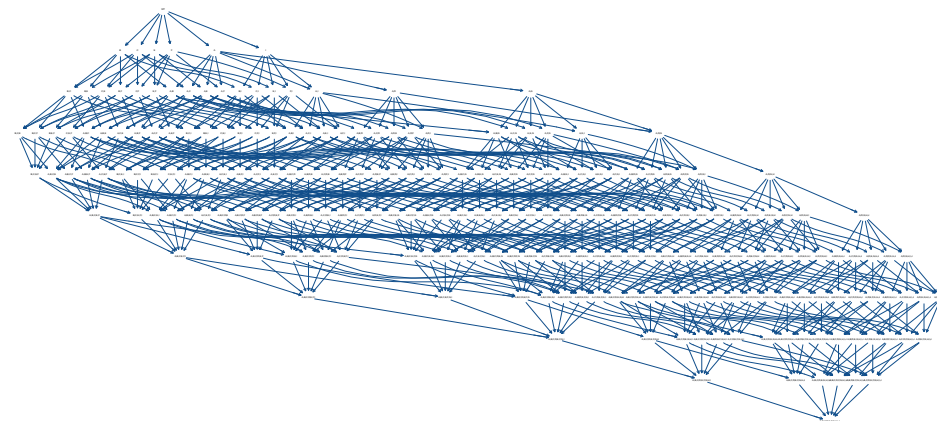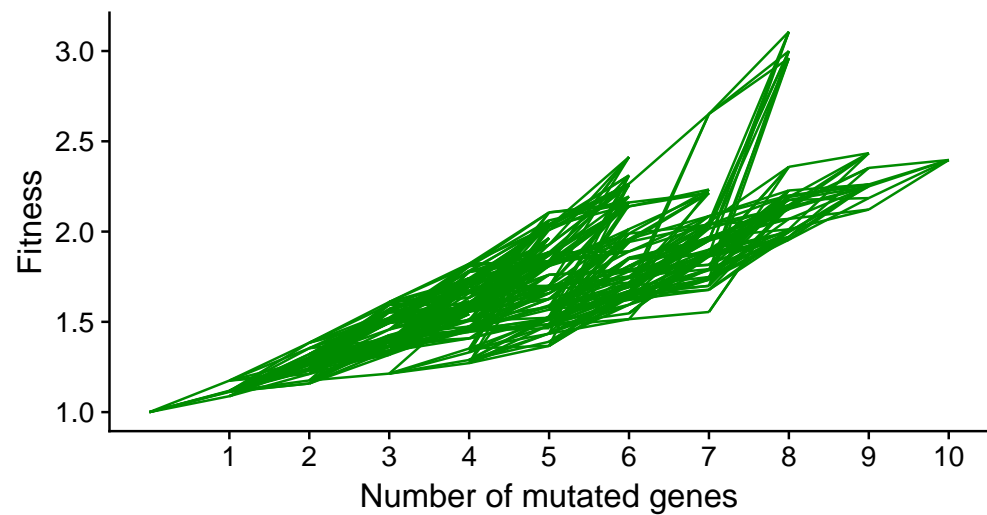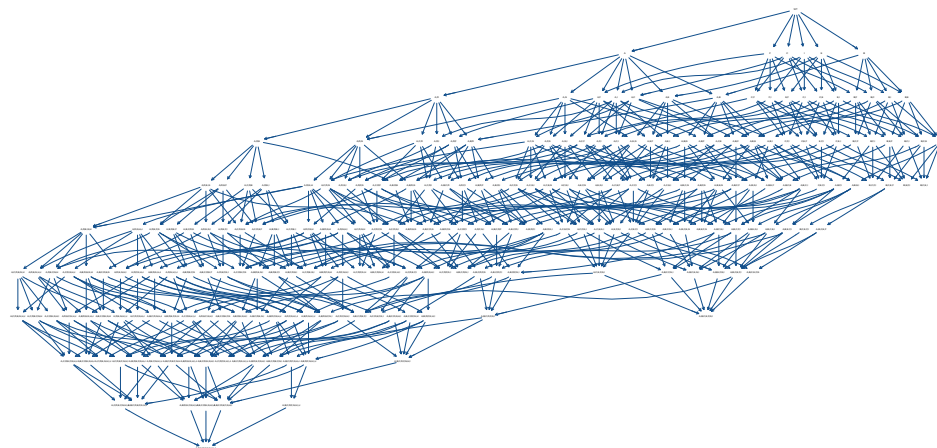

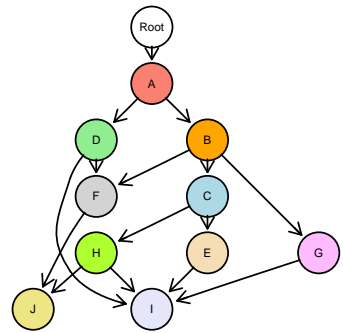

ID **fV68aMwNjCqHIZQX**  
 acc genotypes **40**  
 peaks no back **3**  
 removed edges **11**  
 prop rem edges **0.134**

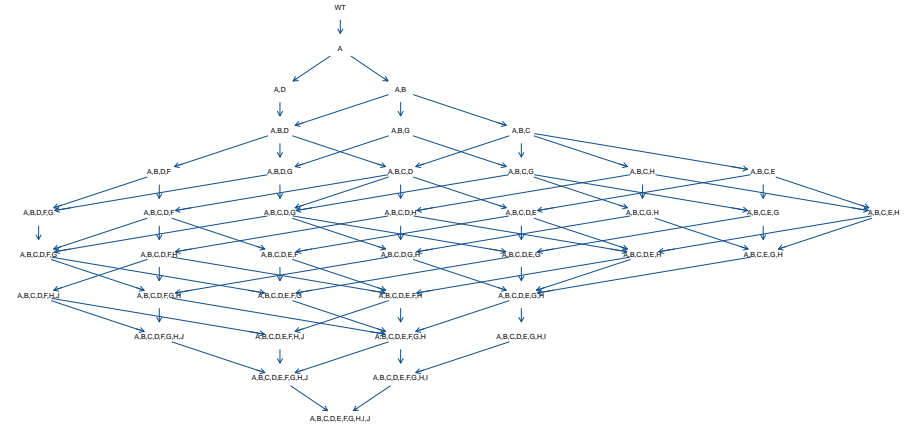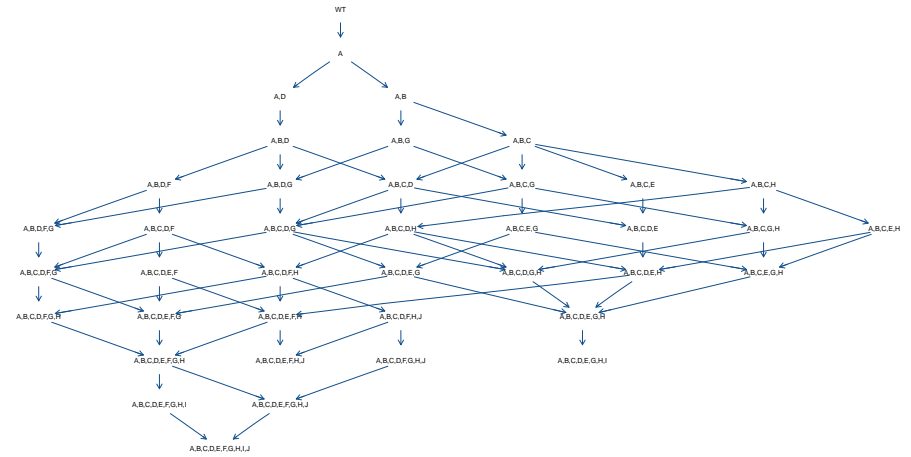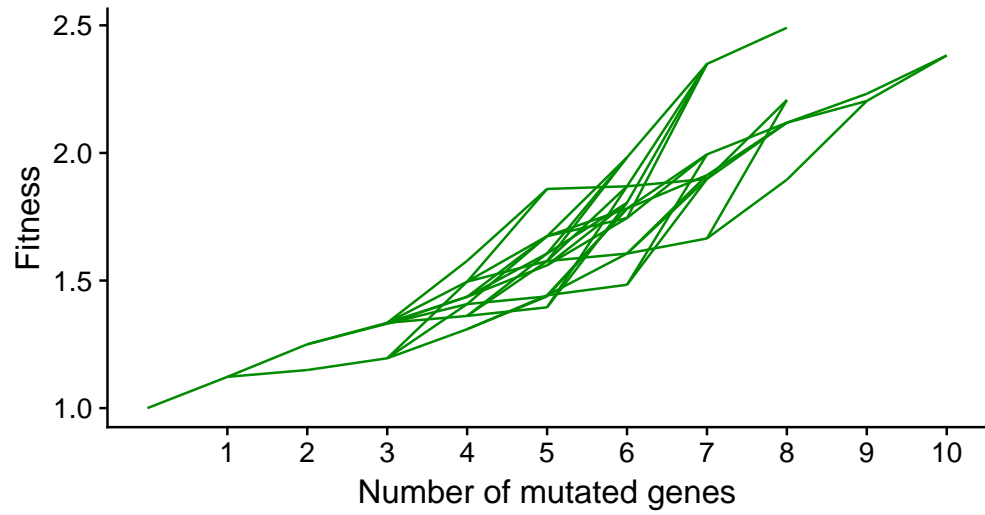

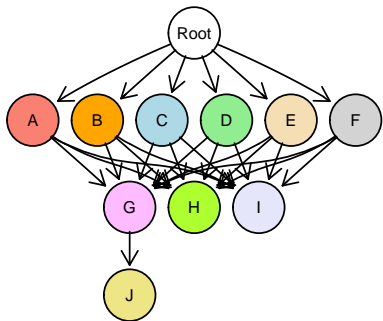

ID [g632uhVWzFmg59eK](#)  
 acc genotypes 75  
 peaks no back 10  
 removed edges 31  
 prop rem edges 0.146

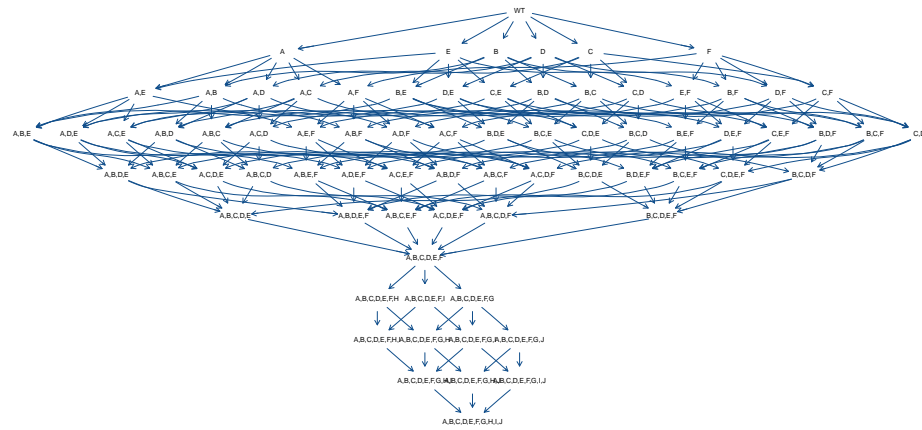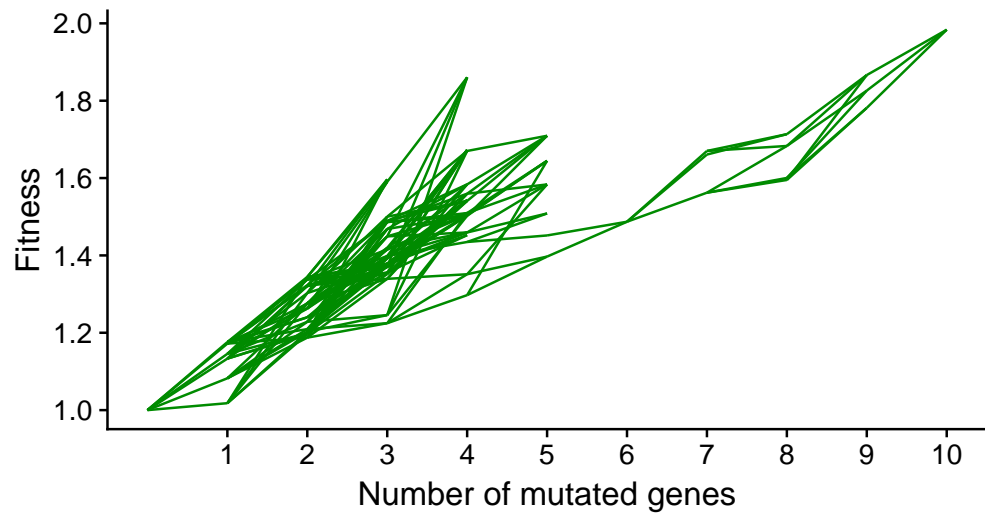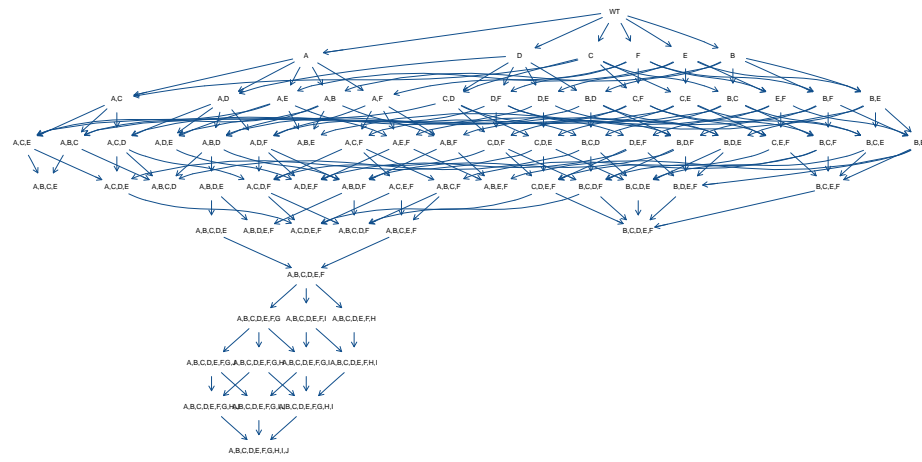

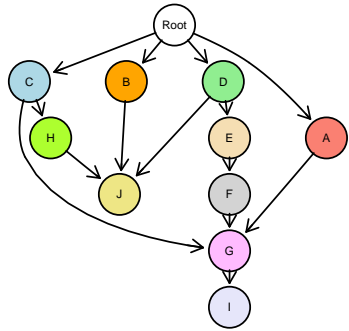

ID **G9yrl22aEcqd1Y23**  
 acc genotypes **64**  
 peaks no back **8**  
 removed edges **28**  
 prop rem edges **0.188**

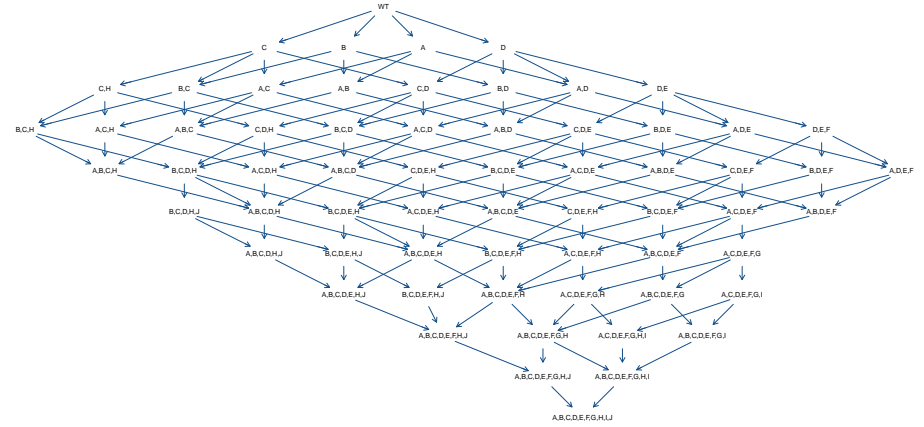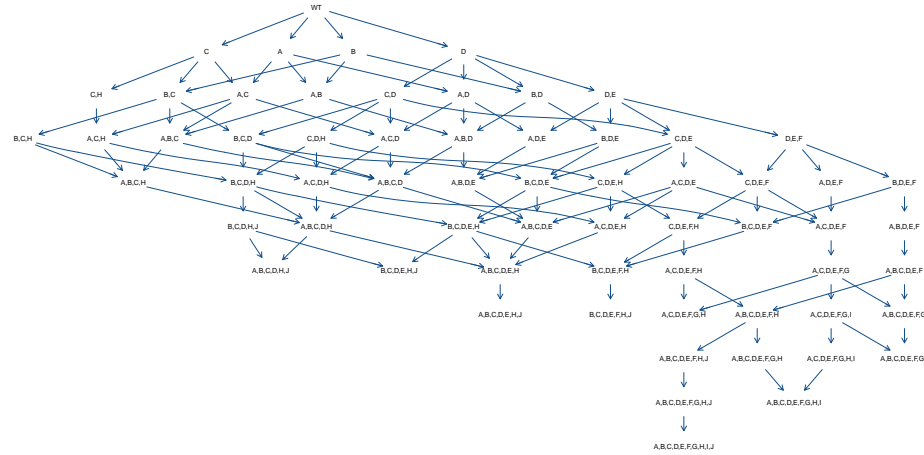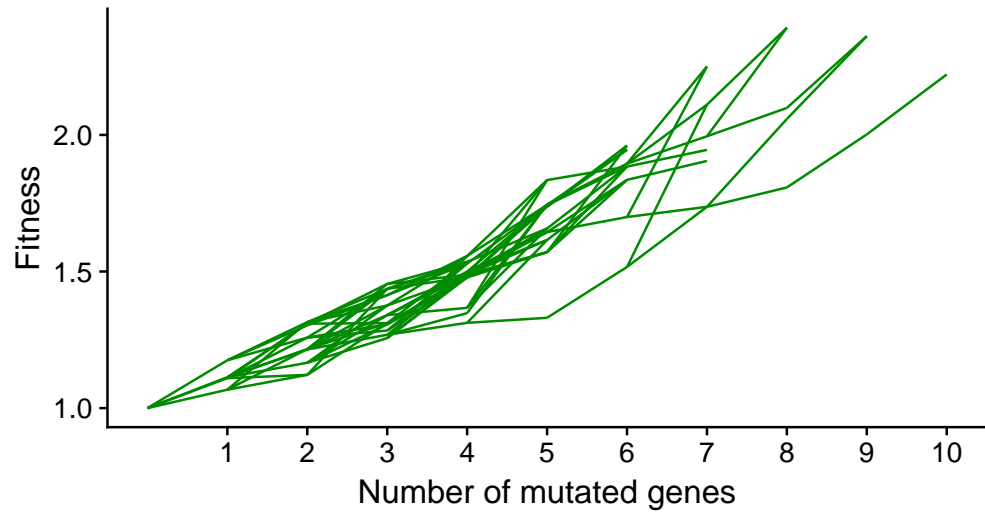



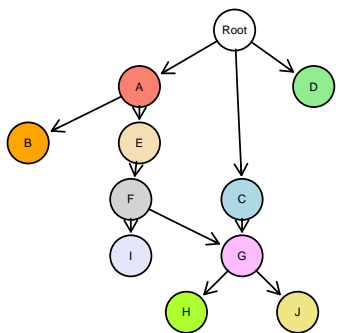

ID [gA76bffYxtXYMJa2](#)  
 acc genotypes 68  
 peaks no back 11  
 removed edges 30  
 prop rem edges 0.179

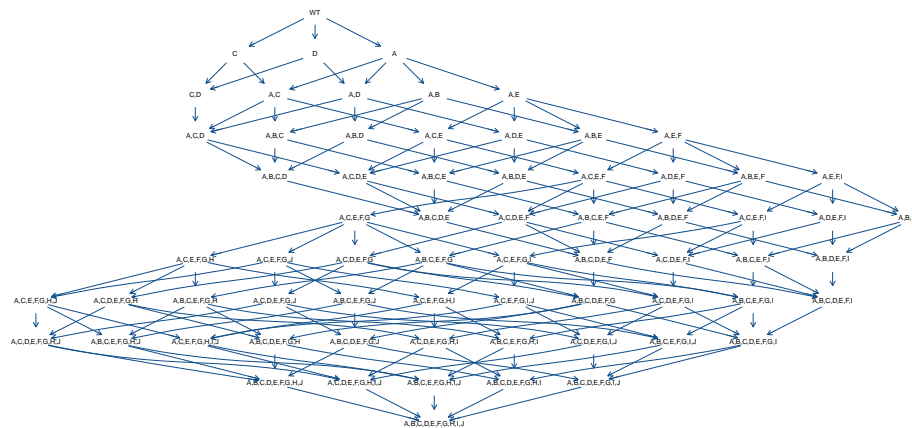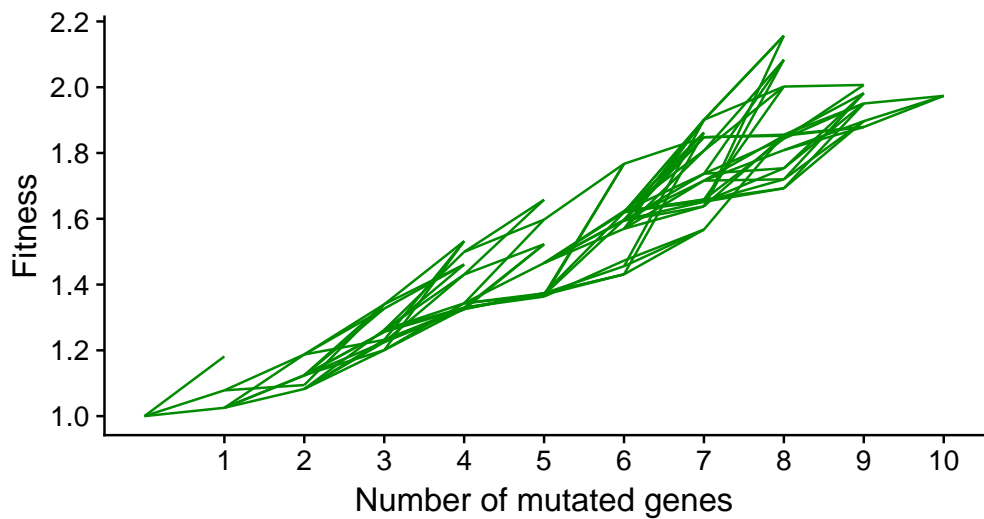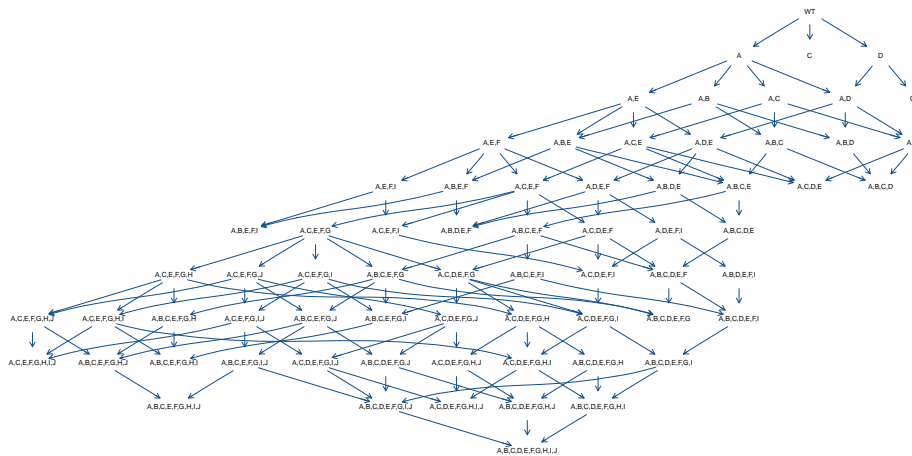

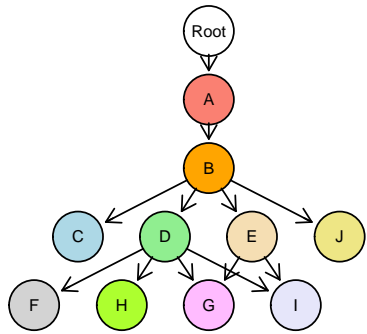

ID **GeE6ZiWGbvglEf7V**  
 acc genotypes **90**  
 peaks no back **11**  
 removed edges **56**  
 prop rem edges **0.214**

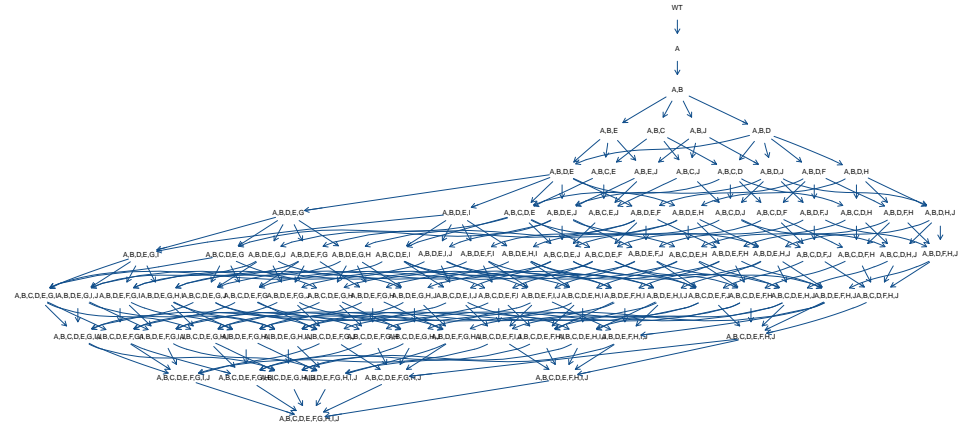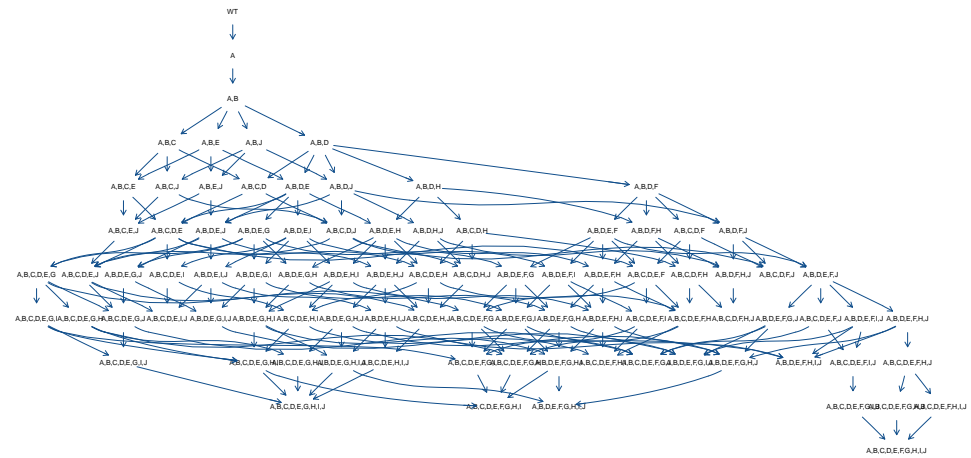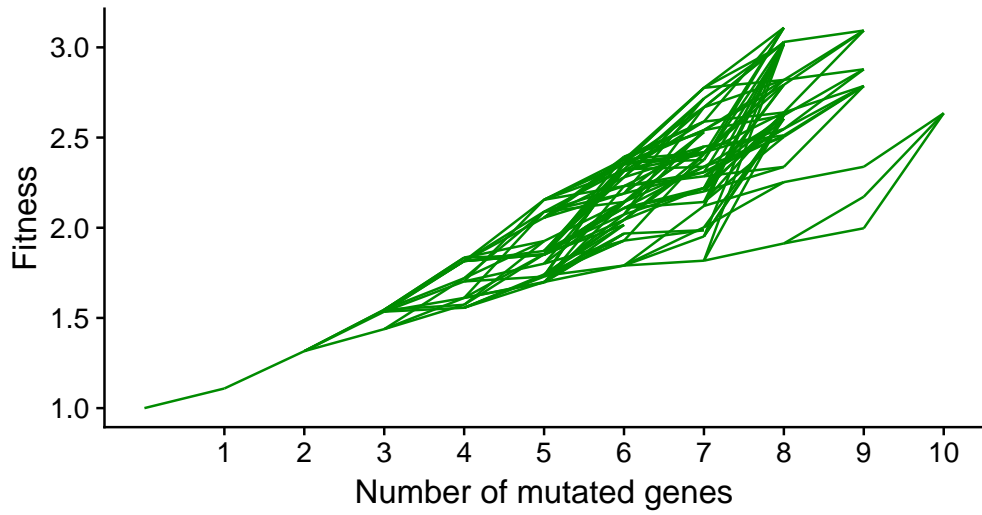

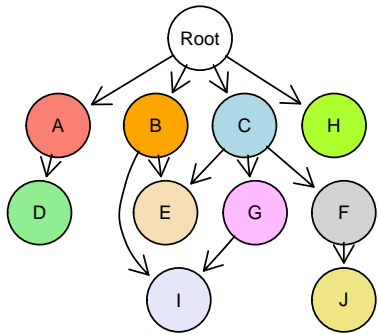

ID [giZLyxZUhrKmiuln](#)  
 acc genotypes 156  
 peaks no back 15  
 removed edges 101  
 prop rem edges 0.212

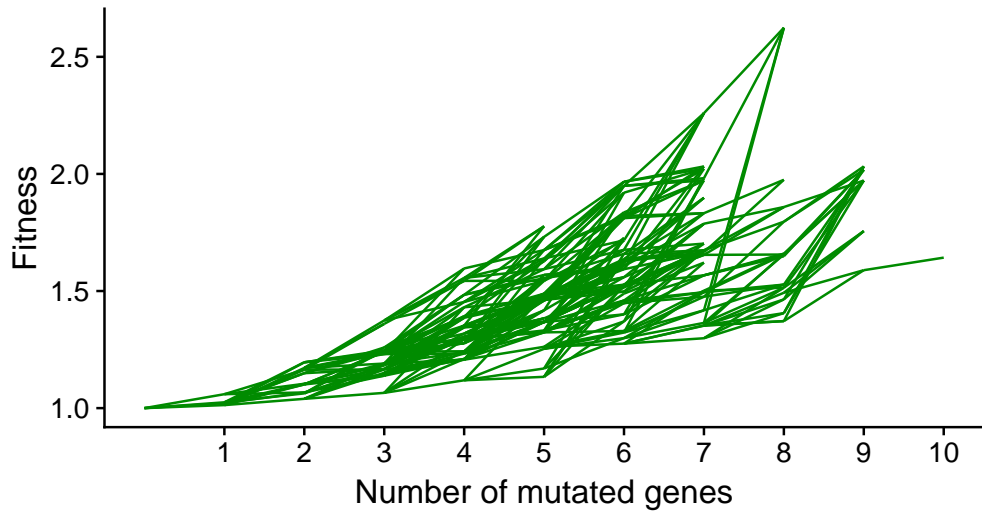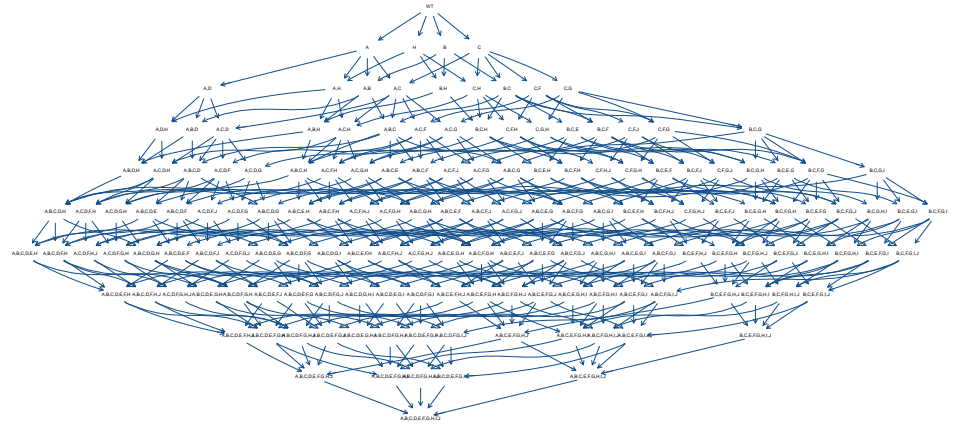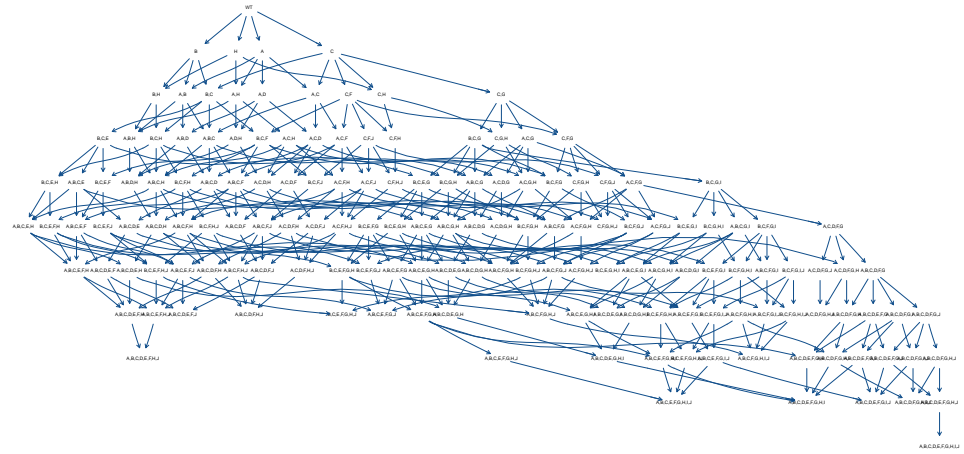

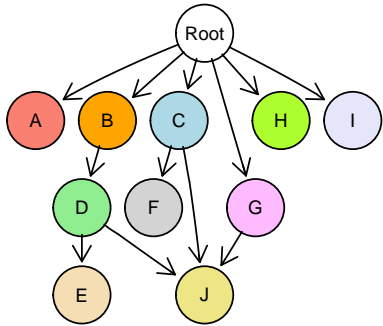

ID [glDXEi6qj95q3lss](#)  
 acc genotypes 224  
 peaks no back 18  
 removed edges 174  
 prop rem edges 0.227

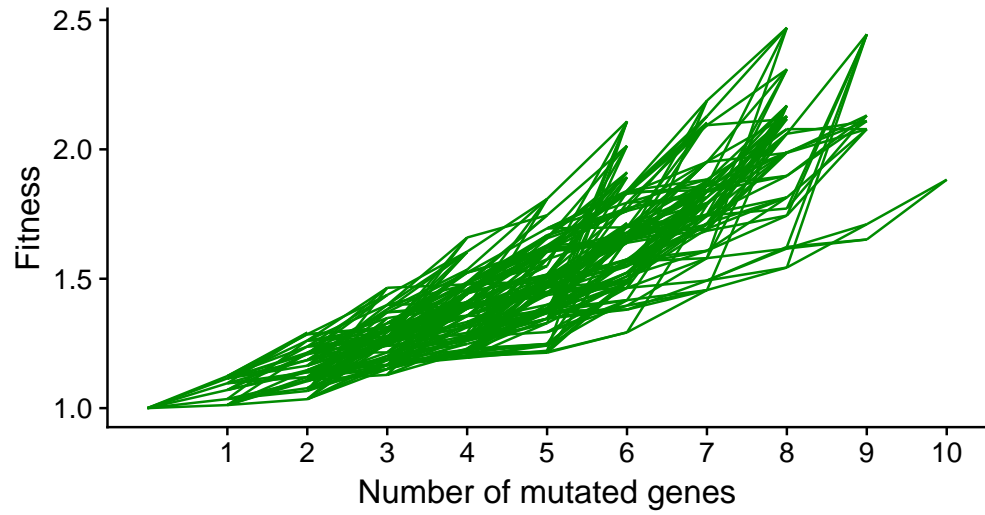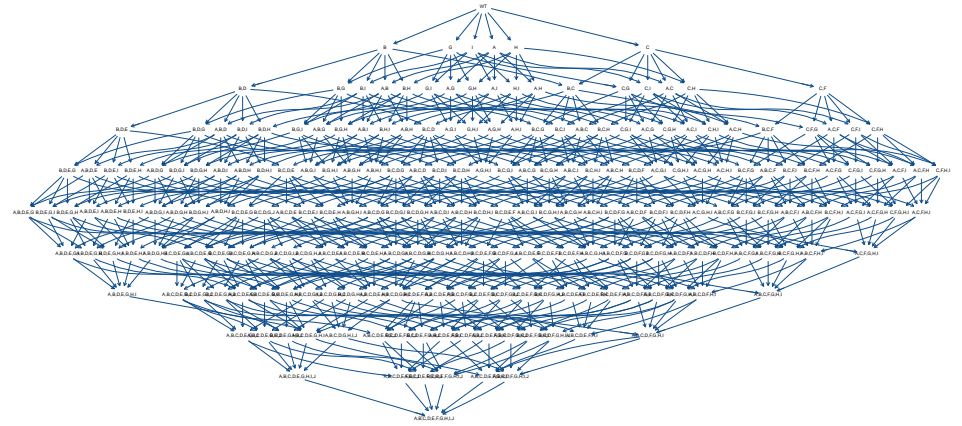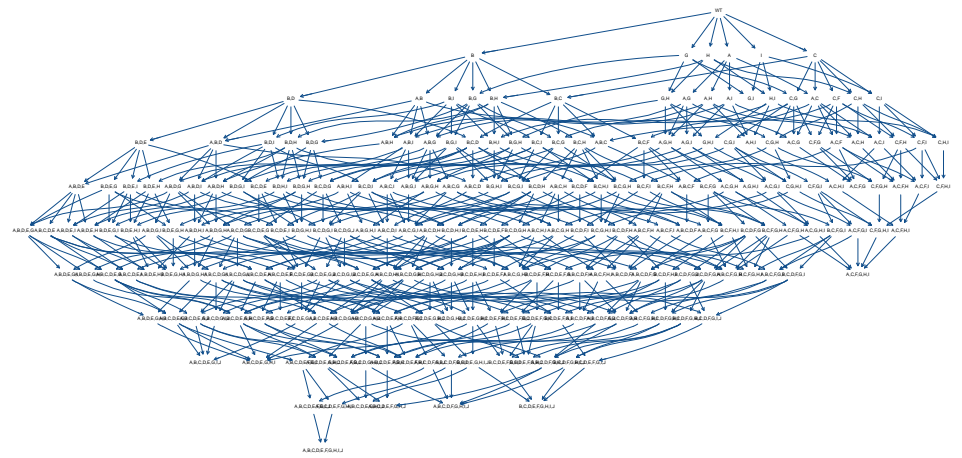

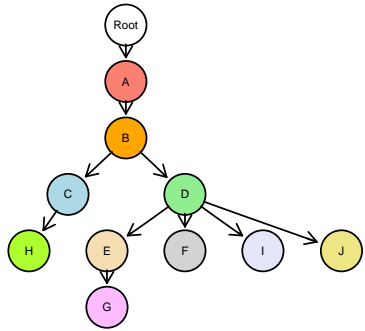

ID [gnxobzJ9TsWIPFr](#)  
 acc genotypes 77  
 peaks no back 9  
 removed edges 45  
 prop rem edges 0.213

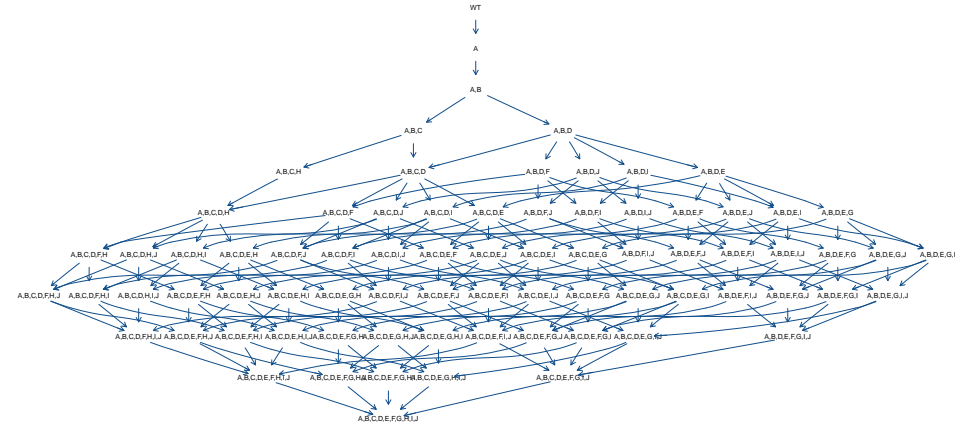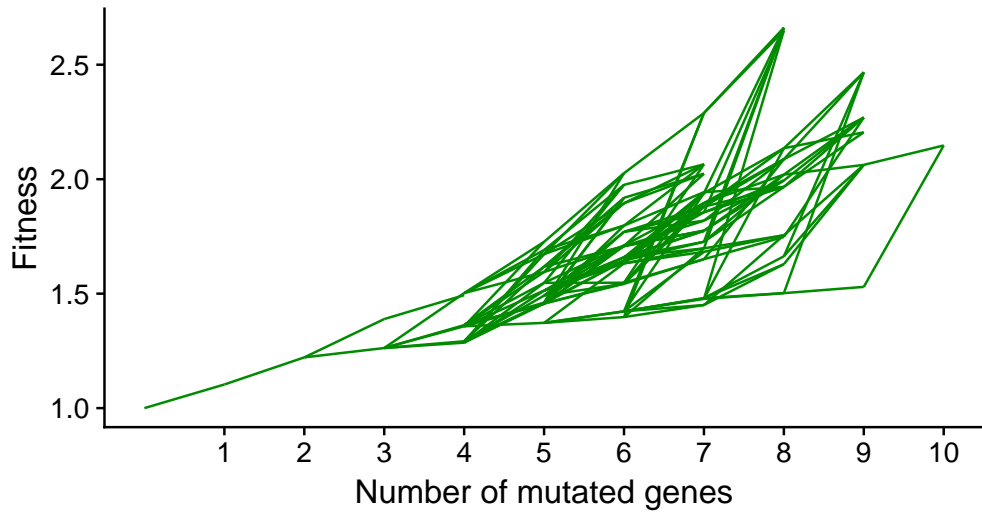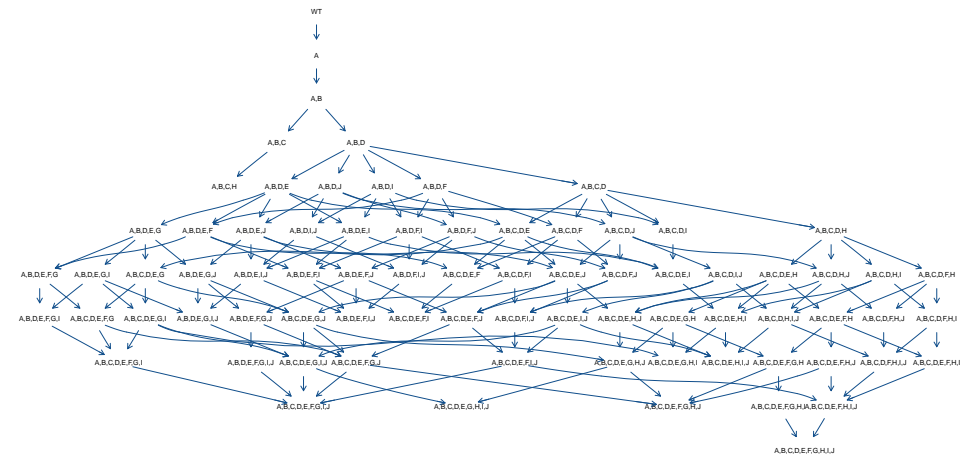

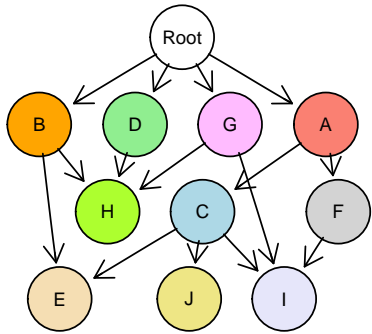

ID **Gw7Lw136jeS105BFu**  
 acc genotypes **99**  
 peaks no back **6**  
 removed edges **44**  
 prop rem edges **0.165**

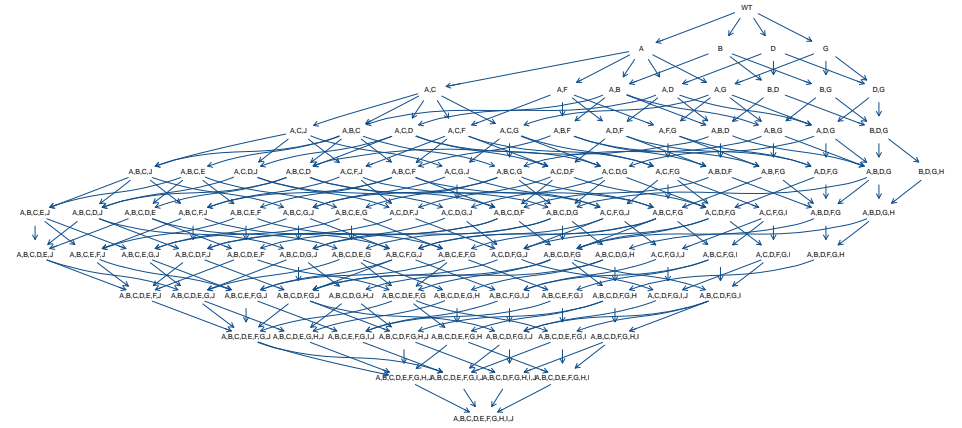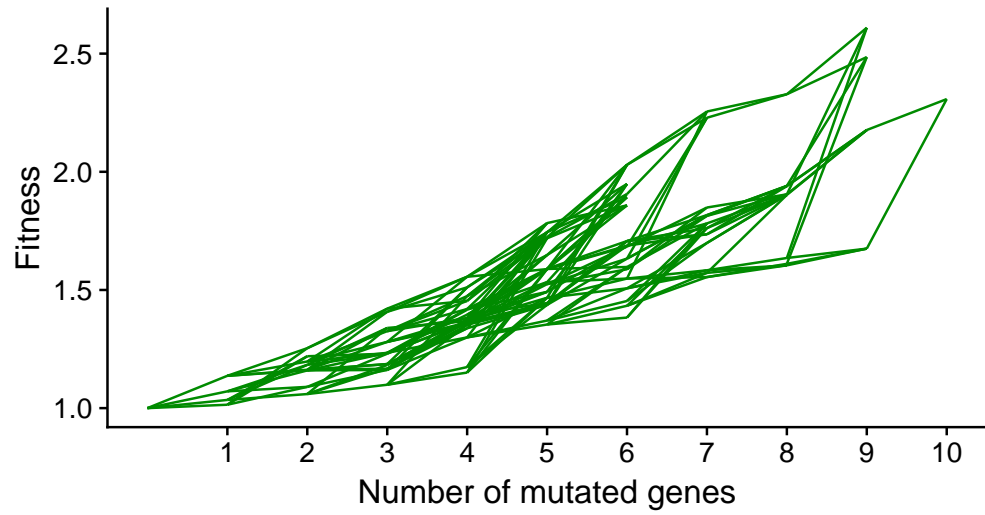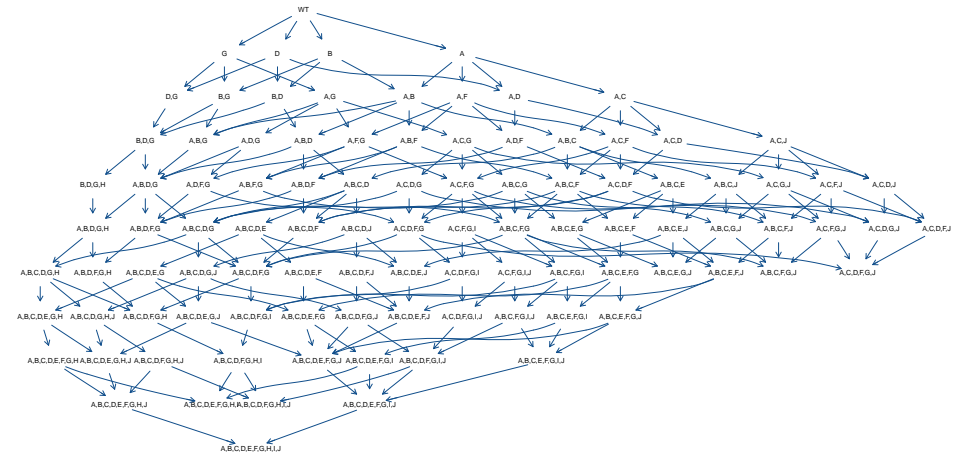

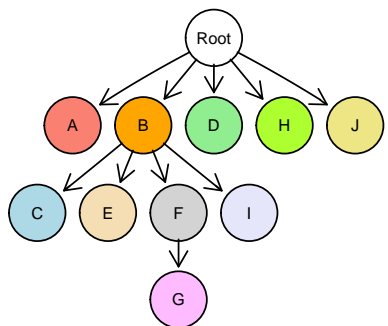

ID [hEMMzV7G9fteqwr](#)  
 acc genotypes 400  
 peaks no back 24  
 removed edges 307  
 prop rem edges 0.186

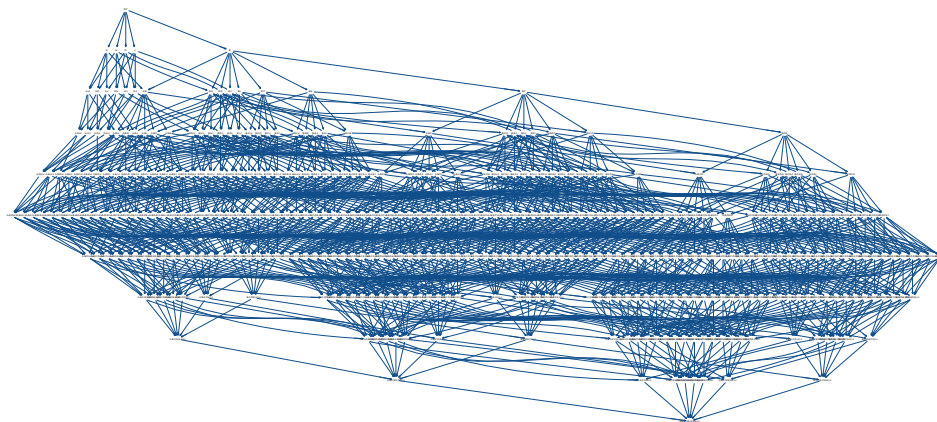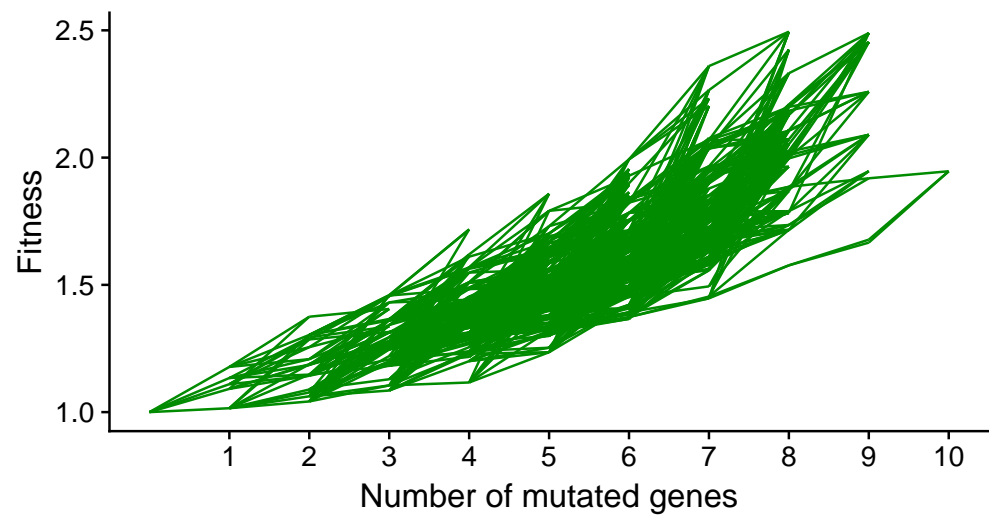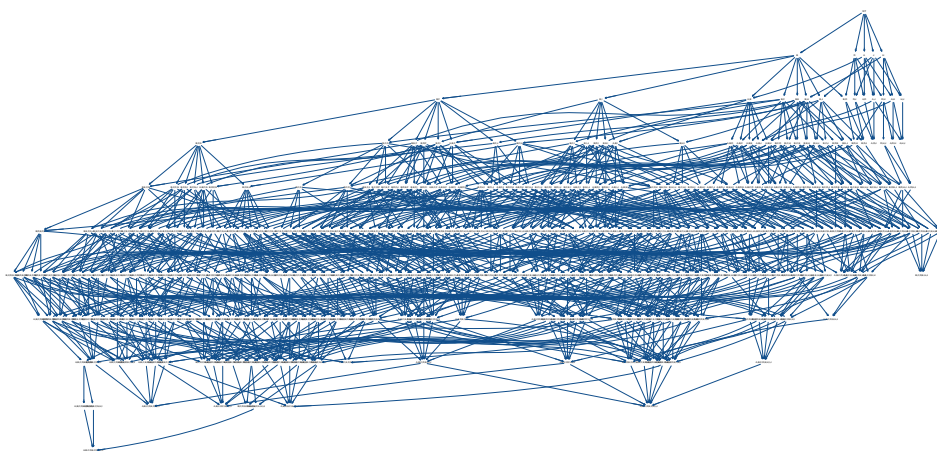

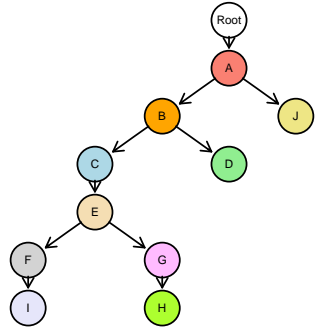

ID **HJf8BvCZrOXnhdpP**  
 acc genotypes **47**  
 peaks no back **5**  
 removed edges **21**  
 prop rem edges **0.202**

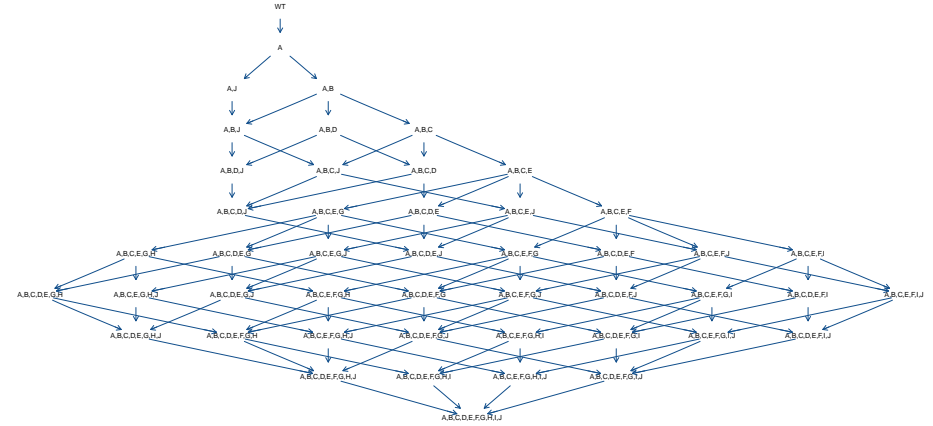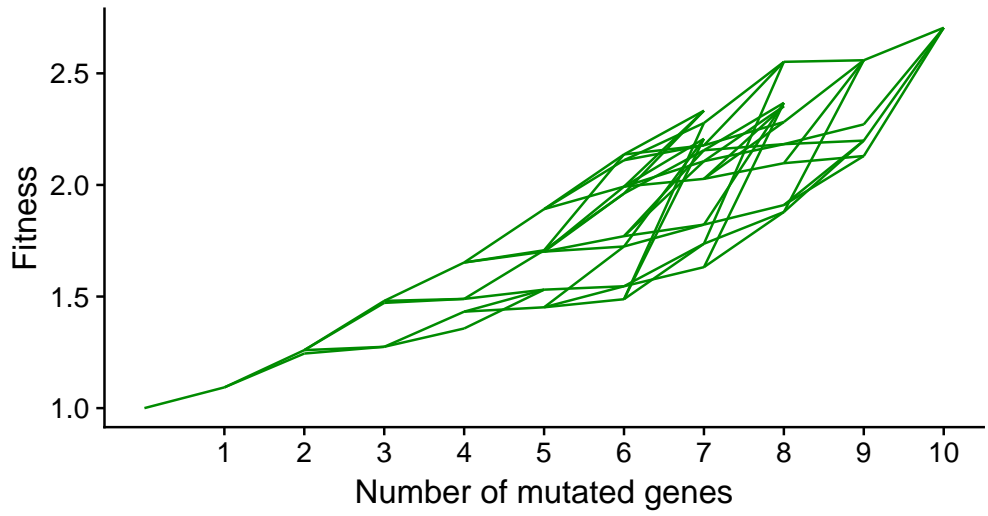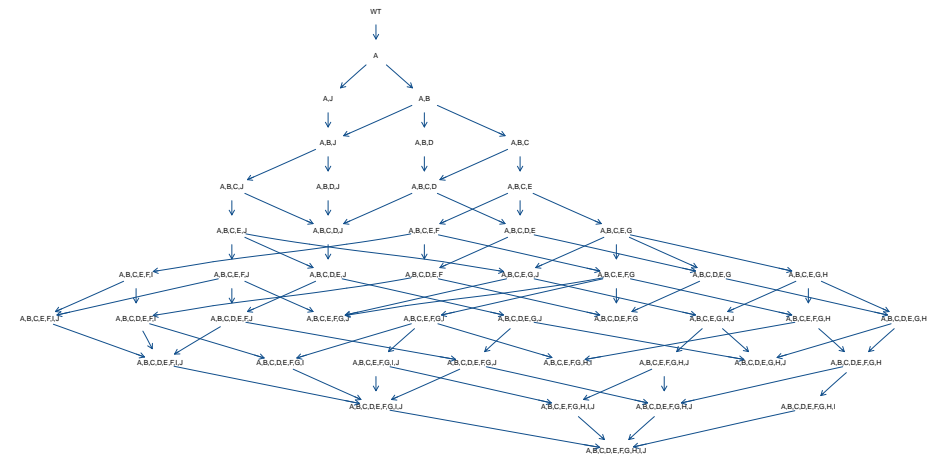



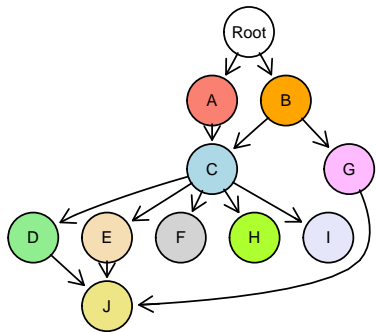

ID **hjGRWsJhOh106RXPY**  
 acc genotypes **78**  
 peaks no back **8**  
 removed edges **48**  
 prop rem edges **0.217**

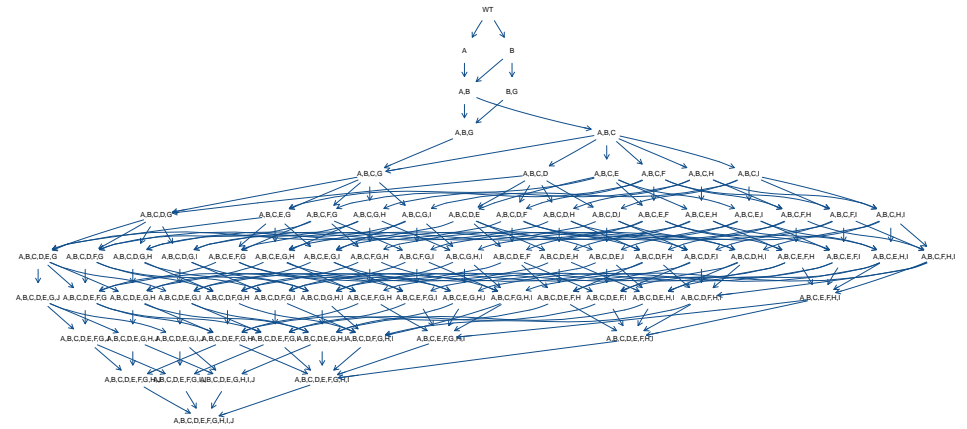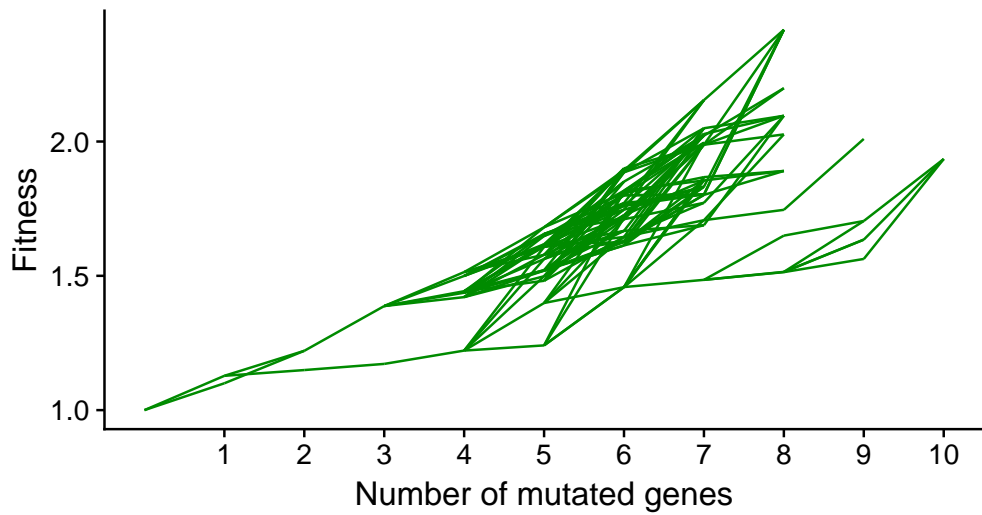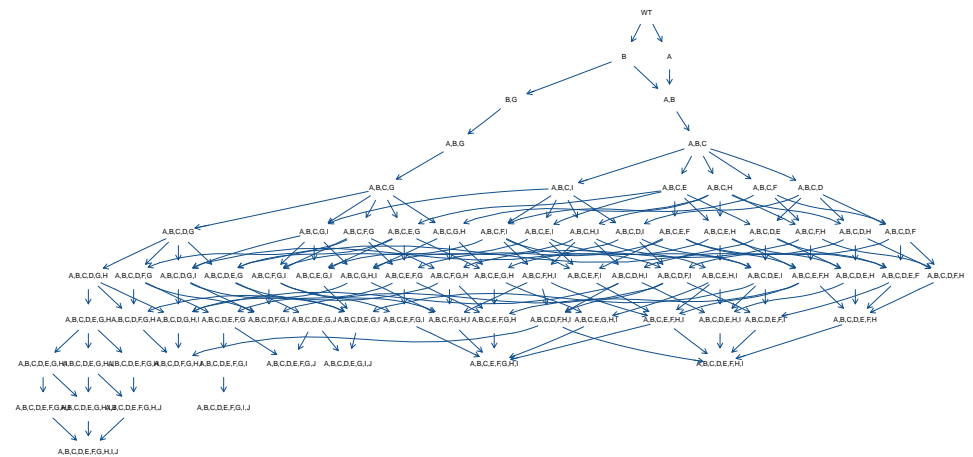

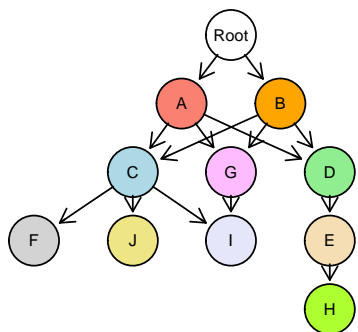

ID HjmKaDaJUp3CbAMd  
 acc genotypes 59  
 peaks no back 9  
 removed edges 21  
 prop rem edges 0.152

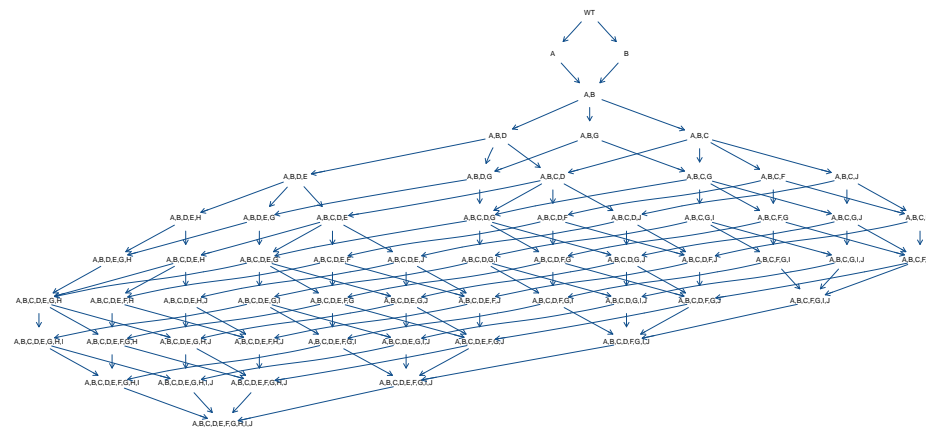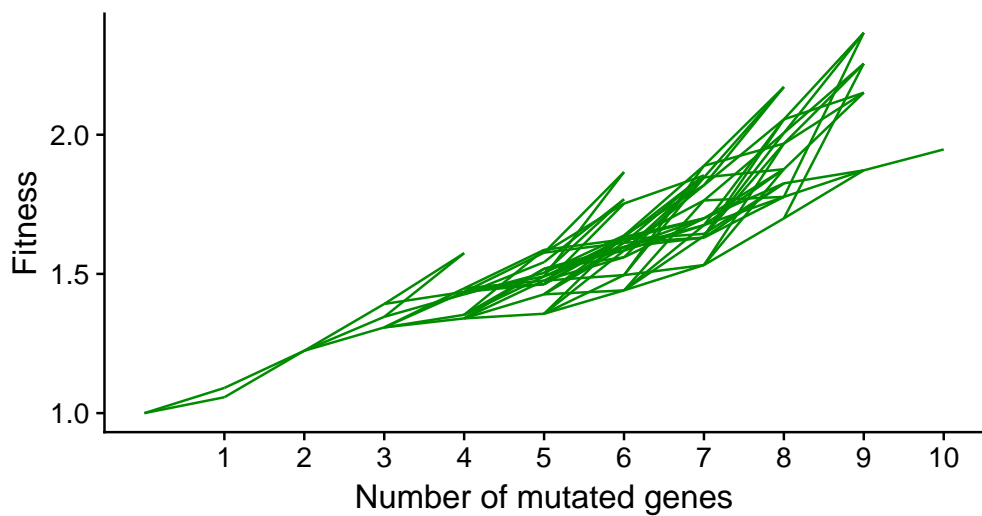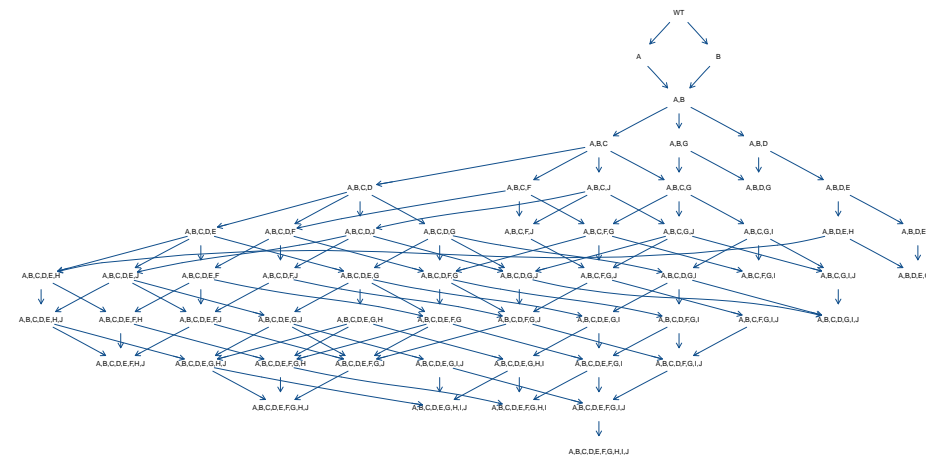

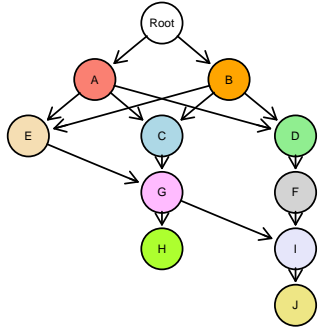

ID **hootgr4D2eT9wPQw**  
 acc genotypes **25**  
 peaks no back **2**  
 removed edges **3**  
 prop rem edges **0.075**

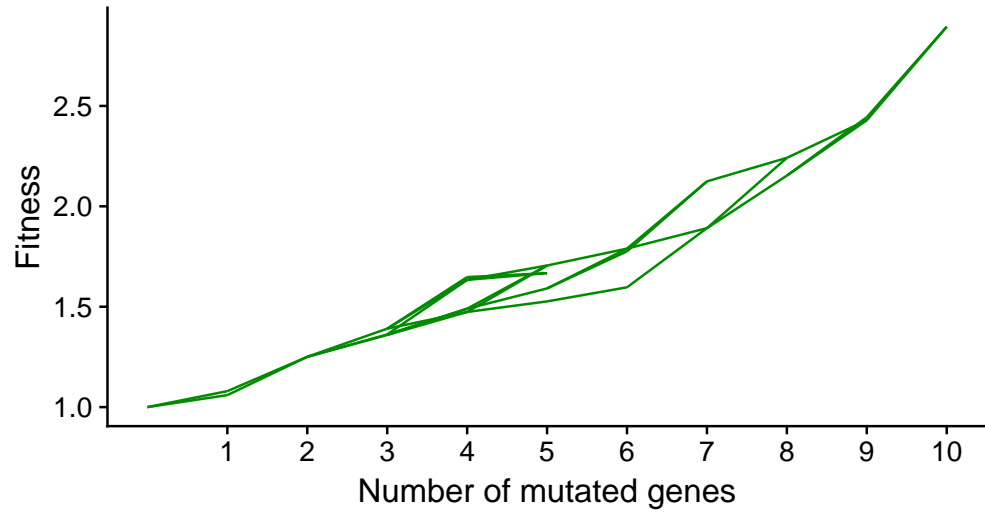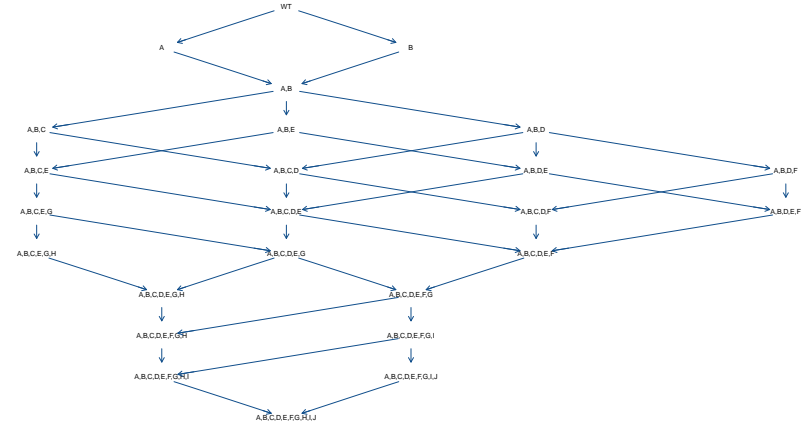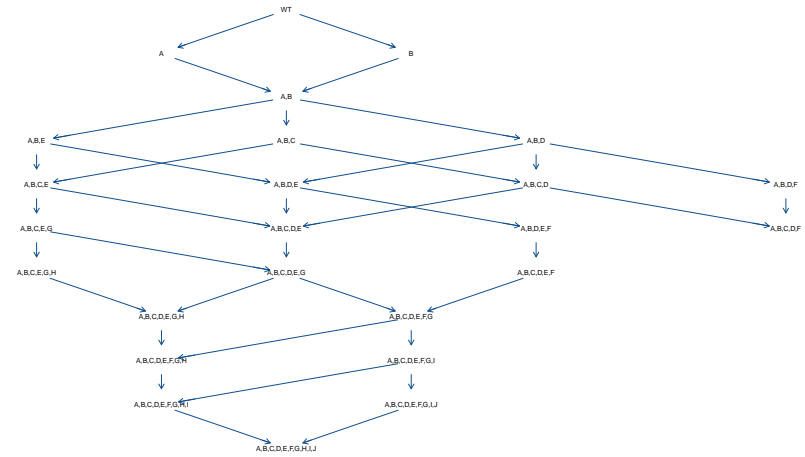

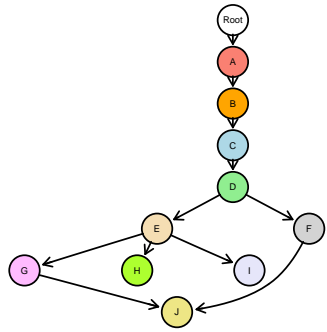

ID i210cnkWHYkaWwI3I  
 acc genotypes 26  
 peaks no back 4  
 removed edges 7  
 prop rem edges 0.149

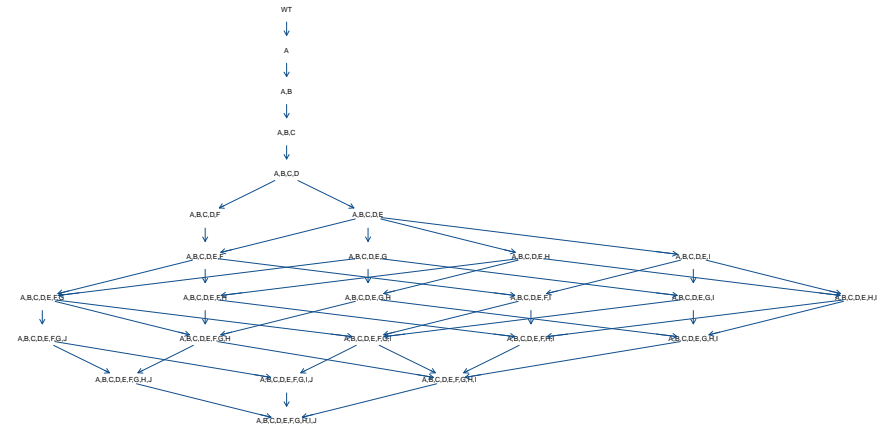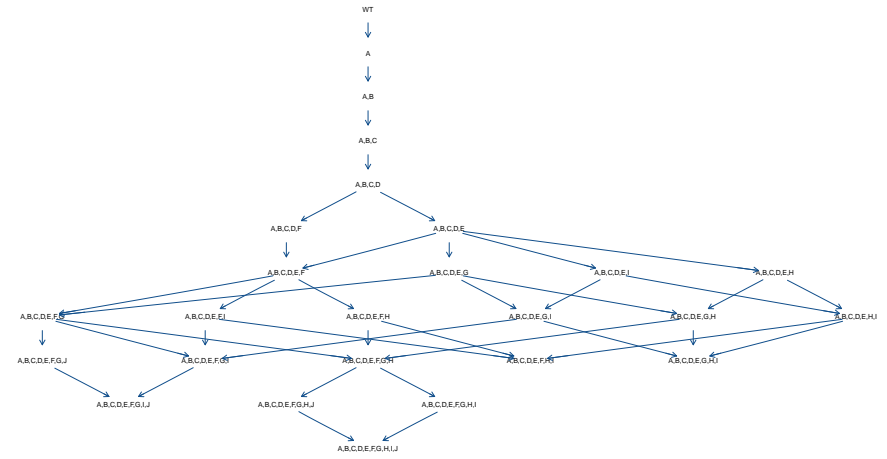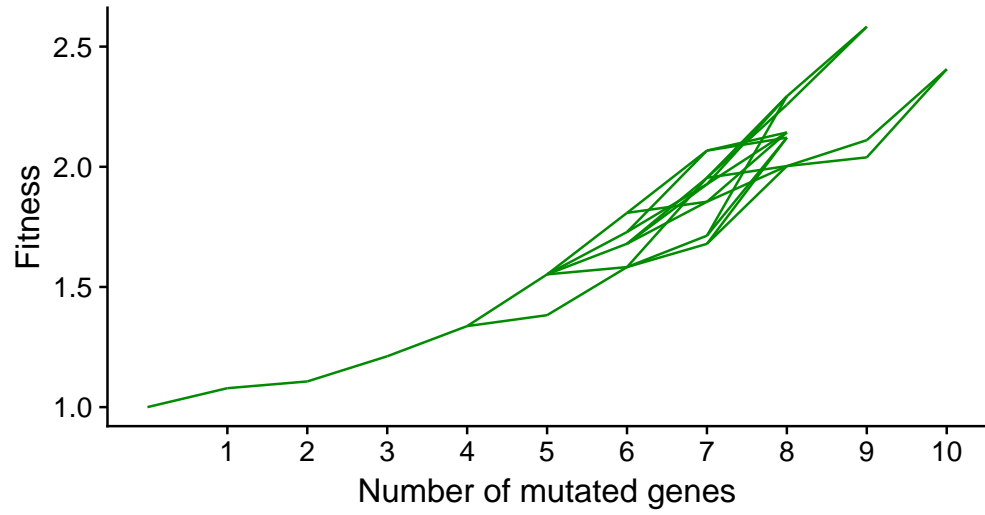

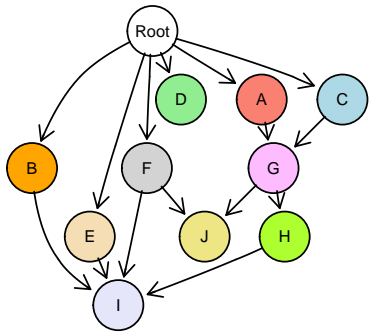

ID **l9aZnFSBnGVPEGvO**  
 acc genotypes **116**  
 peaks no back **14**  
 removed edges **89**  
 prop rem edges **0.259**

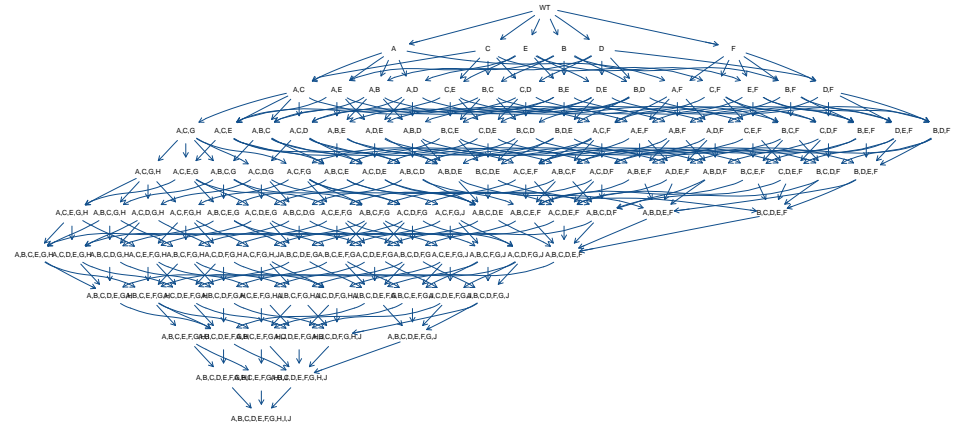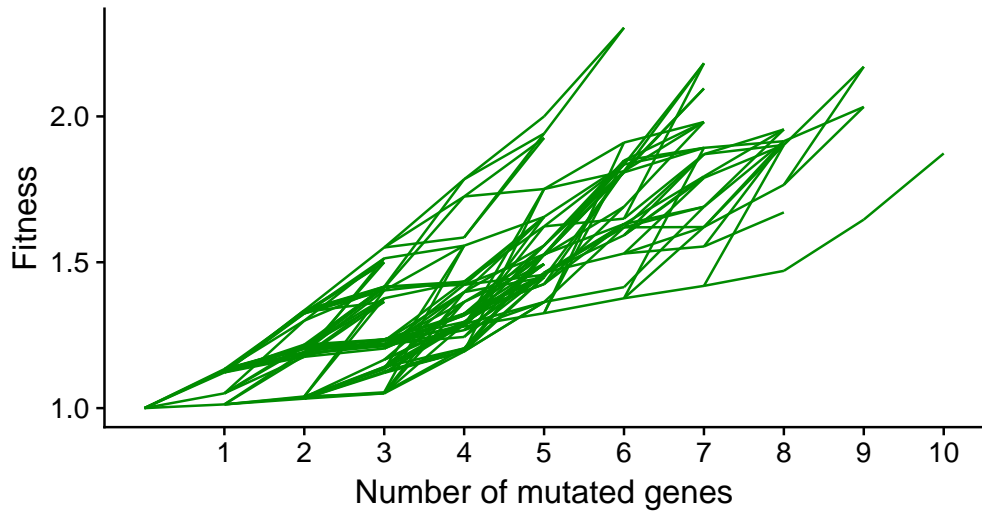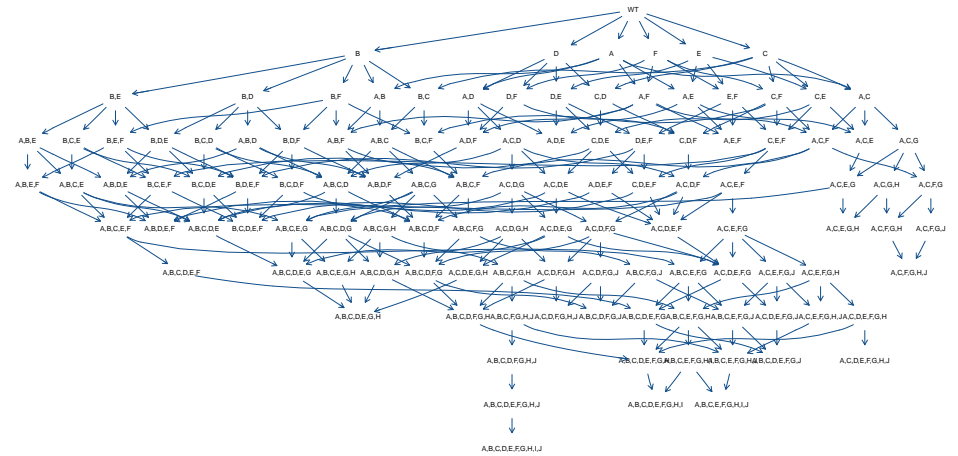

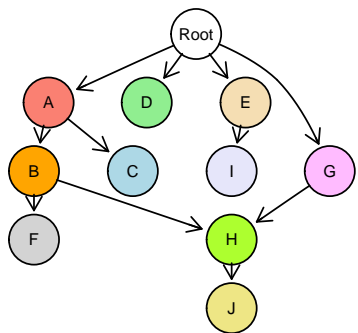

ID **ibcyCqVRdZgkjmP**  
 acc genotypes **132**  
 peaks no back 13  
 removed edges 62  
 prop rem edges 0.16

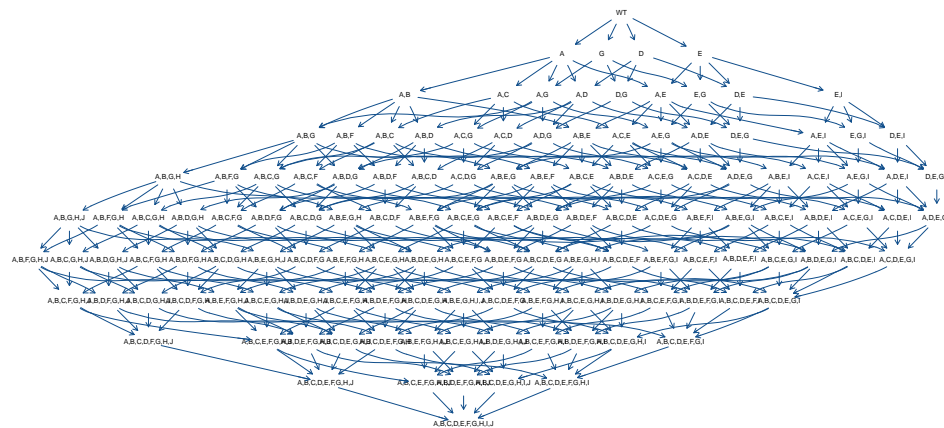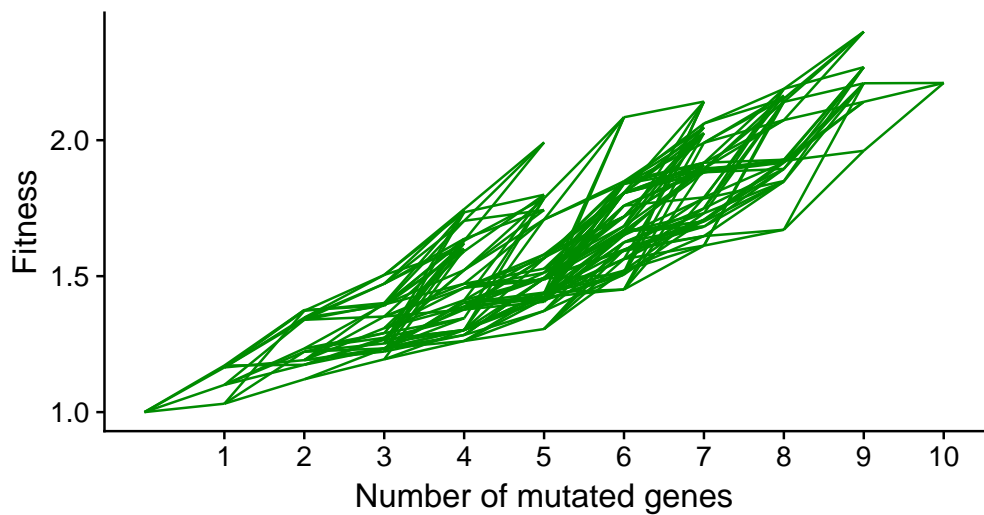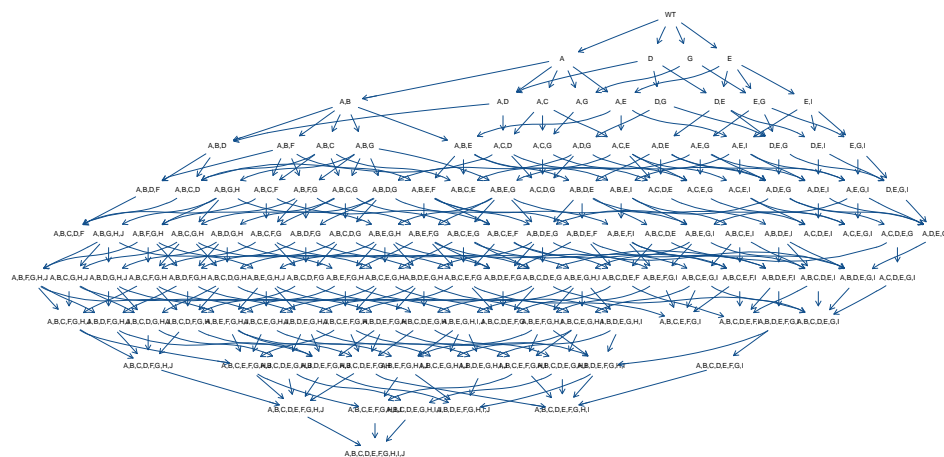

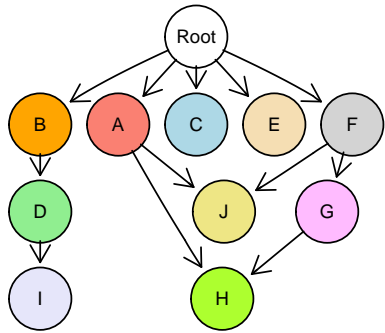

ID **lhbe9R5g4X8LVErf**  
 acc genotypes **160**  
 peaks no back **12**  
 removed edges **76**  
 prop rem edges **0.156**

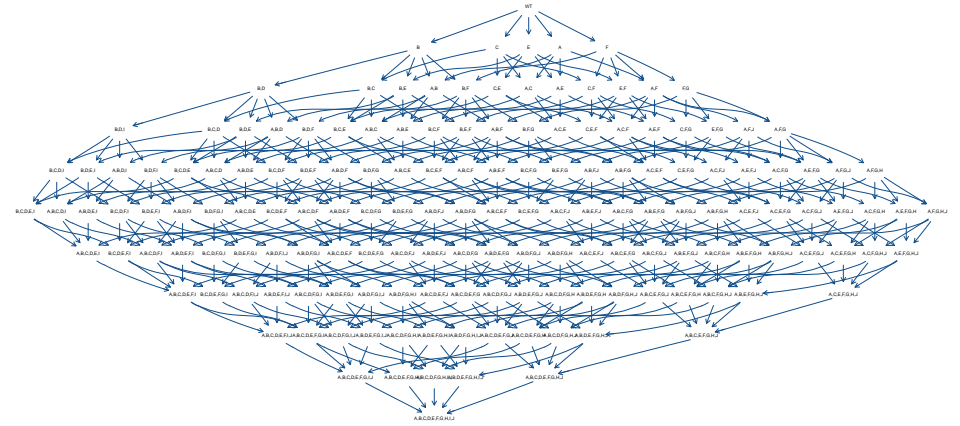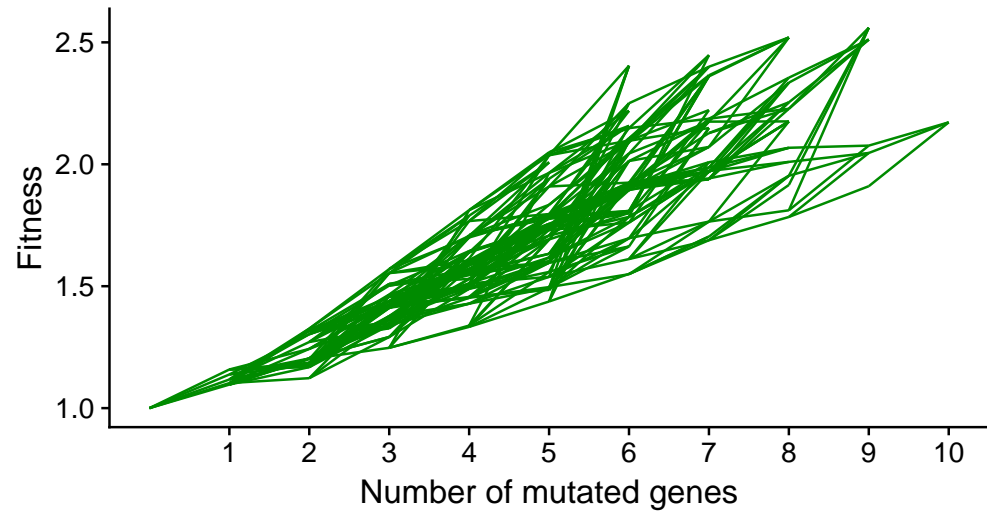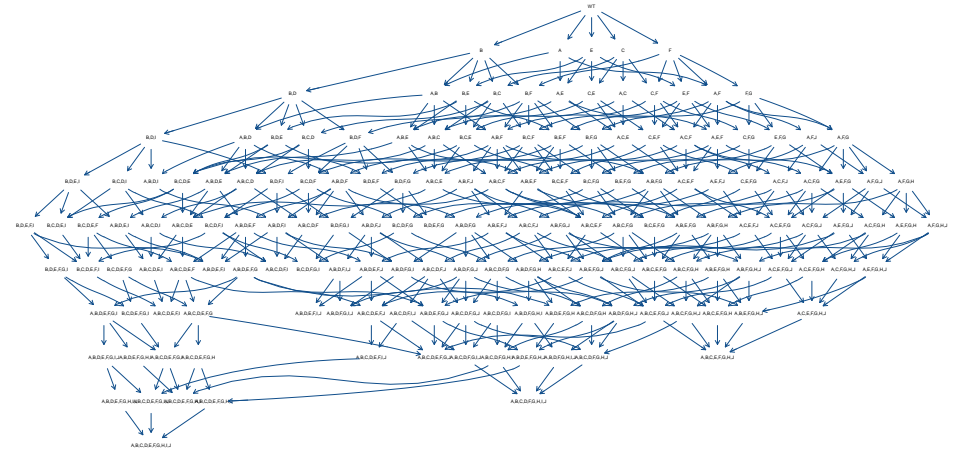

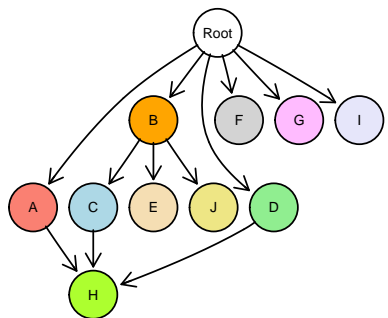

ID IJHDmelG9vA10Rtnv  
 acc genotypes 320  
 peaks no back 21  
 removed edges 305  
 prop rem edges 0.244

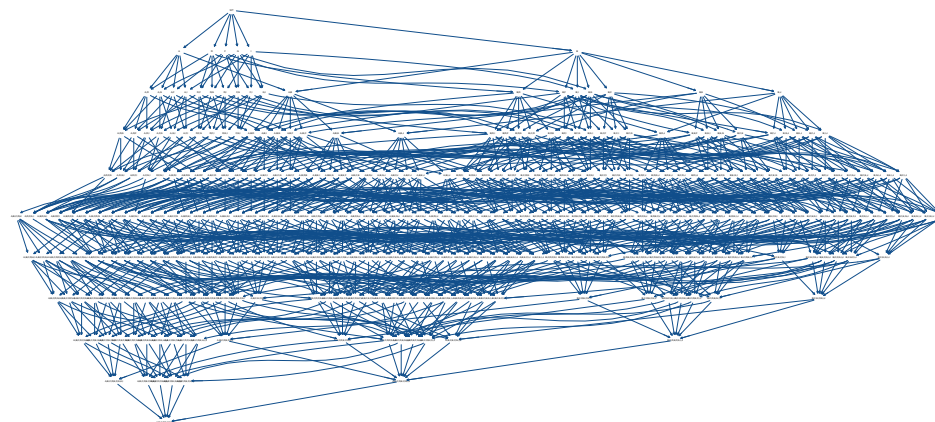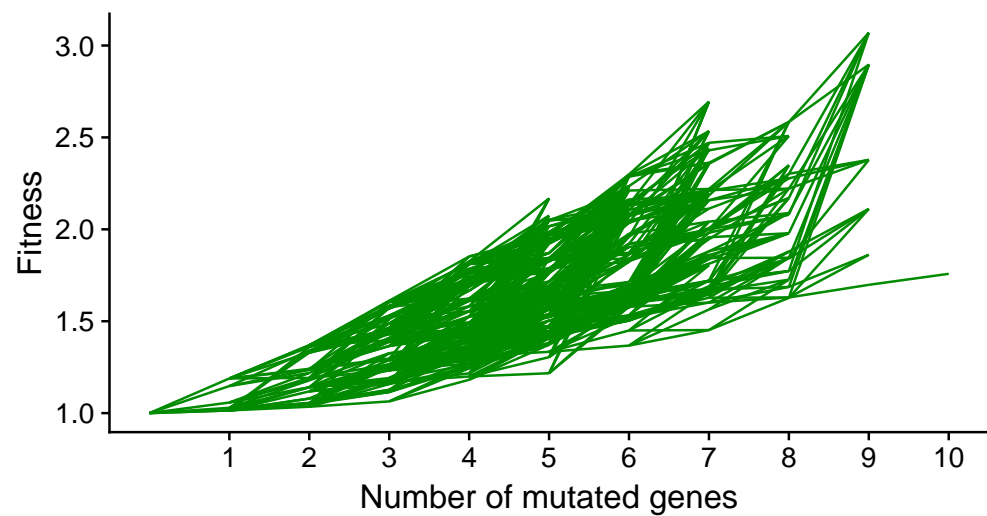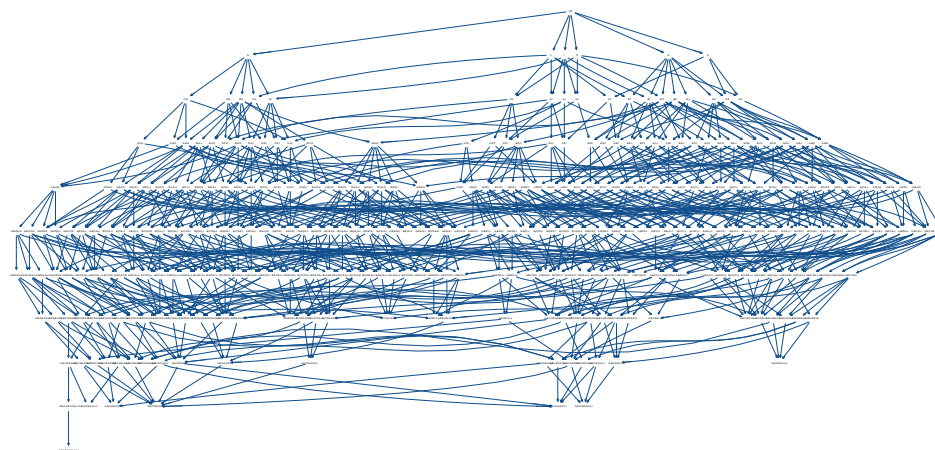



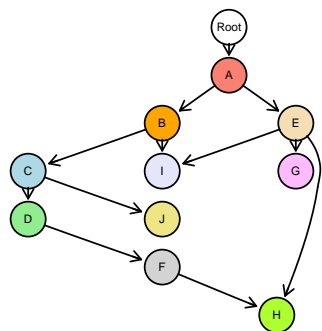

ID InQKKeVqQBh5g2SM  
 acc genotypes 47  
 peaks no back 7  
 removed edges 18  
 prop rem edges 0.178

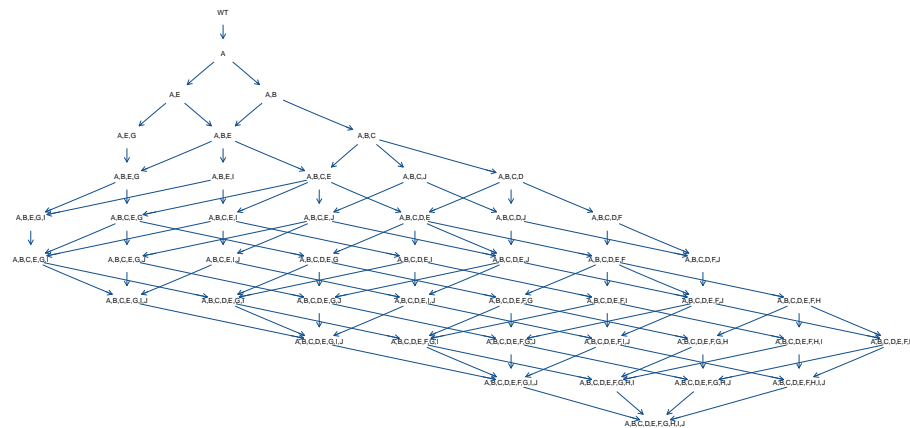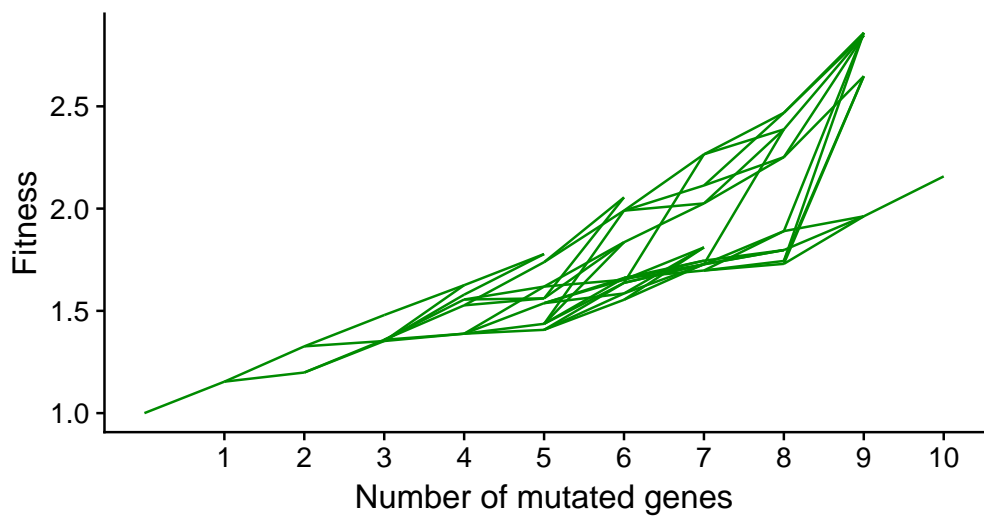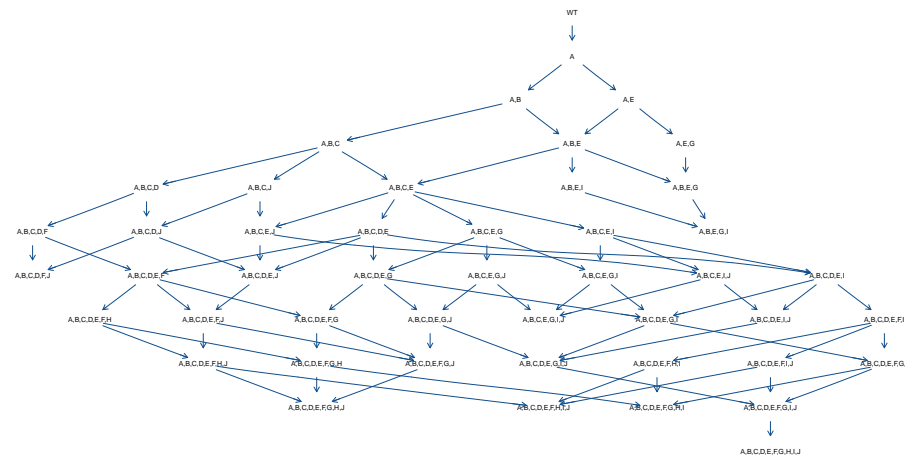

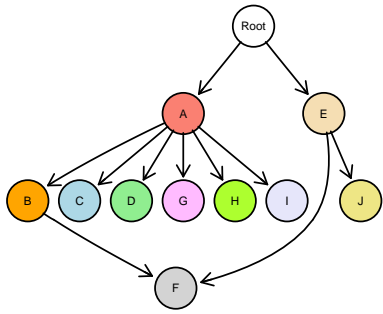

ID [iudi9ykQn8Kp10Gil](#)  
 acc genotypes 259  
 peaks no back 19  
 removed edges 140  
 prop rem edges 0.145

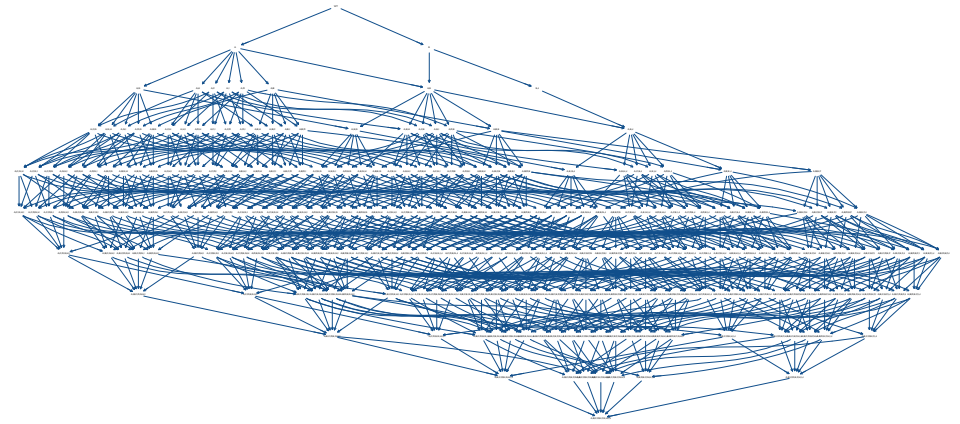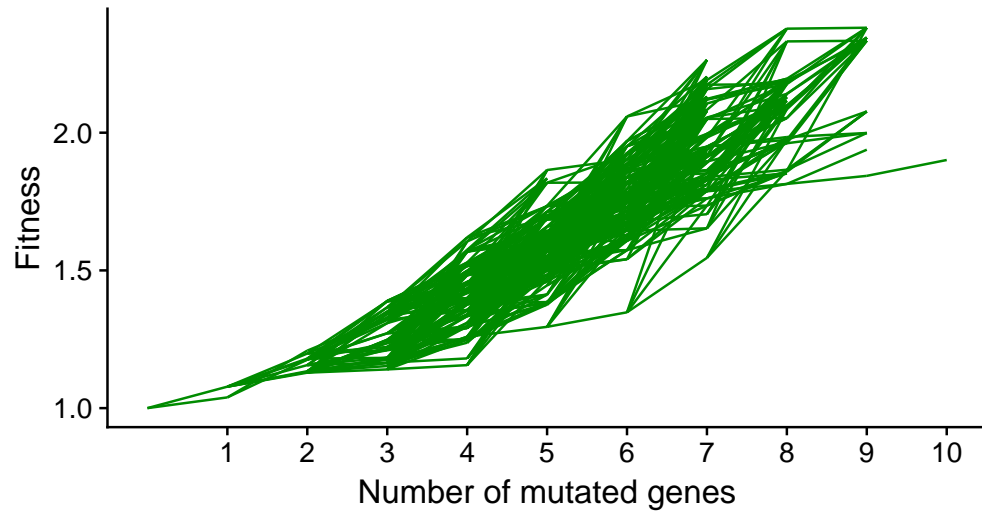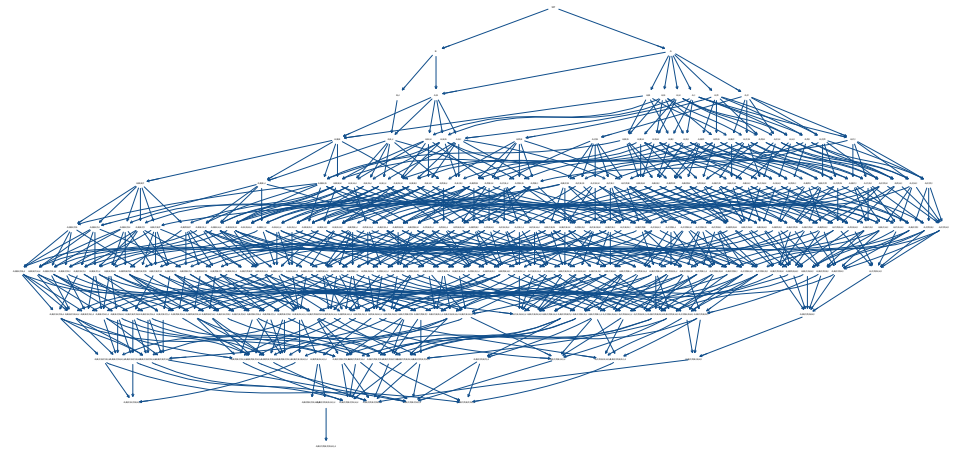

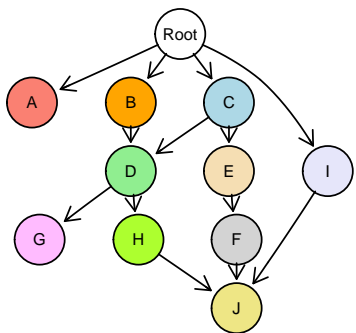

ID **iyU83TTZklieN106**  
 acc genotypes **84**  
 peaks no back **9**  
 removed edges **37**  
 prop rem edges **0.168**

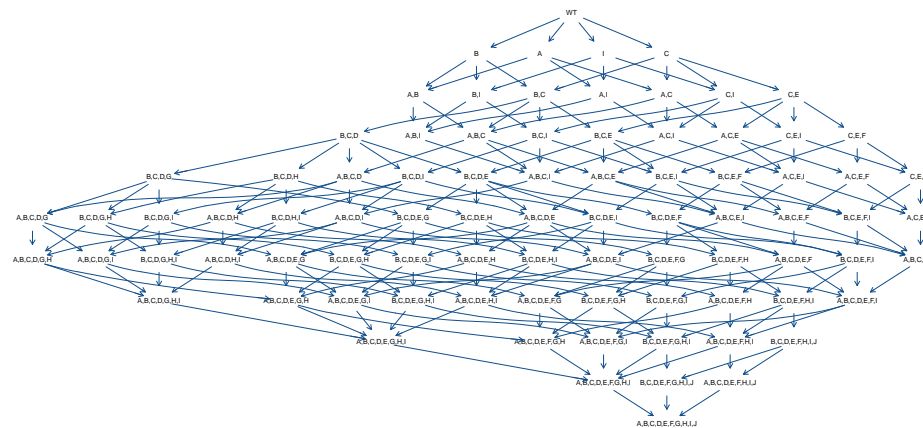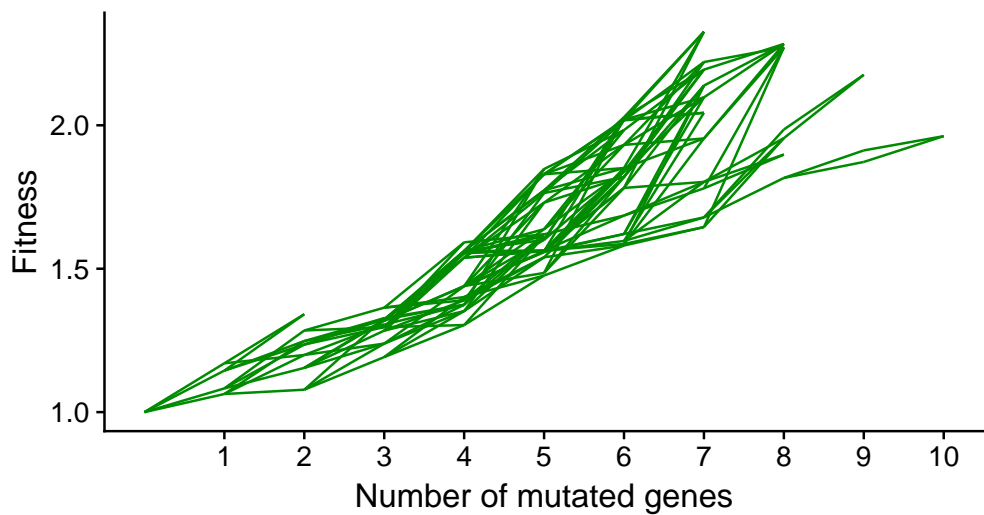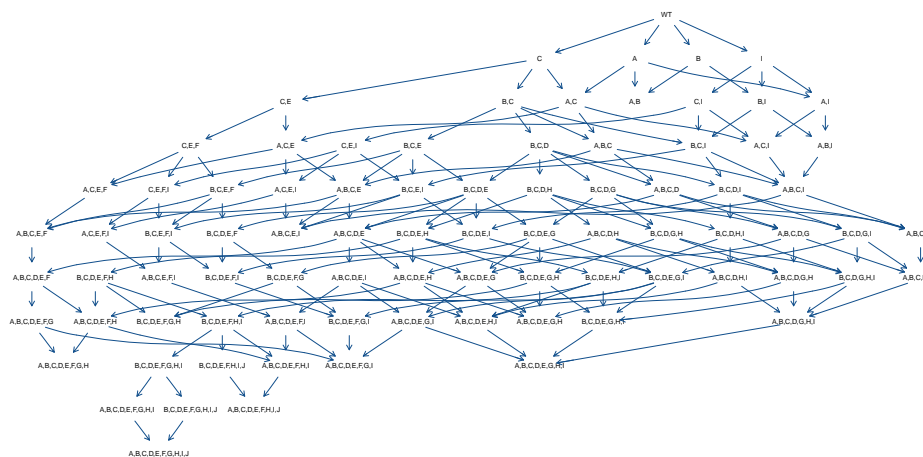

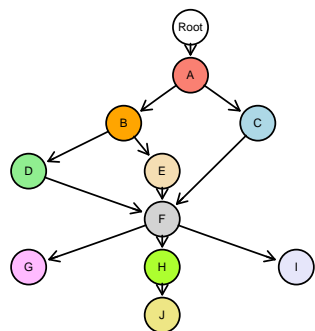

ID [iyF6c65slZnguySA](#)  
 acc genotypes 23  
 peaks no back 2  
 removed edges 2  
 prop rem edges 0.054

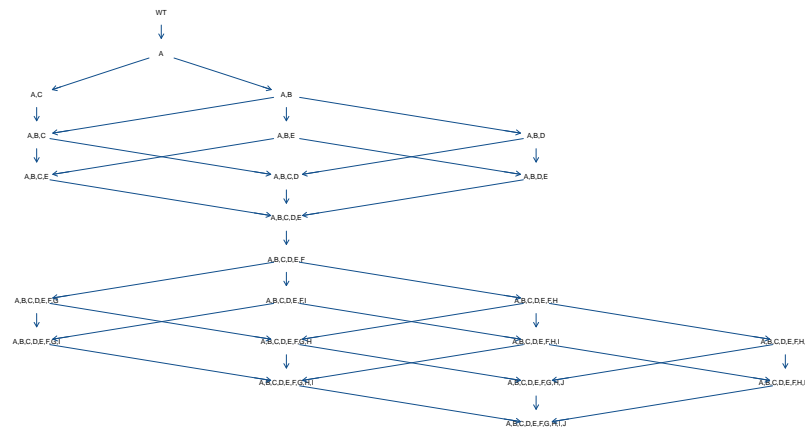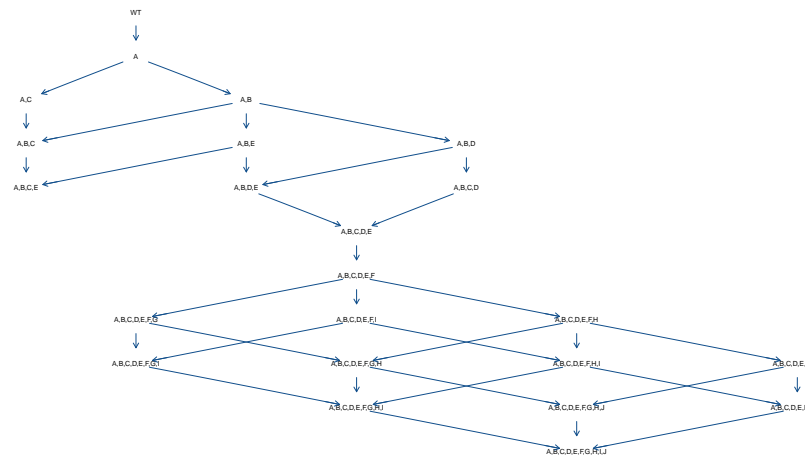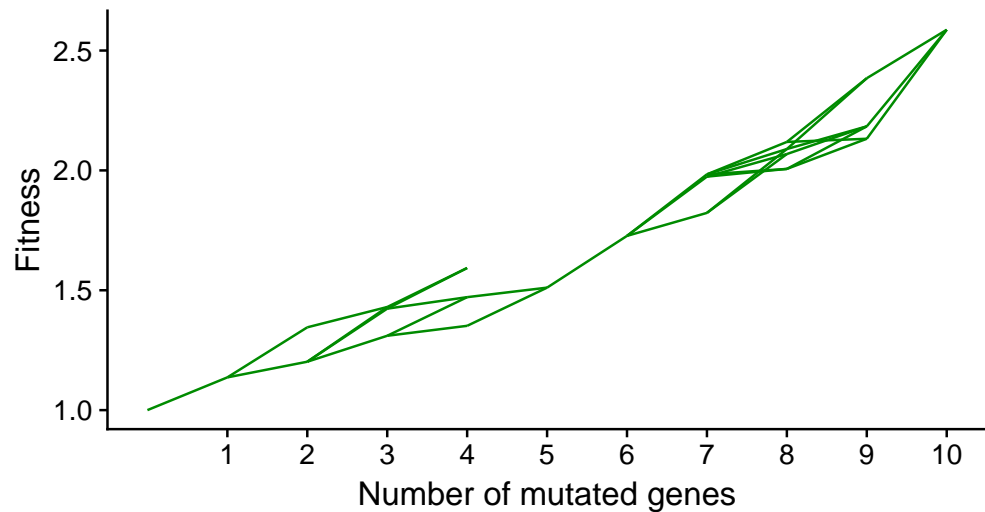

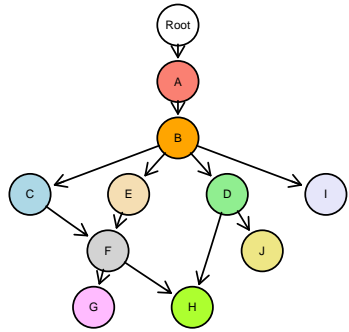

ID **iYOTCycsSTgt6LB1**  
 acc genotypes **46**  
 peaks no back **4**  
 removed edges **12**  
 prop rem edges **0.12**

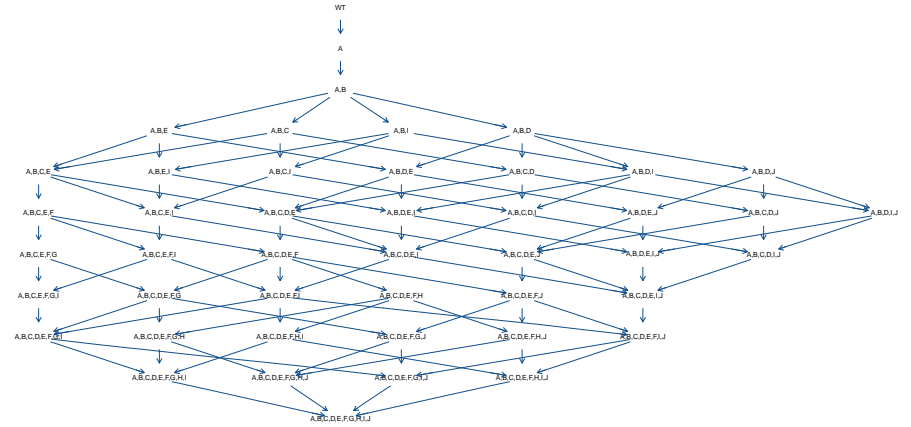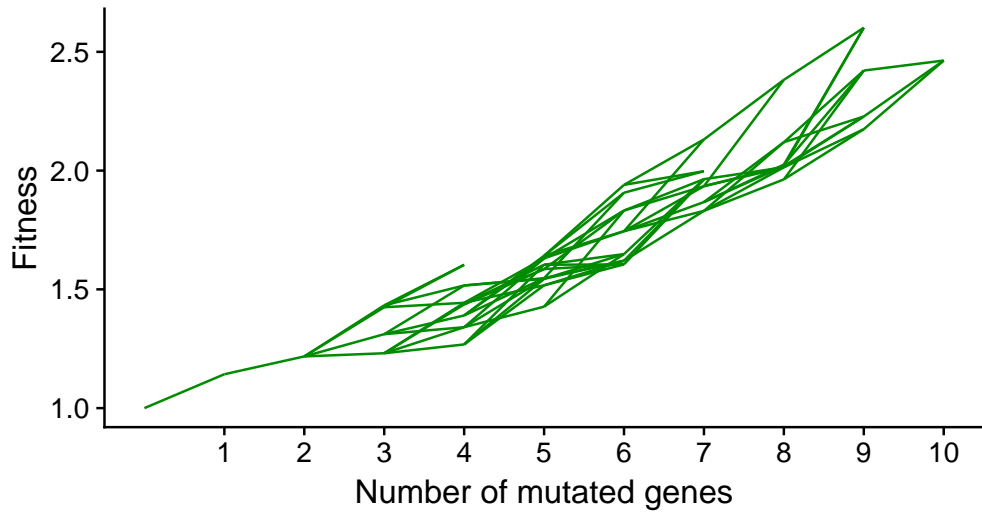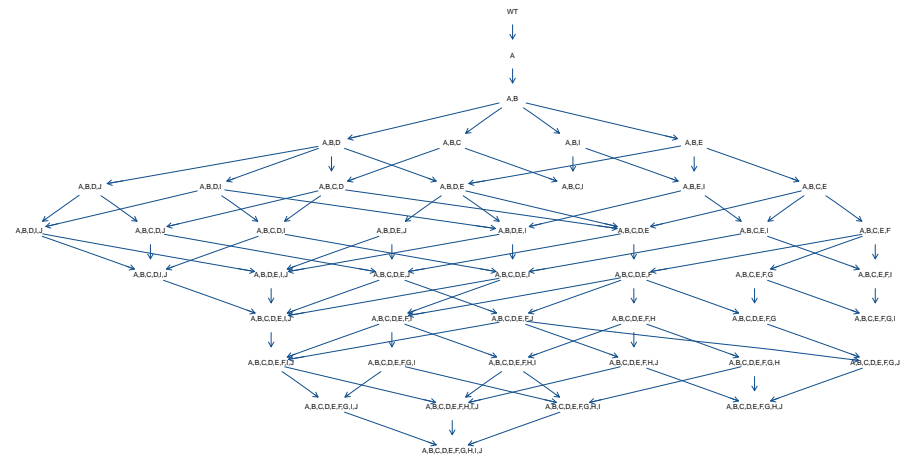

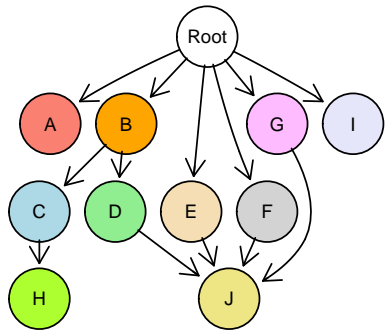

ID [ja5K99Pb6N9URztp](#)  
 acc genotypes 236  
 peaks no back 17  
 removed edges 192  
 prop rem edges 0.226

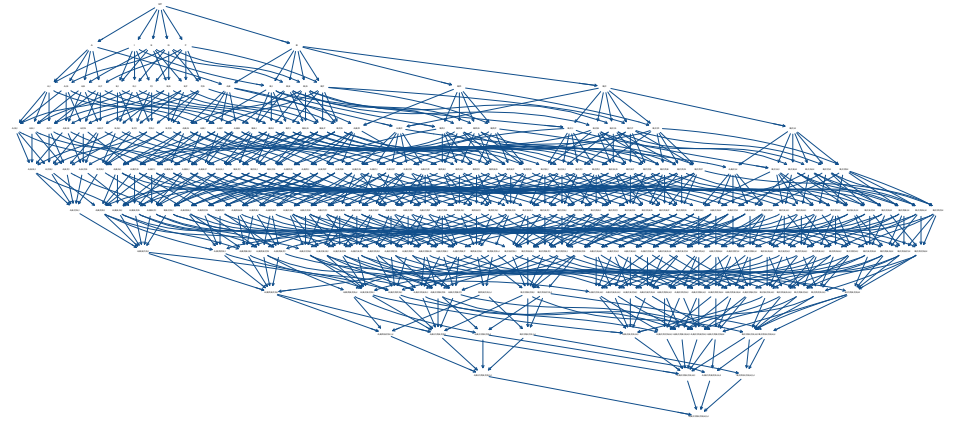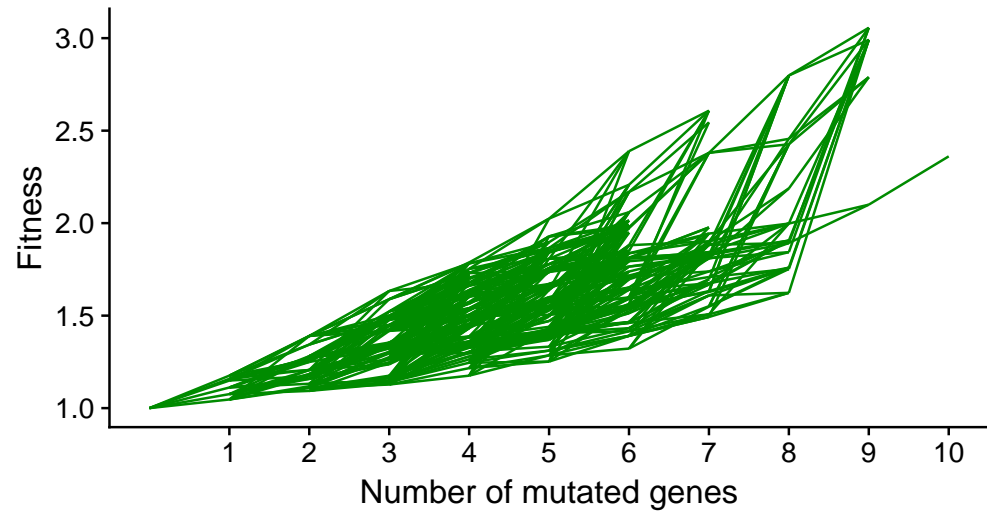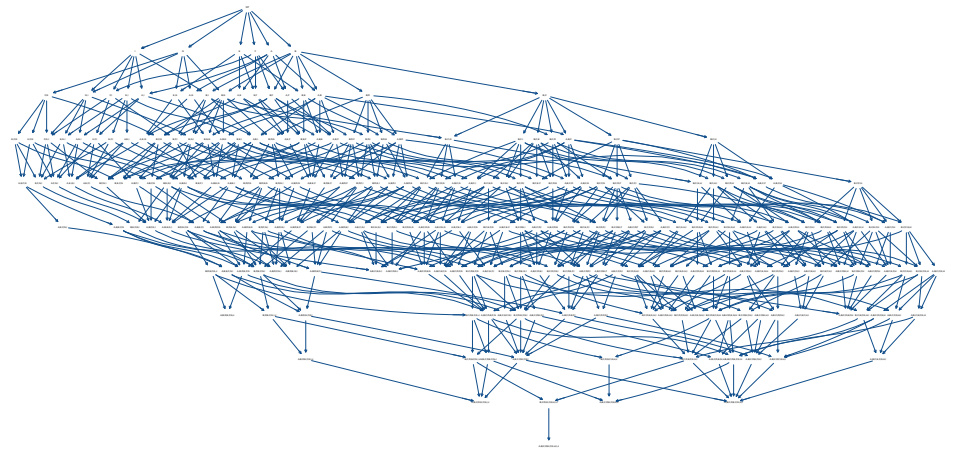

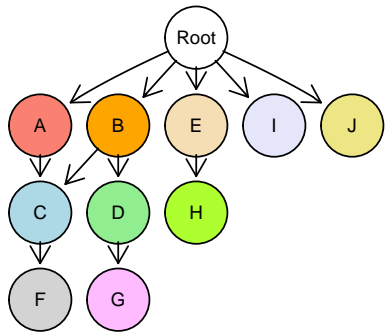

ID **jBiKG5Scuo10UsyUf**  
 acc genotypes **168**  
 peaks no back **14**  
 removed edges **111**  
 prop rem edges **0.213**

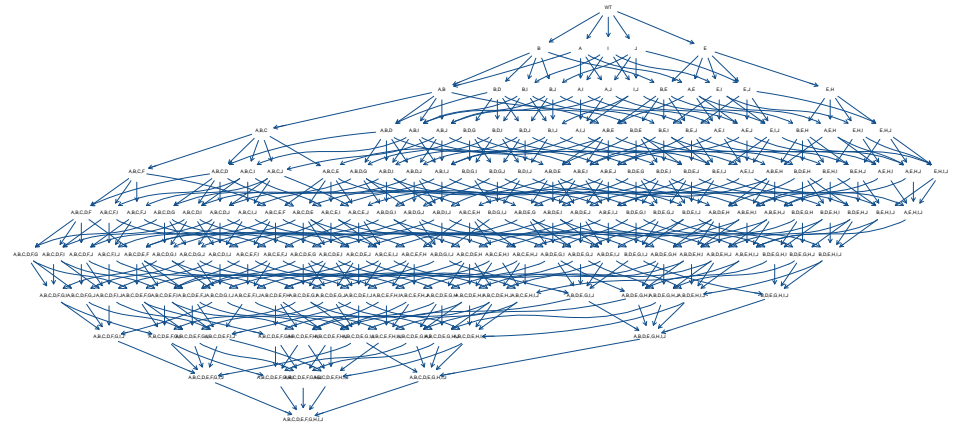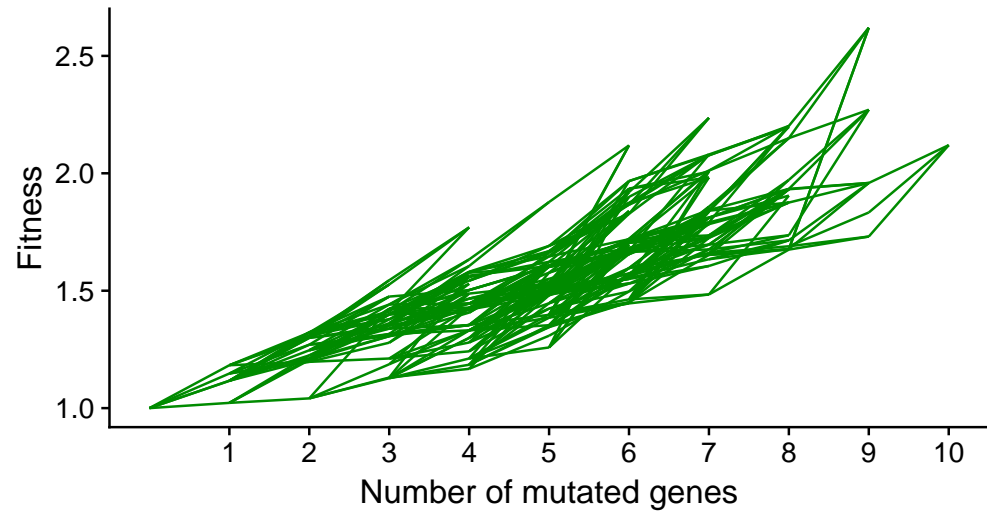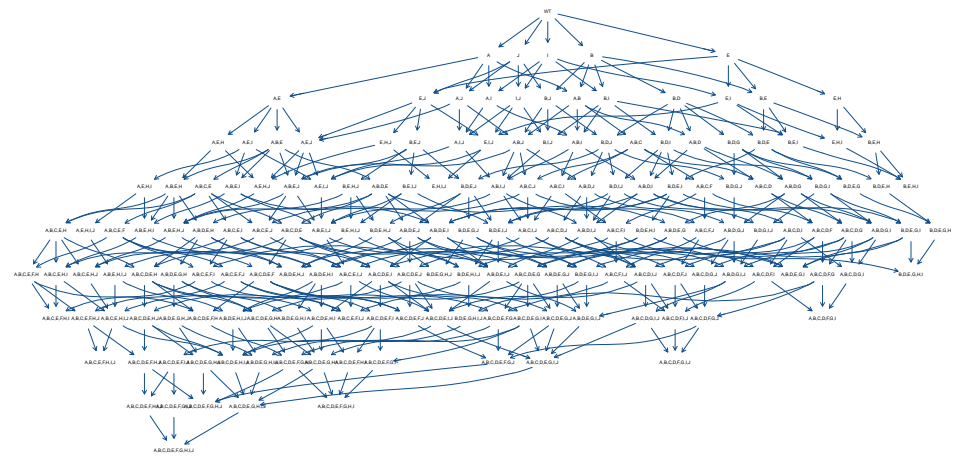

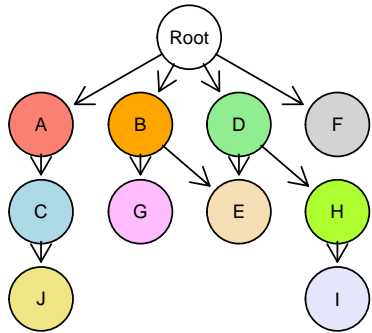

ID **jelgNCENfpAlgfTL**  
 acc genotypes **144**  
 peaks no back **15**  
 removed edges **89**  
 prop rem edges **0.212**

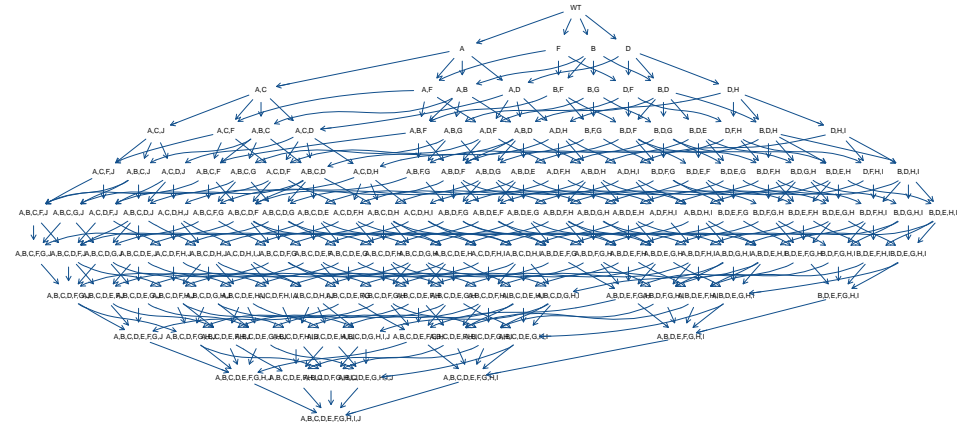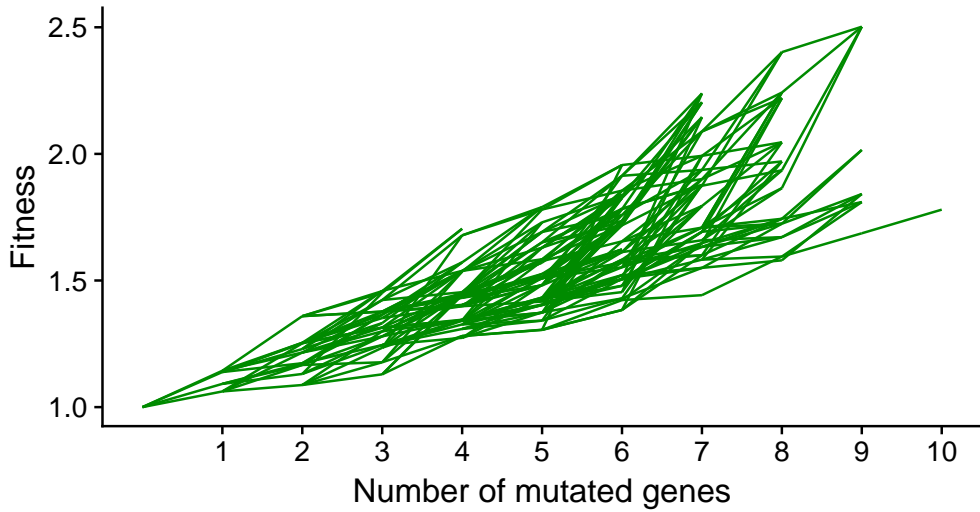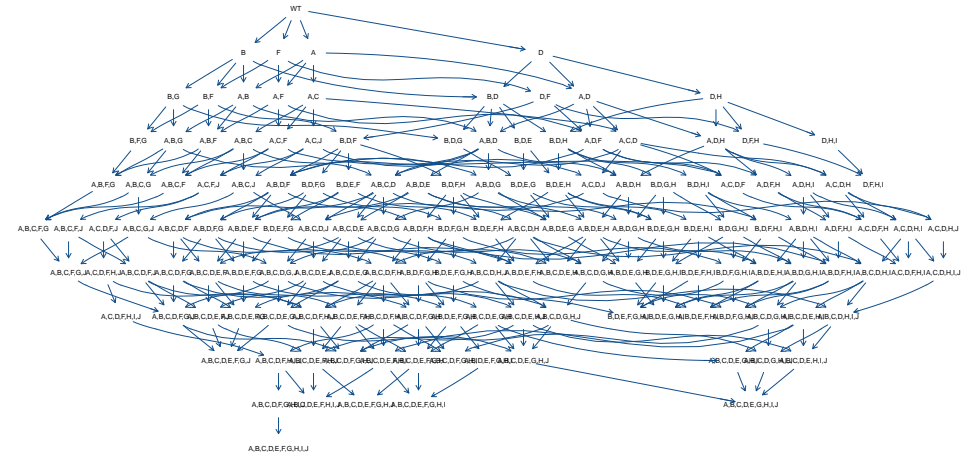



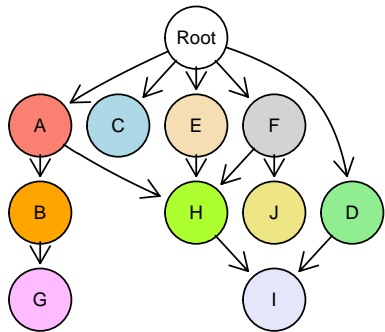

ID **k9iq8ysBwZDbv105Y**  
*acc genotypes* **132**  
*peaks no back* **12**  
*removed edges* **78**  
*prop rem edges* **0.201**

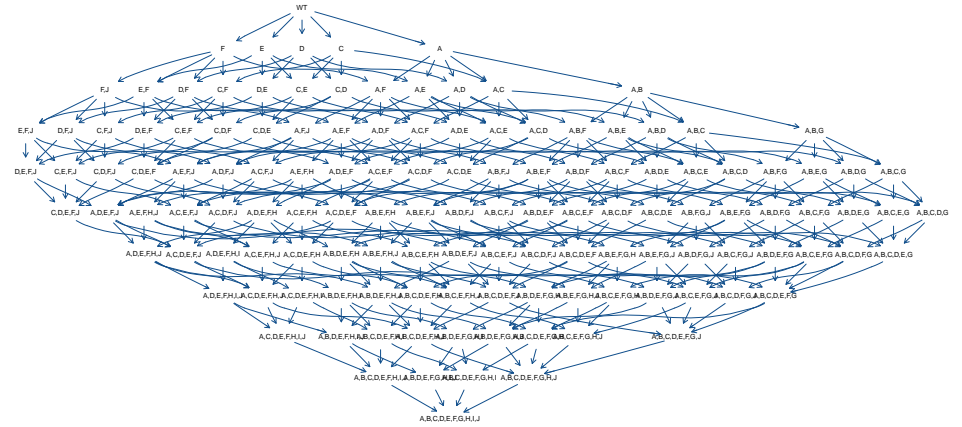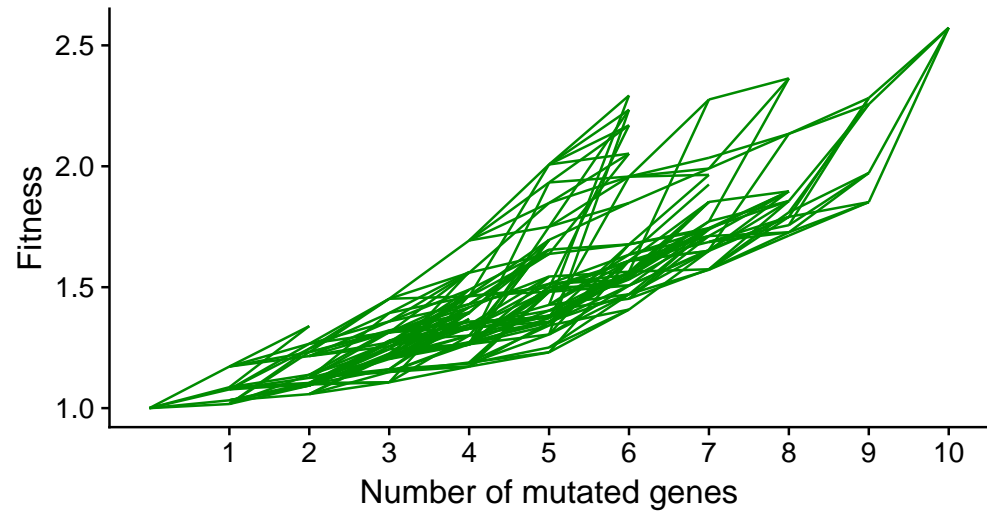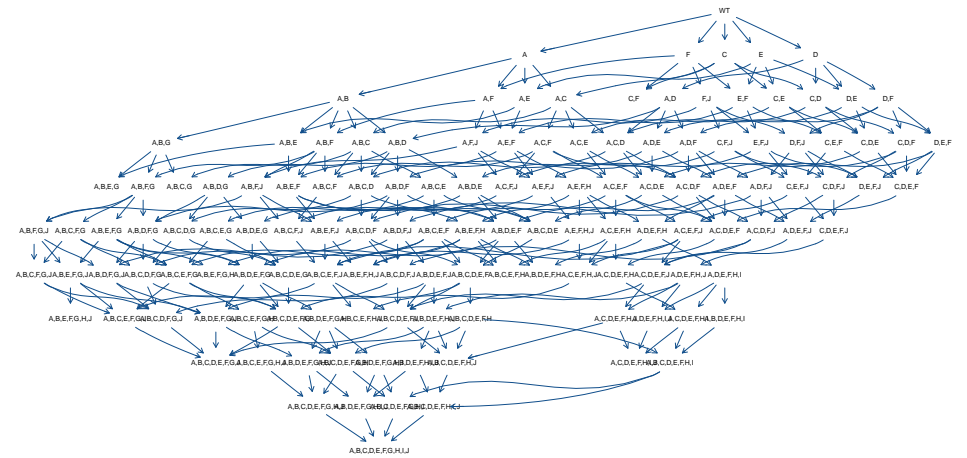

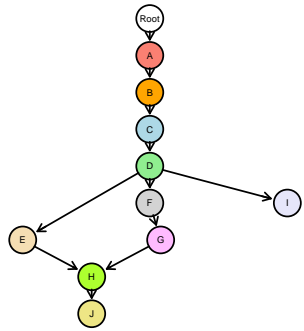

ID [KbbfhCf9UoSky10IE](#)  
 acc genotypes 20  
 peaks no back 2  
 removed edges 1  
 prop rem edges 0.033

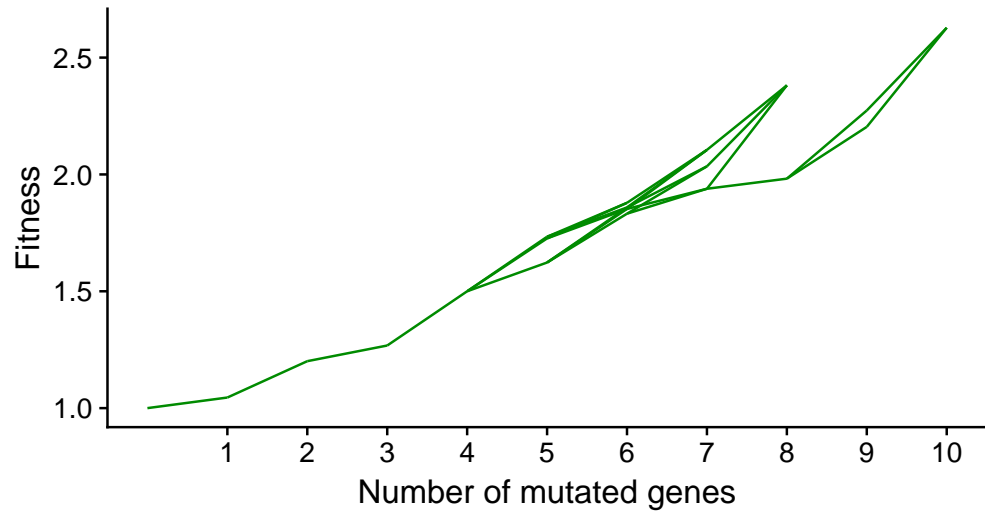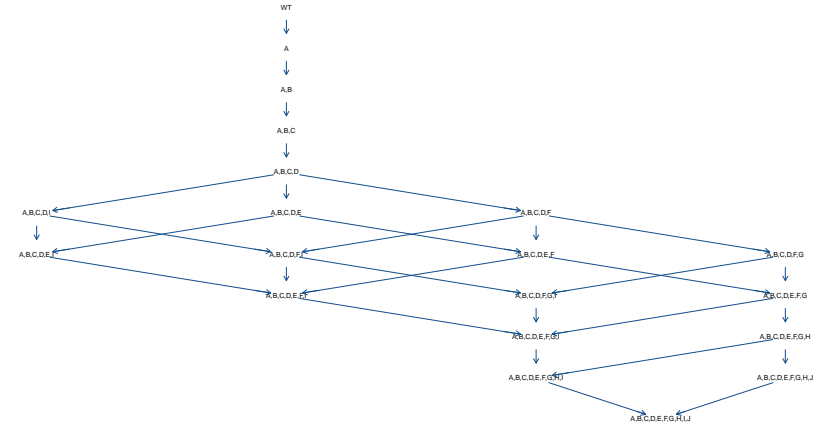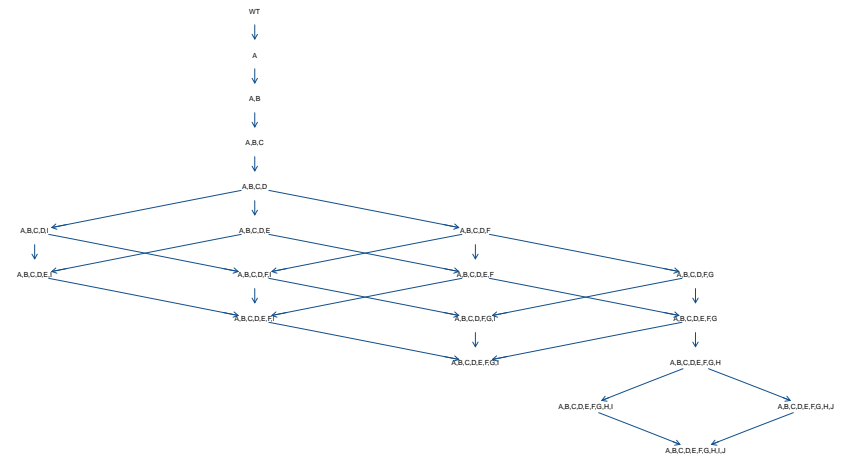

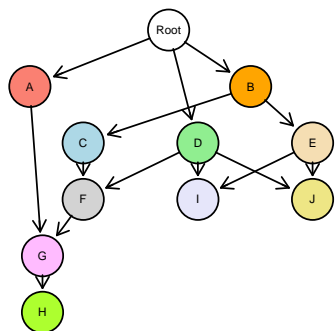

ID KEEVYIND4AYuzrNr  
 acc genotypes 52  
 peaks no back 7  
 removed edges 19  
 prop rem edges 0.168

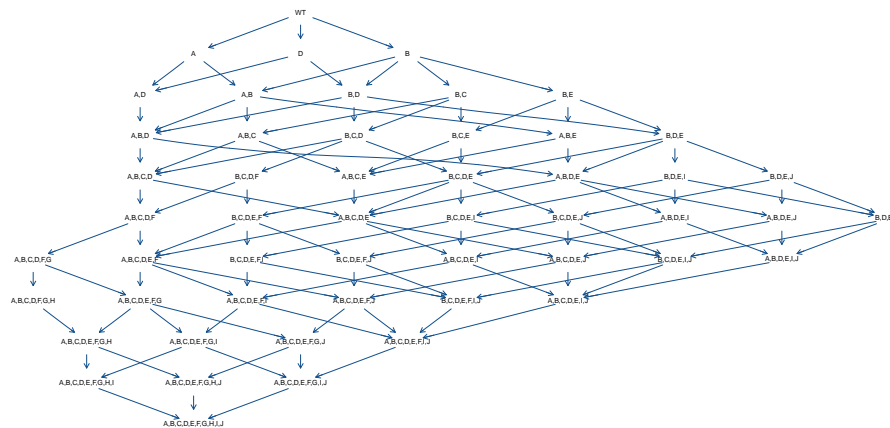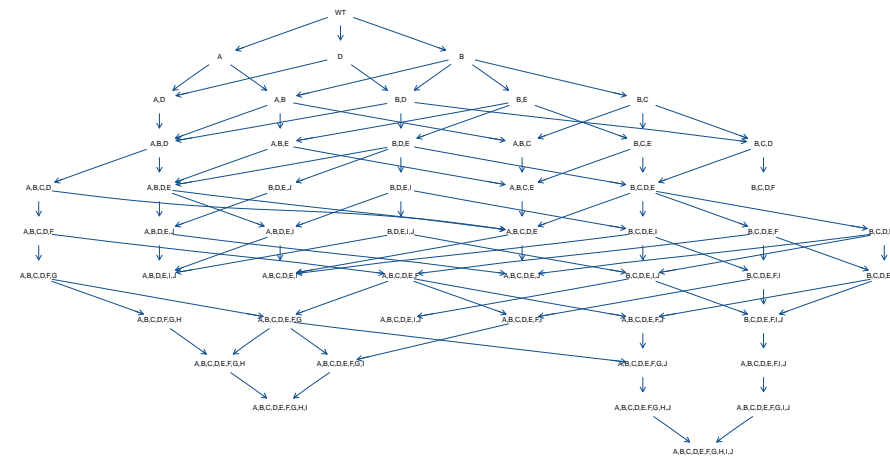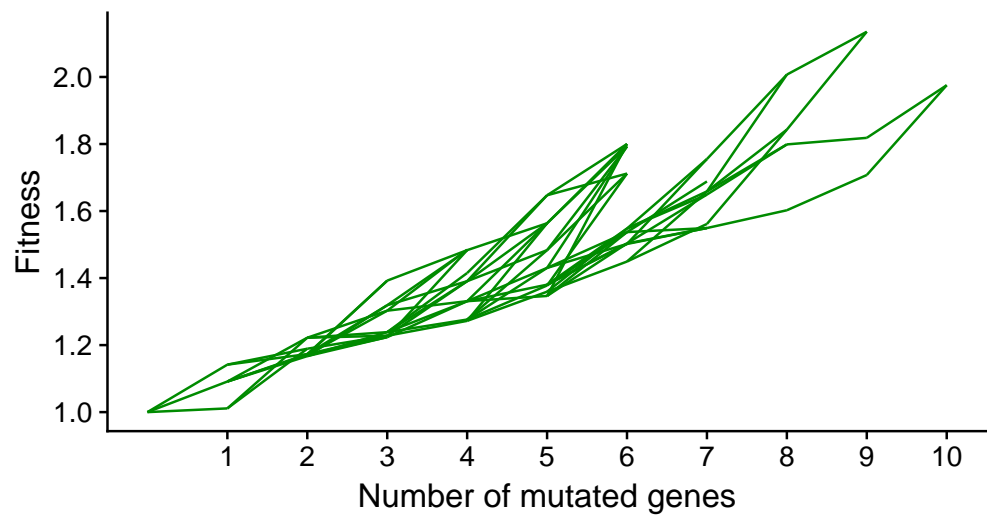

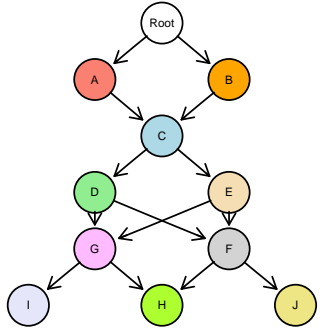

ID KpASsdOSpsoQXAqF  
 acc genotypes 20  
 peaks no back 5  
 removed edges 5  
 prop rem edges 0.172

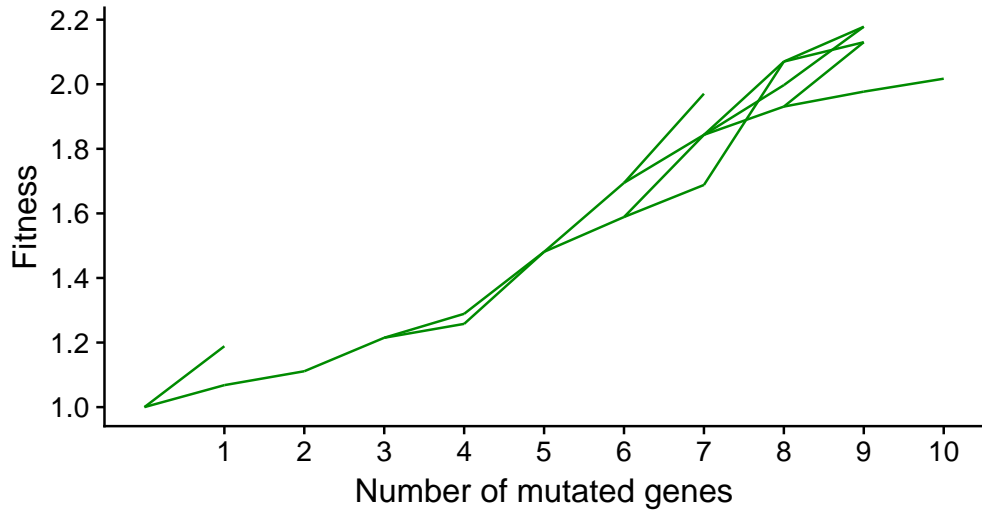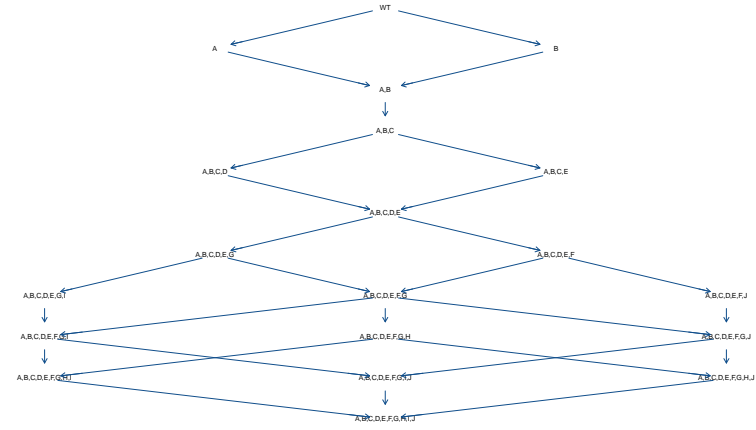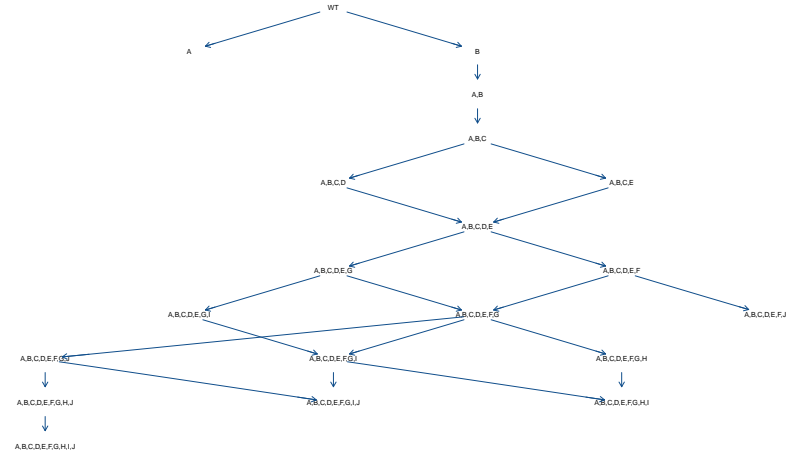

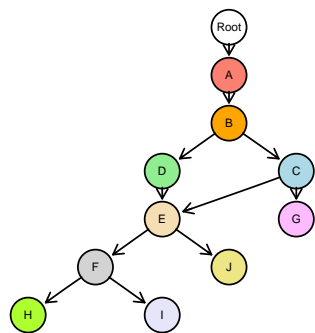

ID **KTPDesITE10I68VaZ**  
 acc genotypes **28**  
 peaks no back **5**  
 removed edges **6**  
 prop rem edges **0.118**

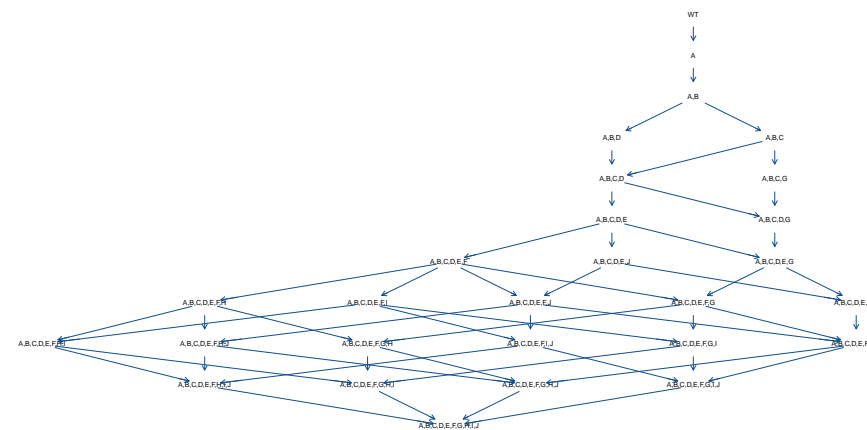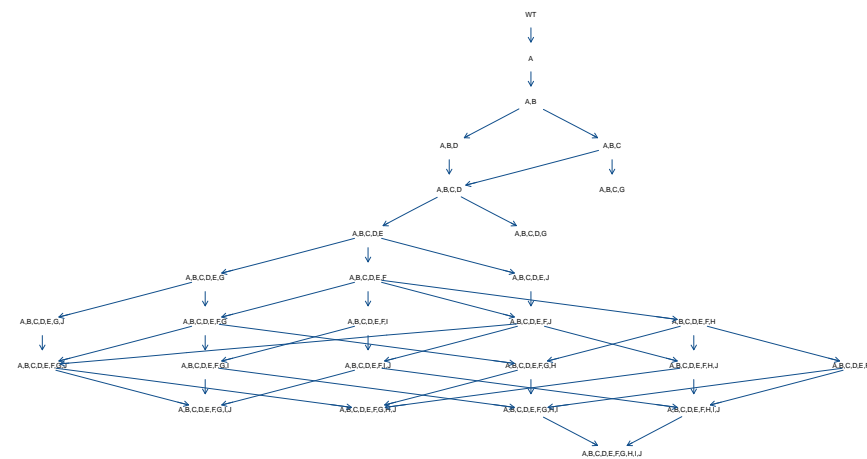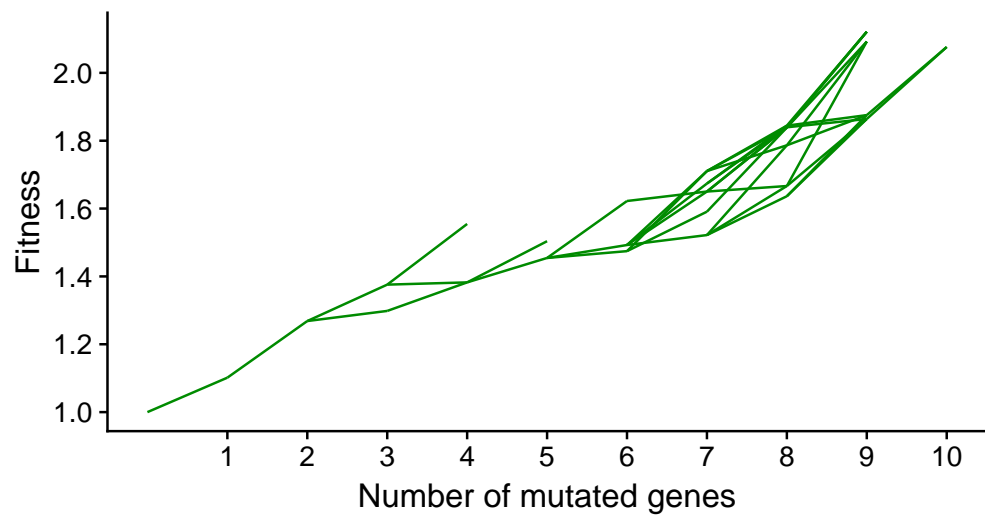

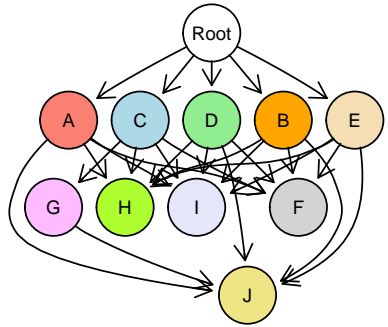

ID [ku3OjGvU29I3Hlrg](#)  
 acc genotypes 70  
 peaks no back 9  
 removed edges 32  
 prop rem edges 0.179

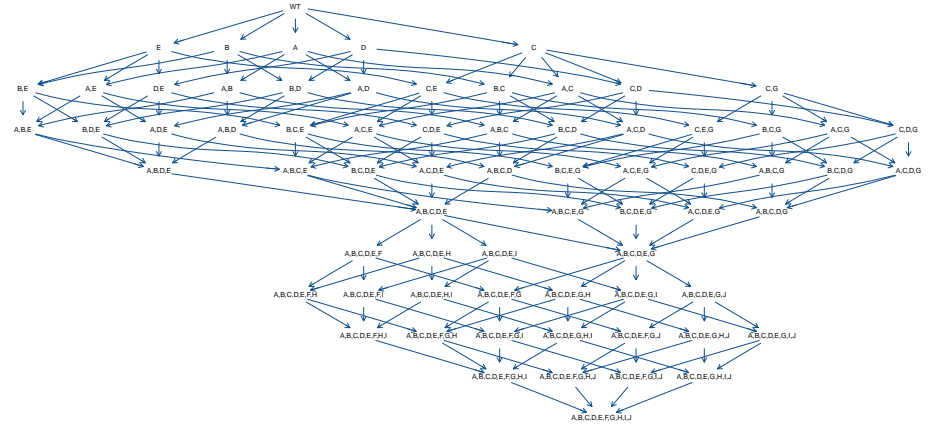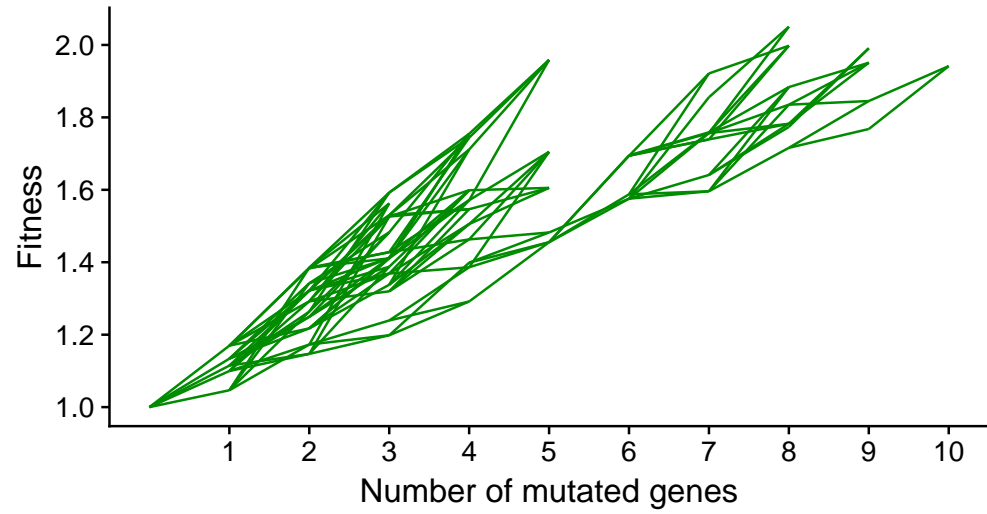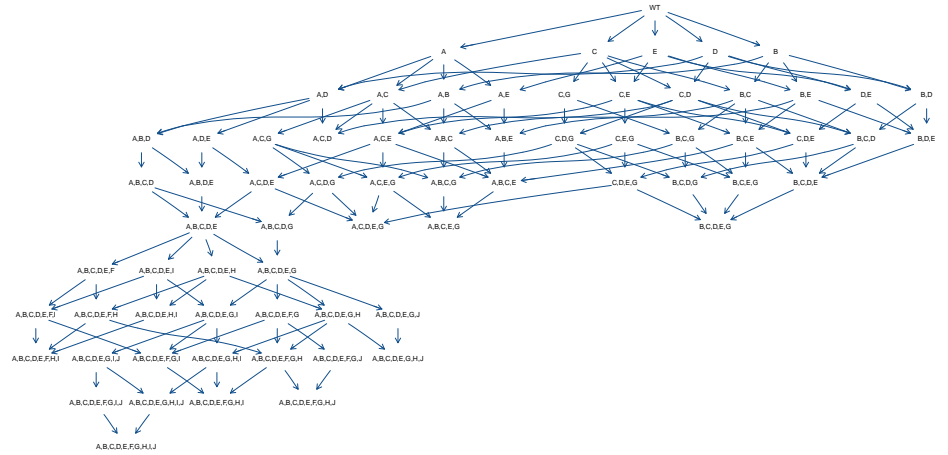

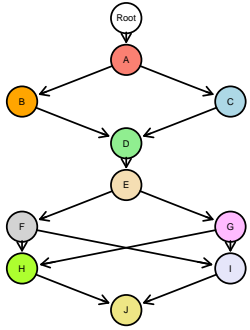

ID [kuiBBxD31RFF9NEj](#)  
 acc genotypes 14  
 peaks no back 2  
 removed edges 1  
 prop rem edges 0.062

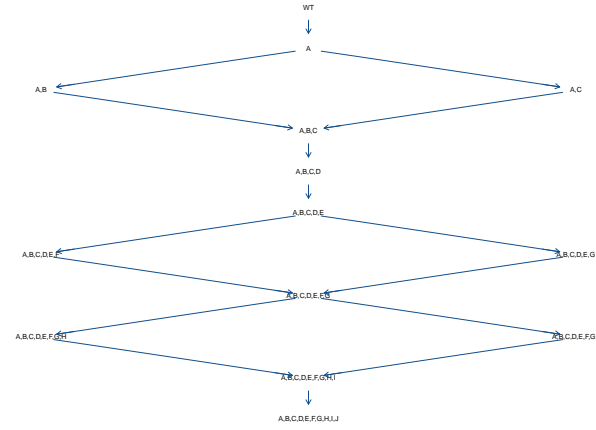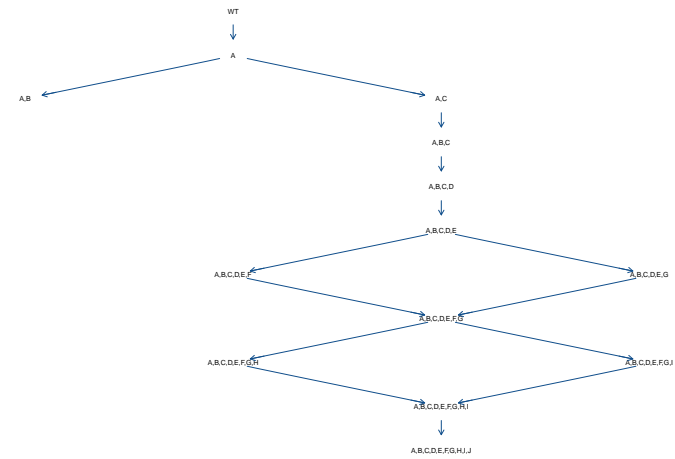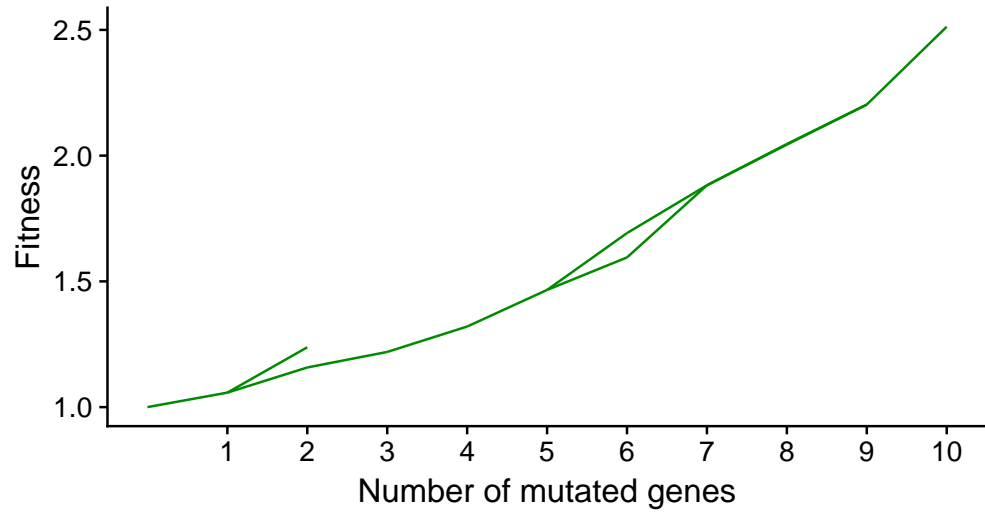

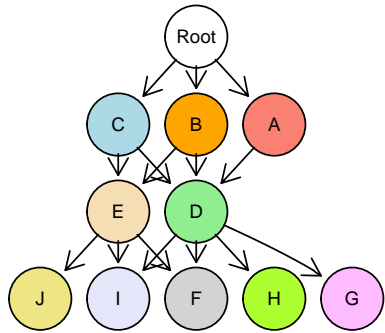

ID kvFyL8XIKXwZvz1L  
 acc genotypes 48  
 peaks no back 9  
 removed edges 30  
 prop rem edges 0.275

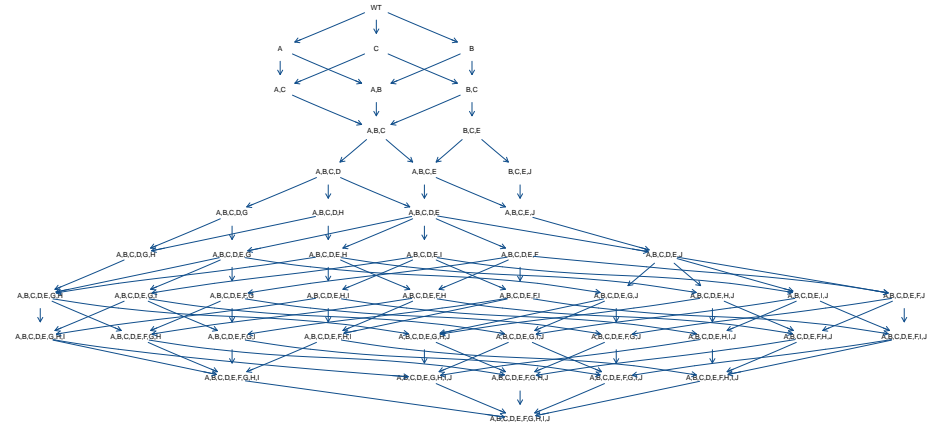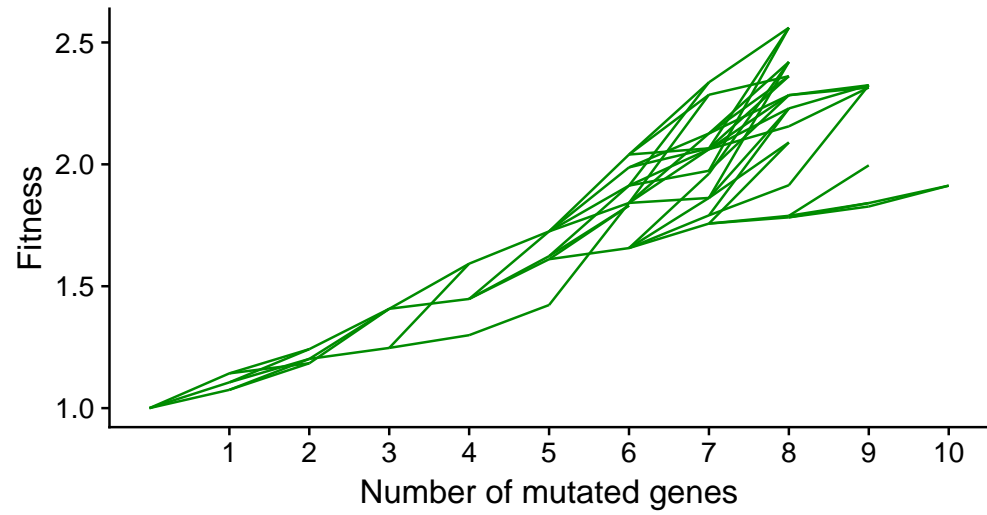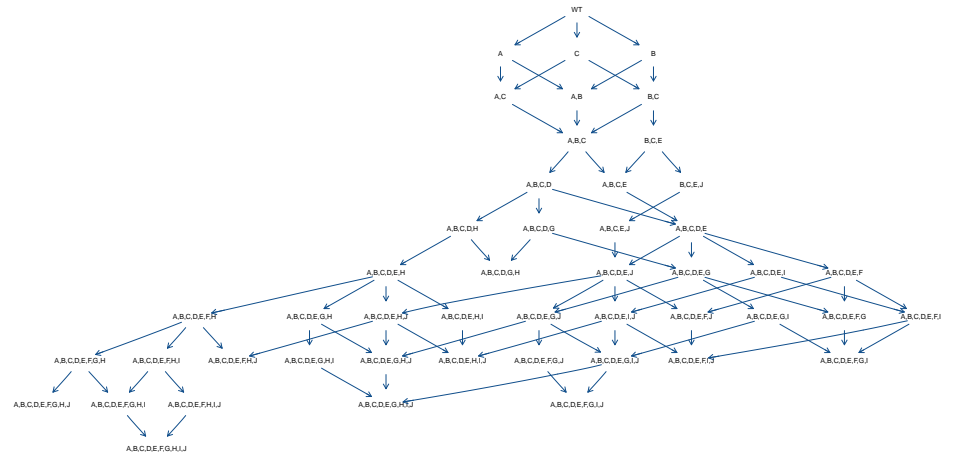



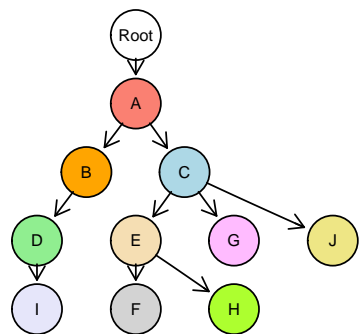

ID **I37sHoyzCWlv8at2**  
 acc genotypes **85**  
 peaks no back **10**  
 removed edges **42**  
 prop rem edges **0.184**

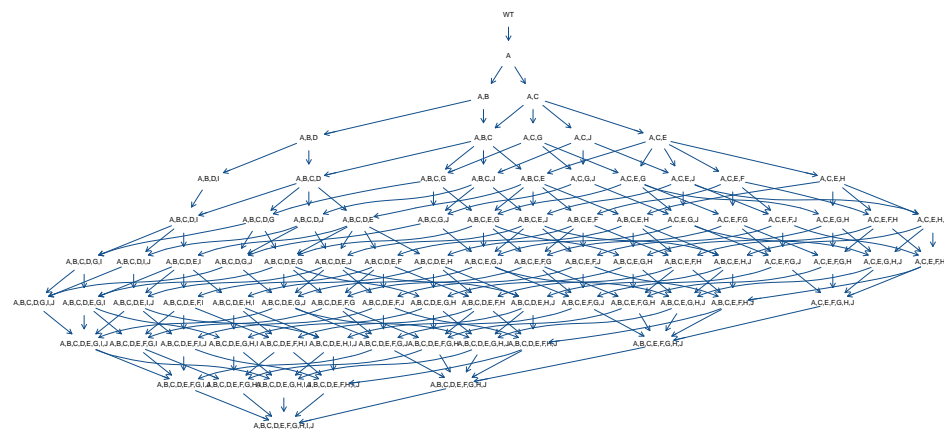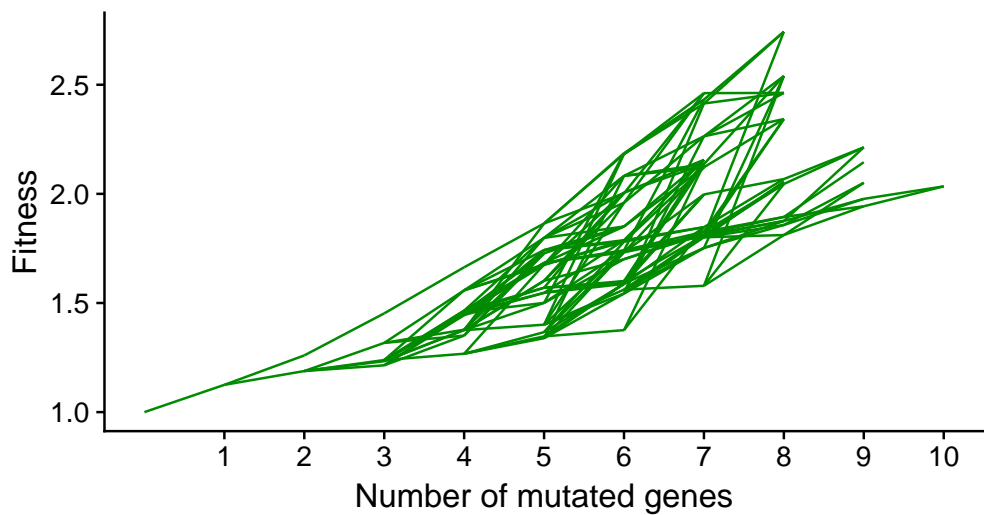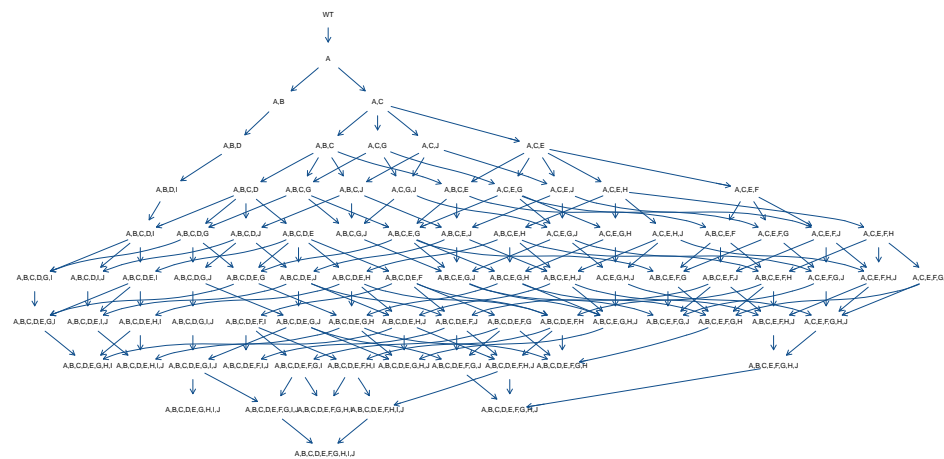

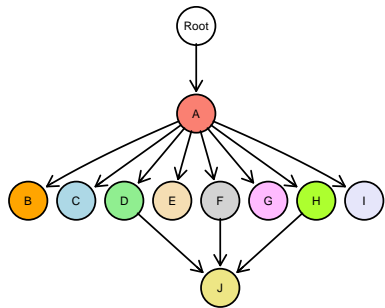

*ID* **lMrqdoPtFXSjeam**  
*acc genotypes* **289**  
*peaks no back* 21  
*removed edges* 252  
*prop rem edges* 0.222

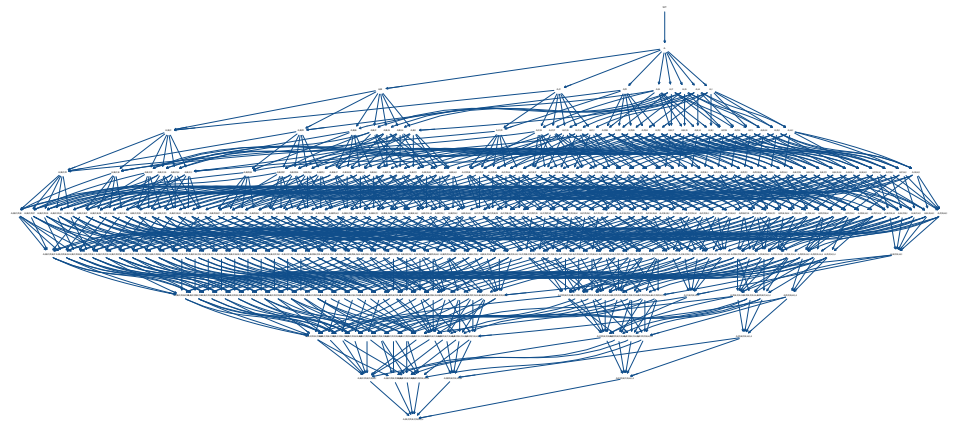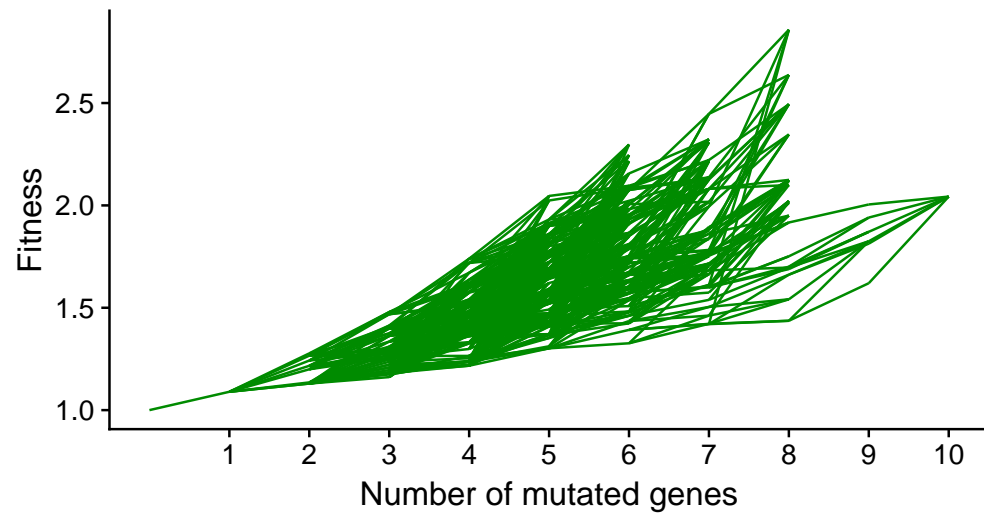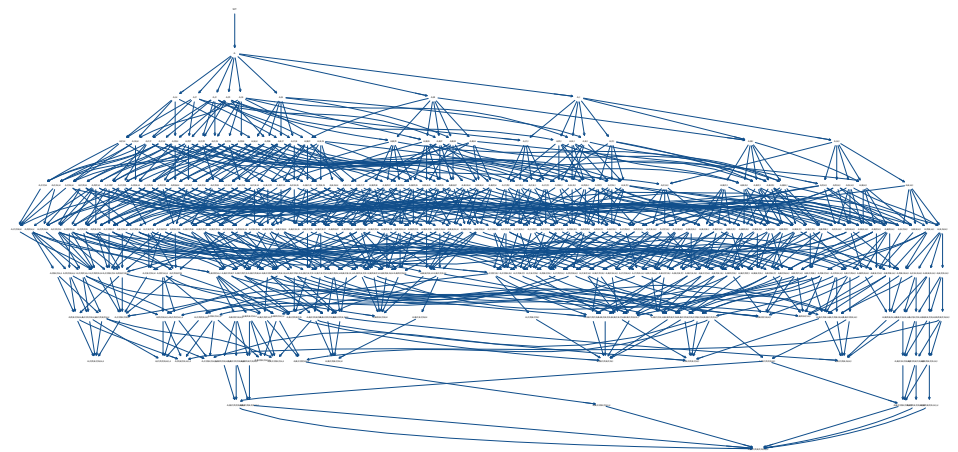

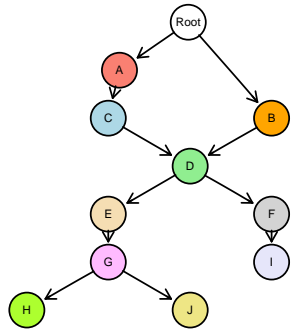

ID LsTIGYZJWFqEXMCQ  
 acc genotypes 24  
 peaks no back 5  
 removed edges 6  
 prop rem edges 0.158

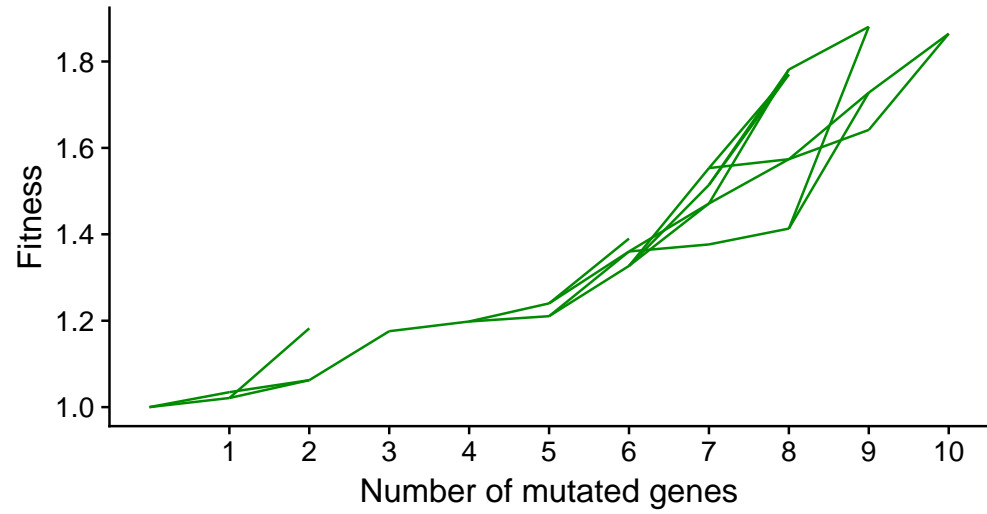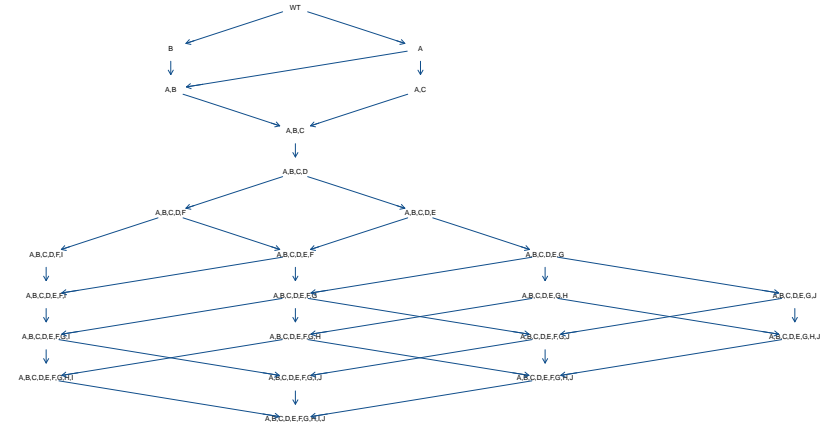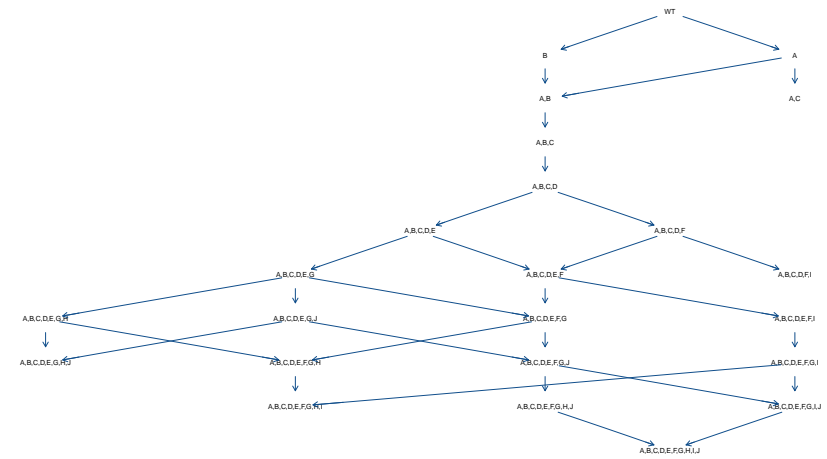

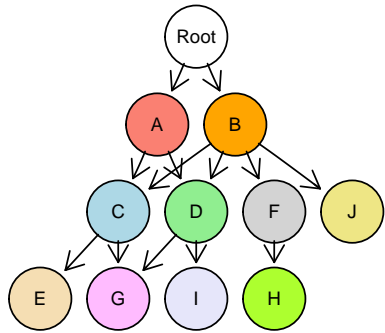

ID LZ8ykaYM2CcUTFrI  
 acc genotypes 86  
 peaks no back 10  
 removed edges 44  
 prop rem edges 0.194

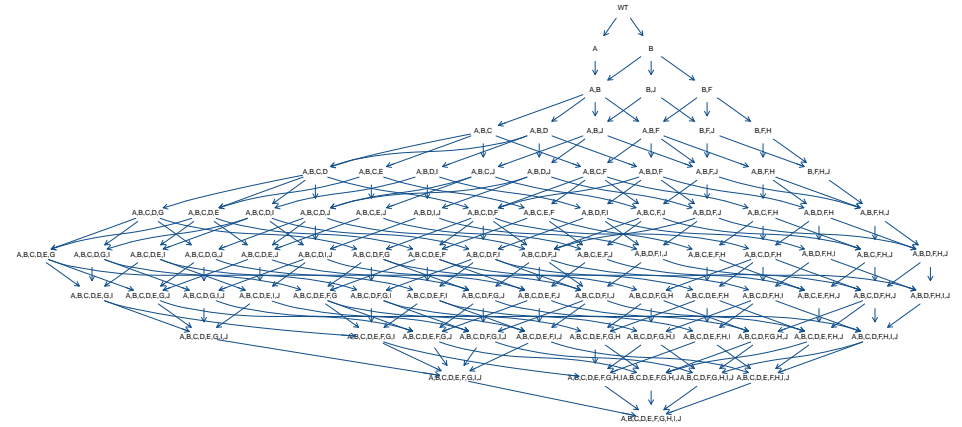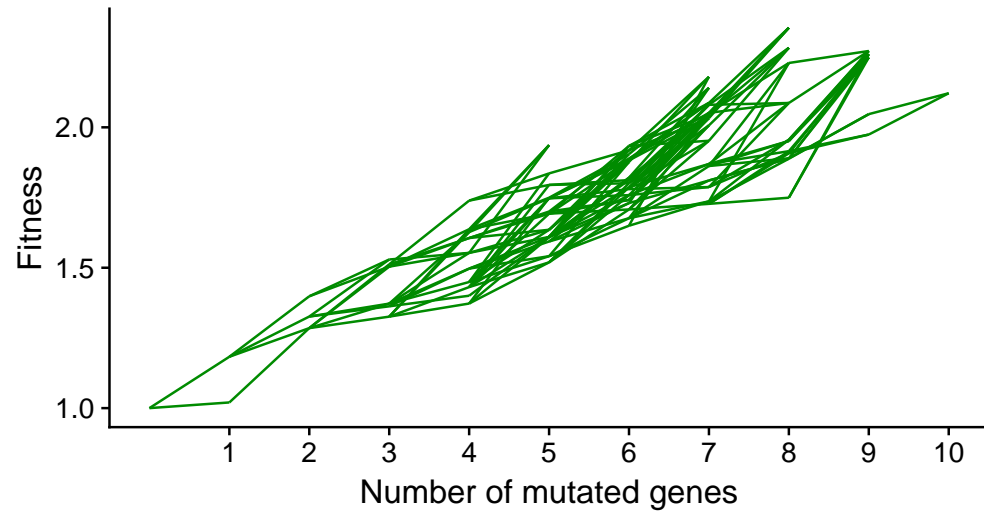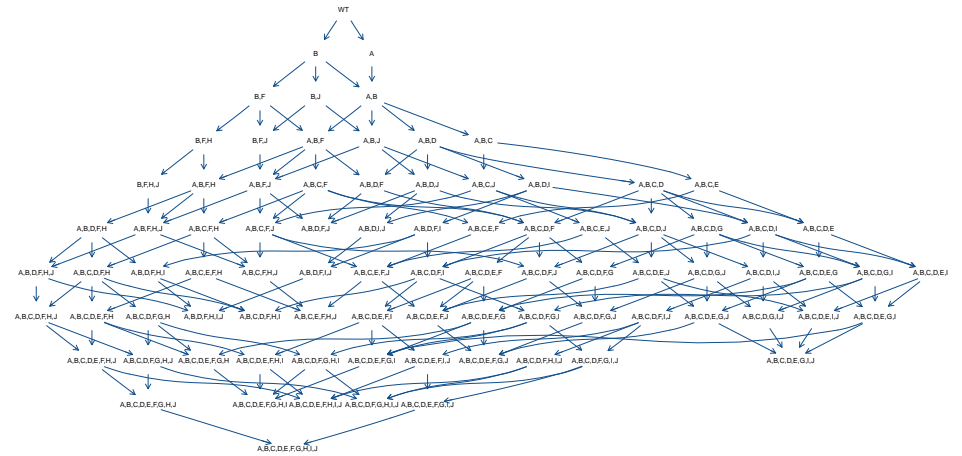

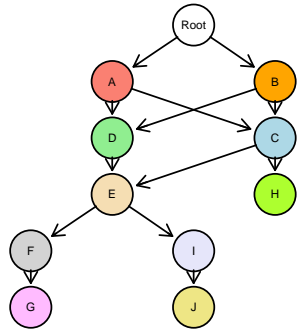

ID **m39LVsPQFf4Car10C**  
 acc genotypes **27**  
 peaks no back **4**  
 removed edges **6**  
 prop rem edges **0.13**

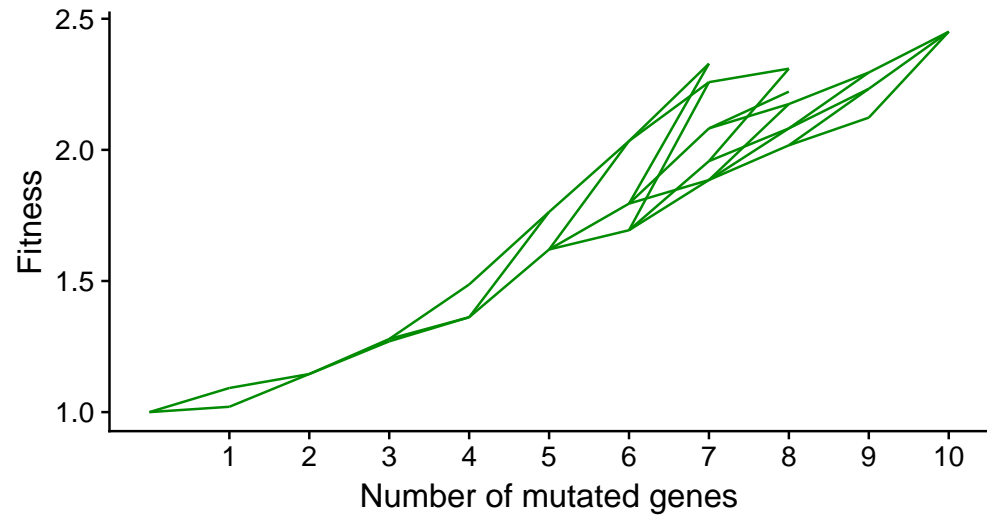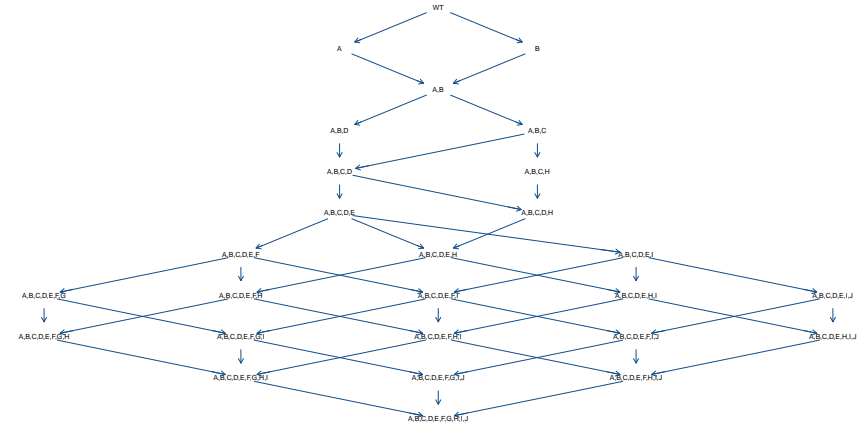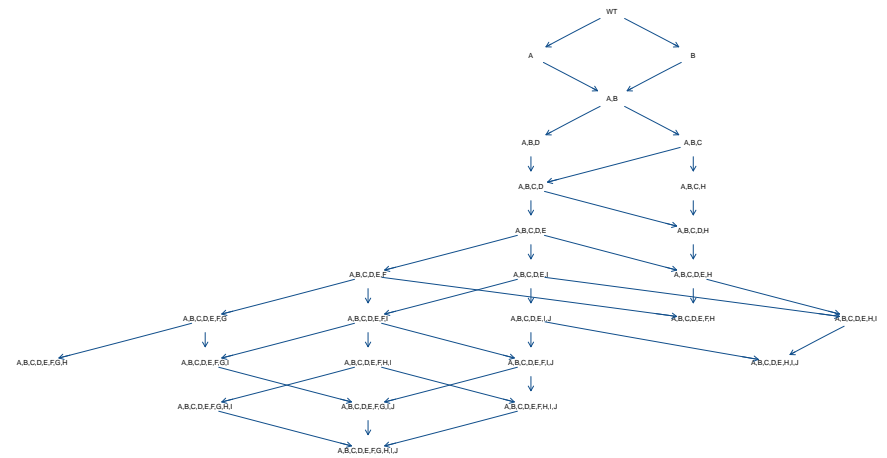

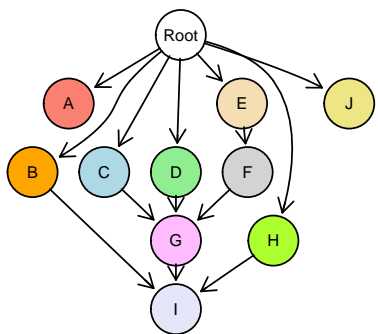

ID M7TqwZkMb4FqjZxL  
 acc genotypes 212  
 peaks no back 18  
 removed edges 178  
 prop rem edges 0.234

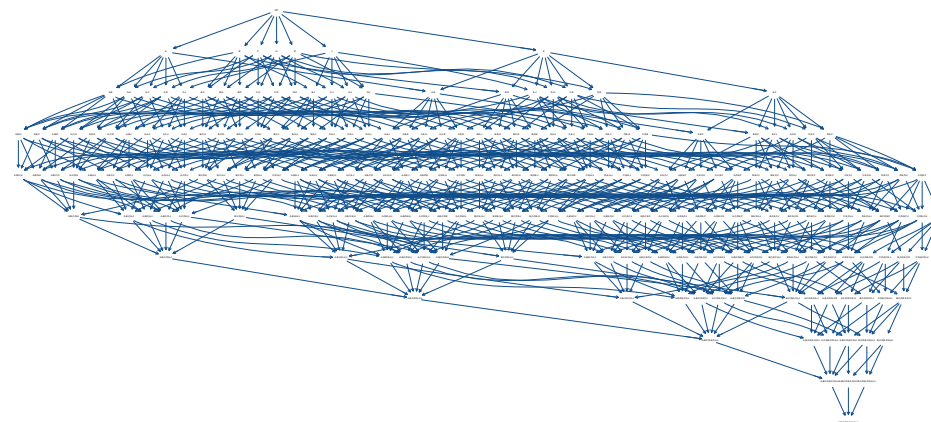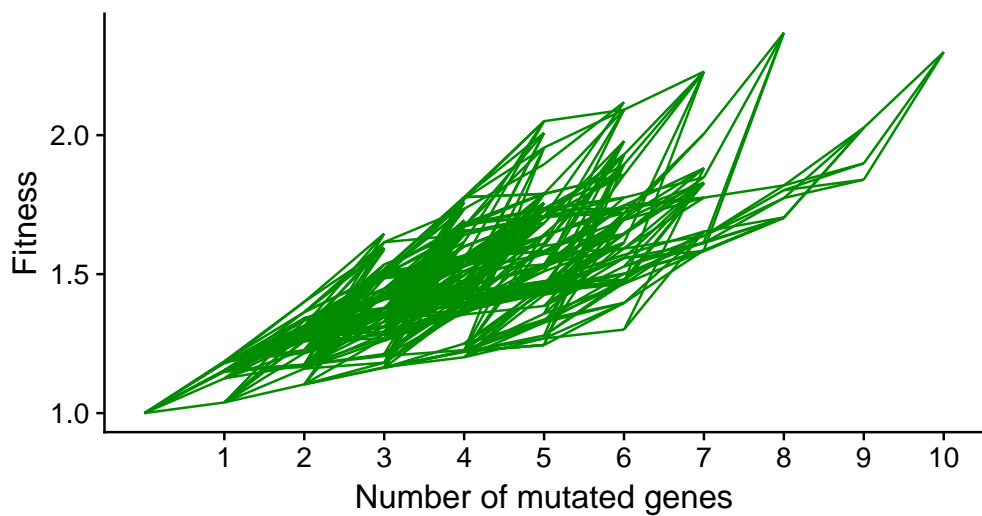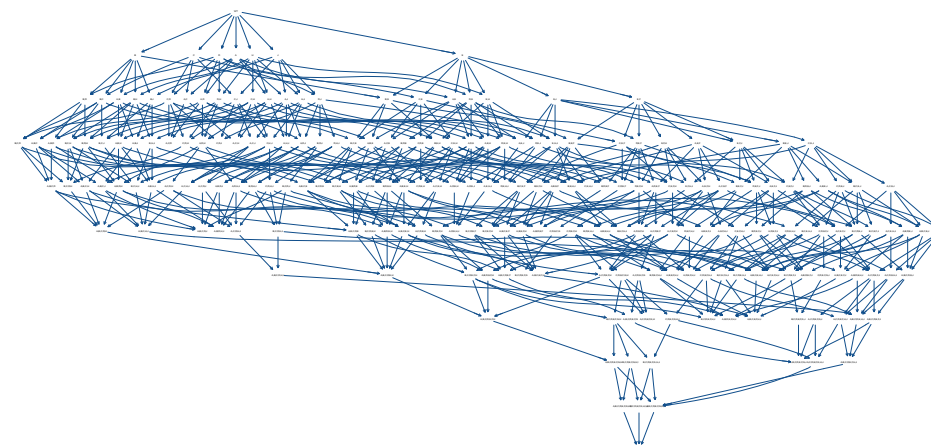

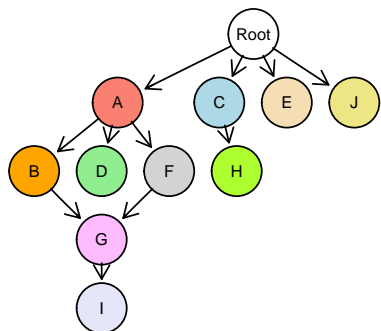

ID MbPTZwyHjCzW5F3T  
 acc genotypes 156  
 peaks no back 12  
 removed edges 87  
 prop rem edges 0.178

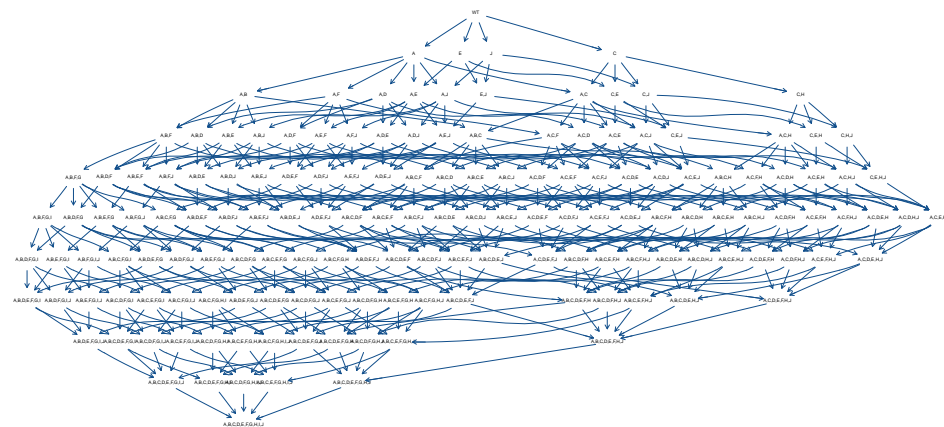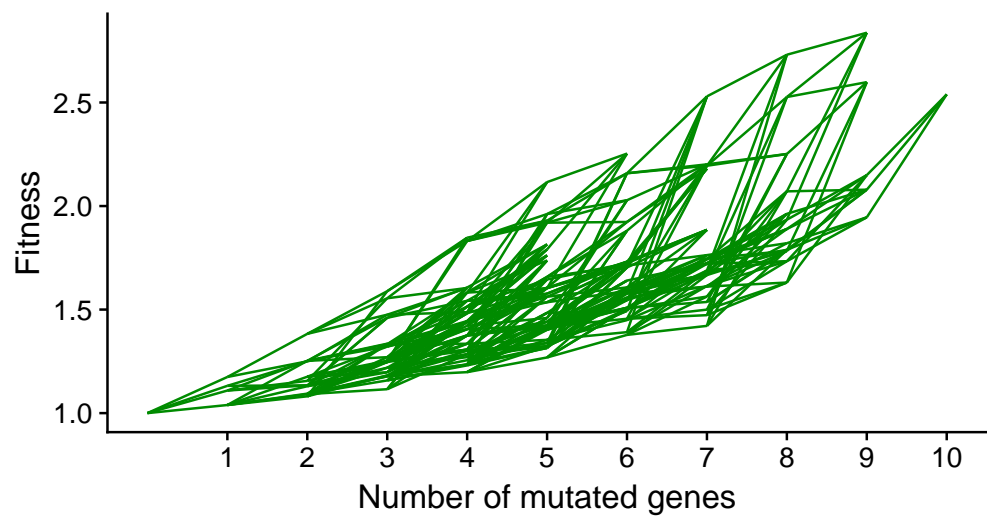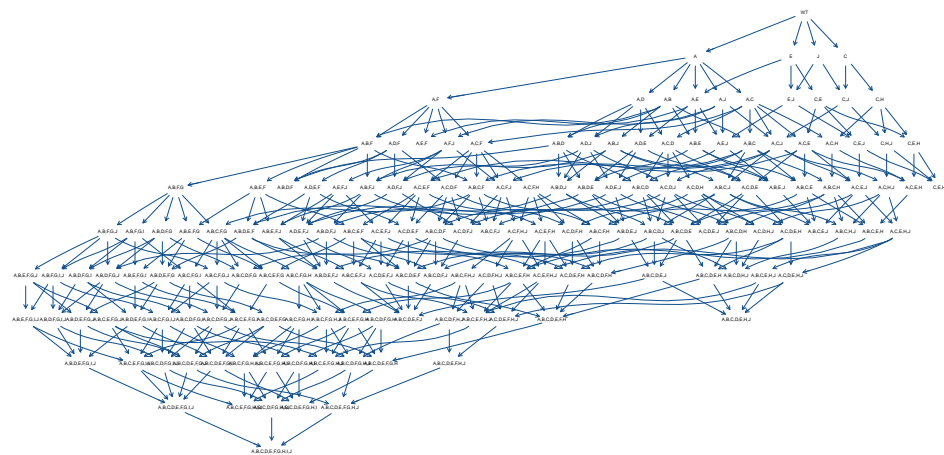

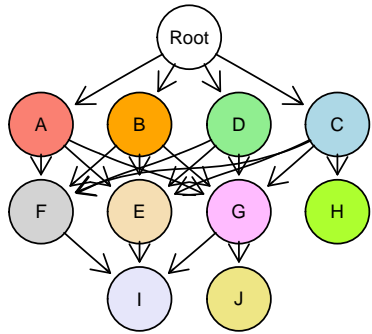

ID **MEBeweDPZbszojRQ**  
 acc genotypes **50**  
 peaks no back **9**  
 removed edges **20**  
 prop rem edges **0.18**

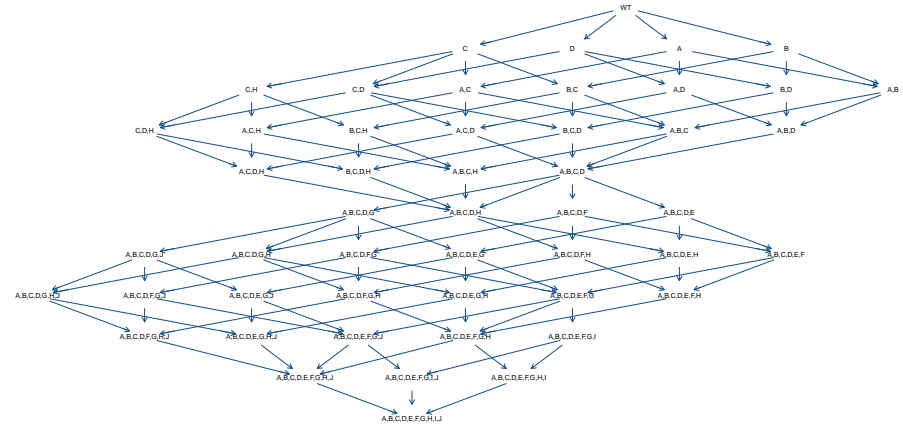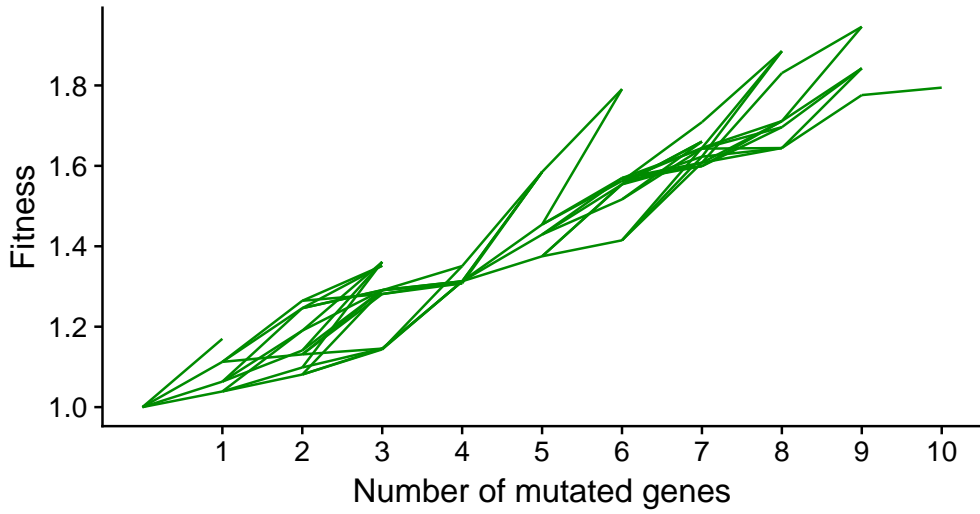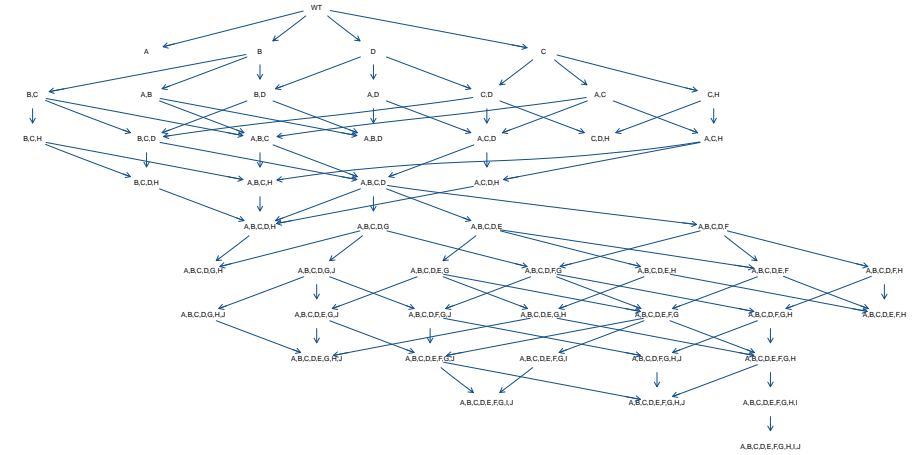



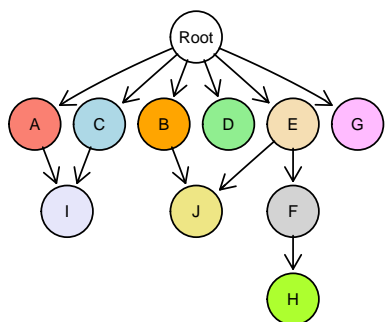

ID MeQOZBLaWrCfm8Ns  
 acc genotypes 220  
 peaks no back 19  
 removed edges 135  
 prop rem edges 0.182

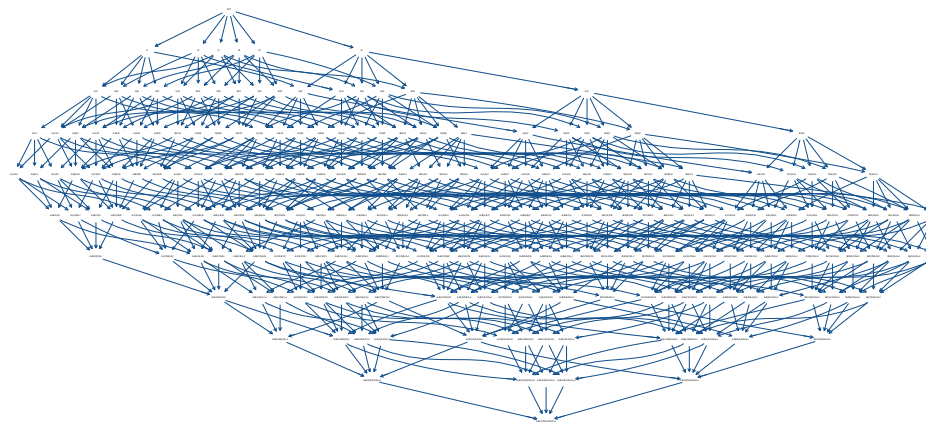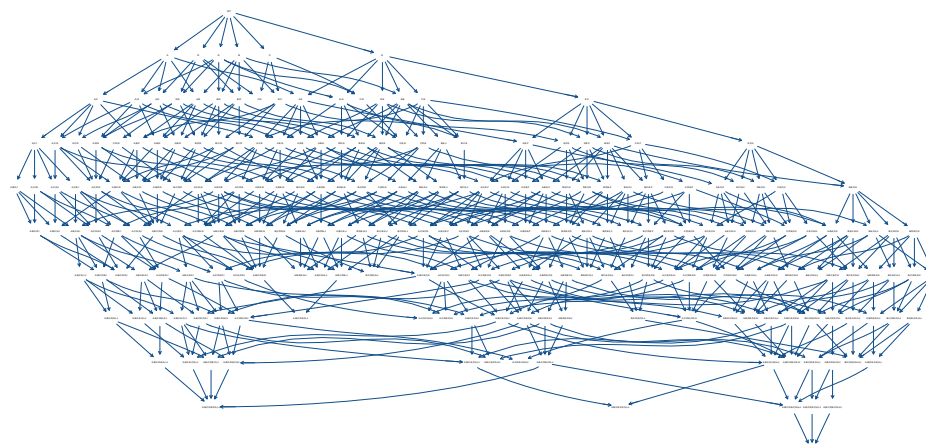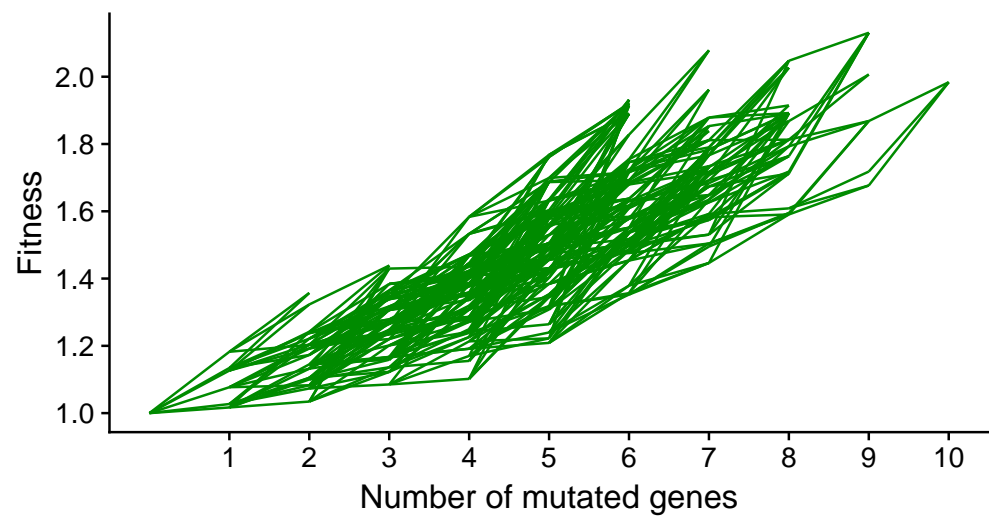

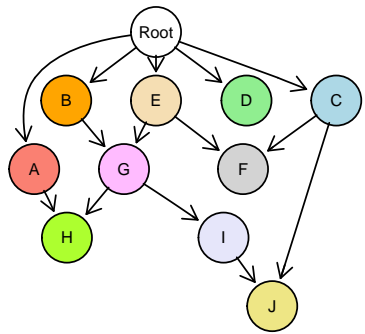

ID **mHOgzGLqndvBGxt**  
 acc genotypes **88**  
 peaks no back 10  
 removed edges 35  
 prop rem edges 0.154

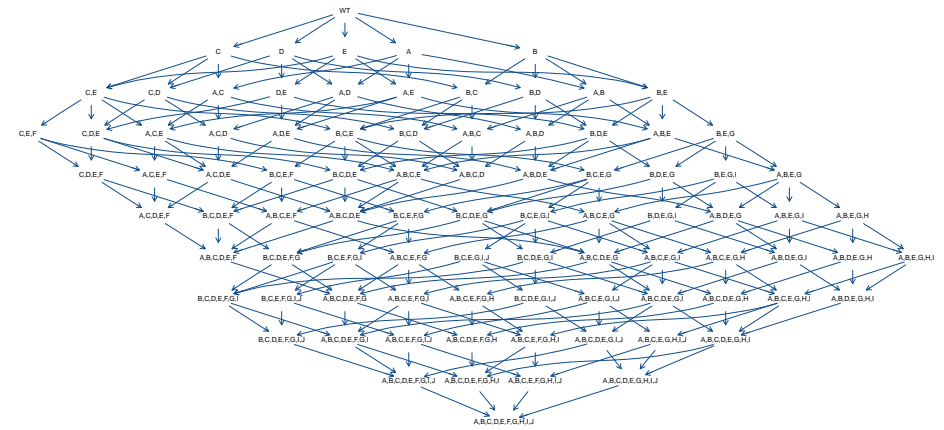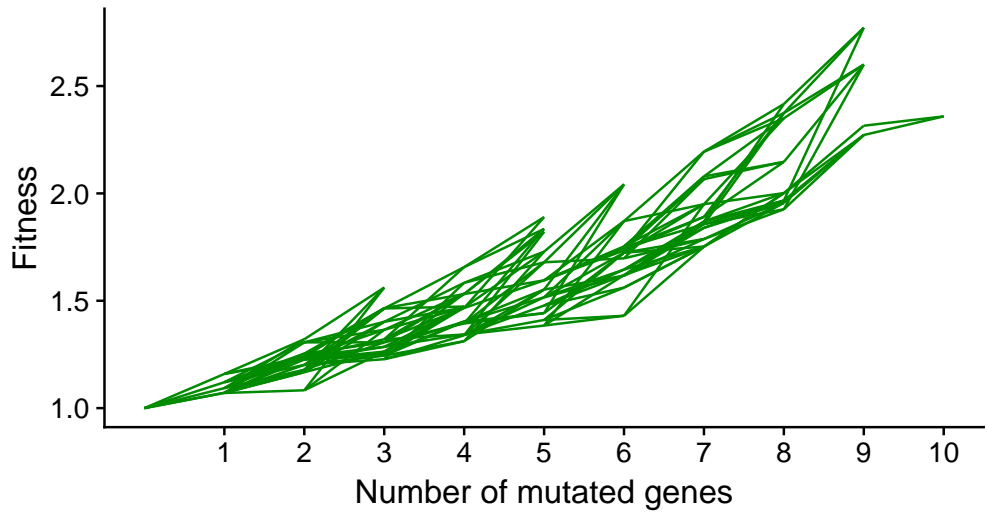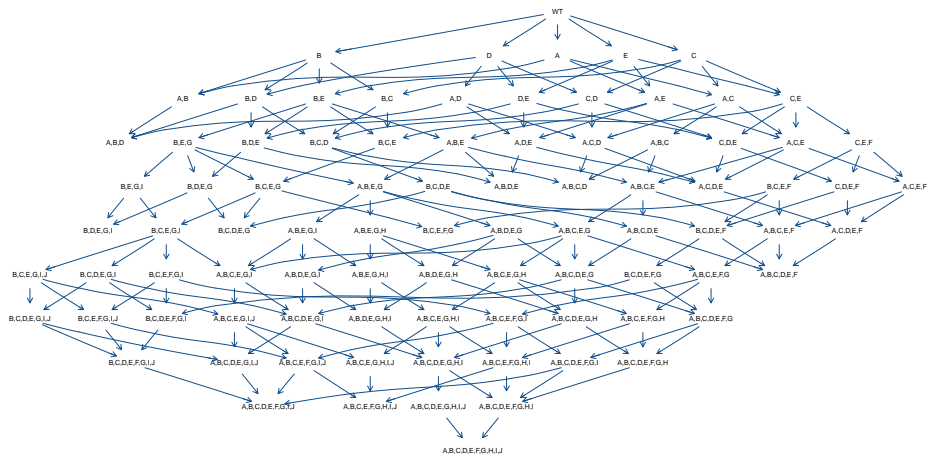

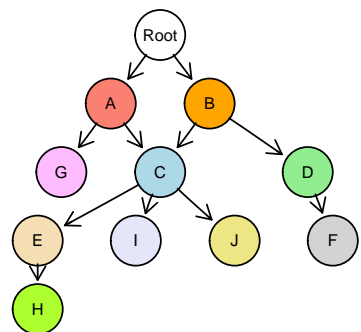

ID **mHXf10tSNigHlcwWO**  
 acc genotypes **84**  
 peaks no back **9**  
 removed edges **44**  
 prop rem edges **0.194**

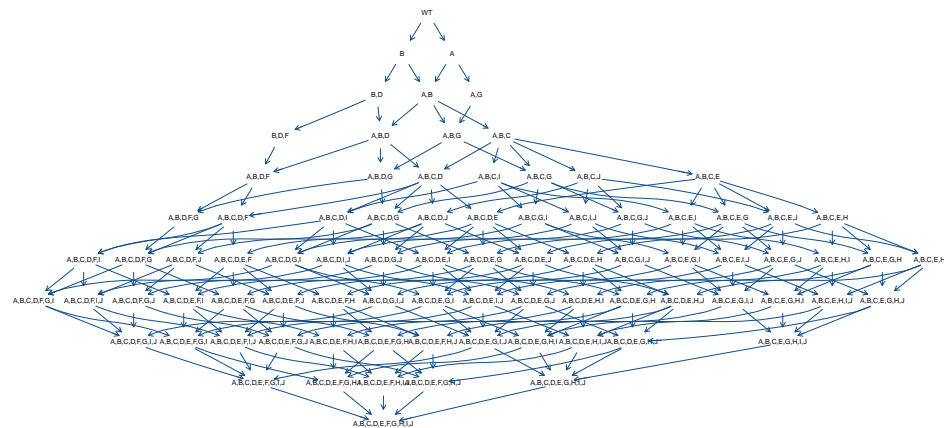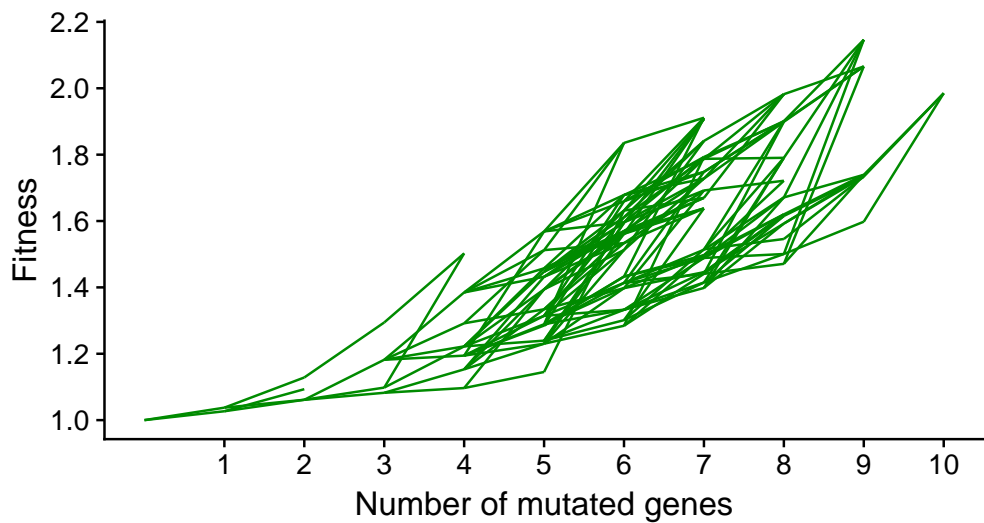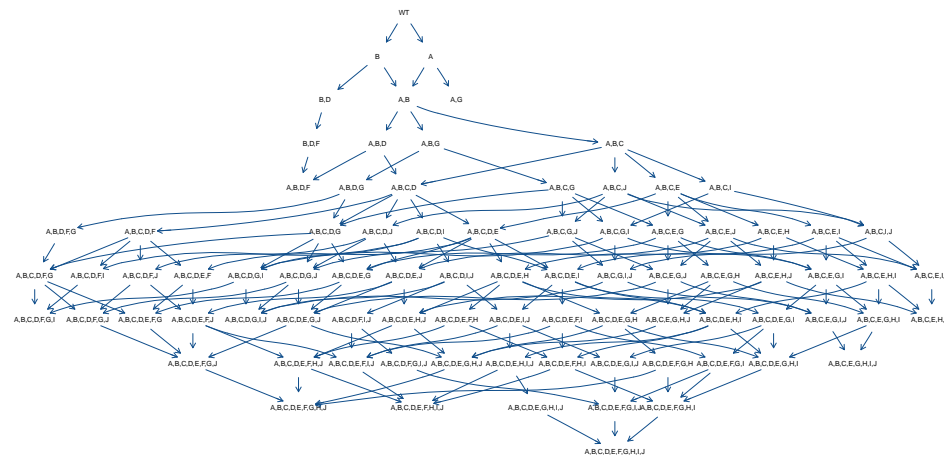

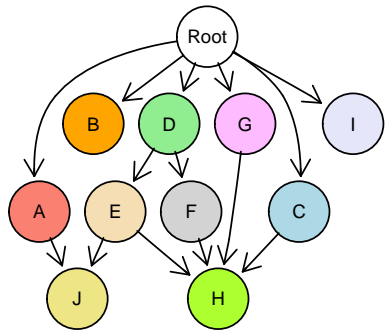

ID MW1p5m710opywel6d  
 acc genotypes 204  
 peaks no back 15  
 removed edges 126  
 prop rem edges 0.179

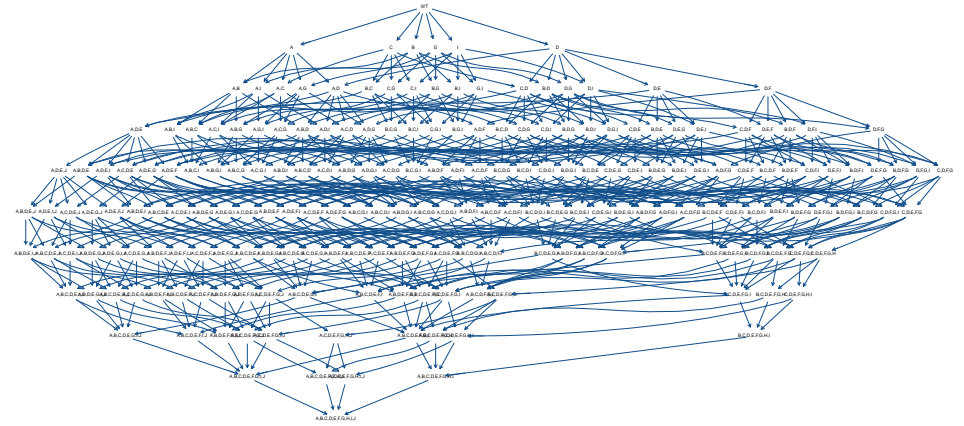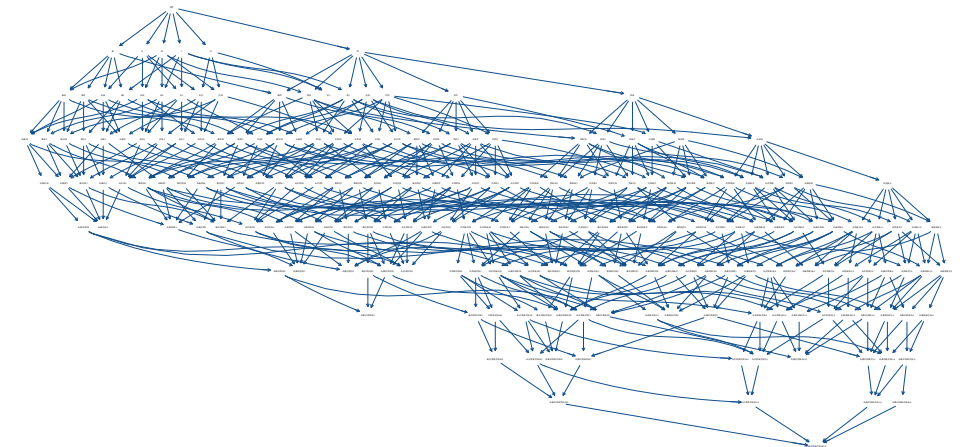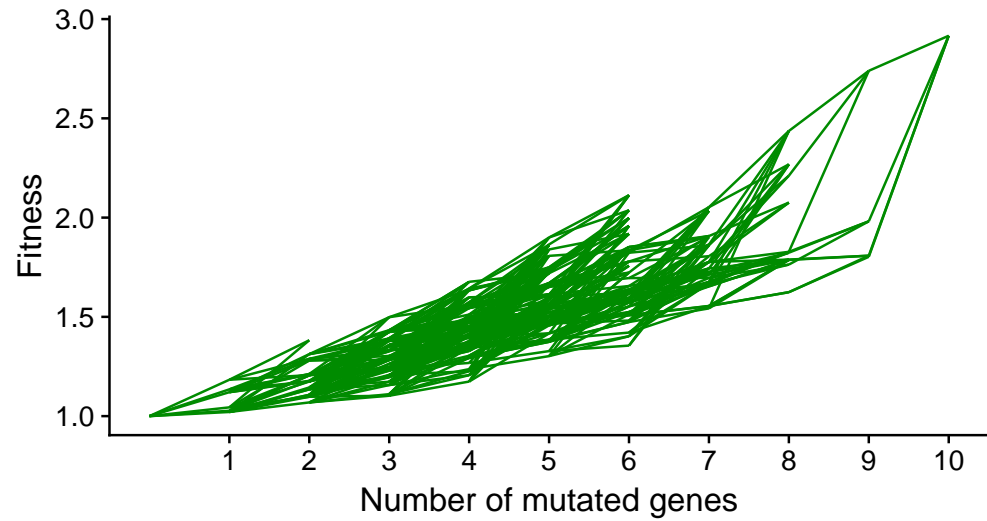

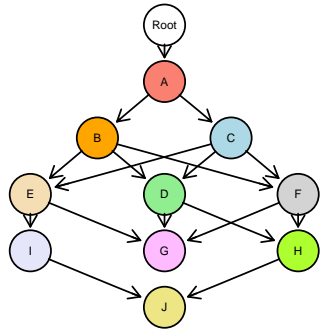

ID N3AGZj5WtBq10w7rq  
 acc genotypes 25  
 peaks no back 5  
 removed edges 6  
 prop rem edges 0.146

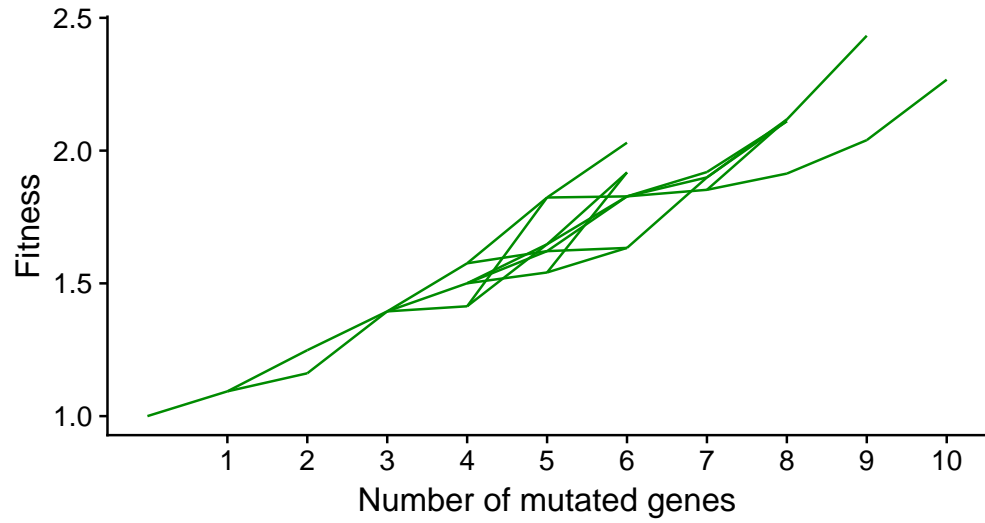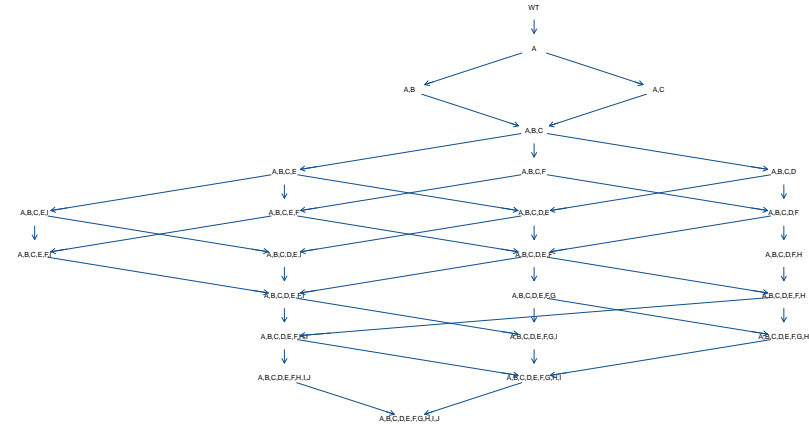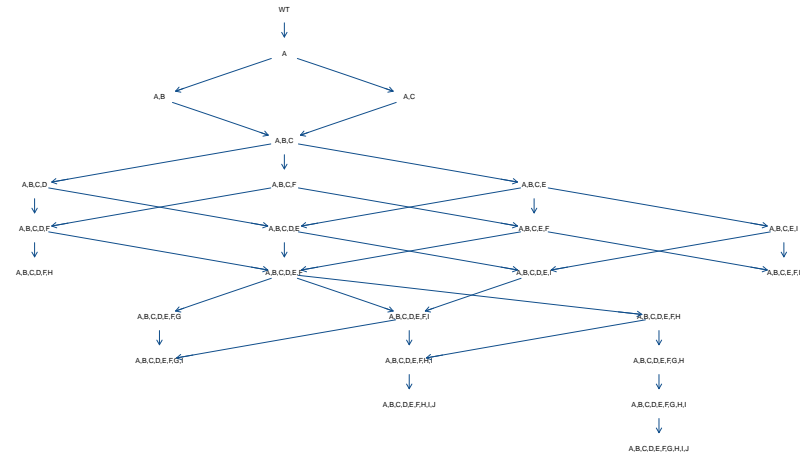

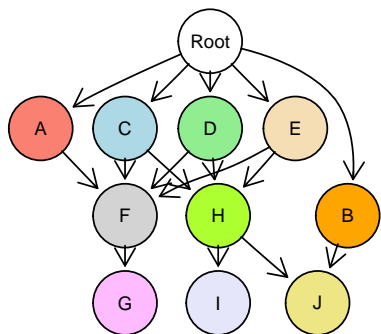

ID n3mpftu4orkSLBLy  
 acc genotypes 60  
 peaks no back 10  
 removed edges 25  
 prop rem edges 0.179

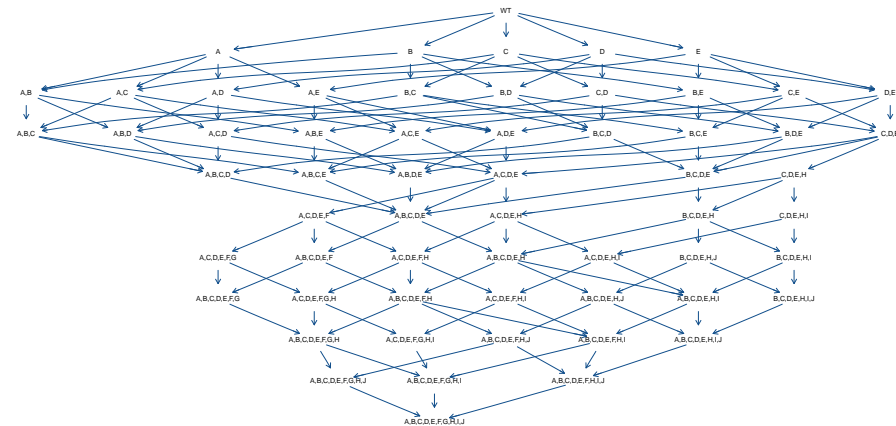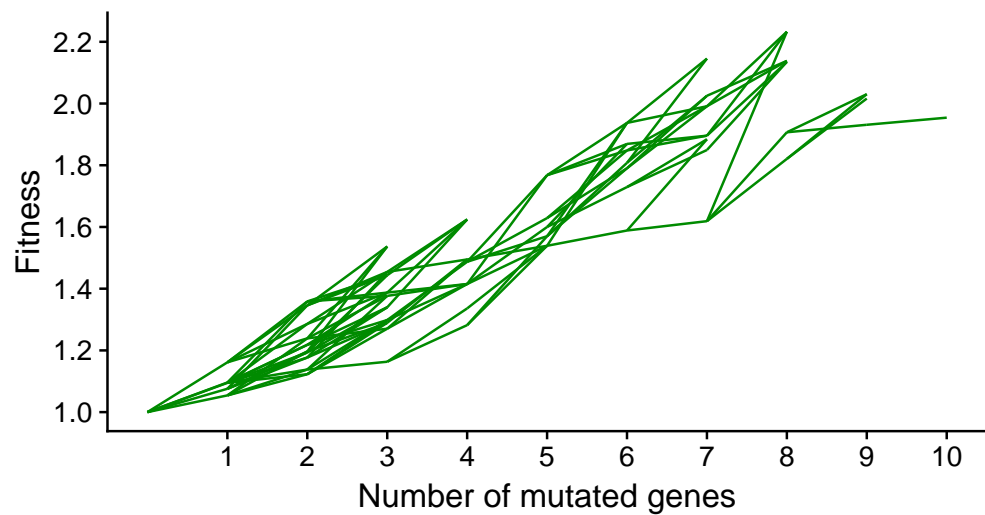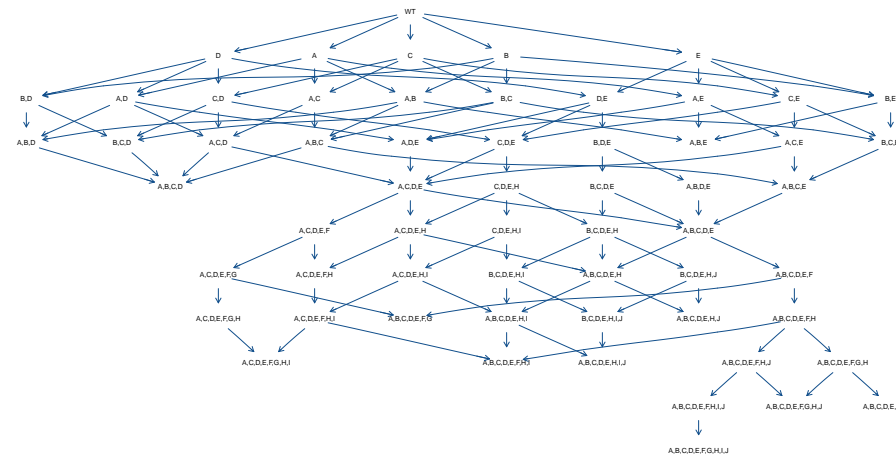

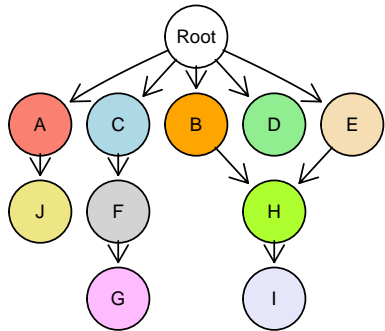

ID **n67tOyWUKcVonUTn**  
 acc genotypes **144**  
 peaks no back **11**  
 removed edges **76**  
 prop rem edges **0.181**

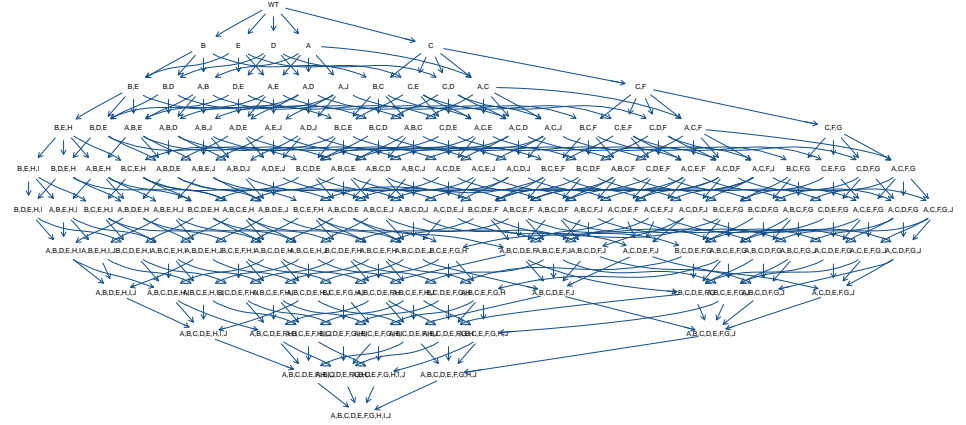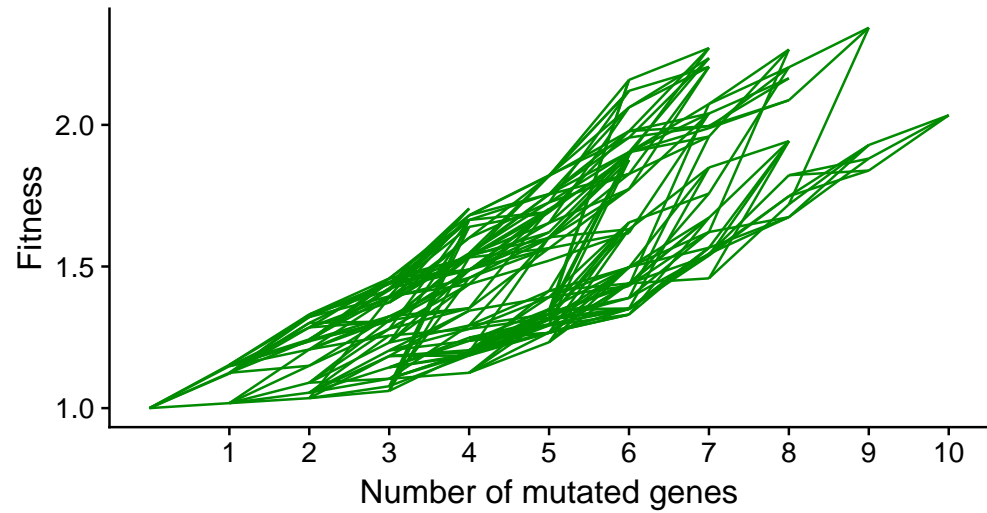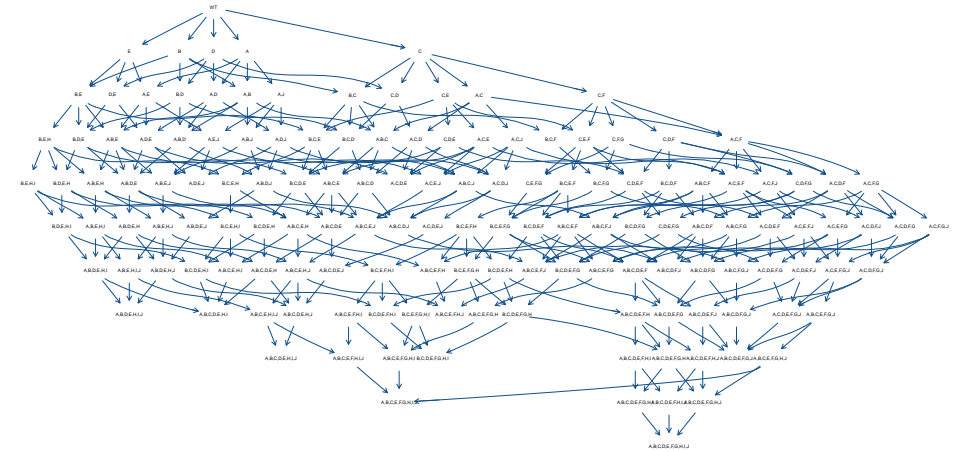

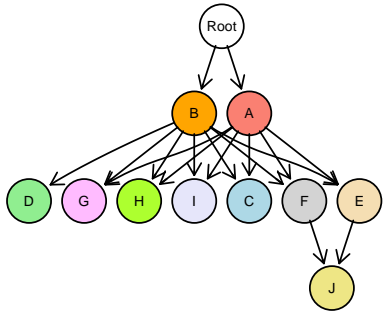

ID n6N43lpBlanX2OCS  
 acc genotypes 164  
 peaks no back 15  
 removed edges 95  
 prop rem edges 0.168

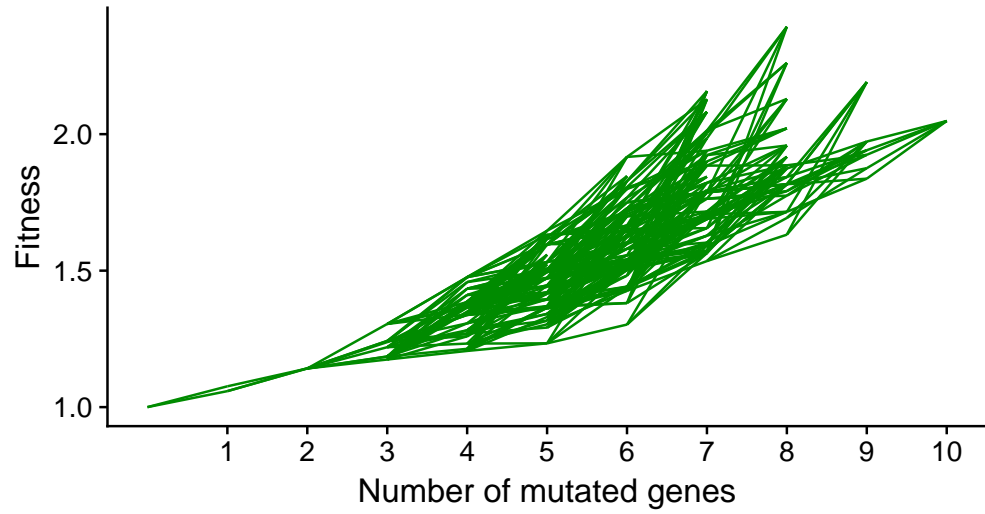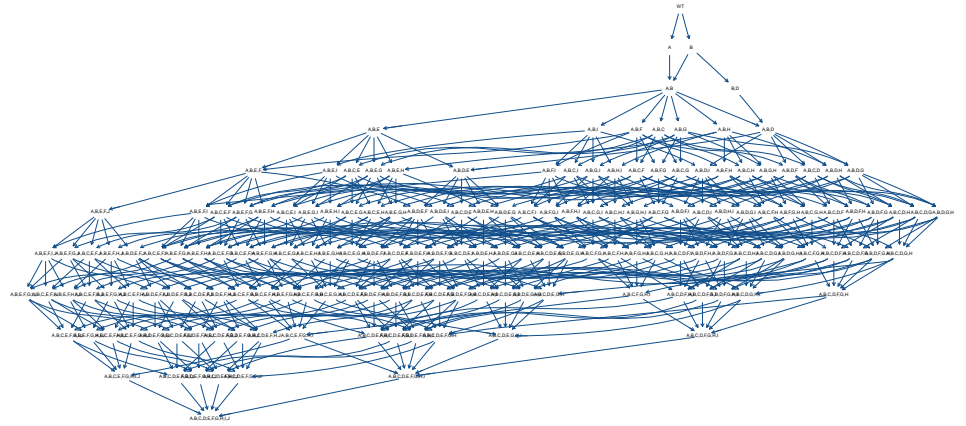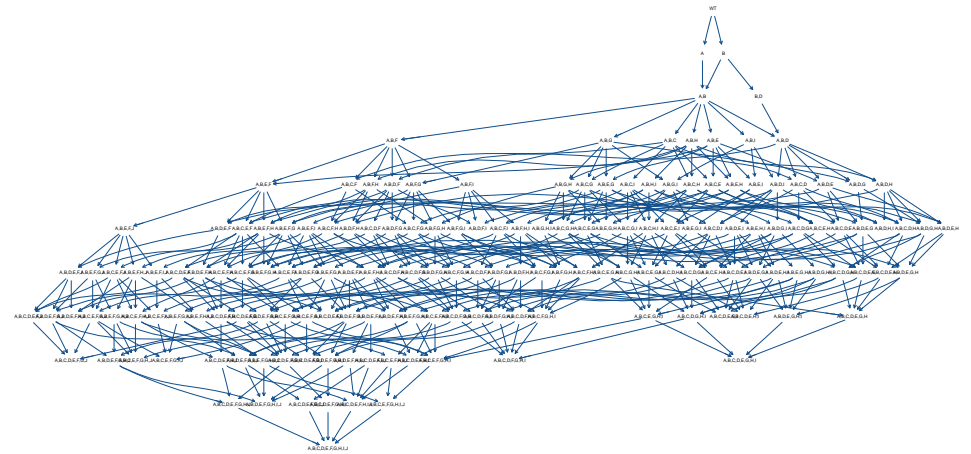



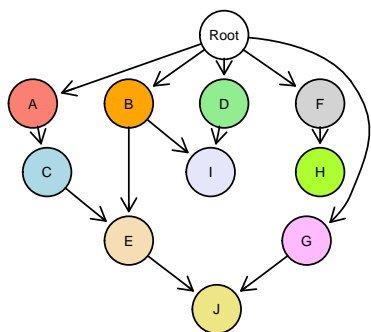

ID **NHvOV5oluQLza23**  
*acc genotypes* **117**  
*peaks no back* 11  
*removed edges* 59  
*prop rem edges* 0.18

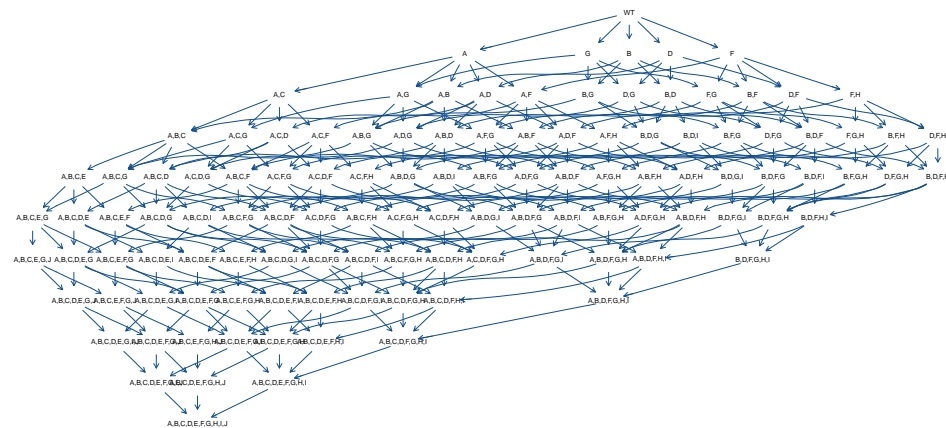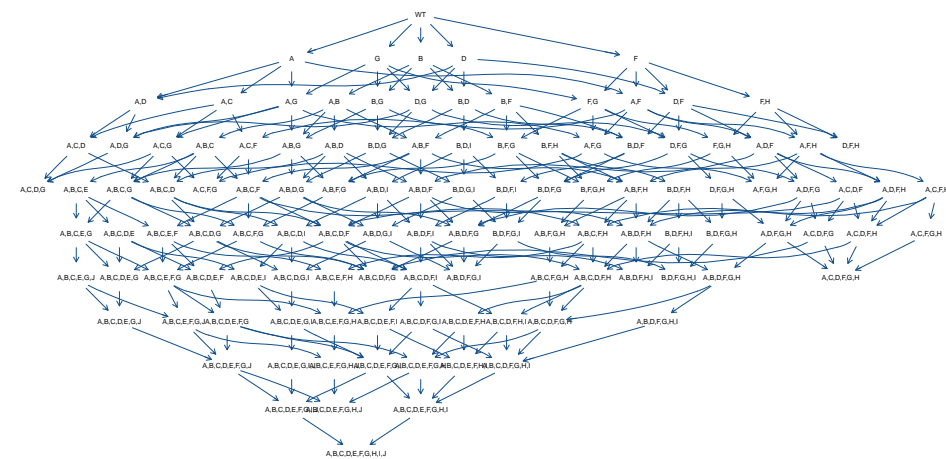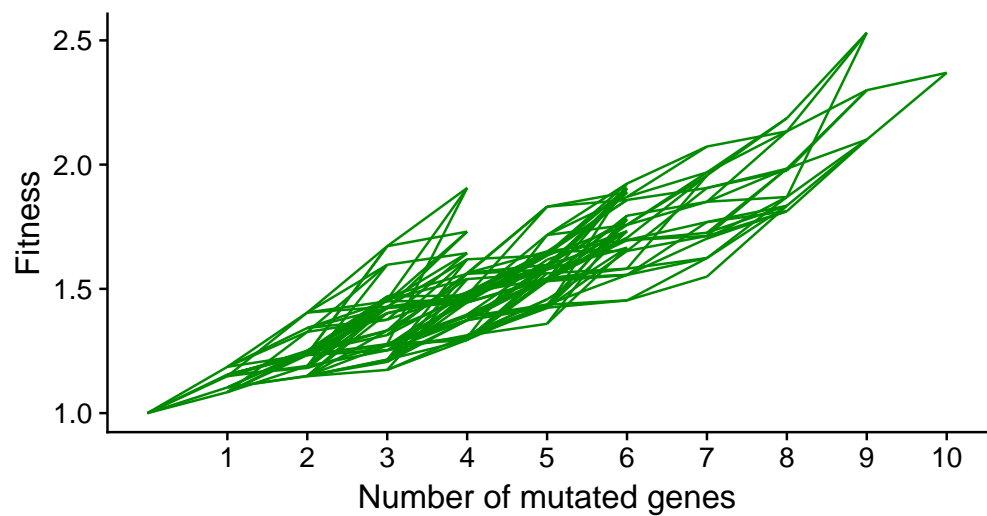

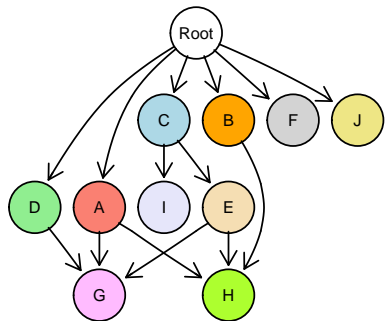

ID **nLayuUMxBrwliw43**  
 acc genotypes **200**  
 peaks no back **17**  
 removed edges **135**  
 prop rem edges **0.197**

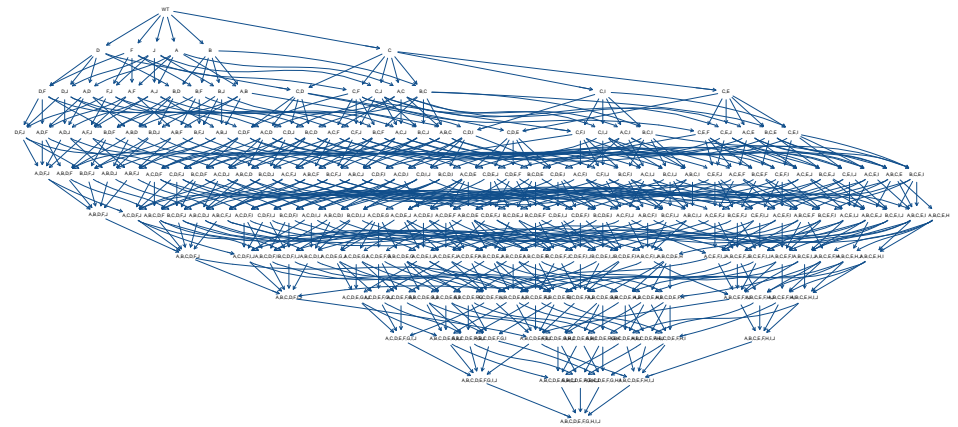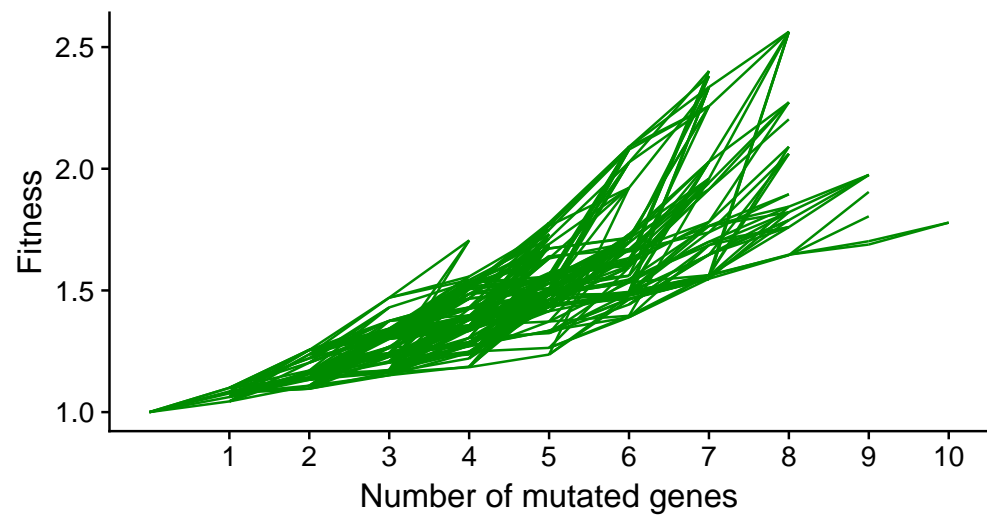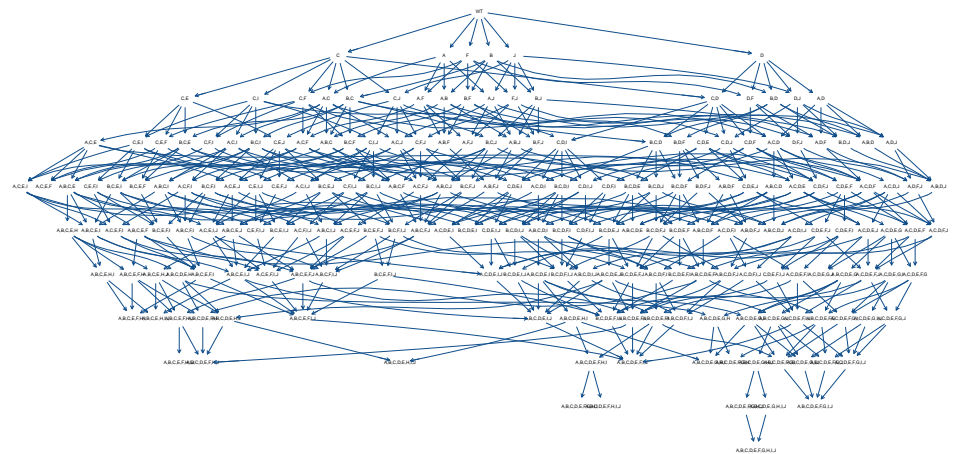

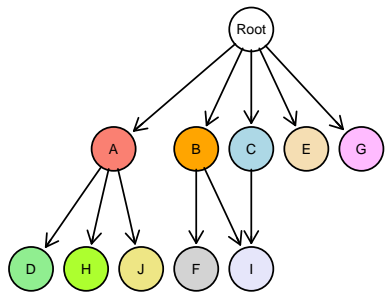

ID nOAHFfiZ4dc4UPV  
 acc genotypes 288  
 peaks no back 24  
 removed edges 255  
 prop rem edges 0.24

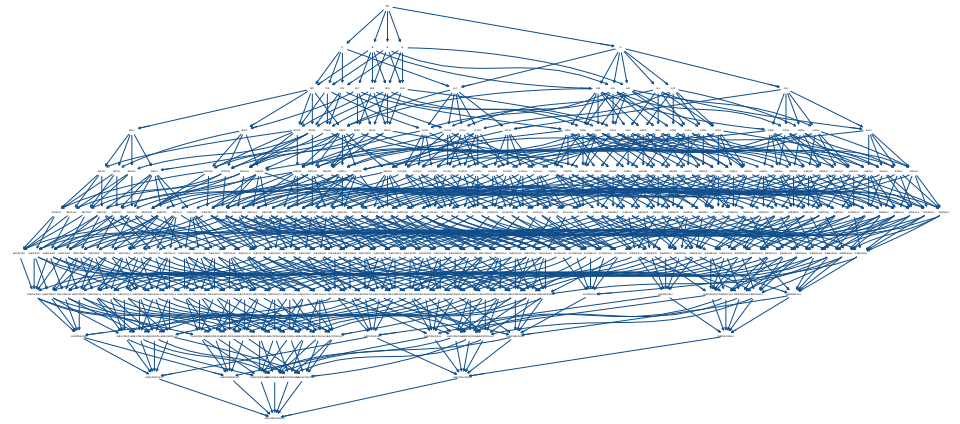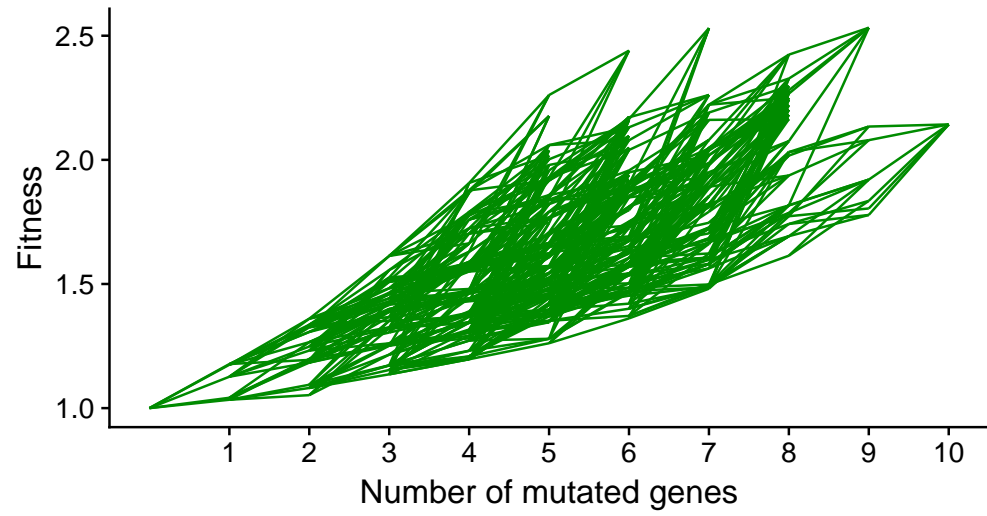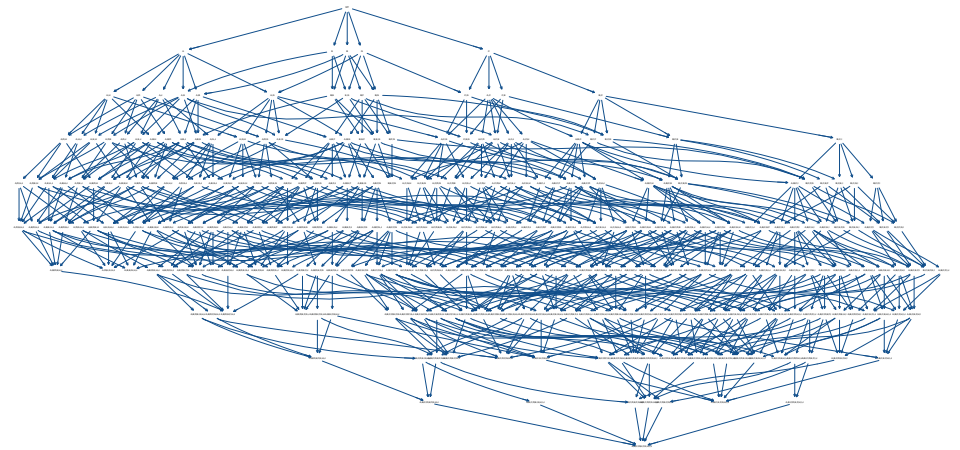

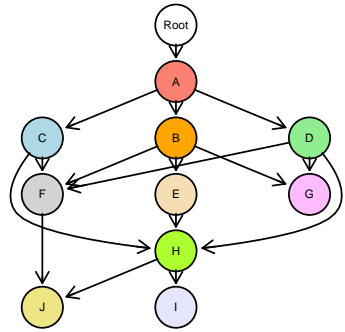

ID **noHAVtQI4KdH8hEq**  
 acc genotypes **33**  
 peaks no back **5**  
 removed edges **12**  
 prop rem edges **0.197**

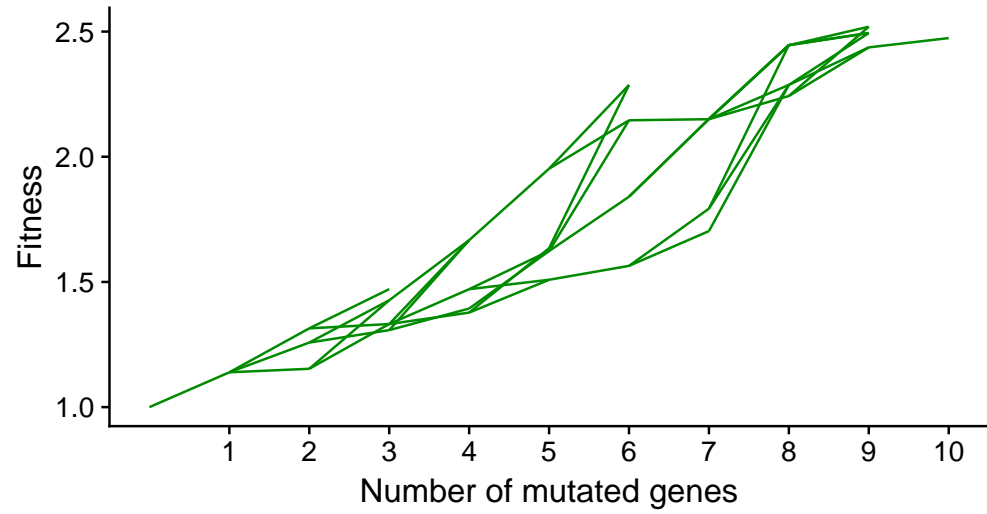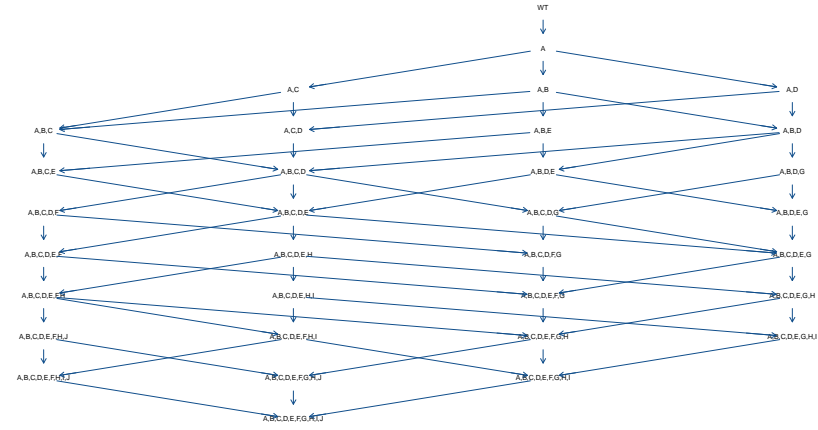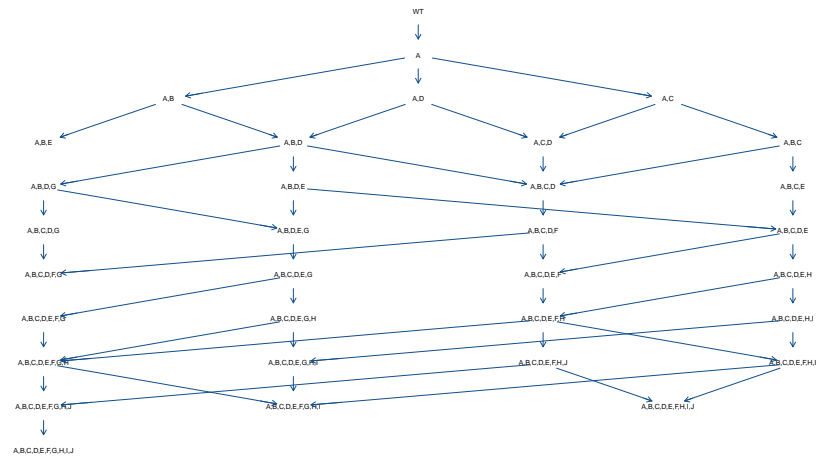

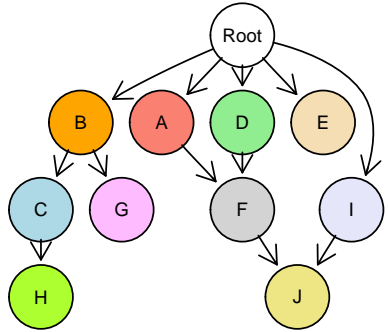

ID **NSqT8kGDJ9IU108hE**  
 acc genotypes **154**  
 peaks no back **11**  
 removed edges **75**  
 prop rem edges **0.157**

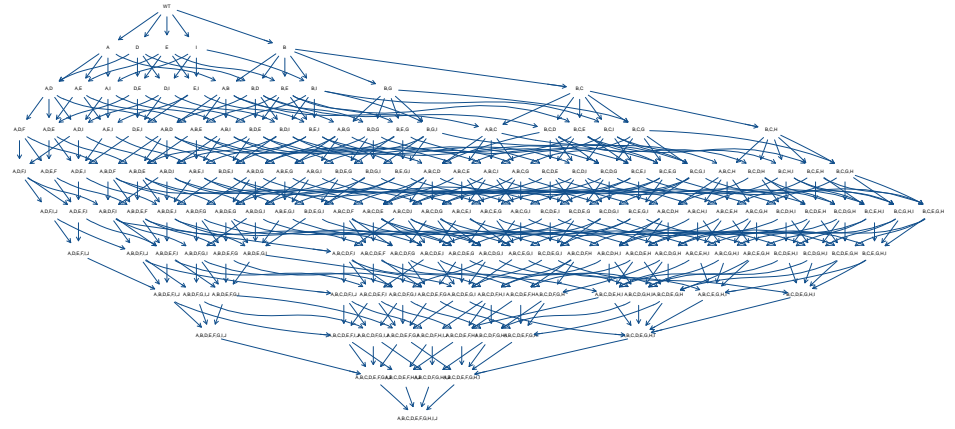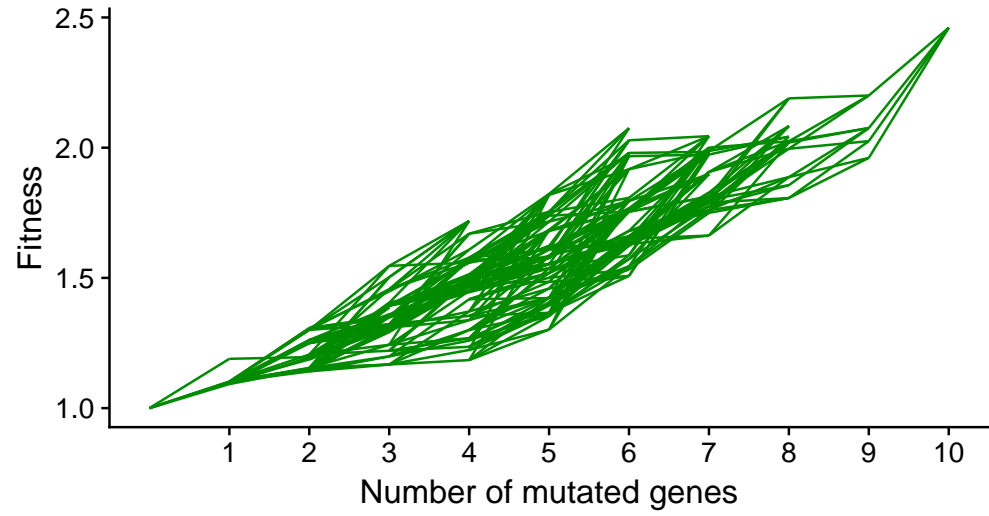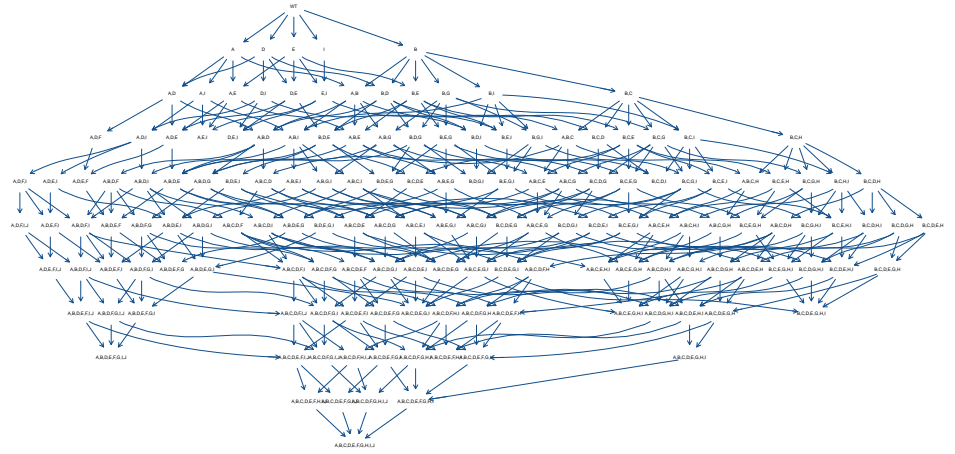

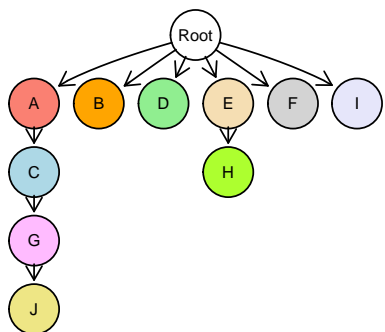

ID nTjCF9qeG8JYDoN8  
 acc genotypes 240  
 peaks no back 19  
 removed edges 158  
 prop rem edges 0.19

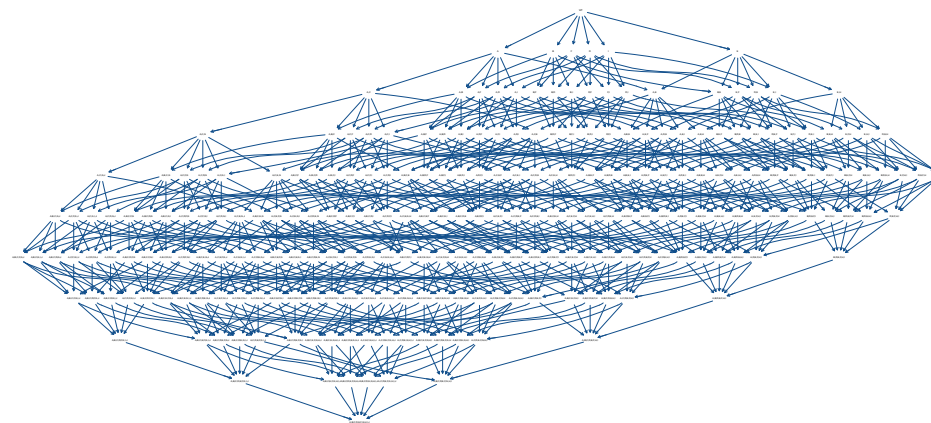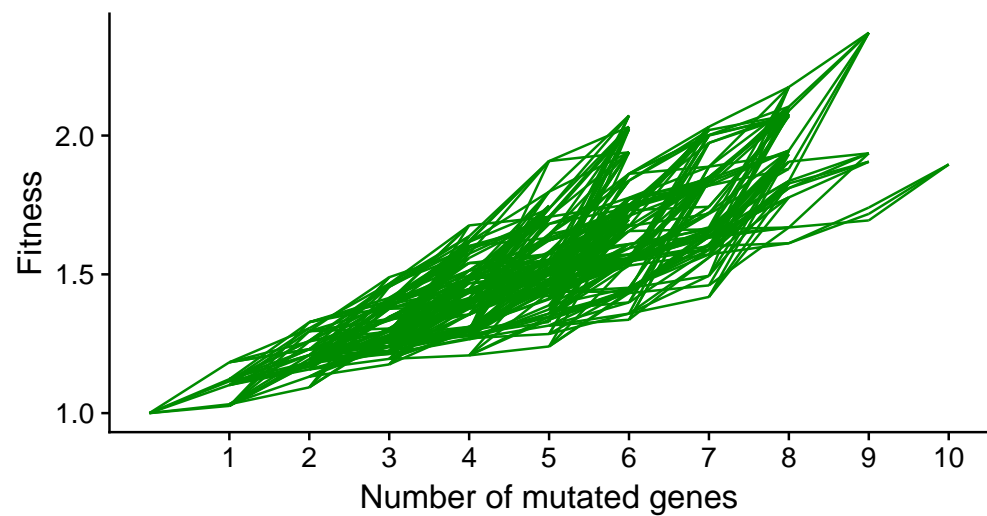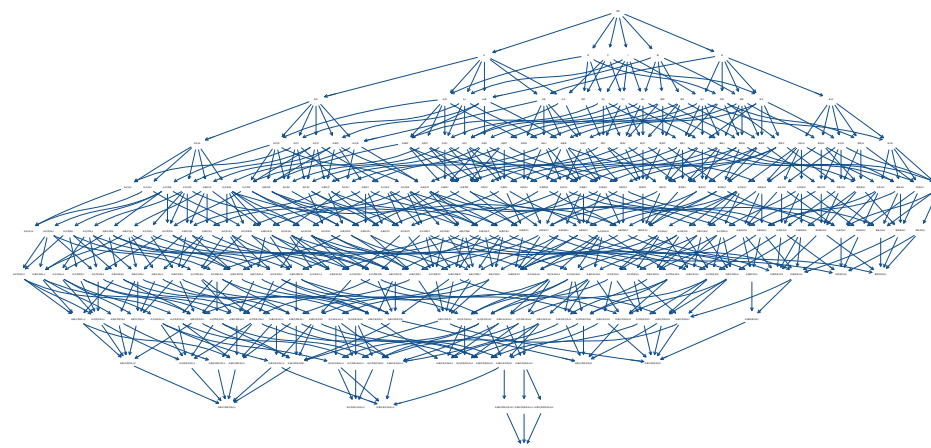

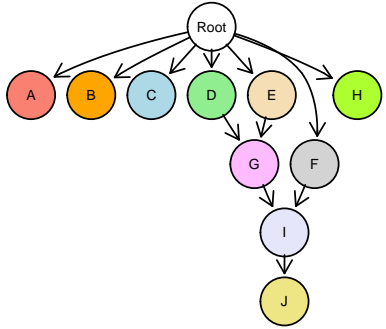

ID **nVi510c5OJbnQRcl5**  
 acc genotypes **192**  
 peaks no back **17**  
 removed edges **126**  
 prop rem edges **0.192**

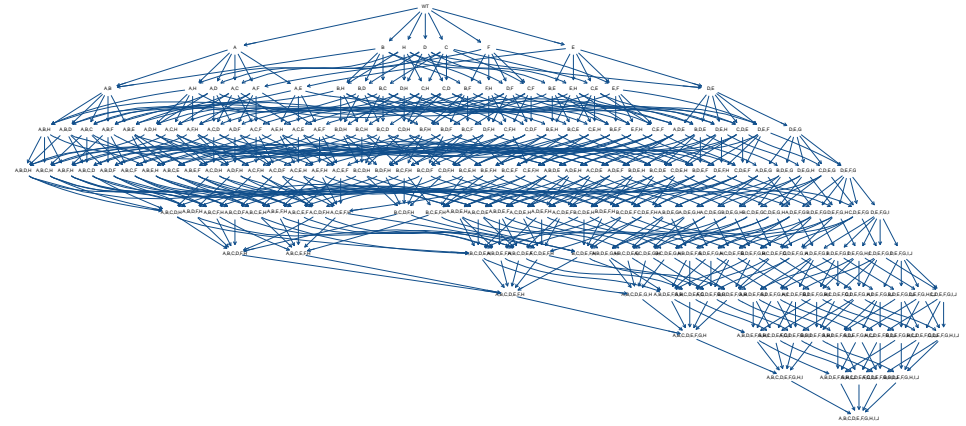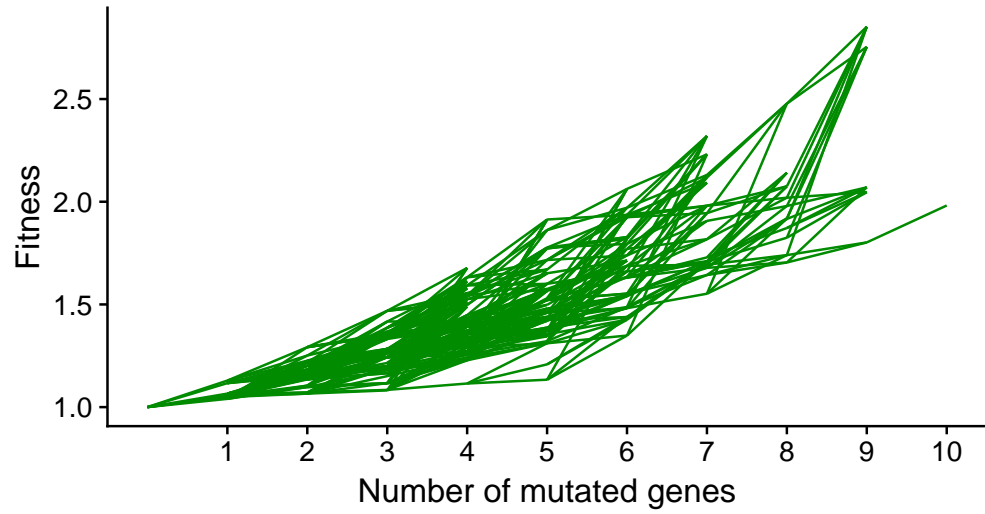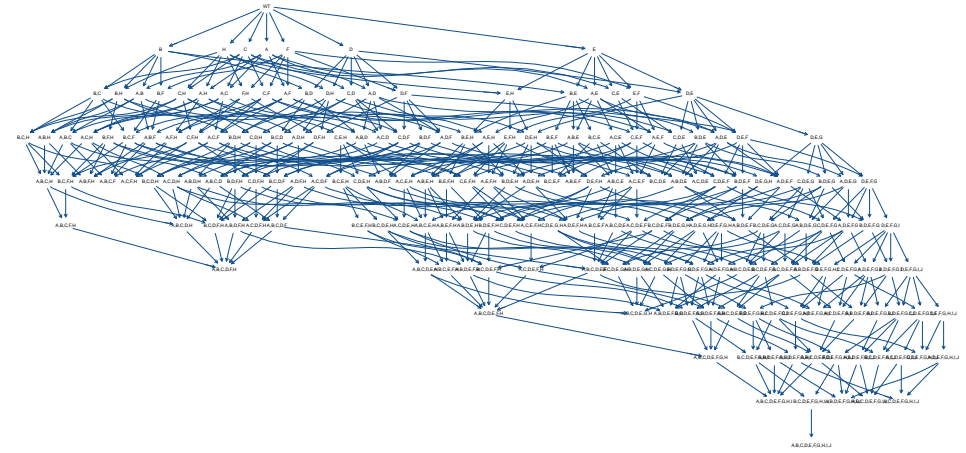

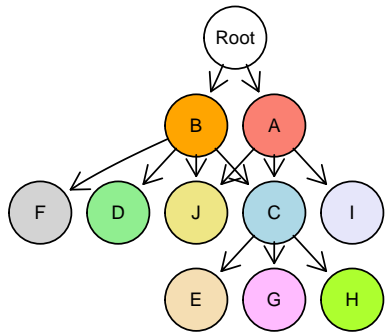

ID NXDMDVPfzyoQDyuP  
 acc genotypes 151  
 peaks no back 11  
 removed edges 90  
 prop rem edges 0.177

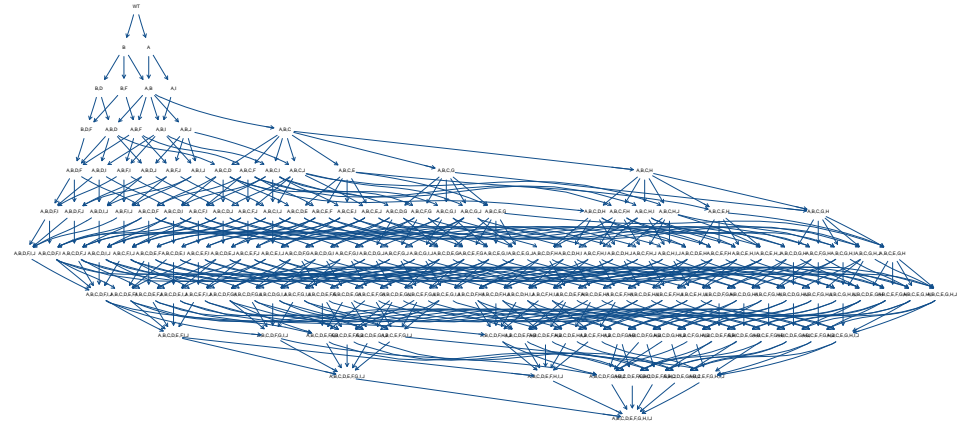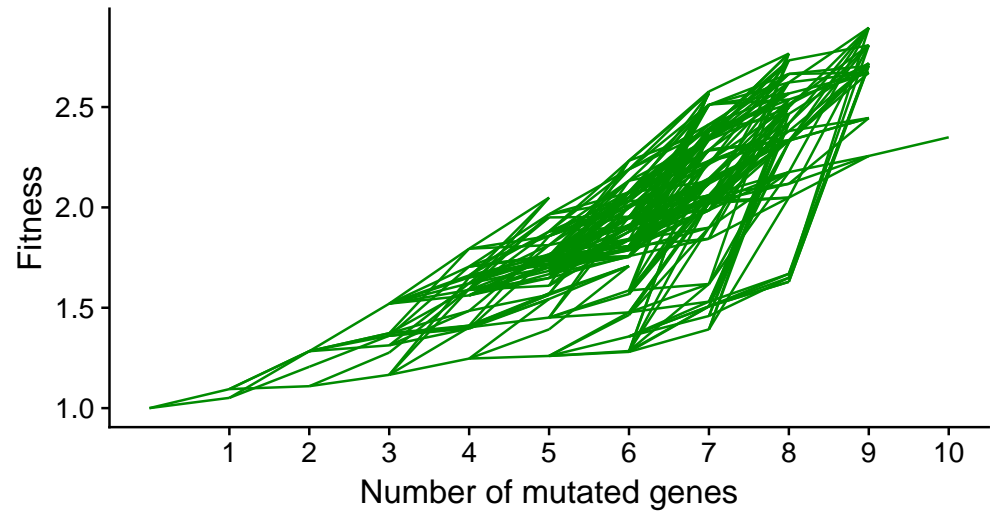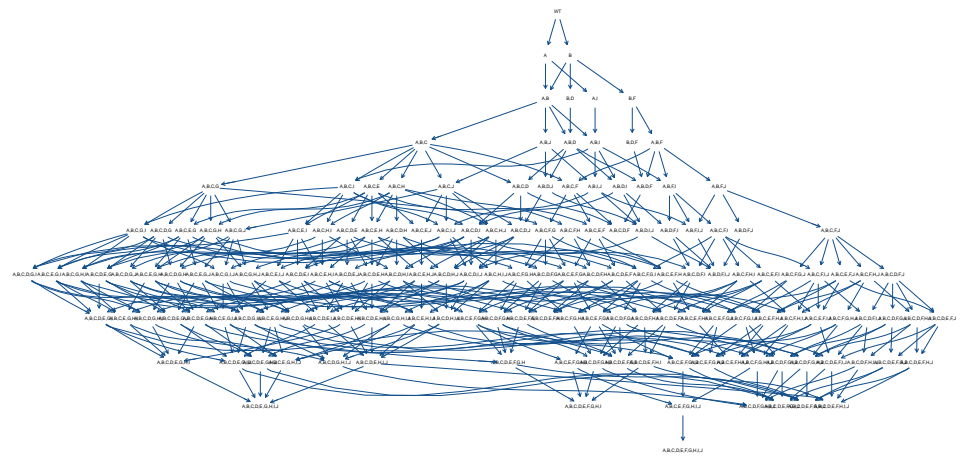



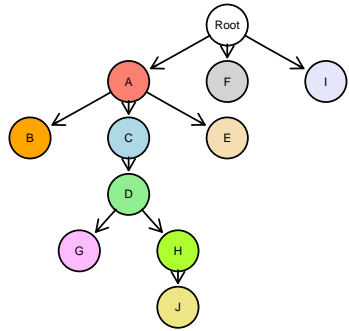

ID **o8OvpWleTYvSAYxY**  
 acc genotypes **132**  
 peaks no back **13**  
 removed edges **67**  
 prop rem edges **0.164**

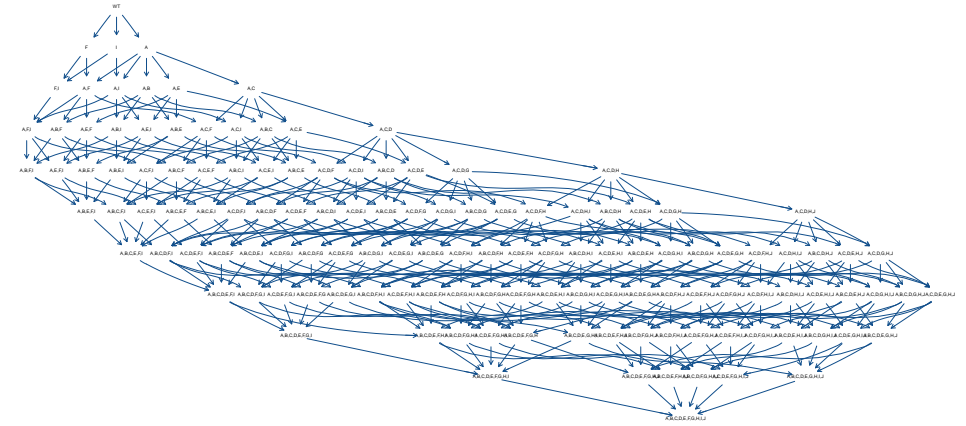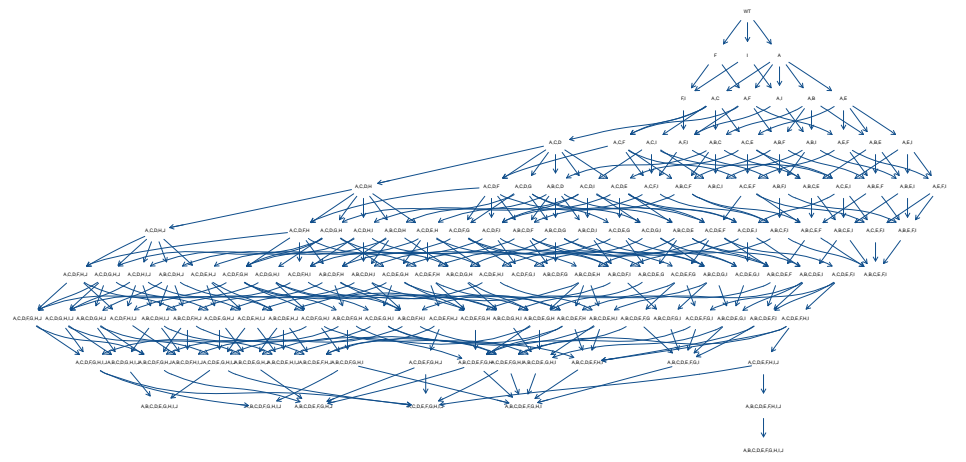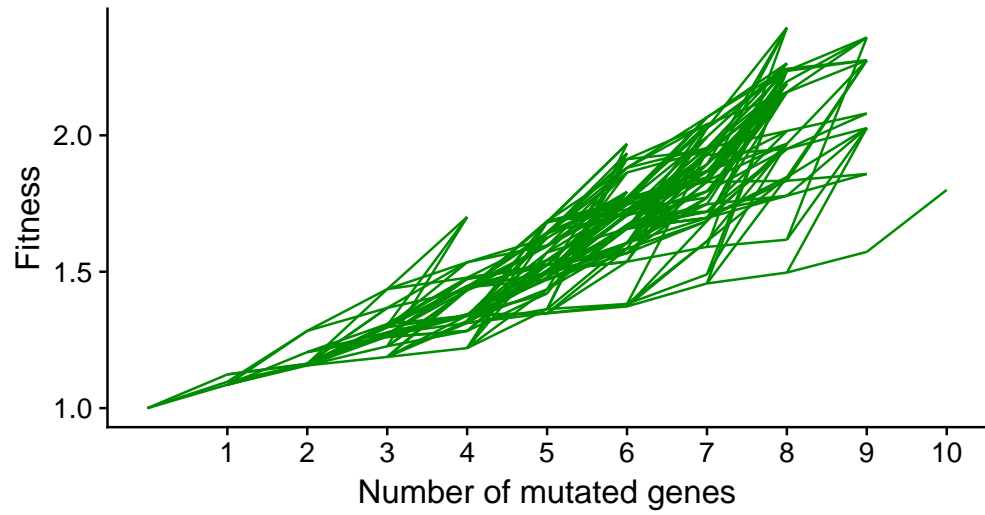

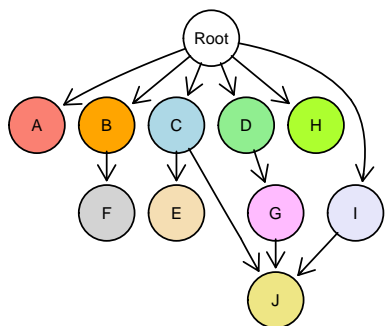

ID ochEhKnsBx3ftyMD  
 acc genotypes 240  
 peaks no back 19  
 removed edges 173  
 prop rem edges 0.208

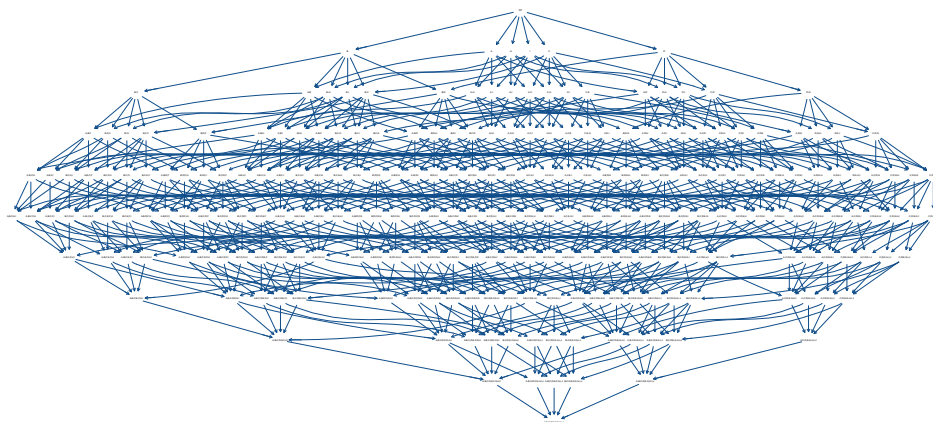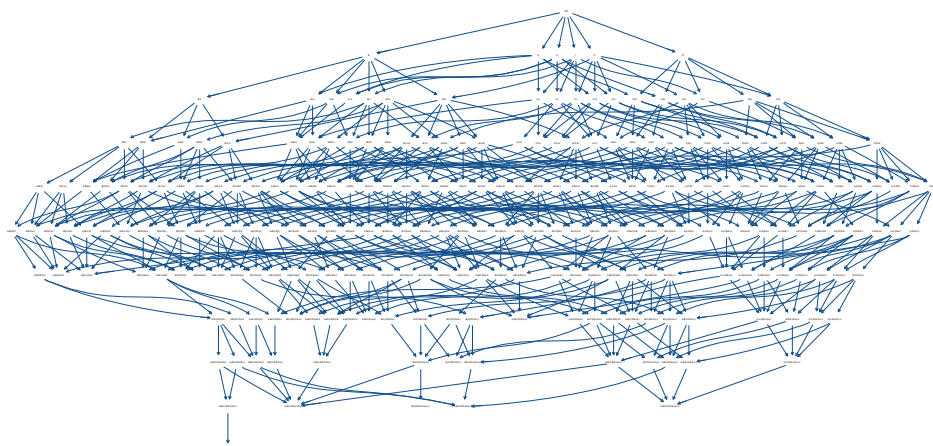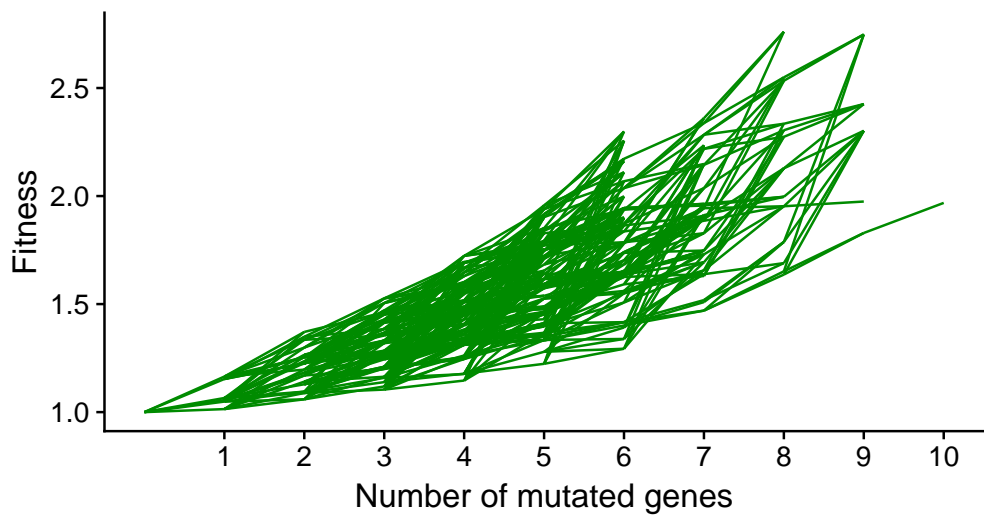

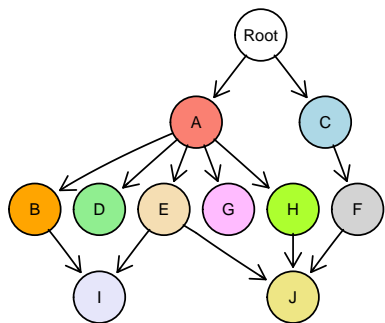

ID **OCRTvAy6n6Rv7KAn**  
 acc genotypes **135**  
 peaks no back **11**  
 removed edges **80**  
 prop rem edges **0.192**

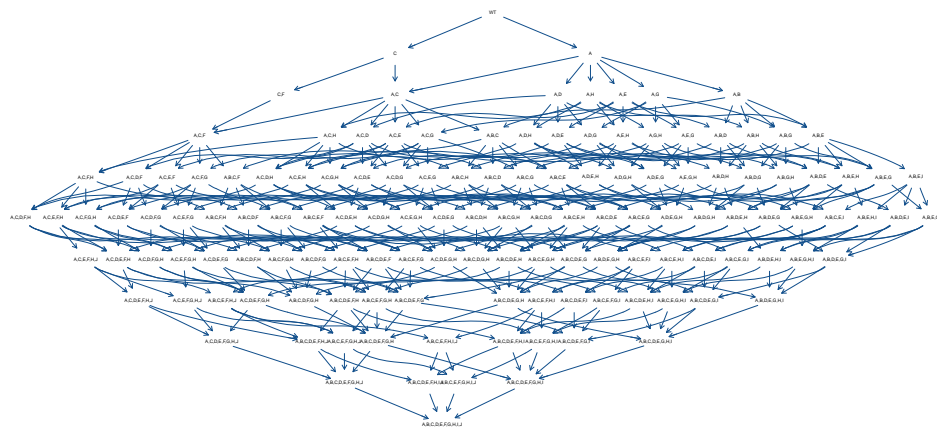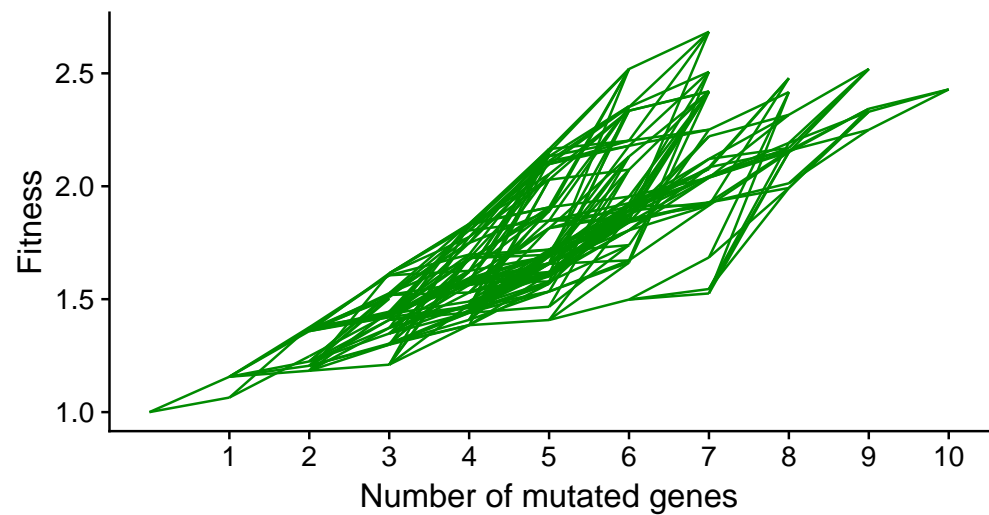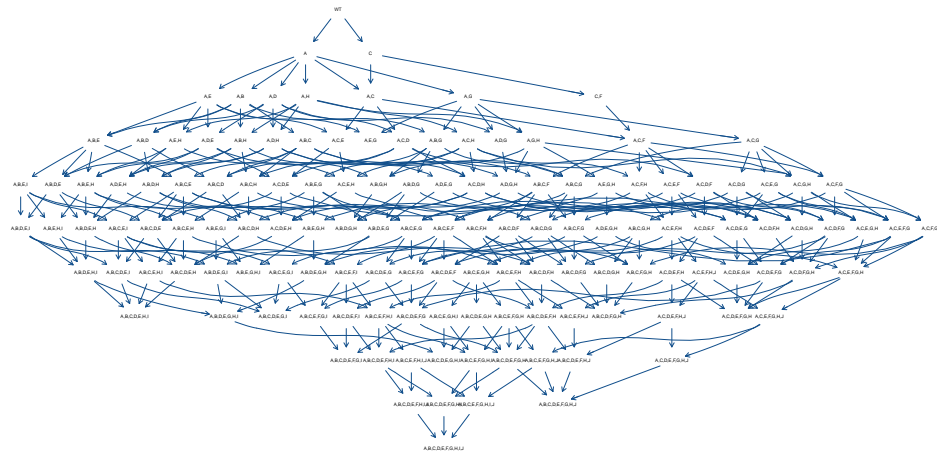

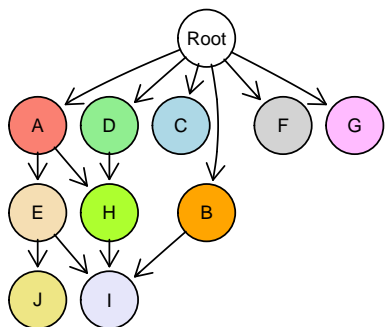

ID **Oo5hmM8b710XcCc1x**  
 acc genotypes **192**  
 peaks no back **15**  
 removed edges **118**  
 prop rem edges **0.184**

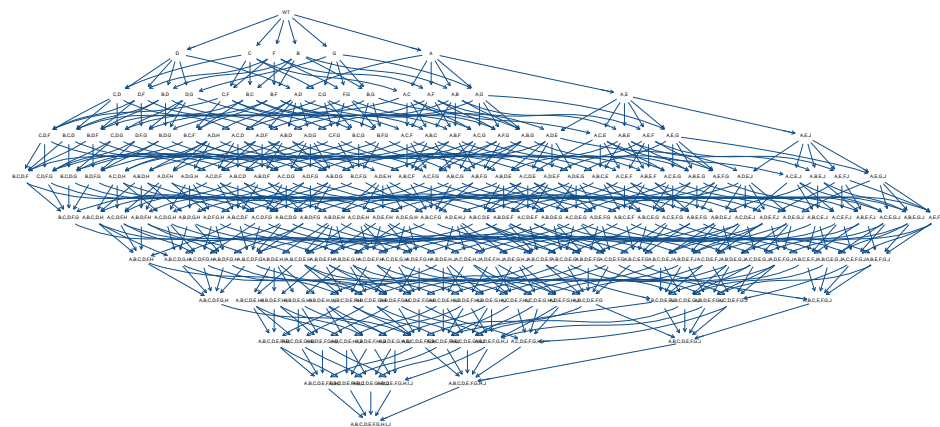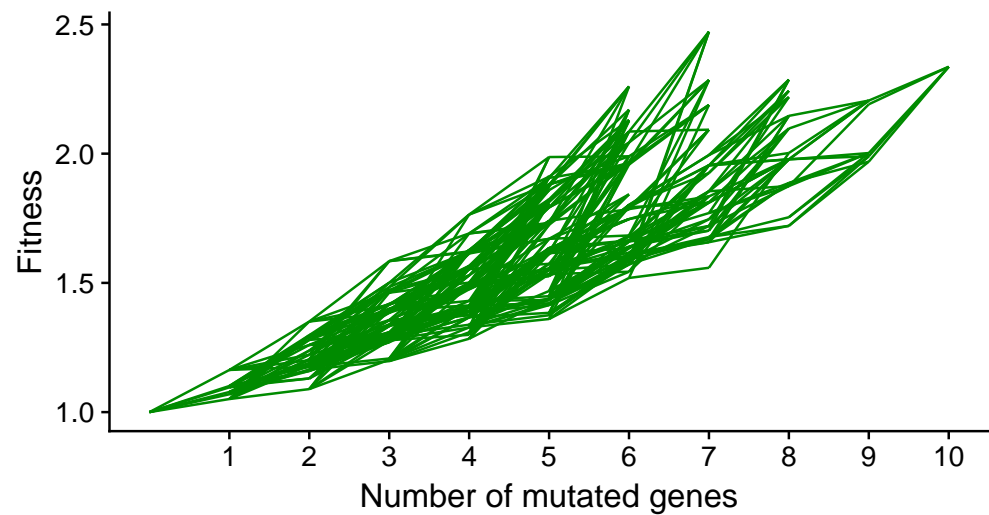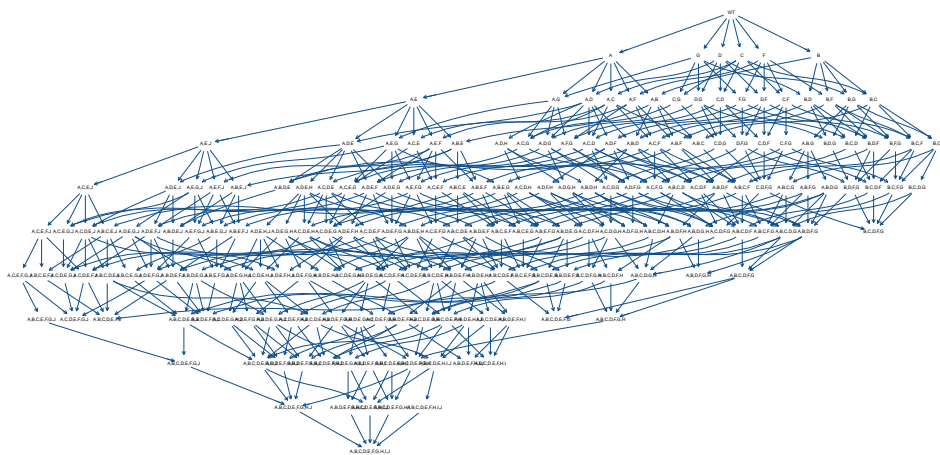

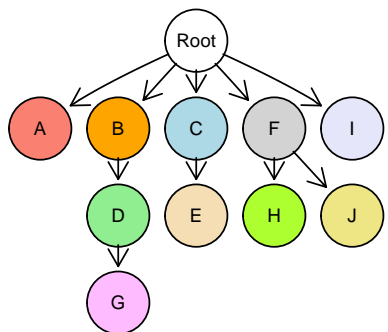

ID OrLY4wrCbAM10e8mH  
 acc genotypes 240  
 peaks no back 16  
 removed edges 141  
 prop rem edges 0.172

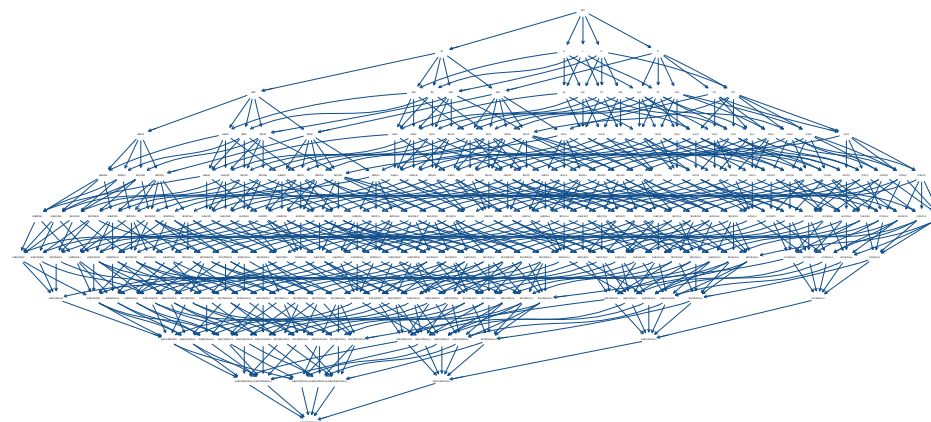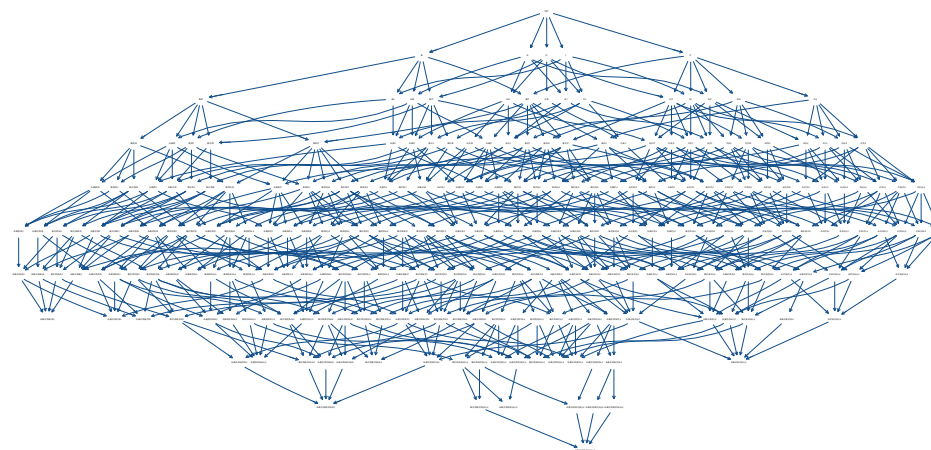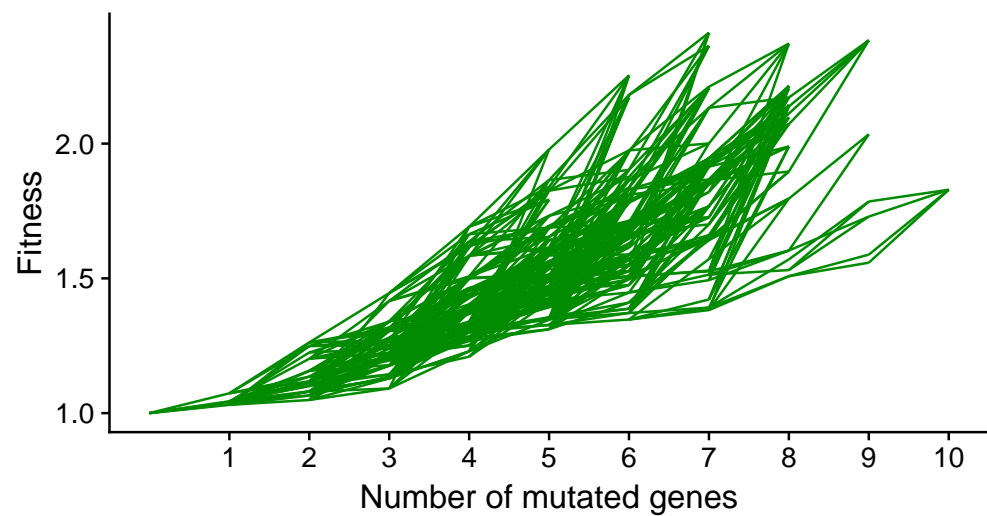

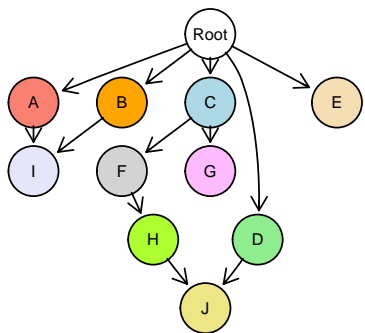

ID **OSil7b1keOUdWfpZ**  
 acc genotypes **160**  
 peaks no back **16**  
 removed edges **100**  
 prop rem edges **0.2**

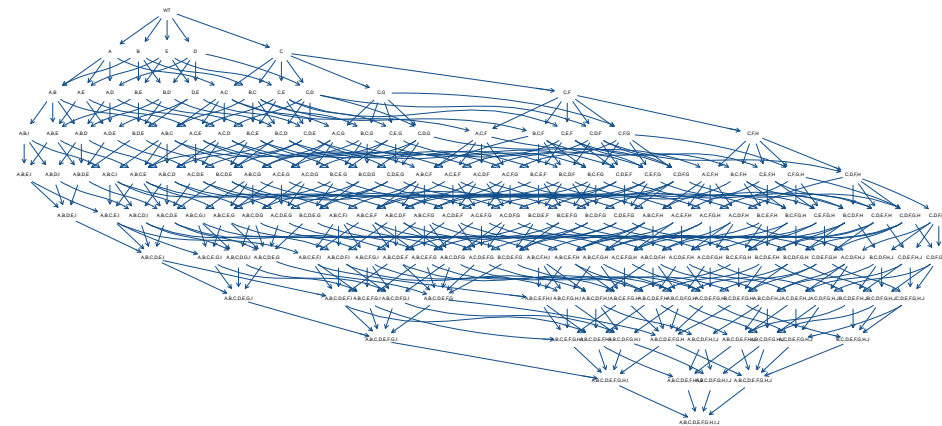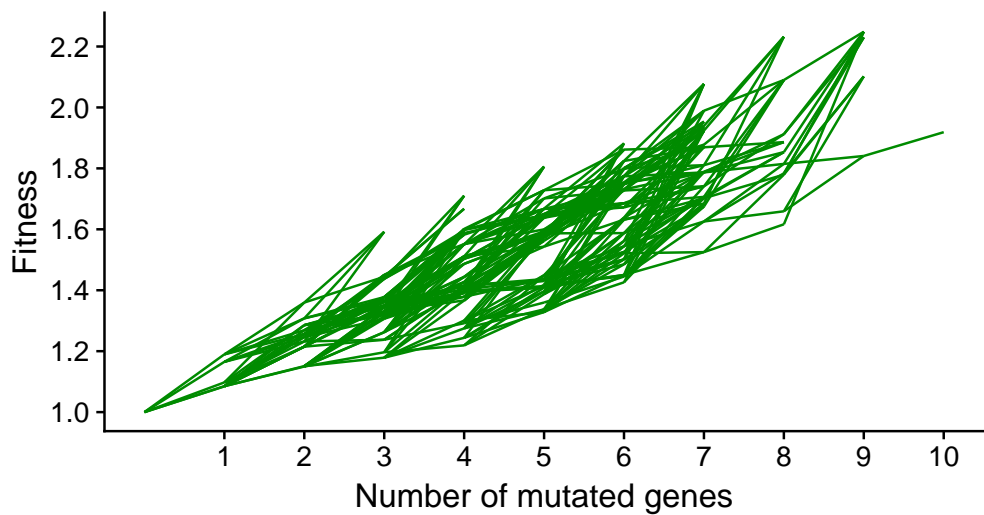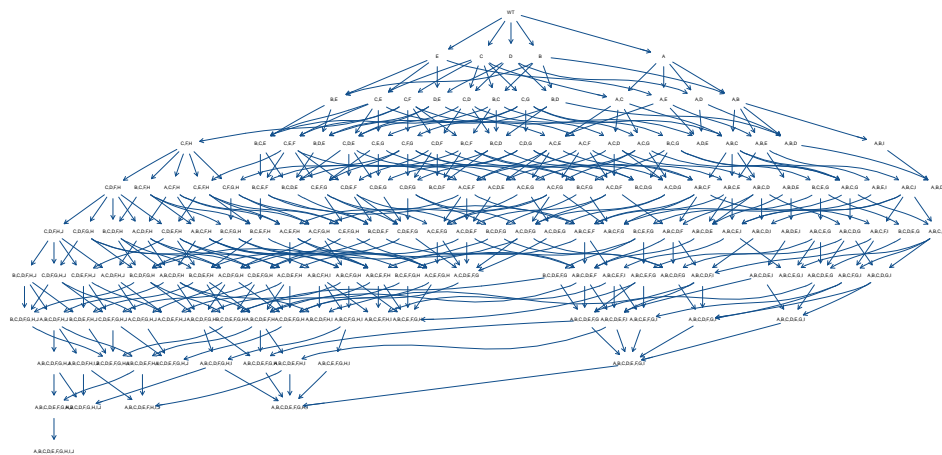

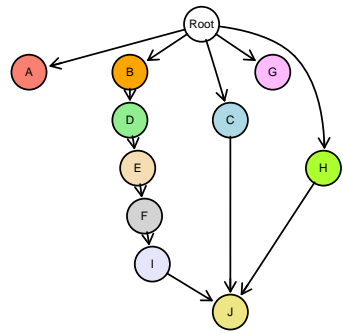

ID **Oxbm8SnMAxb9VCsc**  
 acc genotypes **100**  
 peaks no back **10**  
 removed edges **49**  
 prop rem edges **0.175**

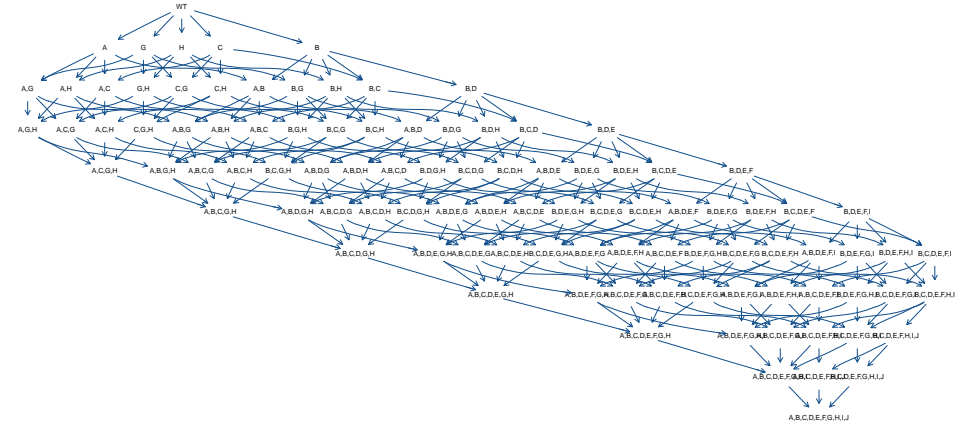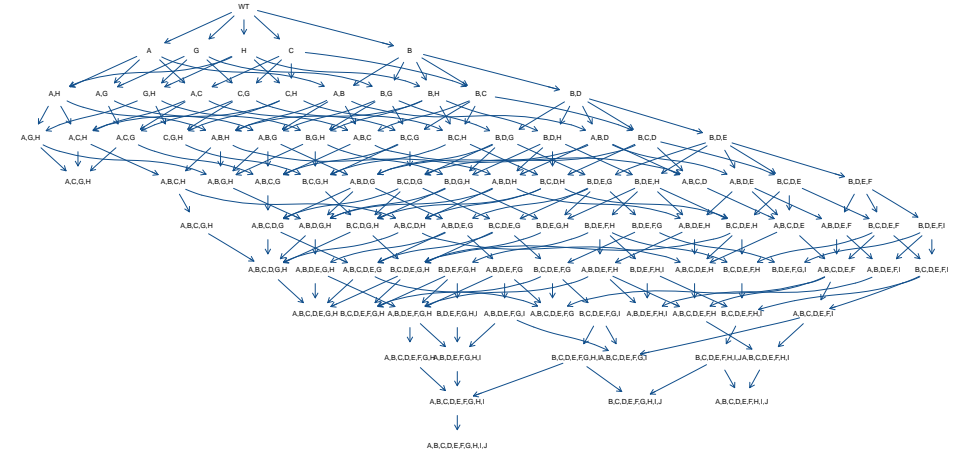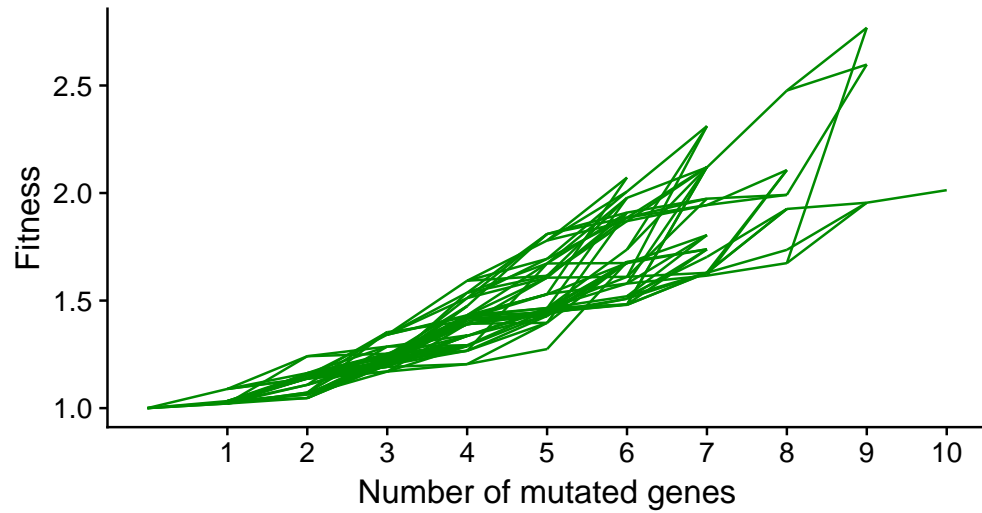

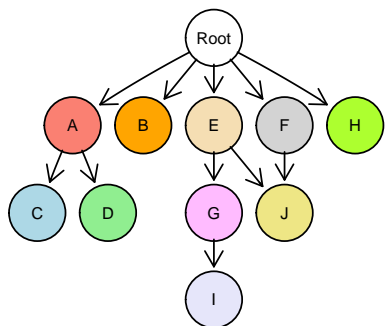

ID PG8DkzMLvLzGnrF10  
 acc genotypes 220  
 peaks no back 18  
 removed edges 161  
 prop rem edges 0.218

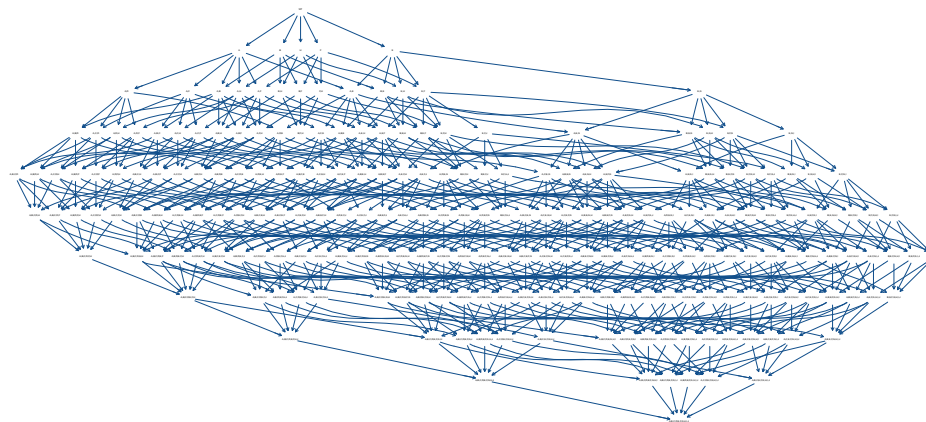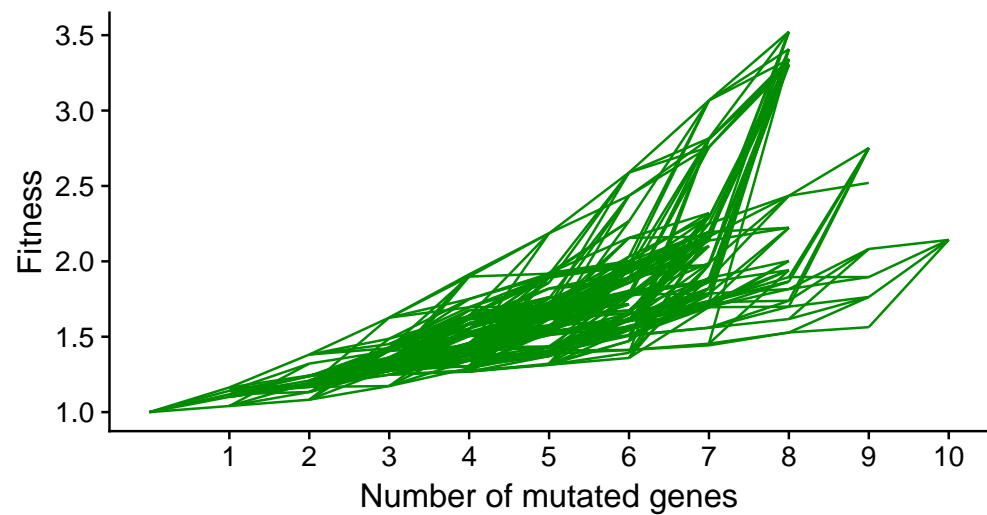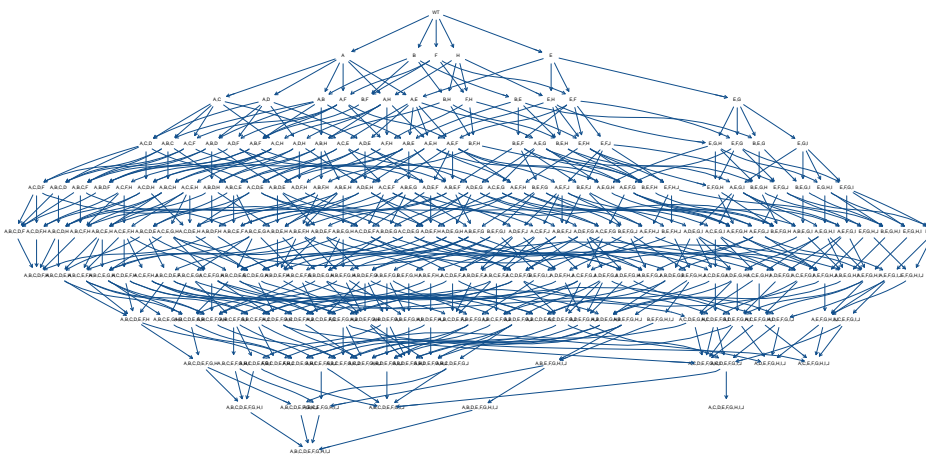



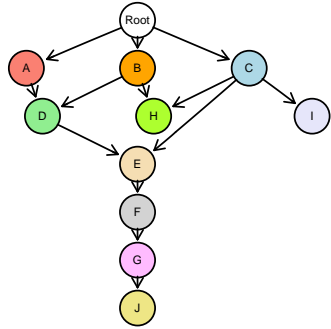

ID [pLto5Tz84T9OOoht](#)  
 acc genotypes 37  
 peaks no back 6  
 removed edges 13  
 prop rem edges 0.186

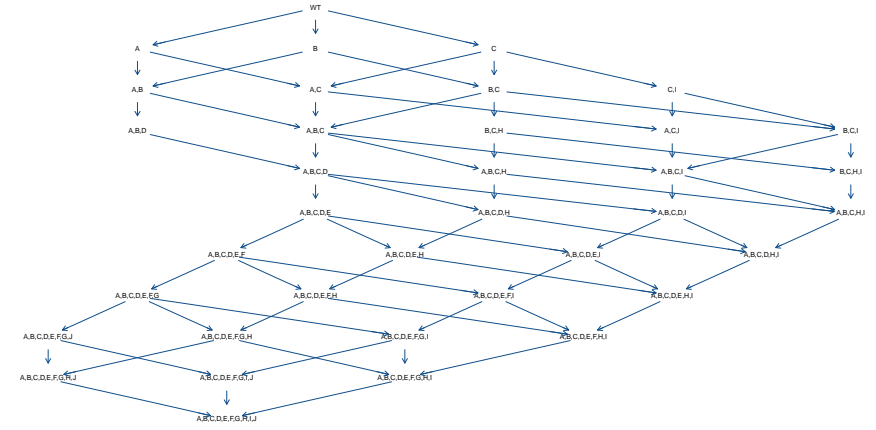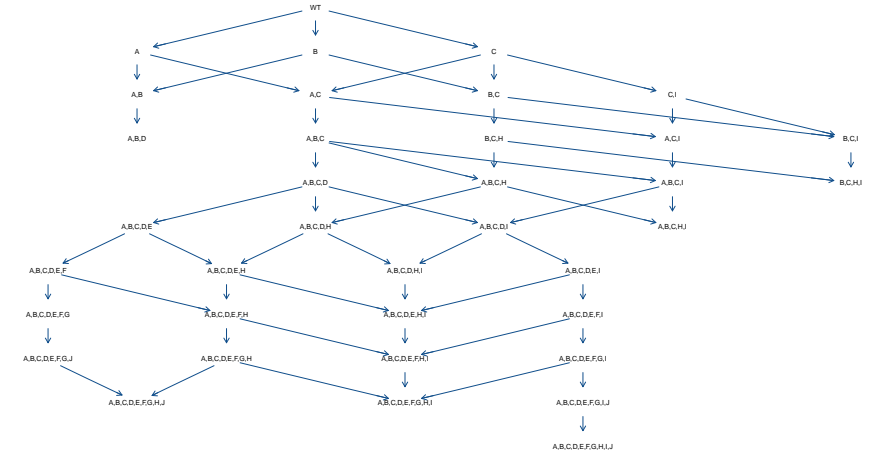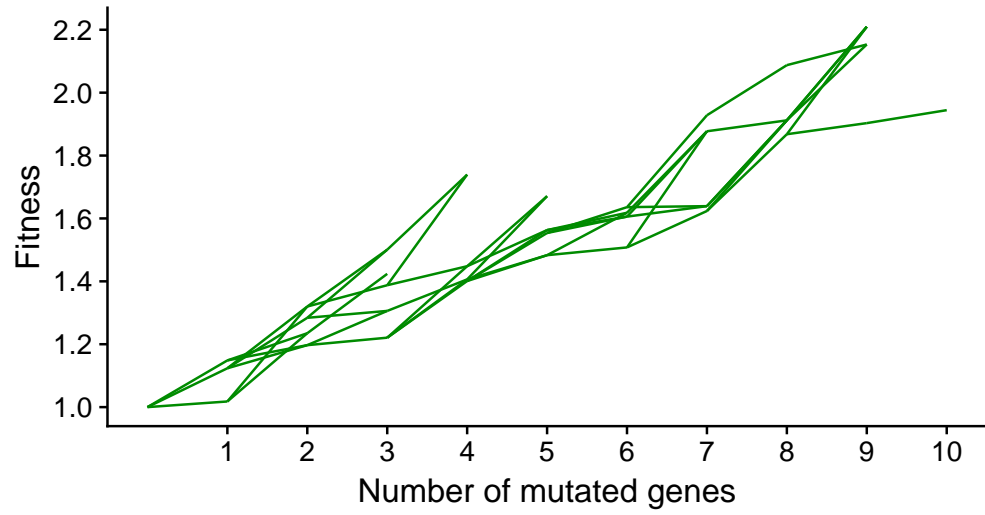

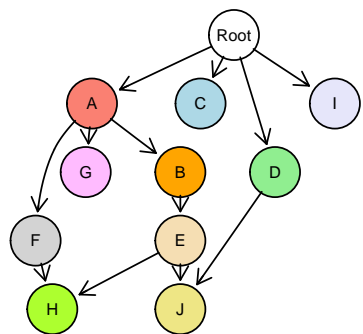

ID **PNEwdgl2i1dRkK3p**  
 acc genotypes **144**  
 peaks no back **15**  
 removed edges **87**  
 prop rem edges **0.194**

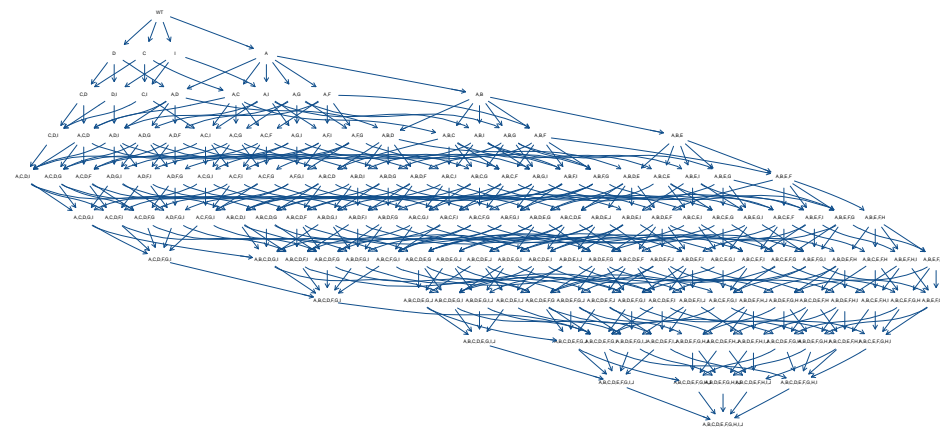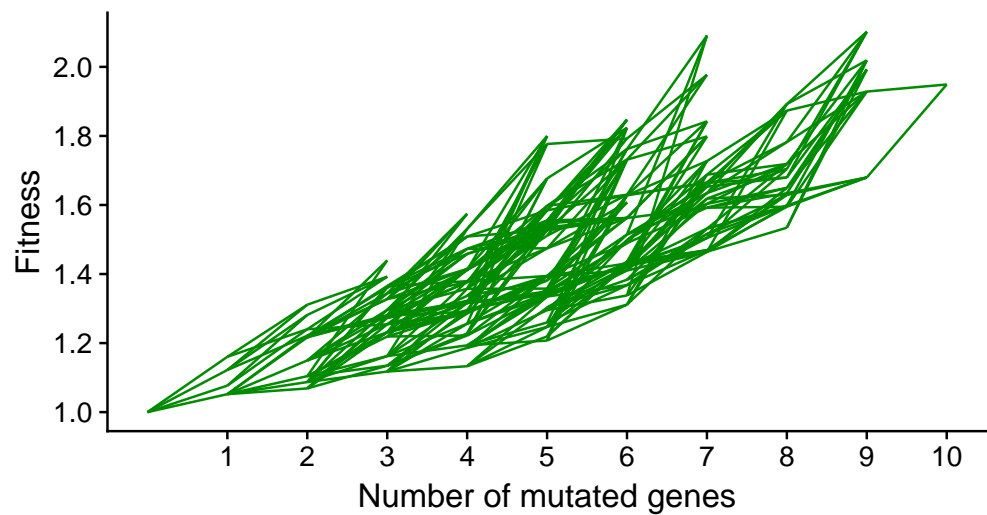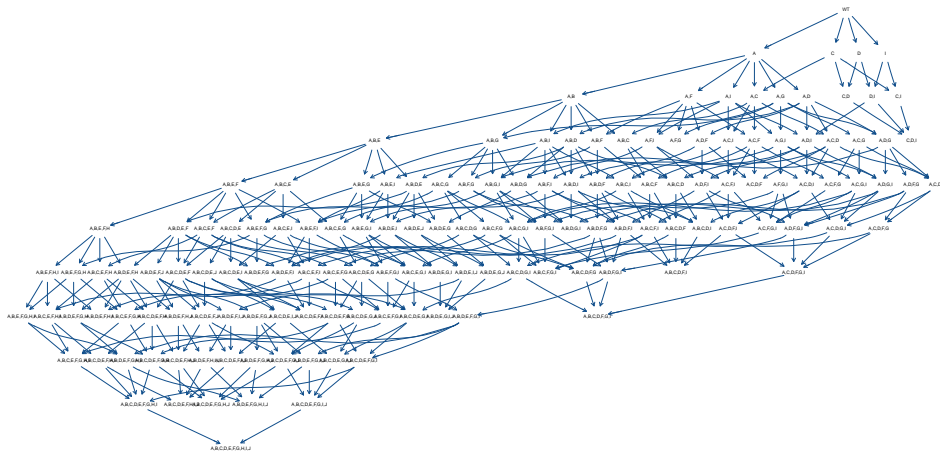

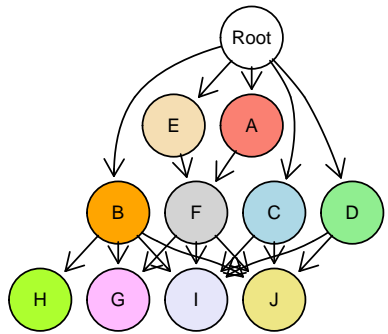

ID PpAWVK9tbBJENITR  
 acc genotypes 80  
 peaks no back 12  
 removed edges 43  
 prop rem edges 0.207

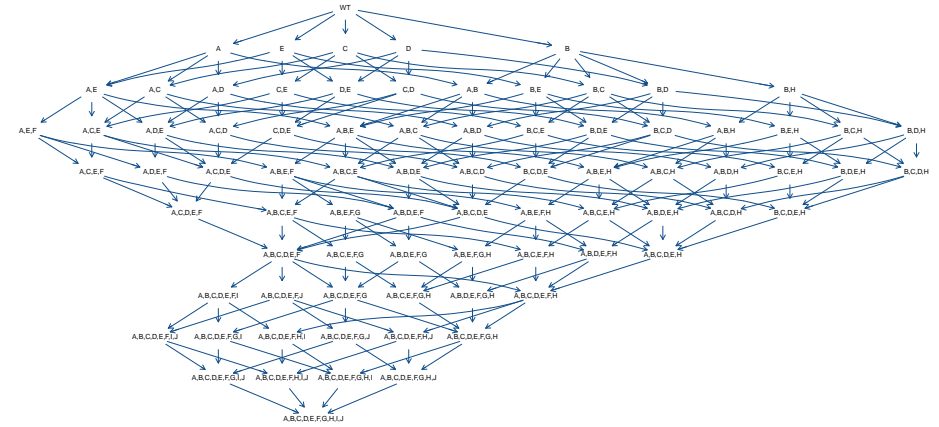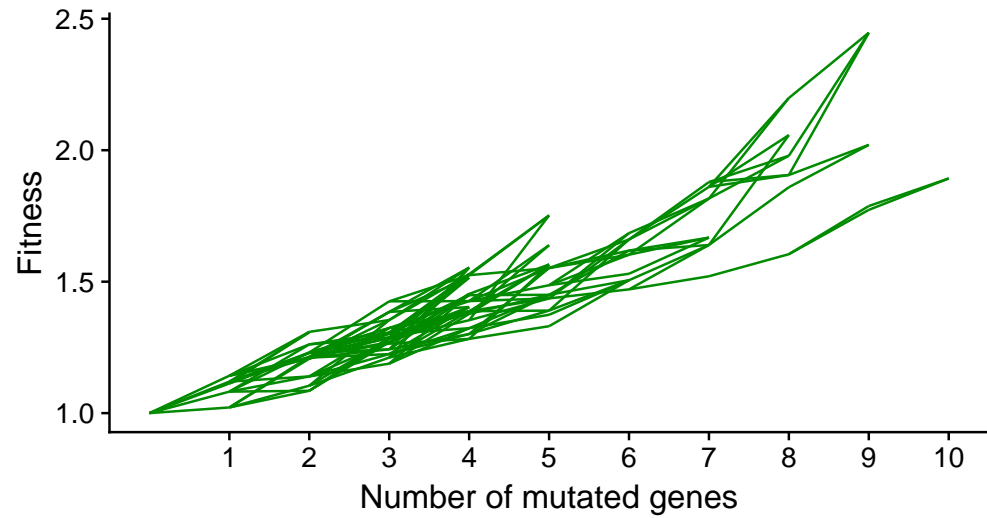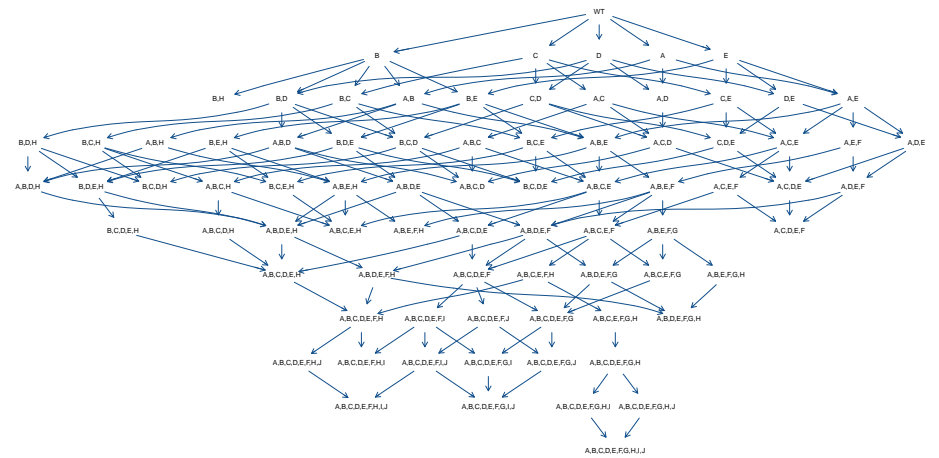

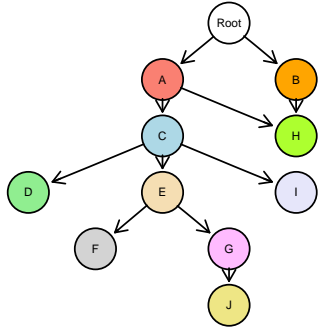

ID **Pqr5tjYF1SZIZUV10**  
 acc genotypes **89**  
 peaks no back **9**  
 removed edges **46**  
 prop rem edges **0.189**

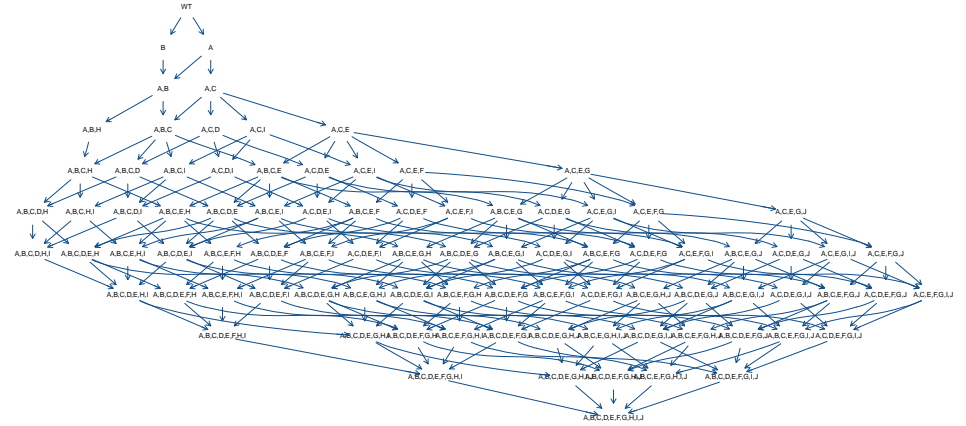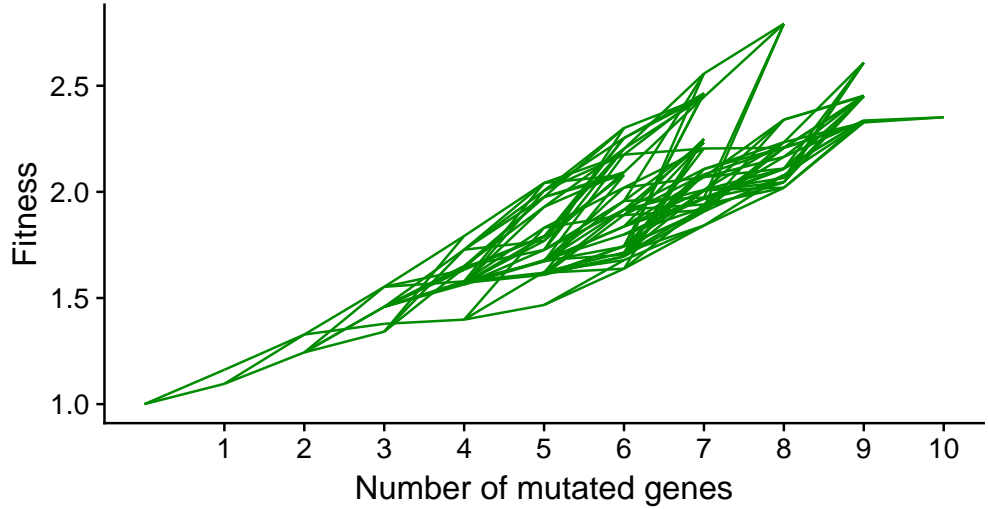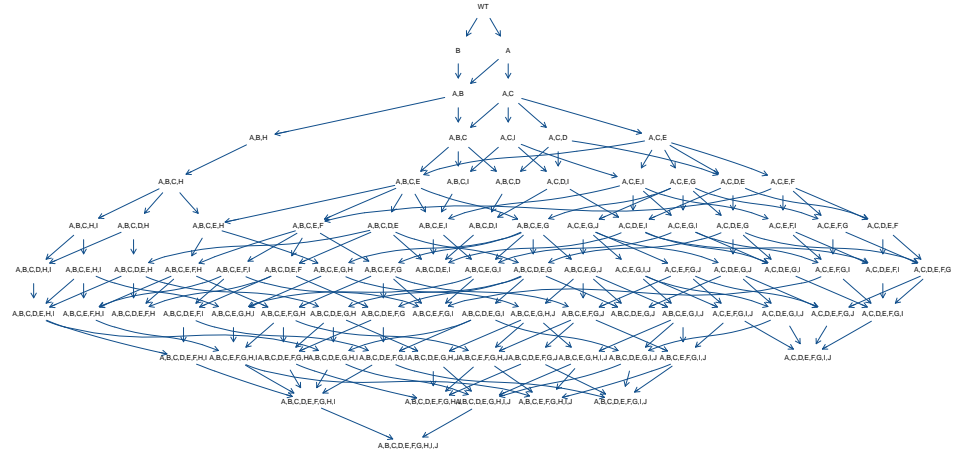

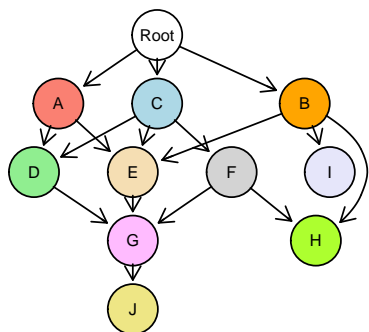

ID **q4xh5ljukplhq9H9**  
 acc genotypes **50**  
 peaks no back **7**  
 removed edges **20**  
 prop rem edges **0.187**

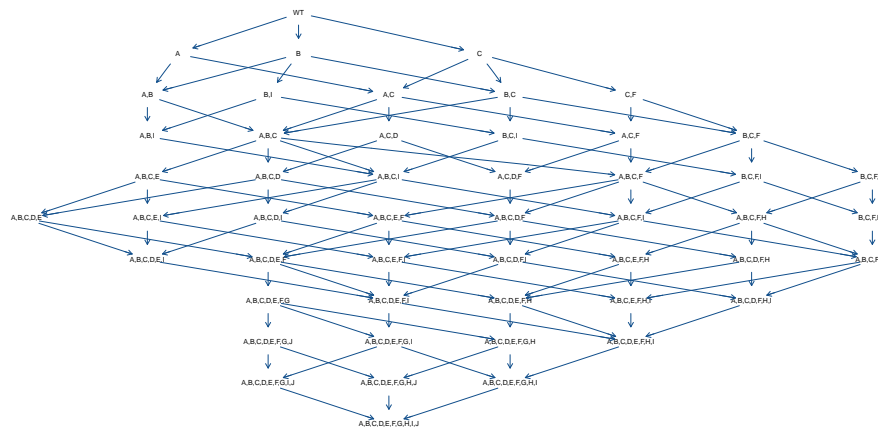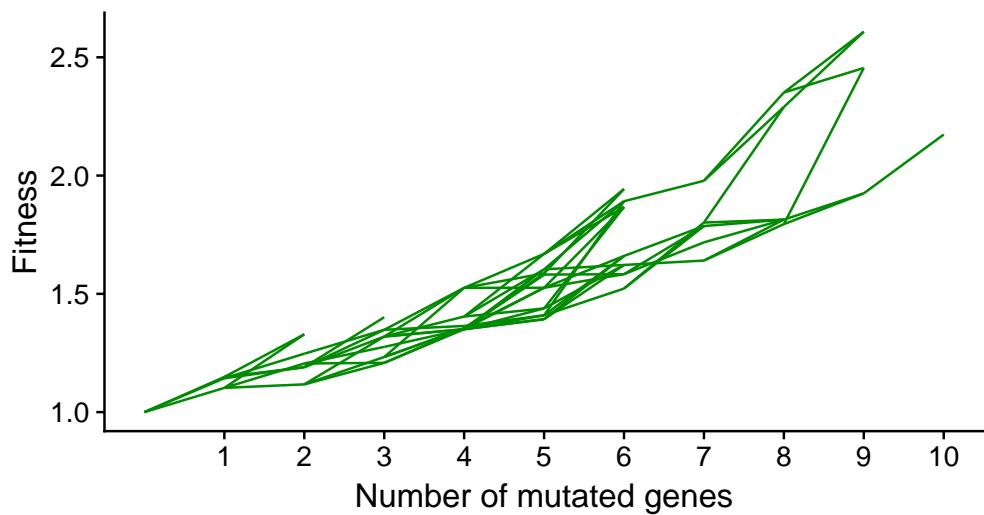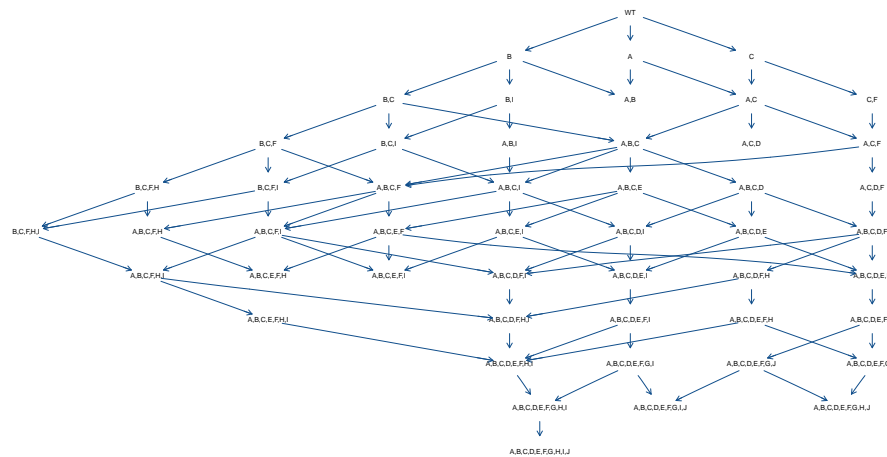

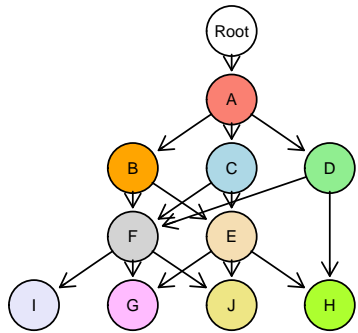

ID [q7yEvxoMttQHd9KY](#)  
 acc genotypes 30  
 peaks no back 7  
 removed edges 10  
 prop rem edges 0.182

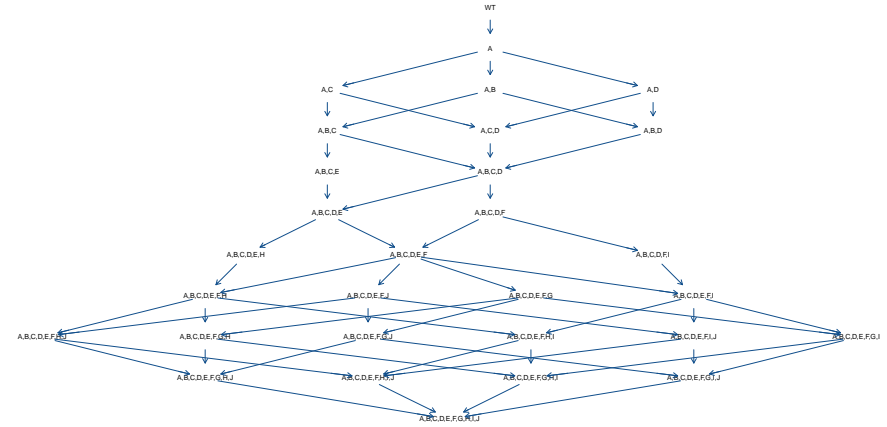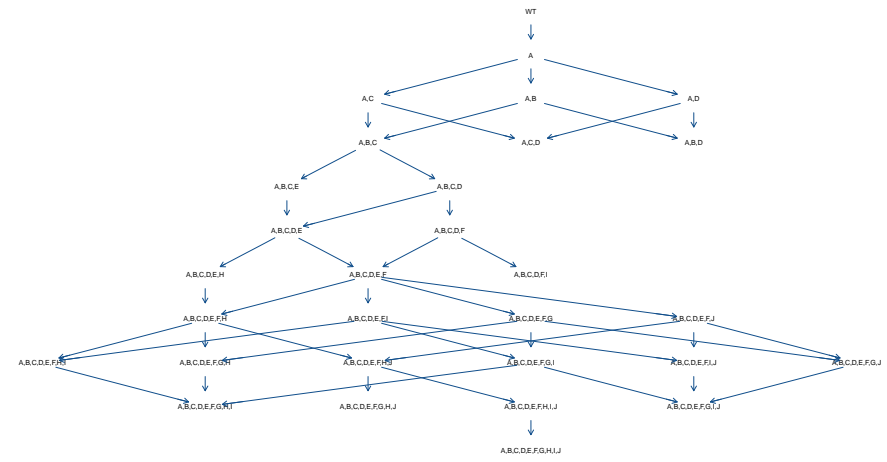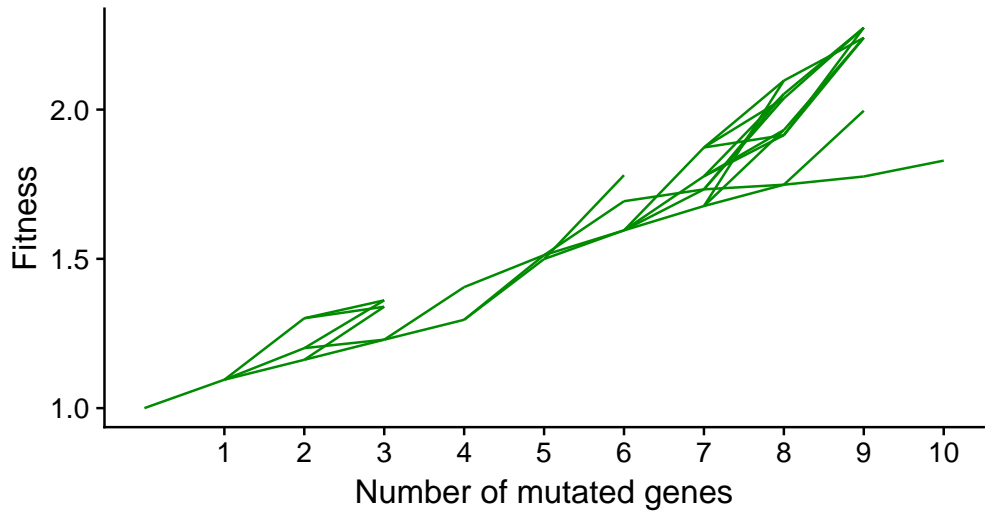

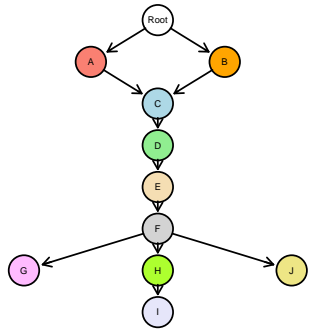

ID [qA5UjjBYFJWi5Ddc](#)  
 acc genotypes 19  
 peaks no back 3  
 removed edges 2  
 prop rem edges 0.071

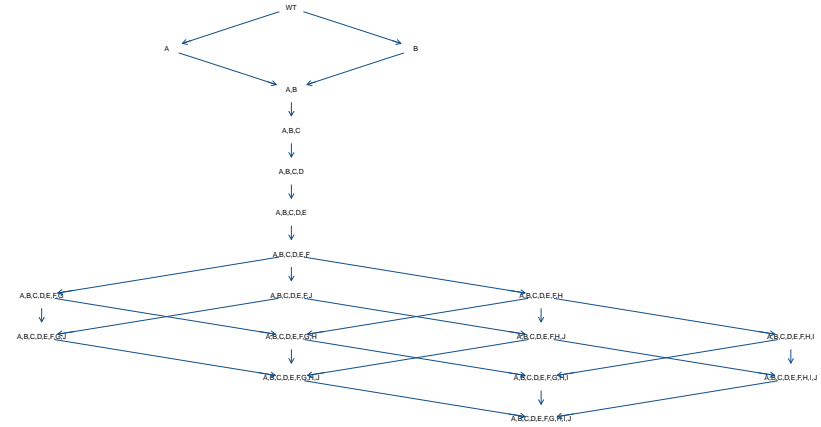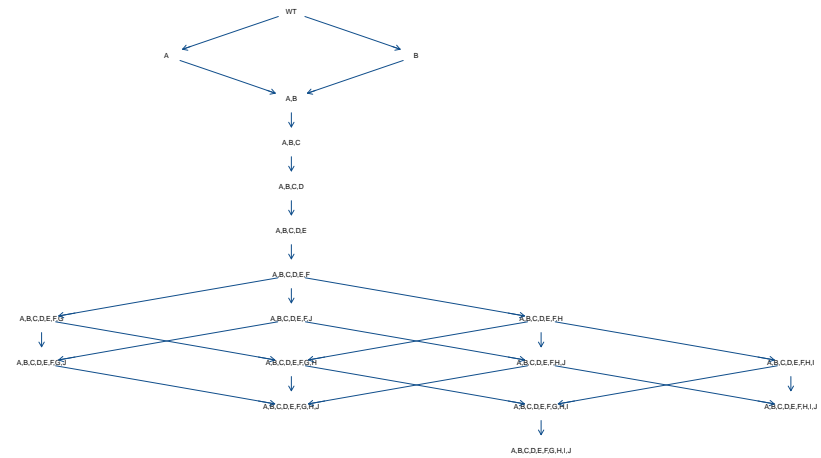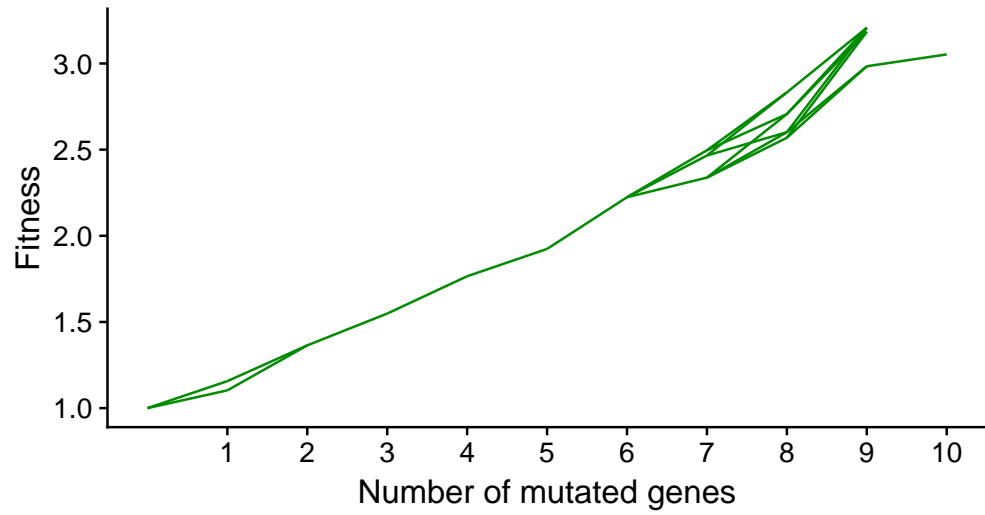

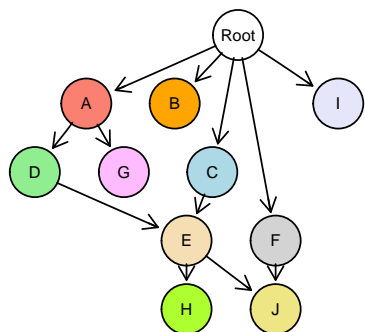

ID QpSOnT7M3hBKpMNs  
 acc genotypes 128  
 peaks no back 13  
 removed edges 84  
 prop rem edges 0.219

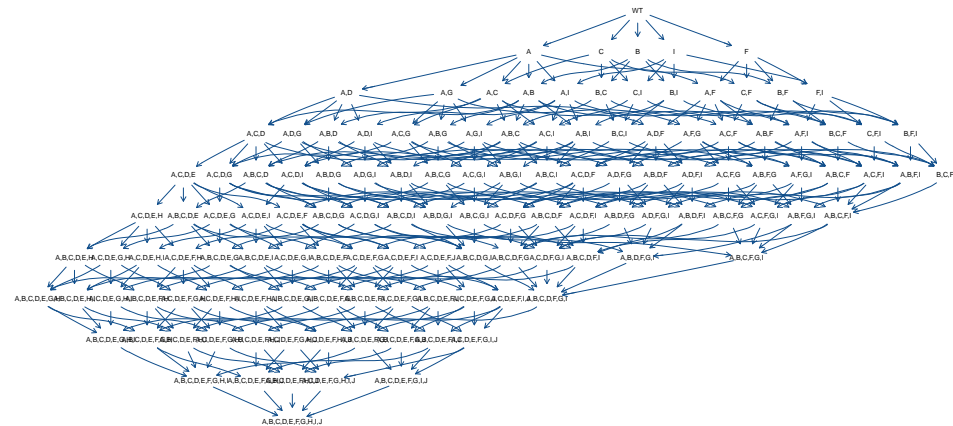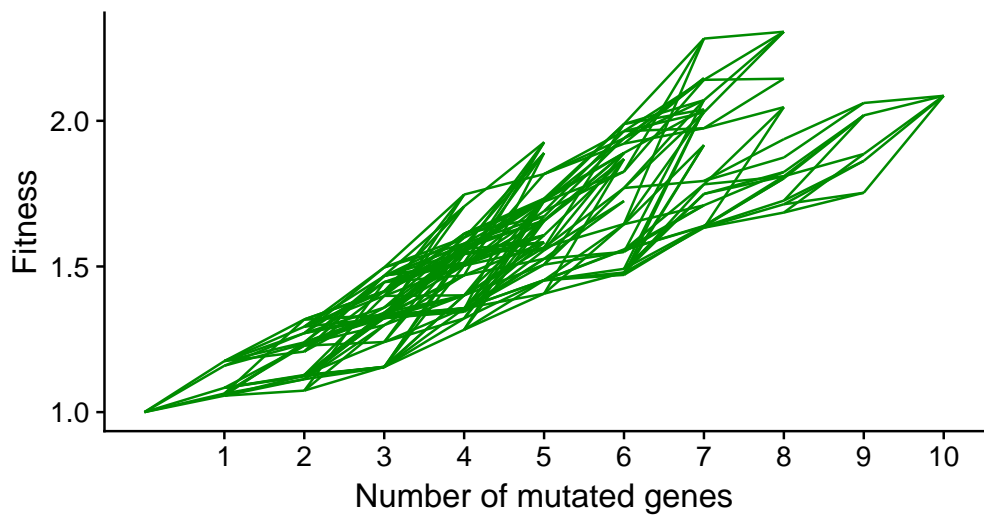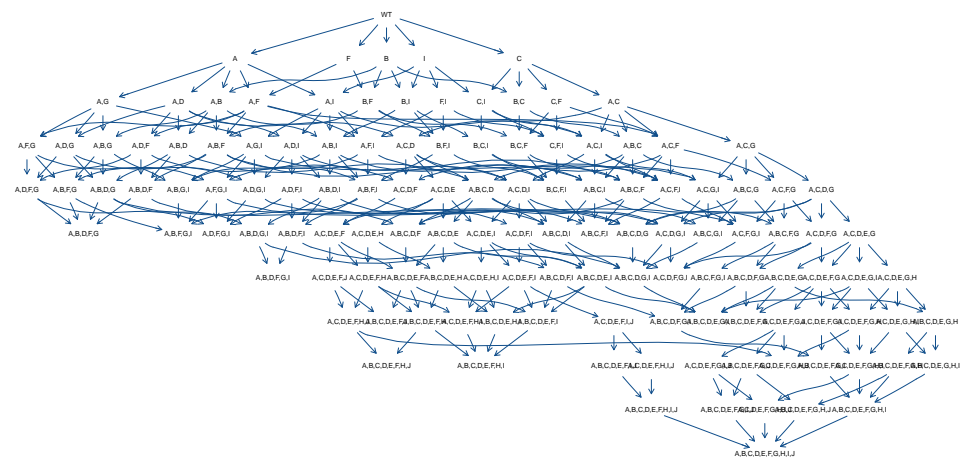



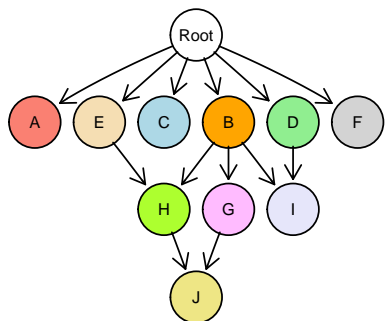

ID **QTeBb3tzhv6dF9ly**  
 acc genotypes **200**  
 peaks no back **16**  
 removed edges **103**  
 prop rem edges **0.154**

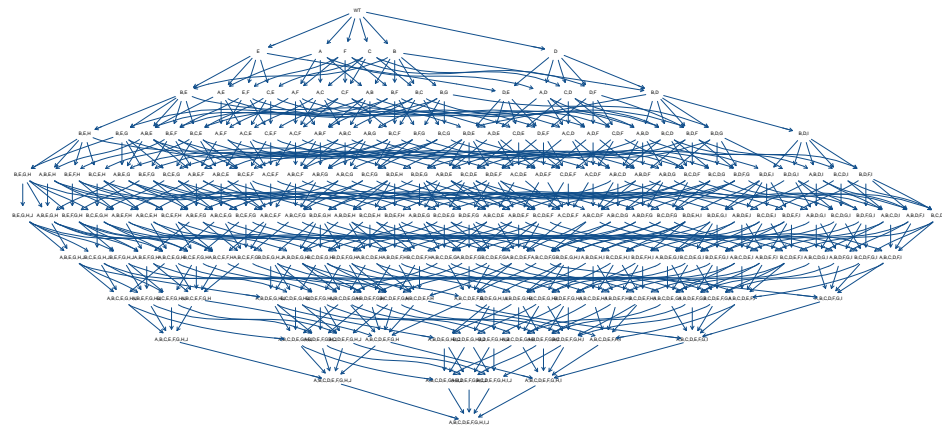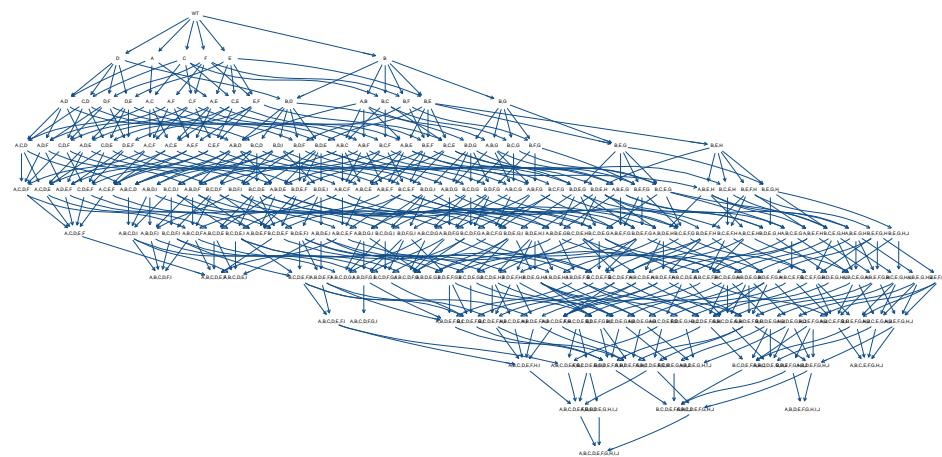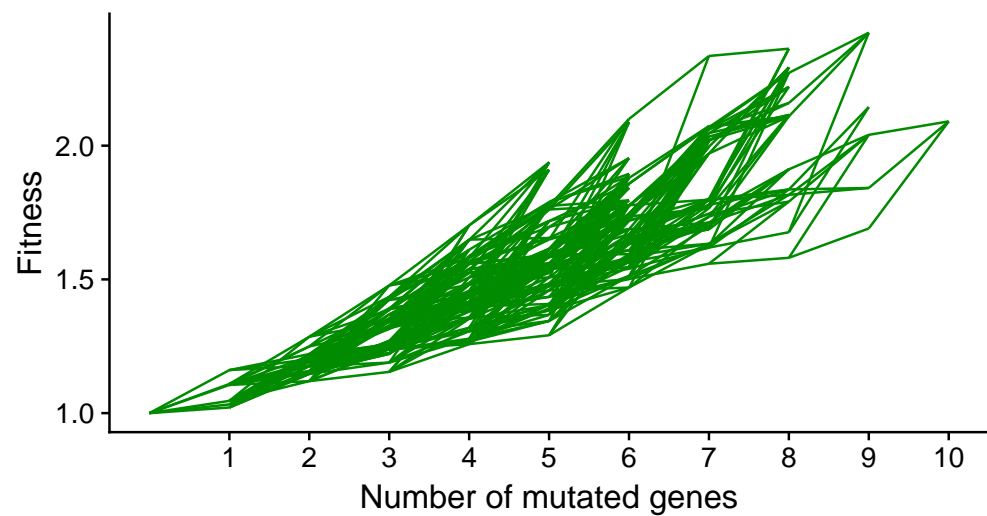

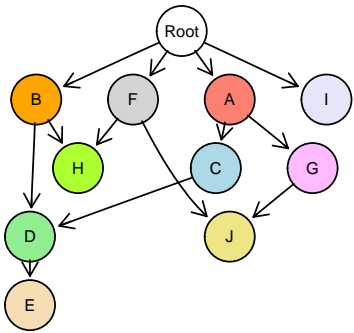

ID QVEfHMuWmdeBZFt  
 acc genotypes 94  
 peaks no back 11  
 removed edges 42  
 prop rem edges 0.171

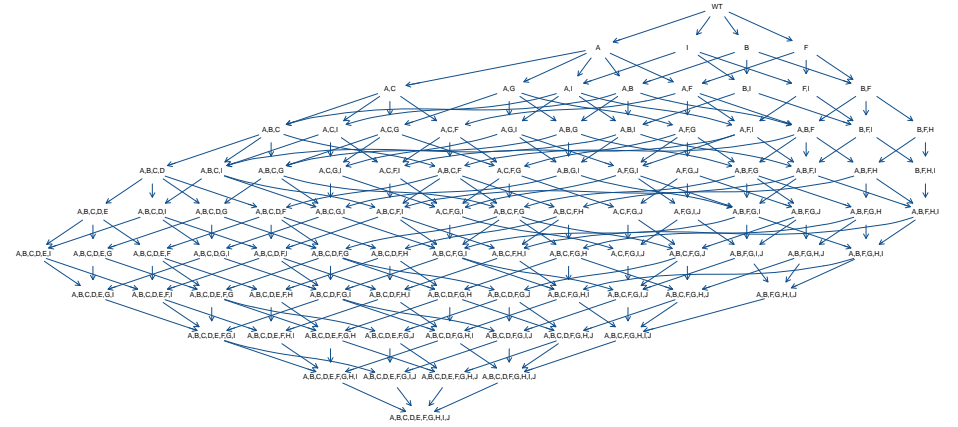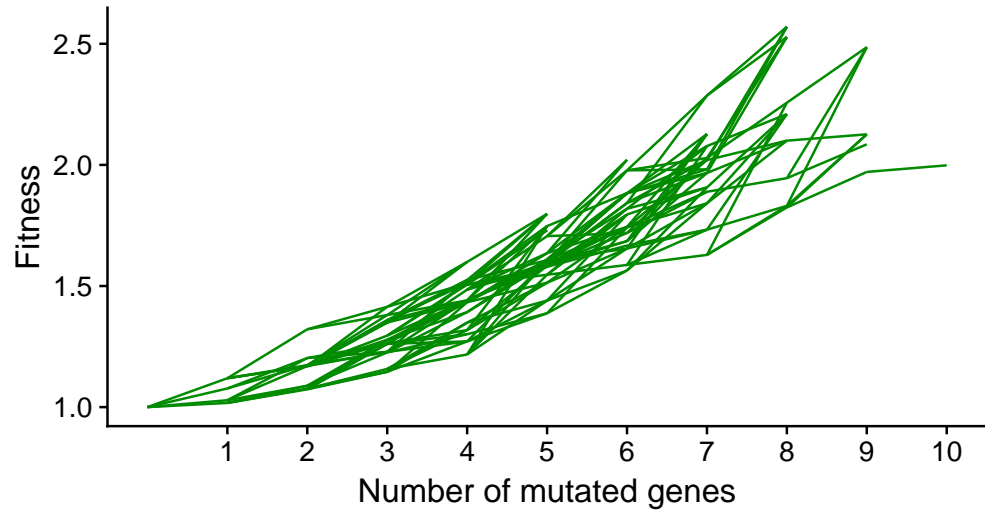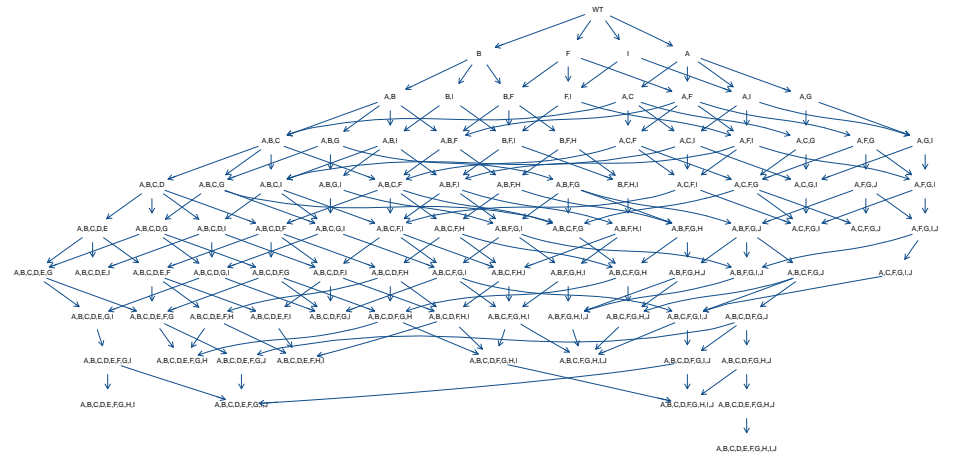

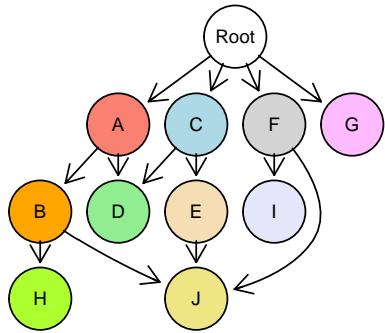

ID [qzPma2ONgy7W10OcP](#)  
 acc genotypes 124  
 peaks no back 12  
 removed edges 68  
 prop rem edges 0.192

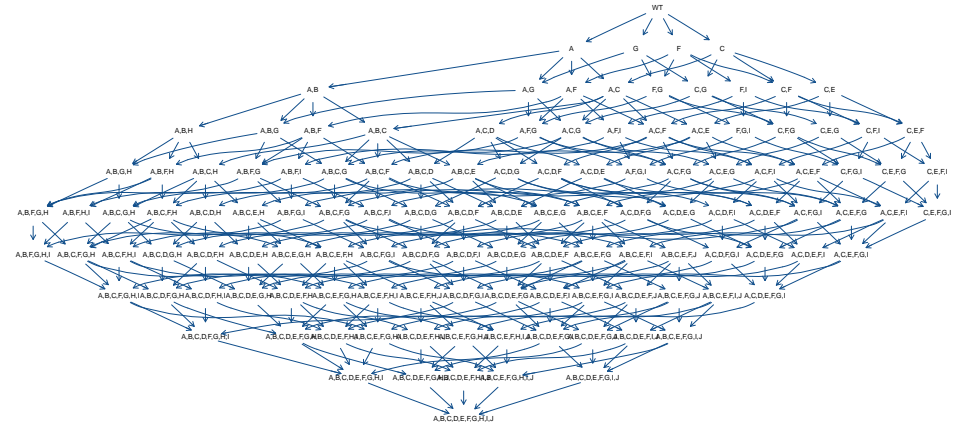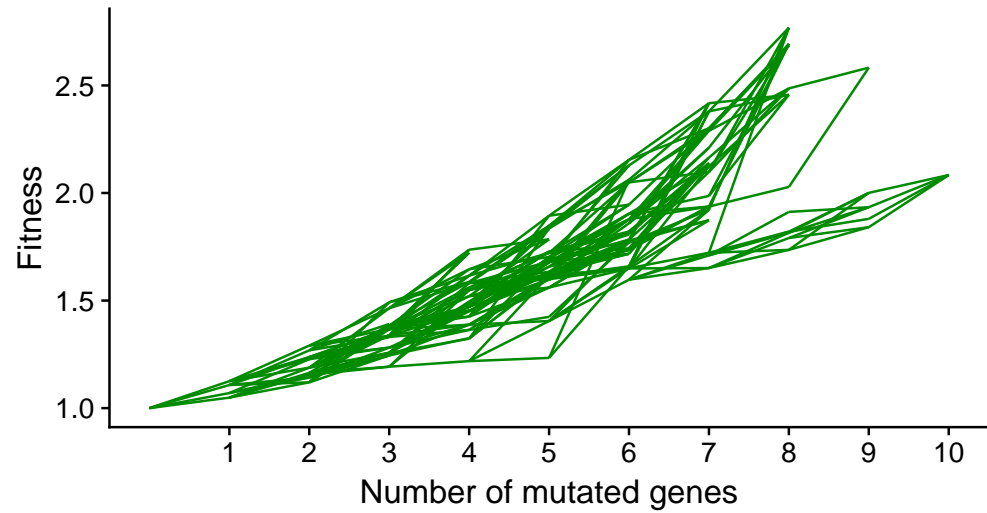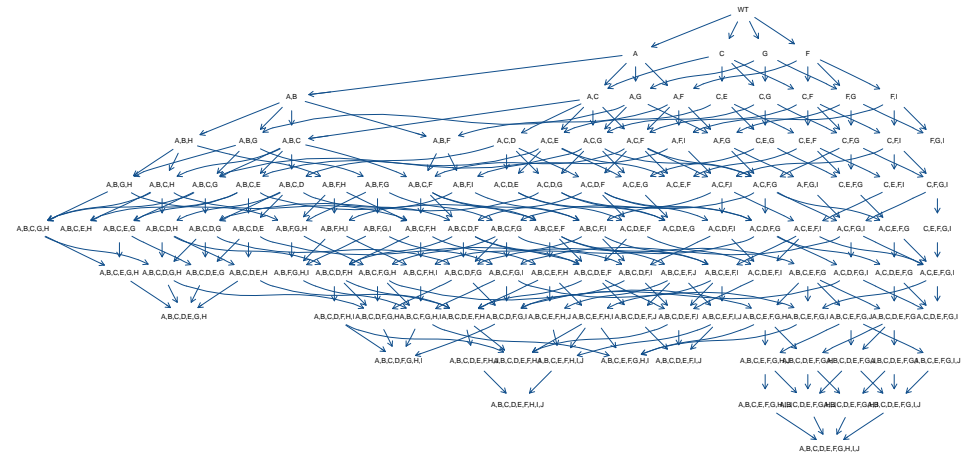

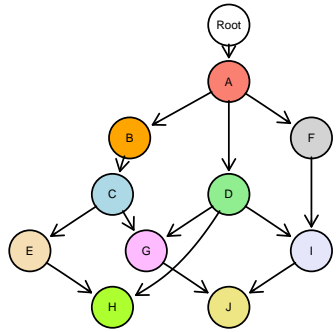

ID **r10ojqpU7Q5rU9ub3**  
 acc genotypes **36**  
 peaks no back **6**  
 removed edges **12**  
 prop rem edges **0.179**

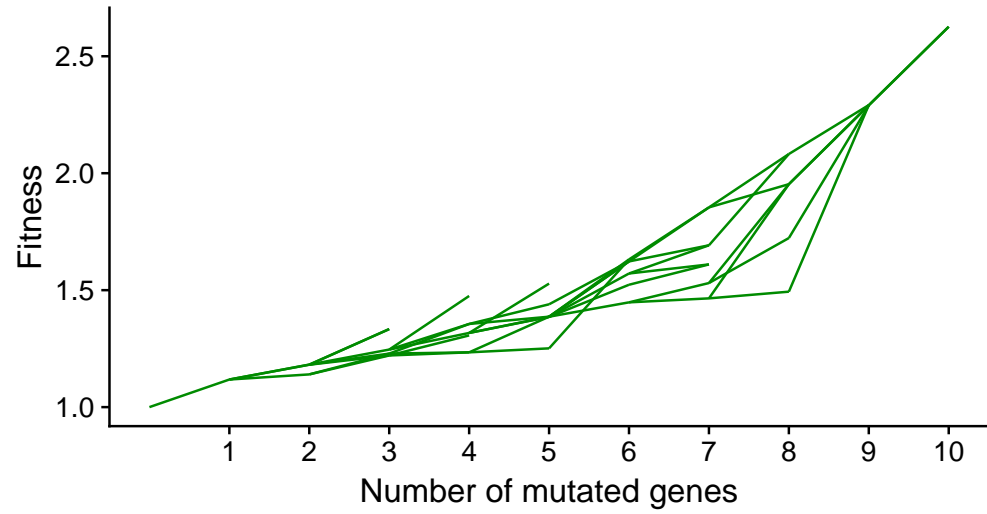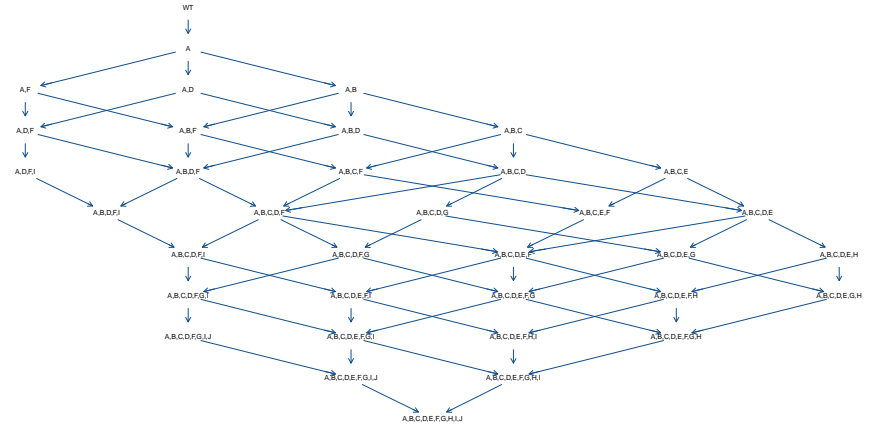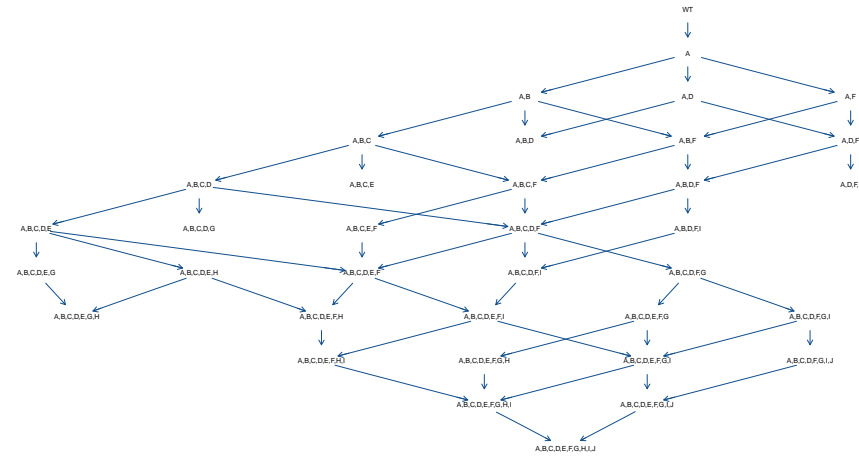

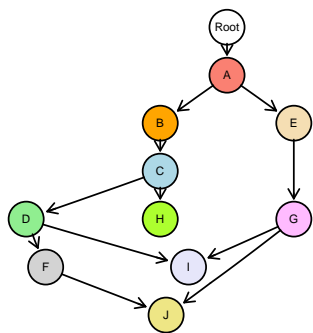

ID [R4ZN7nnB4ujxYI9L](#)  
 acc genotypes **33**  
 peaks no back 5  
 removed edges 8  
 prop rem edges 0.133

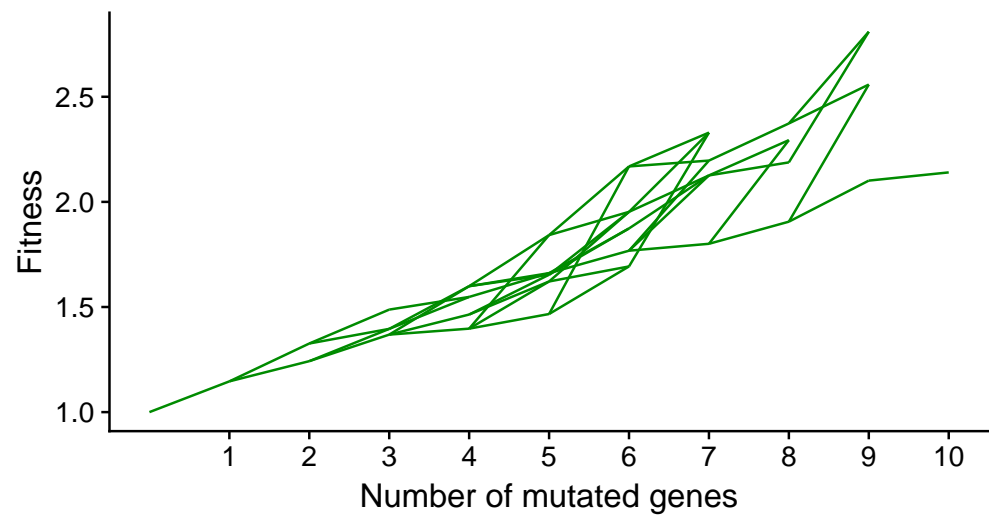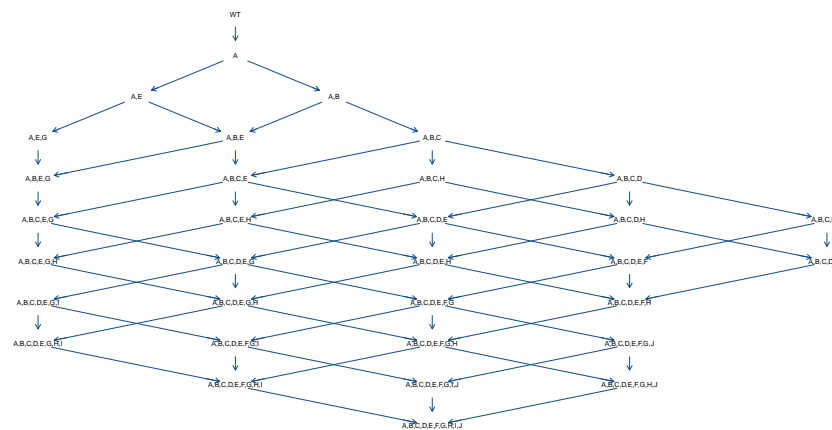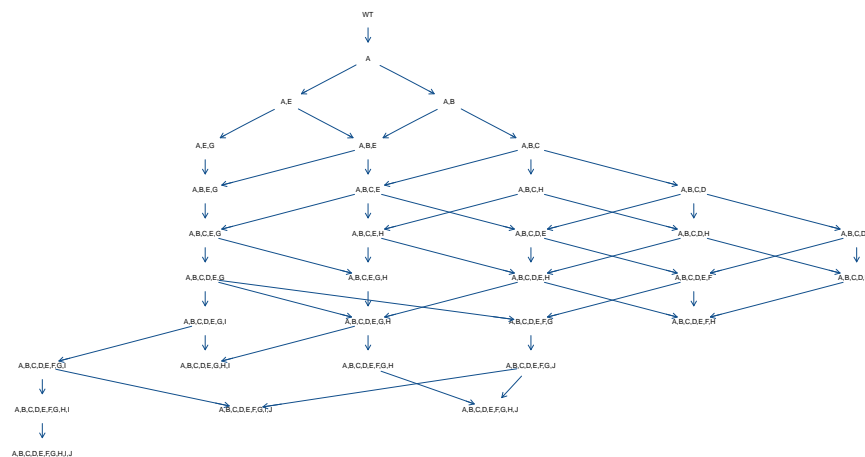

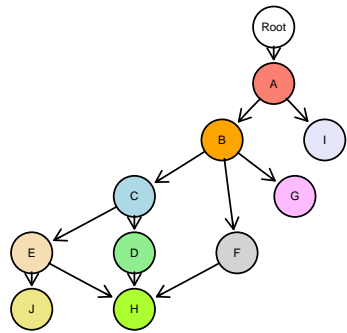

ID **R5Ulg5w7GGy7xUcV**  
 acc genotypes **67**  
 peaks no back **8**  
 removed edges **36**  
 prop rem edges **0.209**

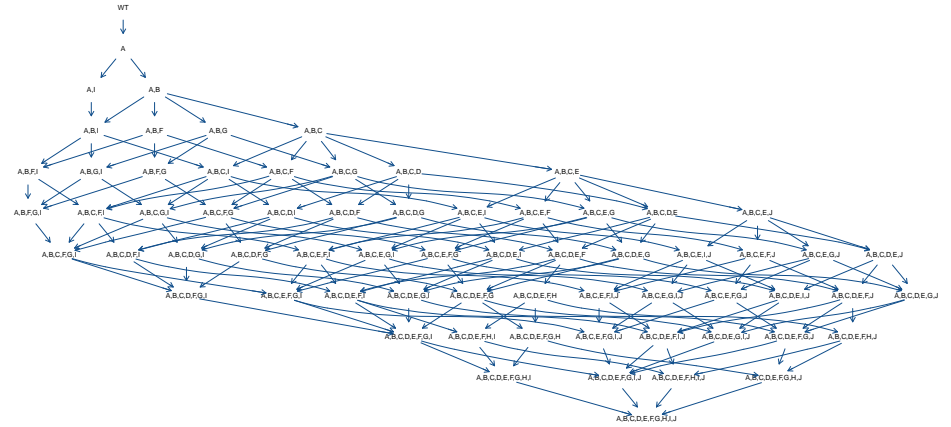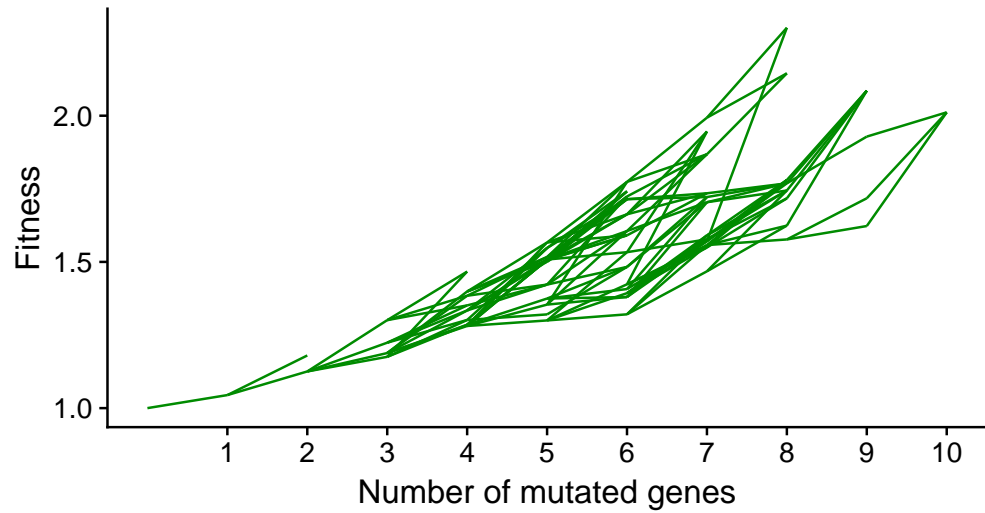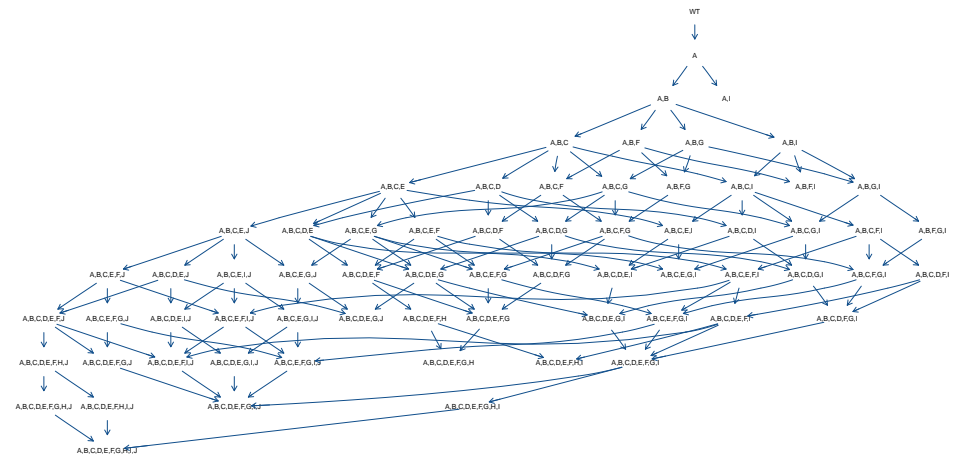

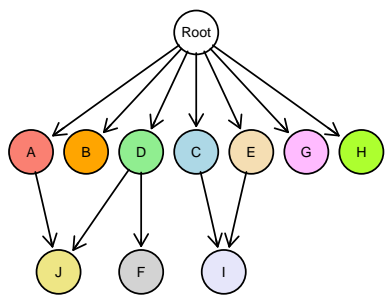

ID **RcLGnMwFAV7yHcPX**  
 acc genotypes **320**  
 peaks no back **19**  
 removed edges **237**  
 prop rem edges **0.198**

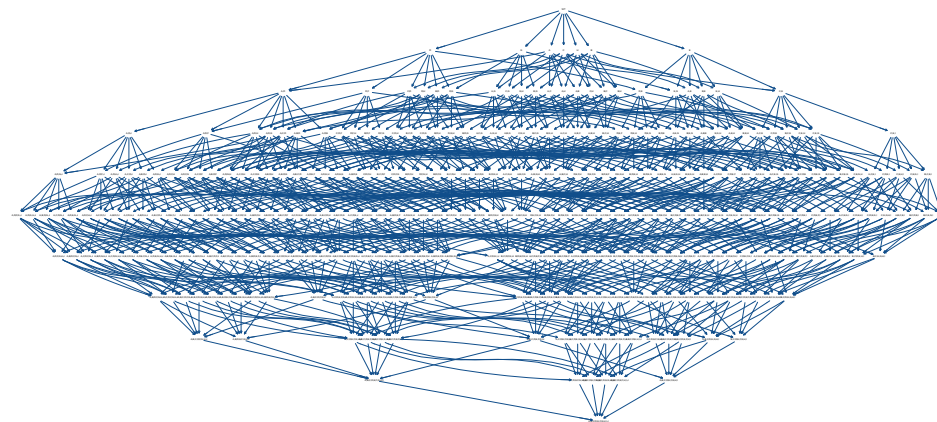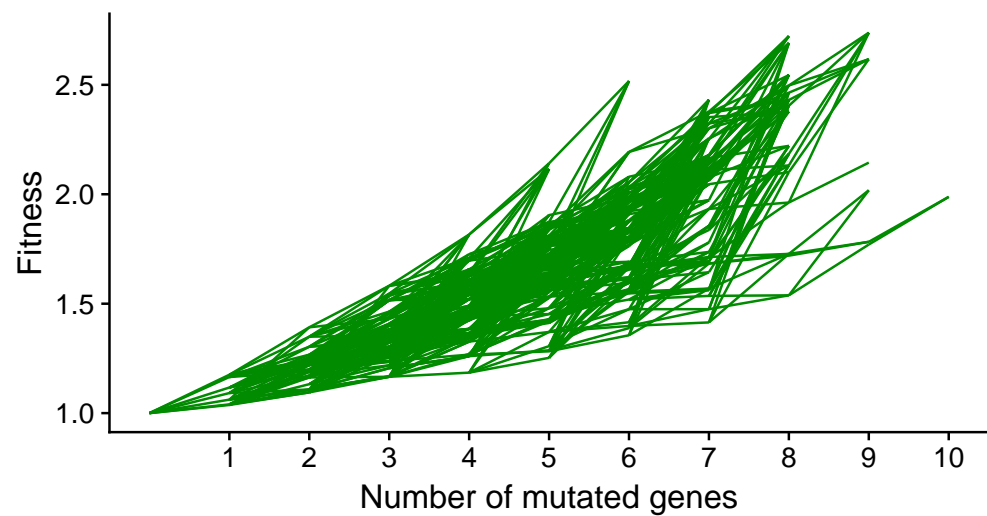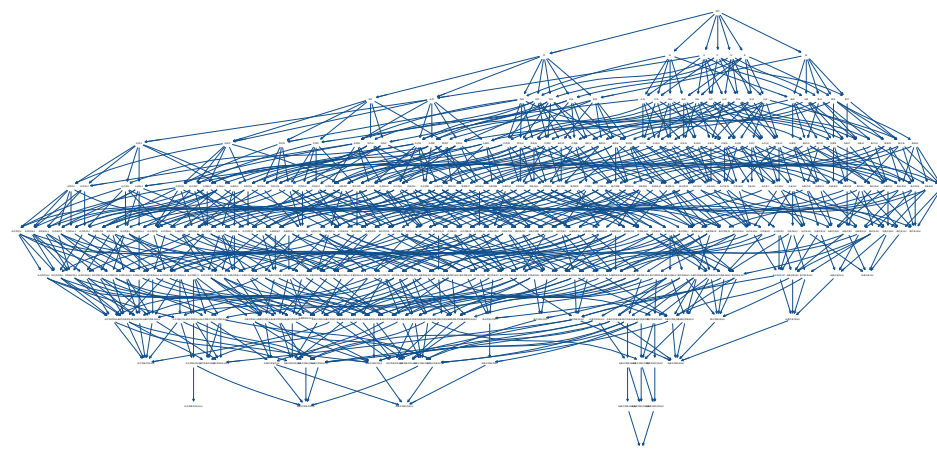

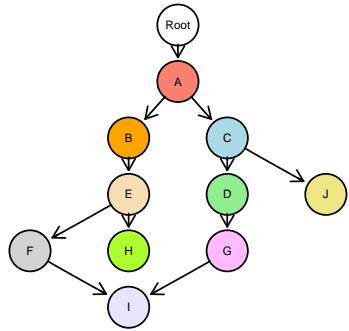

ID **RMPsjUicmruvxvFMT**  
 acc genotypes **47**  
 peaks no back **8**  
 removed edges **22**  
 prop rem edges **0.222**

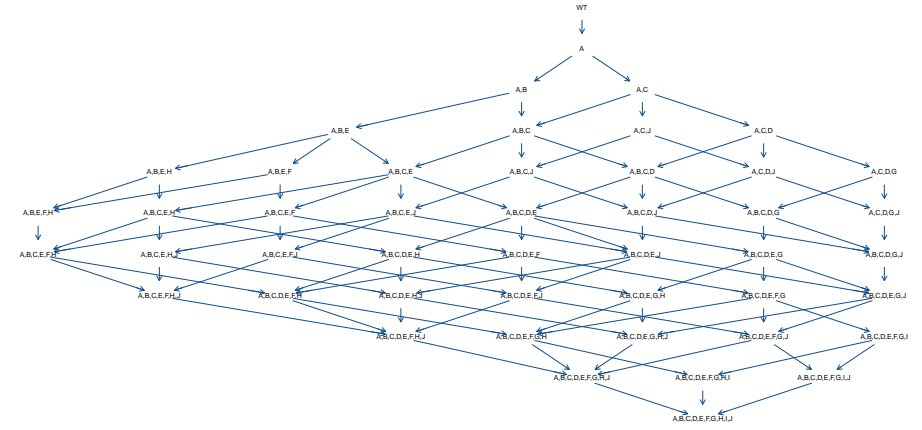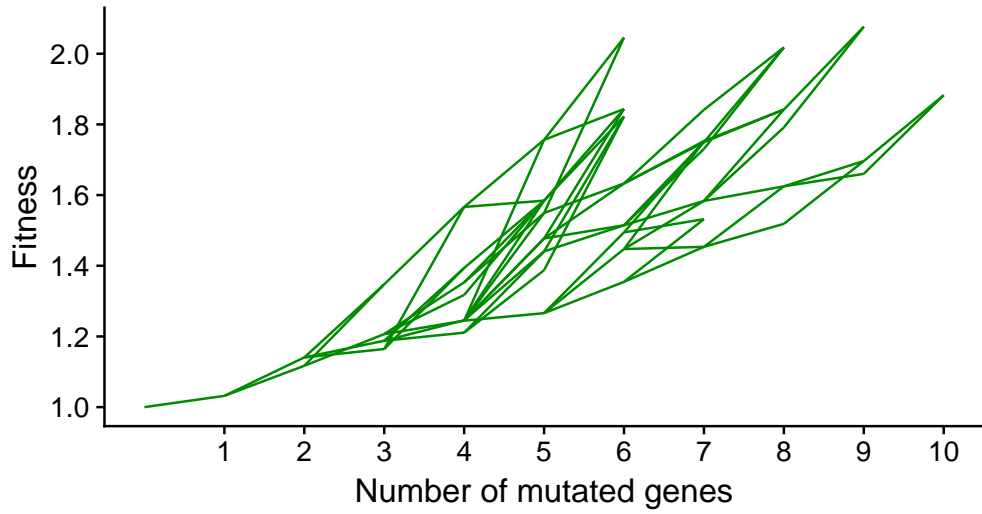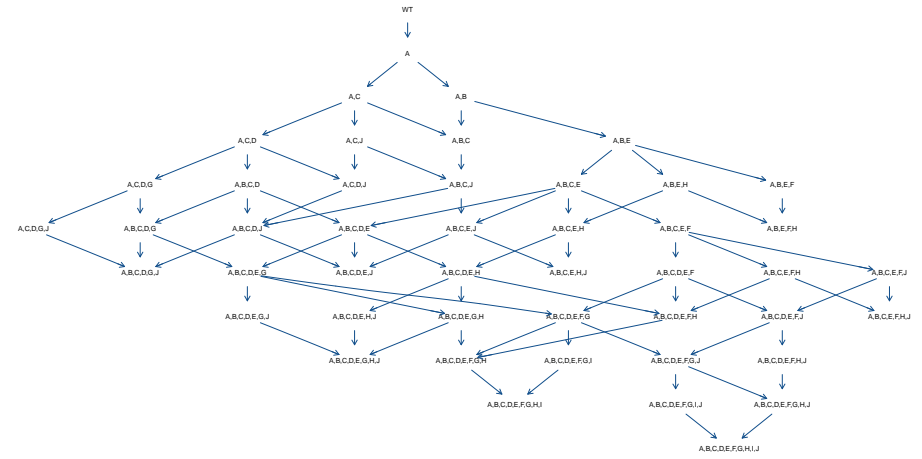



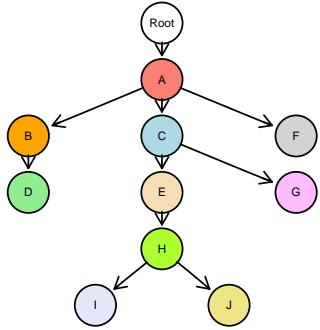

ID **rRQ3Bws3107fO7mHM**  
 acc genotypes **79**  
 peaks no back **11**  
 removed edges **41**  
 prop rem edges **0.199**

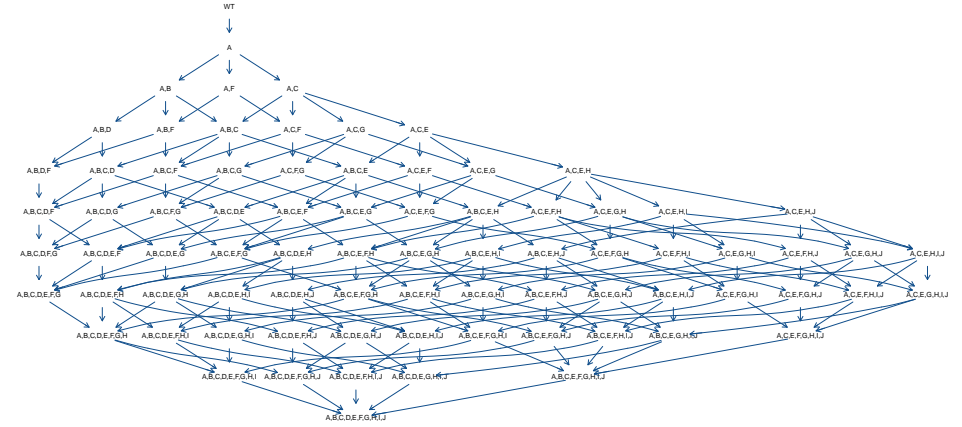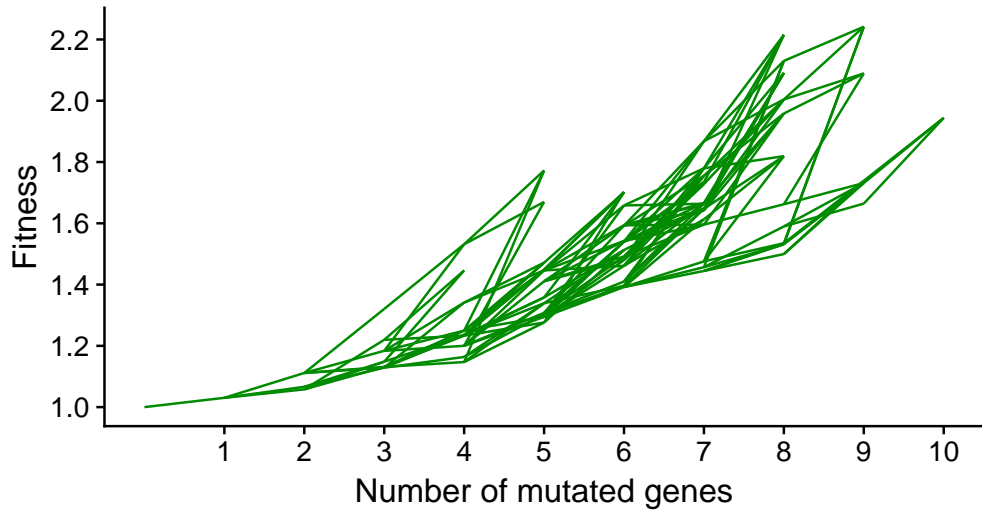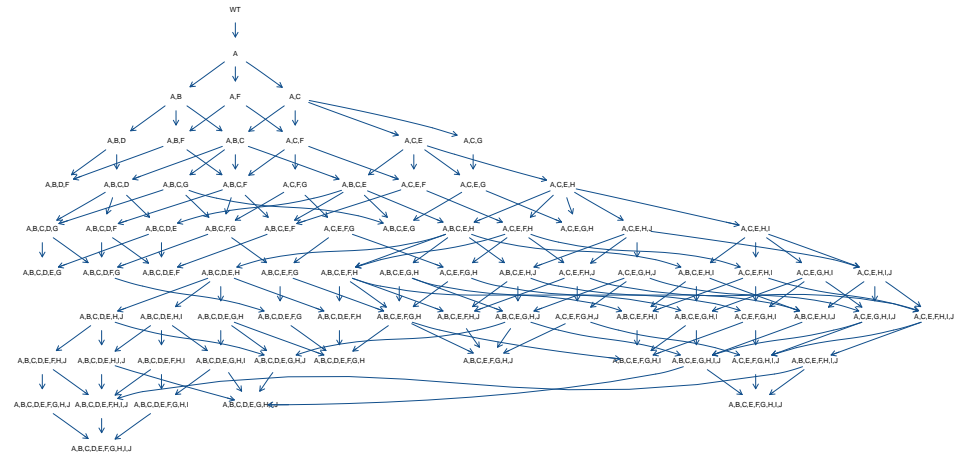

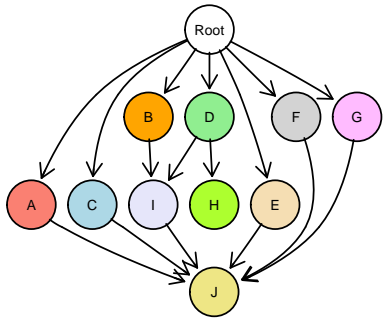

ID **SArTeHv6MV7tVCry**  
 acc genotypes **258**  
 peaks no back 16  
 removed edges 161  
 prop rem edges 0.167

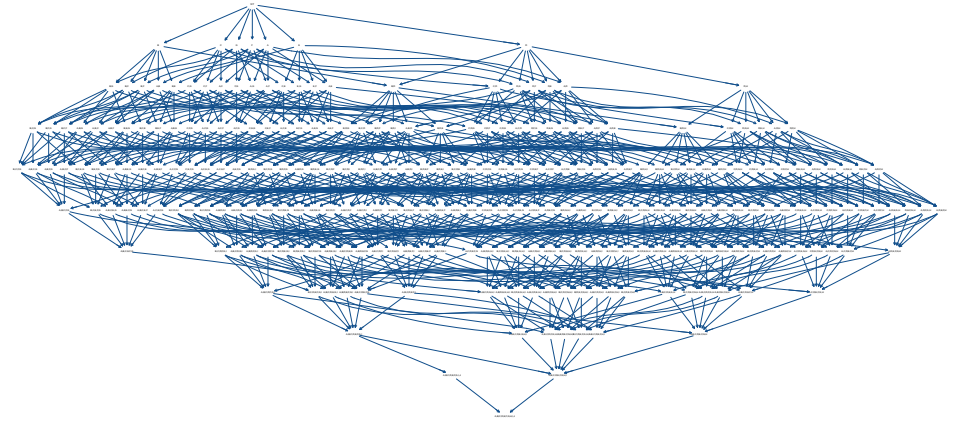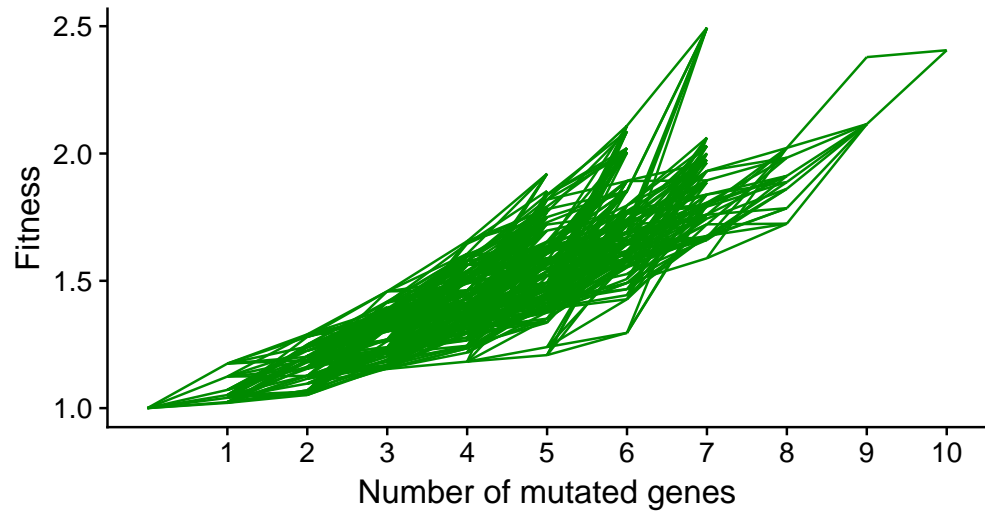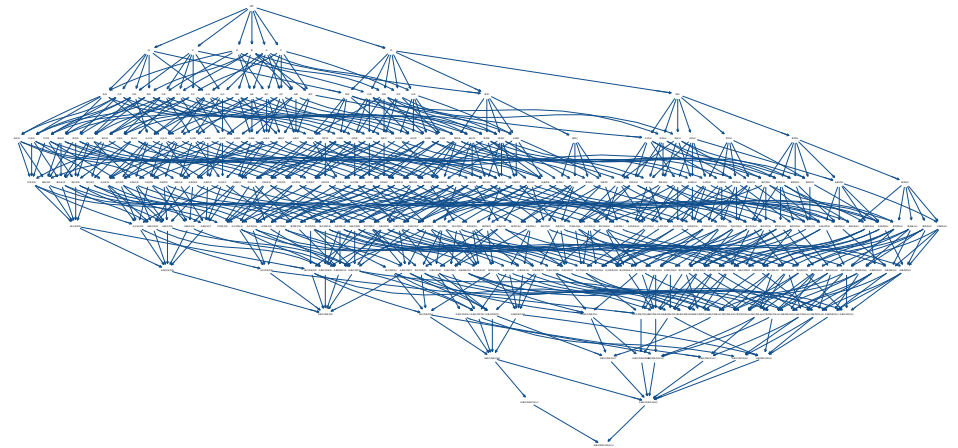

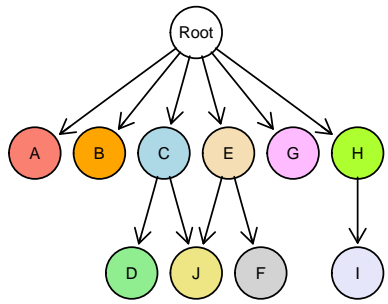

ID [SIYbZPVjDjsPd3OJ](#)  
acc genotypes 312  
peaks no back 21  
removed edges 259  
prop rem edges 0.224

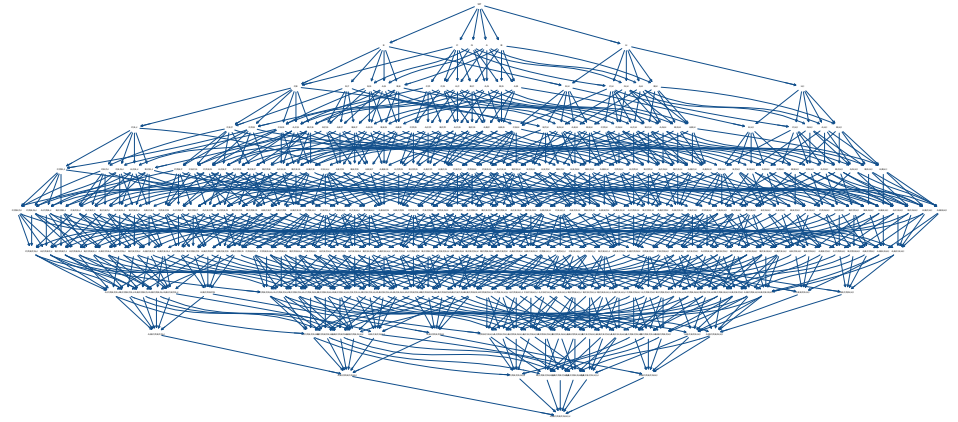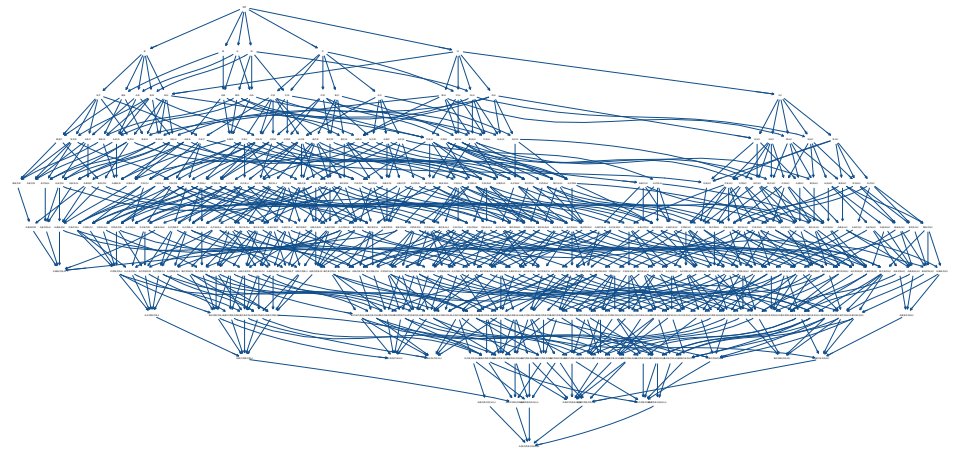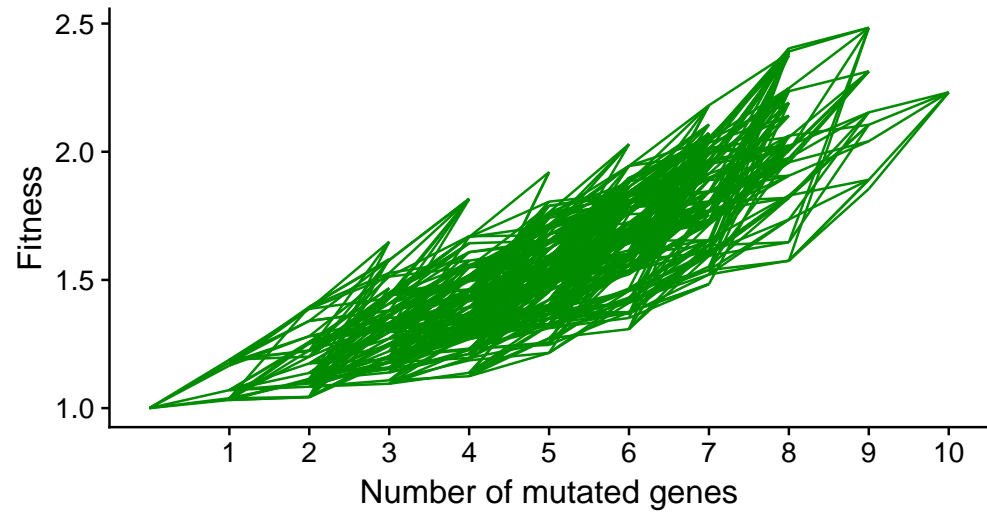

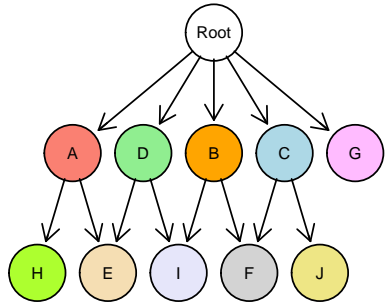

ID **smwY8F2IPkzSNFOb**  
 acc genotypes **178**  
 peaks no back **17**  
 removed edges **101**  
 prop rem edges **0.181**

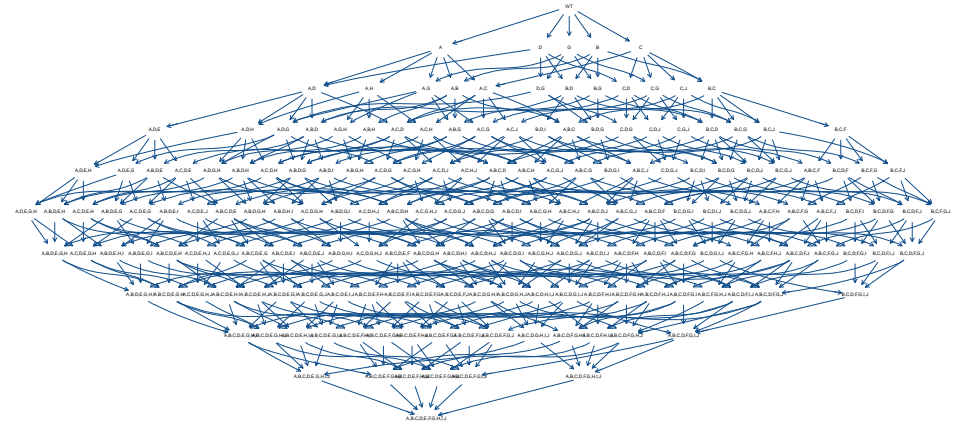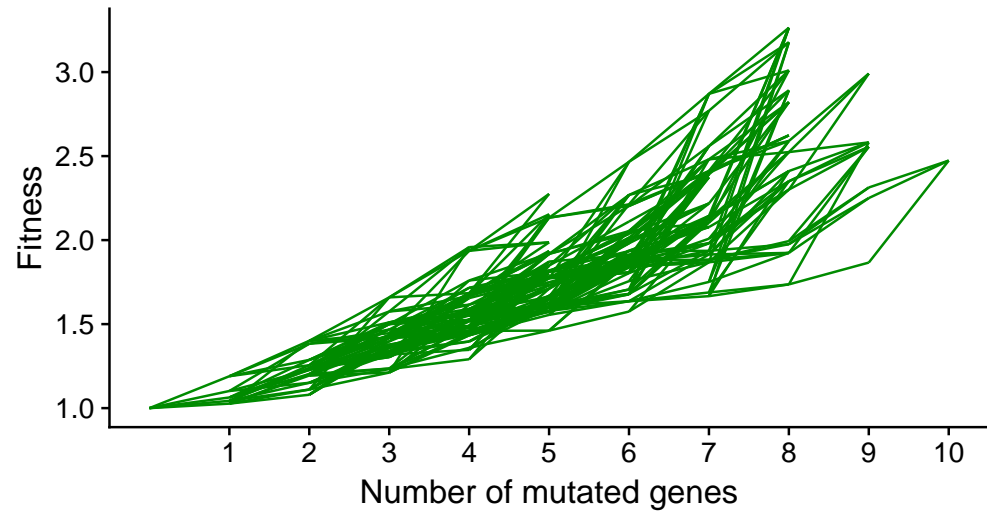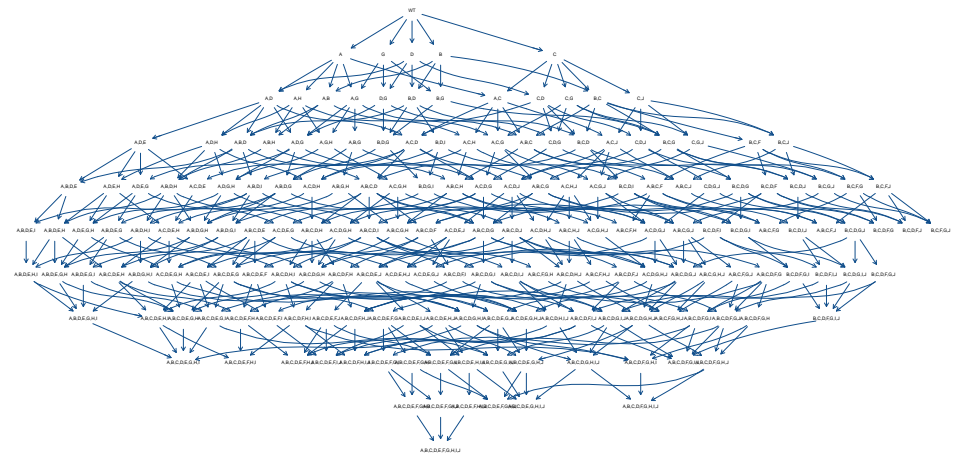

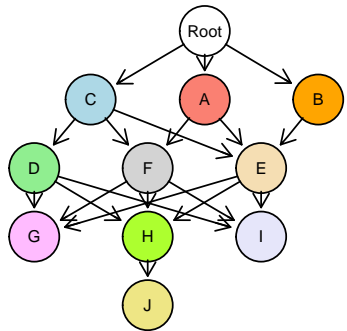

ID **sO7ye5yMrhvX10WZQ**  
 acc genotypes **31**  
 peaks no back 2  
 removed edges 2  
 prop rem edges 0.036

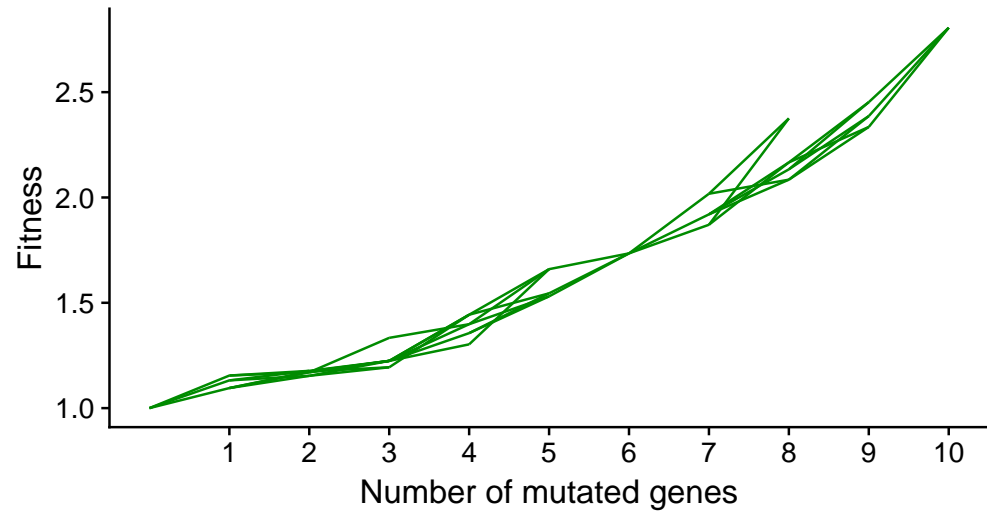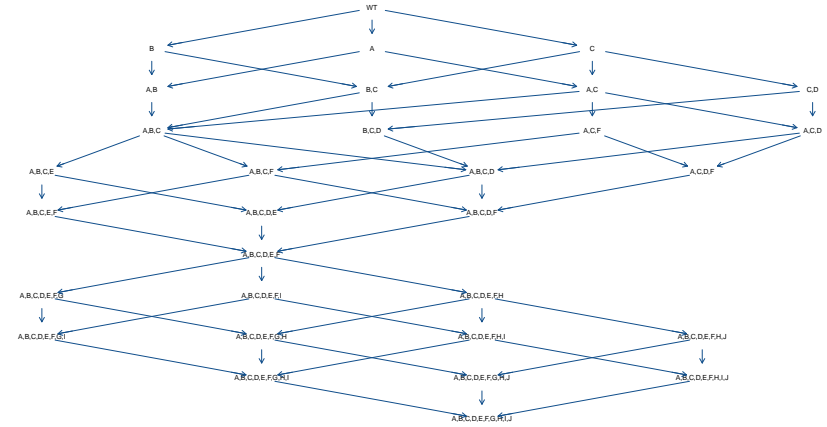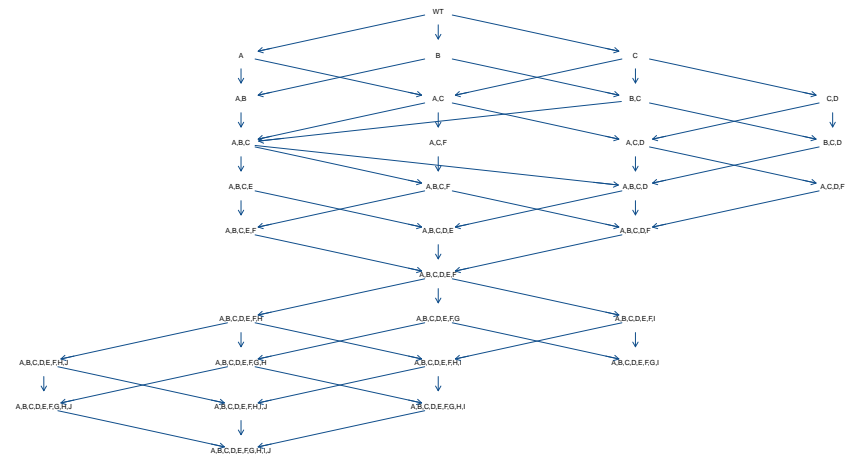

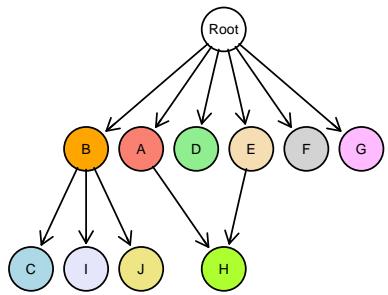

ID **sUe5FH9IUMDi10B**  
 acc genotypes **360**  
 peaks no back 23  
 removed edges 252  
 prop rem edges 0.177

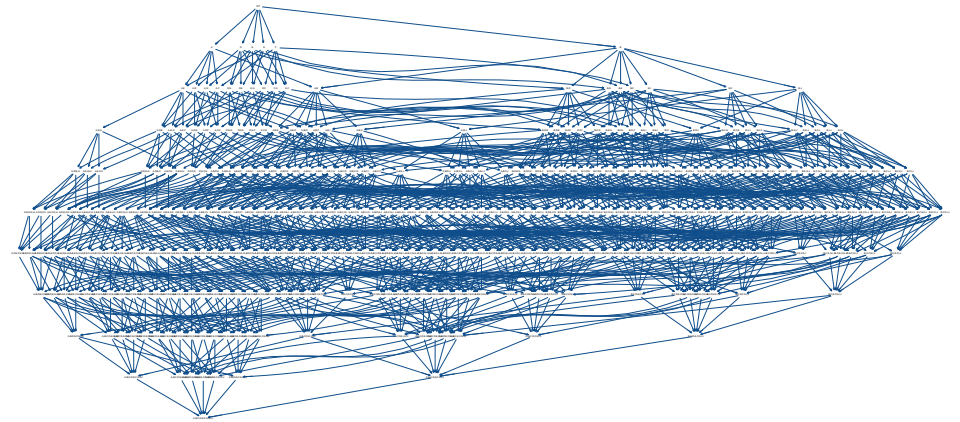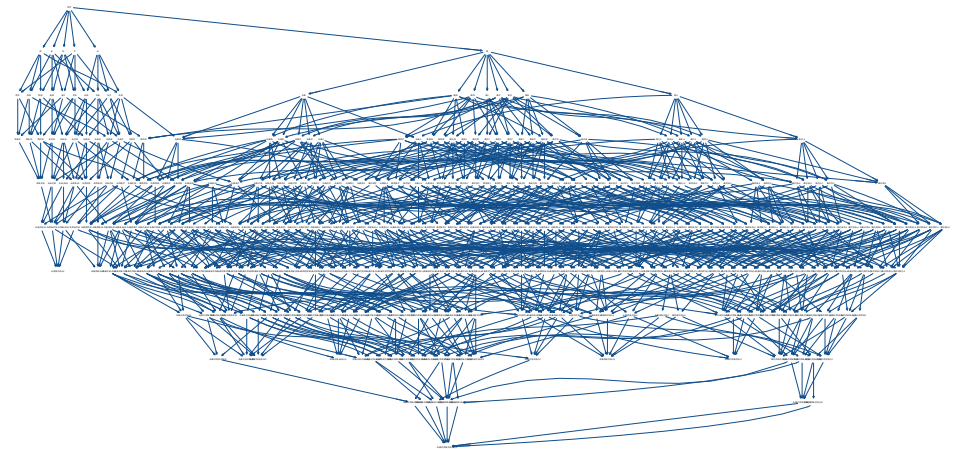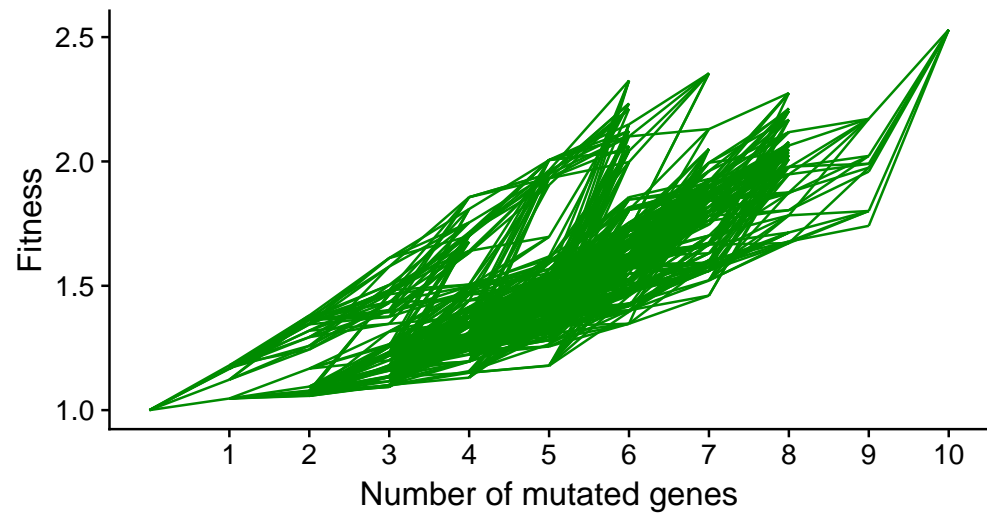

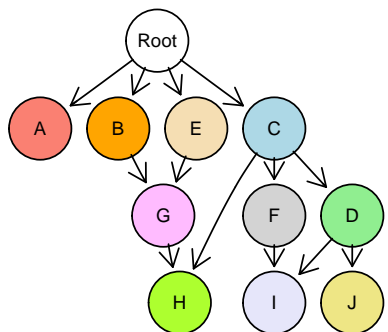

ID SWgUDoSpxMcdnnQM  
 acc genotypes 106  
 peaks no back 12  
 removed edges 52  
 prop rem edges 0.18

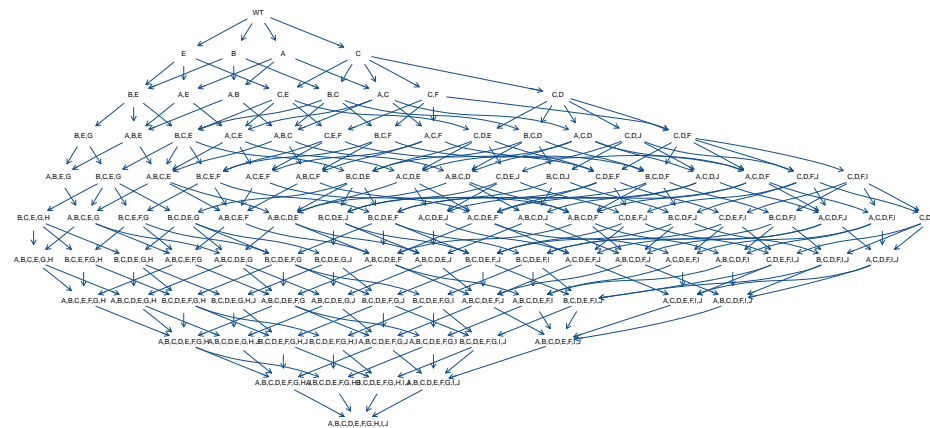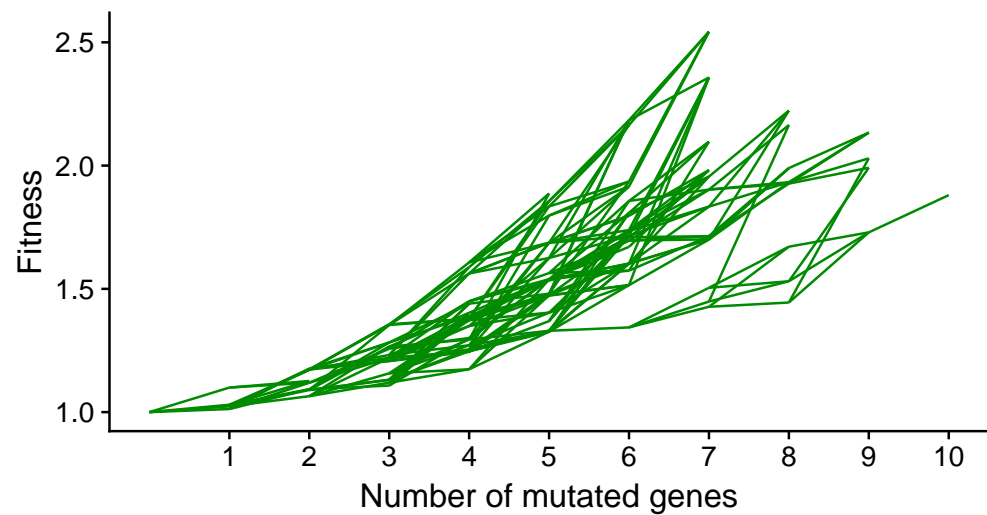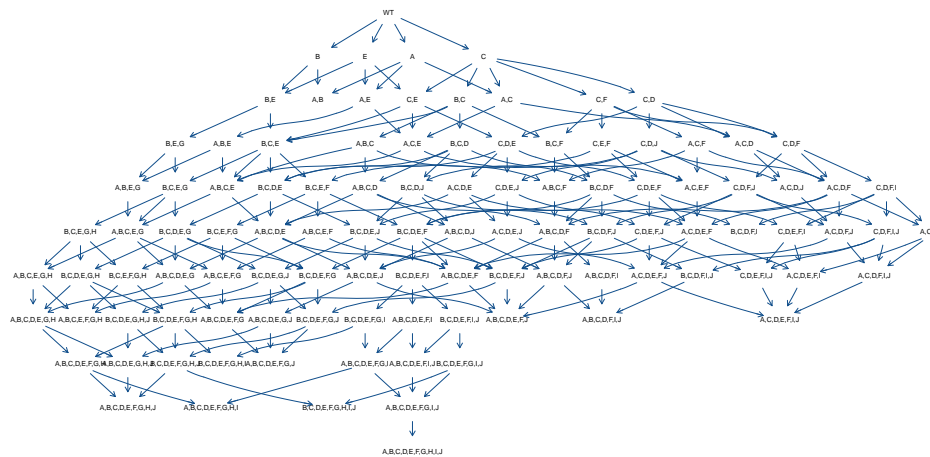

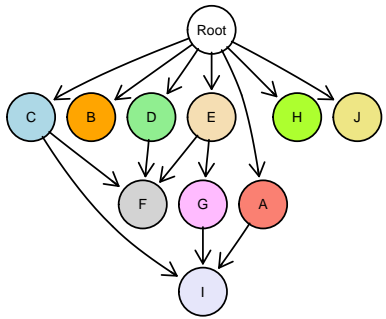

ID [sxE6qJHh512sjV9a](#)  
 acc genotypes 248  
 peaks no back 16  
 removed edges 163  
 prop rem edges 0.183

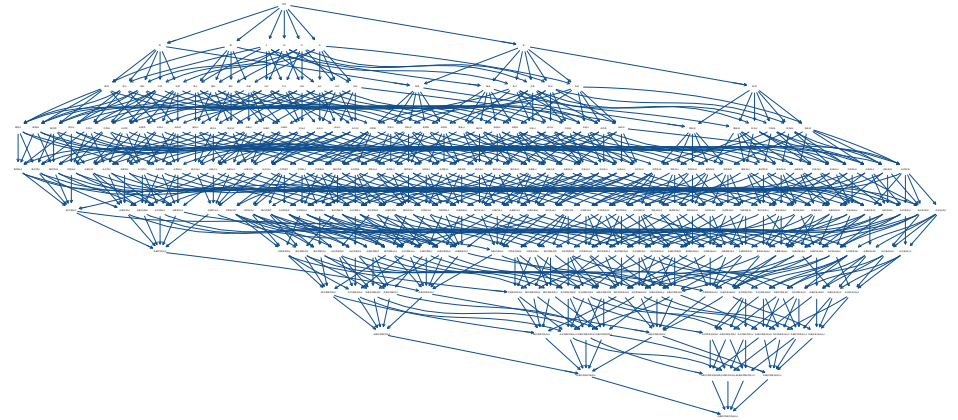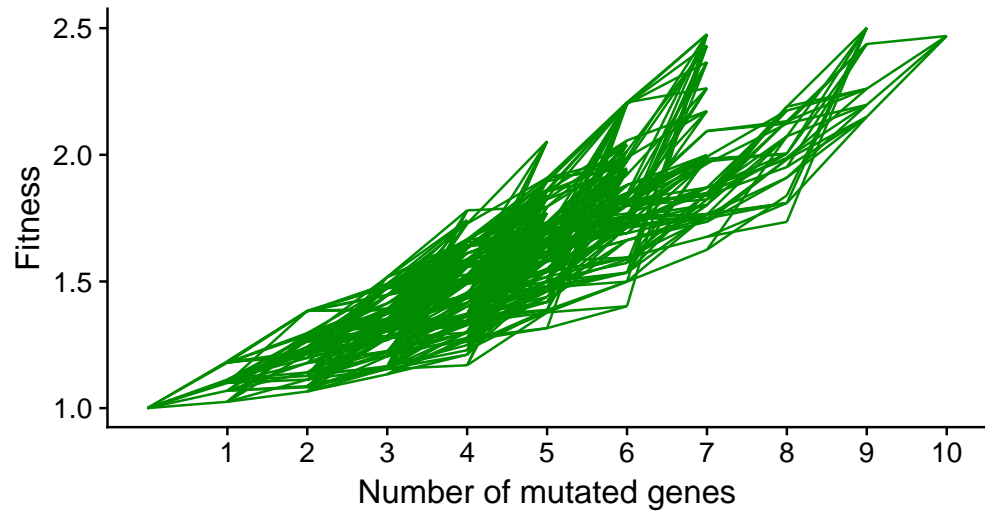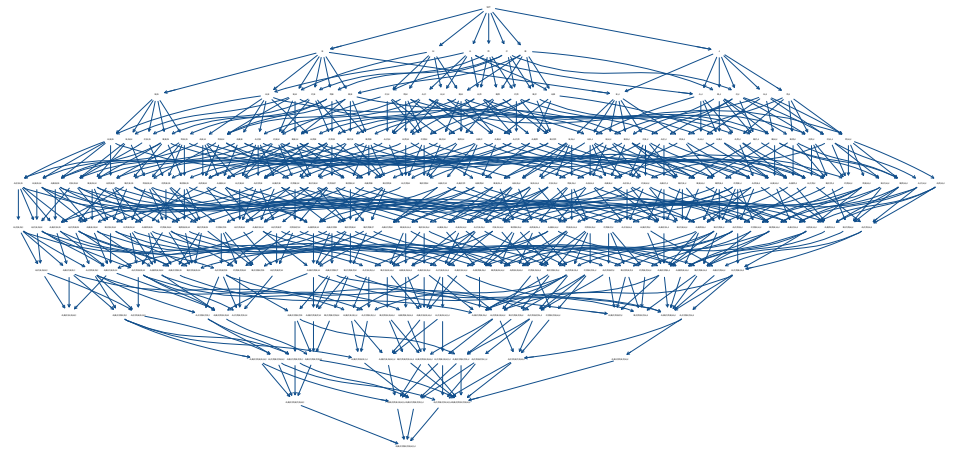



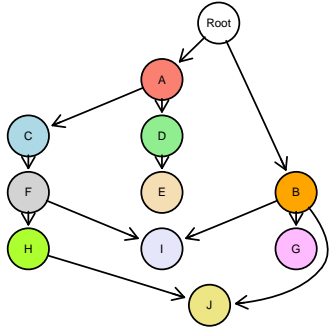

ID **t10jgW9R9zZrcAqjl**  
 acc genotypes **63**  
 peaks no back **12**  
 removed edges **30**  
 prop rem edges **0.208**

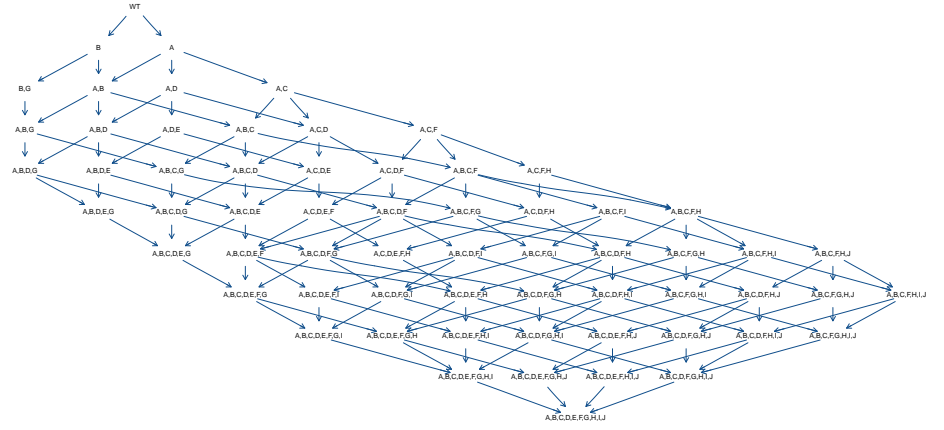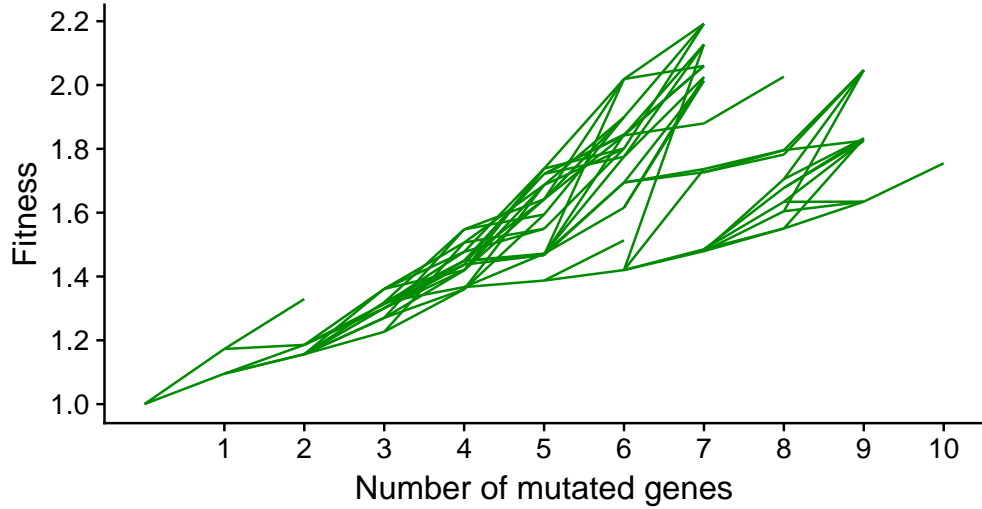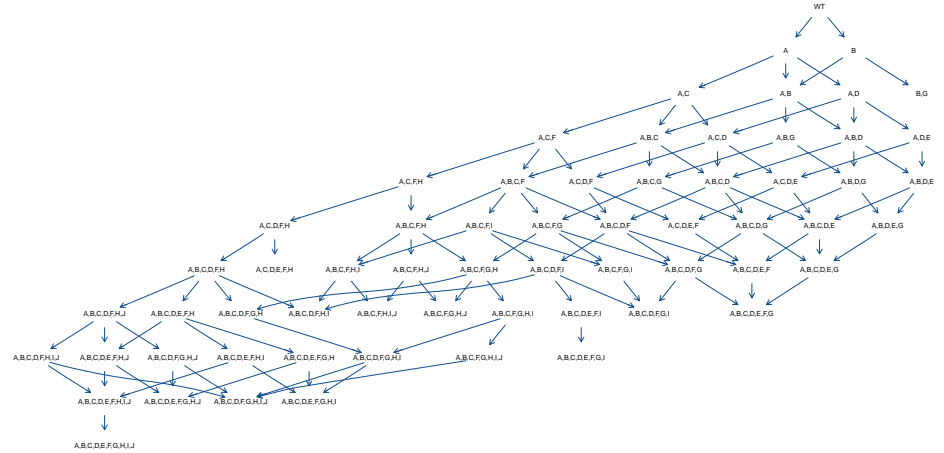

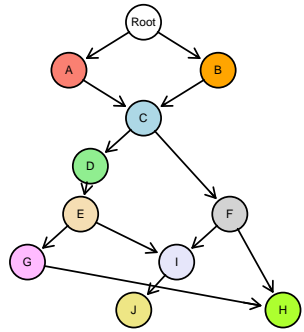

ID [t1yUXsv5fVuo10GRi](#)  
 acc genotypes 19  
 peaks no back 2  
 removed edges 2  
 prop rem edges 0.077

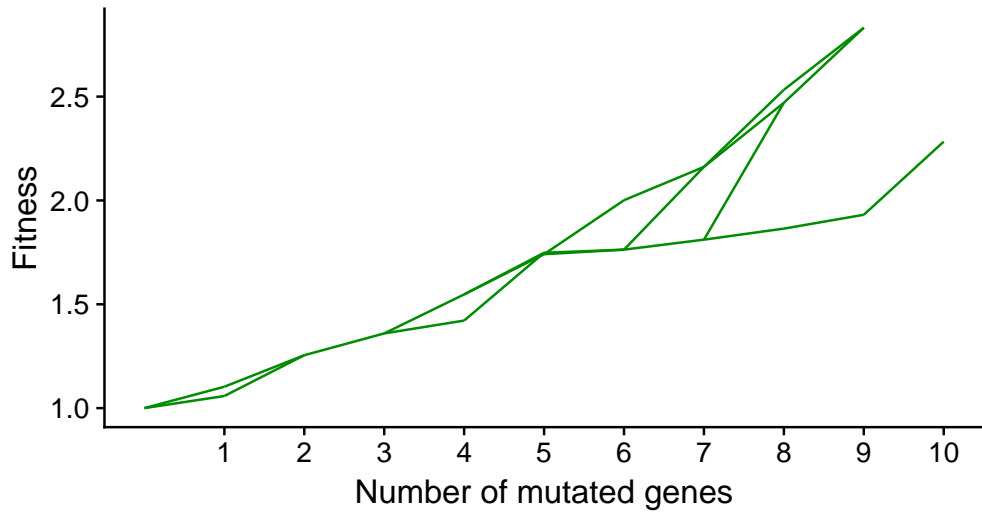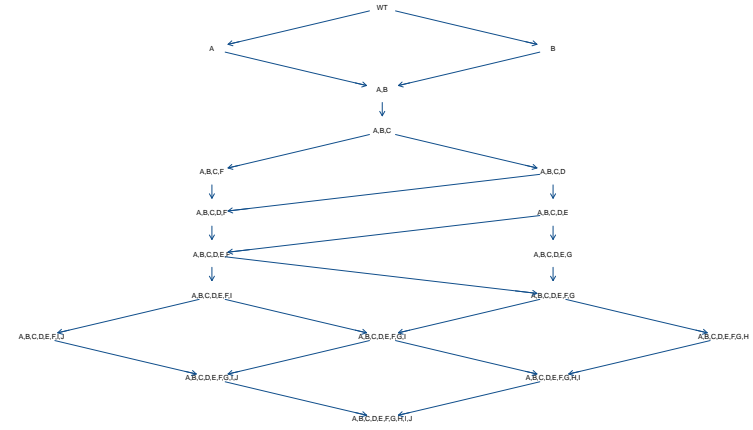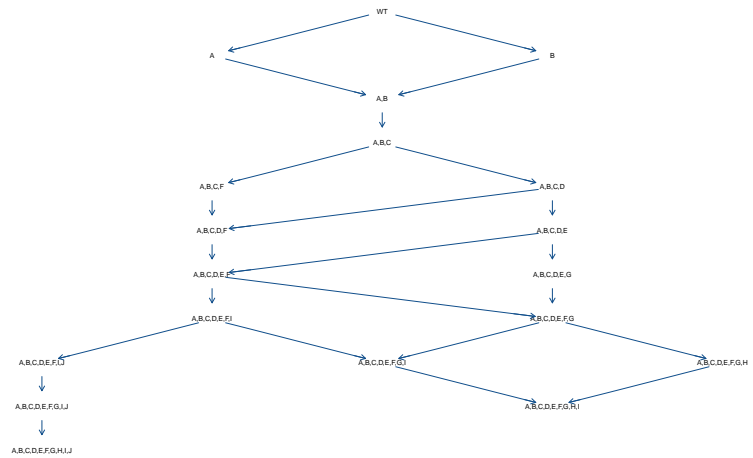

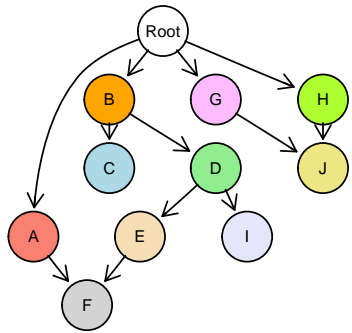

ID **tBuq3Z94BsQjawuL**  
 acc genotypes **130**  
 peaks no back **14**  
 removed edges **92**  
 prop rem edges **0.239**

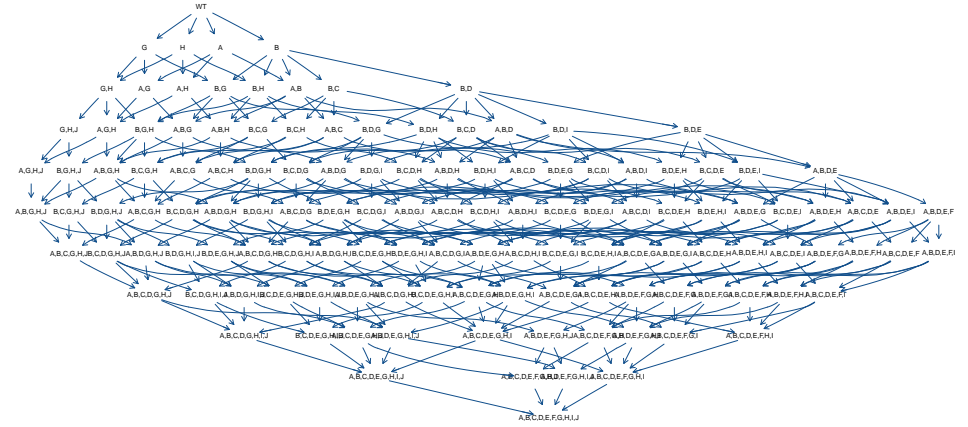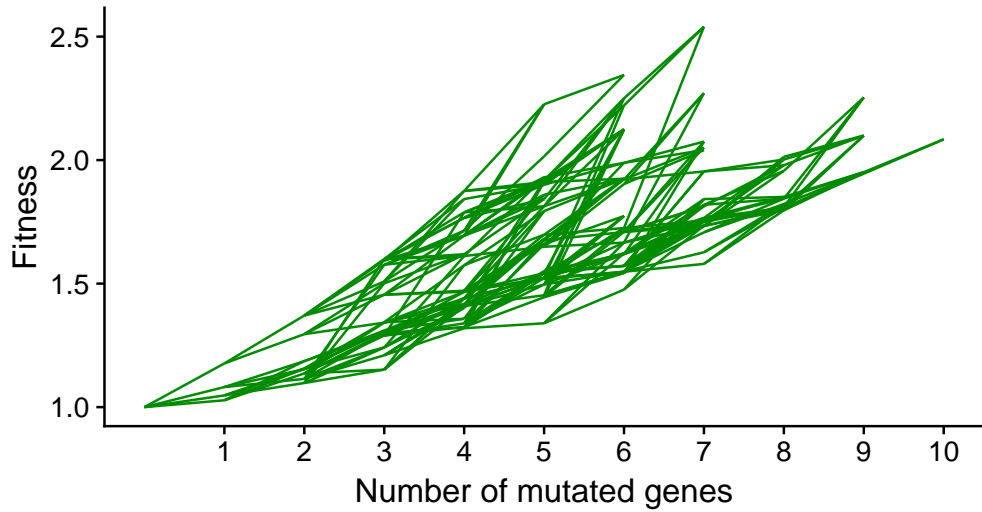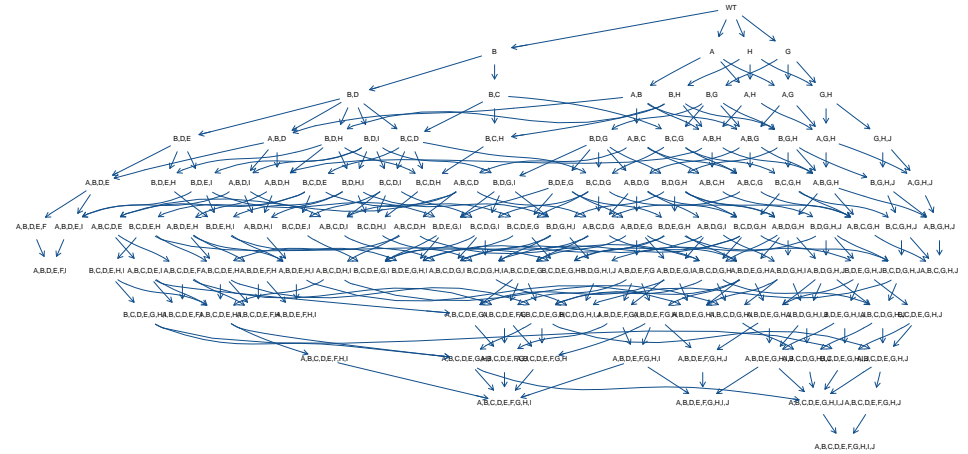

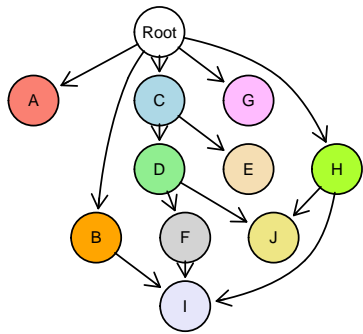

ID **tGIKPZvUbRWHgDHV**  
 acc genotypes **160**  
 peaks no back **16**  
 removed edges **89**  
 prop rem edges **0.174**

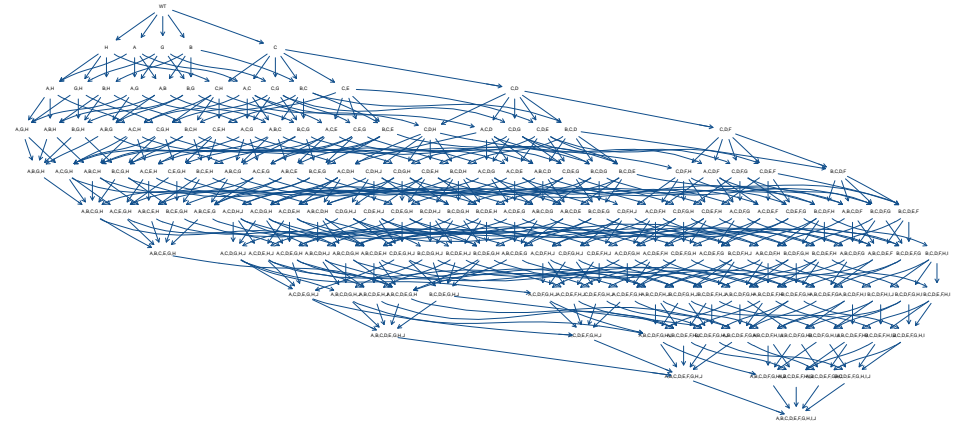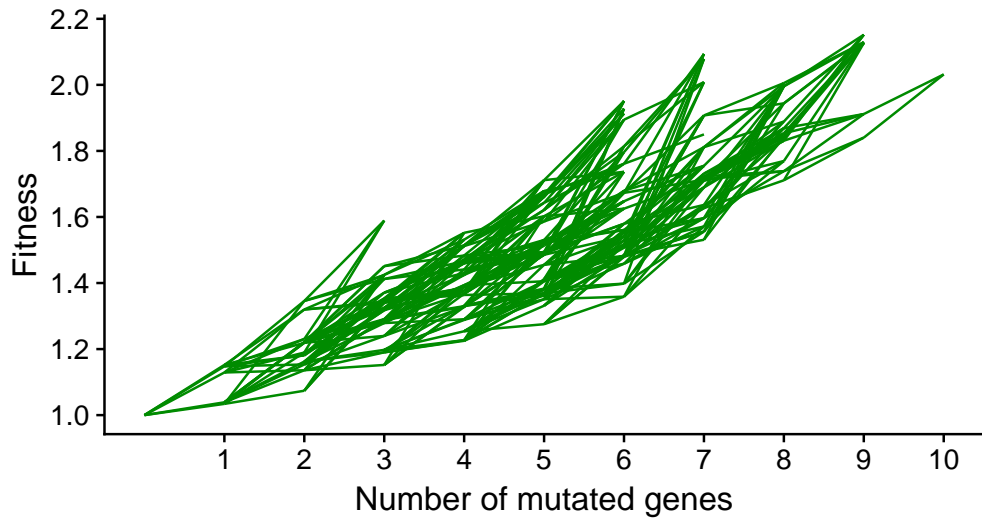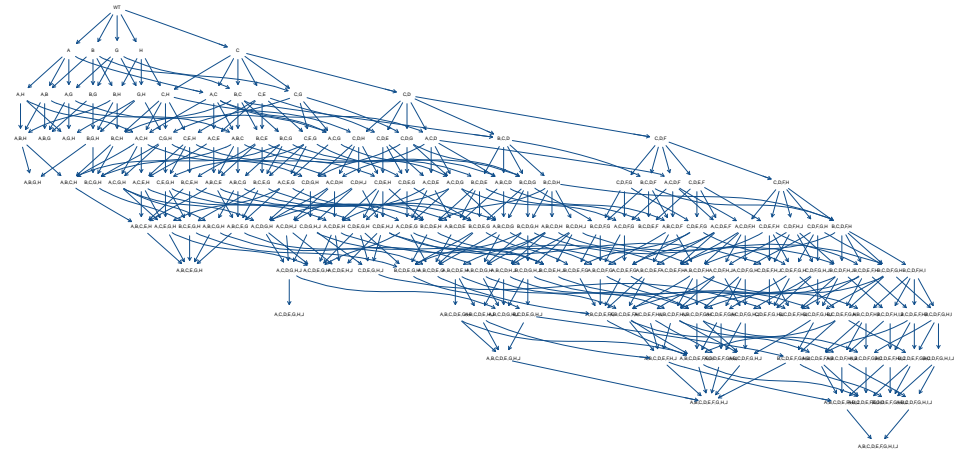

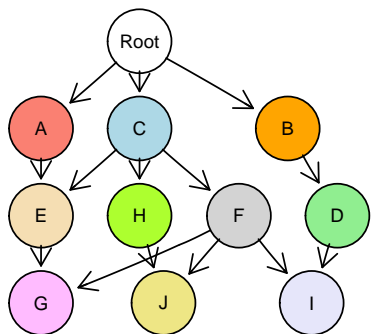

ID **TGzeGSf7DK4OTwG2**  
 acc genotypes **72**  
 peaks no back **8**  
 removed edges **32**  
 prop rem edges **0.19**

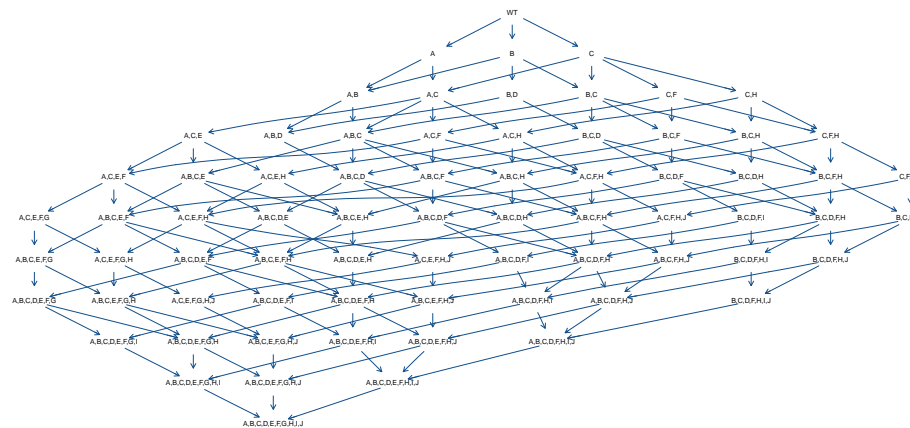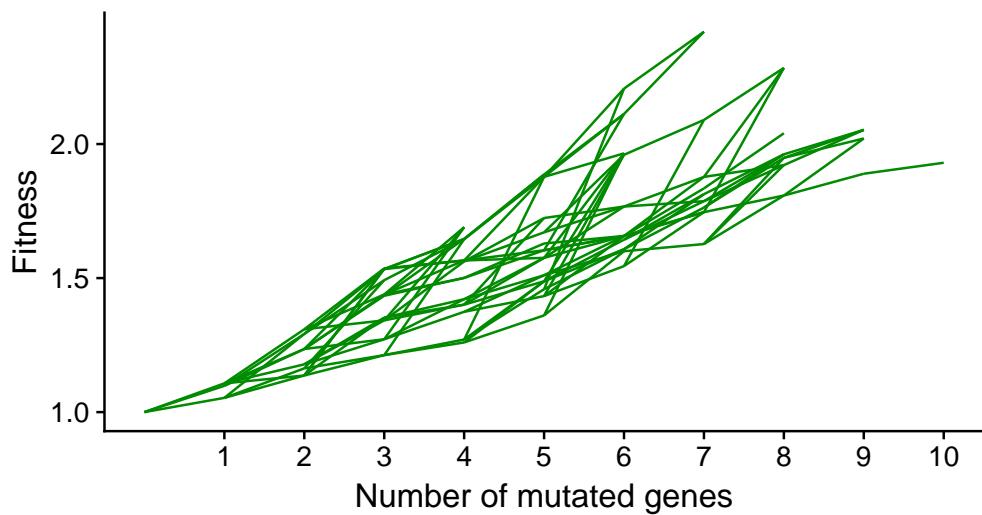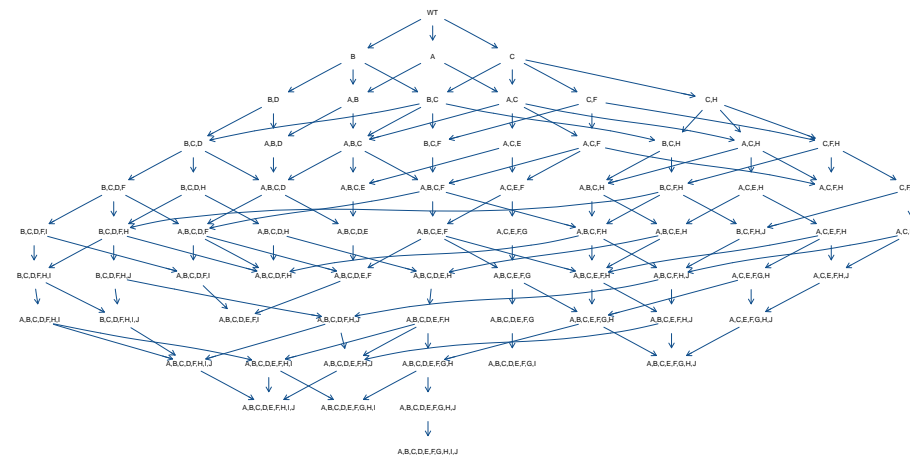

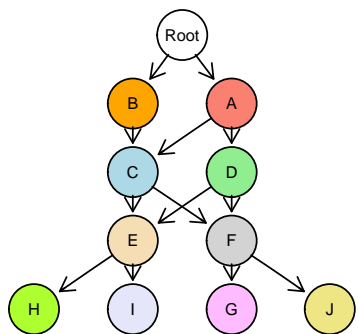

ID **t18GpDHXTWuBAEB4**  
 acc genotypes **32**  
 peaks no back **6**  
 removed edges **11**  
 prop rem edges **0.183**

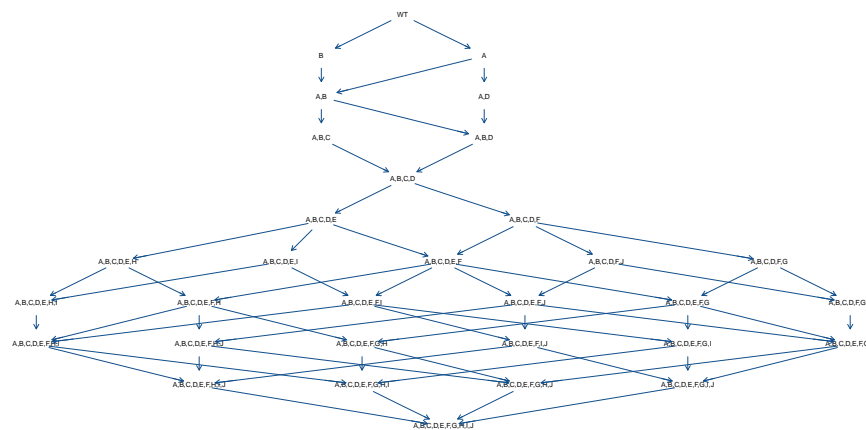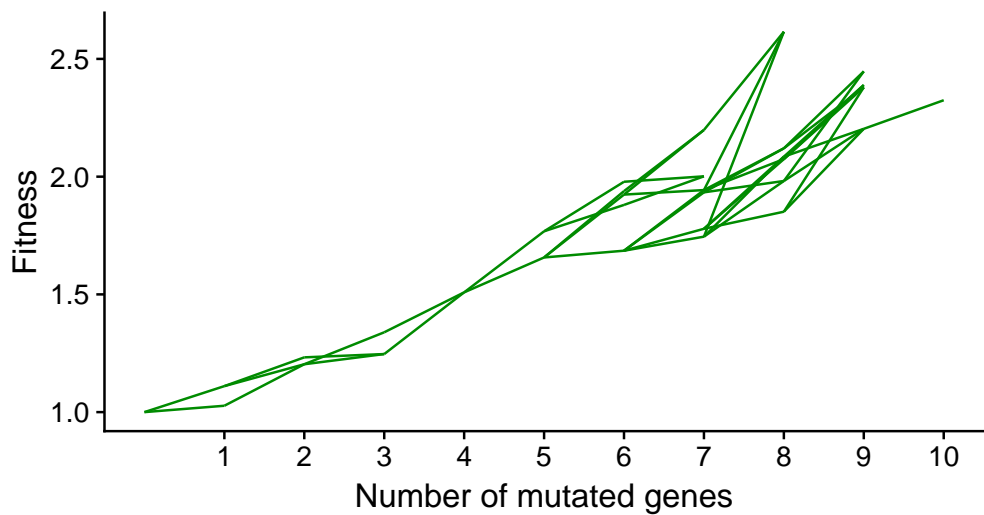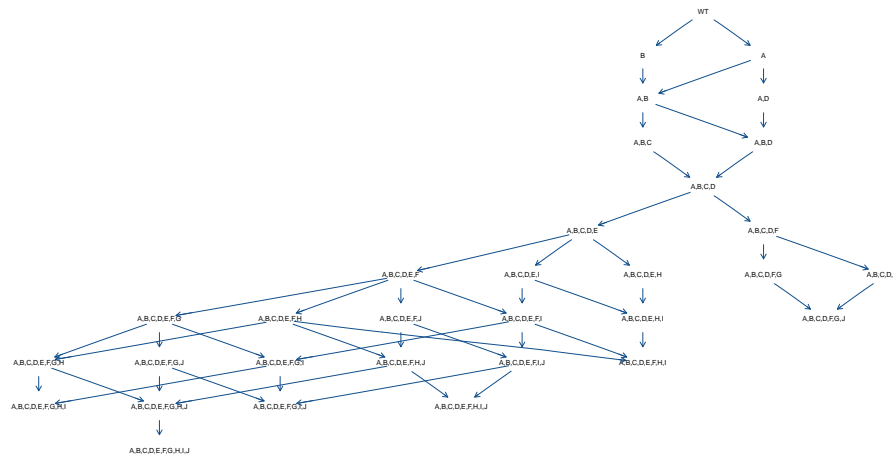

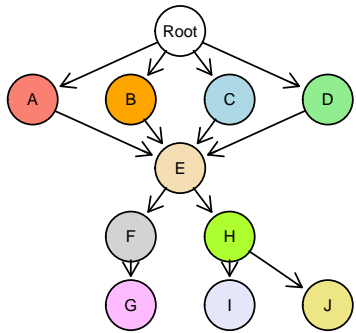

ID TnFE10L2B9qFy8hMT  
 acc genotypes 31  
 peaks no back 5  
 removed edges 8  
 prop rem edges 0.138

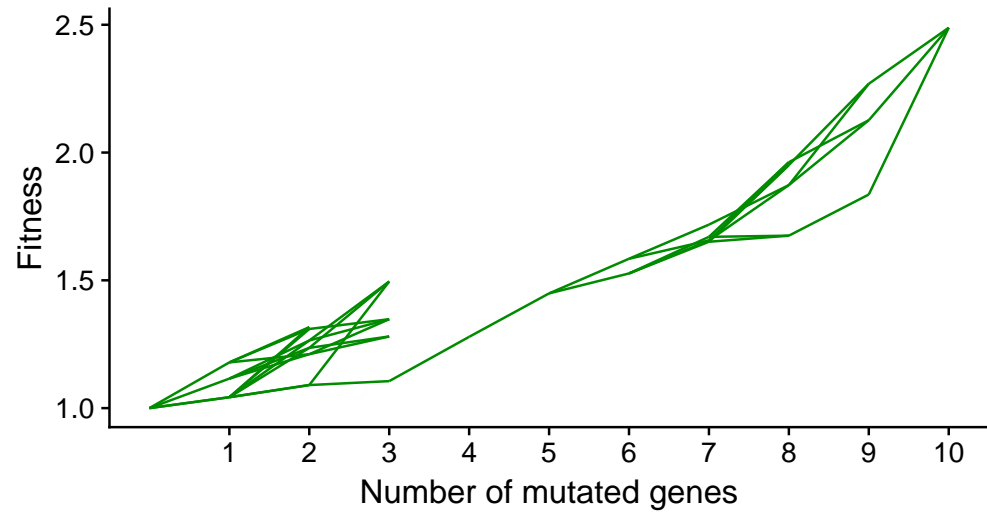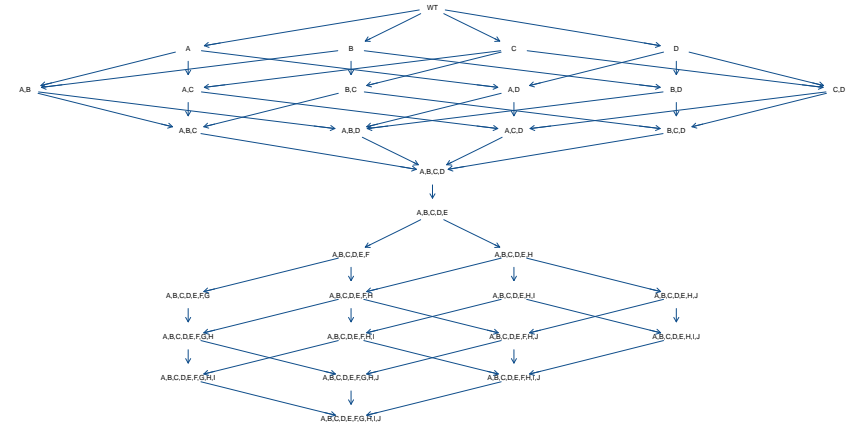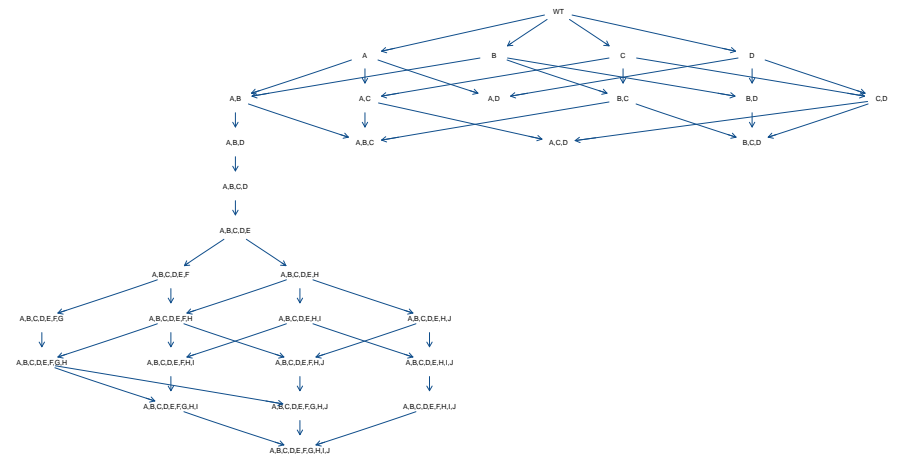

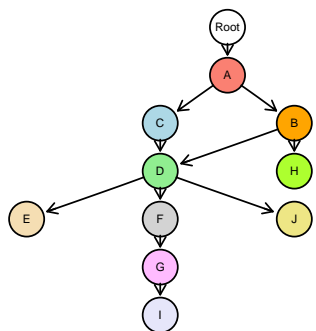

ID ToRaV610sJqVtMv2b  
 acc genotypes 39  
 peaks no back 7  
 removed edges 14  
 prop rem edges 0.171

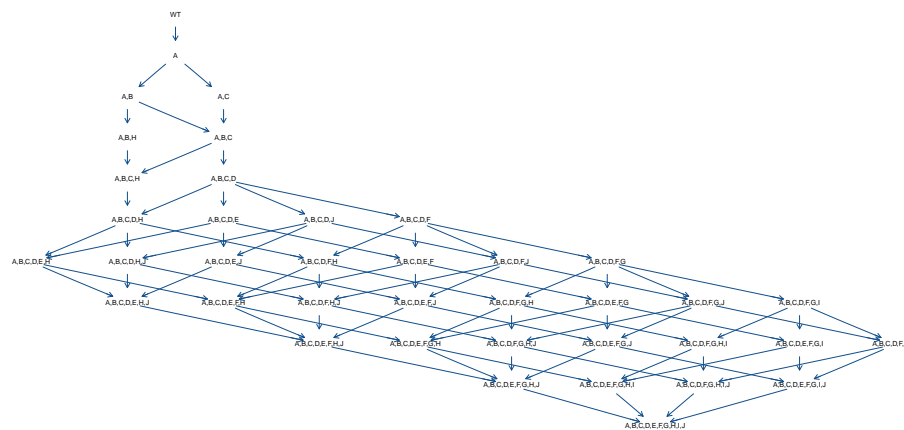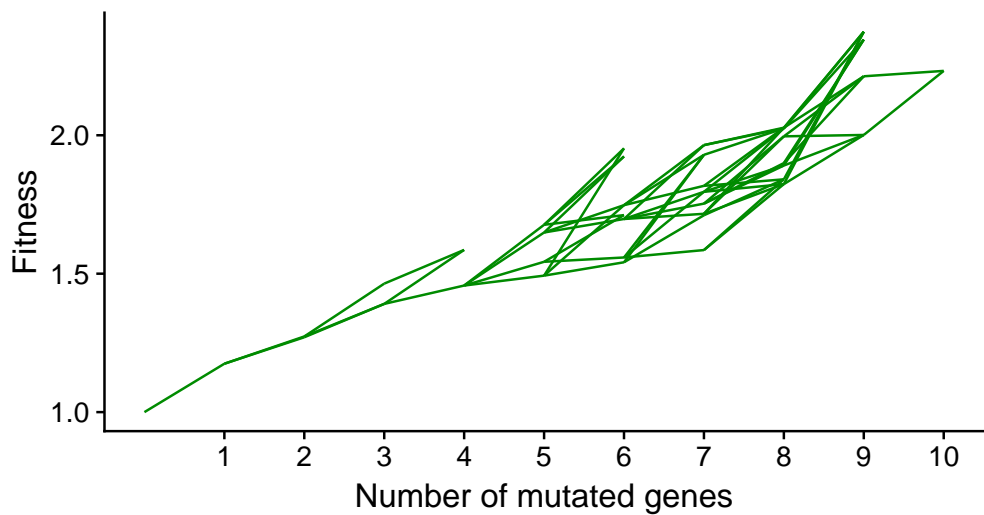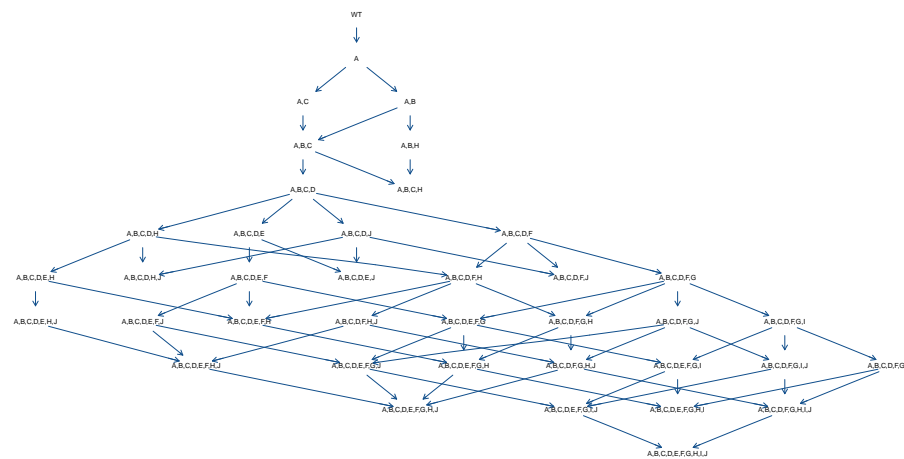



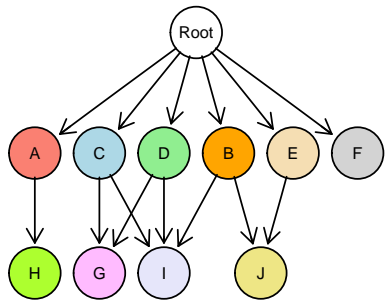

ID **TQnQiOlfxYRUpqU**  
 acc genotypes **186**  
 peaks no back **13**  
 removed edges **112**  
 prop rem edges **0.188**

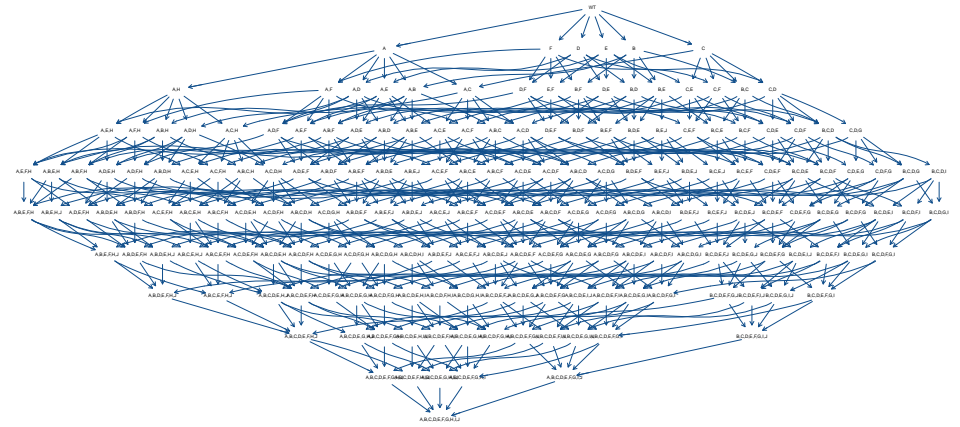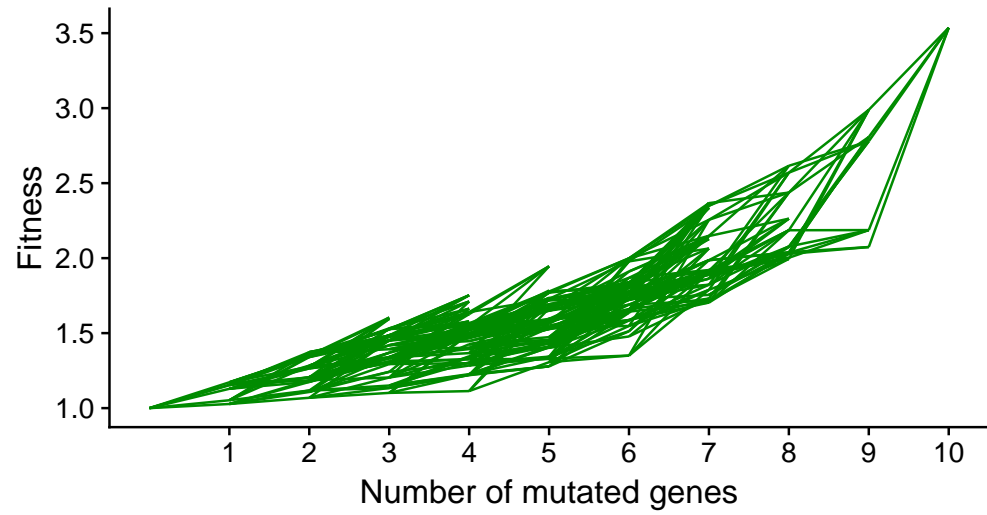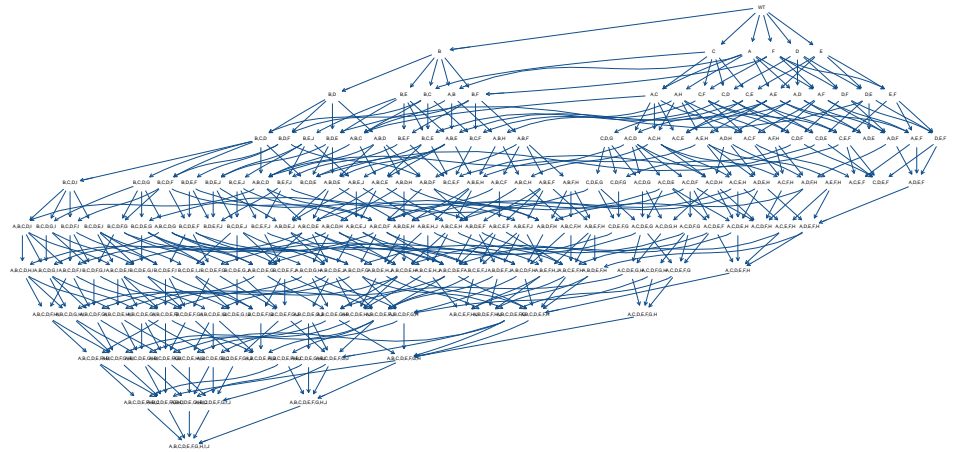

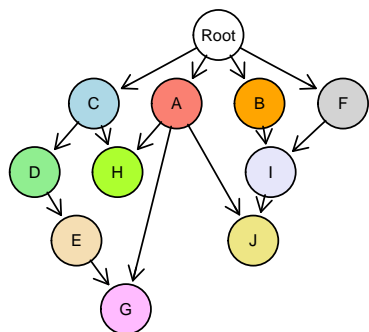

ID TVG98obaysdZVe7G  
 acc genotypes 74  
 peaks no back 8  
 removed edges 33  
 prop rem edges 0.189

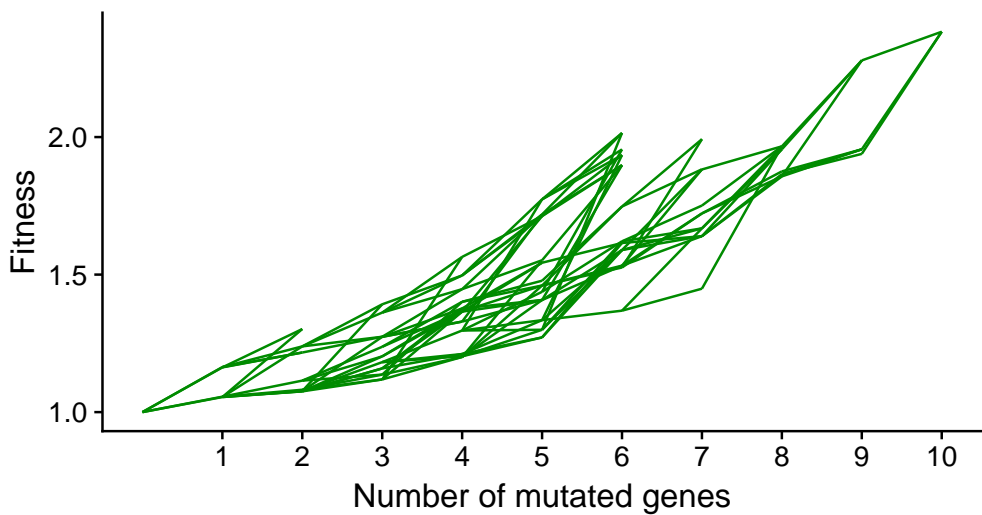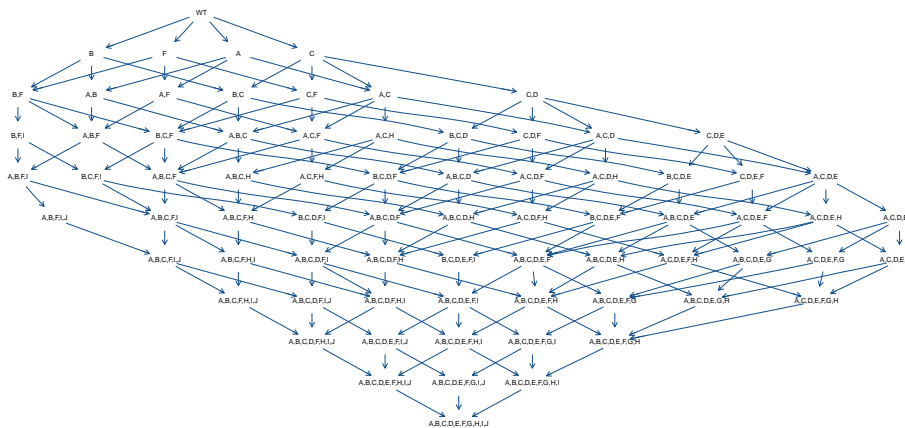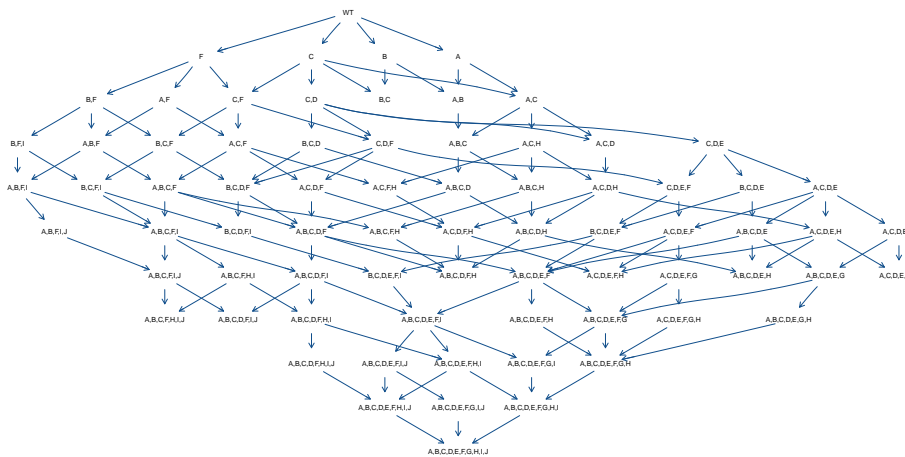

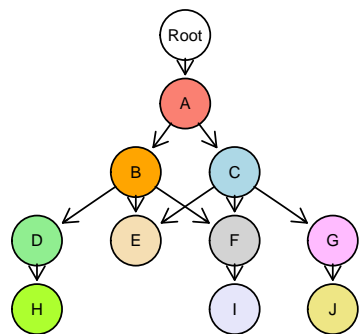

ID **tytbSnHlzi26I77A**  
 acc genotypes **62**  
 peaks no back **7**  
 removed edges **18**  
 prop rem edges **0.122**

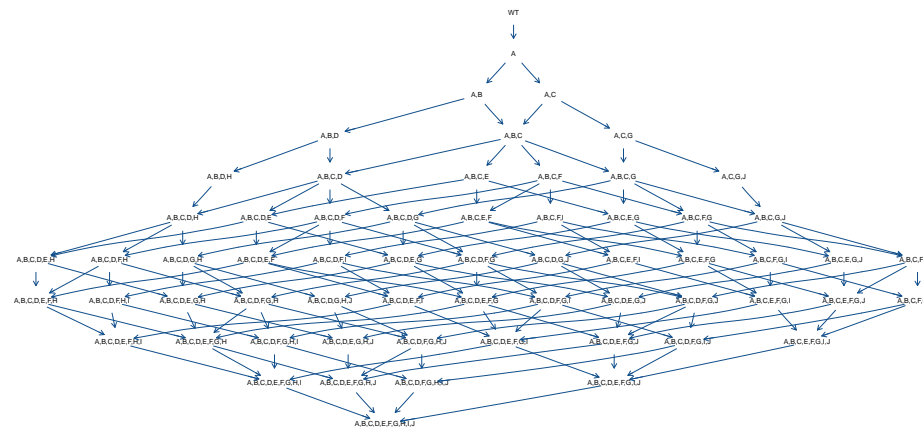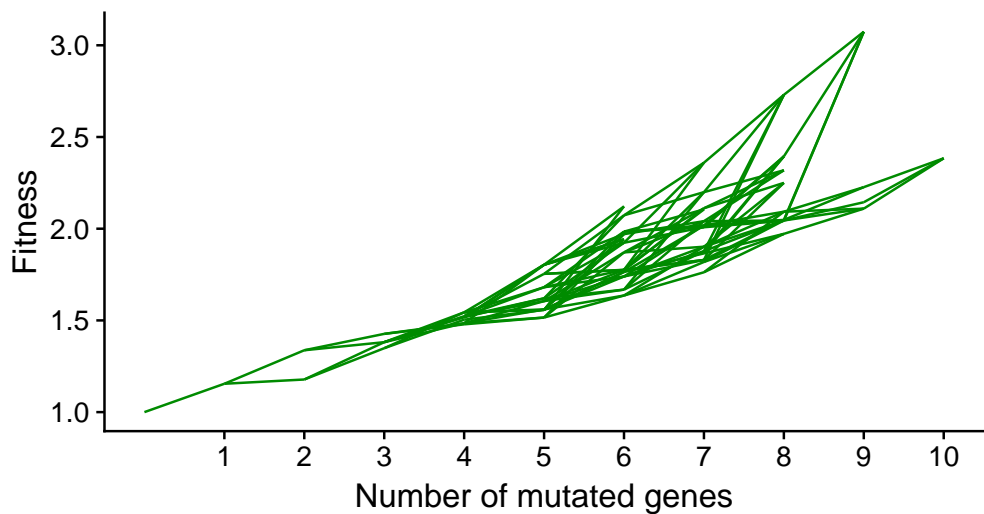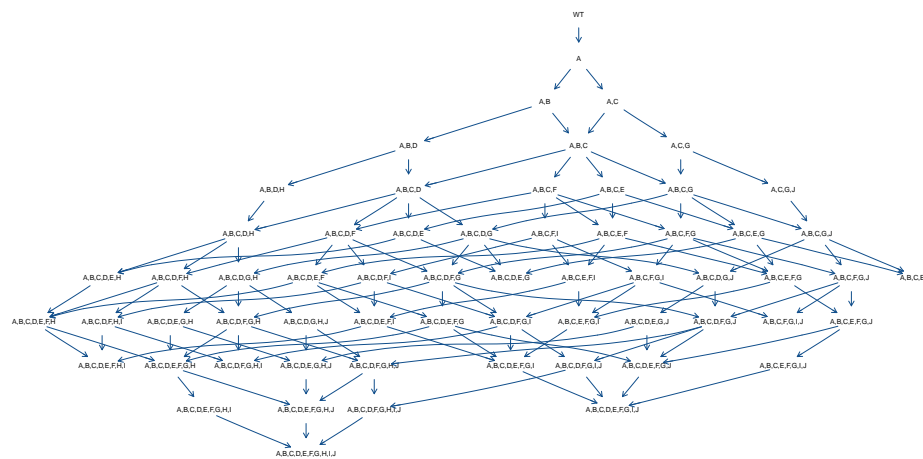

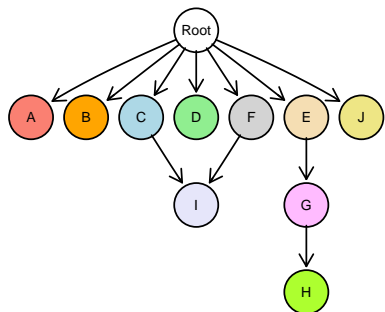

*ID* TZFzcsBmlMqGCih  
*acc genotypes* 320  
*peaks no back* 22  
*removed edges* 231  
*prop rem edges* 0.192

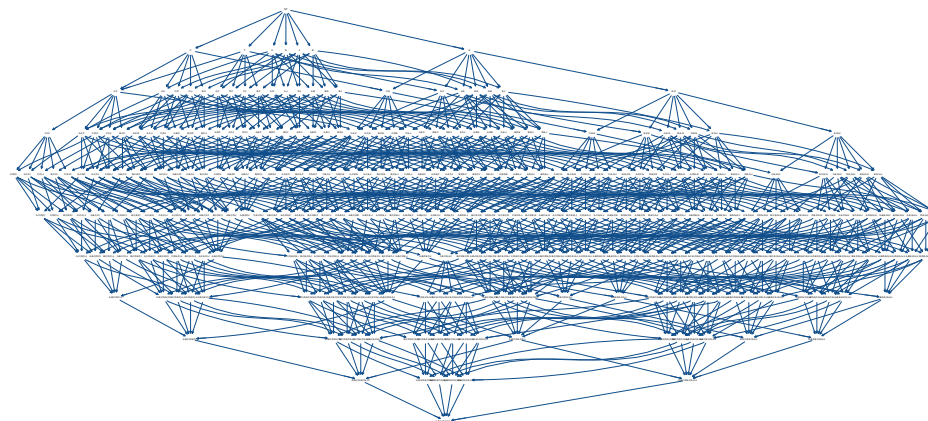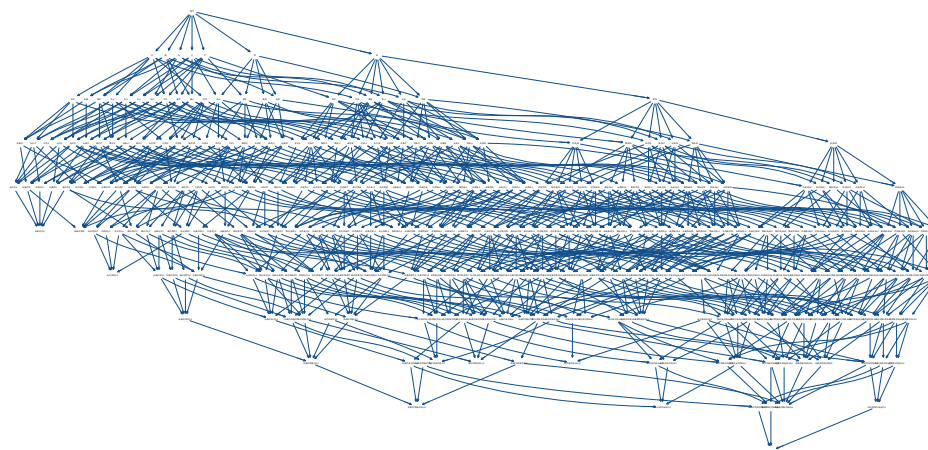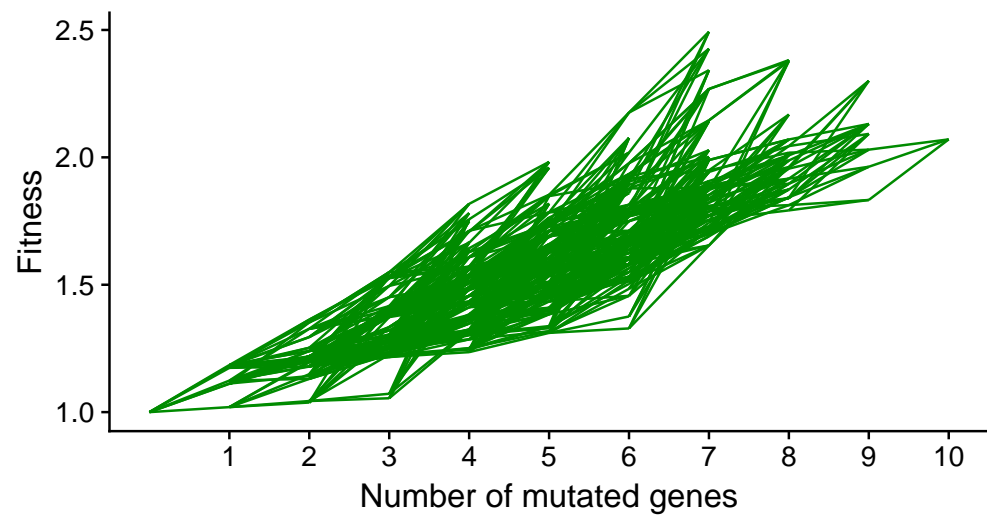

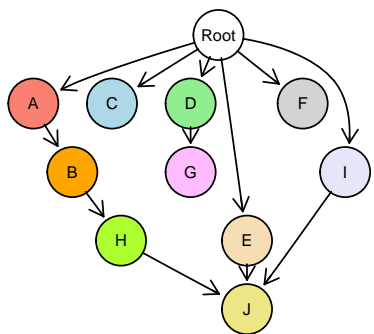

ID **UBKJVjkeIEDOKL7i**  
 acc genotypes **204**  
 peaks no back **14**  
 removed edges **117**  
 prop rem edges **0.17**

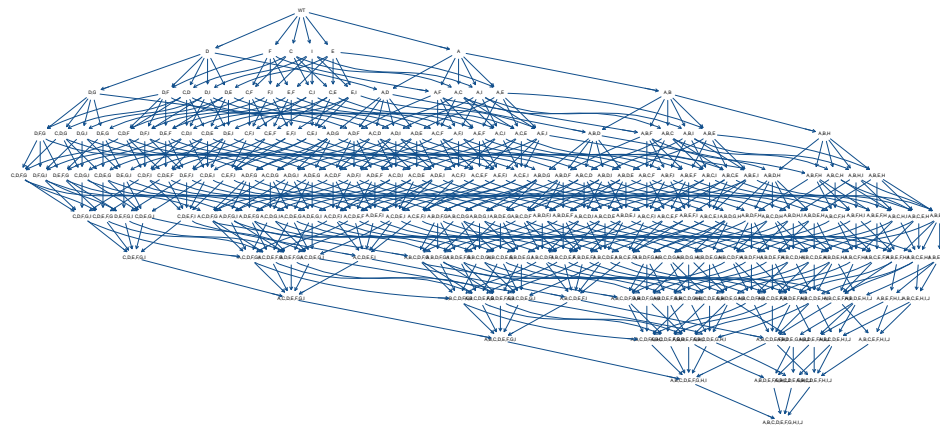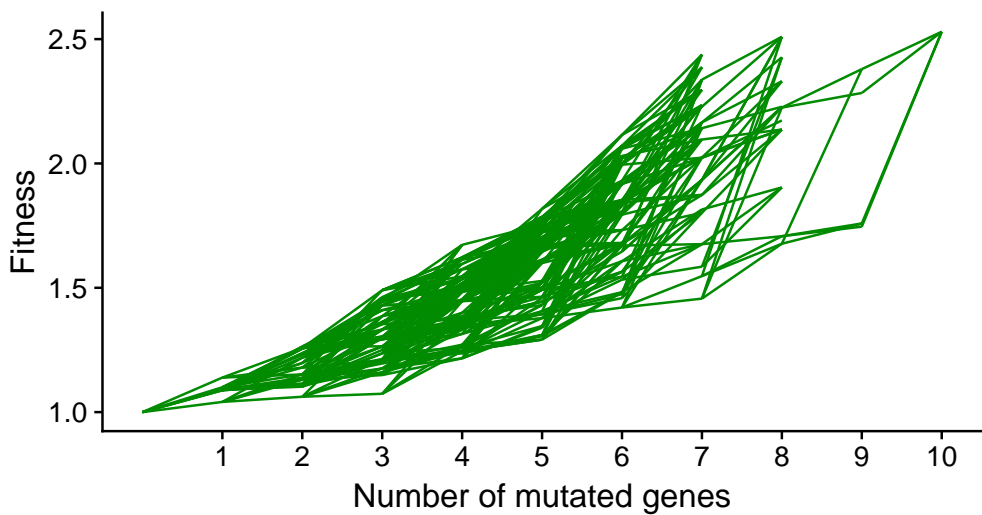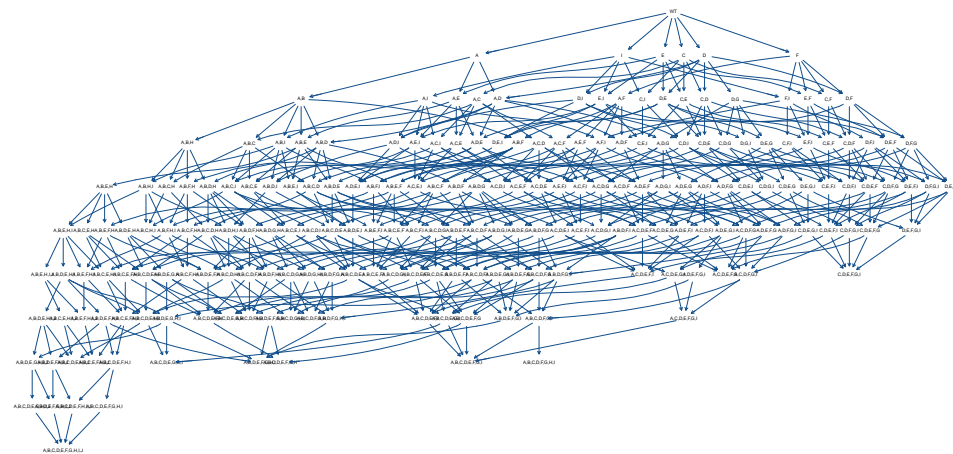

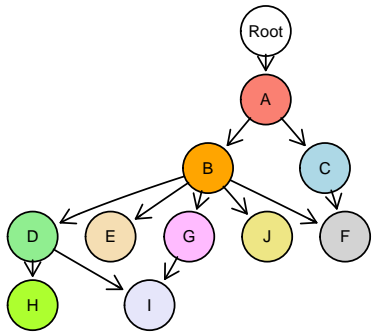

ID **Ue10Y3AbLFXoQDQkX**  
 acc genotypes **99**  
 peaks no back **13**  
 removed edges **62**  
 prop rem edges **0.218**

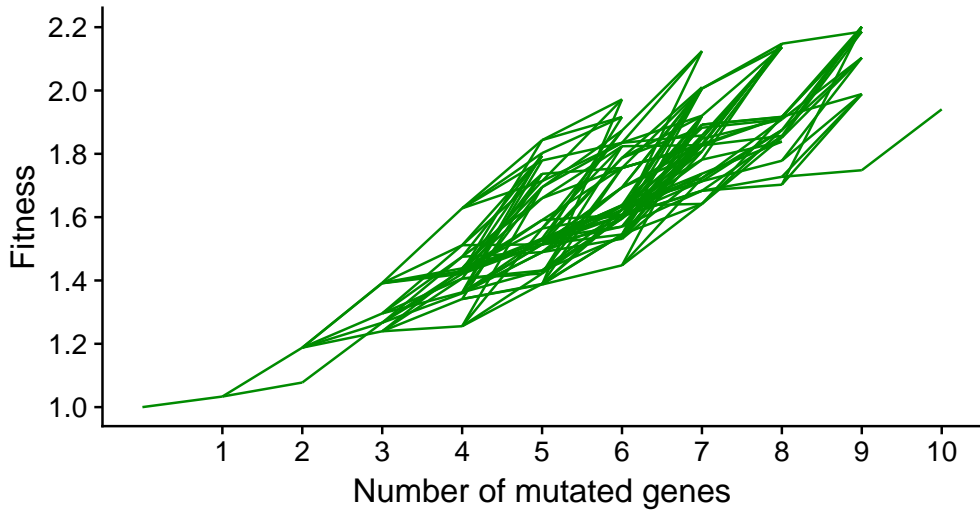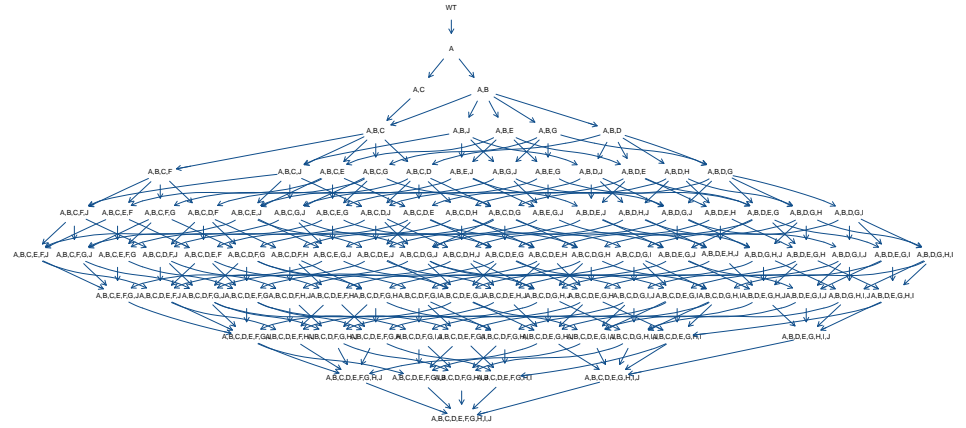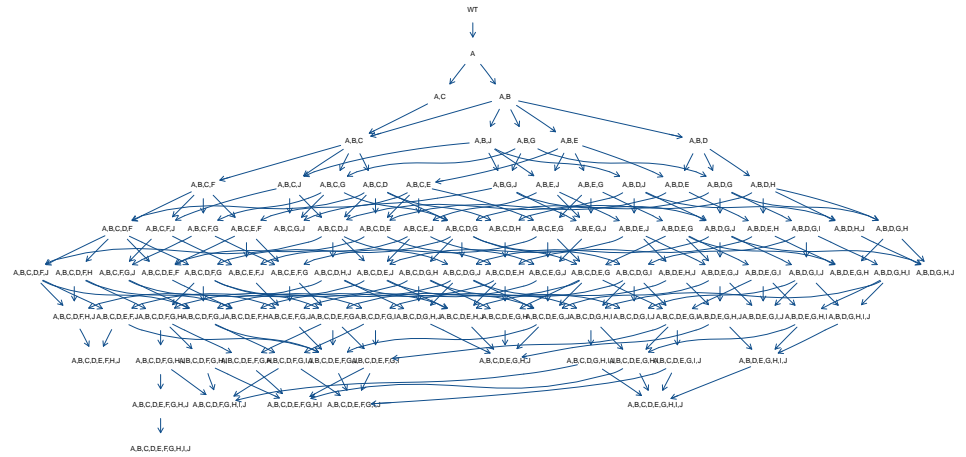

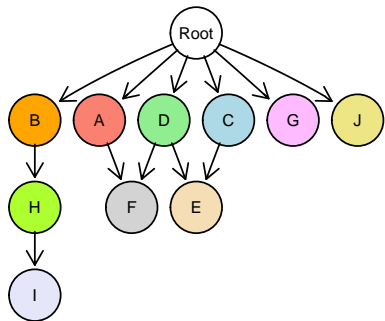

ID [UEcQih9YNrZ2uptX](#)  
 acc genotypes 208  
 peaks no back 18  
 removed edges 127  
 prop rem edges 0.186

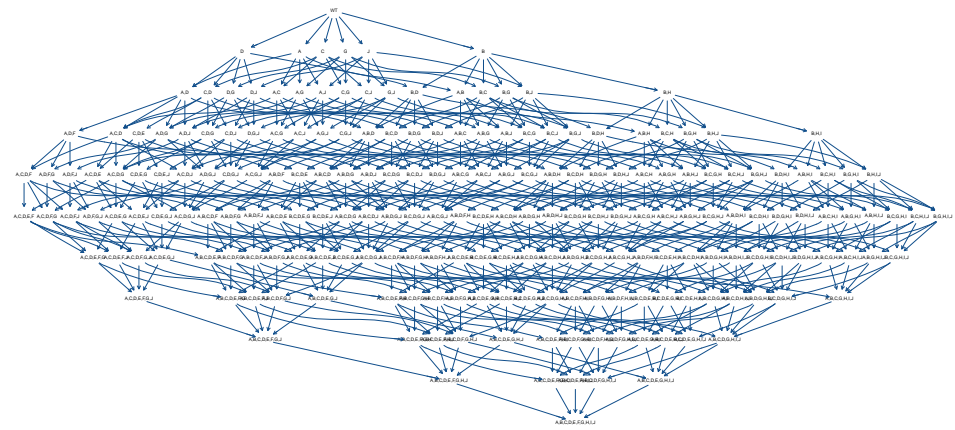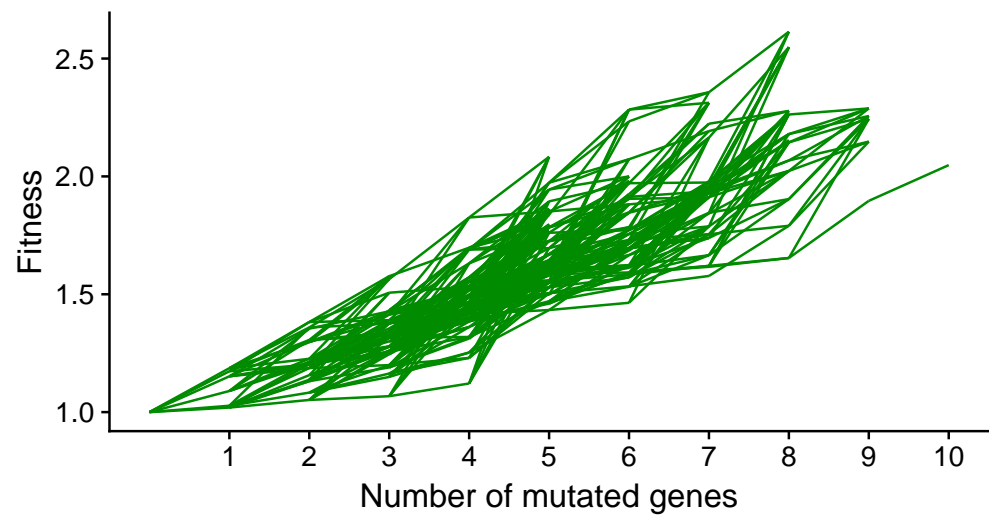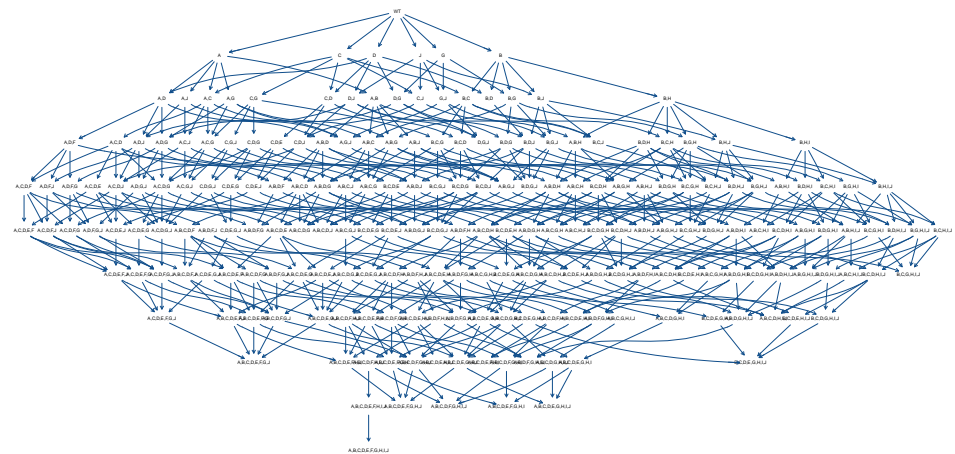

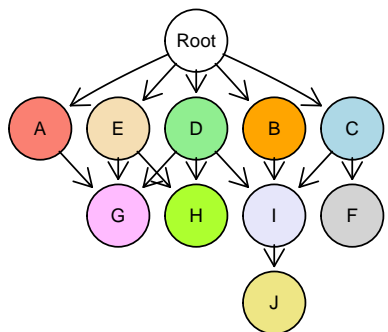

ID UHMicOOKS2hFJbTg  
 acc genotypes 104  
 peaks no back 10  
 removed edges 51  
 prop rem edges 0.182

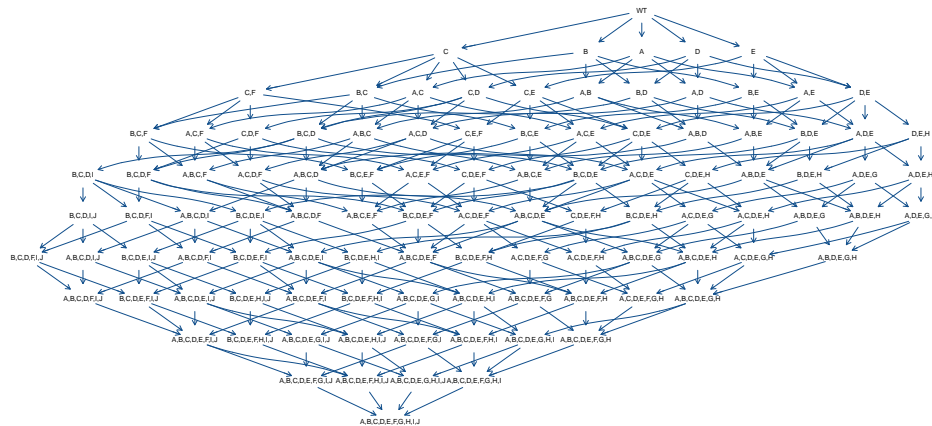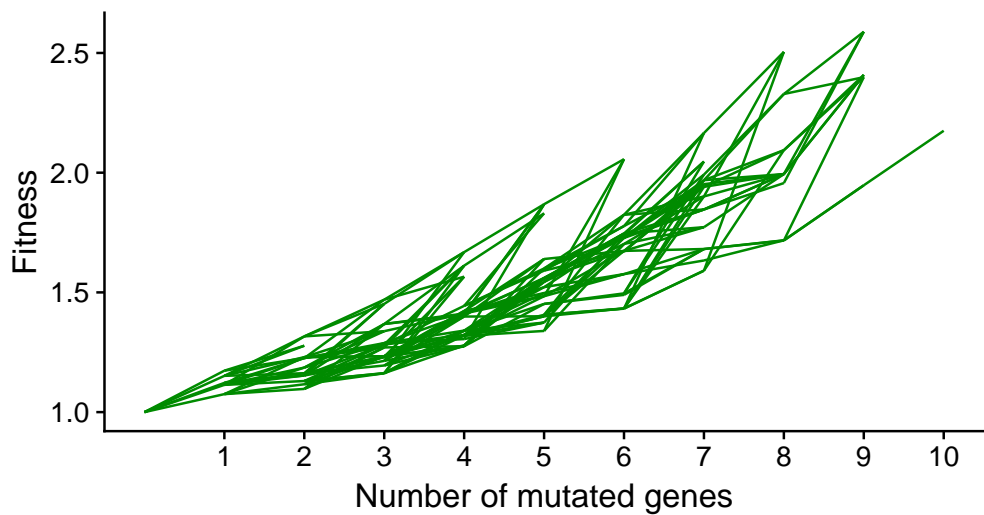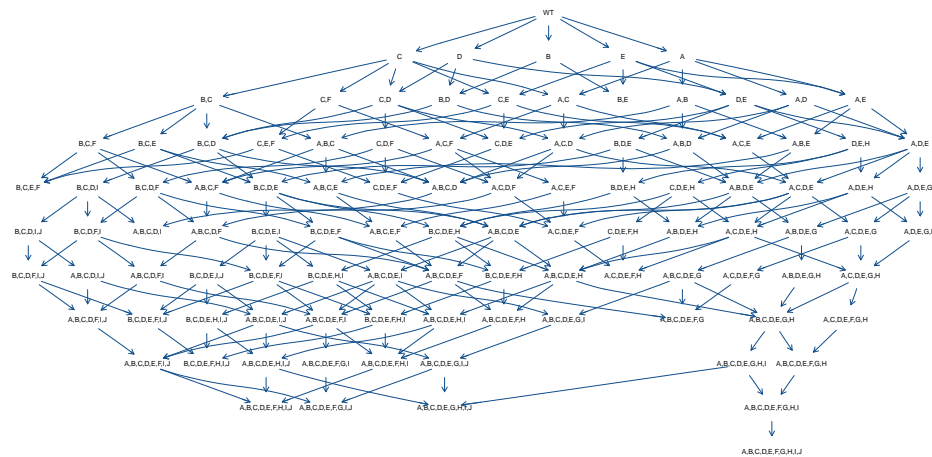



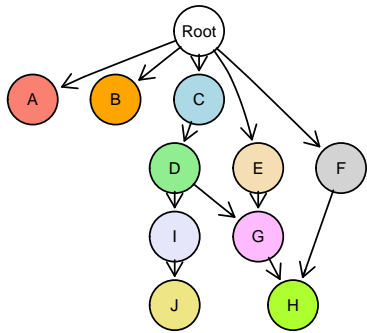

ID **uKmhMNcyKeL13N10d**  
 acc genotypes **116**  
 peaks no back **12**  
 removed edges **59**  
 prop rem edges **0.178**

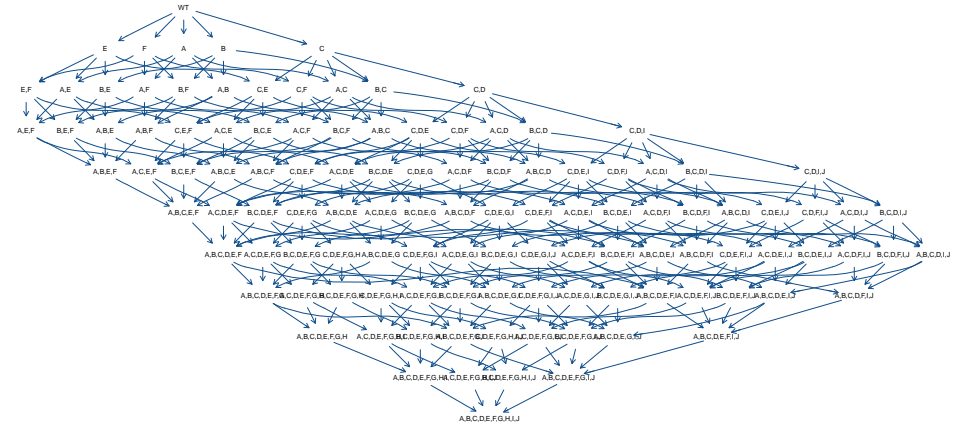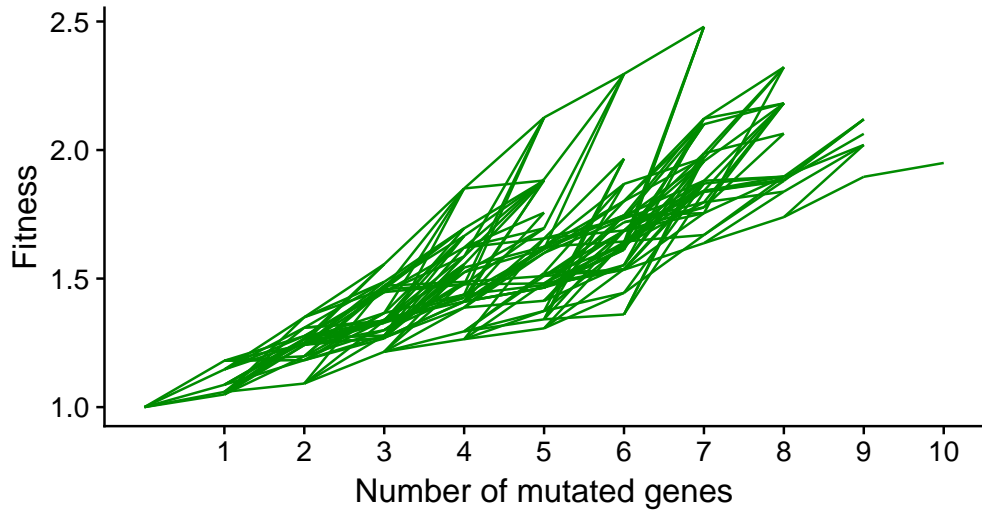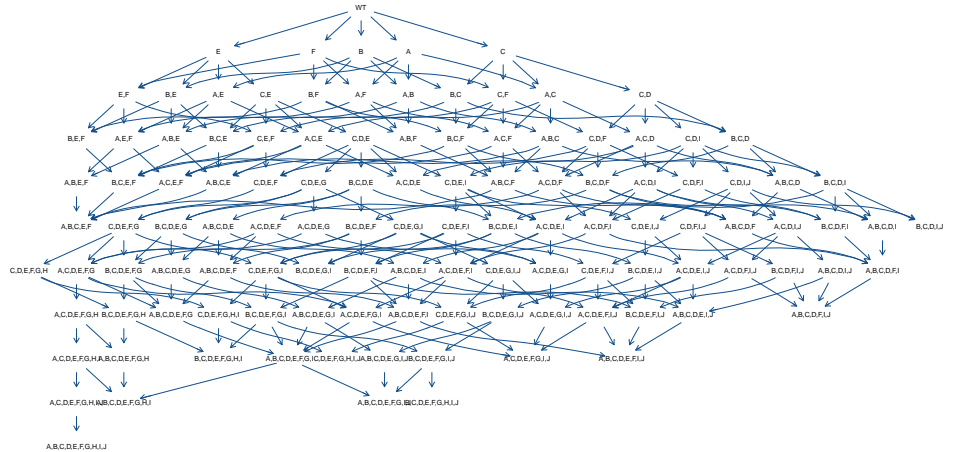

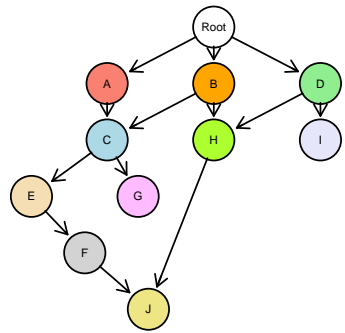

ID UoHyw1GDeCOAnn4H  
 acc genotypes 50  
 peaks no back 6  
 removed edges 23  
 prop rem edges 0.217

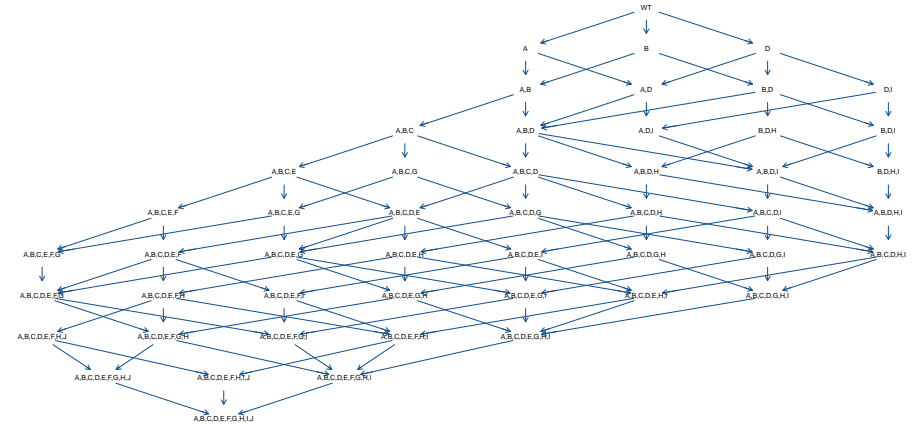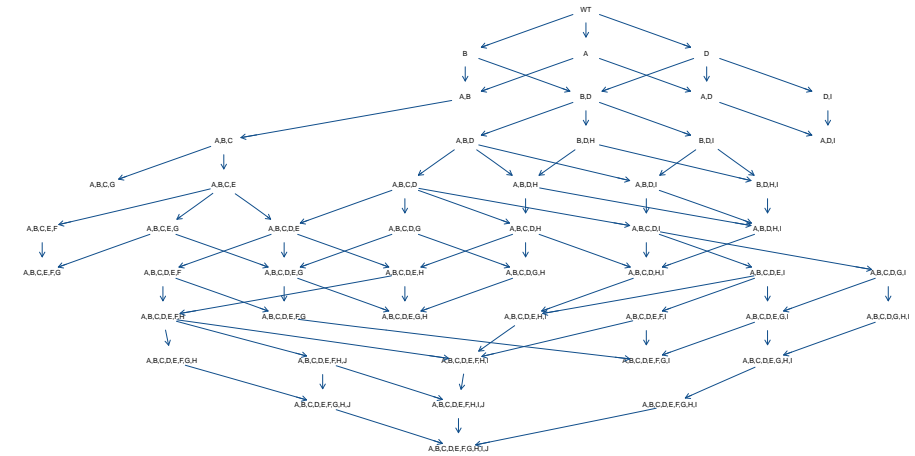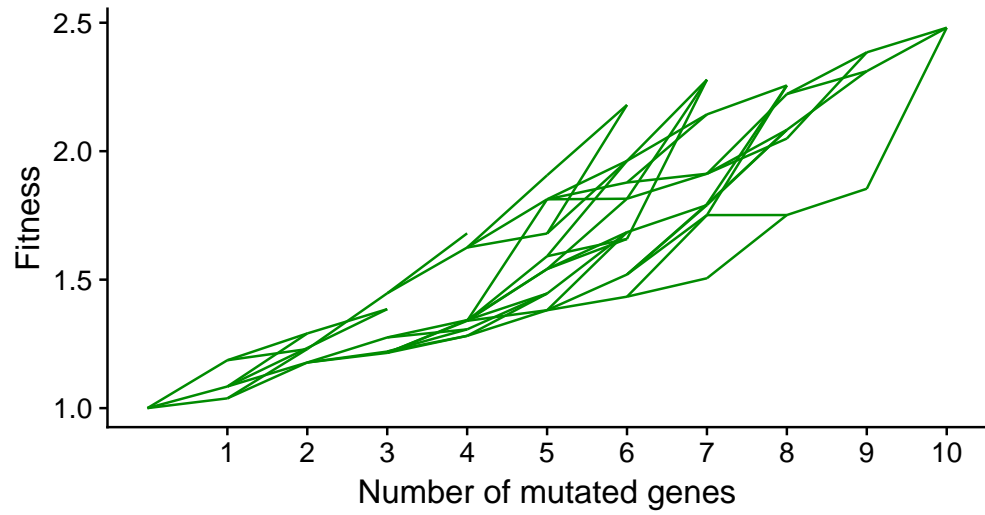

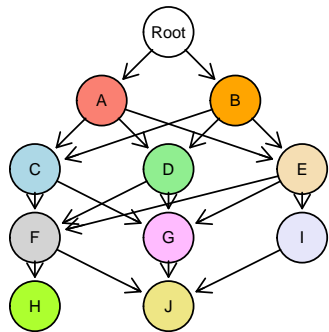

ID **utFV4f4ZwaTtF6F7**  
 acc genotypes **27**  
 peaks no back **5**  
 removed edges **7**  
 prop rem edges **0.152**

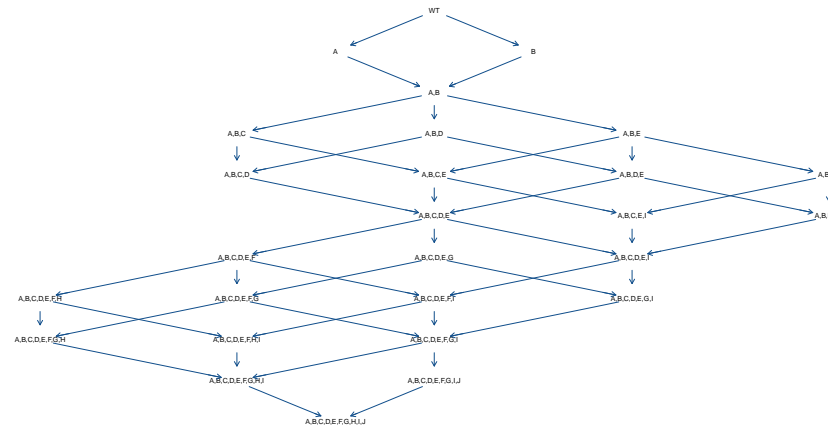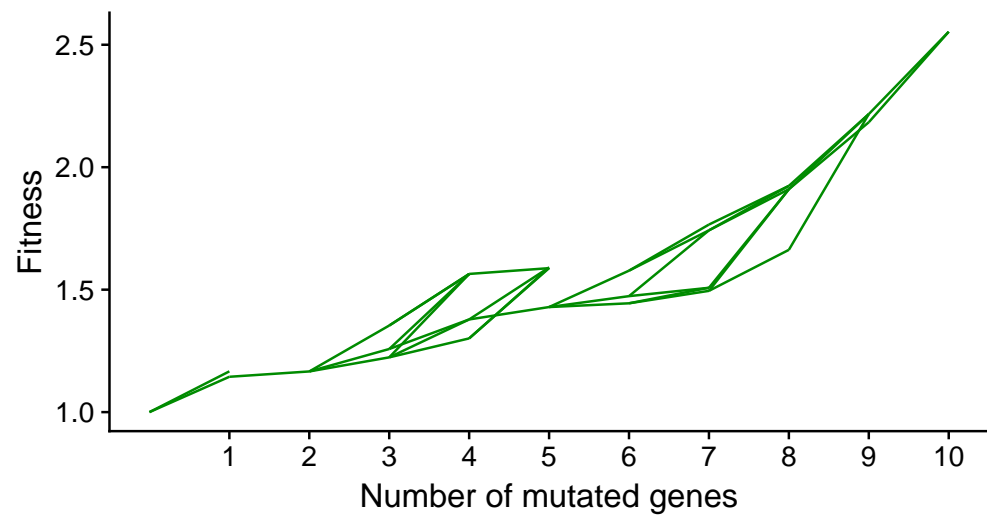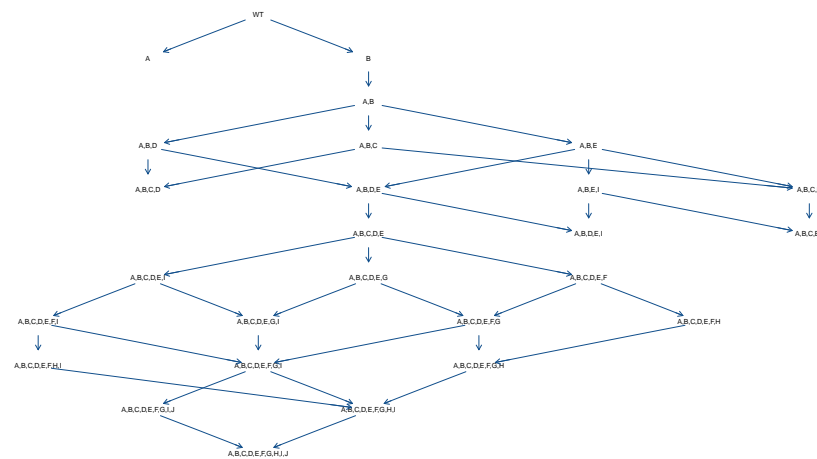

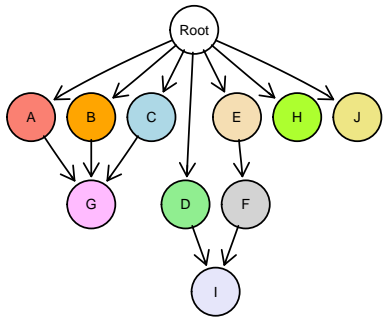

*ID* uzycnOVWW3JNvHXq  
*acc genotypes* 252  
*peaks no back* 17  
*removed edges* 162  
*prop rem edges* 0.179

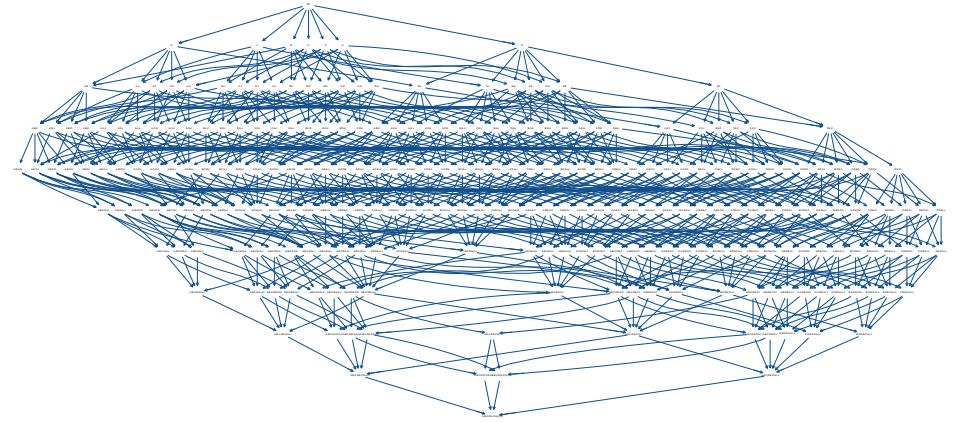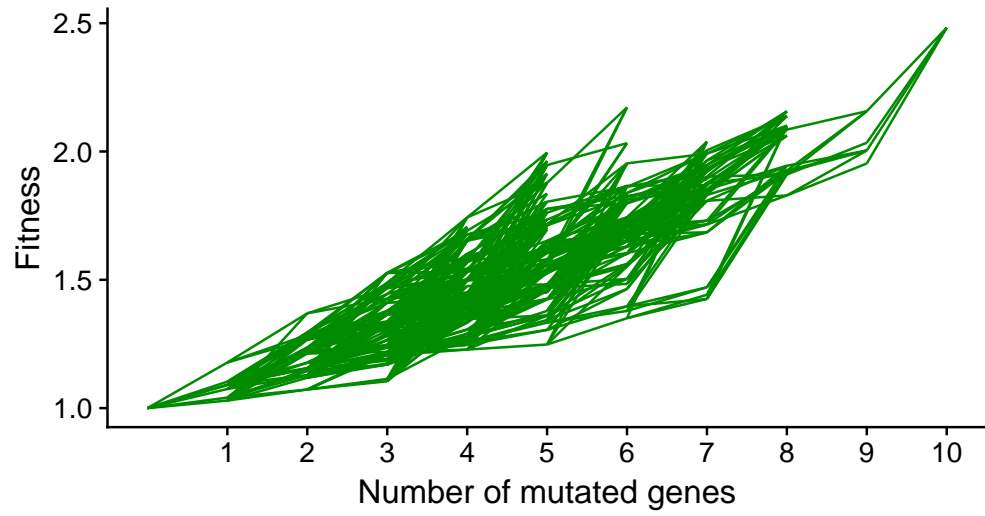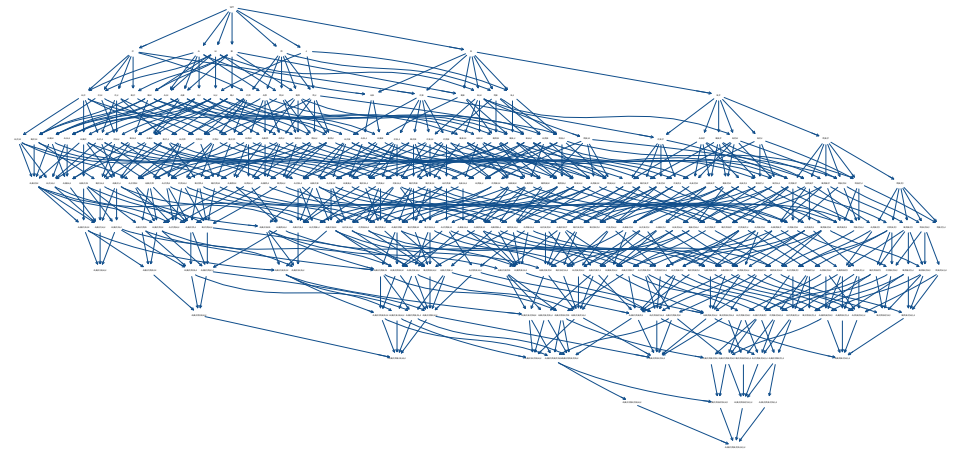

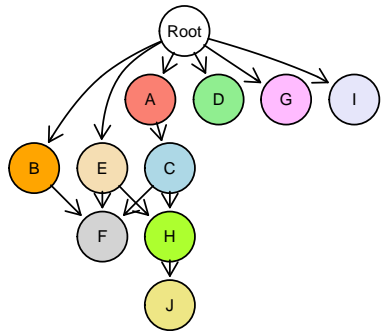

ID **V3Myq6Ap7yTWkyC1**  
 acc genotypes **152**  
 peaks no back **19**  
 removed edges **116**  
 prop rem edges **0.244**

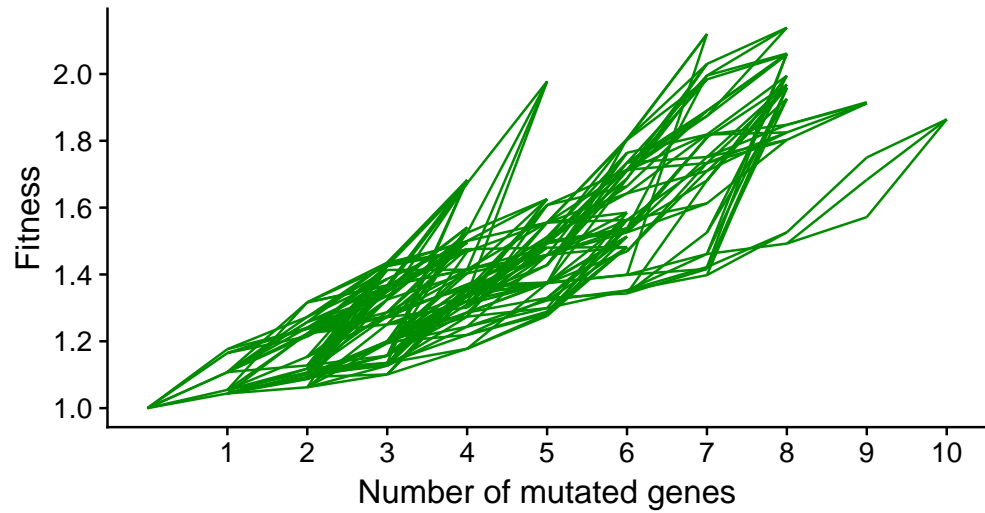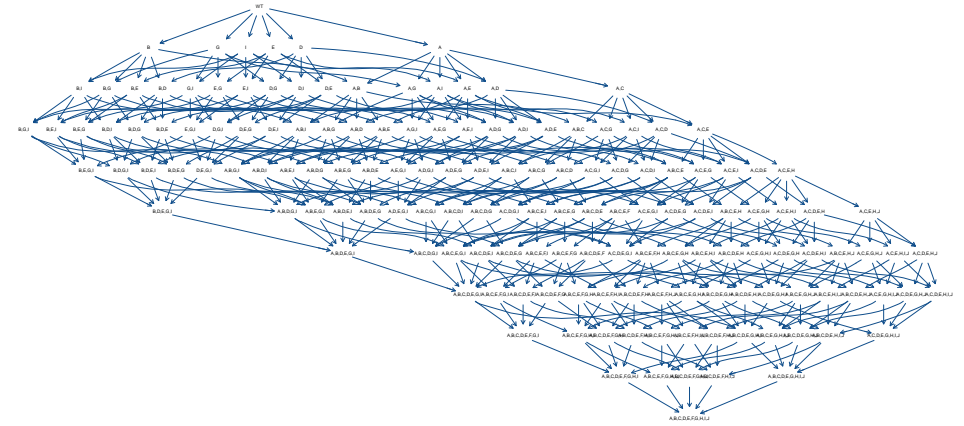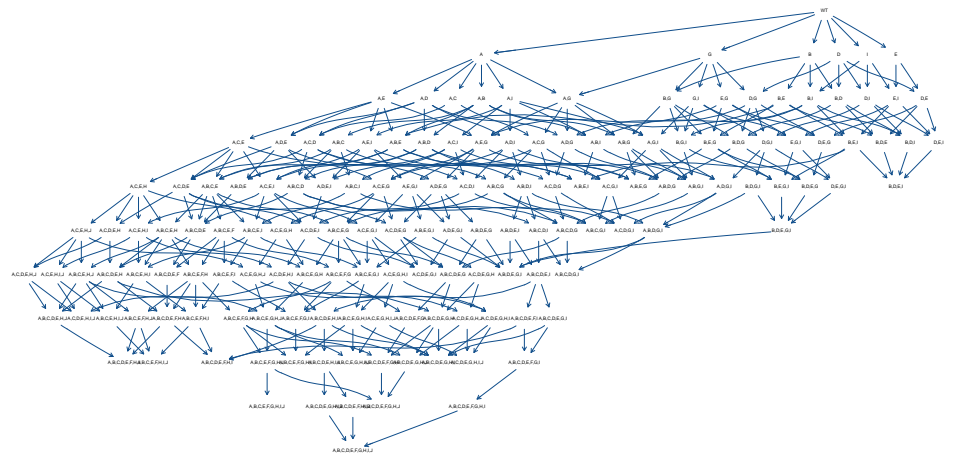

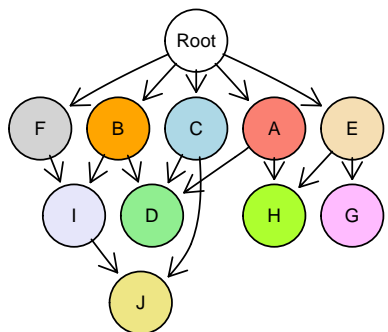

ID **v3T1IG10jXOD5TPVs**  
 acc genotypes **108**  
 peaks no back **11**  
 removed edges **62**  
 prop rem edges **0.212**

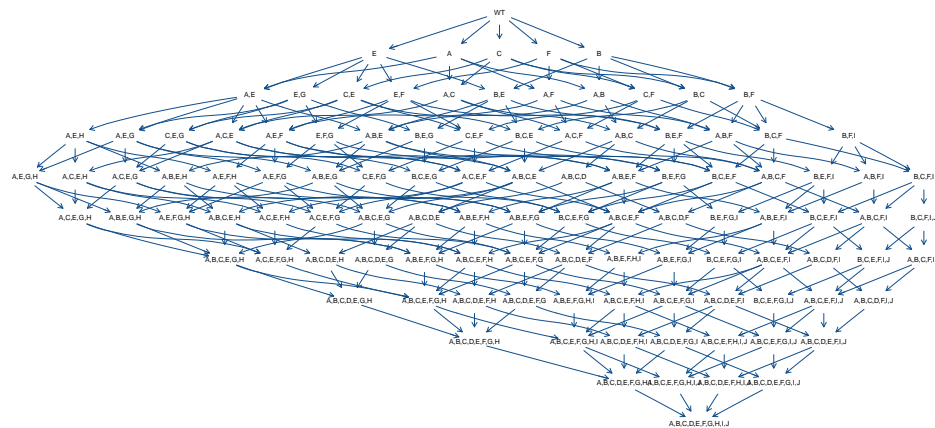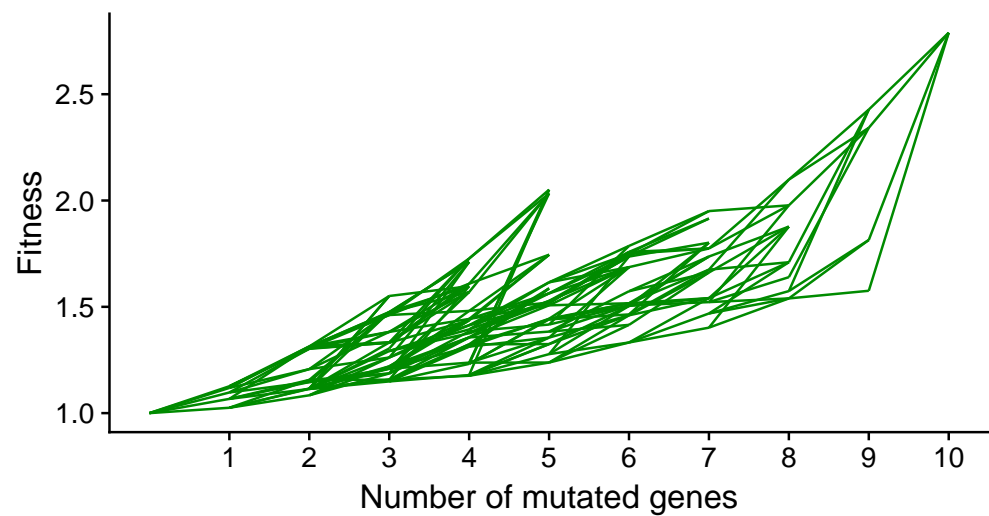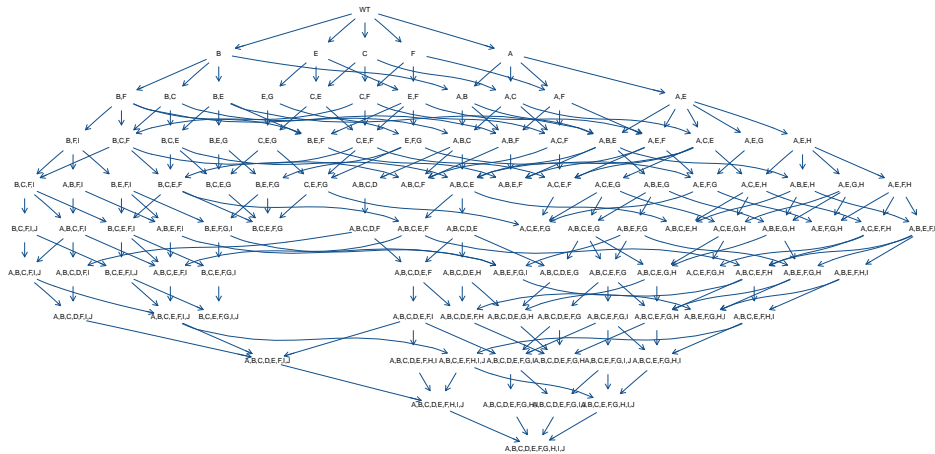

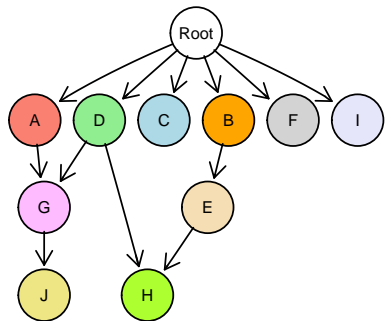

ID vDscwX1MSzAXnUjn  
 acc genotypes 176  
 peaks no back 14  
 removed edges 95  
 prop rem edges 0.17

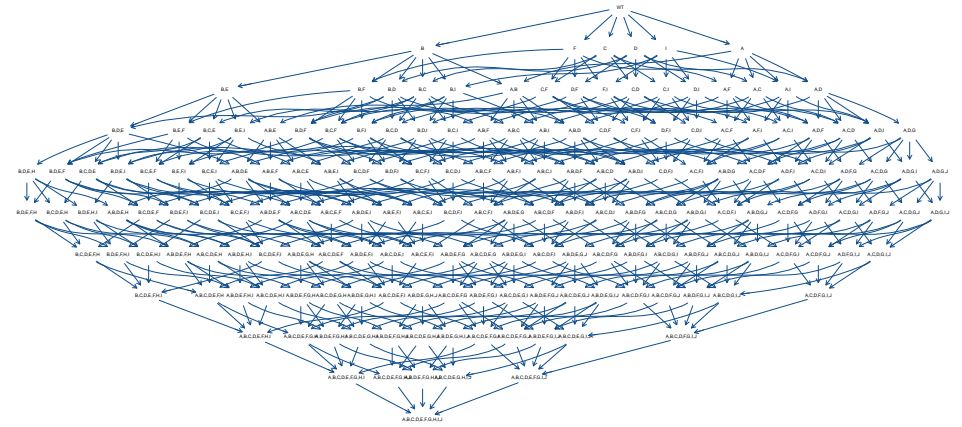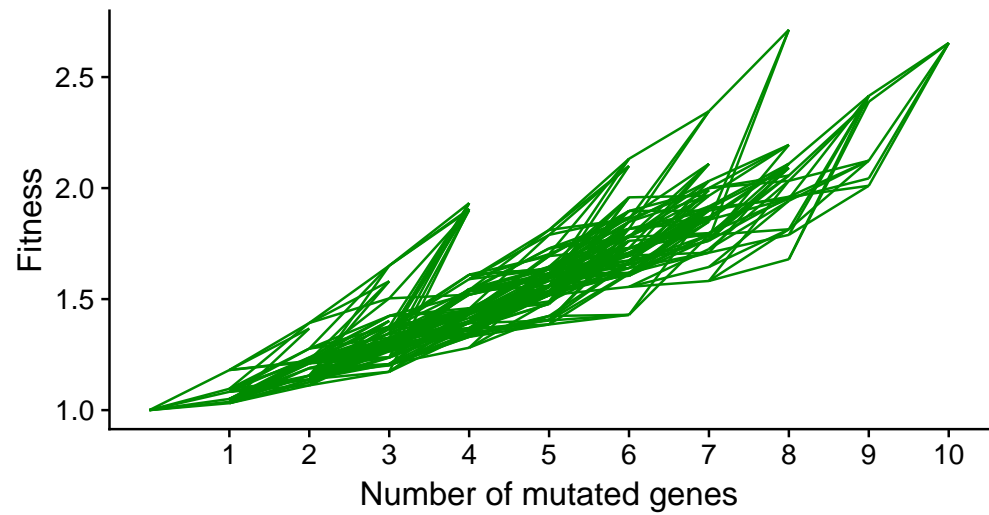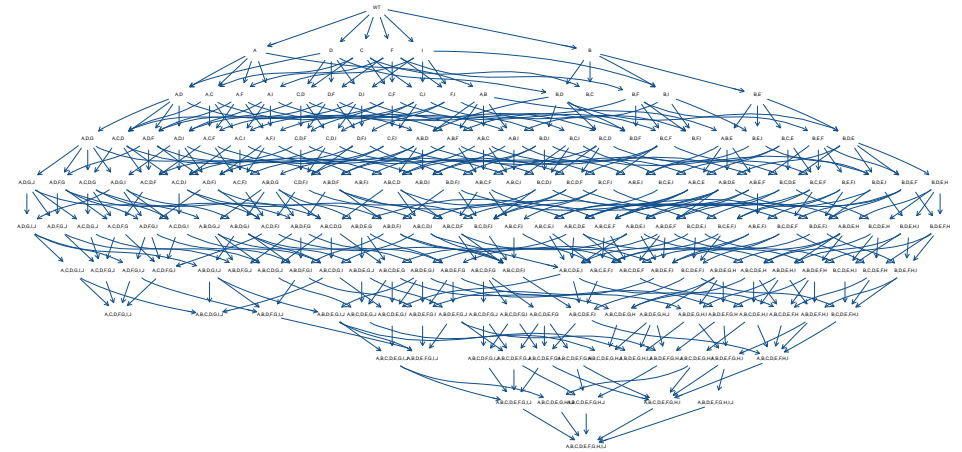

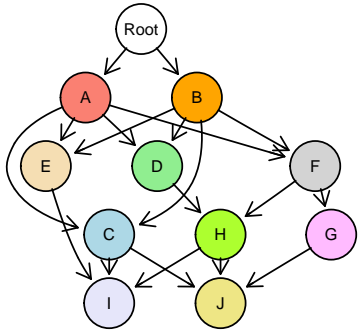

ID **veSOPRnlSirW3tXS**  
 acc genotypes **40**  
 peaks no back **7**  
 removed edges **18**  
 prop rem edges **0.214**

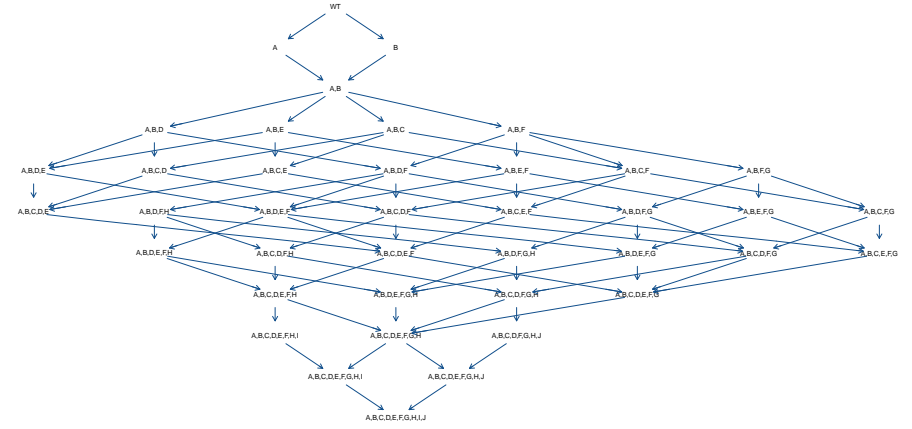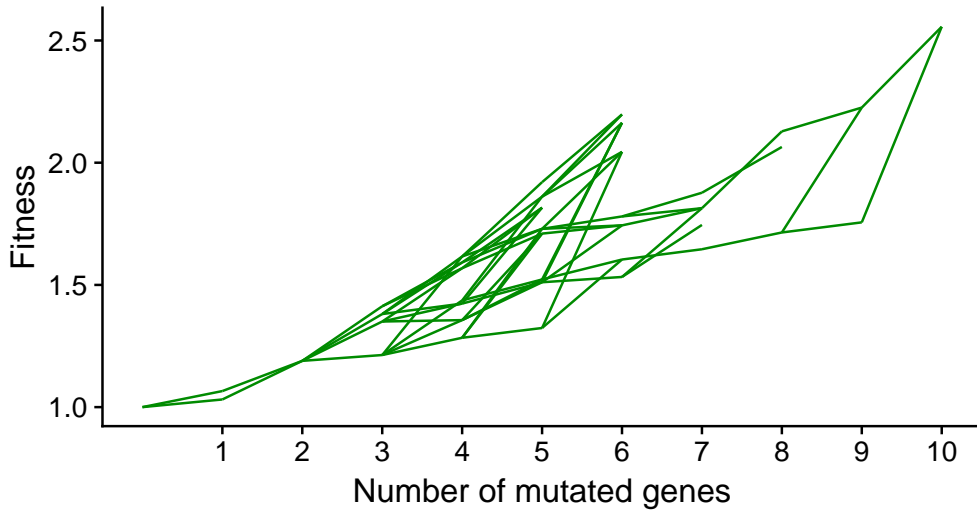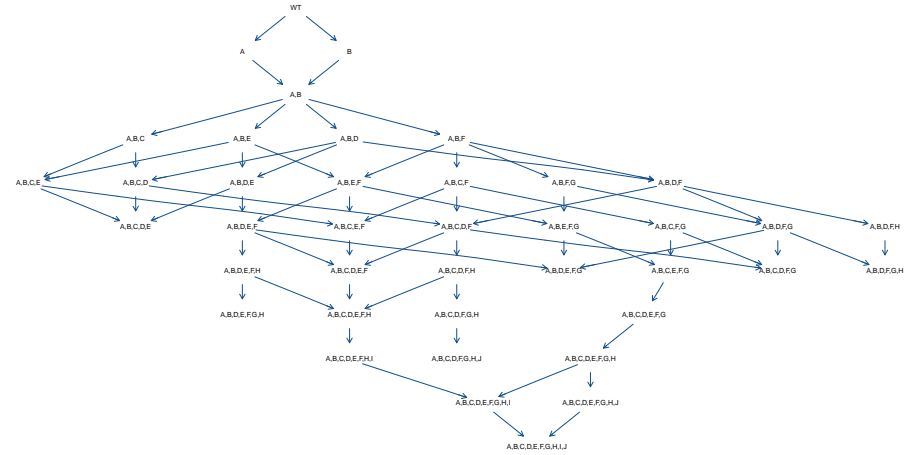



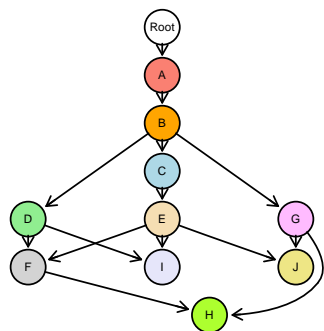

ID **vm585SzZroFfErOI**  
 acc genotypes **29**  
 peaks no back 2  
 removed edges 3  
 prop rem edges 0.059

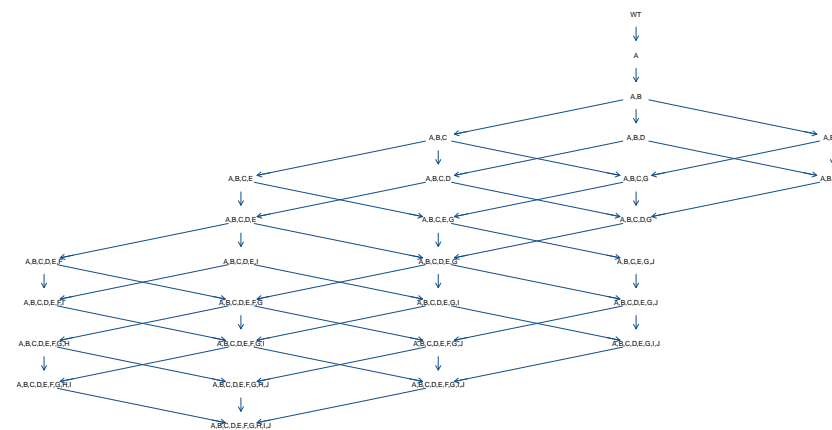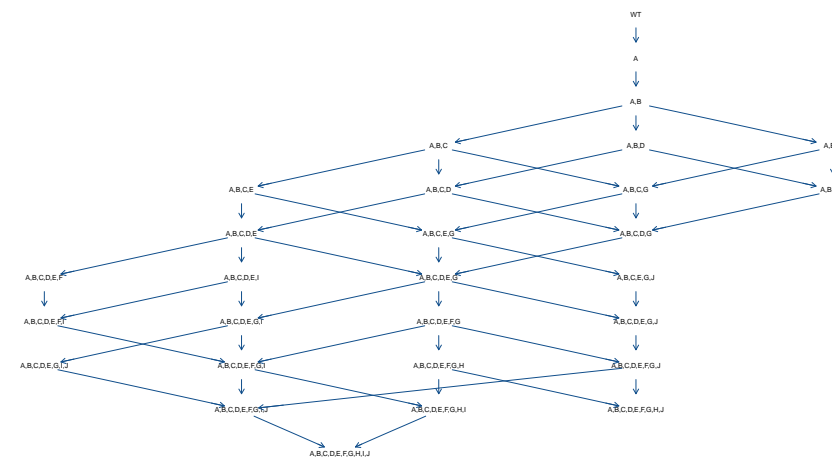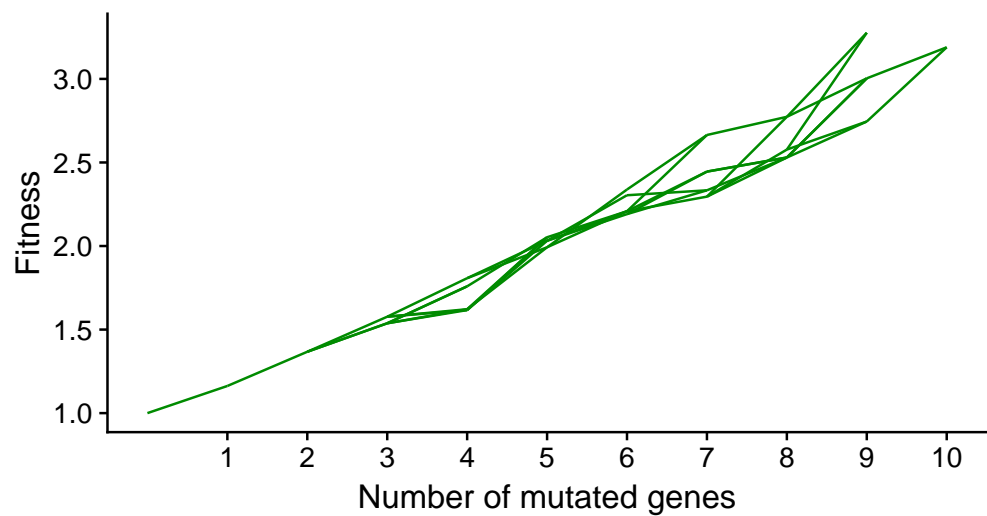

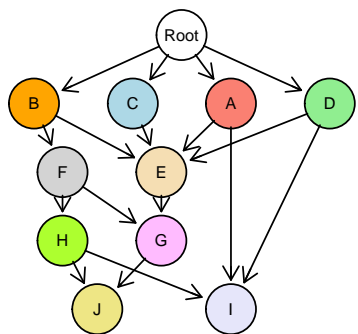

ID VNq9x3A103vjj6H6C  
 acc genotypes 43  
 peaks no back 6  
 removed edges 18  
 prop rem edges 0.2

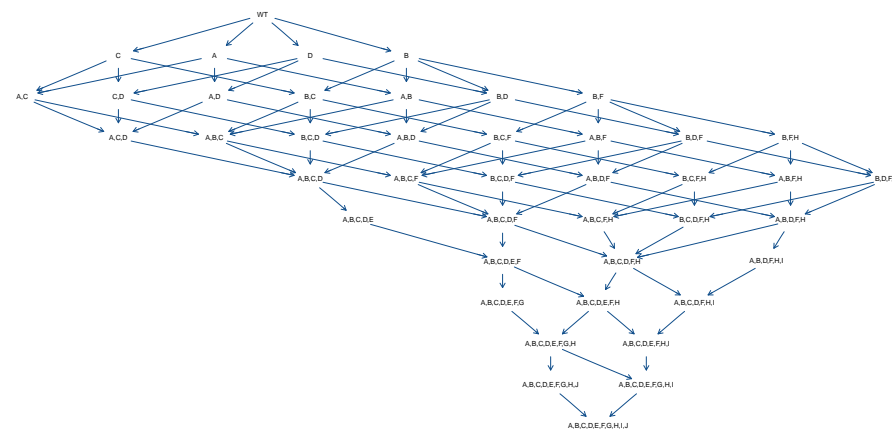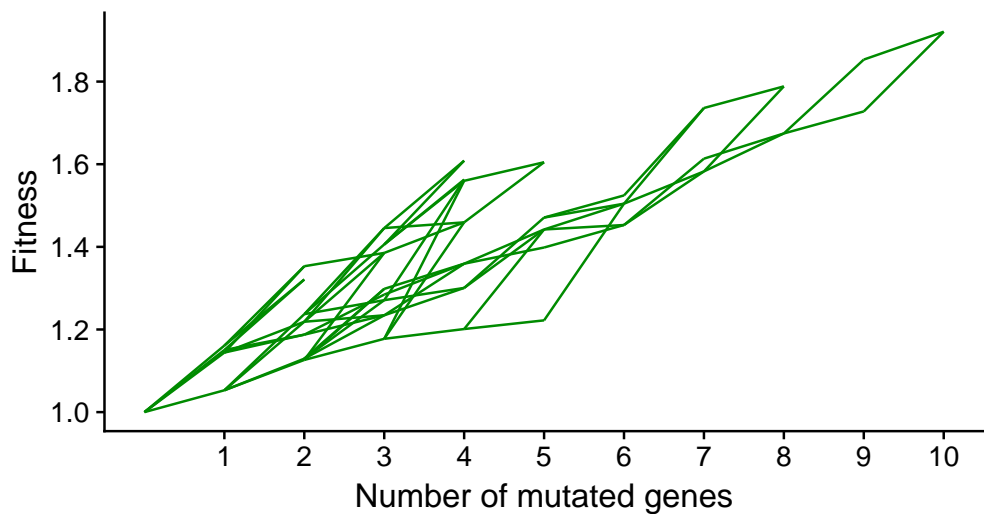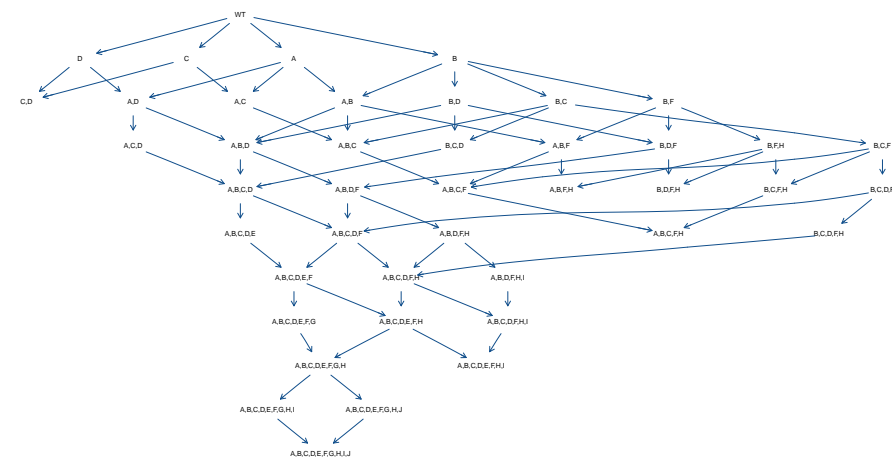

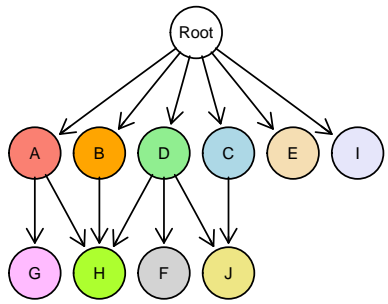

ID [w2gKASMJutkLe413](#)  
 acc genotypes 240  
 peaks no back 20  
 removed edges 158  
 prop rem edges 0.19

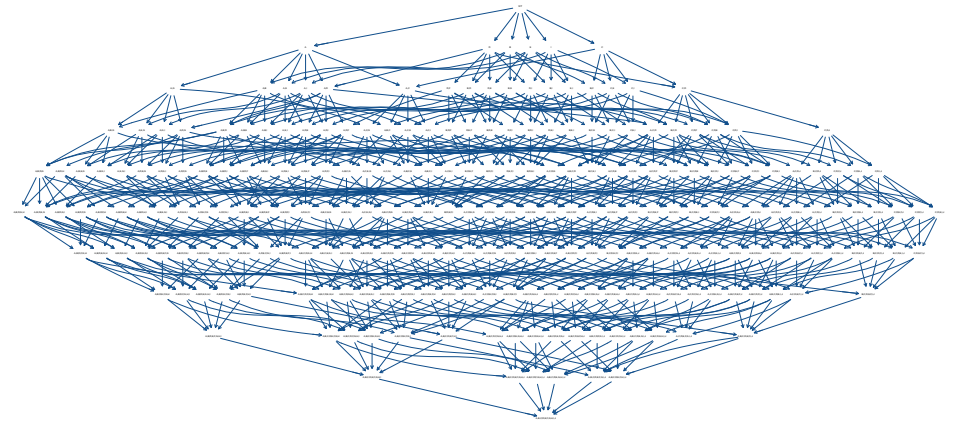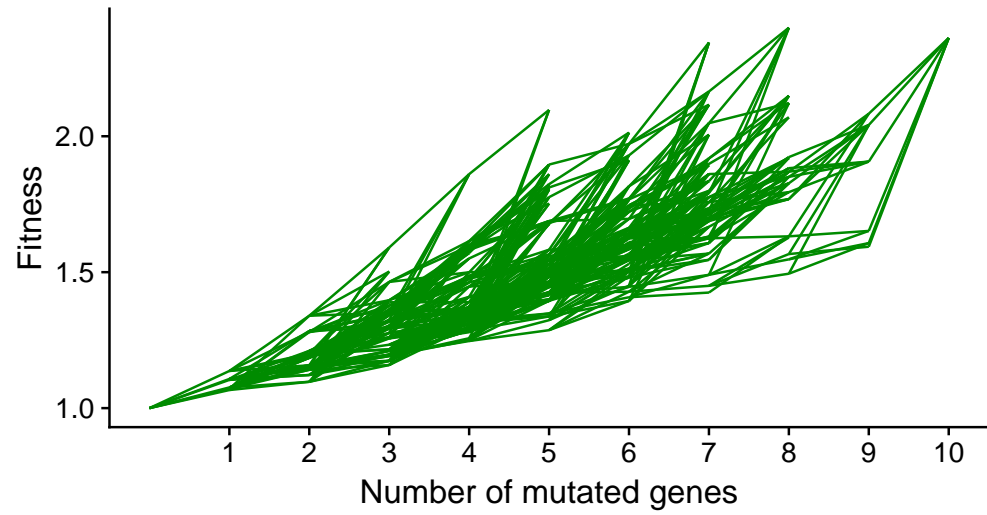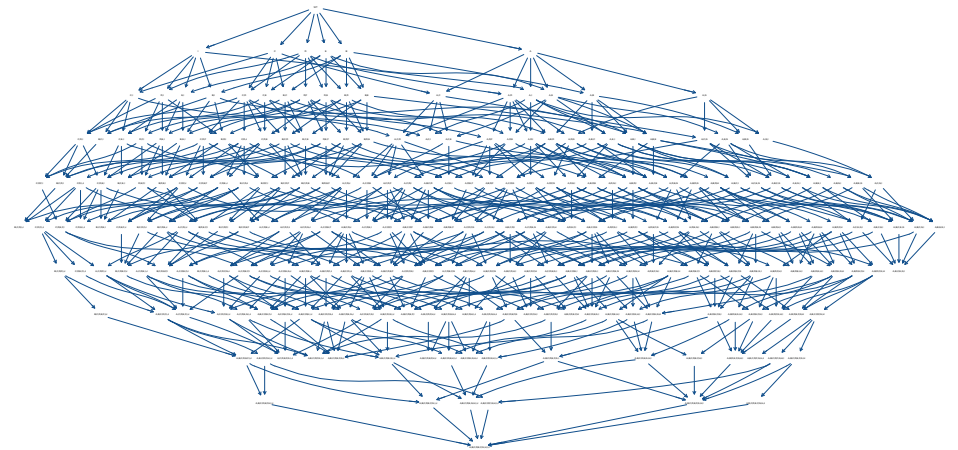

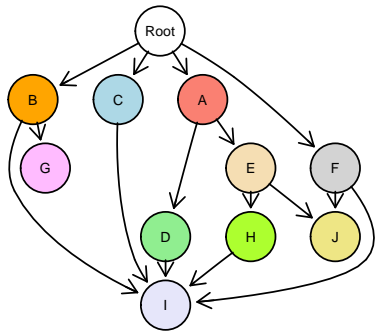

ID wavyEmnct10zXrBsJ  
 acc genotypes 112  
 peaks no back 11  
 removed edges 68  
 prop rem edges 0.212

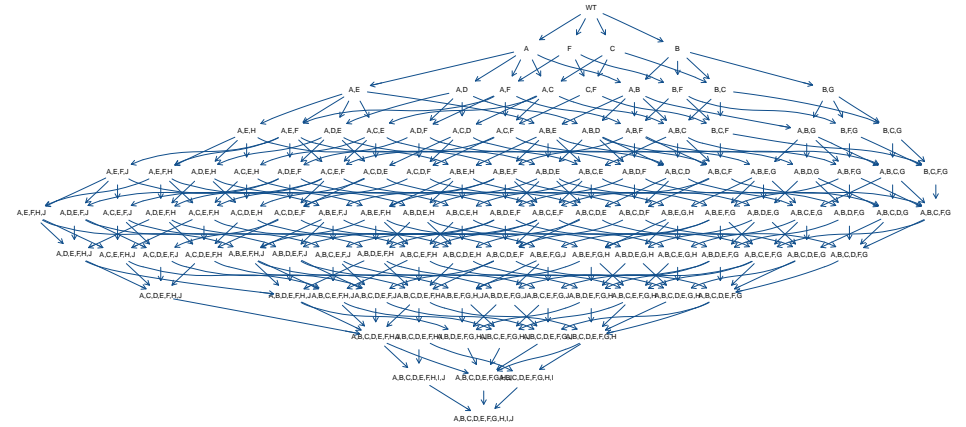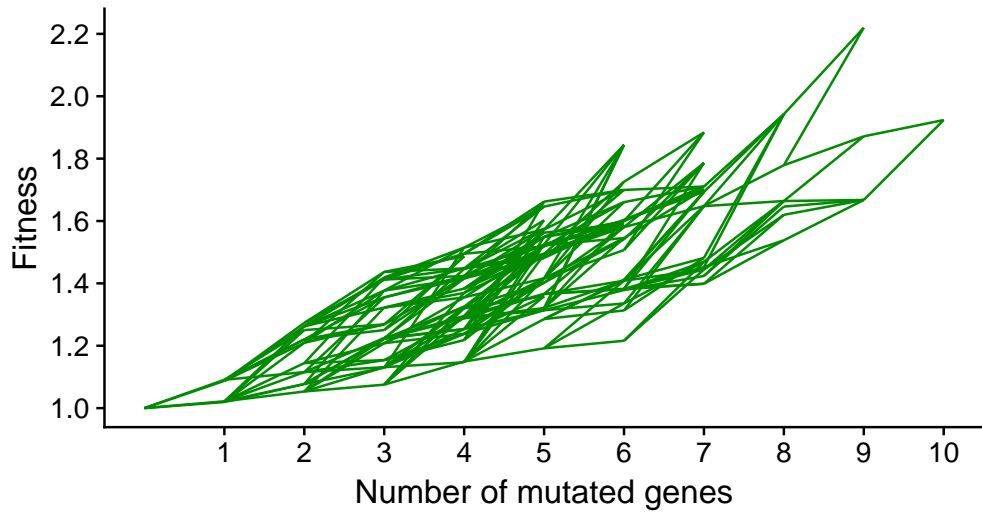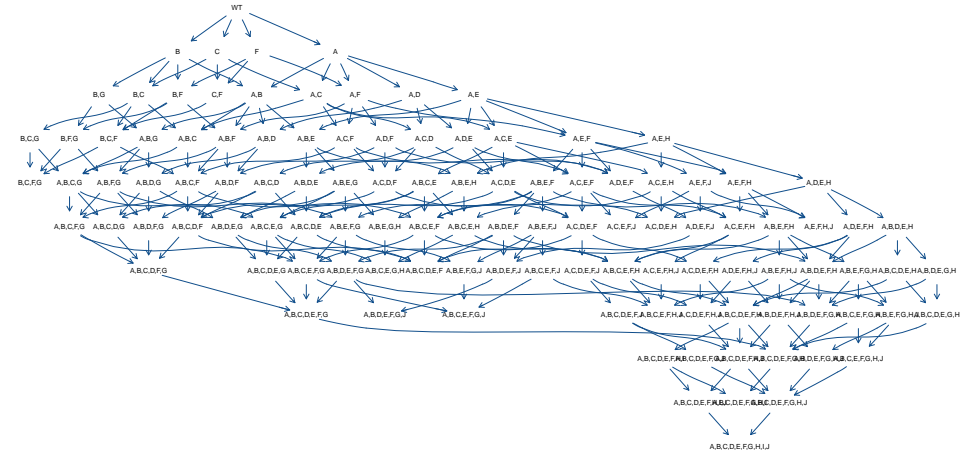

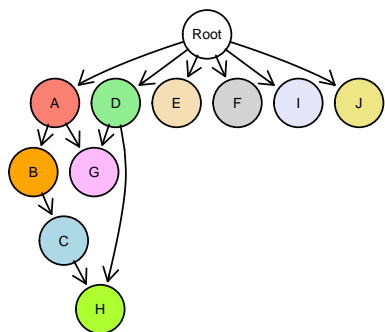

ID **wcH6gWqLOjM6KUvj**  
 acc genotypes **208**  
 peaks no back **21**  
 removed edges **145**  
 prop rem edges **0.206**

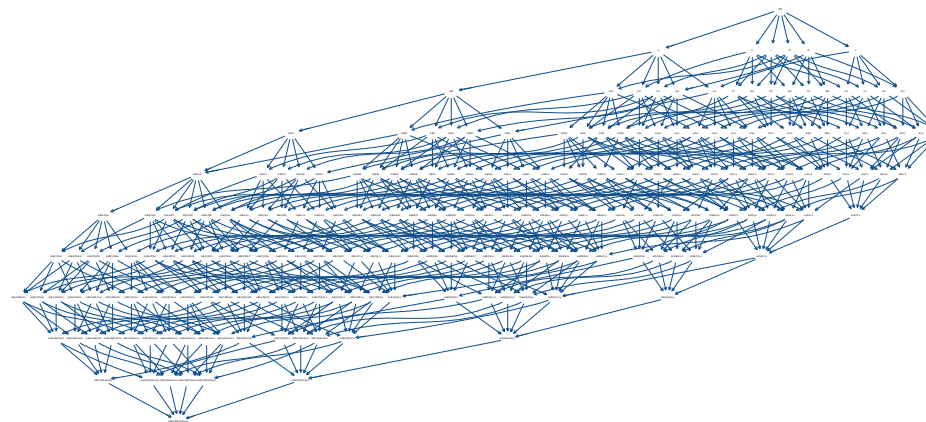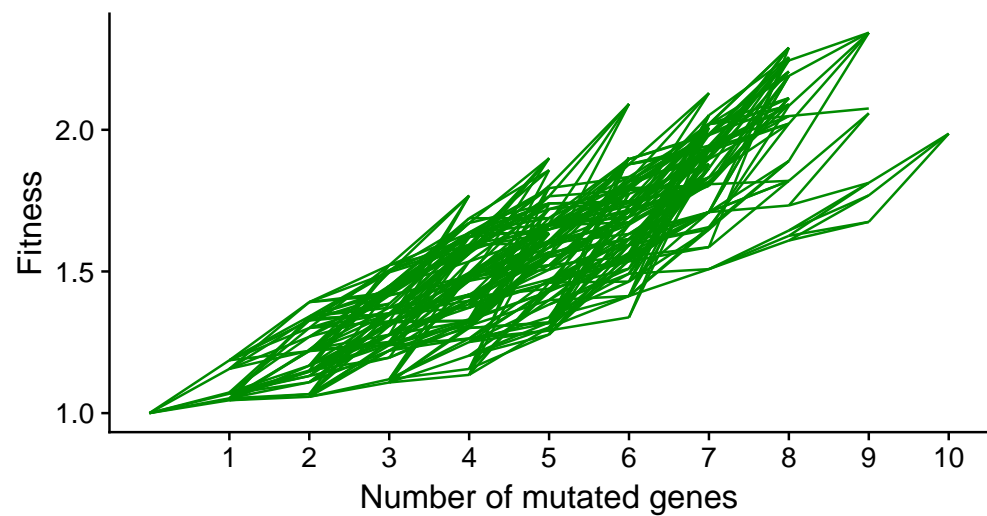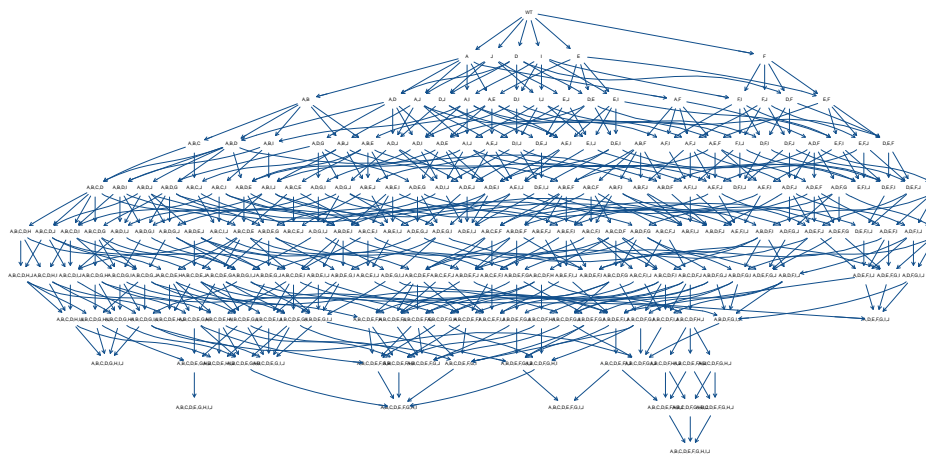

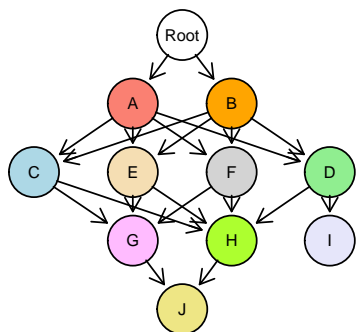

ID [wCi29Nr110GfPJ9ih](#)  
 acc genotypes 36  
 peaks no back 6  
 removed edges 10  
 prop rem edges 0.139

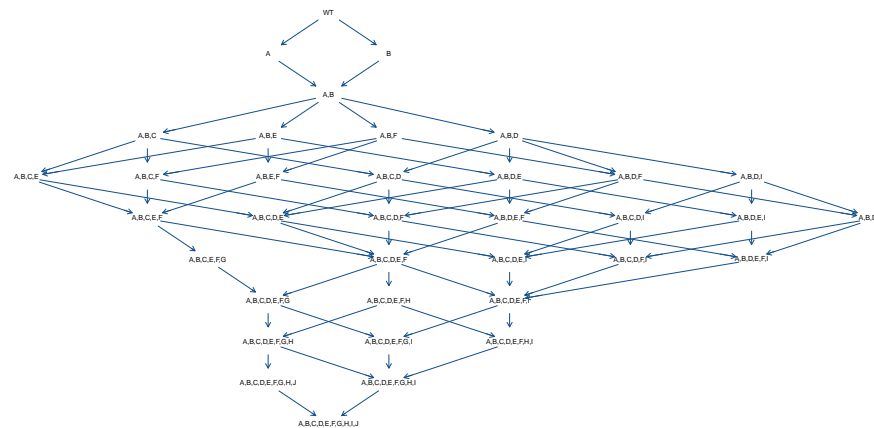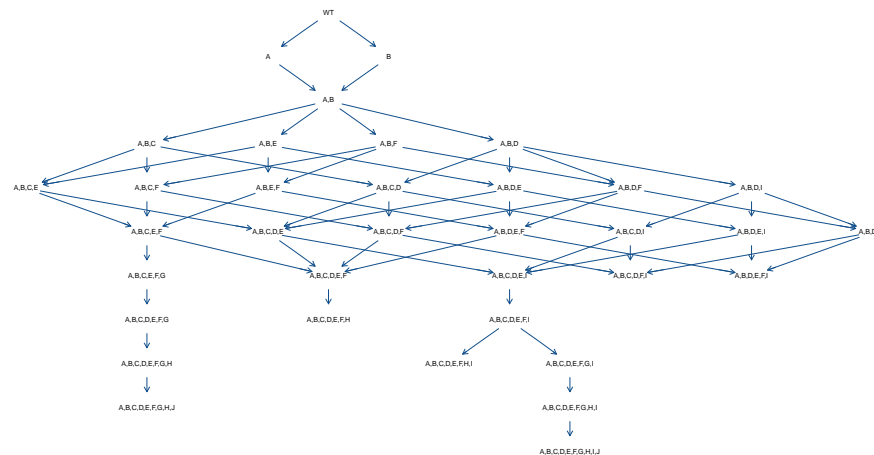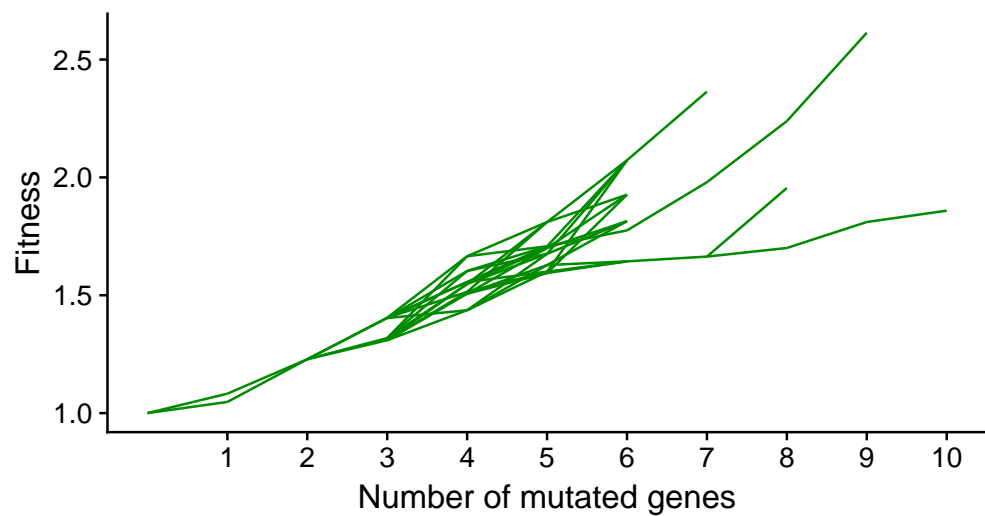

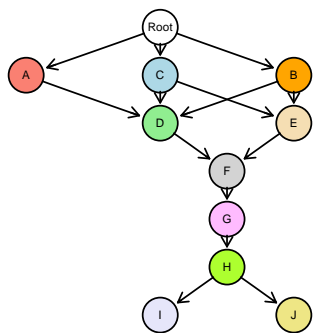

ID **WMUVgmnyiqxYFBg6**  
 acc genotypes **18**  
 peaks no back 2  
 removed edges 2  
 prop rem edges 0.08

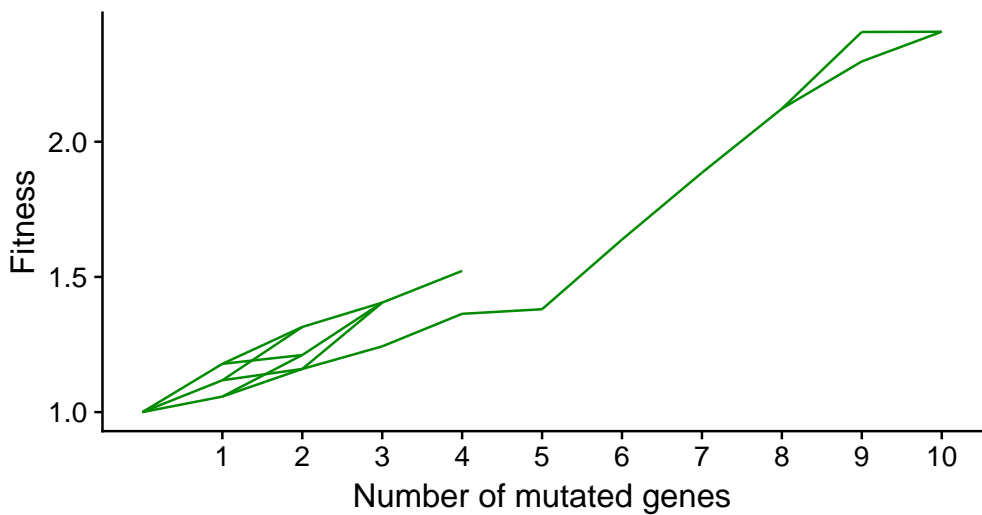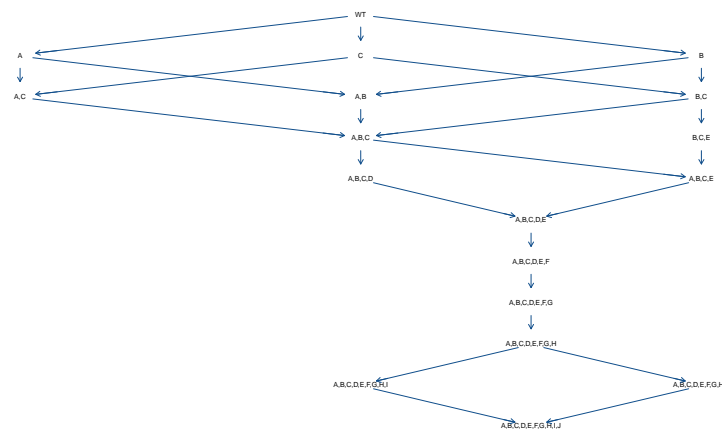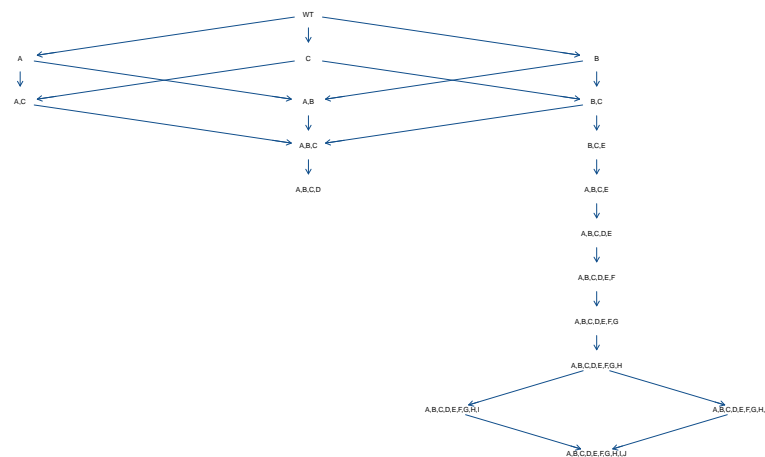

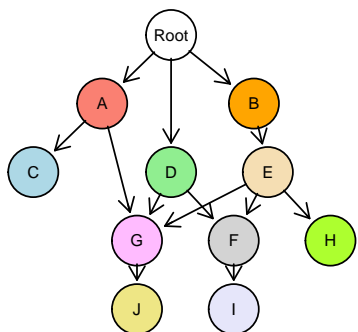

ID **WNDLFWNiHctCAAKK**  
 acc genotypes **60**  
 peaks no back **7**  
 removed edges **24**  
 prop rem edges **0.176**

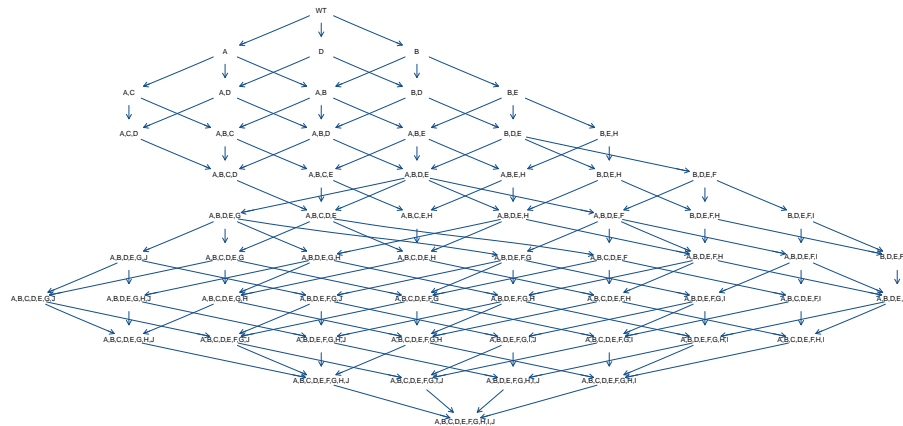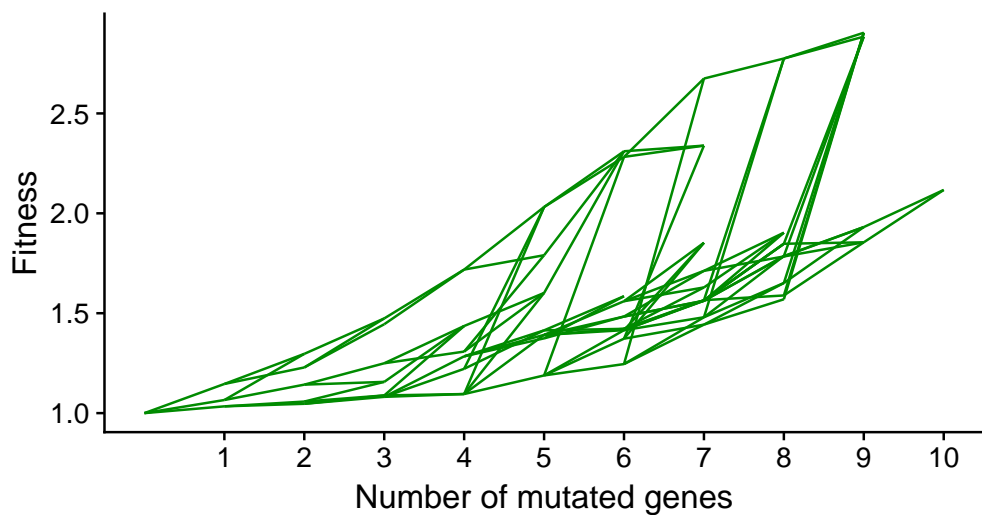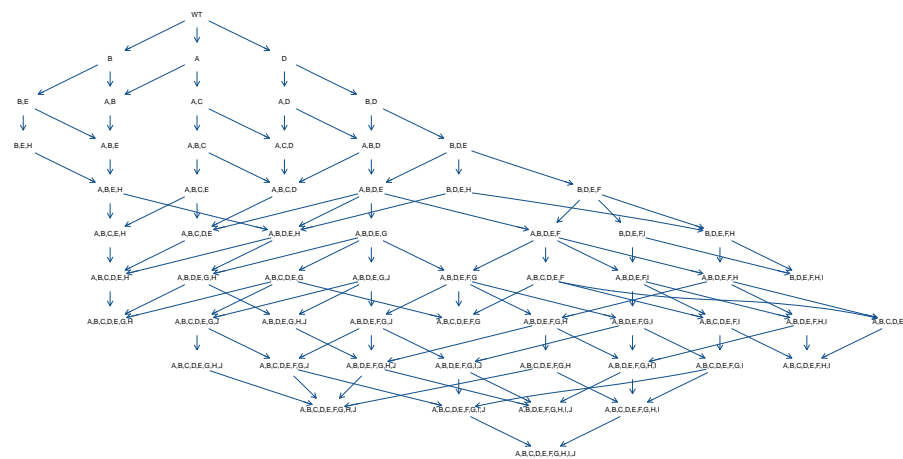



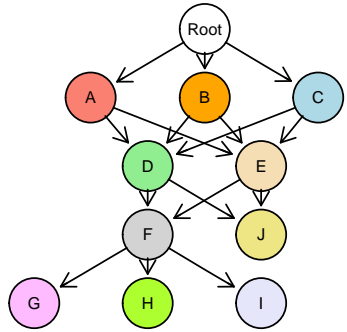

ID wrYzolphOzxMG9bWu  
 acc genotypes 28  
 peaks no back 4  
 removed edges 6  
 prop rem edges 0.118

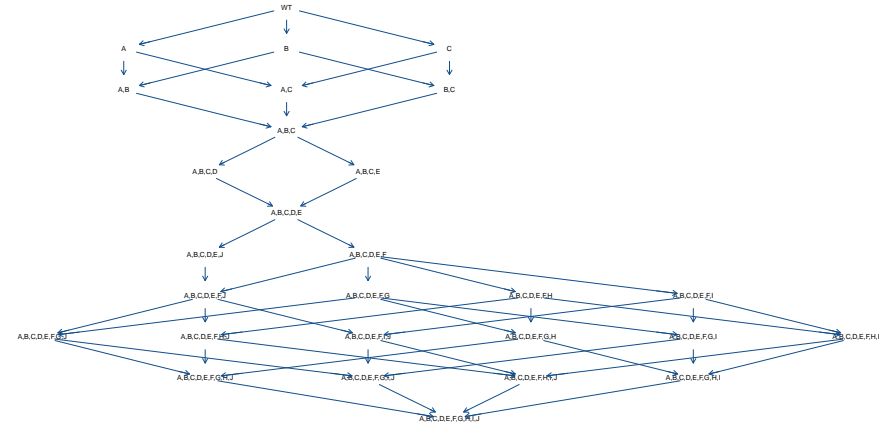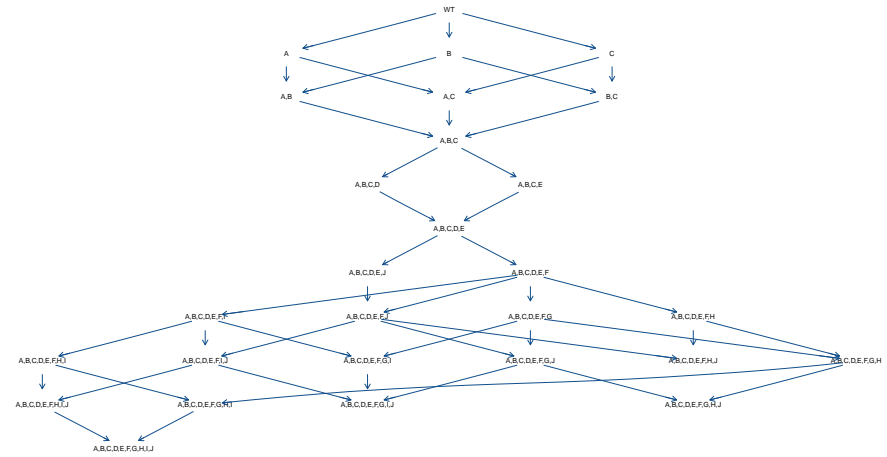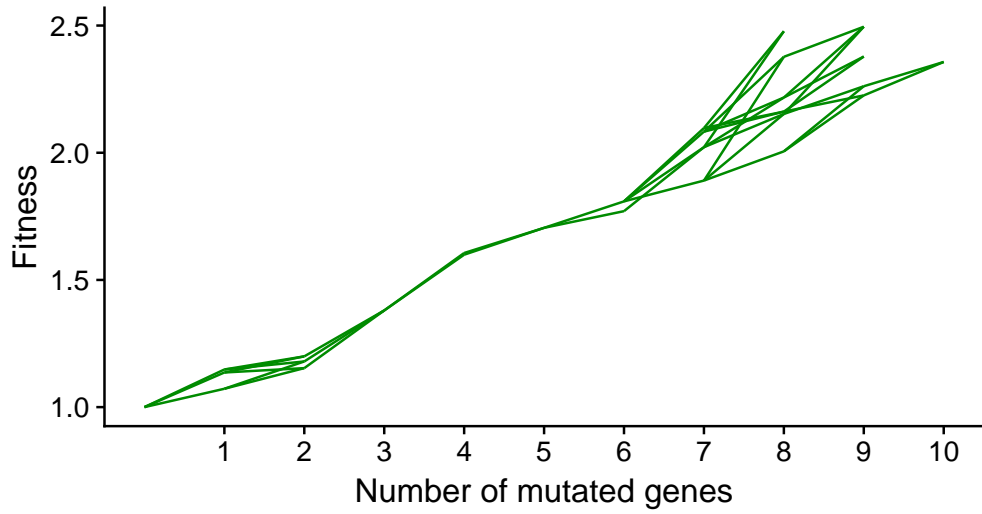

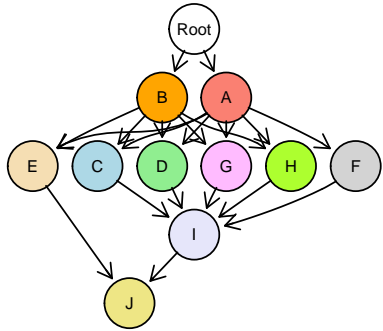

ID [ws10WbhFUWR9mXKoe](#)  
 acc genotypes 71  
 peaks no back 8  
 removed edges 29  
 prop rem edges 0.144

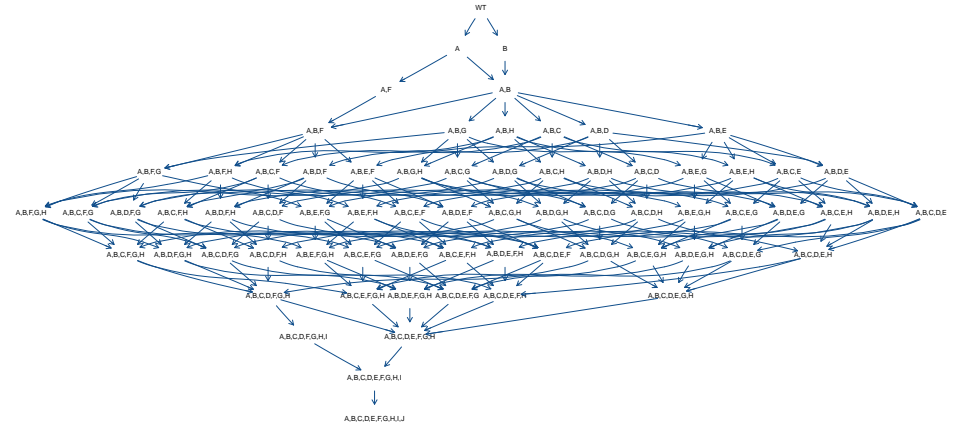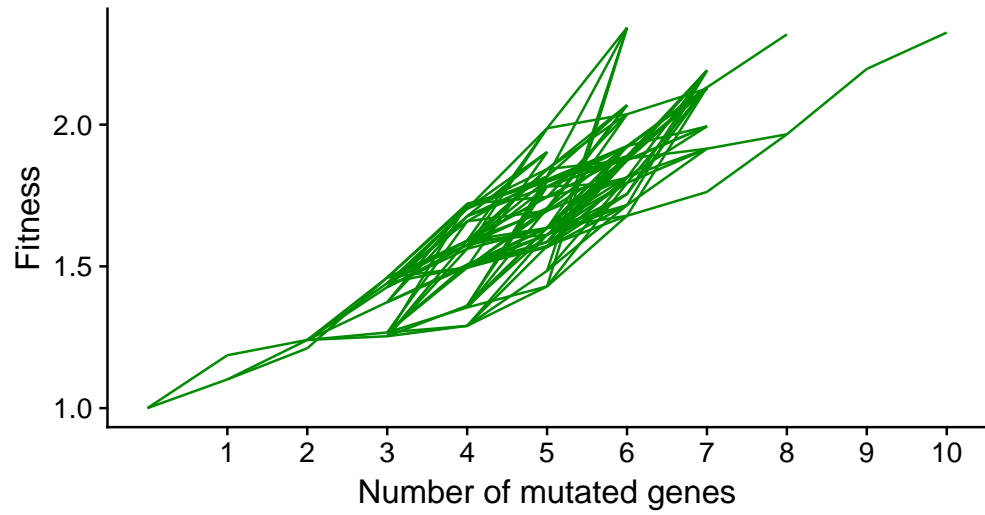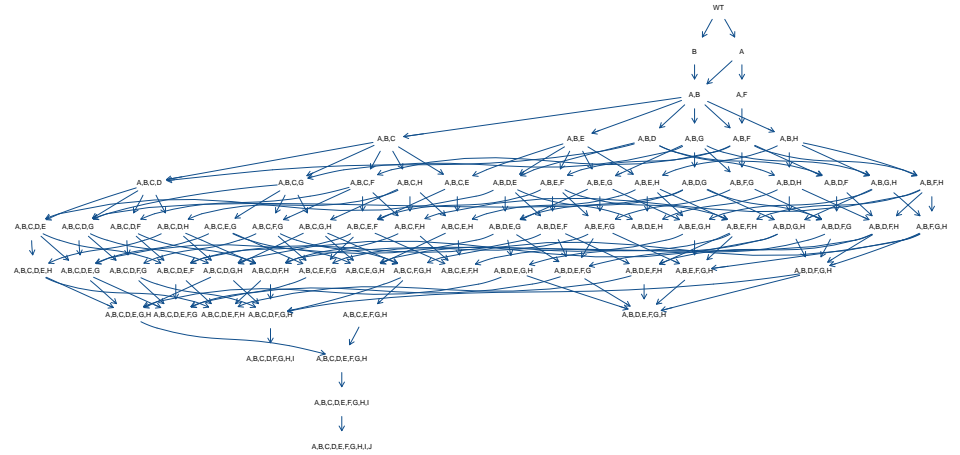



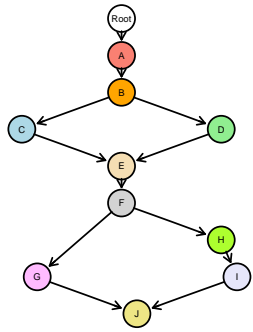

ID [Xajlk5zcAsLjK9cr](#)  
 acc genotypes 14  
 peaks no back 3  
 removed edges 2  
 prop rem edges 0.125

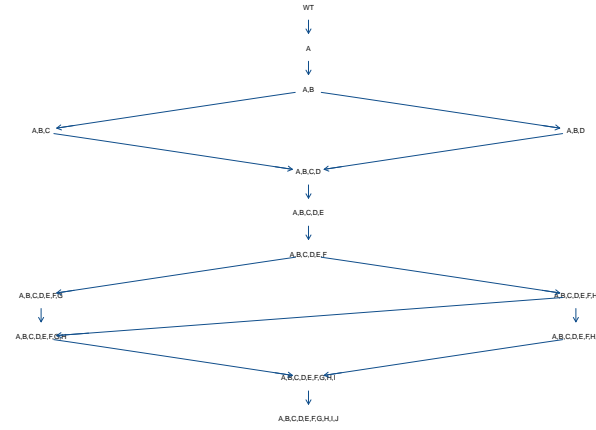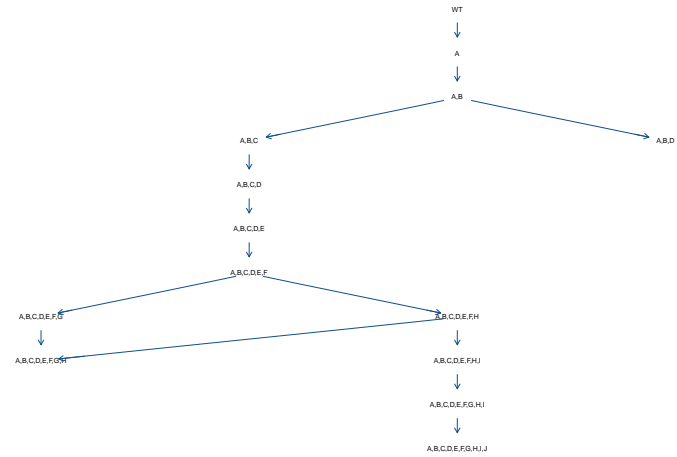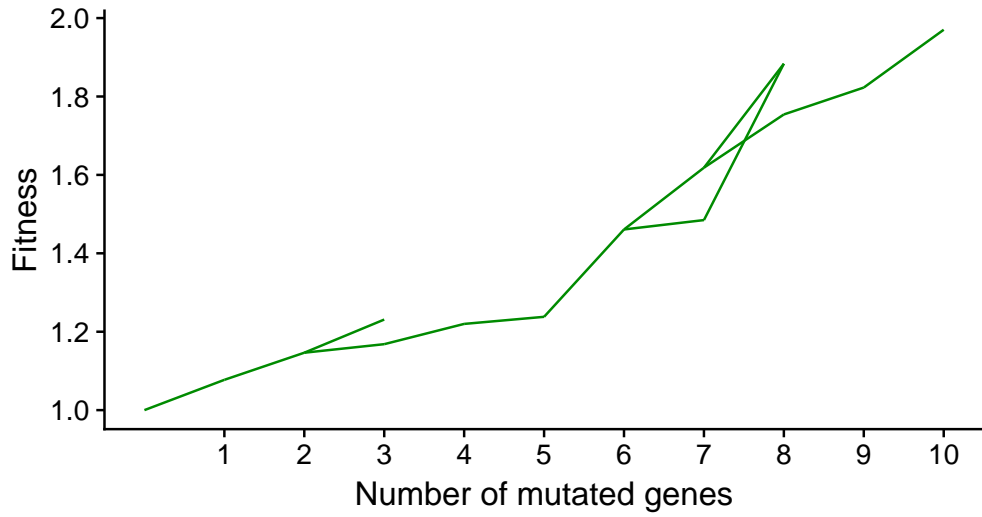



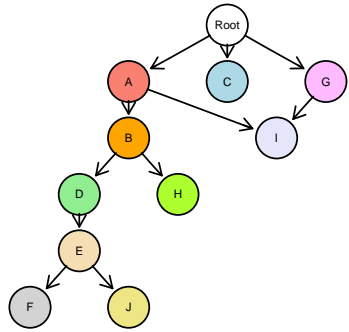

ID **XmnGrSjLnk1UkGT5**  
 acc genotypes **82**  
 peaks no back **12**  
 removed edges **57**  
 prop rem edges **0.268**

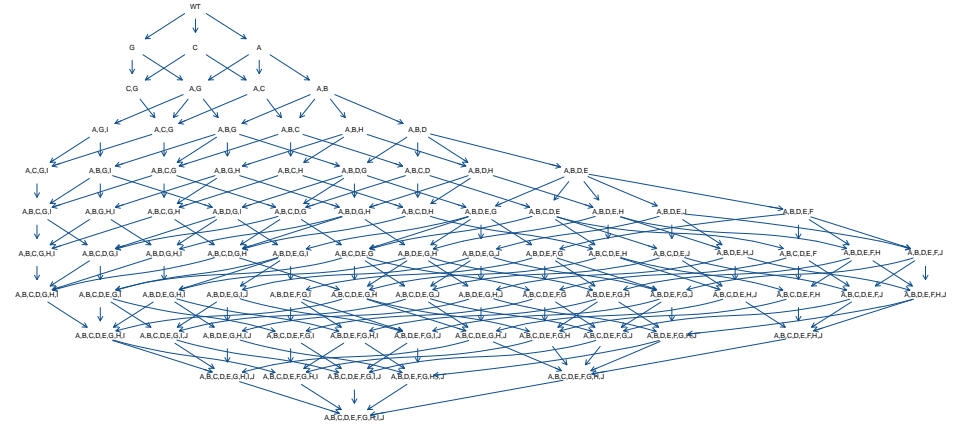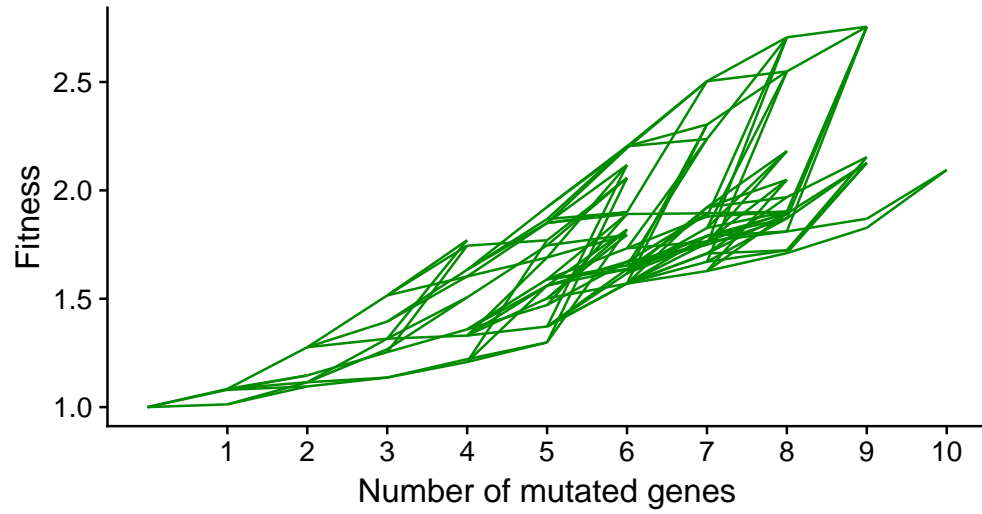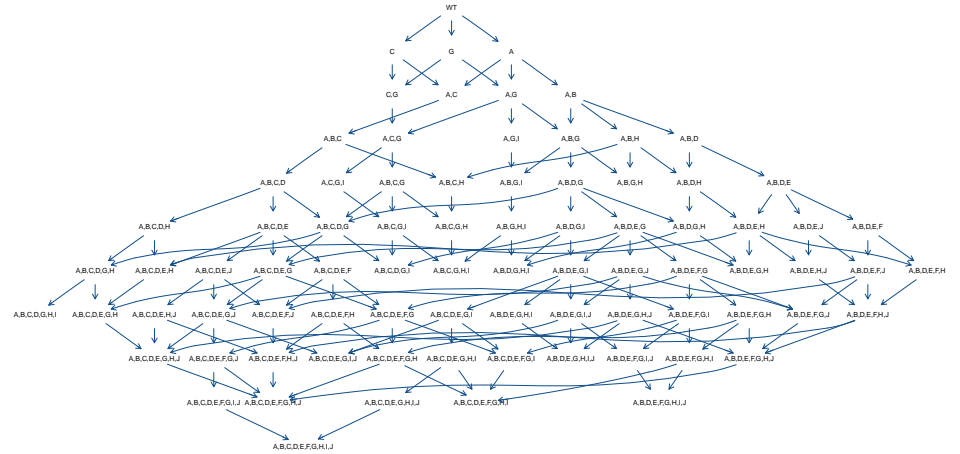

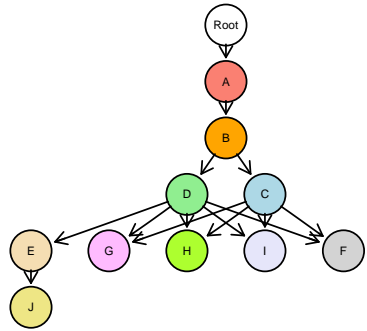

ID **y8uUVSfWKcZQiY4y**  
 acc genotypes **55**  
 peaks no back **8**  
 removed edges **22**  
 prop rem edges **0.159**

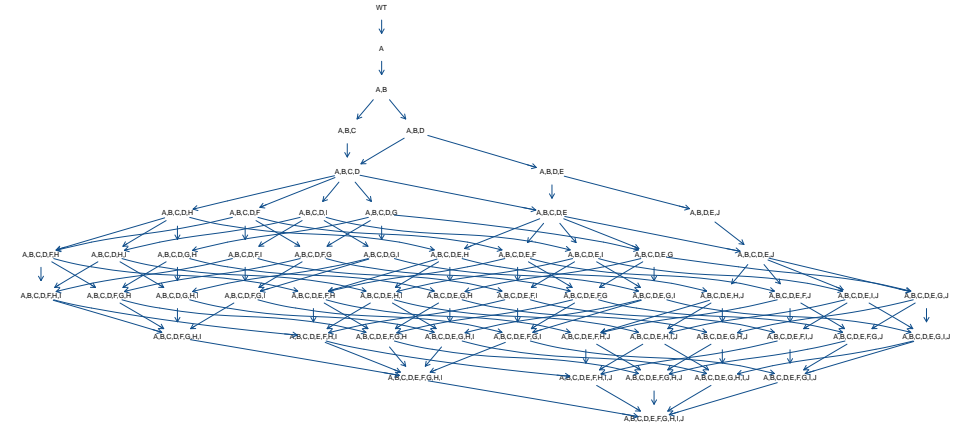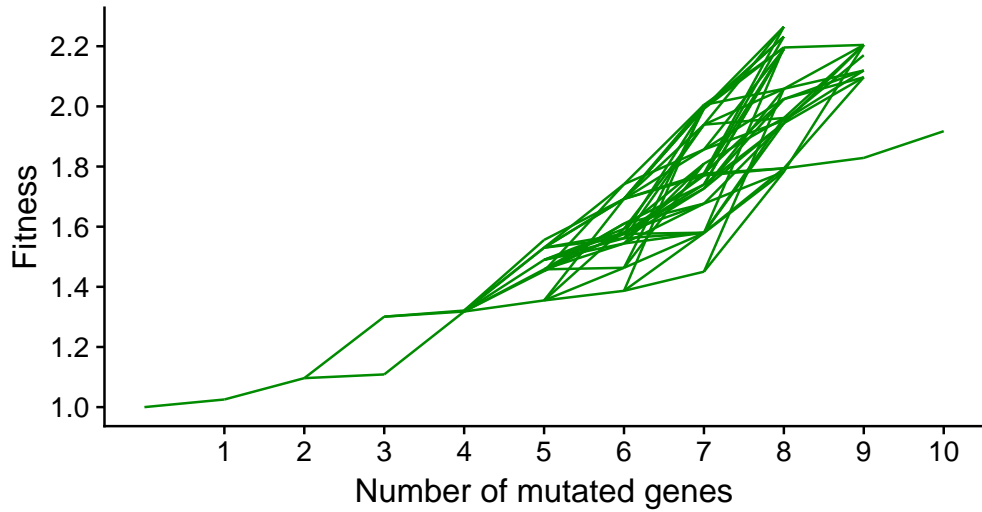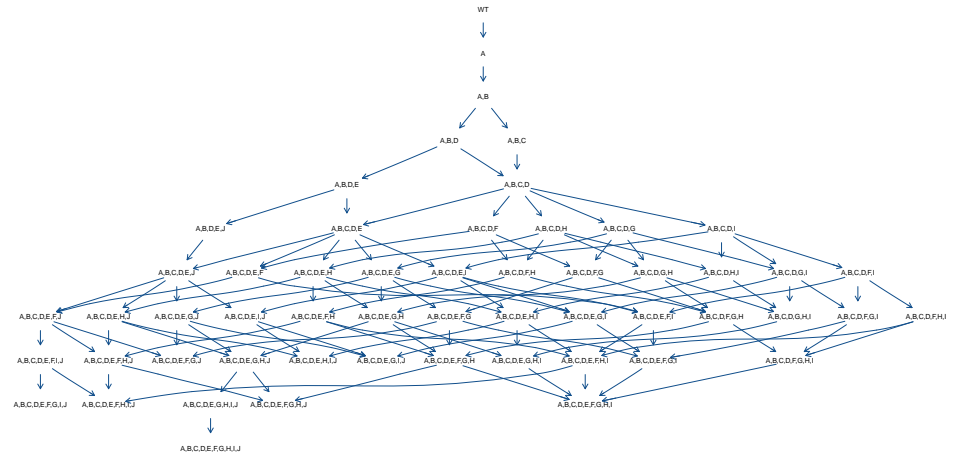

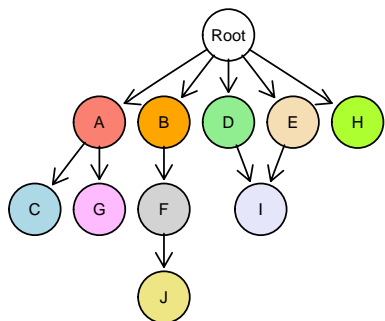

ID **ypRiC10Qof6jAjsVJ**  
 acc genotypes **200**  
 peaks no back **18**  
 removed edges **112**  
 prop rem edges **0.172**

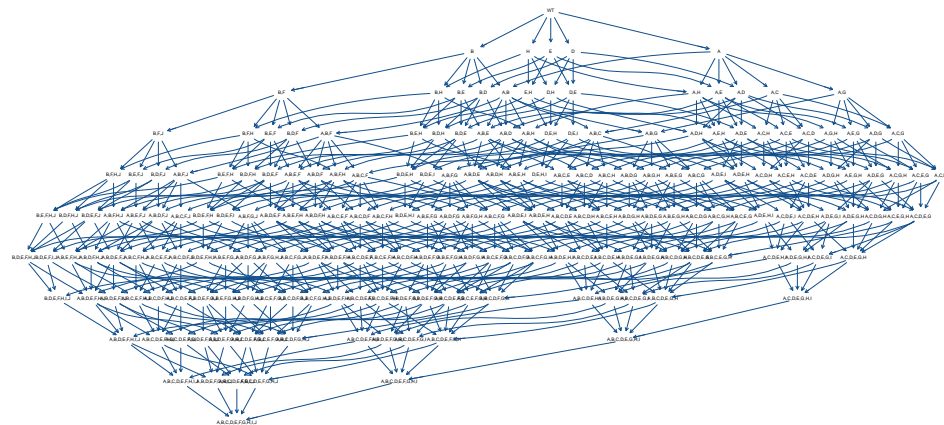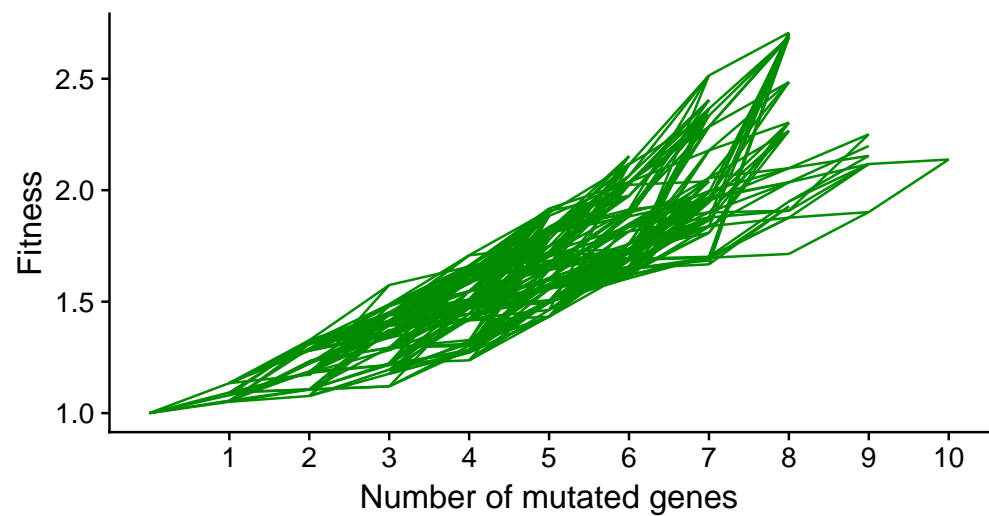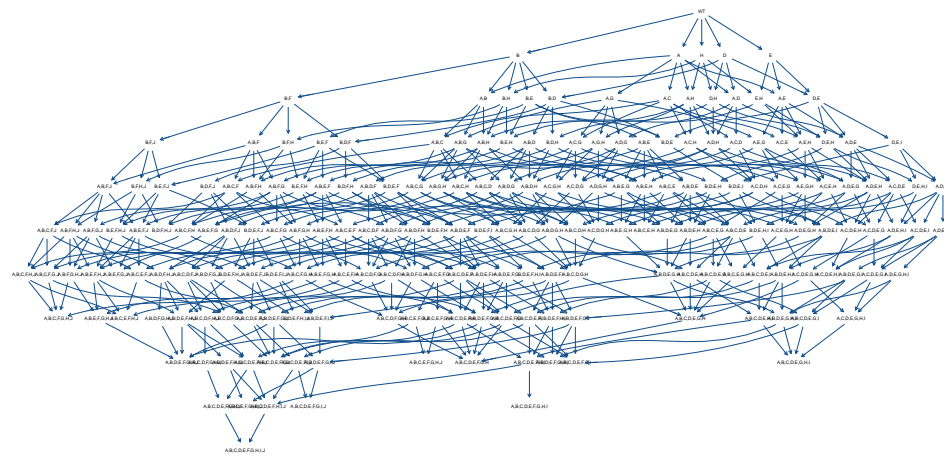



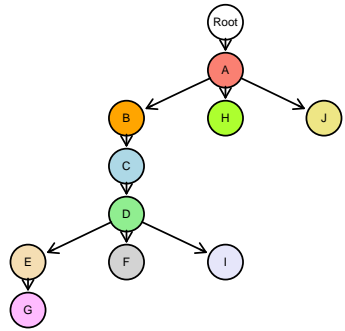

ID YW7KQxwKMe2i7ar  
 acc genotypes 61  
 peaks no back 9  
 removed edges 28  
 prop rem edges 0.183

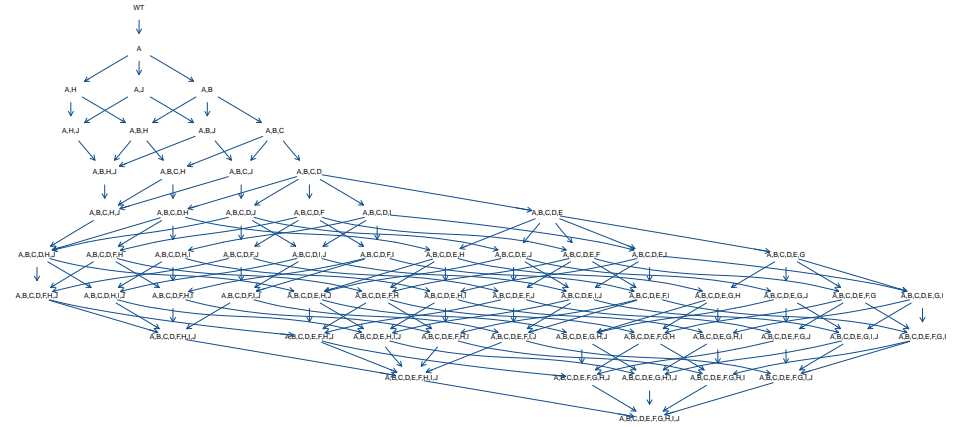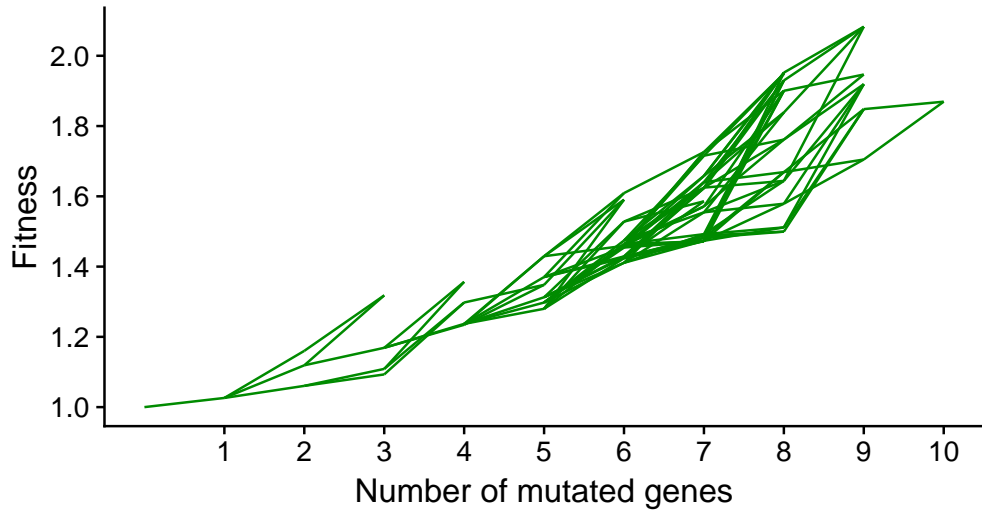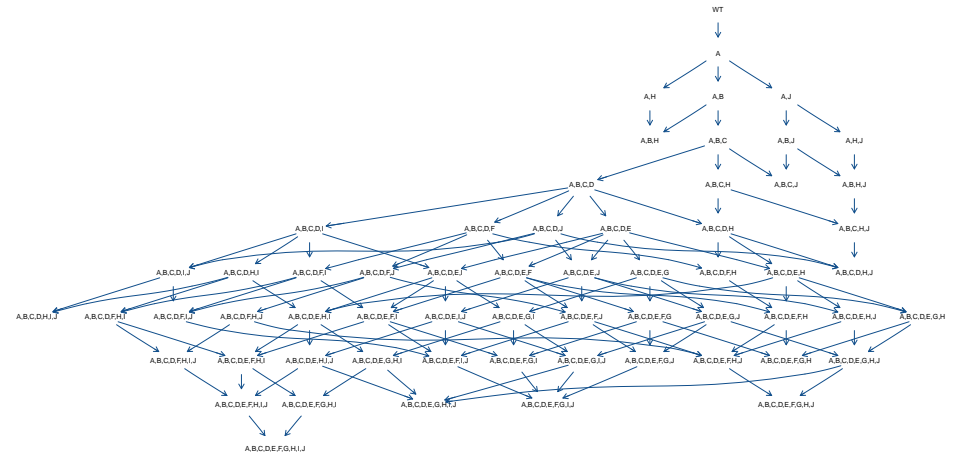

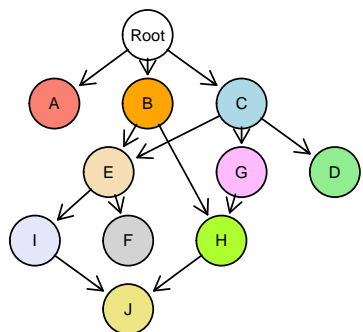

ID **z4RVEoFHLg5dwFWI**  
 acc genotypes **80**  
 peaks no back **9**  
 removed edges **44**  
 prop rem edges **0.212**

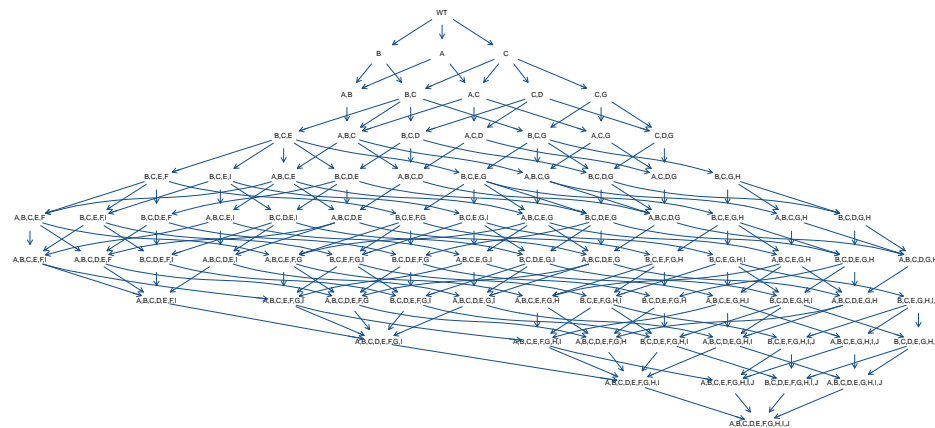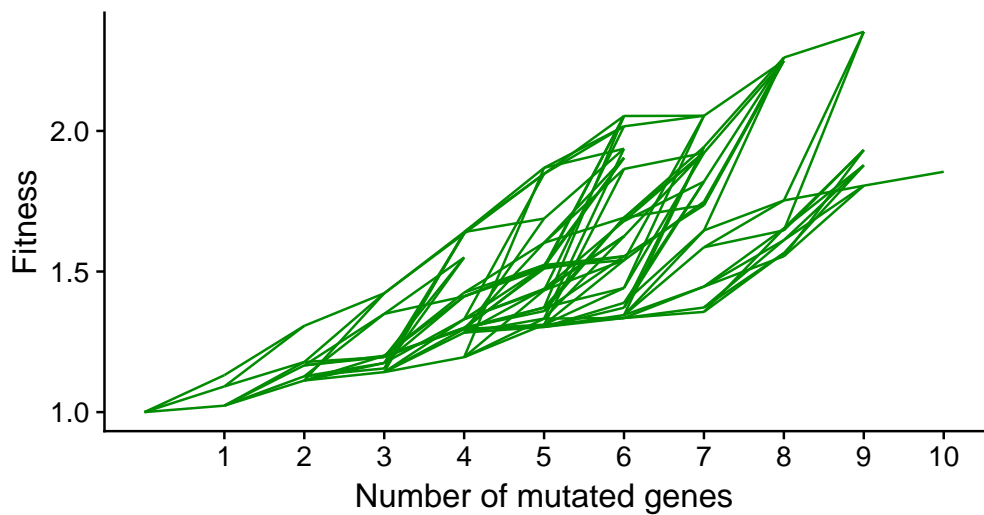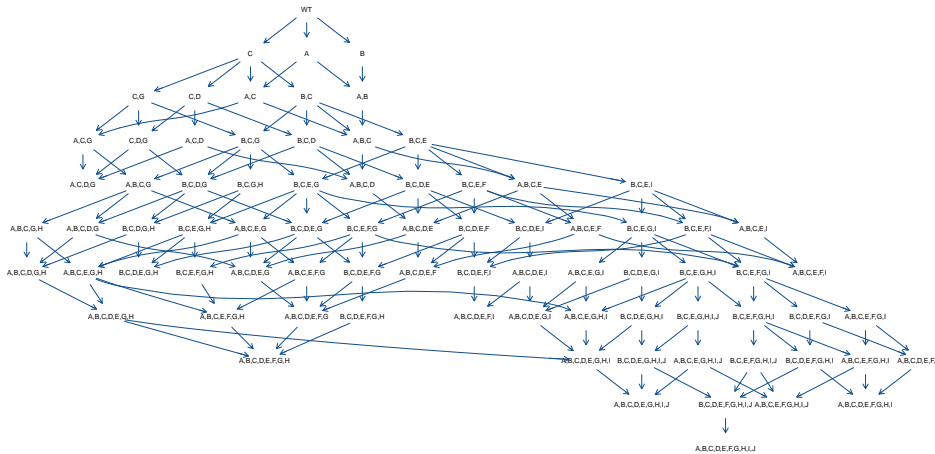

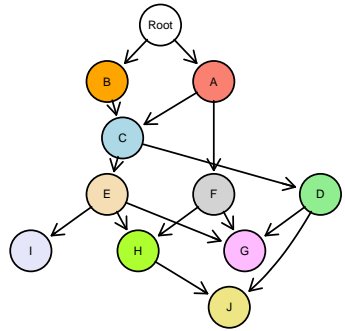

ID **zAMK2D5LDmq9X37r**  
 acc genotypes **30**  
 peaks no back **2**  
 removed edges **3**  
 prop rem edges **0.057**

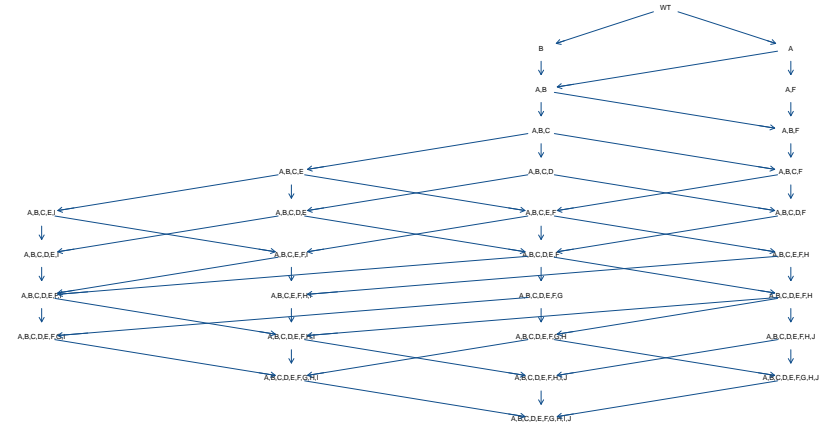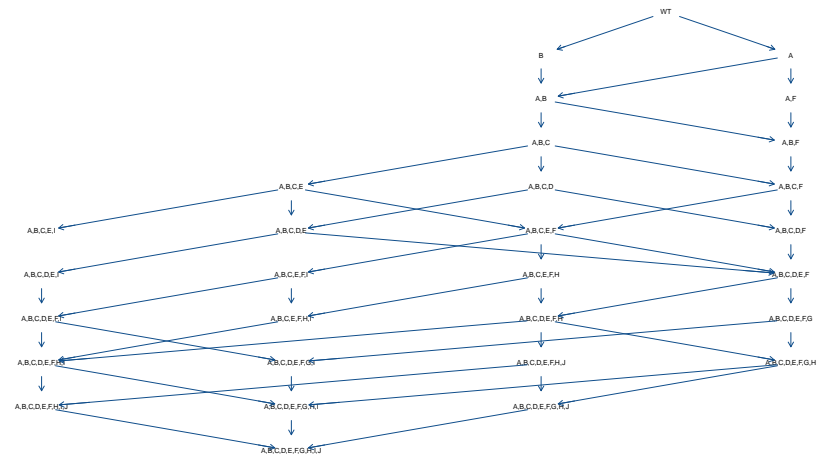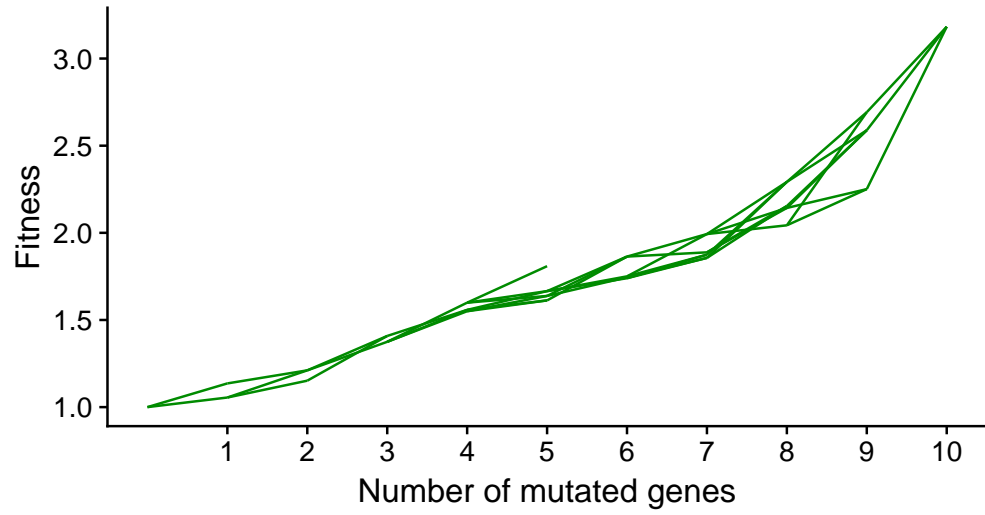

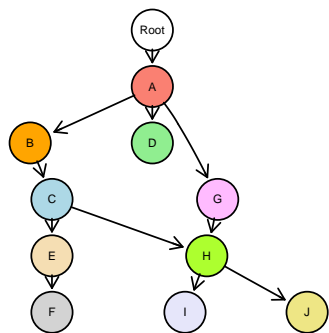

ID **ZlBdVWiOnxT3sPfl**  
 acc genotypes **45**  
 peaks no back **7**  
 removed edges **11**  
 prop rem edges **0.116**

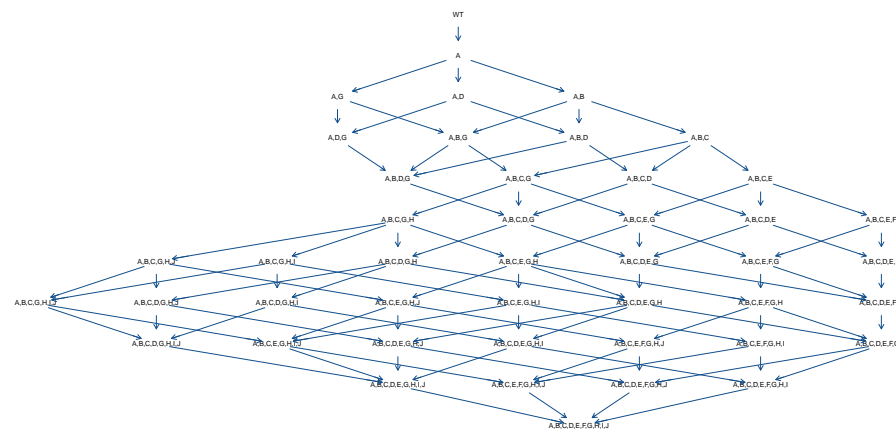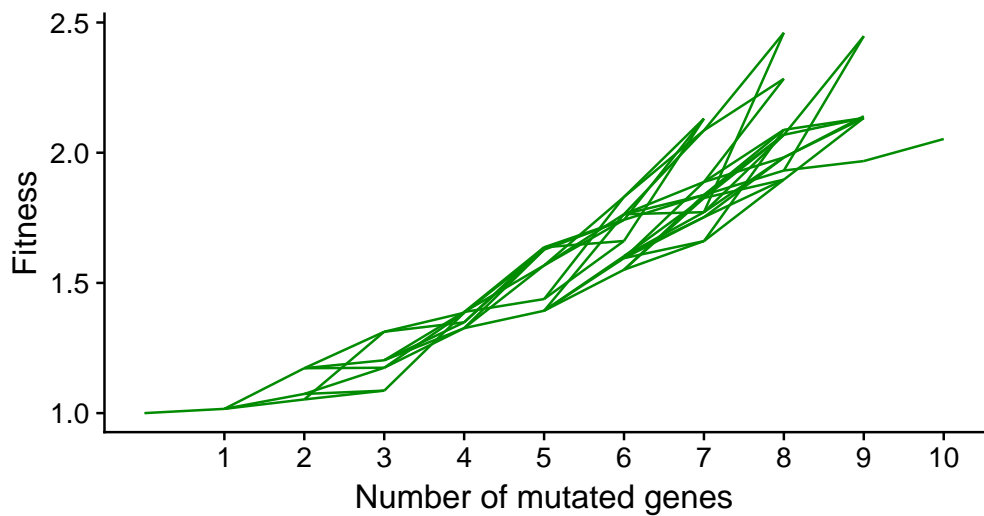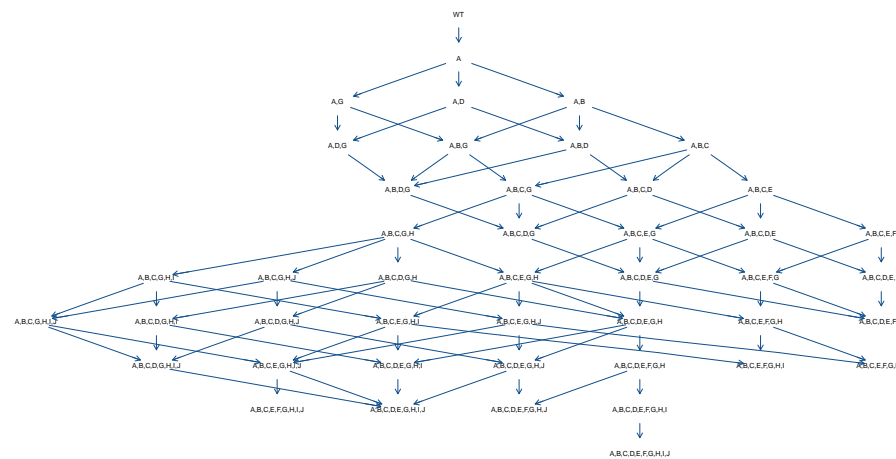

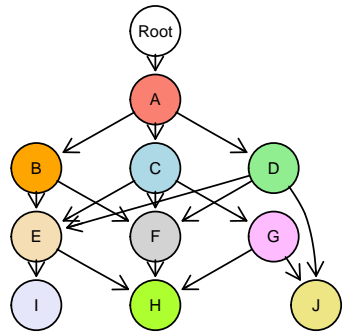

ID [zJtfsaG9cK5j5Hnm](#)  
 acc genotypes 34  
 peaks no back 5  
 removed edges 12  
 prop rem edges 0.19

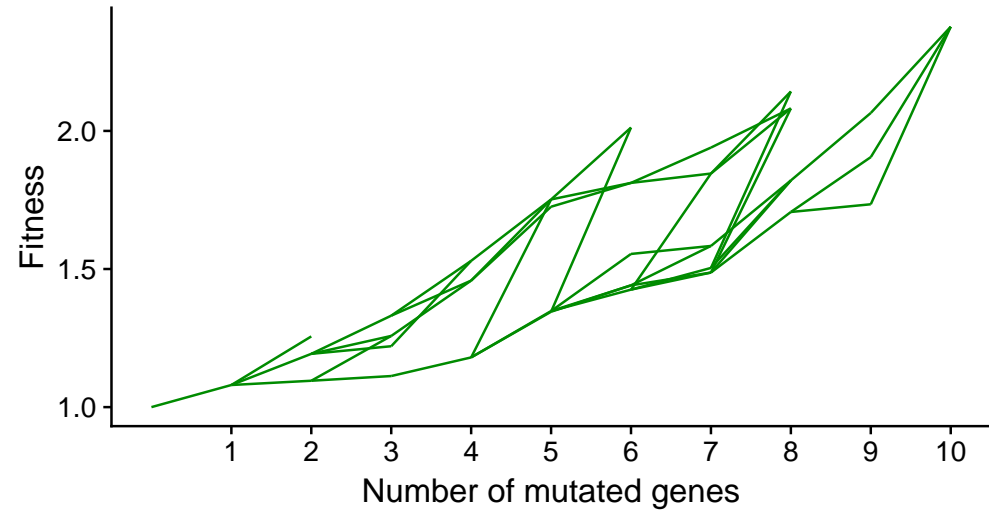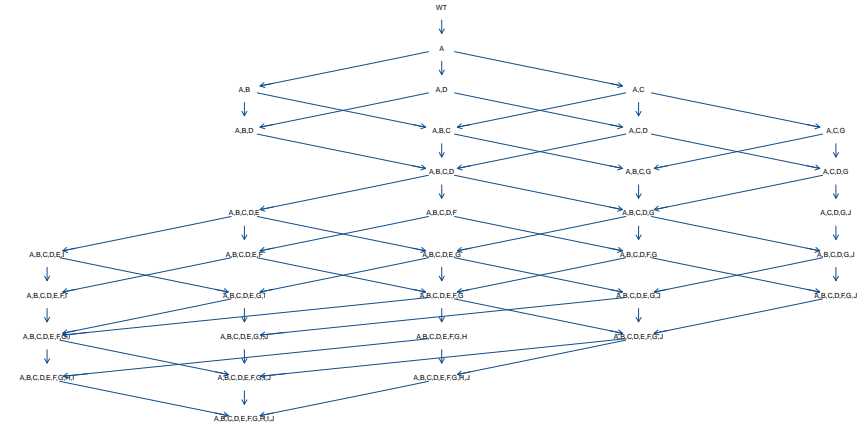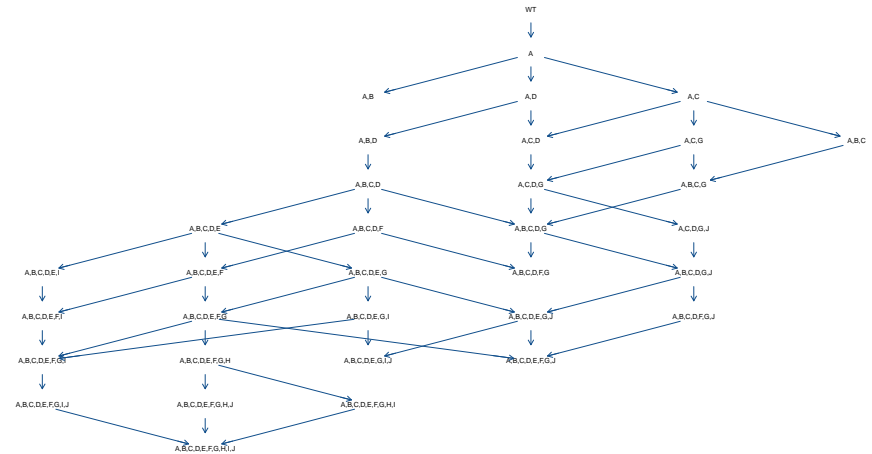

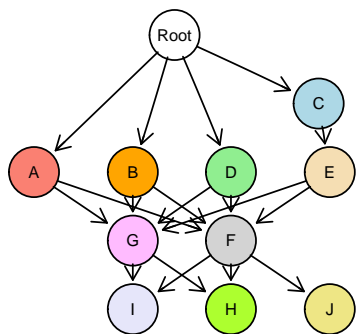

ID **ZKH10YvDZGVfsdHAY**  
 acc genotypes **35**  
 peaks no back **6**  
 removed edges **9**  
 prop rem edges **0.129**

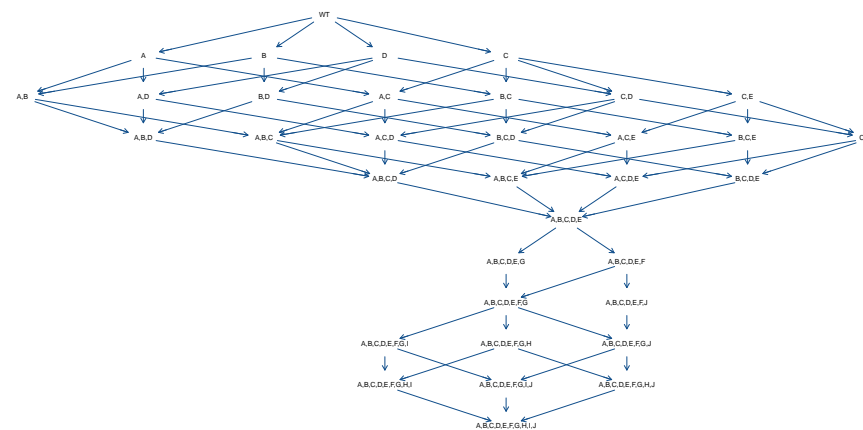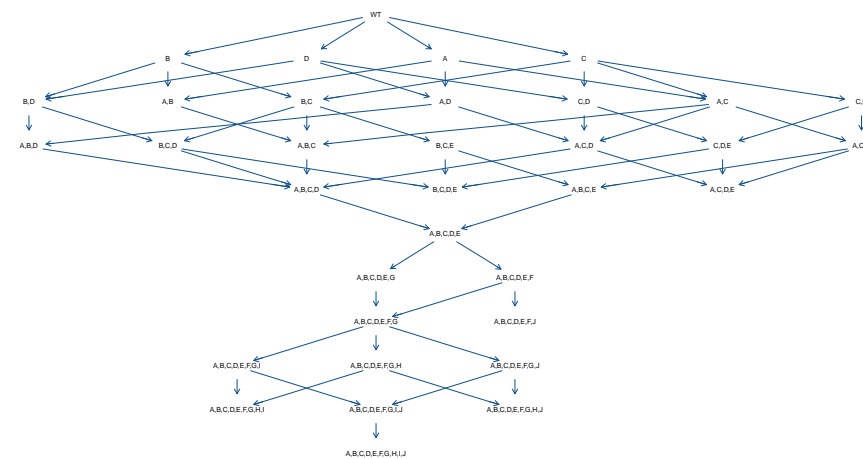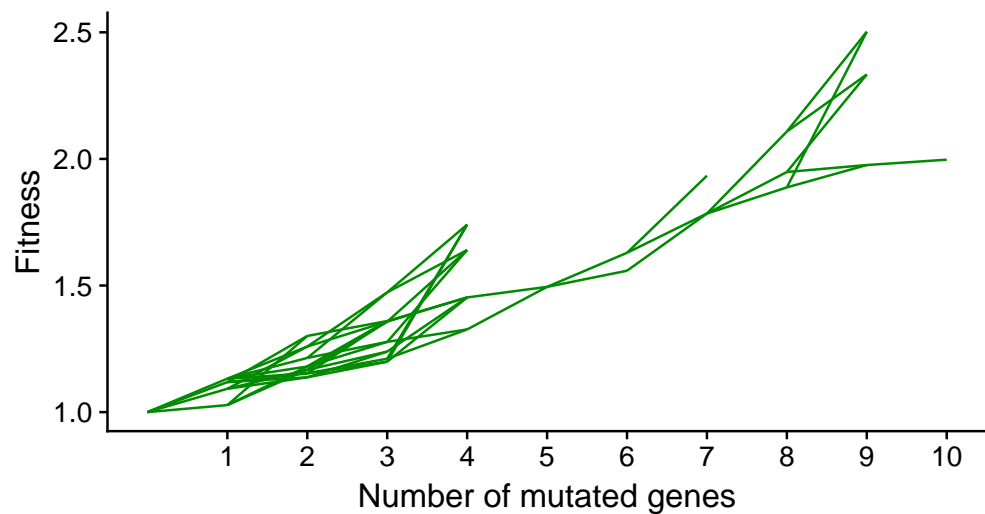



ID 10aJ10EAqKH7VA3ccp  
 acc genotypes 79  
 peaks no back 26  
 removed edges NA  
 prop rem edges NA

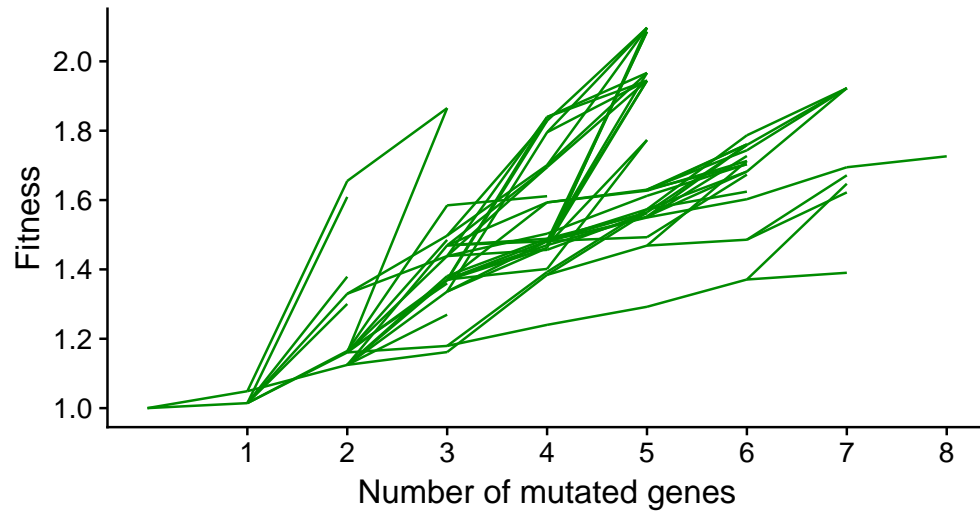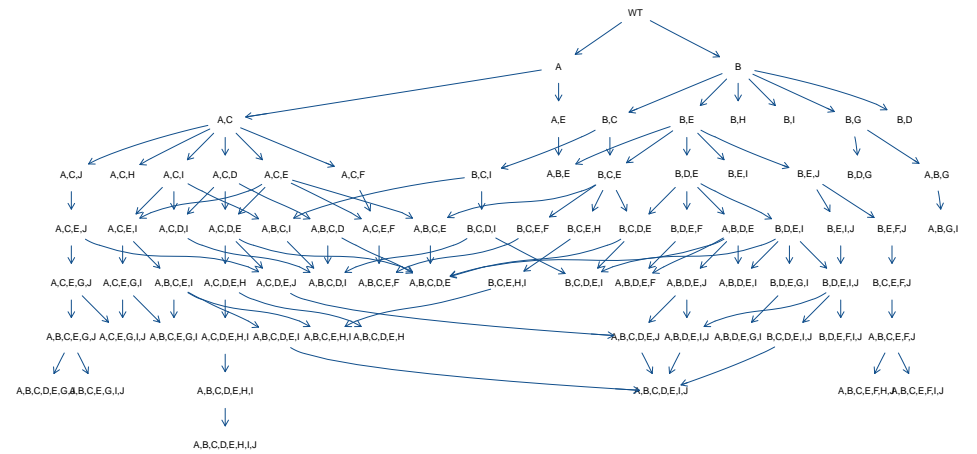



ID 10fyev4yPOAHqV3G4  
 acc genotypes 72  
 peaks no back 33  
 removed edges NA  
 prop rem edges NA

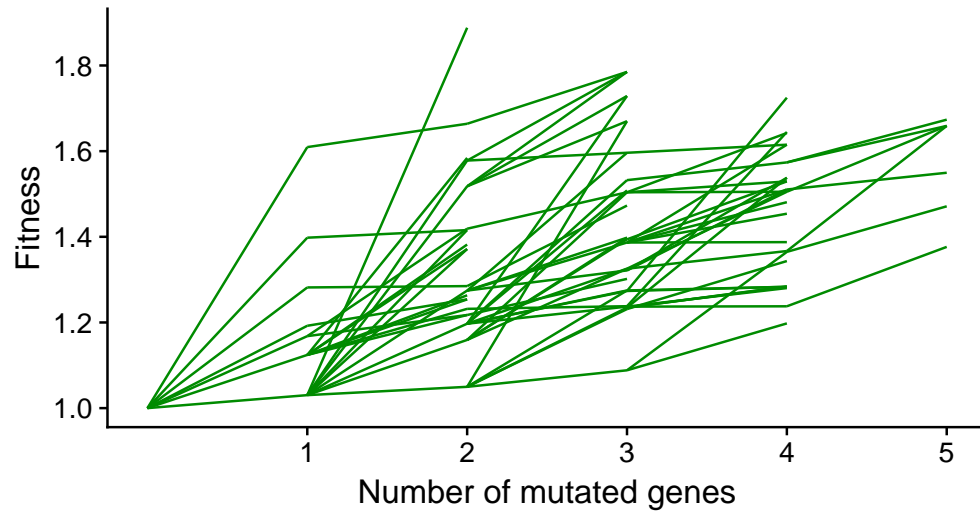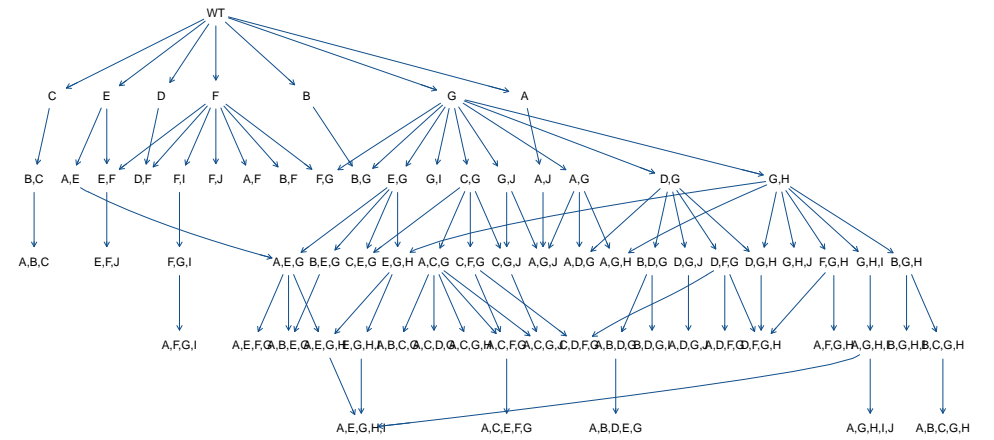

*ID* 10NjHwdZ4eQZuBASX  
*acc genotypes* 326  
*peaks no back* 116  
*removed edges* NA  
*prop rem edges* NA

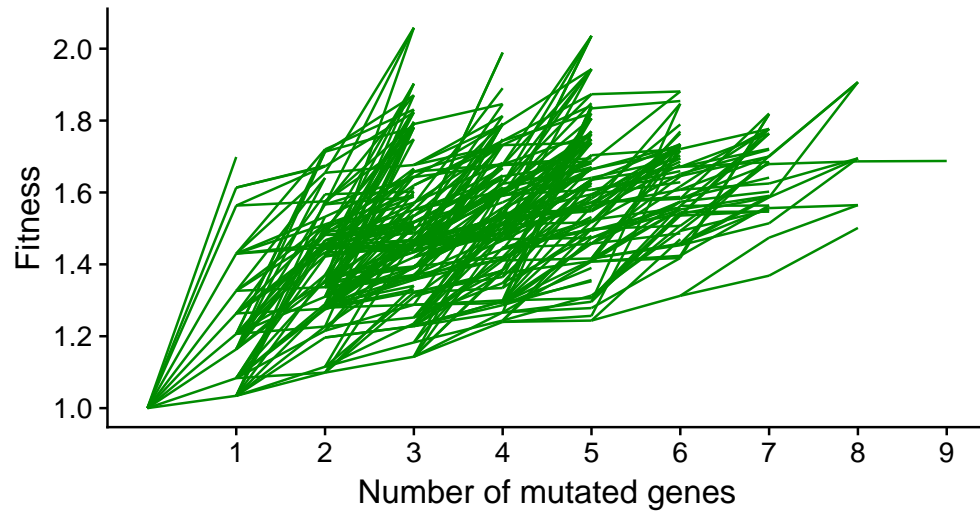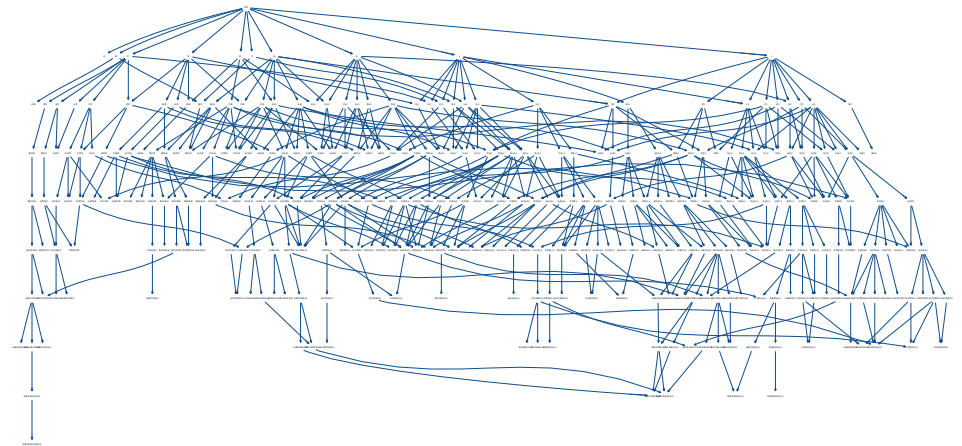

*ID* 10rm10ycggF6sUPqCV  
*acc genotypes* 330  
*peaks no back* 87  
*removed edges* NA  
*prop rem edges* NA

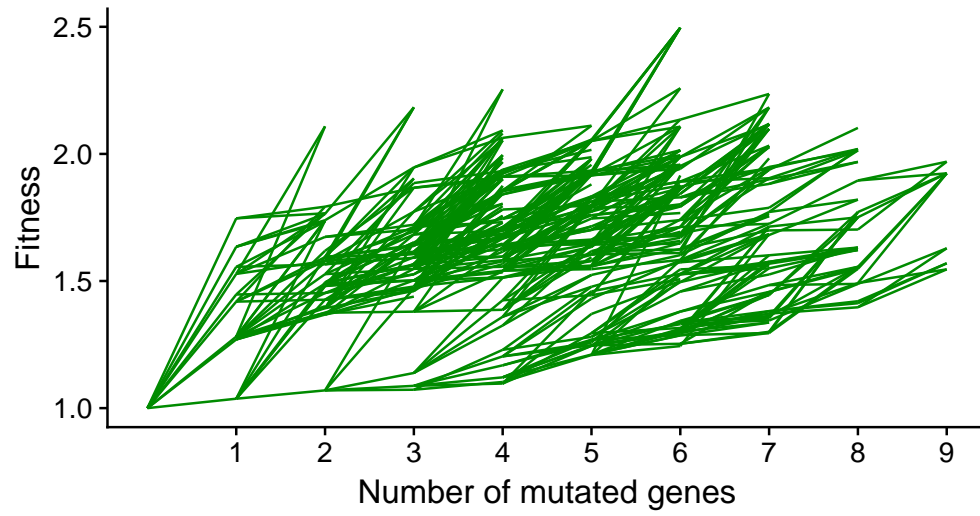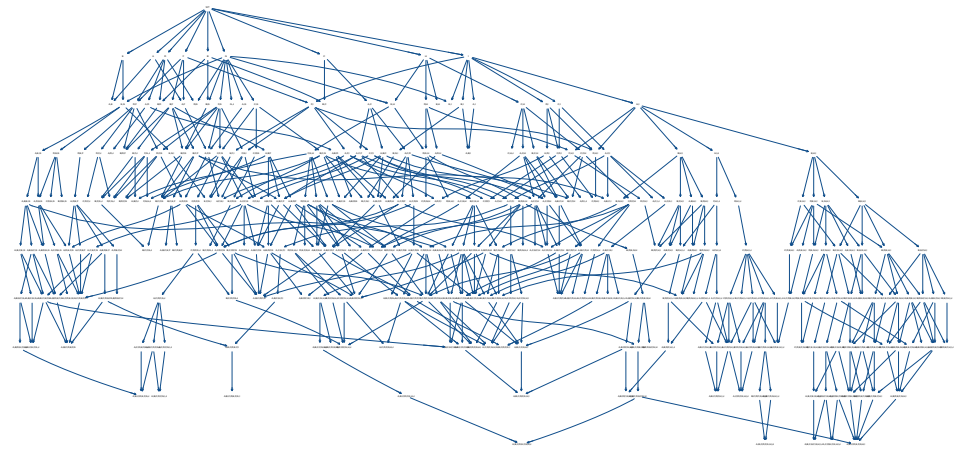

ID 10yJX7cQ5FF31Qv6f  
 acc genotypes 95  
 peaks no back 36  
 removed edges NA  
 prop rem edges NA

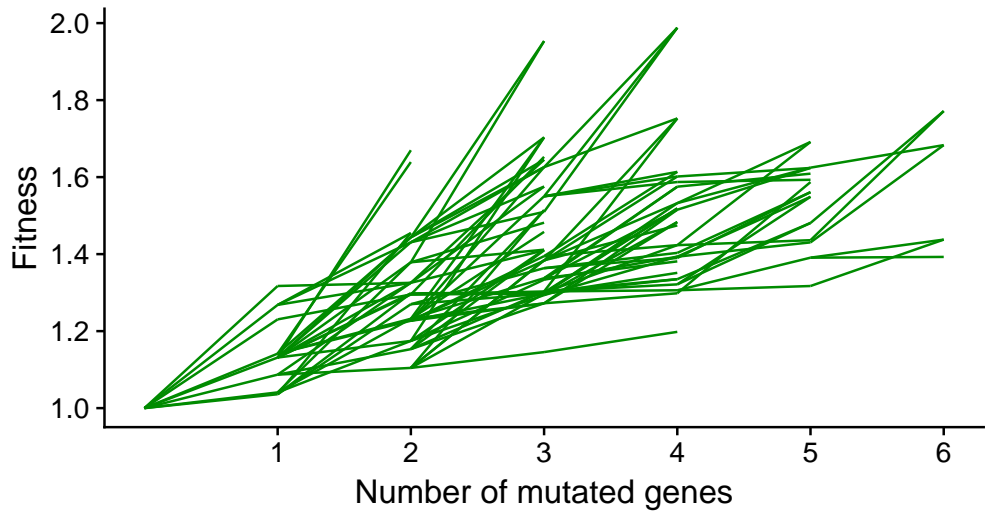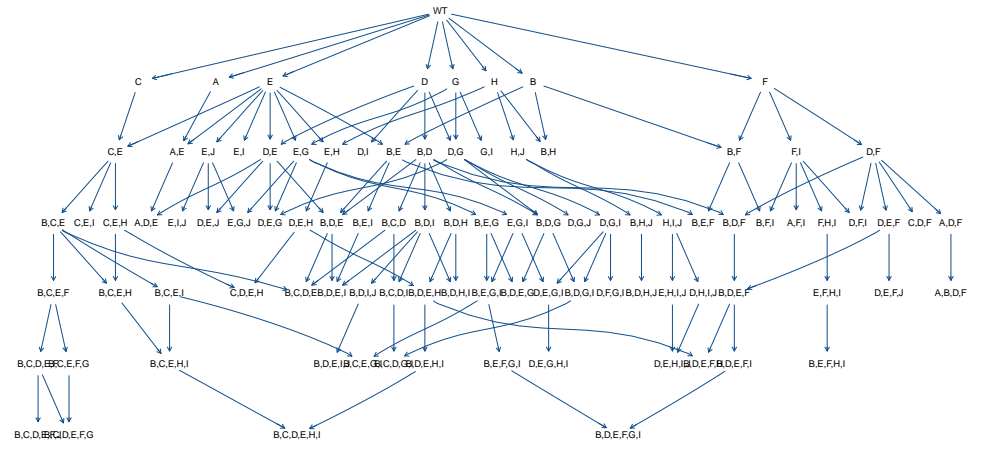

ID 1aUzp7cAshgfTICQ  
 acc genotypes 44  
 peaks no back 16  
 removed edges NA  
 prop rem edges NA

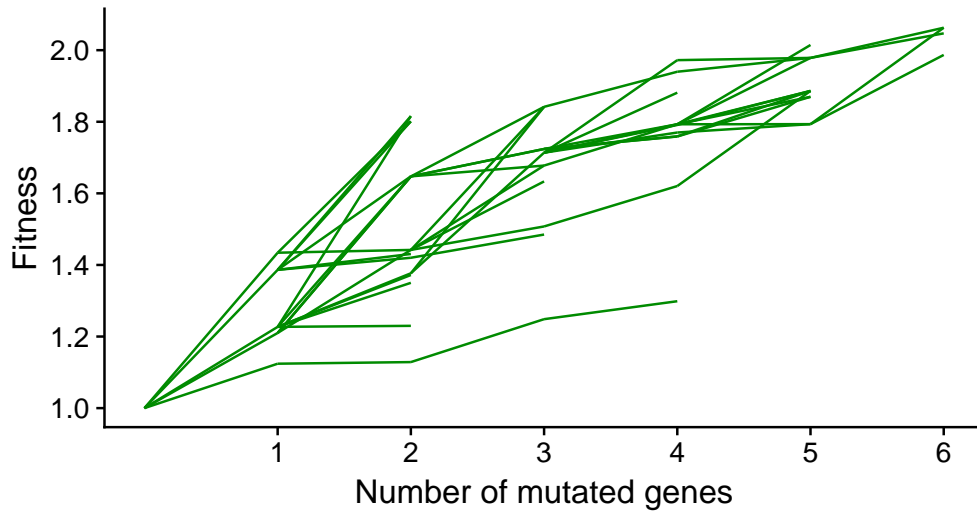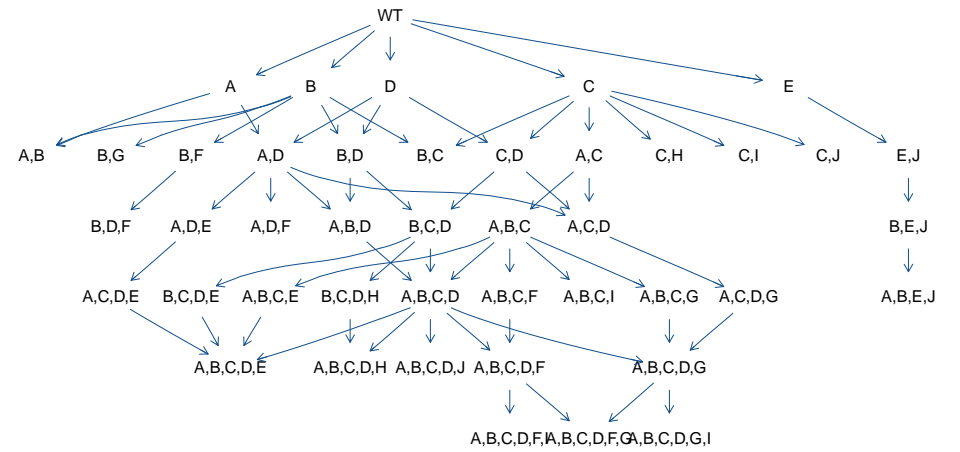

*ID* 1QFuLHW10HcmHRTX10  
*acc genotypes* 217  
*peaks no back* 81  
*removed edges* NA  
*prop rem edges* NA

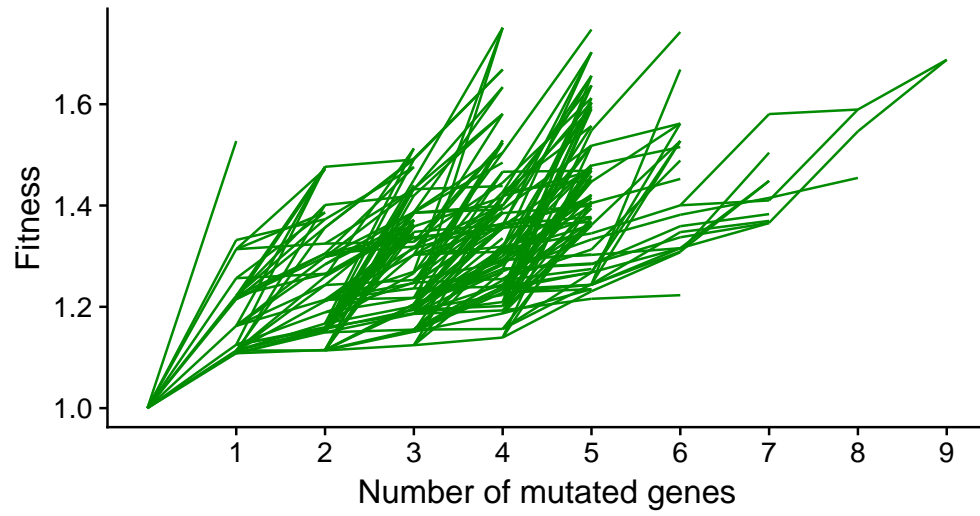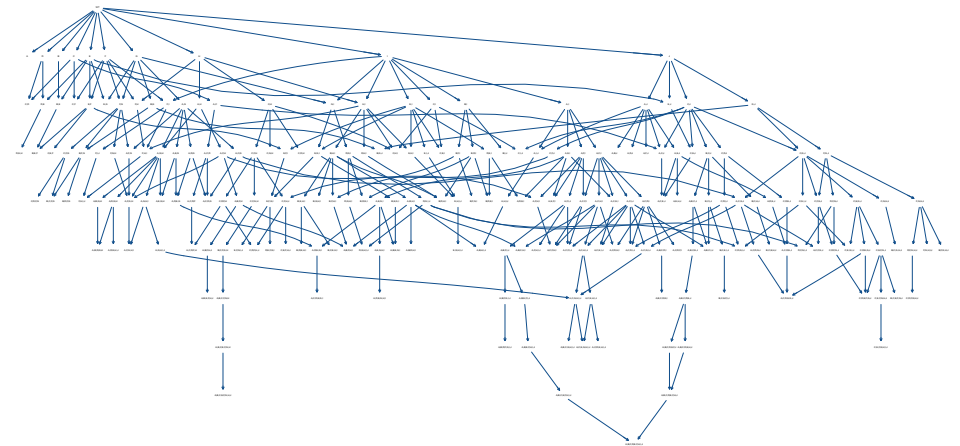

*ID* 2HoRF1oKBcGNaQYL  
*acc genotypes* 597  
*peaks no back* 113  
*removed edges* NA  
*prop rem edges* NA

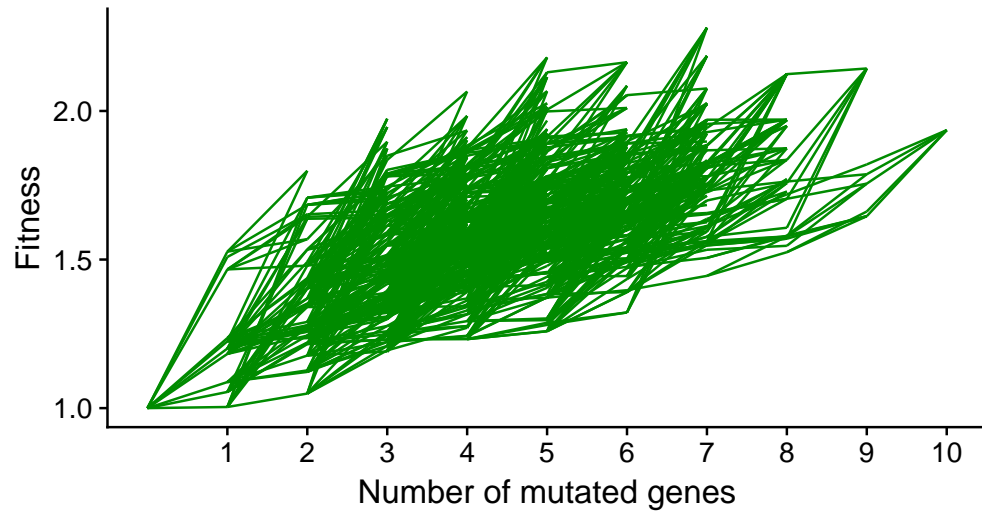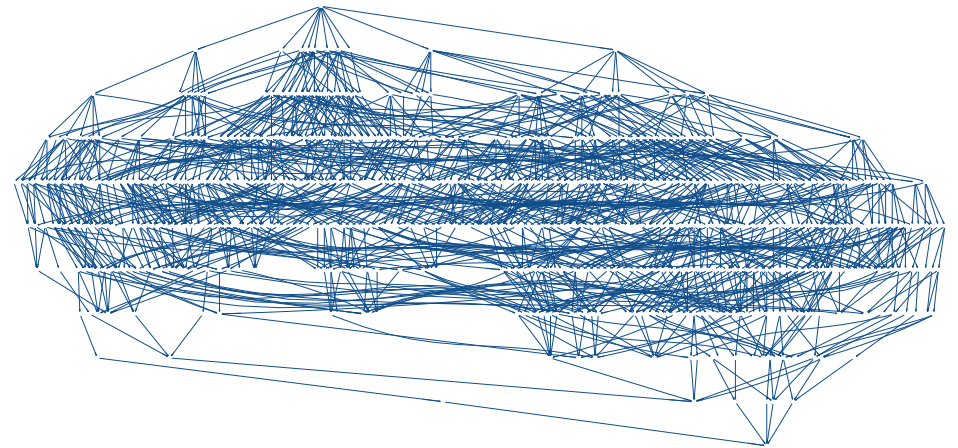

ID 2Ytm5OoPJh10Hzle  
 acc genotypes 52  
 peaks no back 13  
 removed edges NA  
 prop rem edges NA

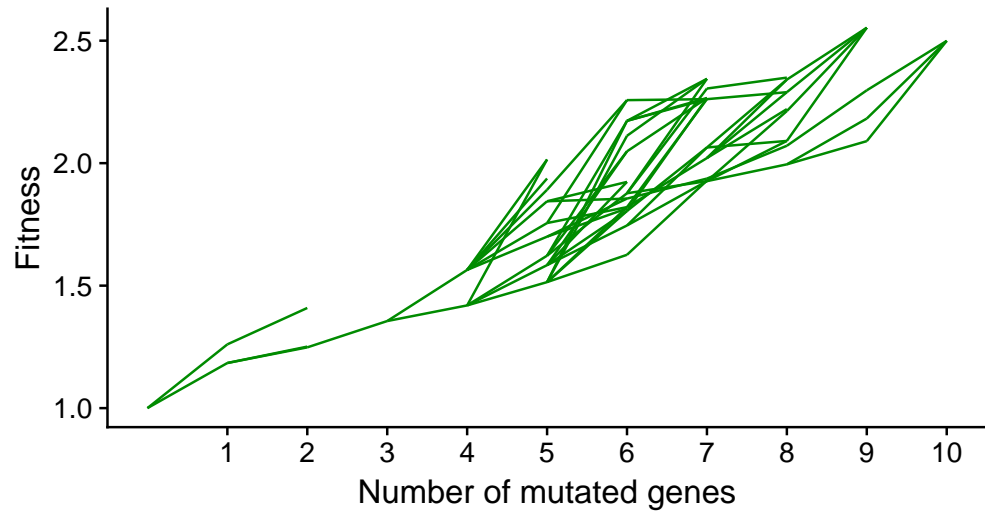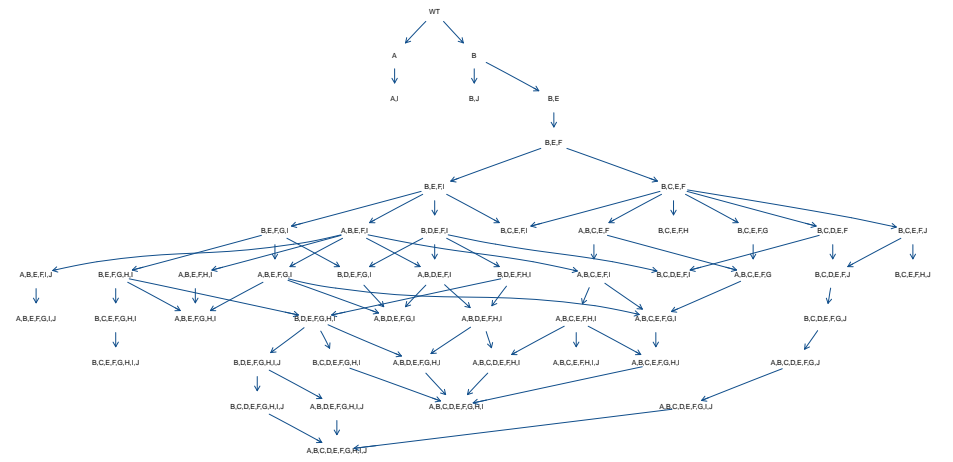



*ID* 2yuFuKxbV3XC3194  
*acc genotypes* 282  
*peaks no back* 63  
*removed edges* NA  
*prop rem edges* NA

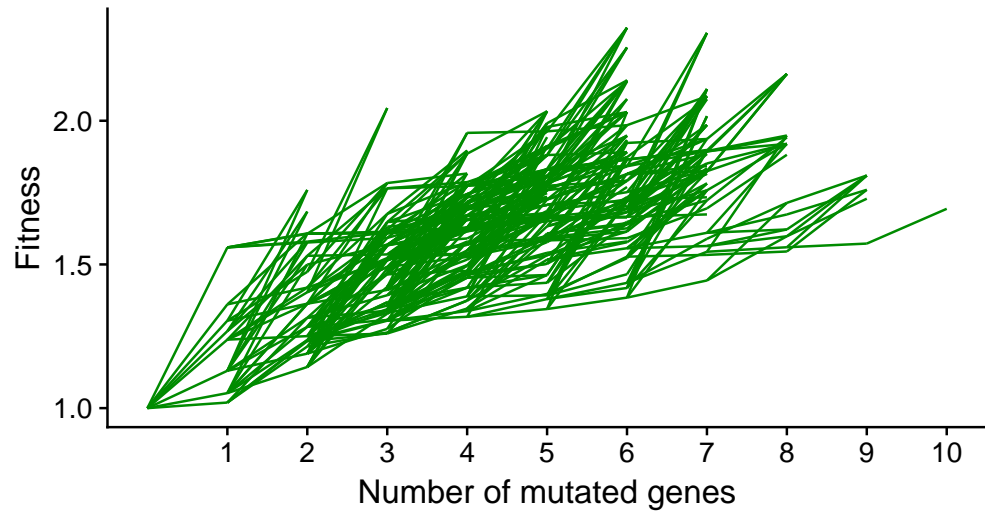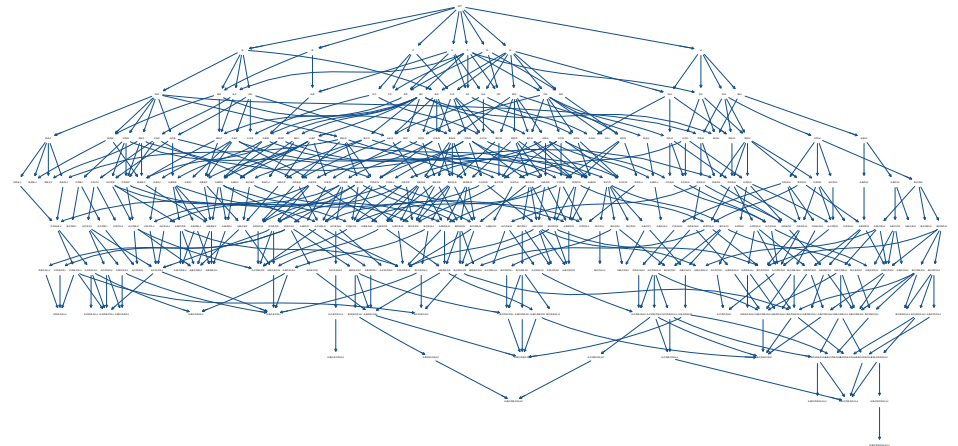

*ID* 341bQ6tMBQ3wbqIX  
*acc genotypes* 204  
*peaks no back* 68  
*removed edges* NA  
*prop rem edges* NA

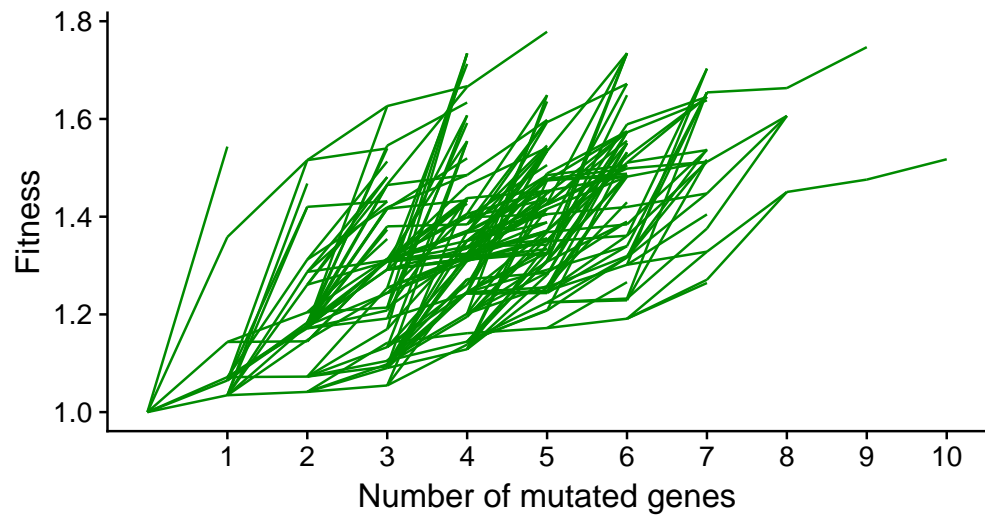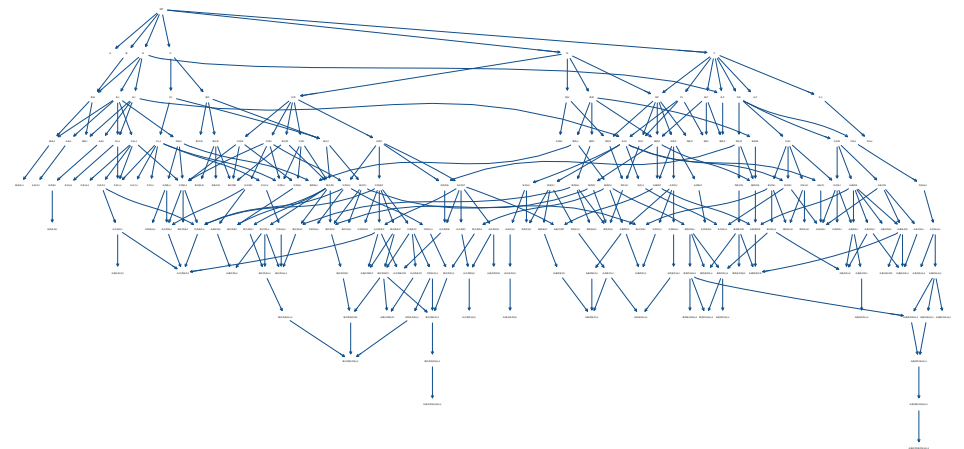

ID 3ageR5IDF1410rU5i  
 acc genotypes 51  
 peaks no back 25  
 removed edges NA  
 prop rem edges NA

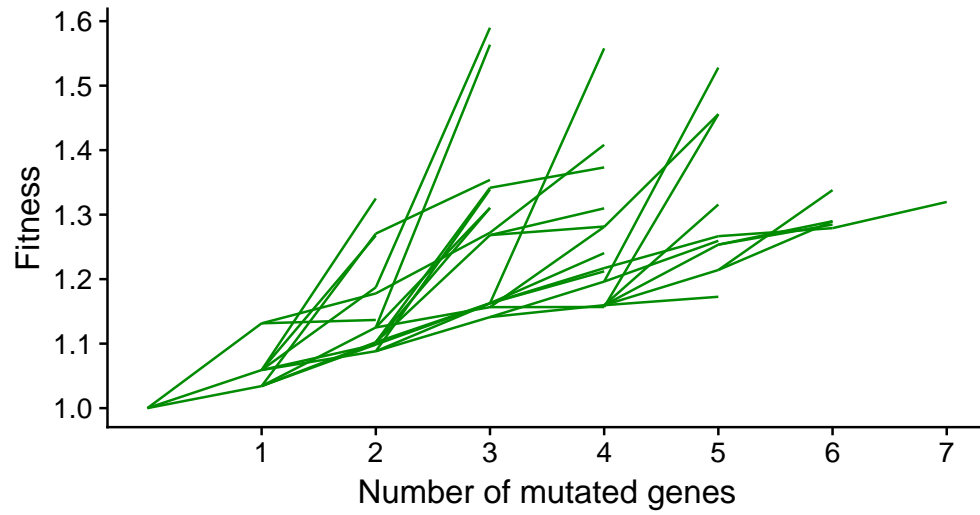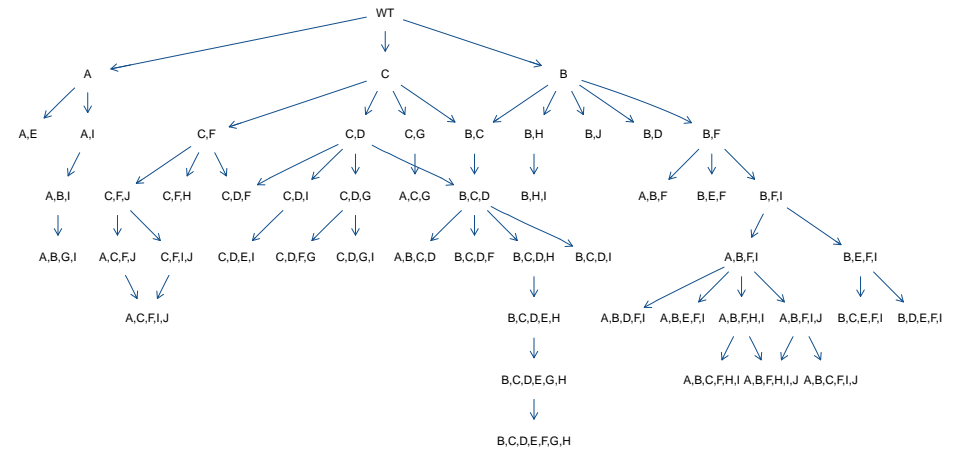

*ID* 3PJ410K7y10k7imair  
*acc genotypes* 921  
*peaks no back* 50  
*removed edges* NA  
*prop rem edges* NA

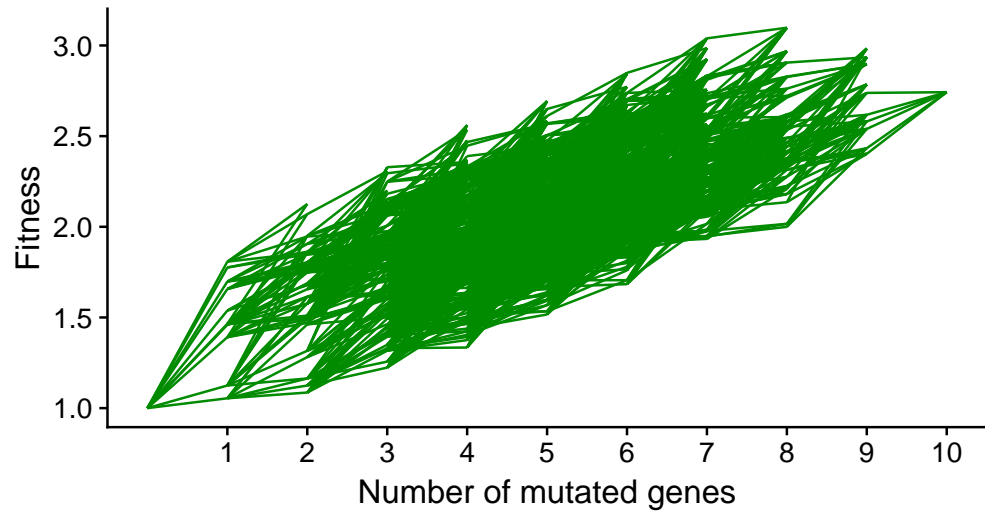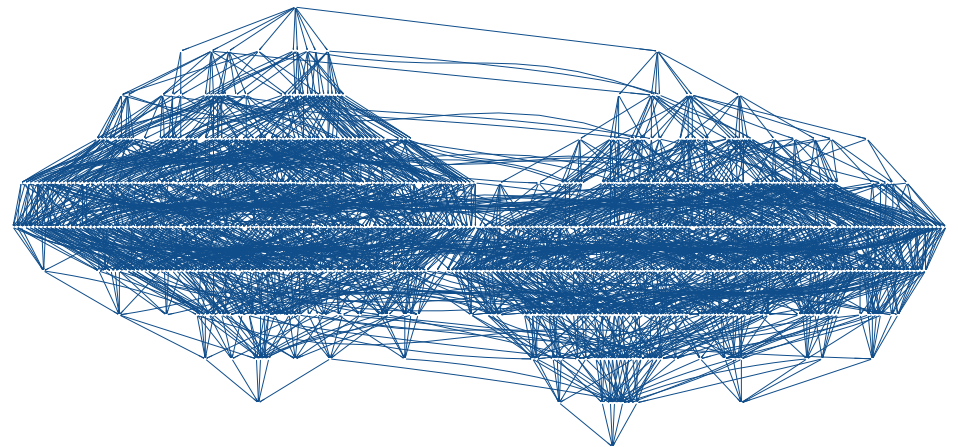

ID 3r101LFQ84LQ4QX2E  
 acc genotypes 66  
 peaks no back 29  
 removed edges NA  
 prop rem edges NA

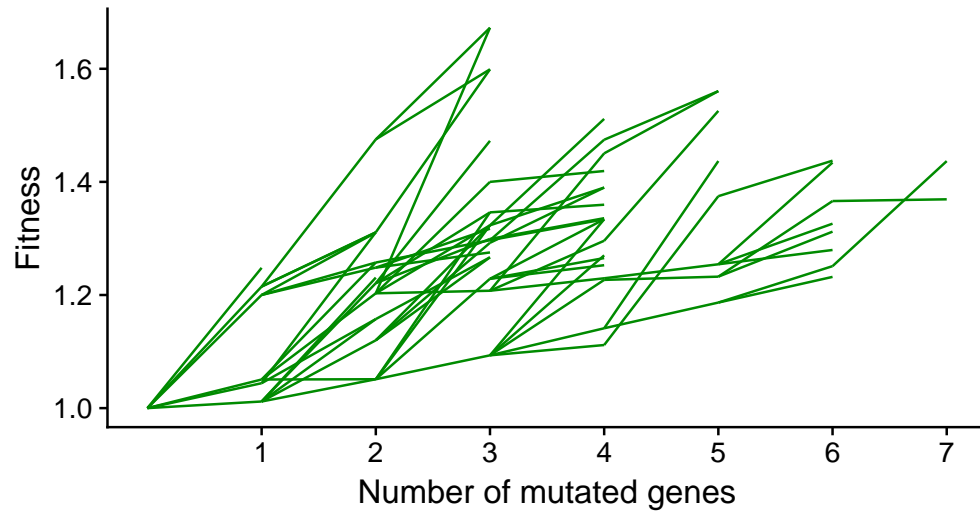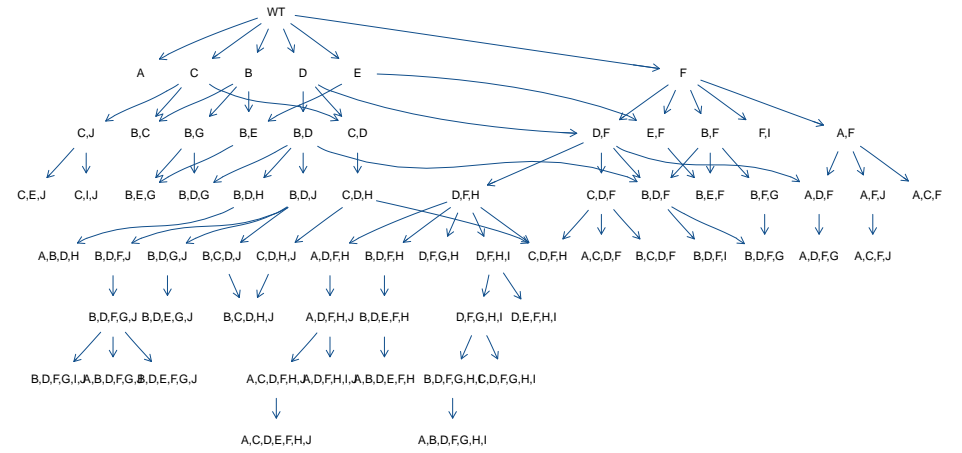

ID 3uTPGDsbMFbp45JR  
 acc genotypes 131  
 peaks no back 38  
 removed edges NA  
 prop rem edges NA

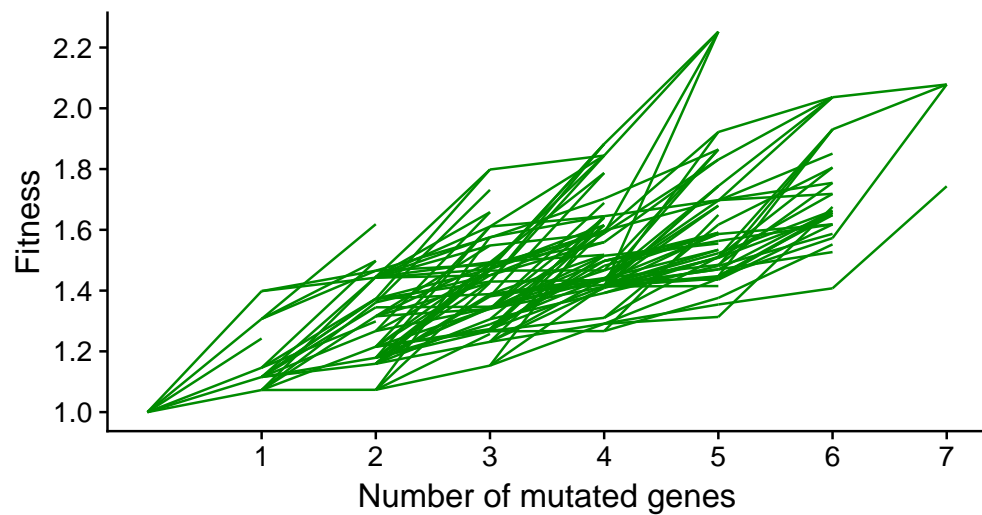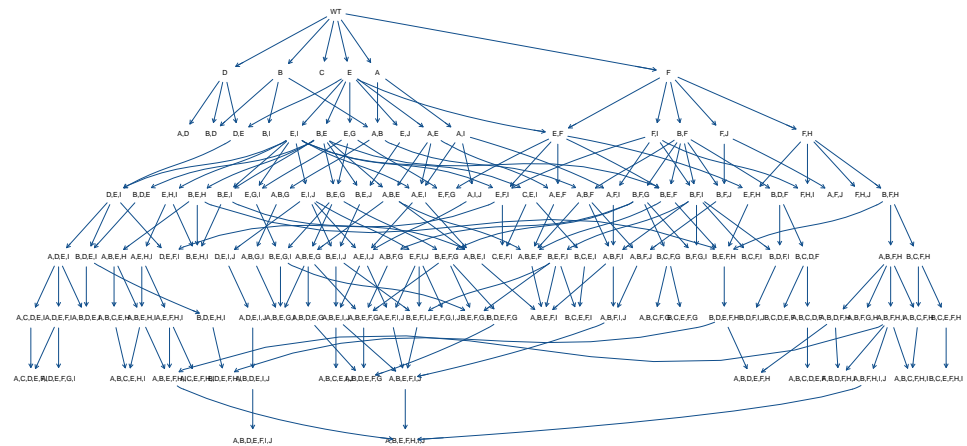

ID 3VdNxc10SG10x5vQBJ  
 acc genotypes 82  
 peaks no back 35  
 removed edges NA  
 prop rem edges NA

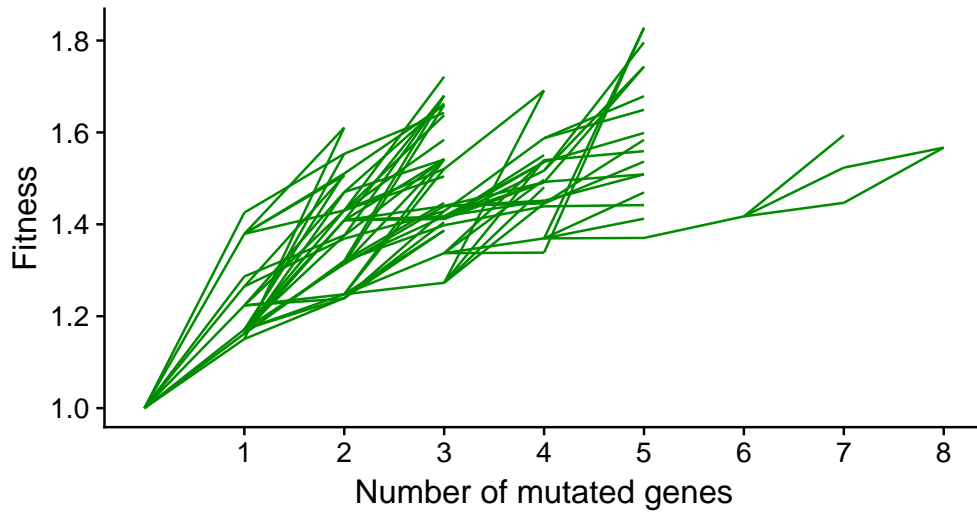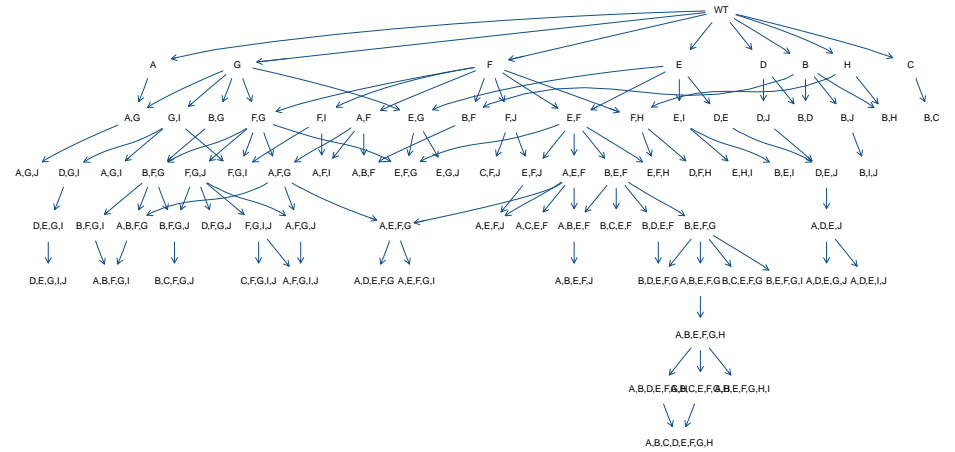

ID 4Cky1UeVikV4sax  
acc genotypes 191  
peaks no back 38  
removed edges NA  
prop rem edges NA

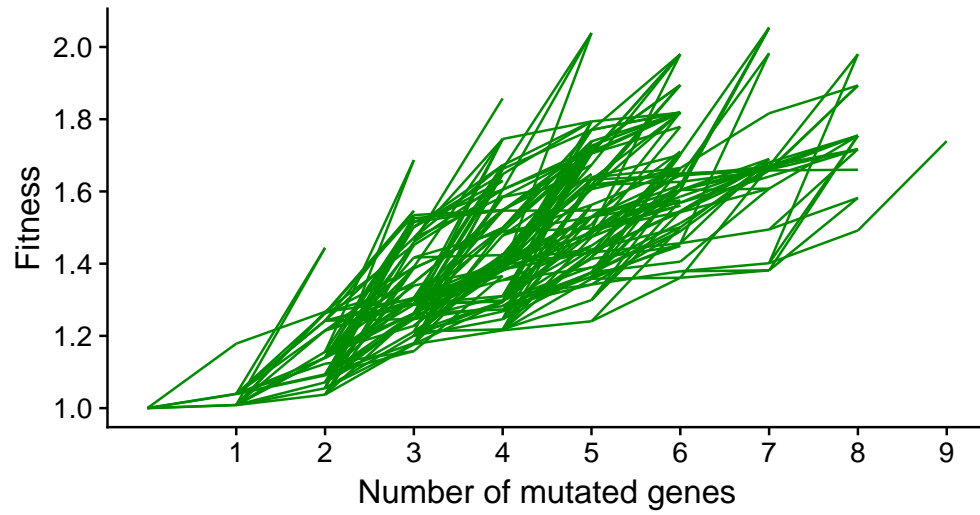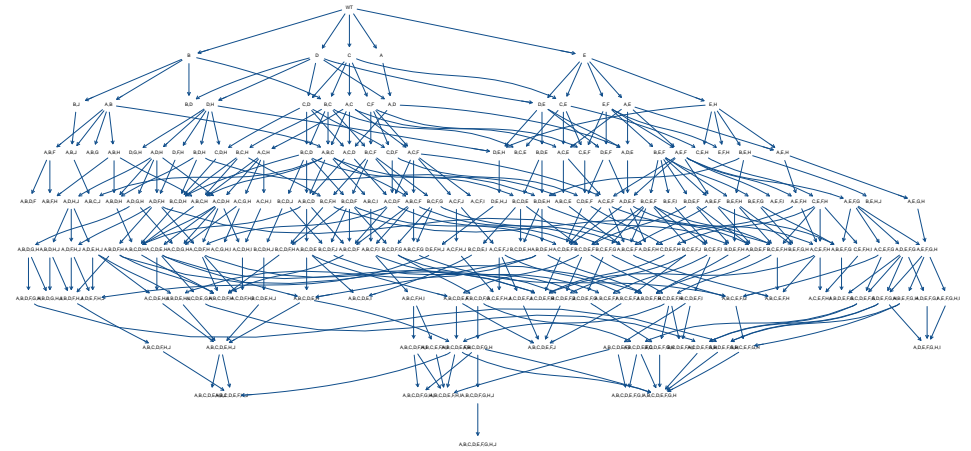



ID 4RVESRiVwzxmDTB9  
 acc genotypes 82  
 peaks no back 23  
 removed edges NA  
 prop rem edges NA

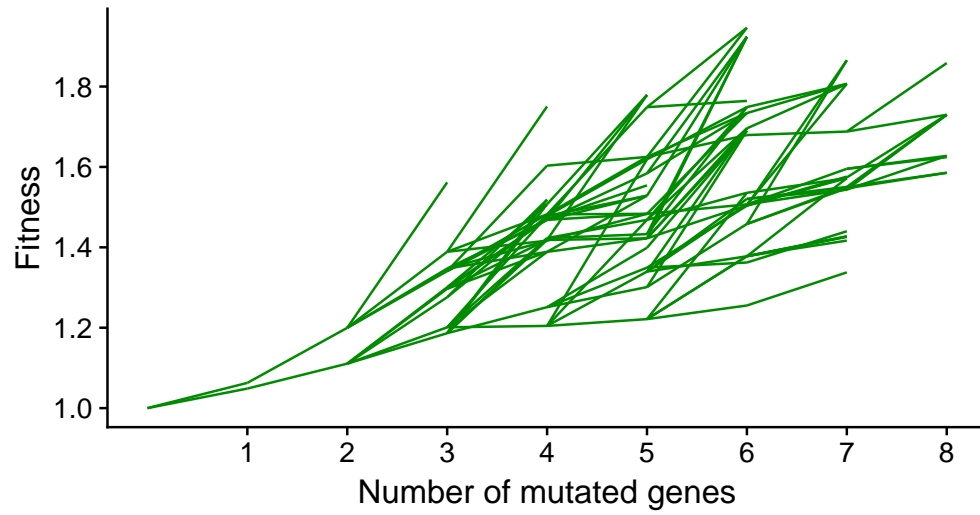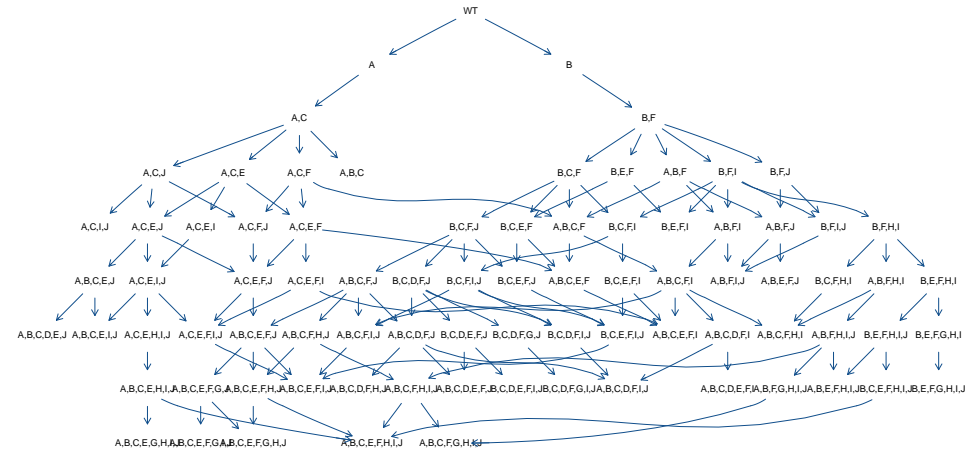

ID 5h10KTbvYD9O10OXnK  
 acc genotypes 59  
 peaks no back 28  
 removed edges NA  
 prop rem edges NA

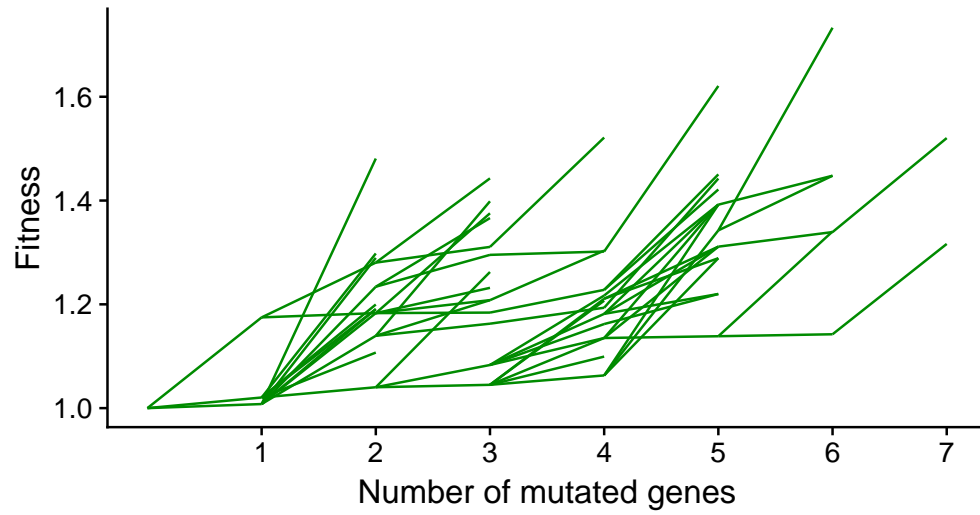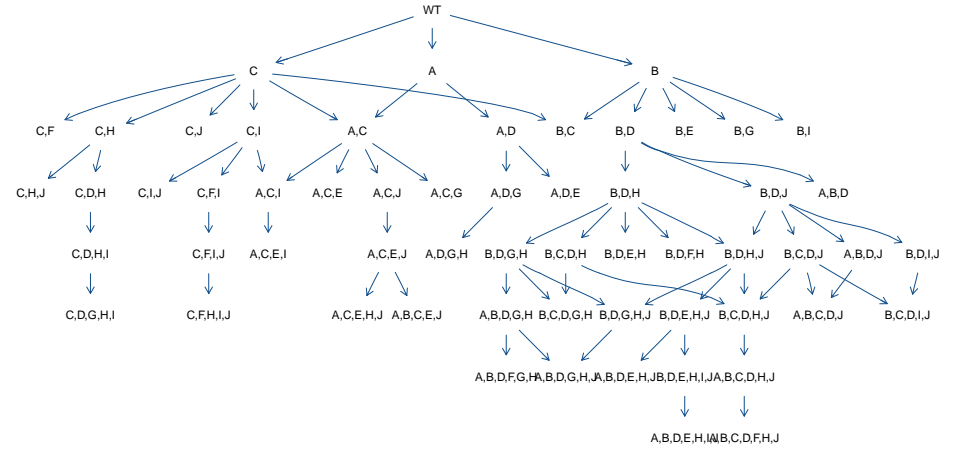

ID 5w3nMqdUbSKjUyuj  
acc genotypes 336  
peaks no back 69  
removed edges NA  
prop rem edges NA

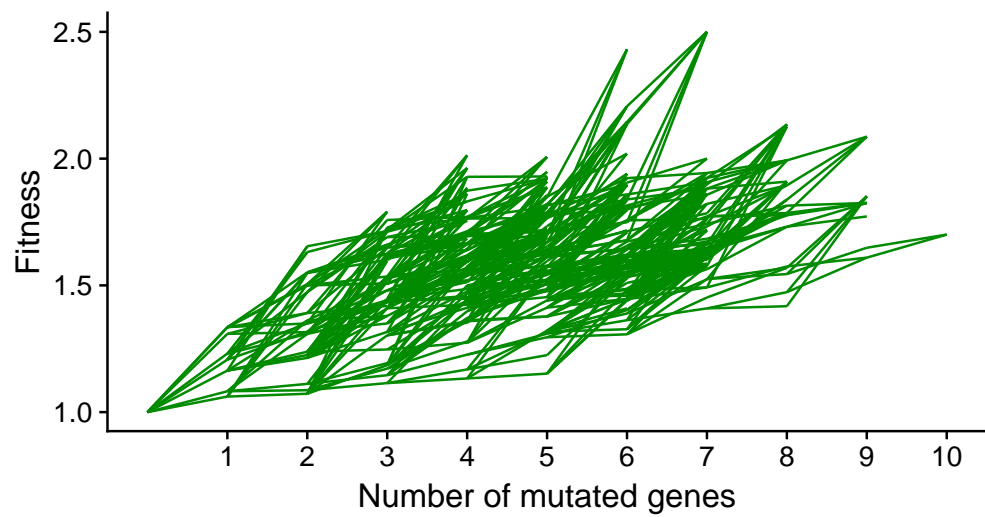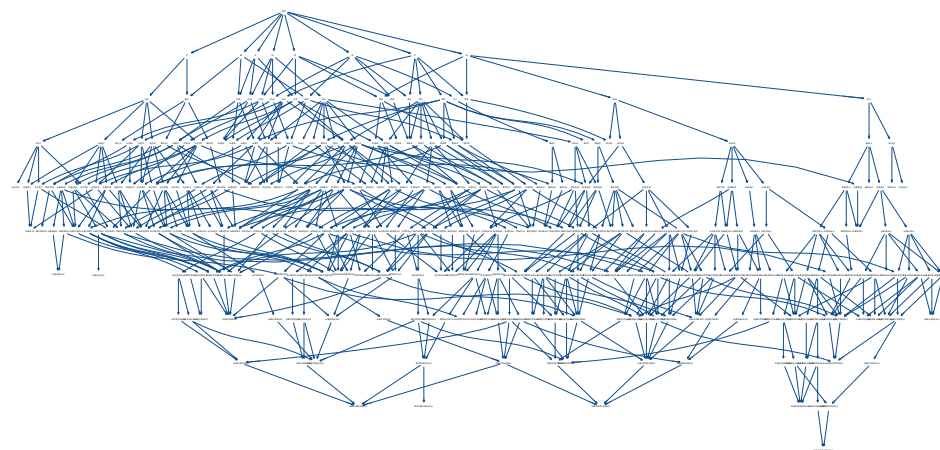

ID 5XTuzOyhioi24t2s  
 acc genotypes 48  
 peaks no back 21  
 removed edges NA  
 prop rem edges NA

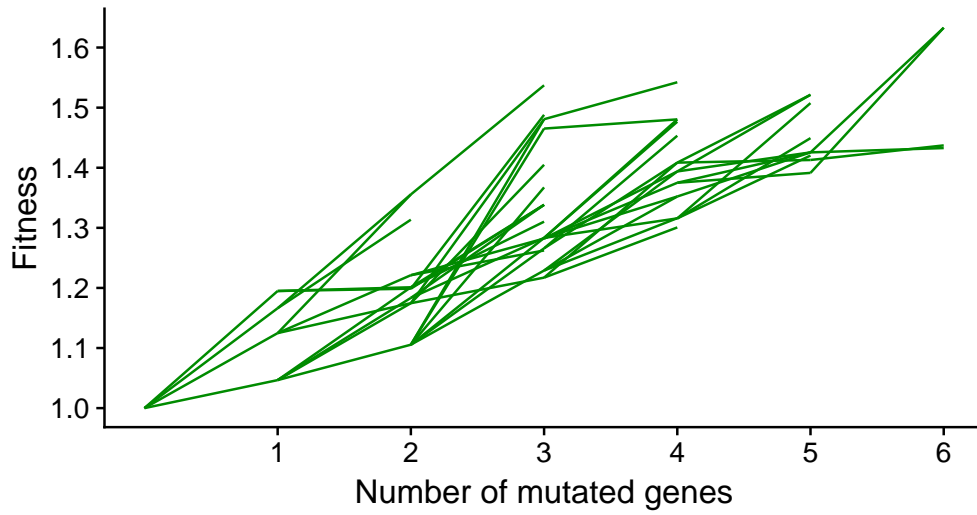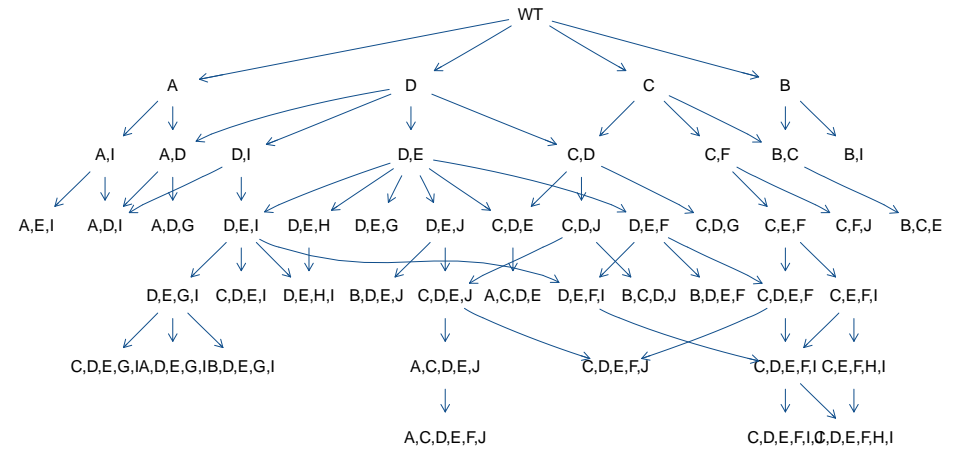

ID 75tsJre1YoxpOsyh  
 acc genotypes 187  
 peaks no back 70  
 removed edges NA  
 prop rem edges NA

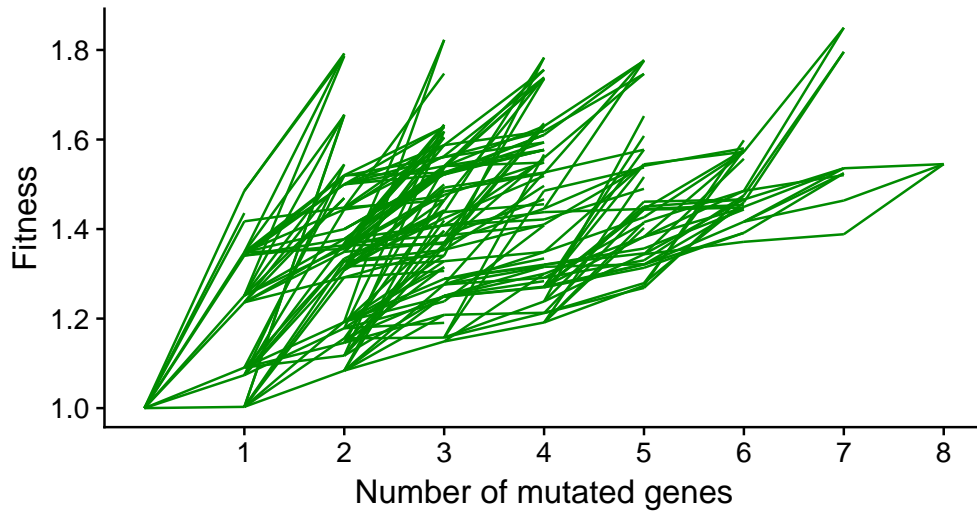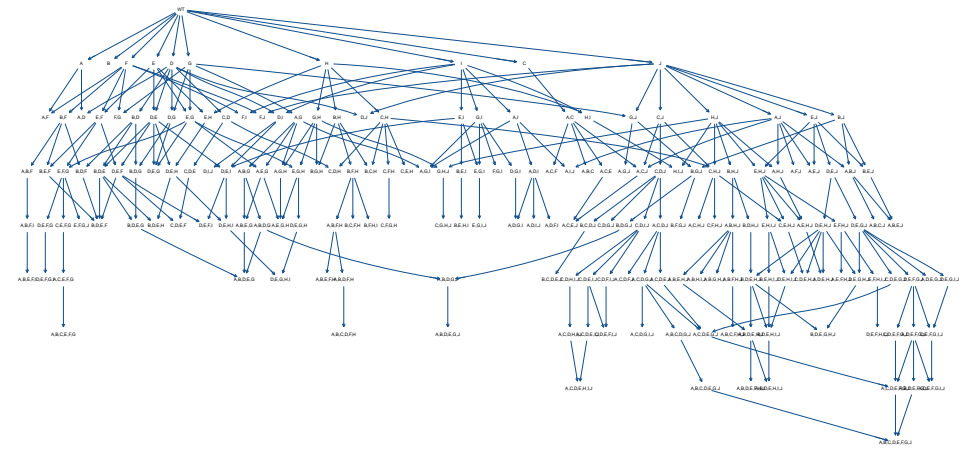

*ID* 7DaZyu10znssTnBfx  
*acc genotypes* 674  
*peaks no back* 56  
*removed edges* NA  
*prop rem edges* NA

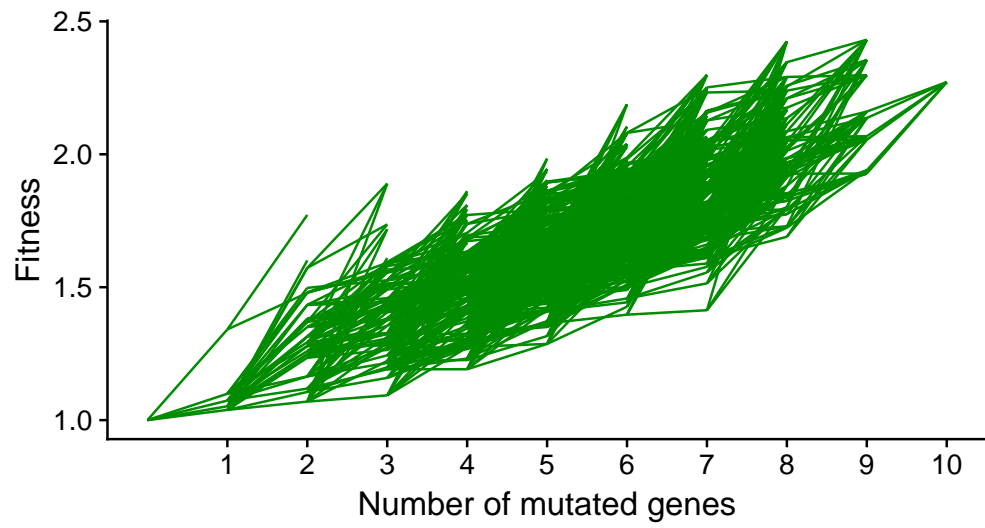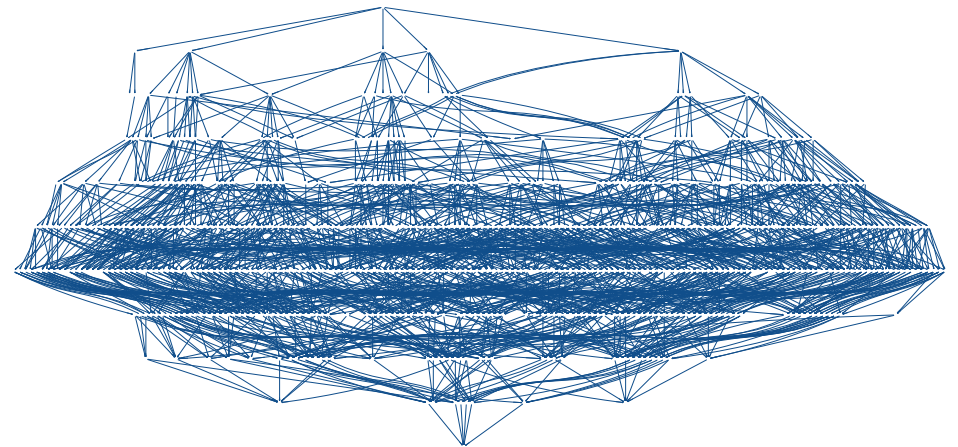

*ID* 7GapUNhPAnaZAI1M  
*acc genotypes* 427  
*peaks no back* 53  
*removed edges* NA  
*prop rem edges* NA

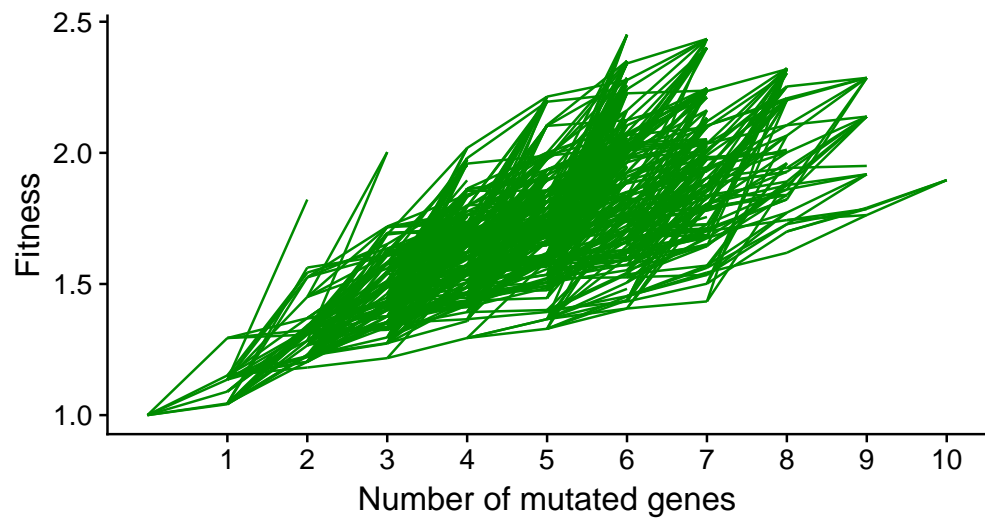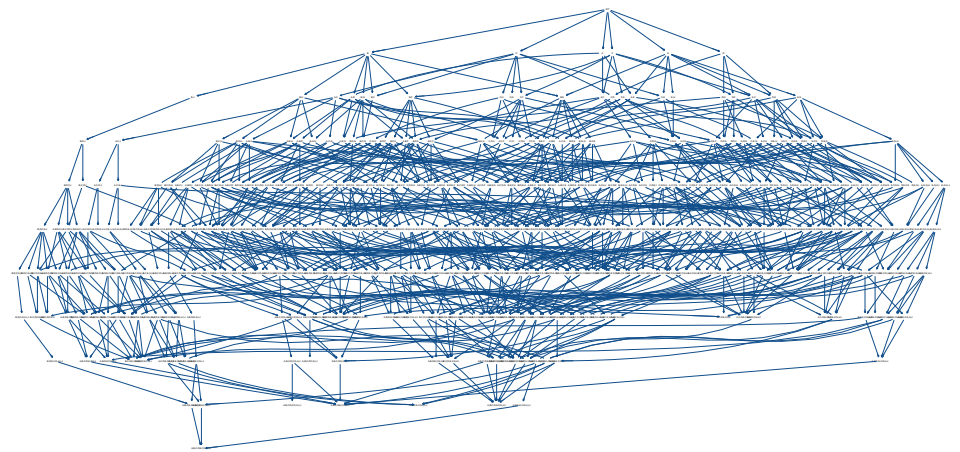

ID 7jxvBRiz6DAUzbL  
 acc genotypes 24  
 peaks no back 12  
 removed edges NA  
 prop rem edges NA

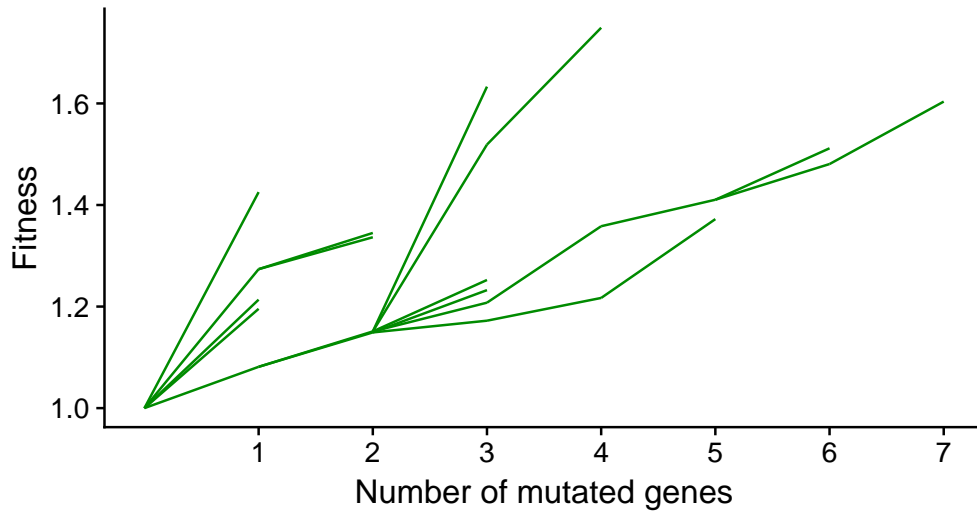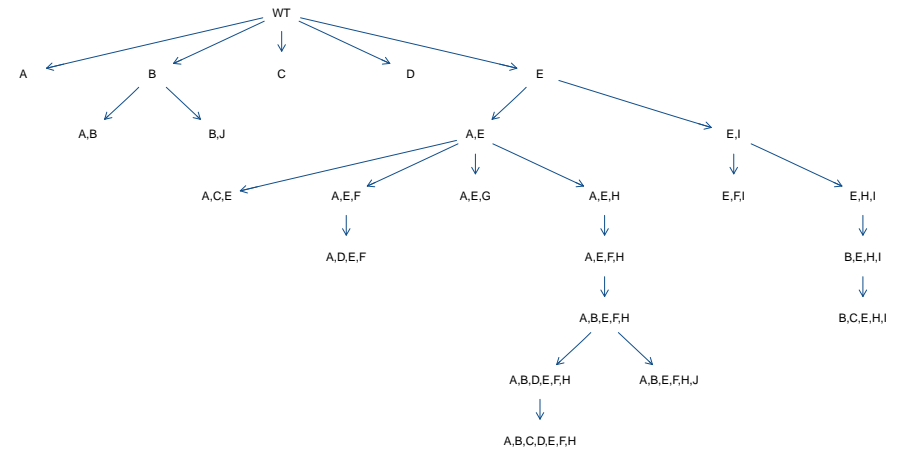



*ID* 7KQQodSTMHz6tzpM  
*acc genotypes* 291  
*peaks no back* 55  
*removed edges* NA  
*prop rem edges* NA

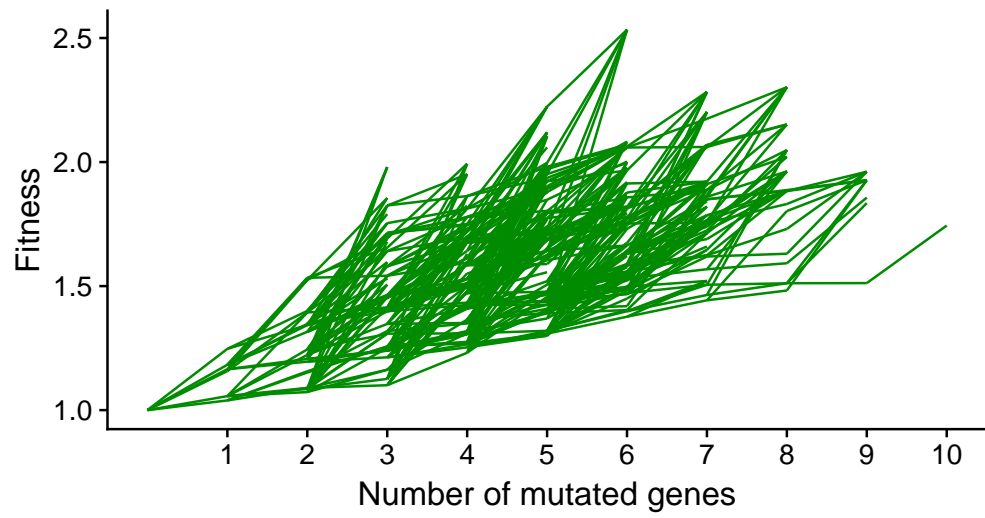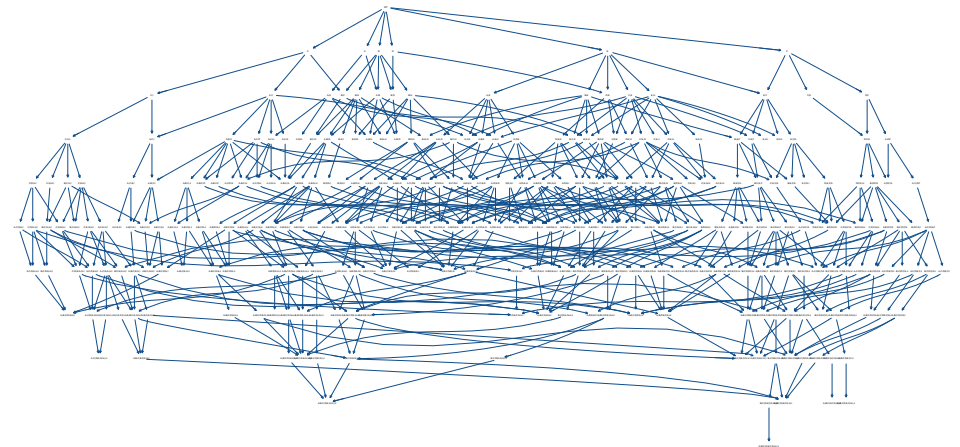

ID 7yMvs88xHRDYKybO  
 acc genotypes 182  
 peaks no back 62  
 removed edges NA  
 prop rem edges NA

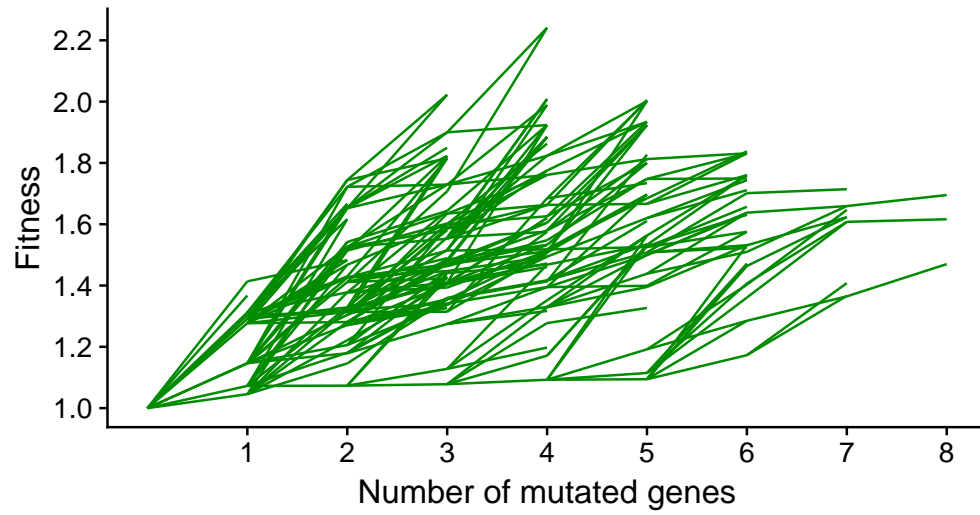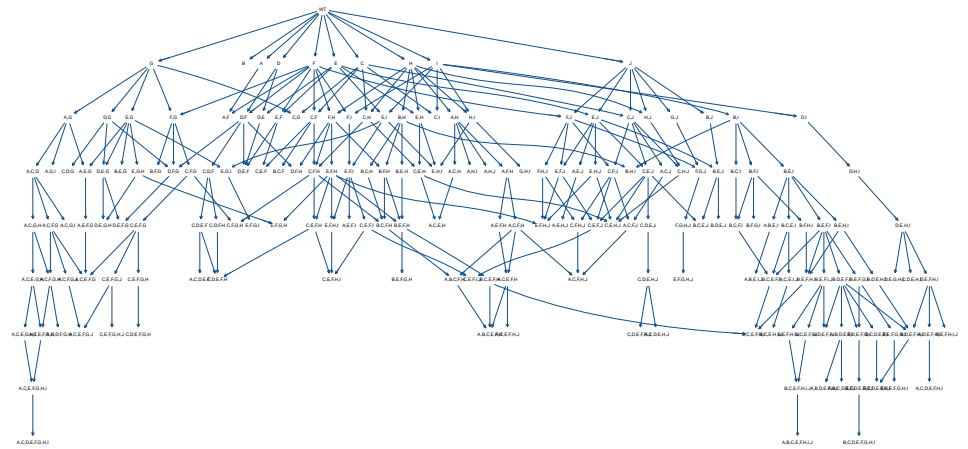

ID 7YYdBu6jr3vr7yKp  
acc genotypes 197  
peaks no back 75  
removed edges NA  
prop rem edges NA

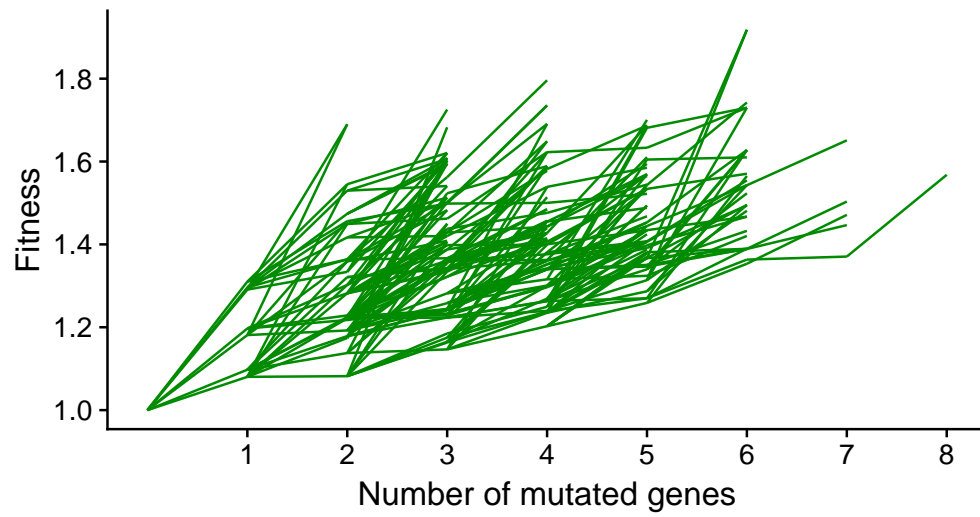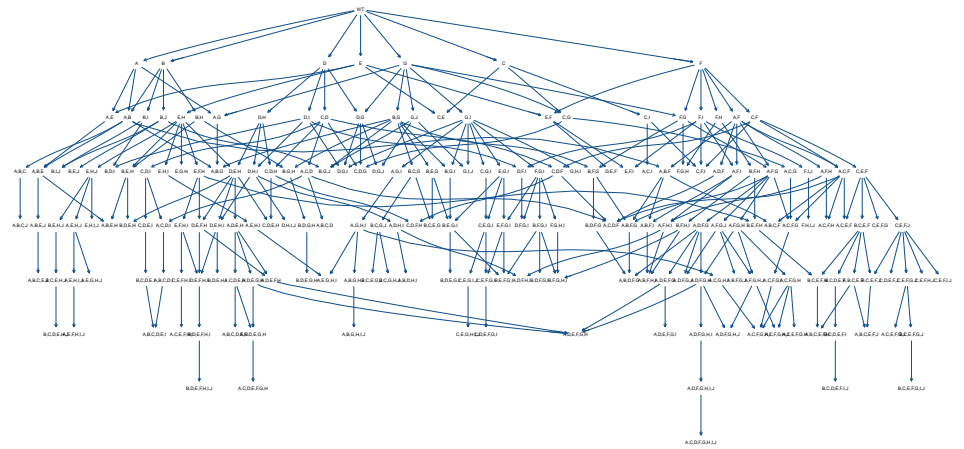

ID 80iLR0dLmPboaFyZ  
 acc genotypes 145  
 peaks no back 62  
 removed edges NA  
 prop rem edges NA

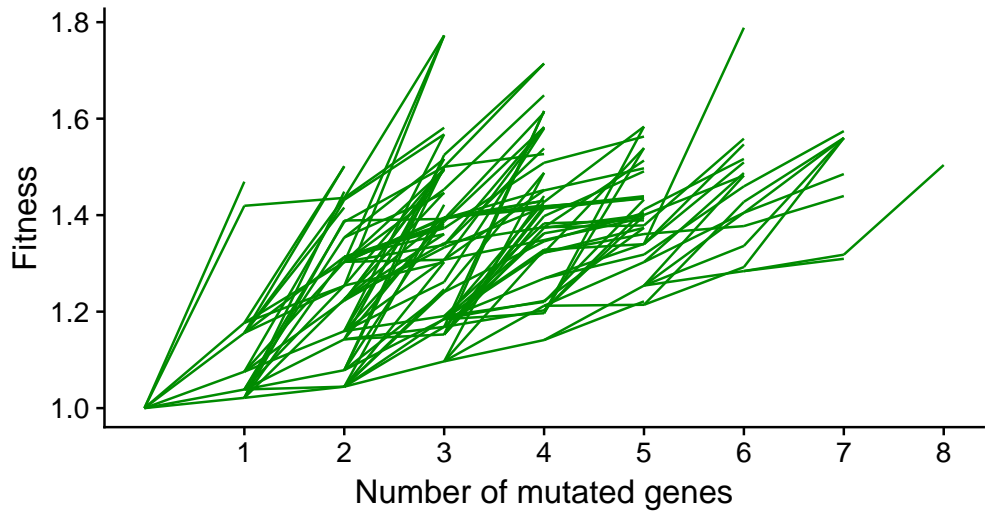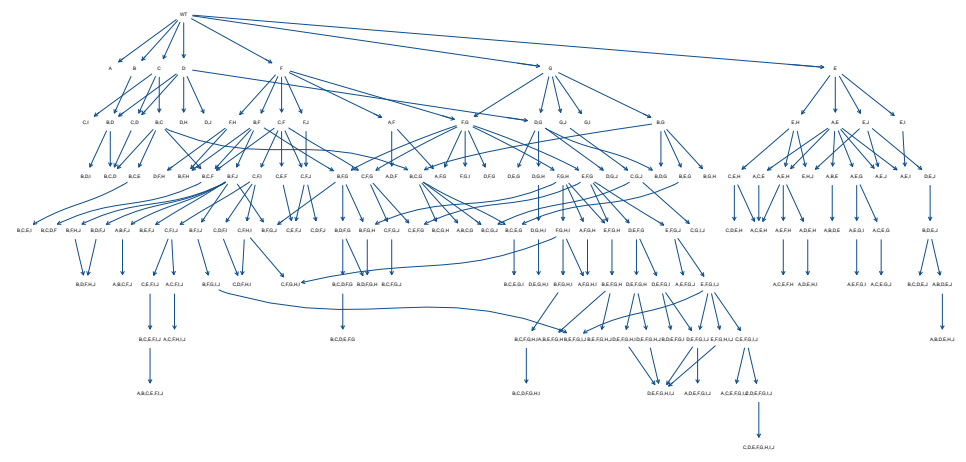

ID 8RlqFjyqv5Fe2F7q  
acc genotypes 130  
peaks no back 41  
removed edges NA  
prop rem edges NA

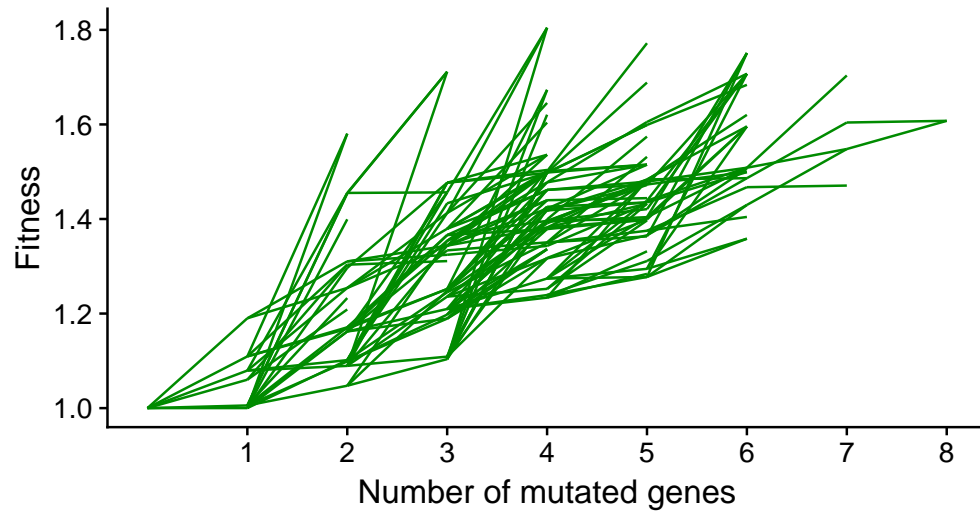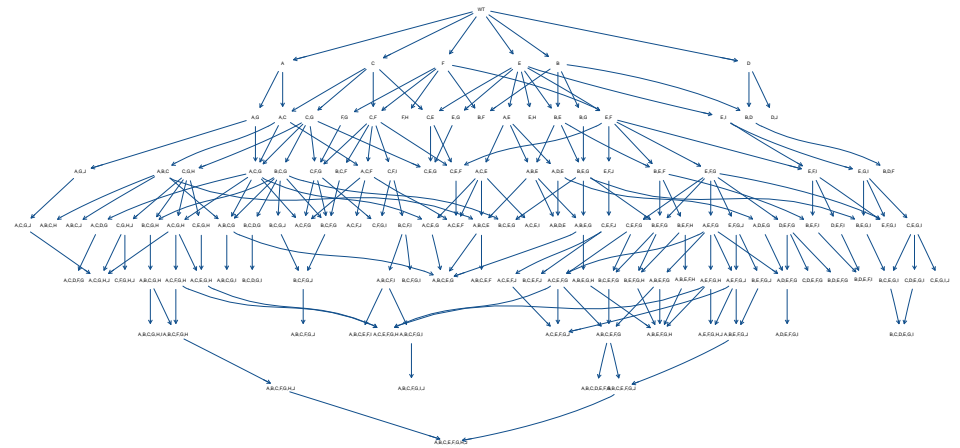

ID 8Wuudsphcy5tFFeb  
 acc genotypes 117  
 peaks no back 46  
 removed edges NA  
 prop rem edges NA

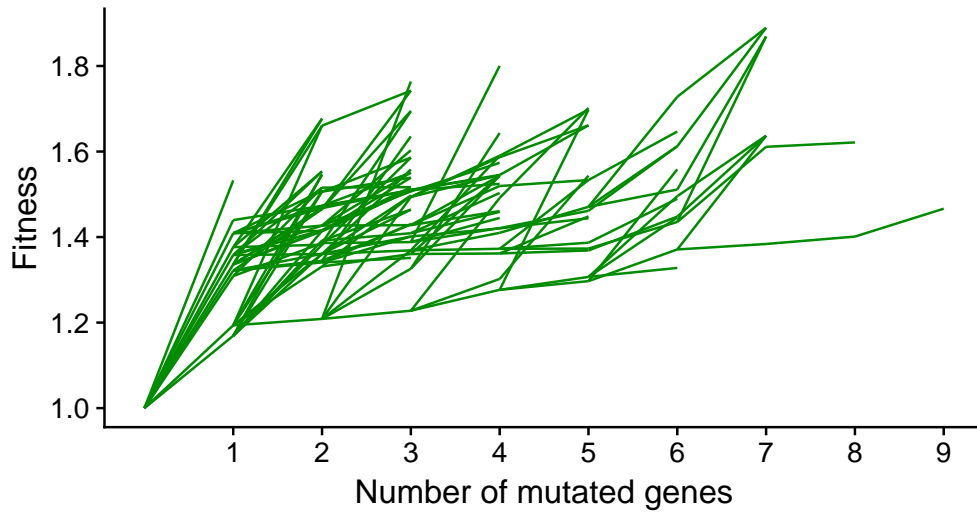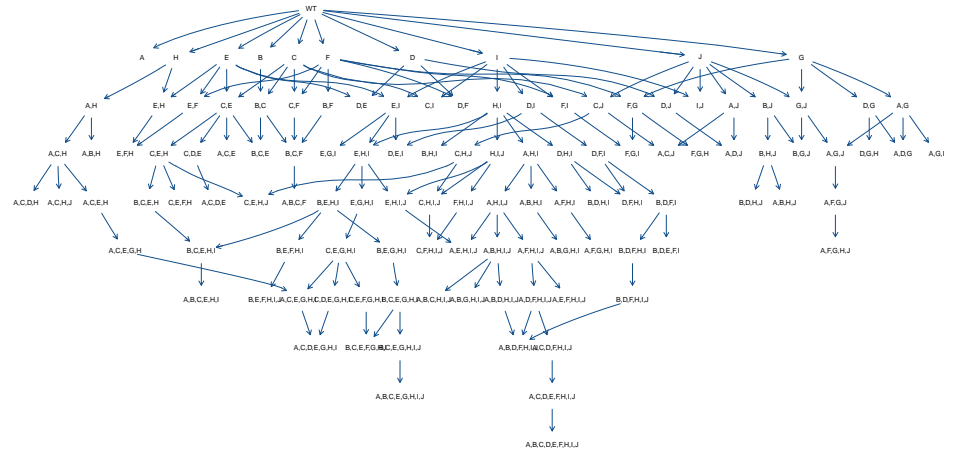

ID 913oZpLmQJl3z3r  
 acc genotypes 96  
 peaks no back 39  
 removed edges NA  
 prop rem edges NA

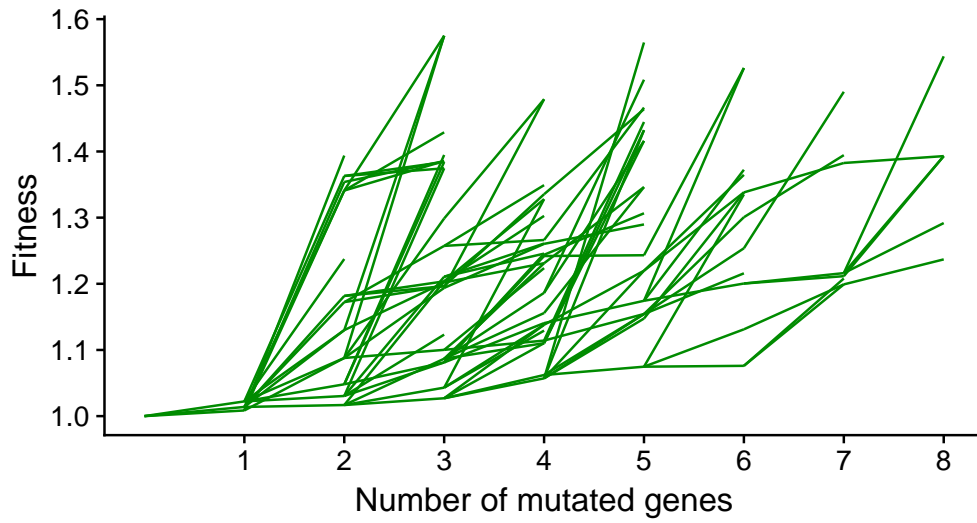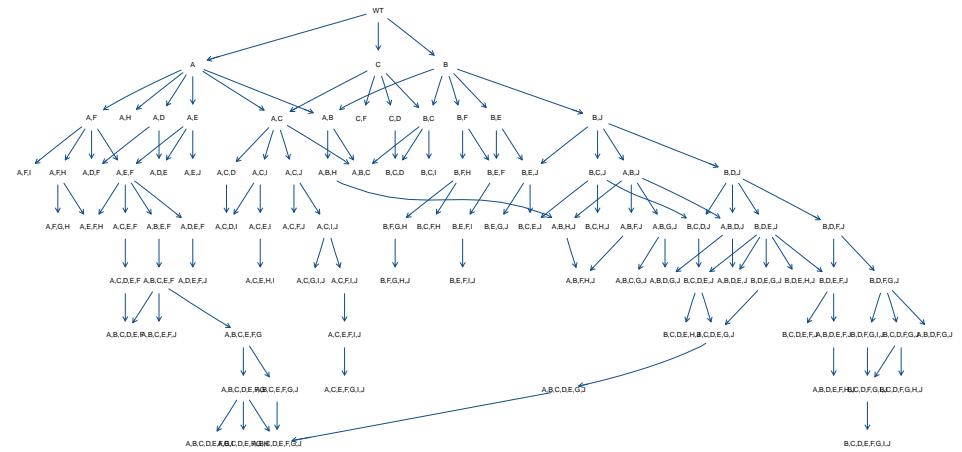

ID 9cep5DgsrTOPpWos  
acc genotypes 163  
peaks no back 43  
removed edges NA  
prop rem edges NA

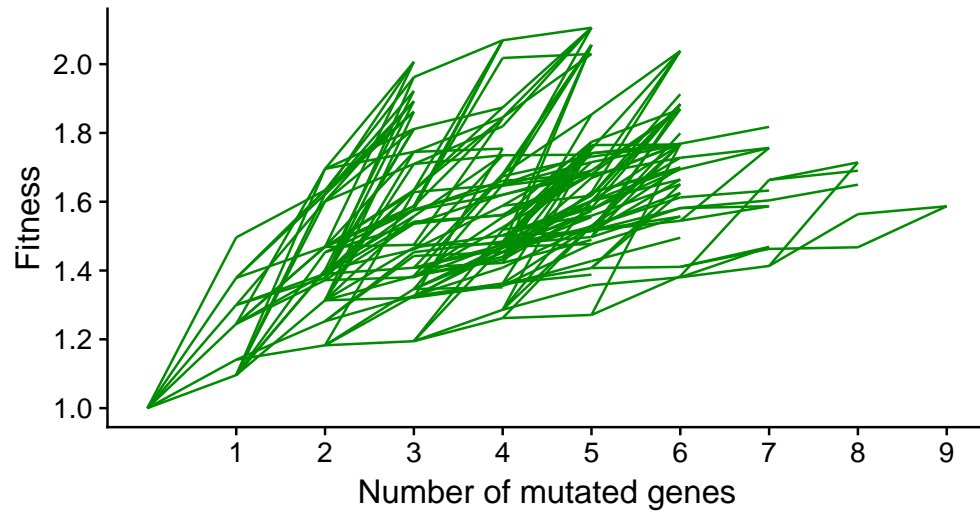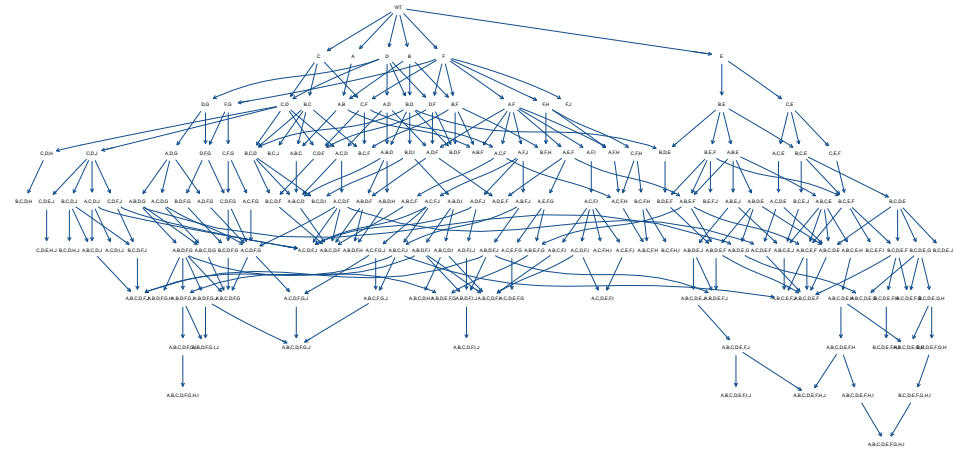



*ID* 9FoiB310FGDvgWcIE  
*acc genotypes* 231  
*peaks no back* 69  
*removed edges* NA  
*prop rem edges* NA

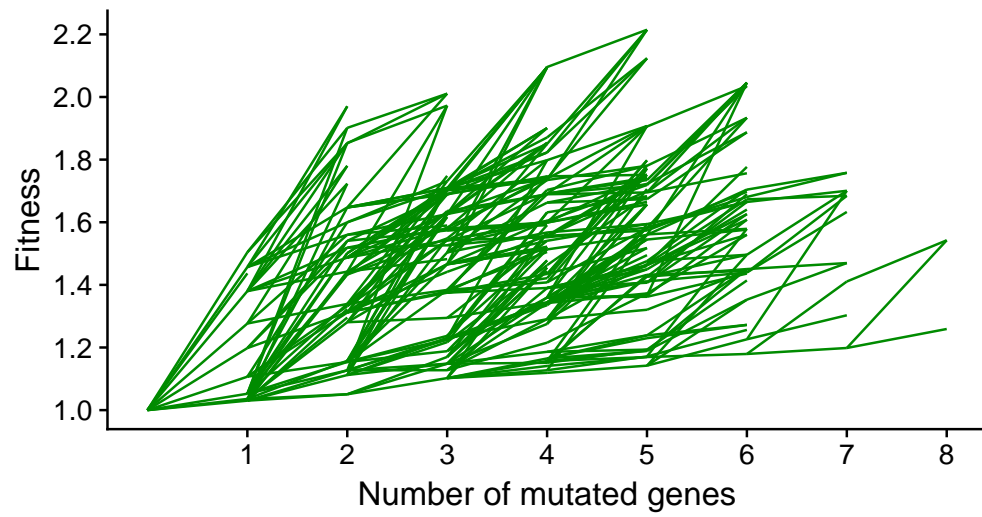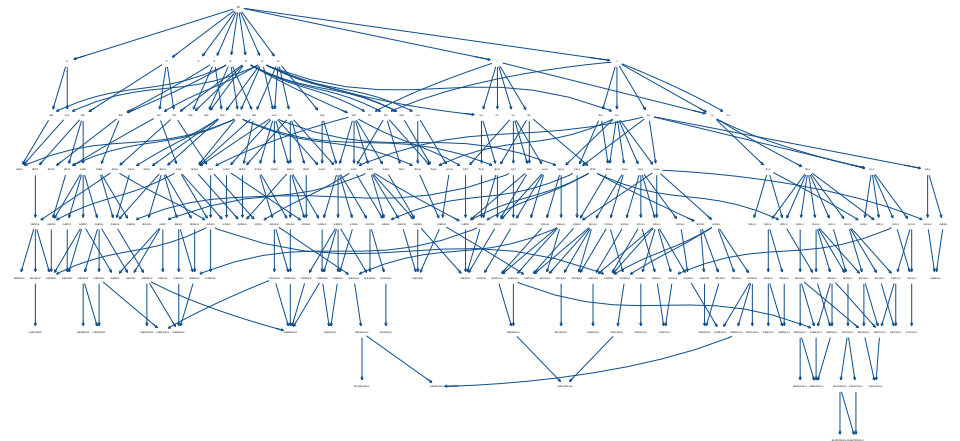

*ID* A1JsKu9z21G7TWcc  
*acc genotypes* 261  
*peaks no back* 105  
*removed edges* NA  
*prop rem edges* NA

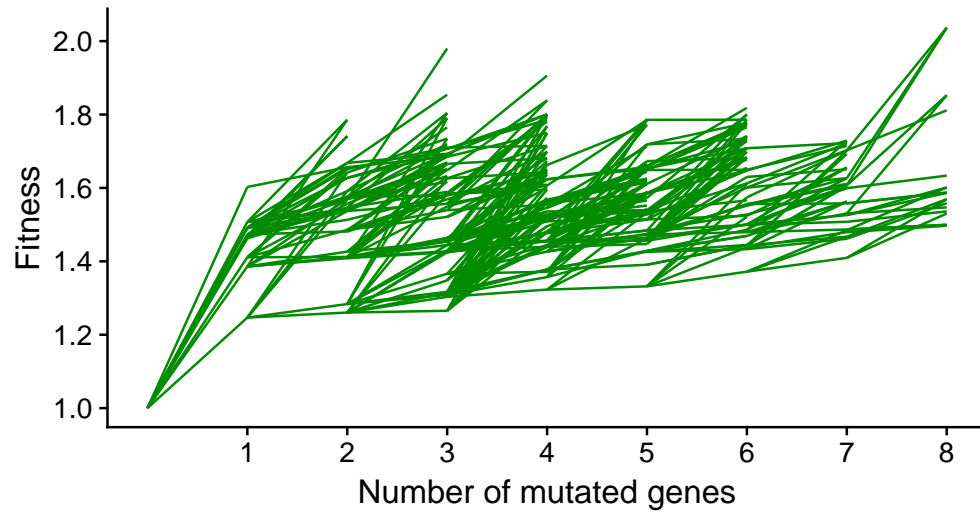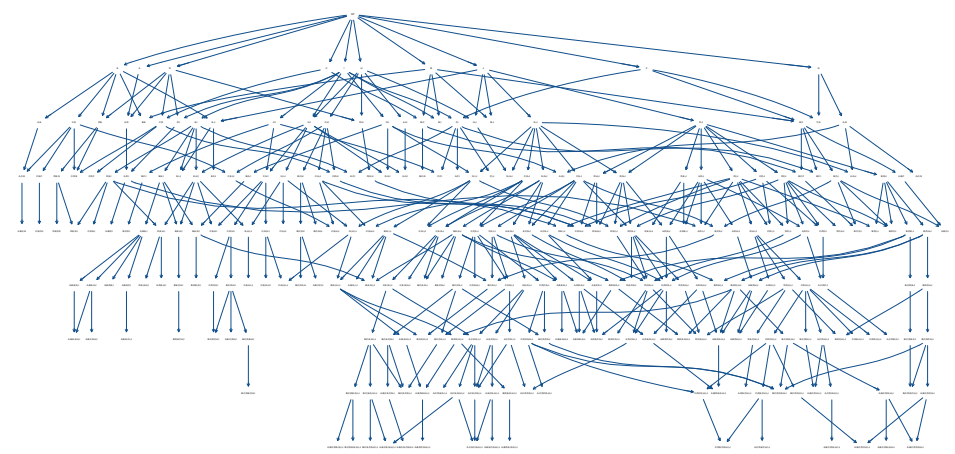

*ID* a3mOmQYxncb9Ad9p  
*acc genotypes* 284  
*peaks no back* 99  
*removed edges* NA  
*prop rem edges* NA

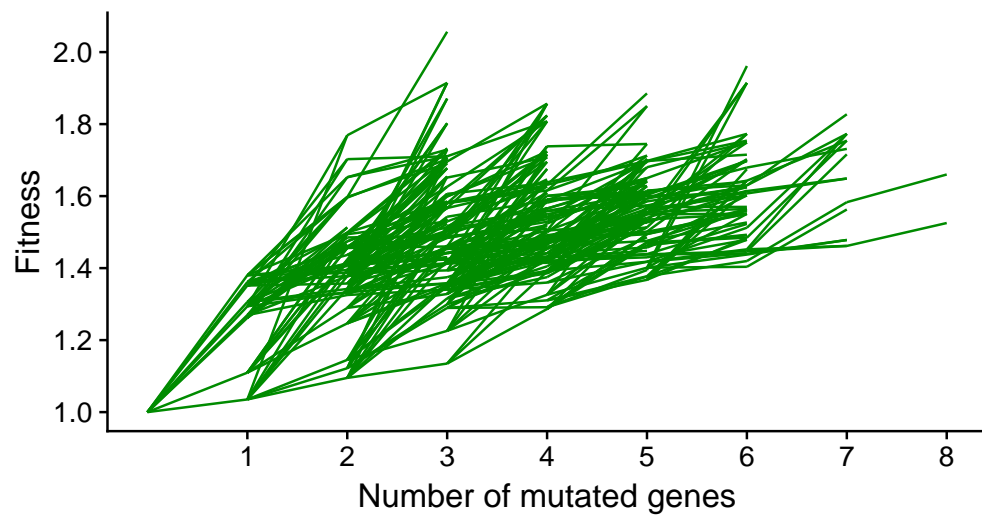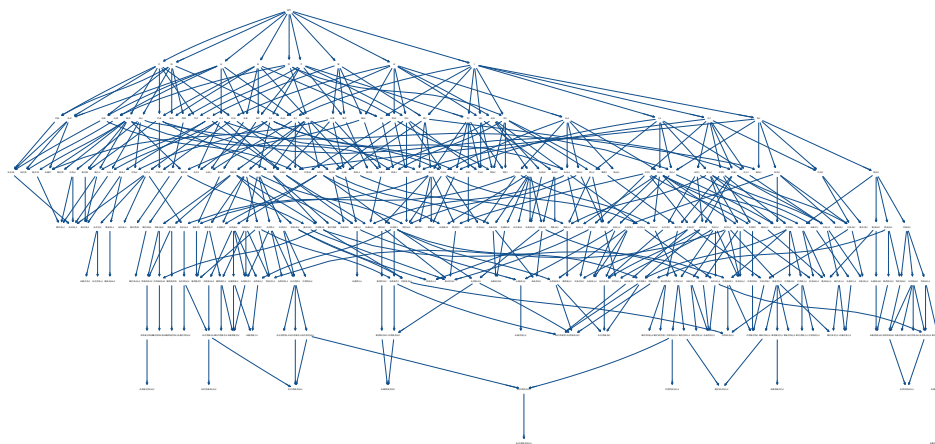

ID AbVs2SaYTXrETNTU  
 acc genotypes 47  
 peaks no back 21  
 removed edges NA  
 prop rem edges NA

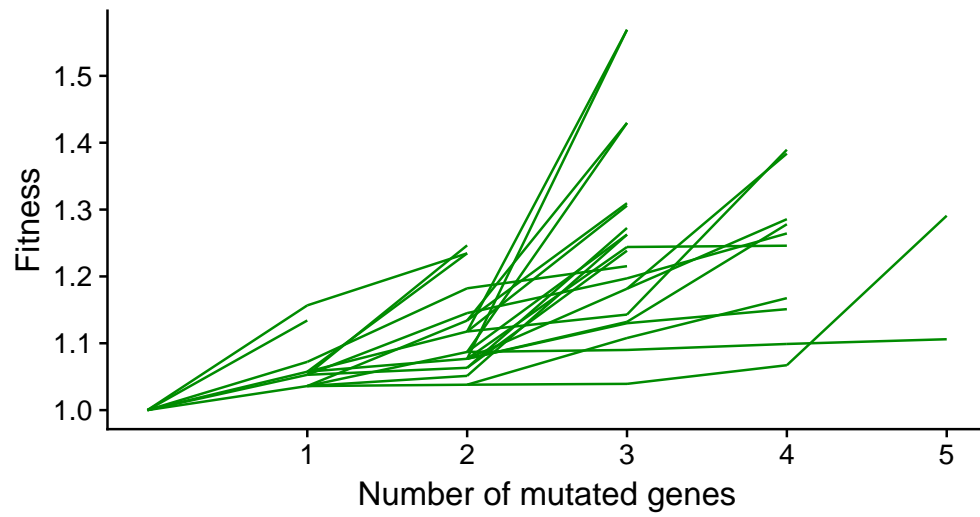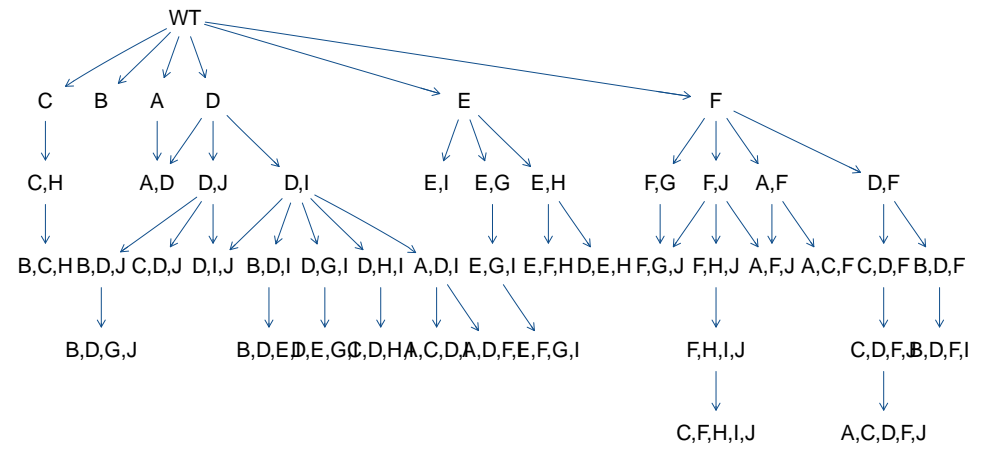

ID aCr6laKy6HuXLp5m  
acc genotypes 180  
peaks no back 53  
removed edges NA  
prop rem edges NA

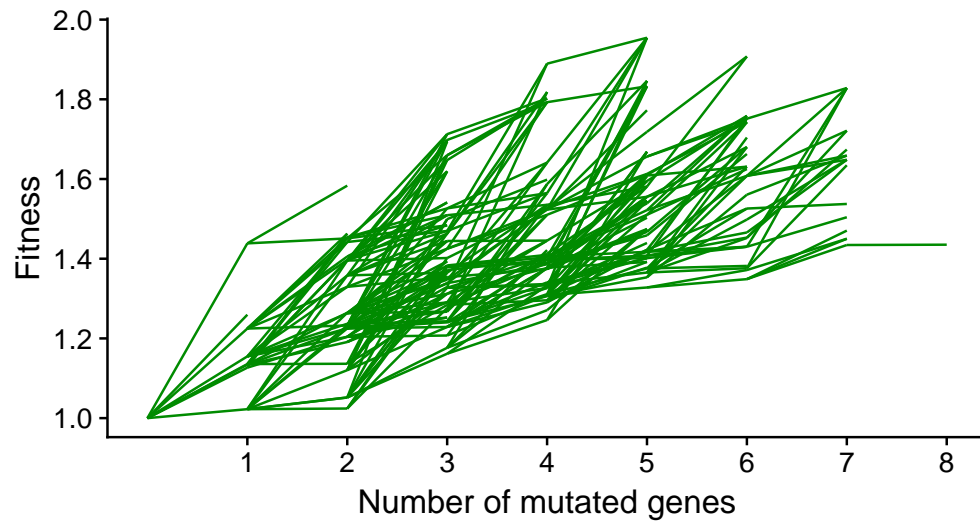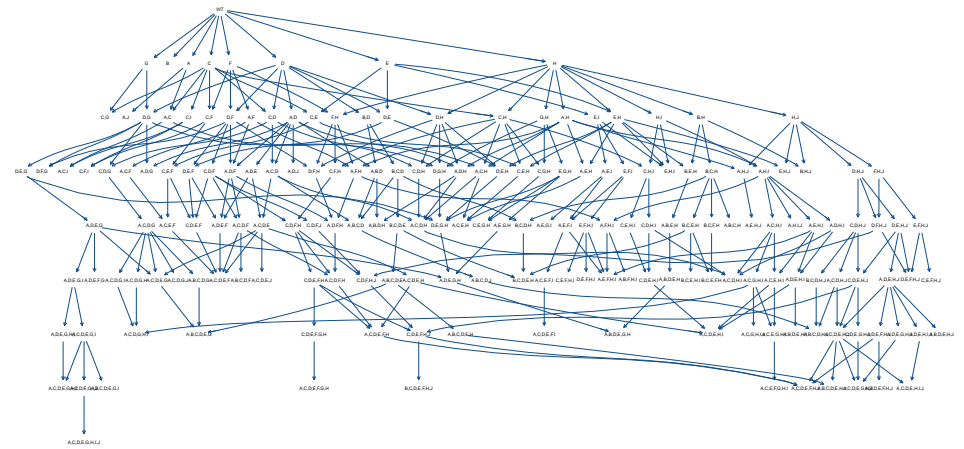

*ID* aEeRemo3Lxmgcy8w  
*acc genotypes* 311  
*peaks no back* 94  
*removed edges* NA  
*prop rem edges* NA

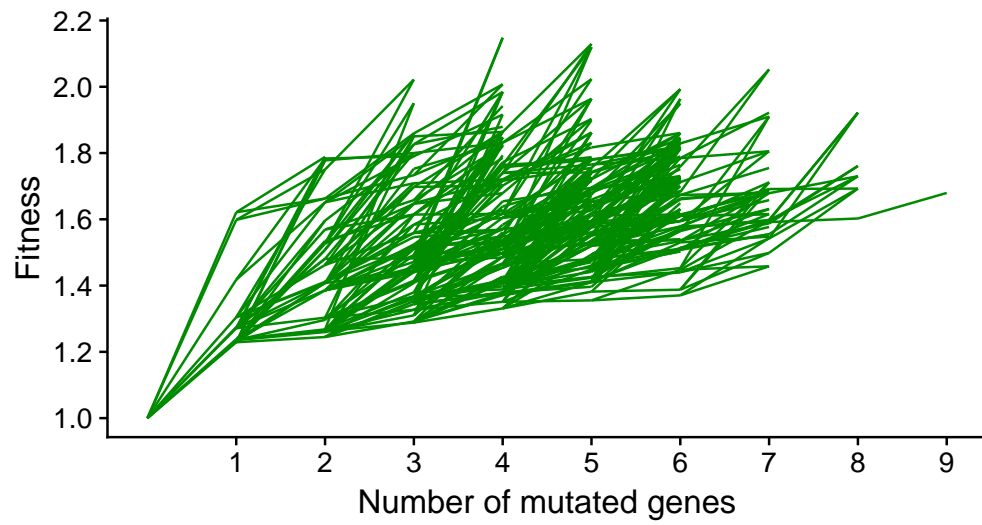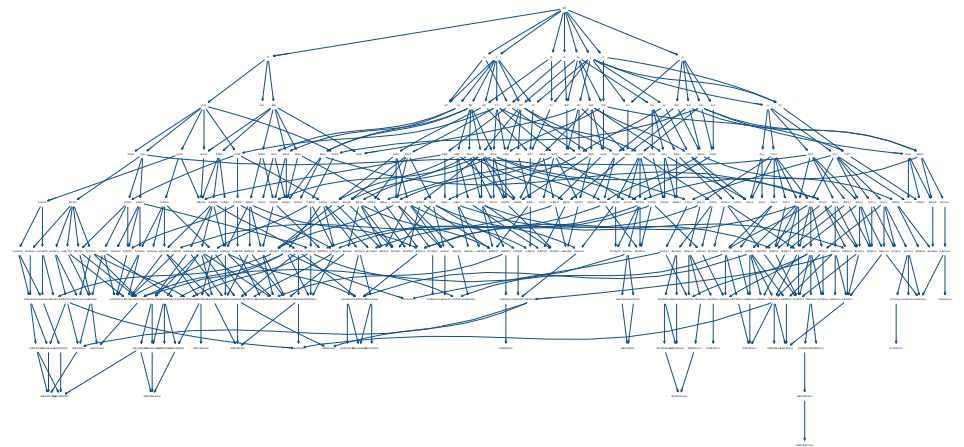

ID Ag710LDVSvAEgCIJ3  
 acc genotypes 50  
 peaks no back 19  
 removed edges NA  
 prop rem edges NA

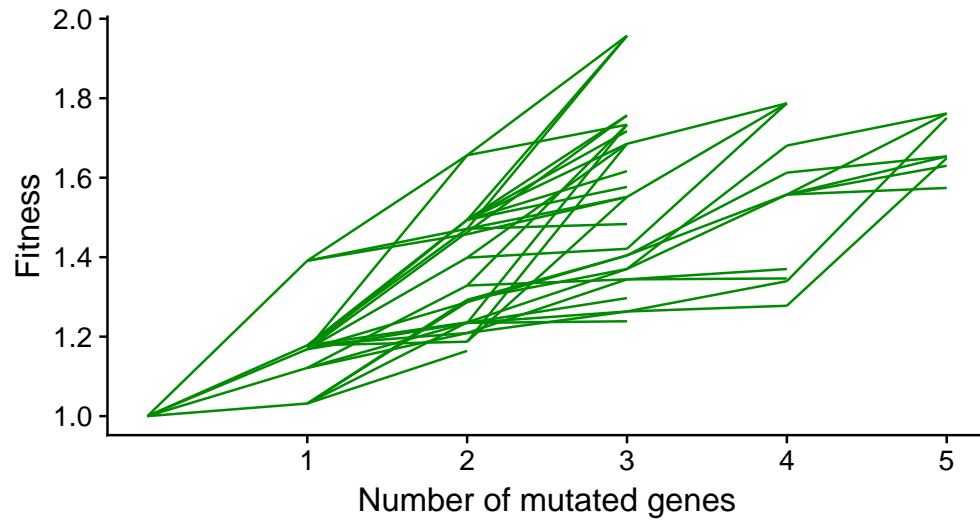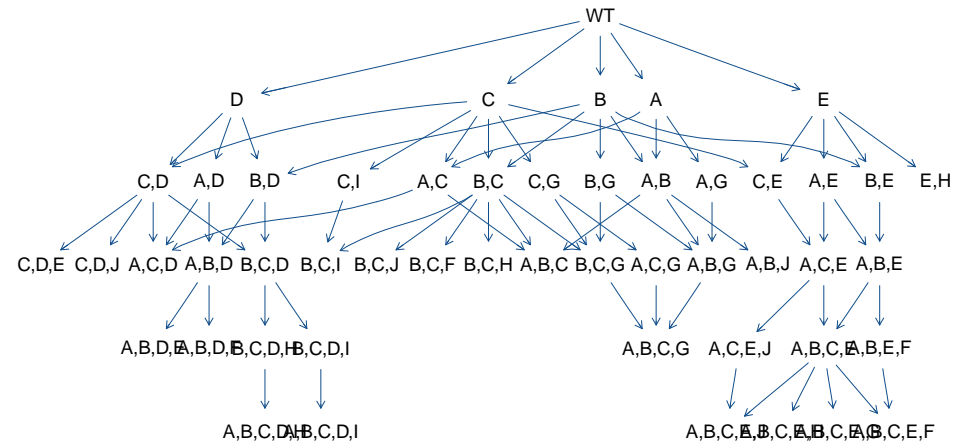

ID ahVo16NivbfzL4Zy  
acc genotypes 442  
peaks no back 56  
removed edges NA  
prop rem edges NA

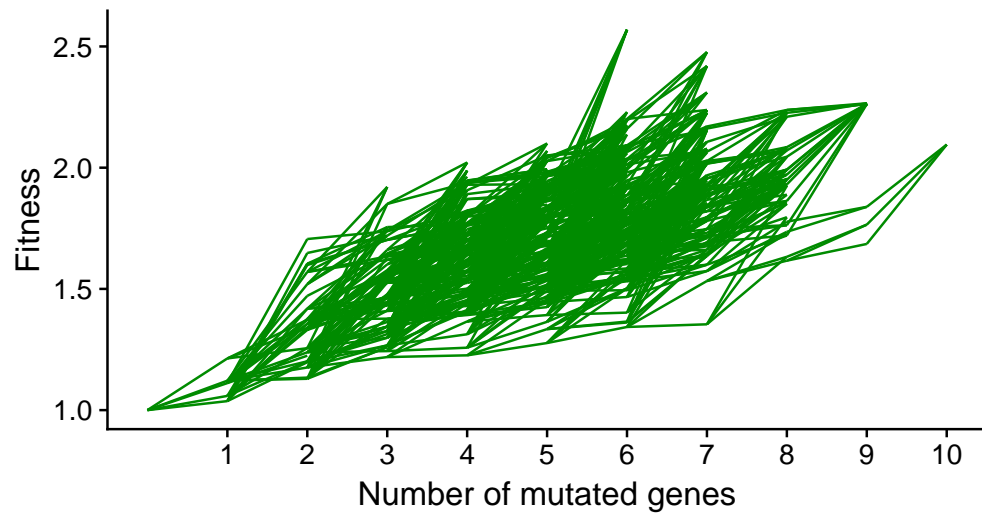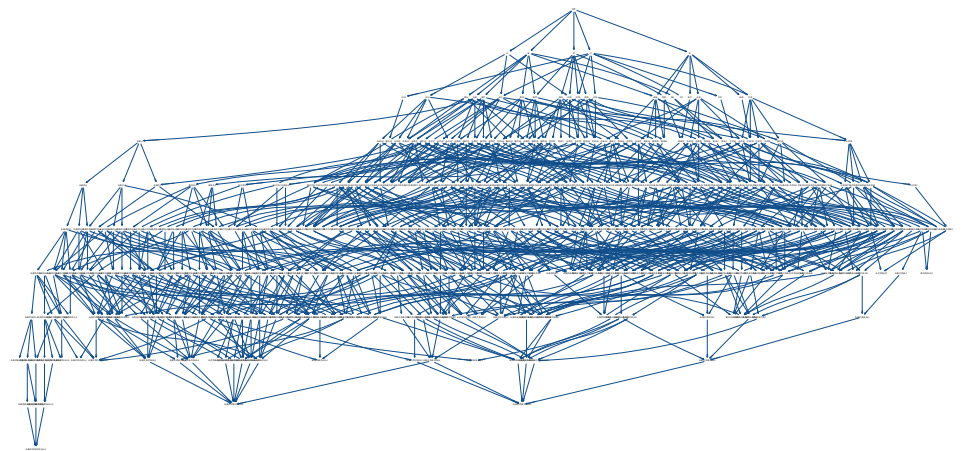



ID AOgjTmG9Hs4vtlBq  
acc genotypes 213  
peaks no back 62  
removed edges NA  
prop rem edges NA

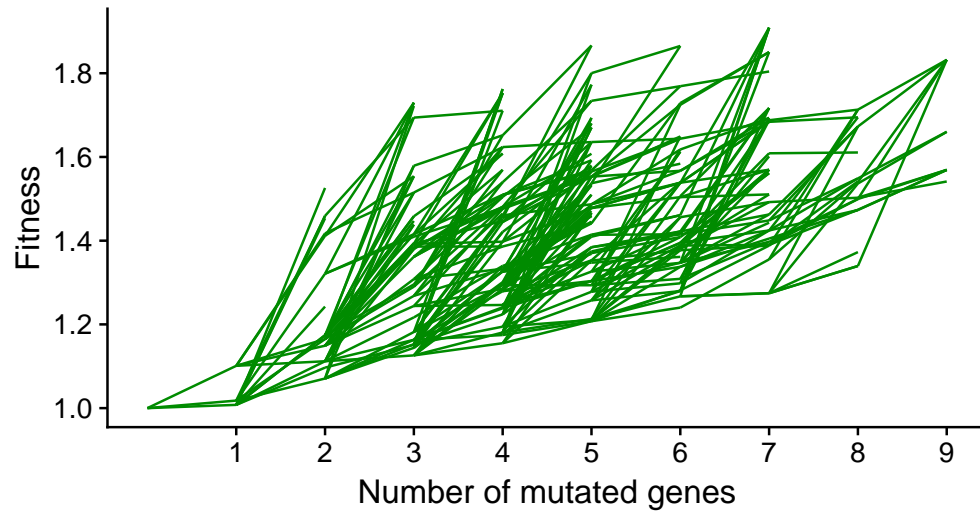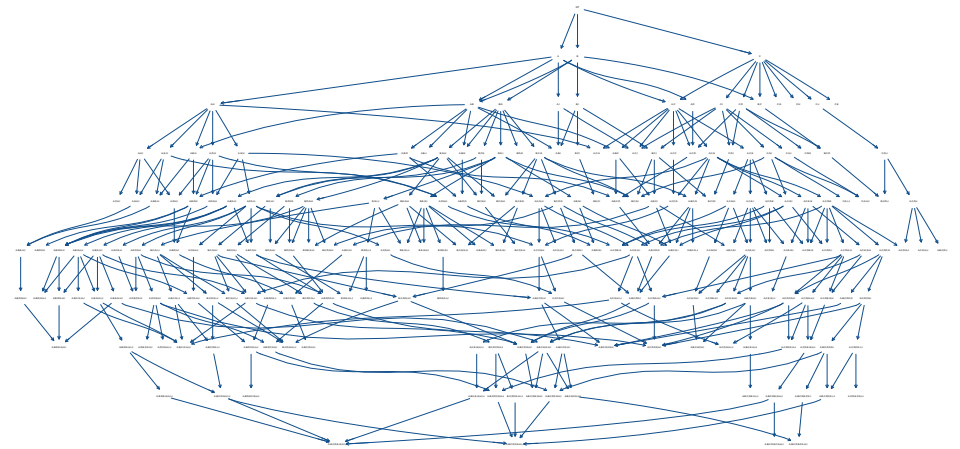

ID AXZ6AsdBROkekeDx  
acc genotypes 327  
peaks no back 60  
removed edges NA  
prop rem edges NA

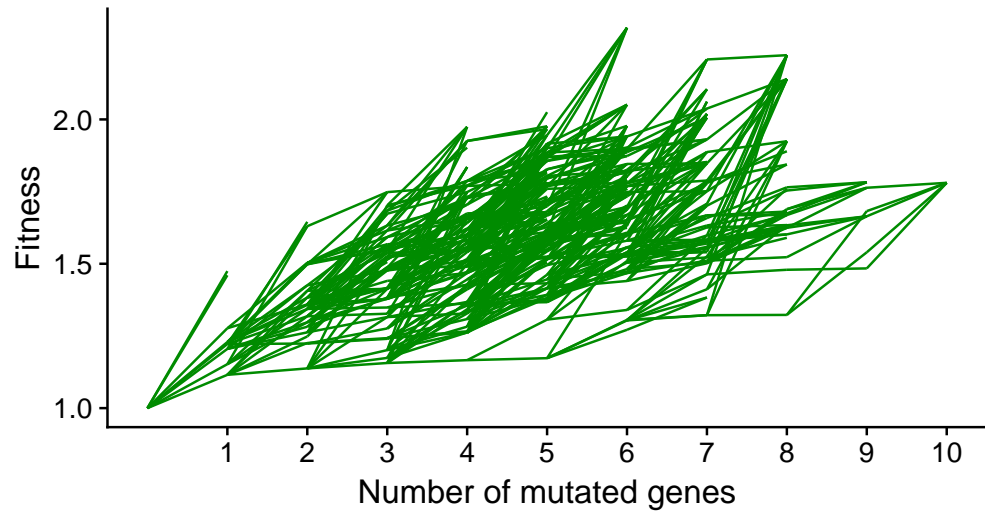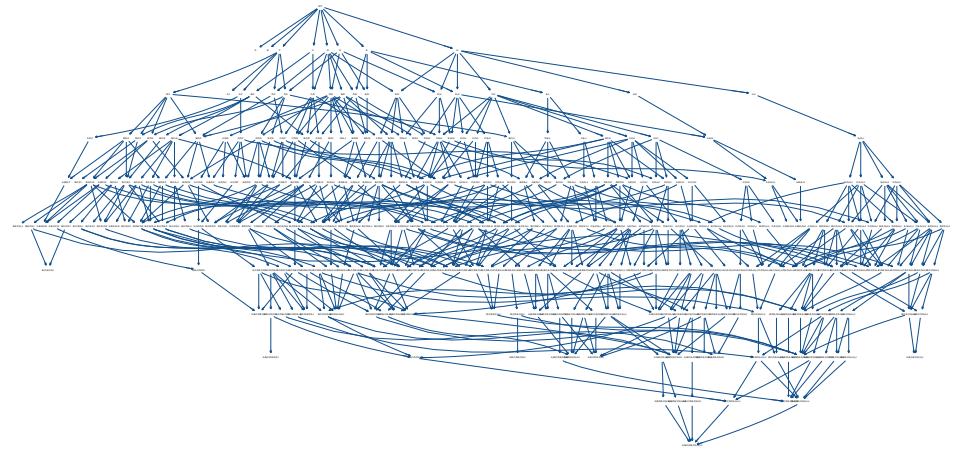

ID bFdmuJ1681ocZTYL  
acc genotypes 359  
peaks no back 88  
removed edges NA  
prop rem edges NA

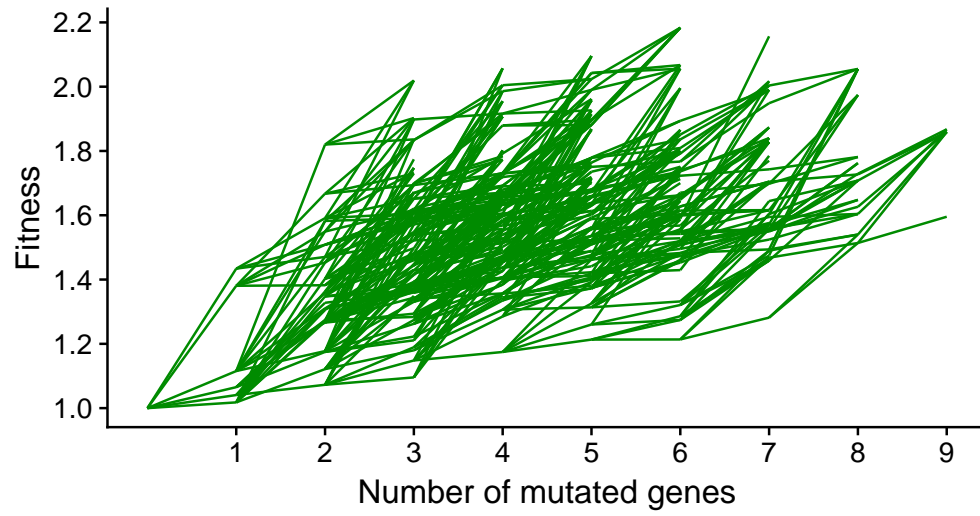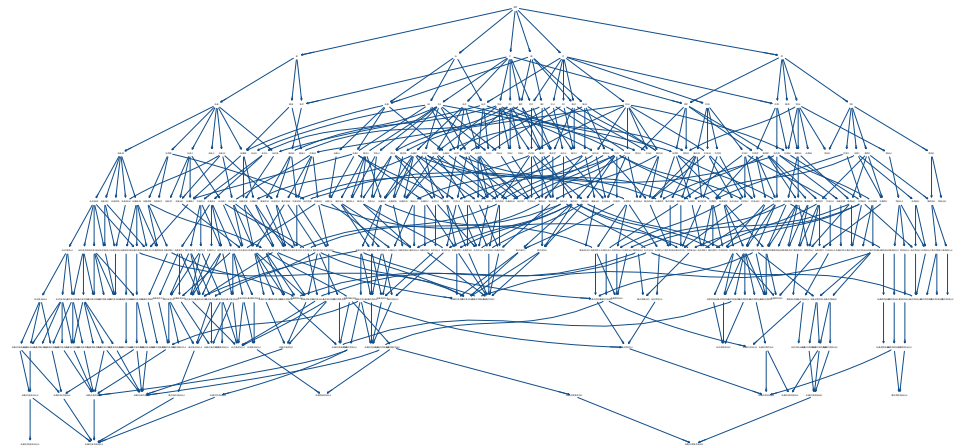

ID **bGijXeZCPrfEOBki**  
acc genotypes **183**  
peaks no back **53**  
removed edges **NA**  
prop rem edges **NA**

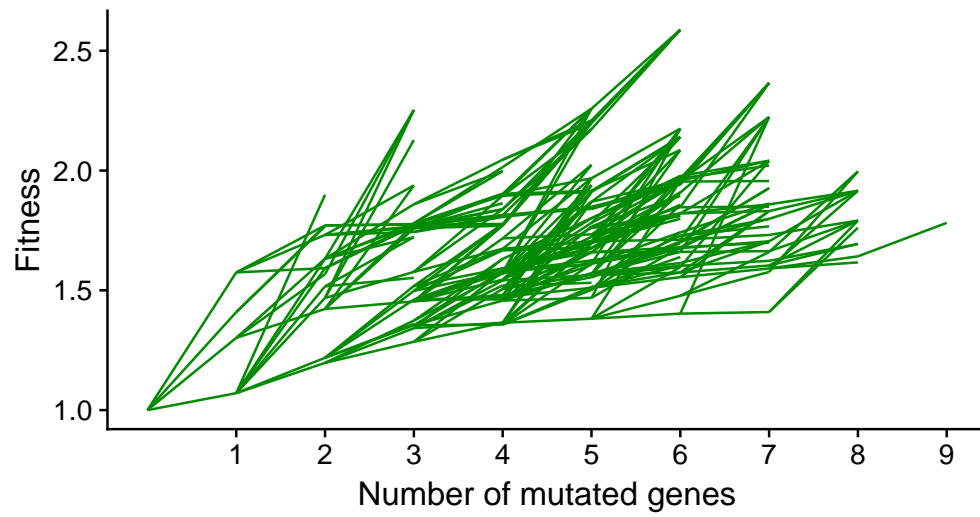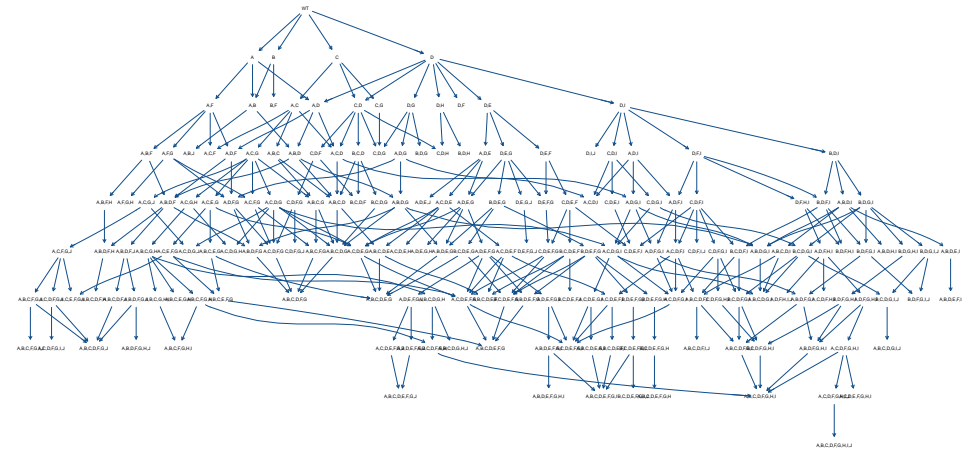

*ID* BnCqeBo4erAk6AAn  
*acc genotypes* 616  
*peaks no back* 76  
*removed edges* NA  
*prop rem edges* NA

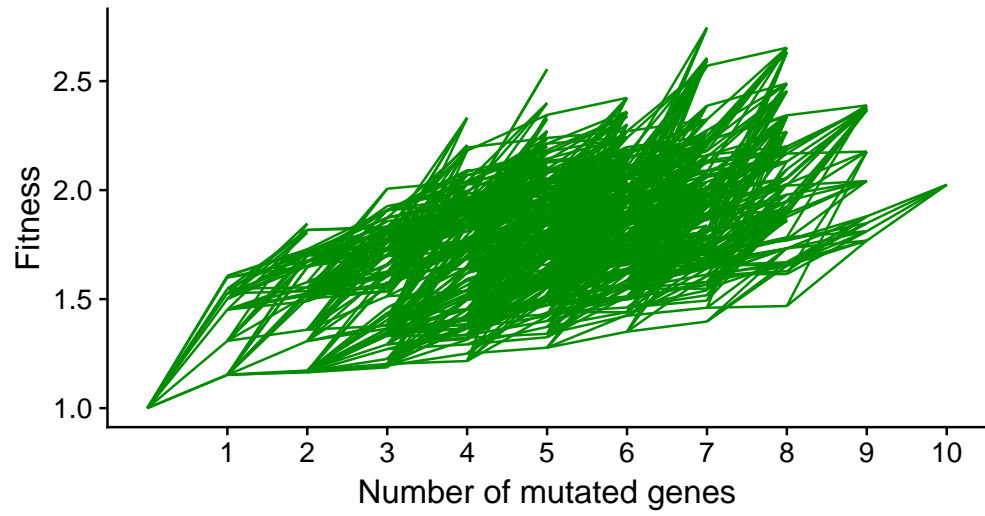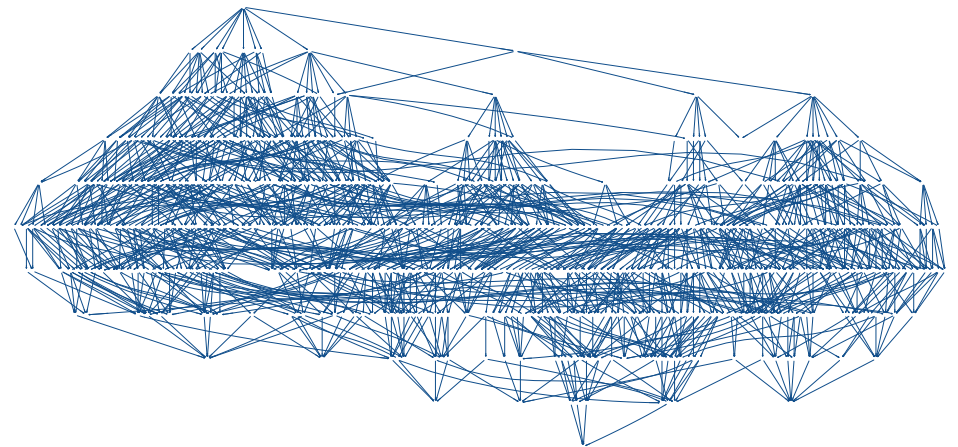

ID **bo1swth9Yj610ESJy**  
 acc genotypes **133**  
 peaks no back 40  
 removed edges NA  
 prop rem edges NA

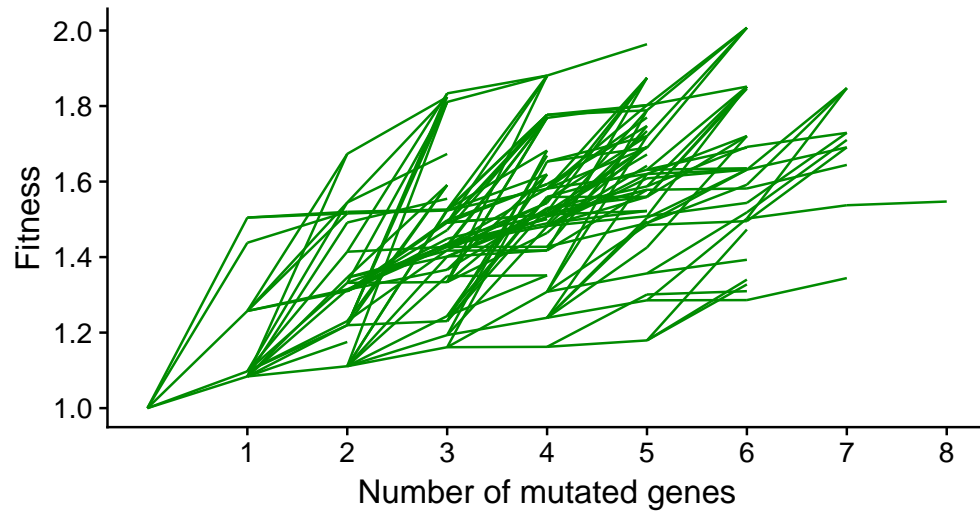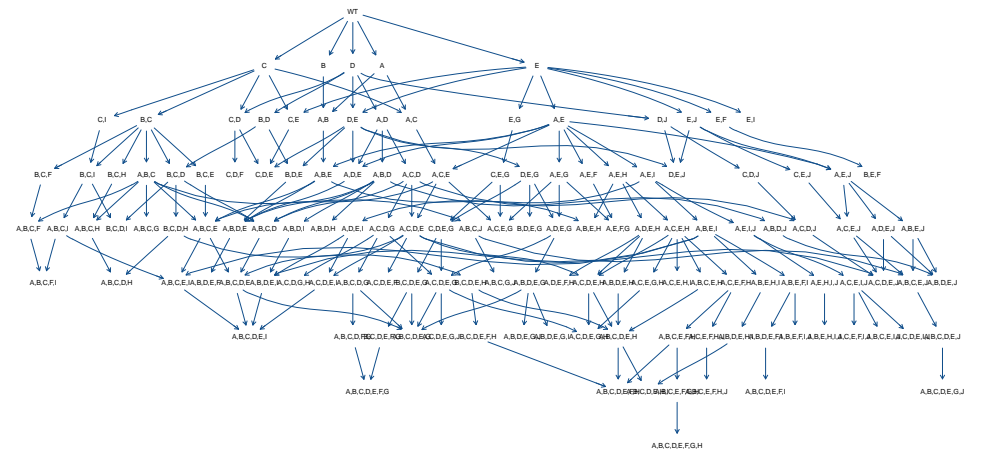

ID **bOw7SJCwZBwfZRmf**  
acc genotypes **187**  
peaks no back 71  
removed edges NA  
prop rem edges NA

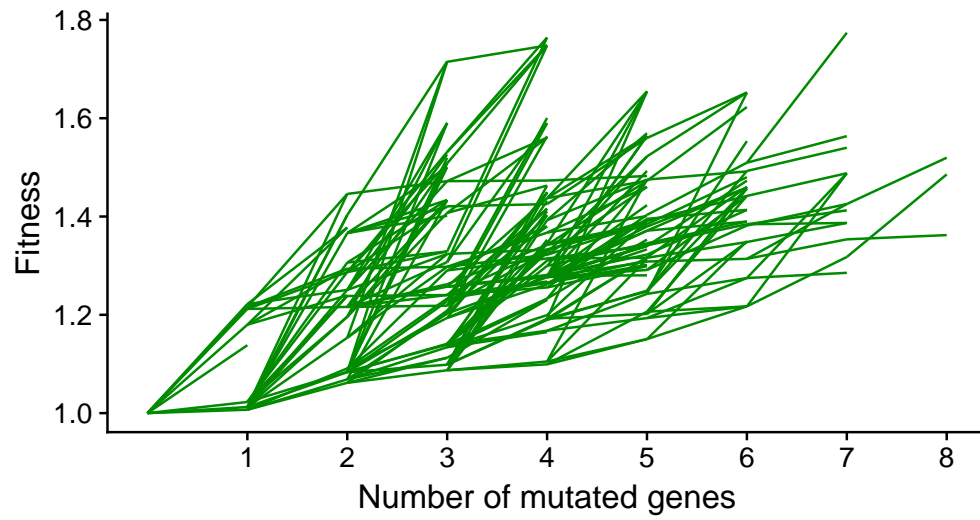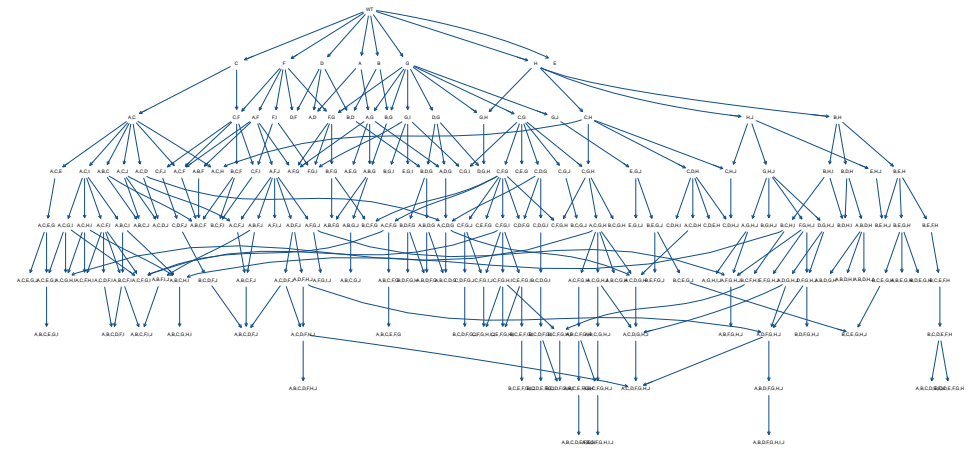

ID BtsRtS3YmmkCe2Gg  
 acc genotypes 50  
 peaks no back 18  
 removed edges NA  
 prop rem edges NA

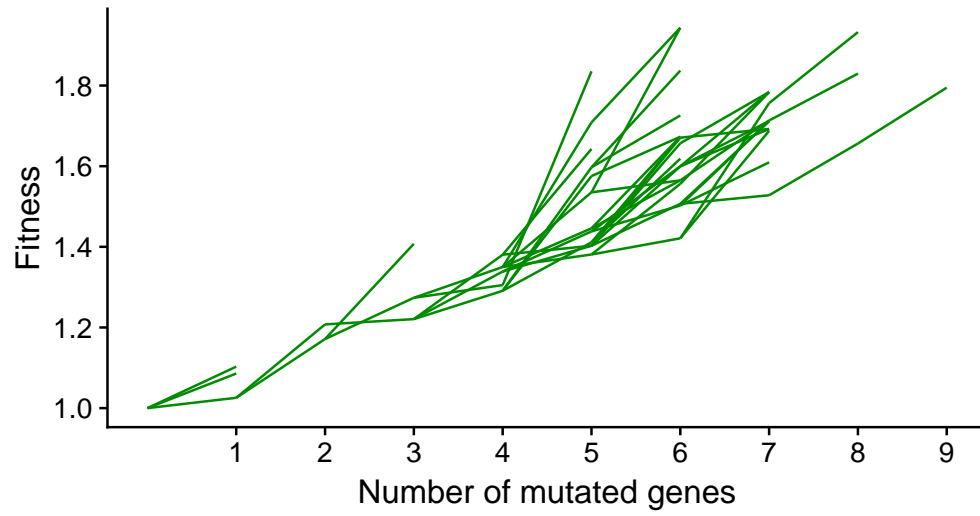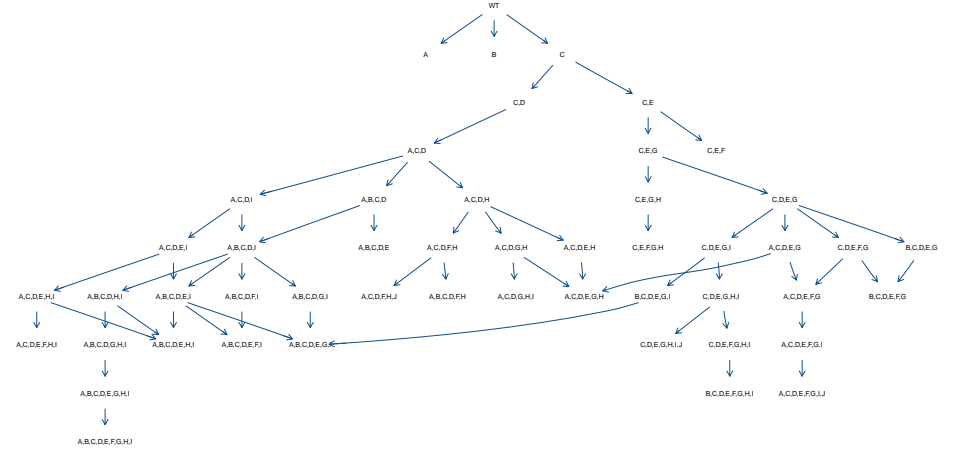



*ID* BWbL4g3bDhB87PnG  
*acc genotypes* 405  
*peaks no back* 99  
*removed edges* NA  
*prop rem edges* NA

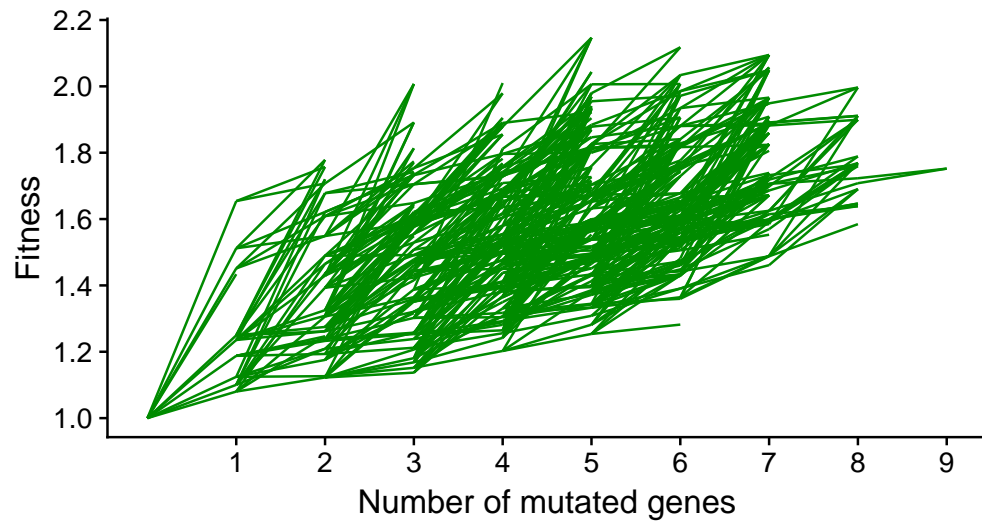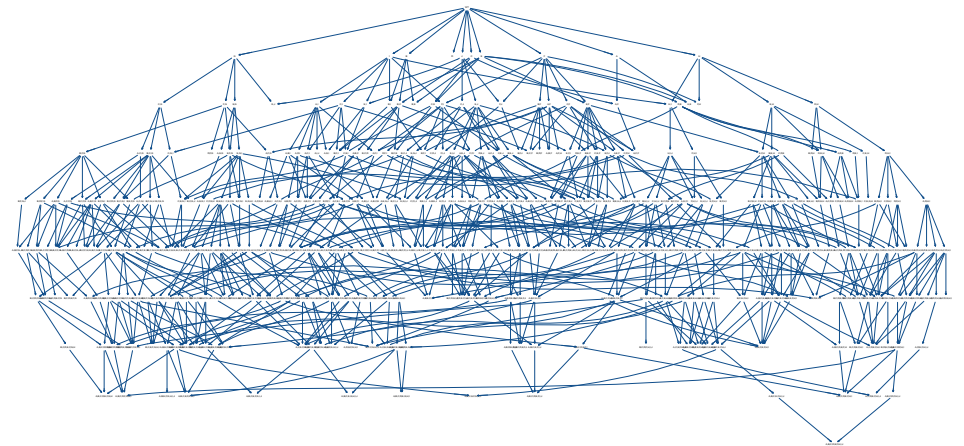

ID C1zvP9CZFCg9avLi  
 acc genotypes 102  
 peaks no back 44  
 removed edges NA  
 prop rem edges NA

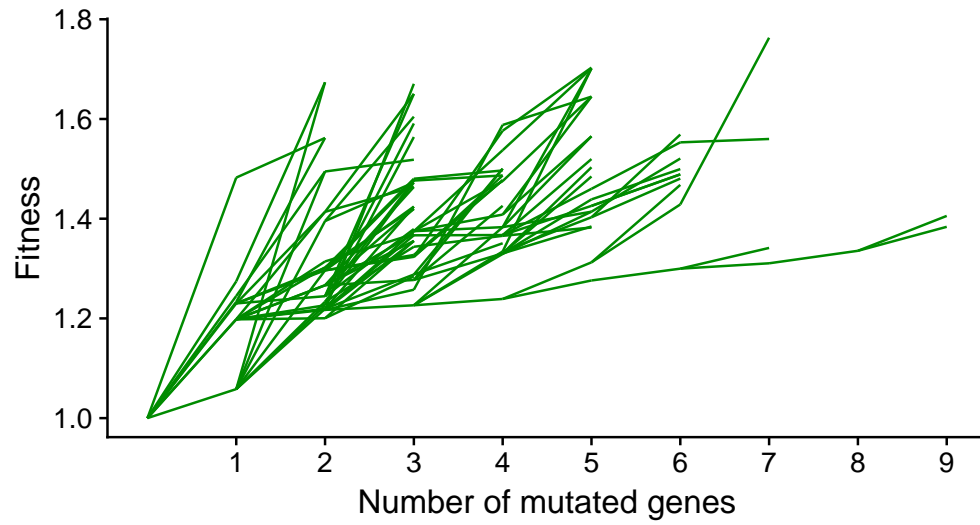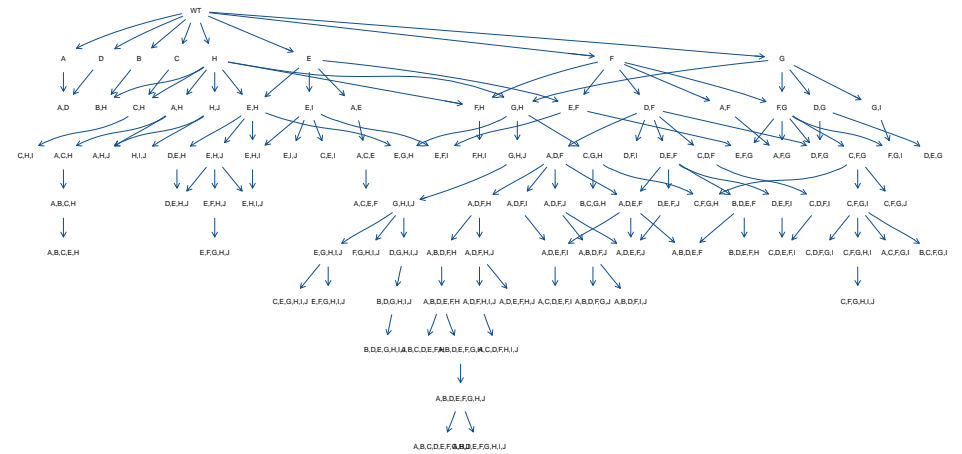

*ID* c21LhpXICZKWnkC5  
*acc genotypes* 493  
*peaks no back* 93  
*removed edges* NA  
*prop rem edges* NA

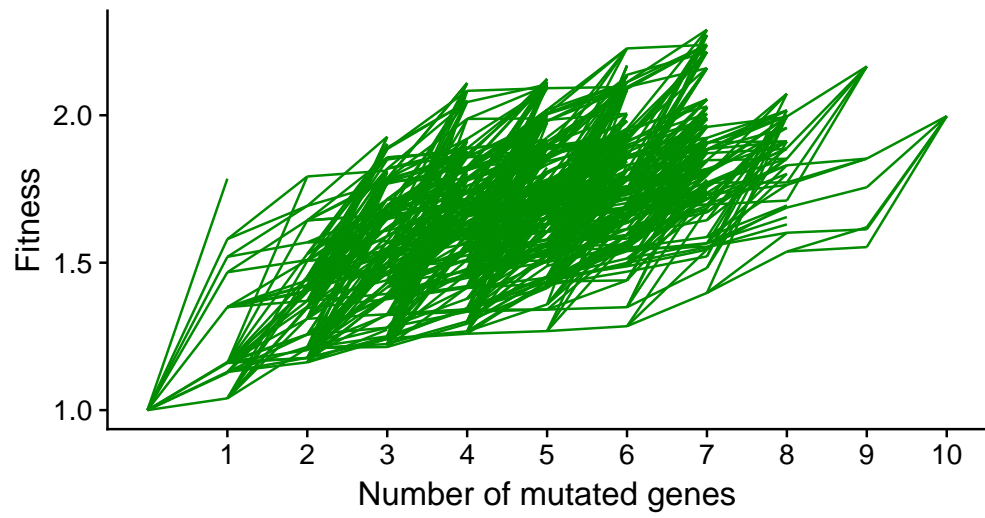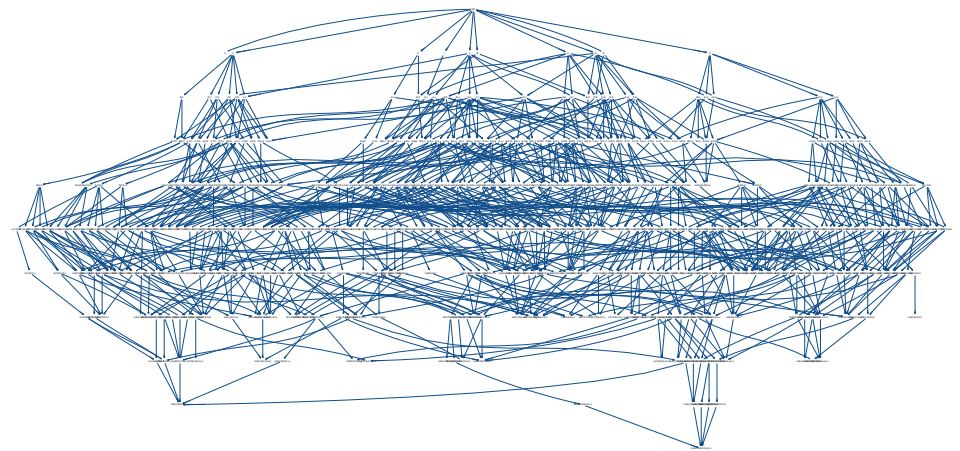

ID C46MDiN7E3KDR5Fu  
acc genotypes 143  
peaks no back 61  
removed edges NA  
prop rem edges NA

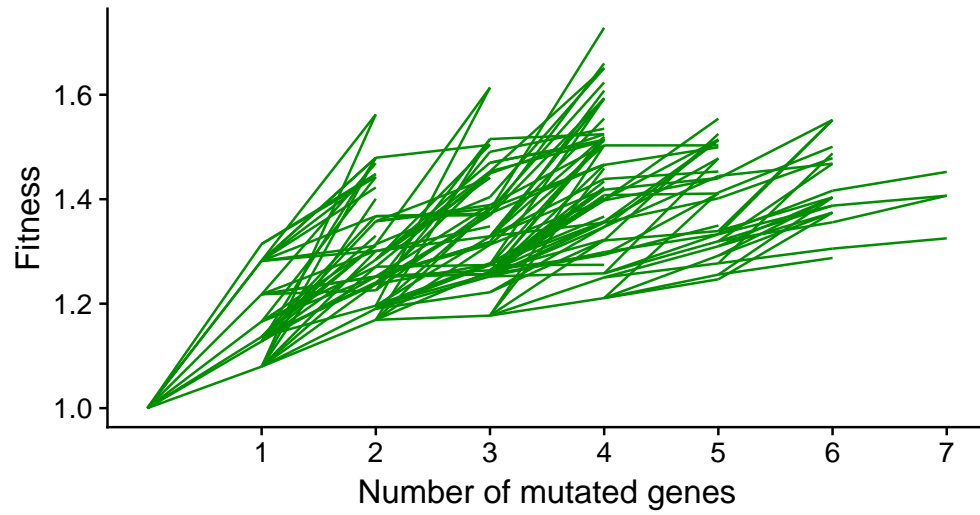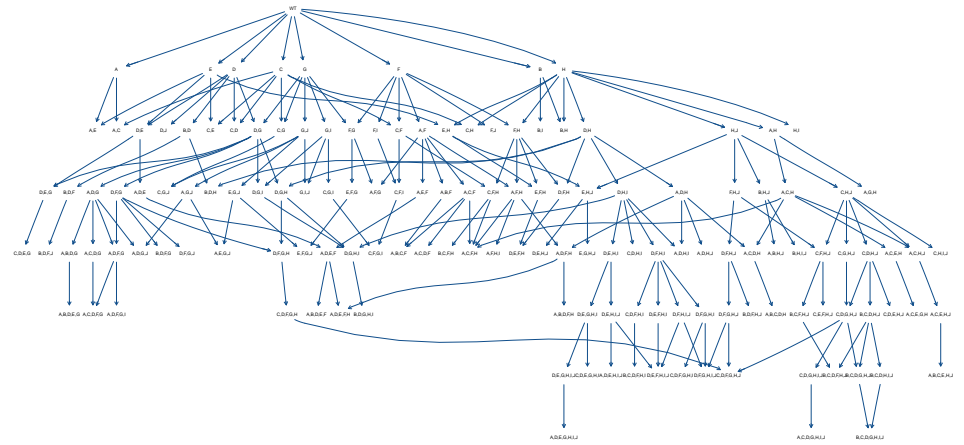

ID COoTZ3S17BxN8HQx  
acc genotypes 209  
peaks no back 75  
removed edges NA  
prop rem edges NA

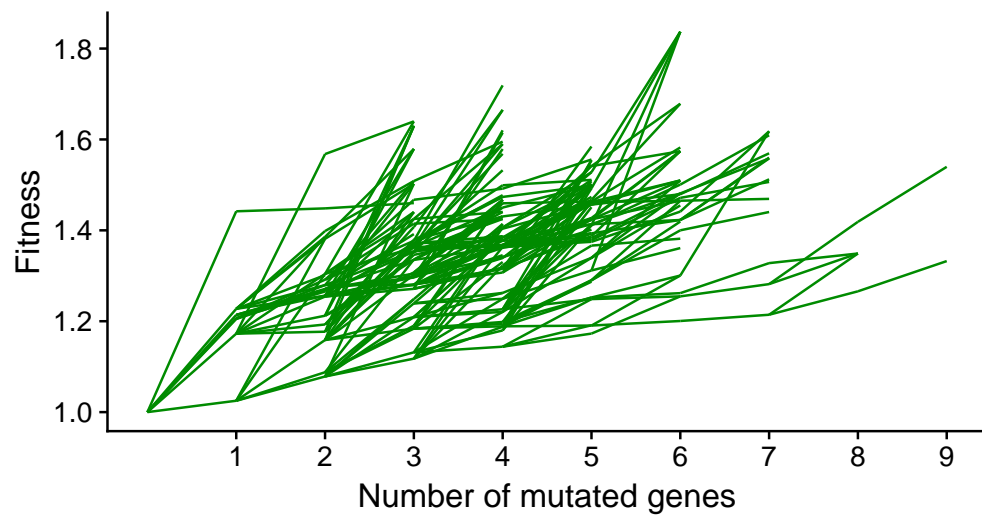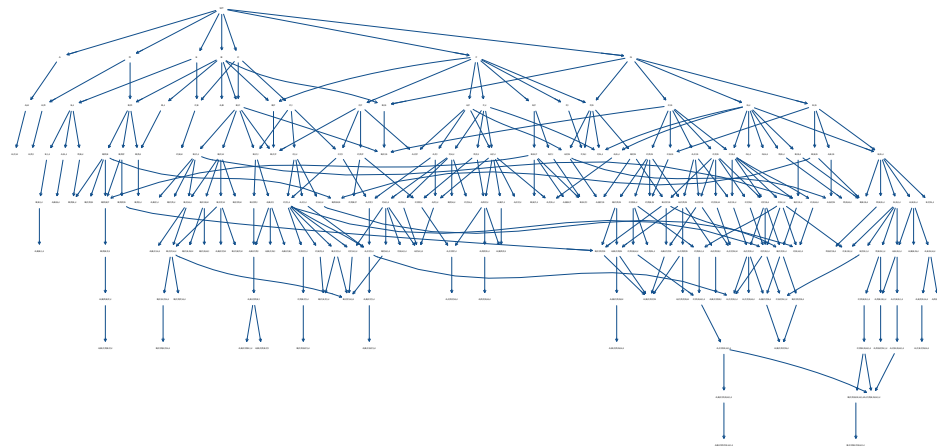

ID CscphnR9HTju10jKi  
 acc genotypes 54  
 peaks no back 14  
 removed edges NA  
 prop rem edges NA

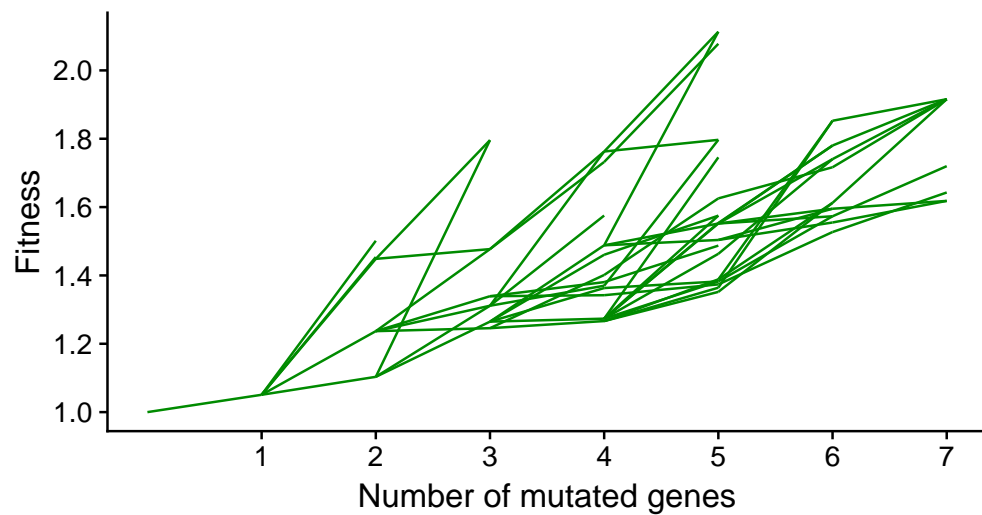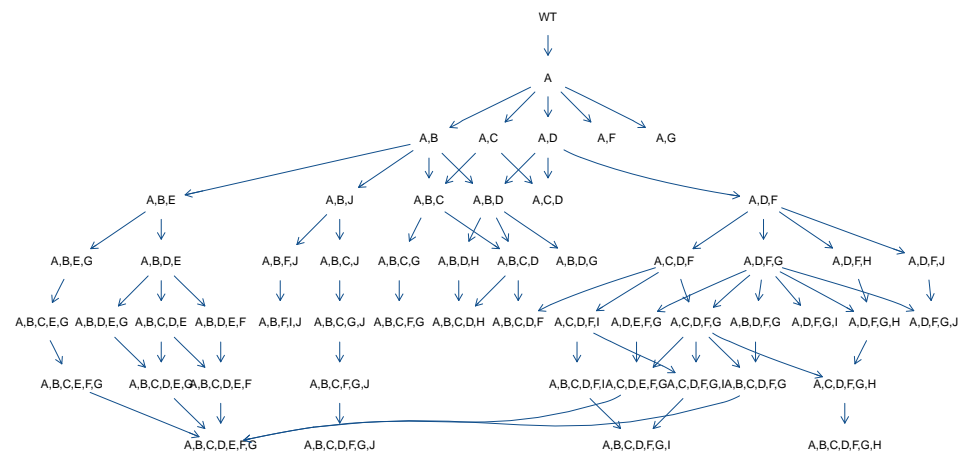

ID CxyKl8ZkyGMIHEBy  
acc genotypes 101  
peaks no back 37  
removed edges NA  
prop rem edges NA

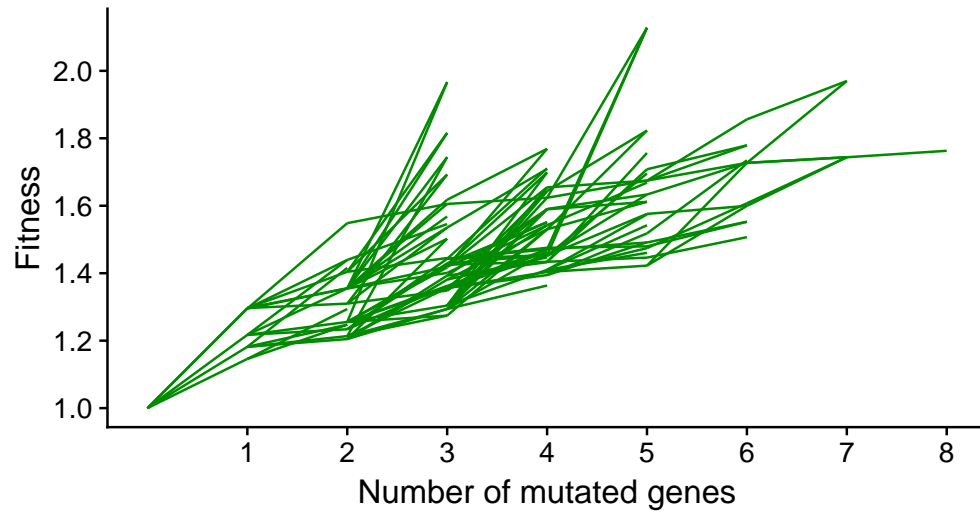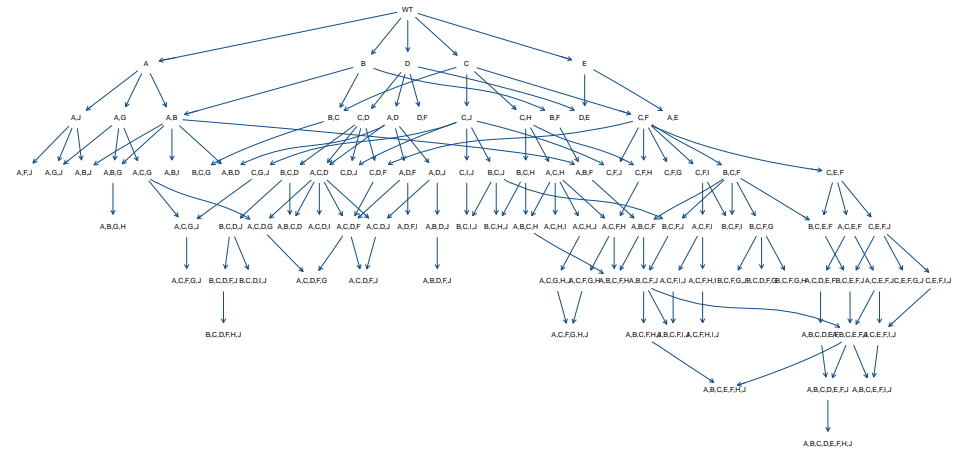

ID d107ojrARayuzrHeN  
acc genotypes 482  
peaks no back 107  
removed edges NA  
prop rem edges NA

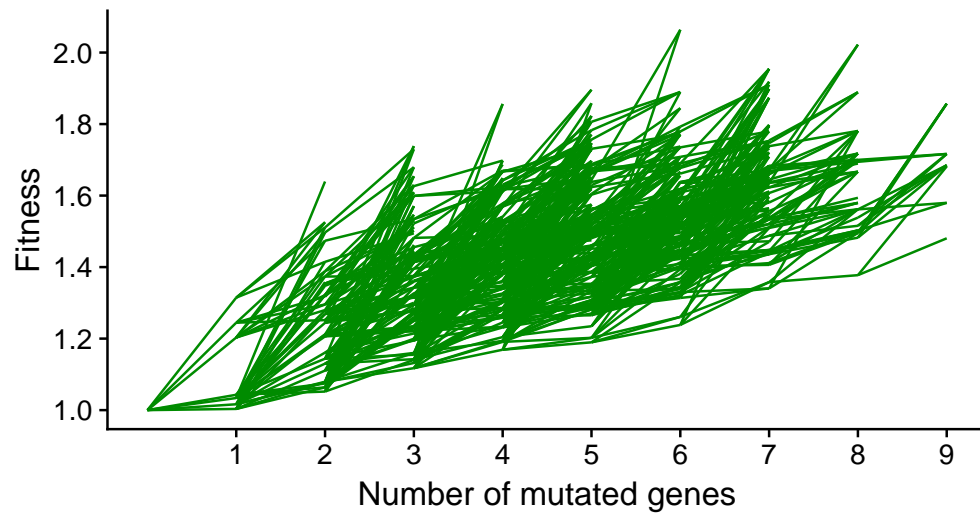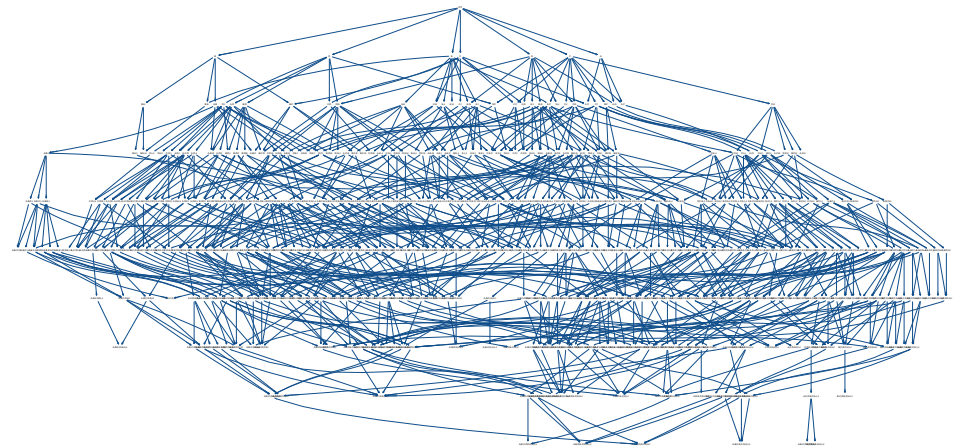



ID DF1iteAjjgrOq9G  
acc genotypes 240  
peaks no back 84  
removed edges NA  
prop rem edges NA

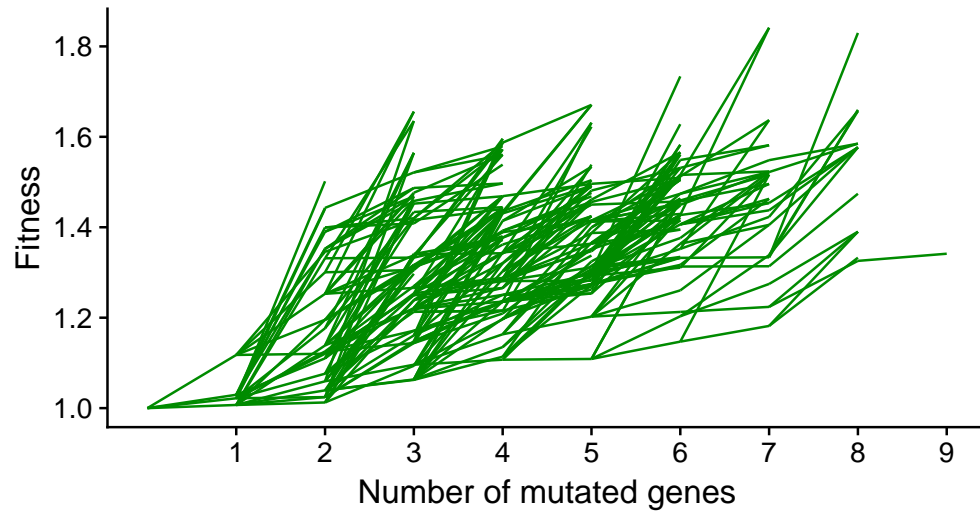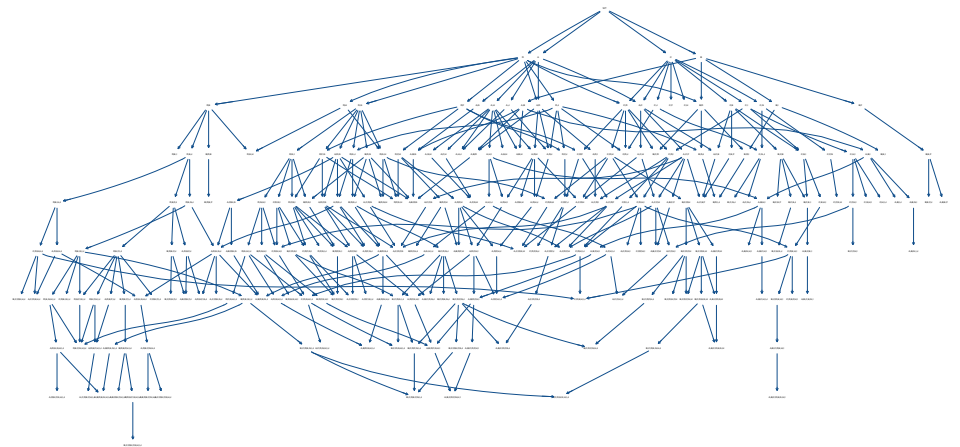

*ID* DvGWOEzyGFaVOowT  
*acc genotypes* 577  
*peaks no back* 93  
*removed edges* NA  
*prop rem edges* NA

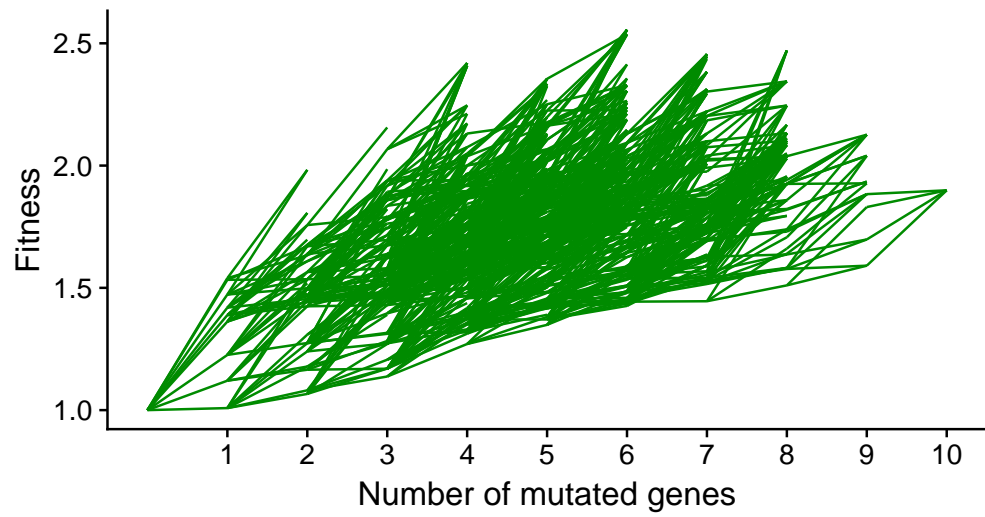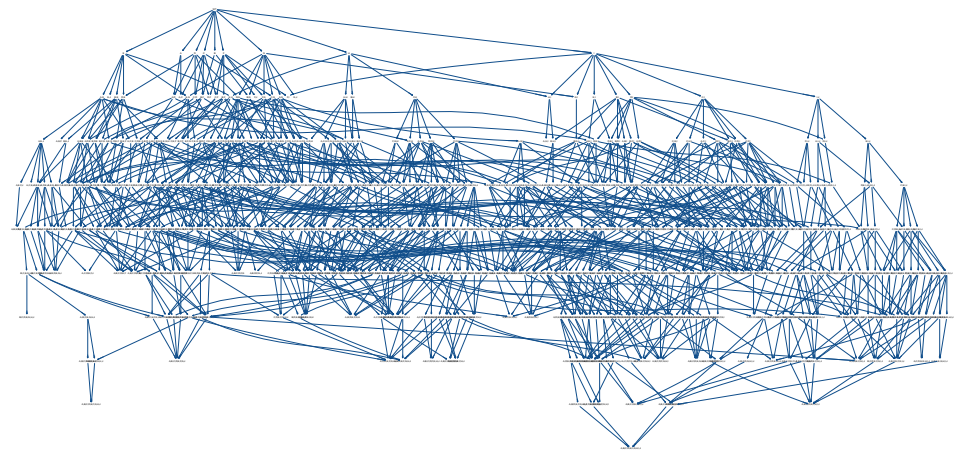

*ID* dzb40OvYv11WGeeP  
*acc genotypes* 394  
*peaks no back* 83  
*removed edges* NA  
*prop rem edges* NA

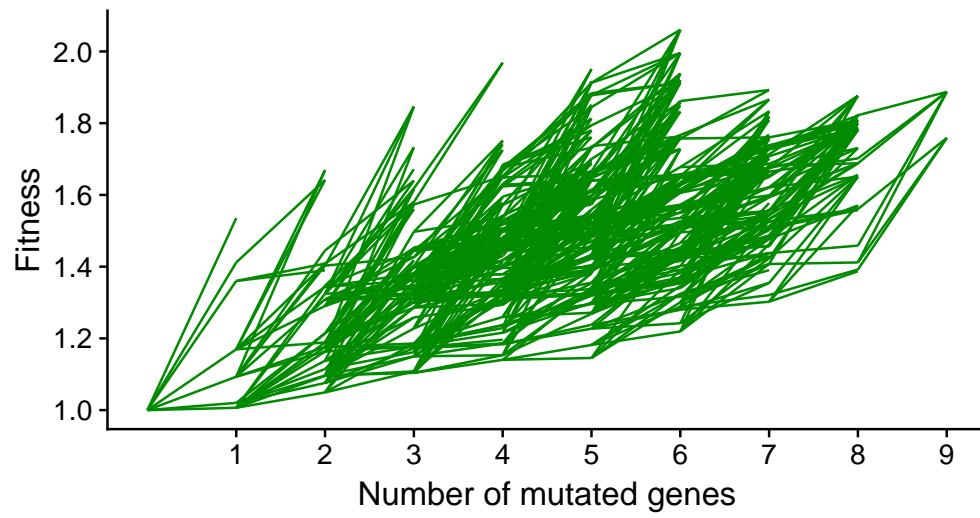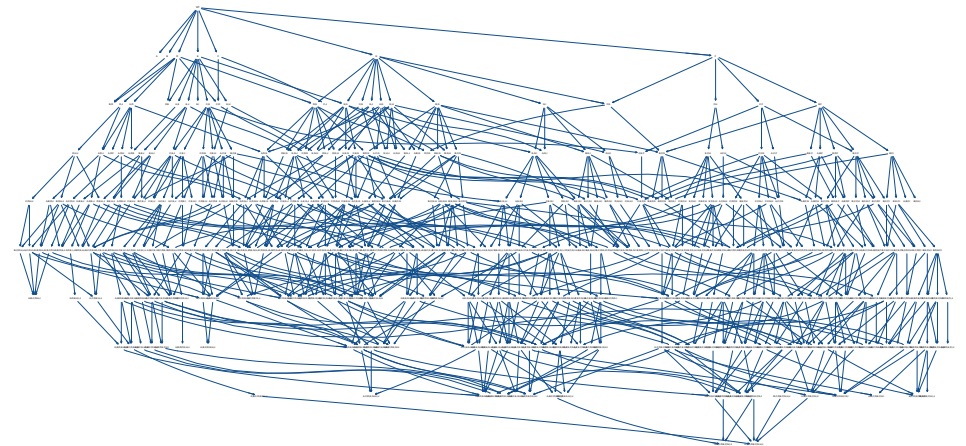

*ID* EgkeUuvhLZsyQQ110  
*acc genotypes* 283  
*peaks no back* 50  
*removed edges* NA  
*prop rem edges* NA

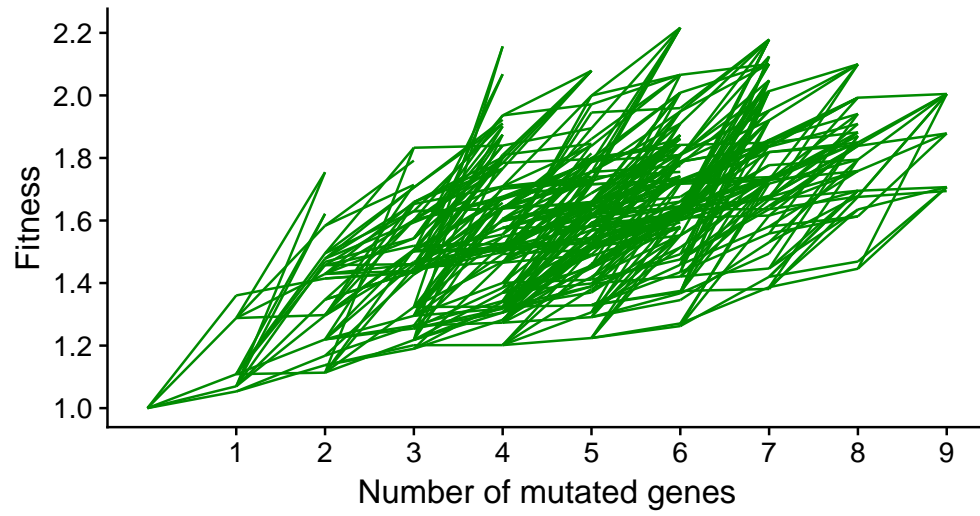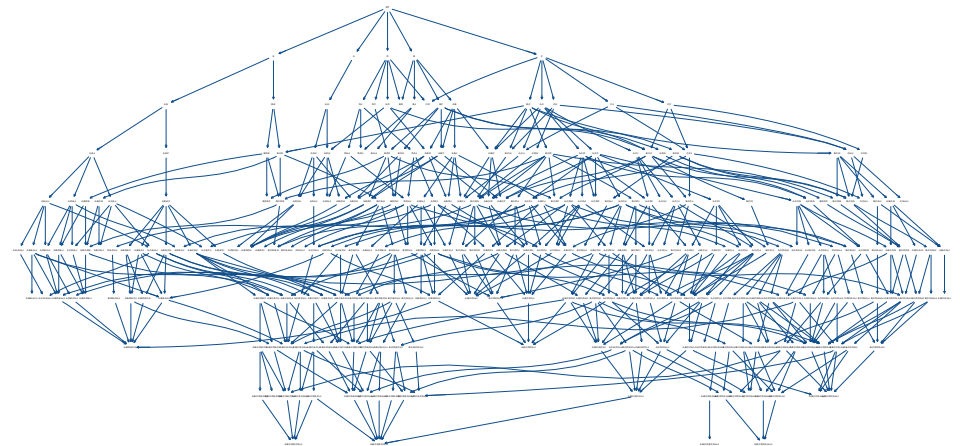

ID eII49J4HyU8o710iq  
acc genotypes 576  
peaks no back 83  
removed edges NA  
prop rem edges NA

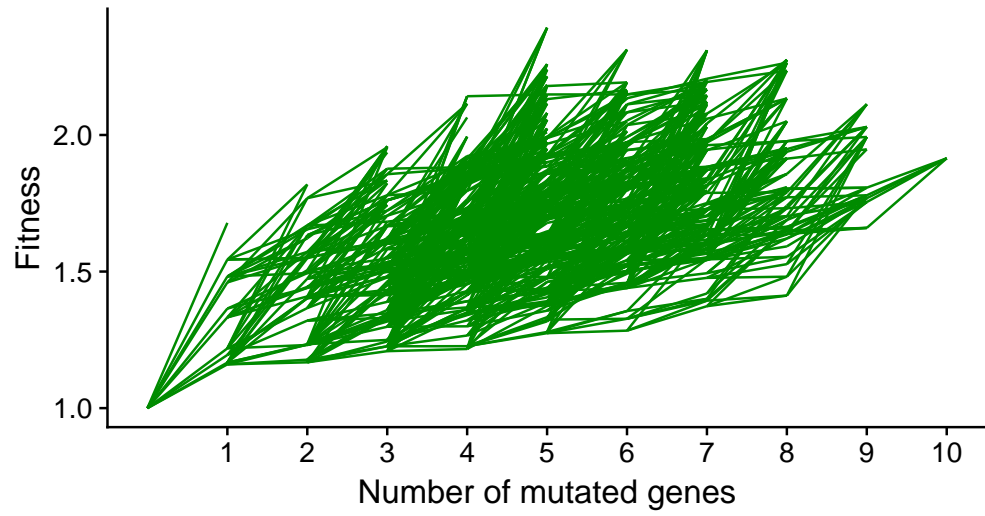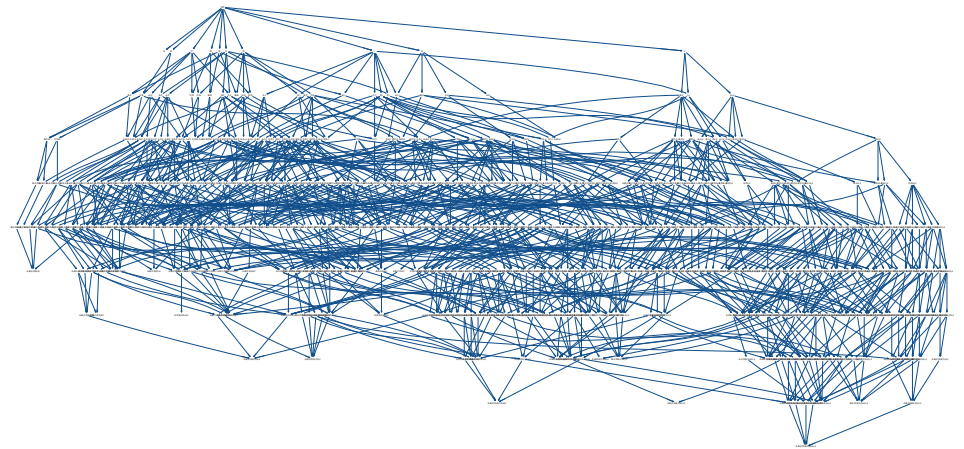

*ID* EMbpnzI5vOYpYkCY  
*acc genotypes* 262  
*peaks no back* 64  
*removed edges* NA  
*prop rem edges* NA

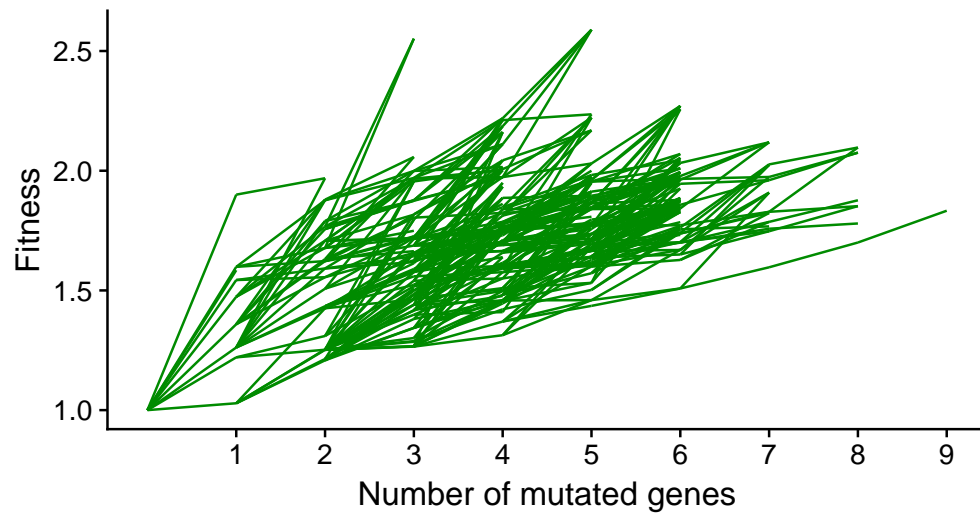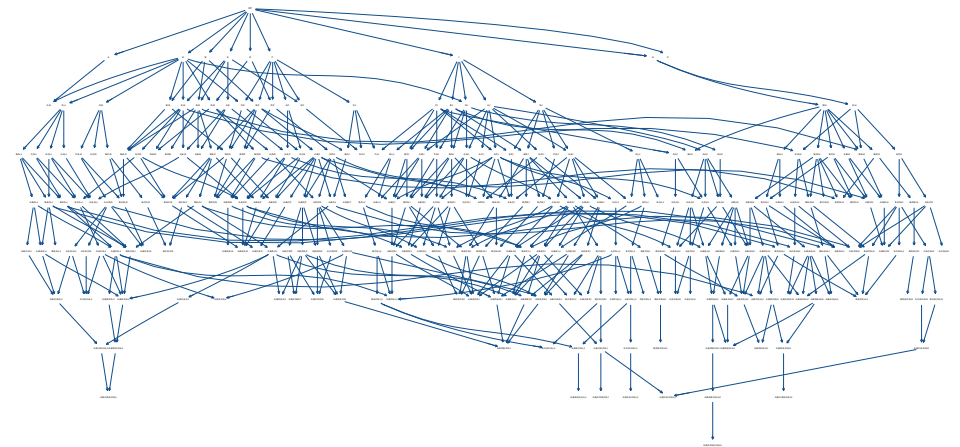

*ID* ERn91KUoSwG1g1w9  
*acc genotypes* 263  
*peaks no back* 93  
*removed edges* NA  
*prop rem edges* NA

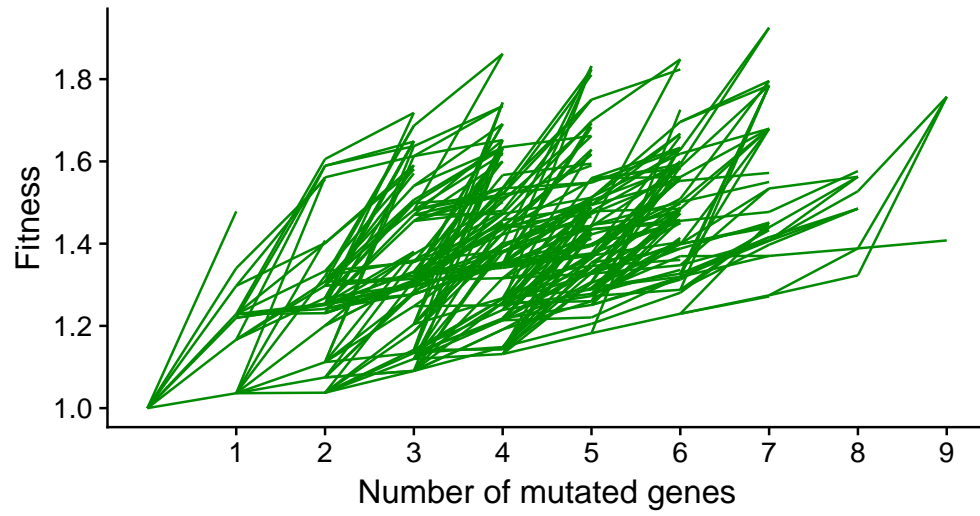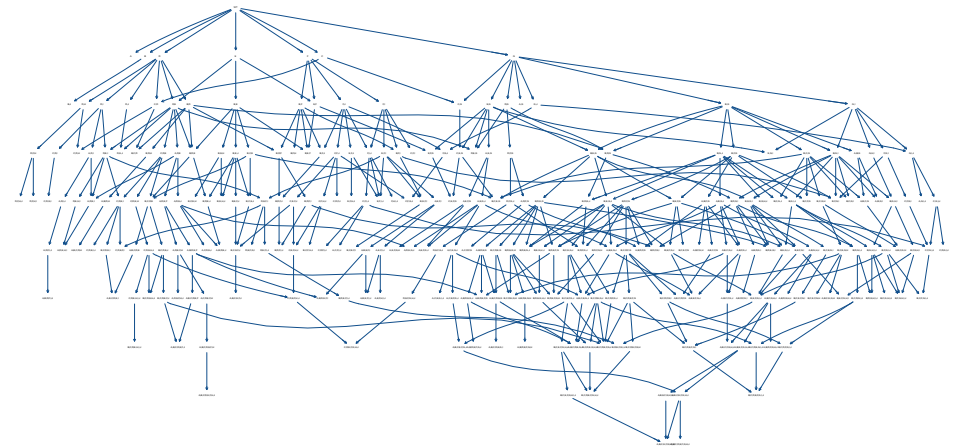

*ID* erQFJpuljZzlgwp  
*acc genotypes* 377  
*peaks no back* 75  
*removed edges* NA  
*prop rem edges* NA

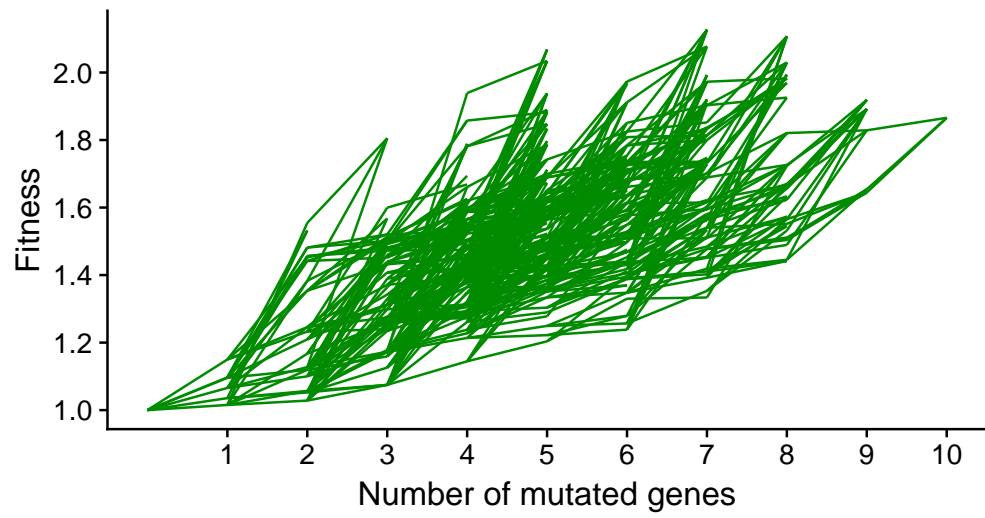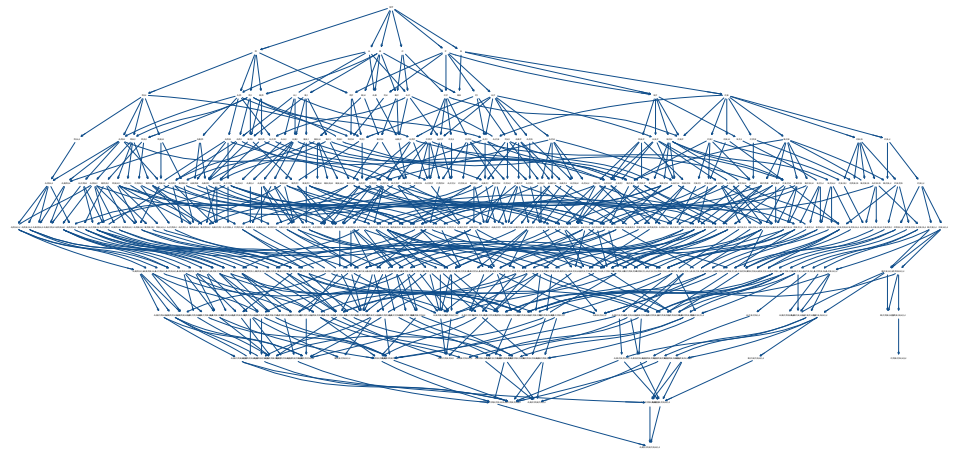



ID EV5PzPVJ8yEpuh5C  
 acc genotypes 33  
 peaks no back 13  
 removed edges NA  
 prop rem edges NA

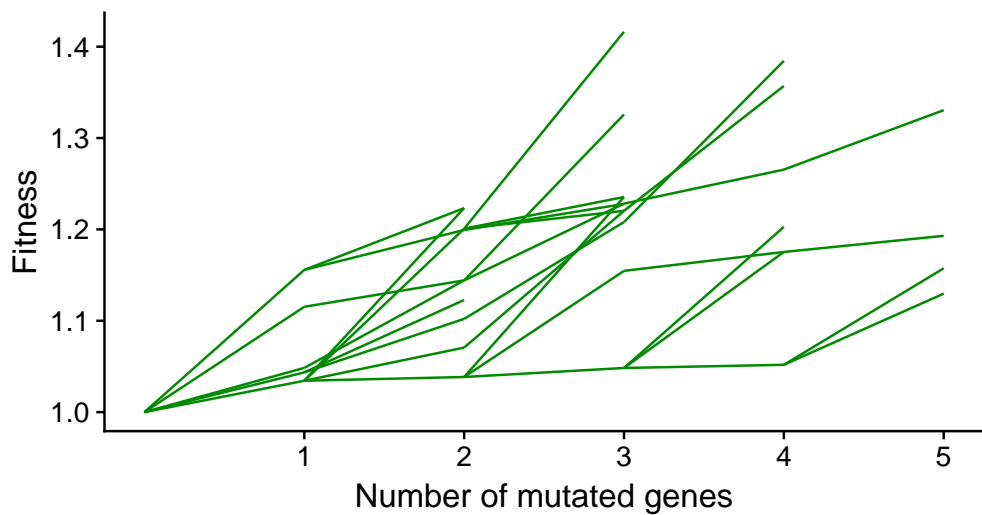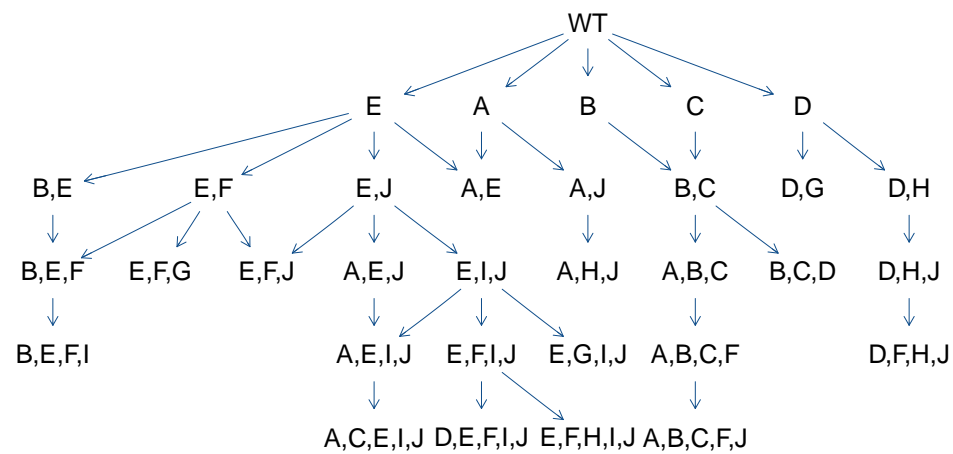

ID f4IIMrTtiuCuX6MS  
acc genotypes 540  
peaks no back 122  
removed edges NA  
prop rem edges NA

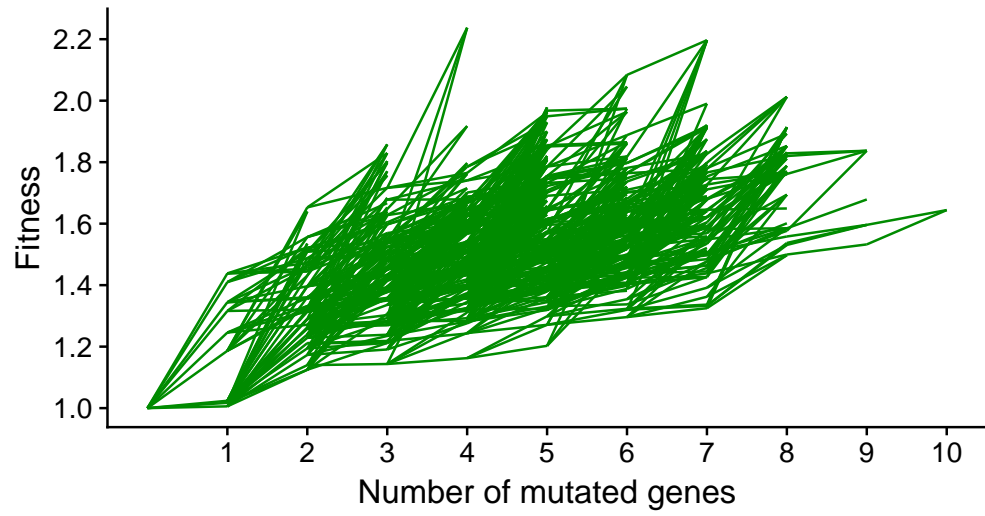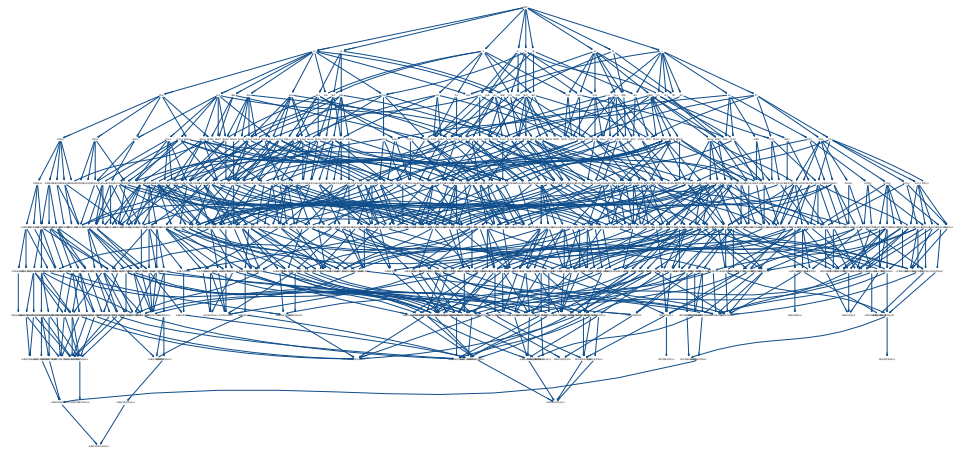

ID FcL7VfUNU6lgd6e  
acc genotypes 400  
peaks no back 62  
removed edges NA  
prop rem edges NA

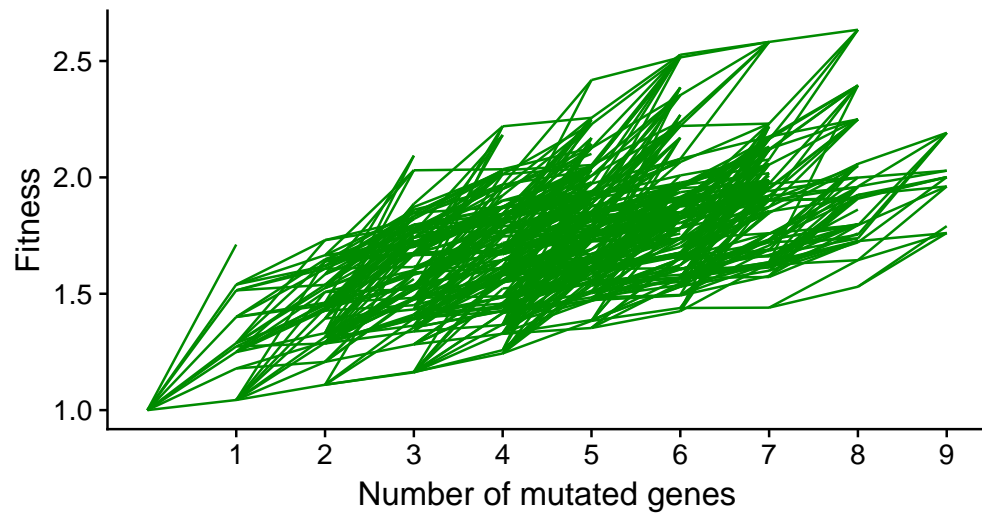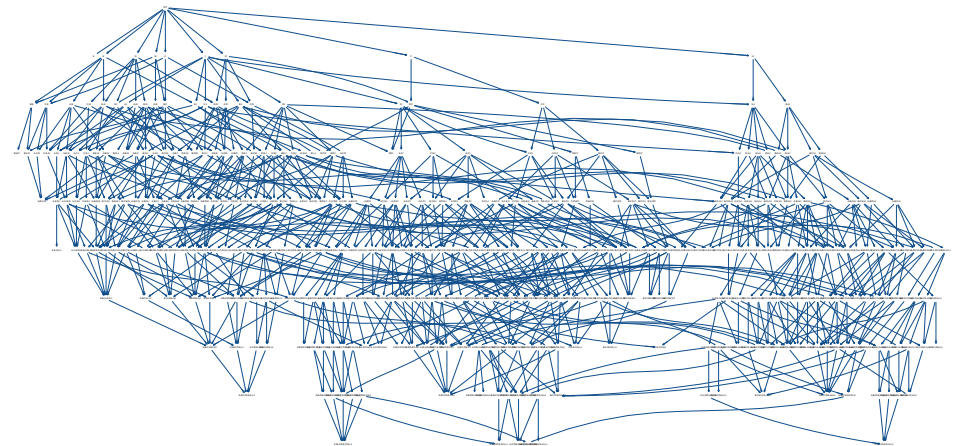

ID fhP10WIHL7710GBMFE  
acc genotypes 412  
peaks no back 90  
removed edges NA  
prop rem edges NA

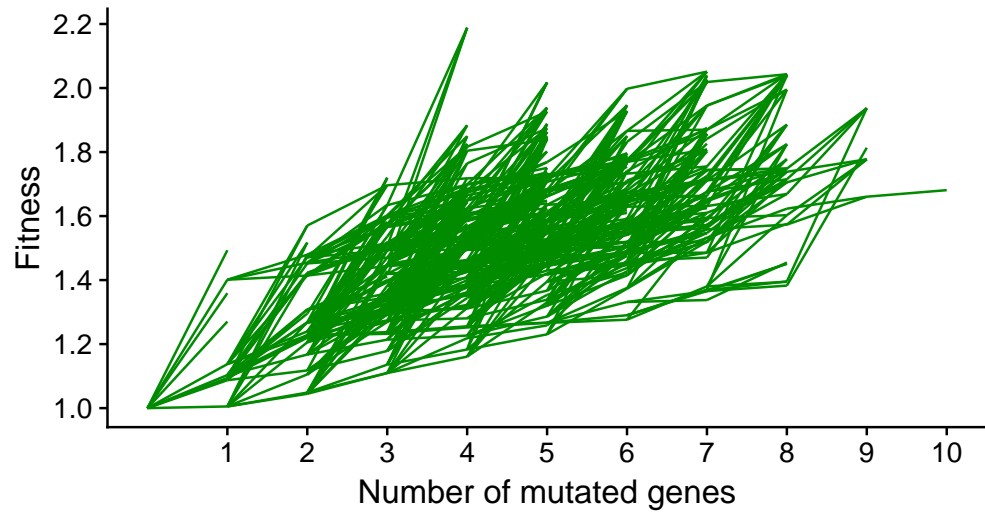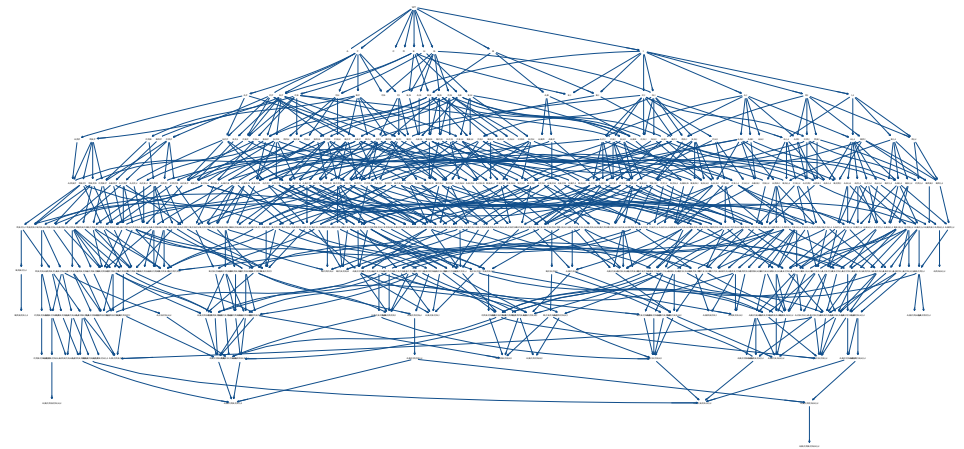

ID **flL7P19LmiLt1csg**  
acc genotypes **338**  
peaks no back 63  
removed edges NA  
prop rem edges NA

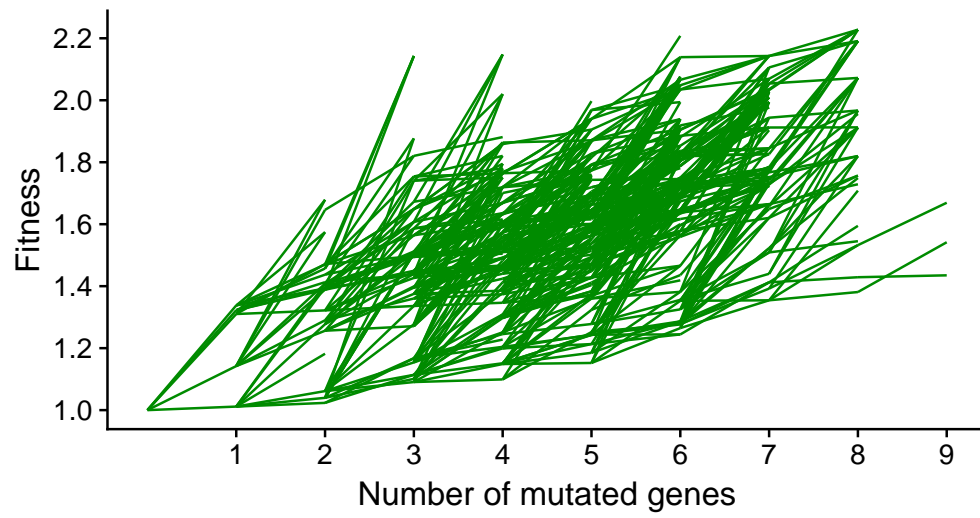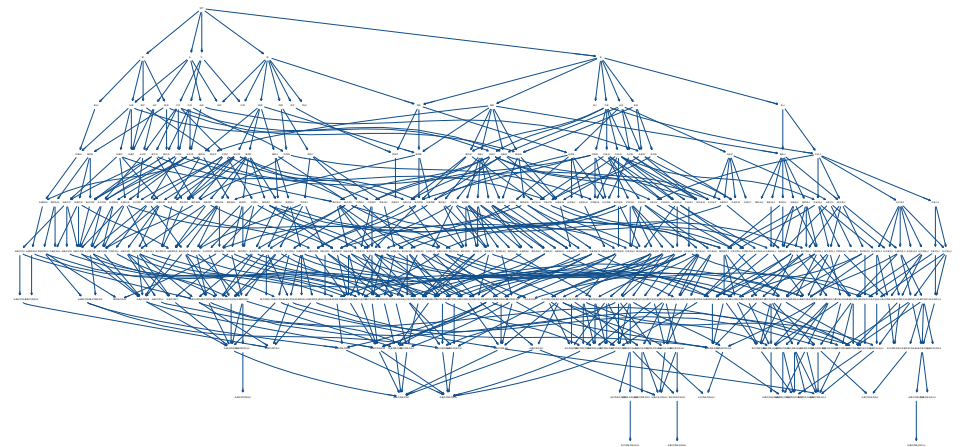

ID FJPvUaTzze1FXsAz  
acc genotypes 459  
peaks no back 81  
removed edges NA  
prop rem edges NA

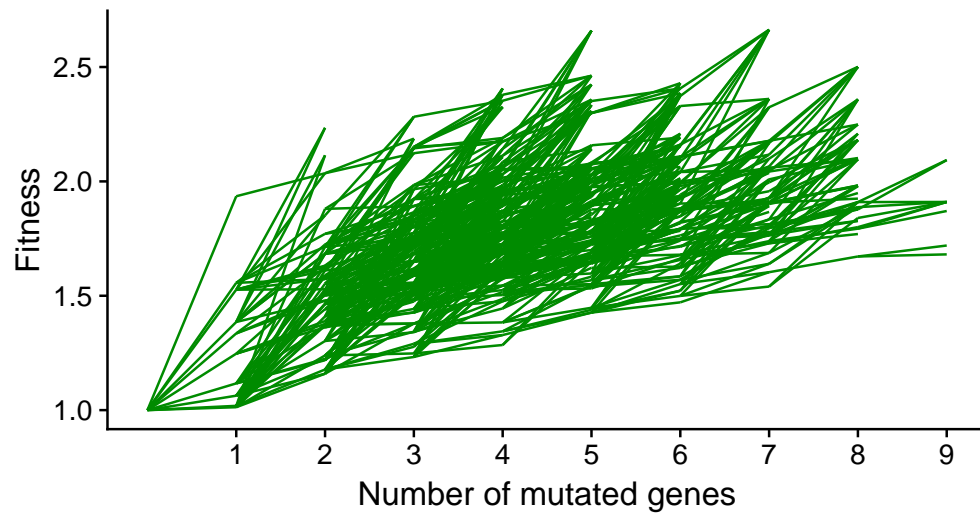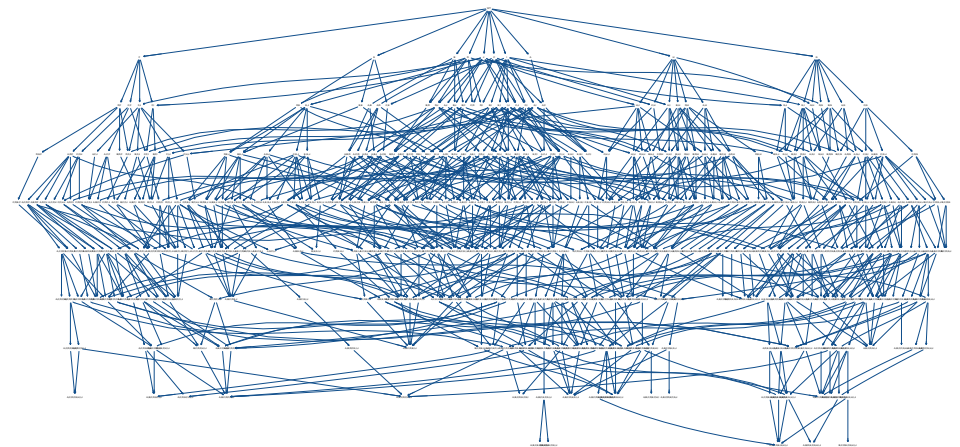

ID fpSFxSYrkAEuTBdj  
acc genotypes 355  
peaks no back 123  
removed edges NA  
prop rem edges NA

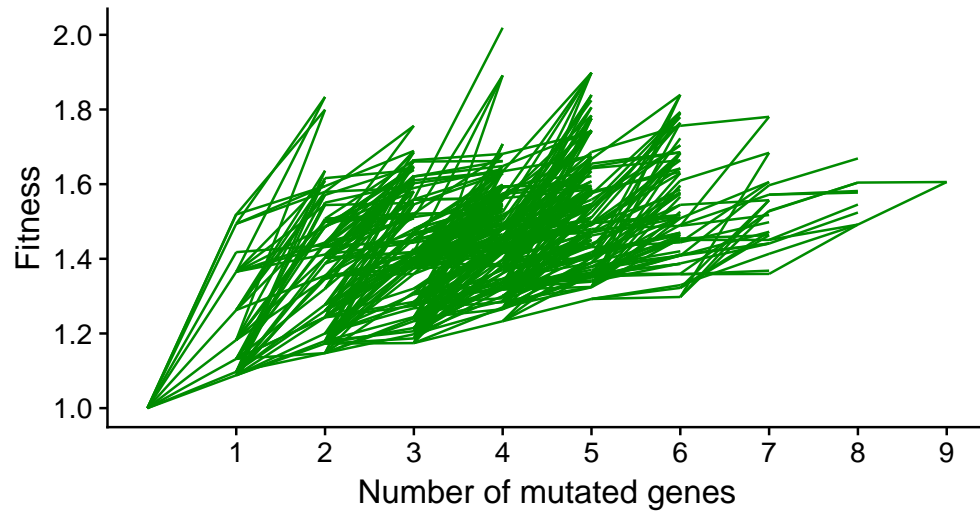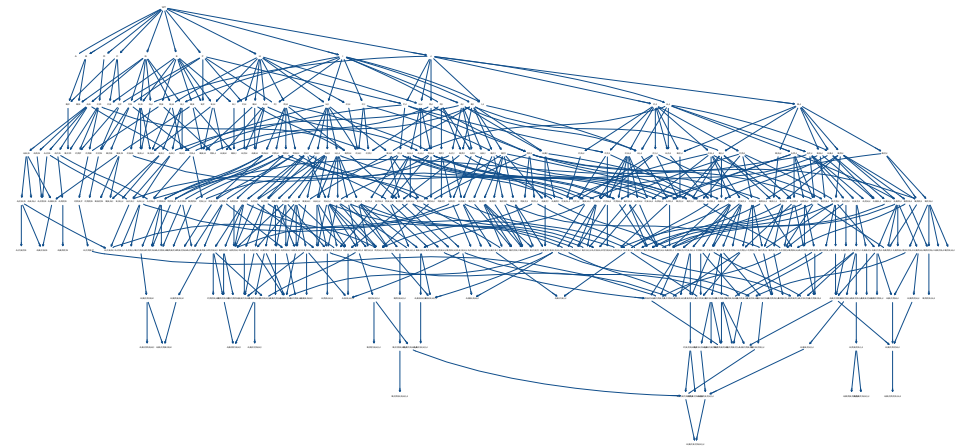

ID FSw8uHKnSnOw6Xrh  
 acc genotypes 124  
 peaks no back 32  
 removed edges NA  
 prop rem edges NA

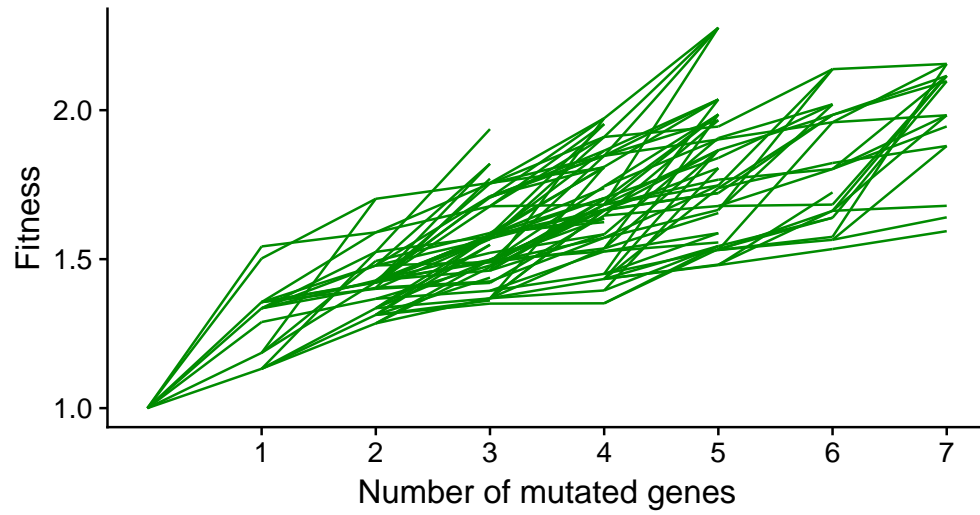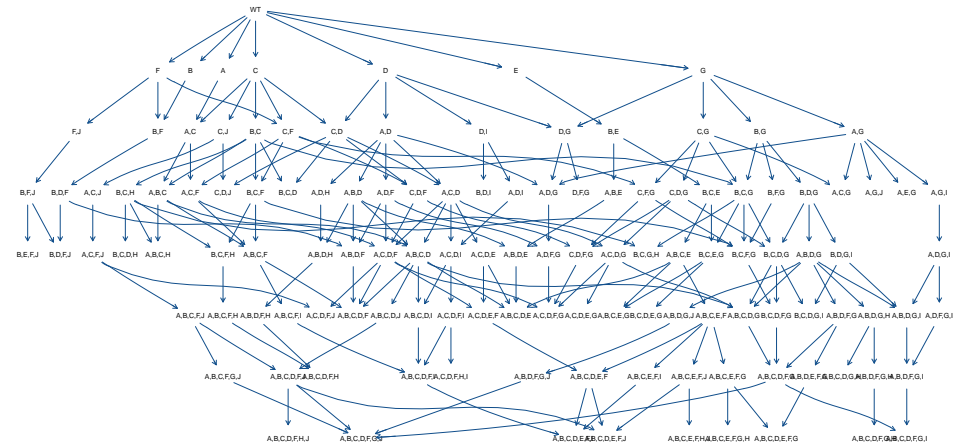



ID fWEJplAFKvHJAViu  
acc genotypes 208  
peaks no back 52  
removed edges NA  
prop rem edges NA

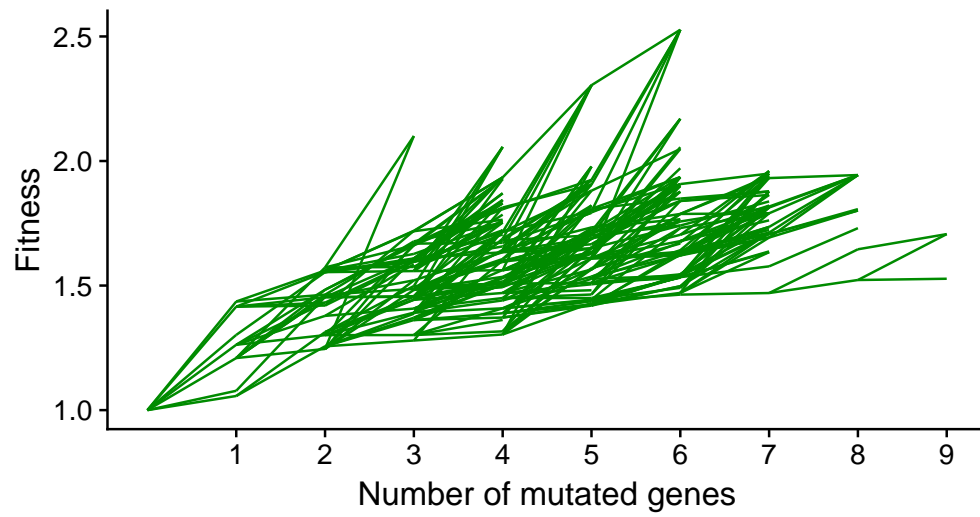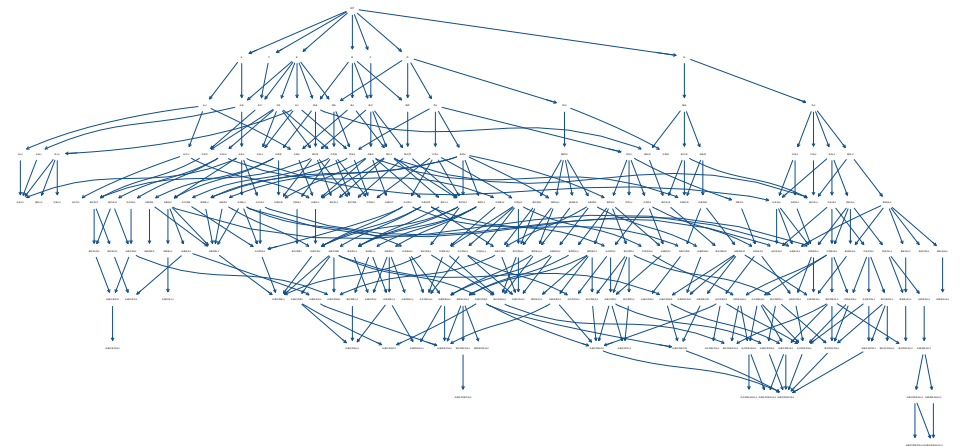

ID [g4on7kMYrN7lvT9p](#)  
 acc genotypes 106  
 peaks no back 48  
 removed edges NA  
 prop rem edges NA

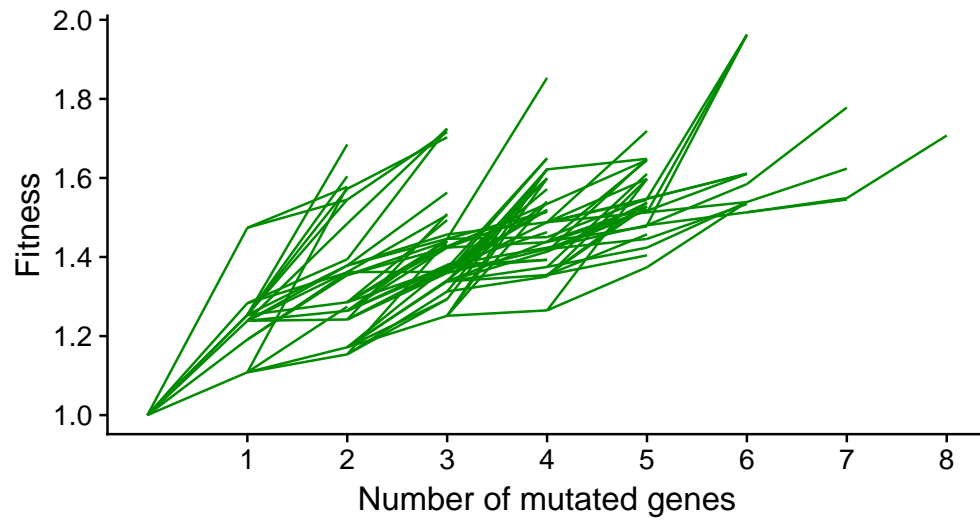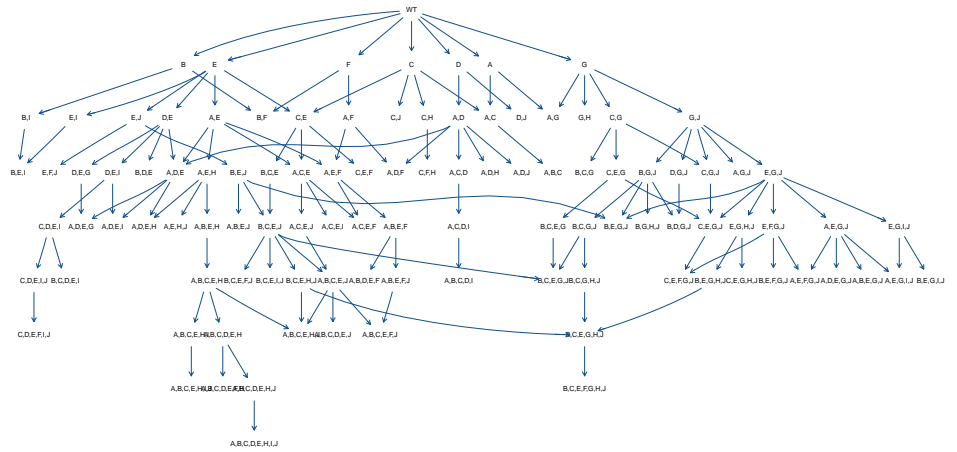

ID g5rN9RqrUiS9arMn  
 acc genotypes 39  
 peaks no back 16  
 removed edges NA  
 prop rem edges NA

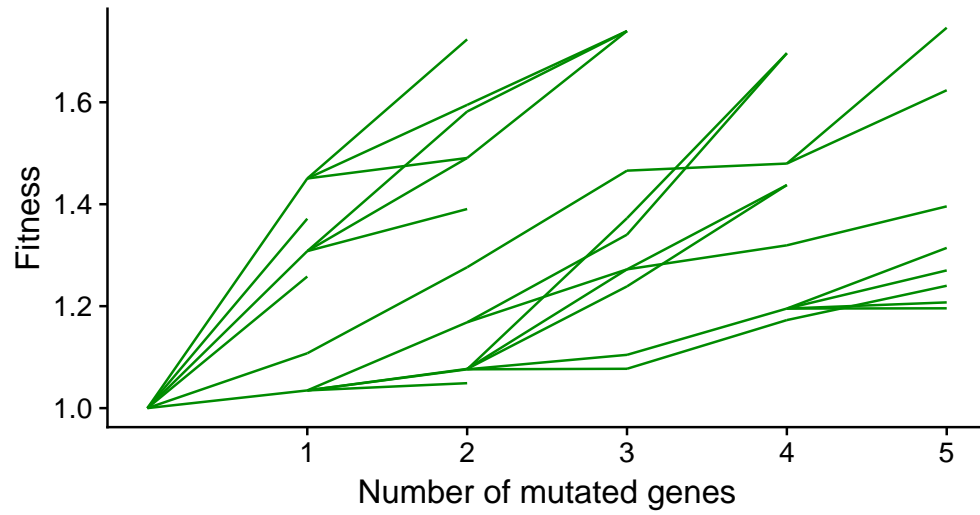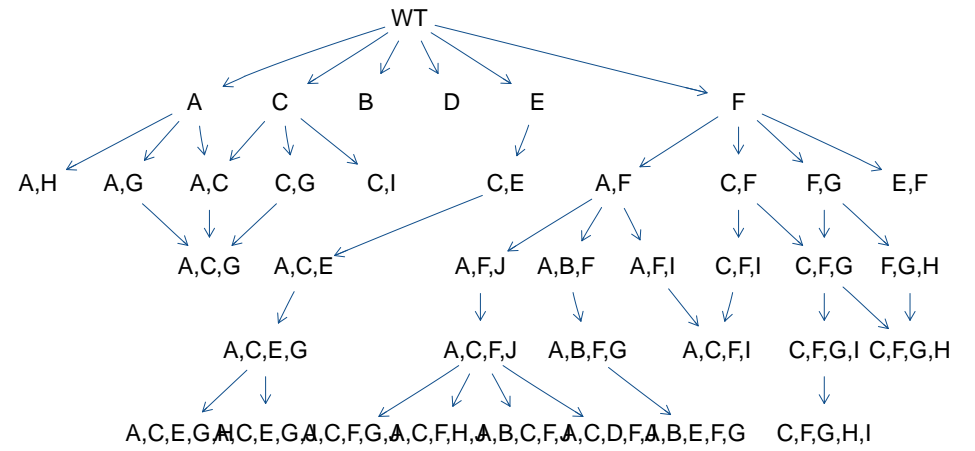

*ID* g7EPSPvUEgZmblyv  
*acc genotypes* 282  
*peaks no back* 69  
*removed edges* NA  
*prop rem edges* NA

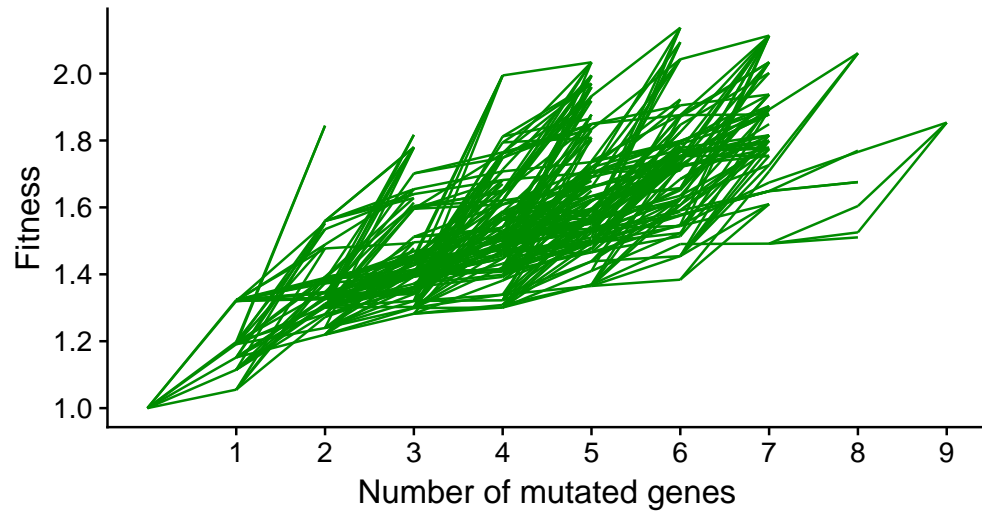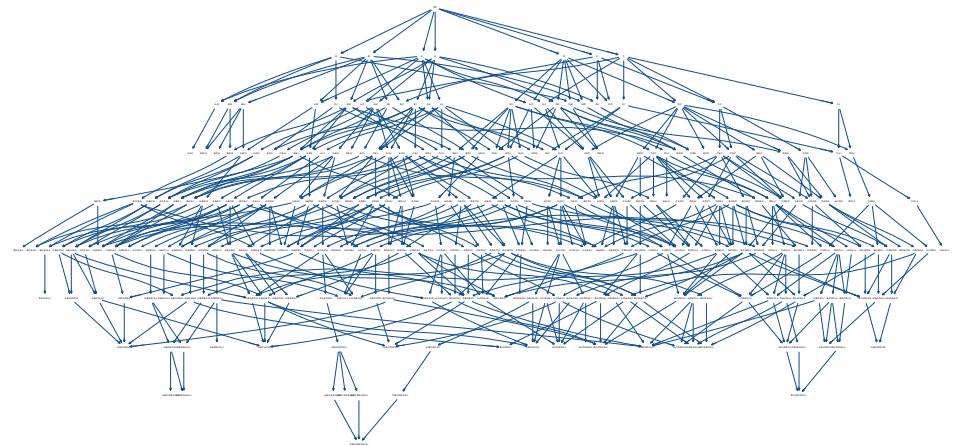

ID GDPPhLnRCnDMjG2D7  
acc genotypes 185  
peaks no back 64  
removed edges NA  
prop rem edges NA

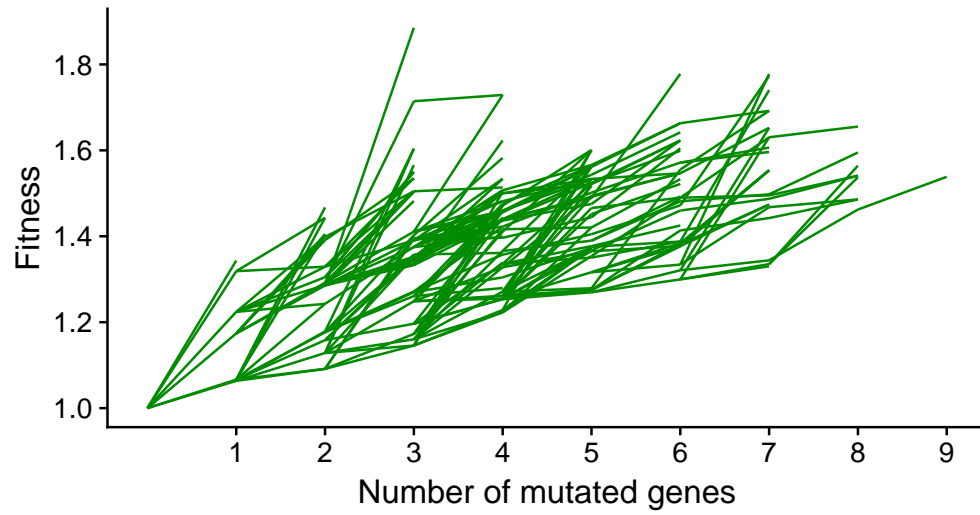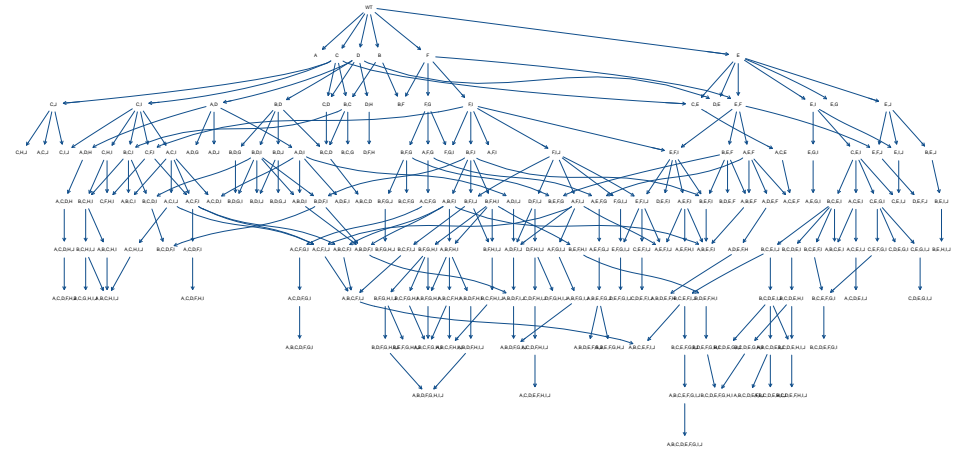

*ID* Ggye5iq3jqoH3lvU  
*acc genotypes* 314  
*peaks no back* 112  
*removed edges* NA  
*prop rem edges* NA

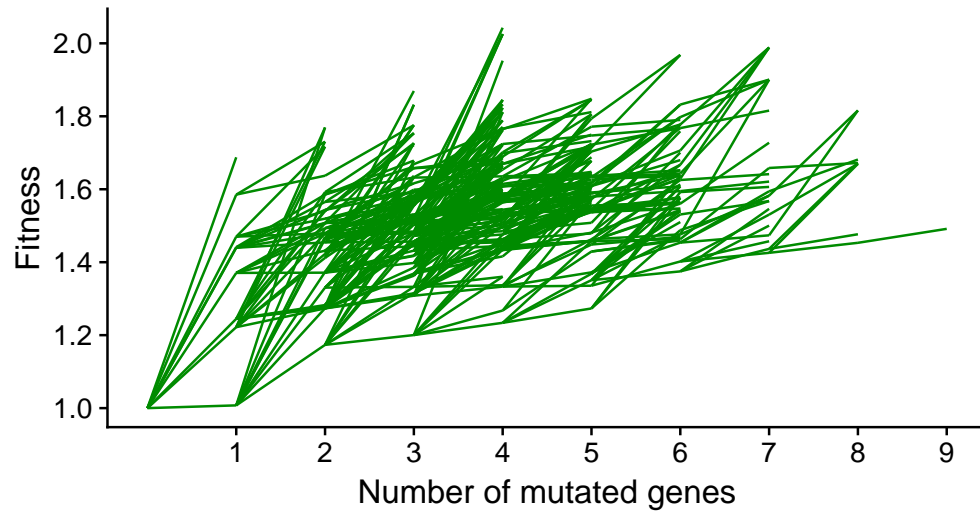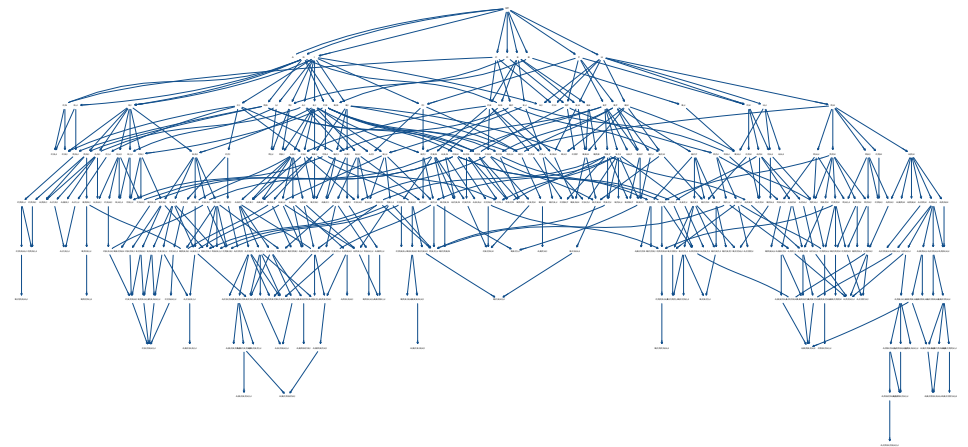

ID gQ91ynxxLJpJfC10R  
 acc genotypes 53  
 peaks no back 23  
 removed edges NA  
 prop rem edges NA

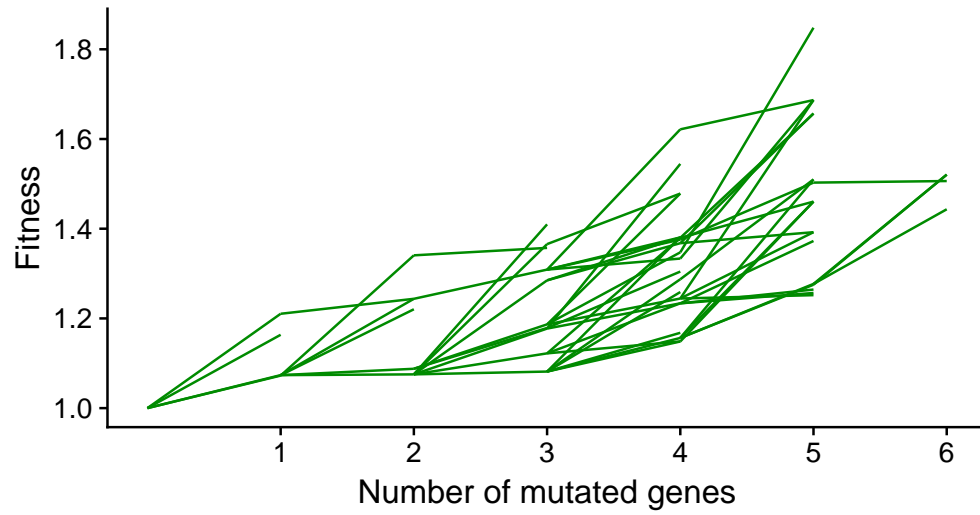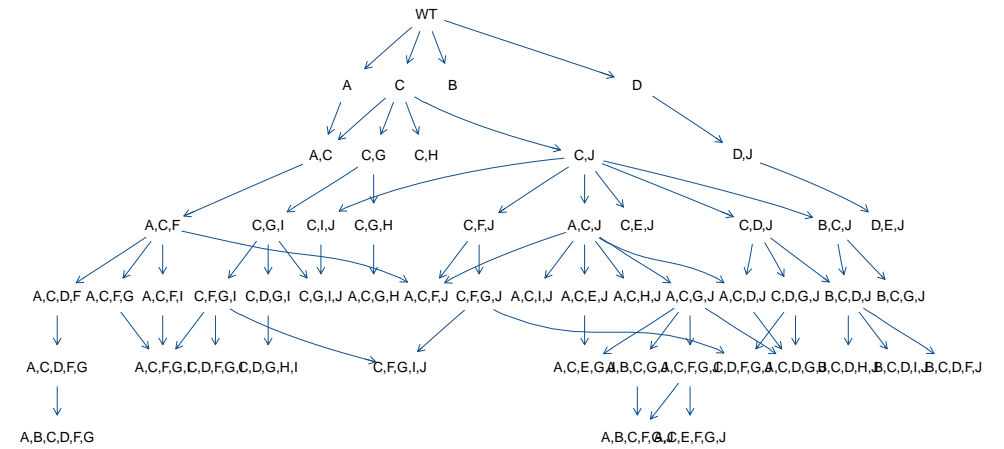

ID GtsX2ANXEuqX4ryX  
 acc genotypes 48  
 peaks no back 21  
 removed edges NA  
 prop rem edges NA

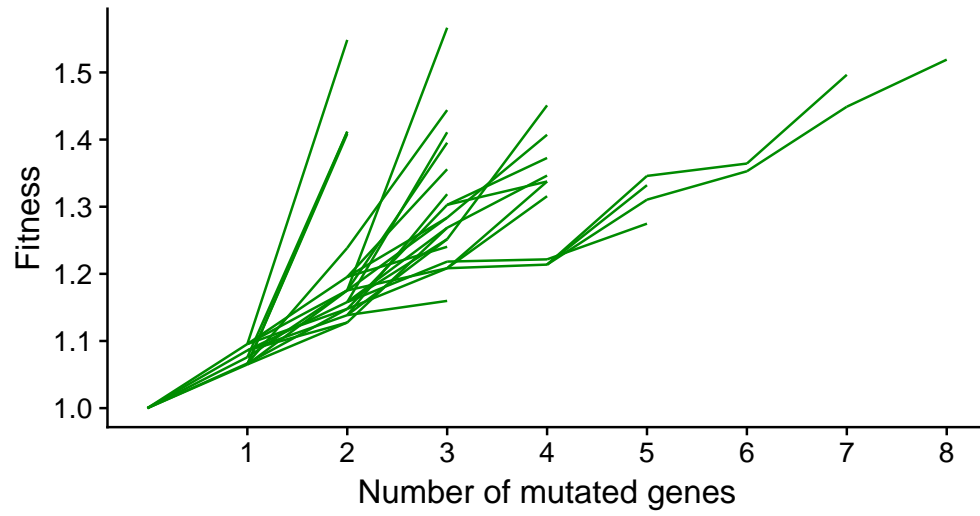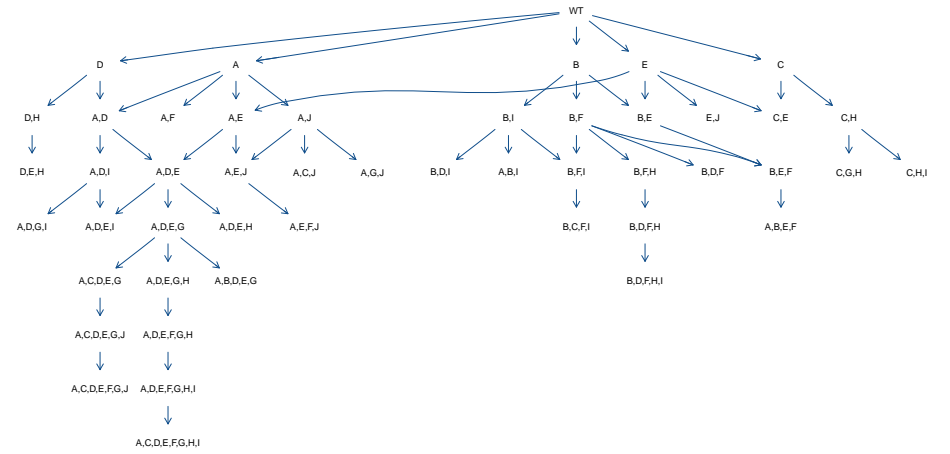



ID gU6jF3rPQlaxvDT  
acc genotypes 198  
peaks no back 76  
removed edges NA  
prop rem edges NA

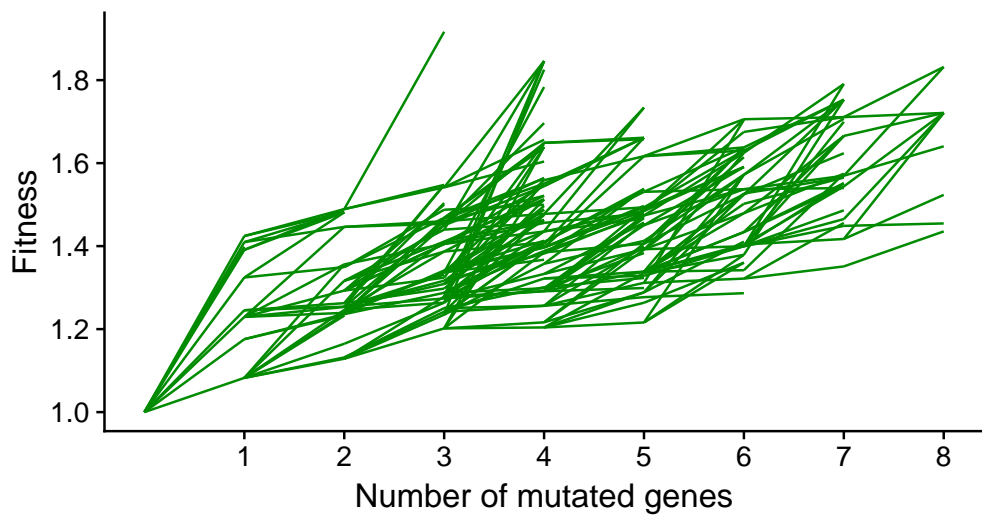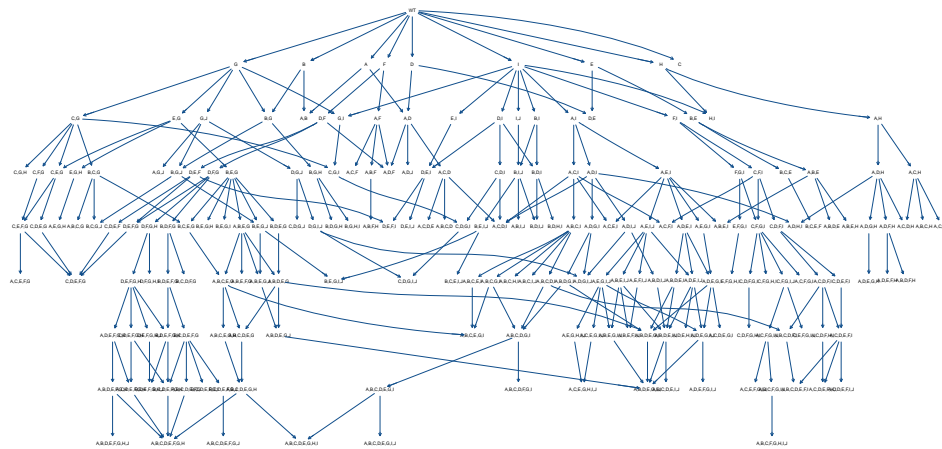

ID h10Ra4qDED5CSQYcN  
acc genotypes 472  
peaks no back 79  
removed edges NA  
prop rem edges NA

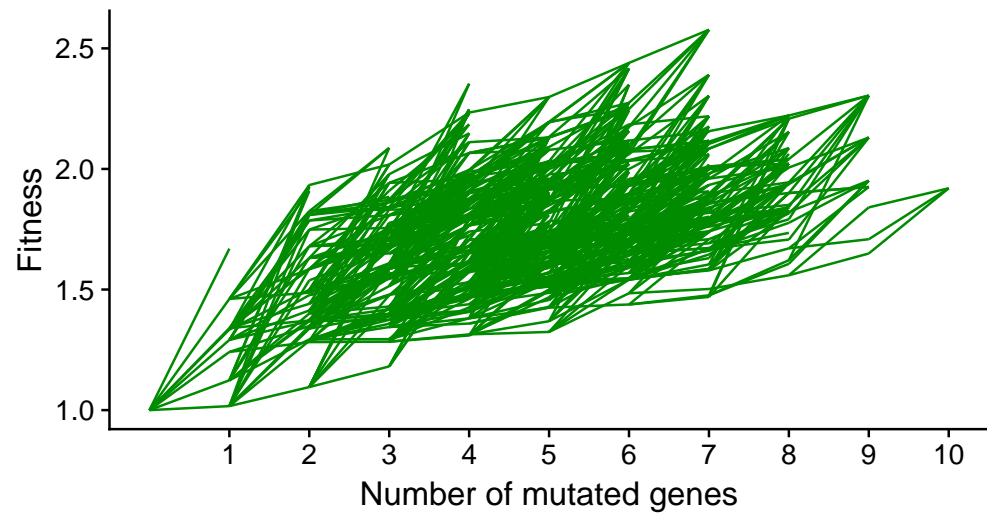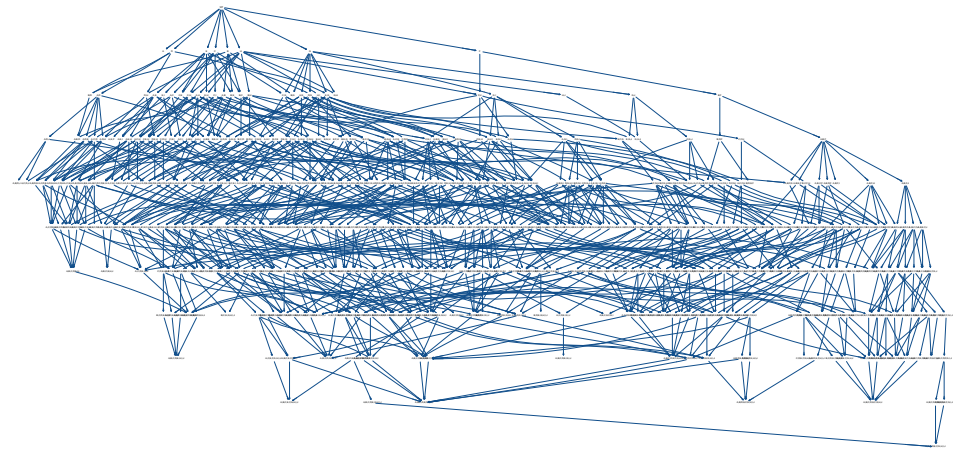

*ID* H5F3U9TPZOWztRjG  
*acc genotypes* 501  
*peaks no back* 101  
*removed edges* NA  
*prop rem edges* NA

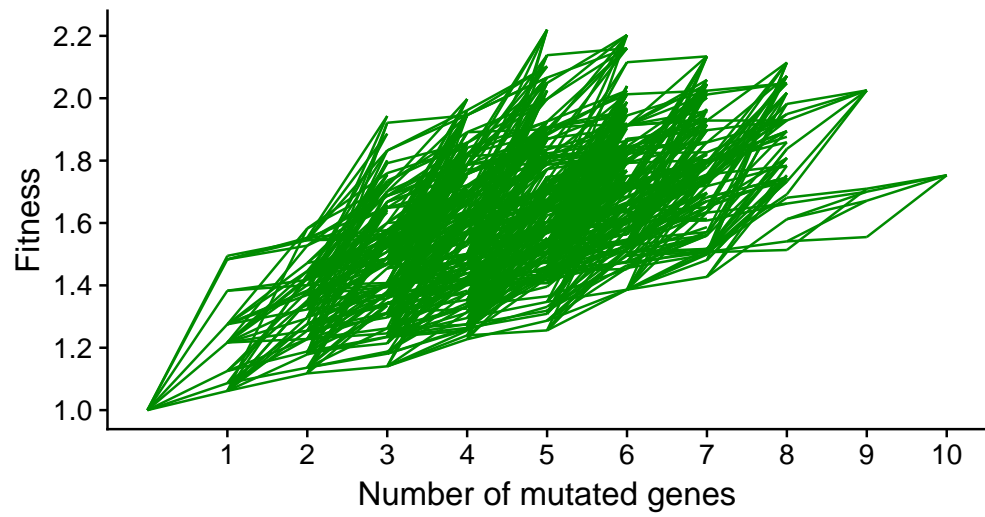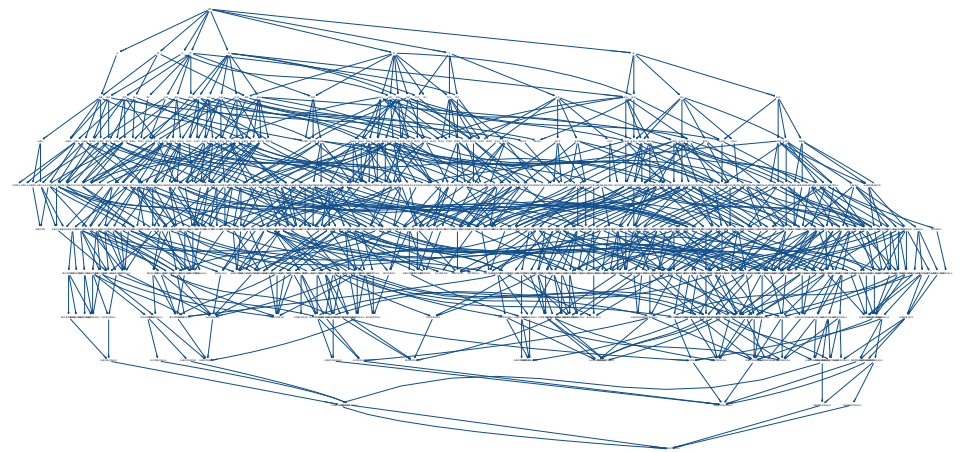

*ID* HdswhOaHWIP1kOLZ  
*acc genotypes* 389  
*peaks no back* 95  
*removed edges* NA  
*prop rem edges* NA

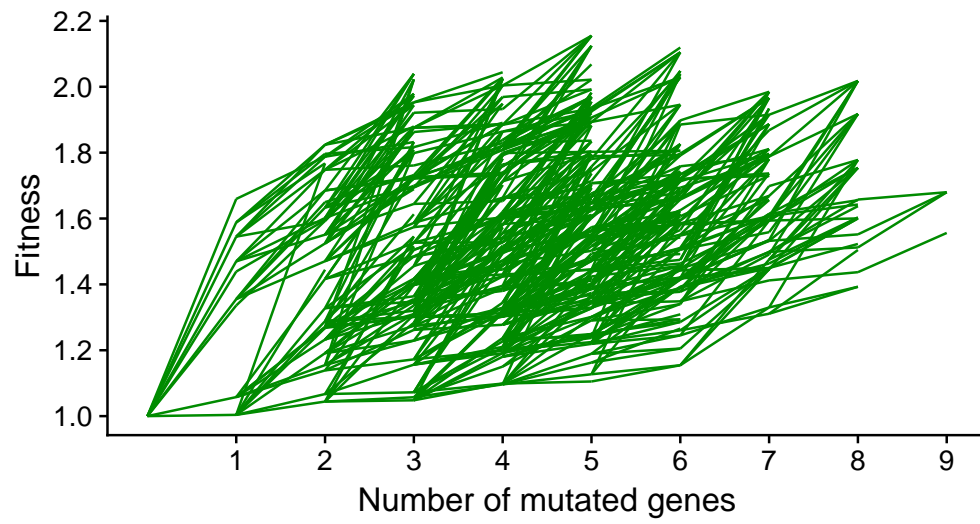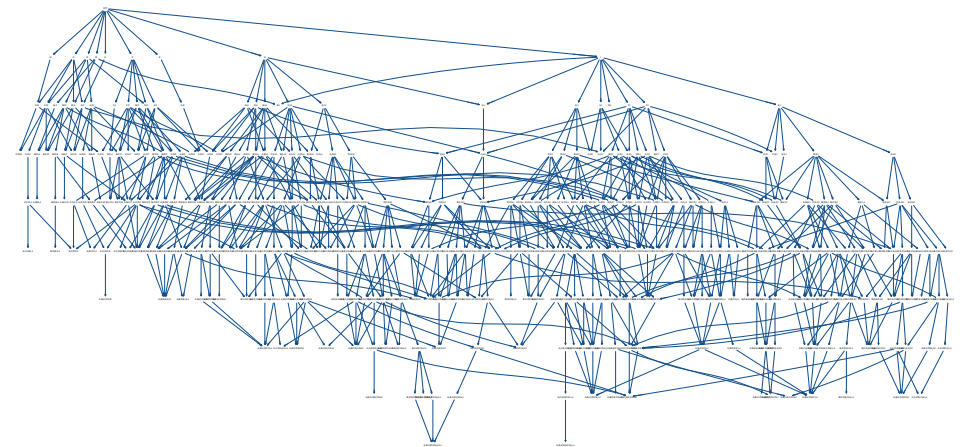

ID [helHa8Gt8XkXkA6v](#)  
 acc genotypes 19  
 peaks no back 8  
 removed edges NA  
 prop rem edges NA

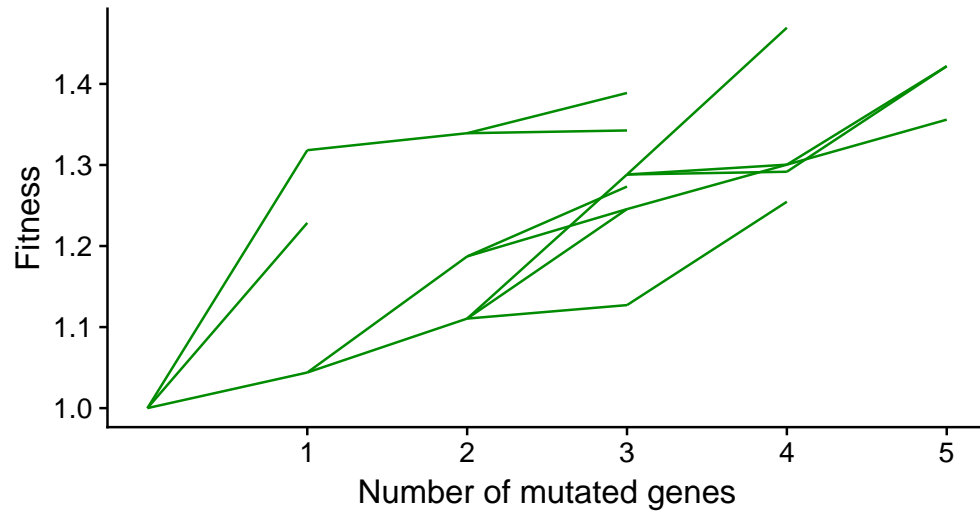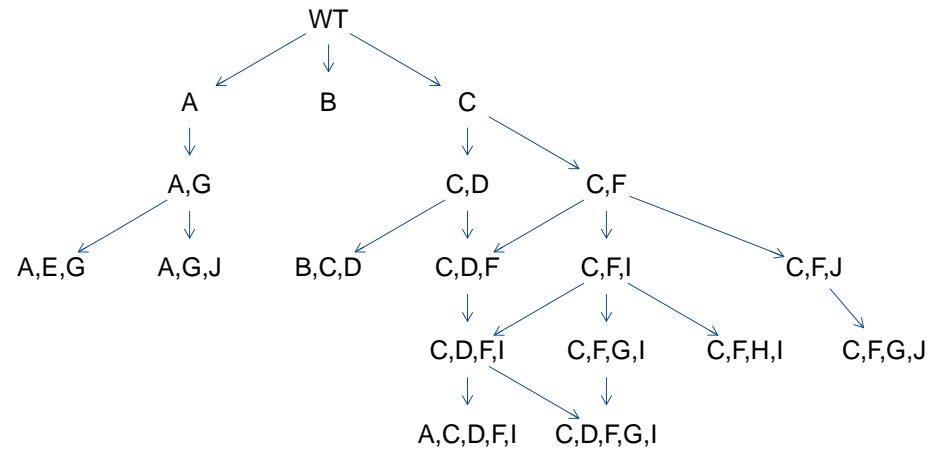

*ID* hm10KP8sr2CYeQUji  
*acc genotypes* 309  
*peaks no back* 107  
*removed edges* NA  
*prop rem edges* NA

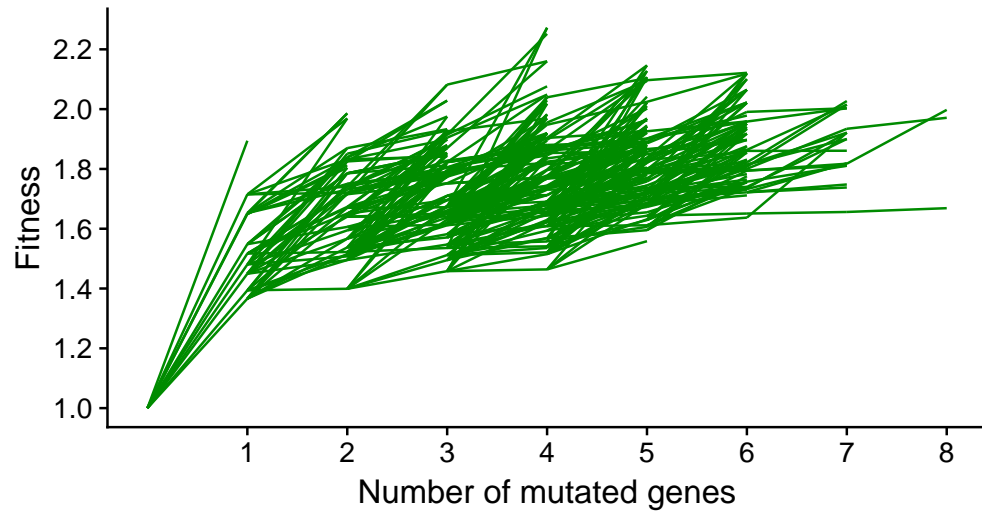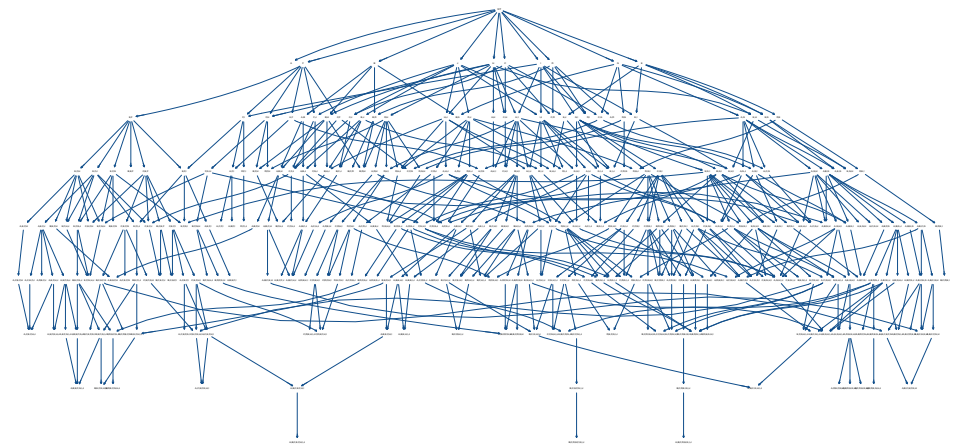

*ID* hQhSt6SyCYjTd10y8  
*acc genotypes* 593  
*peaks no back* 84  
*removed edges* NA  
*prop rem edges* NA

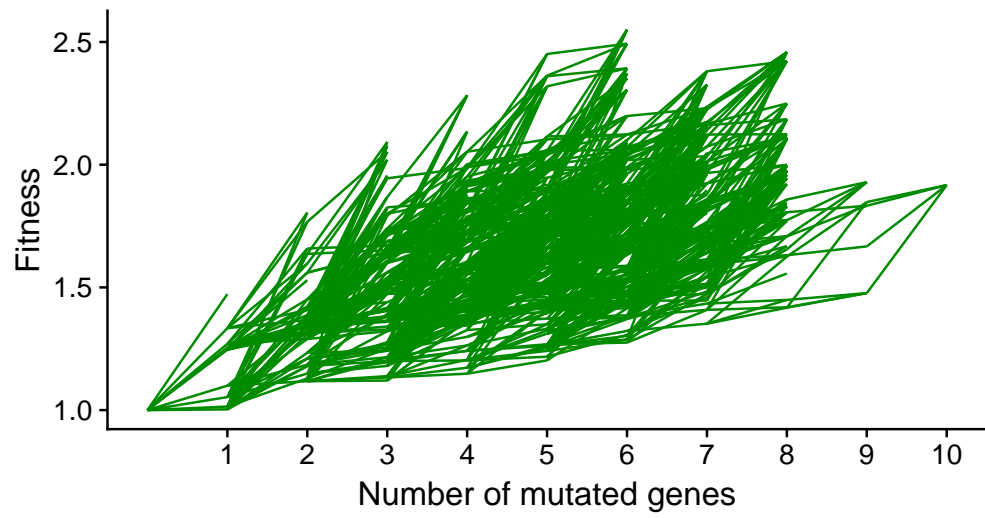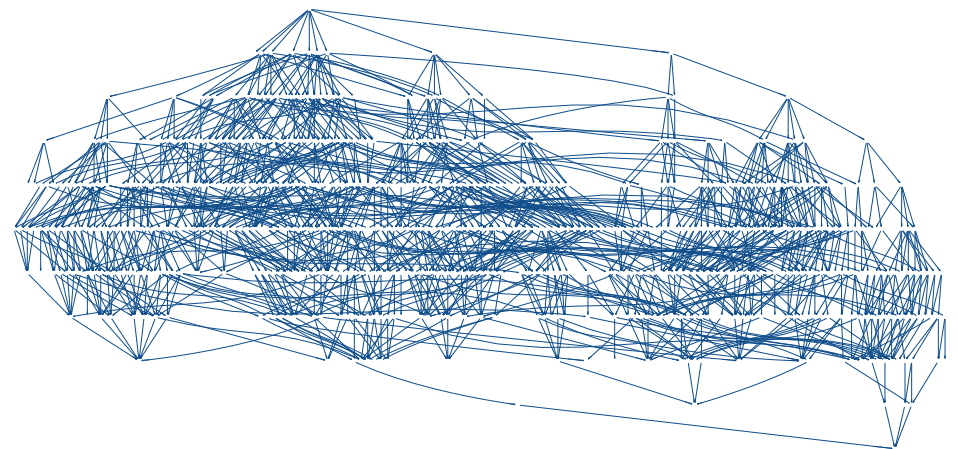

ID hrKHhSGSCA4NDMJJP  
acc genotypes 157  
peaks no back 43  
removed edges NA  
prop rem edges NA

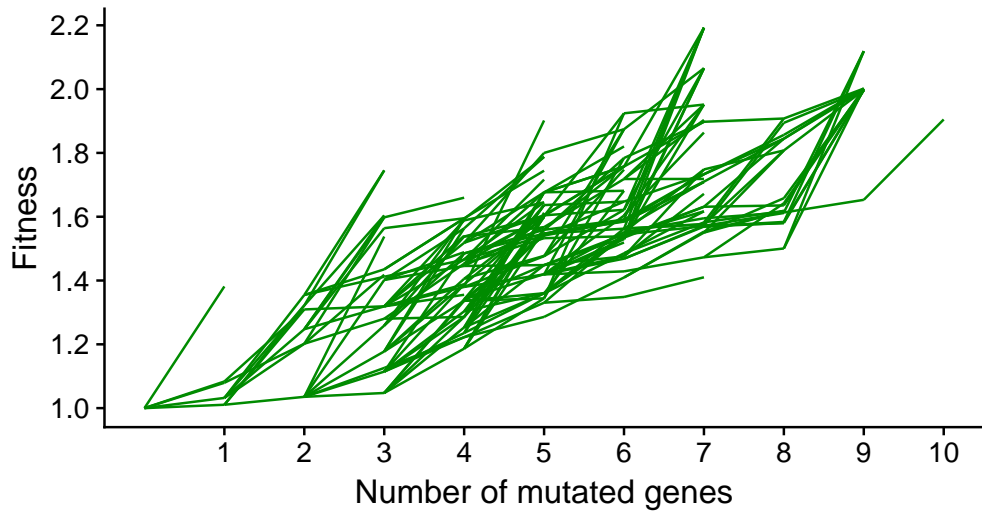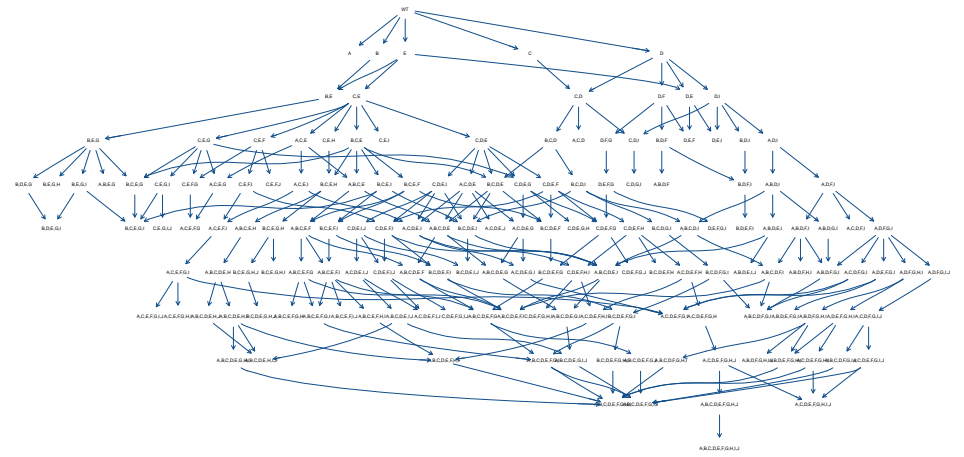



*ID* I9q6GI3hisYql2on  
*acc genotypes* 298  
*peaks no back* 79  
*removed edges* NA  
*prop rem edges* NA

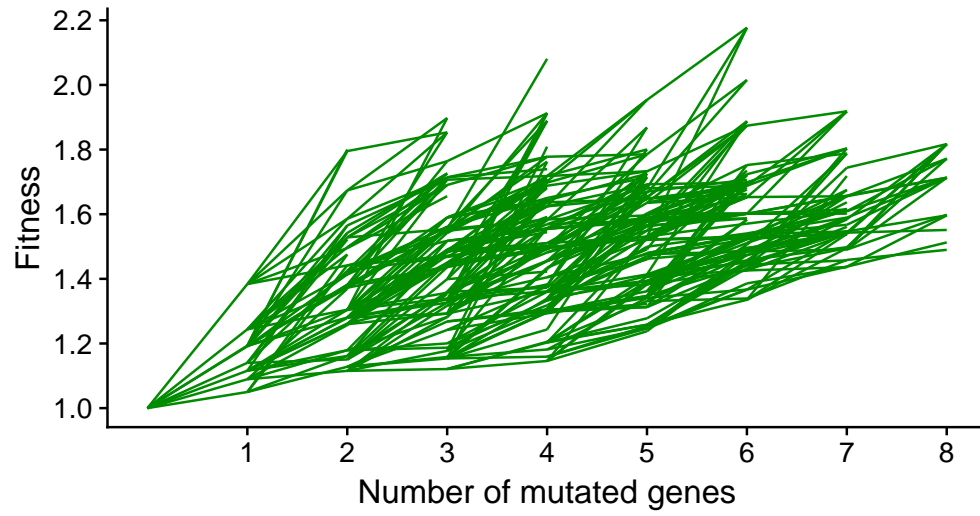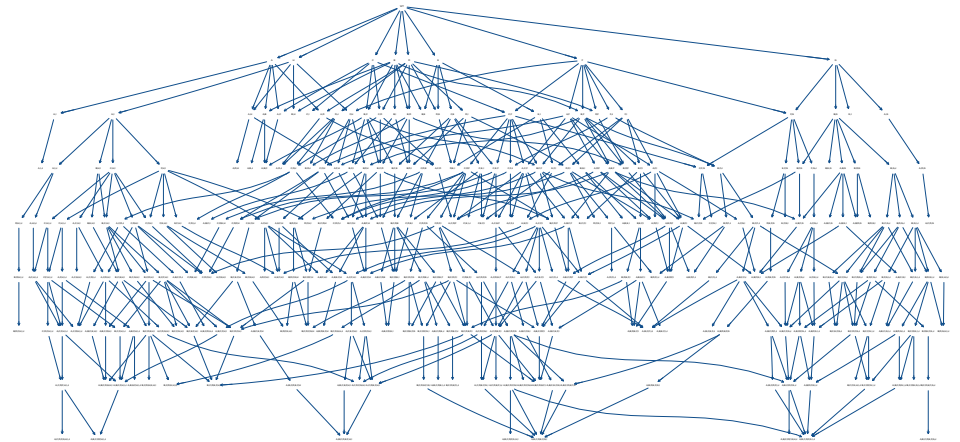

ID [ikuJV711Pr9P5gMR](#)  
 acc genotypes 54  
 peaks no back 25  
 removed edges NA  
 prop rem edges NA

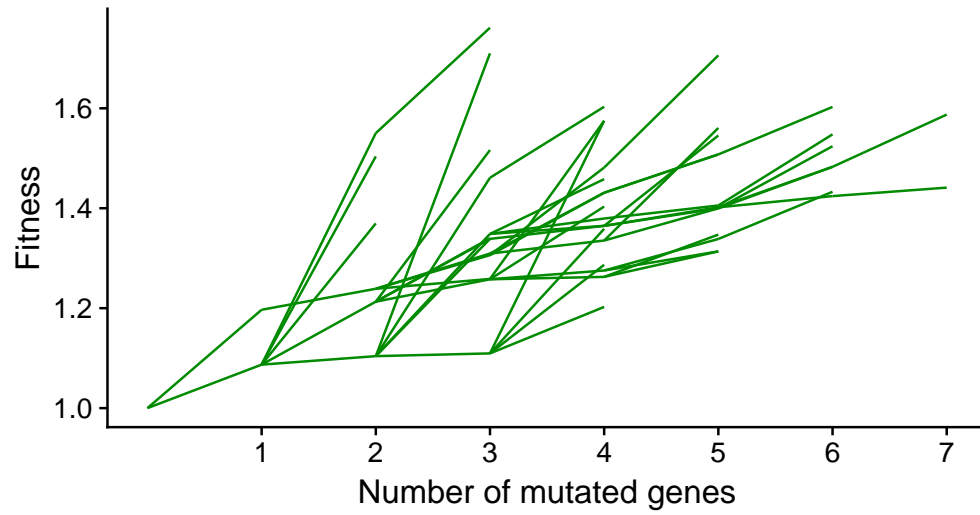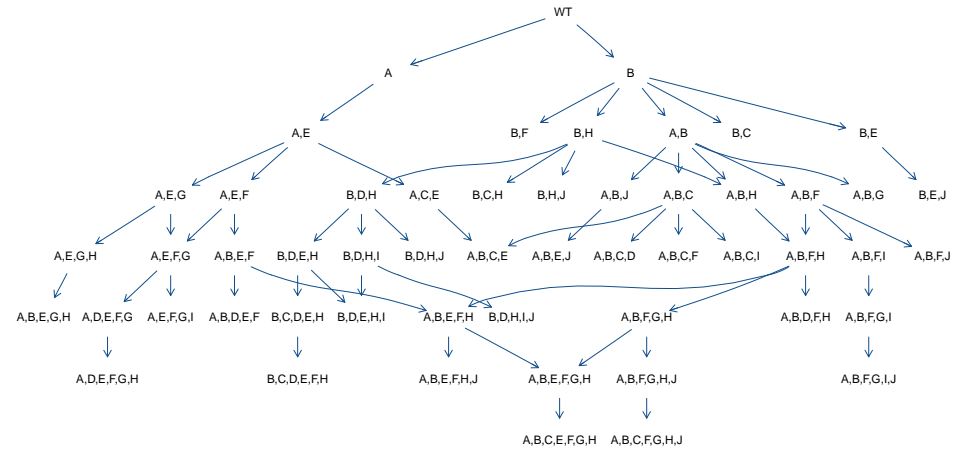

ID [irlmocl1nEJmK32](#)  
 acc genotypes 95  
 peaks no back 46  
 removed edges NA  
 prop rem edges NA

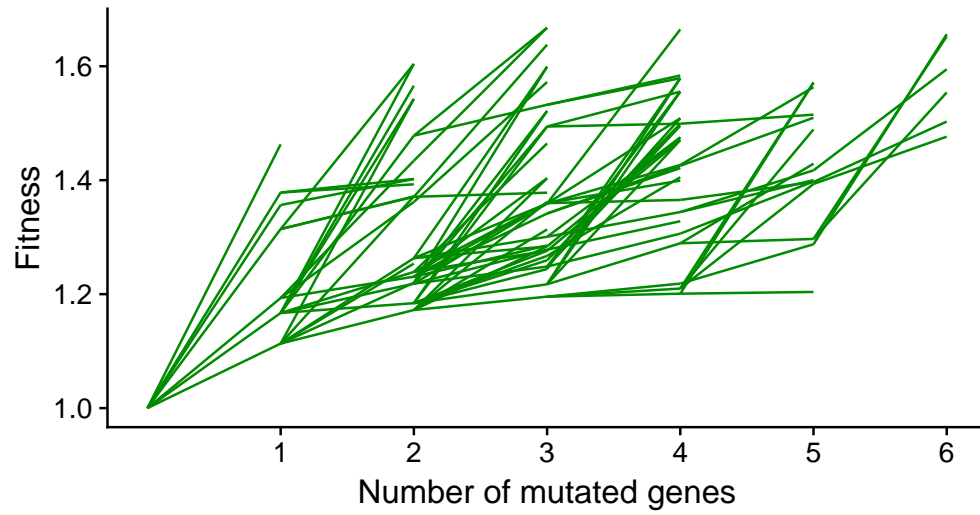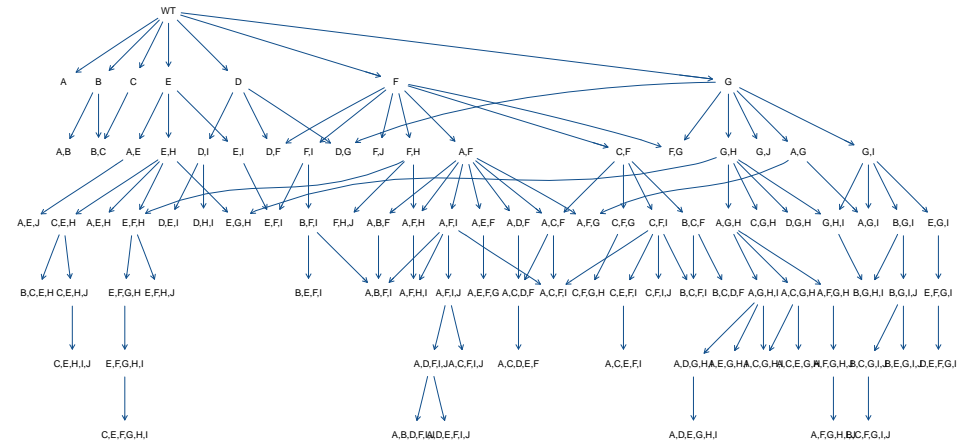

ID [itu7sgxZ42Rqmbw](#)  
acc genotypes 140  
peaks no back 36  
removed edges NA  
prop rem edges NA

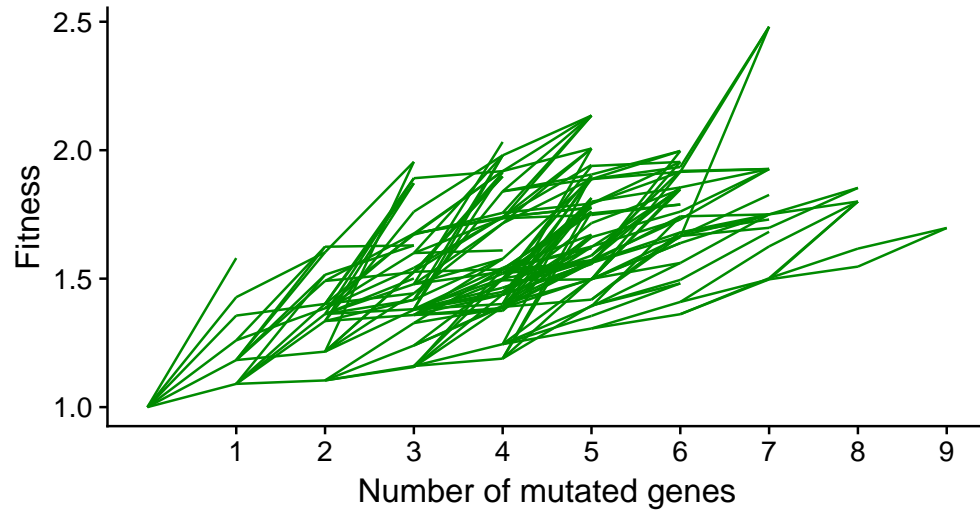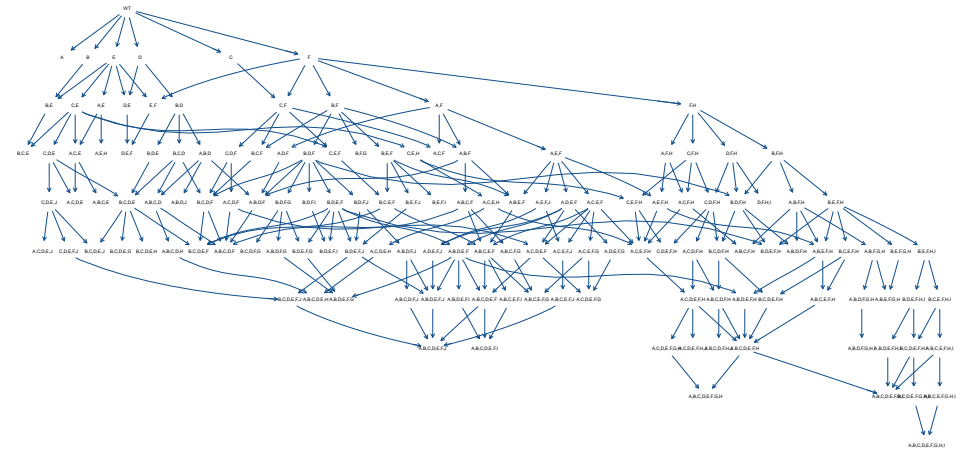

ID IxTaa10yvF9m8psni  
acc genotypes 188  
peaks no back 61  
removed edges NA  
prop rem edges NA

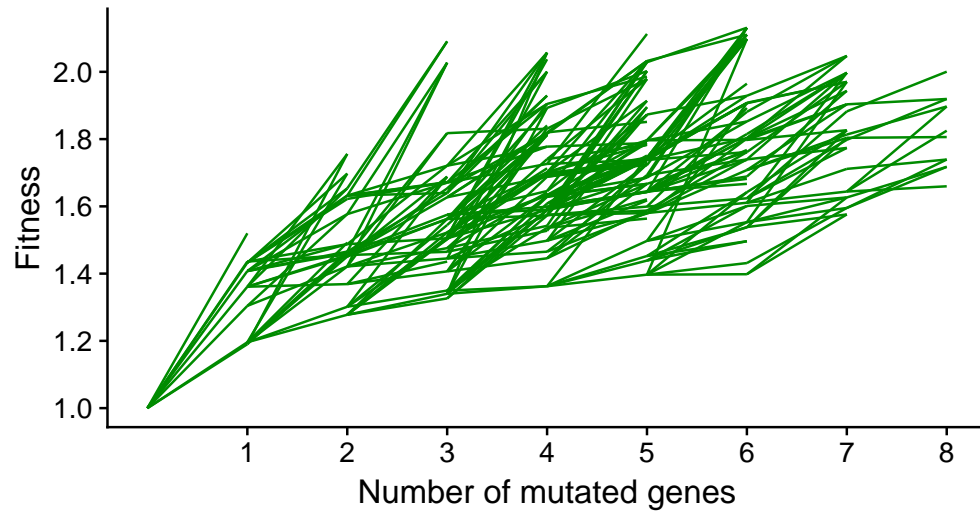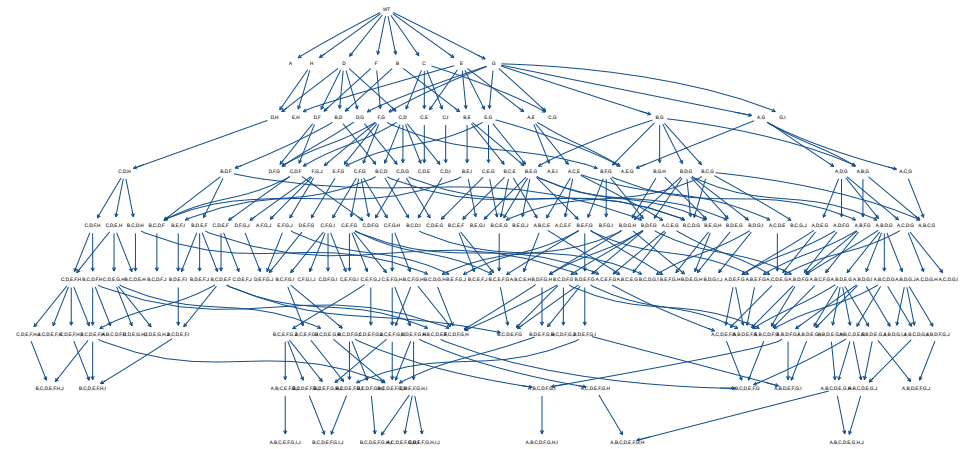

ID j5Wlsy8xtbP8JPCd  
acc genotypes 115  
peaks no back 54  
removed edges NA  
prop rem edges NA

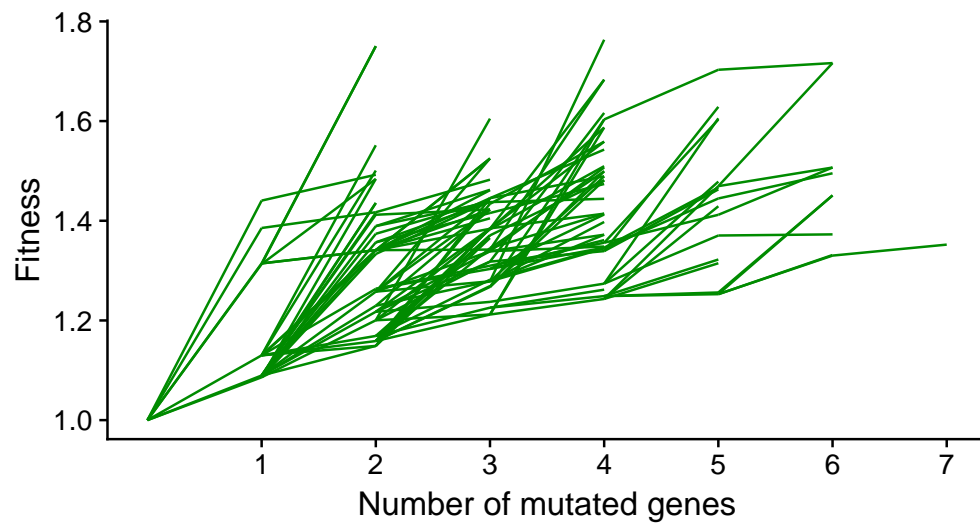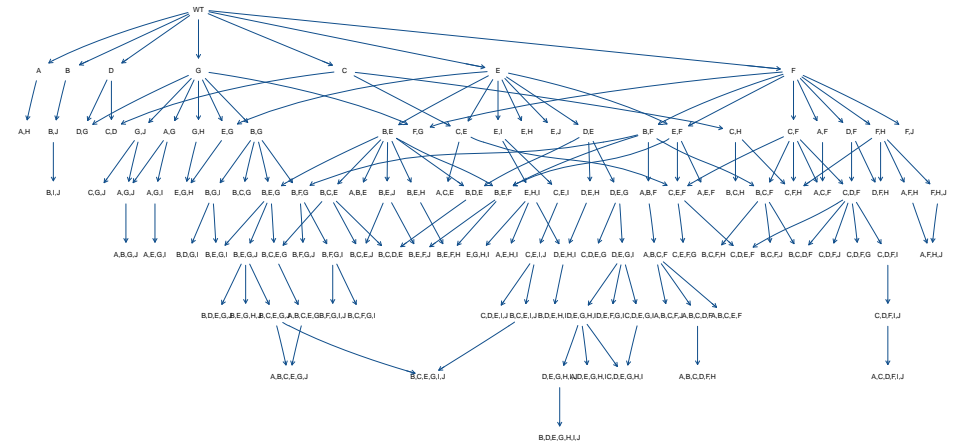

ID J6cFc1nMWhianSvF  
acc genotypes 189  
peaks no back 73  
removed edges NA  
prop rem edges NA

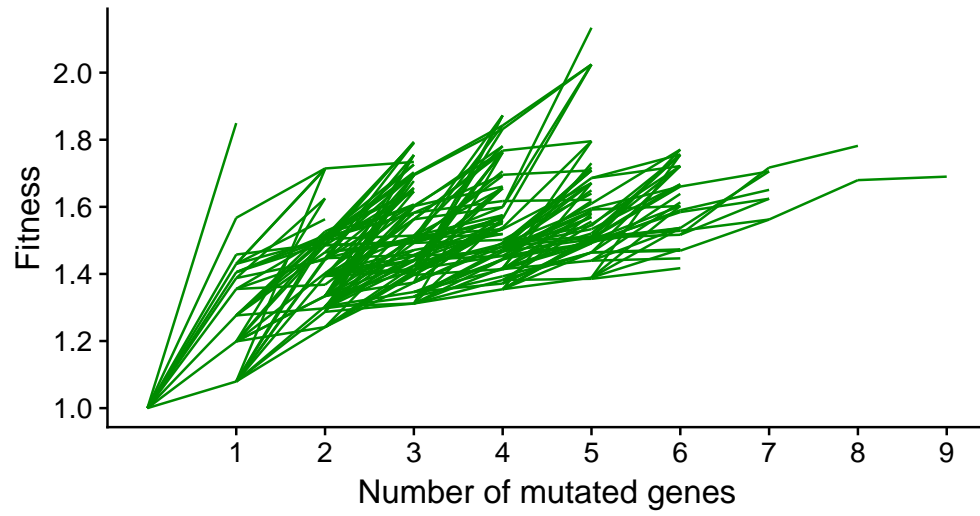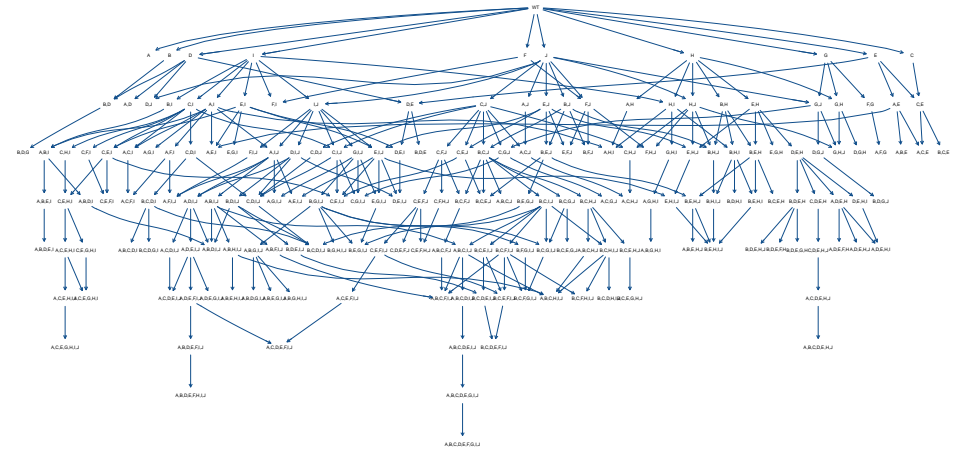

*ID* jANbFMNMm7HJ8B10  
*acc genotypes* 735  
*peaks no back* 93  
*removed edges* NA  
*prop rem edges* NA

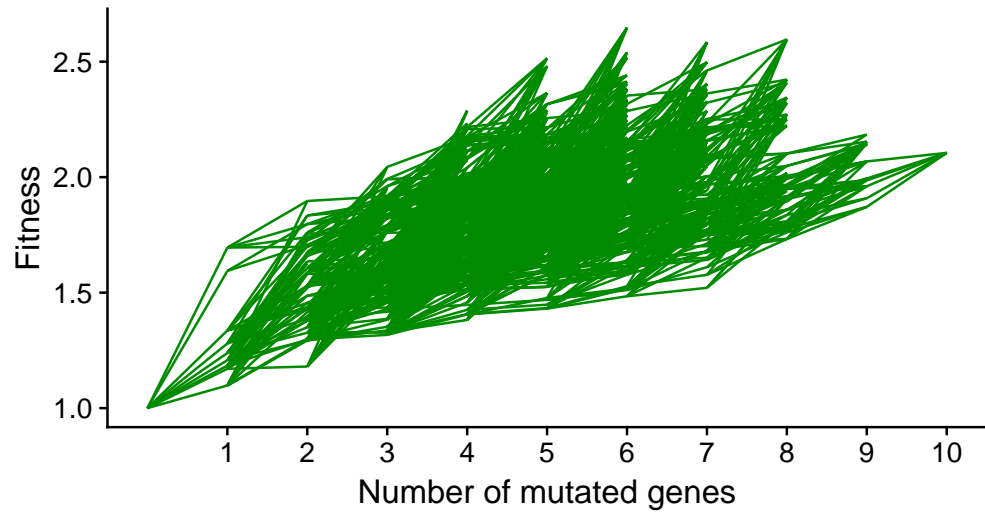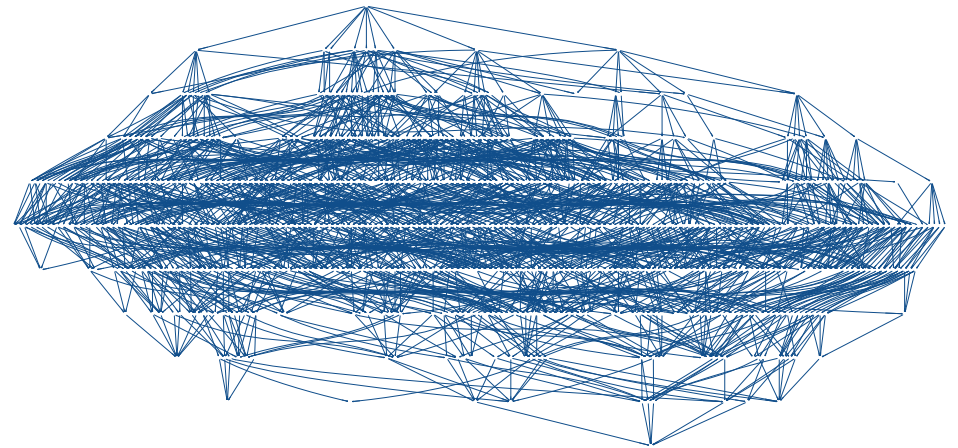



ID [jQBPzk8ZII14NJWW](#)  
 acc genotypes 88  
 peaks no back 31  
 removed edges NA  
 prop rem edges NA

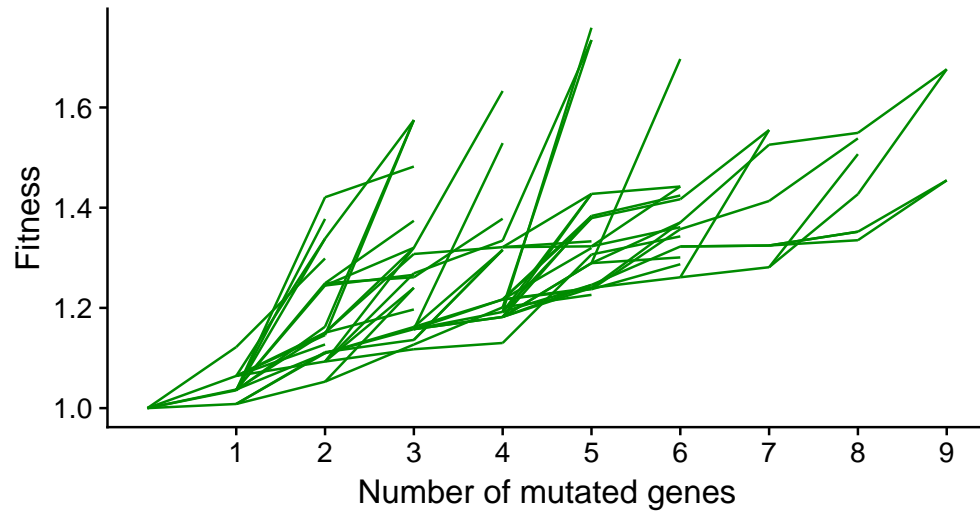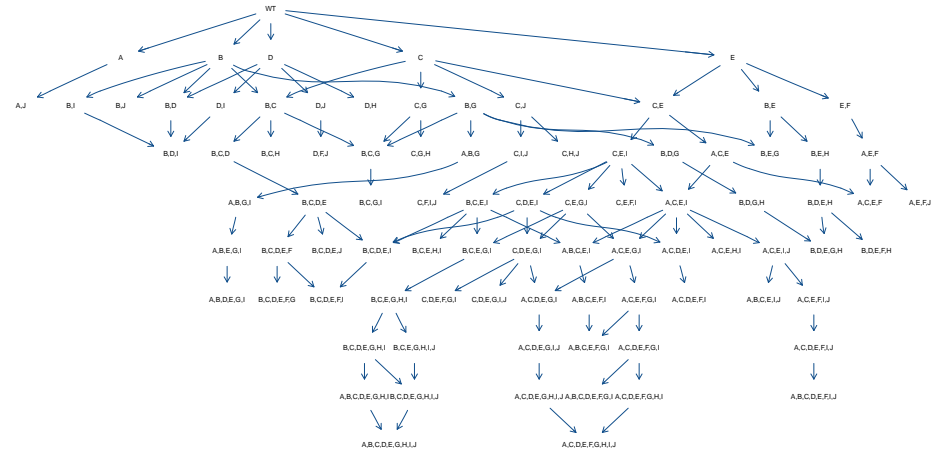

ID K4fDyrolukDwi9Ma  
acc genotypes 145  
peaks no back 53  
removed edges NA  
prop rem edges NA

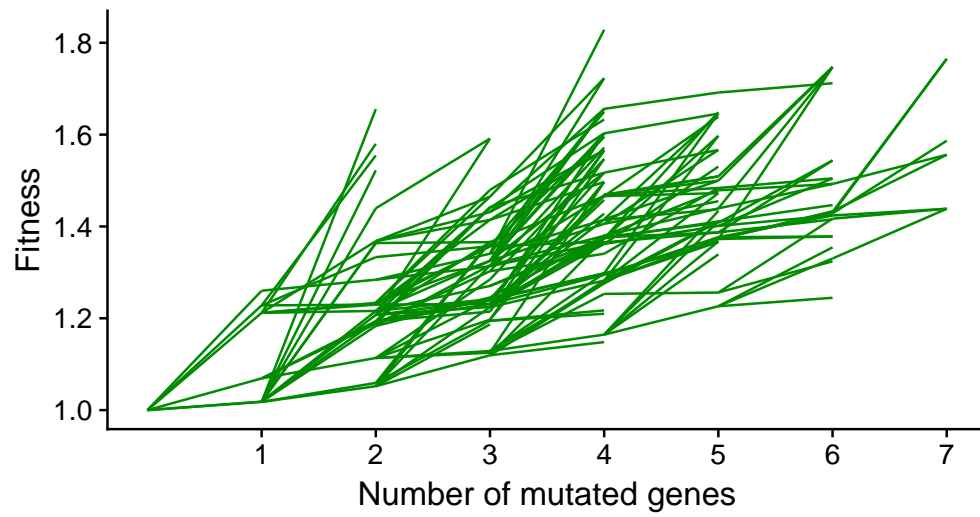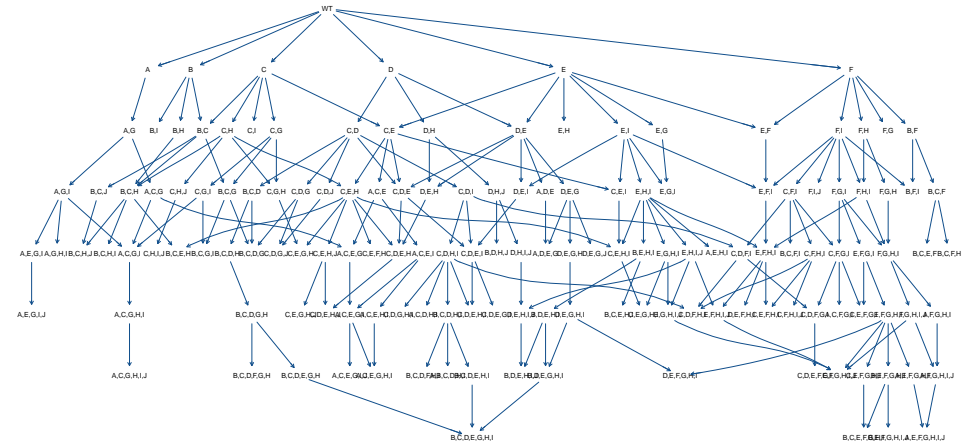

ID k4Otpn3TVpfZN7m  
acc genotypes 166  
peaks no back 64  
removed edges NA  
prop rem edges NA

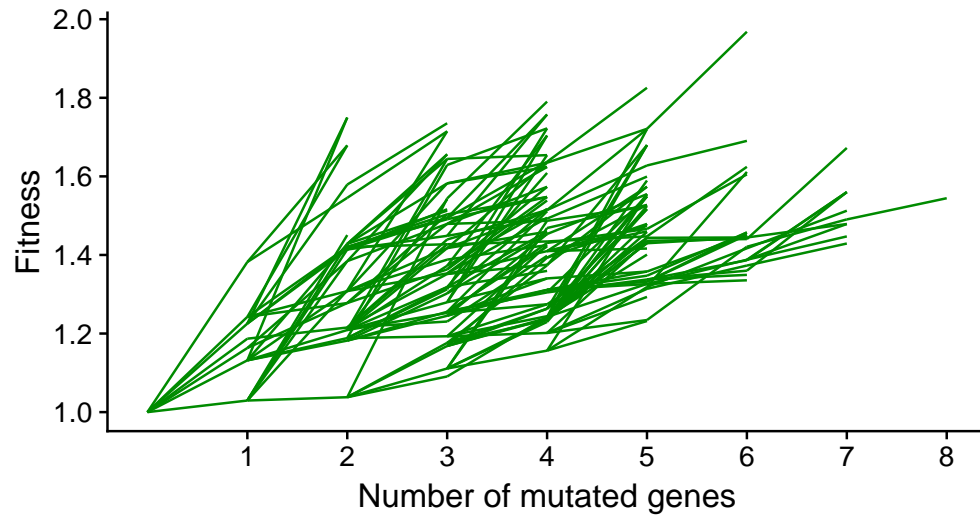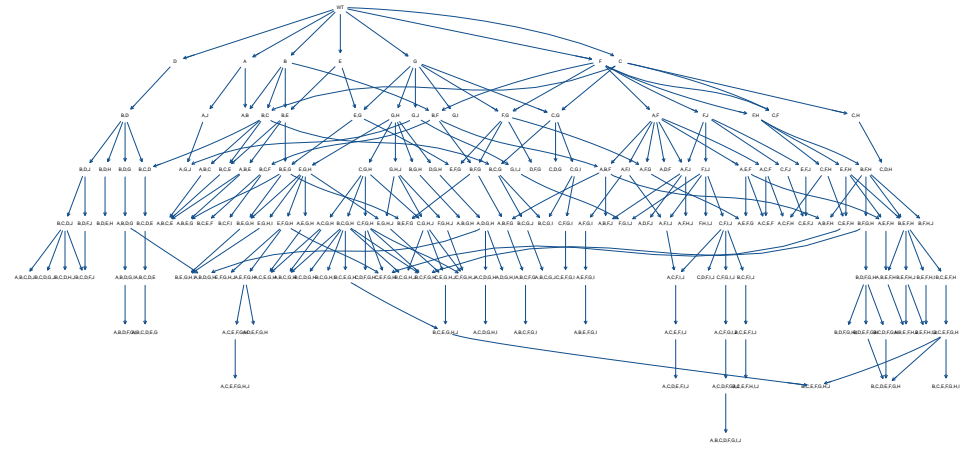

ID [k9EeYCy4KVgVd19l](#)  
 acc genotypes 82  
 peaks no back 35  
 removed edges NA  
 prop rem edges NA

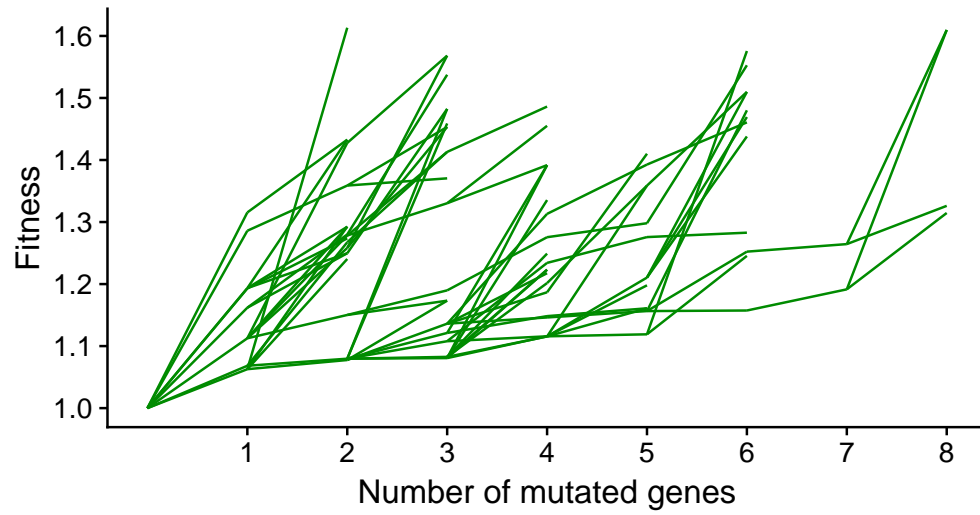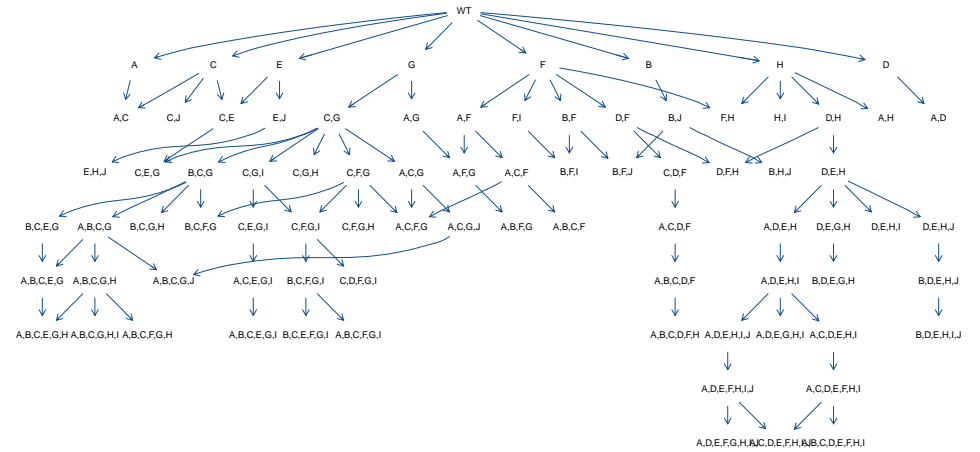

ID KB10V10fR8eSnvo1Wn  
acc genotypes 255  
peaks no back 59  
removed edges NA  
prop rem edges NA

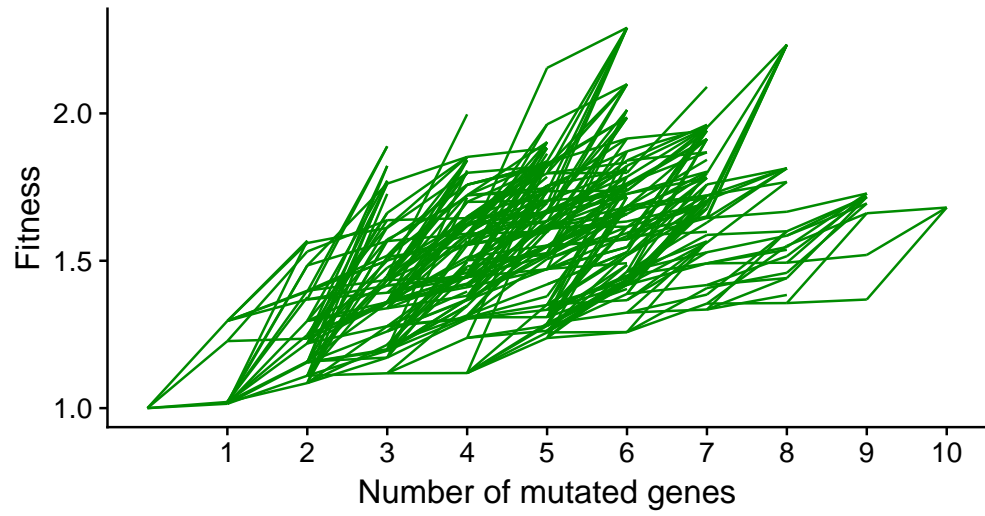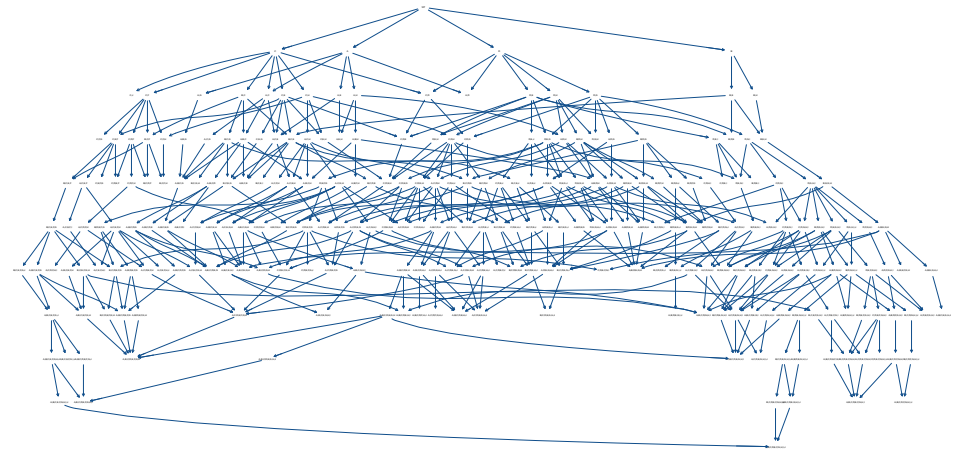

*ID* kEEjEwfuinUR9Smg  
*acc genotypes* 707  
*peaks no back* 92  
*removed edges* NA  
*prop rem edges* NA

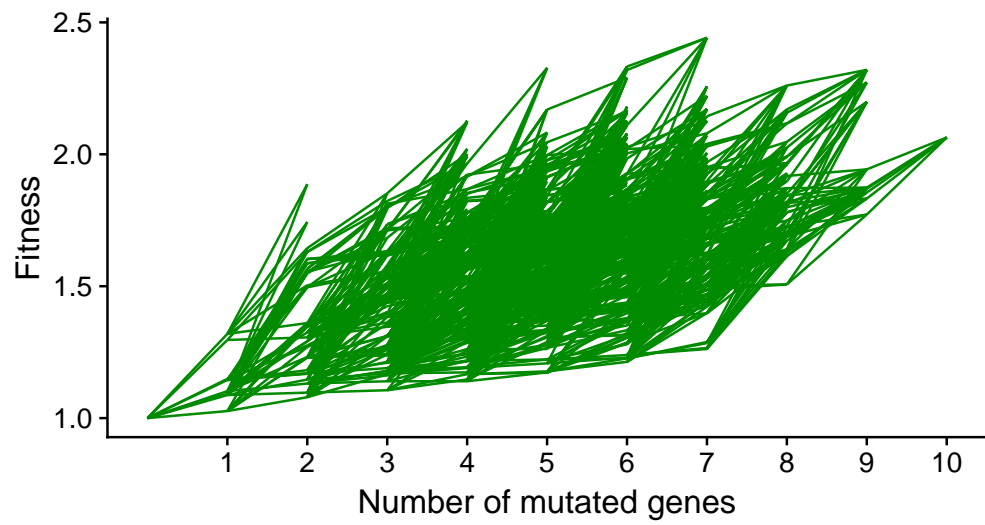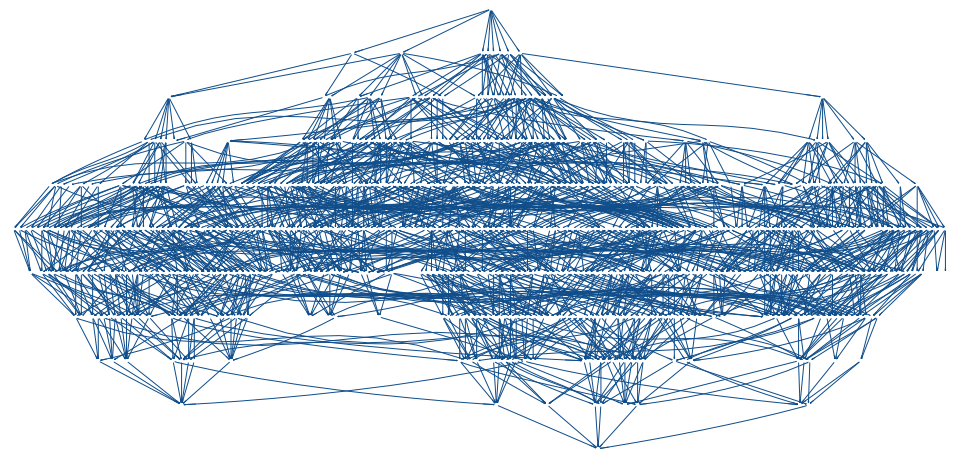

ID kfHfKfTcY9lyTX3  
acc genotypes 207  
peaks no back 79  
removed edges NA  
prop rem edges NA

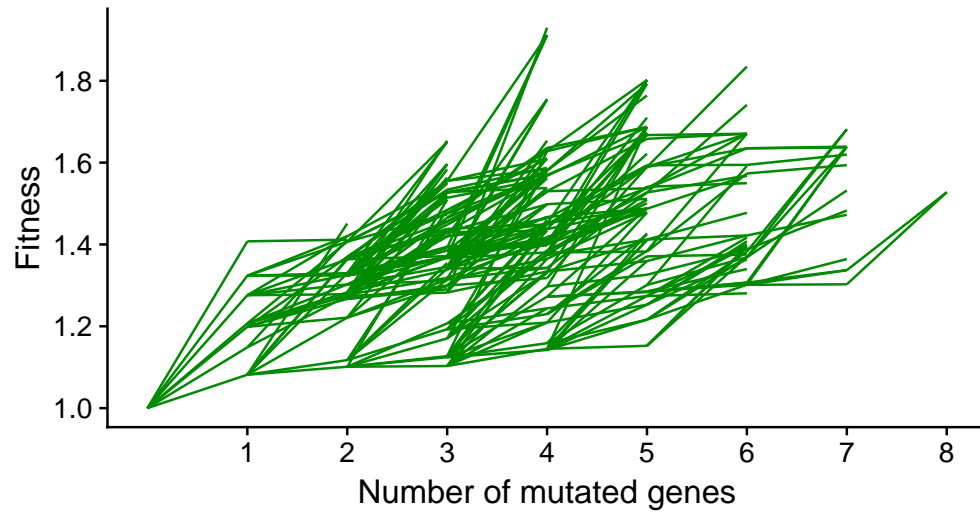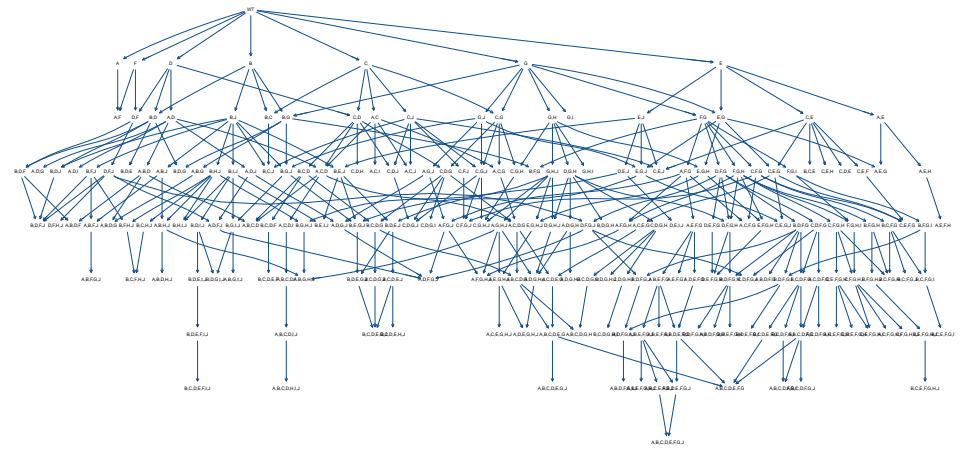

ID [KJpT1Yp64Tw10qzk10](#)  
 acc genotypes 35  
 peaks no back 16  
 removed edges NA  
 prop rem edges NA

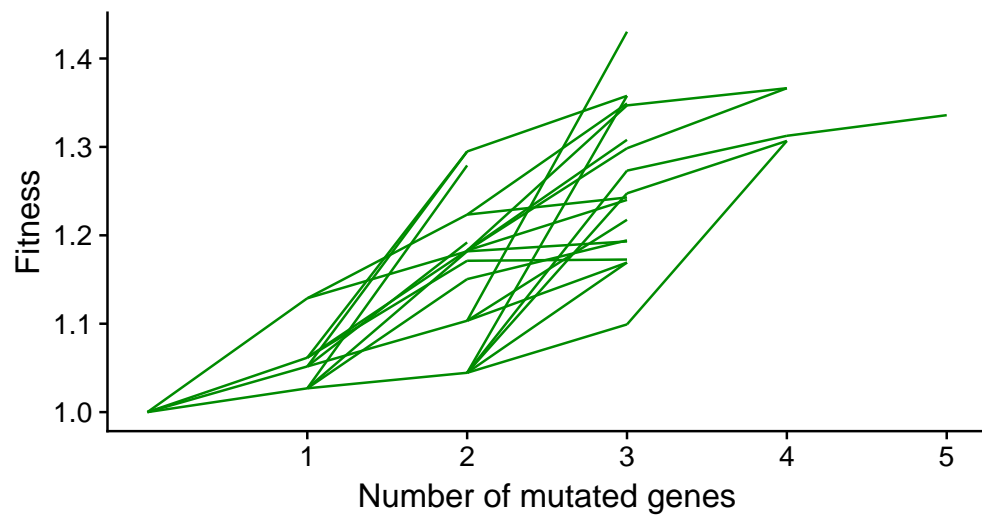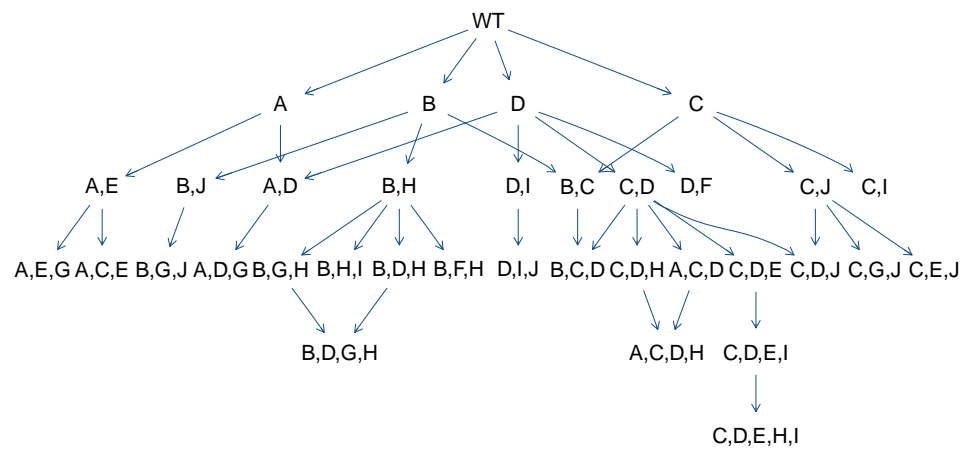



ID KVDBUlaSExVhtPy5  
acc genotypes 187  
peaks no back 57  
removed edges NA  
prop rem edges NA

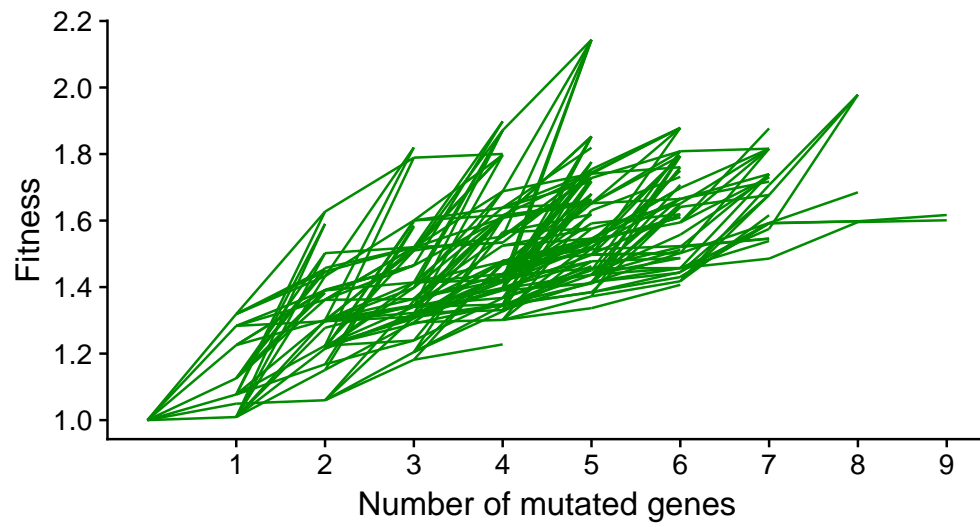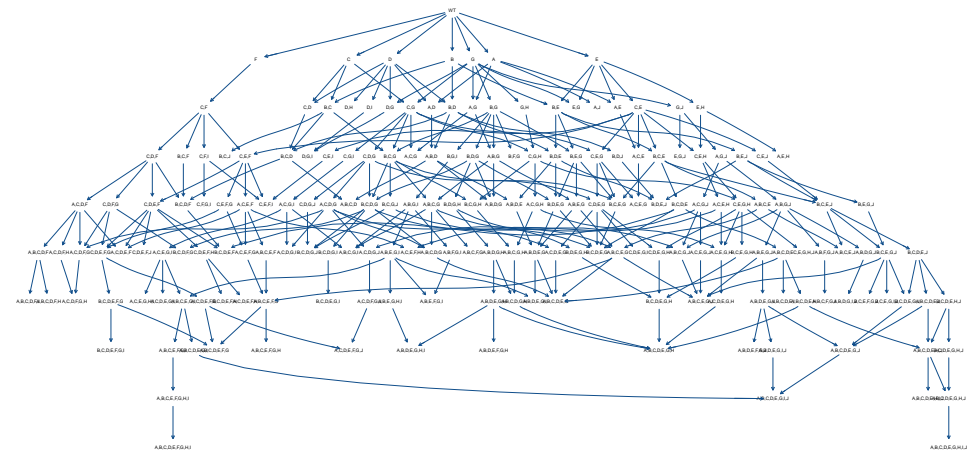

*ID* 110y29Tq5MlxxOTsw  
*acc genotypes* 465  
*peaks no back* 98  
*removed edges* NA  
*prop rem edges* NA

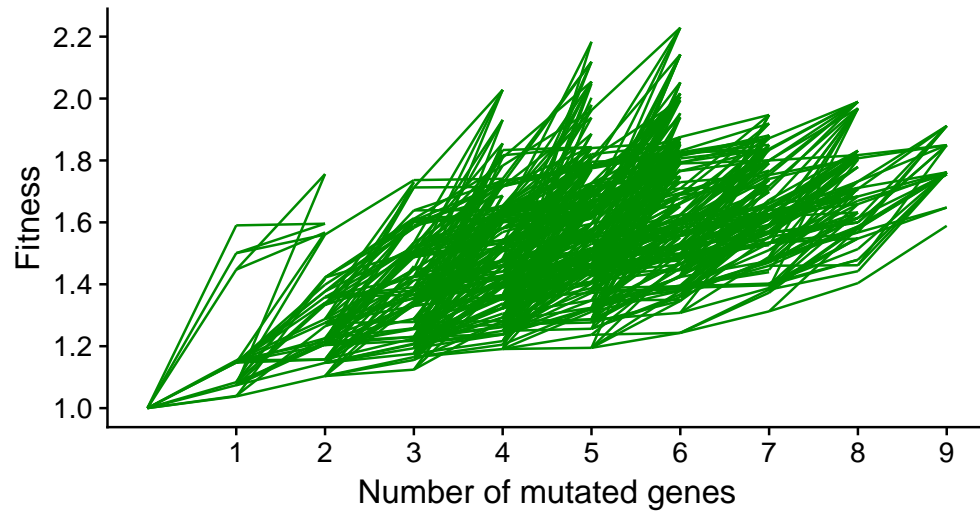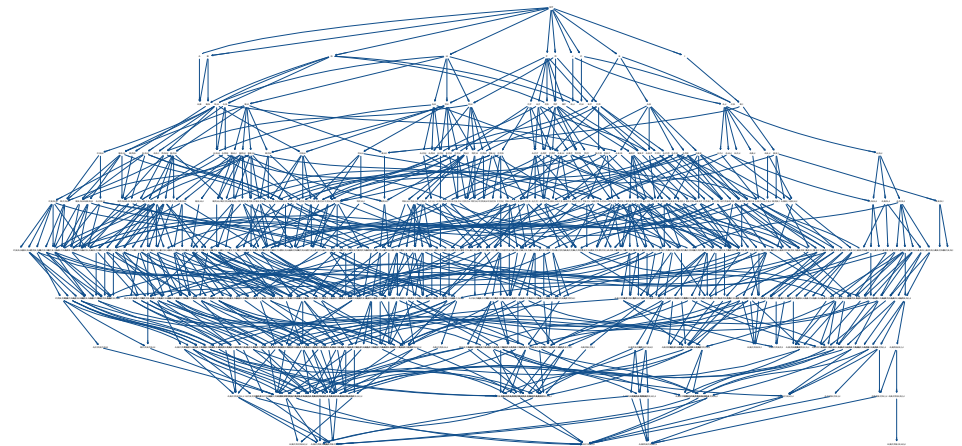

ID La9fqNjWh3MIhyOc  
acc genotypes 286  
peaks no back 51  
removed edges NA  
prop rem edges NA

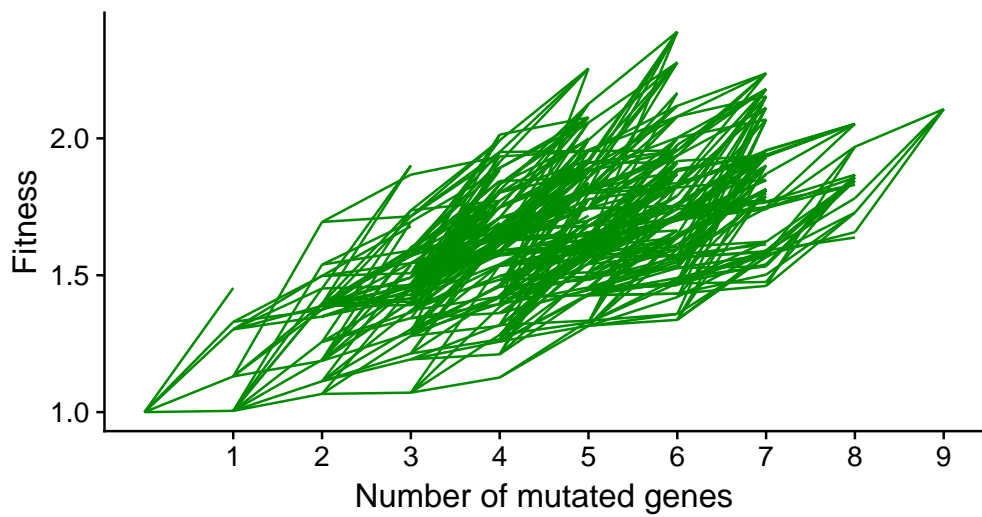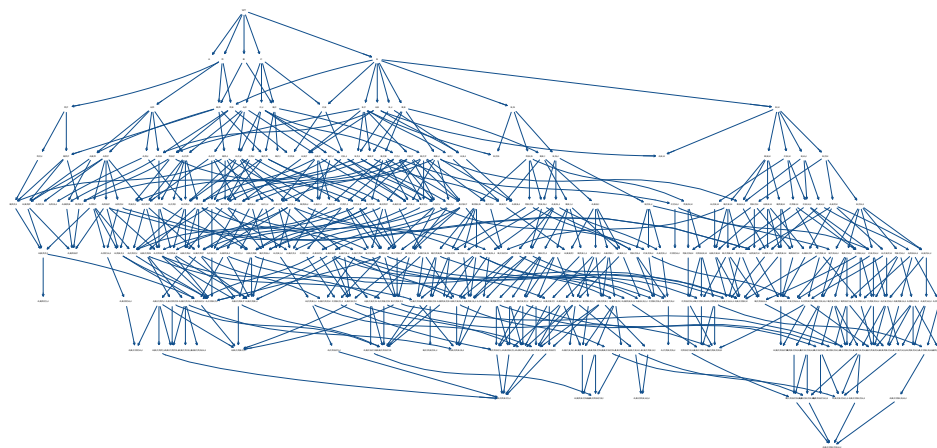

ID LarH6pnhHub1WCoT  
 acc genotypes 119  
 peaks no back 34  
 removed edges NA  
 prop rem edges NA

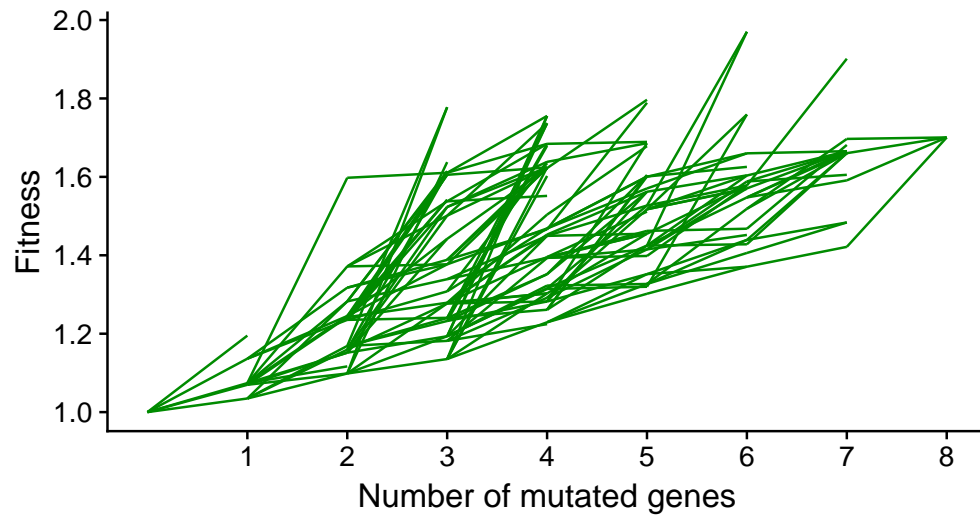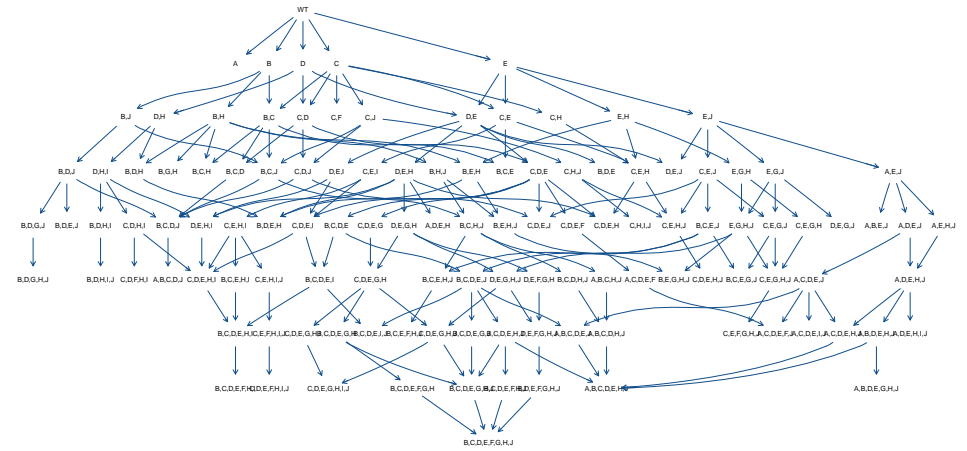

ID **liglbsdWsdVrYD4**  
acc genotypes **183**  
peaks no back **56**  
removed edges **NA**  
prop rem edges **NA**

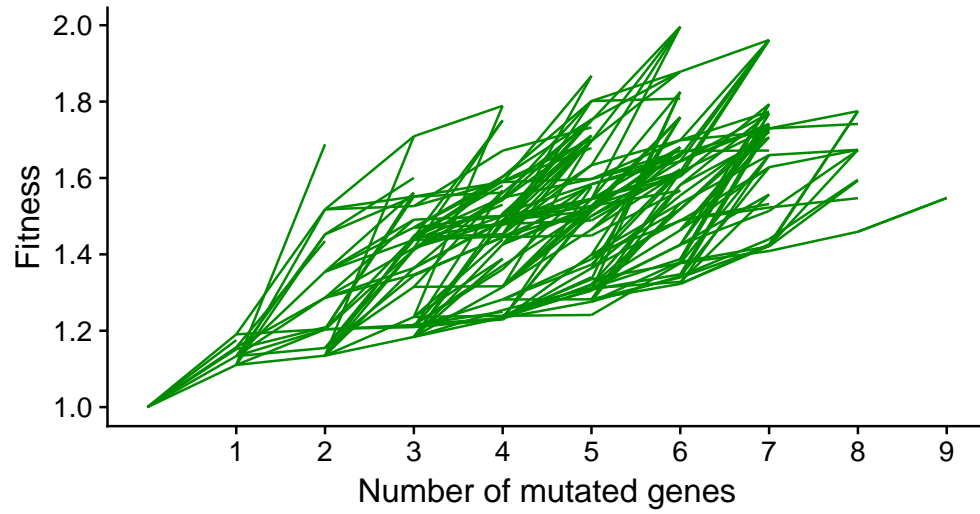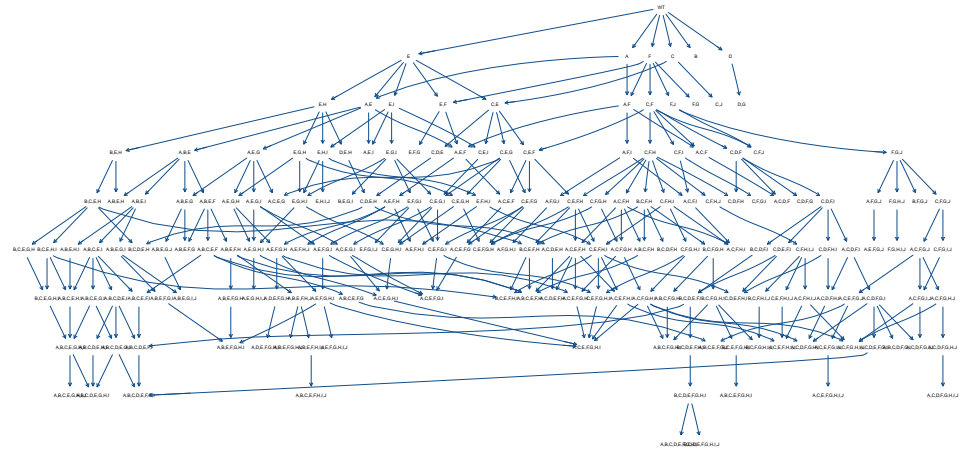

ID LjALbpwaXmX67y1J  
acc genotypes 200  
peaks no back 60  
removed edges NA  
prop rem edges NA

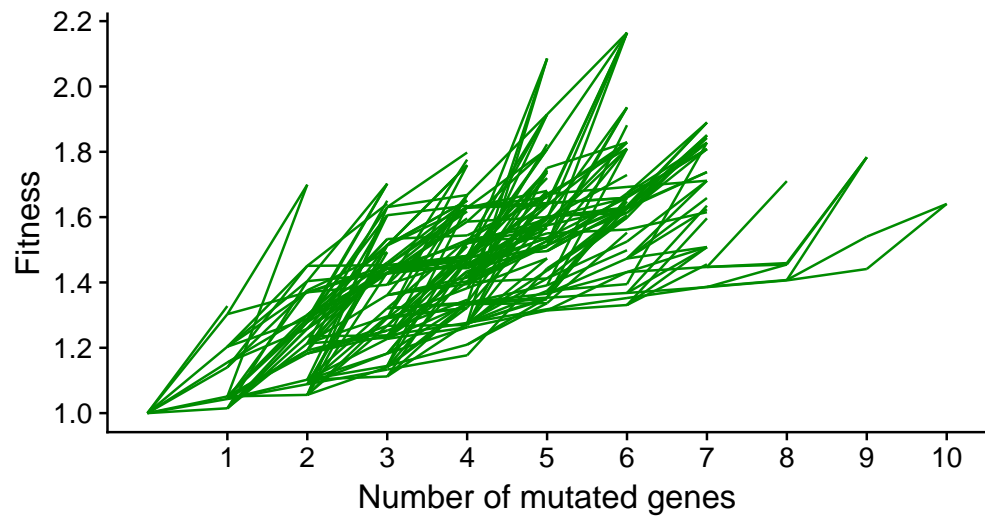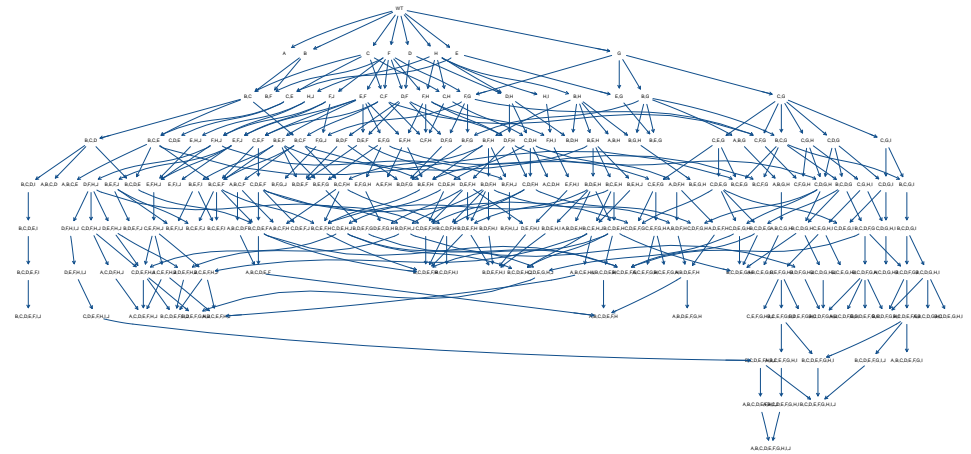

ID **LOsXXnHBIR9Q10wUS**  
 acc genotypes **135**  
 peaks no back 40  
 removed edges NA  
 prop rem edges NA

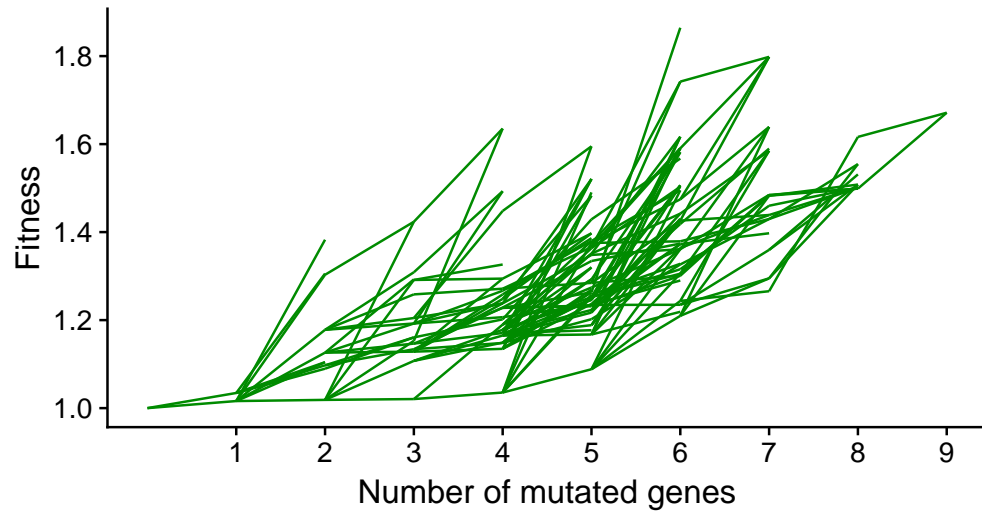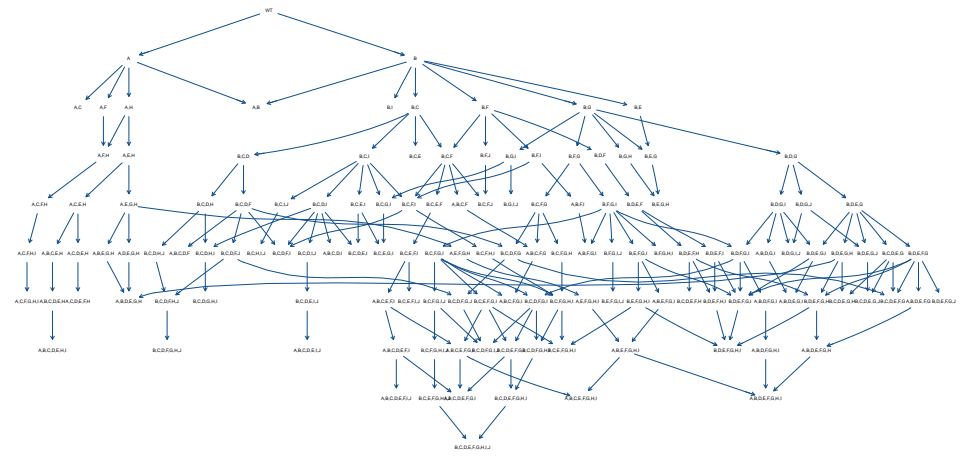

ID LPrNa9xFzuJVcvTs  
acc genotypes 132  
peaks no back 51  
removed edges NA  
prop rem edges NA

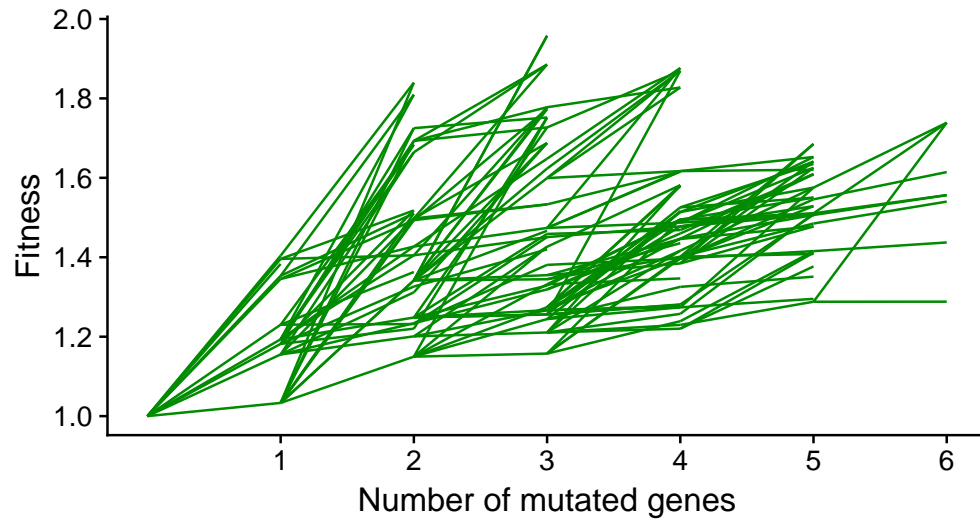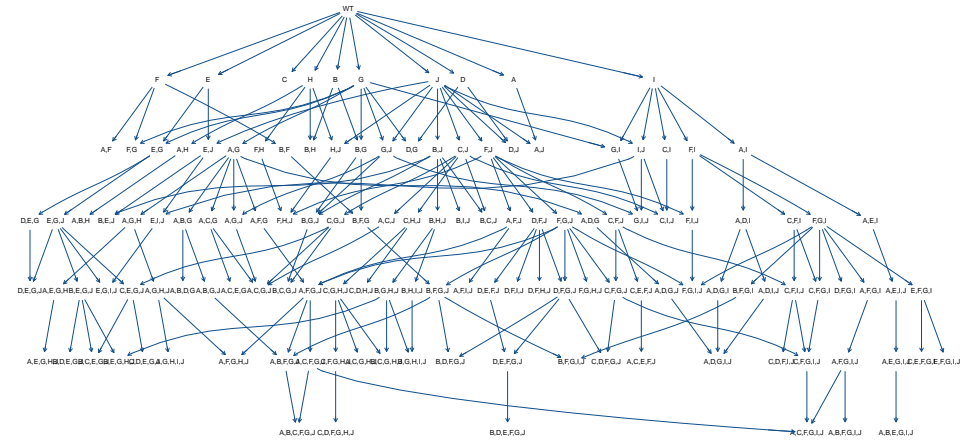



ID **ltssjb6NCBgdBABA**  
acc genotypes **232**  
peaks no back 86  
removed edges NA  
prop rem edges NA

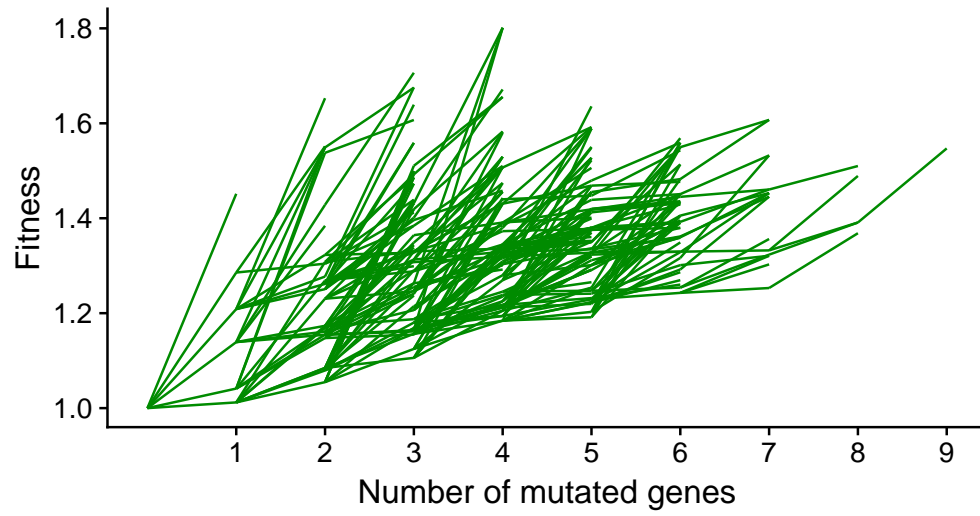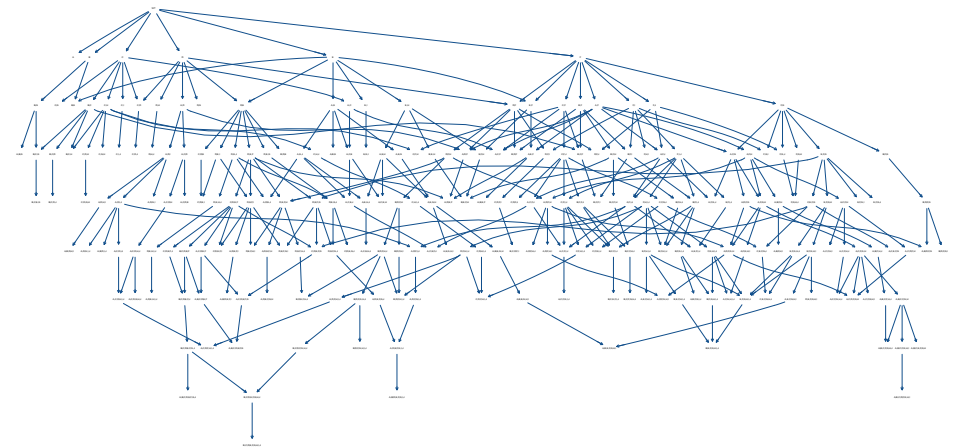

ID LYJKKjI6A3xWjKwy  
acc genotypes 289  
peaks no back 75  
removed edges NA  
prop rem edges NA

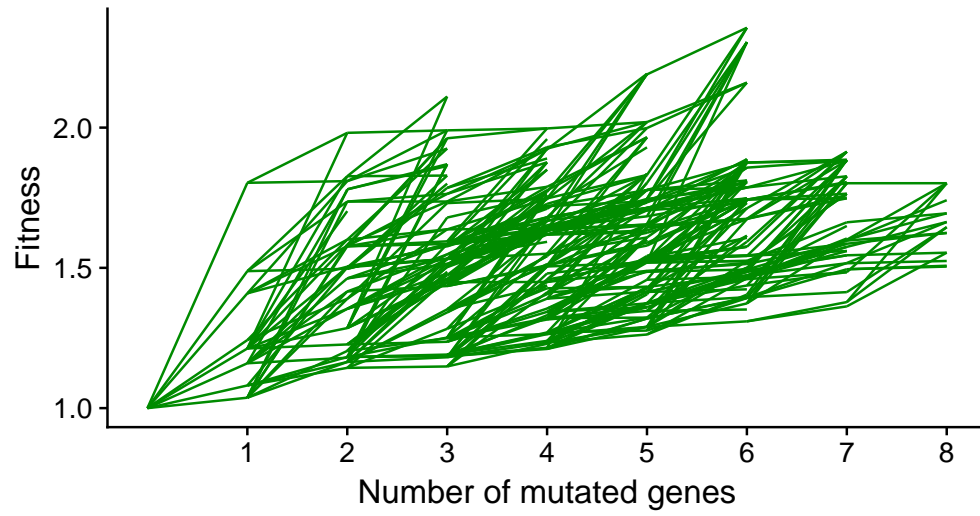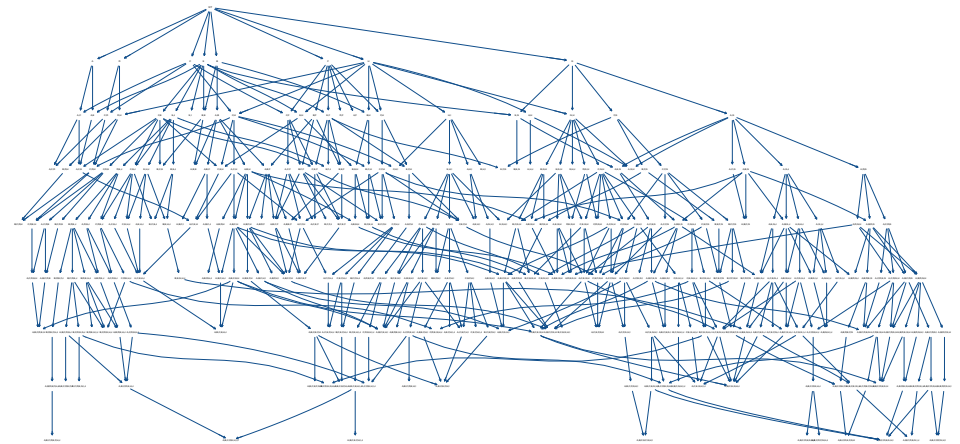

ID MkpqetXw6W2muojH  
acc genotypes 264  
peaks no back 74  
removed edges NA  
prop rem edges NA

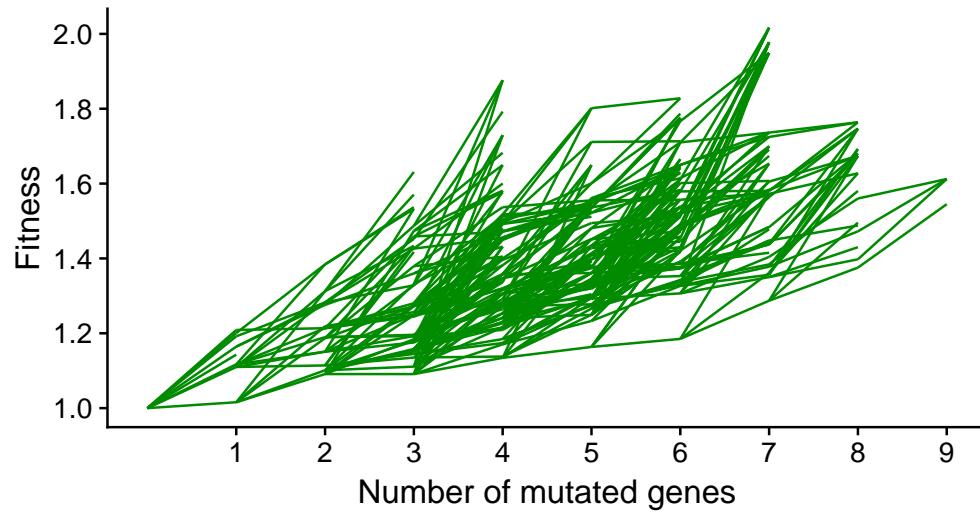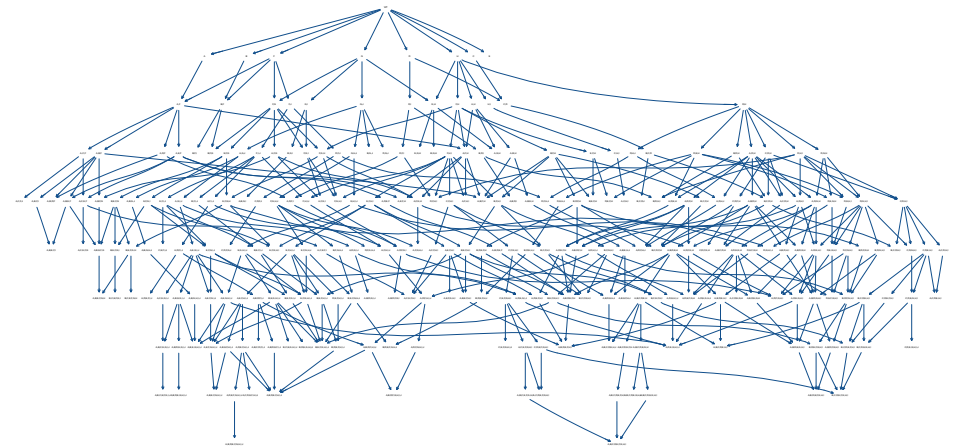

ID **mLM7OEw142104scrX**  
 acc genotypes **107**  
 peaks no back **42**  
 removed edges **NA**  
 prop rem edges **NA**

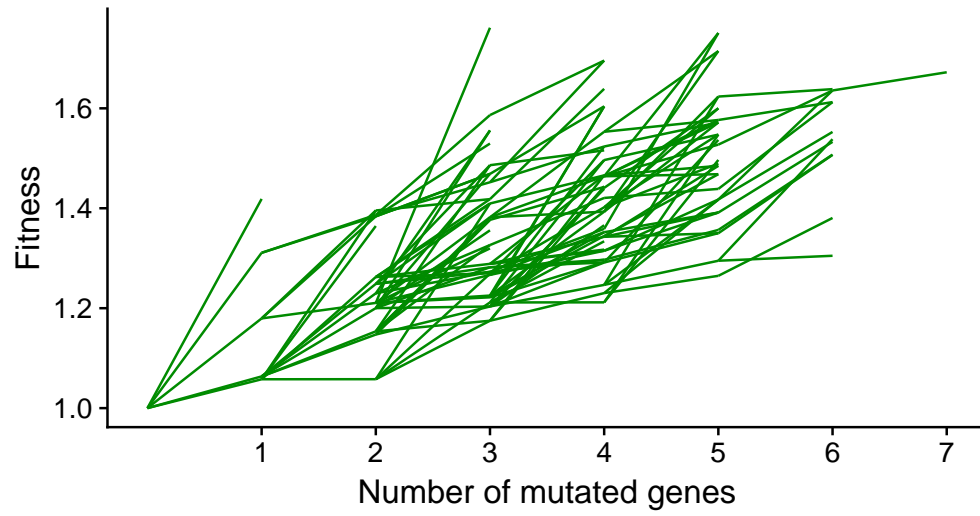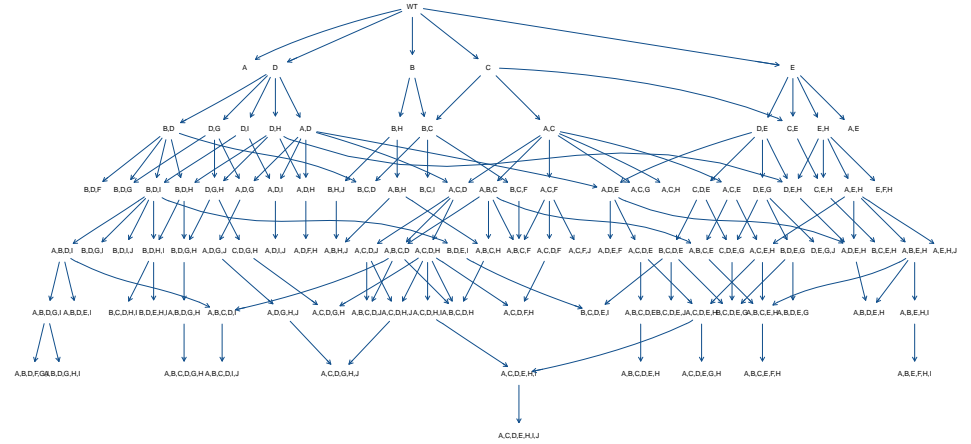

ID mqC38cuoz4YoXqrC  
acc genotypes 214  
peaks no back 74  
removed edges NA  
prop rem edges NA

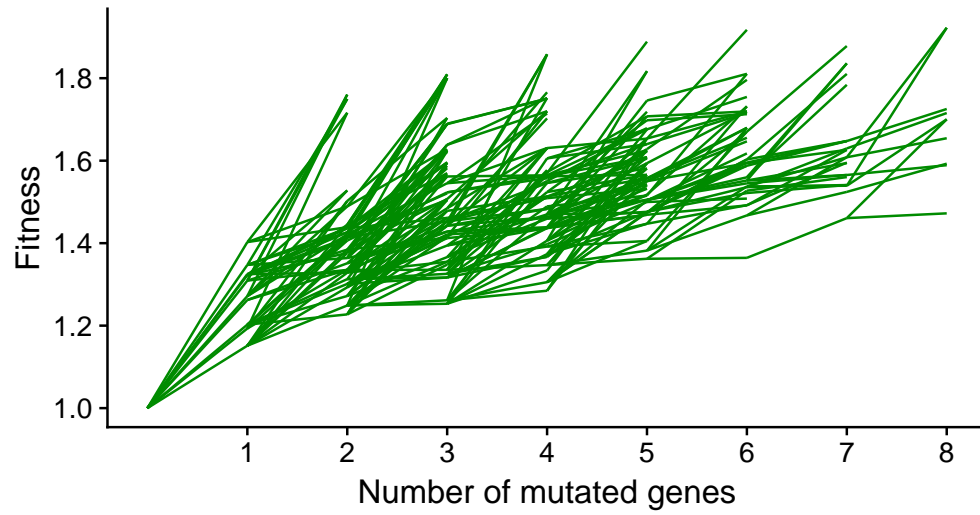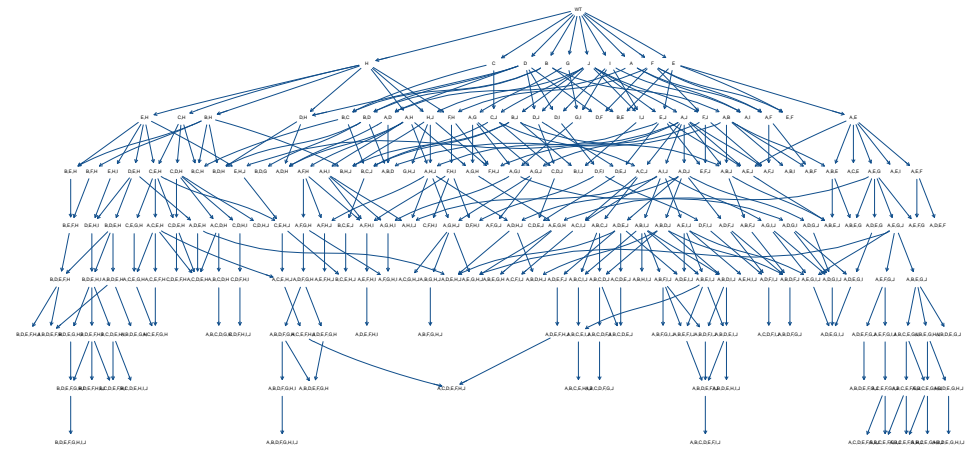

*ID* MtpPxztweNeL6dI  
*acc genotypes* 295  
*peaks no back* 63  
*removed edges* NA  
*prop rem edges* NA

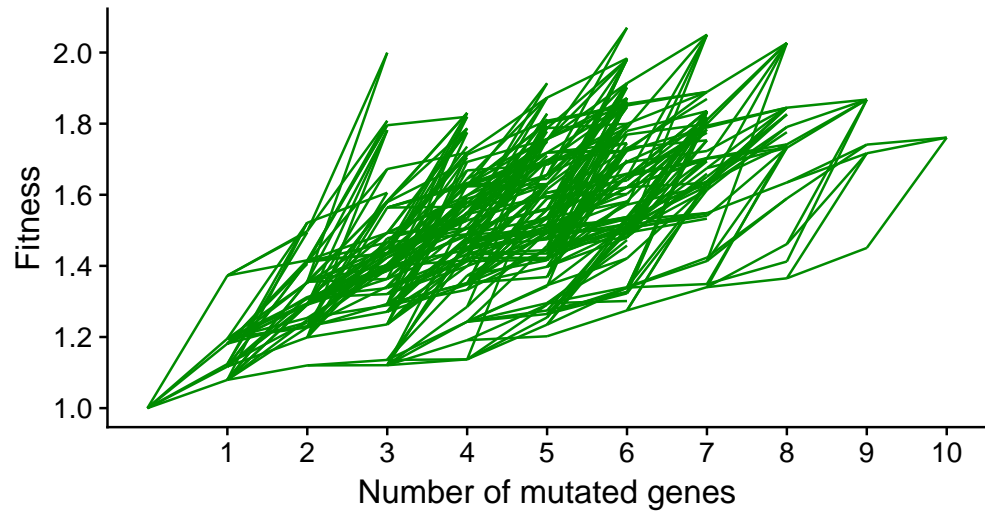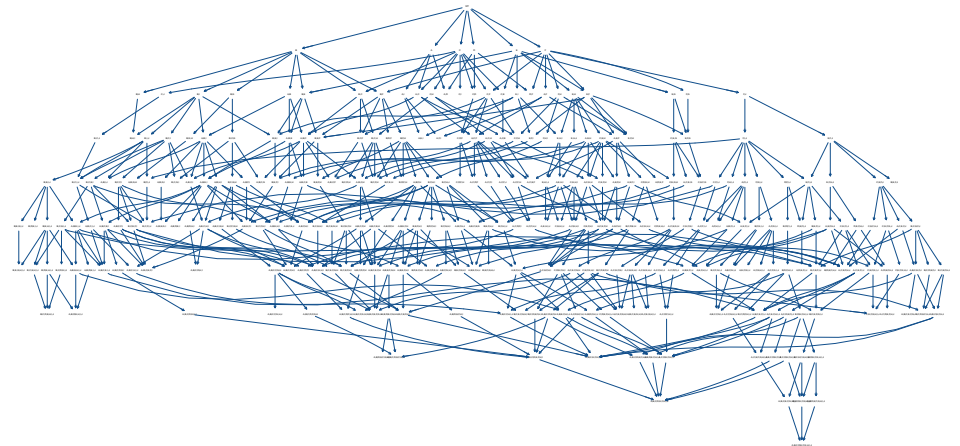

*ID* mYuH5XdoLHUKC10ay  
*acc genotypes* 440  
*peaks no back* 88  
*removed edges* NA  
*prop rem edges* NA

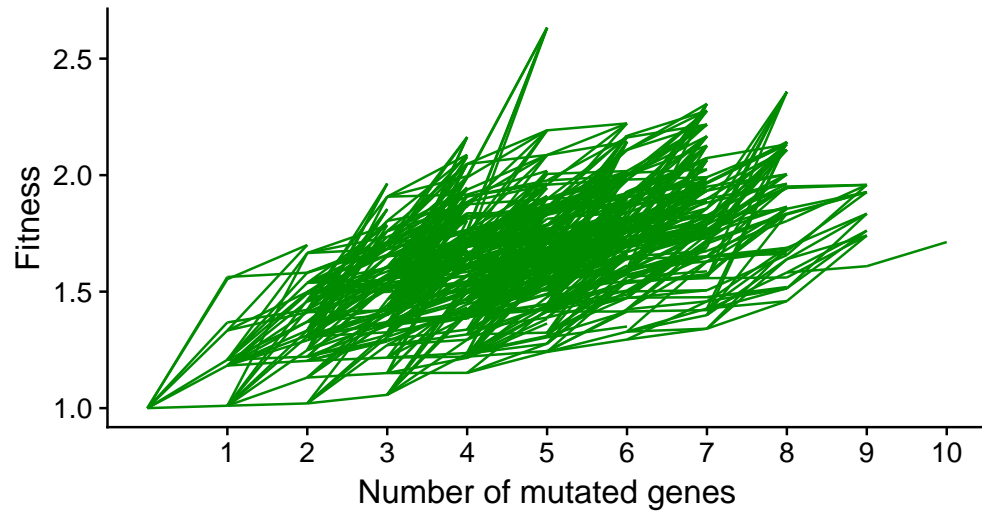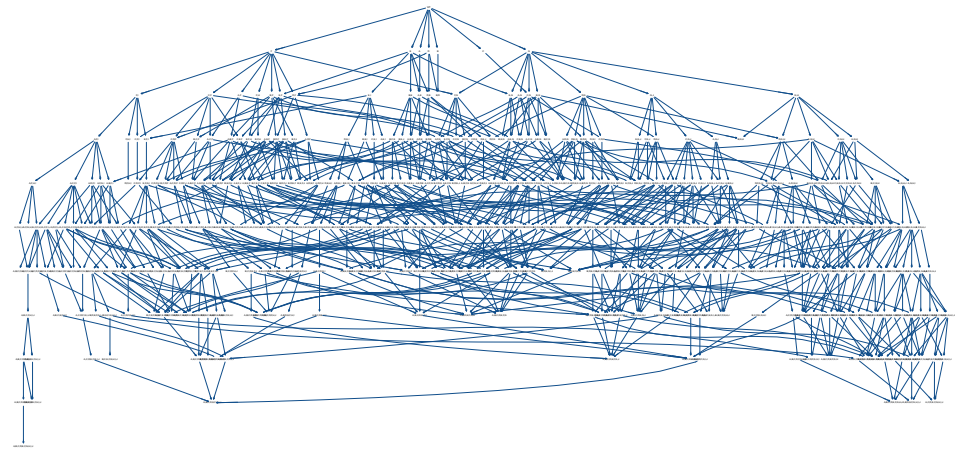

*ID* n10oyDkkU10F10uiAs3  
*acc genotypes* 228  
*peaks no back* 73  
*removed edges* NA  
*prop rem edges* NA

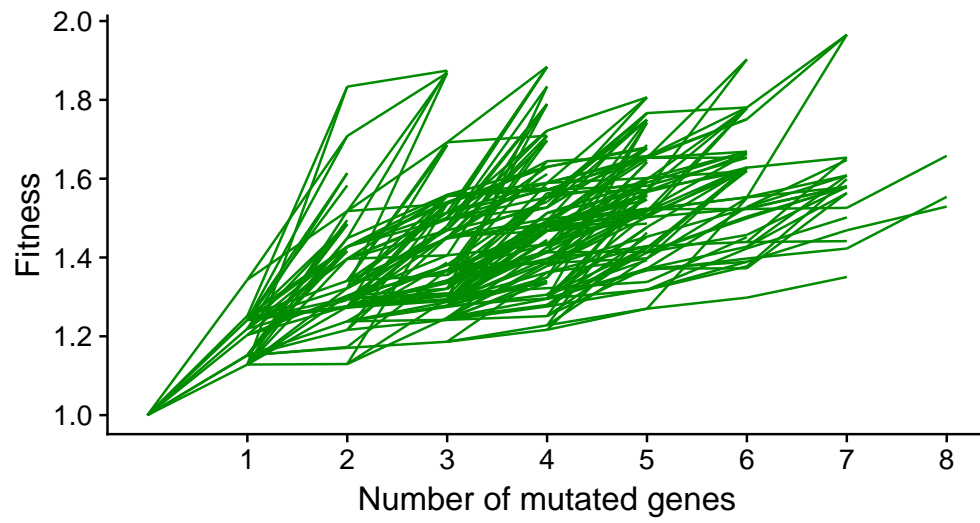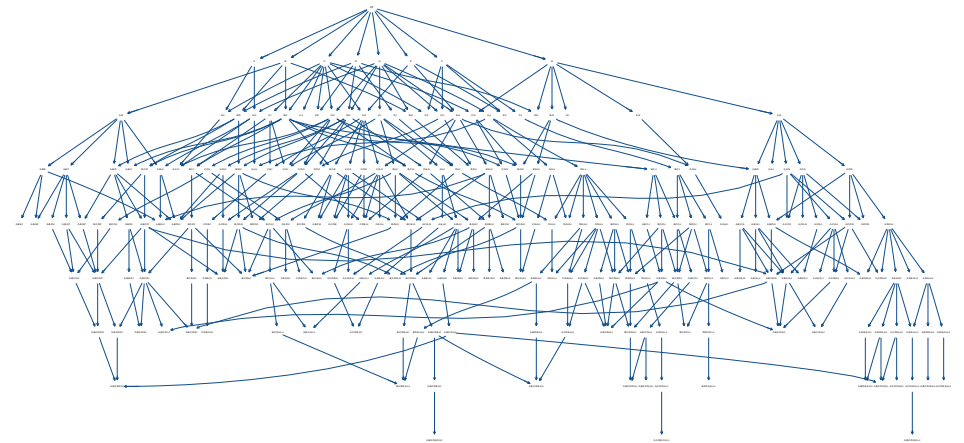



ID Na1044Pj2RIHKS16  
 acc genotypes 30  
 peaks no back 13  
 removed edges NA  
 prop rem edges NA

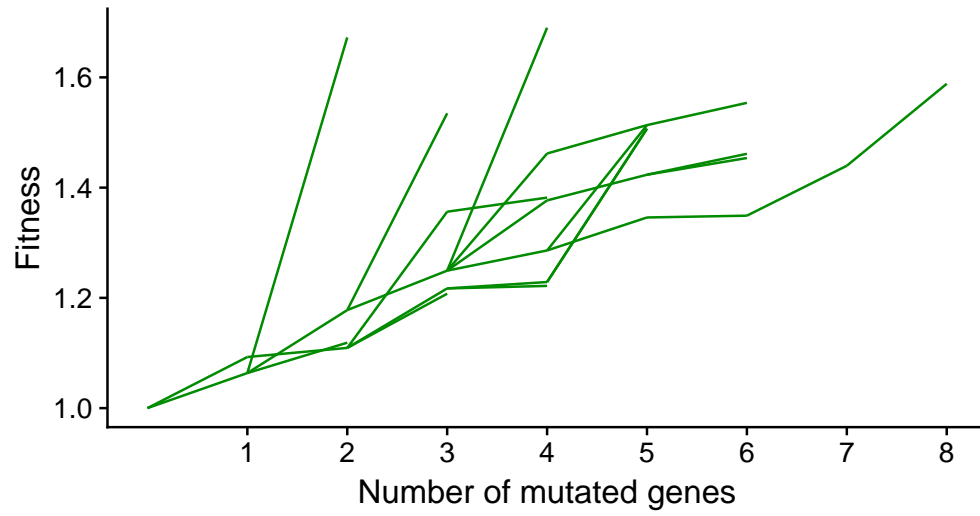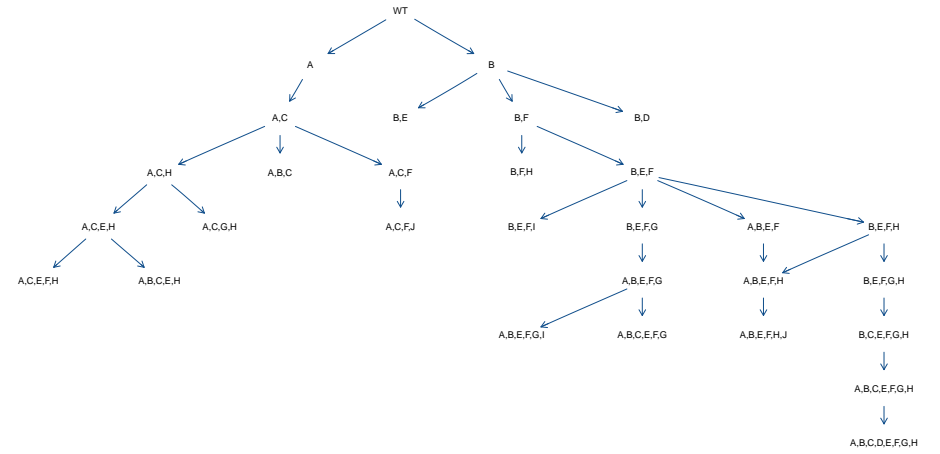

ID Nckkjp8YxmOBJLn  
acc genotypes 176  
peaks no back 45  
removed edges NA  
prop rem edges NA

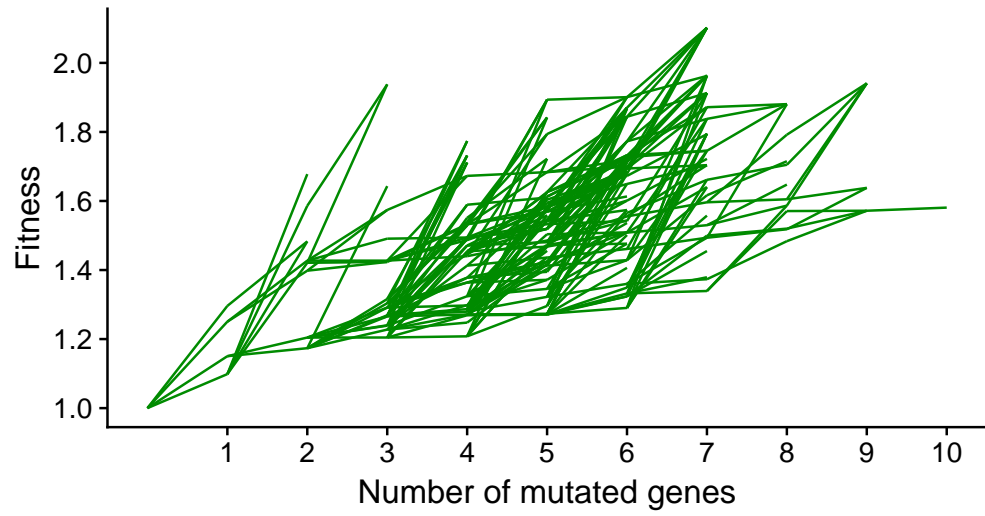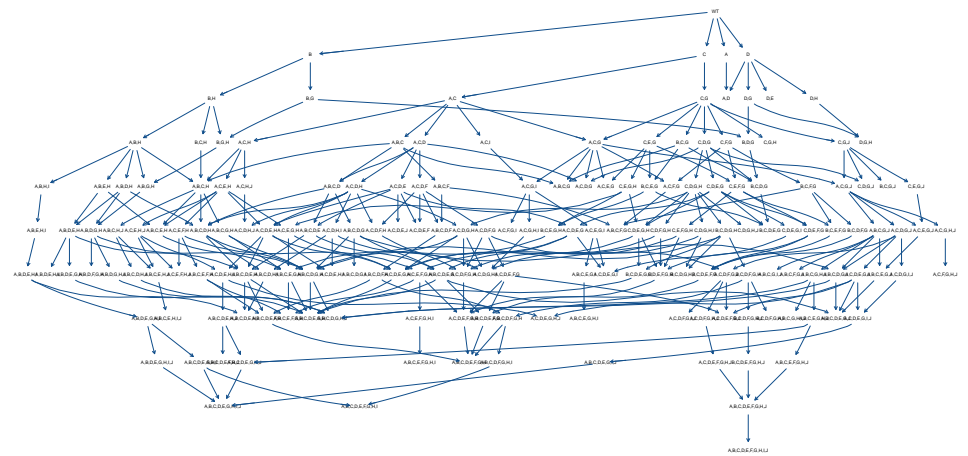

*ID* nFFAJ57LcDAfoeJ  
*acc genotypes* 537  
*peaks no back* 73  
*removed edges* NA  
*prop rem edges* NA

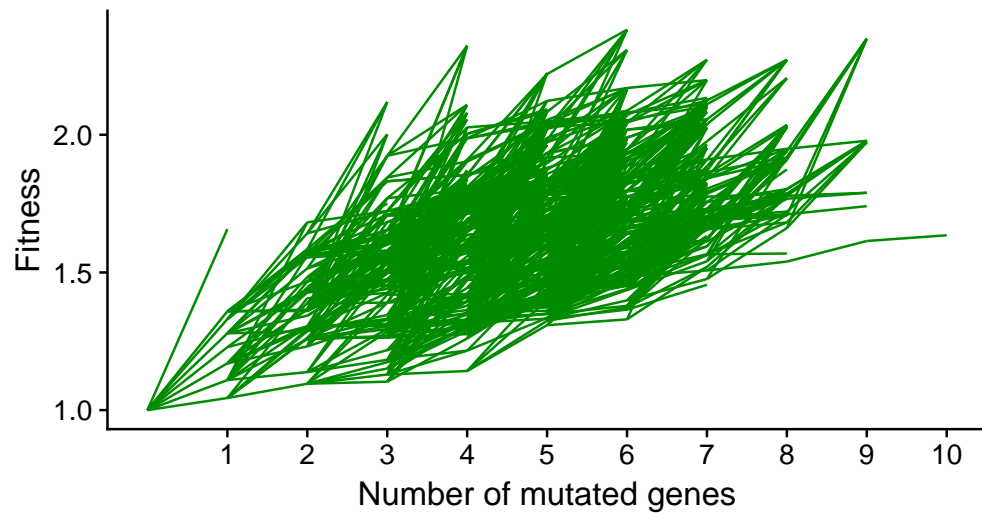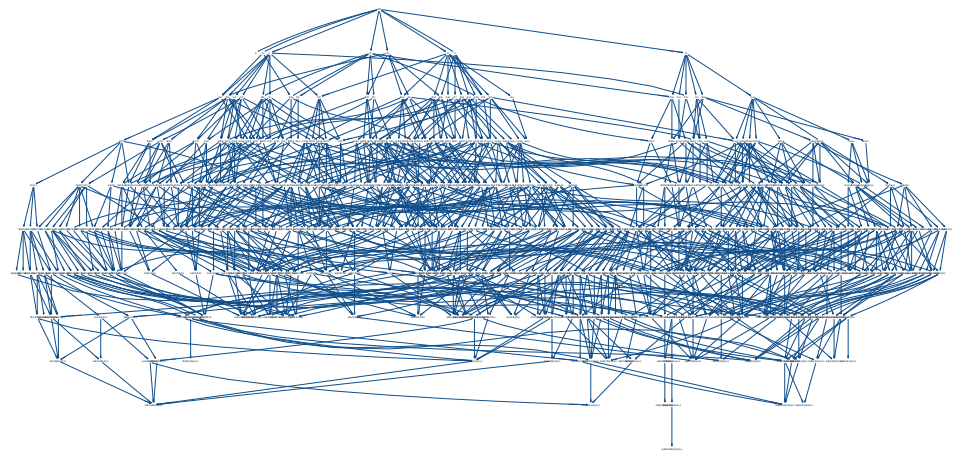

ID nFGvQLr121eGqkyD  
acc genotypes 138  
peaks no back 51  
removed edges NA  
prop rem edges NA

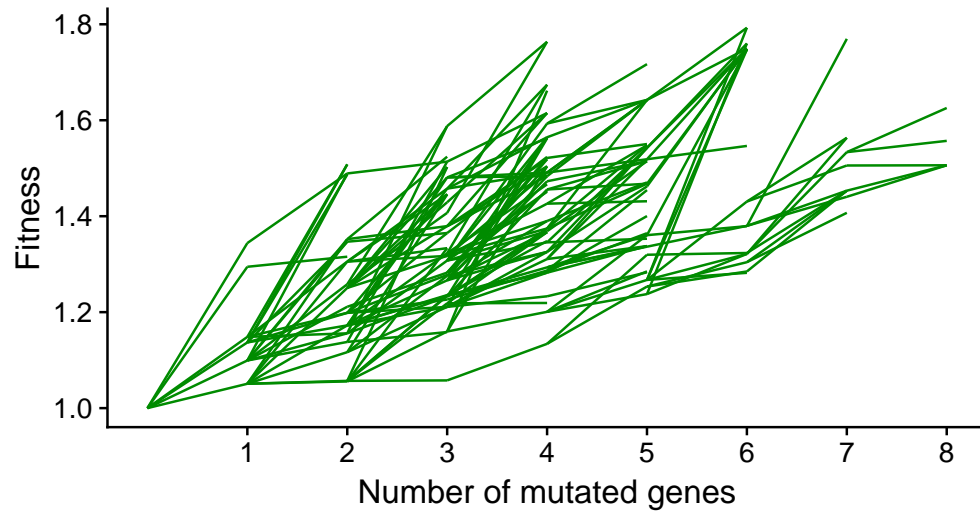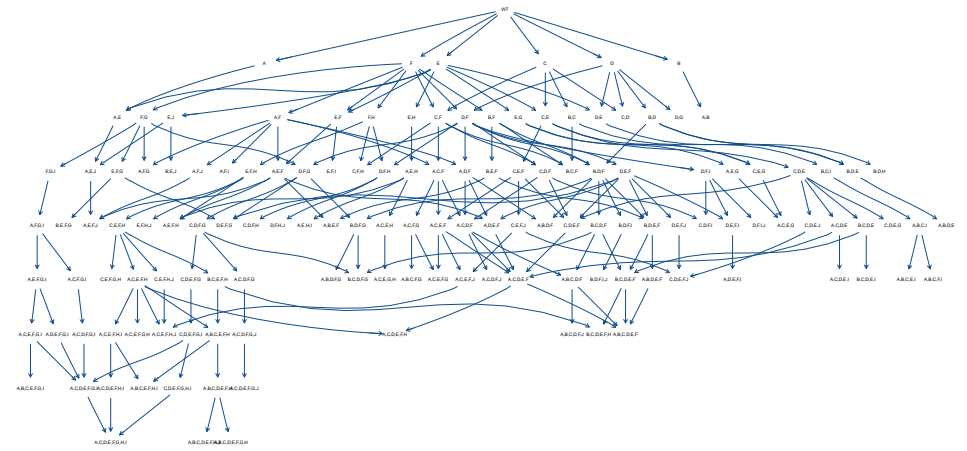

*ID* OcPH3CcYp51kr5sW  
*acc genotypes* 541  
*peaks no back* 62  
*removed edges* NA  
*prop rem edges* NA

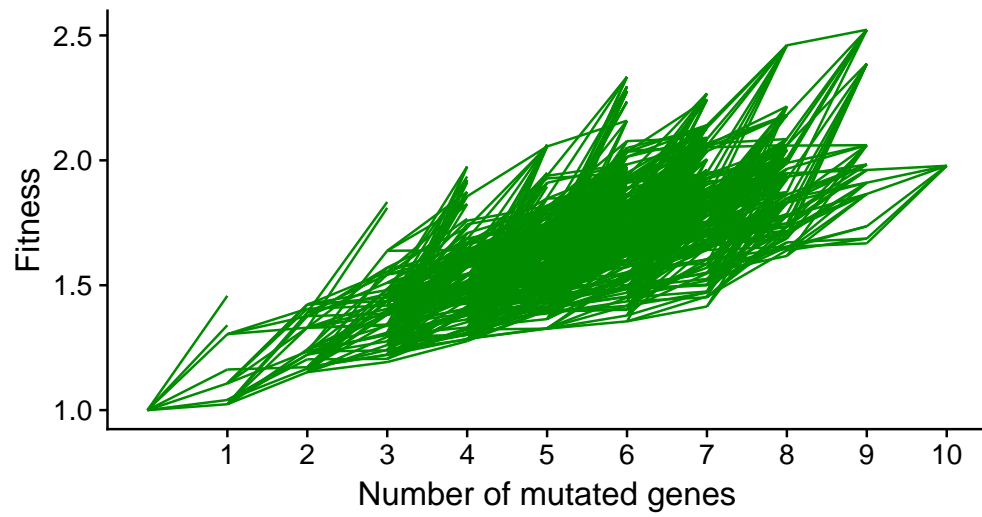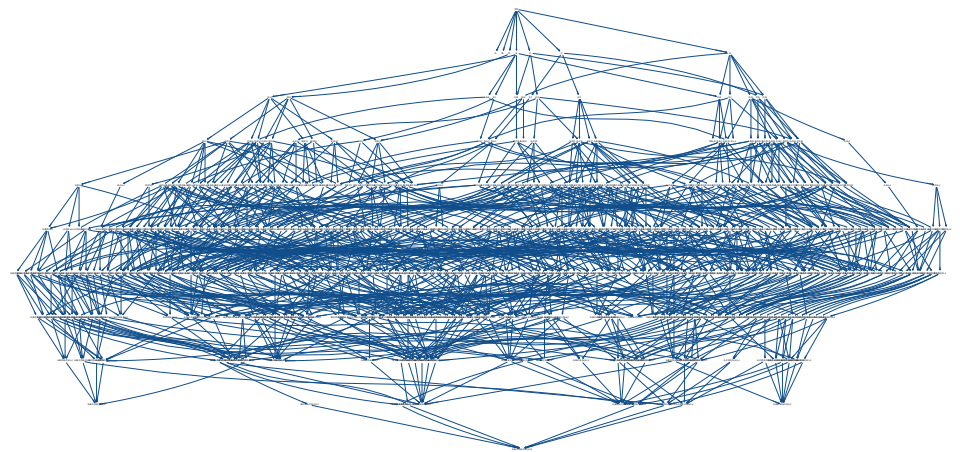

ID OGxF8Oyy15NLRVHt  
 acc genotypes 147  
 peaks no back 63  
 removed edges NA  
 prop rem edges NA

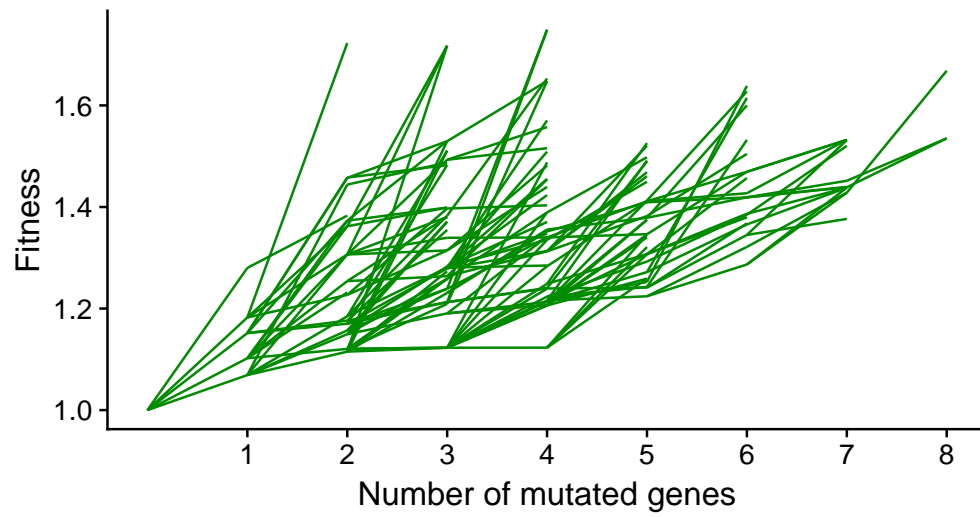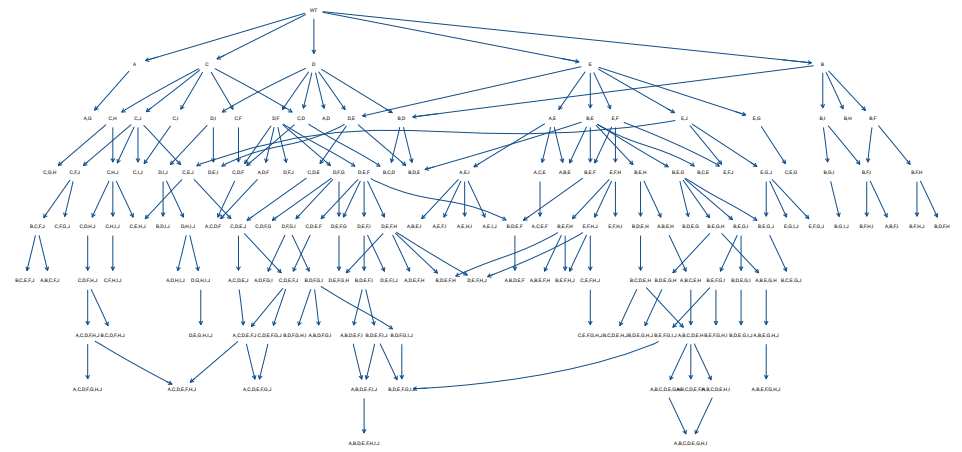

*ID* Oh105Ra4cDXvsiqOA  
*acc genotypes* 468  
*peaks no back* 63  
*removed edges* NA  
*prop rem edges* NA

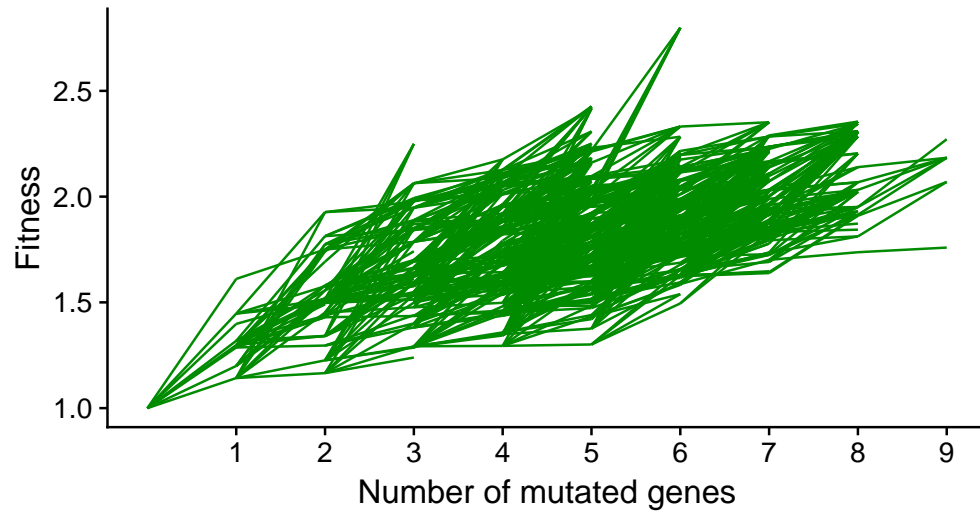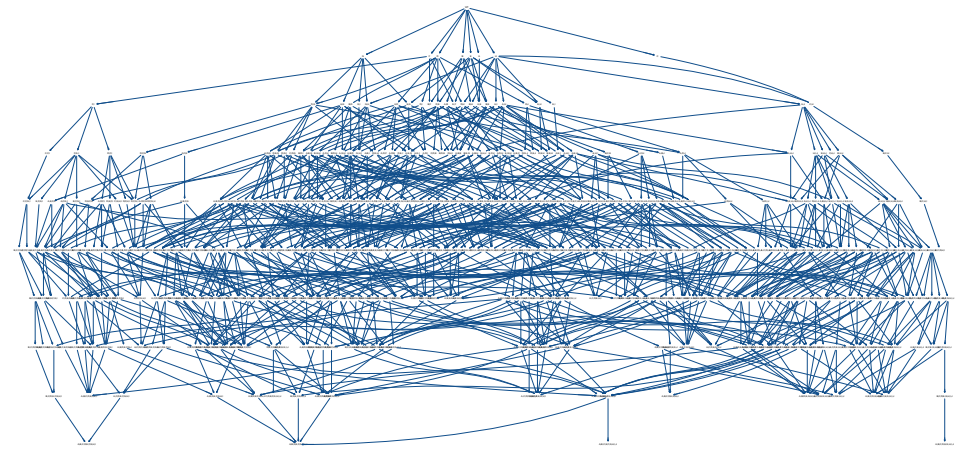

ID Oj6oyBsD3bxROStD  
 acc genotypes 134  
 peaks no back 54  
 removed edges NA  
 prop rem edges NA

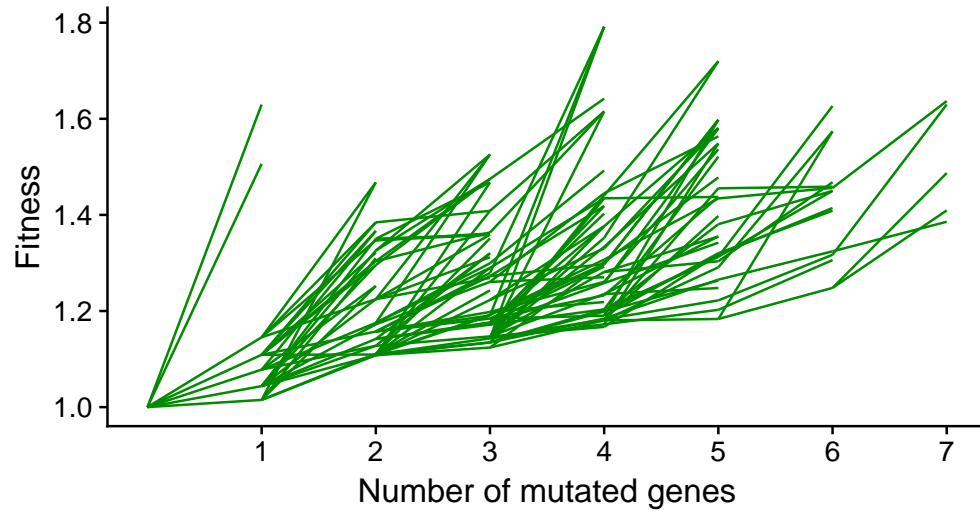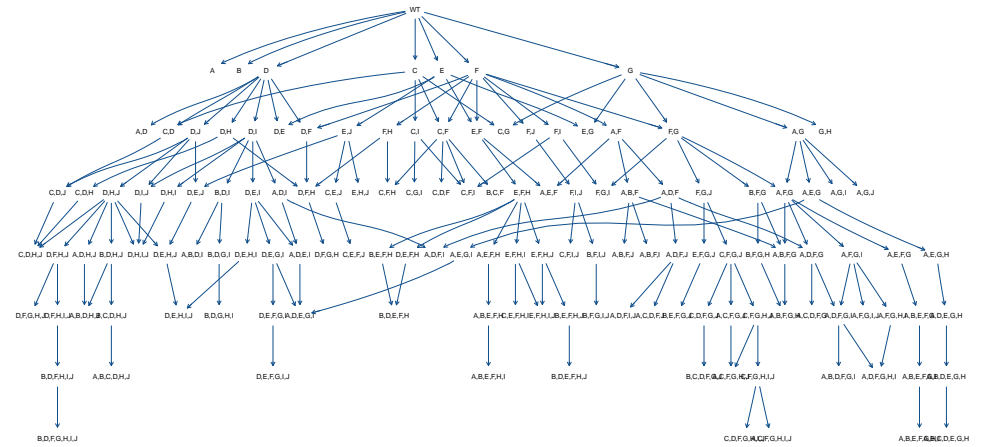





ID p2Hy10RKJmoyhCKd10  
 acc genotypes 140  
 peaks no back 50  
 removed edges NA  
 prop rem edges NA

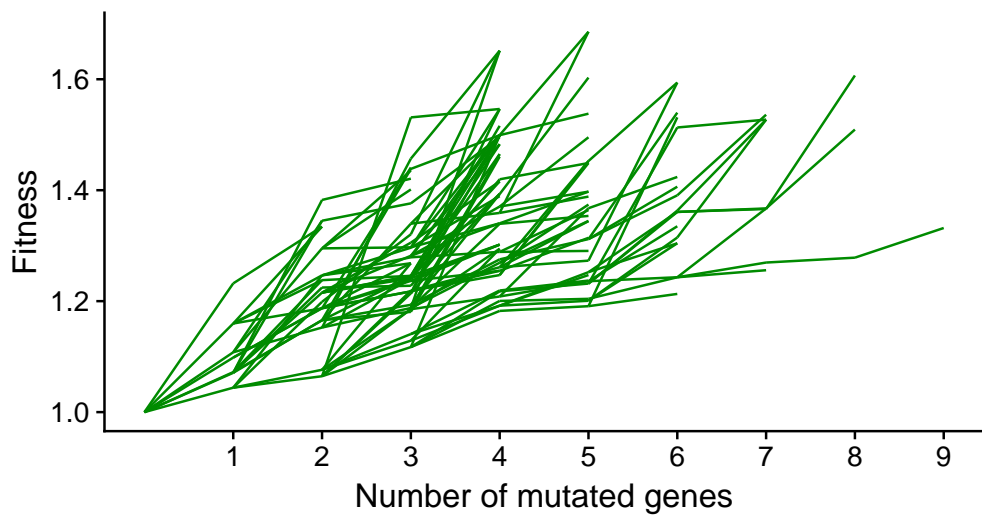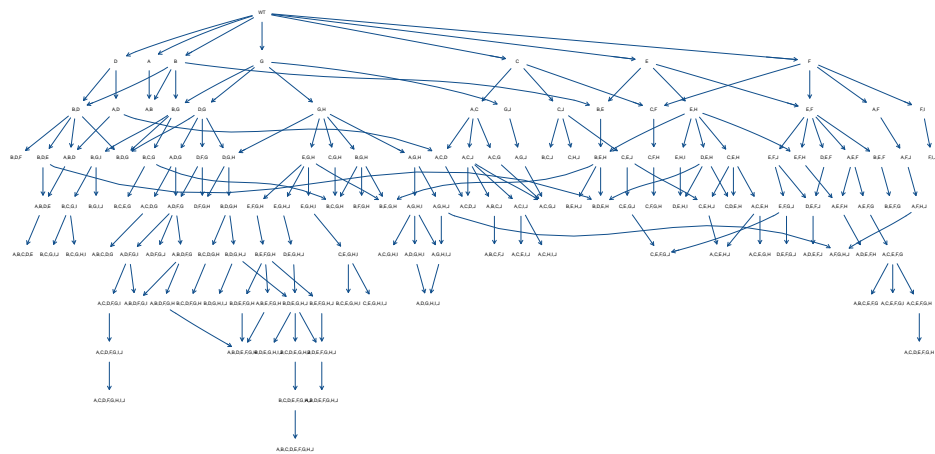

*ID* pcFmFiSb1dmNWs7Q  
*acc genotypes* 333  
*peaks no back* 105  
*removed edges* NA  
*prop rem edges* NA

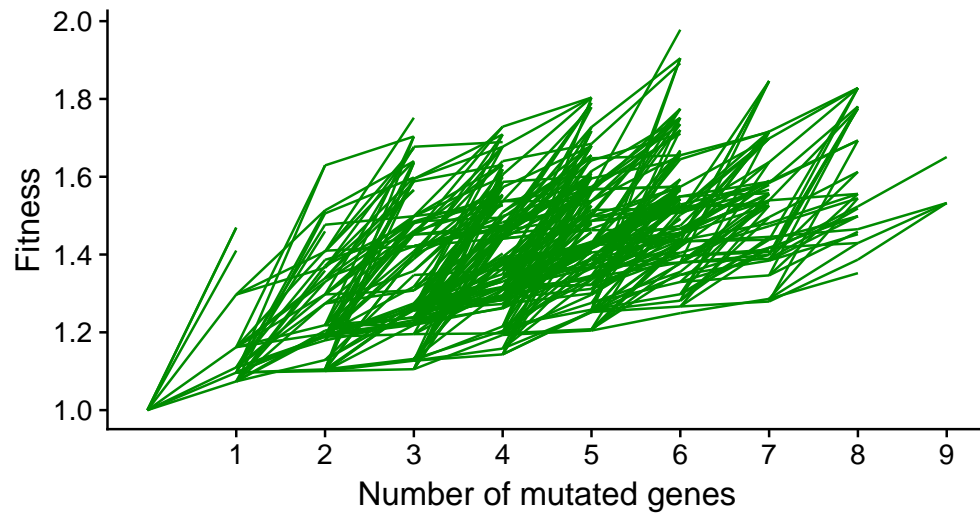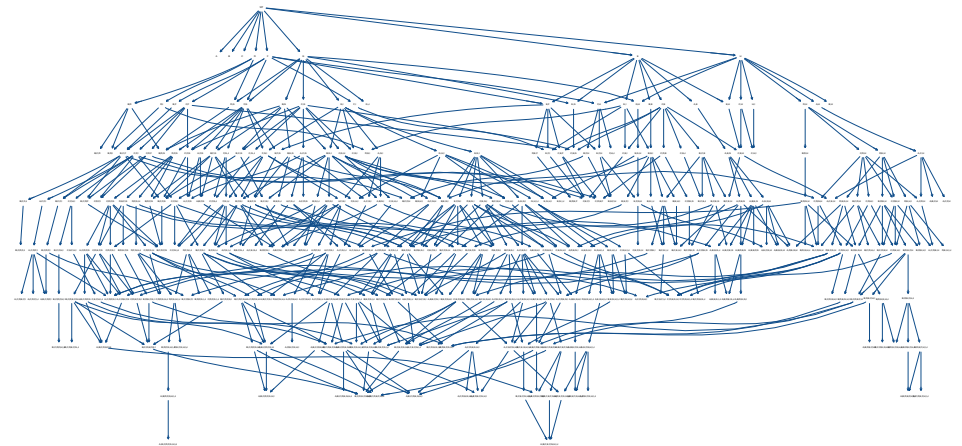

ID pF515adN8ZsnzdgE  
acc genotypes 276  
peaks no back 100  
removed edges NA  
prop rem edges NA

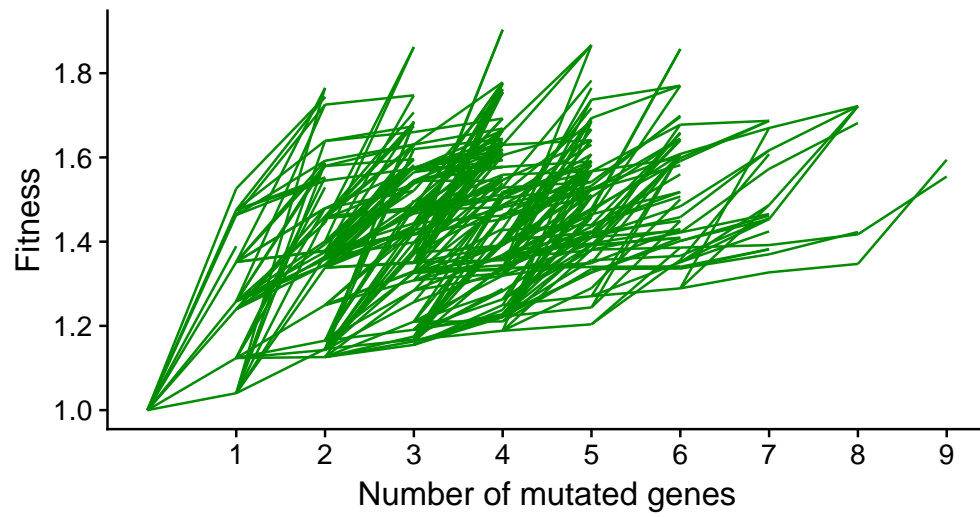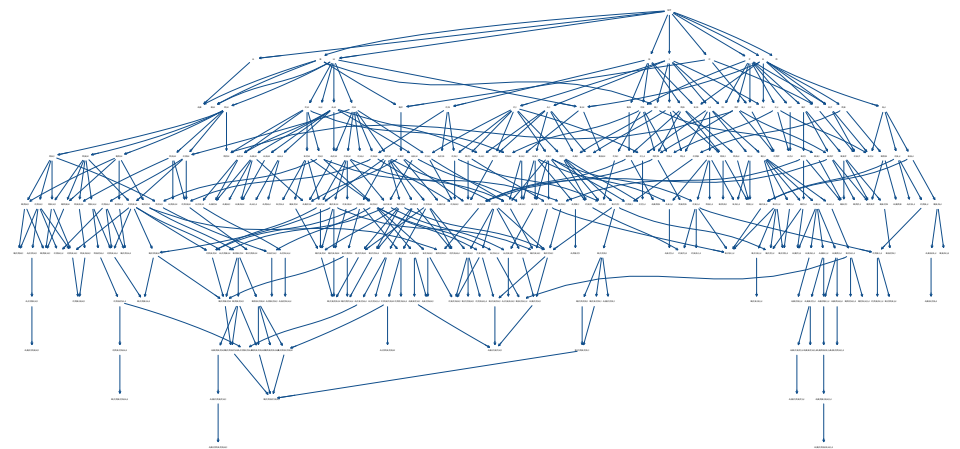

ID Pje92ruf6BDq1QiQ  
 acc genotypes 111  
 peaks no back 40  
 removed edges NA  
 prop rem edges NA

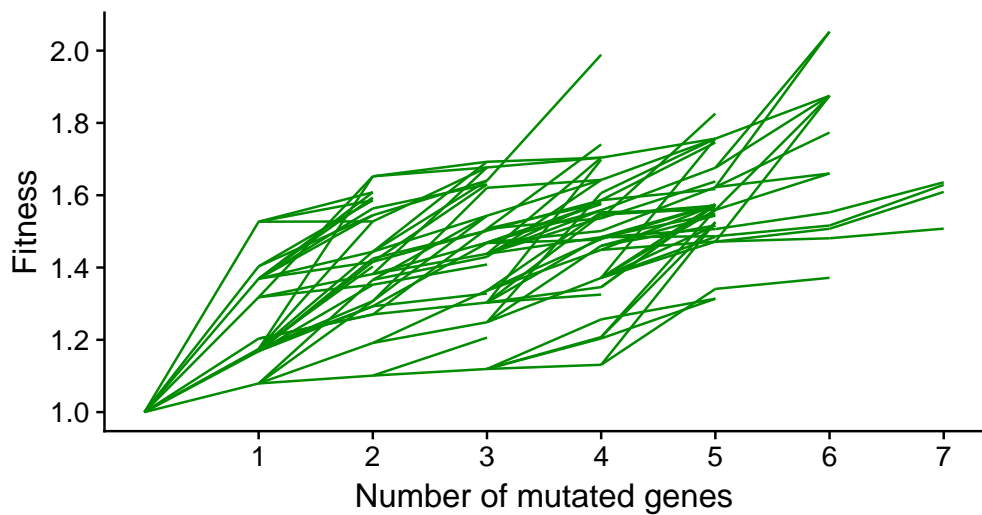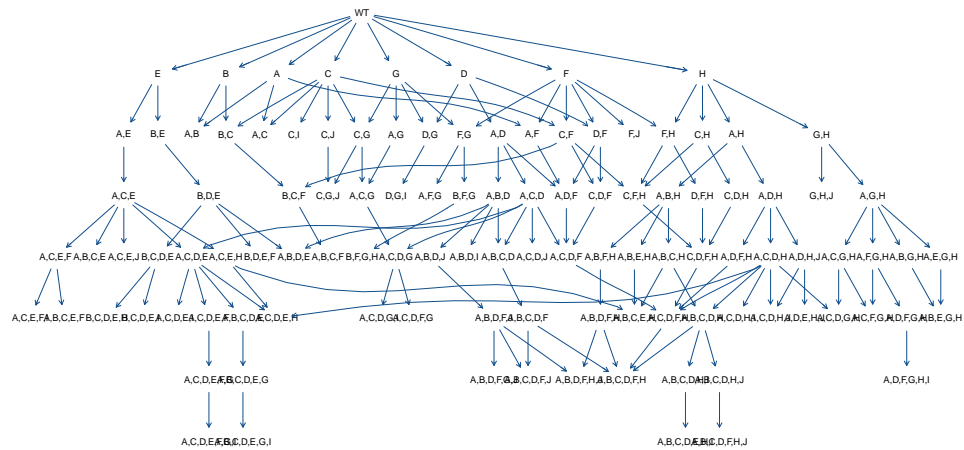

*ID* PmQfeqFvnFM6z8Uz  
*acc genotypes* 276  
*peaks no back* 75  
*removed edges* NA  
*prop rem edges* NA

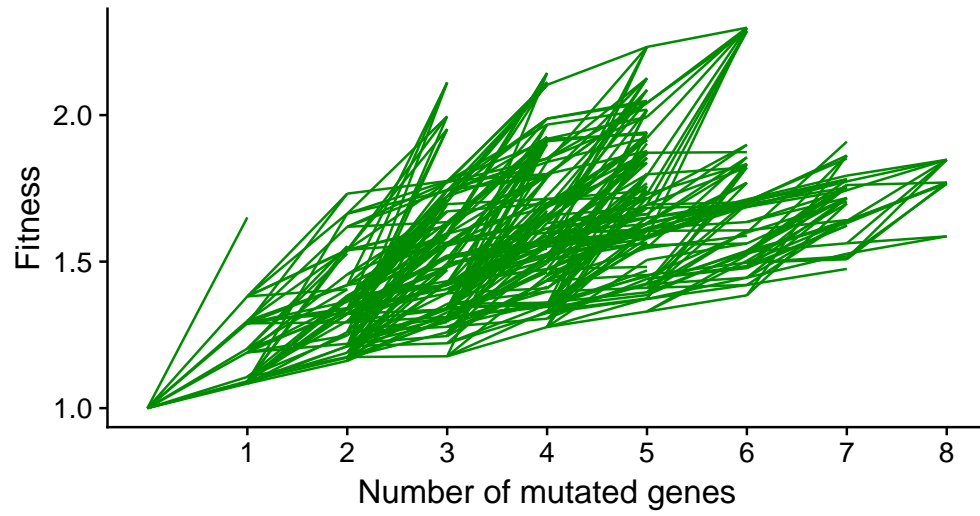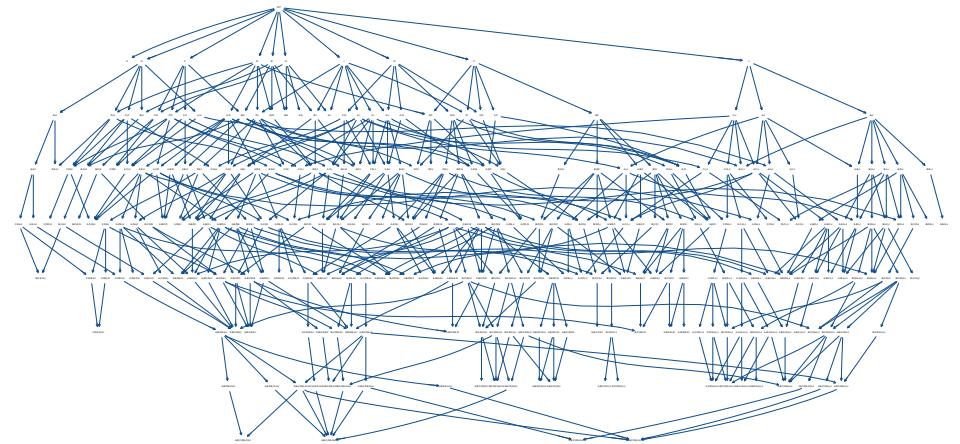



ID q6ESfEnjdJLQJKzP  
 acc genotypes 110  
 peaks no back 41  
 removed edges NA  
 prop rem edges NA

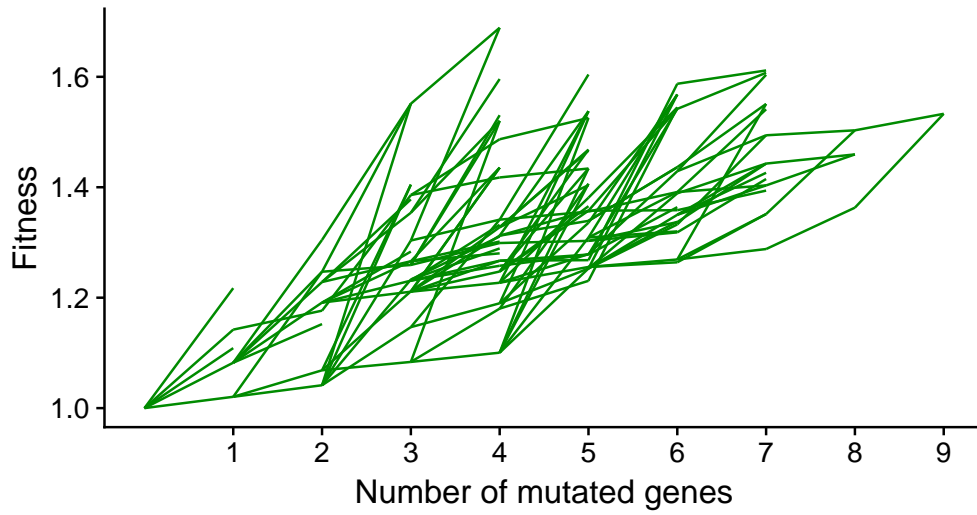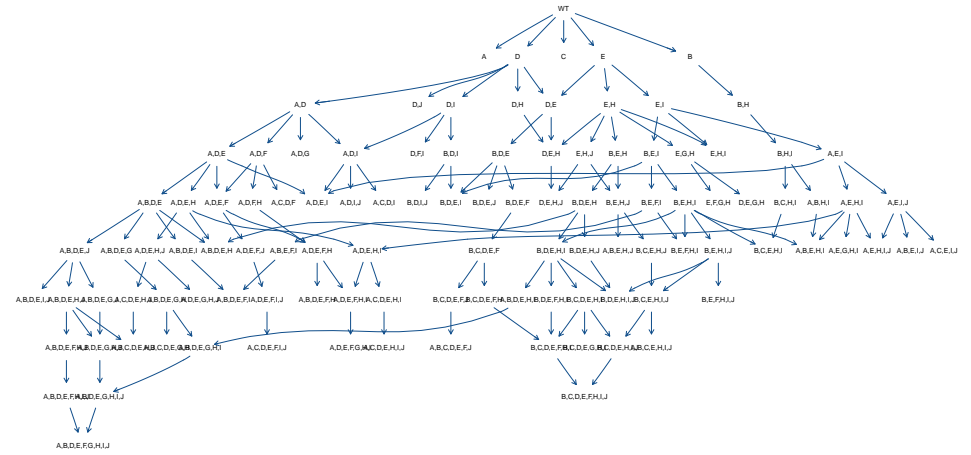



*ID* QDfWYRc6C9mw910Q  
*acc genotypes* 251  
*peaks no back* 69  
*removed edges* NA  
*prop rem edges* NA

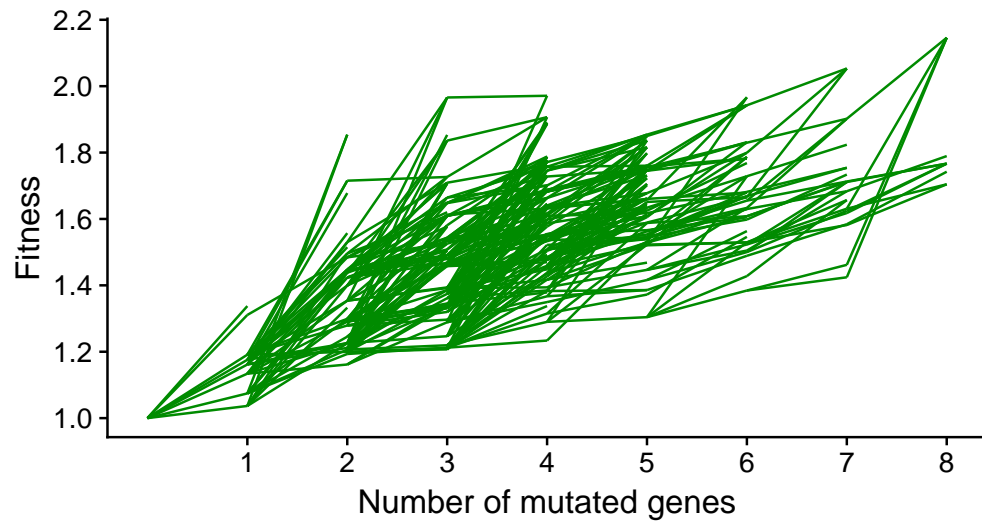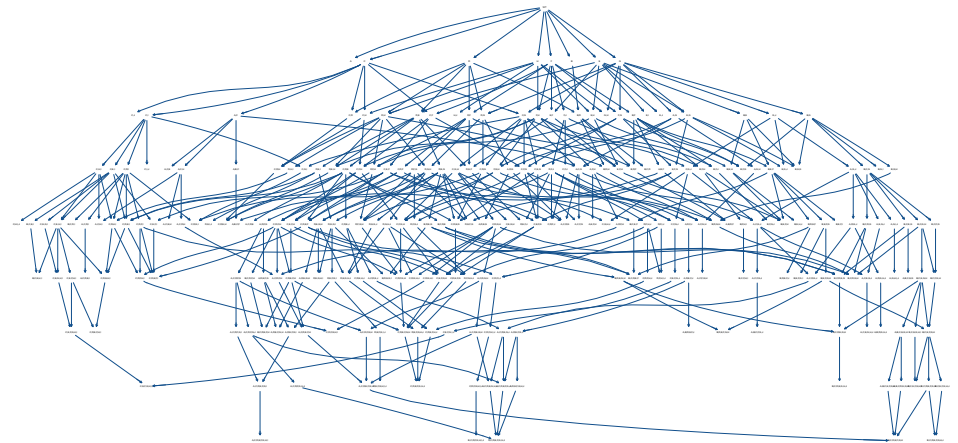

*ID* QDnBQv95LeMoDZkz  
*acc genotypes* 397  
*peaks no back* 113  
*removed edges* NA  
*prop rem edges* NA

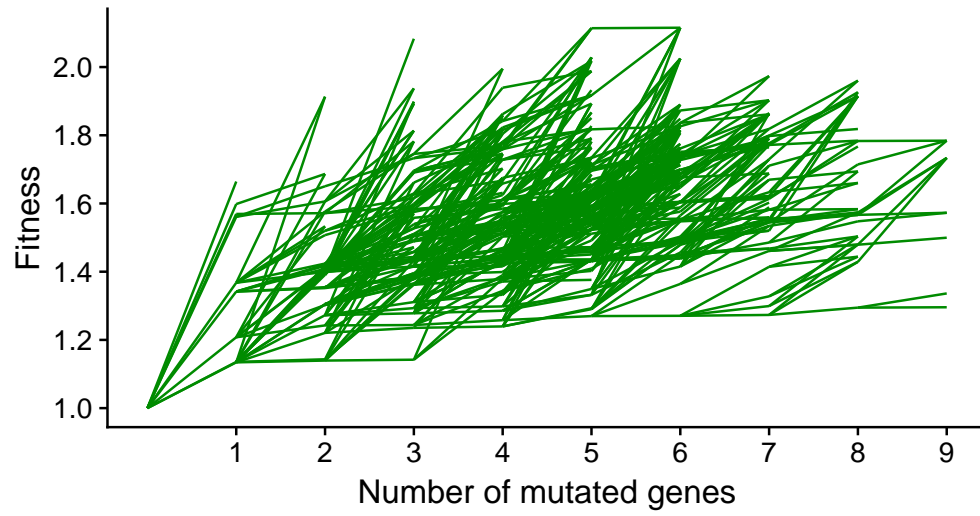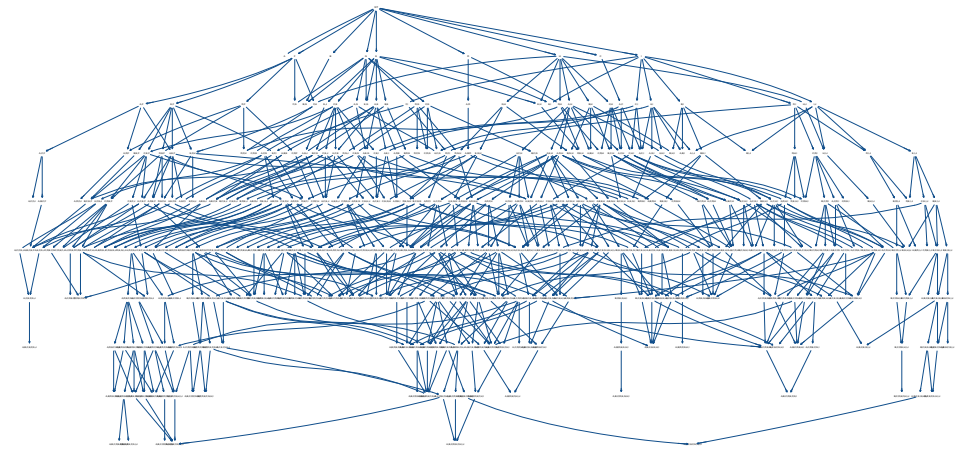

ID qhoM9EMECJiKAEai  
acc genotypes 301  
peaks no back 43  
removed edges NA  
prop rem edges NA

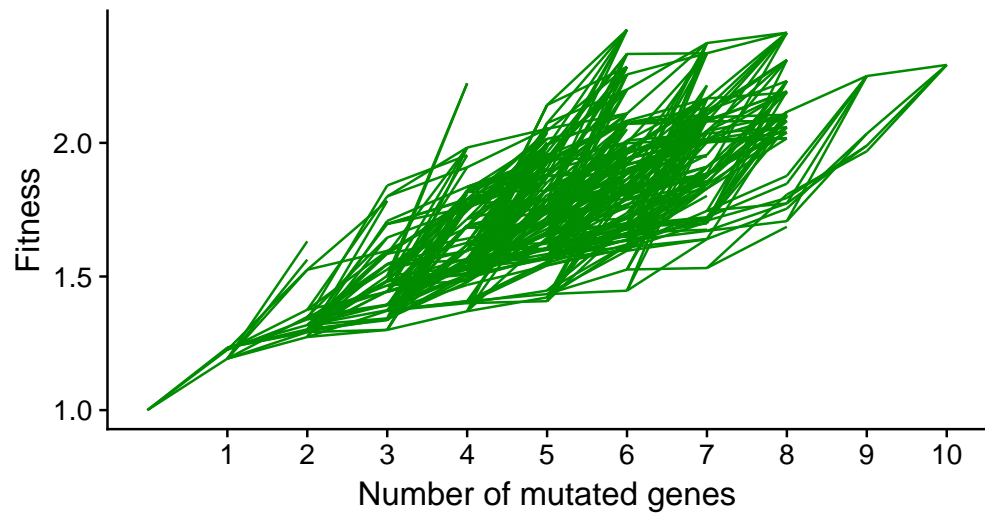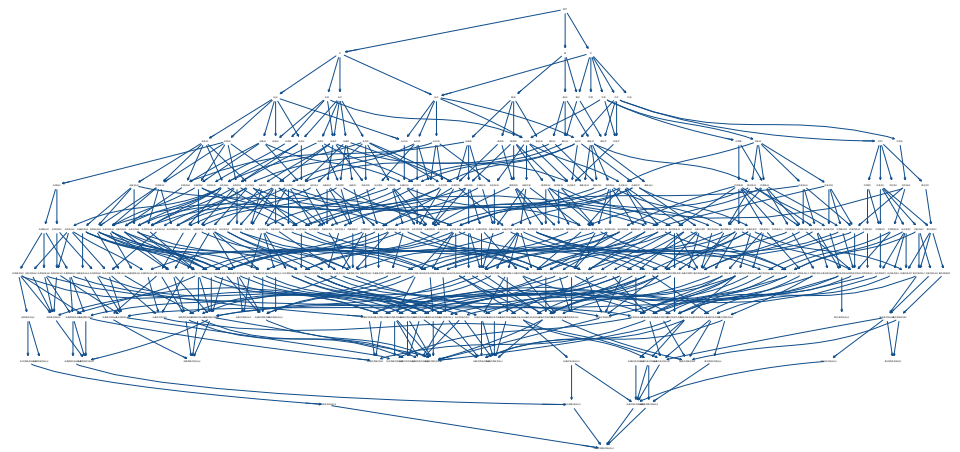

ID qlG3omWesEf8erJY  
acc genotypes 330  
peaks no back 79  
removed edges NA  
prop rem edges NA

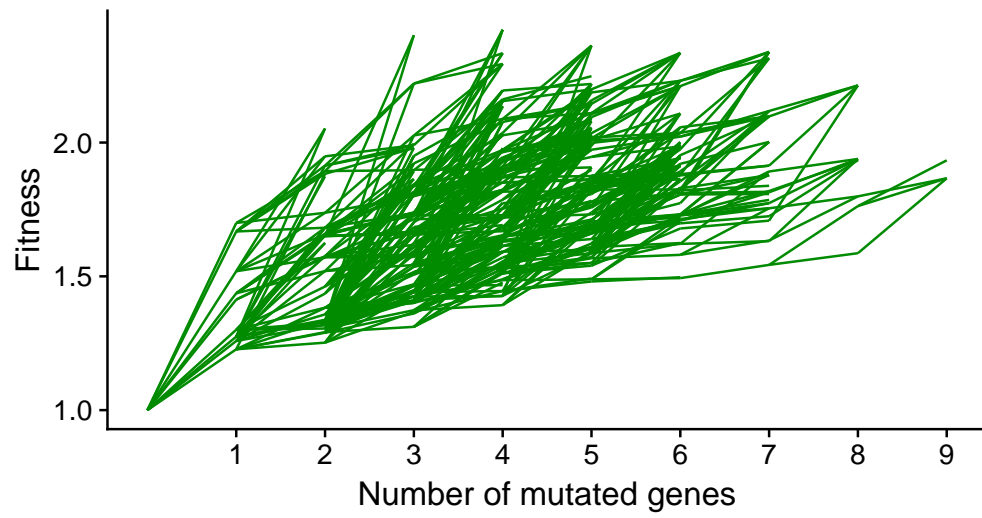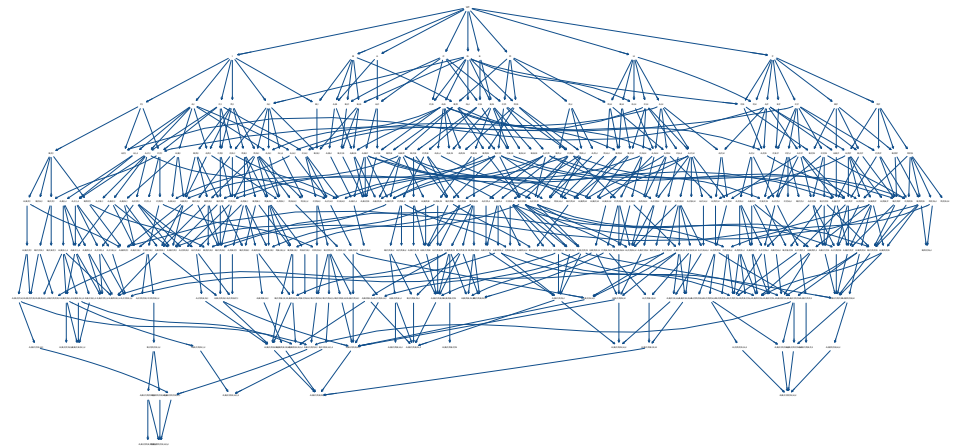

ID **qjw3nSX8uOEX3EE2**  
 acc genotypes **123**  
 peaks no back **37**  
 removed edges **NA**  
 prop rem edges **NA**

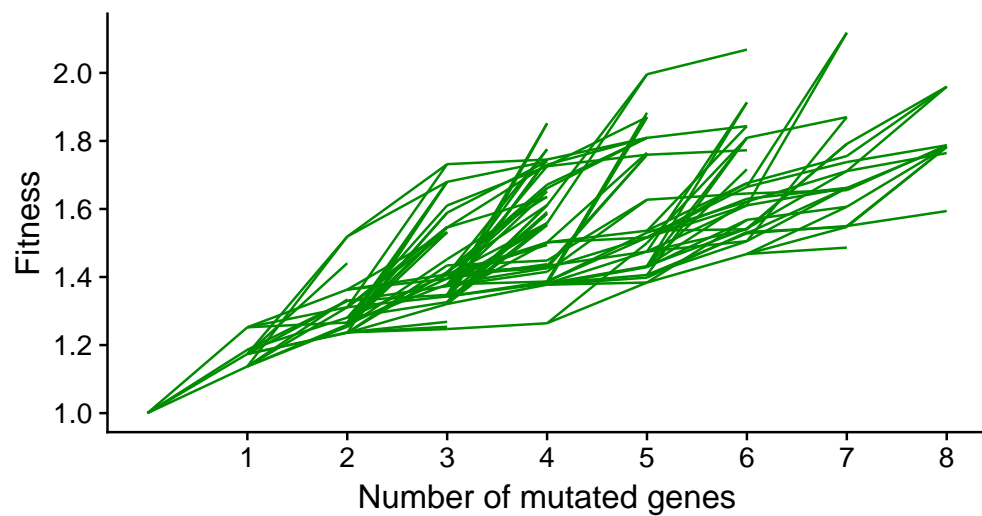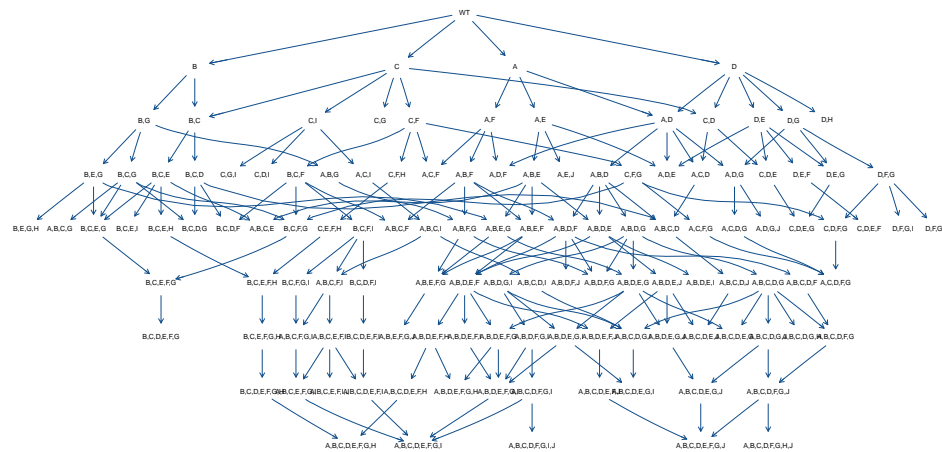

ID QLvp54fgddHiWuDQ  
acc genotypes 365  
peaks no back 92  
removed edges NA  
prop rem edges NA

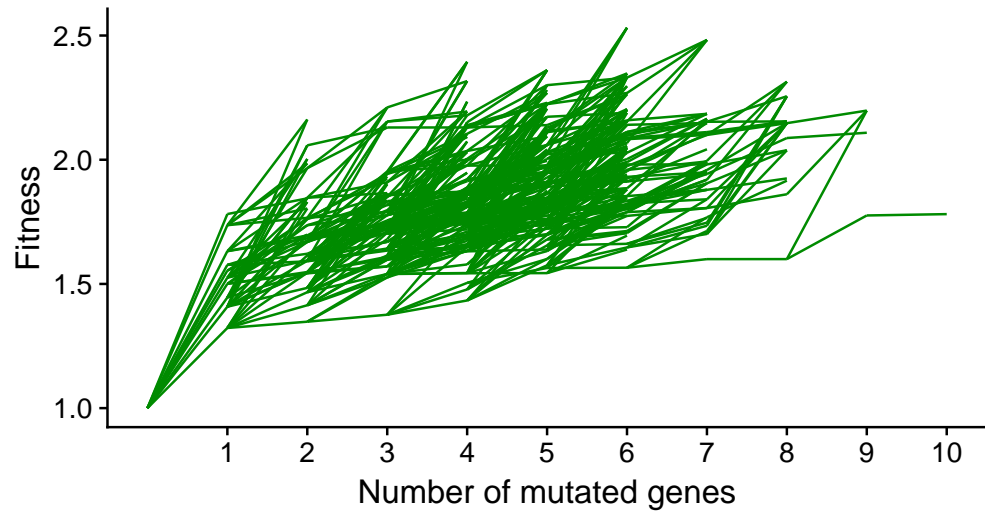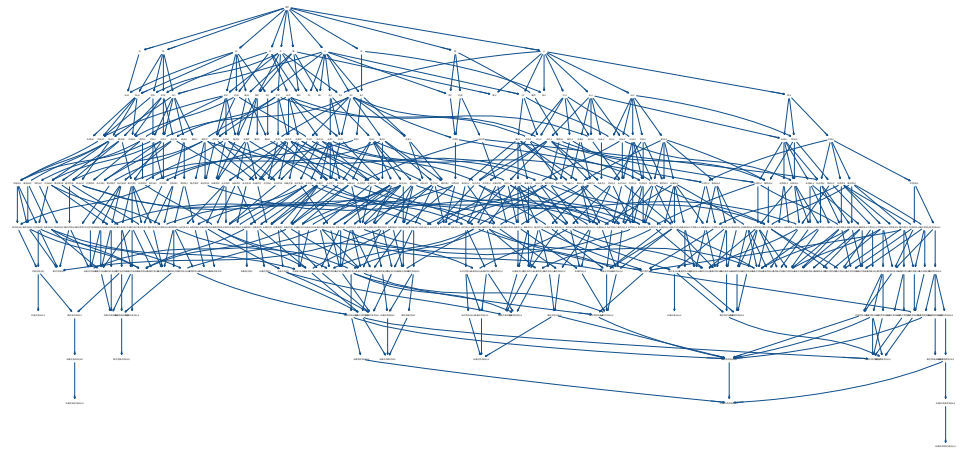

ID R1rRFK7kvGTL7JOu  
 acc genotypes 95  
 peaks no back 39  
 removed edges NA  
 prop rem edges NA

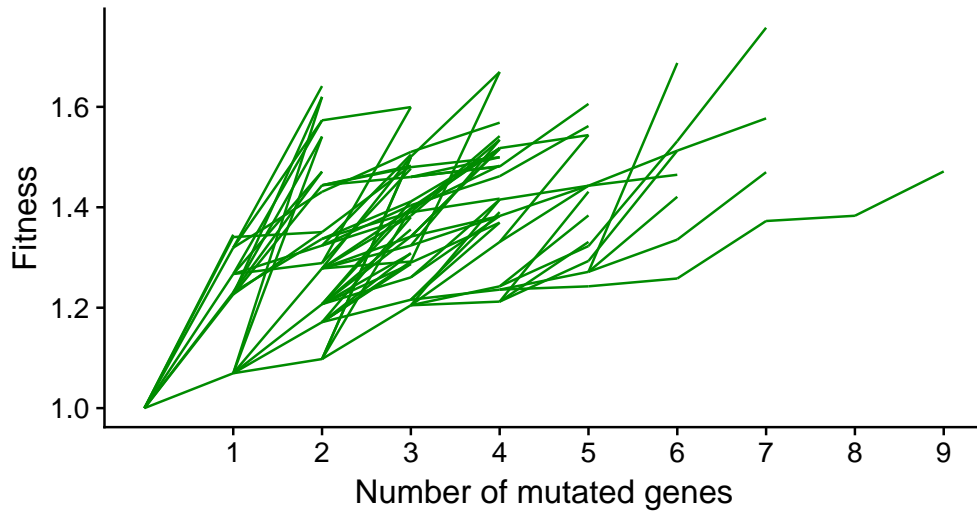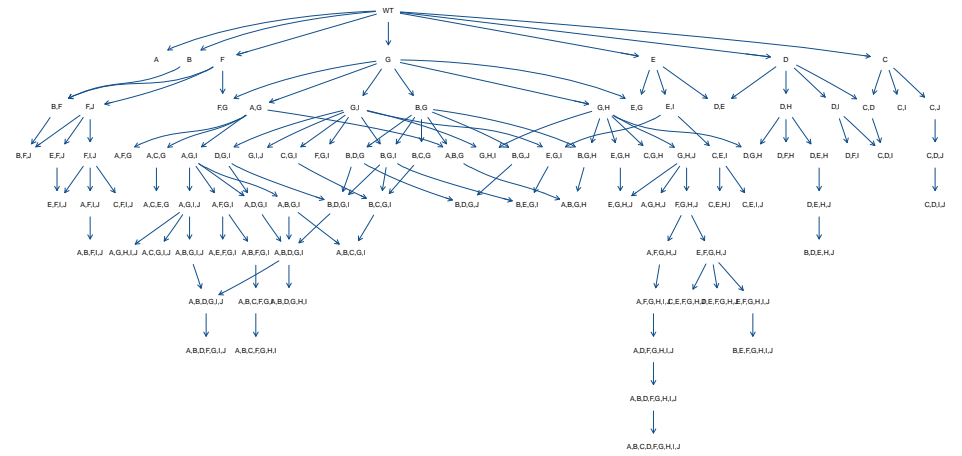

ID [r8ycAloMMwveO7jh](#)  
acc genotypes 474  
peaks no back 56  
removed edges NA  
prop rem edges NA

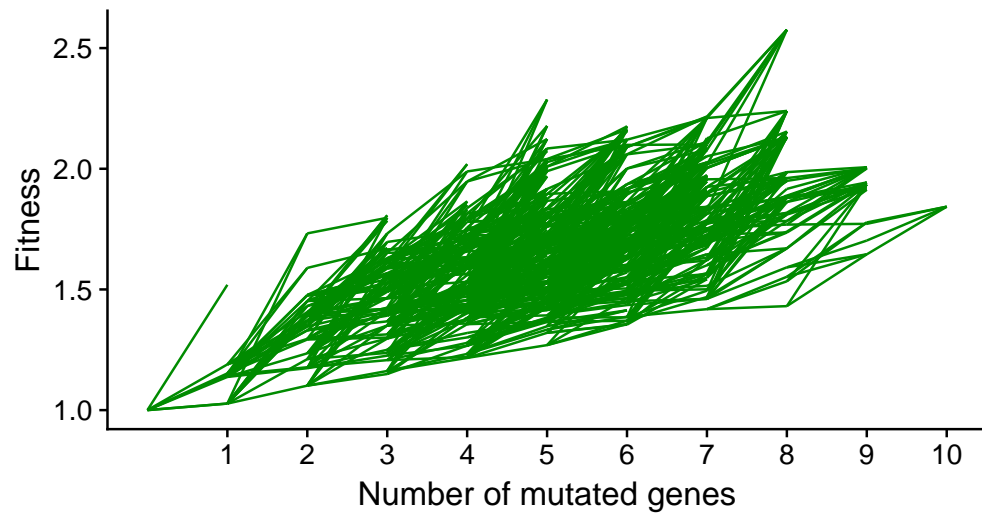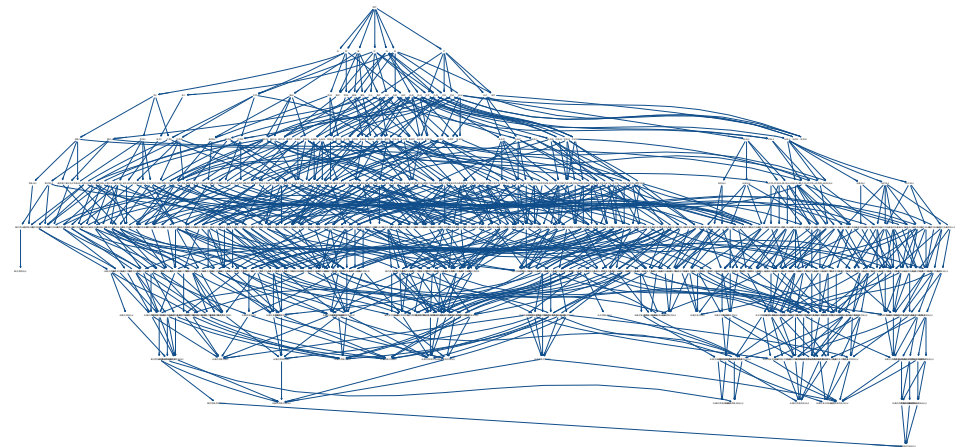



*ID* rFXDokDyxb54xE8l  
*acc genotypes* 267  
*peaks no back* 95  
*removed edges* NA  
*prop rem edges* NA

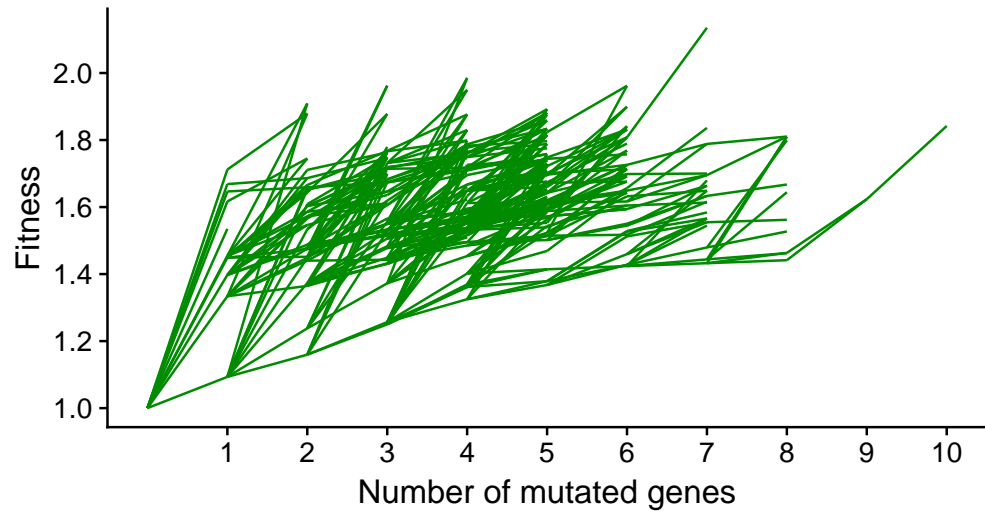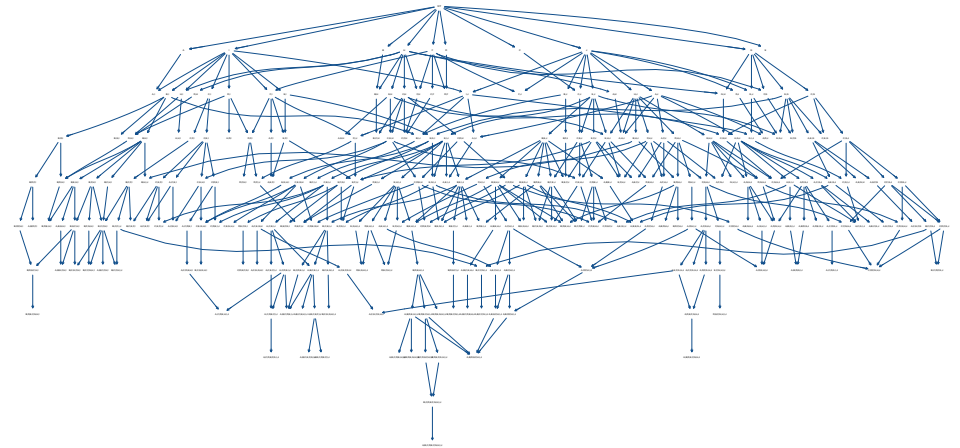

*ID* Rgbd18KZtZQm310aF  
*acc genotypes* 305  
*peaks no back* 59  
*removed edges* NA  
*prop rem edges* NA

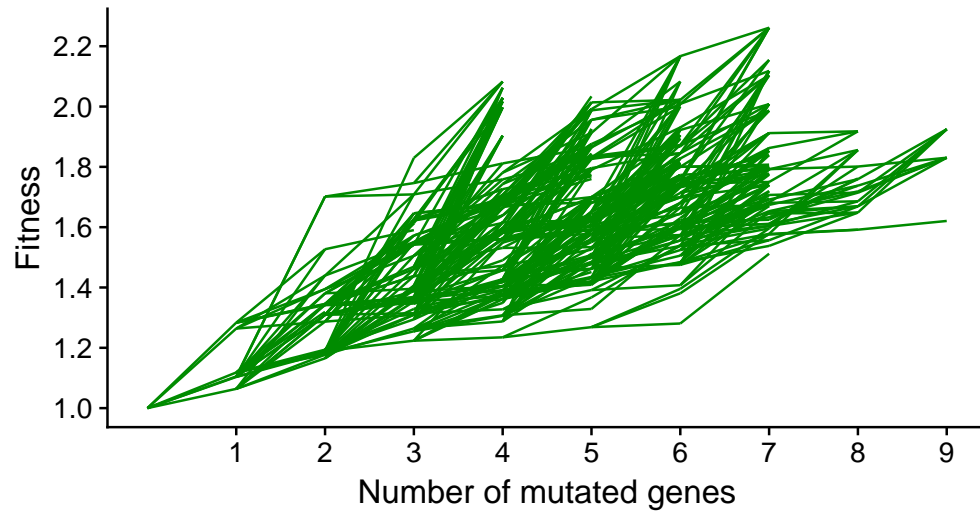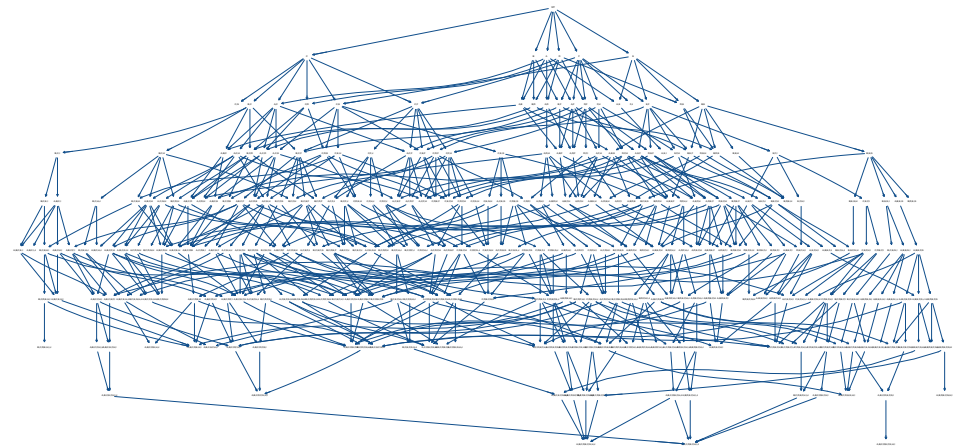

ID RgQW10wScrRmd9eE8  
 acc genotypes 65  
 peaks no back 28  
 removed edges NA  
 prop rem edges NA

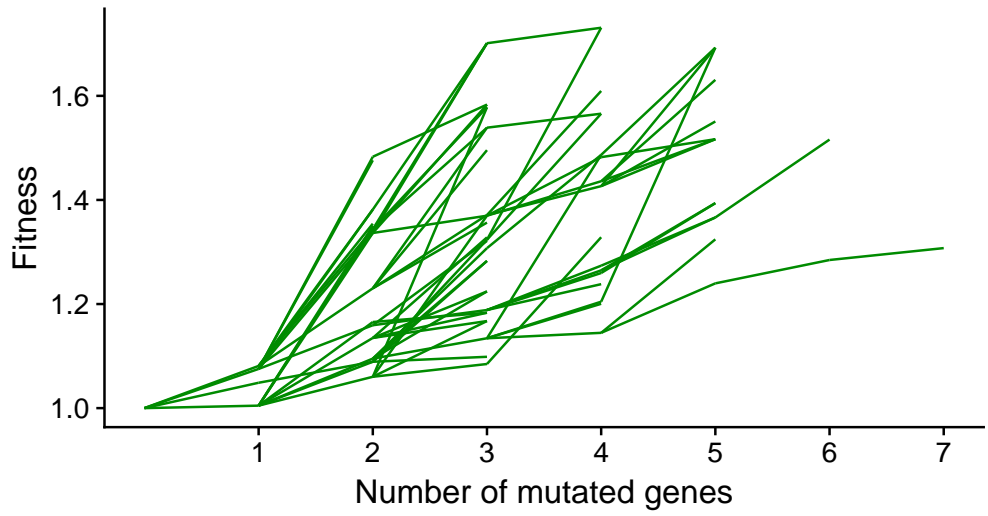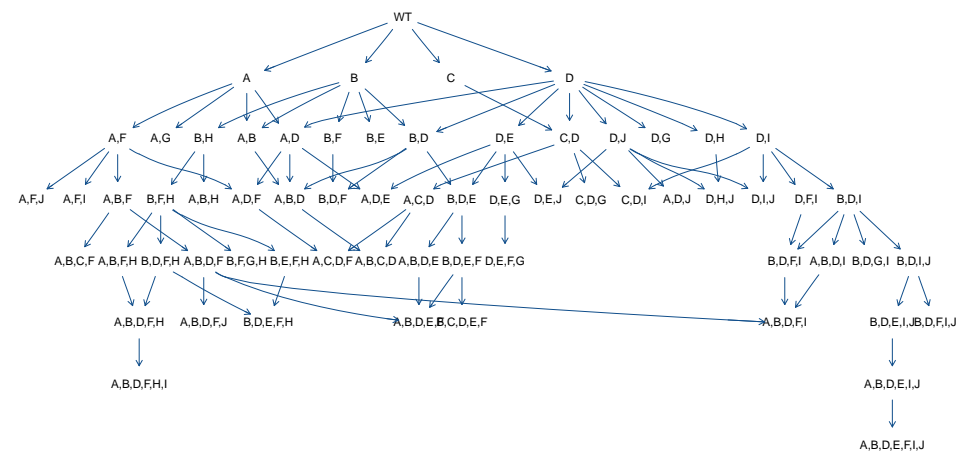

ID RM1oRnvkQ74p10MYi  
acc genotypes 211  
peaks no back 85  
removed edges NA  
prop rem edges NA

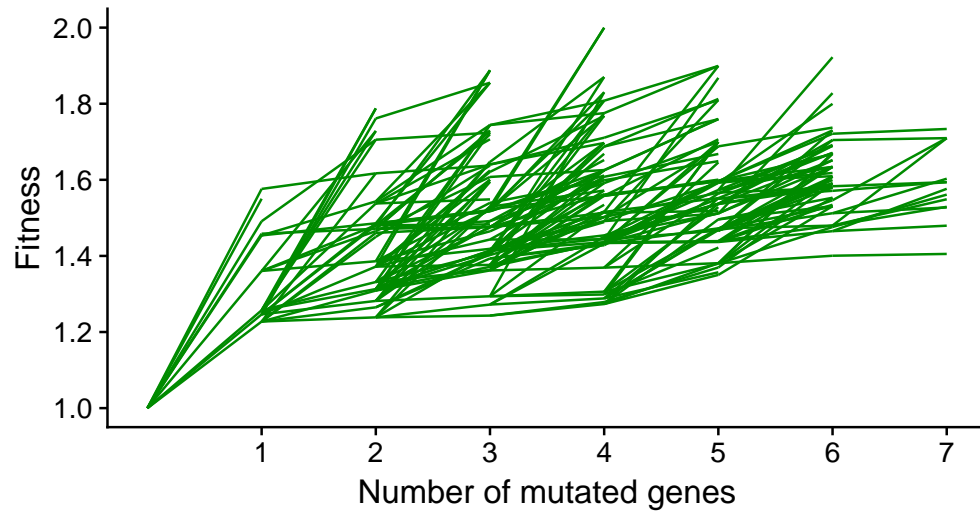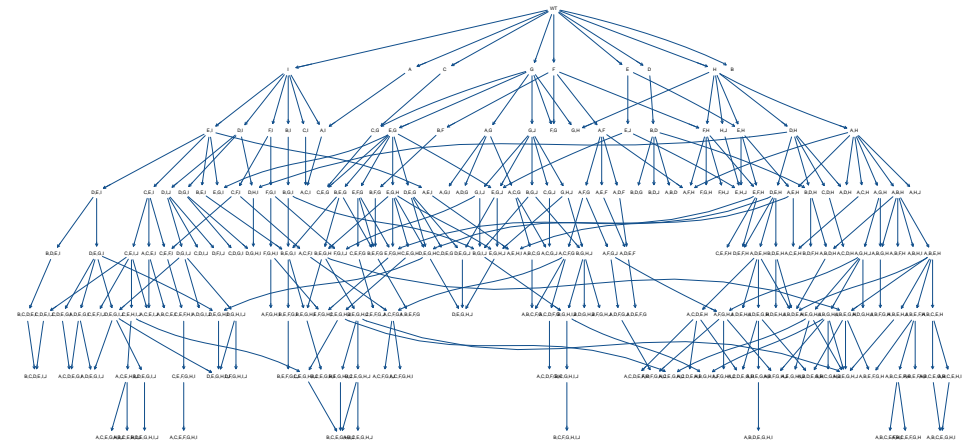



ID **siB10Dc3bBqHdWLSu**  
acc genotypes **152**  
peaks no back 59  
removed edges NA  
prop rem edges NA

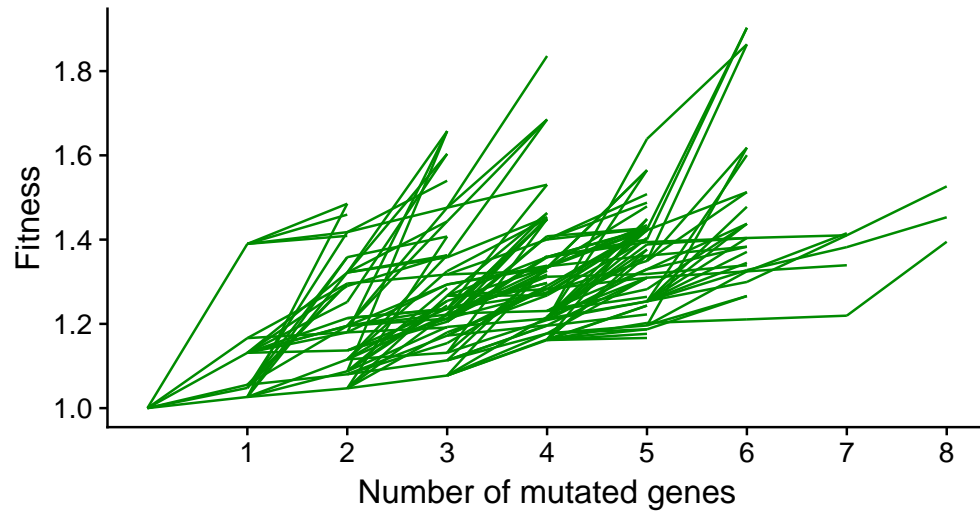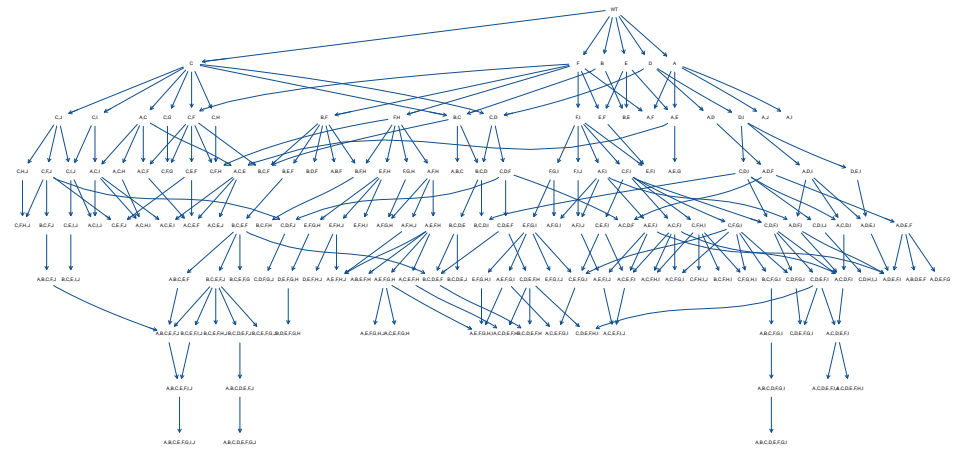

ID SkrmpMeOx2A5Xljs  
 acc genotypes 41  
 peaks no back 14  
 removed edges NA  
 prop rem edges NA

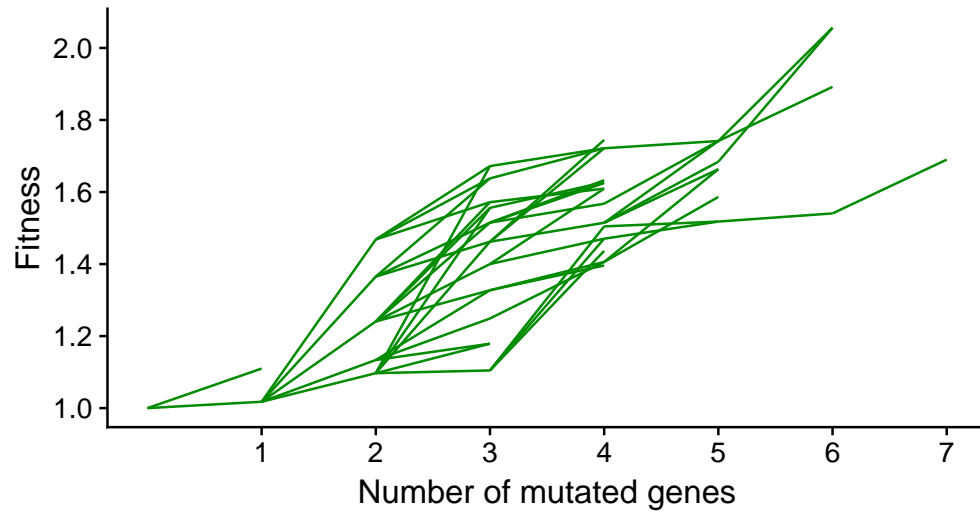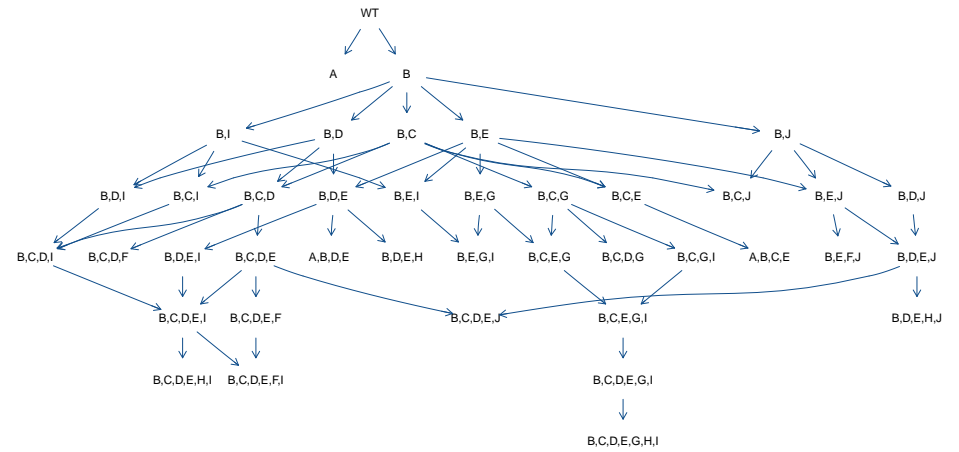

ID sKV2JzX6hoi6ZXJ  
acc genotypes 302  
peaks no back 68  
removed edges NA  
prop rem edges NA

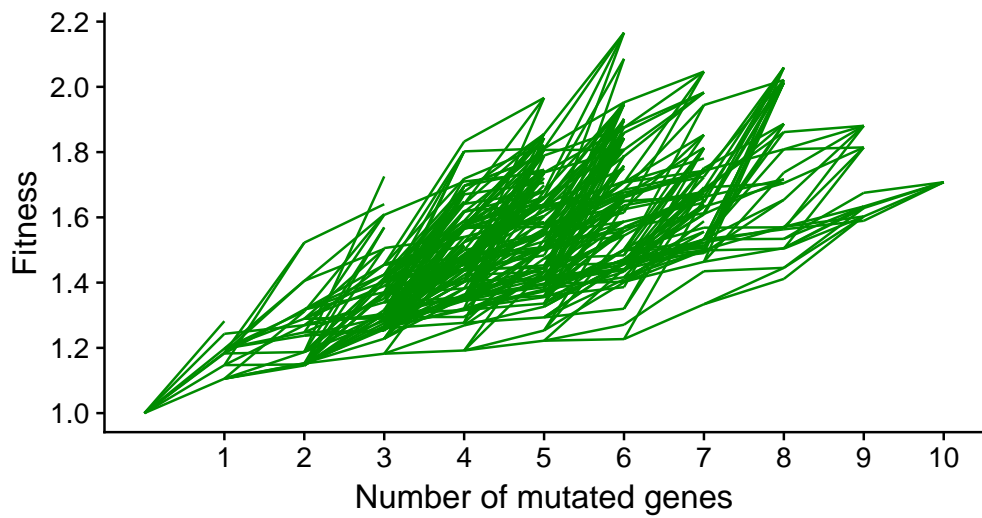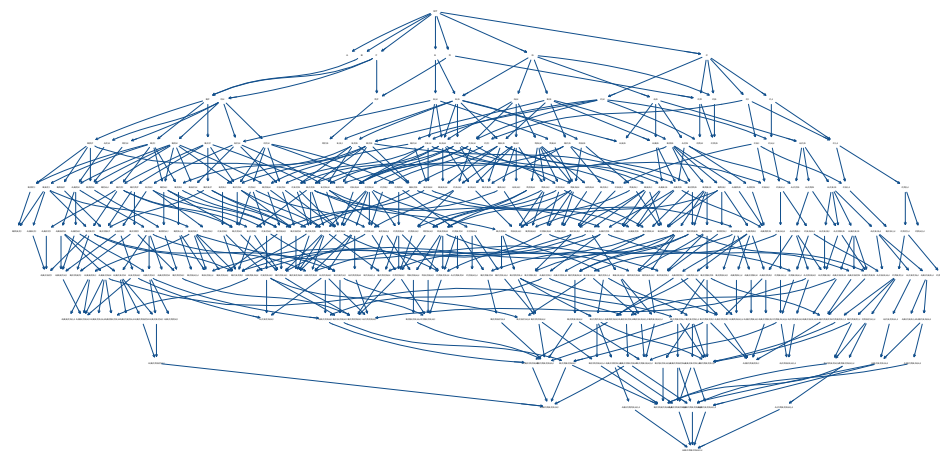



*ID* SRQPFRnma8vPJxWK  
*acc genotypes* 327  
*peaks no back* 103  
*removed edges* NA  
*prop rem edges* NA

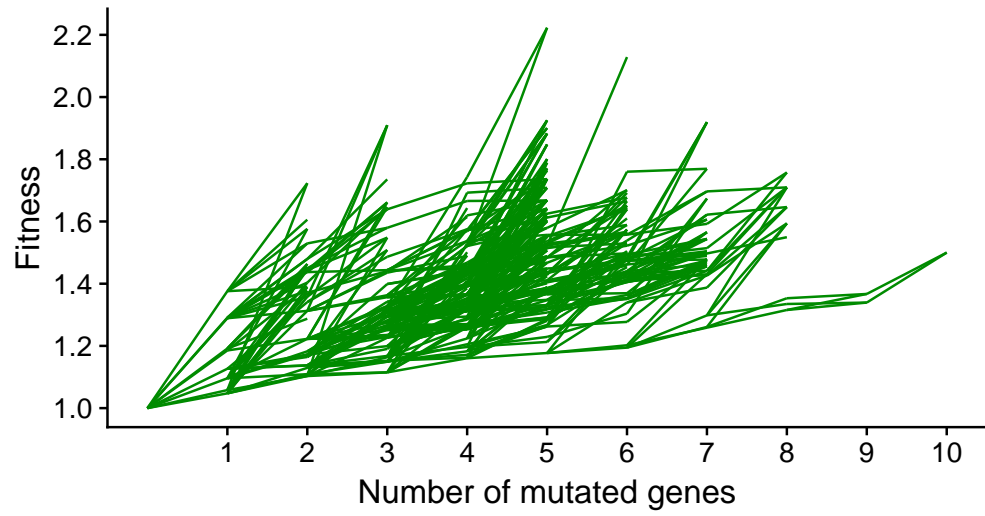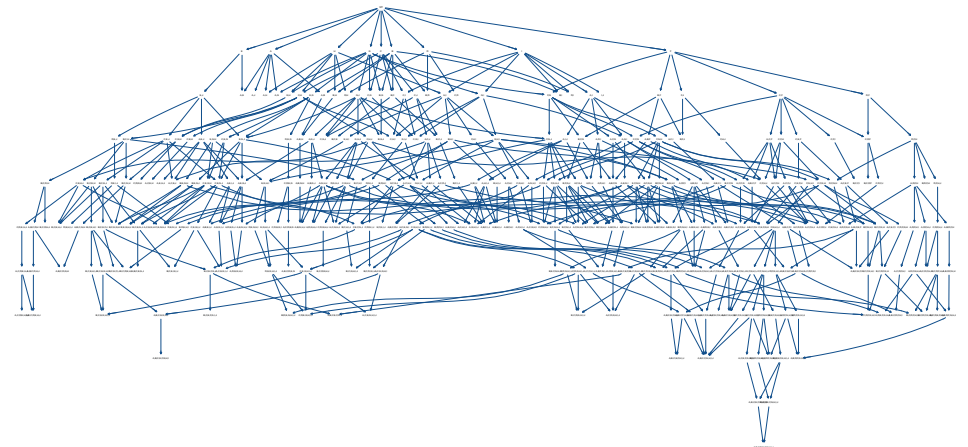

ID suRv8SDkQ3Fspdke  
acc genotypes 330  
peaks no back 113  
removed edges NA  
prop rem edges NA

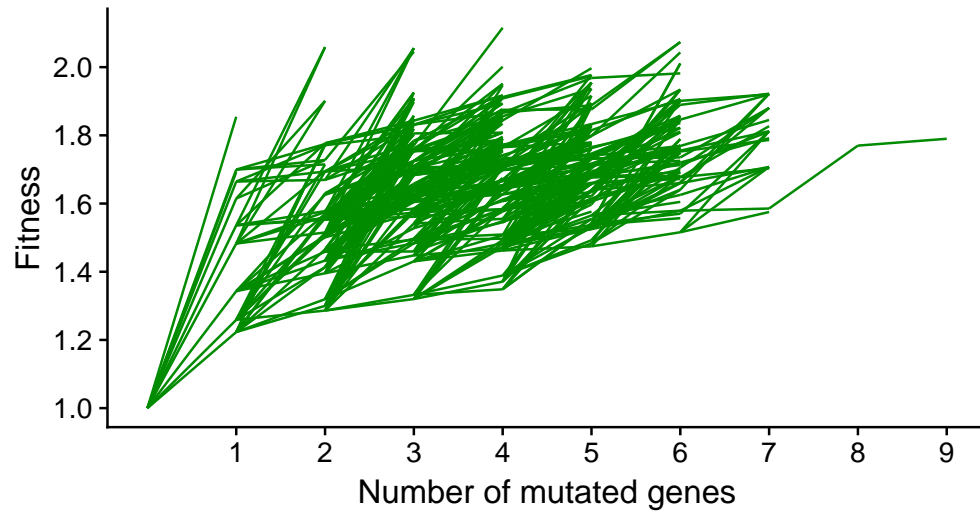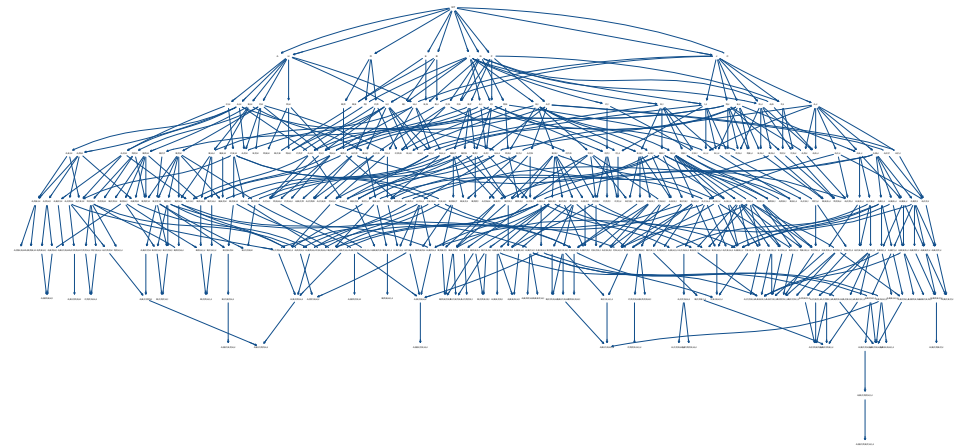



ID T1g10UC4ysvdG1vj  
 acc genotypes 75  
 peaks no back 31  
 removed edges NA  
 prop rem edges NA

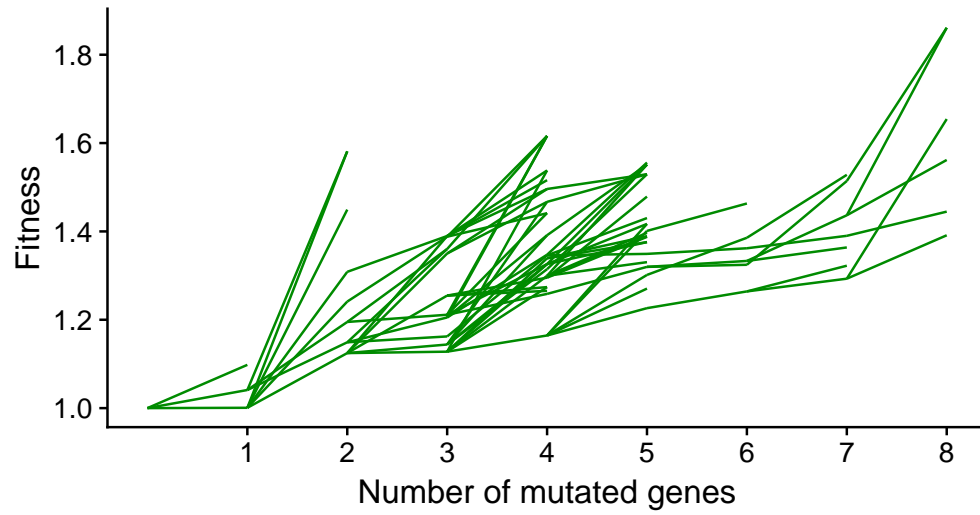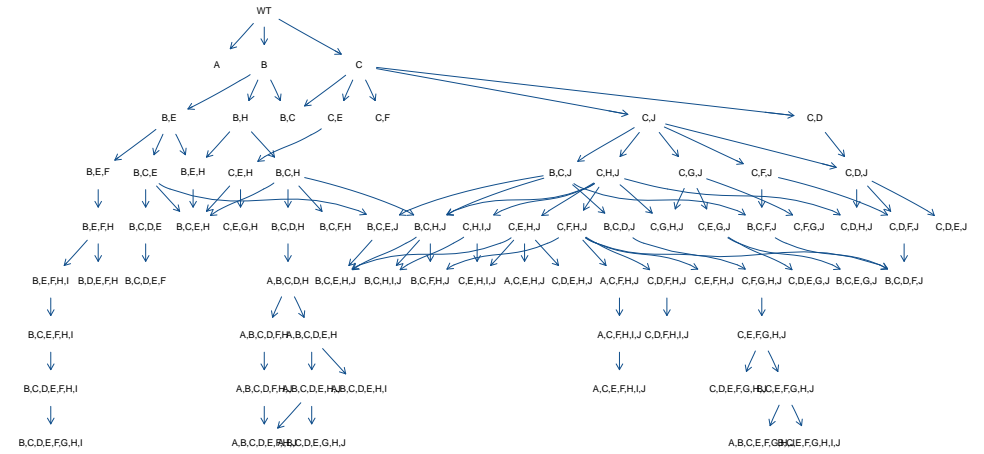

ID T5oZEwzVo6JyuGLW  
 acc genotypes 125  
 peaks no back 52  
 removed edges NA  
 prop rem edges NA

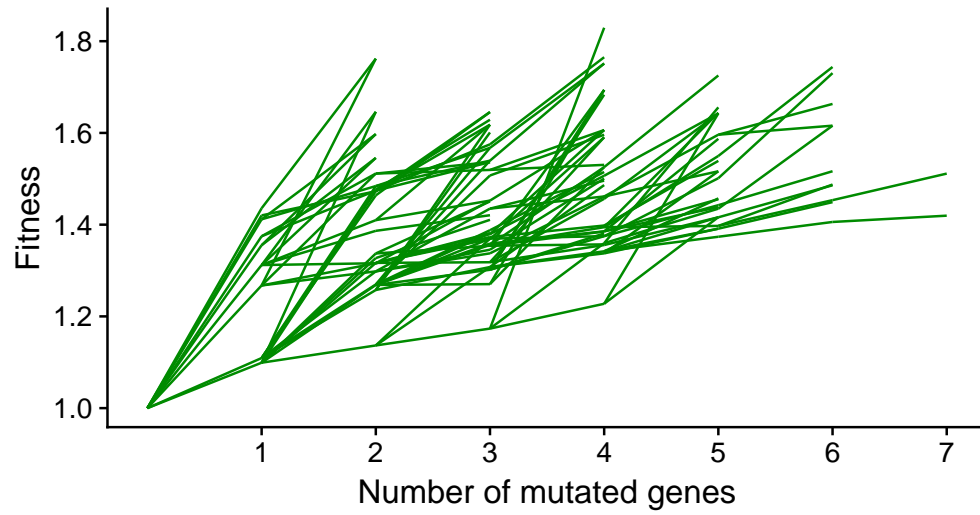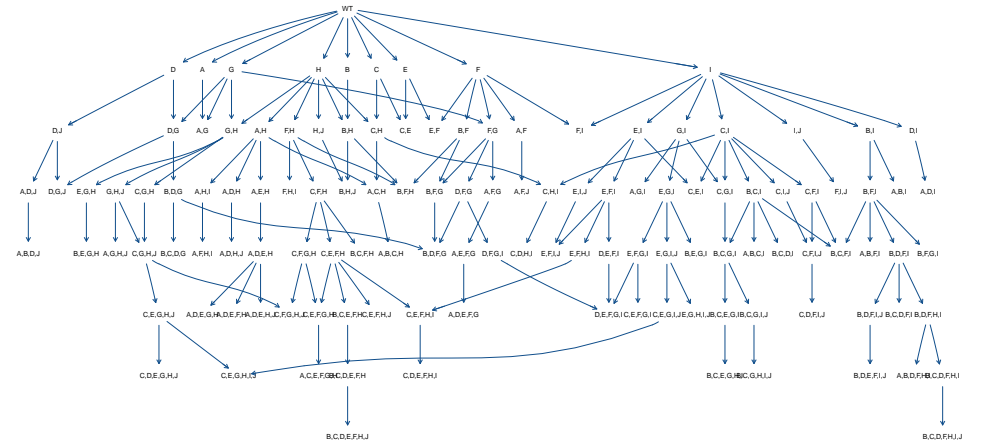

ID Tklr7flyal9UtU86  
acc genotypes 142  
peaks no back 60  
removed edges NA  
prop rem edges NA

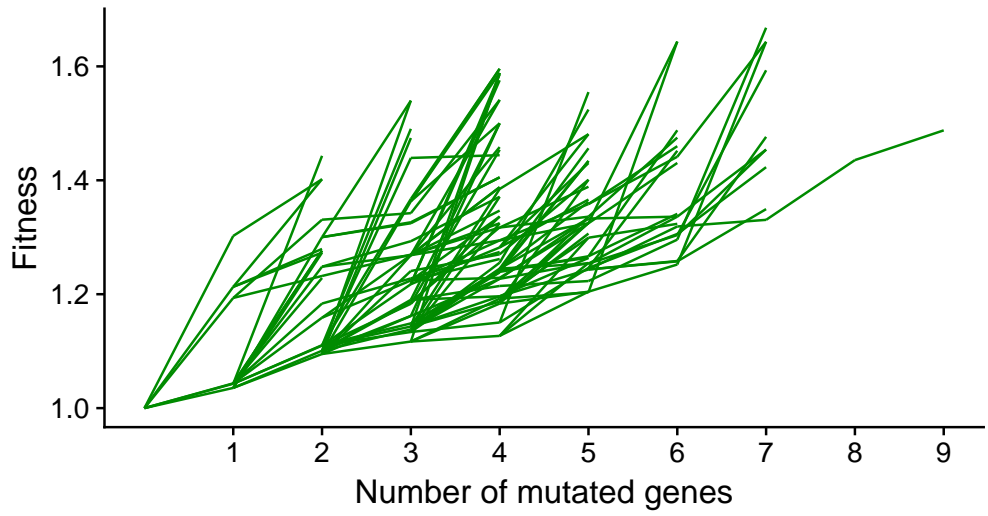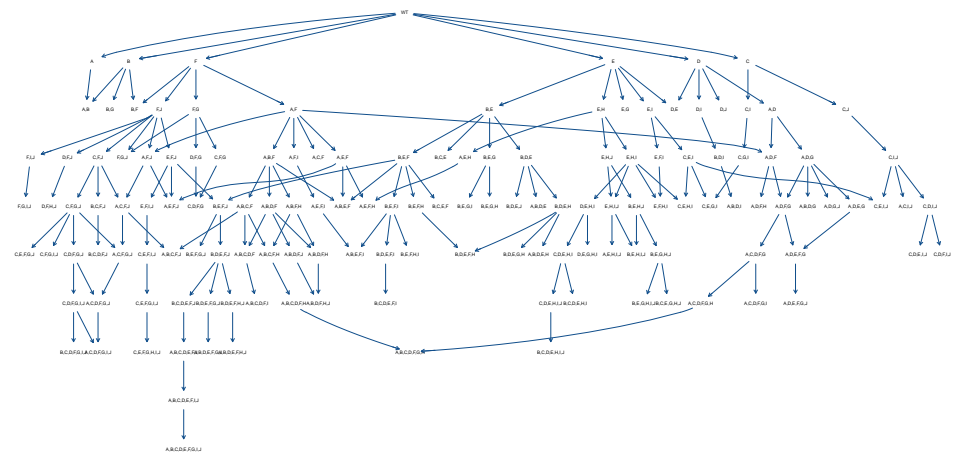

ID tkkGKUAR1sBTETkR  
acc genotypes 209  
peaks no back 70  
removed edges NA  
prop rem edges NA

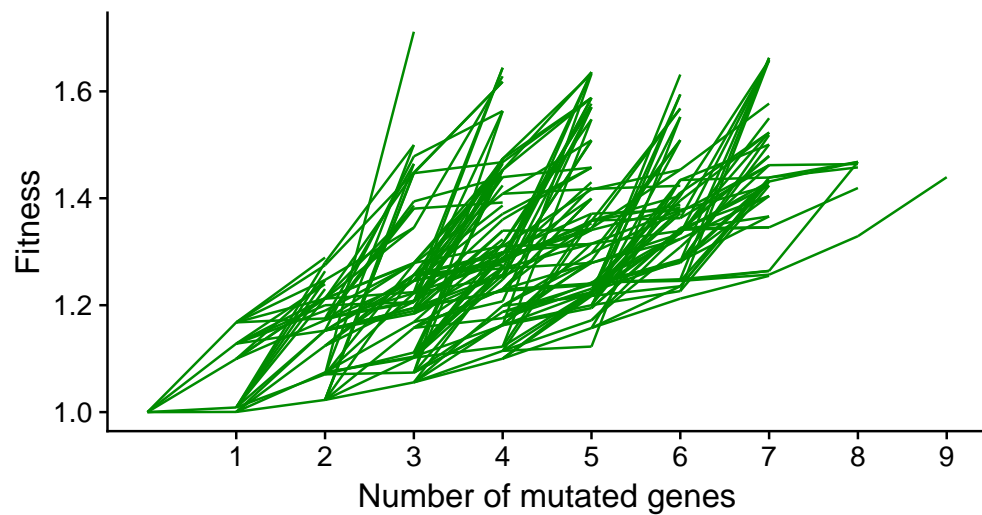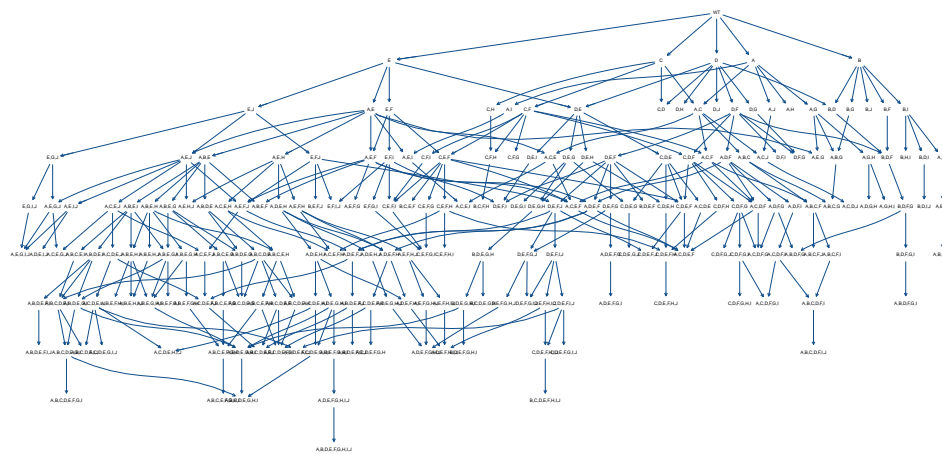

ID [tyHTZO351lxuXhpp](#)  
acc genotypes 173  
peaks no back 40  
removed edges NA  
prop rem edges NA

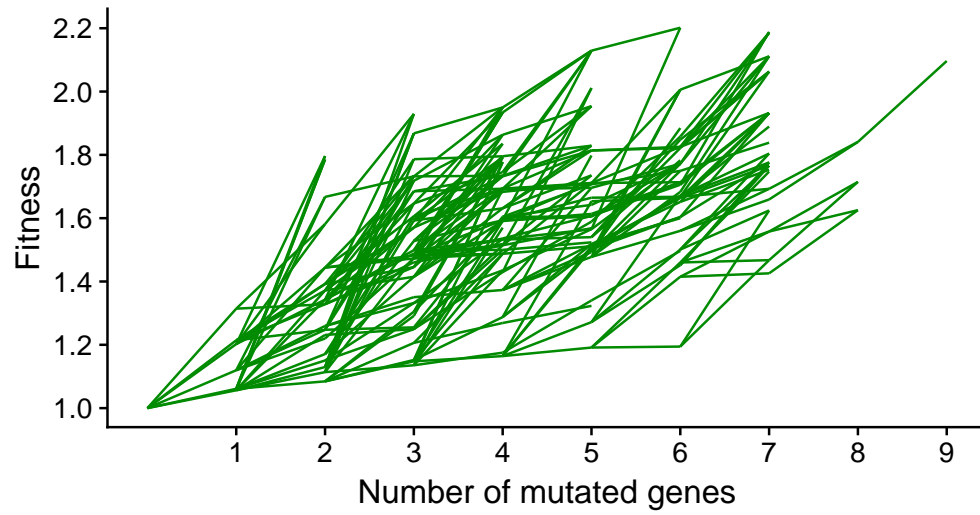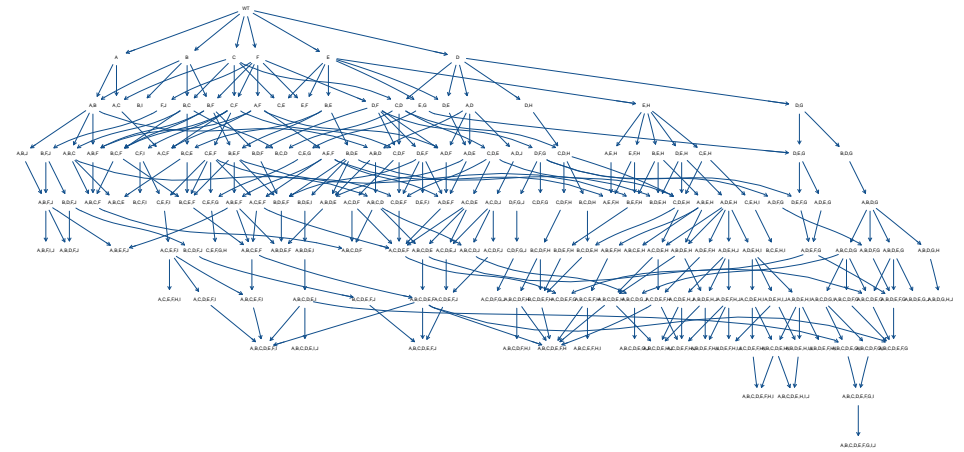



*ID* u4QnEyMMh8u2Dmoq  
*acc genotypes* 302  
*peaks no back* 82  
*removed edges* NA  
*prop rem edges* NA

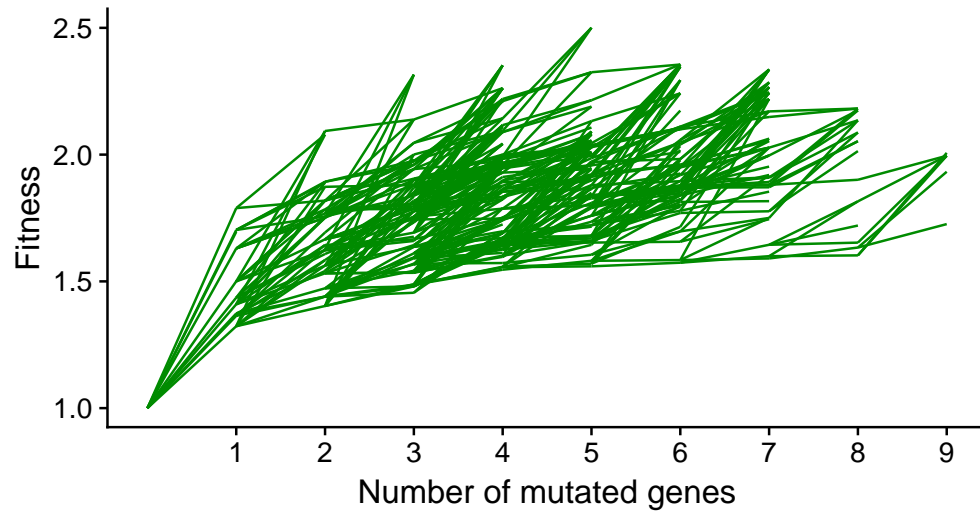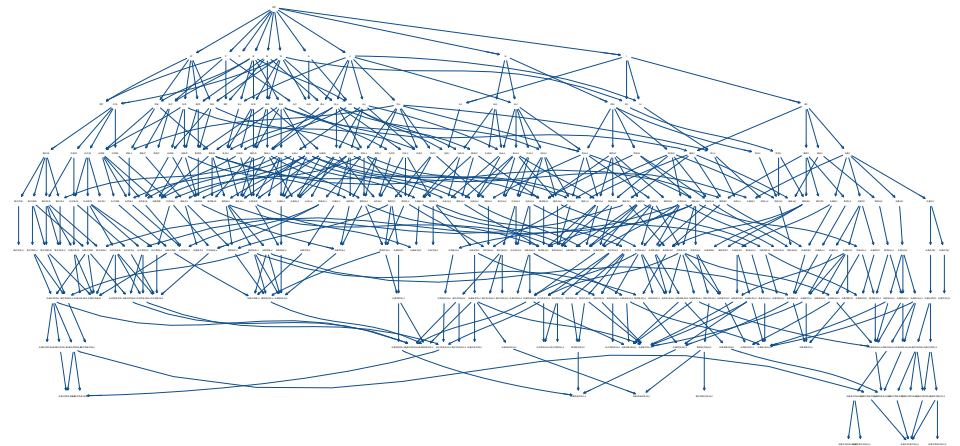

ID u6D56PFLKLEytlrF  
acc genotypes 243  
peaks no back 53  
removed edges NA  
prop rem edges NA

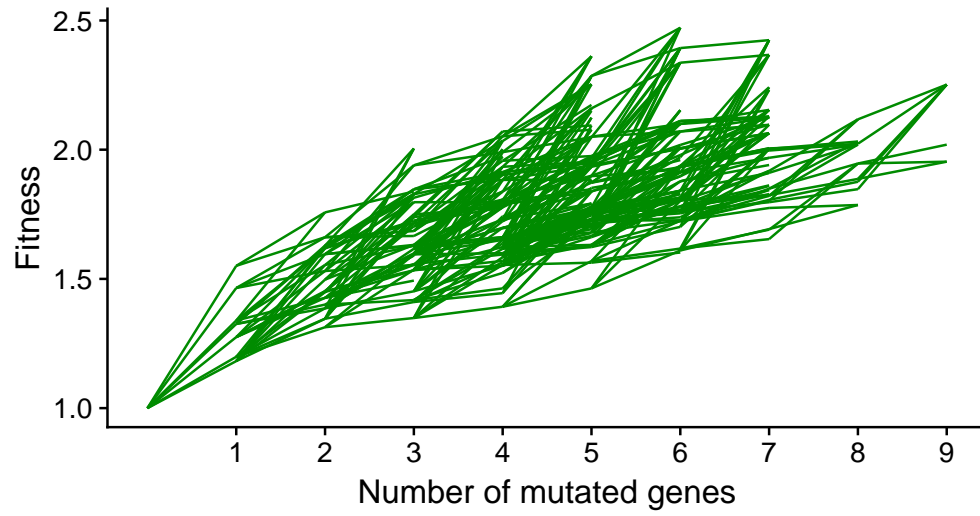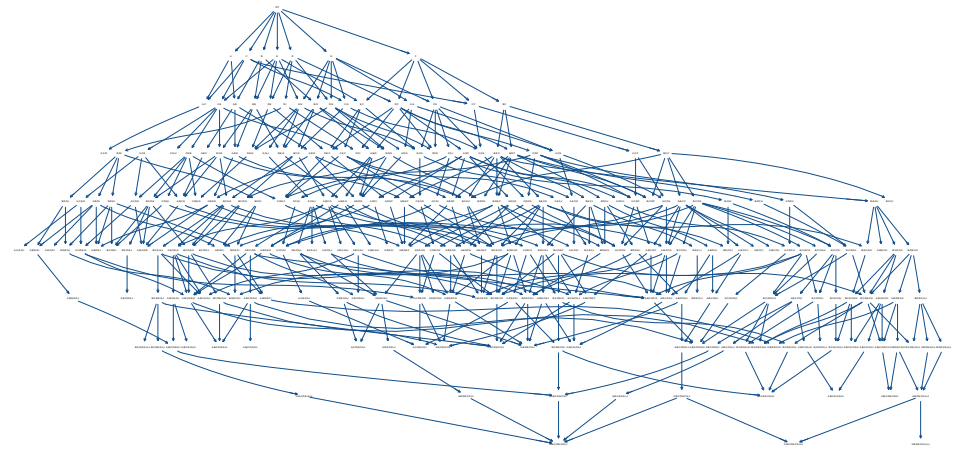

ID u8aziQ10mxkwi2VPc  
 acc genotypes 57  
 peaks no back 19  
 removed edges NA  
 prop rem edges NA

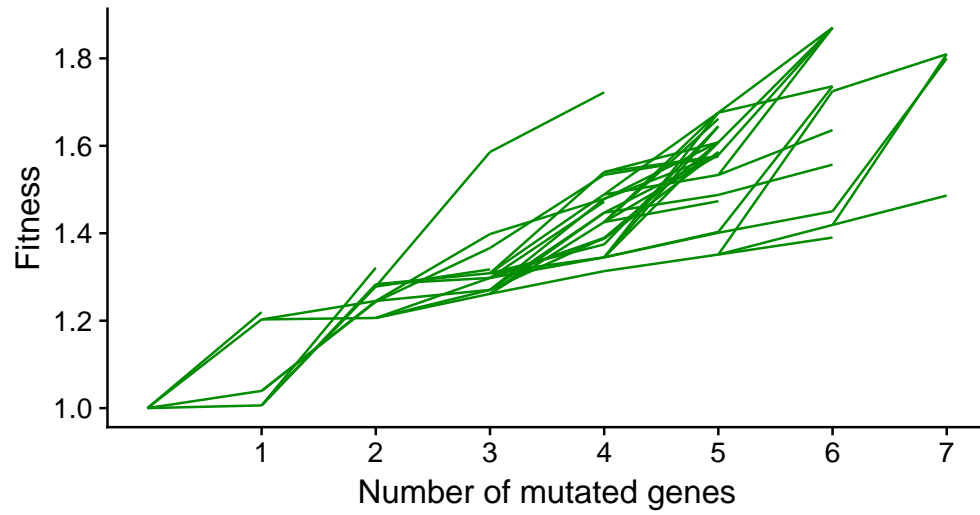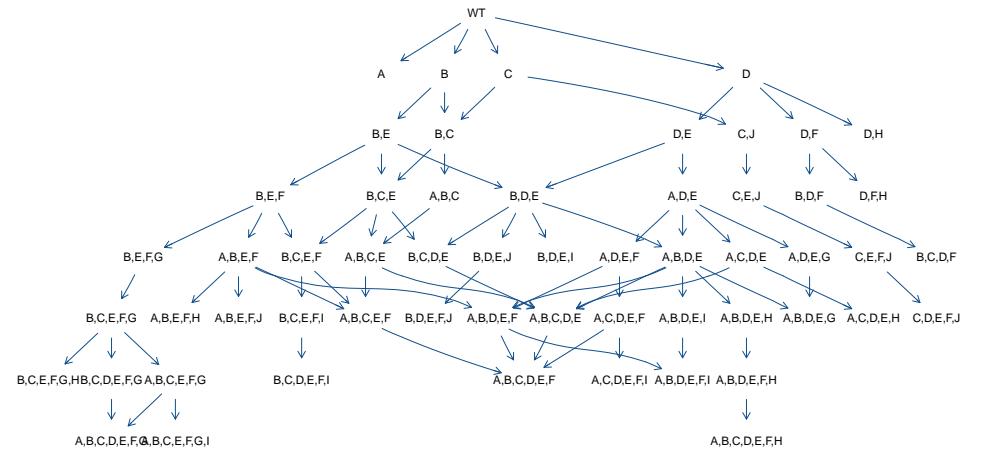

ID U9tKbeEaFO915pcB  
 acc genotypes 151  
 peaks no back 66  
 removed edges NA  
 prop rem edges NA

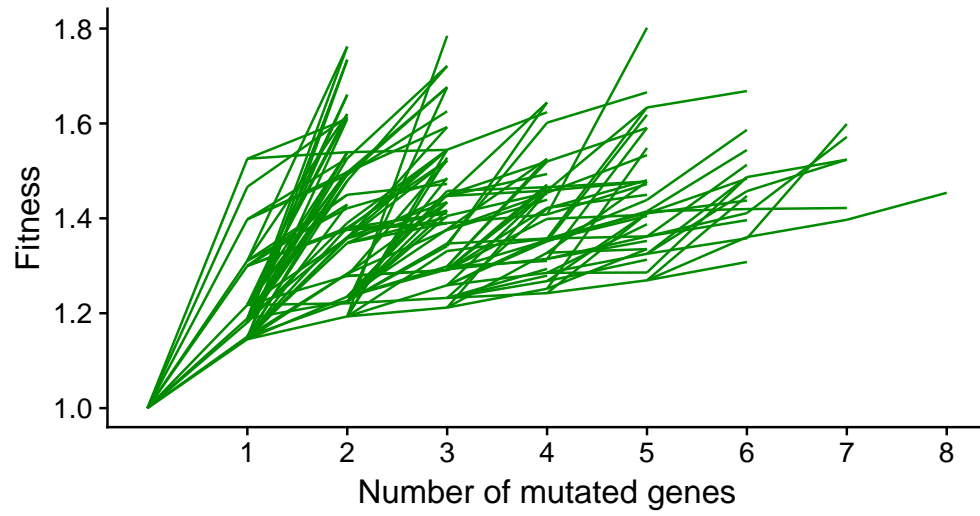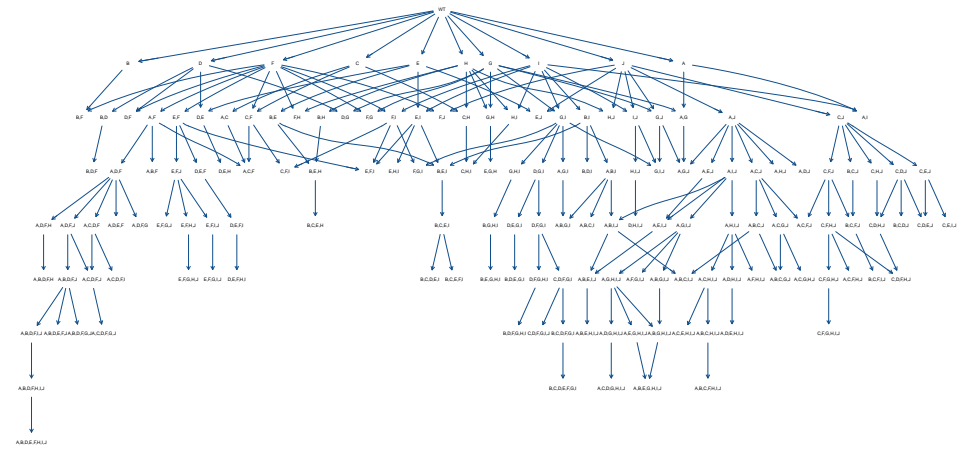

*ID* uaHRvH1XC9BScLS5  
*acc genotypes* 333  
*peaks no back* 60  
*removed edges* NA  
*prop rem edges* NA

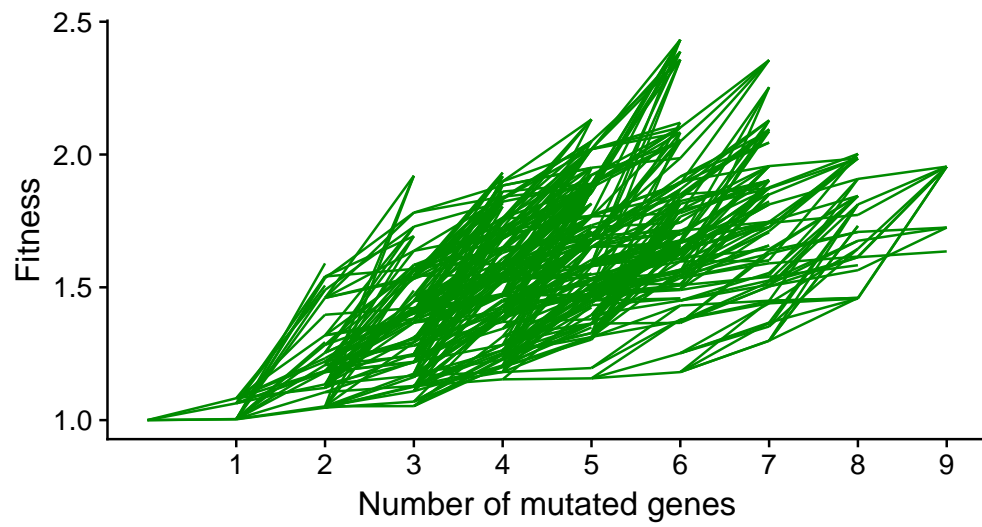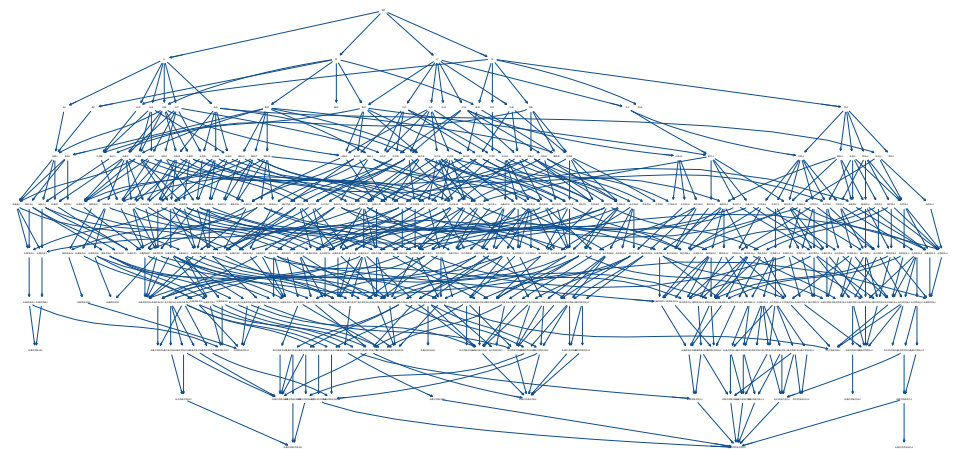

ID UdzVbWbljfForTa  
acc genotypes 206  
peaks no back 78  
removed edges NA  
prop rem edges NA

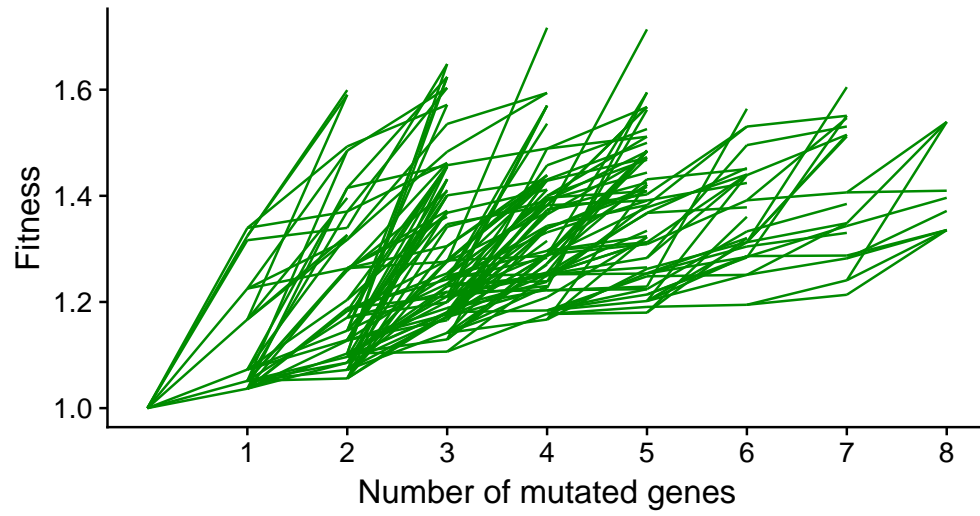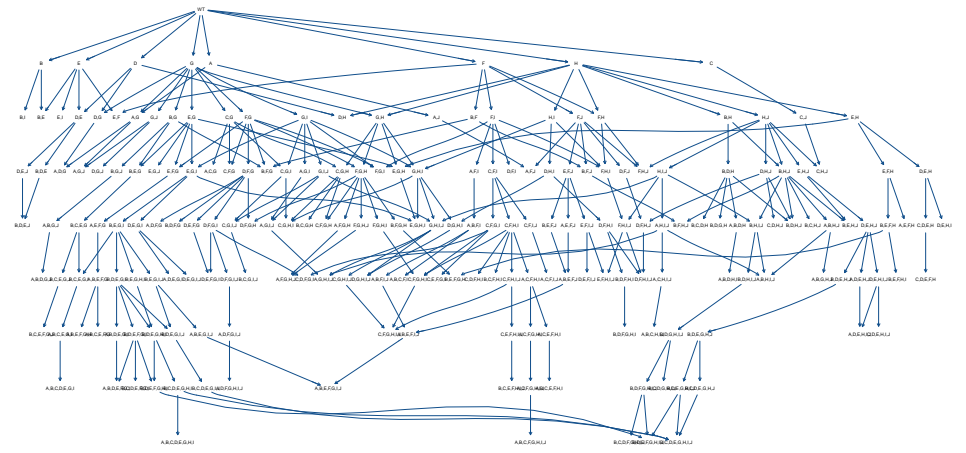

ID Ug5ffs10lfz6uMbgO  
acc genotypes 225  
peaks no back 65  
removed edges NA  
prop rem edges NA

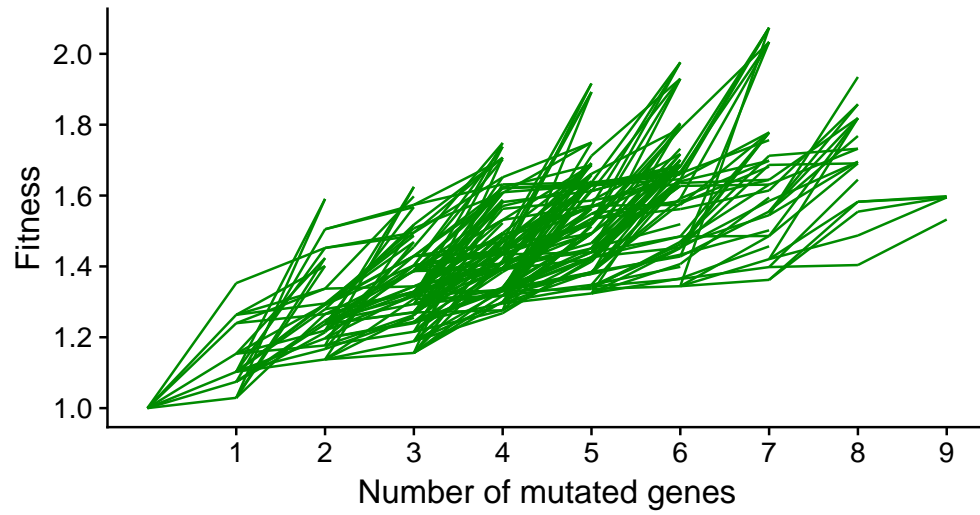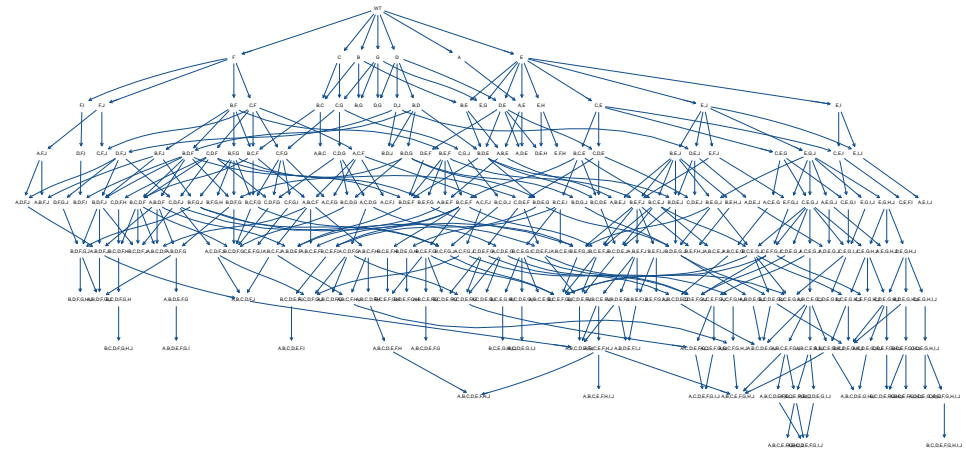

ID UmunqSzUuUKy8o5l  
acc genotypes 172  
peaks no back 56  
removed edges NA  
prop rem edges NA

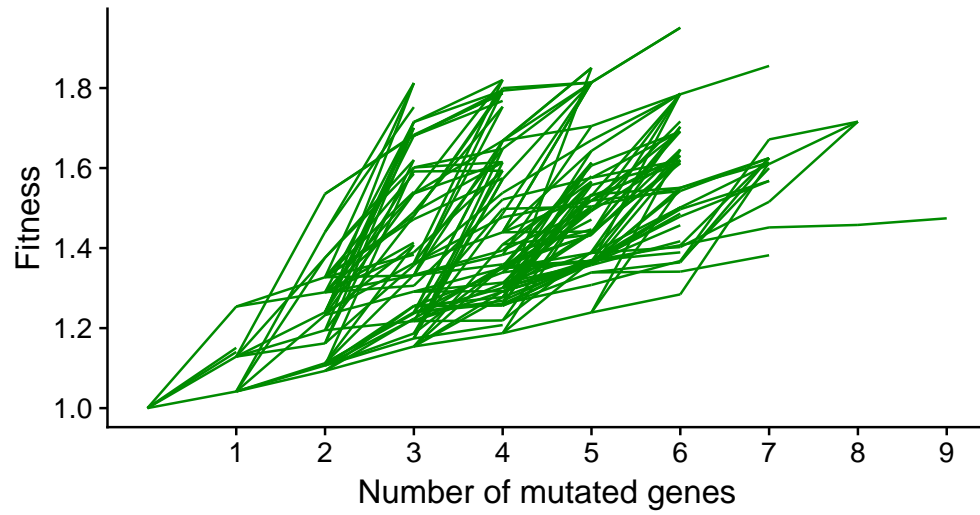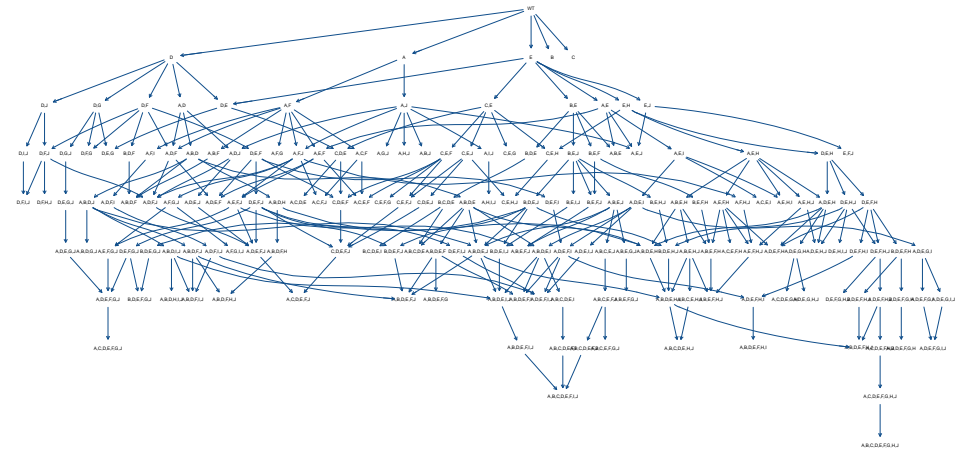



*ID* UOqyH3eyYqb108SQa  
*acc genotypes* 360  
*peaks no back* 71  
*removed edges* NA  
*prop rem edges* NA

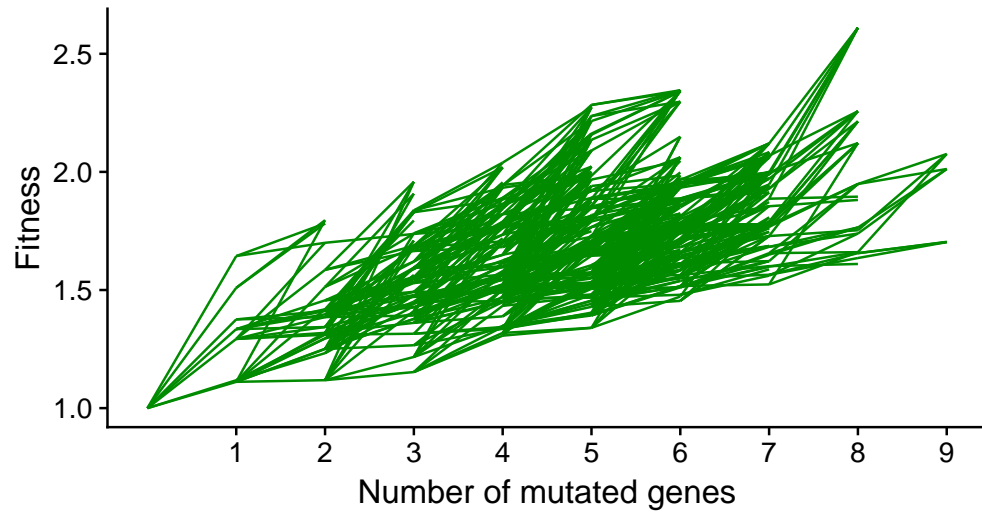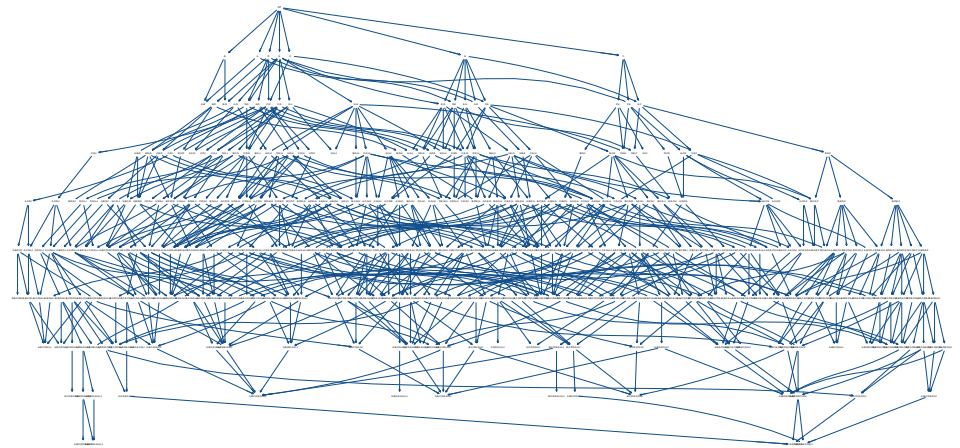

ID UpYY82ecse62Y3kB  
 acc genotypes 102  
 peaks no back 28  
 removed edges NA  
 prop rem edges NA

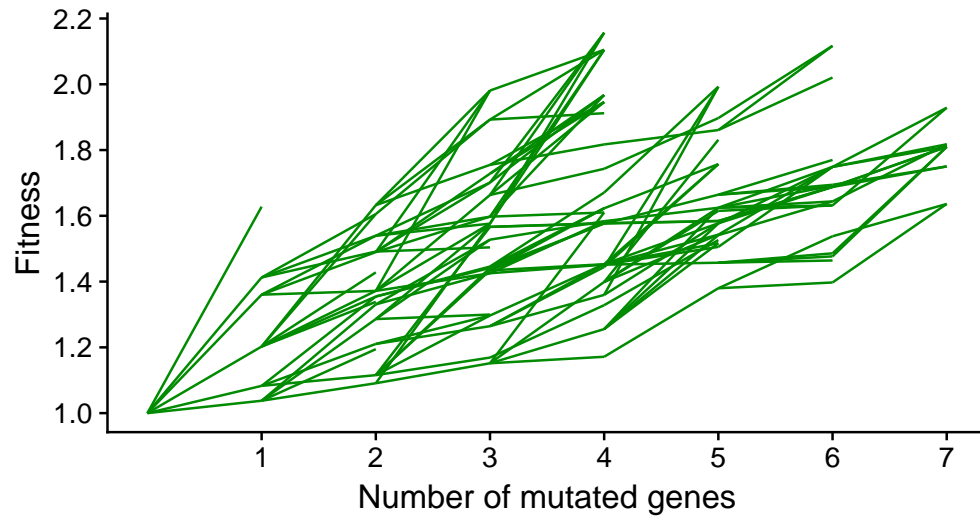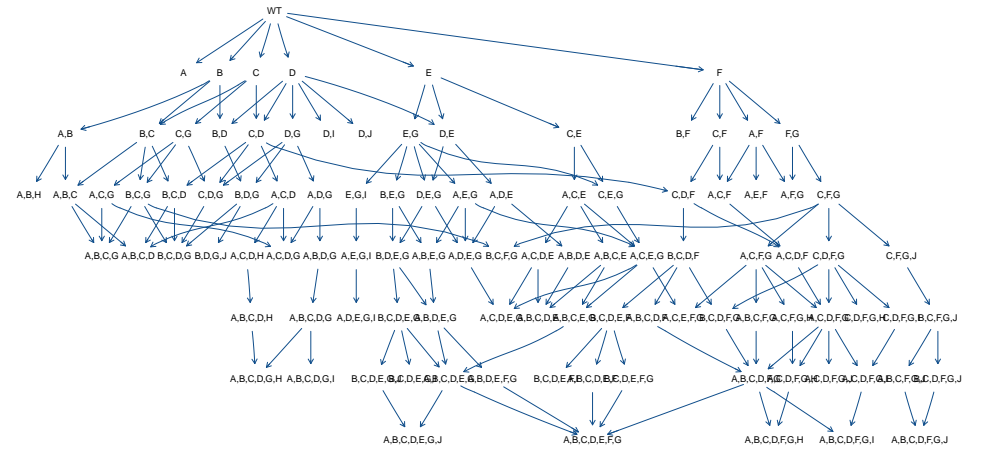

ID UR8nbozIYY5kAyVm  
acc genotypes 238  
peaks no back 54  
removed edges NA  
prop rem edges NA

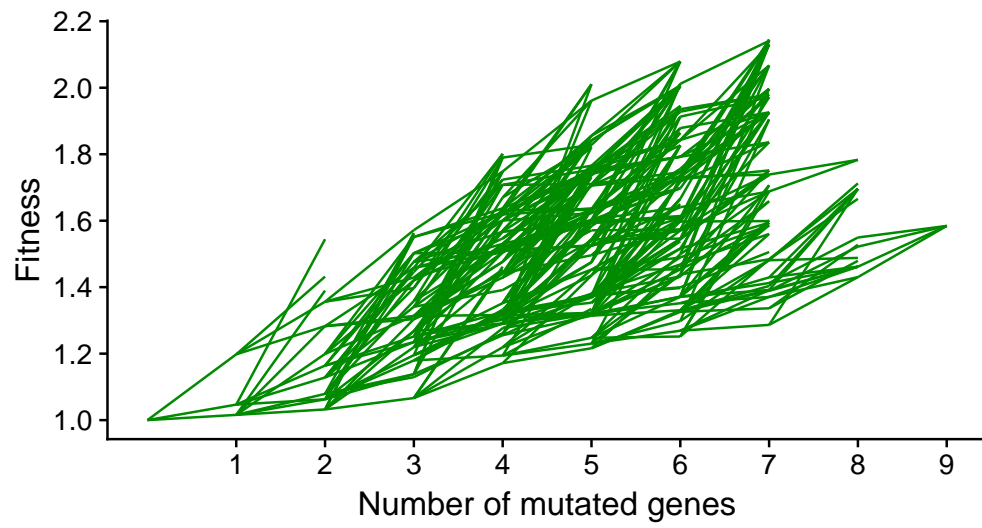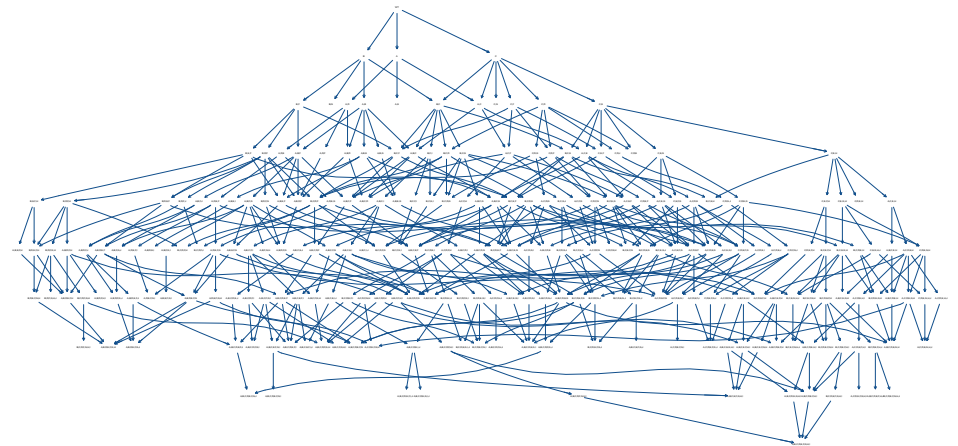

ID **vhfO10CYjBTCUd5Oc**  
acc genotypes **189**  
peaks no back 49  
removed edges NA  
prop rem edges NA

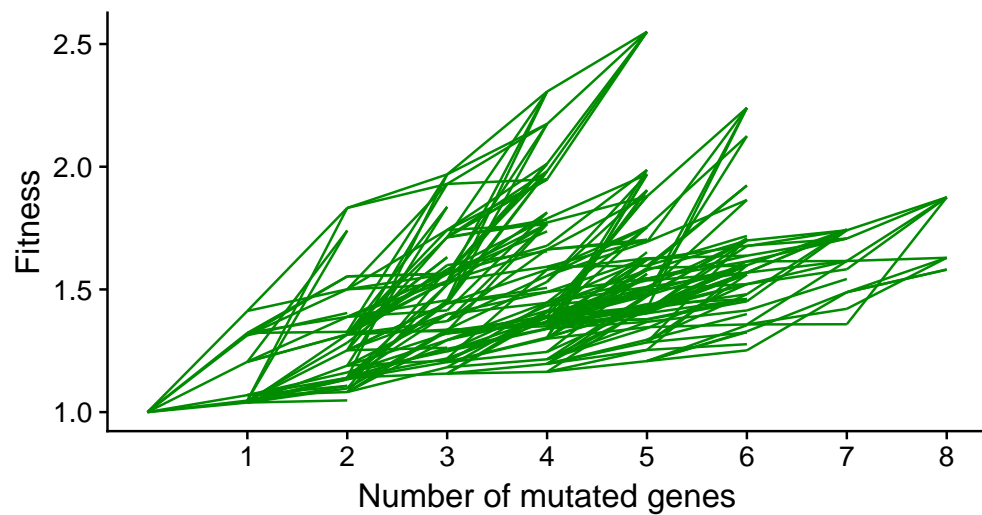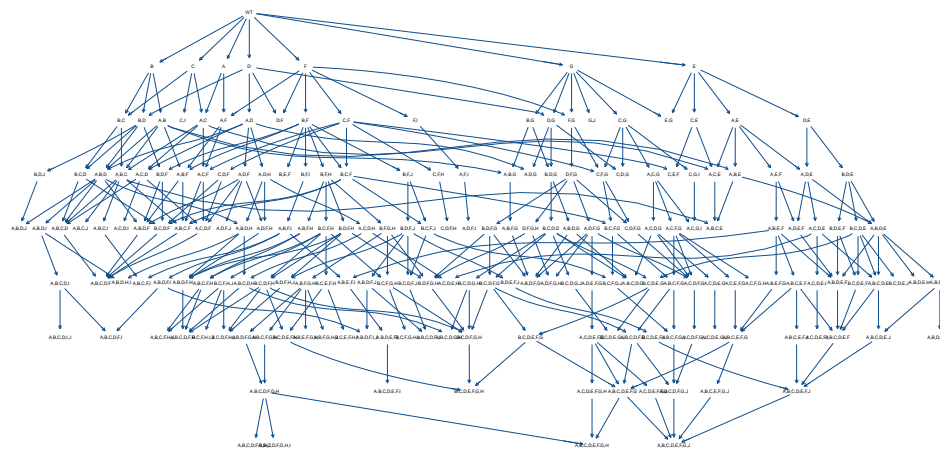

ID VLbJrKnG7tDZJCX7  
acc genotypes 738  
peaks no back 105  
removed edges NA  
prop rem edges NA

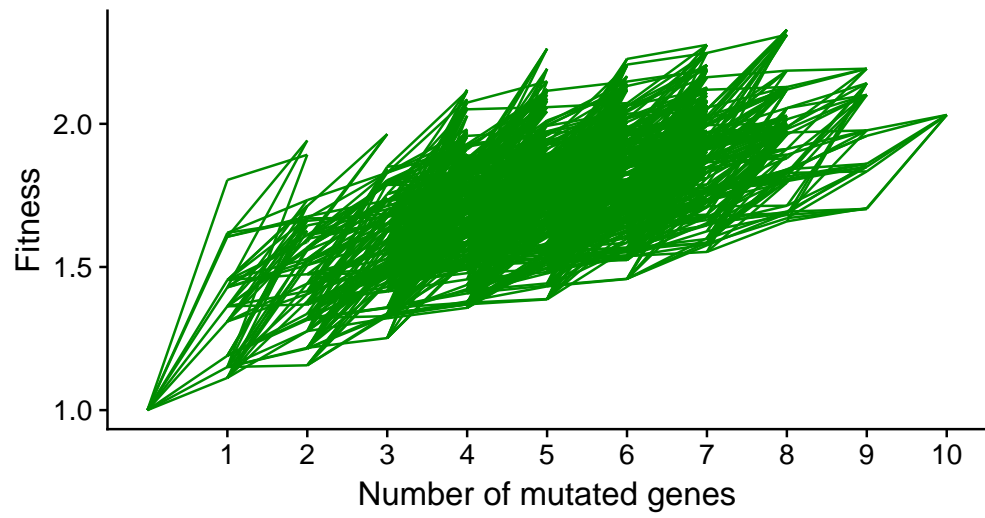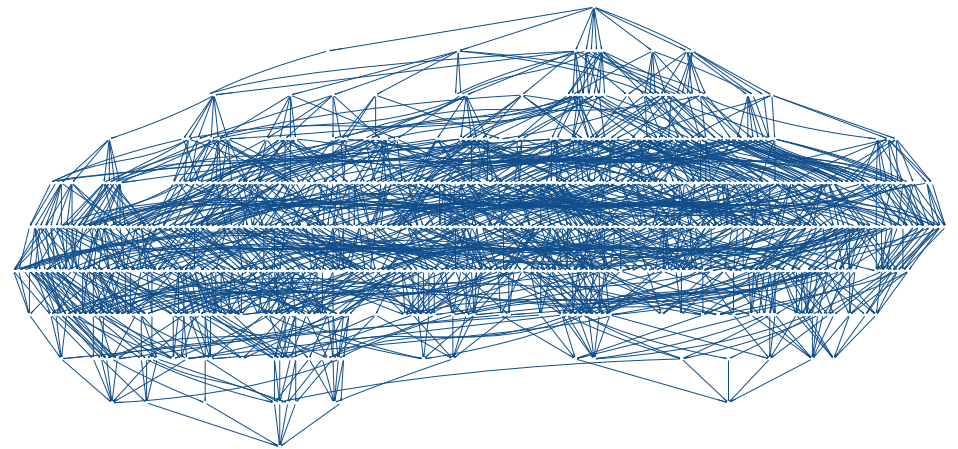



ID W10ljZVnZ1043hQUxi  
acc genotypes 388  
peaks no back 70  
removed edges NA  
prop rem edges NA

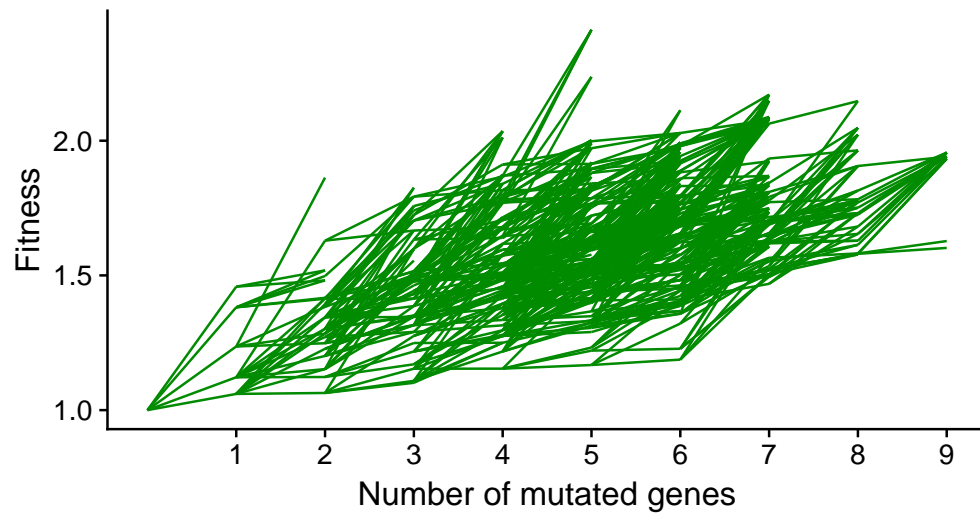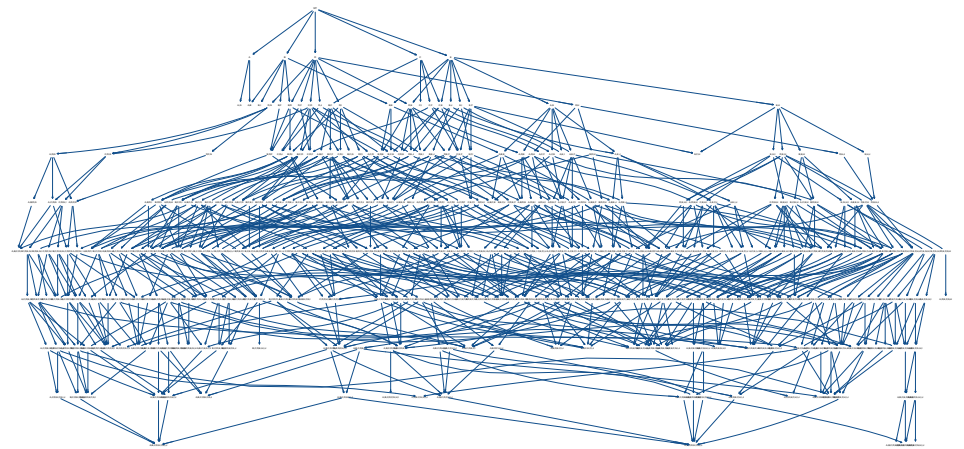

ID wM4mouEZ5iUOoAtX  
acc genotypes 143  
peaks no back 52  
removed edges NA  
prop rem edges NA

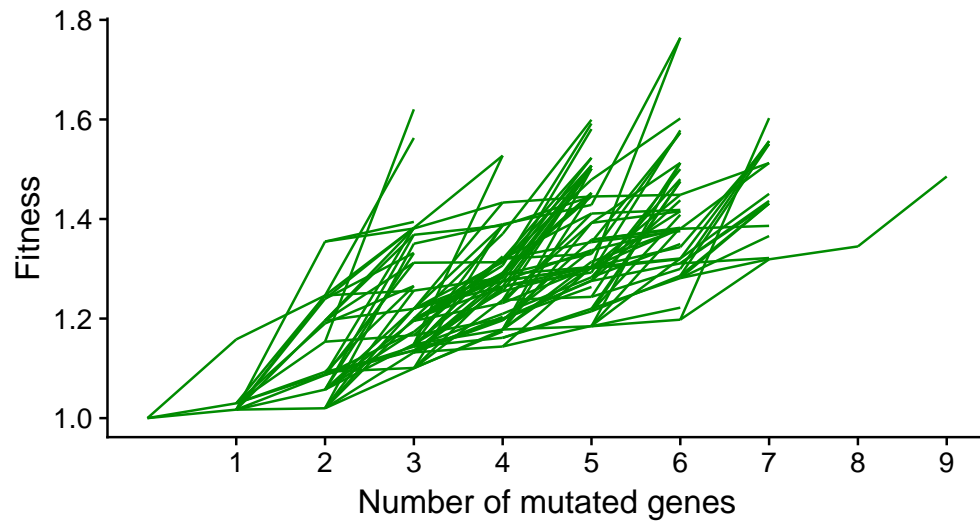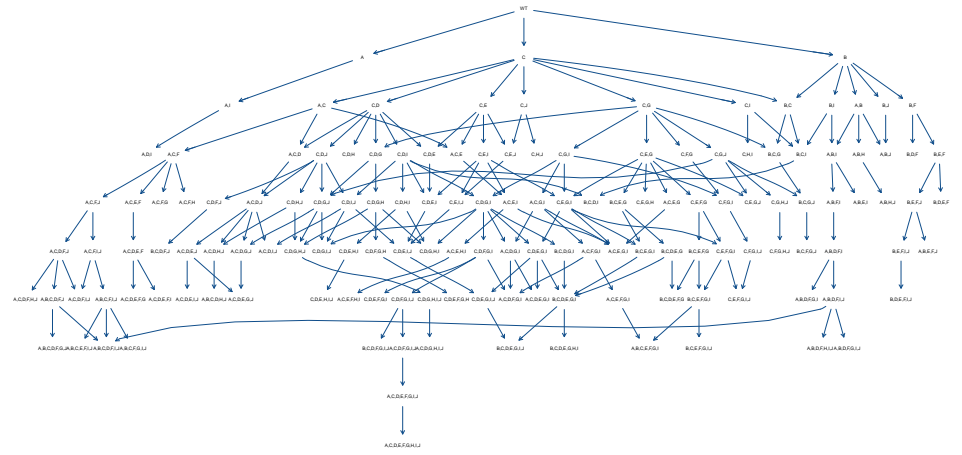



*ID* wOuBisYKAAzBpTkz  
*acc genotypes* 191  
*peaks no back* 69  
*removed edges* NA  
*prop rem edges* NA

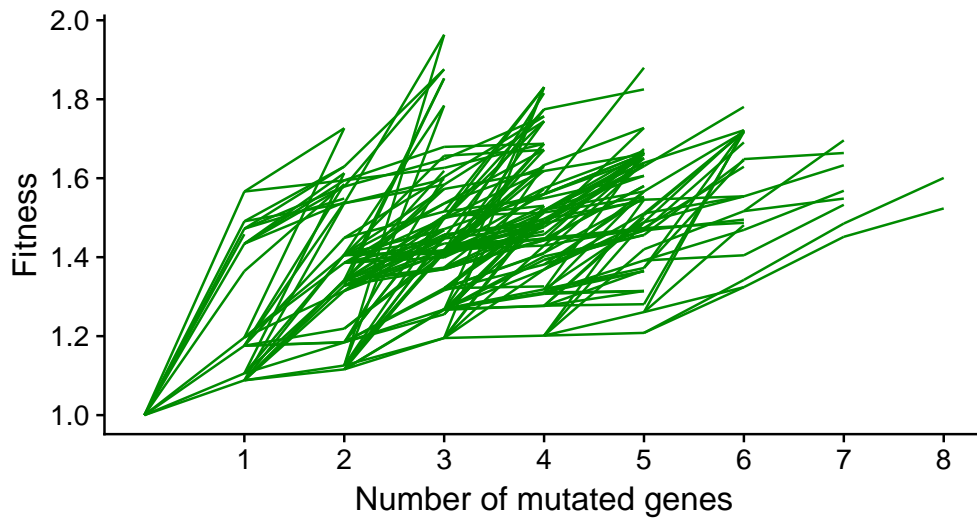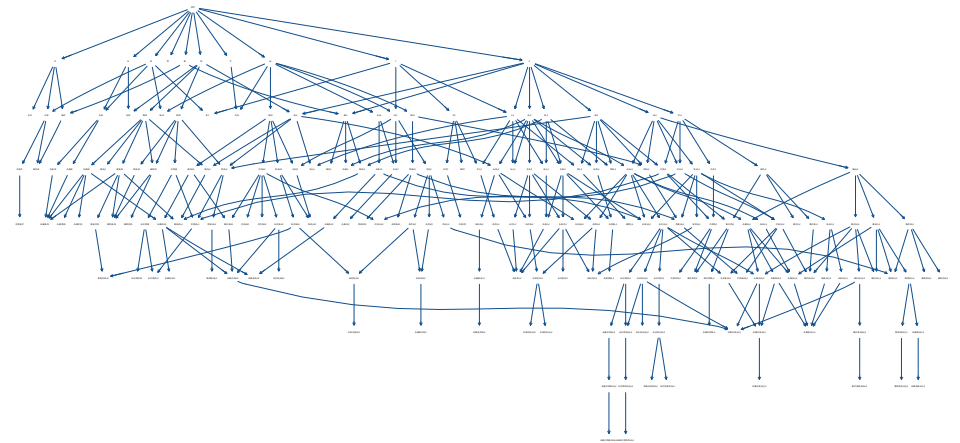

*ID* wuF5q9kOxSCRE7RX  
*acc genotypes* 728  
*peaks no back* 82  
*removed edges* NA  
*prop rem edges* NA

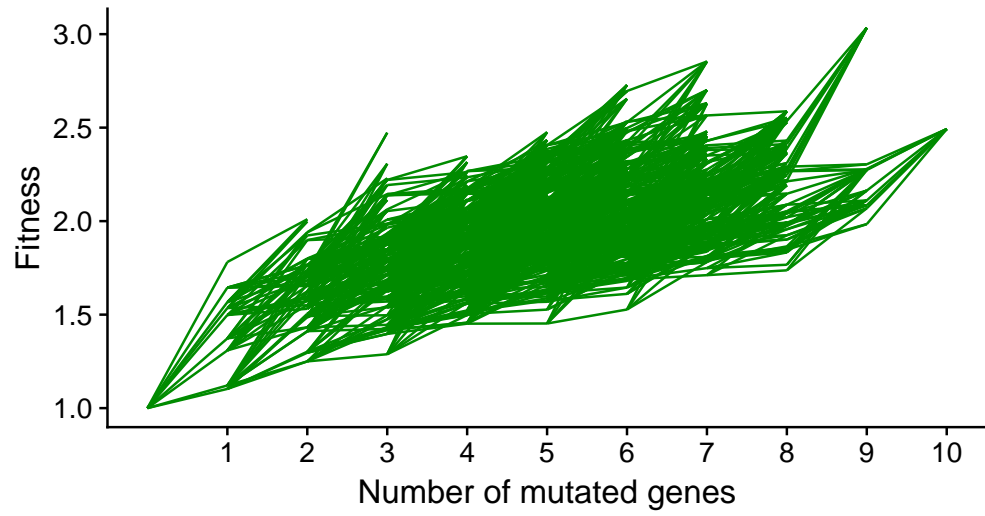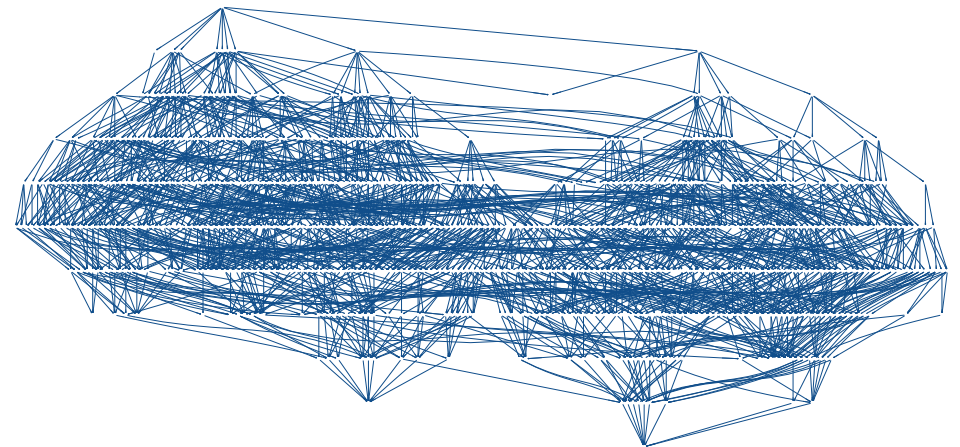

ID wwBtyDIZSVYRmVqi  
acc genotypes 222  
peaks no back 83  
removed edges NA  
prop rem edges NA

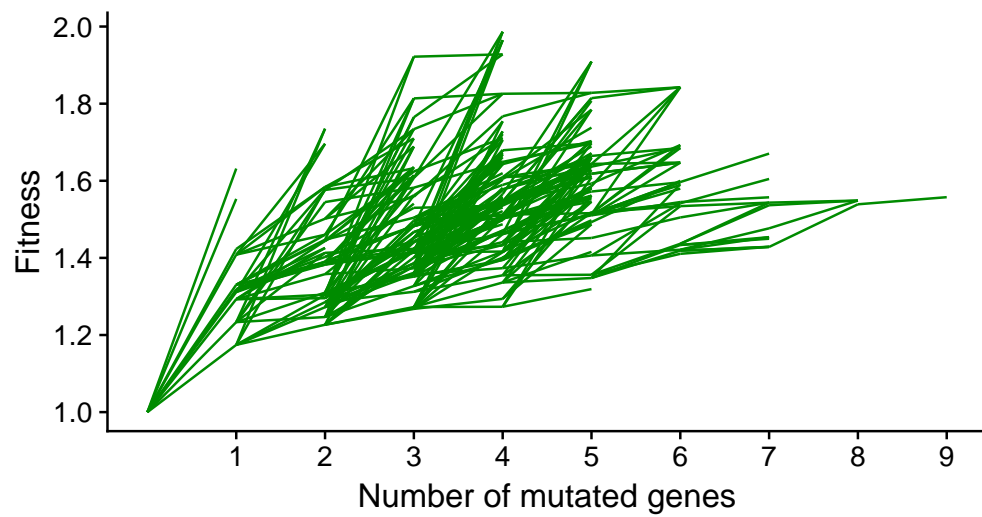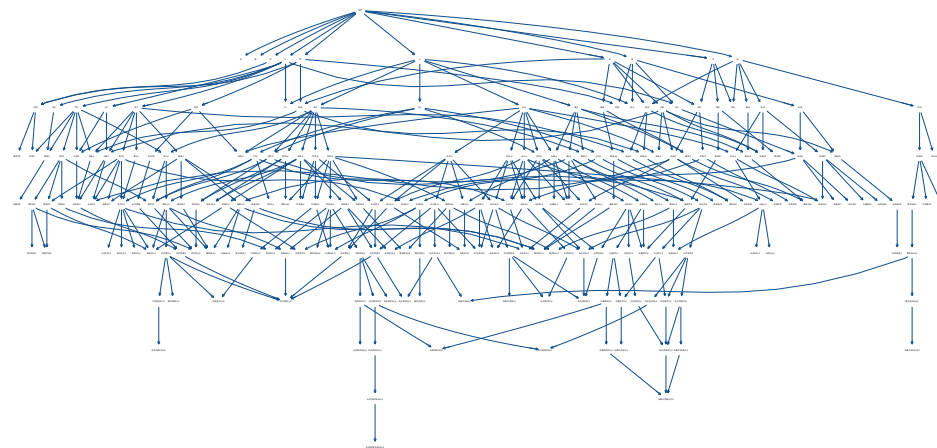

ID [wXZJGUyFMo10NI4dV](#)  
 acc genotypes 89  
 peaks no back 42  
 removed edges NA  
 prop rem edges NA

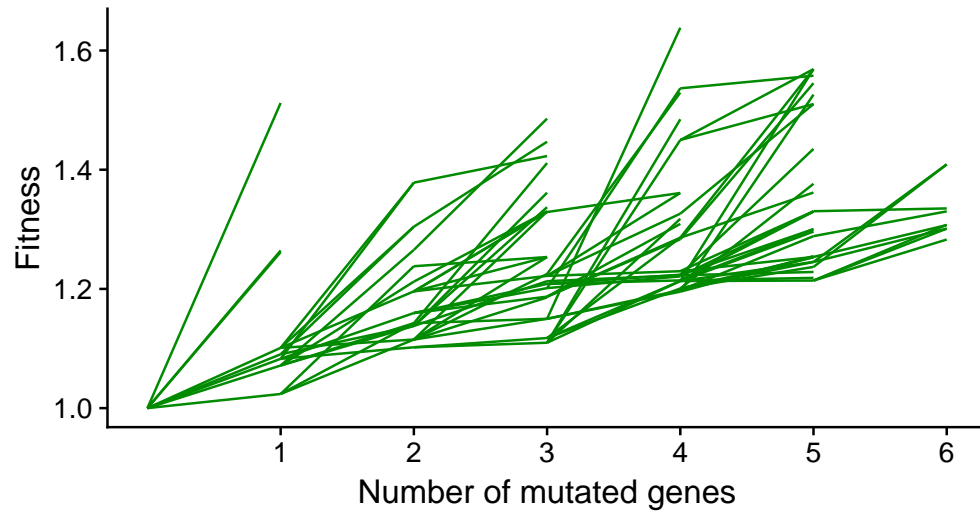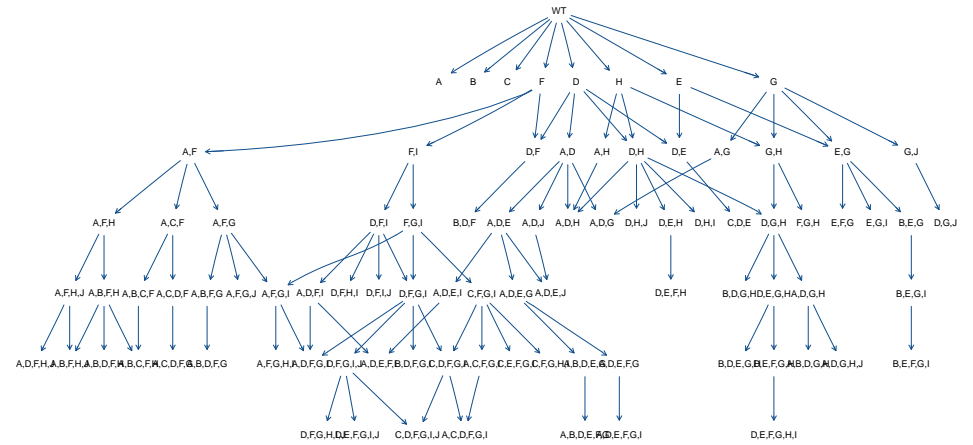

ID WYBRgQ10JLk3RhGLo  
acc genotypes 433  
peaks no back 115  
removed edges NA  
prop rem edges NA

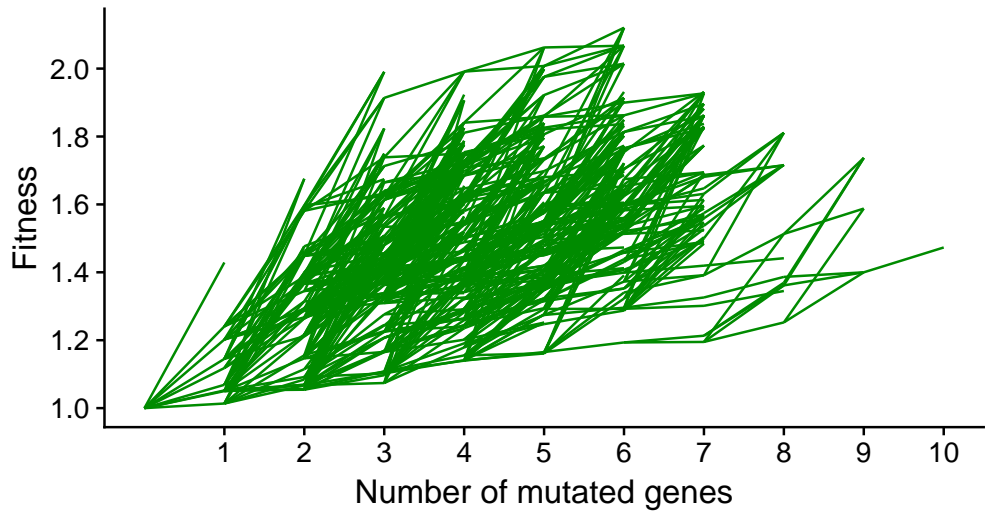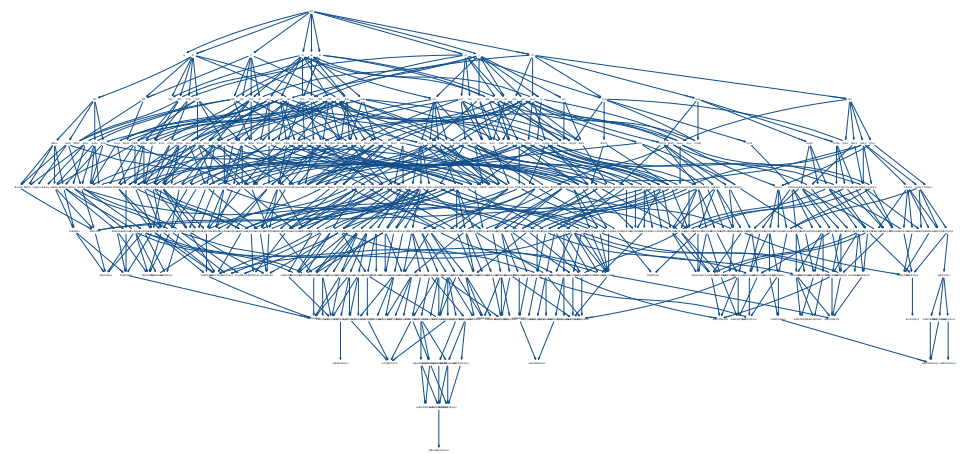

ID WZ96wrbzeKdxcOJ3  
 acc genotypes 141  
 peaks no back 57  
 removed edges NA  
 prop rem edges NA

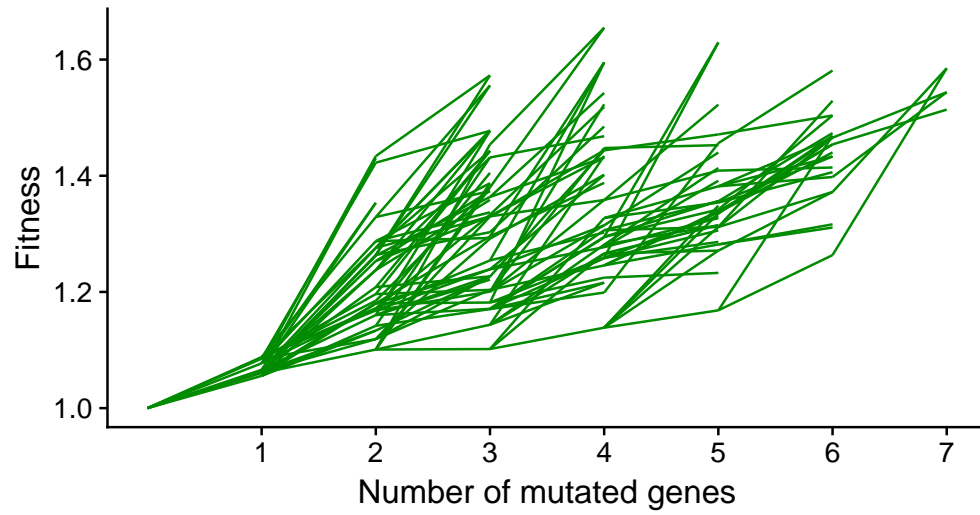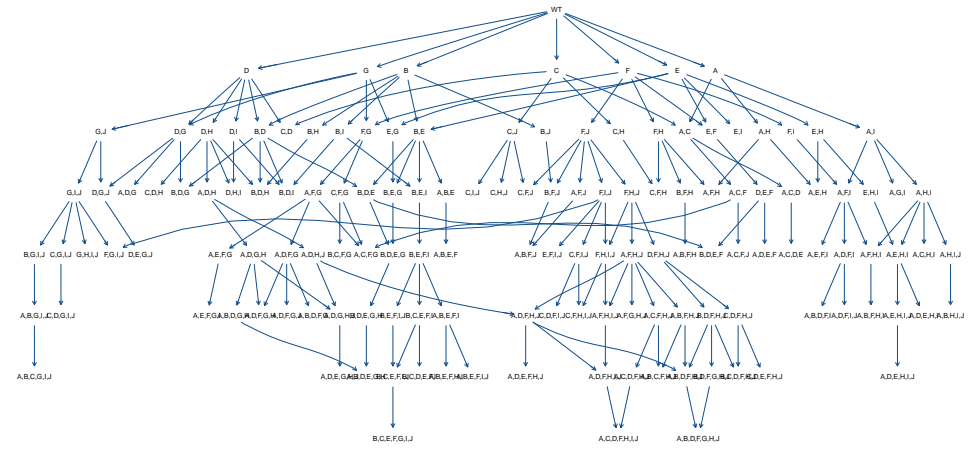

ID X6Z5TgU29GZVilQy  
acc genotypes 620  
peaks no back 75  
removed edges NA  
prop rem edges NA

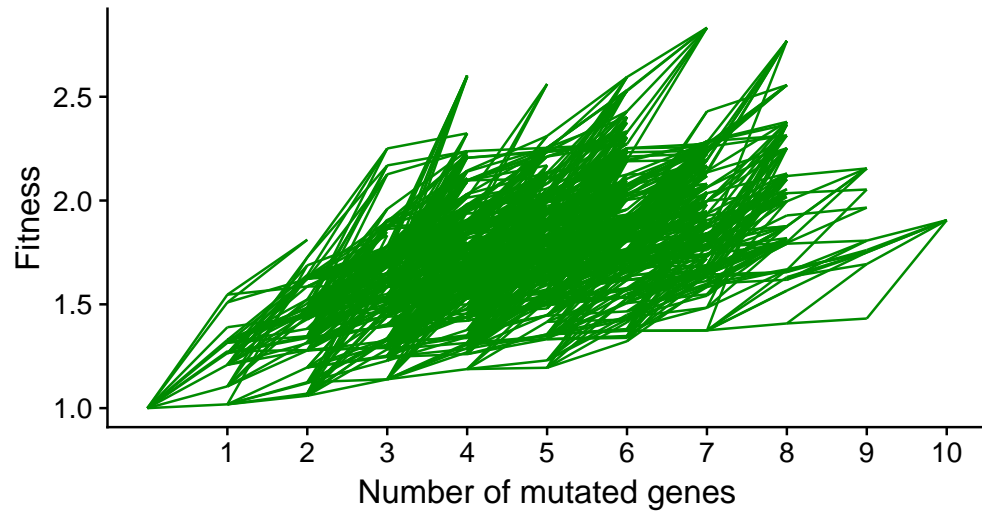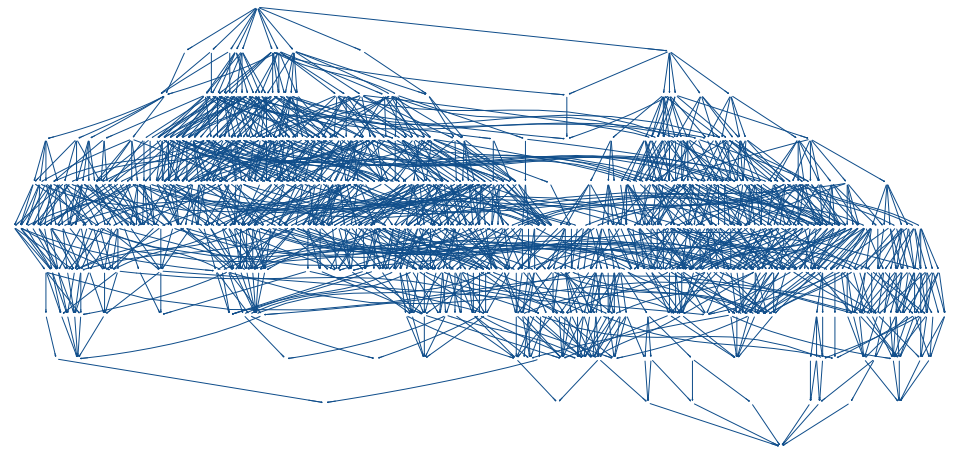

ID x8IUObt10WI39iG2  
acc genotypes 209  
peaks no back 81  
removed edges NA  
prop rem edges NA

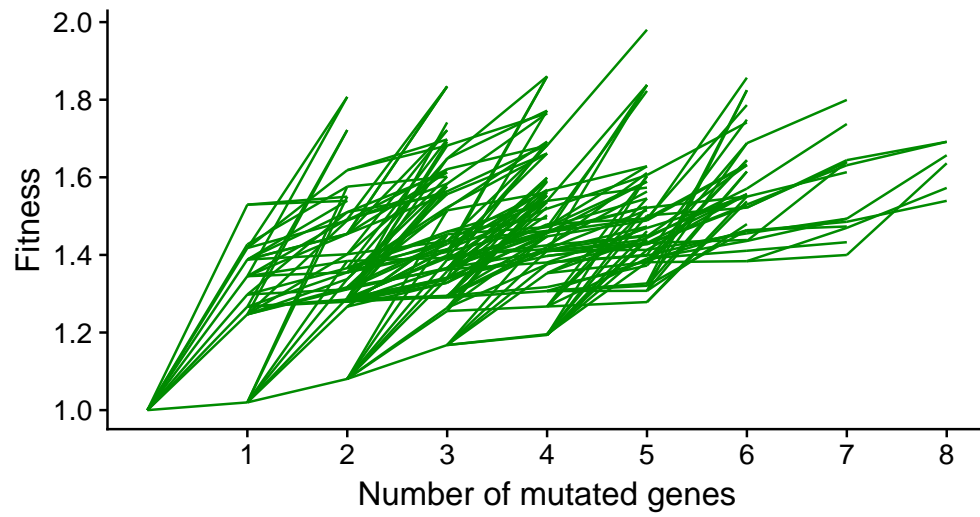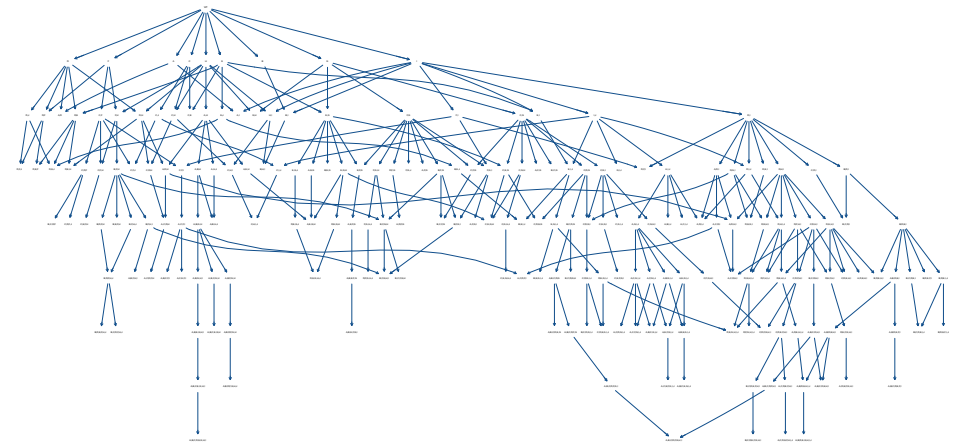



ID xcdQXsmxI7kh5NDZ  
acc genotypes 184  
peaks no back 73  
removed edges NA  
prop rem edges NA

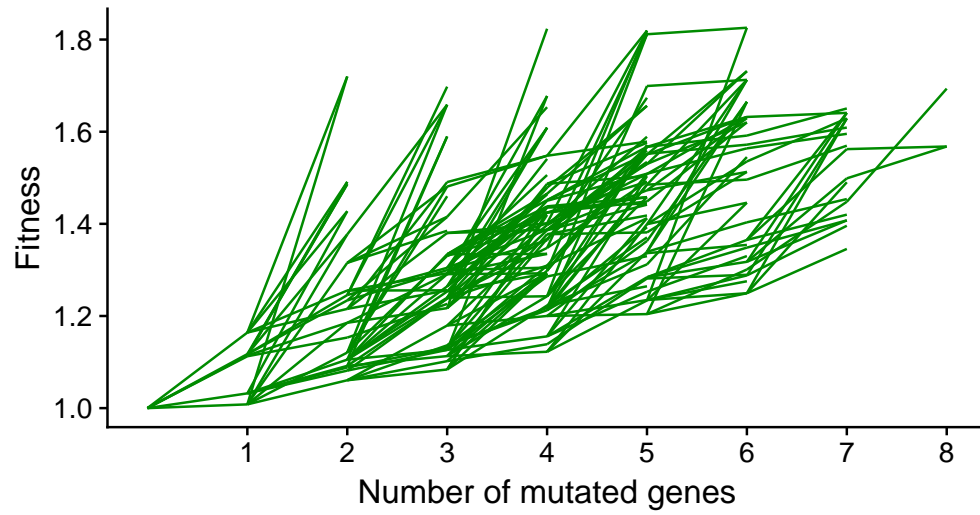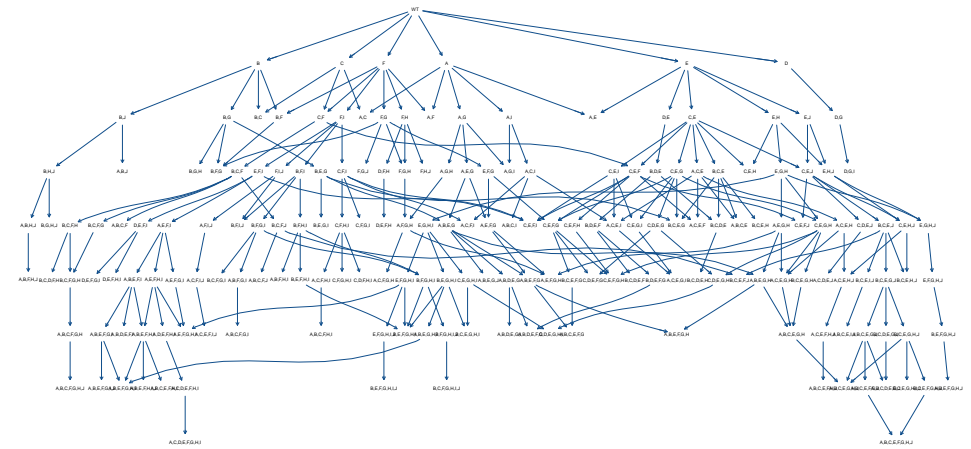

*ID* Xh10HKozlpe9ybd7i  
*acc genotypes* 200  
*peaks no back* 89  
*removed edges* NA  
*prop rem edges* NA

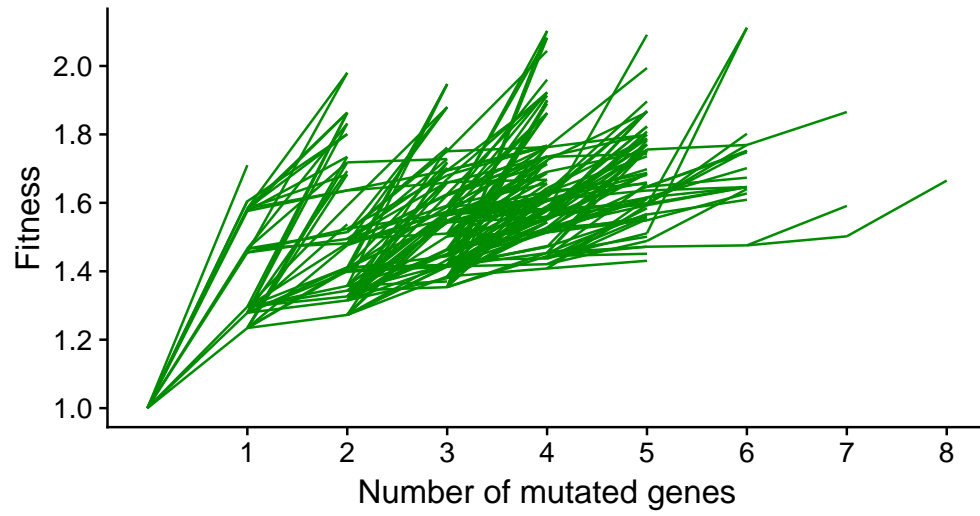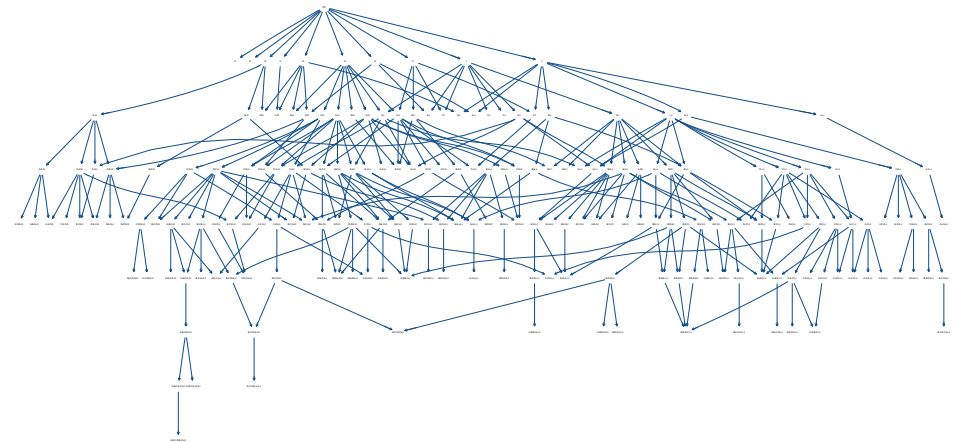

ID XKTMaTNASYWPIHNI  
acc genotypes 352  
peaks no back 105  
removed edges NA  
prop rem edges NA

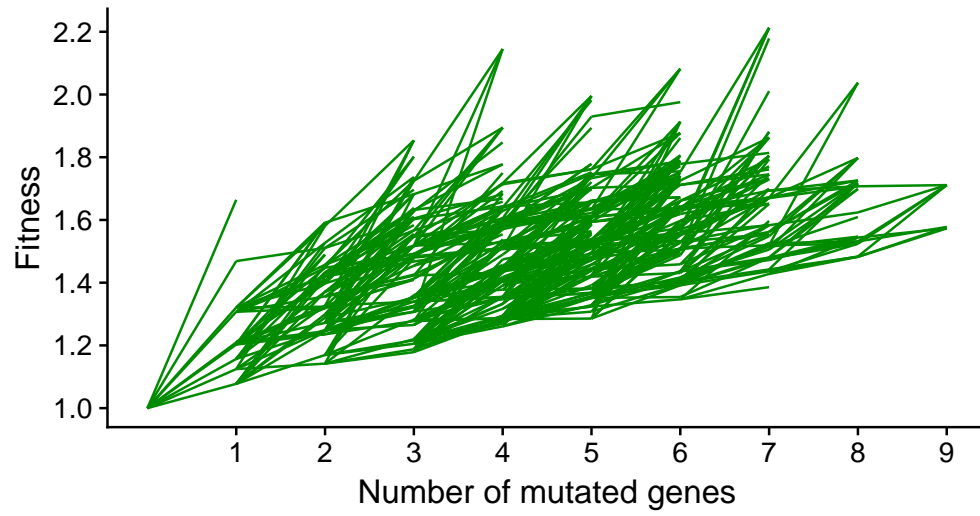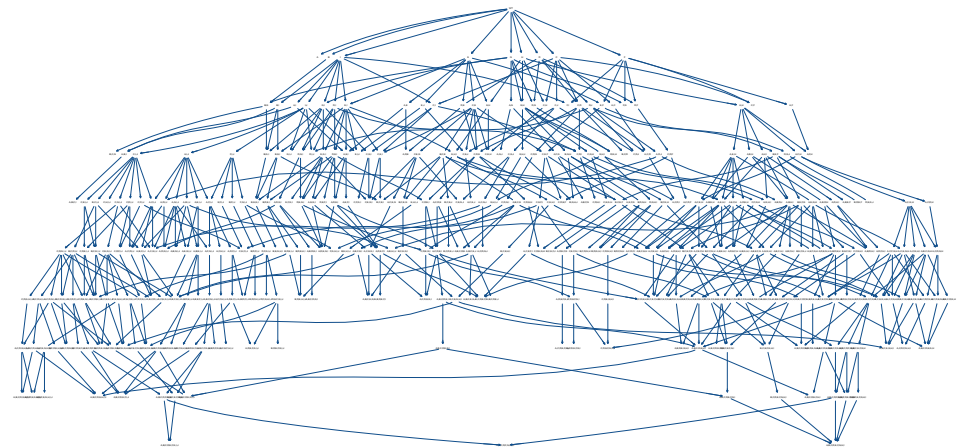

ID XNRZEeV3I3oHG9g1  
acc genotypes 424  
peaks no back 121  
removed edges NA  
prop rem edges NA

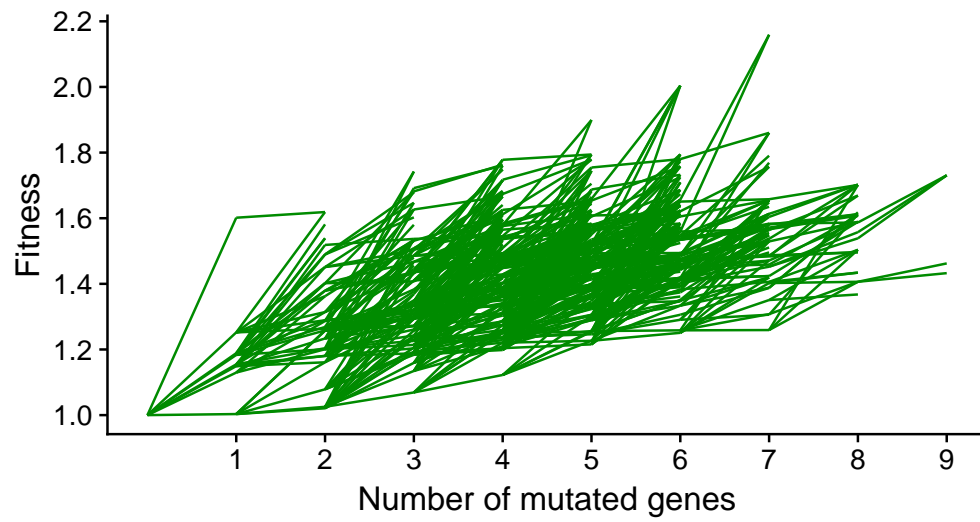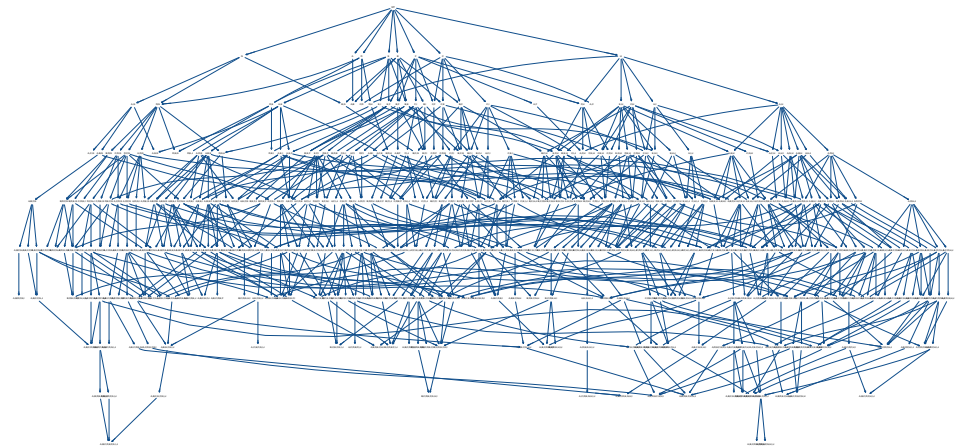

ID XrjsetS7KL5noi92  
 acc genotypes 89  
 peaks no back 26  
 removed edges NA  
 prop rem edges NA

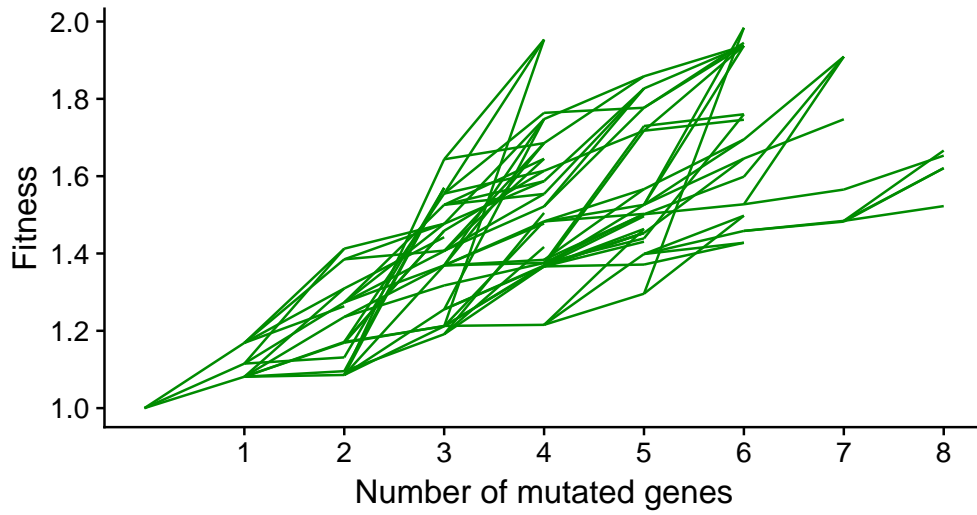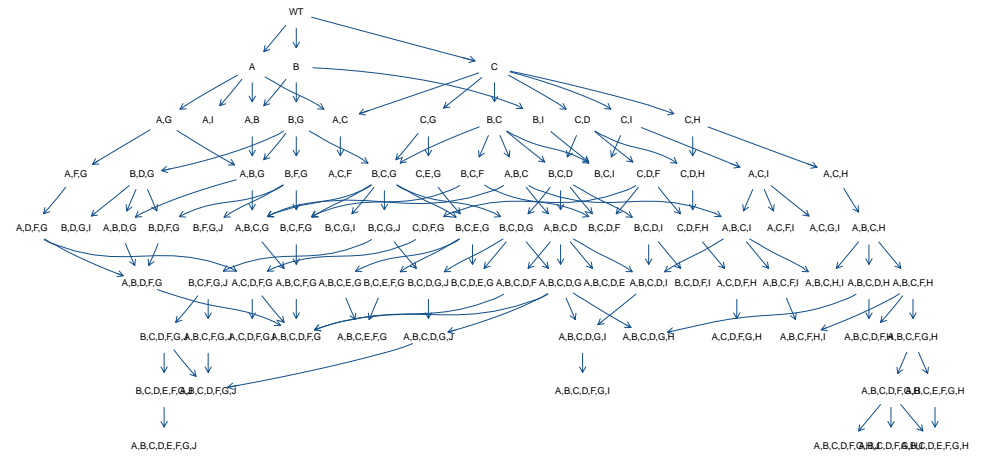



ID **xwEXGxQHVPacEqsW**  
 acc genotypes **67**  
 peaks no back **26**  
 removed edges **NA**  
 prop rem edges **NA**

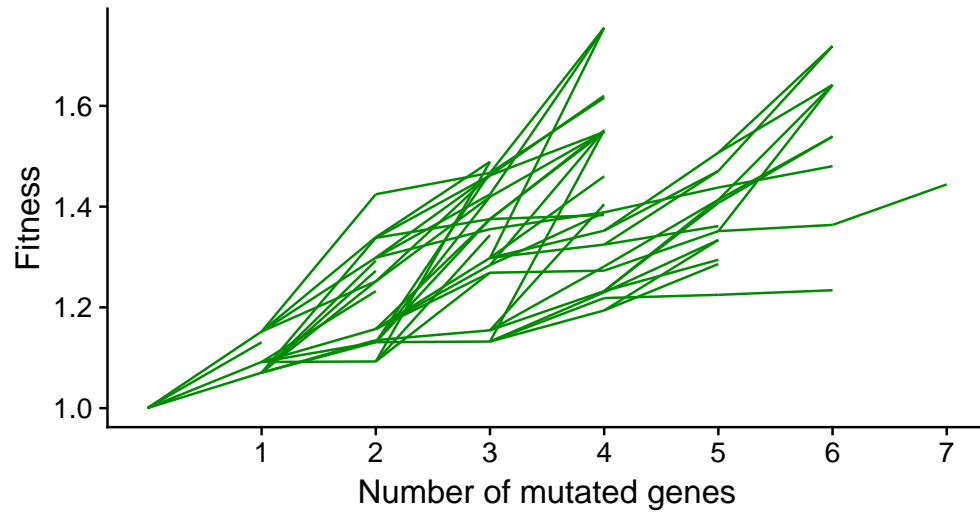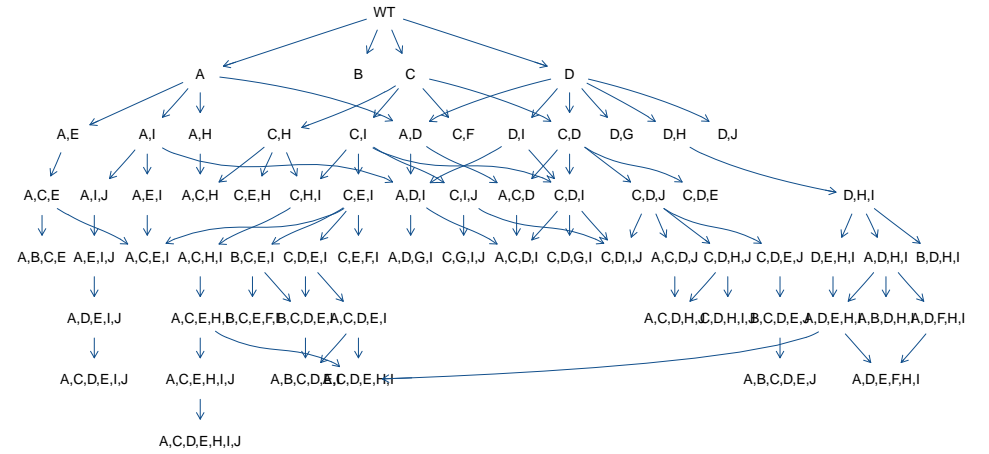

*ID* xZ63211FnE2fDF10q  
*acc genotypes* 663  
*peaks no back* 72  
*removed edges* NA  
*prop rem edges* NA

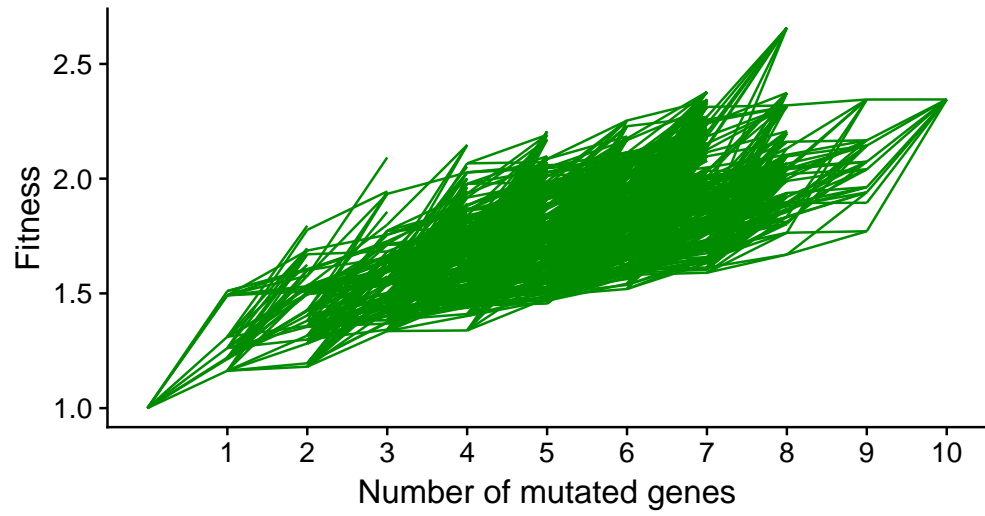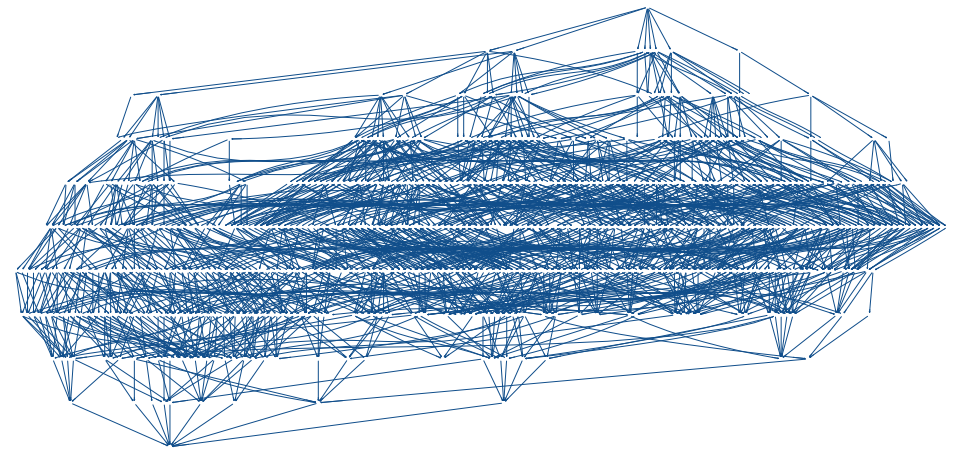



ID y5oNzDs3V3q7y3ih  
acc genotypes 297  
peaks no back 91  
removed edges NA  
prop rem edges NA

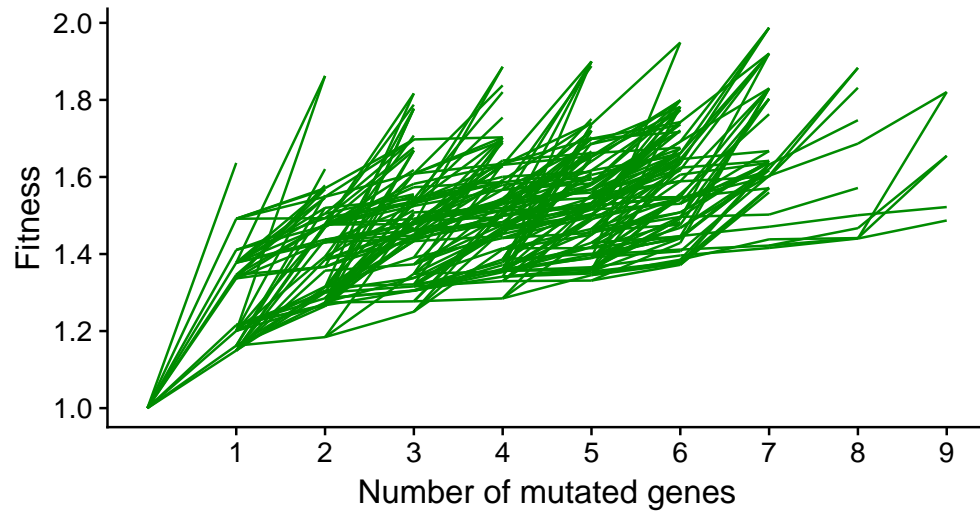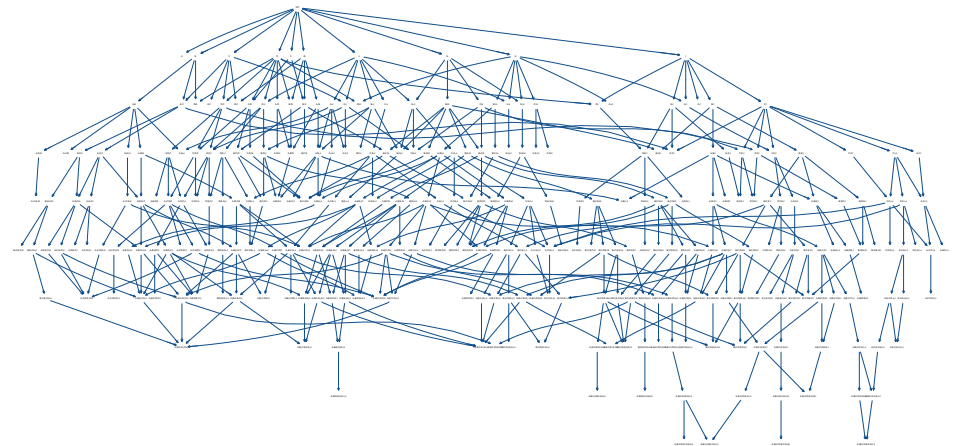

ID YeUw4gB10IT8FRdhX  
acc genotypes 110  
peaks no back 46  
removed edges NA  
prop rem edges NA

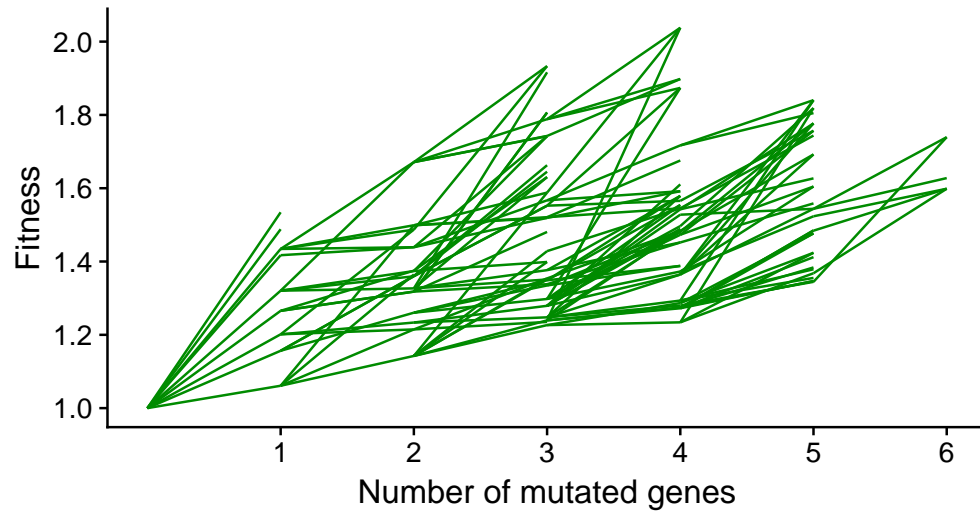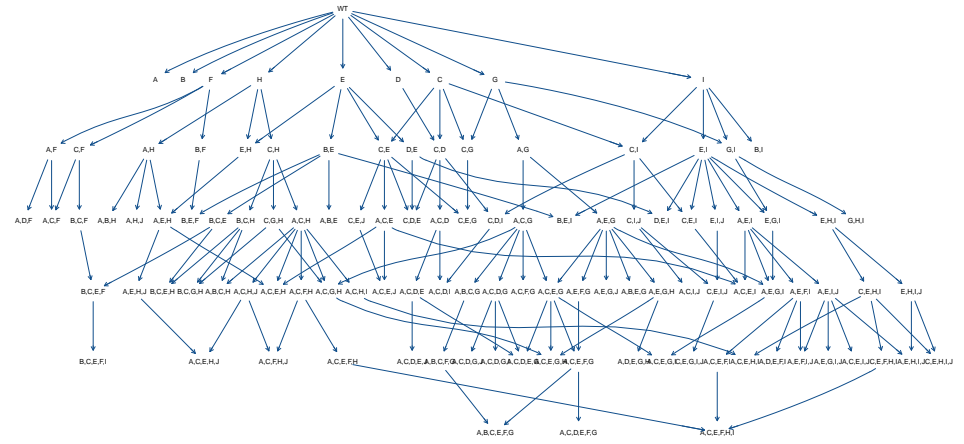

ID Yg8zLevZ7wA4DC3B  
acc genotypes 147  
peaks no back 48  
removed edges NA  
prop rem edges NA

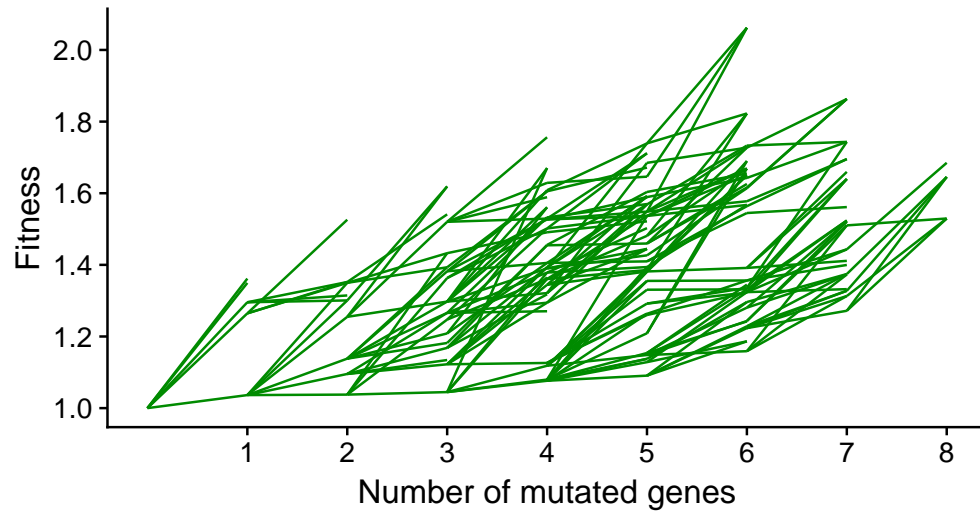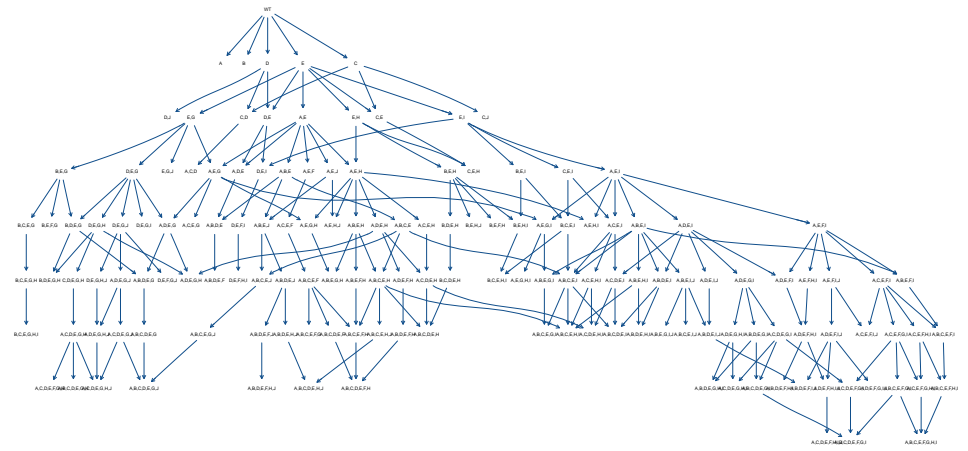

ID YqlzMXE6SnRITBq5  
 acc genotypes 73  
 peaks no back 37  
 removed edges NA  
 prop rem edges NA

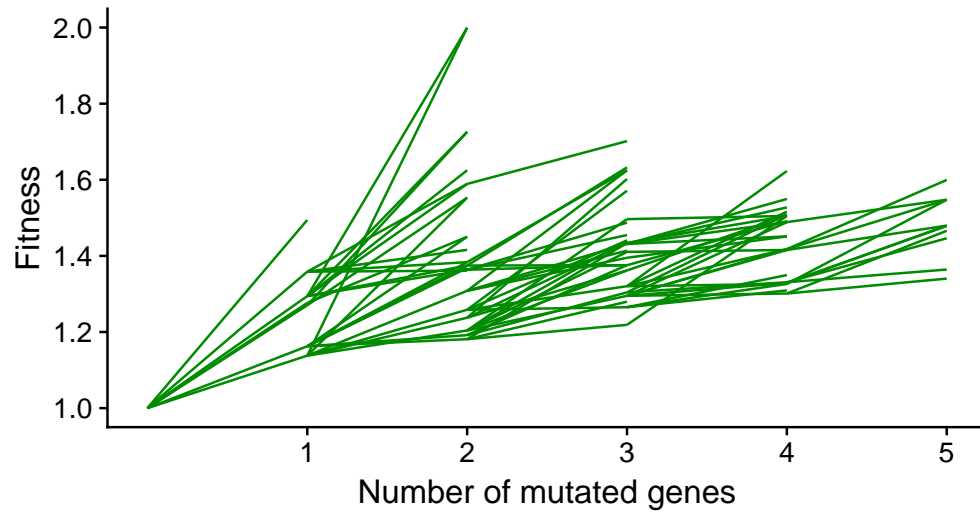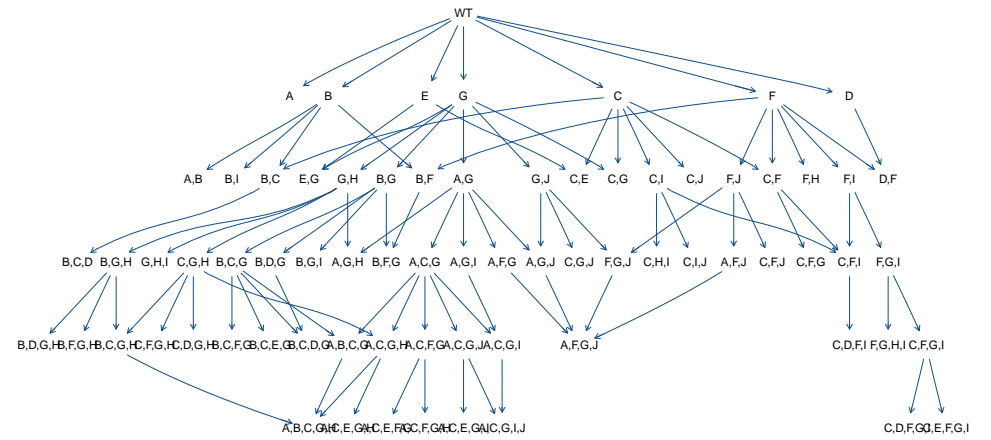

ID YSwbWvqbUeR10s1p8  
acc genotypes 279  
peaks no back 73  
removed edges NA  
prop rem edges NA

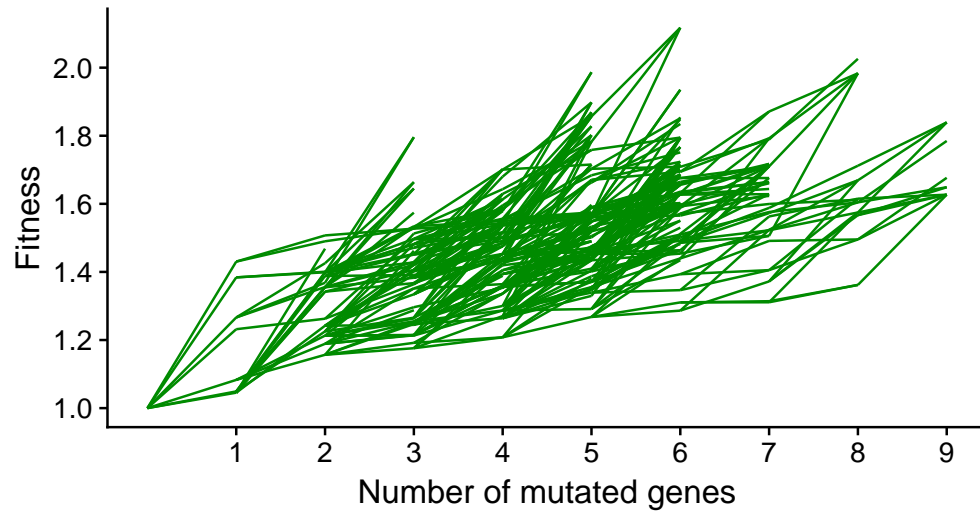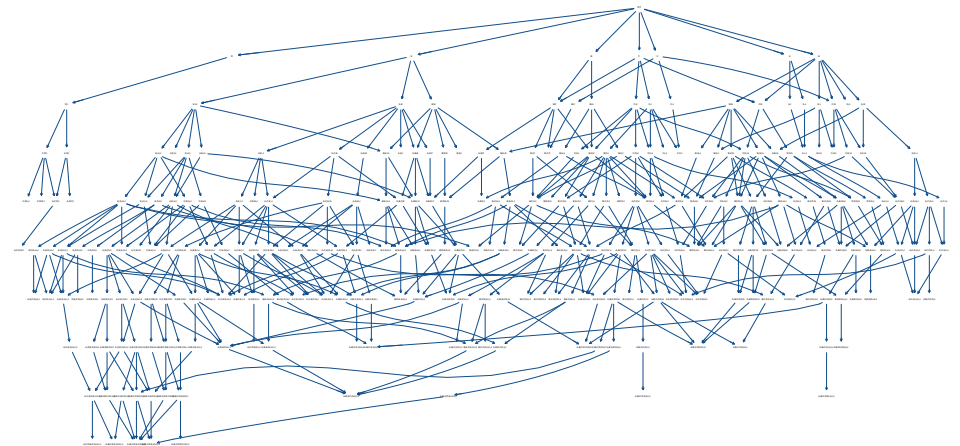

ID zaGCXdhS1IAYBVF  
acc genotypes 242  
peaks no back 91  
removed edges NA  
prop rem edges NA

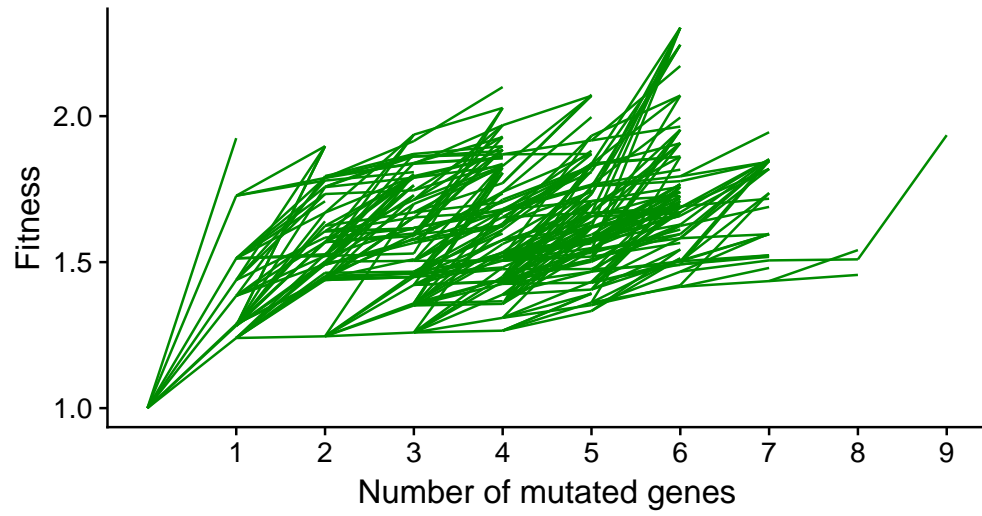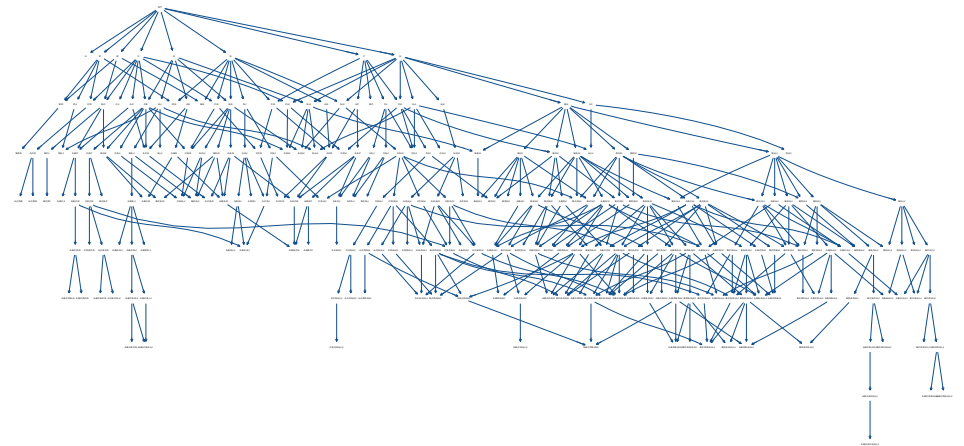

*ID* ZARoxejcvdMx5gej  
*acc genotypes* 335  
*peaks no back* 87  
*removed edges* NA  
*prop rem edges* NA

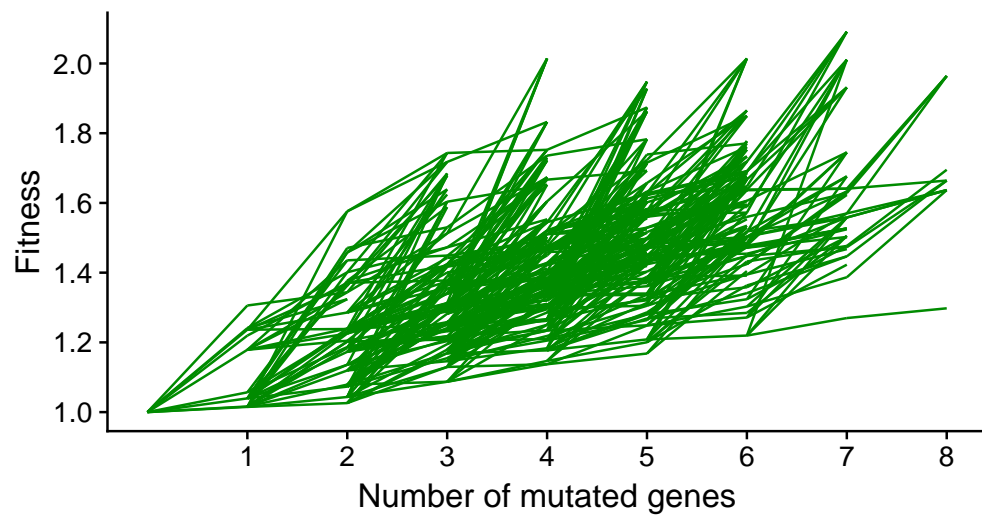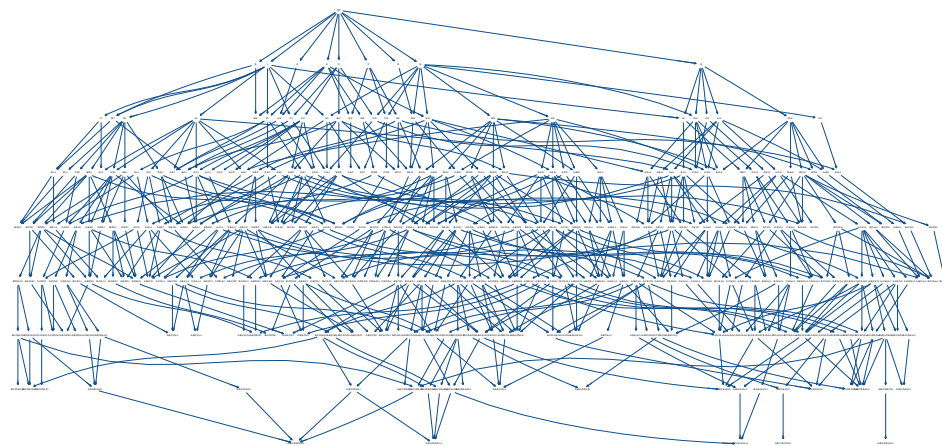

ID [zdCbK9OwSeu3jN2k](#)  
 acc genotypes 26  
 peaks no back 12  
 removed edges NA  
 prop rem edges NA

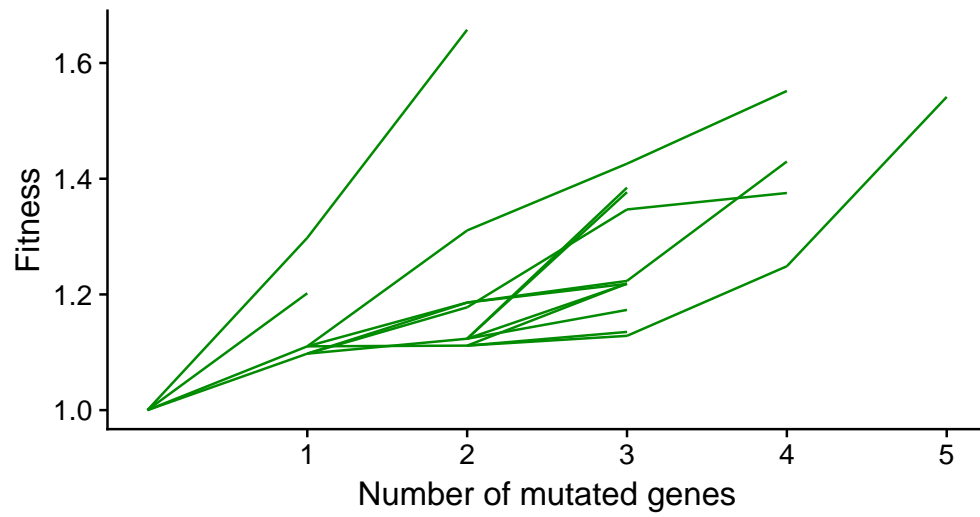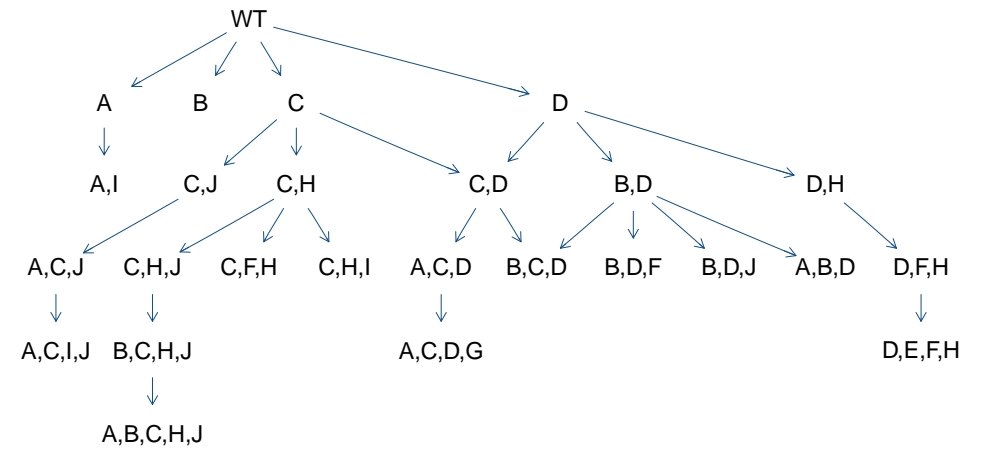



ID Zi10rjNfw5yh1JEKK  
 acc genotypes 37  
 peaks no back 15  
 removed edges NA  
 prop rem edges NA

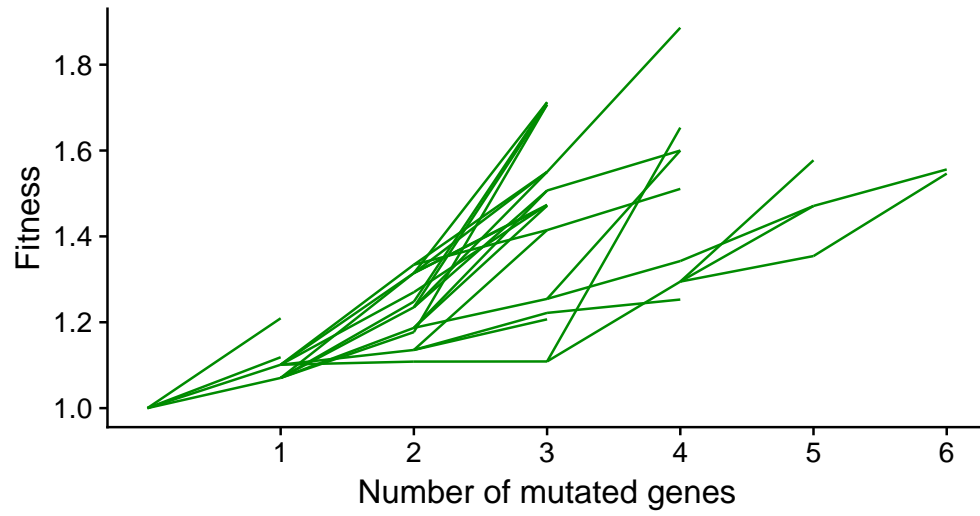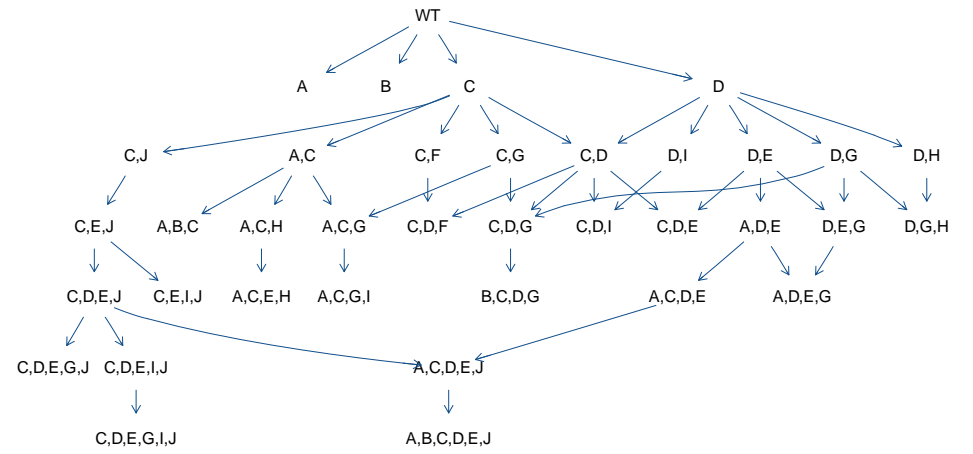

ID ZlwKQjyTXgfkZAaS  
acc genotypes 367  
peaks no back 83  
removed edges NA  
prop rem edges NA

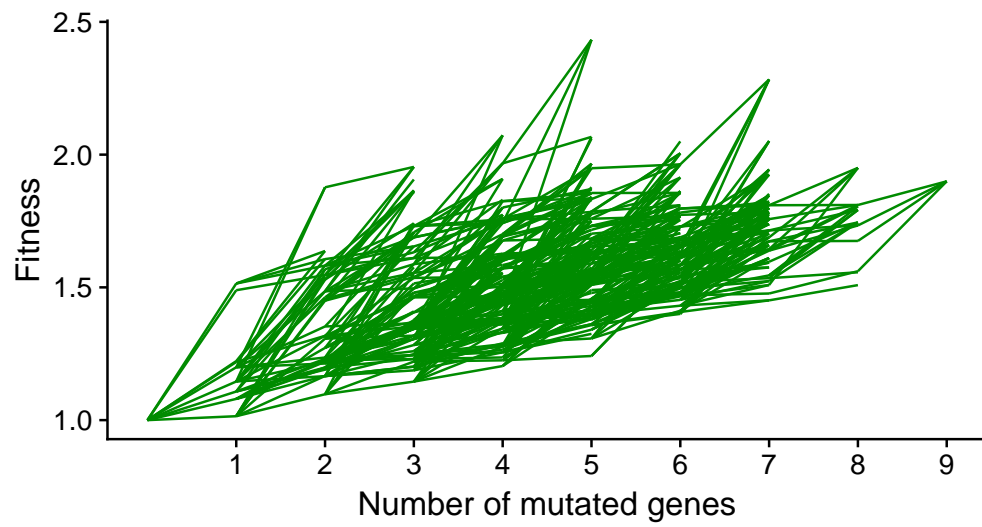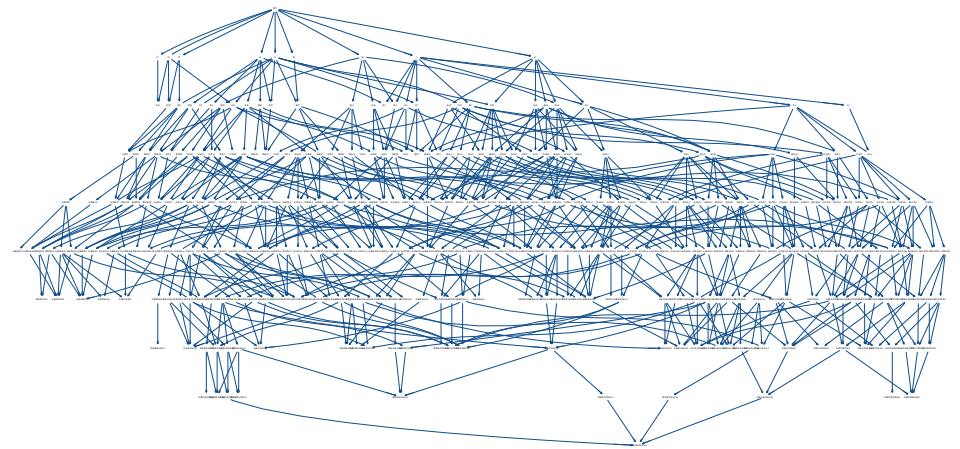

ID zja2YeEj3wZTfoRu  
 acc genotypes 121  
 peaks no back 36  
 removed edges NA  
 prop rem edges NA

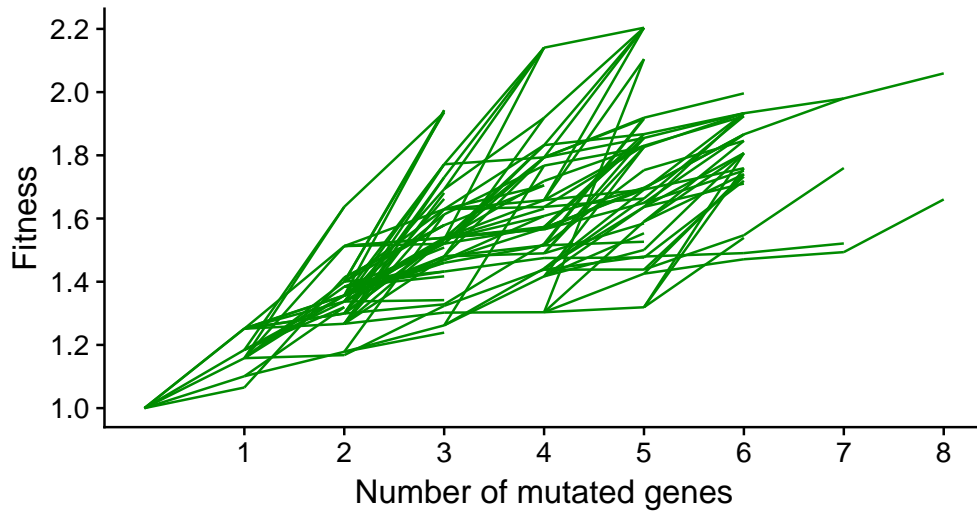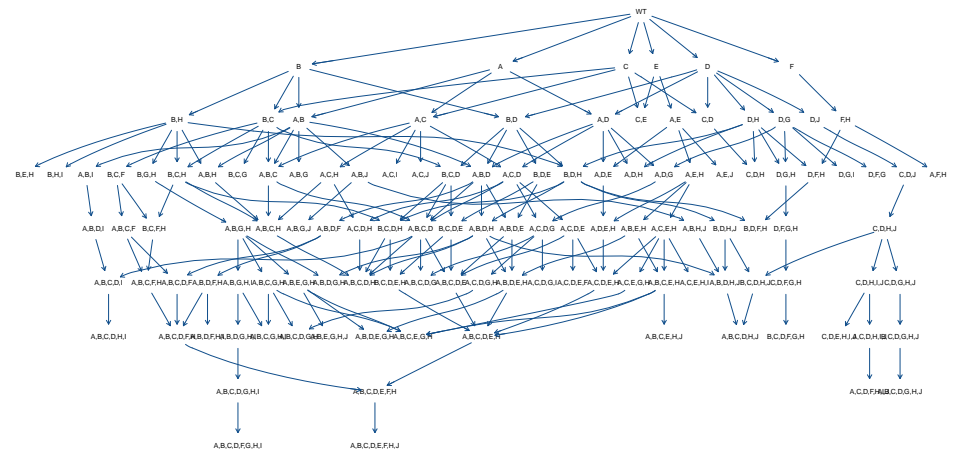

*ID* zk5E1osYtlIv7Cob  
*acc genotypes* 307  
*peaks no back* 54  
*removed edges* NA  
*prop rem edges* NA

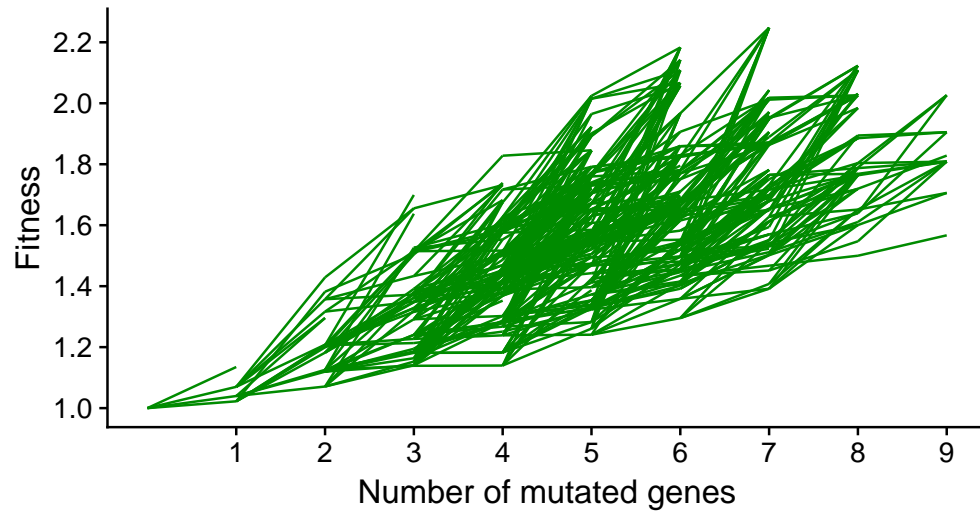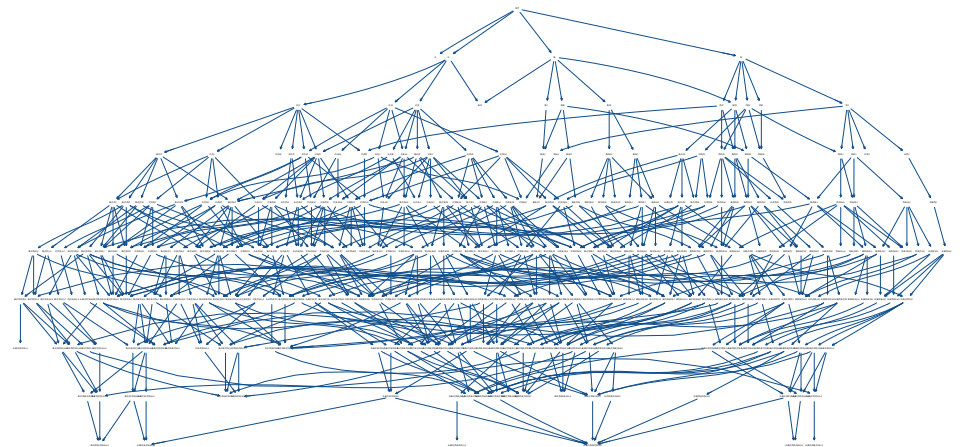

ID zSLtW8y3ke10umntK  
 acc genotypes 98  
 peaks no back 26  
 removed edges NA  
 prop rem edges NA

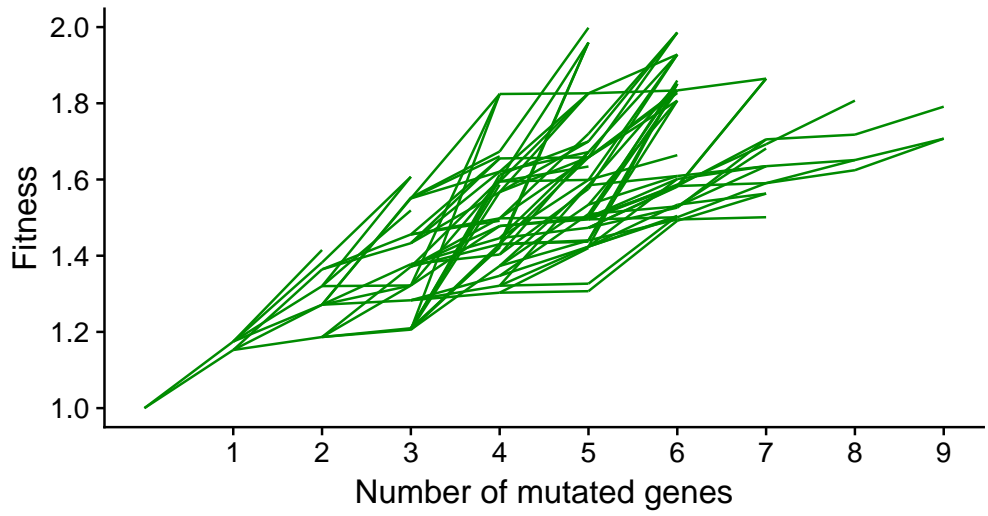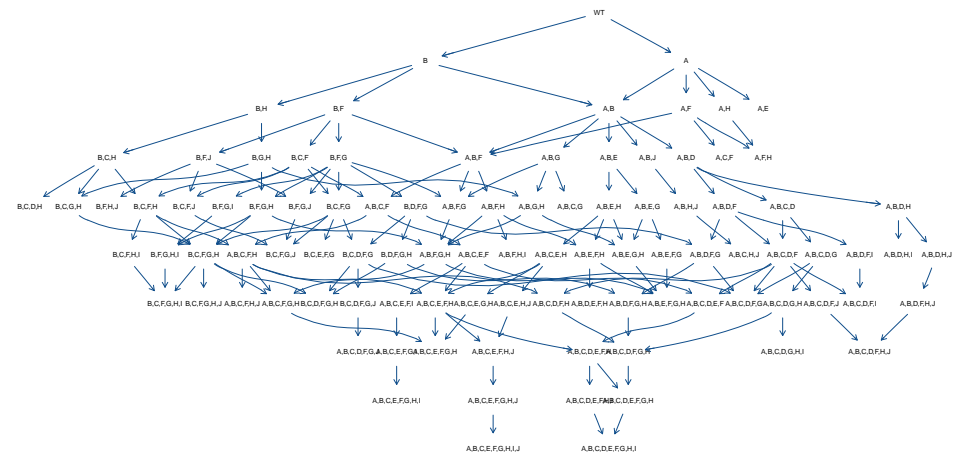

*ID* ZTNMfNi10xGkfS7ED  
*acc genotypes* 534  
*peaks no back* 52  
*removed edges* NA  
*prop rem edges* NA

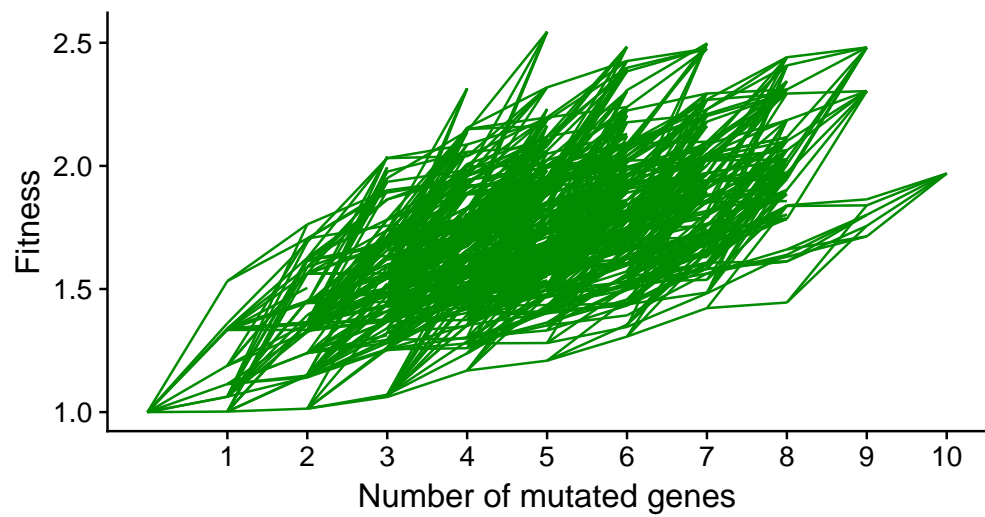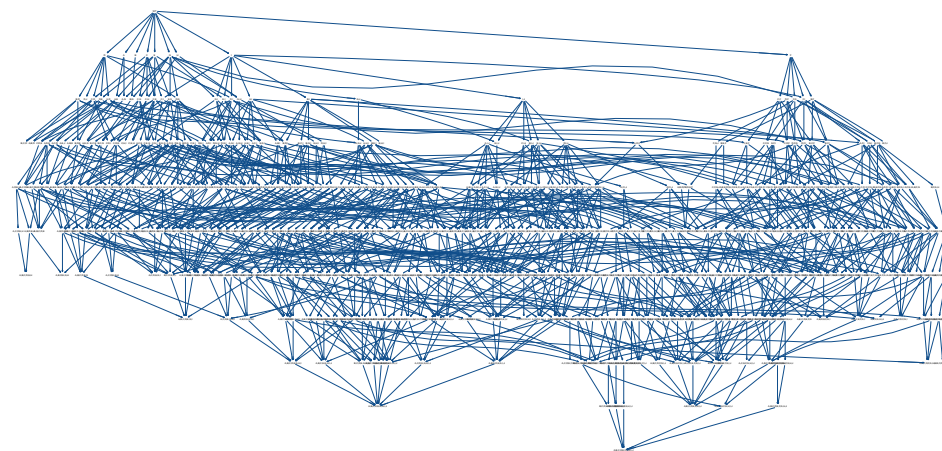

ID ZVzsQZQydHbT4TYZ  
 acc genotypes 42  
 peaks no back 20  
 removed edges NA  
 prop rem edges NA

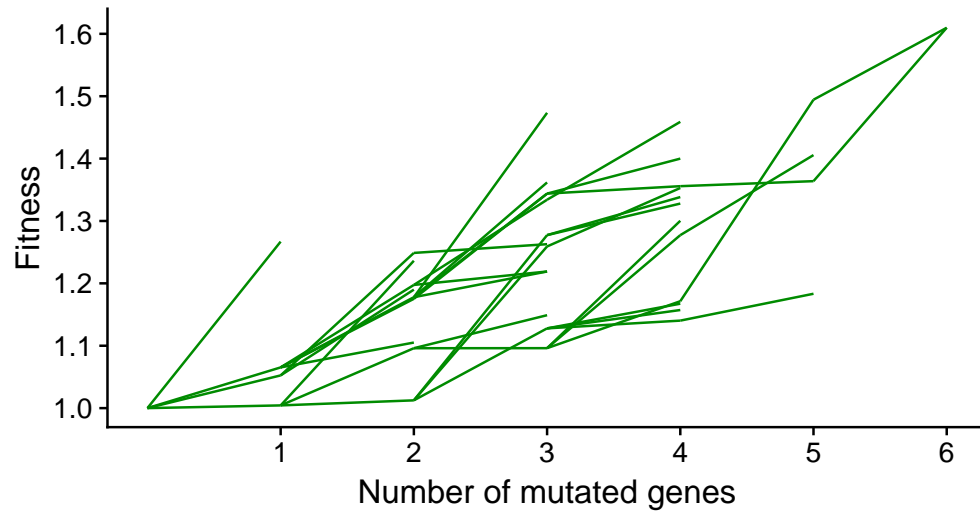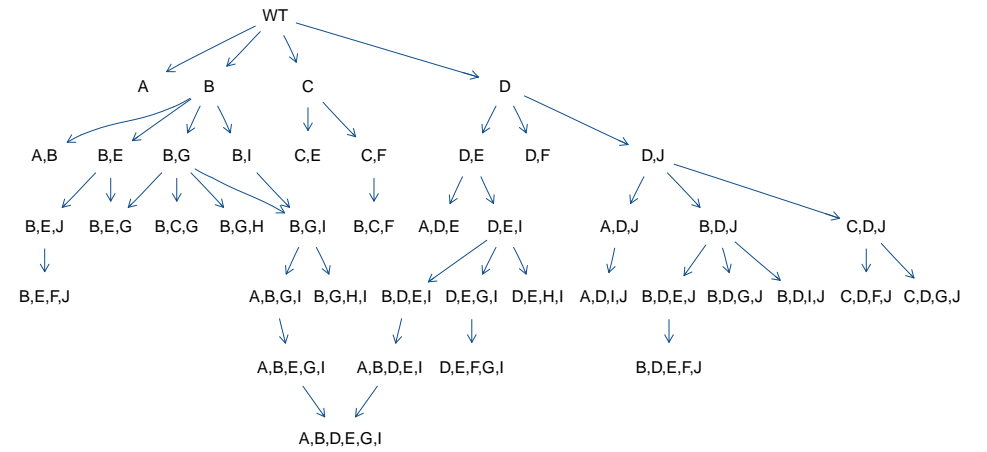

ID zWjhpCHtGUy14jOB  
acc genotypes 154  
peaks no back 34  
removed edges NA  
prop rem edges NA

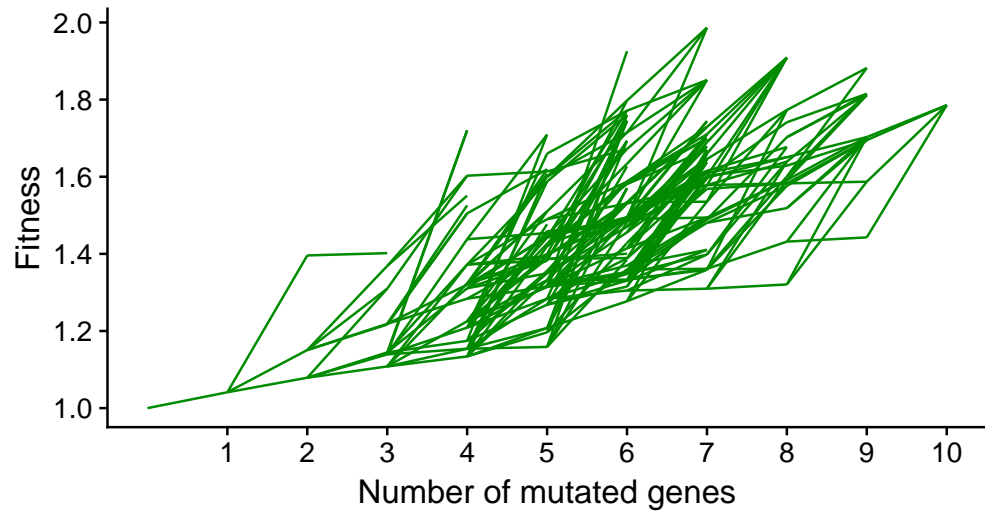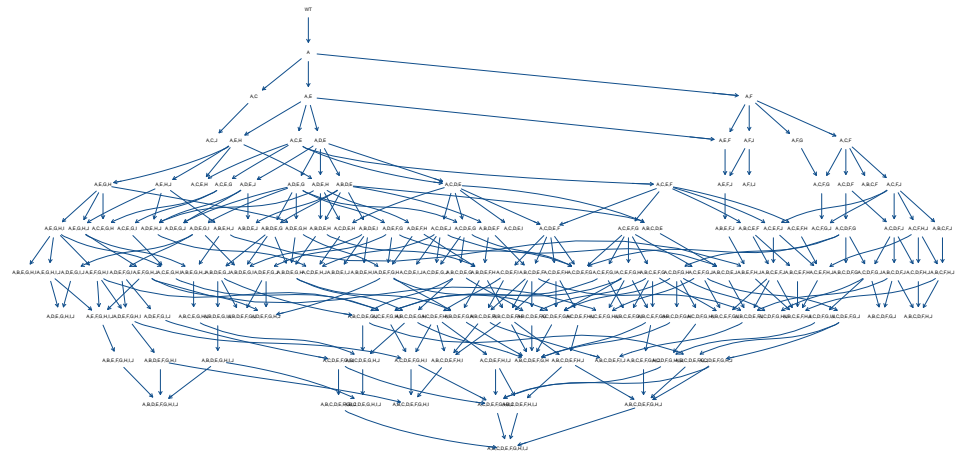

Supplement: pcbi.1007246.s001.pdf [file pcbi.1007246.s001.pdf]
